# Supplementary material for: Early steps of protein disaggregation by Hsp70 chaperone and class B J-domain proteins are shaped by Hsp110
Source: eLife. 2024 Oct 15;13:RP94795. doi: 10.7554/eLife.94795 (PMC11479587; doi:10.7554/eLife.94795)
Supplement: Figure 1—figure supplement 1—source data 1. [file elife-94795-fig1-figsupp1-data1.xlsx]

## Sheet: Figure 1—figure supplement 1A
Time (min)	Ssa1, Ydj1			Ssa1, Ydj1, Sse1			Ssa1, Sis1			Ssa1, Sis1, Sse1
1	0.678875	0.6412	0.646475	0.663625	0.746525	0.663725	0.7013	0.696875	0.695725	0.69465	0.683175	0.650825
2	0.684725	0.64075	0.654725	0.6724	0.765625	0.67105	0.7033	0.69545	0.68555	0.701	0.6832	0.65315
3	0.6868	0.64845	0.6548	0.672375	0.774275	0.6736	0.702375	0.701725	0.701275	0.69125	0.6914	0.66265
4	0.70365	0.6491	0.6575	0.688225	0.77485	0.68705	0.7034	0.713625	0.69105	0.6936	0.68495	0.656725
5	0.705825	0.659725	0.66685	0.70525	0.7893	0.707	0.703875	0.715125	0.69395	0.701525	0.698125	0.67955
6	0.701275	0.66155	0.65815	0.718475	0.794875	0.71245	0.709775	0.7133	0.707875	0.722775	0.711025	0.686075
7	0.719725	0.66615	0.6781	0.735	0.80905	0.733475	0.7091	0.709825	0.711375	0.7286	0.71325	0.712025
8	0.73265	0.67405	0.68235	0.742425	0.8341	0.7675	0.717325	0.717825	0.723675	0.7528	0.74685	0.732975
9	0.743525	0.693625	0.6833	0.782375	0.85285	0.7807	0.72425	0.727075	0.726975	0.77305	0.772725	0.7622
10	0.771875	0.704975	0.696575	0.802	0.8702	0.8116	0.727225	0.7297	0.7356	0.801625	0.793825	0.807
11	0.770675	0.7062	0.711675	0.809275	0.88315	0.83825	0.7375	0.735	0.74585	0.8454	0.83235	0.850825
12	0.79795	0.7173	0.7317	0.8406	0.91565	0.850825	0.7547	0.743725	0.756325	0.88795	0.87455	0.87515
13	0.80715	0.730325	0.744175	0.857675	0.9282	0.865275	0.75395	0.7644	0.777375	0.919225	0.916925	0.90695
14	0.828775	0.744625	0.751675	0.881925	0.945525	0.9014	0.7704	0.777975	0.79825	0.963075	0.960025	0.9684
15	0.8384	0.763	0.78175	0.902225	0.9705	0.92455	0.7936	0.7874	0.819475	1.01357	0.996725	1.01822
16	0.85995	0.7833	0.7771	0.92625	1.00703	0.959225	0.8034	0.805125	0.8307	1.05593	1.0316	1.0571
17	0.88295	0.785975	0.804725	0.946325	1.025	0.9797	0.82875	0.816175	0.848275	1.09345	1.09007	1.09878
18	0.900825	0.8193	0.82175	0.95905	1.04965	0.989125	0.843125	0.83075	0.865725	1.14975	1.14007	1.14195
19	0.914375	0.829425	0.8423	0.985175	1.05222	1.0215	0.8758	0.85475	0.9005	1.18655	1.1954	1.19255
20	0.929925	0.850875	0.855675	1.00143	1.08395	1.025	0.8736	0.862775	0.91095	1.2276	1.23095	1.22628
21	0.948075	0.8639	0.8675	1.0217	1.10433	1.04323	0.887575	0.896625	0.940125	1.27865	1.27875	1.27175
22	0.94705	0.881825	0.8824	1.04703	1.12892	1.05492	0.9134	0.912925	0.955425	1.3152	1.31002	1.3011
23	0.96775	0.902675	0.897225	1.05577	1.13935	1.06997	0.94045	0.93605	0.978375	1.352	1.34848	1.33272
24	0.993525	0.90825	0.916825	1.07597	1.15305	1.08902	0.96225	0.95725	0.990925	1.39785	1.38265	1.3786
25	0.99305	0.91225	0.923775	1.09177	1.17395	1.10655	0.9663	0.9734	1.0261	1.43715	1.42578	1.4055
26	1.01527	0.938775	0.936275	1.11855	1.17765	1.10963	1.00565	0.9886	1.03317	1.46338	1.46608	1.4464
27	1.02995	0.944525	0.957825	1.13615	1.20257	1.14312	1.02032	1.001	1.05615	1.51277	1.51172	1.4698
28	1.04805	0.95665	0.961825	1.14253	1.21538	1.14505	1.04998	1.02165	1.07298	1.54705	1.52097	1.50353
29	1.04893	0.9791	0.969625	1.1547	1.22095	1.17425	1.0561	1.04167	1.09015	1.58282	1.55497	1.54038
30	1.06232	0.9841	0.982775	1.17182	1.23358	1.17542	1.08428	1.0697	1.1055	1.61645	1.58567	1.56105
31	1.06835	0.991375	1.00602	1.17505	1.24655	1.19325	1.0865	1.08727	1.13462	1.61807	1.62305	1.59525
32	1.08718	1.00273	1.01188	1.1962	1.25772	1.20372	1.11735	1.09545	1.12548	1.65938	1.6574	1.62492
33	1.09092	1.01295	1.01458	1.21355	1.2778	1.20522	1.1196	1.11367	1.16385	1.6954	1.69037	1.6501
34	1.09685	1.02705	1.03622	1.2192	1.2809	1.22422	1.15275	1.13875	1.18003	1.72138	1.70938	1.64993
35	1.11298	1.03422	1.03953	1.23022	1.29513	1.22863	1.16825	1.14885	1.1712	1.74905	1.73917	1.6933
36	1.1043	1.0509	1.05005	1.25235	1.31137	1.24253	1.18635	1.15885	1.20798	1.77915	1.77585	1.72802
37	1.1254	1.05485	1.06963	1.24442	1.32125	1.24337	1.20467	1.18588	1.20975	1.8027	1.79145	1.73877
38	1.1354	1.0634	1.07648	1.26402	1.32228	1.25155	1.22323	1.2076	1.2226	1.8205	1.82032	1.77287
39	1.15023	1.06573	1.0687	1.27157	1.34245	1.2673	1.24527	1.21285	1.24895	1.85367	1.839	1.78503
40	1.15945	1.08173	1.08195	1.2789	1.35373	1.28582	1.24067	1.2272	1.25622	1.84842	1.86833	1.80865
41	1.15997	1.09922	1.1127	1.27507	1.3549	1.29537	1.25412	1.24287	1.25515	1.88563	1.87793	1.82807
42	1.16585	1.10332	1.10763	1.2982	1.3675	1.28957	1.25477	1.25135	1.27523	1.90383	1.9127	1.84127
43	1.17233	1.10607	1.10357	1.30155	1.36505	1.3079	1.2815	1.27957	1.2993	1.93525	1.93755	1.8669
44	1.17455	1.10753	1.1222	1.32575	1.3781	1.30858	1.29935	1.28638	1.319	1.93745	1.95213	1.89365
45	1.18273	1.12427	1.11997	1.3264	1.39272	1.3204	1.31933	1.29458	1.31635	1.9664	1.96522	1.89275
46	1.19198	1.13508	1.13853	1.32763	1.3963	1.32545	1.321	1.31375	1.33817	1.97253	1.97358	1.9187
47	1.1928	1.13868	1.1473	1.34213	1.42073	1.33235	1.34007	1.31092	1.33718	2.0176	1.99578	1.9315
48	1.19505	1.12817	1.1444	1.34068	1.40718	1.34655	1.35187	1.33908	1.3527	2.0442	1.9957	1.95043
49	1.20067	1.14738	1.15023	1.34108	1.41568	1.3379	1.3642	1.34838	1.36947	2.0234	2.03613	1.97305
50	1.20198	1.14475	1.15155	1.37035	1.41532	1.35275	1.38495	1.35845	1.37795	2.0504	2.03575	1.98835
51	1.21775	1.14922	1.1646	1.3746	1.44372	1.36355	1.39362	1.37637	1.387	2.0658	2.06248	1.9929
52	1.22897	1.16075	1.17365	1.36995	1.4554	1.37088	1.40082	1.395	1.39925	2.06283	2.06272	2.01003
53	1.2342	1.1758	1.17565	1.3719	1.4551	1.35695	1.40843	1.39345	1.40653	2.1028	2.08775	2.01872
54	1.23172	1.18235	1.177	1.39455	1.45722	1.39912	1.42237	1.41033	1.41958	2.1257	2.10957	2.0223
55	1.23043	1.18735	1.19545	1.3878	1.44912	1.3958	1.4287	1.41807	1.42195	2.11897	2.10975	2.06902
56	1.2393	1.19003	1.2006	1.3761	1.45982	1.3895	1.44703	1.43483	1.42785	2.13393	2.1543	2.06548
57	1.23358	1.20625	1.19007	1.418	1.46643	1.4036	1.46047	1.4432	1.45823	2.16878	2.16012	2.06815
58	1.25165	1.20265	1.20598	1.417	1.46025	1.40948	1.4405	1.44375	1.45112	2.16043	2.1643	2.06515
59	1.2406	1.20687	1.21297	1.42075	1.47822	1.40035	1.47323	1.47412	1.47505	2.17598	2.17355	2.09877
60	1.2578	1.2034	1.20307	1.42027	1.47425	1.40225	1.47378	1.47398	1.48352	2.20065	2.18657	2.11413
61	1.26578	1.20873	1.20995	1.427	1.50073	1.41685	1.49305	1.48867	1.47327	2.22648	2.1929	2.1347
62	1.2655	1.2196	1.22103	1.42473	1.4851	1.43397	1.49485	1.49958	1.49832	2.22412	2.21342	2.11517
63	1.27215	1.22828	1.2251	1.43372	1.50945	1.41908	1.50832	1.5024	1.52595	2.2542	2.2362	2.1544
64	1.27062	1.2196	1.21742	1.4368	1.50785	1.42755	1.52145	1.50265	1.50735	2.23827	2.22725	2.16325
65	1.2659	1.22945	1.23998	1.45497	1.50515	1.43588	1.52287	1.5133	1.52792	2.26245	2.2546	2.16728
66	1.278	1.2268	1.23687	1.45457	1.50707	1.43575	1.5364	1.52347	1.53127	2.2723	2.27707	2.1738
67	1.27693	1.22505	1.24422	1.44815	1.51917	1.4409	1.5438	1.53855	1.54035	2.27845	2.2789	2.19615
68	1.28487	1.24998	1.2593	1.45423	1.5139	1.4369	1.54885	1.53998	1.5392	2.29425	2.2847	2.21667
69	1.28605	1.2579	1.24002	1.4869	1.51065	1.44627	1.57215	1.55625	1.5659	2.2967	2.3073	2.22487
70	1.30262	1.25788	1.25012	1.47412	1.52565	1.46093	1.5657	1.5403	1.5529	2.29865	2.29715	2.20277
71	1.3006	1.25497	1.25042	1.47245	1.5236	1.45445	1.58275	1.57078	1.55878	2.3148	2.32757	2.21778
72	1.30238	1.26418	1.26628	1.4756	1.5359	1.45233	1.58817	1.56862	1.57605	2.3126	2.33982	2.26297
73	1.3063	1.2592	1.27222	1.4842	1.53198	1.48608	1.5945	1.58207	1.57347	2.31703	2.34912	2.25
74	1.3318	1.2517	1.25028	1.48917	1.55208	1.48235	1.60125	1.59167	1.58963	2.3412	2.35113	2.27215
75	1.31717	1.2777	1.26953	1.48453	1.55755	1.46762	1.58977	1.5999	1.59425	2.3569	2.33215	2.27572
76	1.31377	1.28545	1.2743	1.50032	1.55688	1.4745	1.61587	1.61308	1.61292	2.3859	2.3775	2.2775
77	1.31488	1.26862	1.27485	1.5159	1.55525	1.46633	1.62098	1.61233	1.60397	2.36917	2.38273	2.30375
78	1.32357	1.27232	1.27673	1.50475	1.56275	1.49303	1.63755	1.61715	1.61712	2.38912	2.37557	2.29272
79	1.32912	1.29357	1.28218	1.5056	1.56605	1.48798	1.63447	1.62447	1.61377	2.39728	2.3953	2.30578
80	1.3341	1.28595	1.27045	1.51038	1.56727	1.496	1.6143	1.63345	1.62702	2.39283	2.39317	2.31502
81	1.3212	1.29242	1.28392	1.49713	1.57812	1.50435	1.65105	1.65138	1.64015	2.42395	2.38215	2.32978
82	1.33735	1.28665	1.28855	1.52067	1.55828	1.49222	1.65067	1.64977	1.65925	2.40925	2.42115	2.30255
83	1.33353	1.29103	1.28428	1.51775	1.55513	1.4966	1.6696	1.64995	1.6448	2.4304	2.41533	2.33542
84	1.34187	1.30307	1.29405	1.53947	1.55773	1.51372	1.67797	1.6589	1.66148	2.41748	2.42998	2.3438
85	1.3426	1.30675	1.29155	1.52087	1.57383	1.50392	1.66358	1.66253	1.63712	2.44453	2.44925	2.3466
86	1.33845	1.3141	1.28315	1.5269	1.56835	1.50547	1.68037	1.66027	1.65738	2.45213	2.44718	2.3565
87	1.34763	1.32088	1.30418	1.52815	1.56995	1.5126	1.67445	1.66045	1.66865	2.46395	2.46453	2.36035
88	1.35122	1.32763	1.29608	1.53675	1.57115	1.50925	1.69887	1.68998	1.67227	2.47535	2.44845	2.37933
89	1.34537	1.31252	1.29588	1.54085	1.5759	1.5228	1.71168	1.6839	1.67718	2.46157	2.45438	2.40555
90	1.36085	1.31753	1.32347	1.55075	1.58613	1.52008	1.7036	1.70897	1.68545	2.46773	2.46615	2.40198
91	1.3586	1.3096	1.311	1.54153	1.58937	1.53822	1.71382	1.69003	1.69703	2.47797	2.49535	2.40895
92	1.3394	1.32285	1.29545	1.55353	1.59593	1.523	1.72467	1.7163	1.71853	2.49772	2.48805	2.41007
93	1.35495	1.32325	1.3131	1.54523	1.59955	1.53398	1.7225	1.71182	1.70942	2.47582	2.5103	2.42855
94	1.36793	1.32365	1.30852	1.5484	1.59445	1.5386	1.72257	1.71915	1.72562	2.48667	2.49487	2.40785
95	1.359	1.33272	1.30123	1.5373	1.60565	1.531	1.72405	1.74205	1.72457	2.53125	2.50948	2.42745
96	1.35563	1.33302	1.31275	1.55655	1.5969	1.5414	1.73395	1.7221	1.7122	2.49518	2.51003	2.4179
97	1.35957	1.33413	1.3184	1.55743	1.60365	1.53175	1.75065	1.7373	1.7254	2.51792	2.51392	2.4415
98	1.36485	1.3316	1.33312	1.56025	1.59318	1.55785	1.74442	1.7435	1.73045	2.53368	2.5342	2.4512
99	1.36275	1.352	1.31533	1.55685	1.61102	1.53782	1.7503	1.74933	1.73975	2.51887	2.539	2.44112
100	1.3665	1.34112	1.3306	1.57835	1.6094	1.54297	1.7729	1.7598	1.73075	2.52855	2.56315	2.4559
