# Supplementary material for: Early steps of protein disaggregation by Hsp70 chaperone and class B J-domain proteins are shaped by Hsp110
Source: eLife. 2024 Oct 15;13:RP94795. doi: 10.7554/eLife.94795 (PMC11479587; doi:10.7554/eLife.94795)
Supplement: Figure 1—figure supplement 1—source data 2. [file elife-94795-fig1-figsupp1-data2.xlsx]

## Sheet: Figure 1—figure supplement 1B
	Ssa1, Sis1, Hsp104			Ssa1, Sis1, Sse1, Hsp104
Time (min)	Mean	SD	N	Mean	SD	N
0	0.000311765	4.0822e-05	3	0.000328235	5.40281e-05	3
5	0.0183569	0.0030014	3	0.184063	0.0588508	3
10	0.352661	0.133638	3	2.39138	0.541456	3
15	1.04992	0.187318	3	6.9659	1.91011	3
20	2.34331	0.837627	3	12.5744	2.49157	3
30	5.39413	1.16403	3	26.1321	4.69891	3
45	9.38757	0.354142	3	36.0946	3.72734	3
60	14.2547	1.79669	3	51.123	3.20779	3
75	22.3678	3.84551	3	63.6775	1.6928	3
90	25.2145	3.32578	3	71.8449	5.40957	3
105	29.0203	2.33133	3	81.4739	3.90983	3
120	31.3725	2.54815	3	87.6203	2.89594	3
