# Supplementary material for: Early steps of protein disaggregation by Hsp70 chaperone and class B J-domain proteins are shaped by Hsp110
Source: eLife. 2024 Oct 15;13:RP94795. doi: 10.7554/eLife.94795 (PMC11479587; doi:10.7554/eLife.94795)
Supplement: Figure 1—figure supplement 1—source data 3. [file elife-94795-fig1-figsupp1-data3.xlsx]

## Sheet: Figure 1—figure supplement 1C
Time (min)	Ssa1, Ydj1, Hsp104			Ssa1, Ydj1, Sse1, Hsp104			Ssa1, Sis1, Hsp104			Ssa1, Sis1, Sse1, Hsp104
1	1.19285	1.081	1.06707	1.19402	1.20792	1.11745	0.73715	0.707325	0.701675	0.748975	0.71185	0.654575
2	1.2782	1.15233	1.15413	1.31295	1.30288	1.22385	0.76285	0.7415	0.7118	0.7836	0.74725	0.6808
3	1.39275	1.25608	1.24782	1.46897	1.4289	1.37637	0.800225	0.76865	0.732675	0.867575	0.79925	0.731975
4	1.51883	1.3932	1.37485	1.63963	1.62567	1.5716	0.841925	0.804375	0.7792	0.9708	0.907775	0.827825
5	1.69857	1.5455	1.56682	1.86538	1.8574	1.79615	0.93345	0.8789	0.862525	1.1698	1.11425	1.01067
6	1.90585	1.72433	1.7544	2.1266	2.13833	2.0982	1.03872	0.970075	0.953575	1.4674	1.44093	1.27893
7	2.14027	1.944	1.9934	2.45975	2.47772	2.4733	1.18465	1.13345	1.12163	1.90997	1.96093	1.69817
8	2.43225	2.19105	2.24472	2.81413	2.87372	2.90002	1.36722	1.3333	1.33007	2.50937	2.71035	2.29508
9	2.7244	2.46695	2.56522	3.27895	3.3502	3.38485	1.63205	1.5873	1.58567	3.37772	3.77855	3.16255
10	3.05903	2.78993	2.88347	3.79723	3.87692	3.9179	1.93982	1.9507	1.93697	4.52485	5.15158	4.30032
11	3.4414	3.11425	3.26668	4.36322	4.47495	4.55575	2.33113	2.36528	2.33785	5.93355	6.95383	5.71943
12	3.83345	3.49898	3.6524	4.95338	5.11295	5.28525	2.7862	2.84547	2.8079	7.73508	9.10308	7.44623
13	4.23635	3.8886	4.09063	5.62333	5.80735	6.0003	3.3133	3.41233	3.35498	9.80745	11.6339	9.4927
14	4.69295	4.31072	4.53995	6.31075	6.54633	6.84433	3.879	4.05935	3.98583	12.2073	14.4836	11.7619
15	5.1217	4.73417	4.9918	7.05882	7.38927	7.66365	4.54745	4.7967	4.65665	14.8834	17.4324	14.2149
16	5.60217	5.1774	5.4902	7.83745	8.20947	8.59	5.2874	5.57653	5.40665	17.5521	20.5514	16.7797
17	6.0822	5.62178	5.95948	8.63198	9.06868	9.4842	6.04185	6.42825	6.20943	20.454	23.3949	19.2912
18	6.57185	6.099	6.42662	9.49072	9.9729	10.442	6.92462	7.34748	7.05085	23.3056	26.1563	21.9084
19	7.06625	6.5948	6.94358	10.401	10.9542	11.4444	7.75935	8.2536	7.95343	26.0521	28.8152	24.3441
20	7.56008	7.06375	7.4761	11.3209	11.8239	12.426	8.68207	9.22348	8.8276	28.6547	31.2472	26.7111
21	8.02368	7.55947	8.01238	12.2978	12.8401	13.4736	9.56295	10.1915	9.70733	31.2099	33.5926	28.8864
22	8.5484	8.04697	8.5051	13.2112	13.7967	14.4406	10.5259	11.2191	10.6817	33.5823	35.643	31.0314
23	9.03547	8.5211	9.04143	14.1761	14.7789	15.5119	11.4708	12.2244	11.5498	35.8611	37.6306	33.0414
24	9.52587	9.02325	9.5865	15.0845	15.7392	16.5464	12.4136	13.1432	12.5281	37.8637	39.4924	34.8832
25	10.0044	9.51265	10.0483	15.9821	16.7453	17.5356	13.3514	14.1085	13.4281	39.8031	41.1715	36.628
26	10.4581	9.96107	10.5541	16.8966	17.7451	18.4821	14.2993	15.0444	14.3088	41.606	42.8169	38.2083
27	10.9517	10.4535	11.0178	17.8326	18.6876	19.4972	15.1762	15.9337	15.1796	43.2319	44.1496	39.8195
28	11.3438	10.8693	11.5414	18.6936	19.674	20.4983	16.0482	16.8285	16.0456	44.7031	45.5762	41.1897
29	11.8465	11.3403	11.9954	19.562	20.6033	21.4298	16.914	17.7204	16.8773	46.2516	46.741	42.5343
30	12.2395	11.8495	12.4313	20.4238	21.519	22.3516	17.7387	18.6157	17.6498	47.4425	47.8415	43.7071
31	12.6919	12.1599	12.8863	21.3626	22.4193	23.2174	18.5611	19.4059	18.4611	48.6748	48.835	44.8021
32	13.1077	12.6412	13.3912	22.1072	23.2563	24.1434	19.2991	20.1378	19.1805	49.8484	49.7351	45.7425
33	13.4801	13.0433	13.8032	22.9819	24.1	25.0385	20.0328	20.964	19.9193	50.9071	50.6767	46.8148
34	13.9005	13.5196	14.217	23.7098	24.9737	25.8362	20.772	21.6491	20.5285	51.8749	51.562	47.7269
35	14.2719	13.8724	14.6386	24.57	25.7955	26.6712	21.494	22.2852	21.2281	52.6001	52.3298	48.5577
36	14.7047	14.2612	15.0171	25.3431	26.5	27.4809	22.1265	22.974	21.7643	53.4134	52.9622	49.4412
37	15.0436	14.6598	15.4154	26.0862	27.2834	28.2262	22.868	23.5311	22.4221	54.2733	53.7451	50.1077
38	15.3893	15.0527	15.8614	26.792	28.0564	28.9764	23.3826	24.1429	23.0195	54.979	54.2937	50.8376
39	15.7585	15.3881	16.2492	27.4639	28.7056	29.7997	23.9171	24.7375	23.602	55.6376	54.8728	51.4346
40	16.0908	15.7193	16.5661	28.2131	29.5151	30.4789	24.5105	25.3224	24.1049	56.2773	55.4607	52.0599
41	16.3665	16.0642	16.8756	28.849	30.2081	31.1401	25.0557	25.8559	24.5517	56.841	55.9907	52.5988
42	16.7278	16.3803	17.2975	29.4864	30.8264	31.7999	25.558	26.3827	25.1066	57.3788	56.3597	53.1799
43	17.1223	16.6798	17.6808	30.1896	31.5099	32.5219	26.1004	26.8553	25.5565	57.9958	56.8195	53.6271
44	17.3558	17.0487	17.9304	30.7641	32.1721	33.1042	26.5826	27.3063	26.0321	58.4472	57.3156	54.1409
45	17.6306	17.2024	18.2788	31.4171	32.7517	33.7486	27.0688	27.7991	26.4841	58.9823	57.7068	54.6942
46	17.9162	17.5986	18.5953	32.0182	33.3433	34.3415	27.4604	28.2322	26.8524	59.2112	57.9951	54.9734
47	18.2157	17.884	18.8628	32.572	33.8999	34.9527	27.8119	28.7064	27.3069	59.7435	58.2629	55.3174
48	18.3772	18.1486	19.194	33.0793	34.4695	35.4556	28.2604	28.9402	27.6371	60.05	58.7201	55.8158
49	18.7449	18.4623	19.4943	33.6427	34.928	36.067	28.6631	29.4429	28.0847	60.4838	59.0499	56.1857
50	18.979	18.7287	19.8014	34.1459	35.501	36.5256	29.0171	29.8734	28.44	60.7367	59.2689	56.4654
51	19.2315	18.9618	20.0182	34.6883	36.0721	37.0585	29.41	30.1851	28.8139	61.1006	59.7048	56.7845
52	19.4667	19.2231	20.3231	35.0897	36.5328	37.5669	29.7998	30.5178	29.1984	61.4181	59.9356	57.1187
53	19.6792	19.5236	20.5559	35.5691	37.0883	38.0736	30.1215	30.8737	29.455	61.6932	60.101	57.4254
54	19.9785	19.7057	20.8556	36.123	37.5496	38.6264	30.4454	31.1846	29.8522	61.8212	60.3821	57.5894
55	20.1289	19.9261	21.0633	36.5058	37.9554	38.9863	30.7442	31.394	30.1298	61.9762	60.4783	57.9858
56	20.3711	20.2013	21.286	37.0431	38.3154	39.4011	31.0506	31.8085	30.3876	62.3735	60.7139	58.4339
57	20.6241	20.4146	21.5557	37.3905	38.8721	39.8796	31.3255	32.1321	30.6761	62.5281	60.9378	58.4232
58	20.8161	20.6629	21.8059	37.7996	39.2625	40.3614	31.6773	32.413	30.9732	62.718	61.1469	58.8479
59	20.9709	20.8981	21.9471	38.2523	39.6339	40.7189	31.9769	32.6129	31.1877	62.9868	61.2222	58.9907
60	21.1988	21.0517	22.2014	38.6123	40.0984	41.1029	32.1701	32.9355	31.5351	63.1163	61.4095	59.2173
61	21.3435	21.2751	22.398	39.0724	40.4662	41.4575	32.3842	33.1946	31.8031	63.3715	61.5266	59.3605
62	21.552	21.5536	22.586	39.3809	40.7895	41.8238	32.7249	33.4126	31.9903	63.4603	61.7085	59.5945
63	21.7099	21.6532	22.7735	39.7766	41.2545	42.2366	32.8926	33.7208	32.2966	63.6971	61.7512	59.8194
64	21.8178	21.8158	22.9881	40.1325	41.5839	42.5557	33.1776	33.9528	32.4845	63.7125	61.9643	59.9094
65	21.9821	21.9802	23.1556	40.5051	41.9365	42.8746	33.3477	34.122	32.7452	63.9117	62.0112	60.0939
66	22.2092	22.1841	23.3545	40.7534	42.2565	43.1091	33.6316	34.3954	32.9206	64.1642	62.134	60.2361
67	22.3278	22.3827	23.5658	41.0814	42.6484	43.5107	33.8691	34.5475	33.2312	64.2457	62.3774	60.3742
68	22.4518	22.6147	23.6556	41.3717	42.8556	43.8197	34.0644	34.7751	33.3896	64.2783	62.387	60.599
69	22.592	22.6842	23.8694	41.6615	43.1921	44.0446	34.2345	35.0564	33.6394	64.4757	62.5484	60.57
70	22.7678	22.8614	24.0376	42.0856	43.3879	44.3819	34.5047	35.1879	33.8331	64.4731	62.5232	60.8972
71	22.9141	23.0348	24.2441	42.3365	43.7908	44.6574	34.636	35.424	34.0067	64.5487	62.5309	61.0489
72	23.0406	23.1384	24.3712	42.6368	44.0239	44.9558	34.8731	35.6183	34.1463	64.7095	62.783	61.1221
73	23.2014	23.3192	24.4706	42.8974	44.2504	45.1958	35.0271	35.767	34.3469	64.7952	62.6842	61.3195
74	23.2934	23.4176	24.6555	43.1487	44.6709	45.4668	35.2022	35.8947	34.5047	64.8132	62.8542	61.251
75	23.4171	23.6129	24.6798	43.4084	44.8105	45.7456	35.3689	36.1673	34.7861	64.9671	62.8586	61.2912
76	23.5658	23.7871	24.8749	43.7766	45.0941	45.9197	35.5384	36.2608	34.8243	64.9955	62.9777	61.5393
77	23.6664	23.8479	25.0142	43.8953	45.2844	46.2254	35.7073	36.4316	35.0344	65.0832	63.0661	61.4738
78	23.7626	24.0113	25.1517	44.2105	45.5831	46.3557	35.8485	36.4937	35.1722	65.0451	63.1553	61.5793
79	23.9113	24.1301	25.2526	44.4308	45.8005	46.6107	35.9777	36.7381	35.3228	65.313	63.2441	61.7439
80	24.0134	24.2455	25.4659	44.5836	45.9329	46.8685	36.0305	36.8166	35.5125	65.279	63.2724	61.8137
81	24.0275	24.3793	25.5084	44.7476	46.1555	47.0338	36.3036	36.9447	35.6155	65.3107	63.355	61.9066
82	24.2303	24.4853	25.6361	45.0634	46.3171	47.2691	36.3802	37.2268	35.8009	65.332	63.3254	61.8559
83	24.2575	24.676	25.7264	45.2743	46.6053	47.3034	36.566	37.2493	35.8537	65.411	63.3912	61.9536
84	24.3737	24.7284	25.8241	45.4131	46.7654	47.5119	36.6543	37.3962	35.9809	65.3838	63.3595	62.1381
85	24.4881	24.7898	25.878	45.7118	47.0046	47.8083	36.846	37.5472	36.1591	65.499	63.4964	62.2497
86	24.5868	24.9472	26.0593	45.8651	47.2004	47.9813	36.9413	37.639	36.226	65.579	63.3924	62.2354
87	24.5868	25.0656	26.1871	46.0866	47.3429	48.0855	37.1234	37.7127	36.4036	65.5554	63.4531	62.3529
88	24.6859	25.1528	26.2153	46.2094	47.6327	48.2874	37.1462	37.8939	36.5305	65.5327	63.5851	62.3286
89	24.7196	25.2069	26.2878	46.4171	47.669	48.5179	37.2766	38.0348	36.6035	65.5852	63.5077	62.3069
90	24.8179	25.3013	26.4138	46.5111	47.8118	48.6403	37.4607	38.1386	36.7507	65.7232	63.5558	62.4327
91	24.9351	25.467	26.4891	46.712	48.0523	48.6966	37.5772	38.1925	36.7719	65.7489	63.6011	62.485
92	24.9524	25.4885	26.5749	46.9154	48.1998	48.9438	37.635	38.2571	36.9758	65.7012	63.649	62.4859
93	24.9969	25.5325	26.6642	47.0038	48.3912	48.9755	37.6647	38.4099	36.9405	65.6767	63.6418	62.5775
94	25.1247	25.6708	26.7543	47.1742	48.4719	49.1054	37.7558	38.543	37.1042	65.7638	63.6247	62.4424
95	25.1358	25.8165	26.8374	47.3358	48.7101	49.3407	37.8927	38.5388	37.1945	65.667	63.5969	62.6136
96	25.2184	25.8374	26.951	47.4931	48.6756	49.3756	37.9656	38.7416	37.3487	65.888	63.6181	62.6509
97	25.2748	25.8686	26.9353	47.6752	48.8963	49.4817	38.0312	38.6945	37.4338	65.7477	63.665	62.6614
98	25.2967	25.9846	27.0488	47.7213	49.0237	49.6927	38.1294	38.8944	37.5699	65.7358	63.6427	62.7847
99	25.332	26.0025	27.0301	47.8974	49.1297	49.7695	38.2036	38.9428	37.6129	65.734	63.5622	62.6546
100	25.4005	26.1404	27.1398	48.002	49.2043	49.9702	38.2162	39.0274	37.6996	65.7672	63.5578	62.669
