# Supplementary material for: Early steps of protein disaggregation by Hsp70 chaperone and class B J-domain proteins are shaped by Hsp110
Source: eLife. 2024 Oct 15;13:RP94795. doi: 10.7554/eLife.94795 (PMC11479587; doi:10.7554/eLife.94795)
Supplement: Figure 1—figure supplement 1—source data 4. [file elife-94795-fig1-figsupp1-data4.xlsx]

## Sheet: Figure 1—figure supplement 1D
	Spont Luc			Sse1			Ssa1, Ydj1			Ssa1, Ydj1, Sse1			Ssa1, Sis1			Ssa1, Sis1, Sse1
Time (min)	Mean	SD	N	Mean	SD	N	Mean	SD	N	Mean	SD	N	Mean	SD	N	Mean	SD	N
0	0.00416111	0.00157643	3	0.00542541	0.00408207	3	0.00230393	0.000445634	3	0.00324748	0.000735692	3	0.00314674	0.000202956	3	0.00296	0.00028753	3
10	3.52363	0.1396	3	3.52398	0.172901	3	20.6176	3.36266	3	20.6815	1.47098	3	3.81594	0.498555	3	4.97001	0.651638	3
20	7.00162	0.58499	3	7.06519	1.72964	3	39.7895	7.30039	3	40.6232	4.28105	3	8.71272	0.758688	3	11.0499	0.774524	3
30	9.29745	1.93233	3	9.65205	1.16321	3	54.2251	6.24934	3	48.4669	4.64462	3	14.228	1.59354	3	17.5474	0.257723	3
45	12.5543	1.5227	3	13.923	1.42928	3	69.4278	5.40386	3	57.1078	0.865936	3	19.2181	1.51778	3	21.7743	0.967617	3
60	14.982	1.94055	3	15.222	2.36382	3	75.607	2.60536	3	60.5137	1.42305	3	24.3916	3.73074	3	28.2179	4.03003	3
90	16.8503	0.288002	3	15.9333	0.798521	3	80.5864	2.53963	3	67.7355	4.15012	3	34.242	0.504138	3	36.2816	2.12106	3
120	18.0888	0.688803	3	18.237	0.89679	3	86.2871	3.03145	3	73.6927	5.42708	3	41.2507	3.5489	3	41.5031	2.16519	3
