# Supplementary material for: Early steps of protein disaggregation by Hsp70 chaperone and class B J-domain proteins are shaped by Hsp110
Source: eLife. 2024 Oct 15;13:RP94795. doi: 10.7554/eLife.94795 (PMC11479587; doi:10.7554/eLife.94795)
Supplement: Figure 1—figure supplement 1—source data 5. [file elife-94795-fig1-figsupp1-data5.xlsx]

## Sheet: Figure 1—figure supplement 1E
	replicate 1						replicate 2
Time (min)	Sis1, Ssa1	Sis1, Ssa1, 0,1uM Sse1	Ydj1, Ssa1	Ydj1, Ssa1, 0,1uM Sse1			Sis1, Ssa1	Sis1, Ssa1, 0,1uM Sse1	Ydj1, Ssa1	Ydj1, Ssa1, 0,1uM Sse1
0	0	0	0	0		0	0	0	0	0
0.00333333	-0.00642	9.38e-05	0.006279	0.001931		0.00333333	0.00445875	-0.00293344	0.00245748	-0.00255421
0.00666667	-0.00865	0.001639	0.004716	-1.8e-05		0.00666667	0.00121185	-0.00365841	0.00291583	-0.000274292
0.01	-0.01273	0.002478	0.000849	0.000134		0.01	-0.00187844	-0.00623911	0.00309216	-0.000749929
0.0133333	-0.01407	0.002782	0.000906	-0.00152		0.0133333	-0.00443856	-0.00830486	0.00344007	-0.00314386
0.0166667	-0.01513	0.00259	-0.00184	-0.00275		0.0166667	-0.0069105	-0.01065	0.00285323	-0.00418897
0.02	-0.01457	0.001279	-0.00322	-0.0041		0.02	-0.00929212	-0.0109007	-0.000280669	-0.00453337
0.0233333	-0.01565	0.001133	-0.00157	-0.00265		0.0233333	-0.00895408	-0.0132867	-0.00256816	-0.00744422
0.0266667	-0.01558	-0.00055	0.000951	-0.00424		0.0266667	-0.00785673	-0.0147616	-0.00563569	-0.00916314
0.03	-0.01636	-0.00073	0.002528	-0.00311		0.03	-0.00884388	-0.0138049	-0.0100684	-0.00830047
0.0333333	-0.01803	0.000369	0.004636	-0.0031		0.0333333	-0.00974083	-0.0146879	-0.0151489	-0.0112219
0.0366667	-0.02021	0.000941	0.003311	-0.00311		0.0366667	-0.0114291	-0.0160402	-0.0194245	-0.0110228
0.04	-0.0214	0.001561	0.002515	-0.00407		0.04	-0.0136456	-0.0174392	-0.0261062	-0.0121732
0.0433333	-0.02245	0.002255	-0.0002	-0.00233		0.0433333	-0.015156	-0.0190985	-0.0311247	-0.010756
0.0466667	-0.02338	0.00064	-0.00285	-0.00199		0.0466667	-0.0168384	-0.0220644	-0.0325469	-0.013651
0.05	-0.02513	-0.00065	-0.00379	-0.00135		0.05	-0.0172403	-0.0244557	-0.0287265	-0.012251
0.0533333	-0.02516	0.001672	-0.00546	-0.00017		0.0533333	-0.0179396	-0.0286161	-0.0225371	-0.0164856
0.0566667	-0.02643	0.001738	-0.00781	-0.00197		0.0566667	-0.018545	-0.0280078	-0.0155916	-0.0176722
0.06	-0.02704	0.003618	-0.0078	-0.00334		0.06	-0.0208677	-0.0273691	-0.0114921	-0.021555
0.0633333	-0.02865	0.005759	-0.00819	-0.00481		0.0633333	-0.0217787	-0.0273416	-0.0124413	-0.0214598
0.0666667	-0.02847	0.005583	-0.01052	-0.00623		0.0666667	-0.0227525	-0.0274047	-0.0180395	-0.0224449
0.07	-0.02919	0.004261	-0.01036	-0.00982		0.07	-0.0241731	-0.0257573	-0.0278118	-0.0216098
0.0733333	-0.03084	0.003236	-0.01113	-0.00881		0.0733333	-0.0241773	-0.026209	-0.0350811	-0.0207822
0.0766667	-0.03156	0.001089	-0.01086	-0.00941		0.0766667	-0.0238137	-0.0264016	-0.0340756	-0.0232724
0.08	-0.03254	-0.0005	-0.01265	-0.00931		0.08	-0.0227128	-0.0294747	-0.0283133	-0.0241501
0.0833333	-0.03222	0.001065	-0.01225	-0.01063		0.0833333	-0.024247	-0.027763	-0.0252337	-0.0258621
0.0866667	-0.0344	0.001053	-0.01446	-0.00716		0.0866667	-0.024573	-0.0301962	-0.0227587	-0.0265419
0.09	-0.03541	0.000815	-0.0158	-0.00858		0.09	-0.0261512	-0.0295678	-0.0224422	-0.0294118
0.0933333	-0.03546	0.002561	-0.01762	-0.00902		0.0933333	-0.0281436	-0.0324572	-0.0304276	-0.0283385
0.0966667	-0.03713	0.003562	-0.02104	-0.00832		0.0966667	-0.0294594	-0.0304606	-0.0342006	-0.0294316
0.1	-0.03814	0.001652	-0.0211	-0.008		0.1	-0.0291373	-0.0351575	-0.0322603	-0.0320688
0.103333	-0.03759	0.000655	-0.01991	-0.01139		0.103333	-0.0305095	-0.0330604	-0.03165	-0.0320832
0.106667	-0.03674	0.000617	-0.01775	-0.01128		0.106667	-0.029796	-0.0350275	-0.0316041	-0.034217
0.11	-0.03756	0.000146	-0.01651	-0.0105		0.11	-0.0300404	-0.0344554	-0.0309764	-0.0347345
0.113333	-0.03676	-0.00063	-0.01413	-0.01292		0.113333	-0.0313409	-0.0357273	-0.0332033	-0.0355835
0.116667	-0.03797	-0.00096	-0.0146	-0.0122		0.116667	-0.0329738	-0.0338594	-0.0337394	-0.0351513
0.12	-0.03906	-0.00091	-0.01639	-0.01072		0.12	-0.0340269	-0.0351475	-0.0337776	-0.0368332
0.123333	-0.04056	-0.00114	-0.01765	-0.01082		0.123333	-0.0367041	-0.0371279	-0.0346917	-0.0357338
0.126667	-0.04234	-0.00219	-0.02177	-0.01071		0.126667	-0.0383652	-0.0359144	-0.0360676	-0.0367866
0.13	-0.04291	-0.00287	-0.02036	-0.00913		0.13	-0.0383454	-0.0362313	-0.0339695	-0.0379197
0.133333	-0.04398	-0.00437	-0.02139	-0.00992		0.133333	-0.0391704	-0.0349072	-0.0355676	-0.0391345
0.136667	-0.04543	-0.00453	-0.02151	-0.00874		0.136667	-0.0395521	-0.0356659	-0.0367165	-0.0403194
0.14	-0.04562	-0.00619	-0.02234	-0.00958		0.14	-0.0411818	-0.0350811	-0.0382142	-0.0416341
0.143333	-0.04744	-0.00797	-0.0209	-0.01107		0.143333	-0.0414355	-0.037568	-0.0373016	-0.0422872
0.146667	-0.04796	-0.00752	-0.02219	-0.01175		0.146667	-0.0432726	-0.0380424	-0.0362178	-0.0422772
0.15	-0.04984	-0.00678	-0.02245	-0.01189		0.15	-0.0439851	-0.0407545	-0.0393271	-0.0423512
0.153333	-0.04835	-0.00598	-0.02385	-0.01592		0.153333	-0.0448305	-0.0414255	-0.0410451	-0.0422997
0.156667	-0.04997	-0.00363	-0.02595	-0.01497		0.156667	-0.0449005	-0.0427182	-0.0418791	-0.0430879
0.16	-0.05035	-0.00042	-0.02878	-0.01468		0.16	-0.0449806	-0.0450149	-0.03762	-0.0434047
0.163333	-0.05179	-0.00075	-0.03216	-0.01547		0.163333	-0.0452107	-0.047066	-0.039493	-0.0442321
0.166667	-0.05038	0.000626	-0.03284	-0.01545		0.166667	-0.0454892	-0.0479642	-0.0437866	-0.0452293
0.17	-0.05286	-0.00125	-0.03366	-0.0135		0.17	-0.0451495	-0.0481857	-0.0476982	-0.0467378
0.173333	-0.0512	-0.00333	-0.03416	-0.01268		0.173333	-0.0445895	-0.0481706	-0.0434273	-0.0467077
0.176667	-0.05026	-0.00532	-0.03074	-0.01251		0.176667	-0.044972	-0.0474245	-0.0421245	-0.0481183
0.18	-0.05022	-0.00506	-0.03147	-0.01198		0.18	-0.0443285	-0.0477749	-0.0478475	-0.0475844
0.183333	-0.05143	-0.00475	-0.03284	-0.01146		0.183333	-0.0448241	-0.047426	-0.048469	-0.0486951
0.186667	-0.05289	-0.00376	-0.02997	-0.01159		0.186667	-0.0456301	-0.0485448	-0.0431356	-0.0493589
0.19	-0.05525	-0.00389	-0.03026	-0.01299		0.19	-0.0470377	-0.0508633	-0.0432214	-0.0481427
0.193333	-0.05543	-0.00332	-0.03272	-0.01362		0.193333	-0.0468204	-0.0507841	-0.0498197	-0.0516182
0.196667	-0.05661	-0.00382	-0.03261	-0.01317		0.196667	-0.0472984	-0.0511262	-0.0530758	-0.0537224
0.2	-0.05759	-0.00442	-0.03251	-0.01488		0.2	-0.0470309	-0.0532067	-0.0470242	-0.0536677
0.203333	-0.05895	-0.00467	-0.03552	-0.01526		0.203333	-0.0471605	-0.0523997	-0.0473898	-0.0545832
0.206667	-0.06048	-0.00519	-0.03488	-0.01553		0.206667	-0.0465706	-0.0529491	-0.0526119	-0.0543655
0.21	-0.06168	-0.00709	-0.03504	-0.01647		0.21	-0.0468856	-0.0553734	-0.0535488	-0.0544761
0.213333	-0.06409	-0.00651	-0.03501	-0.01659		0.213333	-0.0469206	-0.0547132	-0.0461948	-0.0551107
0.216667	-0.06528	-0.00694	-0.03558	-0.01587		0.216667	-0.0465548	-0.0549987	-0.0510538	-0.0550943
0.22	-0.0649	-0.007	-0.03497	-0.01625		0.22	-0.0465543	-0.0579252	-0.0576424	-0.056727
0.223333	-0.06538	-0.00662	-0.03693	-0.01545		0.223333	-0.0459544	-0.0589531	-0.0533795	-0.059351
0.226667	-0.0679	-0.00757	-0.03896	-0.01397		0.226667	-0.0470671	-0.059142	-0.0491979	-0.0585077
0.23	-0.06665	-0.00656	-0.04004	-0.01602		0.23	-0.0486822	-0.0610129	-0.0558532	-0.0605183
0.233333	-0.06708	-0.00613	-0.04164	-0.01624		0.233333	-0.0497372	-0.0611208	-0.0582044	-0.0591455
0.236667	-0.06579	-0.00552	-0.04238	-0.01615		0.236667	-0.049821	-0.0576552	-0.0501007	-0.0601514
0.24	-0.06767	-0.00535	-0.04334	-0.01584		0.24	-0.0509256	-0.0558255	-0.0546296	-0.0611535
0.243333	-0.06758	-0.00364	-0.04343	-0.01593		0.243333	-0.0522206	-0.0567681	-0.0611435	-0.0621782
0.246667	-0.0683	-0.00418	-0.04534	-0.01502		0.246667	-0.0511383	-0.0574189	-0.0539062	-0.063937
0.25	-0.06749	-0.00337	-0.04507	-0.01497		0.25	-0.0508309	-0.0570308	-0.0513933	-0.0661878
0.253333	-0.07117	-0.00325	-0.04532	-0.01511		0.253333	-0.0524778	-0.0615258	-0.059223	-0.066333
0.256667	-0.07275	-0.00296	-0.04373	-0.01652		0.256667	-0.0536873	-0.0631769	-0.0555019	-0.0673069
0.26	-0.07527	-0.00292	-0.04279	-0.01753		0.26	-0.0544843	-0.0606638	-0.0508513	-0.0664661
0.263333	-0.07674	-0.00366	-0.04193	-0.01803		0.263333	-0.0560089	-0.0609896	-0.0607474	-0.0672876
0.266667	-0.07947	-0.00466	-0.04352	-0.01923		0.266667	-0.0588463	-0.0619706	-0.0582894	-0.0677317
0.27	-0.07763	-0.00586	-0.04442	-0.01998		0.27	-0.0590131	-0.0611042	-0.0536392	-0.0679343
0.273333	-0.07749	-0.00708	-0.0479	-0.01995		0.273333	-0.0592506	-0.0608617	-0.0615288	-0.070492
0.276667	-0.07473	-0.00628	-0.0512	-0.02014		0.276667	-0.0595805	-0.0629656	-0.0628578	-0.0712182
0.28	-0.07551	-0.00773	-0.05292	-0.0202		0.28	-0.0604099	-0.0618244	-0.0572076	-0.0707578
0.283333	-0.07549	-0.00794	-0.05422	-0.019		0.283333	-0.0593867	-0.0627886	-0.0637198	-0.0741766
0.286667	-0.07766	-0.00805	-0.05781	-0.01973		0.286667	-0.0610465	-0.0653089	-0.0651041	-0.0737914
0.29	-0.08006	-0.00718	-0.05822	-0.01848		0.29	-0.0620208	-0.066866	-0.0593097	-0.0748573
0.293333	-0.08109	-0.00854	-0.0569	-0.01854		0.293333	-0.0610881	-0.0691974	-0.0635719	-0.0769257
0.296667	-0.08187	-0.00682	-0.05666	-0.01974		0.296667	-0.0620089	-0.0736686	-0.0668133	-0.0761713
0.3	-0.08344	-0.00784	-0.05578	-0.02215		0.3	-0.062938	-0.0752137	-0.0611367	-0.0769125
0.303333	-0.08337	-0.00851	-0.05401	-0.01925		0.303333	-0.0626587	-0.0744975	-0.0646531	-0.0774468
0.306667	-0.07983	-0.00911	-0.05151	-0.02144		0.306667	-0.0644923	-0.0762279	-0.069597	-0.0746142
0.31	-0.0809	-0.00877	-0.05002	-0.02171		0.31	-0.065766	-0.0759901	-0.0630562	-0.0753823
0.313333	-0.08131	-0.01106	-0.04946	-0.02147		0.313333	-0.0666728	-0.074423	-0.0643876	-0.0781108
0.316667	-0.08075	-0.01083	-0.0494	-0.02006		0.316667	-0.0681715	-0.0764352	-0.069551	-0.0761815
0.32	-0.08294	-0.01151	-0.05041	-0.0223		0.32	-0.067789	-0.0787852	-0.0635865	-0.0794894
0.323333	-0.08597	-0.0113	-0.05428	-0.02187		0.323333	-0.0662032	-0.0804304	-0.0643373	-0.0820143
0.326667	-0.08724	-0.01149	-0.05541	-0.02245		0.326667	-0.0671182	-0.0811931	-0.0708369	-0.0808202
0.33	-0.08756	-0.0108	-0.05744	-0.02125		0.33	-0.0669363	-0.0827341	-0.0659467	-0.0823984
0.333333	-0.08889	-0.01099	-0.06183	-0.02149		0.333333	-0.0669305	-0.0841097	-0.0694335	-0.0833028
0.336667	-0.08717	-0.01058	-0.06105	-0.02178		0.336667	-0.0689657	-0.0859522	-0.0751951	-0.0809808
0.34	-0.08764	-0.0105	-0.06009	-0.0213		0.34	-0.0706681	-0.0856961	-0.0702248	-0.0839731
0.343333	-0.08828	-0.00983	-0.06145	-0.02208		0.343333	-0.0725174	-0.0874607	-0.0719685	-0.0846381
0.346667	-0.08864	-0.00962	-0.06219	-0.0233		0.346667	-0.0737199	-0.0890231	-0.0774875	-0.0818485
0.35	-0.08887	-0.00986	-0.06104	-0.02299		0.35	-0.0741619	-0.0882319	-0.071587	-0.0852247
0.353333	-0.0903	-0.01108	-0.06142	-0.02129		0.353333	-0.0743516	-0.0872409	-0.07276	-0.0881653
0.356667	-0.08901	-0.0111	-0.06242	-0.02009		0.356667	-0.0747876	-0.0888204	-0.0760961	-0.0849107
0.36	-0.09031	-0.013	-0.06196	-0.01949		0.36	-0.0737688	-0.0890692	-0.0715326	-0.0879603
0.363333	-0.08915	-0.01195	-0.06208	-0.01886		0.363333	-0.0738297	-0.0889999	-0.0749371	-0.0905896
0.366667	-0.08998	-0.01171	-0.06011	-0.01899		0.366667	-0.0746438	-0.0906706	-0.0751005	-0.0881126
0.37	-0.09016	-0.00922	-0.06093	-0.02003		0.37	-0.0745374	-0.09199	-0.0734131	-0.088621
0.373333	-0.09245	-0.00989	-0.06141	-0.02039		0.373333	-0.0747102	-0.092151	-0.0779018	-0.0906999
0.376667	-0.09287	-0.00918	-0.06204	-0.0193		0.376667	-0.074789	-0.0933152	-0.0759688	-0.0883007
0.38	-0.09571	-0.01103	-0.06189	-0.01984		0.38	-0.0758966	-0.096046	-0.0727881	-0.0912472
0.383333	-0.09703	-0.0103	-0.06336	-0.02056		0.383333	-0.0763995	-0.0952762	-0.0791644	-0.0945623
0.386667	-0.0984	-0.01125	-0.06572	-0.02083		0.386667	-0.0769482	-0.0970927	-0.0758286	-0.094656
0.39	-0.09772	-0.01091	-0.06442	-0.0224		0.39	-0.077517	-0.0973249	-0.0742839	-0.0953164
0.393333	-0.09854	-0.01183	-0.06573	-0.02298		0.393333	-0.0793504	-0.096313	-0.082626	-0.099156
0.396667	-0.09774	-0.01317	-0.06674	-0.0237		0.396667	-0.0788796	-0.096989	-0.0784011	-0.0977444
0.4	-0.09746	-0.01534	-0.06725	-0.02321		0.4	-0.0797675	-0.0991741	-0.0775784	-0.0958814
0.403333	-0.09848	-0.01582	-0.06697	-0.02265		0.403333	-0.0804377	-0.0976781	-0.0842949	-0.0983418
0.406667	-0.10208	-0.0169	-0.07024	-0.02286		0.406667	-0.0810082	-0.099385	-0.0795886	-0.098618
0.41	-0.10077	-0.01726	-0.07215	-0.02201		0.41	-0.0805665	-0.101341	-0.0801031	-0.0962478
0.413333	-0.10324	-0.01389	-0.07329	-0.02198		0.413333	-0.0816291	-0.0998982	-0.0830157	-0.0975403
0.416667	-0.10301	-0.01314	-0.07674	-0.0218		0.416667	-0.0809945	-0.100102	-0.0814907	-0.0999785
0.42	-0.10317	-0.01522	-0.07771	-0.02315		0.42	-0.081115	-0.101277	-0.0834437	-0.0986312
0.423333	-0.10066	-0.01471	-0.07707	-0.02382		0.423333	-0.082312	-0.102105	-0.0830531	-0.0986894
0.426667	-0.10172	-0.01469	-0.07919	-0.02438		0.426667	-0.0828648	-0.102656	-0.0802048	-0.101841
0.43	-0.10045	-0.01702	-0.07701	-0.02431		0.43	-0.0836949	-0.103668	-0.0836467	-0.103042
0.433333	-0.1015	-0.01873	-0.07573	-0.02546		0.433333	-0.0855504	-0.104191	-0.0799963	-0.101273
0.436667	-0.10172	-0.01901	-0.07653	-0.02549		0.436667	-0.0873564	-0.10552	-0.0795027	-0.103494
0.44	-0.10254	-0.02006	-0.07842	-0.02358		0.44	-0.084981	-0.106277	-0.0823029	-0.105204
0.443333	-0.10291	-0.01866	-0.07453	-0.02464		0.443333	-0.0848853	-0.105801	-0.0808203	-0.103938
0.446667	-0.10442	-0.01867	-0.07621	-0.0233		0.446667	-0.0853745	-0.1061	-0.082797	-0.102001
0.45	-0.10542	-0.01862	-0.07534	-0.02297		0.45	-0.0846152	-0.107481	-0.0839211	-0.1063
0.453333	-0.10691	-0.01915	-0.075	-0.02327		0.453333	-0.0846323	-0.108798	-0.0831689	-0.105877
0.456667	-0.10667	-0.01791	-0.07415	-0.02514		0.456667	-0.0862942	-0.108437	-0.0870743	-0.10557
0.46	-0.11006	-0.01824	-0.07631	-0.02447		0.46	-0.0879281	-0.110163	-0.0855355	-0.107897
0.463333	-0.11014	-0.01903	-0.07732	-0.02561		0.463333	-0.0861909	-0.11103	-0.086195	-0.111776
0.466667	-0.11151	-0.02014	-0.07756	-0.02454		0.466667	-0.0855917	-0.111204	-0.0860998	-0.108995
0.47	-0.11166	-0.01771	-0.07824	-0.02481		0.47	-0.0852635	-0.110301	-0.0845882	-0.106956
0.473333	-0.11484	-0.01943	-0.08046	-0.02358		0.473333	-0.0865032	-0.110109	-0.0858487	-0.110647
0.476667	-0.112	-0.0209	-0.08213	-0.02531		0.476667	-0.0865895	-0.109803	-0.0855271	-0.112222
0.48	-0.11272	-0.02222	-0.08113	-0.02463		0.48	-0.0881345	-0.109838	-0.0857992	-0.110807
0.483333	-0.11176	-0.02013	-0.08128	-0.02509		0.483333	-0.0905685	-0.109336	-0.0908676	-0.112819
0.486667	-0.11305	-0.0228	-0.08054	-0.02365		0.486667	-0.0924484	-0.110488	-0.0897129	-0.117318
0.49	-0.1122	-0.02551	-0.07934	-0.0233		0.49	-0.0931647	-0.112692	-0.0916697	-0.115876
0.493333	-0.1135	-0.0253	-0.07909	-0.02131		0.493333	-0.0936983	-0.114831	-0.0925343	-0.113396
0.496667	-0.113	-0.02407	-0.0789	-0.02183		0.496667	-0.094406	-0.115887	-0.0926469	-0.114569
0.5	-0.03205	0.217888	-0.0455	0.115987		0.5	0.0149455	-0.0745355	-0.0226358	-0.125996
0.503333	-0.02072	0.235298	-0.05559	0.120853		0.503333	0.0184042	-0.0721205	-0.0263779	-0.133
0.506667	-0.0224	0.243867	-0.04513	0.130985		0.506667	0.0209253	-0.0736114	-0.038702	-0.122805
0.51	-0.01392	0.239709	-0.03567	0.141299		0.51	0.0335723	-0.0634917	-0.0327481	-0.114219
0.513333	-0.01322	0.244486	-0.03171	0.137547		0.513333	0.0354371	-0.0685166	-0.0204694	-0.107376
0.516667	-0.0109	0.248062	-0.03027	0.139892		0.516667	0.0400823	-0.0675279	-0.0225142	-0.101599
0.52	-0.01029	0.248883	-0.02332	0.141814		0.52	0.0452429	-0.0681002	-0.0237537	-0.0934202
0.523333	-0.00962	0.246107	-0.02123	0.138809		0.523333	0.0477617	-0.0684106	-0.0158329	-0.0877833
0.526667	-0.01102	0.248188	-0.01943	0.135956		0.526667	0.0461515	-0.0729091	-0.0122944	-0.08391
0.53	-0.01248	0.24643	-0.0172	0.136158		0.53	0.0460947	-0.0740692	-0.0133961	-0.0799351
0.533333	-0.01221	0.247797	-0.01444	0.139348		0.533333	0.0488992	-0.0739953	-0.00834867	-0.0771331
0.536667	-0.0143	0.246601	-0.01393	0.140373		0.536667	0.047696	-0.0717032	-0.00234533	-0.0744978
0.54	-0.01307	0.247981	-0.0099	0.141599		0.54	0.0498917	-0.0715565	-0.00417216	-0.0709158
0.543333	-0.01476	0.245991	-0.00841	0.139485		0.543333	0.0530688	-0.0680168	-0.000147817	-0.067241
0.546667	-0.01386	0.246336	-0.00844	0.139268		0.546667	0.0535787	-0.0668688	0.0024985	-0.0639703
0.55	-0.01356	0.245377	-0.00543	0.137288		0.55	0.0539124	-0.0670313	0.00261285	-0.0596383
0.553333	-0.01275	0.244054	-0.0024	0.135021		0.553333	0.0564798	-0.0681039	0.0051432	-0.0564698
0.556667	-0.01492	0.242696	-0.00322	0.134989		0.556667	0.0563187	-0.0663194	0.00586219	-0.0557363
0.56	-0.01322	0.241753	-0.00235	0.137226		0.56	0.0588582	-0.0660454	0.00745564	-0.0528529
0.563333	-0.01507	0.24082	0.002265	0.13671		0.563333	0.063156	-0.063932	0.00893923	-0.049428
0.566667	-0.01653	0.240144	0.003507	0.137364		0.566667	0.0635475	-0.0618917	0.0124811	-0.0496403
0.57	-0.01688	0.240438	0.00532	0.137641		0.57	0.0626837	-0.060153	0.0149924	-0.0469027
0.573333	-0.0162	0.240453	0.005945	0.141937		0.573333	0.0652044	-0.0605943	0.017631	-0.0433201
0.576667	-0.01804	0.240824	0.011231	0.144466		0.576667	0.0634895	-0.0603844	0.0191263	-0.040773
0.58	-0.01699	0.240911	0.011743	0.147701		0.58	0.0621782	-0.0589744	0.0200075	-0.038812
0.583333	-0.01761	0.240156	0.010695	0.151103		0.583333	0.0626635	-0.0587347	0.0213645	-0.0359122
0.586667	-0.01626	0.239474	0.01154	0.152692		0.586667	0.0642816	-0.0595246	0.0201503	-0.0323388
0.59	-0.01776	0.238303	0.011851	0.150776		0.59	0.0637036	-0.0578159	0.0247246	-0.0310815
0.593333	-0.01685	0.237241	0.01185	0.153161		0.593333	0.0627004	-0.0558849	0.0235874	-0.028098
0.596667	-0.01776	0.236954	0.012135	0.153665		0.596667	0.0639488	-0.0557365	0.0272032	-0.0253993
0.6	-0.01749	0.237071	0.016665	0.152316		0.6	0.0613879	-0.0555361	0.0266957	-0.0197342
0.603333	-0.01901	0.2367	0.019736	0.15543		0.603333	0.0613035	-0.0546605	0.0275836	-0.0199646
0.606667	-0.01846	0.237714	0.025464	0.15821		0.606667	0.0588828	-0.055576	0.028656	-0.0160877
0.61	-0.01852	0.23797	0.025115	0.160332		0.61	0.0594516	-0.0576079	0.0282662	-0.0151296
0.613333	-0.01763	0.237918	0.025975	0.16172		0.613333	0.058246	-0.0585488	0.0314251	-0.0136449
0.616667	-0.01779	0.236652	0.026463	0.166766		0.616667	0.0593577	-0.0571859	0.0290925	-0.0124435
0.62	-0.01803	0.237224	0.026983	0.16796		0.62	0.0585867	-0.0573803	0.0352704	-0.00980561
0.623333	-0.01847	0.236271	0.029335	0.169338		0.623333	0.058699	-0.0559506	0.03303	-0.00876629
0.626667	-0.0179	0.236002	0.032451	0.169738		0.626667	0.0585533	-0.0521428	0.0380567	-0.0061319
0.63	-0.0192	0.237496	0.036042	0.171992		0.63	0.0571939	-0.0513355	0.0358755	-0.00478715
0.633333	-0.02119	0.238434	0.038841	0.171492		0.633333	0.0568248	-0.0511449	0.0411431	-0.0028465
0.636667	-0.02159	0.238043	0.042237	0.176427		0.636667	0.0552737	-0.0489467	0.0375894	0.0012999
0.64	-0.02281	0.238829	0.042082	0.180704		0.64	0.0532212	-0.049397	0.0424337	0.00496464
0.643333	-0.02515	0.239229	0.044707	0.181262		0.643333	0.0505291	-0.050343	0.0411395	0.00765031
0.646667	-0.02622	0.237334	0.045625	0.185806		0.646667	0.0486745	-0.0500844	0.0458479	0.0107447
0.65	-0.02524	0.236168	0.045021	0.189648		0.65	0.0462679	-0.0486251	0.0450162	0.0143553
0.653333	-0.02643	0.236455	0.046507	0.187865		0.653333	0.0433226	-0.0491055	0.0498267	0.0162685
0.656667	-0.02651	0.237218	0.050612	0.188161		0.656667	0.0444883	-0.0495441	0.0499385	0.0204651
0.66	-0.02591	0.236493	0.046979	0.193272		0.66	0.0437996	-0.0485325	0.0519409	0.0230995
0.663333	-0.02524	0.235247	0.046433	0.19322		0.663333	0.0422331	-0.0482841	0.0518505	0.0267917
0.666667	-0.02531	0.236423	0.048768	0.1922		0.666667	0.0405149	-0.0489307	0.0541732	0.0309564
0.67	-0.0249	0.235325	0.047816	0.197095		0.67	0.0402537	-0.0480297	0.0548779	0.0339932
0.673333	-0.02454	0.233681	0.047248	0.199678		0.673333	0.0369073	-0.0467298	0.0564986	0.034646
0.676667	-0.02552	0.233847	0.053984	0.198741		0.676667	0.0358963	-0.0462494	0.0572172	0.0390531
0.68	-0.02571	0.235717	0.058513	0.202987		0.68	0.0342628	-0.0432463	0.0586378	0.0411715
0.683333	-0.02671	0.235434	0.061408	0.20517		0.683333	0.0327841	-0.0434665	0.05968	0.0435684
0.686667	-0.0268	0.236024	0.062123	0.207465		0.686667	0.0317479	-0.0446263	0.0603163	0.0471123
0.69	-0.02712	0.237084	0.06424	0.20838		0.69	0.0291535	-0.0435769	0.0607281	0.0510991
0.693333	-0.02834	0.236984	0.063945	0.212786		0.693333	0.0269795	-0.04517	0.0641965	0.0521172
0.696667	-0.02952	0.236956	0.06134	0.213914		0.696667	0.0254872	-0.0460496	0.0636327	0.055057
0.7	-0.02977	0.237429	0.064156	0.218801		0.7	0.024881	-0.0444618	0.0664111	0.0575955
0.703333	-0.0306	0.23669	0.066902	0.220122		0.703333	0.0246159	-0.0425829	0.0676212	0.0616887
0.706667	-0.0317	0.236065	0.066835	0.224085		0.706667	0.0249262	-0.0414572	0.072433	0.0632949
0.71	-0.03034	0.236684	0.066806	0.227955		0.71	0.0249935	-0.039628	0.0700974	0.0690513
0.713333	-0.02954	0.236932	0.073258	0.228209		0.713333	0.0250136	-0.0393502	0.0743373	0.0712861
0.716667	-0.02952	0.237168	0.071469	0.231046		0.716667	0.022291	-0.0394583	0.0744031	0.0744972
0.72	-0.02935	0.24011	0.072177	0.234116		0.72	0.0205105	-0.0398734	0.0792838	0.0772399
0.723333	-0.02917	0.241796	0.075278	0.236841		0.723333	0.0192825	-0.0416669	0.076319	0.0803532
0.726667	-0.0299	0.242696	0.079666	0.237348		0.726667	0.0175419	-0.0426482	0.0804701	0.0820058
0.73	-0.03028	0.244286	0.079414	0.240756		0.73	0.0152504	-0.042131	0.0782168	0.0875786
0.733333	-0.03169	0.244989	0.081872	0.242416		0.733333	0.0154887	-0.0417025	0.08117	0.0901042
0.736667	-0.03395	0.243686	0.082186	0.245214		0.736667	0.0126212	-0.0417095	0.077332	0.0932823
0.74	-0.03417	0.243443	0.085943	0.249257		0.74	0.013062	-0.0393117	0.0812088	0.0961041
0.743333	-0.03406	0.244032	0.087799	0.253326		0.743333	0.0134895	-0.0388147	0.0815573	0.0994667
0.746667	-0.03433	0.242237	0.088588	0.256283		0.746667	0.0140275	-0.0404797	0.0846473	0.101967
0.75	-0.03489	0.243179	0.089179	0.260117		0.75	0.0123768	-0.0391236	0.0853356	0.105315
0.753333	-0.03374	0.244517	0.093435	0.262885		0.753333	0.0132828	-0.0386113	0.0886238	0.10766
0.756667	-0.03471	0.244248	0.094117	0.26515		0.756667	0.0102114	-0.0389886	0.0888287	0.112198
0.76	-0.03545	0.24369	0.096696	0.266088		0.76	0.00690594	-0.0392704	0.0898141	0.114604
0.763333	-0.0365	0.245757	0.099021	0.270576		0.763333	0.00465884	-0.0368419	0.0916033	0.117591
0.766667	-0.03488	0.246009	0.102488	0.272484		0.766667	0.00365965	-0.0390817	0.0911508	0.121335
0.77	-0.03502	0.245971	0.104349	0.275534		0.77	0.00129677	-0.0375541	0.0954396	0.125452
0.773333	-0.03469	0.247418	0.105227	0.276412		0.773333	0.00227276	-0.0372519	0.0942872	0.12744
0.776667	-0.03508	0.249315	0.106739	0.280482		0.776667	0.00273338	-0.035727	0.0994873	0.131
0.78	-0.03484	0.248705	0.109532	0.283467		0.78	0.00214363	-0.0365885	0.0977676	0.133565
0.783333	-0.03564	0.250029	0.111349	0.286582		0.783333	0.00181765	-0.0361706	0.103217	0.137005
0.786667	-0.03636	0.25076	0.113718	0.289867		0.786667	0.00222514	-0.0362939	0.0991784	0.139696
0.79	-0.03727	0.25152	0.115495	0.293196		0.79	0.000392732	-0.0365089	0.105192	0.144656
0.793333	-0.03561	0.250862	0.114695	0.294458		0.793333	-0.00120048	-0.03661	0.103625	0.147704
0.796667	-0.03673	0.252249	0.115294	0.296813		0.796667	-0.00116064	-0.0365552	0.107306	0.151023
0.8	-0.03629	0.250686	0.117231	0.301647		0.8	-0.00267326	-0.0368596	0.106582	0.154161
0.803333	-0.03528	0.25203	0.115777	0.303772		0.803333	-0.00261197	-0.036261	0.111395	0.158752
0.806667	-0.03527	0.250993	0.119137	0.307594		0.806667	-0.00292715	-0.0361448	0.111609	0.161031
0.81	-0.0361	0.25155	0.12339	0.309585		0.81	-0.0033195	-0.0372169	0.112426	0.162947
0.813333	-0.03534	0.252753	0.126306	0.31316		0.813333	-0.00398968	-0.0366264	0.115819	0.165791
0.816667	-0.03641	0.255591	0.128666	0.315469		0.816667	-0.00357768	-0.0339176	0.115073	0.169663
0.82	-0.03785	0.254606	0.132065	0.320965		0.82	-0.00487158	-0.0352034	0.119471	0.173978
0.823333	-0.03856	0.257408	0.129943	0.324263		0.823333	-0.0052034	-0.0334583	0.117942	0.178767
0.826667	-0.03942	0.258976	0.128364	0.330063		0.826667	-0.00404675	-0.0312439	0.121564	0.183733
0.83	-0.0405	0.259242	0.129158	0.330737		0.83	-0.00379414	-0.0309595	0.120396	0.189279
0.833333	-0.04015	0.259329	0.129365	0.333643		0.833333	-0.00319703	-0.0312634	0.126137	0.191486
0.836667	-0.03932	0.260633	0.131728	0.333624		0.836667	-0.00278144	-0.0305516	0.124063	0.192124
0.84	-0.03797	0.260982	0.134424	0.338614		0.84	-0.00223989	-0.0304751	0.12773	0.1946
0.843333	-0.0391	0.261445	0.140138	0.339307		0.843333	-0.00264756	-0.0312139	0.128908	0.198197
0.846667	-0.03793	0.262738	0.142319	0.346289		0.846667	-0.00379805	-0.0315146	0.131166	0.199611
0.85	-0.03742	0.263632	0.143808	0.348889		0.85	-0.00413533	-0.0310331	0.132533	0.202046
0.853333	-0.03926	0.265619	0.146988	0.354288		0.853333	-0.0047612	-0.0320229	0.134789	0.207813
0.856667	-0.04096	0.266623	0.151304	0.355928		0.856667	-0.00430029	-0.0323195	0.13822	0.209785
0.86	-0.0401	0.267379	0.149229	0.364385		0.86	-0.00543581	-0.0307428	0.136987	0.212986
0.863333	-0.04103	0.268408	0.151173	0.364947		0.863333	-0.00589285	-0.0302504	0.141024	0.216404
0.866667	-0.04245	0.268916	0.155894	0.367705		0.866667	-0.00752726	-0.0299174	0.139458	0.220127
0.87	-0.04114	0.268707	0.156002	0.369536		0.87	-0.00889648	-0.0264645	0.142261	0.223338
0.873333	-0.03826	0.269716	0.154035	0.37227		0.873333	-0.0101001	-0.0259664	0.143286	0.22758
0.876667	-0.03766	0.270528	0.157262	0.375092		0.876667	-0.010336	-0.0250037	0.146284	0.23139
0.88	-0.03588	0.27117	0.159174	0.376534		0.88	-0.0088078	-0.0234438	0.148483	0.235719
0.883333	-0.03459	0.272841	0.158421	0.383635		0.883333	-0.00756061	-0.0236769	0.150437	0.240333
0.886667	-0.03549	0.275049	0.163222	0.3873		0.886667	-0.00616254	-0.0249146	0.153662	0.244356
0.89	-0.03743	0.276494	0.167921	0.39269		0.89	-0.00680429	-0.0257091	0.15181	0.248851
0.893333	-0.03754	0.277724	0.173045	0.393184		0.893333	-0.00582913	-0.0259668	0.155305	0.25096
0.896667	-0.03908	0.278919	0.174821	0.400265		0.896667	-0.0063344	-0.0263619	0.153767	0.252555
0.9	-0.03857	0.279043	0.176561	0.399294		0.9	-0.00746425	-0.0265751	0.156068	0.255901
0.903333	-0.03815	0.28137	0.176541	0.403399		0.903333	-0.00795817	-0.0250814	0.156855	0.260413
0.906667	-0.037	0.282334	0.180968	0.404588		0.906667	-0.00809873	-0.023906	0.160377	0.261932
0.91	-0.0379	0.283386	0.182756	0.410034		0.91	-0.00896695	-0.0236721	0.161971	0.266203
0.913333	-0.03772	0.283568	0.185858	0.411298		0.913333	-0.0102235	-0.0217248	0.162603	0.270296
0.916667	-0.03858	0.284933	0.187837	0.41787		0.916667	-0.00989396	-0.0208337	0.166057	0.273125
0.92	-0.03766	0.284916	0.190353	0.41951		0.92	-0.0105398	-0.0207792	0.166326	0.275937
0.923333	-0.03928	0.2858	0.189322	0.425174		0.923333	-0.0101059	-0.0185114	0.17038	0.279202
0.926667	-0.03926	0.288989	0.187626	0.426329		0.926667	-0.010171	-0.0184446	0.171775	0.283387
0.93	-0.03984	0.291831	0.186586	0.431425		0.93	-0.00988303	-0.0175558	0.174776	0.286482
0.933333	-0.04038	0.2925	0.191085	0.434003		0.933333	-0.0097704	-0.0176028	0.17826	0.289084
0.936667	-0.04118	0.293761	0.192534	0.439253		0.936667	-0.00920866	-0.0173561	0.178917	0.291082
0.94	-0.04032	0.296084	0.196005	0.440144		0.94	-0.0100497	-0.0175075	0.180491	0.29475
0.943333	-0.03982	0.296882	0.201282	0.445563		0.943333	-0.0105568	-0.0160101	0.180646	0.295753
0.946667	-0.03959	0.296524	0.205866	0.447377		0.946667	-0.0103049	-0.0173947	0.183737	0.299129
0.95	-0.03937	0.298716	0.205315	0.450863		0.95	-0.01047	-0.0156876	0.184044	0.301977
0.953333	-0.04119	0.300344	0.210144	0.451847		0.953333	-0.0120726	-0.0151884	0.186912	0.305472
0.956667	-0.04114	0.301237	0.21101	0.457217		0.956667	-0.0117052	-0.0152346	0.189165	0.308215
0.96	-0.0415	0.302008	0.211113	0.459546		0.96	-0.0119117	-0.0145988	0.19101	0.312294
0.963333	-0.04377	0.304169	0.21478	0.464899		0.963333	-0.0114998	-0.0122984	0.193829	0.314657
0.966667	-0.04336	0.305746	0.219809	0.468114		0.966667	-0.0113588	-0.0119701	0.195447	0.318883
0.97	-0.04193	0.306765	0.219005	0.472002		0.97	-0.0102999	-0.0107679	0.197875	0.32445
0.973333	-0.04234	0.309016	0.221369	0.473278		0.973333	-0.0106009	-0.0105969	0.198879	0.329608
0.976667	-0.04358	0.309972	0.224602	0.479097		0.976667	-0.0102875	-0.011227	0.198999	0.33218
0.98	-0.03988	0.312083	0.221965	0.481137		0.98	-0.0111313	-0.0114501	0.200851	0.335508
0.983333	-0.041	0.312786	0.225362	0.485135		0.983333	-0.0112918	-0.0111393	0.20034	0.338744
0.986667	-0.04052	0.316877	0.228467	0.490733		0.986667	-0.012382	-0.010413	0.204144	0.341405
0.99	-0.04128	0.317581	0.230657	0.494258		0.99	-0.0134898	-0.00864642	0.205405	0.343847
0.993333	-0.03989	0.320279	0.231836	0.497646		0.993333	-0.0138248	-0.00754438	0.208115	0.348898
0.996667	-0.04114	0.321489	0.238752	0.50094		0.996667	-0.0141259	-0.00870447	0.210305	0.352234
1	-0.04088	0.322672	0.2372	0.504289		1	-0.0150871	-0.0082074	0.212814	0.355487
1.00333	-0.04073	0.323199	0.239578	0.506432		1.00333	-0.0132401	-0.00985612	0.214065	0.357868
1.00667	-0.03957	0.324412	0.24269	0.511133		1.00667	-0.0129418	-0.0107718	0.216575	0.359598
1.01	-0.04083	0.32609	0.248807	0.513191		1.01	-0.0119397	-0.010955	0.218249	0.362187
1.01333	-0.04062	0.32836	0.248882	0.515581		1.01333	-0.0119831	-0.00953908	0.219846	0.366371
1.01667	-0.04058	0.331851	0.252723	0.519449		1.01667	-0.011564	-0.0112167	0.220094	0.368538
1.02	-0.04147	0.333143	0.253412	0.523062		1.02	-0.0113588	-0.0100702	0.221748	0.372957
1.02333	-0.04226	0.335672	0.252975	0.525623		1.02333	-0.0111261	-0.00902807	0.222303	0.376222
1.02667	-0.04066	0.33728	0.255139	0.527536		1.02667	-0.0116273	-0.0083713	0.225188	0.379421
1.03	-0.04118	0.338599	0.258809	0.532289		1.03	-0.0112976	-0.00767483	0.22658	0.380344
1.03333	-0.0406	0.341343	0.26032	0.533559		1.03333	-0.00984157	-0.00476615	0.229794	0.383747
1.03667	-0.03935	0.344138	0.262268	0.538006		1.03667	-0.0105429	-0.00411697	0.233687	0.384944
1.04	-0.03894	0.345052	0.268656	0.541842		1.04	-0.0110705	-0.00399759	0.234598	0.388143
1.04333	-0.04129	0.347185	0.270253	0.547501		1.04333	-0.0119649	-0.00262846	0.237785	0.389992
1.04667	-0.0425	0.349328	0.27212	0.548937		1.04667	-0.0130239	-0.00287568	0.23983	0.393572
1.05	-0.04281	0.350044	0.27253	0.55309		1.05	-0.0141388	-0.00319541	0.240137	0.396316
1.05333	-0.04391	0.352647	0.275544	0.553791		1.05333	-0.0158426	-0.00230169	0.241078	0.399796
1.05667	-0.04483	0.355891	0.27823	0.556535		1.05667	-0.013243	-0.00274853	0.242443	0.403546
1.06	-0.04256	0.35753	0.27901	0.558086		1.06	-0.0130787	-0.00396023	0.24296	0.405473
1.06333	-0.04035	0.35903	0.281679	0.561968		1.06333	-0.0123232	-0.00292022	0.243886	0.408768
1.06667	-0.04048	0.361428	0.286011	0.564761		1.06667	-0.012075	-0.00214185	0.245461	0.411788
1.07	-0.04072	0.363297	0.289334	0.569416		1.07	-0.010602	-0.00149614	0.247967	0.414996
1.07333	-0.04011	0.365582	0.290358	0.573122		1.07333	-0.0111849	0.000387547	0.250429	0.416885
1.07667	-0.03946	0.368308	0.293532	0.577582		1.07667	-0.0106709	0.00141253	0.25188	0.419767
1.08	-0.04076	0.371745	0.29421	0.582793		1.08	-0.00968182	0.00223063	0.254956	0.422648
1.08333	-0.04033	0.373389	0.296339	0.586091		1.08333	-0.0105457	0.00300783	0.256827	0.42456
1.08667	-0.03942	0.375716	0.297687	0.587382		1.08667	-0.0100288	0.00231405	0.258292	0.428934
1.09	-0.03889	0.37709	0.298568	0.590145		1.09	-0.0112053	0.00265677	0.259675	0.430879
1.09333	-0.04001	0.378815	0.303173	0.592957		1.09333	-0.0121566	0.00294169	0.261689	0.435132
1.09667	-0.03887	0.381223	0.305498	0.594289		1.09667	-0.0139876	0.00393496	0.263431	0.437977
1.1	-0.0384	0.384711	0.30816	0.598396		1.1	-0.0129341	0.00513083	0.265962	0.441159
1.10333	-0.0405	0.387969	0.310878	0.601988		1.10333	-0.0134287	0.00621922	0.267141	0.443673
1.10667	-0.04096	0.391045	0.314191	0.606834		1.10667	-0.0126156	0.0074997	0.270645	0.447571
1.11	-0.04031	0.393804	0.3161	0.608839		1.11	-0.0132129	0.0096473	0.272049	0.450213
1.11333	-0.04097	0.396377	0.319858	0.612029		1.11333	-0.0128689	0.00910693	0.273954	0.453362
1.11667	-0.03982	0.398353	0.324327	0.61546		1.11667	-0.014153	0.00873131	0.27581	0.456379
1.12	-0.03827	0.400447	0.328408	0.619609		1.12	-0.0146678	0.0102418	0.277713	0.459146
1.12333	-0.03842	0.402834	0.330349	0.620618		1.12333	-0.0146814	0.0100079	0.27907	0.46303
1.12667	-0.03899	0.405843	0.329775	0.623657		1.12667	-0.0151652	0.00969666	0.281142	0.465802
1.13	-0.03899	0.407449	0.33174	0.627028		1.13	-0.0156879	0.0110312	0.283549	0.467589
1.13333	-0.0403	0.410122	0.33346	0.63008		1.13333	-0.0155957	0.0107137	0.285664	0.470455
1.13667	-0.03973	0.413726	0.335704	0.632789		1.13667	-0.014936	0.0109094	0.288101	0.47271
1.14	-0.03793	0.416964	0.339426	0.637779		1.14	-0.0162069	0.00962681	0.290232	0.47406
1.14333	-0.03734	0.416998	0.341555	0.642662		1.14333	-0.0149206	0.00941123	0.290945	0.475558
1.14667	-0.03658	0.421334	0.344481	0.645794		1.14667	-0.0150756	0.00990659	0.291864	0.478641
1.15	-0.03724	0.424428	0.349612	0.649837		1.15	-0.0150456	0.0135804	0.294101	0.480096
1.15333	-0.03618	0.427043	0.350174	0.65288		1.15333	-0.0163164	0.0133623	0.29482	0.481952
1.15667	-0.03724	0.429	0.351548	0.656197		1.15667	-0.0170267	0.0165154	0.298754	0.483958
1.16	-0.03775	0.434005	0.355594	0.659007		1.16	-0.0171879	0.0180255	0.300925	0.48487
1.16333	-0.03753	0.435253	0.35877	0.66323		1.16333	-0.0166495	0.0185717	0.300677	0.48753
1.16667	-0.03654	0.435984	0.35929	0.663279		1.16667	-0.0176894	0.0162779	0.304656	0.489376
1.17	-0.03682	0.438883	0.361488	0.667361		1.17	-0.0166096	0.0175831	0.30459	0.492953
1.17333	-0.0361	0.443295	0.364726	0.670552		1.17333	-0.0157334	0.0164463	0.306351	0.495171
1.17667	-0.03552	0.446539	0.364829	0.673094		1.17667	-0.0163384	0.0169918	0.308968	0.499238
1.18	-0.03579	0.44998	0.366875	0.674534		1.18	-0.0166502	0.017162	0.309904	0.499759
1.18333	-0.03517	0.453643	0.367559	0.681205		1.18333	-0.015832	0.0185527	0.311506	0.503228
1.18667	-0.03508	0.456354	0.371377	0.68123		1.18667	-0.0181016	0.0187453	0.313798	0.504414
1.19	-0.03481	0.458388	0.372215	0.682843		1.19	-0.0180554	0.0201408	0.311916	0.506813
1.19333	-0.03529	0.460852	0.378908	0.683456		1.19333	-0.0165968	0.0198228	0.31476	0.50891
1.19667	-0.03505	0.46331	0.380866	0.687133		1.19667	-0.0166226	0.0191422	0.316567	0.511951
1.2	-0.0351	0.466439	0.384622	0.688271		1.2	-0.015865	0.0200299	0.317595	0.513666
1.20333	-0.03627	0.4693	0.386119	0.694256		1.20333	-0.0140403	0.0205361	0.321414	0.516395
1.20667	-0.03703	0.471928	0.390597	0.697581		1.20667	-0.0141355	0.0215982	0.322869	0.518221
1.21	-0.0358	0.475606	0.39069	0.702612		1.21	-0.0151501	0.0199491	0.326478	0.519636
1.21333	-0.03489	0.479442	0.392022	0.705262		1.21333	-0.014987	0.0217116	0.328065	0.521448
1.21667	-0.03526	0.482448	0.393378	0.70828		1.21667	-0.0159345	0.0213022	0.328307	0.523992
1.22	-0.03424	0.48637	0.39756	0.709905		1.22	-0.0167565	0.0217093	0.329882	0.527728
1.22333	-0.03173	0.490482	0.39978	0.711943		1.22333	-0.0166343	0.0216972	0.331056	0.531594
1.22667	-0.03173	0.494328	0.405877	0.71554		1.22667	-0.0173011	0.0254774	0.33201	0.534125
1.23	-0.03122	0.496029	0.408591	0.717877		1.23	-0.0182837	0.0244351	0.333735	0.535921
1.23333	-0.03092	0.502018	0.409267	0.721197		1.23333	-0.0184487	0.0268335	0.334053	0.53902
1.23667	-0.03082	0.505792	0.41294	0.724622		1.23667	-0.0187472	0.027738	0.337388	0.540889
1.24	-0.03191	0.507715	0.415656	0.728479		1.24	-0.0195624	0.029358	0.341243	0.541887
1.24333	-0.03217	0.50974	0.416321	0.730208		1.24333	-0.0187337	0.0289864	0.341149	0.54472
1.24667	-0.0323	0.514896	0.418775	0.73467		1.24667	-0.0172136	0.0304964	0.34632	0.54886
1.25	-0.03199	0.516999	0.421799	0.736199		1.25	-0.0163168	0.030427	0.348862	0.549539
1.25333	-0.03205	0.520464	0.423517	0.739573		1.25333	-0.0164407	0.0320222	0.348927	0.551521
1.25667	-0.03134	0.52721	0.424416	0.744248		1.25667	-0.0152798	0.0309435	0.351633	0.553351
1.26	-0.03118	0.531334	0.426513	0.748263		1.26	-0.0143141	0.0324693	0.351515	0.555657
1.26333	-0.03278	0.5344	0.427906	0.750171		1.26333	-0.0149657	0.032244	0.353323	0.555685
1.26667	-0.03171	0.53907	0.433755	0.754349		1.26667	-0.0154428	0.0323259	0.35579	0.556993
1.27	-0.03057	0.543446	0.434377	0.756265		1.27	-0.014484	0.0331685	0.357065	0.559247
1.27333	-0.03047	0.546968	0.438372	0.755689		1.27333	-0.0149864	0.0326241	0.359245	0.560664
1.27667	-0.02892	0.550625	0.439698	0.758565		1.27667	-0.0167333	0.0326957	0.361368	0.559749
1.28	-0.02811	0.554839	0.444097	0.760444		1.28	-0.016223	0.0351153	0.360144	0.562113
1.28333	-0.02872	0.556911	0.445222	0.762969		1.28333	-0.0152547	0.0350107	0.362503	0.565406
1.28667	-0.02916	0.561461	0.448441	0.765597		1.28667	-0.0157144	0.0346782	0.362196	0.56709
1.29	-0.02934	0.563372	0.449349	0.76986		1.29	-0.0162978	0.0382158	0.365449	0.568093
1.29333	-0.03119	0.567477	0.452866	0.772361		1.29333	-0.0151588	0.039366	0.368784	0.571676
1.29667	-0.03084	0.572856	0.454549	0.77782		1.29667	-0.0147961	0.0391298	0.36945	0.573538
1.3	-0.02947	0.577371	0.457697	0.780097		1.3	-0.0147401	0.0412898	0.372838	0.57522
1.30333	-0.0284	0.580087	0.460239	0.782569		1.30333	-0.0145462	0.041511	0.375805	0.577978
1.30667	-0.02858	0.586305	0.464125	0.783351		1.30667	-0.0139786	0.0418154	0.37372	0.582477
1.31	-0.02749	0.59021	0.466339	0.785172		1.31	-0.0138713	0.0425045	0.377067	0.583925
1.31333	-0.02869	0.593112	0.469298	0.784763		1.31333	-0.014976	0.0443236	0.378151	0.585702
1.31667	-0.03085	0.597984	0.470758	0.788993		1.31667	-0.016123	0.0443735	0.378404	0.586121
1.32	-0.03233	0.601937	0.472675	0.793849		1.32	-0.0160429	0.0443432	0.382976	0.585883
1.32333	-0.03166	0.605624	0.475807	0.797793		1.32333	-0.0161485	0.044946	0.382799	0.587756
1.32667	-0.03033	0.611063	0.479233	0.798459		1.32667	-0.0164885	0.0456702	0.383814	0.589759
1.33	-0.02742	0.616472	0.482288	0.80294		1.33	-0.0146108	0.0448925	0.387936	0.591296
1.33333	-0.02634	0.621169	0.484678	0.804403		1.33333	-0.0140554	0.045969	0.3873	0.594197
1.33667	-0.02455	0.626831	0.488789	0.805147		1.33667	-0.0142337	0.0476788	0.386364	0.596329
1.34	-0.02337	0.631911	0.490159	0.807468		1.34	-0.0140056	0.0468991	0.390969	0.597113
1.34333	-0.02322	0.634075	0.491945	0.811714		1.34333	-0.014211	0.0471534	0.391664	0.598611
1.34667	-0.0235	0.637093	0.491104	0.8124		1.34667	-0.0151907	0.0490095	0.394383	0.600062
1.35	-0.02269	0.641979	0.495263	0.812067		1.35	-0.0160336	0.0493948	0.396445	0.601458
1.35333	-0.02209	0.64593	0.497287	0.814885		1.35333	-0.0153802	0.0499843	0.397047	0.603811
1.35667	-0.02364	0.649796	0.501254	0.817964		1.35667	-0.0138861	0.05062	0.399857	0.604175
1.36	-0.02533	0.655884	0.502793	0.818854		1.36	-0.0140479	0.0511726	0.400903	0.606557
1.36333	-0.02613	0.659794	0.509199	0.821517		1.36333	-0.0139651	0.0521264	0.399654	0.607402
1.36667	-0.02575	0.663554	0.509583	0.827938		1.36667	-0.0131076	0.0526261	0.40424	0.608551
1.37	-0.02505	0.669569	0.511003	0.830486		1.37	-0.0136964	0.0551735	0.405213	0.610247
1.37333	-0.02399	0.675683	0.512286	0.833853		1.37333	-0.0147037	0.0575774	0.406984	0.612609
1.37667	-0.02277	0.679531	0.514876	0.837706		1.37667	-0.0145582	0.058103	0.410607	0.613472
1.38	-0.02192	0.685795	0.516999	0.838477		1.38	-0.0143001	0.0577901	0.411756	0.614381
1.38333	-0.0214	0.690729	0.520278	0.840796		1.38333	-0.0139818	0.0583689	0.411619	0.615846
1.38667	-0.02159	0.694175	0.524079	0.842986		1.38667	-0.0126895	0.0561054	0.415901	0.61701
1.39	-0.02127	0.698203	0.524967	0.844457		1.39	-0.0130656	0.0561213	0.414205	0.619855
1.39333	-0.02106	0.704962	0.53067	0.846497		1.39333	-0.0117106	0.0576602	0.41473	0.622543
1.39667	-0.01935	0.709233	0.532097	0.850566		1.39667	-0.0131443	0.0575108	0.416847	0.625092
1.4	-0.01906	0.712576	0.534426	0.850645		1.4	-0.0142653	0.0598656	0.417098	0.626536
1.40333	-0.01878	0.718207	0.536937	0.854536		1.40333	-0.0165345	0.060057	0.41757	0.627705
1.40667	-0.01853	0.724528	0.54166	0.855716		1.40667	-0.0163675	0.0613194	0.420253	0.628195
1.41	-0.01798	0.728843	0.542938	0.85776		1.41	-0.0169593	0.0626012	0.419161	0.626928
1.41333	-0.01824	0.734384	0.546341	0.861391		1.41333	-0.0170028	0.0651002	0.42312	0.627872
1.41667	-0.01686	0.740727	0.547378	0.864275		1.41667	-0.0167481	0.0643291	0.424131	0.629921
1.42	-0.01649	0.745189	0.551202	0.865151		1.42	-0.0163702	0.0667668	0.423734	0.632384
1.42333	-0.01678	0.75108	0.55207	0.86841		1.42333	-0.0159512	0.0673827	0.428677	0.63375
1.42667	-0.0173	0.756021	0.552674	0.870744		1.42667	-0.0163632	0.0649643	0.431732	0.636609
1.43	-0.01774	0.76244	0.554535	0.872908		1.43	-0.015518	0.0654963	0.429184	0.639206
1.43333	-0.01892	0.767588	0.555971	0.875941		1.43333	-0.0154718	0.0657777	0.433498	0.638891
1.43667	-0.01886	0.773689	0.558228	0.877909		1.43667	-0.0136411	0.0667062	0.436172	0.639705
1.44	-0.01647	0.778844	0.561308	0.879158		1.44	-0.0148351	0.0666636	0.433304	0.64196
1.44333	-0.01636	0.78463	0.565018	0.880126		1.44333	-0.013412	0.0694194	0.435318	0.64097
1.44667	-0.01629	0.788383	0.567499	0.881811		1.44667	-0.01424	0.0706593	0.438328	0.642043
1.45	-0.01572	0.793461	0.572257	0.883533		1.45	-0.0137525	0.0722265	0.436564	0.644132
1.45333	-0.01567	0.799102	0.570216	0.884641		1.45333	-0.013685	0.0728234	0.440517	0.645509
1.45667	-0.01504	0.804899	0.574544	0.887607		1.45667	-0.0137115	0.0745813	0.443534	0.643731
1.46	-0.01288	0.809859	0.57754	0.891446		1.46	-0.0154293	0.0769189	0.44288	0.647221
1.46333	-0.01112	0.814992	0.581453	0.891248		1.46333	-0.0160323	0.0787206	0.447084	0.648092
1.46667	-0.01032	0.820748	0.581434	0.893346		1.46667	-0.0158065	0.0784639	0.450002	0.651087
1.47	-0.01098	0.826564	0.586219	0.89431		1.47	-0.0172332	0.0802578	0.449561	0.652455
1.47333	-0.01104	0.831379	0.5856	0.896708		1.47333	-0.0171154	0.0800882	0.451844	0.655087
1.47667	-0.0112	0.837121	0.586489	0.897982		1.47667	-0.0169505	0.078273	0.452862	0.656617
1.48	-0.01131	0.843333	0.586533	0.902673		1.48	-0.0162371	0.0759532	0.451566	0.657219
1.48333	-0.01145	0.849248	0.592576	0.904823		1.48333	-0.0173071	0.0783314	0.454048	0.654798
1.48667	-0.01008	0.853823	0.593875	0.909903		1.48667	-0.0155736	0.078014	0.453922	0.655521
1.49	-0.01104	0.860545	0.595807	0.91099		1.49	-0.014784	0.0781488	0.453904	0.657027
1.49333	-0.01005	0.86589	0.599478	0.912969		1.49333	-0.0153105	0.0791942	0.459355	0.656867
1.49667	-0.01069	0.872266	0.602232	0.914252		1.49667	-0.0139756	0.0807547	0.458663	0.658414
1.5	-0.01042	0.87797	0.604187	0.916351		1.5	-0.0130794	0.0813333	0.457934	0.660513
1.50333	-0.00949	0.885211	0.607693	0.917559		1.50333	-0.0138577	0.0833041	0.461812	0.66152
1.50667	-0.00646	0.892148	0.612114	0.919036		1.50667	-0.0140304	0.0856269	0.463429	0.661987
1.51	-0.00586	0.899119	0.612784	0.92117		1.51	-0.0134361	0.0867668	0.461281	0.663831
1.51333	-0.00447	0.903808	0.61415	0.920508		1.51333	-0.0137766	0.0888651	0.467216	0.665604
1.51667	-0.00297	0.910304	0.614797	0.922574		1.51667	-0.0137459	0.0902312	0.46646	0.666986
1.52	-0.00366	0.915827	0.618645	0.92251		1.52	-0.0138396	0.0896758	0.464169	0.66695
1.52333	-0.00426	0.922847	0.619649	0.925585		1.52333	-0.0139	0.0900282	0.467353	0.666842
1.52667	-0.00336	0.926889	0.623414	0.927324		1.52667	-0.0138732	0.0913042	0.468165	0.667554
1.53	-0.00212	0.934556	0.626852	0.932199		1.53	-0.0139225	0.0912216	0.465178	0.666605
1.53333	-0.00187	0.941098	0.629614	0.934407		1.53333	-0.0137974	0.0913575	0.470475	0.667892
1.53667	0.000739	0.946764	0.631439	0.936504		1.53667	-0.0136572	0.0923809	0.473145	0.669198
1.54	0.001204	0.953542	0.635081	0.938256		1.54	-0.0143337	0.0945948	0.471607	0.672419
1.54333	0.000761	0.961806	0.637291	0.940209		1.54333	-0.0143089	0.0949118	0.474656	0.672633
1.54667	0.000258	0.967607	0.639814	0.940994		1.54667	-0.0154718	0.0959711	0.477669	0.675787
1.55	-4.3e-05	0.973318	0.640894	0.944119		1.55	-0.0152622	0.0960199	0.476242	0.676441
1.55333	-0.00193	0.979096	0.64415	0.949138		1.55333	-0.015007	0.0969663	0.478729	0.676812
1.55667	-0.00328	0.986398	0.64622	0.949275		1.55667	-0.013283	0.0960742	0.481755	0.677405
1.56	-0.00319	0.993726	0.649318	0.952327		1.56	-0.0127122	0.0962622	0.479929	0.678105
1.56333	-0.00303	0.999136	0.650897	0.952835		1.56333	-0.0120723	0.0976724	0.48152	0.676002
1.56667	-0.00325	1.00549	0.653366	0.953501		1.56667	-0.0126811	0.0979713	0.484423	0.676405
1.57	-0.00141	1.01205	0.65282	0.952209		1.57	-0.0128716	0.0998939	0.483628	0.677808
1.57333	0.000276	1.01898	0.656954	0.956365		1.57333	-0.0135891	0.101272	0.483957	0.677816
1.57667	-0.00045	1.02528	0.659441	0.958548		1.57667	-0.0151353	0.10322	0.488292	0.679118
1.58	-0.00102	1.03336	0.662269	0.961001		1.58	-0.0152909	0.105487	0.486317	0.681922
1.58333	0.001519	1.04045	0.665768	0.961576		1.58333	-0.014382	0.108349	0.486788	0.681876
1.58667	0.002164	1.04876	0.668205	0.964484		1.58667	-0.0156201	0.109102	0.489557	0.684308
1.59	0.001888	1.05615	0.665975	0.963613		1.59	-0.0153206	0.10978	0.489231	0.686049
1.59333	0.004232	1.06284	0.668765	0.966313		1.59333	-0.0136397	0.111181	0.487993	0.685378
1.59667	0.006751	1.06983	0.671152	0.969388		1.59667	-0.0139644	0.110532	0.493134	0.685853
1.6	0.006333	1.07598	0.67658	0.972085		1.6	-0.0147122	0.110987	0.494253	0.688216
1.60333	0.005094	1.08346	0.675952	0.976356		1.60333	-0.0128729	0.112873	0.492756	0.687091
1.60667	0.0073	1.08959	0.68533	0.978937		1.60667	-0.0119761	0.113838	0.495888	0.687309
1.61	0.008178	1.09616	0.682179	0.979618		1.61	-0.0120423	0.116289	0.499908	0.688568
1.61333	0.00779	1.10184	0.687222	0.982517		1.61333	-0.0109074	0.117746	0.498041	0.690252
1.61667	0.009439	1.10982	0.68763	0.985398		1.61667	-0.00988312	0.118189	0.499597	0.689904
1.62	0.011749	1.11522	0.693456	0.983767		1.62	-0.00982943	0.116101	0.505526	0.690707
1.62333	0.011569	1.12312	0.691515	0.984028		1.62333	-0.0109809	0.1176	0.505376	0.690858
1.62667	0.012468	1.12999	0.697013	0.98365		1.62667	-0.0105849	0.117822	0.504514	0.693177
1.63	0.013144	1.13794	0.698485	0.982529		1.63	-0.0102174	0.119699	0.509178	0.690545
1.63333	0.012558	1.14597	0.697378	0.983467		1.63333	-0.0113105	0.120938	0.509216	0.692049
1.63667	0.013393	1.15443	0.699623	0.985612		1.63667	-0.011706	0.124225	0.507224	0.691596
1.64	0.014506	1.1628	0.701061	0.988213		1.64	-0.0126285	0.125474	0.51176	0.694197
1.64333	0.012865	1.17014	0.705737	0.989943		1.64333	-0.0131101	0.125876	0.512101	0.693338
1.64667	0.013229	1.1759	0.705074	0.994288		1.64667	-0.0136134	0.126095	0.507569	0.69611
1.65	0.013297	1.18222	0.708844	0.996233		1.65	-0.0130549	0.126787	0.510371	0.696386
1.65333	0.013627	1.18922	0.711732	0.997911		1.65333	-0.013141	0.127297	0.512942	0.697821
1.65667	0.013665	1.19561	0.712999	1.0019		1.65667	-0.0116645	0.128416	0.510514	0.696034
1.66	0.015925	1.20342	0.713528	1.00193		1.66	-0.0110694	0.129962	0.51231	0.698736
1.66333	0.017081	1.2124	0.716475	1.00246		1.66333	-0.00999904	0.131903	0.517728	0.699605
1.66667	0.017747	1.21968	0.719461	1.00319		1.66667	-0.0107944	0.13332	0.516831	0.701169
1.67	0.017964	1.22771	0.719676	1.00462		1.67	-0.0104197	0.1353	0.51584	0.702572
1.67333	0.020506	1.23687	0.722094	1.00633		1.67333	-0.0102104	0.136717	0.518999	0.704197
1.67667	0.020562	1.24306	0.72177	1.00973		1.67667	-0.0105156	0.137449	0.519669	0.702815
1.68	0.021721	1.25067	0.72296	1.00851		1.68	-0.0115347	0.137163	0.517907	0.70343
1.68333	0.023506	1.25759	0.724837	1.01144		1.68333	-0.00957958	0.138101	0.519876	0.702455
1.68667	0.024325	1.26319	0.730487	1.01299		1.68667	-0.0107049	0.139896	0.521917	0.702639
1.69	0.022056	1.27226	0.733381	1.01225		1.69	-0.0101688	0.140167	0.520842	0.703308
1.69333	0.023284	1.28106	0.740108	1.01473		1.69333	-0.0105194	0.14172	0.522287	0.70418
1.69667	0.023332	1.28996	0.742742	1.01898		1.69667	-0.0103941	0.143489	0.525368	0.703316
1.7	0.024112	1.29818	0.743839	1.01652		1.7	-0.0103543	0.145209	0.523984	0.704109
1.70333	0.024333	1.30702	0.74393	1.01801		1.70333	-0.010108	0.144341	0.523658	0.70485
1.70667	0.026302	1.31568	0.747335	1.01887		1.70667	-0.0125214	0.145885	0.527474	0.704944
1.71	0.02638	1.32241	0.747414	1.0184		1.71	-0.0094281	0.145458	0.527945	0.705187
1.71333	0.028629	1.32741	0.750407	1.02049		1.71333	-0.00832081	0.145595	0.526271	0.705155
1.71667	0.027875	1.33548	0.7544	1.02231		1.71667	-0.0100702	0.145491	0.528878	0.705413
1.72	0.028532	1.34362	0.756708	1.02474		1.72	-0.00912095	0.146286	0.531552	0.704278
1.72333	0.028941	1.35102	0.756642	1.02653		1.72333	-0.00756149	0.146589	0.530055	0.704229
1.72667	0.029727	1.35911	0.760669	1.02915		1.72667	-0.0101308	0.149102	0.530133	0.705041
1.73	0.029986	1.36667	0.76316	1.02839		1.73	-0.0114818	0.151199	0.53403	0.707287
1.73333	0.03125	1.37442	0.763136	1.0307		1.73333	-0.0108153	0.152892	0.533607	0.709402
1.73667	0.032322	1.38132	0.764709	1.03182		1.73667	-0.0109338	0.155199	0.530741	0.711215
1.74	0.033294	1.39128	0.76869	1.03419		1.74	-0.0110261	0.156429	0.533014	0.710776
1.74333	0.034718	1.39923	0.767073	1.03617		1.74333	-0.011309	0.157088	0.534504	0.710631
1.74667	0.034043	1.40827	0.768017	1.03828		1.74667	-0.0116993	0.160199	0.533077	0.710351
1.75	0.035038	1.41632	0.772139	1.03815		1.75	-0.0106834	0.162189	0.534663	0.709294
1.75333	0.036738	1.42487	0.775416	1.03794		1.75333	-0.0115767	0.162806	0.539842	0.709876
1.75667	0.037131	1.43227	0.774833	1.03894		1.75667	-0.0109445	0.164214	0.538555	0.712917
1.76	0.037439	1.44174	0.781073	1.04114		1.76	-0.00927411	0.165949	0.539881	0.712976
1.76333	0.038028	1.45079	0.781011	1.04311		1.76333	-0.00783936	0.164505	0.543359	0.712902
1.76667	0.038284	1.45932	0.7809	1.04429		1.76667	-0.00835998	0.165189	0.543705	0.71327
1.77	0.03746	1.46804	0.78186	1.04721		1.77	-0.00743533	0.166555	0.542251	0.713308
1.77333	0.038378	1.47756	0.786764	1.0495		1.77333	-0.00751195	0.168906	0.546472	0.712571
1.77667	0.03802	1.48705	0.785502	1.04845		1.77667	-0.00764661	0.168257	0.546162	0.713392
1.78	0.038913	1.4956	0.789991	1.04956		1.78	-0.0072283	0.171211	0.542598	0.714506
1.78333	0.03929	1.50379	0.793461	1.05195		1.78333	-0.00815495	0.172428	0.544276	0.715515
1.78667	0.040964	1.51188	0.796609	1.0513		1.78667	-0.00687751	0.173595	0.547381	0.71509
1.79	0.04128	1.52104	0.794785	1.0513		1.79	-0.00615964	0.173551	0.546295	0.714926
1.79333	0.042238	1.52918	0.797045	1.05357		1.79333	-0.00708161	0.17652	0.546183	0.714157
1.79667	0.043323	1.53707	0.799142	1.05577		1.79667	-0.00714359	0.177524	0.550561	0.713941
1.8	0.044778	1.54576	0.80119	1.05682		1.8	-0.00497152	0.178387	0.552809	0.711866
1.80333	0.044228	1.55496	0.801407	1.06005		1.80333	-0.00718646	0.18115	0.551233	0.712892
1.80667	0.044881	1.56267	0.805695	1.059		1.80667	-0.00682919	0.182597	0.552761	0.712346
1.81	0.045682	1.56993	0.805464	1.05922		1.81	-0.00557122	0.182873	0.557663	0.713059
1.81333	0.04589	1.57888	0.808185	1.05779		1.81333	-0.00564596	0.182821	0.558331	0.71372
1.81667	0.046181	1.58779	0.81135	1.06057		1.81667	-0.00401233	0.184489	0.556359	0.715442
1.82	0.045913	1.59582	0.812587	1.05981		1.82	-0.00451652	0.183915	0.557029	0.71581
1.82333	0.047107	1.60679	0.814902	1.06392		1.82333	-0.00495465	0.18473	0.558598	0.717424
1.82667	0.047896	1.61553	0.821088	1.06609		1.82667	-0.00470294	0.186874	0.557095	0.717275
1.83	0.048357	1.6246	0.816204	1.06779		1.83	-0.00512332	0.188873	0.55682	0.717153
1.83333	0.048411	1.63272	0.817629	1.06737		1.83333	-0.00694554	0.190036	0.560866	0.71847
1.83667	0.051143	1.64172	0.821003	1.06792		1.83667	-0.00411302	0.192118	0.561476	0.718012
1.84	0.052081	1.6516	0.820835	1.06789		1.84	-0.00437264	0.194087	0.559419	0.718506
1.84333	0.053657	1.66043	0.820061	1.06802		1.84333	-0.00337069	0.19432	0.560685	0.7203
1.84667	0.055587	1.66938	0.826667	1.06715		1.84667	-0.0021718	0.196168	0.561329	0.720423
1.85	0.057601	1.67824	0.826838	1.06806		1.85	-0.00214241	0.196243	0.558026	0.719757
1.85333	0.057564	1.68861	0.829716	1.06878		1.85333	-0.00129292	0.196977	0.558387	0.719966
1.85667	0.058587	1.69797	0.832664	1.06869		1.85667	-0.000255612	0.198346	0.561836	0.718791
1.86	0.059655	1.70712	0.834897	1.06892		1.86	0.000141638	0.200588	0.560792	0.717678
1.86333	0.058293	1.71656	0.83629	1.0732		1.86333	-0.000360139	0.200873	0.560011	0.718641
1.86667	0.05771	1.72607	0.839473	1.07498		1.86667	-0.000860828	0.203451	0.56252	0.717988
1.87	0.058273	1.73598	0.838974	1.07657		1.87	-0.00179069	0.204342	0.565512	0.718393
1.87333	0.059001	1.74557	0.843881	1.07921		1.87333	-0.00181178	0.205837	0.563674	0.718913
1.87667	0.058038	1.75424	0.84609	1.08013		1.87667	-0.00307743	0.207094	0.564129	0.719169
1.88	0.060104	1.76378	0.849384	1.08232		1.88	-0.00392284	0.209079	0.566979	0.719504
1.88333	0.062552	1.77339	0.848912	1.08397		1.88333	-0.00206134	0.209919	0.566068	0.718605
1.88667	0.063957	1.781	0.851175	1.0861		1.88667	-0.000887383	0.212749	0.564262	0.719612
1.89	0.064376	1.79164	0.85015	1.08533		1.89	0.000481383	0.213355	0.56497	0.72026
1.89333	0.067498	1.80254	0.851176	1.08874		1.89333	0.00084309	0.215288	0.568224	0.722991
1.89667	0.069174	1.81102	0.852164	1.08762		1.89667	0.00108115	0.21525	0.567208	0.722965
1.9	0.070008	1.81978	0.854766	1.08844		1.9	-0.000329671	0.216724	0.568626	0.723801
1.90333	0.070622	1.8299	0.8602	1.0874		1.90333	-0.000278272	0.217076	0.571232	0.723495
1.90667	0.07134	1.83924	0.862525	1.0905		1.90667	-0.00202746	0.218936	0.572612	0.724067
1.91	0.072171	1.84639	0.864794	1.0881		1.91	-0.000667782	0.219693	0.570439	0.722413
1.91333	0.07338	1.85655	0.864853	1.08901		1.91333	-3.06977e-05	0.220796	0.571545	0.723272
1.91667	0.07393	1.86638	0.867811	1.09057		1.91667	0.00151701	0.221971	0.57455	0.724319
1.92	0.076461	1.8745	0.865081	1.09317		1.92	0.000445351	0.22524	0.573875	0.724034
1.92333	0.07764	1.88597	0.865728	1.09133		1.92333	0.00213056	0.224659	0.5738	0.724545
1.92667	0.079122	1.89635	0.867965	1.09321		1.92667	0.000287331	0.226545	0.576008	0.723906
1.93	0.079129	1.90569	0.871002	1.09445		1.93	-0.000195286	0.229622	0.578472	0.722847
1.93333	0.078746	1.91441	0.872821	1.0931		1.93333	-0.00129697	0.229664	0.574344	0.723951
1.93667	0.079571	1.92404	0.876841	1.09468		1.93667	-0.00190456	0.228616	0.5735	0.724784
1.94	0.081549	1.93382	0.87895	1.09601		1.94	-0.00408381	0.231068	0.575952	0.72389
1.94333	0.080571	1.94376	0.881495	1.0969		1.94333	-0.00399311	0.231659	0.57518	0.724886
1.94667	0.081182	1.95339	0.884827	1.09681		1.94667	-0.00268069	0.23153	0.572561	0.724898
1.95	0.083813	1.96371	0.885195	1.09937		1.95	-0.00177376	0.234738	0.574771	0.724929
1.95333	0.083744	1.97362	0.889311	1.09954		1.95333	-0.000648474	0.236912	0.578177	0.724891
1.95667	0.083122	1.98249	0.891159	1.10126		1.95667	0.000131179	0.237869	0.578039	0.726143
1.96	0.083798	1.99312	0.891169	1.10344		1.96	0.000768347	0.238845	0.577223	0.726235
1.96333	0.085768	2.00269	0.893524	1.1044		1.96333	0.000704406	0.240795	0.578936	0.726214
1.96667	0.085608	2.01409	0.894023	1.10178		1.96667	-0.000737174	0.240944	0.581184	0.726517
1.97	0.086003	2.02314	0.891783	1.10207		1.97	-0.00194578	0.242384	0.579072	0.727079
1.97333	0.086896	2.03402	0.897958	1.10422		1.97333	-0.00151524	0.244372	0.578128	0.727193
1.97667	0.0886	2.04486	0.893835	1.10643		1.97667	-0.00161506	0.247192	0.582304	0.726767
1.98	0.088307	2.05403	0.89455	1.1074		1.98	-0.00129342	0.247858	0.583937	0.726329
1.98333	0.089457	2.06221	0.898423	1.11135		1.98333	0.000352782	0.250877	0.582805	0.727191
1.98667	0.092528	2.073	0.902431	1.11358		1.98667	0.000933395	0.252336	0.583416	0.728736
1.99	0.093824	2.08341	0.900169	1.1139		1.99	0.0019688	0.254552	0.58607	0.729009
1.99333	0.094804	2.09463	0.906615	1.11232		1.99333	0.00236939	0.254907	0.583738	0.73012
1.99667	0.094586	2.10427	0.909326	1.11325		1.99667	0.00243423	0.258781	0.581523	0.731436
2	0.09594	2.11521	0.910136	1.11407		2	0.0027526	0.259749	0.582973	0.731423
2.00333	0.095044	2.12513	0.910185	1.11422		2.00333	0.00395928	0.260274	0.58526	0.730048
2.00667	0.095963	2.13394	0.907738	1.11506		2.00667	0.00267307	0.262666	0.584073	0.72951
2.01	0.096724	2.14272	0.912122	1.11739		2.01	0.0032663	0.26433	0.585857	0.72999
2.01333	0.099638	2.15444	0.911295	1.11655		2.01333	0.00168034	0.264764	0.588087	0.730274
2.01667	0.100136	2.16407	0.91437	1.11569		2.01667	0.00180511	0.265244	0.588572	0.729161
2.02	0.100912	2.17467	0.91528	1.11734		2.02	0.00196152	0.267622	0.58675	0.729303
2.02333	0.102598	2.18523	0.921453	1.1168		2.02333	0.00216723	0.268273	0.586952	0.730177
2.02667	0.105187	2.19617	0.920052	1.11836		2.02667	0.00105601	0.26881	0.58781	0.72855
2.03	0.106088	2.20594	0.923158	1.11888		2.03	0.00306739	0.27005	0.586851	0.728525
2.03333	0.10704	2.21646	0.922072	1.12289		2.03333	0.00338259	0.271018	0.583867	0.727951
2.03667	0.107552	2.22483	0.925427	1.12054		2.03667	0.0031019	0.271606	0.585472	0.728945
2.04	0.107943	2.23697	0.924272	1.12172		2.04	0.0047212	0.271663	0.588159	0.728138
2.04333	0.10865	2.24801	0.927653	1.11878		2.04333	0.0054804	0.274973	0.586848	0.728496
2.04667	0.109063	2.2577	0.926487	1.12138		2.04667	0.0047097	0.276371	0.586704	0.729292
2.05	0.110412	2.26708	0.930125	1.11896		2.05	0.0037157	0.279237	0.591491	0.731719
2.05333	0.113232	2.27937	0.930009	1.12041		2.05333	0.00471549	0.28087	0.592752	0.73039
2.05667	0.114803	2.29003	0.933026	1.12296		2.05667	0.00394402	0.282225	0.591074	0.729053
2.06	0.116055	2.29966	0.932626	1.12647		2.06	0.00390828	0.283778	0.591799	0.729821
2.06333	0.11795	2.31007	0.936831	1.12652		2.06333	0.00510531	0.28631	0.594873	0.730575
2.06667	0.119057	2.32098	0.936902	1.12854		2.06667	0.00620781	0.286503	0.594515	0.728619
2.07	0.119475	2.33024	0.941062	1.1299		2.07	0.00684666	0.289671	0.592647	0.728457
2.07333	0.121148	2.33868	0.941609	1.12961		2.07333	0.00735828	0.291603	0.593103	0.728443
2.07667	0.122474	2.35017	0.945203	1.12791		2.07667	0.00863058	0.291052	0.595035	0.727936
2.08	0.123615	2.36118	0.944771	1.12756		2.08	0.00841724	0.292095	0.59343	0.728251
2.08333	0.123385	2.37066	0.946686	1.12776		2.08333	0.0100251	0.294111	0.592942	0.729102
2.08667	0.124377	2.38232	0.947619	1.12827		2.08667	0.010056	0.295127	0.595352	0.729321
2.09	0.124939	2.39456	0.949149	1.12975		2.09	0.00974135	0.296892	0.597033	0.730677
2.09333	0.125819	2.40732	0.951746	1.13089		2.09333	0.0102594	0.299802	0.595859	0.73196
2.09667	0.126437	2.41752	0.952543	1.13275		2.09667	0.0104219	0.300165	0.596196	0.730912
2.1	0.129518	2.42864	0.951645	1.13445		2.1	0.00890674	0.303171	0.59626	0.73064
2.10333	0.13156	2.43746	0.95292	1.1351		2.10333	0.00898106	0.305347	0.596973	0.730491
2.10667	0.131632	2.44737	0.953761	1.13415		2.10667	0.00888684	0.308112	0.594203	0.730068
2.11	0.132375	2.45853	0.953122	1.1339		2.11	0.00890665	0.310049	0.594638	0.728887
2.11333	0.133937	2.46976	0.956034	1.13347		2.11333	0.0106808	0.313687	0.596627	0.728393
2.11667	0.13442	2.48057	0.957483	1.13247		2.11667	0.0103407	0.314156	0.597429	0.727929
2.12	0.133801	2.49275	0.957857	1.13292		2.12	0.0100839	0.315498	0.594877	0.727467
2.12333	0.13562	2.50345	0.959805	1.13385		2.12333	0.0115541	0.315881	0.596582	0.727324
2.12667	0.137096	2.51427	0.960999	1.13731		2.12667	0.0114785	0.317515	0.598347	0.728063
2.13	0.137612	2.52554	0.962481	1.13674		2.13	0.0110515	0.319547	0.5972	0.729178
2.13333	0.139559	2.53579	0.963451	1.13818		2.13333	0.0114512	0.321712	0.595882	0.729657
2.13667	0.140381	2.54566	0.967109	1.14012		2.13667	0.012093	0.323531	0.597743	0.729583
2.14	0.140464	2.55785	0.968131	1.14106		2.14	0.0118753	0.326714	0.599589	0.731032
2.14333	0.142356	2.56931	0.969048	1.13904		2.14333	0.0112899	0.327638	0.598723	0.730026
2.14667	0.142677	2.57739	0.968099	1.14069		2.14667	0.0120822	0.327865	0.598451	0.729734
2.15	0.143869	2.58807	0.973015	1.14102		2.15	0.0130805	0.329947	0.59841	0.728205
2.15333	0.146169	2.59786	0.973556	1.13808		2.15333	0.0129862	0.332346	0.600793	0.729606
2.15667	0.147959	2.60717	0.976148	1.13821		2.15667	0.0124638	0.332148	0.598668	0.729576
2.16	0.147448	2.61942	0.977411	1.13925		2.16	0.0141539	0.333314	0.597477	0.731405
2.16333	0.148922	2.63092	0.979456	1.14363		2.16333	0.0133866	0.334263	0.598684	0.729642
2.16667	0.148285	2.63994	0.978838	1.14455		2.16667	0.0136352	0.334862	0.601546	0.730997
2.17	0.148892	2.65085	0.980516	1.14743		2.17	0.014323	0.334861	0.598121	0.731055
2.17333	0.149284	2.66127	0.981123	1.14871		2.17333	0.0169187	0.337765	0.597819	0.730255
2.17667	0.151417	2.67262	0.98418	1.1503		2.17667	0.0159766	0.340205	0.600704	0.728945
2.18	0.152782	2.68294	0.98523	1.14837		2.18	0.0160114	0.342428	0.602449	0.728353
2.18333	0.154296	2.69513	0.986256	1.14813		2.18333	0.0163874	0.344265	0.600709	0.726737
2.18667	0.155746	2.70797	0.985548	1.14929		2.18667	0.0157059	0.347559	0.601144	0.725412
2.19	0.156841	2.71932	0.987039	1.14977		2.19	0.0148074	0.348303	0.602766	0.72668
2.19333	0.158449	2.73111	0.987475	1.15066		2.19333	0.0166494	0.349936	0.602672	0.72679
2.19667	0.159786	2.7435	0.990981	1.15078		2.19667	0.016884	0.352209	0.600785	0.727768
2.2	0.161322	2.75462	0.994341	1.1508		2.2	0.0166353	0.355191	0.600686	0.728872
2.20333	0.163002	2.76377	0.996306	1.15025		2.20333	0.0166437	0.355375	0.603479	0.72922
2.20667	0.165274	2.77423	0.9989	1.151		2.20667	0.0163847	0.35793	0.605856	0.72873
2.21	0.164698	2.78595	0.999075	1.14951		2.21	0.0158661	0.359893	0.603721	0.727068
2.21333	0.164472	2.79548	0.999786	1.15313		2.21333	0.0160474	0.360918	0.604061	0.725995
2.21667	0.16529	2.80561	0.999199	1.15355		2.21667	0.0170652	0.360684	0.606631	0.728267
2.22	0.16579	2.81719	0.998738	1.15558		2.22	0.0181255	0.363109	0.604958	0.728799
2.22333	0.167487	2.82906	0.99788	1.15536		2.22333	0.0181202	0.36505	0.604061	0.728128
2.22667	0.169799	2.83986	0.997934	1.15669		2.22667	0.0189773	0.367369	0.605207	0.728097
2.23	0.172917	2.85074	0.999906	1.15389		2.23	0.0196757	0.370415	0.607359	0.729657
2.23333	0.173879	2.86292	1.00293	1.15643		2.23333	0.0189372	0.373343	0.607909	0.728033
2.23667	0.175417	2.87306	1.0051	1.15575		2.23667	0.0184341	0.374881	0.607413	0.726928
2.24	0.175956	2.88354	1.00586	1.15696		2.24	0.0186078	0.376763	0.606425	0.725818
2.24333	0.178148	2.89721	1.00558	1.15789		2.24333	0.0175009	0.379156	0.607753	0.727182
2.24667	0.179354	2.9085	1.00373	1.15844		2.24667	0.0171865	0.380411	0.607635	0.726735
2.25	0.181769	2.91916	1.00358	1.15824		2.25	0.0179114	0.382739	0.606134	0.726641
2.25333	0.183401	2.93045	1.00567	1.16014		2.25333	0.0193387	0.385504	0.606883	0.727145
2.25667	0.185213	2.94173	1.00501	1.1586		2.25667	0.0201934	0.385285	0.608032	0.728943
2.26	0.18675	2.95201	1.00998	1.15992		2.26	0.0201592	0.386448	0.608271	0.728262
2.26333	0.187768	2.96447	1.01171	1.15829		2.26333	0.0207951	0.388641	0.608022	0.729139
2.26667	0.188904	2.9766	1.01501	1.15785		2.26667	0.0209453	0.390222	0.608194	0.727683
2.27	0.190001	2.98826	1.01595	1.15785		2.27	0.0200348	0.391405	0.608439	0.727172
2.27333	0.191164	2.99849	1.02046	1.16		2.27333	0.0204809	0.394065	0.609662	0.72539
2.27667	0.190153	3.0121	1.01962	1.15936		2.27667	0.0214126	0.396084	0.60894	0.726948
2.28	0.192215	3.02185	1.02258	1.16209		2.28	0.0214665	0.396663	0.60753	0.726156
2.28333	0.193016	3.0319	1.02248	1.16394		2.28333	0.0210324	0.398262	0.607678	0.726819
2.28667	0.193717	3.04201	1.02515	1.164		2.28667	0.0214842	0.400985	0.610746	0.727666
2.29	0.195661	3.05394	1.0249	1.16375		2.29	0.020384	0.404678	0.609439	0.729118
2.29333	0.198084	3.06281	1.02701	1.1634		2.29333	0.0211995	0.40472	0.610055	0.728113
2.29667	0.199148	3.07431	1.02638	1.16382		2.29667	0.0216396	0.406284	0.610942	0.728326
2.3	0.200899	3.08584	1.02585	1.16196		2.3	0.0222909	0.408014	0.612662	0.728583
2.30333	0.202557	3.09724	1.02688	1.16343		2.30333	0.0233111	0.409565	0.611338	0.727787
2.30667	0.202803	3.10799	1.03006	1.16414		2.30667	0.0243382	0.41012	0.610041	0.728299
2.31	0.204365	3.12128	1.03105	1.16558		2.31	0.0239145	0.413202	0.609118	0.727466
2.31333	0.205557	3.13164	1.03185	1.16549		2.31333	0.0231918	0.416281	0.609849	0.728332
2.31667	0.207028	3.14293	1.03415	1.16726		2.31667	0.0238216	0.419068	0.610575	0.728242
2.32	0.208116	3.15337	1.03259	1.16698		2.32	0.0241321	0.421397	0.608579	0.728673
2.32333	0.210878	3.16342	1.03112	1.16869		2.32333	0.0244811	0.423147	0.608952	0.726008
2.32667	0.212822	3.17602	1.0337	1.1693		2.32667	0.024678	0.424041	0.610966	0.725963
2.33	0.212146	3.1887	1.03383	1.16984		2.33	0.0249192	0.426826	0.611085	0.725981
2.33333	0.214095	3.19963	1.03475	1.17079		2.33333	0.0247987	0.428075	0.608116	0.726126
2.33667	0.214437	3.2117	1.03511	1.16863		2.33667	0.0239202	0.428732	0.608644	0.726246
2.34	0.214882	3.22344	1.03439	1.16912		2.34	0.0238244	0.429741	0.610128	0.727168
2.34333	0.216118	3.23332	1.0345	1.17063		2.34333	0.0247057	0.433154	0.611414	0.727324
2.34667	0.218372	3.24438	1.03871	1.16999		2.34667	0.0252853	0.434774	0.61066	0.727139
2.35	0.218665	3.25557	1.03778	1.1708		2.35	0.0268695	0.436354	0.610372	0.726782
2.35333	0.222059	3.26661	1.04044	1.17275		2.35333	0.0259151	0.439926	0.611031	0.725863
2.35667	0.223203	3.27912	1.04552	1.17352		2.35667	0.0280707	0.442222	0.611694	0.727554
2.36	0.22471	3.29272	1.04804	1.17298		2.36	0.0277843	0.444705	0.610293	0.729208
2.36333	0.227522	3.30303	1.04712	1.17231		2.36333	0.0284539	0.446694	0.610522	0.727393
2.36667	0.227879	3.31338	1.04944	1.17271		2.36667	0.0272949	0.449741	0.612083	0.727224
2.37	0.22803	3.32609	1.0493	1.17283		2.37	0.0281985	0.45032	0.613881	0.727324
2.37333	0.231609	3.33595	1.05042	1.17092		2.37333	0.0271678	0.453467	0.614806	0.726727
2.37667	0.233903	3.3478	1.04884	1.1731		2.37667	0.0258975	0.453861	0.613682	0.724773
2.38	0.235456	3.35949	1.05161	1.17474		2.38	0.0249899	0.456216	0.614837	0.72523
2.38333	0.239114	3.37015	1.05488	1.17471		2.38333	0.0258124	0.458335	0.615188	0.725599
2.38667	0.241606	3.38211	1.0576	1.17284		2.38667	0.0269323	0.460934	0.616094	0.725795
2.39	0.240841	3.39388	1.05723	1.17552		2.39	0.0267627	0.462854	0.615724	0.724704
2.39333	0.242367	3.40572	1.05858	1.17286		2.39333	0.0285361	0.46589	0.615198	0.725374
2.39667	0.244082	3.41652	1.05834	1.17366		2.39667	0.0313124	0.466467	0.615196	0.725941
2.4	0.24392	3.42817	1.05887	1.17505		2.4	0.0303608	0.466868	0.615852	0.725623
2.40333	0.24646	3.43663	1.05853	1.17871		2.40333	0.0318374	0.469681	0.615417	0.724373
2.40667	0.248015	3.44608	1.05804	1.17757		2.40667	0.0327103	0.472242	0.612942	0.72581
2.41	0.250651	3.45779	1.05685	1.17902		2.41	0.0332971	0.473298	0.612824	0.72574
2.41333	0.252245	3.46895	1.05912	1.17965		2.41333	0.0315302	0.476196	0.612862	0.723217
2.41667	0.255742	3.48181	1.05738	1.17758		2.41667	0.0322194	0.478378	0.613371	0.724458
2.42	0.255494	3.4944	1.06033	1.17888		2.42	0.0304143	0.479705	0.610429	0.725937
2.42333	0.256982	3.50718	1.06117	1.18026		2.42333	0.0304084	0.482221	0.611779	0.723228
2.42667	0.258666	3.51994	1.06523	1.18038		2.42667	0.0298043	0.485078	0.612828	0.722876
2.43	0.260404	3.52957	1.06209	1.18072		2.43	0.0302373	0.48699	0.613437	0.72488
2.43333	0.26051	3.53977	1.0647	1.1807		2.43333	0.0291648	0.489497	0.614584	0.724461
2.43667	0.263158	3.55002	1.06498	1.17895		2.43667	0.0288769	0.490489	0.613917	0.722919
2.44	0.264401	3.56146	1.06761	1.17799		2.44	0.0293543	0.49084	0.613495	0.723705
2.44333	0.266539	3.57269	1.06782	1.17906		2.44333	0.0305158	0.493359	0.614278	0.723816
2.44667	0.268174	3.58394	1.07137	1.17774		2.44667	0.0303022	0.494946	0.615185	0.724361
2.45	0.272095	3.59507	1.07011	1.18159		2.45	0.0317446	0.496528	0.613253	0.722985
2.45333	0.272764	3.60634	1.07255	1.18148		2.45333	0.0347008	0.499841	0.614912	0.723901
2.45667	0.274079	3.6165	1.07353	1.18203		2.45667	0.0332282	0.502311	0.614942	0.725002
2.46	0.274453	3.62985	1.07463	1.18048		2.46	0.0336509	0.504156	0.615929	0.724497
2.46333	0.274404	3.64265	1.0747	1.18288		2.46333	0.0344872	0.507167	0.613607	0.722497
2.46667	0.273321	3.65284	1.07665	1.17949		2.46667	0.0347243	0.509691	0.612637	0.723573
2.47	0.274446	3.66428	1.07394	1.18223		2.47	0.0335697	0.511692	0.61209	0.723321
2.47333	0.276228	3.67501	1.07554	1.18413		2.47333	0.0353451	0.512041	0.613434	0.723254
2.47667	0.279614	3.68649	1.07383	1.18495		2.47667	0.0350773	0.513472	0.61259	0.723677
2.48	0.281439	3.6961	1.07415	1.18442		2.48	0.0346228	0.514981	0.612589	0.724848
2.48333	0.28288	3.70945	1.07476	1.18516		2.48333	0.0340229	0.517385	0.612584	0.724962
2.48667	0.285362	3.72101	1.07757	1.18403		2.48667	0.0342989	0.518805	0.613314	0.724544
2.49	0.287815	3.73211	1.07736	1.18349		2.49	0.0350045	0.523038	0.612848	0.723141
2.49333	0.286728	3.7425	1.08049	1.18169		2.49333	0.0356119	0.524864	0.61533	0.723773
2.49667	0.288575	3.75558	1.08241	1.18329		2.49667	0.0377857	0.526699	0.61369	0.722687
2.5	0.290856	3.76586	1.085	1.18515		2.5	0.0397652	0.527888	0.613955	0.718982
2.50333	0.292169	3.77527	1.08331	1.18532		2.50333	0.0399276	0.529373	0.614407	0.718876
2.50667	0.293278	3.7868	1.08355	1.18563		2.50667	0.0394579	0.530281	0.616007	0.720497
2.51	0.295731	3.80121	1.08369	1.18873		2.51	0.0387459	0.534472	0.615384	0.719012
2.51333	0.298939	3.81197	1.08547	1.18739		2.51333	0.0376398	0.536457	0.616391	0.717247
2.51667	0.299937	3.82175	1.08711	1.18613		2.51667	0.0366077	0.537978	0.615942	0.718698
2.52	0.302412	3.8344	1.09031	1.18689		2.52	0.0378828	0.541053	0.616145	0.718508
2.52333	0.303784	3.8466	1.09182	1.18608		2.52333	0.0383566	0.543274	0.615393	0.717094
2.52667	0.305279	3.85738	1.09404	1.18504		2.52667	0.0397236	0.542638	0.613146	0.716804
2.53	0.306217	3.86809	1.09149	1.18844		2.53	0.0405682	0.544505	0.612011	0.717728
2.53333	0.309221	3.87938	1.09074	1.19079		2.53333	0.0420955	0.548302	0.612033	0.718998
2.53667	0.310253	3.89044	1.09172	1.19074		2.53667	0.0419469	0.551787	0.612359	0.719047
2.54	0.311986	3.90078	1.09355	1.1919		2.54	0.0430903	0.555808	0.611354	0.718252
2.54333	0.314895	3.91299	1.09215	1.19297		2.54333	0.0433364	0.559793	0.611399	0.718952
2.54667	0.317736	3.92347	1.09633	1.19076		2.54667	0.0433992	0.562455	0.613077	0.720056
2.55	0.318523	3.93483	1.09584	1.18953		2.55	0.0430128	0.564956	0.61342	0.719642
2.55333	0.320765	3.94534	1.09252	1.1911		2.55333	0.042242	0.564718	0.614349	0.718205
2.55667	0.322588	3.95482	1.09381	1.19399		2.55667	0.041133	0.566976	0.614889	0.718155
2.56	0.32353	3.96653	1.09395	1.19541		2.56	0.0409793	0.569493	0.615133	0.71812
2.56333	0.323563	3.97816	1.09547	1.19453		2.56333	0.0412169	0.571361	0.615651	0.717703
2.56667	0.323824	3.98913	1.09696	1.1965		2.56667	0.0411769	0.573022	0.615524	0.715385
2.57	0.324155	4.0003	1.10225	1.19278		2.57	0.0430513	0.576552	0.614858	0.716874
2.57333	0.324992	4.0132	1.09933	1.19279		2.57333	0.0429268	0.577167	0.614985	0.717256
2.57667	0.32628	4.0256	1.10208	1.19094		2.57667	0.042572	0.57831	0.613835	0.715212
2.58	0.328197	4.03535	1.1009	1.19272		2.58	0.0424768	0.580405	0.612823	0.713428
2.58333	0.332436	4.04633	1.10324	1.19145		2.58333	0.0444907	0.582636	0.612685	0.717149
2.58667	0.334408	4.05583	1.10258	1.19407		2.58667	0.0446499	0.584532	0.613573	0.716765
2.59	0.337432	4.06585	1.10663	1.19224		2.59	0.0458257	0.586968	0.613677	0.715495
2.59333	0.338953	4.07719	1.10525	1.19546		2.59333	0.0460762	0.589887	0.613361	0.715774
2.59667	0.340827	4.08885	1.10371	1.19575		2.59667	0.0477103	0.593607	0.614082	0.718025
2.6	0.342901	4.09933	1.10423	1.19735		2.6	0.0460066	0.595058	0.616028	0.716078
2.60333	0.344988	4.11173	1.10501	1.1973		2.60333	0.0452396	0.598661	0.614961	0.715752
2.60667	0.345409	4.12325	1.10439	1.19695		2.60667	0.0447892	0.601321	0.615936	0.717056
2.61	0.347203	4.1346	1.10626	1.19486		2.61	0.0465865	0.603933	0.61555	0.718556
2.61333	0.349258	4.14525	1.10967	1.19578		2.61333	0.0468812	0.605598	0.615602	0.716703
2.61667	0.349065	4.15719	1.10786	1.1956		2.61667	0.0484155	0.608755	0.614964	0.714985
2.62	0.351391	4.16811	1.10863	1.19842		2.62	0.0491705	0.610709	0.615109	0.714472
2.62333	0.354568	4.17902	1.10819	1.19794		2.62333	0.0508718	0.61138	0.613155	0.713723
2.62667	0.357126	4.19066	1.10948	1.1987		2.62667	0.0491724	0.613307	0.613468	0.712851
2.63	0.357866	4.20152	1.10889	1.19827		2.63	0.0489455	0.615109	0.613864	0.713382
2.63333	0.360104	4.21309	1.11233	1.19893		2.63333	0.0487724	0.616045	0.615235	0.715242
2.63667	0.360147	4.22418	1.1141	1.19959		2.63667	0.050525	0.616622	0.614785	0.715748
2.64	0.361496	4.23465	1.11543	1.20123		2.64	0.050478	0.620835	0.615229	0.715349
2.64333	0.361952	4.2466	1.11583	1.2026		2.64333	0.051502	0.622338	0.614429	0.71567
2.64667	0.364764	4.25803	1.11893	1.20186		2.64667	0.0508129	0.62558	0.614347	0.715996
2.65	0.365541	4.26657	1.11838	1.20147		2.65	0.0523171	0.6276	0.613686	0.715822
2.65333	0.369384	4.27636	1.11852	1.20034		2.65333	0.0504679	0.631285	0.614683	0.714332
2.65667	0.369368	4.28707	1.11967	1.19806		2.65667	0.0510585	0.632023	0.6149	0.71532
2.66	0.370994	4.2989	1.11953	1.19791		2.66	0.0532058	0.633624	0.61644	0.716176
2.66333	0.371881	4.30947	1.1183	1.19684		2.66333	0.055466	0.634596	0.616181	0.714981
2.66667	0.375022	4.32068	1.11867	1.19995		2.66667	0.0545555	0.638098	0.615345	0.71447
2.67	0.374677	4.33132	1.12309	1.1984		2.67	0.0560211	0.640348	0.614888	0.716536
2.67333	0.377826	4.3427	1.12236	1.19986		2.67333	0.0564647	0.643664	0.614554	0.717257
2.67667	0.381597	4.35388	1.12377	1.19985		2.67667	0.0548675	0.64747	0.613883	0.715618
2.68	0.384615	4.36345	1.1299	1.20238		2.68	0.0542347	0.650571	0.614689	0.714715
2.68333	0.387704	4.37438	1.13014	1.20078		2.68333	0.0550168	0.652475	0.615219	0.716344
2.68667	0.390006	4.38446	1.12528	1.20164		2.68667	0.0551366	0.653302	0.615448	0.713783
2.69	0.391897	4.39506	1.12729	1.20181		2.69	0.0555941	0.654795	0.614953	0.711269
2.69333	0.394081	4.40653	1.13072	1.20046		2.69333	0.056457	0.656531	0.614352	0.712459
2.69667	0.393748	4.41761	1.12677	1.20118		2.69667	0.056669	0.658859	0.613749	0.714917
2.7	0.395003	4.42681	1.12851	1.20167		2.7	0.0565228	0.661385	0.614416	0.711027
2.70333	0.39692	4.43835	1.12999	1.20183		2.70333	0.0581483	0.664682	0.612053	0.713522
2.70667	0.397863	4.44766	1.12937	1.20222		2.70667	0.0586645	0.668298	0.611466	0.715084
2.71	0.397797	4.45927	1.12654	1.20354		2.71	0.0591795	0.672364	0.612748	0.712668
2.71333	0.402364	4.47114	1.12763	1.20669		2.71333	0.0599523	0.674833	0.612829	0.711017
2.71667	0.402025	4.48269	1.12967	1.20556		2.71667	0.0613882	0.677225	0.612071	0.713066
2.72	0.404507	4.49352	1.13073	1.20409		2.72	0.059589	0.680132	0.614269	0.710995
2.72333	0.406942	4.50489	1.13462	1.20653		2.72333	0.0594544	0.681473	0.613629	0.70957
2.72667	0.409477	4.51384	1.13458	1.20827		2.72667	0.0599642	0.68267	0.613167	0.710174
2.73	0.409965	4.52573	1.13274	1.20541		2.73	0.0599895	0.685711	0.614068	0.709355
2.73333	0.413463	4.53627	1.13504	1.20516		2.73333	0.0604416	0.689137	0.613808	0.708789
2.73667	0.414555	4.54751	1.13592	1.20913		2.73667	0.0617448	0.691428	0.613096	0.710034
2.74	0.415175	4.55621	1.13539	1.2049		2.74	0.061302	0.696008	0.612835	0.711059
2.74333	0.417552	4.56724	1.13546	1.2047		2.74333	0.0601383	0.697785	0.614104	0.711176
2.74667	0.421091	4.5792	1.13886	1.204		2.74667	0.0611869	0.699986	0.612552	0.711614
2.75	0.422713	4.59062	1.13621	1.20551		2.75	0.0600227	0.701408	0.614005	0.711876
2.75333	0.425298	4.6002	1.13476	1.2056		2.75333	0.0601124	0.704254	0.614722	0.71179
2.75667	0.428825	4.61148	1.13362	1.20657		2.75667	0.0610708	0.704879	0.616033	0.710246
2.76	0.429462	4.62116	1.13537	1.20518		2.76	0.0618215	0.709	0.615109	0.710224
2.76333	0.430512	4.63145	1.13453	1.20445		2.76333	0.061535	0.711255	0.616	0.712173
2.76667	0.431643	4.64069	1.13577	1.20428		2.76667	0.0633699	0.713565	0.614299	0.711966
2.77	0.433329	4.65003	1.13813	1.20109		2.77	0.0640316	0.714751	0.614079	0.711217
2.77333	0.43543	4.6615	1.13662	1.20573		2.77333	0.0648693	0.718256	0.614363	0.712131
2.77667	0.43769	4.67179	1.13774	1.20495		2.77667	0.0652649	0.720316	0.613034	0.712202
2.78	0.438672	4.68213	1.13802	1.20739		2.78	0.0646862	0.723303	0.61271	0.71004
2.78333	0.440131	4.69264	1.13807	1.20684		2.78333	0.0642893	0.725773	0.613564	0.709683
2.78667	0.441596	4.70379	1.13684	1.20901		2.78667	0.0636787	0.729647	0.61252	0.711325
2.79	0.440975	4.71365	1.14107	1.20593		2.79	0.0639978	0.730844	0.611837	0.710649
2.79333	0.442594	4.72403	1.14003	1.20813		2.79333	0.0652923	0.734801	0.613529	0.709442
2.79667	0.446076	4.7333	1.14039	1.20845		2.79667	0.0662185	0.737127	0.615016	0.710952
2.8	0.448946	4.74271	1.13894	1.20946		2.8	0.0669879	0.740338	0.614477	0.711278
2.80333	0.450376	4.75333	1.14177	1.20833		2.80333	0.0692168	0.742266	0.615325	0.708959
2.80667	0.454588	4.76339	1.13991	1.2101		2.80667	0.0689523	0.745974	0.615471	0.708724
2.81	0.457089	4.77465	1.14272	1.20911		2.81	0.0689589	0.747612	0.614749	0.710257
2.81333	0.458397	4.78753	1.14196	1.20877		2.81333	0.0704966	0.749337	0.614703	0.709231
2.81667	0.459731	4.79861	1.14429	1.20622		2.81667	0.0711366	0.75093	0.614963	0.707824
2.82	0.462308	4.80662	1.14184	1.20828		2.82	0.0695774	0.753726	0.6137	0.70933
2.82333	0.463327	4.81597	1.14398	1.20756		2.82333	0.0706567	0.755264	0.613921	0.71071
2.82667	0.464581	4.82765	1.14349	1.20943		2.82667	0.0706637	0.756663	0.614634	0.710178
2.83	0.466191	4.83632	1.14648	1.20882		2.83	0.0692059	0.759142	0.613949	0.710727
2.83333	0.46861	4.84581	1.1461	1.20996		2.83333	0.0682754	0.762401	0.614206	0.711923
2.83667	0.469659	4.85791	1.14897	1.2087		2.83667	0.0696204	0.764635	0.61569	0.711057
2.84	0.472142	4.86967	1.14782	1.2089		2.84	0.0690375	0.767366	0.614962	0.709535
2.84333	0.474504	4.87948	1.14903	1.2087		2.84333	0.0706293	0.77001	0.612444	0.710325
2.84667	0.476549	4.89127	1.1479	1.21066		2.84667	0.0736374	0.772482	0.612373	0.709798
2.85	0.478544	4.90227	1.15058	1.21382		2.85	0.0745082	0.776743	0.612074	0.708542
2.85333	0.481164	4.9118	1.15072	1.2132		2.85333	0.074038	0.778188	0.610952	0.708473
2.85667	0.481947	4.92102	1.15272	1.21321		2.85667	0.0755626	0.781827	0.612309	0.709802
2.86	0.483769	4.92936	1.15125	1.21254		2.86	0.075759	0.78562	0.612235	0.708052
2.86333	0.486975	4.94068	1.15328	1.2126		2.86333	0.0742547	0.789153	0.611662	0.708978
2.86667	0.488319	4.94901	1.15292	1.21005		2.86667	0.0743634	0.790176	0.611281	0.711231
2.87	0.491069	4.95842	1.15352	1.2127		2.87	0.0762918	0.794866	0.611396	0.711116
2.87333	0.492383	4.96844	1.15531	1.21197		2.87333	0.0752345	0.798203	0.609154	0.709104
2.87667	0.49361	4.97935	1.15719	1.21324		2.87667	0.0756024	0.801491	0.610615	0.709768
2.88	0.495617	4.98796	1.15717	1.21157		2.88	0.0757449	0.803249	0.609539	0.708421
2.88333	0.497687	4.99869	1.15687	1.21337		2.88333	0.0764568	0.803796	0.610251	0.705093
2.88667	0.499004	5.00997	1.15798	1.21178		2.88667	0.0751	0.80694	0.610503	0.705409
2.89	0.503009	5.01897	1.15645	1.21232		2.89	0.076157	0.807816	0.612037	0.705875
2.89333	0.505499	5.02898	1.15774	1.21159		2.89333	0.0750588	0.80984	0.612103	0.705283
2.89667	0.507449	5.04127	1.15997	1.21221		2.89667	0.075606	0.812661	0.612654	0.704789
2.9	0.509959	5.05046	1.16177	1.21277		2.9	0.0760532	0.817586	0.610658	0.706829
2.90333	0.511392	5.05816	1.16177	1.21486		2.90333	0.0768692	0.819466	0.610825	0.706244
2.90667	0.512229	5.06803	1.16302	1.21349		2.90667	0.077216	0.823672	0.61072	0.706673
2.91	0.514808	5.07822	1.16061	1.21375		2.91	0.0788198	0.826128	0.611929	0.707144
2.91333	0.517464	5.08584	1.16073	1.21483		2.91333	0.0800612	0.829188	0.610228	0.708117
2.91667	0.518577	5.09542	1.16045	1.21365		2.91667	0.0810045	0.830726	0.611532	0.706344
2.92	0.521896	5.10511	1.16169	1.21148		2.92	0.0812804	0.832503	0.611889	0.706248
2.92333	0.526802	5.11392	1.16275	1.21384		2.92333	0.0836305	0.8348	0.61119	0.707078
2.92667	0.529801	5.12288	1.16485	1.21603		2.92667	0.0848555	0.836669	0.609029	0.706047
2.93	0.531395	5.1334	1.16342	1.21396		2.93	0.0846506	0.839135	0.60922	0.705837
2.93333	0.534456	5.14395	1.16599	1.21367		2.93333	0.0848729	0.842949	0.607657	0.708209
2.93667	0.536422	5.15257	1.16814	1.21319		2.93667	0.0855783	0.845081	0.607122	0.70874
2.94	0.53678	5.16318	1.16932	1.21272		2.94	0.0839111	0.847394	0.60753	0.706969
2.94333	0.536724	5.17493	1.16959	1.21341		2.94333	0.0835818	0.84926	0.609089	0.706406
2.94667	0.539058	5.18378	1.17195	1.21532		2.94667	0.0846215	0.851065	0.607943	0.705639
2.95	0.541346	5.19265	1.16894	1.21544		2.95	0.0848789	0.854219	0.606224	0.702924
2.95333	0.54266	5.20343	1.16754	1.21774		2.95333	0.0855868	0.857653	0.606924	0.70146
2.95667	0.543168	5.21313	1.16842	1.21567		2.95667	0.0870081	0.859337	0.608746	0.702829
2.96	0.544868	5.22064	1.16928	1.21311		2.96	0.0864746	0.861918	0.608761	0.70379
2.96333	0.54918	5.23245	1.16891	1.21329		2.96333	0.086458	0.866378	0.609636	0.703954
2.96667	0.550113	5.24124	1.17266	1.21416		2.96667	0.086095	0.866319	0.609945	0.704782
2.97	0.553146	5.24966	1.1691	1.21389		2.97	0.0863126	0.868919	0.60833	0.705673
2.97333	0.556475	5.25856	1.17532	1.21714		2.97333	0.0861383	0.871279	0.608208	0.703361
2.97667	0.560841	5.26758	1.17076	1.2168		2.97667	0.0865236	0.873142	0.608356	0.7028
2.98	0.561374	5.27591	1.17435	1.21728		2.98	0.0874354	0.874706	0.608586	0.702686
2.98333	0.564531	5.28575	1.17301	1.21648		2.98333	0.0885471	0.878464	0.608873	0.702311
2.98667	0.566448	5.29466	1.17776	1.21749		2.98667	0.0892024	0.881634	0.607423	0.700741
2.99	0.568545	5.3033	1.16827	1.21673		2.99	0.090489	0.884451	0.605578	0.701521
2.99333	0.569594	5.31284	1.17468	1.2159		2.99333	0.0923463	0.887232	0.605548	0.700234
2.99667	0.57003	5.32421	1.17048	1.21409		2.99667	0.0920444	0.890668	0.607479	0.699002
3	0.571514	5.33242	1.17266	1.21676		3	0.0926431	0.894142	0.607778	0.699015
3.00333	0.572914	5.3421	1.17137	1.21543		3.00333	0.093191	0.896789	0.60751	0.698387
3.00667	0.576787	5.35022	1.17426	1.21729		3.00667	0.092815	0.90117	0.606562	0.69738
3.01	0.578673	5.35952	1.17394	1.21967		3.01	0.0932604	0.905202	0.606874	0.698285
3.01333	0.582557	5.37015	1.17405	1.22153		3.01333	0.0932472	0.907439	0.606408	0.698052
3.01667	0.584476	5.38028	1.17373	1.21963		3.01667	0.0938352	0.909413	0.606622	0.69599
3.02	0.58616	5.38918	1.17512	1.2187		3.02	0.0940784	0.912889	0.607091	0.69746
3.02333	0.586964	5.39848	1.17308	1.21566		3.02333	0.0950965	0.914855	0.608038	0.698255
3.02667	0.590038	5.40688	1.17528	1.21743		3.02667	0.0956657	0.917743	0.605239	0.697355
3.03	0.591146	5.41641	1.17605	1.2171		3.03	0.0974225	0.920805	0.606275	0.69763
3.03333	0.594455	5.42505	1.17507	1.21855		3.03333	0.097299	0.922958	0.606623	0.698828
3.03667	0.597521	5.4337	1.1768	1.21883		3.03667	0.0980025	0.924715	0.605789	0.697292
3.04	0.600513	5.44443	1.17794	1.22047		3.04	0.0975267	0.927304	0.605714	0.696912
3.04333	0.601666	5.4523	1.17471	1.2192		3.04333	0.0974129	0.930632	0.606424	0.69707
3.04667	0.605733	5.4609	1.1785	1.21824		3.04667	0.0974883	0.933249	0.604432	0.696537
3.05	0.607498	5.46915	1.17889	1.21841		3.05	0.098118	0.936854	0.605081	0.695136
3.05333	0.608591	5.47856	1.17788	1.21788		3.05333	0.098241	0.938601	0.607364	0.696422
3.05667	0.609455	5.48533	1.17776	1.21912		3.05667	0.0994428	0.941765	0.607144	0.695768
3.06	0.612301	5.49467	1.1801	1.21956		3.06	0.0998678	0.944213	0.606957	0.694753
3.06333	0.612747	5.50317	1.17777	1.22027		3.06333	0.100355	0.94664	0.604878	0.694607
3.06667	0.614655	5.5119	1.17836	1.21689		3.06667	0.100668	0.948493	0.603436	0.695852
3.07	0.617796	5.52008	1.18031	1.21808		3.07	0.100745	0.952809	0.601972	0.693975
3.07333	0.62217	5.53022	1.18357	1.218		3.07333	0.0999456	0.955604	0.604093	0.694836
3.07667	0.622428	5.53896	1.18363	1.21681		3.07667	0.101086	0.958521	0.604364	0.694955
3.08	0.62694	5.54715	1.18177	1.21843		3.08	0.101451	0.961051	0.604705	0.694724
3.08333	0.628612	5.55469	1.18235	1.22271		3.08333	0.101593	0.963237	0.603949	0.694166
3.08667	0.632063	5.56376	1.17974	1.22365		3.08667	0.100805	0.965223	0.603386	0.694476
3.09	0.632377	5.5716	1.18113	1.22108		3.09	0.10142	0.968225	0.60128	0.691604
3.09333	0.636822	5.58027	1.17873	1.22209		3.09333	0.10129	0.970667	0.602993	0.690859
3.09667	0.638107	5.58957	1.18264	1.21872		3.09667	0.101128	0.974239	0.602863	0.692097
3.1	0.64074	5.59941	1.17988	1.2182		3.1	0.101563	0.978032	0.601241	0.691212
3.10333	0.642053	5.60877	1.18129	1.21837		3.10333	0.10385	0.982196	0.601141	0.690806
3.10667	0.645442	5.61831	1.17944	1.21969		3.10667	0.103935	0.985469	0.600943	0.693887
3.11	0.647908	5.62813	1.18438	1.21794		3.11	0.10374	0.988026	0.599944	0.693514
3.11333	0.651434	5.63772	1.18347	1.22176		3.11333	0.105439	0.990593	0.602566	0.691686
3.11667	0.653963	5.64571	1.18705	1.21846		3.11667	0.107213	0.994815	0.604207	0.692324
3.12	0.655966	5.65391	1.18561	1.21855		3.12	0.108498	0.997089	0.603592	0.692453
3.12333	0.657358	5.66068	1.18555	1.22046		3.12333	0.109117	1.00001	0.601729	0.689897
3.12667	0.659174	5.66869	1.18268	1.22128		3.12667	0.109384	1.00443	0.600934	0.691497
3.13	0.660091	5.67777	1.18205	1.2212		3.13	0.107878	1.00802	0.599331	0.693133
3.13333	0.661846	5.68531	1.18386	1.22333		3.13333	0.107467	1.01298	0.599346	0.692296
3.13667	0.664181	5.69381	1.18554	1.22335		3.13667	0.106951	1.01374	0.600277	0.691901
3.14	0.666134	5.7018	1.18496	1.22324		3.14	0.108324	1.0149	0.601412	0.692816
3.14333	0.668102	5.71083	1.18615	1.22488		3.14333	0.108961	1.01724	0.600896	0.691195
3.14667	0.672088	5.71952	1.18549	1.22364		3.14667	0.110751	1.01968	0.60114	0.68917
3.15	0.674833	5.72776	1.18509	1.22346		3.15	0.111023	1.01929	0.600964	0.690521
3.15333	0.677031	5.73387	1.18743	1.22231		3.15333	0.111511	1.02465	0.602822	0.688991
3.15667	0.67946	5.74235	1.18859	1.22155		3.15667	0.111332	1.02929	0.602991	0.688892
3.16	0.681097	5.74947	1.18772	1.21995		3.16	0.11192	1.03254	0.602456	0.690509
3.16333	0.682525	5.75767	1.1881	1.21919		3.16333	0.112051	1.03549	0.600983	0.689777
3.16667	0.685166	5.76711	1.18755	1.21823		3.16667	0.111927	1.03884	0.600507	0.687479
3.17	0.68705	5.7764	1.18677	1.21864		3.17	0.112426	1.04069	0.599115	0.689848
3.17333	0.688843	5.78488	1.18357	1.21958		3.17333	0.112491	1.0437	0.598743	0.690095
3.17667	0.693337	5.79366	1.19142	1.22161		3.17667	0.112349	1.04575	0.601296	0.687381
3.18	0.695704	5.80328	1.19488	1.22204		3.18	0.11299	1.04885	0.601932	0.68748
3.18333	0.697545	5.81165	1.19407	1.22328		3.18333	0.112801	1.05193	0.60139	0.688337
3.18667	0.699973	5.81703	1.19433	1.22261		3.18667	0.112582	1.05502	0.601342	0.686036
3.19	0.701481	5.82515	1.19989	1.22339		3.19	0.114063	1.05792	0.600452	0.684558
3.19333	0.701931	5.83154	1.19354	1.22064		3.19333	0.114764	1.06134	0.599192	0.685019
3.19667	0.7056	5.83996	1.19173	1.22199		3.19667	0.115724	1.06466	0.599895	0.68393
3.2	0.707186	5.84615	1.19204	1.22114		3.2	0.118084	1.06769	0.60109	0.68415
3.20333	0.707873	5.85682	1.1926	1.2245		3.20333	0.120168	1.06972	0.599383	0.683812
3.20667	0.712043	5.86208	1.19263	1.22346		3.20667	0.1212	1.07255	0.599726	0.683045
3.21	0.714855	5.87012	1.19319	1.22591		3.21	0.12087	1.07489	0.597905	0.68298
3.21333	0.715252	5.87787	1.19554	1.22399		3.21333	0.119395	1.07843	0.599367	0.683467
3.21667	0.718476	5.88555	1.19804	1.22477		3.21667	0.119314	1.08263	0.600774	0.681384
3.22	0.721844	5.8925	1.19702	1.22174		3.22	0.118824	1.08481	0.601512	0.682572
3.22333	0.722865	5.90209	1.19457	1.22126		3.22333	0.117998	1.08702	0.600702	0.683783
3.22667	0.724408	5.90949	1.19674	1.22157		3.22667	0.120249	1.09194	0.599379	0.68282
3.23	0.728672	5.91789	1.196	1.22298		3.23	0.121829	1.09429	0.596407	0.682772
3.23333	0.730181	5.92553	1.19466	1.2237		3.23333	0.121781	1.09599	0.594257	0.683949
3.23667	0.732329	5.93242	1.19731	1.22487		3.23667	0.120903	1.09976	0.596858	0.682204
3.24	0.736681	5.94016	1.19818	1.22733		3.24	0.121103	1.10361	0.599189	0.6813
3.24333	0.740974	5.94777	1.1986	1.22668		3.24333	0.119997	1.10553	0.60061	0.683666
3.24667	0.742638	5.95492	1.19653	1.22692		3.24667	0.121002	1.10906	0.600787	0.681489
3.25	0.744783	5.96189	1.19858	1.22579		3.25	0.122195	1.11297	0.602113	0.681761
3.25333	0.747441	5.96956	1.19971	1.22682		3.25333	0.124157	1.11632	0.597673	0.682851
3.25667	0.748834	5.97561	1.19959	1.22509		3.25667	0.124664	1.11842	0.596654	0.68141
3.26	0.749417	5.98254	1.19527	1.22313		3.26	0.12594	1.12247	0.598582	0.67895
3.26333	0.753062	5.99142	1.20585	1.223		3.26333	0.125536	1.12457	0.598803	0.68047
3.26667	0.757196	5.99854	1.20401	1.22606		3.26667	0.126448	1.12869	0.598147	0.680356
3.27	0.760589	6.00467	1.20286	1.22545		3.27	0.12651	1.13158	0.598672	0.680442
3.27333	0.763976	6.01167	1.20593	1.22411		3.27333	0.128413	1.13616	0.597755	0.681143
3.27667	0.766445	6.0195	1.20942	1.22542		3.27667	0.129072	1.13815	0.595897	0.681143
3.28	0.768345	6.02592	1.20248	1.22465		3.28	0.128609	1.14224	0.59704	0.68098
3.28333	0.768528	6.03491	1.20216	1.22239		3.28333	0.129612	1.14368	0.597146	0.680025
3.28667	0.769797	6.04353	1.19961	1.22236		3.28667	0.129769	1.14716	0.596389	0.679604
3.29	0.769597	6.05217	1.19727	1.22312		3.29	0.12889	1.14957	0.595321	0.678478
3.29333	0.773258	6.0593	1.19794	1.22342		3.29333	0.130102	1.15369	0.595136	0.679054
3.29667	0.775353	6.06772	1.20043	1.2234		3.29667	0.13201	1.1571	0.592132	0.680113
3.3	0.778612	6.07303	1.20119	1.2228		3.3	0.130621	1.16059	0.591673	0.679064
3.30333	0.782324	6.08031	1.20417	1.22272		3.30333	0.131871	1.16376	0.594153	0.678498
3.30667	0.784644	6.0865	1.20528	1.22328		3.30667	0.133037	1.1664	0.594715	0.680198
3.31	0.785838	6.09333	1.20306	1.224		3.31	0.131651	1.1689	0.593218	0.679148
3.31333	0.789224	6.10001	1.20171	1.22645		3.31333	0.131321	1.1703	0.593708	0.676104
3.31667	0.792967	6.10882	1.20342	1.22653		3.31667	0.133346	1.17363	0.591087	0.677549
3.32	0.794823	6.11589	1.20291	1.22629		3.32	0.133737	1.17637	0.588772	0.676607
3.32333	0.79871	6.1232	1.20398	1.22736		3.32333	0.133987	1.17916	0.589363	0.675509
3.32667	0.802029	6.12923	1.20528	1.22771		3.32667	0.135781	1.18141	0.592478	0.675272
3.33	0.805271	6.13721	1.207	1.22681		3.33	0.13626	1.18602	0.593642	0.677446
3.33333	0.805779	6.14248	1.20501	1.22842		3.33333	0.135819	1.18799	0.593748	0.674787
3.33667	0.806138	6.14871	1.20434	1.22847		3.33667	0.134975	1.18993	0.593805	0.676019
3.34	0.80829	6.15504	1.20369	1.22655		3.34	0.135006	1.19381	0.591557	0.675136
3.34333	0.809824	6.16356	1.20493	1.22446		3.34333	0.134863	1.19684	0.589705	0.674364
3.34667	0.81195	6.17045	1.20234	1.22505		3.34667	0.136075	1.19836	0.590265	0.673632
3.35	0.815188	6.1792	1.203	1.22243		3.35	0.136237	1.20142	0.592555	0.674976
3.35333	0.819933	6.18613	1.20402	1.22374		3.35333	0.138379	1.20636	0.594357	0.67465
3.35667	0.822146	6.19258	1.20384	1.22511		3.35667	0.139035	1.20943	0.594363	0.676521
3.36	0.824468	6.19846	1.20215	1.22682		3.36	0.141058	1.21317	0.592526	0.678335
3.36333	0.826423	6.20734	1.20261	1.22473		3.36333	0.142025	1.21766	0.59089	0.676726
3.36667	0.829114	6.2125	1.20234	1.22749		3.36667	0.142957	1.22194	0.589964	0.675986
3.37	0.830318	6.21993	1.20319	1.22556		3.37	0.143097	1.22408	0.589807	0.676184
3.37333	0.833887	6.22759	1.20295	1.22644		3.37333	0.143996	1.22747	0.591949	0.673524
3.37667	0.837311	6.23413	1.20452	1.22648		3.37667	0.142347	1.22992	0.593137	0.672348
3.38	0.839303	6.24007	1.20628	1.22713		3.38	0.141378	1.23157	0.592556	0.67331
3.38333	0.842325	6.24659	1.20821	1.22793		3.38333	0.142597	1.23495	0.591122	0.674097
3.38667	0.845334	6.25261	1.2044	1.22754		3.38667	0.141602	1.23831	0.589712	0.673229
3.39	0.848095	6.25866	1.20675	1.22692		3.39	0.14264	1.24234	0.588245	0.675424
3.39333	0.850969	6.26534	1.21106	1.22674		3.39333	0.145065	1.24596	0.588668	0.677171
3.39667	0.854363	6.27206	1.20317	1.22527		3.39667	0.146812	1.24994	0.59082	0.676885
3.4	0.856962	6.27843	1.2031	1.22521		3.4	0.146192	1.25273	0.590157	0.676874
3.40333	0.859111	6.28496	1.20621	1.22754		3.40333	0.147276	1.25662	0.588838	0.676123
3.40667	0.859372	6.29088	1.20752	1.22743		3.40667	0.148064	1.26063	0.58831	0.674878
3.41	0.861409	6.29531	1.20425	1.22832		3.41	0.14807	1.26272	0.586095	0.674273
3.41333	0.861764	6.303	1.21351	1.22966		3.41333	0.148162	1.26428	0.584599	0.674174
3.41667	0.864262	6.30866	1.2118	1.22631		3.41667	0.149196	1.26688	0.588071	0.674805
3.42	0.866899	6.31393	1.21205	1.22668		3.42	0.150202	1.26947	0.589094	0.677352
3.42333	0.870118	6.32075	1.21214	1.22601		3.42333	0.150456	1.27001	0.588755	0.676396
3.42667	0.872847	6.32889	1.21192	1.22665		3.42667	0.150707	1.275	0.587853	0.675411
3.43	0.878238	6.33385	1.20929	1.22762		3.43	0.150444	1.27979	0.587866	0.676145
3.43333	0.880897	6.33955	1.21058	1.23097		3.43333	0.15089	1.28241	0.585057	0.67433
3.43667	0.88418	6.34635	1.21075	1.22946		3.43667	0.151494	1.28581	0.585401	0.672444
3.44	0.887587	6.35228	1.20886	1.23009		3.44	0.150421	1.28959	0.58772	0.67417
3.44333	0.889031	6.35787	1.20915	1.22902		3.44333	0.152002	1.29058	0.589563	0.672216
3.44667	0.892104	6.36432	1.20878	1.22861		3.44667	0.153724	1.29267	0.589045	0.672178
3.45	0.894446	6.37065	1.21116	1.22815		3.45	0.154243	1.29539	0.588522	0.672075
3.45333	0.896754	6.37566	1.21116	1.22882		3.45333	0.155694	1.2988	0.587214	0.67111
3.45667	0.897958	6.38212	1.21288	1.22818		3.45667	0.157008	1.30242	0.585857	0.670094
3.46	0.901315	6.38989	1.21211	1.22715		3.46	0.15668	1.3062	0.586552	0.671874
3.46333	0.903006	6.39623	1.21119	1.22782		3.46333	0.156213	1.30895	0.586716	0.670798
3.46667	0.90455	6.40316	1.2108	1.22743		3.46667	0.156062	1.31427	0.588732	0.671306
3.47	0.907456	6.41052	1.21149	1.22786		3.47	0.154816	1.31608	0.587962	0.67176
3.47333	0.910479	6.41493	1.21101	1.22789		3.47333	0.155456	1.31976	0.586907	0.671537
3.47667	0.912294	6.41958	1.21156	1.22924		3.47667	0.156422	1.32331	0.585942	0.669096
3.48	0.915324	6.42736	1.21373	1.23042		3.48	0.156951	1.32664	0.584016	0.670431
3.48333	0.917279	6.43347	1.2109	1.22744		3.48333	0.1588	1.32943	0.582218	0.669513
3.48667	0.920022	6.43835	1.21153	1.2292		3.48667	0.160708	1.33352	0.583976	0.668732
3.49	0.921905	6.44552	1.21205	1.22887		3.49	0.161072	1.33578	0.586684	0.668445
3.49333	0.924238	6.45047	1.21366	1.22865		3.49333	0.159786	1.33926	0.586997	0.669831
3.49667	0.926437	6.45709	1.21224	1.22819		3.49667	0.160931	1.34215	0.587437	0.668062
3.5	0.930697	6.46213	1.2165	1.2316		3.5	0.161427	1.34413	0.586328	0.669042
3.50333	0.93258	6.46763	1.21636	1.22882		3.50333	0.161199	1.34597	0.586357	0.670592
3.50667	0.937129	6.47347	1.21608	1.2299		3.50667	0.163455	1.34927	0.583419	0.671191
3.51	0.941103	6.48049	1.21368	1.2294		3.51	0.16412	1.3515	0.583748	0.672111
3.51333	0.944054	6.48618	1.21231	1.22928		3.51333	0.164802	1.35594	0.584324	0.673635
3.51667	0.946076	6.49223	1.21163	1.22889		3.51667	0.165177	1.35787	0.58464	0.672797
3.52	0.948078	6.49823	1.21074	1.23107		3.52	0.166214	1.36179	0.582511	0.673064
3.52333	0.948864	6.50425	1.21235	1.2298		3.52333	0.165018	1.36621	0.582085	0.670931
3.52667	0.950307	6.50919	1.21518	1.23084		3.52667	0.166915	1.36958	0.580447	0.670599
3.53	0.953066	6.51509	1.21671	1.23155		3.53	0.166236	1.37315	0.58062	0.669101
3.53333	0.956617	6.51958	1.21752	1.23337		3.53333	0.166612	1.37818	0.581384	0.668745
3.53667	0.960181	6.52559	1.21941	1.23163		3.53667	0.167224	1.38182	0.583368	0.667007
3.54	0.963732	6.52942	1.21785	1.23237		3.54	0.169452	1.3849	0.584339	0.67015
3.54333	0.966725	6.53447	1.21675	1.23226		3.54333	0.169261	1.38785	0.584314	0.669818
3.54667	0.969757	6.53995	1.21655	1.23049		3.54667	0.171646	1.39164	0.582573	0.668981
3.55	0.972991	6.54544	1.21486	1.23023		3.55	0.173146	1.39376	0.581317	0.66961
3.55333	0.97466	6.55051	1.21636	1.23093		3.55333	0.172761	1.39658	0.578827	0.668739
3.55667	0.976415	6.55502	1.21732	1.23065		3.55667	0.172026	1.3993	0.578095	0.666326
3.56	0.979008	6.56153	1.21856	1.22996		3.56	0.172174	1.40244	0.580098	0.665883
3.56333	0.980135	6.56731	1.22166	1.23096		3.56333	0.171031	1.40551	0.581718	0.666593
3.56667	0.98356	6.57302	1.22228	1.23012		3.56667	0.170735	1.40894	0.581668	0.666313
3.57	0.986702	6.57743	1.22127	1.23003		3.57	0.171173	1.41264	0.581723	0.66761
3.57333	0.992514	6.58489	1.2217	1.23173		3.57333	0.171147	1.41616	0.580933	0.667434
3.57667	0.994607	6.58901	1.2196	1.23008		3.57667	0.172445	1.41967	0.578615	0.668508
3.58	0.997844	6.59392	1.21931	1.22937		3.58	0.174302	1.42283	0.577925	0.667605
3.58333	0.999815	6.59922	1.22018	1.22832		3.58333	0.174006	1.42659	0.579226	0.667757
3.58667	1.00044	6.60412	1.21988	1.2289		3.58667	0.175088	1.42843	0.5801	0.667788
3.59	1.00041	6.6077	1.21984	1.22777		3.59	0.176581	1.43191	0.581087	0.666819
3.59333	1.00374	6.61274	1.22137	1.22931		3.59333	0.175653	1.43394	0.580998	0.664327
3.59667	1.00642	6.61969	1.22011	1.22858		3.59667	0.176648	1.43679	0.57929	0.664895
3.6	1.00996	6.62578	1.21971	1.22951		3.6	0.177657	1.4396	0.576867	0.663654
3.60333	1.01361	6.63193	1.22068	1.2276		3.60333	0.177415	1.44233	0.578574	0.662308
3.60667	1.01707	6.63807	1.22164	1.22779		3.60667	0.178895	1.44481	0.578	0.66469
3.61	1.02047	6.64403	1.22284	1.22767		3.61	0.180251	1.45053	0.580086	0.666
3.61333	1.02411	6.64888	1.22341	1.23036		3.61333	0.179702	1.45318	0.581546	0.665315
3.61667	1.02526	6.65349	1.22191	1.22899		3.61667	0.178492	1.45621	0.581779	0.665769
3.62	1.02812	6.65706	1.2203	1.23013		3.62	0.181555	1.46157	0.576544	0.664849
3.62333	1.03122	6.6619	1.22337	1.22918		3.62333	0.181424	1.46507	0.575879	0.664122
3.62667	1.03339	6.66473	1.21912	1.23089		3.62667	0.182605	1.46646	0.574018	0.66242
3.63	1.03548	6.66975	1.22211	1.22897		3.63	0.184575	1.46949	0.573519	0.66239
3.63333	1.03793	6.67444	1.22622	1.22926		3.63333	0.187348	1.47311	0.57656	0.661071
3.63667	1.04102	6.68117	1.22521	1.22957		3.63667	0.185644	1.47481	0.58043	0.661722
3.64	1.04224	6.68504	1.22282	1.22969		3.64	0.186239	1.47779	0.580104	0.661321
3.64333	1.0431	6.69185	1.22558	1.22836		3.64333	0.186779	1.48173	0.580068	0.662214
3.64667	1.04465	6.69781	1.22439	1.23006		3.64667	0.186914	1.48706	0.579054	0.662188
3.65	1.04811	6.70157	1.22412	1.23198		3.65	0.18727	1.49041	0.576788	0.662286
3.65333	1.05094	6.70546	1.22437	1.23051		3.65333	0.189217	1.49612	0.576754	0.660975
3.65667	1.05391	6.71208	1.22565	1.23191		3.65667	0.188275	1.49926	0.576376	0.660105
3.66	1.05746	6.71477	1.22552	1.23193		3.66	0.188945	1.50227	0.576885	0.659965
3.66333	1.06154	6.71904	1.22641	1.23273		3.66333	0.188851	1.50546	0.575691	0.660459
3.66667	1.06513	6.72577	1.22289	1.23156		3.66667	0.189529	1.50731	0.573931	0.660537
3.67	1.06749	6.73011	1.22494	1.23341		3.67	0.188303	1.51081	0.571713	0.662267
3.67333	1.0707	6.73363	1.21909	1.23337		3.67333	0.18936	1.51615	0.57174	0.661744
3.67667	1.07289	6.73942	1.22125	1.23226		3.67667	0.189482	1.51786	0.57105	0.662694
3.68	1.07453	6.74439	1.22378	1.23076		3.68	0.190232	1.52076	0.573207	0.661995
3.68333	1.07785	6.74817	1.22261	1.23099		3.68333	0.190529	1.52549	0.575979	0.662142
3.68667	1.07999	6.75291	1.22391	1.22905		3.68667	0.192751	1.5279	0.576732	0.661279
3.69	1.08201	6.75842	1.23063	1.22806		3.69	0.193426	1.53175	0.577884	0.66095
3.69333	1.08546	6.76311	1.22909	1.22914		3.69333	0.194172	1.53655	0.57592	0.660223
3.69667	1.08717	6.76828	1.22834	1.22851		3.69667	0.194931	1.53953	0.573722	0.658602
3.7	1.08855	6.77244	1.23115	1.22769		3.7	0.194915	1.54258	0.571615	0.657865
3.70333	1.09078	6.77733	1.23042	1.23063		3.70333	0.195429	1.54552	0.57205	0.658178
3.70667	1.0938	6.78144	1.22591	1.23192		3.70667	0.197176	1.54782	0.570826	0.656918
3.71	1.0964	6.78659	1.22591	1.23297		3.71	0.197902	1.55149	0.573654	0.656659
3.71333	1.10135	6.79024	1.22454	1.23284		3.71333	0.19775	1.55442	0.575175	0.658352
3.71667	1.10607	6.79447	1.22281	1.23198		3.71667	0.199043	1.55866	0.573481	0.658474
3.72	1.1103	6.79925	1.22511	1.23062		3.72	0.198701	1.56197	0.57299	0.656428
3.72333	1.1141	6.8035	1.22563	1.22953		3.72333	0.198552	1.56485	0.57234	0.658041
3.72667	1.11771	6.80794	1.22622	1.2271		3.72667	0.199219	1.56726	0.570427	0.656643
3.73	1.12066	6.81418	1.22209	1.22584		3.73	0.201117	1.57092	0.57122	0.65628
3.73333	1.12291	6.81871	1.22437	1.22778		3.73333	0.201108	1.5726	0.573363	0.655854
3.73667	1.12607	6.8219	1.22223	1.22851		3.73667	0.202155	1.57674	0.573624	0.656208
3.74	1.12848	6.82648	1.22557	1.22736		3.74	0.202033	1.57804	0.57397	0.656549
3.74333	1.13058	6.82984	1.22724	1.22811		3.74333	0.20203	1.58199	0.573497	0.655733
3.74667	1.13158	6.83352	1.23003	1.22937		3.74667	0.200951	1.58486	0.572045	0.655652
3.75	1.13511	6.83709	1.23026	1.22843		3.75	0.203124	1.58909	0.572752	0.657113
3.75333	1.13627	6.84256	1.23099	1.22804		3.75333	0.202866	1.59032	0.573419	0.657152
3.75667	1.1387	6.84662	1.23156	1.22833		3.75667	0.204779	1.59557	0.573082	0.655564
3.76	1.14065	6.85084	1.22563	1.22962		3.76	0.206202	1.59802	0.573618	0.657478
3.76333	1.14478	6.8557	1.22824	1.23008		3.76333	0.207212	1.60205	0.573313	0.657143
3.76667	1.14599	6.86159	1.22923	1.23066		3.76667	0.206623	1.60501	0.570857	0.656975
3.77	1.1512	6.86566	1.22475	1.23065		3.77	0.208822	1.60901	0.568701	0.657245
3.77333	1.15399	6.86903	1.22525	1.23111		3.77333	0.208139	1.61178	0.568147	0.657336
3.77667	1.15851	6.87446	1.23113	1.23147		3.77667	0.207675	1.61621	0.568243	0.656822
3.78	1.16208	6.87806	1.22964	1.23184		3.78	0.2089	1.61825	0.568915	0.656931
3.78333	1.16569	6.88227	1.22779	1.23181		3.78333	0.20909	1.62107	0.571073	0.655161
3.78667	1.16696	6.88471	1.23289	1.23229		3.78667	0.208869	1.62448	0.571322	0.65413
3.79	1.1684	6.89025	1.22942	1.23216		3.79	0.209661	1.62984	0.571669	0.65394
3.79333	1.16966	6.89401	1.2271	1.23281		3.79333	0.210952	1.63453	0.570648	0.652658
3.79667	1.1705	6.8975	1.2265	1.23223		3.79667	0.211401	1.64052	0.569397	0.650734
3.8	1.17289	6.90108	1.22688	1.23115		3.8	0.211498	1.64545	0.56718	0.652209
3.80333	1.17637	6.90693	1.22839	1.23025		3.80333	0.211175	1.64928	0.56786	0.652487
3.80667	1.18048	6.90873	1.22878	1.23078		3.80667	0.212494	1.65125	0.56736	0.652272
3.81	1.18363	6.91274	1.23316	1.23074		3.81	0.212315	1.65492	0.569518	0.653548
3.81333	1.18704	6.9179	1.23129	1.22997		3.81333	0.212572	1.65645	0.570055	0.653697
3.81667	1.19192	6.92293	1.2346	1.23175		3.81667	0.214473	1.65933	0.570412	0.653385
3.82	1.19348	6.92564	1.2275	1.23284		3.82	0.214944	1.66397	0.568027	0.652997
3.82333	1.19634	6.93186	1.22909	1.23356		3.82333	0.214706	1.66721	0.567387	0.653571
3.82667	1.20023	6.93515	1.22574	1.23306		3.82667	0.216727	1.66925	0.564612	0.653057
3.83	1.20231	6.94009	1.22754	1.23433		3.83	0.216955	1.67321	0.565144	0.653823
3.83333	1.20335	6.94527	1.22641	1.23323		3.83333	0.2163	1.67771	0.566035	0.652509
3.83667	1.20591	6.949	1.23003	1.23312		3.83667	0.218237	1.67999	0.566725	0.652825
3.84	1.20639	6.95177	1.22982	1.23263		3.84	0.218035	1.68366	0.567596	0.652641
3.84333	1.20901	6.95628	1.23124	1.23123		3.84333	0.218526	1.68748	0.568163	0.652074
3.84667	1.21298	6.95787	1.23109	1.23113		3.84667	0.220175	1.68889	0.565577	0.651063
3.85	1.21701	6.95988	1.22883	1.23244		3.85	0.22011	1.691	0.56457	0.651403
3.85333	1.22158	6.96512	1.22978	1.23244		3.85333	0.220628	1.69419	0.563165	0.651612
3.85667	1.22584	6.96774	1.2295	1.23299		3.85667	0.222044	1.69845	0.563411	0.651319
3.86	1.22748	6.97126	1.23086	1.23343		3.86	0.221537	1.70163	0.56461	0.651117
3.86333	1.22979	6.97588	1.23324	1.23108		3.86333	0.221768	1.70565	0.568253	0.650977
3.86667	1.23355	6.98194	1.23291	1.23124		3.86667	0.223835	1.70938	0.568215	0.650587
3.87	1.23599	6.98384	1.23284	1.23016		3.87	0.222737	1.71276	0.569171	0.651104
3.87333	1.23925	6.9884	1.22996	1.22925		3.87333	0.224231	1.71468	0.567439	0.649888
3.87667	1.24303	6.99243	1.23107	1.23036		3.87667	0.225339	1.71685	0.564368	0.649292
3.88	1.24573	6.99581	1.23198	1.23117		3.88	0.224297	1.72273	0.561388	0.649281
3.88333	1.24783	6.9991	1.22724	1.22966		3.88333	0.224544	1.72656	0.563001	0.648426
3.88667	1.25046	7.00469	1.22827	1.2298		3.88667	0.226353	1.73003	0.563989	0.648715
3.89	1.25257	7.00868	1.23198	1.23036		3.89	0.225992	1.73511	0.56641	0.649507
3.89333	1.25435	7.01118	1.22967	1.22952		3.89333	0.22613	1.73947	0.568394	0.649792
3.89667	1.25625	7.01431	1.22928	1.23255		3.89667	0.228014	1.74054	0.568284	0.650498
3.9	1.26024	7.0183	1.23646	1.23332		3.9	0.229192	1.74518	0.563236	0.650136
3.90333	1.26252	7.02074	1.23468	1.23158		3.90333	0.229989	1.74829	0.562551	0.648232
3.90667	1.26523	7.02385	1.23425	1.22979		3.90667	0.231187	1.75127	0.560039	0.647937
3.91	1.26877	7.02745	1.23379	1.23071		3.91	0.231872	1.75429	0.560199	0.648716
3.91333	1.27122	7.03054	1.23158	1.22943		3.91333	0.232718	1.75994	0.561954	0.646045
3.91667	1.27356	7.03309	1.23168	1.22966		3.91667	0.233149	1.76145	0.564918	0.64696
3.92	1.27624	7.03787	1.2325	1.23252		3.92	0.233802	1.76498	0.564507	0.647332
3.92333	1.28011	7.0423	1.2317	1.23314		3.92333	0.233822	1.76931	0.564341	0.647017
3.92667	1.28417	7.04705	1.23097	1.23217		3.92667	0.234767	1.77352	0.561343	0.646208
3.93	1.28828	7.05238	1.22929	1.23019		3.93	0.235379	1.77524	0.558476	0.64904
3.93333	1.29148	7.05653	1.22696	1.22971		3.93333	0.235917	1.77941	0.557563	0.647578
3.93667	1.29465	7.05896	1.22837	1.22965		3.93667	0.237998	1.78384	0.558162	0.648282
3.94	1.29541	7.06266	1.22848	1.23051		3.94	0.239559	1.78616	0.560164	0.647598
3.94333	1.29579	7.0664	1.2313	1.23011		3.94333	0.23971	1.78812	0.561996	0.64722
3.94667	1.30013	7.06839	1.2331	1.23389		3.94667	0.239768	1.79307	0.564879	0.645637
3.95	1.30253	7.07344	1.23566	1.23451		3.95	0.240701	1.79655	0.563952	0.645305
3.95333	1.30549	7.07616	1.23275	1.23405		3.95333	0.238841	1.80088	0.563069	0.643886
3.95667	1.31008	7.07905	1.23525	1.23433		3.95667	0.238825	1.80343	0.561978	0.644169
3.96	1.31279	7.08125	1.23291	1.23518		3.96	0.239771	1.8098	0.559351	0.644722
3.96333	1.31532	7.08425	1.23341	1.23244		3.96333	0.240494	1.81175	0.557307	0.64469
3.96667	1.31879	7.08661	1.23141	1.23285		3.96667	0.240756	1.81497	0.559696	0.645954
3.97	1.32222	7.09109	1.23481	1.23342		3.97	0.241362	1.81715	0.560485	0.646123
3.97333	1.3256	7.09471	1.23454	1.23393		3.97333	0.242994	1.82046	0.558655	0.645892
3.97667	1.32874	7.09737	1.23725	1.23188		3.97667	0.242907	1.82225	0.559017	0.645345
3.98	1.32848	7.10187	1.2363	1.23461		3.98	0.244966	1.82707	0.558079	0.644871
3.98333	1.33092	7.10652	1.23886	1.23319		3.98333	0.245491	1.83114	0.557002	0.644958
3.98667	1.33318	7.10868	1.23734	1.23304		3.98667	0.247884	1.83355	0.555854	0.645169
3.99	1.33526	7.11218	1.2405	1.23246		3.99	0.248757	1.83845	0.558244	0.644425
3.99333	1.33781	7.1156	1.23829	1.23517		3.99333	0.249063	1.84182	0.560291	0.644138
3.99667	1.34305	7.11872	1.23618	1.23378		3.99667	0.249308	1.84355	0.561055	0.644832
4	1.34695	7.11955	1.23647	1.23642		4	0.249774	1.84621	0.55986	0.644285
4.00333	1.34944	7.12197	1.23552	1.23605		4.00333	0.249461	1.85125	0.558668	0.643332
4.00667	1.35186	7.12459	1.23252	1.23675		4.00667	0.249707	1.85563	0.555139	0.644643
4.01	1.35499	7.12795	1.23245	1.23386		4.01	0.251296	1.86112	0.554206	0.644748
4.01333	1.35765	7.13104	1.23566	1.23421		4.01333	0.251345	1.86548	0.55418	0.643057
4.01667	1.35998	7.13611	1.23481	1.23041		4.01667	0.253031	1.86923	0.555772	0.64238
4.02	1.36305	7.14065	1.2338	1.23332		4.02	0.25471	1.87137	0.55813	0.642369
4.02333	1.36602	7.14317	1.23355	1.23258		4.02333	0.253492	1.87309	0.560526	0.64145
4.02667	1.36882	7.14729	1.23443	1.23577		4.02667	0.254399	1.87602	0.55993	0.64112
4.03	1.37217	7.15078	1.23367	1.2349		4.03	0.254952	1.87944	0.559193	0.643351
4.03333	1.37556	7.1541	1.23184	1.23684		4.03333	0.255043	1.88289	0.556364	0.641657
4.03667	1.37846	7.15759	1.23572	1.23233		4.03667	0.255252	1.88784	0.554964	0.641848
4.04	1.38193	7.16127	1.23481	1.23293		4.04	0.25674	1.89271	0.554254	0.640772
4.04333	1.38446	7.16379	1.23462	1.23189		4.04333	0.257315	1.89354	0.555993	0.641671
4.04667	1.3855	7.16547	1.23405	1.23349		4.04667	0.258239	1.8963	0.556298	0.63894
4.05	1.38885	7.16942	1.2316	1.23167		4.05	0.258697	1.90086	0.557972	0.640096
4.05333	1.39181	7.17189	1.2299	1.23505		4.05333	0.258031	1.90429	0.556259	0.640254
4.05667	1.39266	7.1751	1.22795	1.23524		4.05667	0.258672	1.90757	0.555615	0.640618
4.06	1.39559	7.1773	1.23261	1.23548		4.06	0.257397	1.91195	0.553394	0.639209
4.06333	1.39933	7.1812	1.23646	1.23304		4.06333	0.259203	1.91615	0.553649	0.639802
4.06667	1.40306	7.18303	1.23646	1.23485		4.06667	0.259731	1.91824	0.554861	0.639956
4.07	1.4054	7.18708	1.24031	1.23143		4.07	0.261402	1.92044	0.557412	0.639976
4.07333	1.41019	7.1897	1.24377	1.23094		4.07333	0.263063	1.92375	0.558271	0.641446
4.07667	1.41361	7.19396	1.24139	1.23012		4.07667	0.265427	1.92824	0.55918	0.641512
4.08	1.41684	7.19622	1.23705	1.23166		4.08	0.266263	1.93233	0.558178	0.641047
4.08333	1.41835	7.20043	1.24028	1.23267		4.08333	0.268417	1.93758	0.554782	0.639901
4.08667	1.42127	7.20342	1.23636	1.23487		4.08667	0.268407	1.9418	0.551779	0.637681
4.09	1.42259	7.20623	1.23513	1.23458		4.09	0.268047	1.94386	0.55129	0.637065
4.09333	1.42577	7.2084	1.23235	1.2353		4.09333	0.267927	1.94794	0.552351	0.637165
4.09667	1.42791	7.21221	1.23231	1.23325		4.09667	0.266886	1.95005	0.552517	0.63749
4.1	1.43279	7.21478	1.23393	1.23197		4.1	0.265545	1.95221	0.553771	0.637947
4.10333	1.43525	7.21653	1.23731	1.23194		4.10333	0.26712	1.95634	0.554975	0.638403
4.10667	1.43938	7.21892	1.23659	1.23386		4.10667	0.268454	1.96104	0.553734	0.637722
4.11	1.44249	7.22283	1.23963	1.23308		4.11	0.270673	1.96312	0.551309	0.637077
4.11333	1.44655	7.22509	1.24016	1.23268		4.11333	0.273009	1.96633	0.550065	0.636987
4.11667	1.44951	7.22921	1.23913	1.23193		4.11667	0.274042	1.97028	0.549196	0.637241
4.12	1.45184	7.2312	1.23476	1.23121		4.12	0.275253	1.9725	0.551361	0.636853
4.12333	1.45579	7.23447	1.23424	1.22938		4.12333	0.274953	1.97501	0.553395	0.637148
4.12667	1.45898	7.23598	1.23344	1.23132		4.12667	0.274652	1.97808	0.554108	0.637463
4.13	1.46212	7.23981	1.23486	1.23244		4.13	0.274008	1.98218	0.55452	0.636806
4.13333	1.46406	7.24236	1.23596	1.23311		4.13333	0.27544	1.98581	0.553486	0.636253
4.13667	1.46846	7.24576	1.2342	1.23163		4.13667	0.275819	1.98964	0.550471	0.636133
4.14	1.47026	7.2474	1.23661	1.23402		4.14	0.277305	1.99318	0.54797	0.634443
4.14333	1.47291	7.24957	1.24013	1.23228		4.14333	0.278442	1.99748	0.546746	0.635066
4.14667	1.47555	7.25173	1.23482	1.23287		4.14667	0.277851	2.00044	0.54886	0.634211
4.15	1.47968	7.25561	1.2333	1.23253		4.15	0.277504	2.00295	0.550244	0.634716
4.15333	1.48334	7.25846	1.2379	1.23096		4.15333	0.276456	2.00722	0.552289	0.635172
4.15667	1.48624	7.26032	1.23671	1.22882		4.15667	0.27772	2.01154	0.552876	0.635638
4.16	1.48824	7.2632	1.2329	1.22848		4.16	0.278255	2.01584	0.553801	0.634188
4.16333	1.48908	7.26517	1.2381	1.22898		4.16333	0.280049	2.01996	0.54996	0.635813
4.16667	1.49118	7.26661	1.23889	1.22985		4.16667	0.280861	2.02264	0.548819	0.635102
4.17	1.49495	7.2708	1.23993	1.23221		4.17	0.282284	2.02576	0.546615	0.632559
4.17333	1.49741	7.27554	1.24114	1.22973		4.17333	0.282266	2.0297	0.549444	0.633667
4.17667	1.50172	7.27845	1.24114	1.23056		4.17667	0.282104	2.03271	0.550435	0.632179
4.18	1.50571	7.28103	1.24206	1.22967		4.18	0.283709	2.03601	0.553488	0.632744
4.18333	1.50736	7.28353	1.24133	1.2296		4.18333	0.282945	2.04023	0.553799	0.631924
4.18667	1.50878	7.28467	1.23898	1.23008		4.18667	0.284652	2.04336	0.552146	0.635286
4.19	1.51151	7.28705	1.23907	1.23288		4.19	0.285505	2.04487	0.547401	0.634815
4.19333	1.51314	7.29035	1.23756	1.22977		4.19333	0.286671	2.04765	0.544436	0.634368
4.19667	1.5158	7.29332	1.23624	1.22987		4.19667	0.285885	2.05045	0.542279	0.633228
4.2	1.52001	7.29637	1.23605	1.23014		4.2	0.288333	2.0551	0.543253	0.633465
4.20333	1.52336	7.29963	1.23955	1.22934		4.20333	0.28731	2.06028	0.545956	0.631326
4.20667	1.52495	7.30165	1.23608	1.23		4.20667	0.28777	2.06466	0.54898	0.630281
4.21	1.52903	7.30416	1.24037	1.23185		4.21	0.287922	2.06852	0.54996	0.631204
4.21333	1.53383	7.30641	1.24135	1.23233		4.21333	0.288501	2.07137	0.548398	0.630187
4.21667	1.53771	7.31068	1.23993	1.23024		4.21667	0.288707	2.07531	0.546639	0.630853
4.22	1.54083	7.31216	1.23478	1.23126		4.22	0.289734	2.07771	0.544117	0.63096
4.22333	1.54627	7.31692	1.24274	1.22922		4.22333	0.289957	2.08186	0.541248	0.63134
4.22667	1.54892	7.31914	1.24077	1.23114		4.22667	0.291414	2.08554	0.541494	0.631801
4.23	1.55087	7.32254	1.23661	1.2303		4.23	0.292114	2.0922	0.543583	0.632542
4.23333	1.5527	7.32276	1.24114	1.23115		4.23333	0.292658	2.09419	0.544489	0.630917
4.23667	1.55591	7.32519	1.24447	1.22903		4.23667	0.293419	2.09922	0.545357	0.631365
4.24	1.55918	7.32684	1.2381	1.23019		4.24	0.293881	2.10313	0.545382	0.630582
4.24333	1.56216	7.3293	1.23768	1.22883		4.24333	0.295154	2.10642	0.544296	0.629304
4.24667	1.56491	7.33131	1.24114	1.23044		4.24667	0.29547	2.10804	0.542558	0.630751
4.25	1.56814	7.33595	1.2406	1.23148		4.25	0.297261	2.11301	0.541502	0.631242
4.25333	1.57031	7.33874	1.23826	1.23391		4.25333	0.29888	2.11493	0.541677	0.630853
4.25667	1.57288	7.34053	1.24107	1.23308		4.25667	0.299152	2.11923	0.543812	0.630806
4.26	1.57561	7.34208	1.24059	1.23115		4.26	0.298921	2.12259	0.545946	0.63102
4.26333	1.57789	7.34382	1.24086	1.22891		4.26333	0.3016	2.12759	0.547383	0.629947
4.26667	1.58245	7.34626	1.23987	1.22891		4.26667	0.299913	2.1312	0.546608	0.630173
4.27	1.58571	7.35039	1.24035	1.22779		4.27	0.299474	2.13466	0.546523	0.630536
4.27333	1.58914	7.35301	1.24087	1.22779		4.27333	0.302391	2.13634	0.543994	0.630707
4.27667	1.59276	7.35632	1.23977	1.22966		4.27667	0.30446	2.14011	0.541336	0.630402
4.28	1.59592	7.35954	1.24034	1.23052		4.28	0.303443	2.1421	0.540057	0.629232
4.28333	1.59746	7.36272	1.2382	1.22968		4.28333	0.306951	2.14445	0.541453	0.629054
4.28667	1.60182	7.36396	1.24081	1.23105		4.28667	0.308164	2.14747	0.542491	0.629674
4.29	1.60424	7.36655	1.23756	1.23223		4.29	0.307418	2.15045	0.544107	0.628649
4.29333	1.60592	7.36886	1.24167	1.23206		4.29333	0.306437	2.15496	0.544154	0.628983
4.29667	1.60972	7.37099	1.23954	1.23175		4.29667	0.307809	2.15868	0.5426	0.628843
4.3	1.6128	7.37167	1.23695	1.23091		4.3	0.306286	2.16391	0.540219	0.628612
4.30333	1.6155	7.37354	1.23671	1.22821		4.30333	0.306769	2.16822	0.537594	0.627796
4.30667	1.61693	7.37664	1.2409	1.22904		4.30667	0.306605	2.17316	0.537966	0.628185
4.31	1.62188	7.38092	1.23917	1.22938		4.31	0.307976	2.17534	0.539549	0.628409
4.31333	1.62333	7.38373	1.23914	1.23233		4.31333	0.308106	2.17857	0.543984	0.627441
4.31667	1.62632	7.38735	1.24598	1.23179		4.31667	0.310089	2.17963	0.54633	0.62704
4.32	1.62802	7.39063	1.24291	1.2335		4.32	0.312016	2.18136	0.546945	0.627553
4.32333	1.63285	7.39164	1.24258	1.23264		4.32333	0.31297	2.18424	0.543906	0.627158
4.32667	1.6345	7.39227	1.23915	1.23412		4.32667	0.314817	2.18747	0.541455	0.625967
4.33	1.63873	7.39378	1.24141	1.23212		4.33	0.315833	2.19123	0.539032	0.626833
4.33333	1.64244	7.39658	1.2372	1.23404		4.33333	0.316804	2.19386	0.538628	0.626371
4.33667	1.64631	7.39905	1.24054	1.23178		4.33667	0.317094	2.19924	0.540501	0.625745
4.34	1.64871	7.40189	1.23772	1.23245		4.34	0.318612	2.20287	0.54321	0.625673
4.34333	1.6513	7.40317	1.23891	1.23045		4.34333	0.318963	2.2062	0.544923	0.62609
4.34667	1.65302	7.40643	1.2376	1.23025		4.34667	0.320673	2.21059	0.544401	0.625611
4.35	1.65536	7.40677	1.2412	1.22939		4.35	0.320347	2.21541	0.542092	0.62586
4.35333	1.65843	7.40744	1.24035	1.23126		4.35333	0.321867	2.21787	0.540857	0.625422
4.35667	1.6606	7.40832	1.24135	1.2277		4.35667	0.323223	2.22074	0.538357	0.624775
4.36	1.66344	7.41089	1.24486	1.2292		4.36	0.323431	2.22423	0.537118	0.624015
4.36333	1.66672	7.41212	1.24355	1.22886		4.36333	0.323945	2.22652	0.538372	0.624789
4.36667	1.67009	7.41588	1.244	1.23051		4.36667	0.325054	2.23062	0.540467	0.62491
4.37	1.67388	7.41794	1.24108	1.22978		4.37	0.324438	2.23353	0.54081	0.623429
4.37333	1.67756	7.42119	1.24719	1.23391		4.37333	0.324445	2.23899	0.540942	0.62524
4.37667	1.68124	7.42305	1.24089	1.23341		4.37667	0.324527	2.24433	0.540611	0.625782
4.38	1.68484	7.42612	1.24821	1.23355		4.38	0.325951	2.24744	0.53728	0.625117
4.38333	1.6866	7.42816	1.25016	1.23182		4.38333	0.327583	2.25282	0.537024	0.624817
4.38667	1.68859	7.4312	1.25164	1.2342		4.38667	0.329133	2.25784	0.534154	0.626194
4.39	1.69084	7.43313	1.24601	1.23137		4.39	0.32979	2.26062	0.535087	0.623125
4.39333	1.69545	7.4359	1.25066	1.23114		4.39333	0.330768	2.26441	0.535869	0.624347
4.39667	1.69791	7.43797	1.24852	1.23222		4.39667	0.330039	2.26911	0.537183	0.623612
4.4	1.7017	7.4408	1.24575	1.23171		4.4	0.330089	2.27034	0.536625	0.623057
4.40333	1.7056	7.44415	1.24771	1.23069		4.40333	0.330153	2.2717	0.537061	0.621761
4.40667	1.70849	7.44676	1.25083	1.23294		4.40667	0.332455	2.27307	0.535093	0.622445
4.41	1.70876	7.45012	1.25019	1.23303		4.41	0.333464	2.27408	0.533539	0.621206
4.41333	1.71147	7.45089	1.24922	1.23221		4.41333	0.335216	2.27781	0.532843	0.620512
4.41667	1.71412	7.45419	1.24941	1.23152		4.41667	0.33582	2.28405	0.531261	0.620462
4.42	1.71681	7.45541	1.24781	1.23371		4.42	0.337121	2.28809	0.533411	0.619569
4.42333	1.71964	7.45625	1.24726	1.23238		4.42333	0.336315	2.29375	0.535293	0.619825
4.42667	1.72353	7.45683	1.24617	1.23288		4.42667	0.336951	2.29915	0.536666	0.619273
4.43	1.72601	7.45853	1.2423	1.23257		4.43	0.336761	2.30308	0.535737	0.620482
4.43333	1.72894	7.45866	1.23855	1.23395		4.43333	0.337551	2.30366	0.535729	0.62007
4.43667	1.73255	7.46026	1.24049	1.23253		4.43667	0.33791	2.30869	0.533493	0.619641
4.44	1.73575	7.46334	1.23863	1.23472		4.44	0.338311	2.31135	0.532018	0.619625
4.44333	1.73878	7.46471	1.24222	1.23539		4.44333	0.338554	2.31452	0.53131	0.618826
4.44667	1.74368	7.46806	1.2443	1.23536		4.44667	0.338947	2.31722	0.533329	0.617331
4.45	1.74738	7.46967	1.24992	1.23629		4.45	0.338743	2.32256	0.534492	0.618557
4.45333	1.75007	7.47359	1.24761	1.23361		4.45333	0.339327	2.32598	0.534615	0.619349
4.45667	1.75342	7.4755	1.24996	1.2316		4.45667	0.339653	2.32933	0.534657	0.617862
4.46	1.75595	7.47764	1.2438	1.22953		4.46	0.339476	2.33246	0.533181	0.617767
4.46333	1.75708	7.47927	1.24534	1.22993		4.46333	0.340065	2.33553	0.53111	0.617838
4.46667	1.75951	7.48269	1.24363	1.22874		4.46667	0.34068	2.33755	0.530578	0.616564
4.47	1.7636	7.48215	1.24299	1.23163		4.47	0.340257	2.34234	0.530846	0.618064
4.47333	1.76495	7.48433	1.24046	1.23198		4.47333	0.341091	2.34597	0.531619	0.619275
4.47667	1.76837	7.48648	1.24206	1.23224		4.47667	0.343406	2.34896	0.533717	0.618232
4.48	1.772	7.48809	1.24174	1.23262		4.48	0.344501	2.35508	0.53482	0.618957
4.48333	1.77484	7.49235	1.23931	1.23452		4.48333	0.345547	2.35915	0.534176	0.619019
4.48667	1.77729	7.49528	1.24169	1.23445		4.48667	0.346857	2.36182	0.53418	0.61664
4.49	1.77979	7.49692	1.23939	1.2327		4.49	0.347322	2.36597	0.531612	0.618078
4.49333	1.78232	7.49902	1.24002	1.23288		4.49333	0.346974	2.37019	0.530196	0.619068
4.49667	1.7846	7.5001	1.23766	1.2338		4.49667	0.347466	2.37149	0.529971	0.618477
4.5	1.78807	7.4988	1.23971	1.23084		4.5	0.347264	2.37558	0.530713	0.61763
4.50333	1.7923	7.50146	1.24144	1.22944		4.50333	0.34882	2.37938	0.532477	0.617171
4.50667	1.79795	7.50425	1.2386	1.23012		4.50667	0.350966	2.38202	0.535912	0.615353
4.51	1.80143	7.50806	1.24179	1.2316		4.51	0.351779	2.38669	0.536044	0.613581
4.51333	1.80559	7.51132	1.24648	1.23016		4.51333	0.353086	2.39157	0.534408	0.614172
4.51667	1.80892	7.51498	1.24317	1.23117		4.51667	0.354636	2.39463	0.53229	0.613979
4.52	1.81089	7.51567	1.24119	1.23219		4.52	0.354336	2.39711	0.527614	0.616133
4.52333	1.81444	7.51542	1.24639	1.23306		4.52333	0.35388	2.40217	0.524948	0.615241
4.52667	1.81653	7.51679	1.246	1.22963		4.52667	0.355069	2.40447	0.523915	0.615127
4.53	1.81892	7.51831	1.2429	1.22905		4.53	0.35517	2.40818	0.527713	0.614444
4.53333	1.82215	7.51901	1.2473	1.22939		4.53333	0.356383	2.41147	0.530616	0.615115
4.53667	1.82528	7.5224	1.24707	1.22868		4.53667	0.357689	2.41353	0.532542	0.614413
4.54	1.82609	7.52459	1.24925	1.22915		4.54	0.358144	2.41667	0.533584	0.613889
4.54333	1.82869	7.5263	1.24622	1.23139		4.54333	0.358078	2.41995	0.533088	0.61429
4.54667	1.83126	7.52881	1.24605	1.2316		4.54667	0.358731	2.42197	0.52906	0.614915
4.55	1.83494	7.53329	1.24398	1.23248		4.55	0.360631	2.42636	0.527161	0.614358
4.55333	1.83908	7.53428	1.24253	1.23037		4.55333	0.361771	2.43173	0.526746	0.614583
4.55667	1.84329	7.53816	1.24037	1.23015		4.55667	0.363331	2.43322	0.526902	0.61557
4.56	1.84631	7.53977	1.24052	1.22942		4.56	0.366004	2.43767	0.529683	0.615945
4.56333	1.84956	7.54268	1.24139	1.23095		4.56333	0.366831	2.44137	0.53149	0.613436
4.56667	1.85142	7.54216	1.24316	1.22804		4.56667	0.3653	2.4432	0.532973	0.613882
4.57	1.8551	7.54396	1.24385	1.23115		4.57	0.365727	2.44637	0.531569	0.61307
4.57333	1.85852	7.54607	1.24408	1.23058		4.57333	0.36615	2.45164	0.531415	0.612329
4.57667	1.8619	7.54746	1.24344	1.2313		4.57667	0.365226	2.45407	0.528127	0.611909
4.58	1.86521	7.54866	1.24375	1.23128		4.58	0.36676	2.4581	0.525114	0.613079
4.58333	1.86727	7.55165	1.24449	1.2337		4.58333	0.369517	2.46073	0.524088	0.612866
4.58667	1.86975	7.55357	1.24488	1.23135		4.58667	0.369541	2.46551	0.526261	0.612209
4.59	1.87181	7.55457	1.24637	1.23081		4.59	0.369423	2.46858	0.526204	0.612454
4.59333	1.87636	7.55815	1.24787	1.23072		4.59333	0.371553	2.47276	0.52861	0.61335
4.59667	1.8789	7.55959	1.25004	1.22919		4.59667	0.370783	2.47626	0.53186	0.613295
4.6	1.88215	7.56199	1.24795	1.2283		4.6	0.369975	2.48108	0.530723	0.612511
4.60333	1.88474	7.56473	1.24774	1.23012		4.60333	0.371786	2.48318	0.530093	0.611695
4.60667	1.88749	7.56492	1.25019	1.23216		4.60667	0.37331	2.48598	0.527978	0.612689
4.61	1.8896	7.56498	1.2487	1.22901		4.61	0.373357	2.4897	0.525994	0.611508
4.61333	1.89346	7.56769	1.24249	1.22878		4.61333	0.375497	2.49356	0.523339	0.610946
4.61667	1.89702	7.56826	1.2463	1.23068		4.61667	0.376407	2.49747	0.523041	0.611368
4.62	1.89969	7.56917	1.24466	1.2294		4.62	0.376903	2.50125	0.523253	0.612514
4.62333	1.90314	7.57264	1.2408	1.22904		4.62333	0.377129	2.50597	0.526833	0.612144
4.62667	1.90588	7.57515	1.24151	1.23277		4.62667	0.377713	2.50887	0.526599	0.611495
4.63	1.90727	7.57693	1.24762	1.23272		4.63	0.376927	2.51187	0.527582	0.613223
4.63333	1.90996	7.57871	1.24348	1.23154		4.63333	0.378219	2.51458	0.529432	0.612912
4.63667	1.91368	7.58149	1.24877	1.23089		4.63667	0.378964	2.51765	0.527495	0.612172
4.64	1.91691	7.5834	1.24725	1.23206		4.64	0.380759	2.52117	0.523424	0.610776
4.64333	1.91944	7.58579	1.24923	1.23264		4.64333	0.381796	2.52519	0.523235	0.61099
4.64667	1.92427	7.58648	1.24461	1.22976		4.64667	0.384443	2.5292	0.522633	0.609124
4.65	1.92679	7.58915	1.24546	1.23032		4.65	0.383963	2.53378	0.52069	0.609173
4.65333	1.93052	7.59222	1.24199	1.23011		4.65333	0.383961	2.53702	0.523298	0.609605
4.65667	1.93227	7.59302	1.24386	1.2271		4.65667	0.383479	2.53854	0.525714	0.608404
4.66	1.93487	7.59607	1.24431	1.22593		4.66	0.383697	2.54207	0.527209	0.608828
4.66333	1.93676	7.59934	1.24745	1.22987		4.66333	0.385001	2.54473	0.527931	0.608453
4.66667	1.93849	7.60108	1.24805	1.23012		4.66667	0.386101	2.54729	0.52847	0.608077
4.67	1.94045	7.60124	1.2516	1.23015		4.67	0.387383	2.55138	0.526003	0.606608
4.67333	1.9435	7.60295	1.25055	1.22965		4.67333	0.389104	2.55662	0.523637	0.607901
4.67667	1.94604	7.60201	1.24655	1.23149		4.67667	0.389629	2.56003	0.522221	0.608145
4.68	1.9481	7.60395	1.2468	1.22884		4.68	0.389814	2.56344	0.521156	0.608422
4.68333	1.95214	7.60571	1.24968	1.22824		4.68333	0.390958	2.56698	0.520131	0.608051
4.68667	1.95598	7.60813	1.24566	1.22855		4.68667	0.39065	2.56871	0.521054	0.60739
4.69	1.95924	7.61142	1.24514	1.22911		4.69	0.3922	2.57164	0.521627	0.608069
4.69333	1.96276	7.61541	1.24761	1.22579		4.69333	0.393655	2.57415	0.521832	0.607444
4.69667	1.9674	7.61594	1.24533	1.22642		4.69667	0.393309	2.57922	0.52312	0.606998
4.7	1.96993	7.61738	1.24264	1.2267		4.7	0.393389	2.58384	0.523511	0.606361
4.70333	1.97334	7.61967	1.24352	1.22649		4.70333	0.394703	2.58897	0.52132	0.607382
4.70667	1.97713	7.6219	1.2452	1.22701		4.70667	0.394525	2.59255	0.521281	0.606994
4.71	1.98058	7.62165	1.24588	1.22808		4.71	0.394746	2.5971	0.519201	0.607837
4.71333	1.98226	7.62473	1.2474	1.2296		4.71333	0.395076	2.59866	0.518089	0.608014
4.71667	1.98603	7.62742	1.24431	1.22988		4.71667	0.396723	2.6021	0.51877	0.608103
4.72	1.99009	7.62774	1.24277	1.23194		4.72	0.397497	2.60445	0.5204	0.608299
4.72333	1.99158	7.62935	1.24205	1.23289		4.72333	0.397988	2.60764	0.523231	0.606726
4.72667	1.99358	7.63127	1.24206	1.2318		4.72667	0.398906	2.60966	0.526179	0.606622
4.73	1.99799	7.633	1.24226	1.22947		4.73	0.39962	2.61423	0.525973	0.606212
4.73333	2.00195	7.63475	1.24583	1.23031		4.73333	0.40017	2.61741	0.525393	0.607286
4.73667	2.00482	7.63672	1.24718	1.22889		4.73667	0.401679	2.62078	0.52439	0.606069
4.74	2.00813	7.63811	1.24119	1.2289		4.74	0.402905	2.62268	0.520912	0.605296
4.74333	2.0123	7.64004	1.24047	1.231		4.74333	0.40347	2.62804	0.518755	0.604933
4.74667	2.01402	7.63995	1.24539	1.23366		4.74667	0.405418	2.63049	0.517516	0.603983
4.75	2.016	7.64039	1.24219	1.23036		4.75	0.406511	2.63342	0.516071	0.603837
4.75333	2.01978	7.64365	1.23994	1.23087		4.75333	0.407844	2.63784	0.516497	0.602368
4.75667	2.02396	7.645	1.24857	1.22998		4.75667	0.408147	2.64187	0.517569	0.603792
4.76	2.02668	7.64771	1.24814	1.22827		4.76	0.41011	2.64418	0.520357	0.602775
4.76333	2.02961	7.65057	1.24406	1.2258		4.76333	0.411147	2.6494	0.521649	0.603074
4.76667	2.03147	7.65284	1.24614	1.22859		4.76667	0.410603	2.6534	0.523609	0.602192
4.77	2.03206	7.65303	1.24748	1.22959		4.77	0.411044	2.65746	0.522945	0.602016
4.77333	2.03497	7.6547	1.2457	1.22898		4.77333	0.411587	2.66175	0.521431	0.602141
4.77667	2.03635	7.65717	1.24597	1.23009		4.77667	0.412066	2.66522	0.51908	0.601555
4.78	2.04118	7.6573	1.24682	1.23189		4.78	0.412448	2.66706	0.517897	0.601755
4.78333	2.04436	7.65765	1.24756	1.22899		4.78333	0.414295	2.66831	0.515942	0.600692
4.78667	2.04856	7.66043	1.24974	1.22802		4.78667	0.413761	2.67092	0.515705	0.603281
4.79	2.05035	7.66202	1.24707	1.22997		4.79	0.414669	2.67264	0.516038	0.600795
4.79333	2.05503	7.66215	1.24793	1.23038		4.79333	0.414947	2.67778	0.516828	0.601019
4.79667	2.05549	7.66424	1.24536	1.2311		4.79667	0.415514	2.67982	0.517792	0.601499
4.8	2.05824	7.66692	1.24419	1.23538		4.8	0.416645	2.68516	0.518498	0.601062
4.80333	2.06142	7.66875	1.2436	1.23515		4.80333	0.418182	2.68926	0.518713	0.600109
4.80667	2.06482	7.67053	1.24477	1.23501		4.80667	0.419843	2.69308	0.517655	0.601289
4.81	2.06683	7.67128	1.24609	1.23345		4.81	0.419658	2.69524	0.516652	0.60263
4.81333	2.07035	7.67446	1.24535	1.23088		4.81333	0.420847	2.69882	0.515799	0.602431
4.81667	2.07403	7.67656	1.24587	1.22892		4.81667	0.421625	2.70132	0.513297	0.604103
4.82	2.07648	7.67864	1.24402	1.22856		4.82	0.42176	2.70202	0.512497	0.602843
4.82333	2.08137	7.68002	1.24302	1.22852		4.82333	0.421674	2.70488	0.512377	0.604317
4.82667	2.08376	7.68373	1.24049	1.22951		4.82667	0.422859	2.70719	0.511769	0.602293
4.83	2.08737	7.6848	1.24675	1.22896		4.83	0.424103	2.71237	0.514204	0.601022
4.83333	2.08962	7.68636	1.24078	1.22796		4.83333	0.424128	2.71716	0.516637	0.599662
4.83667	2.09374	7.6858	1.24312	1.2289		4.83667	0.425476	2.723	0.518842	0.601153
4.84	2.09407	7.6874	1.24377	1.22645		4.84	0.425769	2.72741	0.520865	0.599647
4.84333	2.09799	7.6889	1.24685	1.22624		4.84333	0.426602	2.73218	0.521003	0.599755
4.84667	2.09931	7.68973	1.24199	1.22836		4.84667	0.42605	2.73478	0.517445	0.599524
4.85	2.10339	7.69148	1.24863	1.22914		4.85	0.426644	2.73948	0.51612	0.598868
4.85333	2.10643	7.69579	1.24655	1.22854		4.85333	0.427713	2.74254	0.513992	0.59805
4.85667	2.10886	7.69778	1.24565	1.22979		4.85667	0.428021	2.74579	0.512054	0.598203
4.86	2.11164	7.69709	1.24511	1.22922		4.86	0.430249	2.74885	0.511612	0.599446
4.86333	2.11561	7.69897	1.24612	1.22834		4.86333	0.430981	2.75272	0.513003	0.599
4.86667	2.11682	7.7001	1.24606	1.22853		4.86667	0.432386	2.75484	0.513615	0.597866
4.87	2.11989	7.70308	1.24611	1.22697		4.87	0.431301	2.75662	0.515229	0.597715
4.87333	2.12392	7.70294	1.25007	1.22774		4.87333	0.433687	2.75986	0.517011	0.597285
4.87667	2.12659	7.7049	1.24619	1.22706		4.87667	0.43406	2.76403	0.518527	0.597564
4.88	2.12934	7.70775	1.24725	1.22693		4.88	0.436296	2.76763	0.520141	0.598483
4.88333	2.13343	7.70869	1.24598	1.22797		4.88333	0.436828	2.77024	0.520586	0.600144
4.88667	2.13662	7.70895	1.24592	1.22789		4.88667	0.439309	2.77578	0.518483	0.598721
4.89	2.13984	7.71113	1.24471	1.22649		4.89	0.439829	2.7801	0.515891	0.598156
4.89333	2.14273	7.71386	1.24481	1.22945		4.89333	0.438849	2.78372	0.514679	0.594764
4.89667	2.14595	7.71393	1.24241	1.23058		4.89667	0.438685	2.78647	0.511611	0.595636
4.9	2.14906	7.71616	1.24411	1.22894		4.9	0.439517	2.78997	0.509723	0.59459
4.90333	2.15343	7.71719	1.24607	1.23133		4.90333	0.439242	2.79179	0.509482	0.595113
4.90667	2.15646	7.72026	1.24513	1.23206		4.90667	0.440305	2.79556	0.510752	0.595264
4.91	2.16043	7.72188	1.24565	1.22871		4.91	0.441689	2.79806	0.509896	0.596155
4.91333	2.16326	7.72385	1.2479	1.22675		4.91333	0.442978	2.80331	0.511388	0.595328
4.91667	2.16617	7.72596	1.24839	1.22444		4.91667	0.443271	2.80778	0.514535	0.596834
4.92	2.16881	7.72832	1.24676	1.22337		4.92	0.445569	2.81118	0.516387	0.597264
4.92333	2.17213	7.73015	1.24749	1.22349		4.92333	0.444993	2.81211	0.516667	0.597378
4.92667	2.17521	7.73183	1.24904	1.22606		4.92667	0.445565	2.81561	0.518018	0.597056
4.93	2.17859	7.73209	1.24583	1.22614		4.93	0.445796	2.81863	0.517537	0.597534
4.93333	2.18156	7.73341	1.24456	1.22843		4.93333	0.446916	2.82039	0.515444	0.595849
4.93667	2.18455	7.73501	1.24672	1.22718		4.93667	0.44723	2.82463	0.512203	0.596347
4.94	2.18682	7.73503	1.24596	1.22755		4.94	0.448996	2.83016	0.510306	0.595581
4.94333	2.18783	7.73513	1.24375	1.2258		4.94333	0.449669	2.83351	0.509808	0.595922
4.94667	2.19129	7.73917	1.2497	1.22657		4.94667	0.451147	2.8356	0.508307	0.59683
4.95	2.1941	7.7408	1.2481	1.22639		4.95	0.452046	2.83895	0.508113	0.597078
4.95333	2.19635	7.74269	1.24591	1.22689		4.95333	0.453272	2.84129	0.510541	0.5965
4.95667	2.19967	7.74455	1.24678	1.22499		4.95667	0.454906	2.84363	0.512108	0.594941
4.96	2.20418	7.74732	1.24984	1.22642		4.96	0.456473	2.84757	0.51302	0.595888
4.96333	2.20737	7.74761	1.24436	1.22818		4.96333	0.455471	2.8517	0.514932	0.592356
4.96667	2.21108	7.74894	1.24378	1.22643		4.96667	0.457523	2.85564	0.51576	0.593126
4.97	2.21533	7.74977	1.2438	1.22762		4.97	0.457207	2.8596	0.51427	0.591592
4.97333	2.21695	7.7515	1.24299	1.23019		4.97333	0.456261	2.86518	0.513007	0.594284
4.97667	2.21859	7.75264	1.24311	1.22904		4.97667	0.457489	2.86807	0.510503	0.593818
4.98	2.22009	7.75548	1.24299	1.22559		4.98	0.458676	2.87135	0.50805	0.595358
4.98333	2.22198	7.75678	1.24366	1.2285		4.98333	0.458548	2.87515	0.505565	0.593045
4.98667	2.22538	7.75752	1.24394	1.22744		4.98667	0.458738	2.87802	0.505297	0.593253
4.99	2.23042	7.75903	1.24501	1.22799		4.99	0.459901	2.88222	0.504132	0.591598
4.99333	2.23502	7.76028	1.24251	1.22743		4.99333	0.460361	2.88384	0.504963	0.590147
4.99667	2.23766	7.76002	1.24674	1.2303		4.99667	0.461873	2.88663	0.506055	0.588497
5	2.23984	7.76072	1.24684	1.22827		5	0.462778	2.88918	0.506951	0.589637
5.00333	2.24187	7.76351	1.24369	1.22825		5.00333	0.464066	2.89332	0.508846	0.58997
5.00667	2.24337	7.76288	1.24209	1.22704		5.00667	0.465794	2.89517	0.510762	0.591457
5.01	2.24523	7.76474	1.24666	1.22751		5.01	0.466597	2.89963	0.510861	0.592239
5.01333	2.24769	7.76658	1.24231	1.2273		5.01333	0.467667	2.9027	0.510544	0.592825
5.01667	2.25275	7.76928	1.2391	1.22793		5.01667	0.467437	2.90614	0.510889	0.591645
5.02	2.25655	7.77117	1.24415	1.23017		5.02	0.46761	2.90862	0.509347	0.590647
5.02333	2.25881	7.77389	1.24335	1.22753		5.02333	0.468243	2.91283	0.507053	0.590452
5.02667	2.26266	7.77557	1.24059	1.22964		5.02667	0.46899	2.91814	0.505784	0.590073
5.03	2.26643	7.77687	1.24282	1.22647		5.03	0.469535	2.9229	0.505078	0.590693
5.03333	2.26826	7.77774	1.24655	1.22798		5.03333	0.471259	2.9274	0.502614	0.590341
5.03667	2.27115	7.77981	1.24649	1.2255		5.03667	0.473755	2.93196	0.501785	0.59077
5.04	2.27433	7.78215	1.25087	1.22793		5.04	0.474812	2.93468	0.504067	0.588538
5.04333	2.27651	7.78228	1.24963	1.22425		5.04333	0.475992	2.93626	0.504524	0.58872
5.04667	2.27974	7.78335	1.25197	1.22597		5.04667	0.477951	2.9386	0.506603	0.587376
5.05	2.28375	7.78458	1.24994	1.22506		5.05	0.478653	2.94123	0.509601	0.589316
5.05333	2.28626	7.78453	1.24623	1.22599		5.05333	0.478125	2.9446	0.512276	0.588791
5.05667	2.2892	7.78438	1.24559	1.22387		5.05667	0.479123	2.94707	0.512043	0.589583
5.06	2.29132	7.78762	1.2509	1.22686		5.06	0.478946	2.95131	0.511547	0.588134
5.06333	2.29513	7.79021	1.247	1.2268		5.06333	0.47932	2.9543	0.511002	0.588825
5.06667	2.29638	7.79257	1.24568	1.22736		5.06667	0.47924	2.95814	0.510044	0.587234
5.07	2.30043	7.79491	1.24848	1.22574		5.07	0.481762	2.96077	0.506532	0.587433
5.07333	2.30481	7.79918	1.24497	1.22855		5.07333	0.482243	2.96355	0.50663	0.585699
5.07667	2.30942	7.79957	1.24193	1.22615		5.07667	0.483957	2.96689	0.505776	0.58849
5.08	2.31221	7.80147	1.24228	1.2269		5.08	0.483923	2.97046	0.503804	0.588211
5.08333	2.31484	7.80163	1.24713	1.226		5.08333	0.485632	2.97218	0.502041	0.588317
5.08667	2.31795	7.80311	1.24635	1.22667		5.08667	0.486177	2.9761	0.502063	0.588141
5.09	2.32045	7.80459	1.24836	1.22566		5.09	0.487017	2.97902	0.500136	0.590148
5.09333	2.32246	7.80672	1.24639	1.22635		5.09333	0.486532	2.98076	0.503325	0.586411
5.09667	2.32506	7.80688	1.24826	1.22709		5.09667	0.487242	2.98418	0.502999	0.586813
5.1	2.32816	7.8098	1.24613	1.22662		5.1	0.488386	2.98815	0.504311	0.586494
5.10333	2.33018	7.81207	1.24471	1.22773		5.10333	0.487574	2.99241	0.505804	0.585447
5.10667	2.33397	7.81131	1.24285	1.22573		5.10667	0.487653	2.99534	0.50684	0.583983
5.11	2.33639	7.81222	1.24223	1.22533		5.11	0.489299	3.00057	0.504794	0.586475
5.11333	2.33857	7.81391	1.24117	1.22241		5.11333	0.48974	3.00261	0.505822	0.584823
5.11667	2.34216	7.81329	1.24149	1.22236		5.11667	0.490897	3.00816	0.505932	0.585322
5.12	2.34661	7.81401	1.24143	1.22128		5.12	0.492766	3.00897	0.505	0.585493
5.12333	2.34734	7.81551	1.24158	1.22323		5.12333	0.494222	3.01357	0.504355	0.585473
5.12667	2.35136	7.8154	1.2469	1.22262		5.12667	0.495208	3.0162	0.503011	0.584213
5.13	2.35419	7.81658	1.24351	1.22518		5.13	0.49624	3.02146	0.501376	0.584803
5.13333	2.35722	7.81884	1.24093	1.22595		5.13333	0.49688	3.02222	0.500371	0.585209
5.13667	2.35925	7.82094	1.24639	1.22596		5.13667	0.496529	3.02745	0.501258	0.584574
5.14	2.36272	7.82346	1.24805	1.22458		5.14	0.497028	3.03015	0.501728	0.585549
5.14333	2.36574	7.82615	1.24223	1.22539		5.14333	0.497841	3.03222	0.503059	0.584113
5.14667	2.36871	7.82724	1.2456	1.22358		5.14667	0.49829	3.03443	0.505254	0.584391
5.15	2.37064	7.82896	1.24667	1.22315		5.15	0.498298	3.03636	0.505629	0.584298
5.15333	2.37472	7.83028	1.24464	1.22414		5.15333	0.499991	3.03973	0.505389	0.585253
5.15667	2.37735	7.83199	1.24151	1.22258		5.15667	0.500024	3.04553	0.504214	0.584106
5.16	2.37894	7.83422	1.24372	1.22255		5.16	0.501961	3.04959	0.504636	0.586702
5.16333	2.38151	7.83464	1.24563	1.22401		5.16333	0.503413	3.05389	0.502985	0.585038
5.16667	2.38415	7.83757	1.24733	1.22382		5.16667	0.50528	3.05843	0.502369	0.583799
5.17	2.38689	7.83981	1.24676	1.22392		5.17	0.506457	3.06211	0.501163	0.583477
5.17333	2.39065	7.84149	1.24905	1.22777		5.17333	0.507597	3.06343	0.500788	0.583733
5.17667	2.3937	7.84237	1.24669	1.22647		5.17667	0.507093	3.06665	0.498489	0.583245
5.18	2.39627	7.84526	1.2446	1.22541		5.18	0.508759	3.06963	0.498836	0.585471
5.18333	2.39903	7.84584	1.24321	1.2271		5.18333	0.509224	3.07231	0.498446	0.584284
5.18667	2.40111	7.8473	1.2431	1.22608		5.18667	0.510405	3.07462	0.49938	0.583745
5.19	2.40343	7.84826	1.24286	1.22559		5.19	0.511977	3.07901	0.501344	0.582238
5.19333	2.40472	7.84955	1.24224	1.22595		5.19333	0.513899	3.08342	0.502522	0.582024
5.19667	2.40742	7.85172	1.24748	1.22473		5.19667	0.514723	3.08696	0.505123	0.57904
5.2	2.41084	7.85137	1.24562	1.22389		5.2	0.515786	3.09138	0.505412	0.580951
5.20333	2.41382	7.85157	1.24623	1.22351		5.20333	0.515682	3.0955	0.505397	0.580949
5.20667	2.41693	7.85245	1.25094	1.22237		5.20667	0.515532	3.0961	0.505914	0.581613
5.21	2.42197	7.85488	1.24866	1.22416		5.21	0.5154	3.09833	0.506247	0.581809
5.21333	2.4256	7.85635	1.24145	1.22518		5.21333	0.515597	3.10222	0.504598	0.582969
5.21667	2.42839	7.8584	1.24806	1.22252		5.21667	0.515684	3.10511	0.504445	0.580762
5.22	2.4325	7.86176	1.24654	1.22423		5.22	0.516784	3.10725	0.503872	0.580664
5.22333	2.43517	7.86219	1.24208	1.22311		5.22333	0.517437	3.1114	0.502731	0.580366
5.22667	2.43813	7.86365	1.24679	1.22339		5.22667	0.51835	3.1146	0.500907	0.579156
5.23	2.44023	7.8632	1.24933	1.22462		5.23	0.518467	3.11718	0.499655	0.578916
5.23333	2.44218	7.8658	1.24525	1.22681		5.23333	0.520151	3.12008	0.499916	0.580029
5.23667	2.44466	7.86527	1.2451	1.22489		5.23667	0.520896	3.12279	0.498923	0.580969
5.24	2.44691	7.86757	1.24711	1.22668		5.24	0.522678	3.12537	0.499149	0.581712
5.24333	2.44903	7.86835	1.24413	1.22377		5.24333	0.523065	3.12777	0.500191	0.581761
5.24667	2.45322	7.86963	1.24218	1.22394		5.24667	0.525209	3.12935	0.500232	0.582907
5.25	2.45696	7.87082	1.24339	1.22426		5.25	0.525816	3.13319	0.501495	0.581365
5.25333	2.45954	7.87256	1.24371	1.22519		5.25333	0.52518	3.13616	0.501801	0.580736
5.25667	2.46276	7.87477	1.243	1.2245		5.25667	0.525787	3.13994	0.500449	0.578057
5.26	2.46459	7.8743	1.24329	1.22675		5.26	0.526498	3.14484	0.501556	0.578401
5.26333	2.46675	7.87656	1.24779	1.22295		5.26333	0.526174	3.15039	0.502177	0.57604
5.26667	2.47064	7.87691	1.24544	1.2219		5.26667	0.526878	3.15155	0.499292	0.576269
5.27	2.47521	7.8784	1.24817	1.22038		5.27	0.527725	3.15514	0.499247	0.575314
5.27333	2.47907	7.87881	1.24422	1.22086		5.27333	0.528384	3.15854	0.498418	0.57686
5.27667	2.4833	7.88108	1.24643	1.22025		5.27667	0.530282	3.1601	0.496591	0.576559
5.28	2.48525	7.88346	1.24284	1.22286		5.28	0.531962	3.16089	0.494917	0.578223
5.28333	2.4867	7.88521	1.24491	1.22233		5.28333	0.532953	3.16441	0.496299	0.57915
5.28667	2.4887	7.88616	1.24269	1.22426		5.28667	0.535965	3.16807	0.495736	0.579291
5.29	2.49176	7.88721	1.24701	1.2249		5.29	0.537461	3.17077	0.496243	0.580467
5.29333	2.49431	7.88959	1.24647	1.22415		5.29333	0.537648	3.1747	0.495482	0.579559
5.29667	2.49742	7.8907	1.24766	1.22562		5.29667	0.538619	3.17871	0.496505	0.577442
5.3	2.50098	7.892	1.24709	1.22626		5.3	0.538908	3.18506	0.496014	0.576573
5.30333	2.50378	7.89522	1.248	1.2255		5.30333	0.539852	3.1883	0.496151	0.576804
5.30667	2.50569	7.89806	1.24253	1.22384		5.30667	0.540317	3.19215	0.496131	0.574494
5.31	2.50872	7.89956	1.2469	1.2239		5.31	0.541118	3.19481	0.497824	0.574415
5.31333	2.51291	7.90112	1.24884	1.22124		5.31333	0.541985	3.19824	0.49809	0.576141
5.31667	2.51603	7.90296	1.24163	1.21997		5.31667	0.543043	3.19814	0.498366	0.576646
5.32	2.51835	7.90281	1.24429	1.22022		5.32	0.543517	3.2018	0.499287	0.575613
5.32333	2.52293	7.90359	1.24509	1.22084		5.32333	0.544123	3.20467	0.497449	0.57756
5.32667	2.52594	7.90381	1.24258	1.22121		5.32667	0.544346	3.20837	0.496742	0.576933
5.33	2.52733	7.90468	1.24076	1.22163		5.33	0.544975	3.21164	0.494824	0.576272
5.33333	2.5291	7.90443	1.24736	1.22313		5.33333	0.546018	3.216	0.493614	0.574879
5.33667	2.53109	7.90659	1.24341	1.22144		5.33667	0.546143	3.21849	0.491884	0.575212
5.34	2.5339	7.90859	1.24553	1.2195		5.34	0.547049	3.22044	0.492638	0.574798
5.34333	2.53562	7.9094	1.24386	1.22109		5.34333	0.547455	3.22323	0.493052	0.575194
5.34667	2.53894	7.90884	1.24434	1.22095		5.34667	0.547909	3.22742	0.494903	0.573501
5.35	2.54174	7.91024	1.24531	1.22042		5.35	0.548844	3.2307	0.496818	0.575585
5.35333	2.54586	7.90995	1.24536	1.22117		5.35333	0.548976	3.23434	0.498969	0.575077
5.35667	2.54808	7.90895	1.24907	1.22358		5.35667	0.549101	3.23872	0.500865	0.574067
5.36	2.55197	7.9112	1.24719	1.22189		5.36	0.550818	3.24298	0.499862	0.573374
5.36333	2.5543	7.91305	1.2492	1.22234		5.36333	0.55115	3.24413	0.498886	0.575931
5.36667	2.5572	7.91542	1.24628	1.22016		5.36667	0.551987	3.24592	0.498457	0.573424
5.37	2.55987	7.91722	1.24199	1.21976		5.37	0.55413	3.24891	0.496709	0.573703
5.37333	2.56251	7.92083	1.23852	1.21984		5.37333	0.555918	3.25134	0.494532	0.572925
5.37667	2.56532	7.92132	1.24594	1.22013		5.37667	0.555981	3.25279	0.493416	0.575013
5.38	2.56866	7.92435	1.24287	1.21952		5.38	0.557781	3.25713	0.492279	0.573191
5.38333	2.57177	7.92487	1.23896	1.22089		5.38333	0.559533	3.26146	0.49072	0.575522
5.38667	2.57517	7.92642	1.2435	1.22194		5.38667	0.561351	3.26457	0.490253	0.57394
5.39	2.57831	7.92755	1.24231	1.22077		5.39	0.561932	3.26842	0.489366	0.574807
5.39333	2.57969	7.92968	1.23698	1.22189		5.39333	0.56307	3.2723	0.489423	0.57143
5.39667	2.58223	7.9294	1.23947	1.22265		5.39667	0.563326	3.27395	0.489129	0.572566
5.4	2.58461	7.9316	1.24514	1.224		5.4	0.562677	3.27862	0.48894	0.571206
5.40333	2.58561	7.93222	1.24513	1.22278		5.40333	0.561289	3.28188	0.490183	0.572525
5.40667	2.59042	7.93303	1.24821	1.22329		5.40667	0.561222	3.28301	0.494095	0.571313
5.41	2.59368	7.93403	1.24785	1.22009		5.41	0.562404	3.28711	0.495031	0.571826
5.41333	2.59622	7.93611	1.24482	1.22006		5.41333	0.563489	3.29139	0.498185	0.570024
5.41667	2.59797	7.93686	1.24483	1.21829		5.41667	0.564895	3.29394	0.499503	0.569801
5.42	2.60094	7.93888	1.24673	1.21825		5.42	0.567333	3.29688	0.498482	0.569543
5.42333	2.60298	7.9412	1.24585	1.21546		5.42333	0.568421	3.30167	0.49512	0.572006
5.42667	2.60716	7.94119	1.24476	1.2187		5.42667	0.569567	3.30385	0.494616	0.571877
5.43	2.60967	7.94203	1.24607	1.21725		5.43	0.570227	3.30742	0.491213	0.572806
5.43333	2.61439	7.94264	1.25008	1.21787		5.43333	0.571164	3.31058	0.48831	0.571449
5.43667	2.6184	7.94376	1.2473	1.21684		5.43667	0.570086	3.31433	0.486982	0.570093
5.44	2.62224	7.94216	1.24867	1.21964		5.44	0.572229	3.31814	0.487501	0.568131
5.44333	2.62283	7.94476	1.24956	1.21649		5.44333	0.572991	3.32016	0.486197	0.569297
5.44667	2.62587	7.94542	1.24813	1.21726		5.44667	0.574449	3.32299	0.486513	0.569644
5.45	2.62739	7.94803	1.24575	1.21924		5.45	0.573787	3.32525	0.488348	0.571319
5.45333	2.62956	7.94926	1.24888	1.21978		5.45333	0.575517	3.32715	0.489469	0.570422
5.45667	2.63239	7.95206	1.24832	1.21942		5.45667	0.575222	3.32962	0.48914	0.569864
5.46	2.63677	7.95315	1.2477	1.22201		5.46	0.576903	3.33277	0.491064	0.569778
5.46333	2.63957	7.95324	1.24888	1.22084		5.46333	0.577903	3.33675	0.492992	0.567389
5.46667	2.64216	7.95395	1.24775	1.21755		5.46667	0.578711	3.34042	0.494933	0.567396
5.47	2.64471	7.9542	1.24553	1.2163		5.47	0.580039	3.34383	0.496391	0.569954
5.47333	2.64621	7.9559	1.24366	1.21713		5.47333	0.581476	3.34593	0.497148	0.569364
5.47667	2.64774	7.95725	1.2475	1.21525		5.47667	0.581874	3.34874	0.496958	0.568154
5.48	2.65076	7.96057	1.24493	1.21477		5.48	0.581571	3.35136	0.495826	0.56959
5.48333	2.65505	7.96235	1.24674	1.2168		5.48333	0.585571	3.3534	0.493634	0.568906
5.48667	2.65718	7.96602	1.24655	1.21747		5.48667	0.585369	3.35713	0.491873	0.567086
5.49	2.6607	7.96892	1.24779	1.21565		5.49	0.585618	3.3625	0.489399	0.566889
5.49333	2.66439	7.96962	1.24162	1.21807		5.49333	0.585614	3.36561	0.488909	0.567457
5.49667	2.66594	7.97078	1.24368	1.22012		5.49667	0.586223	3.36748	0.487105	0.565996
5.5	2.66832	7.97086	1.24005	1.2187		5.5	0.584706	3.37259	0.487551	0.565196
5.50333	2.67176	7.97017	1.24159	1.21938		5.50333	0.586605	3.37666	0.487264	0.565567
5.50667	2.67372	7.97074	1.24266	1.21829		5.50667	0.587935	3.37855	0.487644	0.564897
5.51	2.67425	7.97181	1.24798	1.21841		5.51	0.588538	3.38271	0.489073	0.564039
5.51333	2.67597	7.9718	1.24659	1.2182		5.51333	0.590668	3.3873	0.490221	0.565204
5.51667	2.67729	7.97419	1.24678	1.21872		5.51667	0.592274	3.38867	0.490143	0.56668
5.52	2.68033	7.97484	1.24639	1.21768		5.52	0.591718	3.39018	0.492458	0.567626
5.52333	2.68409	7.97566	1.24455	1.221		5.52333	0.593518	3.39316	0.494727	0.567439
5.52667	2.68888	7.97717	1.24081	1.22085		5.52667	0.594718	3.39595	0.492793	0.567331
5.53	2.69257	7.98052	1.2438	1.22118		5.53	0.594543	3.39842	0.493567	0.565814
5.53333	2.69764	7.98157	1.246	1.22146		5.53333	0.595204	3.40154	0.492713	0.565217
5.53667	2.69954	7.98316	1.24642	1.22189		5.53667	0.596221	3.4052	0.489869	0.564138
5.54	2.70133	7.98458	1.24487	1.22009		5.54	0.596573	3.40823	0.486679	0.565722
5.54333	2.70571	7.98639	1.24685	1.21911		5.54333	0.596704	3.41006	0.485844	0.563806
5.54667	2.70956	7.98729	1.24324	1.21877		5.54667	0.599189	3.41345	0.484219	0.565299
5.55	2.71045	7.98821	1.24234	1.21817		5.55	0.60024	3.4159	0.48357	0.564197
5.55333	2.71281	7.99099	1.24411	1.2198		5.55333	0.602048	3.41802	0.482715	0.565078
5.55667	2.71623	7.99224	1.24513	1.21991		5.55667	0.602525	3.42206	0.483182	0.563311
5.56	2.71794	7.99311	1.24336	1.21995		5.56	0.604388	3.42619	0.482776	0.56582
5.56333	2.72243	7.99341	1.24535	1.21899		5.56333	0.603693	3.4296	0.483917	0.564161
5.56667	2.7265	7.99395	1.2435	1.21961		5.56667	0.604727	3.43331	0.484465	0.56483
5.57	2.73018	7.99434	1.23961	1.21859		5.57	0.605141	3.43561	0.4851	0.562868
5.57333	2.73431	7.99476	1.24133	1.21784		5.57333	0.606429	3.43751	0.487609	0.564151
5.57667	2.73682	7.996	1.24706	1.21735		5.57667	0.60739	3.43896	0.489666	0.561749
5.58	2.73847	7.99784	1.24472	1.21828		5.58	0.60975	3.44071	0.490458	0.562802
5.58333	2.74025	7.99869	1.24188	1.21757		5.58333	0.610283	3.44195	0.49073	0.56195
5.58667	2.7424	7.99906	1.24244	1.21827		5.58667	0.611179	3.44551	0.491121	0.563986
5.59	2.74477	8.00102	1.24175	1.21788		5.59	0.611681	3.44782	0.488622	0.562308
5.59333	2.74633	8.00199	1.23789	1.21735		5.59333	0.613362	3.4537	0.487866	0.564775
5.59667	2.74783	8.003	1.23918	1.21882		5.59667	0.612171	3.45676	0.485358	0.564066
5.6	2.7501	8.00452	1.24351	1.21887		5.6	0.613114	3.46182	0.483356	0.563888
5.60333	2.75259	8.00731	1.24225	1.2188		5.60333	0.614901	3.46552	0.48254	0.561454
5.60667	2.75501	8.00697	1.24446	1.21899		5.60667	0.615255	3.46767	0.482489	0.563376
5.61	2.75726	8.00662	1.24387	1.21872		5.61	0.615466	3.47018	0.480544	0.560781
5.61333	2.75953	8.00805	1.24657	1.217		5.61333	0.616738	3.47271	0.480057	0.56232
5.61667	2.76382	8.00949	1.24589	1.21589		5.61667	0.617345	3.47709	0.479714	0.561045
5.62	2.76493	8.0093	1.24738	1.21555		5.62	0.618285	3.48004	0.479727	0.562695
5.62333	2.76836	8.01244	1.24791	1.21669		5.62333	0.61997	3.48438	0.480111	0.561402
5.62667	2.77254	8.01601	1.2481	1.21465		5.62667	0.621127	3.4879	0.481141	0.563003
5.63	2.77593	8.0175	1.24929	1.21373		5.63	0.621623	3.49203	0.483938	0.561005
5.63333	2.77806	8.01958	1.24808	1.21417		5.63333	0.622168	3.49368	0.486074	0.562695
5.63667	2.78194	8.02092	1.24988	1.214		5.63667	0.621564	3.49696	0.486912	0.55972
5.64	2.78518	8.02079	1.24969	1.21389		5.64	0.622734	3.49941	0.487514	0.559815
5.64333	2.78634	8.02137	1.24769	1.21533		5.64333	0.621658	3.50074	0.487071	0.558243
5.64667	2.78847	8.02031	1.24414	1.2181		5.64667	0.622692	3.50376	0.485165	0.559683
5.65	2.79145	8.01949	1.24681	1.21912		5.65	0.624611	3.50583	0.4845	0.558048
5.65333	2.79458	8.02036	1.2446	1.21838		5.65333	0.62545	3.50738	0.48323	0.559774
5.65667	2.79617	8.02194	1.2438	1.21695		5.65667	0.625745	3.5106	0.481022	0.56103
5.66	2.80068	8.02396	1.24475	1.21839		5.66	0.628348	3.51343	0.481279	0.561877
5.66333	2.8037	8.02688	1.24814	1.21591		5.66333	0.629182	3.51665	0.480966	0.55898
5.66667	2.8047	8.03004	1.2452	1.21352		5.66667	0.630218	3.51934	0.479461	0.559517
5.67	2.8074	8.03243	1.2449	1.21346		5.67	0.631739	3.52342	0.479476	0.558041
5.67333	2.8105	8.03539	1.24277	1.2176		5.67333	0.633106	3.52662	0.48001	0.555863
5.67667	2.81142	8.03552	1.24448	1.21588		5.67667	0.632631	3.52995	0.480992	0.554856
5.68	2.81508	8.03652	1.2429	1.21708		5.68	0.635092	3.53191	0.481742	0.55684
5.68333	2.8181	8.03806	1.24522	1.22035		5.68333	0.635538	3.53609	0.483342	0.557081
5.68667	2.82121	8.03894	1.24645	1.22055		5.68667	0.636012	3.53822	0.483678	0.559127
5.69	2.82565	8.0384	1.2487	1.21545		5.69	0.636863	3.5403	0.485117	0.560911
5.69333	2.82905	8.03952	1.24903	1.21598		5.69333	0.637794	3.54231	0.483858	0.560152
5.69667	2.83121	8.0414	1.25106	1.21605		5.69667	0.638055	3.54454	0.482588	0.559908
5.7	2.83474	8.042	1.25015	1.21503		5.7	0.63979	3.54659	0.481771	0.559371
5.70333	2.83723	8.04388	1.25192	1.21282		5.70333	0.641629	3.5491	0.482283	0.557487
5.70667	2.83958	8.04588	1.24966	1.21524		5.70667	0.641633	3.55391	0.481609	0.556195
5.71	2.84318	8.04773	1.25082	1.21354		5.71	0.642182	3.55723	0.480793	0.557762
5.71333	2.84622	8.04781	1.24723	1.21236		5.71333	0.643593	3.56057	0.480535	0.555919
5.71667	2.84735	8.04865	1.24712	1.21072		5.71667	0.642783	3.56378	0.480132	0.555643
5.72	2.85127	8.04966	1.24694	1.21516		5.72	0.643377	3.56527	0.478648	0.553787
5.72333	2.85396	8.05225	1.24392	1.21323		5.72333	0.644739	3.56652	0.476689	0.553608
5.72667	2.85523	8.05169	1.23994	1.21548		5.72667	0.646594	3.56924	0.476088	0.553294
5.73	2.85671	8.05241	1.24333	1.21588		5.73	0.647337	3.57151	0.476796	0.554468
5.73333	2.86055	8.05359	1.24804	1.21485		5.73333	0.648704	3.57294	0.476633	0.552989
5.73667	2.86074	8.05397	1.24386	1.21269		5.73667	0.649669	3.57662	0.477243	0.556811
5.74	2.8643	8.05368	1.24733	1.21301		5.74	0.65017	3.57945	0.481135	0.555407
5.74333	2.86733	8.05551	1.24817	1.21287		5.74333	0.651245	3.5834	0.482904	0.554249
5.74667	2.87038	8.05724	1.2497	1.21311		5.74667	0.652024	3.58845	0.483726	0.555022
5.75	2.87331	8.05646	1.24332	1.21717		5.75	0.65198	3.59209	0.484625	0.556135
5.75333	2.87713	8.05715	1.24838	1.21675		5.75333	0.65343	3.59478	0.484673	0.553481
5.75667	2.87743	8.05865	1.24761	1.21663		5.75667	0.654602	3.59822	0.483353	0.554935
5.76	2.88122	8.06078	1.25004	1.21395		5.76	0.655428	3.59897	0.482293	0.555139
5.76333	2.88303	8.06102	1.24525	1.21409		5.76333	0.656678	3.60025	0.481424	0.552457
5.76667	2.88491	8.06428	1.24505	1.21288		5.76667	0.658586	3.60396	0.480559	0.552142
5.77	2.88606	8.06612	1.2438	1.21397		5.77	0.659607	3.60686	0.479874	0.552542
5.77333	2.89087	8.06709	1.24271	1.21254		5.77333	0.659906	3.61068	0.478225	0.551509
5.77667	2.89299	8.06836	1.24194	1.21279		5.77667	0.660265	3.61424	0.475923	0.551441
5.78	2.89653	8.0698	1.24214	1.21428		5.78	0.661293	3.61715	0.47295	0.551023
5.78333	2.89871	8.07105	1.24353	1.21366		5.78333	0.662727	3.6202	0.472118	0.550342
5.78667	2.90252	8.07072	1.24201	1.21339		5.78667	0.662385	3.62455	0.472584	0.550537
5.79	2.90433	8.07154	1.24326	1.21636		5.79	0.663768	3.62596	0.472683	0.549976
5.79333	2.90799	8.07065	1.24628	1.21789		5.79333	0.666084	3.62884	0.475138	0.550824
5.79667	2.90941	8.0711	1.24476	1.21577		5.79667	0.666549	3.63167	0.478402	0.552544
5.8	2.91453	8.07152	1.24714	1.21582		5.8	0.666581	3.63323	0.479195	0.552246
5.80333	2.91621	8.0735	1.24623	1.21539		5.80333	0.668693	3.63588	0.480569	0.5511
5.80667	2.92	8.07472	1.24878	1.21457		5.80667	0.668024	3.63688	0.481601	0.551183
5.81	2.92095	8.07763	1.24218	1.21352		5.81	0.666726	3.64184	0.482104	0.550097
5.81333	2.92449	8.07928	1.24479	1.21285		5.81333	0.667519	3.64347	0.481897	0.549257
5.81667	2.92474	8.07965	1.24074	1.2116		5.81667	0.669089	3.64714	0.482017	0.550726
5.82	2.92816	8.08171	1.23956	1.21129		5.82	0.668852	3.64962	0.480351	0.551641
5.82333	2.92954	8.08396	1.24141	1.21223		5.82333	0.671996	3.6552	0.478967	0.551742
5.82667	2.93308	8.08385	1.24475	1.21191		5.82667	0.674434	3.6562	0.477945	0.550114
5.83	2.93495	8.08572	1.23989	1.21235		5.83	0.675307	3.66059	0.476109	0.551075
5.83333	2.93786	8.08821	1.24502	1.21191		5.83333	0.676908	3.66235	0.474577	0.549724
5.83667	2.94174	8.08945	1.2475	1.21351		5.83667	0.678195	3.66475	0.473769	0.550436
5.84	2.94532	8.09043	1.24134	1.21153		5.84	0.678567	3.66724	0.471708	0.54924
5.84333	2.94636	8.0909	1.24117	1.21311		5.84333	0.67942	3.67094	0.470656	0.551778
5.84667	2.94992	8.09155	1.24388	1.21272		5.84667	0.679882	3.67404	0.470834	0.54976
5.85	2.95192	8.09413	1.24283	1.21386		5.85	0.67954	3.67655	0.471797	0.550784
5.85333	2.95329	8.09406	1.23912	1.21201		5.85333	0.680403	3.68048	0.472255	0.550147
5.85667	2.95635	8.09416	1.2431	1.21156		5.85667	0.680148	3.68202	0.475189	0.550194
5.86	2.96045	8.09693	1.24518	1.2119		5.86	0.680556	3.68431	0.476862	0.549553
5.86333	2.96215	8.0995	1.24568	1.21018		5.86333	0.681323	3.68654	0.478614	0.551344
5.86667	2.96656	8.09956	1.24599	1.21296		5.86667	0.680418	3.68982	0.478406	0.549548
5.87	2.97032	8.09992	1.24917	1.21276		5.87	0.680949	3.69185	0.480132	0.549719
5.87333	2.97424	8.10207	1.24267	1.21444		5.87333	0.68348	3.69467	0.479986	0.549832
5.87667	2.97496	8.10293	1.23849	1.21351		5.87667	0.683538	3.69651	0.478772	0.549917
5.88	2.97775	8.10164	1.24265	1.2164		5.88	0.684594	3.70024	0.477702	0.547395
5.88333	2.97863	8.10126	1.24265	1.21382		5.88333	0.686707	3.7034	0.477297	0.548665
5.88667	2.98047	8.10144	1.24145	1.21442		5.88667	0.688145	3.70647	0.476143	0.546618
5.89	2.98143	8.1031	1.24604	1.21478		5.89	0.688206	3.70892	0.476345	0.547486
5.89333	2.98311	8.10341	1.24837	1.21426		5.89333	0.689713	3.71292	0.47509	0.545245
5.89667	2.98605	8.10528	1.24699	1.21432		5.89667	0.690872	3.71578	0.475201	0.547298
5.9	2.98798	8.10563	1.24501	1.21386		5.9	0.692628	3.71787	0.475067	0.545505
5.90333	2.98901	8.10896	1.24842	1.21339		5.90333	0.693424	3.72154	0.474	0.547904
5.90667	2.99221	8.10864	1.24657	1.21426		5.90667	0.695132	3.72504	0.471769	0.545976
5.91	2.99566	8.11136	1.2455	1.21596		5.91	0.696759	3.72761	0.472159	0.548264
5.91333	2.99797	8.11202	1.24339	1.21671		5.91333	0.697969	3.73097	0.471192	0.545402
5.91667	3.00112	8.11326	1.24296	1.21606		5.91667	0.699091	3.73404	0.469806	0.546828
5.92	3.00459	8.11397	1.2398	1.21654		5.92	0.698825	3.7347	0.47013	0.545762
5.92333	3.00728	8.11593	1.24367	1.21367		5.92333	0.698671	3.73829	0.472543	0.547302
5.92667	3.01126	8.11561	1.2426	1.21145		5.92667	0.700236	3.74045	0.472215	0.547681
5.93	3.01415	8.11811	1.2441	1.21019		5.93	0.700124	3.74196	0.47372	0.550713
5.93333	3.0169	8.1208	1.24439	1.21099		5.93333	0.701208	3.74391	0.476222	0.549297
5.93667	3.02015	8.12161	1.24311	1.21011		5.93667	0.701322	3.74894	0.476752	0.549317
5.94	3.02213	8.12243	1.24223	1.21049		5.94	0.701873	3.74998	0.477219	0.547282
5.94333	3.02385	8.12375	1.24745	1.21166		5.94333	0.702358	3.75339	0.480423	0.546776
5.94667	3.02611	8.12425	1.24659	1.208		5.94667	0.703101	3.75658	0.479973	0.544661
5.95	3.02799	8.12498	1.24549	1.20673		5.95	0.702755	3.76159	0.480898	0.546322
5.95333	3.03024	8.12705	1.24749	1.20718		5.95333	0.705805	3.7629	0.480399	0.545885
5.95667	3.03203	8.12843	1.24581	1.20704		5.95667	0.707997	3.76612	0.476979	0.546247
5.96	3.03418	8.12975	1.24042	1.2056		5.96	0.707687	3.768	0.475038	0.54602
5.96333	3.03636	8.13058	1.2401	1.2108		5.96333	0.709232	3.77101	0.474858	0.54586
5.96667	3.04014	8.12973	1.24356	1.20949		5.96667	0.710524	3.7719	0.471452	0.543737
5.97	3.04142	8.1306	1.24288	1.20868		5.97	0.711644	3.7739	0.469979	0.543033
5.97333	3.04536	8.1322	1.2436	1.20878		5.97333	0.710975	3.77761	0.471028	0.542958
5.97667	3.04808	8.13125	1.24567	1.21158		5.97667	0.712388	3.7811	0.469102	0.540996
5.98	3.05201	8.13228	1.24493	1.21094		5.98	0.713236	3.784	0.467942	0.540368
5.98333	3.05482	8.13539	1.24246	1.21222		5.98333	0.714969	3.78707	0.46755	0.542149
5.98667	3.05881	8.1344	1.23909	1.21318		5.98667	0.714896	3.79084	0.46832	0.542329
5.99	3.06181	8.1343	1.24379	1.21131		5.99	0.716279	3.79305	0.468506	0.542769
5.99333	3.0645	8.13777	1.24453	1.20874		5.99333	0.717471	3.79448	0.47151	0.543339
5.99667	3.06573	8.13792	1.23966	1.20798		5.99667	0.717933	3.79586	0.471456	0.544444
6	3.06722	8.1381	1.24537	1.21028		6	0.717391	3.79841	0.473681	0.544865
6.00333	3.06941	8.14082	1.24765	1.20957		6.00333	0.718718	3.8013	0.475219	0.544282
6.00667	3.07149	8.14368	1.24246	1.21024		6.00667	0.720569	3.80306	0.476012	0.544413
6.01	3.07312	8.14366	1.24094	1.20985		6.01	0.720274	3.80657	0.475421	0.544318
6.01333	3.07742	8.14585	1.24641	1.20724		6.01333	0.720763	3.8094	0.477226	0.544405
6.01667	3.0795	8.14797	1.24313	1.20455		6.01667	0.721664	3.81215	0.477043	0.54165
6.02	3.08049	8.14882	1.24409	1.20466		6.02	0.722307	3.81512	0.475242	0.542758
6.02333	3.08444	8.14965	1.24518	1.20758		6.02333	0.721897	3.81845	0.473901	0.541893
6.02667	3.08752	8.15124	1.24394	1.20715		6.02667	0.723825	3.82156	0.474365	0.540883
6.03	3.08918	8.15192	1.24146	1.20965		6.03	0.725347	3.82482	0.472763	0.540283
6.03333	3.09228	8.15137	1.23902	1.21059		6.03333	0.72762	3.8272	0.470462	0.541759
6.03667	3.09615	8.1532	1.23983	1.21087		6.03667	0.728857	3.82897	0.470753	0.539465
6.04	3.09734	8.15272	1.24142	1.21129		6.04	0.730406	3.83139	0.472025	0.541722
6.04333	3.10216	8.15273	1.24243	1.20956		6.04333	0.730399	3.83526	0.470691	0.54135
6.04667	3.10198	8.15272	1.24633	1.21003		6.04667	0.731777	3.83705	0.470611	0.542296
6.05	3.10468	8.1555	1.24815	1.20824		6.05	0.731671	3.83911	0.472175	0.541665
6.05333	3.10805	8.15411	1.2469	1.20927		6.05333	0.733498	3.84176	0.471592	0.54258
6.05667	3.11047	8.15583	1.24523	1.20636		6.05667	0.735356	3.84447	0.470261	0.539639
6.06	3.11265	8.15857	1.24462	1.20921		6.06	0.737721	3.84559	0.468791	0.53975
6.06333	3.11618	8.16082	1.24204	1.20788		6.06333	0.738285	3.84727	0.467034	0.538118
6.06667	3.11934	8.16103	1.24079	1.21177		6.06667	0.739847	3.84963	0.466098	0.53814
6.07	3.12052	8.16181	1.24017	1.20991		6.07	0.739148	3.85189	0.466023	0.536679
6.07333	3.12391	8.16283	1.2448	1.20992		6.07333	0.73868	3.85529	0.466058	0.537651
6.07667	3.126	8.16412	1.24593	1.21029		6.07667	0.73906	3.85843	0.467902	0.538151
6.08	3.13043	8.16469	1.24325	1.20981		6.08	0.739482	3.8634	0.470179	0.538566
6.08333	3.13082	8.1658	1.24269	1.20717		6.08333	0.741176	3.86725	0.470617	0.538018
6.08667	3.13485	8.16862	1.24498	1.21074		6.08667	0.742599	3.86891	0.471676	0.539171
6.09	3.13679	8.17018	1.23742	1.21049		6.09	0.74456	3.86961	0.472507	0.540091
6.09333	3.13873	8.17045	1.23669	1.21124		6.09333	0.745389	3.87254	0.471887	0.539695
6.09667	3.13945	8.17082	1.23828	1.21183		6.09667	0.74646	3.87328	0.471178	0.540433
6.1	3.14272	8.17209	1.24047	1.2134		6.1	0.746922	3.87581	0.473521	0.539577
6.10333	3.1438	8.17138	1.24098	1.21023		6.10333	0.747295	3.88033	0.473385	0.539455
6.10667	3.14669	8.17259	1.24489	1.21122		6.10667	0.748149	3.88276	0.473662	0.537825
6.11	3.14934	8.17214	1.2443	1.20859		6.11	0.749478	3.8856	0.473767	0.537503
6.11333	3.15171	8.1744	1.24663	1.20863		6.11333	0.749362	3.88854	0.473082	0.536311
6.11667	3.15519	8.17507	1.2458	1.20765		6.11667	0.748828	3.89053	0.469686	0.537763
6.12	3.15701	8.17643	1.24346	1.20954		6.12	0.75047	3.89274	0.468164	0.536102
6.12333	3.16045	8.17606	1.24114	1.20993		6.12333	0.750949	3.89595	0.465848	0.536306
6.12667	3.16384	8.17939	1.24037	1.21149		6.12667	0.751733	3.89736	0.463134	0.536861
6.13	3.16659	8.18067	1.23824	1.20924		6.13	0.754803	3.90037	0.463302	0.536505
6.13333	3.16905	8.18216	1.24014	1.20738		6.13333	0.757265	3.90252	0.464489	0.533666
6.13667	3.17257	8.18472	1.24125	1.20479		6.13667	0.758493	3.90466	0.465208	0.535318
6.14	3.17317	8.18666	1.24204	1.20385		6.14	0.759403	3.90699	0.464189	0.533826
6.14333	3.17525	8.18669	1.24188	1.20396		6.14333	0.760147	3.90961	0.465688	0.532896
6.14667	3.17816	8.18752	1.24231	1.20494		6.14667	0.759382	3.91264	0.464406	0.533452
6.15	3.18047	8.18775	1.24199	1.20699		6.15	0.760618	3.91565	0.465041	0.535399
6.15333	3.18254	8.18924	1.24361	1.20801		6.15333	0.760684	3.91753	0.464146	0.535646
6.15667	3.18573	8.18884	1.2449	1.20642		6.15667	0.76084	3.92047	0.465744	0.536314
6.16	3.18894	8.19075	1.24622	1.207		6.16	0.761069	3.9233	0.467284	0.537139
6.16333	3.19141	8.19044	1.24988	1.20739		6.16333	0.763255	3.92365	0.468795	0.537966
6.16667	3.1933	8.19159	1.24583	1.20845		6.16667	0.762844	3.926	0.468105	0.537874
6.17	3.19691	8.19168	1.24591	1.20845		6.17	0.763743	3.9292	0.469578	0.536606
6.17333	3.19863	8.19401	1.24146	1.21063		6.17333	0.766414	3.93276	0.471049	0.536906
6.17667	3.20051	8.19474	1.24382	1.20825		6.17667	0.768291	3.93485	0.470921	0.536129
6.18	3.20302	8.19715	1.24035	1.2082		6.18	0.769612	3.93847	0.470352	0.534507
6.18333	3.20603	8.1996	1.2462	1.20588		6.18333	0.770887	3.94197	0.470734	0.534693
6.18667	3.20757	8.20094	1.24517	1.20612		6.18667	0.77229	3.94482	0.470163	0.535729
6.19	3.21075	8.2009	1.2479	1.20673		6.19	0.771868	3.94578	0.468489	0.53576
6.19333	3.21285	8.2035	1.24504	1.20785		6.19333	0.772978	3.94873	0.467637	0.535678
6.19667	3.21503	8.20464	1.24717	1.20595		6.19667	0.773601	3.95079	0.467252	0.535799
6.2	3.21639	8.20455	1.24201	1.20611		6.2	0.775354	3.95319	0.464742	0.535179
6.20333	3.21882	8.20453	1.23782	1.20624		6.20333	0.77587	3.95572	0.46331	0.533559
6.20667	3.22183	8.20502	1.23797	1.20591		6.20667	0.777247	3.95844	0.462687	0.533961
6.21	3.22474	8.20483	1.24213	1.20517		6.21	0.777234	3.96188	0.46065	0.531551
6.21333	3.22834	8.2054	1.23912	1.20785		6.21333	0.778153	3.96671	0.458827	0.532392
6.21667	3.23182	8.20643	1.24024	1.20765		6.21667	0.777875	3.96939	0.459134	0.53254
6.22	3.23544	8.20747	1.24471	1.20714		6.22	0.779312	3.97185	0.458451	0.532984
6.22333	3.23753	8.20947	1.24563	1.20606		6.22333	0.779406	3.97589	0.458456	0.532821
6.22667	3.24094	8.21039	1.24224	1.2074		6.22667	0.781251	3.97775	0.458966	0.533889
6.23	3.24236	8.21168	1.24283	1.20643		6.23	0.781893	3.97942	0.460384	0.532623
6.23333	3.24598	8.21066	1.24431	1.20726		6.23333	0.783173	3.98243	0.461568	0.533474
6.23667	3.24624	8.21202	1.24208	1.20619		6.23667	0.782872	3.98486	0.462702	0.53216
6.24	3.24818	8.21294	1.24357	1.20501		6.24	0.784291	3.98646	0.462783	0.53131
6.24333	3.25036	8.21372	1.24194	1.20394		6.24333	0.785208	3.98859	0.464869	0.53094
6.24667	3.25368	8.21526	1.24362	1.20465		6.24667	0.78475	3.98975	0.467659	0.531078
6.25	3.25515	8.2184	1.24199	1.20399		6.25	0.785807	3.99164	0.467589	0.528142
6.25333	3.25907	8.22007	1.24554	1.2047		6.25333	0.787512	3.99386	0.469725	0.531759
6.25667	3.26146	8.22158	1.2421	1.20672		6.25667	0.788876	3.99613	0.470995	0.530655
6.26	3.26404	8.22143	1.24449	1.20529		6.26	0.788442	3.99751	0.468851	0.531742
6.26333	3.2666	8.21998	1.24344	1.20487		6.26333	0.790593	4.00092	0.467249	0.530852
6.26667	3.26959	8.22041	1.24063	1.20449		6.26667	0.791553	4.00178	0.468004	0.532872
6.27	3.27145	8.22126	1.23915	1.20291		6.27	0.792126	4.00629	0.464738	0.528935
6.27333	3.2738	8.2217	1.2382	1.20228		6.27333	0.792086	4.00747	0.464254	0.529498
6.27667	3.2772	8.22407	1.24066	1.20373		6.27667	0.793711	4.01157	0.465311	0.529742
6.28	3.27907	8.22598	1.2391	1.20508		6.28	0.795082	4.01429	0.464212	0.529763
6.28333	3.27913	8.22688	1.23929	1.20552		6.28333	0.796674	4.01776	0.462372	0.528662
6.28667	3.27988	8.22829	1.23915	1.20531		6.28667	0.797701	4.01848	0.463187	0.529891
6.29	3.28215	8.22814	1.2423	1.20447		6.29	0.799331	4.02242	0.461169	0.52918
6.29333	3.28454	8.23055	1.23805	1.20495		6.29333	0.79967	4.02438	0.458088	0.527607
6.29667	3.28749	8.23242	1.24131	1.20304		6.29667	0.80047	4.02802	0.458478	0.529125
6.3	3.29097	8.23344	1.24229	1.20297		6.3	0.800541	4.03075	0.458661	0.528414
6.30333	3.29407	8.23489	1.24356	1.20379		6.30333	0.800872	4.03216	0.457325	0.527465
6.30667	3.29697	8.23695	1.23997	1.20423		6.30667	0.80153	4.03433	0.457667	0.526787
6.31	3.2977	8.23749	1.23954	1.2039		6.31	0.802328	4.03716	0.460714	0.528267
6.31333	3.3005	8.23815	1.23853	1.20434		6.31333	0.803248	4.03922	0.459027	0.526119
6.31667	3.30272	8.24031	1.2414	1.20451		6.31667	0.80382	4.04161	0.460382	0.525459
6.32	3.30556	8.23946	1.23882	1.20659		6.32	0.805884	4.04573	0.462068	0.525386
6.32333	3.30667	8.24118	1.24019	1.20572		6.32333	0.808972	4.0486	0.462451	0.526143
6.32667	3.30986	8.24166	1.2426	1.20726		6.32667	0.811013	4.05125	0.463214	0.524575
6.33	3.31046	8.24179	1.24243	1.20646		6.33	0.811062	4.05341	0.464902	0.525041
6.33333	3.31116	8.24225	1.24248	1.2057		6.33333	0.812281	4.05582	0.465114	0.525992
6.33667	3.31326	8.24451	1.24331	1.2047		6.33667	0.812532	4.05863	0.465081	0.526738
6.34	3.31461	8.24407	1.24415	1.20364		6.34	0.81145	4.05906	0.467282	0.526876
6.34333	3.31678	8.24425	1.23831	1.20037		6.34333	0.812084	4.06148	0.465827	0.52626
6.34667	3.31963	8.24663	1.23992	1.19955		6.34667	0.813691	4.0632	0.465694	0.526556
6.35	3.32212	8.2461	1.24248	1.20163		6.35	0.814277	4.06534	0.465066	0.527234
6.35333	3.32521	8.24594	1.2359	1.2011		6.35333	0.816726	4.06649	0.465639	0.527348
6.35667	3.32953	8.24939	1.23829	1.20297		6.35667	0.81656	4.071	0.463809	0.527785
6.36	3.33228	8.24939	1.24479	1.20478		6.36	0.819063	4.07275	0.463435	0.527933
6.36333	3.3355	8.24974	1.2421	1.20314		6.36333	0.818712	4.07396	0.461094	0.52792
6.36667	3.34038	8.2519	1.23892	1.20167		6.36667	0.81815	4.07655	0.460837	0.526476
6.37	3.34224	8.25363	1.24227	1.20058		6.37	0.817079	4.07857	0.458514	0.527973
6.37333	3.34412	8.25272	1.23916	1.20079		6.37333	0.819896	4.08027	0.456391	0.526242
6.37667	3.34639	8.25684	1.23692	1.20012		6.37667	0.81939	4.08381	0.45521	0.528173
6.38	3.34732	8.25706	1.23616	1.20372		6.38	0.82145	4.08702	0.456492	0.526646
6.38333	3.348	8.2591	1.23665	1.20251		6.38333	0.825056	4.09007	0.455612	0.527784
6.38667	3.34939	8.2594	1.23866	1.20362		6.38667	0.827561	4.09323	0.455221	0.525903
6.39	3.35028	8.26047	1.2399	1.20503		6.39	0.827271	4.09527	0.457031	0.526839
6.39333	3.35173	8.26048	1.23909	1.20511		6.39333	0.827088	4.09531	0.457793	0.524268
6.39667	3.35326	8.26146	1.24027	1.20454		6.39667	0.827342	4.09822	0.457957	0.525984
6.4	3.3554	8.26064	1.23651	1.20393		6.4	0.826369	4.09874	0.45793	0.524675
6.40333	3.35743	8.2619	1.23582	1.20248		6.40333	0.826764	4.10063	0.459778	0.525834
6.40667	3.36096	8.26245	1.2357	1.20023		6.40667	0.829175	4.10244	0.460004	0.525479
6.41	3.36415	8.26266	1.23843	1.20046		6.41	0.829822	4.1067	0.461396	0.528033
6.41333	3.36601	8.26358	1.23986	1.20043		6.41333	0.831511	4.10783	0.461412	0.525106
6.41667	3.36808	8.2657	1.24254	1.20015		6.41667	0.833233	4.11161	0.462094	0.525001
6.42	3.37202	8.26693	1.24394	1.20093		6.42	0.834883	4.11372	0.459583	0.523403
6.42333	3.37482	8.26807	1.24321	1.20042		6.42333	0.834664	4.11645	0.458807	0.522439
6.42667	3.37872	8.26933	1.24065	1.19999		6.42667	0.837138	4.12034	0.457793	0.520575
6.43	3.38197	8.27134	1.24069	1.19995		6.43	0.836473	4.12314	0.456288	0.521951
6.43333	3.38557	8.27193	1.23886	1.20058		6.43333	0.83721	4.12464	0.455818	0.521366
6.43667	3.38779	8.27173	1.23543	1.20023		6.43667	0.836496	4.12763	0.456927	0.519936
6.44	3.39027	8.27199	1.23921	1.20137		6.44	0.837817	4.12958	0.455483	0.520165
6.44333	3.39266	8.27393	1.23918	1.20245		6.44333	0.838037	4.13123	0.455102	0.519956
6.44667	3.39542	8.27512	1.23412	1.20246		6.44667	0.840303	4.13379	0.455626	0.520044
6.45	3.39769	8.27567	1.23827	1.20265		6.45	0.840782	4.1366	0.455874	0.51997
6.45333	3.40008	8.27628	1.24306	1.20394		6.45333	0.843001	4.13893	0.457502	0.521219
6.45667	3.40094	8.27696	1.23833	1.20315		6.45667	0.844654	4.1415	0.46032	0.52055
6.46	3.40276	8.27693	1.23848	1.20207		6.46	0.84658	4.14015	0.461087	0.521158
6.46333	3.40594	8.27668	1.2414	1.20032		6.46333	0.84814	4.14321	0.462164	0.521545
6.46667	3.4074	8.27771	1.23766	1.20091		6.46667	0.84975	4.14553	0.461478	0.522001
6.47	3.40869	8.2802	1.2372	1.19843		6.47	0.84957	4.14696	0.458985	0.52112
6.47333	3.41199	8.28363	1.23838	1.19879		6.47333	0.850682	4.15093	0.456994	0.521798
6.47667	3.41437	8.28465	1.24015	1.19819		6.47667	0.851175	4.1542	0.455574	0.519308
6.48	3.41612	8.28558	1.24092	1.19835		6.48	0.8517	4.15459	0.452748	0.518081
6.48333	3.4189	8.28752	1.24297	1.19853		6.48333	0.853023	4.15763	0.452657	0.518564
6.48667	3.42196	8.28862	1.24116	1.20076		6.48667	0.853349	4.16172	0.454348	0.520202
6.49	3.42396	8.2891	1.24128	1.20123		6.49	0.852359	4.16294	0.454653	0.5193
6.49333	3.42651	8.28857	1.2383	1.19982		6.49333	0.852323	4.1663	0.456497	0.521005
6.49667	3.42904	8.29108	1.23734	1.20009		6.49667	0.85245	4.16865	0.458697	0.520076
6.5	3.4305	8.29008	1.23501	1.20089		6.5	0.853695	4.16954	0.45822	0.519683
6.50333	3.43177	8.29095	1.23805	1.19878		6.50333	0.85607	4.17085	0.457301	0.517336
6.50667	3.43478	8.29212	1.23674	1.19762		6.50667	0.857116	4.17274	0.456753	0.518745
6.51	3.43804	8.29469	1.23878	1.19798		6.51	0.858572	4.17606	0.454725	0.517706
6.51333	3.43905	8.29409	1.23985	1.19927		6.51333	0.859295	4.17884	0.452875	0.52035
6.51667	3.44117	8.29603	1.23932	1.19767		6.51667	0.859421	4.18074	0.451948	0.520276
6.52	3.44381	8.29708	1.23941	1.19938		6.52	0.858232	4.18276	0.451259	0.52145
6.52333	3.44444	8.29822	1.23703	1.19859		6.52333	0.858949	4.18517	0.451989	0.521615
6.52667	3.44721	8.29894	1.24059	1.19958		6.52667	0.860172	4.18622	0.454711	0.521925
6.53	3.45036	8.29997	1.24343	1.19906		6.53	0.862308	4.18756	0.4573	0.519444
6.53333	3.45391	8.30046	1.24357	1.1996		6.53333	0.864291	4.19013	0.457165	0.517704
6.53667	3.45467	8.3007	1.23671	1.19714		6.53667	0.866886	4.1925	0.45616	0.518967
6.54	3.45754	8.29948	1.23986	1.19947		6.54	0.868676	4.19395	0.455095	0.518
6.54333	3.45948	8.29993	1.23724	1.19869		6.54333	0.868612	4.19483	0.450255	0.517498
6.54667	3.46166	8.29966	1.23319	1.19726		6.54667	0.868735	4.19782	0.44836	0.517905
6.55	3.46335	8.30253	1.23409	1.19832		6.55	0.868544	4.19869	0.448834	0.519888
6.55333	3.46723	8.30346	1.23812	1.19996		6.55333	0.869859	4.20207	0.450278	0.518241
6.55667	3.46902	8.30467	1.23962	1.19874		6.55667	0.870047	4.20435	0.451794	0.517498
6.56	3.47057	8.30636	1.23851	1.19881		6.56	0.871192	4.20757	0.453801	0.516212
6.56333	3.47107	8.30975	1.24201	1.19981		6.56333	0.872654	4.20951	0.454156	0.517892
6.56667	3.47265	8.30846	1.24032	1.19693		6.56667	0.87359	4.21414	0.454393	0.515695
6.57	3.47533	8.30972	1.24054	1.19779		6.57	0.873245	4.21574	0.452798	0.514101
6.57333	3.47591	8.31119	1.23969	1.19526		6.57333	0.874566	4.21819	0.450683	0.514726
6.57667	3.47786	8.31221	1.23997	1.19799		6.57667	0.875752	4.22218	0.449616	0.51428
6.58	3.48005	8.31122	1.23198	1.19886		6.58	0.87589	4.22557	0.450446	0.514002
6.58333	3.48366	8.31297	1.237	1.19987		6.58333	0.876923	4.22705	0.450836	0.515544
6.58667	3.48618	8.31272	1.23928	1.19859		6.58667	0.878739	4.2284	0.453757	0.517392
6.59	3.49117	8.31469	1.23788	1.19842		6.59	0.879345	4.23108	0.456151	0.517207
6.59333	3.49363	8.31635	1.2374	1.19784		6.59333	0.879208	4.23194	0.455566	0.519945
6.59667	3.49726	8.31962	1.24572	1.19785		6.59667	0.879708	4.23204	0.454311	0.517345
6.6	3.4984	8.32066	1.24285	1.19895		6.6	0.881332	4.23335	0.453696	0.517245
6.60333	3.49866	8.32294	1.24195	1.19784		6.60333	0.882676	4.23521	0.45113	0.515239
6.60667	3.49959	8.32252	1.24012	1.20138		6.60667	0.883851	4.23744	0.448439	0.51596
6.61	3.50313	8.32077	1.23852	1.19893		6.61	0.886679	4.24003	0.451936	0.514104
6.61333	3.50448	8.32005	1.23649	1.19856		6.61333	0.889193	4.24308	0.453035	0.513459
6.61667	3.50595	8.31995	1.23709	1.19576		6.61667	0.889088	4.24638	0.454252	0.513722
6.62	3.50858	8.32094	1.23629	1.19878		6.62	0.889172	4.24816	0.454127	0.514116
6.62333	3.51096	8.32234	1.2369	1.19819		6.62333	0.888946	4.24919	0.454299	0.512914
6.62667	3.51092	8.32507	1.23982	1.19969		6.62667	0.889742	4.25248	0.449956	0.512367
6.63	3.51283	8.32578	1.23843	1.19783		6.63	0.890332	4.25416	0.449293	0.513854
6.63333	3.51539	8.32638	1.23841	1.20123		6.63333	0.890886	4.25506	0.446775	0.512078
6.63667	3.51769	8.32536	1.23581	1.20012		6.63667	0.891489	4.25989	0.447339	0.513683
6.64	3.52019	8.32626	1.23501	1.19896		6.64	0.89393	4.26243	0.448996	0.512642
6.64333	3.52501	8.3288	1.2341	1.19786		6.64333	0.894077	4.2619	0.451234	0.512596
6.64667	3.52641	8.33032	1.23317	1.19992		6.64667	0.894395	4.26606	0.449729	0.512598
6.65	3.52909	8.33252	1.23383	1.19633		6.65	0.89503	4.26802	0.450976	0.513048
6.65333	3.53104	8.33709	1.23491	1.19683		6.65333	0.895779	4.26796	0.449752	0.512456
6.65667	3.53337	8.33604	1.23483	1.19458		6.65667	0.895624	4.27126	0.447017	0.512802
[truncated: 7,152 more rows]
