# Supplementary material for: Early steps of protein disaggregation by Hsp70 chaperone and class B J-domain proteins are shaped by Hsp110
Source: eLife. 2024 Oct 15;13:RP94795. doi: 10.7554/eLife.94795 (PMC11479587; doi:10.7554/eLife.94795)
Supplement: Figure 1—figure supplement 1—source data 6. [file elife-94795-fig1-figsupp1-data6.xlsx]

## Sheet: Figure 1—figure supplement 1F
	replicate 1						replicate 2
Time (min)	Sis1, Ssa1	Sis1, Ssa1, Sse1	Sdj1, Ssa1	Sdj1, Ssa1, Sse1				Sis1, Ssa1	Sis1, Ssa1, Sse1	Sdj1, Ssa1	Sdj1, Ssa1, Sse1
0	0	0	0	0			0	0	0	0	0
0.00333333	0.00181477	-0.00597124	-0.00210282	-0.00374839			0.00333333	-0.0021712	-0.00496641	-0.00368797	-0.00333009
0.00666667	-0.00506849	-0.00245158	-0.00415006	-0.0014172			0.00666667	-0.00214863	-0.0111448	-0.00484308	-0.00917819
0.01	-0.00558594	-0.0055553	-0.00530709	-0.00236793			0.01	-0.00510511	-0.0104659	-0.00984823	-0.00827007
0.0133333	-0.00624935	-0.00327901	-0.00761817	-0.00284657			0.0133333	-0.00107061	-0.0131856	-0.00838047	-0.0074817
0.0166667	-0.00728764	-0.00418702	-0.00898093	-0.00216035			0.0166667	-0.00774198	-0.015218	-0.0130599	-0.00532729
0.02	-0.00787868	-0.00525499	-0.00971372	-0.000768087			0.02	-0.00441867	-0.0122492	-0.00997593	-0.00705832
0.0233333	-0.00614442	-0.0111132	-0.00807752	-0.000432894			0.0233333	-0.00873253	-0.0177968	-0.0119899	-0.00489813
0.0266667	-0.00659644	-0.0129376	-0.00942835	0.000782402			0.0266667	-0.00703713	-0.0124986	-0.0125582	-0.00626107
0.03	-0.00760976	-0.0153232	-0.0101973	0.0014041			0.03	-0.0122113	-0.0156758	-0.0135864	-0.00160579
0.0333333	-0.00811829	-0.0174301	-0.0100955	0.00176926			0.0333333	-0.0116236	-0.0187108	-0.0119482	0.00206108
0.0366667	-0.0105024	-0.0186282	-0.0093251	0.0010908			0.0366667	-0.0126794	-0.0201246	-0.0137106	-0.00761569
0.04	-0.0112459	-0.0156089	-0.012063	-0.000273451			0.04	-0.00603761	-0.0151273	-0.0215548	-0.00508317
0.0433333	-0.0138795	-0.01229	-0.0112124	-0.00193517			0.0433333	-0.0116016	-0.0174279	-0.0142012	-0.00421076
0.0466667	-0.013457	-0.0118291	-0.0071216	-0.000939825			0.0466667	-0.0144026	-0.0131616	-0.0185941	-0.00848073
0.05	-0.0137482	-0.0107714	-0.0061324	-0.00127741			0.05	-0.00745327	-0.0139016	-0.0206246	-0.00264167
0.0533333	-0.0159709	-0.0114464	-0.00733946	-0.00169205			0.0533333	-0.0119847	-0.020858	-0.0171347	-0.00770803
0.0566667	-0.0160092	-0.0143376	-0.0059499	-2.53064e-05			0.0566667	-0.0128943	-0.0186841	-0.0209452	-0.00498208
0.06	-0.0122665	-0.0205949	-0.00425682	0.0028916			0.06	-0.0105272	-0.0130624	-0.0144526	-0.0135549
0.0633333	-0.0169549	-0.0278495	-0.00651533	0.00261811			0.0633333	-0.0150789	-0.0163544	-0.0197869	-0.00760572
0.0666667	-0.0182967	-0.0305414	-0.0090335	0.0016137			0.0666667	-0.0191134	-0.0160278	-0.0223382	-0.00873643
0.07	-0.0174875	-0.0270031	-0.0078182	0.00223472			0.07	-0.015631	-0.0155831	-0.0136129	-0.00955956
0.0733333	-0.019003	-0.03204	-0.00714614	0.00089108			0.0733333	-0.010953	-0.0155732	-0.0212849	-0.0138155
0.0766667	-0.0201393	-0.0295348	-0.0102764	-0.002598			0.0766667	-0.0179326	-0.0150069	-0.0151911	-0.0151585
0.08	-0.016696	-0.0241459	-0.0118759	-0.00482904			0.08	-0.0118117	-0.0157843	-0.0171136	-0.0087158
0.0833333	-0.0164554	-0.0290053	-0.00846592	-0.00497793			0.0833333	-0.00641358	-0.0162032	-0.0125273	-0.00839032
0.0866667	-0.0155752	-0.0296051	-0.00867841	-0.00701953			0.0866667	-0.0157084	-0.0156951	-0.0217869	-0.0139521
0.09	-0.0173732	-0.0333495	-0.00990298	-0.00619247			0.09	-0.017516	-0.0163458	-0.0217501	-0.0119466
0.0933333	-0.0223882	-0.0279318	-0.0088324	-0.00370695			0.0933333	-0.0212706	-0.0203346	-0.0172649	-0.0154521
0.0966667	-0.0219473	-0.0399888	-0.00573701	-0.00110727			0.0966667	-0.020189	-0.025131	-0.0239494	-0.0110639
0.1	-0.0241134	-0.0352743	-0.00778369	0.000507773			0.1	-0.0122812	-0.015489	-0.0183914	-0.0163287
0.103333	-0.0252945	-0.0408372	-0.00747209	0.00208259			0.103333	-0.0147415	-0.0178232	-0.0229945	-0.0126594
0.106667	-0.0240434	-0.036334	-0.00812611	0.00165867			0.106667	-0.0123909	-0.021559	-0.020367	-0.0188617
0.11	-0.0211153	-0.0484318	-0.00831588	0.00189396			0.11	-0.0155925	-0.0229659	-0.0205036	-0.0145608
0.113333	-0.0243112	-0.0408833	-0.00851703	0.00169423			0.113333	-0.0117425	-0.0208498	-0.0200522	-0.0203115
0.116667	-0.0236027	-0.0441143	-0.00621103	-0.00263143			0.116667	-0.0188379	-0.0221364	-0.0202952	-0.0171784
0.12	-0.0237925	-0.0504215	-0.0064714	-0.00252456			0.12	-0.0161627	-0.0233257	-0.0233879	-0.0178492
0.123333	-0.0265432	-0.0467267	-0.00577225	-0.000973927			0.123333	-0.0125404	-0.0210547	-0.0226475	-0.0143518
0.126667	-0.0294985	-0.0402688	-0.00379232	-0.00274331			0.126667	-0.0174276	-0.0220387	-0.0195937	-0.0165648
0.13	-0.0284719	-0.0419399	-0.00398753	-0.00449905			0.13	-0.0117858	-0.0230644	-0.018047	-0.0199771
0.133333	-0.0280102	-0.044647	-0.00393391	-0.00122381			0.133333	-0.0205104	-0.0221778	-0.0173095	-0.0198124
0.136667	-0.0276719	-0.0363353	-0.00241701	-9.0215e-05			0.136667	-0.018363	-0.0217784	-0.0186677	-0.0201144
0.14	-0.0242462	-0.0399427	-0.000781761	-0.00232389			0.14	-0.0171428	-0.0235279	-0.024649	-0.0240229
0.143333	-0.0219255	-0.0395822	0.000711875	-0.000230453			0.143333	-0.0118773	-0.0218725	-0.0213537	-0.0236616
0.146667	-0.021889	-0.0365092	0.00241329	-0.00196993			0.146667	-0.015786	-0.0226881	-0.0254784	-0.0234677
0.15	-0.021711	-0.0334286	0.00277784	-0.00503516			0.15	-0.0181708	-0.0172706	-0.0270044	-0.0173141
0.153333	-0.022727	-0.0377924	0.00194938	-0.00430139			0.153333	-0.0213872	-0.0255992	-0.0241561	-0.026256
0.156667	-0.0251144	-0.0368528	0.00054081	-0.00544329			0.156667	-0.0185073	-0.0228247	-0.0258697	-0.0146621
0.16	-0.0242777	-0.0369469	-1.50714e-05	-0.00744572			0.16	-0.0189335	-0.0206418	-0.023488	-0.0188915
0.163333	-0.0249508	-0.0367259	-0.00253605	-0.00643895			0.163333	-0.0201844	-0.025273	-0.0231653	-0.0221944
0.166667	-0.0257562	-0.035451	-0.00418175	-0.00568155			0.166667	-0.0184752	-0.0231122	-0.0236369	-0.0200126
0.17	-0.026822	-0.0344559	-0.00352593	-0.0104081			0.17	-0.0239099	-0.0212694	-0.0231619	-0.0229807
0.173333	-0.0249208	-0.0334694	-0.00263576	-0.0129097			0.173333	-0.0190062	-0.0213608	-0.0253817	-0.0191788
0.176667	-0.0268793	-0.038657	-0.00375021	-0.0162244			0.176667	-0.0177224	-0.0265259	-0.0278958	-0.0181168
0.18	-0.0288927	-0.0427124	-0.00139357	-0.0176299			0.18	-0.0171871	-0.0212057	-0.0260518	-0.0192767
0.183333	-0.0307991	-0.0436114	0.00173802	-0.0182161			0.183333	-0.0189312	-0.0257466	-0.0262533	-0.0225163
0.186667	-0.0292518	-0.0424362	0.000257449	-0.017812			0.186667	-0.0180341	-0.0294286	-0.0278943	-0.0296155
0.19	-0.0312275	-0.0449203	0.00177596	-0.018482			0.19	-0.0234908	-0.0270214	-0.023828	-0.0271029
0.193333	-0.0341297	-0.0473299	0.00286622	-0.0162414			0.193333	-0.0159353	-0.0261215	-0.026812	-0.0267079
0.196667	-0.0342018	-0.0448934	0.000580097	-0.0164634			0.196667	-0.0238895	-0.0252572	-0.0253339	-0.0245615
0.2	-0.0324725	-0.0442625	-0.0012972	-0.0162768			0.2	-0.019773	-0.0249395	-0.0260487	-0.0252481
0.203333	-0.032046	-0.0477797	-0.000284008	-0.0140389			0.203333	-0.0155425	-0.0228452	-0.0225609	-0.0289589
0.206667	-0.035001	-0.0497562	-0.00155488	-0.0128169			0.206667	-0.0196886	-0.0284247	-0.0239735	-0.0243515
0.21	-0.0331571	-0.0460358	-0.0018021	-0.0125374			0.21	-0.0173739	-0.0300696	-0.0285208	-0.0225767
0.213333	-0.0316582	-0.049756	-0.00108399	-0.0109028			0.213333	-0.0194327	-0.0277043	-0.0264184	-0.0238905
0.216667	-0.0319625	-0.0495176	-0.00137966	-0.0100162			0.216667	-0.0178324	-0.0224917	-0.0292489	-0.0306369
0.22	-0.0334045	-0.0466024	-0.00183433	-0.0145116			0.22	-0.0170075	-0.0246068	-0.0256421	-0.0262489
0.223333	-0.0312219	-0.0452873	-0.000376564	-0.0133203			0.223333	-0.0149687	-0.0278738	-0.0307665	-0.0291893
0.226667	-0.0326613	-0.0480799	-0.00171954	-0.0130023			0.226667	-0.0212689	-0.0310993	-0.0246403	-0.0262764
0.23	-0.0357639	-0.0451746	-0.00150049	-0.0156094			0.23	-0.0221472	-0.0232034	-0.0242992	-0.0276053
0.233333	-0.0372821	-0.0514266	-0.00191383	-0.0189019			0.233333	-0.0178668	-0.0274572	-0.0265114	-0.0277859
0.236667	-0.0372318	-0.0496893	-0.00330767	-0.0202036			0.236667	-0.0192832	-0.0250996	-0.0358092	-0.0261768
0.24	-0.0372804	-0.0474345	-0.00654653	-0.0220571			0.24	-0.0163829	-0.0301909	-0.0326372	-0.0281787
0.243333	-0.0366329	-0.042219	-0.00508425	-0.023828			0.243333	-0.0213678	-0.0297913	-0.0271638	-0.0326733
0.246667	-0.0341444	-0.0423569	-0.0058	-0.0234964			0.246667	-0.0197898	-0.0328926	-0.030721	-0.0236902
0.25	-0.0348413	-0.0393098	-0.00757187	-0.0212438			0.25	-0.0247409	-0.034065	-0.0307753	-0.0294832
0.253333	-0.0368399	-0.0416187	-0.00686198	-0.0172033			0.253333	-0.0212057	-0.0292308	-0.0267579	-0.0279286
0.256667	-0.036992	-0.0431486	-0.00612021	-0.0156573			0.256667	-0.0217501	-0.0287733	-0.027991	-0.028296
0.26	-0.0371137	-0.0456904	-0.00785036	-0.0173537			0.26	-0.0201743	-0.0292682	-0.0257394	-0.0273334
0.263333	-0.0377636	-0.0467463	-0.00794332	-0.0171289			0.263333	-0.0161943	-0.0320444	-0.0309869	-0.0259941
0.266667	-0.0387016	-0.0480949	-0.00732294	-0.0197166			0.266667	-0.0219518	-0.0291535	-0.0306344	-0.0312756
0.27	-0.0376826	-0.04805	-0.00520474	-0.0190171			0.27	-0.0256824	-0.0260337	-0.027763	-0.0318985
0.273333	-0.0373071	-0.0482717	-0.00372615	-0.0195057			0.273333	-0.0238516	-0.0309541	-0.0244847	-0.0343536
0.276667	-0.038877	-0.0505884	-0.0049676	-0.017244			0.276667	-0.0205606	-0.0310647	-0.0245799	-0.0347777
0.28	-0.0391613	-0.0534962	-0.00644152	-0.0187699			0.28	-0.0230421	-0.0269014	-0.0347973	-0.0321755
0.283333	-0.0413164	-0.054405	-0.00649278	-0.0179645			0.283333	-0.0255322	-0.025803	-0.0305354	-0.0300179
0.286667	-0.0418553	-0.055914	-0.00771742	-0.0228331			0.286667	-0.0208056	-0.0323302	-0.0315951	-0.035779
0.29	-0.043278	-0.0567348	-0.0114602	-0.0268104			0.29	-0.0198765	-0.0320213	-0.0351174	-0.0304105
0.293333	-0.0433409	-0.0540969	-0.0103618	-0.0273455			0.293333	-0.0188008	-0.0337453	-0.0337034	-0.0306159
0.296667	-0.0446648	-0.0510636	-0.00984735	-0.0288083			0.296667	-0.0270862	-0.0302638	-0.0361136	-0.0325183
0.3	-0.0426478	-0.0463937	-0.00885005	-0.0277156			0.3	-0.0229105	-0.0279794	-0.0352999	-0.030032
0.303333	-0.0434523	-0.0475333	-0.00945344	-0.025198			0.303333	-0.0216172	-0.0324015	-0.0403589	-0.0353487
0.306667	-0.0443591	-0.0472821	-0.00599404	-0.0223751			0.306667	-0.0231236	-0.0305004	-0.03127	-0.0352
0.31	-0.0445795	-0.0477197	-0.00562214	-0.0255427			0.31	-0.0237263	-0.035086	-0.0321487	-0.0358215
0.313333	-0.045749	-0.0492995	-0.00449992	-0.0237892			0.313333	-0.0195976	-0.0334843	-0.0316904	-0.0341747
0.316667	-0.0437406	-0.0508325	-0.00349973	-0.0258581			0.316667	-0.0292495	-0.0337244	-0.0303587	-0.0262163
0.32	-0.0427567	-0.0504284	-0.00313028	-0.0264541			0.32	-0.0244118	-0.0288104	-0.0360197	-0.042224
0.323333	-0.0421676	-0.0529734	-0.00368912	-0.0270526			0.323333	-0.0270364	-0.0323682	-0.0337321	-0.0332461
0.326667	-0.0435506	-0.0558368	-0.000986546	-0.026717			0.326667	-0.0245041	-0.0338927	-0.0374267	-0.035653
0.33	-0.0410164	-0.0546139	-0.00146423	-0.0245184			0.33	-0.0264575	-0.0350654	-0.0365519	-0.0379326
0.333333	-0.0423181	-0.0577144	-0.00397748	-0.0230787			0.333333	-0.0285998	-0.0366414	-0.0339115	-0.0365486
0.336667	-0.0430746	-0.061311	-0.00332957	-0.0246073			0.336667	-0.0234519	-0.0342054	-0.0338464	-0.0385458
0.34	-0.0431494	-0.0598693	-0.00410081	-0.0264328			0.34	-0.0278551	-0.0300312	-0.0317361	-0.0286345
0.343333	-0.042873	-0.0571179	-0.00663231	-0.0287475			0.343333	-0.0291161	-0.0350795	-0.0378532	-0.0359459
0.346667	-0.0442353	-0.0585738	-0.00574262	-0.0310871			0.346667	-0.0282252	-0.0296371	-0.0321739	-0.0380573
0.35	-0.0474009	-0.0560779	-0.00322656	-0.0326144			0.35	-0.0255919	-0.033597	-0.0309755	-0.0317875
0.353333	-0.0494989	-0.0548498	-0.00378024	-0.033807			0.353333	-0.0335725	-0.0348194	-0.0402113	-0.0406832
0.356667	-0.0491765	-0.0555109	-0.00417336	-0.0344305			0.356667	-0.0303077	-0.030572	-0.0354202	-0.0398085
0.36	-0.0512532	-0.0583463	-0.00370727	-0.032081			0.36	-0.022441	-0.0389621	-0.0389537	-0.0367279
0.363333	-0.0531486	-0.0561604	-0.0044059	-0.0342236			0.363333	-0.0286845	-0.0336871	-0.0354861	-0.0394564
0.366667	-0.0520028	-0.0592825	-0.00363301	-0.0347604			0.366667	-0.0229415	-0.0326068	-0.0352368	-0.0387542
0.37	-0.0505331	-0.0577049	-0.00301268	-0.0346385			0.37	-0.0262578	-0.0406914	-0.0334072	-0.0338391
0.373333	-0.0516536	-0.0596515	-0.00377834	-0.0322199			0.373333	-0.0258966	-0.029216	-0.0376138	-0.0368416
0.376667	-0.0532825	-0.0600524	-0.00520538	-0.0334085			0.376667	-0.0281414	-0.033178	-0.0328285	-0.0378088
0.38	-0.0516702	-0.0634826	-0.00412118	-0.0342326			0.38	-0.0233619	-0.0326026	-0.0363557	-0.0455108
0.383333	-0.0507264	-0.0637499	-0.00532149	-0.0340897			0.383333	-0.0230485	-0.0372136	-0.0350896	-0.0416224
0.386667	-0.0526355	-0.0683695	-0.00512911	-0.0319875			0.386667	-0.0300788	-0.0368698	-0.040908	-0.0401191
0.39	-0.0538335	-0.0667021	-0.00581022	-0.0342633			0.39	-0.0330195	-0.0379081	-0.0398422	-0.0483053
0.393333	-0.0496379	-0.0641918	-0.00443574	-0.0374132			0.393333	-0.0250378	-0.0349524	-0.0402942	-0.0433253
0.396667	-0.0513245	-0.0594591	-0.00486781	-0.036273			0.396667	-0.0280969	-0.0368653	-0.0403659	-0.0406086
0.4	-0.0533921	-0.0614056	-0.00580534	-0.0375871			0.4	-0.0277824	-0.0366184	-0.0385278	-0.040643
0.403333	-0.0536572	-0.0555118	-0.00732165	-0.0397554			0.403333	-0.024066	-0.0309665	-0.0406975	-0.0404532
0.406667	-0.0531401	-0.0549911	-0.00436675	-0.0418082			0.406667	-0.0269113	-0.03604	-0.0383593	-0.0435258
0.41	-0.0535059	-0.053747	-0.00451493	-0.0400126			0.41	-0.0321597	-0.0410679	-0.0394001	-0.0449853
0.413333	-0.0514772	-0.0566611	-0.00501421	-0.0421659			0.413333	-0.0270366	-0.0386349	-0.0418	-0.0445918
0.416667	-0.0510108	-0.0515129	-0.00424663	-0.0425217			0.416667	-0.0323442	-0.039132	-0.039725	-0.0403872
0.42	-0.0508537	-0.0547287	-0.0049703	-0.0427714			0.42	-0.0278708	-0.0365362	-0.0392195	-0.0448209
0.423333	-0.0500371	-0.0571782	-0.00522803	-0.0417504			0.423333	-0.0326193	-0.0309976	-0.0396176	-0.0457987
0.426667	-0.0541482	-0.0599482	-0.00419268	-0.0411319			0.426667	-0.0310354	-0.0323208	-0.0409996	-0.0450367
0.43	-0.0570238	-0.057941	-0.00506221	-0.0382462			0.43	-0.0259319	-0.043639	-0.032972	-0.0454081
0.433333	-0.059454	-0.0589722	-0.00685353	-0.0369259			0.433333	-0.0311513	-0.0441689	-0.0394793	-0.045275
0.436667	-0.0589443	-0.0594826	-0.00530349	-0.0366152			0.436667	-0.024237	-0.0412639	-0.0380843	-0.0469452
0.44	-0.0593075	-0.0580466	-0.00609371	-0.0388874			0.44	-0.0331636	-0.0424757	-0.038885	-0.0425432
0.443333	-0.0564491	-0.0622507	-0.00799529	-0.0395875			0.443333	-0.0255321	-0.0408268	-0.0418106	-0.0435357
0.446667	-0.0542674	-0.0660506	-0.00788707	-0.0412963			0.446667	-0.0315841	-0.0363631	-0.0387963	-0.0504323
0.45	-0.0512632	-0.0686018	-0.0086856	-0.0427111			0.45	-0.0352797	-0.0426681	-0.0432448	-0.0478225
0.453333	-0.0513072	-0.0659461	-0.00970839	-0.0450575			0.453333	-0.0303306	-0.0411474	-0.0389	-0.0403051
0.456667	-0.0523194	-0.0669666	-0.00962023	-0.0437803			0.456667	-0.0329537	-0.0408491	-0.0473242	-0.0500555
0.46	-0.0534822	-0.0623999	-0.011131	-0.043797			0.46	-0.0357251	-0.0417501	-0.0394232	-0.0450534
0.463333	-0.0555609	-0.0622742	-0.0103277	-0.0441567			0.463333	-0.0311065	-0.0400997	-0.0377184	-0.0452782
0.466667	-0.0561388	-0.063717	-0.00990634	-0.0441158			0.466667	-0.0322899	-0.0390919	-0.0430433	-0.0460717
0.47	-0.0562774	-0.0619409	-0.00906153	-0.0458134			0.47	-0.0321835	-0.0398349	-0.0455764	-0.0481997
0.473333	-0.0575475	-0.0599464	-0.00920441	-0.0471619			0.473333	-0.0300774	-0.0420061	-0.0466332	-0.0477068
0.476667	-0.0557231	-0.0683311	-0.0072032	-0.0475495			0.476667	-0.0317179	-0.0468359	-0.0390226	-0.0505586
0.48	-0.0540317	-0.0624024	-0.00847933	-0.0490193			0.48	-0.031109	-0.0393359	-0.0394617	-0.0475318
0.483333	-0.0541987	-0.0635556	-0.0076025	-0.0494783			0.483333	-0.0302109	-0.0432326	-0.0452201	-0.0490518
0.486667	-0.0548324	-0.0656902	-0.00860005	-0.0487559			0.486667	-0.0298381	-0.0429221	-0.0486822	-0.0479459
0.49	-0.0556194	-0.0669117	-0.0084007	-0.0493767			0.49	-0.0345091	-0.0416629	-0.0462953	-0.0528316
0.493333	-0.0565512	-0.0613391	-0.00822799	-0.0481365			0.493333	-0.0358967	-0.0404902	-0.0448158	-0.0482841
0.496667	-0.0582417	-0.0673498	-0.00980442	-0.0469752			0.496667	-0.0327526	-0.0406761	-0.0434653	-0.0499781
0.5	0.119366	0.126248	0.0803831	0.0914049			0.5	-0.0630963	-0.0823486	-0.0909693	-0.102425
0.503333	0.152649	0.167162	0.103212	0.111707			0.503333	-0.0608683	-0.0756557	-0.0846797	-0.101118
0.506667	0.174418	0.170701	0.124583	0.112915			0.506667	-0.0564334	-0.0717132	-0.0850259	-0.0980697
0.51	0.179033	0.169294	0.144239	0.116516			0.51	-0.0567161	-0.0706707	-0.0759245	-0.0893185
0.513333	0.179402	0.185106	0.158037	0.126823			0.513333	-0.0493133	-0.0647301	-0.0734991	-0.0849774
0.516667	0.19374	0.197028	0.172764	0.133253			0.516667	-0.055349	-0.0630077	-0.0758715	-0.0826198
0.52	0.195407	0.200643	0.184814	0.138206			0.52	-0.0492864	-0.0597078	-0.0686246	-0.0874815
0.523333	0.195189	0.204094	0.192075	0.14496			0.523333	-0.0495425	-0.0644133	-0.0701169	-0.0809907
0.526667	0.195956	0.209645	0.195191	0.149098			0.526667	-0.0452713	-0.0619909	-0.063589	-0.080968
0.53	0.19723	0.214707	0.198732	0.150829			0.53	-0.0442688	-0.0554704	-0.0658978	-0.0779151
0.533333	0.195344	0.216904	0.202954	0.155035			0.533333	-0.0511472	-0.0517974	-0.0621589	-0.0719792
0.536667	0.196631	0.218907	0.208525	0.155576			0.536667	-0.0502632	-0.0575164	-0.0588643	-0.0671726
0.54	0.198749	0.223295	0.215335	0.15614			0.54	-0.0423125	-0.0585295	-0.0630406	-0.0699797
0.543333	0.198362	0.223214	0.219038	0.155828			0.543333	-0.0446873	-0.0575377	-0.054663	-0.0675657
0.546667	0.19739	0.218153	0.223324	0.158972			0.546667	-0.0456594	-0.048661	-0.0529868	-0.0639083
0.55	0.200409	0.215913	0.228665	0.160635			0.55	-0.0468248	-0.0548856	-0.0548441	-0.0580476
0.553333	0.200495	0.218282	0.225978	0.159957			0.553333	-0.0407772	-0.0557704	-0.0473173	-0.0563993
0.556667	0.196782	0.216538	0.223619	0.161578			0.556667	-0.041239	-0.0485211	-0.0457292	-0.0511409
0.56	0.197291	0.2151	0.230821	0.165423			0.56	-0.0457601	-0.0532092	-0.0444338	-0.0512707
0.563333	0.198164	0.219963	0.233177	0.166324			0.563333	-0.0457815	-0.0517713	-0.0417675	-0.0500942
0.566667	0.196843	0.224147	0.235311	0.167026			0.566667	-0.0378795	-0.0471832	-0.0418242	-0.0445556
0.57	0.19733	0.22339	0.242354	0.170019			0.57	-0.042231	-0.0501271	-0.0393179	-0.0454962
0.573333	0.199079	0.224822	0.246814	0.16911			0.573333	-0.0454638	-0.0499592	-0.0398656	-0.0378738
0.576667	0.199373	0.230936	0.245003	0.17007			0.576667	-0.0400817	-0.0461259	-0.0391272	-0.0395387
0.58	0.200204	0.231468	0.245355	0.171342			0.58	-0.0404647	-0.0464062	-0.0356788	-0.0385981
0.583333	0.199724	0.22845	0.246327	0.175765			0.583333	-0.0382327	-0.0485562	-0.0323596	-0.0312463
0.586667	0.199348	0.229969	0.246321	0.178383			0.586667	-0.0397254	-0.0381105	-0.0333963	-0.0254483
0.59	0.200962	0.23369	0.247732	0.181051			0.59	-0.0407934	-0.0438468	-0.0263017	-0.0277011
0.593333	0.200737	0.233739	0.250779	0.183745			0.593333	-0.0414923	-0.0414011	-0.0247191	-0.0227291
0.596667	0.201035	0.232637	0.255643	0.185622			0.596667	-0.040406	-0.0388737	-0.0276037	-0.0166095
0.6	0.201368	0.233749	0.258662	0.184219			0.6	-0.0371803	-0.0379927	-0.0233419	-0.0171227
0.603333	0.200045	0.233464	0.261781	0.184725			0.603333	-0.0359358	-0.0424166	-0.0222885	-0.0143651
0.606667	0.199169	0.232373	0.263394	0.187852			0.606667	-0.0419184	-0.0416001	-0.0168346	-0.0101182
0.61	0.199162	0.233084	0.266328	0.187724			0.61	-0.0332244	-0.0341397	-0.023104	-0.00920434
0.613333	0.197255	0.237515	0.267073	0.190914			0.613333	-0.0363275	-0.0347137	-0.0163354	-0.00505046
0.616667	0.196524	0.244646	0.269349	0.198166			0.616667	-0.0404211	-0.037978	-0.0190699	-0.00802822
0.62	0.197437	0.24419	0.271411	0.203209			0.62	-0.0405277	-0.032461	-0.0123374	0.00185417
0.623333	0.196511	0.247691	0.276238	0.205876			0.623333	-0.0314564	-0.0327223	-0.0131059	0.00407018
0.626667	0.195607	0.251914	0.277054	0.209995			0.626667	-0.0310518	-0.031782	-0.00713791	0.00755635
0.63	0.195981	0.250283	0.27631	0.209331			0.63	-0.0336014	-0.0294465	-0.00678113	0.0080562
0.633333	0.196883	0.251969	0.273569	0.205564			0.633333	-0.0323811	-0.0280822	-0.00260502	0.00883057
0.636667	0.196699	0.258131	0.275925	0.205489			0.636667	-0.0326485	-0.0253213	-0.00576041	0.0154048
0.64	0.197606	0.259061	0.274328	0.206319			0.64	-0.0305095	-0.0213619	0.00207615	0.0194314
0.643333	0.196911	0.258641	0.274318	0.20707			0.643333	-0.0217436	-0.0227071	-0.00321657	0.0222329
0.646667	0.19917	0.262066	0.279449	0.211036			0.646667	-0.0305679	-0.0240007	0.00284435	0.0220093
0.65	0.198983	0.263498	0.288043	0.21615			0.65	-0.0280851	-0.0210469	0.00985433	0.0235789
0.653333	0.199613	0.266281	0.286625	0.215992			0.653333	-0.0288655	-0.0196769	0.00728432	0.0289793
0.656667	0.198128	0.269673	0.288792	0.217178			0.656667	-0.0174269	-0.0186764	0.00741873	0.0309587
0.66	0.198803	0.27287	0.293713	0.222204			0.66	-0.029616	-0.0206762	0.0108292	0.0376303
0.663333	0.198228	0.276522	0.291681	0.224284			0.663333	-0.0281361	-0.0161924	0.0104637	0.0457169
0.666667	0.198354	0.277112	0.289629	0.224597			0.666667	-0.0217898	-0.0155829	0.0144113	0.0419707
0.67	0.196704	0.280682	0.297492	0.227818			0.67	-0.0266945	-0.0165395	0.0161618	0.0469554
0.673333	0.196731	0.278859	0.298977	0.231158			0.673333	-0.0281167	-0.0103112	0.0127705	0.0496104
0.676667	0.197751	0.280432	0.297296	0.230996			0.676667	-0.0227791	-0.00719605	0.0120996	0.0528099
0.68	0.196778	0.280664	0.302357	0.231246			0.68	-0.0255888	-0.0090109	0.0179892	0.0601822
0.683333	0.19647	0.28572	0.305184	0.236142			0.683333	-0.022904	-0.00638018	0.0222678	0.0595818
0.686667	0.196831	0.282932	0.301161	0.23927			0.686667	-0.0234609	-0.00977336	0.0223167	0.0650774
0.69	0.196642	0.290828	0.303131	0.241662			0.69	-0.018376	-0.00283008	0.0284796	0.0730585
0.693333	0.196777	0.29152	0.306294	0.241933			0.693333	-0.0249015	-0.00225607	0.0300708	0.0717276
0.696667	0.195604	0.297549	0.304444	0.247225			0.696667	-0.024497	0.00207289	0.0308546	0.0730196
0.7	0.194533	0.295253	0.305726	0.249596			0.7	-0.022114	-0.00170128	0.0327389	0.0756136
0.703333	0.194675	0.30222	0.310318	0.252962			0.703333	-0.018832	0.0005578	0.035922	0.0822863
0.706667	0.195201	0.302673	0.307701	0.253797			0.706667	-0.018744	0.00840401	0.0309352	0.0869976
0.71	0.194682	0.309972	0.311001	0.260782			0.71	-0.0180396	0.00589477	0.0379645	0.0847405
0.713333	0.195173	0.311491	0.31508	0.260674			0.713333	-0.021117	0.00692146	0.0407319	0.0904777
0.716667	0.194268	0.316422	0.314799	0.260046			0.716667	-0.0230307	0.011702	0.0403742	0.0939636
0.72	0.194398	0.320696	0.315225	0.261355			0.72	-0.017633	0.0107222	0.0434082	0.0943267
0.723333	0.194558	0.324844	0.321206	0.263216			0.723333	-0.0178751	0.01696	0.0437002	0.0982761
0.726667	0.193809	0.323374	0.321127	0.262054			0.726667	-0.0141345	0.0179999	0.0482615	0.104473
0.73	0.193619	0.326473	0.323598	0.263039			0.73	-0.0139413	0.0143374	0.0512376	0.111241
0.733333	0.194901	0.334659	0.330479	0.265262			0.733333	-0.0117546	0.01998	0.0479547	0.110609
0.736667	0.194216	0.334589	0.333264	0.267817			0.736667	-0.00934269	0.0205739	0.0544678	0.114266
0.74	0.195178	0.338407	0.336979	0.269464			0.74	-0.00903745	0.0256982	0.05162	0.119082
0.743333	0.195354	0.344271	0.340635	0.274621			0.743333	-0.0153309	0.0256724	0.0567645	0.124286
0.746667	0.194927	0.347816	0.341804	0.280383			0.746667	-0.00926516	0.0275588	0.0614682	0.123863
0.75	0.1942	0.347506	0.341848	0.286487			0.75	-0.0115204	0.0334247	0.0604873	0.127387
0.753333	0.195111	0.351595	0.340741	0.290253			0.753333	-0.0126696	0.0337709	0.0642888	0.132401
0.756667	0.19388	0.353471	0.34149	0.295349			0.756667	-0.0124798	0.0335181	0.0625991	0.138072
0.76	0.193631	0.358919	0.338837	0.294546			0.76	-0.00913347	0.0350353	0.0600936	0.138395
0.763333	0.193255	0.363766	0.337677	0.294737			0.763333	-0.00626471	0.0366599	0.0679074	0.142084
0.766667	0.194725	0.369115	0.338211	0.297686			0.766667	-0.0109311	0.0423108	0.0742752	0.14117
0.77	0.194257	0.371884	0.340118	0.298038			0.77	-0.0085202	0.0366692	0.0722236	0.148915
0.773333	0.195288	0.377258	0.337781	0.298245			0.773333	-0.00208919	0.0430358	0.0720723	0.153563
0.776667	0.194413	0.378715	0.340821	0.301704			0.776667	-0.00678706	0.0475199	0.0768441	0.156817
0.78	0.194849	0.382734	0.344924	0.304315			0.78	-0.00455925	0.0493906	0.0777375	0.158428
0.783333	0.195093	0.3881	0.34596	0.303918			0.783333	-0.00125027	0.0564251	0.0832268	0.164434
0.786667	0.194057	0.395517	0.346939	0.307622			0.786667	-0.00561874	0.0549362	0.081077	0.165547
0.79	0.192907	0.399689	0.349847	0.310735			0.79	-0.00765957	0.0567105	0.0823437	0.169588
0.793333	0.194314	0.40408	0.352996	0.31193			0.793333	-0.00282682	0.0576938	0.0830469	0.177688
0.796667	0.195298	0.408308	0.350066	0.315621			0.796667	0.00017395	0.0626742	0.0927835	0.180458
0.8	0.193824	0.411021	0.350886	0.319295			0.8	-0.0043558	0.0665792	0.0932759	0.182665
0.803333	0.195395	0.415654	0.351318	0.321872			0.803333	0.00078516	0.0653227	0.092523	0.183348
0.806667	0.195618	0.418705	0.352547	0.324833			0.806667	0.00272014	0.0686365	0.0942579	0.189998
0.81	0.195542	0.422733	0.350925	0.328754			0.81	0.00342386	0.072059	0.0944396	0.193712
0.813333	0.194872	0.428677	0.358696	0.328951			0.813333	0.00376858	0.0719086	0.0920157	0.197928
0.816667	0.196152	0.434161	0.362501	0.329612			0.816667	0.00019351	0.0751311	0.101082	0.201591
0.82	0.195757	0.43926	0.36636	0.333267			0.82	-0.00112677	0.0795961	0.0986976	0.203265
0.823333	0.195416	0.444107	0.369368	0.336697			0.823333	0.00728333	0.0869062	0.103489	0.206536
0.826667	0.194582	0.450475	0.371378	0.340724			0.826667	0.00422953	0.0812682	0.105149	0.210392
0.83	0.195866	0.449724	0.370132	0.344284			0.83	-0.00127943	0.0864712	0.109396	0.213128
0.833333	0.196091	0.456012	0.368151	0.34786			0.833333	0.00416773	0.08795	0.112721	0.215822
0.836667	0.197612	0.457209	0.367786	0.346424			0.836667	0.00497001	0.0875272	0.108734	0.226932
0.84	0.199698	0.462517	0.367711	0.347373			0.84	0.00731668	0.0973247	0.122115	0.224895
0.843333	0.202628	0.466475	0.368983	0.345922			0.843333	0.00819038	0.0961205	0.115867	0.221344
0.846667	0.201197	0.473495	0.370523	0.344808			0.846667	0.00382707	0.0996845	0.116143	0.235227
0.85	0.2008	0.475179	0.373096	0.346055			0.85	0.0115584	0.10253	0.123351	0.240321
0.853333	0.197872	0.483213	0.376469	0.349523			0.853333	0.0119912	0.104218	0.120529	0.239885
0.856667	0.195378	0.488226	0.381024	0.34905			0.856667	0.0121437	0.110001	0.126201	0.240729
0.86	0.193046	0.493568	0.384264	0.353155			0.86	0.0123928	0.110894	0.121556	0.246026
0.863333	0.194095	0.498206	0.386608	0.358666			0.863333	0.0136023	0.115668	0.126298	0.256205
0.866667	0.192756	0.504665	0.391302	0.363958			0.866667	0.00816943	0.113153	0.129375	0.250432
0.87	0.19623	0.509712	0.392385	0.36595			0.87	0.0123419	0.122937	0.132616	0.255109
0.873333	0.197911	0.51381	0.39454	0.37259			0.873333	0.0168077	0.119463	0.131774	0.259047
0.876667	0.198347	0.517751	0.394714	0.373757			0.876667	0.0170726	0.123802	0.132207	0.257333
0.88	0.198798	0.523129	0.394677	0.374521			0.88	0.0133001	0.130844	0.138548	0.267983
0.883333	0.201382	0.527486	0.394606	0.374951			0.883333	0.0127249	0.134923	0.142567	0.268292
0.886667	0.199465	0.530124	0.398601	0.378528			0.886667	0.0135651	0.133675	0.137641	0.279569
0.89	0.198863	0.531843	0.397267	0.376645			0.89	0.0193283	0.144676	0.138503	0.274957
0.893333	0.197551	0.53802	0.403731	0.379772			0.893333	0.0197211	0.137442	0.143871	0.28046
0.896667	0.198314	0.542418	0.409703	0.383733			0.896667	0.0208907	0.142976	0.144421	0.284447
0.9	0.198533	0.549228	0.408907	0.383477			0.9	0.0206478	0.146492	0.152681	0.286688
0.903333	0.198605	0.553678	0.410929	0.383361			0.903333	0.0204923	0.149627	0.15382	0.289904
0.906667	0.200312	0.561174	0.416436	0.387376			0.906667	0.0207267	0.154839	0.15417	0.295076
0.91	0.20251	0.569232	0.414519	0.38628			0.91	0.0251572	0.158159	0.157904	0.298843
0.913333	0.200496	0.575481	0.413659	0.388392			0.913333	0.0269648	0.162041	0.163381	0.30699
0.916667	0.19947	0.580977	0.418315	0.392394			0.916667	0.0264584	0.161094	0.158343	0.303357
0.92	0.199309	0.58859	0.418375	0.395364			0.92	0.0276857	0.163997	0.162576	0.309624
0.923333	0.196601	0.591721	0.418969	0.396186			0.923333	0.0304459	0.168504	0.16665	0.310203
0.926667	0.196081	0.59002	0.423526	0.399046			0.926667	0.0268453	0.173273	0.168485	0.313987
0.93	0.197513	0.593492	0.426994	0.399987			0.93	0.0270745	0.177958	0.168845	0.319444
0.933333	0.198118	0.599998	0.429822	0.404918			0.933333	0.0328032	0.183532	0.173772	0.318075
0.936667	0.196764	0.601234	0.433018	0.407738			0.936667	0.0287799	0.183156	0.177458	0.324183
0.94	0.195544	0.611265	0.432868	0.411642			0.94	0.0339031	0.191089	0.1746	0.327536
0.943333	0.19566	0.620019	0.436005	0.415369			0.943333	0.0328787	0.189528	0.175713	0.326119
0.946667	0.194144	0.62808	0.43674	0.415267			0.946667	0.0357681	0.194695	0.175477	0.335405
0.95	0.193315	0.630439	0.43579	0.413297			0.95	0.0375963	0.201654	0.179309	0.336334
0.953333	0.193564	0.636155	0.437064	0.410518			0.953333	0.0367157	0.199488	0.180051	0.343536
0.956667	0.196714	0.642347	0.439054	0.411096			0.956667	0.0380945	0.206576	0.183824	0.346511
0.96	0.196603	0.647801	0.436103	0.413421			0.96	0.0408282	0.20059	0.187871	0.348096
0.963333	0.198623	0.651594	0.438146	0.413726			0.963333	0.037719	0.209804	0.187168	0.349416
0.966667	0.198498	0.660214	0.439921	0.416158			0.966667	0.0430993	0.212345	0.193977	0.350949
0.97	0.199494	0.669771	0.44226	0.421057			0.97	0.0382051	0.219596	0.191881	0.358321
0.973333	0.197007	0.670116	0.443269	0.423001			0.973333	0.0376932	0.22367	0.194383	0.355783
0.976667	0.198024	0.675297	0.44647	0.424783			0.976667	0.0402407	0.228361	0.192074	0.359919
0.98	0.197807	0.68449	0.447866	0.428874			0.98	0.0445555	0.226291	0.200021	0.368151
0.983333	0.195884	0.688332	0.447133	0.431989			0.983333	0.0474088	0.229949	0.198157	0.367594
0.986667	0.197023	0.697169	0.44783	0.434536			0.986667	0.0450594	0.235677	0.201488	0.371854
0.99	0.200413	0.705993	0.452889	0.43697			0.99	0.0462645	0.245369	0.201025	0.373901
0.993333	0.198604	0.711351	0.457732	0.438704			0.993333	0.0519822	0.245126	0.20626	0.384087
0.996667	0.196705	0.713206	0.45543	0.441919			0.996667	0.0461759	0.244745	0.206443	0.381028
1	0.19878	0.720153	0.462568	0.441293			1	0.0489408	0.255657	0.206507	0.38439
1.00333	0.198983	0.720656	0.464378	0.440455			1.00333	0.0560315	0.249284	0.208488	0.389042
1.00667	0.194955	0.725478	0.46404	0.442378			1.00667	0.049521	0.262479	0.21655	0.386997
1.01	0.196626	0.732875	0.463085	0.441356			1.01	0.0518597	0.259999	0.218291	0.394455
1.01333	0.198556	0.741339	0.469297	0.440233			1.01333	0.0526107	0.263982	0.217256	0.399788
1.01667	0.199302	0.75134	0.470091	0.441797			1.01667	0.0522401	0.272756	0.220207	0.399773
1.02	0.198166	0.759022	0.472921	0.445264			1.02	0.061431	0.274828	0.219886	0.40181
1.02333	0.202936	0.767578	0.474923	0.446483			1.02333	0.0574594	0.275519	0.227499	0.403937
1.02667	0.204215	0.774264	0.478283	0.452747			1.02667	0.058404	0.290985	0.224533	0.4066
1.03	0.203985	0.777685	0.478686	0.458782			1.03	0.0569774	0.283314	0.225667	0.408125
1.03333	0.200997	0.785895	0.480701	0.459421			1.03333	0.0564942	0.294974	0.218222	0.416814
1.03667	0.203498	0.792519	0.481052	0.462223			1.03667	0.0618124	0.294799	0.229568	0.41872
1.04	0.200614	0.795149	0.482594	0.463588			1.04	0.0598673	0.29757	0.231471	0.418912
1.04333	0.19839	0.803026	0.480516	0.465389			1.04333	0.061389	0.308275	0.232884	0.422972
1.04667	0.19822	0.813411	0.483592	0.463968			1.04667	0.0642598	0.306368	0.237564	0.426182
1.05	0.20282	0.818242	0.484261	0.465514			1.05	0.0662516	0.306452	0.234363	0.429859
1.05333	0.201073	0.826848	0.486398	0.466614			1.05333	0.0586039	0.313495	0.239312	0.427024
1.05667	0.201855	0.839207	0.488828	0.466265			1.05667	0.0647608	0.316161	0.240258	0.43495
1.06	0.203636	0.845246	0.491401	0.462461			1.06	0.0643886	0.319415	0.240658	0.431402
1.06333	0.2064	0.850802	0.492278	0.462882			1.06333	0.0621509	0.325829	0.237816	0.436749
1.06667	0.204803	0.853726	0.492871	0.466862			1.06667	0.066822	0.330265	0.250495	0.440826
1.07	0.204572	0.857768	0.494719	0.466398			1.07	0.0693338	0.335019	0.244031	0.446741
1.07333	0.205229	0.861344	0.49752	0.466494			1.07333	0.0717197	0.340864	0.250097	0.448101
1.07667	0.207937	0.868142	0.500162	0.470292			1.07667	0.0709793	0.344003	0.248508	0.448146
1.08	0.207503	0.871332	0.500697	0.471093			1.08	0.0708815	0.345434	0.254714	0.452032
1.08333	0.209063	0.880848	0.500894	0.47264			1.08333	0.0696125	0.354699	0.255604	0.456465
1.08667	0.210847	0.889494	0.503189	0.47349			1.08667	0.0706435	0.354146	0.25501	0.458147
1.09	0.213788	0.894889	0.502131	0.474283			1.09	0.0749637	0.362705	0.261253	0.464325
1.09333	0.211411	0.900817	0.50554	0.473459			1.09333	0.0829001	0.36452	0.267518	0.463219
1.09667	0.212549	0.912762	0.507267	0.474124			1.09667	0.074304	0.369311	0.268672	0.46719
1.1	0.212844	0.923466	0.511969	0.478153			1.1	0.0757783	0.370263	0.264878	0.469864
1.10333	0.213617	0.931463	0.511758	0.482439			1.10333	0.0782206	0.378817	0.270369	0.470637
1.10667	0.211134	0.941144	0.514269	0.489379			1.10667	0.0854195	0.37887	0.273189	0.47373
1.11	0.211626	0.949596	0.512298	0.490979			1.11	0.0815973	0.391239	0.269737	0.47491
1.11333	0.210906	0.952712	0.516384	0.491676			1.11333	0.0817542	0.387576	0.270965	0.482941
1.11667	0.210769	0.960386	0.515543	0.489401			1.11667	0.0791603	0.394753	0.279778	0.475468
1.12	0.209529	0.96551	0.522034	0.489281			1.12	0.0871036	0.396888	0.275822	0.485263
1.12333	0.212115	0.97413	0.525233	0.486722			1.12333	0.0911331	0.407737	0.274001	0.482426
1.12667	0.210484	0.979271	0.528619	0.490395			1.12667	0.0846476	0.4055	0.279789	0.49148
1.13	0.209468	0.991166	0.527225	0.49297			1.13	0.0919084	0.413104	0.282146	0.493577
1.13333	0.210582	0.996444	0.53251	0.494779			1.13333	0.090274	0.416522	0.286101	0.492361
1.13667	0.211501	1.00248	0.532676	0.49746			1.13667	0.0872475	0.41606	0.287796	0.494732
1.14	0.207222	1.00635	0.531861	0.4985			1.14	0.091002	0.424241	0.289262	0.498987
1.14333	0.20863	1.01157	0.534572	0.49639			1.14333	0.0960158	0.429773	0.290015	0.502805
1.14667	0.208755	1.01788	0.537968	0.500857			1.14667	0.0973579	0.437935	0.290319	0.505882
1.15	0.207397	1.02669	0.539252	0.506385			1.15	0.0971832	0.437121	0.30028	0.507035
1.15333	0.207063	1.03621	0.540482	0.503934			1.15333	0.0965943	0.441985	0.295552	0.510057
1.15667	0.211312	1.04446	0.543229	0.508806			1.15667	0.102662	0.446328	0.298596	0.511902
1.16	0.210613	1.05067	0.543729	0.510436			1.16	0.0991345	0.445671	0.297375	0.513715
1.16333	0.211435	1.05886	0.544641	0.511705			1.16333	0.0974339	0.457974	0.300052	0.515058
1.16667	0.213108	1.0659	0.545037	0.50941			1.16667	0.098794	0.465804	0.303977	0.519694
1.17	0.213484	1.07416	0.545417	0.512171			1.17	0.106052	0.463762	0.299443	0.523393
1.17333	0.211646	1.08038	0.54937	0.510492			1.17333	0.0992162	0.467699	0.306833	0.523205
1.17667	0.214028	1.0925	0.553157	0.513522			1.17667	0.100608	0.47189	0.308926	0.524485
1.18	0.214887	1.09525	0.554272	0.513456			1.18	0.104858	0.480136	0.308137	0.528571
1.18333	0.21516	1.10473	0.556993	0.514192			1.18333	0.111046	0.484688	0.312782	0.526135
1.18667	0.213985	1.11186	0.559074	0.515159			1.18667	0.112637	0.489214	0.312403	0.533032
1.19	0.21479	1.12157	0.555211	0.516588			1.19	0.107861	0.492701	0.311165	0.5358
1.19333	0.215079	1.12661	0.554913	0.515693			1.19333	0.113787	0.497463	0.312252	0.53923
1.19667	0.21755	1.13837	0.557168	0.515492			1.19667	0.110773	0.503732	0.316635	0.538547
1.2	0.21676	1.1447	0.5579	0.517837			1.2	0.108757	0.506058	0.316177	0.537144
1.20333	0.219812	1.15323	0.558633	0.519985			1.20333	0.116402	0.511523	0.320659	0.546268
1.20667	0.220805	1.15722	0.562143	0.522719			1.20667	0.116404	0.519646	0.324357	0.540986
1.21	0.221685	1.16738	0.565177	0.525874			1.21	0.1147	0.520313	0.323235	0.546699
1.21333	0.219376	1.17263	0.566108	0.526622			1.21333	0.118723	0.525095	0.325278	0.55203
1.21667	0.223593	1.18142	0.568771	0.529342			1.21667	0.113816	0.525466	0.327302	0.549972
1.22	0.224281	1.19061	0.570466	0.528963			1.22	0.119053	0.533589	0.330487	0.556842
1.22333	0.225769	1.2031	0.576214	0.529178			1.22333	0.125254	0.542403	0.331977	0.551295
1.22667	0.225632	1.21022	0.578029	0.529669			1.22667	0.121621	0.546821	0.334307	0.557077
1.23	0.227015	1.21653	0.581516	0.532673			1.23	0.120645	0.547259	0.331729	0.563224
1.23333	0.223113	1.22277	0.585205	0.530931			1.23333	0.125109	0.553699	0.329489	0.564579
1.23667	0.223169	1.23174	0.58684	0.532467			1.23667	0.121385	0.558909	0.336555	0.561826
1.24	0.223376	1.23716	0.587372	0.530612			1.24	0.122326	0.565588	0.341694	0.563737
1.24333	0.223931	1.24513	0.587525	0.531862			1.24333	0.131112	0.568122	0.338908	0.567204
1.24667	0.223052	1.25606	0.588704	0.529216			1.24667	0.132122	0.574167	0.336788	0.573531
1.25	0.224894	1.26449	0.585367	0.530098			1.25	0.128184	0.581052	0.344917	0.574461
1.25333	0.224666	1.27397	0.588278	0.529951			1.25333	0.129093	0.583465	0.343891	0.575147
1.25667	0.226214	1.28642	0.587214	0.531809			1.25667	0.131109	0.587414	0.345697	0.577959
1.26	0.22534	1.29415	0.591671	0.534972			1.26	0.13863	0.596206	0.346297	0.58003
1.26333	0.228122	1.30351	0.593075	0.537144			1.26333	0.136725	0.600606	0.350119	0.579579
1.26667	0.229897	1.31179	0.599034	0.53651			1.26667	0.134299	0.604514	0.348343	0.579983
1.27	0.232947	1.31715	0.598737	0.538176			1.27	0.138325	0.609268	0.356836	0.58107
1.27333	0.230421	1.32258	0.602579	0.539339			1.27333	0.138665	0.618393	0.348721	0.582422
1.27667	0.23099	1.33089	0.602382	0.536127			1.27667	0.141368	0.611877	0.353665	0.588162
1.28	0.231731	1.33686	0.603876	0.53768			1.28	0.14055	0.6232	0.357034	0.585785
1.28333	0.232512	1.34536	0.602778	0.541496			1.28333	0.14305	0.629746	0.360152	0.589518
1.28667	0.232117	1.35719	0.608434	0.543087			1.28667	0.142304	0.630135	0.357488	0.594054
1.29	0.234857	1.36536	0.606849	0.54298			1.29	0.147149	0.643238	0.361301	0.593197
1.29333	0.236641	1.37439	0.608656	0.544431			1.29333	0.153885	0.643138	0.361559	0.594121
1.29667	0.235428	1.38551	0.609671	0.546901			1.29667	0.151588	0.648052	0.36753	0.596815
1.3	0.236405	1.39263	0.611544	0.545822			1.3	0.149803	0.656285	0.360492	0.599371
1.30333	0.237197	1.3998	0.610425	0.546837			1.30333	0.150164	0.660965	0.365921	0.598734
1.30667	0.237423	1.40719	0.615532	0.549003			1.30667	0.143318	0.660154	0.370654	0.59794
1.31	0.237979	1.41763	0.616882	0.551557			1.31	0.15354	0.671015	0.372666	0.602028
1.31333	0.240342	1.42461	0.619743	0.550369			1.31333	0.155109	0.670881	0.377173	0.605081
1.31667	0.238837	1.43289	0.621899	0.551243			1.31667	0.155692	0.67926	0.374906	0.604602
1.32	0.239922	1.44263	0.625497	0.551457			1.32	0.157651	0.691622	0.374283	0.610506
1.32333	0.24136	1.45249	0.626301	0.553544			1.32333	0.152615	0.685877	0.379702	0.609396
1.32667	0.240371	1.46076	0.628103	0.553355			1.32667	0.156312	0.693455	0.377322	0.613344
1.33	0.240627	1.46982	0.627991	0.553333			1.33	0.160627	0.701335	0.380995	0.618713
1.33333	0.241211	1.47928	0.632784	0.554917			1.33333	0.16148	0.703581	0.386824	0.620448
1.33667	0.241999	1.48799	0.632807	0.555729			1.33667	0.155884	0.712197	0.382564	0.609929
1.34	0.241575	1.49752	0.633339	0.556475			1.34	0.166386	0.719816	0.383974	0.622547
1.34333	0.244431	1.50552	0.634654	0.558842			1.34333	0.168248	0.718681	0.385832	0.616781
1.34667	0.243843	1.51311	0.63919	0.560733			1.34667	0.168413	0.726725	0.388828	0.616176
1.35	0.243908	1.52214	0.635367	0.561457			1.35	0.175622	0.731927	0.388478	0.623415
1.35333	0.242474	1.53246	0.636133	0.560439			1.35333	0.176878	0.738129	0.386477	0.622923
1.35667	0.244108	1.53854	0.638994	0.558984			1.35667	0.170225	0.737152	0.389936	0.622985
1.36	0.243778	1.54737	0.641659	0.561538			1.36	0.172361	0.742358	0.392303	0.626914
1.36333	0.243979	1.55589	0.641683	0.560725			1.36333	0.171409	0.750489	0.39502	0.627177
1.36667	0.246012	1.56602	0.649783	0.558462			1.36667	0.177031	0.756185	0.393227	0.627407
1.37	0.24576	1.57381	0.653475	0.558888			1.37	0.175757	0.757307	0.394279	0.631852
1.37333	0.244038	1.58493	0.655942	0.55904			1.37333	0.175499	0.768577	0.401482	0.635877
1.37667	0.244898	1.59229	0.656865	0.552314			1.37667	0.177316	0.771926	0.39622	0.635753
1.38	0.245079	1.60118	0.658195	0.553163			1.38	0.181578	0.779229	0.402236	0.637337
1.38333	0.244305	1.60854	0.659817	0.555412			1.38333	0.187214	0.784143	0.403893	0.636942
1.38667	0.244612	1.61932	0.662745	0.553645			1.38667	0.183282	0.785989	0.405042	0.635216
1.39	0.24549	1.62759	0.663709	0.554471			1.39	0.182623	0.793974	0.406035	0.647604
1.39333	0.246259	1.63641	0.665533	0.55443			1.39333	0.186799	0.798506	0.403683	0.641339
1.39667	0.248946	1.64523	0.669931	0.556214			1.39667	0.190182	0.805436	0.411248	0.640394
1.4	0.249321	1.65011	0.672087	0.559062			1.4	0.186329	0.80914	0.410379	0.642616
1.40333	0.251027	1.66126	0.67245	0.563203			1.40333	0.197437	0.815845	0.406261	0.643103
1.40667	0.251615	1.67062	0.673716	0.564418			1.40667	0.192671	0.81687	0.411153	0.641206
1.41	0.251743	1.68008	0.675408	0.56653			1.41	0.187319	0.824297	0.413317	0.648539
1.41333	0.251317	1.68998	0.673311	0.566963			1.41333	0.192583	0.835713	0.416438	0.650648
1.41667	0.254268	1.69946	0.676193	0.566927			1.41667	0.196154	0.838756	0.417813	0.64772
1.42	0.254014	1.70806	0.679225	0.566767			1.42	0.193425	0.838792	0.417141	0.653279
1.42333	0.253592	1.71566	0.679937	0.568473			1.42333	0.1966	0.850621	0.414171	0.647536
1.42667	0.253659	1.72342	0.677924	0.570735			1.42667	0.196531	0.849011	0.421236	0.649828
1.43	0.255114	1.72658	0.68124	0.569175			1.43	0.199083	0.841399	0.421159	0.656445
1.43333	0.25425	1.73947	0.678951	0.569604			1.43333	0.203935	0.861538	0.42578	0.654205
1.43667	0.256517	1.74811	0.679349	0.571186			1.43667	0.200094	0.865735	0.422562	0.655793
1.44	0.257396	1.75427	0.682548	0.568262			1.44	0.199139	0.872842	0.422845	0.657095
1.44333	0.259543	1.76388	0.688792	0.5691			1.44333	0.202341	0.877142	0.425897	0.662137
1.44667	0.259721	1.7761	0.688562	0.57182			1.44667	0.212934	0.884057	0.42817	0.665339
1.45	0.2614	1.78274	0.694188	0.571814			1.45	0.210109	0.889264	0.430419	0.664341
1.45333	0.260168	1.78744	0.694137	0.572442			1.45333	0.205357	0.89584	0.430364	0.663581
1.45667	0.263928	1.79863	0.69437	0.574573			1.45667	0.208877	0.897556	0.430766	0.662112
1.46	0.264882	1.80281	0.694121	0.57507			1.46	0.213084	0.90401	0.428547	0.664287
1.46333	0.265569	1.81001	0.696261	0.574917			1.46333	0.213421	0.909828	0.4339	0.657398
1.46667	0.265959	1.8182	0.695577	0.575357			1.46667	0.214517	0.916658	0.437529	0.670321
1.47	0.268418	1.83178	0.697735	0.573061			1.47	0.217375	0.925275	0.441079	0.66933
1.47333	0.268171	1.83986	0.699766	0.577313			1.47333	0.218153	0.923697	0.439709	0.668424
1.47667	0.269132	1.85213	0.703633	0.575323			1.47667	0.223766	0.932339	0.43837	0.672233
1.48	0.270252	1.86032	0.706159	0.57628			1.48	0.226167	0.935407	0.436912	0.674416
1.48333	0.271583	1.86963	0.702571	0.578794			1.48333	0.219256	0.941526	0.442065	0.674402
1.48667	0.271246	1.87582	0.702781	0.576866			1.48667	0.221468	0.948116	0.4417	0.671766
1.49	0.271582	1.88422	0.7013	0.573472			1.49	0.228365	0.95551	0.445344	0.671705
1.49333	0.271364	1.89399	0.70051	0.574161			1.49333	0.231569	0.950813	0.43857	0.674562
1.49667	0.272585	1.90547	0.702259	0.572672			1.49667	0.23131	0.957497	0.447512	0.676887
1.5	0.272066	1.91638	0.709118	0.567875			1.5	0.230276	0.968728	0.449938	0.681414
1.50333	0.274262	1.92505	0.713566	0.572345			1.50333	0.23145	0.974096	0.449377	0.676335
1.50667	0.274689	1.93422	0.716997	0.571309			1.50667	0.229127	0.980722	0.454346	0.677489
1.51	0.2749	1.94037	0.71818	0.570438			1.51	0.23405	0.984798	0.447432	0.680178
1.51333	0.273544	1.94723	0.721893	0.569332			1.51333	0.235209	0.989834	0.451474	0.682667
1.51667	0.274786	1.95286	0.720027	0.569605			1.51667	0.238037	0.998224	0.454866	0.678337
1.52	0.275849	1.96519	0.719016	0.568282			1.52	0.240884	1.00155	0.456004	0.681781
1.52333	0.274348	1.97287	0.719954	0.57015			1.52333	0.242164	1.01159	0.45304	0.690188
1.52667	0.274653	1.98128	0.720663	0.572703			1.52667	0.242426	1.00973	0.456793	0.685982
1.53	0.276849	1.99159	0.718515	0.575424			1.53	0.242561	1.01777	0.45502	0.686474
1.53333	0.2785	2.00288	0.726604	0.577094			1.53333	0.247468	1.01647	0.452552	0.690048
1.53667	0.279447	2.00692	0.730375	0.576582			1.53667	0.247218	1.02987	0.457476	0.686308
1.54	0.282384	2.01665	0.735393	0.576031			1.54	0.249052	1.03136	0.463509	0.693176
1.54333	0.282764	2.02498	0.735636	0.574641			1.54333	0.249965	1.04494	0.46336	0.688108
1.54667	0.283121	2.03087	0.735672	0.574899			1.54667	0.251513	1.04419	0.465222	0.68753
1.55	0.281747	2.03972	0.733507	0.57534			1.55	0.254586	1.05177	0.465328	0.69086
1.55333	0.282794	2.05524	0.732101	0.577571			1.55333	0.254596	1.05697	0.464093	0.692358
1.55667	0.283848	2.06171	0.731181	0.576438			1.55667	0.252314	1.06492	0.46708	0.688654
1.56	0.285707	2.07182	0.735465	0.576411			1.56	0.253256	1.06725	0.465521	0.693699
1.56333	0.285977	2.08515	0.737565	0.576639			1.56333	0.258583	1.07074	0.466938	0.694321
1.56667	0.288667	2.09408	0.740631	0.578494			1.56667	0.263786	1.08081	0.46914	0.696026
1.57	0.287845	2.10093	0.740334	0.576625			1.57	0.261721	1.07938	0.467283	0.697889
1.57333	0.288905	2.11379	0.740774	0.576838			1.57333	0.266539	1.09064	0.469073	0.698194
1.57667	0.289842	2.12449	0.740486	0.576986			1.57667	0.262606	1.09185	0.47417	0.702018
1.58	0.290034	2.13038	0.740163	0.576288			1.58	0.263267	1.10239	0.472281	0.699756
1.58333	0.291995	2.14099	0.738075	0.576391			1.58333	0.266376	1.10566	0.471931	0.698739
1.58667	0.291503	2.15109	0.743389	0.577366			1.58667	0.269197	1.11029	0.474942	0.697226
1.59	0.293321	2.15899	0.7465	0.580604			1.59	0.268431	1.12008	0.470855	0.702014
1.59333	0.293272	2.16359	0.74305	0.580921			1.59333	0.267115	1.12453	0.47688	0.706552
1.59667	0.293322	2.17302	0.746754	0.580169			1.59667	0.273352	1.12494	0.479956	0.706684
1.6	0.292141	2.17736	0.751087	0.58281			1.6	0.27386	1.13261	0.479865	0.697076
1.60333	0.294217	2.18752	0.753362	0.584226			1.60333	0.270271	1.13729	0.479592	0.702894
1.60667	0.294009	2.19759	0.753865	0.583115			1.60667	0.27815	1.14688	0.482839	0.709364
1.61	0.294325	2.20815	0.761453	0.586393			1.61	0.281902	1.14616	0.479393	0.706625
1.61333	0.297198	2.21733	0.761201	0.589501			1.61333	0.284396	1.15718	0.486332	0.707934
1.61667	0.299848	2.2312	0.760241	0.588209			1.61667	0.277231	1.15974	0.484561	0.709539
1.62	0.30061	2.24109	0.758832	0.588641			1.62	0.28416	1.16718	0.484638	0.702286
1.62333	0.301385	2.25077	0.759921	0.589992			1.62333	0.285521	1.16962	0.482439	0.712034
1.62667	0.302902	2.26203	0.760951	0.589681			1.62667	0.290944	1.17504	0.488354	0.706703
1.63	0.305134	2.27453	0.766097	0.588127			1.63	0.286565	1.1798	0.485876	0.706643
1.63333	0.304241	2.28159	0.767481	0.586191			1.63333	0.288646	1.19143	0.48625	0.707379
1.63667	0.304068	2.28975	0.766439	0.5849			1.63667	0.295845	1.19606	0.484027	0.708764
1.64	0.302567	2.29444	0.767574	0.586329			1.64	0.293677	1.20075	0.494146	0.710617
1.64333	0.303641	2.30371	0.768894	0.587822			1.64333	0.292204	1.20329	0.48922	0.712546
1.64667	0.303395	2.31143	0.763637	0.587664			1.64667	0.299638	1.20886	0.493019	0.716061
1.65	0.304446	2.32035	0.769695	0.586603			1.65	0.300511	1.21916	0.495135	0.710336
1.65333	0.307711	2.33093	0.776572	0.587326			1.65333	0.292934	1.22527	0.492389	0.711906
1.65667	0.309344	2.34169	0.772412	0.583407			1.65667	0.303119	1.22861	0.494032	0.713523
1.66	0.309479	2.34921	0.771925	0.580375			1.66	0.308447	1.23314	0.496042	0.710225
1.66333	0.310968	2.35572	0.776816	0.580195			1.66333	0.304537	1.23557	0.495515	0.714258
1.66667	0.311847	2.36397	0.77678	0.584485			1.66667	0.30554	1.24312	0.501339	0.71813
1.67	0.309334	2.37625	0.774873	0.584712			1.67	0.304979	1.24651	0.497672	0.715915
1.67333	0.310492	2.38274	0.78364	0.587916			1.67333	0.303062	1.25614	0.497059	0.718498
1.67667	0.313082	2.38992	0.783542	0.588362			1.67667	0.306951	1.26266	0.507684	0.72114
1.68	0.312092	2.40128	0.784834	0.586494			1.68	0.31307	1.26784	0.498557	0.713824
1.68333	0.311567	2.40904	0.785018	0.585579			1.68333	0.316039	1.26886	0.505348	0.719198
1.68667	0.314671	2.41848	0.788235	0.585756			1.68667	0.313356	1.28041	0.499911	0.720842
1.69	0.317234	2.43173	0.786635	0.585374			1.69	0.322191	1.27937	0.503308	0.718069
1.69333	0.316797	2.44353	0.78978	0.588681			1.69333	0.320866	1.2907	0.505545	0.719779
1.69667	0.31728	2.4524	0.792704	0.593338			1.69667	0.319165	1.29092	0.508502	0.725596
1.7	0.318832	2.46365	0.792872	0.592554			1.7	0.326526	1.29728	0.501701	0.716021
1.70333	0.318962	2.47449	0.793717	0.592274			1.70333	0.325915	1.30075	0.506903	0.720402
1.70667	0.318218	2.48382	0.79635	0.59114			1.70667	0.32764	1.30731	0.507095	0.725314
1.71	0.320845	2.49432	0.799122	0.588024			1.71	0.328454	1.31831	0.50299	0.722243
1.71333	0.323253	2.50336	0.799875	0.586608			1.71333	0.324388	1.31667	0.508059	0.725345
1.71667	0.324945	2.51287	0.80025	0.583716			1.71667	0.32804	1.3269	0.512796	0.724355
1.72	0.325344	2.5194	0.800026	0.583159			1.72	0.327305	1.33411	0.508104	0.725166
1.72333	0.328333	2.52712	0.801656	0.583668			1.72333	0.328895	1.33484	0.509516	0.722064
1.72667	0.327545	2.53552	0.801784	0.584512			1.72667	0.331194	1.34665	0.508153	0.723883
1.73	0.329014	2.54547	0.803969	0.585641			1.73	0.337863	1.34855	0.513839	0.724898
1.73333	0.33066	2.55317	0.803695	0.585652			1.73333	0.327806	1.35213	0.510595	0.721108
1.73667	0.333214	2.56423	0.807872	0.587013			1.73667	0.336512	1.35874	0.513625	0.724627
1.74	0.33376	2.57201	0.808349	0.589538			1.74	0.341787	1.36775	0.514422	0.733543
1.74333	0.336772	2.58267	0.809061	0.587043			1.74333	0.340182	1.37196	0.51645	0.723932
1.74667	0.337083	2.59121	0.808926	0.588095			1.74667	0.344795	1.37737	0.518656	0.727305
1.75	0.336487	2.60335	0.809461	0.593302			1.75	0.344575	1.37898	0.51686	0.728459
1.75333	0.337013	2.6104	0.808229	0.590996			1.75333	0.343029	1.3861	0.522542	0.723879
1.75667	0.337756	2.62272	0.807338	0.587277			1.75667	0.349147	1.38649	0.516487	0.733462
1.76	0.337679	2.63088	0.809551	0.588293			1.76	0.349543	1.3951	0.522009	0.724886
1.76333	0.338802	2.63949	0.810739	0.585411			1.76333	0.353907	1.40427	0.521086	0.731981
1.76667	0.340904	2.64563	0.815798	0.584108			1.76667	0.350776	1.40754	0.520923	0.730661
1.77	0.34097	2.65869	0.814329	0.588062			1.77	0.358889	1.41864	0.524173	0.727359
1.77333	0.340057	2.66451	0.818066	0.587855			1.77333	0.35956	1.41823	0.516257	0.729745
1.77667	0.341179	2.6743	0.816632	0.588916			1.77667	0.358393	1.42742	0.521799	0.733949
1.78	0.341769	2.68168	0.815034	0.591934			1.78	0.358788	1.43208	0.524162	0.727598
1.78333	0.343026	2.69479	0.816819	0.593322			1.78333	0.363812	1.44034	0.523853	0.731997
1.78667	0.342415	2.70441	0.820728	0.593119			1.78667	0.361225	1.43414	0.522917	0.728116
1.79	0.344465	2.71276	0.819814	0.595498			1.79	0.361344	1.45095	0.527012	0.731401
1.79333	0.345022	2.72207	0.825919	0.597557			1.79333	0.36577	1.45115	0.527033	0.732686
1.79667	0.346153	2.73141	0.83228	0.596439			1.79667	0.362978	1.46272	0.524466	0.733969
1.8	0.346919	2.7386	0.82882	0.594407			1.8	0.369082	1.46206	0.529264	0.735762
1.80333	0.348962	2.74747	0.82775	0.592134			1.80333	0.37119	1.46877	0.531577	0.733419
1.80667	0.350729	2.76063	0.831449	0.592611			1.80667	0.369047	1.47684	0.527028	0.73188
1.81	0.351135	2.76824	0.831555	0.590875			1.81	0.375238	1.48161	0.531007	0.727154
1.81333	0.352118	2.77771	0.830977	0.591657			1.81333	0.375926	1.49131	0.528365	0.734911
1.81667	0.352478	2.78724	0.83357	0.589592			1.81667	0.375779	1.48642	0.538306	0.73399
1.82	0.355482	2.79532	0.835506	0.590618			1.82	0.373772	1.49679	0.535161	0.734454
1.82333	0.356259	2.8035	0.836381	0.59073			1.82333	0.381708	1.50104	0.534158	0.739657
1.82667	0.356087	2.81328	0.837507	0.589094			1.82667	0.384346	1.51215	0.532321	0.734284
1.83	0.358508	2.82124	0.838109	0.589019			1.83	0.382559	1.51416	0.529816	0.738192
1.83333	0.35982	2.83006	0.840709	0.587432			1.83333	0.383341	1.5143	0.539058	0.734205
1.83667	0.36184	2.84336	0.843887	0.588273			1.83667	0.385511	1.5262	0.530259	0.735168
1.84	0.362158	2.85152	0.844008	0.589302			1.84	0.386855	1.53418	0.533378	0.739237
1.84333	0.364449	2.8578	0.843799	0.592774			1.84333	0.389978	1.53453	0.537528	0.734011
1.84667	0.364711	2.87033	0.847103	0.589285			1.84667	0.393129	1.54024	0.540539	0.737101
1.85	0.3655	2.88193	0.846608	0.594842			1.85	0.393552	1.54352	0.540318	0.732908
1.85333	0.364178	2.88713	0.846957	0.592282			1.85333	0.393408	1.55111	0.539836	0.736718
1.85667	0.363577	2.89279	0.846447	0.586753			1.85667	0.390495	1.55686	0.536477	0.736779
1.86	0.363837	2.90405	0.847324	0.586403			1.86	0.397176	1.56352	0.545089	0.734184
1.86333	0.363003	2.91228	0.843923	0.588369			1.86333	0.398455	1.5726	0.53727	0.735412
1.86667	0.3631	2.92134	0.845502	0.587466			1.86667	0.399136	1.57563	0.546944	0.731518
1.87	0.3637	2.93011	0.842678	0.588563			1.87	0.404832	1.57696	0.535557	0.742637
1.87333	0.365828	2.94405	0.841586	0.592437			1.87333	0.400308	1.5848	0.539003	0.737455
1.87667	0.365732	2.95213	0.84104	0.589752			1.87667	0.411659	1.58311	0.547131	0.736305
1.88	0.367957	2.95944	0.844119	0.587439			1.88	0.408467	1.59942	0.543555	0.733869
1.88333	0.370192	2.96553	0.845871	0.588767			1.88333	0.411878	1.60116	0.546642	0.73476
1.88667	0.37126	2.97908	0.848599	0.588455			1.88667	0.410793	1.60934	0.542164	0.739948
1.89	0.37529	2.9875	0.85215	0.586232			1.89	0.413022	1.60876	0.544958	0.741357
1.89333	0.377406	2.99523	0.854763	0.586988			1.89333	0.413176	1.62054	0.546585	0.745237
1.89667	0.378722	3.00591	0.853907	0.589929			1.89667	0.41526	1.6159	0.550381	0.740813
1.9	0.378339	3.01632	0.853401	0.589456			1.9	0.417466	1.6253	0.545007	0.738491
1.90333	0.378716	3.02463	0.852504	0.590498			1.90333	0.415134	1.62662	0.545478	0.739893
1.90667	0.377095	3.03171	0.853238	0.590815			1.90667	0.413775	1.63404	0.544353	0.742537
1.91	0.377105	3.04309	0.854562	0.591777			1.91	0.421848	1.65016	0.548595	0.7391
1.91333	0.378507	3.05233	0.856926	0.589516			1.91333	0.429494	1.64926	0.54864	0.737465
1.91667	0.381193	3.06109	0.859904	0.587974			1.91667	0.423413	1.64993	0.546916	0.742089
1.92	0.382193	3.06794	0.863008	0.587755			1.92	0.430236	1.65832	0.55396	0.740181
1.92333	0.383361	3.07872	0.864284	0.588458			1.92333	0.428868	1.6685	0.543807	0.739
1.92667	0.385953	3.08795	0.863598	0.587963			1.92667	0.432261	1.66974	0.559275	0.74281
1.93	0.386815	3.09626	0.864815	0.587152			1.93	0.432958	1.67424	0.552543	0.74296
1.93333	0.38597	3.10801	0.865989	0.588282			1.93333	0.433915	1.68269	0.552113	0.744076
1.93667	0.388054	3.11829	0.867928	0.588016			1.93667	0.431386	1.68748	0.551971	0.740356
1.94	0.389889	3.12507	0.872131	0.588038			1.94	0.441979	1.69908	0.550548	0.742271
1.94333	0.389803	3.13368	0.874841	0.585881			1.94333	0.43329	1.6998	0.552532	0.741829
1.94667	0.392435	3.14091	0.87523	0.587455			1.94667	0.439715	1.70838	0.550002	0.745656
1.95	0.395473	3.14816	0.876087	0.587755			1.95	0.439525	1.7119	0.552295	0.742118
1.95333	0.3978	3.15608	0.878229	0.588031			1.95333	0.447468	1.71589	0.555061	0.745725
1.95667	0.39929	3.16466	0.875973	0.588296			1.95667	0.448908	1.72015	0.560602	0.742992
1.96	0.400879	3.17415	0.87311	0.589023			1.96	0.443729	1.72487	0.556476	0.744686
1.96333	0.401391	3.18461	0.874533	0.588521			1.96333	0.453416	1.73187	0.555631	0.743714
1.96667	0.401462	3.19353	0.877513	0.586738			1.96667	0.448904	1.73843	0.558442	0.74711
1.97	0.401157	3.20533	0.875456	0.587459			1.97	0.45174	1.74351	0.560399	0.743316
1.97333	0.401809	3.21734	0.876063	0.586061			1.97333	0.455618	1.75074	0.56152	0.741924
1.97667	0.404014	3.2243	0.879275	0.585475			1.97667	0.457421	1.74963	0.556194	0.747196
1.98	0.403925	3.23212	0.880839	0.585575			1.98	0.458112	1.75302	0.560663	0.741267
1.98333	0.403629	3.24011	0.878901	0.586903			1.98333	0.458075	1.7725	0.558141	0.746332
1.98667	0.404339	3.2481	0.879564	0.586884			1.98667	0.459691	1.76841	0.559162	0.74267
1.99	0.404236	3.2557	0.874164	0.588157			1.99	0.454392	1.77216	0.558487	0.739199
1.99333	0.405152	3.26483	0.874594	0.591503			1.99333	0.463126	1.77829	0.561237	0.740208
1.99667	0.408305	3.27267	0.874751	0.591412			1.99667	0.465723	1.78313	0.564018	0.743158
2	0.410982	3.28042	0.875489	0.590508			2	0.466248	1.79428	0.563554	0.744323
2.00333	0.413149	3.28903	0.876676	0.59039			2.00333	0.471864	1.79256	0.558332	0.746664
2.00667	0.415426	3.29782	0.882772	0.58835			2.00667	0.470764	1.79888	0.558538	0.747973
2.01	0.416965	3.30657	0.883391	0.586195			2.01	0.472	1.80409	0.562147	0.742334
2.01333	0.417056	3.31606	0.883857	0.587158			2.01333	0.471002	1.81339	0.562228	0.747118
2.01667	0.419874	3.32641	0.890777	0.586295			2.01667	0.470731	1.81472	0.561935	0.740193
2.02	0.420162	3.33613	0.893025	0.587136			2.02	0.469342	1.82311	0.561237	0.745332
2.02333	0.420513	3.34443	0.892458	0.588964			2.02333	0.481701	1.8224	0.564085	0.744558
2.02667	0.420628	3.3531	0.891707	0.58683			2.02667	0.479821	1.83439	0.567351	0.749579
2.03	0.422253	3.35988	0.894929	0.588674			2.03	0.483931	1.83209	0.569913	0.749903
2.03333	0.421949	3.36661	0.890491	0.588713			2.03333	0.489316	1.84341	0.566367	0.74611
2.03667	0.422972	3.37506	0.89294	0.587632			2.03667	0.486853	1.84273	0.566618	0.741179
2.04	0.424254	3.38386	0.896651	0.58838			2.04	0.491811	1.85393	0.567564	0.744861
2.04333	0.427004	3.3909	0.898307	0.591622			2.04333	0.494198	1.85991	0.568359	0.748989
2.04667	0.427821	3.39986	0.897049	0.591459			2.04667	0.491459	1.86209	0.567747	0.743876
2.05	0.428593	3.41245	0.895216	0.589846			2.05	0.49194	1.86941	0.567981	0.7411
2.05333	0.428597	3.4212	0.893964	0.587824			2.05333	0.49611	1.87088	0.57024	0.742292
2.05667	0.430214	3.42724	0.894739	0.588145			2.05667	0.493982	1.8799	0.565015	0.746588
2.06	0.429156	3.43503	0.895418	0.587726			2.06	0.494835	1.87749	0.572315	0.74829
2.06333	0.429695	3.44372	0.894258	0.587055			2.06333	0.493447	1.88666	0.569534	0.741344
2.06667	0.431017	3.44938	0.900932	0.588554			2.06667	0.500793	1.894	0.574399	0.748784
2.07	0.433599	3.46015	0.903451	0.592315			2.07	0.501719	1.89816	0.569545	0.746225
2.07333	0.433471	3.46866	0.904911	0.591328			2.07333	0.501765	1.90061	0.568212	0.747023
2.07667	0.434037	3.47681	0.904136	0.591827			2.07667	0.507752	1.90518	0.572474	0.742619
2.08	0.435493	3.48432	0.910493	0.589706			2.08	0.503443	1.91368	0.566518	0.741689
2.08333	0.435753	3.49507	0.909989	0.590425			2.08333	0.507658	1.91681	0.56781	0.747202
2.08667	0.43723	3.50109	0.909543	0.587826			2.08667	0.511621	1.92729	0.571131	0.745023
2.09	0.43728	3.51088	0.911974	0.58917			2.09	0.510897	1.92773	0.570519	0.746158
2.09333	0.43838	3.51558	0.914791	0.589584			2.09333	0.513323	1.9355	0.573301	0.746263
2.09667	0.440257	3.52508	0.913082	0.5903			2.09667	0.508163	1.93869	0.572054	0.745444
2.1	0.440254	3.53312	0.912171	0.587871			2.1	0.512689	1.94424	0.570319	0.739077
2.10333	0.441661	3.54213	0.910283	0.589201			2.10333	0.516692	1.94973	0.570122	0.747541
2.10667	0.444354	3.55005	0.907487	0.587689			2.10667	0.523347	1.9581	0.5709	0.749494
2.11	0.446518	3.56418	0.907913	0.587235			2.11	0.521183	1.96131	0.573379	0.744781
2.11333	0.445082	3.5713	0.906366	0.588286			2.11333	0.518465	1.96506	0.575014	0.74102
2.11667	0.44807	3.57954	0.910111	0.589666			2.11667	0.525161	1.97643	0.572032	0.741182
2.12	0.448762	3.59035	0.916225	0.589381			2.12	0.525211	1.97573	0.576148	0.746256
2.12333	0.448434	3.59791	0.916712	0.588759			2.12333	0.533909	1.97426	0.574972	0.751909
2.12667	0.44909	3.6055	0.915403	0.589766			2.12667	0.527434	1.98459	0.576465	0.748038
2.13	0.453932	3.6155	0.91827	0.587431			2.13	0.536261	1.99139	0.573171	0.747236
2.13333	0.456827	3.62118	0.915471	0.587954			2.13333	0.530753	2.00019	0.574279	0.746431
2.13667	0.45684	3.62933	0.914824	0.587181			2.13667	0.534607	1.99776	0.575184	0.743961
2.14	0.458276	3.63784	0.917807	0.588871			2.14	0.539516	2.00506	0.580954	0.75185
2.14333	0.460426	3.64357	0.919854	0.587151			2.14333	0.536352	2.01598	0.576821	0.746068
2.14667	0.45995	3.64995	0.918619	0.587873			2.14667	0.538689	2.01753	0.571291	0.743827
2.15	0.458819	3.65757	0.924085	0.585645			2.15	0.541742	2.02647	0.569929	0.746006
2.15333	0.46074	3.66398	0.921291	0.584713			2.15333	0.541227	2.02695	0.581531	0.748558
2.15667	0.462956	3.67144	0.91709	0.58314			2.15667	0.549626	2.02811	0.57527	0.745444
2.16	0.464176	3.68234	0.919525	0.584209			2.16	0.546055	2.03498	0.578189	0.740863
2.16333	0.467374	3.69034	0.922823	0.585978			2.16333	0.539802	2.0425	0.574126	0.748376
2.16667	0.470179	3.6998	0.918471	0.587842			2.16667	0.550261	2.04576	0.578595	0.750269
2.17	0.470697	3.70873	0.922233	0.588253			2.17	0.551165	2.05262	0.573775	0.739344
2.17333	0.471823	3.71855	0.92836	0.588359			2.17333	0.558166	2.05534	0.58218	0.745771
2.17667	0.473425	3.72468	0.929862	0.587224			2.17667	0.550906	2.06481	0.57621	0.751528
2.18	0.471738	3.73126	0.929292	0.582712			2.18	0.557195	2.06226	0.577809	0.745245
2.18333	0.472391	3.7391	0.932151	0.582205			2.18333	0.557289	2.07227	0.580203	0.748011
2.18667	0.474191	3.74749	0.931036	0.581069			2.18667	0.557817	2.07708	0.578018	0.751591
2.19	0.477427	3.7546	0.931965	0.580386			2.19	0.557835	2.07977	0.575939	0.745525
2.19333	0.47868	3.76356	0.931254	0.580025			2.19333	0.562345	2.08507	0.581313	0.744731
2.19667	0.4827	3.77426	0.931344	0.582804			2.19667	0.56324	2.09511	0.579911	0.74354
2.2	0.484275	3.78309	0.929579	0.583749			2.2	0.568687	2.10232	0.582269	0.747296
2.20333	0.487572	3.79287	0.930798	0.584807			2.20333	0.566726	2.10026	0.582323	0.743249
2.20667	0.488344	3.80115	0.929492	0.585762			2.20667	0.567284	2.10506	0.575831	0.752983
2.21	0.490066	3.80577	0.931907	0.584109			2.21	0.576383	2.11003	0.578987	0.747774
2.21333	0.489564	3.81418	0.93227	0.582918			2.21333	0.564983	2.12036	0.580889	0.746718
2.21667	0.489282	3.82594	0.937348	0.579408			2.21667	0.574999	2.12089	0.579534	0.74406
2.22	0.488024	3.82977	0.936045	0.5789			2.22	0.579871	2.1211	0.58803	0.744307
2.22333	0.48971	3.83719	0.936226	0.576694			2.22333	0.581541	2.13477	0.583128	0.746226
2.22667	0.490276	3.84546	0.935069	0.577832			2.22667	0.576366	2.13211	0.587722	0.747733
2.23	0.49191	3.8518	0.931708	0.577486			2.23	0.580622	2.14072	0.582093	0.743529
2.23333	0.492535	3.85933	0.930007	0.579301			2.23333	0.585426	2.15054	0.582227	0.740563
2.23667	0.494521	3.86999	0.937013	0.578154			2.23667	0.577461	2.14415	0.581472	0.745396
2.24	0.492626	3.87762	0.938548	0.57899			2.24	0.585485	2.15469	0.582896	0.743812
2.24333	0.494479	3.8879	0.935874	0.57864			2.24333	0.587593	2.16115	0.576439	0.742417
2.24667	0.497599	3.89543	0.944608	0.580285			2.24667	0.590699	2.16792	0.586278	0.74388
2.25	0.500029	3.90397	0.944199	0.580707			2.25	0.589061	2.17098	0.584287	0.742944
2.25333	0.500067	3.91179	0.941881	0.581887			2.25333	0.592853	2.17529	0.583161	0.745856
2.25667	0.503245	3.92061	0.94297	0.583172			2.25667	0.595802	2.17816	0.587641	0.746333
2.26	0.502972	3.92756	0.948725	0.584109			2.26	0.590569	2.18692	0.582872	0.743556
2.26333	0.503452	3.9339	0.946237	0.583941			2.26333	0.596471	2.19444	0.585437	0.745538
2.26667	0.504202	3.93882	0.945668	0.583391			2.26667	0.60076	2.19551	0.581042	0.747333
2.27	0.507151	3.94625	0.945535	0.581888			2.27	0.598995	2.19914	0.586494	0.745813
2.27333	0.507006	3.95609	0.949187	0.583728			2.27333	0.605537	2.20493	0.593012	0.745806
2.27667	0.511797	3.96388	0.944337	0.581944			2.27667	0.60639	2.20797	0.590846	0.74527
2.28	0.511599	3.97235	0.943526	0.580869			2.28	0.602498	2.20777	0.58728	0.738663
2.28333	0.512292	3.97892	0.947983	0.57775			2.28333	0.607271	2.22148	0.589857	0.742156
2.28667	0.513975	3.98569	0.950124	0.577757			2.28667	0.610009	2.22441	0.581688	0.745462
2.29	0.516434	3.98498	0.947421	0.573954			2.29	0.611042	2.22756	0.579133	0.744564
2.29333	0.513333	3.98909	0.954339	0.573037			2.29333	0.612649	2.23149	0.581488	0.749162
2.29667	0.516683	3.99614	0.955048	0.572042			2.29667	0.613208	2.23406	0.582436	0.742011
2.3	0.520291	4.00776	0.954206	0.574674			2.3	0.614874	2.23794	0.586227	0.74722
2.30333	0.522543	4.01657	0.952954	0.574978			2.30333	0.617604	2.24875	0.587411	0.746672
2.30667	0.524588	4.02998	0.957338	0.575909			2.30667	0.622967	2.24982	0.583595	0.74192
2.31	0.528157	4.04249	0.956687	0.575894			2.31	0.618057	2.25901	0.586209	0.747721
2.31333	0.528039	4.05122	0.95817	0.57642			2.31333	0.620937	2.25791	0.589598	0.74718
2.31667	0.525623	4.05981	0.958963	0.576392			2.31667	0.625203	2.26839	0.584116	0.745503
2.32	0.526644	4.06645	0.961137	0.575431			2.32	0.624435	2.26713	0.592885	0.744815
2.32333	0.527456	4.07047	0.956831	0.574498			2.32333	0.631181	2.28188	0.588228	0.740922
2.32667	0.527612	4.07469	0.959418	0.576676			2.32667	0.630676	2.27892	0.589472	0.742674
2.33	0.529063	4.08053	0.96268	0.575999			2.33	0.629315	2.28657	0.586517	0.74385
2.33333	0.53452	4.08707	0.964356	0.575473			2.33333	0.633029	2.28867	0.590986	0.745018
2.33667	0.536912	4.09245	0.962384	0.576997			2.33667	0.63655	2.29268	0.59218	0.739333
2.34	0.539249	4.10265	0.961886	0.576671			2.34	0.631985	2.3045	0.592644	0.746684
2.34333	0.541307	4.11183	0.958514	0.575593			2.34333	0.639054	2.29787	0.589104	0.742585
2.34667	0.542857	4.11904	0.954683	0.578023			2.34667	0.642249	2.31511	0.589773	0.740537
2.35	0.541599	4.12469	0.952307	0.576264			2.35	0.643099	2.31378	0.592928	0.747772
2.35333	0.541	4.13201	0.952715	0.575662			2.35333	0.639207	2.32297	0.592104	0.746252
2.35667	0.542282	4.13631	0.957257	0.577741			2.35667	0.64434	2.31829	0.594159	0.748384
2.36	0.544953	4.1441	0.961652	0.579151			2.36	0.646416	2.33107	0.598728	0.744526
2.36333	0.545925	4.14991	0.964925	0.578238			2.36333	0.645528	2.33555	0.596338	0.745288
2.36667	0.549822	4.16104	0.965078	0.579872			2.36667	0.650674	2.33903	0.590869	0.738567
2.37	0.55027	4.16826	0.969044	0.581356			2.37	0.654173	2.34231	0.585629	0.745405
2.37333	0.551465	4.17856	0.969599	0.579862			2.37333	0.652865	2.34722	0.590732	0.743099
2.37667	0.550281	4.18483	0.967703	0.579482			2.37667	0.653992	2.35551	0.59047	0.750637
2.38	0.551455	4.19438	0.968725	0.576842			2.38	0.658246	2.35073	0.589447	0.743802
2.38333	0.553269	4.20051	0.973054	0.578581			2.38333	0.653234	2.3599	0.592205	0.739939
2.38667	0.554796	4.20813	0.972844	0.576897			2.38667	0.656889	2.36664	0.593724	0.742158
2.39	0.55593	4.21049	0.971368	0.573661			2.39	0.65974	2.36939	0.592224	0.745324
2.39333	0.560837	4.21533	0.972391	0.571597			2.39333	0.666232	2.37356	0.58856	0.745141
2.39667	0.563877	4.22531	0.974049	0.572498			2.39667	0.664513	2.37483	0.591628	0.747116
2.4	0.5618	4.2329	0.976178	0.568581			2.4	0.664802	2.38311	0.594051	0.740409
2.40333	0.563763	4.23968	0.97536	0.568197			2.40333	0.665604	2.38629	0.594201	0.743968
2.40667	0.562549	4.2483	0.977149	0.570586			2.40667	0.67055	2.38874	0.590547	0.743484
2.41	0.562018	4.2551	0.977912	0.572121			2.41	0.675852	2.39381	0.594589	0.73996
2.41333	0.56316	4.25794	0.974686	0.573926			2.41333	0.672362	2.40227	0.592117	0.743978
2.41667	0.564504	4.26792	0.97556	0.574693			2.41667	0.677979	2.40415	0.594799	0.737697
2.42	0.562954	4.27554	0.975078	0.57582			2.42	0.680685	2.41189	0.591864	0.743198
2.42333	0.566064	4.28425	0.97621	0.578683			2.42333	0.677412	2.41635	0.589515	0.740217
2.42667	0.56902	4.29095	0.976041	0.580678			2.42667	0.674	2.42786	0.587109	0.738431
2.43	0.568707	4.29898	0.97793	0.581804			2.43	0.682496	2.42106	0.588611	0.741724
2.43333	0.571451	4.30354	0.975229	0.584522			2.43333	0.684603	2.42909	0.599369	0.739434
2.43667	0.57636	4.30932	0.975589	0.584962			2.43667	0.684616	2.43648	0.589835	0.74143
2.44	0.577573	4.31458	0.976221	0.582208			2.44	0.688187	2.43857	0.594178	0.736935
2.44333	0.576562	4.32198	0.9766	0.580846			2.44333	0.688535	2.44049	0.586929	0.74214
2.44667	0.578297	4.32778	0.977816	0.580987			2.44667	0.686283	2.45375	0.591603	0.742367
2.45	0.580583	4.33668	0.976031	0.577096			2.45	0.695155	2.45126	0.600331	0.742522
2.45333	0.580013	4.34467	0.973957	0.572787			2.45333	0.693893	2.45422	0.594003	0.742009
2.45667	0.58155	4.35278	0.971852	0.572351			2.45667	0.688655	2.45458	0.59725	0.740238
2.46	0.583779	4.36275	0.972651	0.570195			2.46	0.701743	2.4608	0.59517	0.741004
2.46333	0.586532	4.37027	0.973955	0.569241			2.46333	0.701559	2.4642	0.5953	0.742787
2.46667	0.588012	4.37401	0.975021	0.572144			2.46667	0.698166	2.46975	0.593716	0.737982
2.47	0.592257	4.37942	0.980705	0.575094			2.47	0.702185	2.47258	0.592031	0.742166
2.47333	0.593042	4.38148	0.982467	0.575071			2.47333	0.698095	2.4806	0.592303	0.744571
2.47667	0.59701	4.38651	0.984617	0.575504			2.47667	0.705298	2.48576	0.597528	0.74113
2.48	0.59726	4.39184	0.985923	0.575268			2.48	0.703661	2.49162	0.596078	0.741165
2.48333	0.598909	4.40173	0.991015	0.574479			2.48333	0.704071	2.4988	0.587601	0.738772
2.48667	0.599221	4.40993	0.990907	0.574522			2.48667	0.709312	2.49476	0.593801	0.739252
2.49	0.599639	4.42156	0.985217	0.57465			2.49	0.711982	2.50822	0.591107	0.745653
2.49333	0.598544	4.42703	0.978448	0.57571			2.49333	0.714605	2.50769	0.594031	0.737861
2.49667	0.601849	4.43311	0.976169	0.575224			2.49667	0.716607	2.5051	0.591118	0.740204
2.5	0.602517	4.43893	0.975191	0.573015			2.5	0.717064	2.51849	0.594335	0.740058
2.50333	0.603097	4.44406	0.97367	0.576681			2.50333	0.716784	2.52383	0.594849	0.743314
2.50667	0.605946	4.44954	0.97774	0.576569			2.50667	0.719708	2.52221	0.594776	0.743569
2.51	0.607146	4.45454	0.98372	0.575857			2.51	0.720071	2.5285	0.59764	0.740287
2.51333	0.606007	4.46232	0.983237	0.576464			2.51333	0.725152	2.53562	0.599621	0.742933
2.51667	0.607796	4.47219	0.979867	0.578705			2.51667	0.724165	2.54124	0.597209	0.74042
2.52	0.608397	4.47864	0.984782	0.575912			2.52	0.720691	2.54026	0.596662	0.735769
2.52333	0.61046	4.48665	0.989685	0.578886			2.52333	0.727278	2.5474	0.596095	0.73886
2.52667	0.613285	4.49693	0.98784	0.5789			2.52667	0.728236	2.55267	0.593578	0.741372
2.53	0.61663	4.50098	0.989892	0.577341			2.53	0.727217	2.55137	0.596841	0.739484
2.53333	0.618072	4.50124	0.99288	0.575382			2.53333	0.734383	2.56227	0.592121	0.737537
2.53667	0.617962	4.50684	0.989749	0.571895			2.53667	0.733867	2.55848	0.590854	0.738779
2.54	0.618368	4.50937	0.987728	0.568913			2.54	0.732862	2.56988	0.594092	0.739513
2.54333	0.618738	4.51554	0.990561	0.568124			2.54333	0.735444	2.56903	0.594474	0.735768
2.54667	0.617263	4.52456	0.989875	0.568059			2.54667	0.737606	2.57749	0.594549	0.741006
2.55	0.617403	4.53636	0.98891	0.569542			2.55	0.741484	2.57604	0.596372	0.735957
2.55333	0.621791	4.54291	0.991864	0.570954			2.55333	0.739396	2.58388	0.59273	0.739862
2.55667	0.623232	4.54935	0.99075	0.570811			2.55667	0.741542	2.58951	0.597904	0.740454
2.56	0.627073	4.55184	0.993077	0.569684			2.56	0.744138	2.59087	0.596928	0.73821
2.56333	0.629541	4.55629	0.993715	0.570027			2.56333	0.742584	2.59952	0.595191	0.737623
2.56667	0.630661	4.55983	0.99767	0.569949			2.56667	0.75187	2.60499	0.593848	0.735578
2.57	0.631125	4.56897	0.99533	0.571198			2.57	0.750476	2.6044	0.596652	0.740485
2.57333	0.633027	4.57792	0.99467	0.573116			2.57333	0.751991	2.61422	0.599834	0.737783
2.57667	0.632813	4.58264	0.989258	0.574244			2.57667	0.757672	2.61479	0.601684	0.736044
2.58	0.634548	4.59288	0.988612	0.572747			2.58	0.756828	2.61628	0.600489	0.736032
2.58333	0.637599	4.59974	0.983924	0.571579			2.58333	0.757561	2.61586	0.594693	0.734186
2.58667	0.638844	4.60365	0.983398	0.571413			2.58667	0.755375	2.62703	0.592635	0.732101
2.59	0.639306	4.60852	0.989232	0.567295			2.59	0.760302	2.62795	0.599481	0.737766
2.59333	0.639025	4.61981	0.994391	0.565084			2.59333	0.76755	2.63425	0.601085	0.729311
2.59667	0.642731	4.62184	0.997033	0.564878			2.59667	0.760754	2.63856	0.599918	0.733636
2.6	0.643323	4.62668	1.00046	0.565578			2.6	0.763929	2.63141	0.602019	0.733847
2.60333	0.646209	4.63427	1.00338	0.565803			2.60333	0.772474	2.64469	0.597791	0.739128
2.60667	0.647026	4.64048	1.00076	0.569081			2.60667	0.766123	2.65207	0.590314	0.735078
2.61	0.651321	4.6433	0.997571	0.572094			2.61	0.766786	2.6504	0.594408	0.740337
2.61333	0.647842	4.64867	0.99678	0.571853			2.61333	0.773284	2.65777	0.593971	0.736023
2.61667	0.648515	4.6563	0.996809	0.572903			2.61667	0.771453	2.66174	0.591862	0.740758
2.62	0.648452	4.65743	0.997761	0.571936			2.62	0.776912	2.66219	0.597373	0.740083
2.62333	0.650467	4.66023	0.999741	0.569581			2.62333	0.778498	2.67067	0.595809	0.733854
2.62667	0.651049	4.66772	1.00627	0.568337			2.62667	0.779479	2.67496	0.599106	0.737583
2.63	0.656017	4.67639	1.00461	0.570378			2.63	0.771839	2.67275	0.593864	0.738052
2.63333	0.658312	4.67915	1.00467	0.570357			2.63333	0.780312	2.68287	0.597005	0.729311
2.63667	0.660724	4.6915	1.00191	0.569903			2.63667	0.780126	2.68337	0.596549	0.73882
2.64	0.661746	4.69884	1.00042	0.569882			2.64	0.77945	2.68508	0.597063	0.732188
2.64333	0.663661	4.70512	0.997627	0.572855			2.64333	0.785265	2.69784	0.596796	0.735321
2.64667	0.663506	4.70761	1.0019	0.572817			2.64667	0.790998	2.69832	0.596941	0.732707
2.65	0.665079	4.71783	1.00263	0.569933			2.65	0.78216	2.70284	0.597349	0.738143
2.65333	0.664924	4.71741	1.00115	0.569184			2.65333	0.785302	2.70885	0.59661	0.736285
2.65667	0.668966	4.71964	1.00033	0.568037			2.65667	0.787028	2.71111	0.592431	0.736936
2.66	0.671963	4.72347	0.999218	0.56643			2.66	0.792393	2.71317	0.598035	0.735889
2.66333	0.673968	4.72904	1.00013	0.565273			2.66333	0.794393	2.71924	0.597739	0.73452
2.66667	0.673797	4.73206	0.999646	0.565514			2.66667	0.796585	2.72144	0.595532	0.730473
2.67	0.676826	4.74184	1.00205	0.567953			2.67	0.802847	2.73241	0.595445	0.73302
2.67333	0.678245	4.74931	1.00362	0.571613			2.67333	0.801274	2.73124	0.596753	0.735542
2.67667	0.678228	4.75304	1.00463	0.569317			2.67667	0.798307	2.73152	0.596281	0.733777
2.68	0.67949	4.75697	1.00424	0.567924			2.68	0.801367	2.74	0.599728	0.737543
2.68333	0.682145	4.76432	1.00462	0.565727			2.68333	0.802904	2.74344	0.594337	0.731879
2.68667	0.681717	4.7684	1.00576	0.562017			2.68667	0.80538	2.7411	0.591639	0.736009
2.69	0.682722	4.7749	1.00824	0.559007			2.69	0.807026	2.75091	0.599292	0.736899
2.69333	0.684452	4.77974	1.00993	0.559795			2.69333	0.81281	2.75565	0.601928	0.731415
2.69667	0.68604	4.78856	1.00897	0.55934			2.69667	0.811832	2.74994	0.593357	0.731236
2.7	0.688113	4.79399	1.01377	0.559535			2.7	0.816553	2.7619	0.590923	0.740422
2.70333	0.691302	4.80157	1.01428	0.561099			2.70333	0.81167	2.76468	0.597533	0.729853
2.70667	0.692065	4.80658	1.01483	0.562537			2.70667	0.816396	2.76403	0.597954	0.734088
2.71	0.690933	4.81141	1.01389	0.563269			2.71	0.822103	2.77428	0.59798	0.734261
2.71333	0.69341	4.81501	1.01786	0.563889			2.71333	0.812539	2.77695	0.594638	0.732686
2.71667	0.693281	4.82169	1.0138	0.566493			2.71667	0.821102	2.78098	0.596918	0.735915
2.72	0.695335	4.8244	1.01181	0.565234			2.72	0.821219	2.78122	0.600662	0.736989
2.72333	0.696053	4.83418	1.00982	0.562752			2.72333	0.826864	2.78974	0.596971	0.740648
2.72667	0.697789	4.8408	1.00923	0.56283			2.72667	0.826066	2.79206	0.598216	0.733421
2.73	0.699539	4.8489	1.00475	0.564939			2.73	0.831557	2.79255	0.596651	0.736252
2.73333	0.702499	4.85468	1.00662	0.566547			2.73333	0.830872	2.79914	0.601222	0.731548
2.73667	0.703551	4.86284	1.00828	0.568669			2.73667	0.833955	2.79974	0.598672	0.735524
2.74	0.704873	4.86487	1.00991	0.570411			2.74	0.833823	2.80328	0.599594	0.72993
2.74333	0.706277	4.87122	1.01002	0.569473			2.74333	0.832998	2.81001	0.595209	0.731519
2.74667	0.707809	4.87521	1.01234	0.567377			2.74667	0.837254	2.81408	0.592418	0.732168
2.75	0.709723	4.87594	1.01319	0.565861			2.75	0.841105	2.82105	0.59583	0.738534
2.75333	0.710207	4.88511	1.0148	0.566496			2.75333	0.839929	2.81274	0.594658	0.727298
2.75667	0.711261	4.89202	1.01505	0.565876			2.75667	0.844237	2.82349	0.591601	0.732202
2.76	0.712695	4.89913	1.01868	0.56603			2.76	0.844643	2.82775	0.596792	0.733699
2.76333	0.714077	4.9031	1.02047	0.565593			2.76333	0.843877	2.82835	0.594735	0.730558
2.76667	0.712268	4.9113	1.02147	0.567643			2.76667	0.842611	2.83715	0.599659	0.729504
2.77	0.714555	4.91343	1.02372	0.566658			2.77	0.844293	2.83816	0.59715	0.730831
2.77333	0.715155	4.91721	1.02587	0.565451			2.77333	0.85125	2.83892	0.594327	0.733569
2.77667	0.718633	4.92216	1.02273	0.565133			2.77667	0.843035	2.84062	0.596558	0.73176
2.78	0.721058	4.92652	1.02147	0.565183			2.78	0.848466	2.85023	0.596215	0.728672
2.78333	0.723959	4.93289	1.02245	0.561369			2.78333	0.856023	2.85331	0.596318	0.728507
2.78667	0.724504	4.93941	1.01863	0.560713			2.78667	0.857685	2.85735	0.599394	0.729669
2.79	0.726487	4.94396	1.01774	0.561449			2.79	0.864655	2.86	0.59441	0.726615
2.79333	0.728284	4.94453	1.0234	0.561699			2.79333	0.859938	2.865	0.593882	0.735413
2.79667	0.726622	4.94864	1.02267	0.562782			2.79667	0.859181	2.87069	0.600983	0.732181
2.8	0.727807	4.95106	1.0209	0.563785			2.8	0.860492	2.86639	0.598369	0.724819
2.80333	0.728985	4.95573	1.02474	0.563331			2.80333	0.863483	2.87854	0.595529	0.723778
2.80667	0.730375	4.96282	1.02302	0.565189			2.80667	0.861627	2.87865	0.596586	0.727305
2.81	0.732477	4.96983	1.01939	0.565927			2.81	0.864007	2.88511	0.596713	0.732714
2.81333	0.735348	4.9774	1.01926	0.565447			2.81333	0.868244	2.88513	0.592407	0.728214
2.81667	0.736458	4.98489	1.0179	0.566653			2.81667	0.866127	2.88907	0.596493	0.728952
2.82	0.737821	4.9911	1.01379	0.567093			2.82	0.871234	2.89437	0.597677	0.73152
2.82333	0.739381	4.99157	1.01604	0.562963			2.82333	0.876551	2.89201	0.593496	0.730781
2.82667	0.74179	4.99647	1.0191	0.560591			2.82667	0.875378	2.90003	0.597474	0.724937
2.83	0.741887	5.00031	1.02044	0.56409			2.83	0.87763	2.90308	0.595732	0.726745
2.83333	0.743696	5.00539	1.02073	0.561708			2.83333	0.878052	2.91149	0.597553	0.725193
2.83667	0.745221	5.00754	1.02576	0.560242			2.83667	0.874671	2.90552	0.59425	0.726153
2.84	0.746373	5.01422	1.02704	0.563638			2.84	0.877133	2.91606	0.601009	0.726796
2.84333	0.747346	5.02001	1.02458	0.565171			2.84333	0.881001	2.91067	0.593585	0.730625
2.84667	0.749501	5.02298	1.02717	0.561866			2.84667	0.877777	2.92136	0.594858	0.730102
2.85	0.752152	5.02557	1.02728	0.561613			2.85	0.886949	2.93132	0.597516	0.728198
2.85333	0.75513	5.03022	1.02375	0.560469			2.85333	0.882021	2.93174	0.598727	0.729276
2.85667	0.758073	5.03603	1.02482	0.558735			2.85667	0.88735	2.92864	0.596818	0.729431
2.86	0.757154	5.04119	1.0274	0.553666			2.86	0.886826	2.93789	0.601503	0.726451
2.86333	0.759596	5.0486	1.02422	0.553501			2.86333	0.896517	2.94128	0.597156	0.727734
2.86667	0.760251	5.05423	1.02629	0.554666			2.86667	0.889219	2.94802	0.590888	0.728753
2.87	0.762154	5.06019	1.02671	0.552287			2.87	0.888518	2.94488	0.592947	0.726161
2.87333	0.762816	5.06429	1.02556	0.550794			2.87333	0.894643	2.94613	0.598103	0.723995
2.87667	0.76504	5.06737	1.02207	0.555248			2.87667	0.895307	2.94706	0.593282	0.723453
2.88	0.765677	5.07215	1.02027	0.554059			2.88	0.893626	2.95789	0.600162	0.722524
2.88333	0.766354	5.07426	1.01772	0.555892			2.88333	0.895341	2.95626	0.594038	0.722588
2.88667	0.765184	5.07908	1.02345	0.561513			2.88667	0.899726	2.95622	0.596613	0.721843
2.89	0.76796	5.08227	1.02296	0.565223			2.89	0.901169	2.95939	0.593968	0.722515
2.89333	0.771212	5.0888	1.02422	0.566549			2.89333	0.904133	2.96225	0.595352	0.726113
2.89667	0.774117	5.09102	1.02511	0.565877			2.89667	0.908735	2.97267	0.594145	0.726109
2.9	0.776095	5.0989	1.0277	0.562689			2.9	0.907122	2.97153	0.595499	0.724388
2.90333	0.777317	5.10122	1.02411	0.559434			2.90333	0.911525	2.97916	0.597591	0.728552
2.90667	0.776909	5.10722	1.02116	0.557738			2.90667	0.909732	2.98202	0.599885	0.725556
2.91	0.777201	5.11186	1.02339	0.555097			2.91	0.91271	2.97796	0.591093	0.728237
2.91333	0.777076	5.11464	1.02575	0.557448			2.91333	0.912438	2.992	0.59756	0.723997
2.91667	0.78034	5.11881	1.02513	0.560811			2.91667	0.913276	2.98829	0.595748	0.731372
2.92	0.782954	5.12376	1.02688	0.562566			2.92	0.920645	2.98886	0.593268	0.72539
2.92333	0.786183	5.12731	1.02759	0.564105			2.92333	0.913985	2.99486	0.593207	0.724619
2.92667	0.790096	5.12845	1.02659	0.5619			2.92667	0.916902	3.00189	0.600175	0.726271
2.93	0.792694	5.1363	1.02672	0.560174			2.93	0.922094	3.00722	0.598912	0.719913
2.93333	0.79341	5.13926	1.02714	0.553675			2.93333	0.929041	3.00534	0.592321	0.72312
2.93667	0.794651	5.14332	1.02573	0.55215			2.93667	0.925795	3.0098	0.597815	0.72346
2.94	0.797337	5.14691	1.03087	0.551579			2.94	0.927344	3.01096	0.595005	0.724148
2.94333	0.79536	5.1495	1.03029	0.553239			2.94333	0.928516	3.018	0.595061	0.72271
2.94667	0.795418	5.14942	1.03075	0.552032			2.94667	0.932146	3.02276	0.592641	0.72326
2.95	0.796264	5.15493	1.0303	0.554715			2.95	0.931839	3.02588	0.599261	0.722382
2.95333	0.796541	5.16027	1.02907	0.554775			2.95333	0.932503	3.03311	0.590948	0.72165
2.95667	0.796981	5.16645	1.02822	0.551025			2.95667	0.934448	3.02928	0.596117	0.721387
2.96	0.798053	5.1744	1.0281	0.550953			2.96	0.937343	3.03117	0.592212	0.724853
2.96333	0.800902	5.18242	1.02986	0.552505			2.96333	0.938544	3.0342	0.593135	0.726261
2.96667	0.803123	5.18889	1.0321	0.556239			2.96667	0.939068	3.03829	0.592049	0.724818
2.97	0.806474	5.19229	1.03329	0.555579			2.97	0.938476	3.0484	0.592548	0.722681
2.97333	0.80589	5.19584	1.02847	0.560126			2.97333	0.942883	3.0448	0.591238	0.722977
2.97667	0.80725	5.19754	1.02805	0.558995			2.97667	0.942913	3.05533	0.593592	0.724859
2.98	0.807719	5.19984	1.0259	0.556507			2.98	0.945386	3.06001	0.594096	0.721524
2.98333	0.808405	5.20225	1.02352	0.556215			2.98333	0.945239	3.05206	0.595825	0.723705
2.98667	0.81059	5.20786	1.02632	0.558084			2.98667	0.949887	3.05988	0.593884	0.72473
2.99	0.813641	5.21069	1.03071	0.557753			2.99	0.950243	3.05884	0.596319	0.727101
2.99333	0.813926	5.21705	1.03229	0.557722			2.99333	0.946522	3.06416	0.594399	0.720433
2.99667	0.816702	5.22403	1.03276	0.560247			2.99667	0.954184	3.06837	0.597151	0.717914
3	0.817364	5.22545	1.03639	0.554642			3	0.953043	3.06959	0.59329	0.725004
3.00333	0.815772	5.22938	1.03571	0.553794			3.00333	0.951838	3.07434	0.590609	0.723185
3.00667	0.815853	5.23528	1.03304	0.549416			3.00667	0.954512	3.07677	0.590108	0.717016
3.01	0.822556	5.23854	1.03309	0.552091			3.01	0.958023	3.08092	0.600948	0.723997
3.01333	0.822753	5.2401	1.03384	0.551455			3.01333	0.960452	3.08547	0.594978	0.72651
3.01667	0.824611	5.24599	1.03169	0.55199			3.01667	0.960949	3.08544	0.593823	0.720359
3.02	0.827691	5.24993	1.03019	0.551873			3.02	0.964368	3.09085	0.592279	0.725301
3.02333	0.829852	5.25001	1.03156	0.554111			3.02333	0.96272	3.09042	0.591674	0.71737
3.02667	0.828652	5.25287	1.03076	0.55058			3.02667	0.964431	3.09668	0.588989	0.721032
3.03	0.830319	5.25721	1.03014	0.552133			3.03	0.96594	3.09506	0.588261	0.718973
3.03333	0.833269	5.26084	1.03003	0.555157			3.03333	0.974655	3.09957	0.589749	0.722286
3.03667	0.836062	5.26303	1.03631	0.556758			3.03667	0.968598	3.10366	0.594836	0.715918
3.04	0.838474	5.26611	1.03667	0.557853			3.04	0.974622	3.11093	0.593331	0.72112
3.04333	0.839798	5.26645	1.03933	0.559618			3.04333	0.968552	3.11348	0.589404	0.716557
3.04667	0.840871	5.26721	1.04054	0.558443			3.04667	0.969258	3.11431	0.592558	0.71883
3.05	0.840531	5.27291	1.04137	0.557131			3.05	0.981012	3.11533	0.589395	0.717583
3.05333	0.841814	5.27572	1.0382	0.554241			3.05333	0.972911	3.11817	0.590238	0.711355
3.05667	0.842841	5.27838	1.04063	0.552436			3.05667	0.976852	3.1165	0.584541	0.717613
3.06	0.845531	5.28644	1.03977	0.554981			3.06	0.979505	3.12145	0.5914	0.715
3.06333	0.847665	5.2929	1.03757	0.555743			3.06333	0.97983	3.12346	0.592417	0.717035
3.06667	0.850696	5.296	1.04138	0.552926			3.06667	0.984874	3.12874	0.594555	0.7183
3.07	0.85077	5.30245	1.04195	0.552413			3.07	0.985983	3.13305	0.587229	0.715726
3.07333	0.852247	5.30977	1.04106	0.551151			3.07333	0.985044	3.13615	0.592092	0.72038
3.07667	0.855033	5.31123	1.04363	0.548046			3.07667	0.987983	3.1368	0.59053	0.718347
3.08	0.857453	5.31393	1.0448	0.54316			3.08	0.98974	3.14578	0.591742	0.715208
3.08333	0.857352	5.31617	1.04125	0.548297			3.08333	0.989798	3.14482	0.59079	0.715023
3.08667	0.860725	5.31675	1.03971	0.548154			3.08667	0.990432	3.14976	0.588359	0.717979
3.09	0.863077	5.31921	1.04011	0.551706			3.09	0.992894	3.14812	0.594851	0.719018
3.09333	0.863736	5.32389	1.03567	0.551778			3.09333	0.997627	3.15392	0.585851	0.717776
3.09667	0.862317	5.32793	1.03738	0.555235			3.09667	0.991652	3.15203	0.592524	0.714041
3.1	0.86576	5.33543	1.03889	0.555441			3.1	0.99824	3.16145	0.592861	0.720634
3.10333	0.866614	5.34154	1.04019	0.556893			3.10333	1.00378	3.16324	0.59436	0.71368
3.10667	0.866568	5.34667	1.04278	0.55627			3.10667	0.998256	3.15923	0.59429	0.715137
3.11	0.867219	5.34965	1.04342	0.553548			3.11	1.0001	3.17019	0.591082	0.714848
3.11333	0.870125	5.35511	1.04491	0.551075			3.11333	1.00686	3.16999	0.588626	0.719643
3.11667	0.871538	5.35605	1.0441	0.547015			3.11667	1.00529	3.17888	0.588452	0.717977
3.12	0.870058	5.35854	1.044	0.546567			3.12	1.00573	3.17939	0.591994	0.718067
3.12333	0.873007	5.36199	1.04173	0.544673			3.12333	1.01007	3.18191	0.592484	0.718641
3.12667	0.8771	5.36582	1.04486	0.546237			3.12667	1.0113	3.17945	0.593365	0.713932
3.13	0.878573	5.3667	1.0452	0.546446			3.13	1.01221	3.18703	0.590345	0.71439
3.13333	0.878568	5.36758	1.04667	0.551169			3.13333	1.01669	3.18958	0.590349	0.717328
3.13667	0.882781	5.3702	1.04424	0.552255			3.13667	1.00835	3.19178	0.591087	0.713714
3.14	0.881585	5.36885	1.04467	0.552542			3.14	1.01947	3.19302	0.591324	0.715068
3.14333	0.88216	5.37408	1.04242	0.555375			3.14333	1.01856	3.19885	0.588585	0.711414
3.14667	0.882758	5.3788	1.04135	0.555456			3.14667	1.01742	3.19616	0.588776	0.716132
3.15	0.885988	5.38549	1.04028	0.550769			3.15	1.01741	3.20038	0.589597	0.715984
3.15333	0.887049	5.38921	1.04099	0.549543			3.15333	1.01582	3.20397	0.591898	0.715229
3.15667	0.890403	5.39464	1.04005	0.548293			3.15667	1.02527	3.20598	0.588667	0.709964
3.16	0.893356	5.39742	1.04233	0.546574			3.16	1.02202	3.21102	0.586706	0.71062
3.16333	0.896732	5.40028	1.04252	0.547927			3.16333	1.03027	3.21503	0.591267	0.716569
3.16667	0.897408	5.40479	1.04478	0.550584			3.16667	1.02665	3.21528	0.588468	0.712291
3.17	0.897844	5.41031	1.04425	0.553512			3.17	1.03294	3.21729	0.582609	0.71359
3.17333	0.898698	5.41751	1.04572	0.556435			3.17333	1.02702	3.22259	0.588356	0.71489
3.17667	0.898711	5.41919	1.045	0.555944			3.17667	1.0325	3.22298	0.591325	0.714845
3.18	0.899652	5.42279	1.04408	0.555424			3.18	1.0347	3.23004	0.58072	0.715639
3.18333	0.901007	5.42496	1.04465	0.553491			3.18333	1.03538	3.2256	0.588023	0.714584
3.18667	0.90351	5.4276	1.04411	0.550376			3.18667	1.03783	3.23483	0.589457	0.71039
3.19	0.903676	5.42958	1.04225	0.546087			3.19	1.03548	3.2285	0.59	0.707759
3.19333	0.905407	5.43417	1.04294	0.547758			3.19333	1.04135	3.24208	0.584436	0.715237
3.19667	0.906967	5.4348	1.04533	0.548726			3.19667	1.04401	3.24423	0.5878	0.707738
3.2	0.905634	5.43904	1.04369	0.549871			3.2	1.04264	3.24688	0.583916	0.712856
3.20333	0.906674	5.44262	1.04598	0.551634			3.20333	1.04252	3.24007	0.586974	0.714258
3.20667	0.909322	5.44351	1.04683	0.552652			3.20667	1.04567	3.24726	0.587072	0.712733
3.21	0.910823	5.44332	1.04542	0.551773			3.21	1.04486	3.25285	0.581545	0.715715
3.21333	0.911888	5.44771	1.04589	0.551471			3.21333	1.04631	3.25001	0.586998	0.716341
3.21667	0.91639	5.4521	1.04593	0.550774			3.21667	1.05174	3.25657	0.586918	0.717194
3.22	0.920179	5.45145	1.04782	0.547875			3.22	1.05225	3.25842	0.584023	0.7086
3.22333	0.922787	5.45596	1.04807	0.548584			3.22333	1.05358	3.25847	0.585283	0.707907
3.22667	0.925047	5.46134	1.05157	0.546463			3.22667	1.05399	3.26543	0.583387	0.708498
3.23	0.926431	5.46305	1.05068	0.544842			3.23	1.05094	3.26398	0.589909	0.718854
3.23333	0.928133	5.46424	1.05228	0.54556			3.23333	1.05365	3.26738	0.587672	0.713521
3.23667	0.927254	5.46732	1.05239	0.54359			3.23667	1.05567	3.26575	0.587807	0.707589
3.24	0.92849	5.46857	1.05193	0.544337			3.24	1.05652	3.27403	0.587627	0.711071
3.24333	0.928968	5.47385	1.04865	0.545118			3.24333	1.06246	3.27826	0.585778	0.712212
3.24667	0.929597	5.47976	1.04705	0.546831			3.24667	1.05916	3.27805	0.587209	0.712195
3.25	0.929974	5.48563	1.04504	0.547113			3.25	1.06362	3.28187	0.583733	0.71213
3.25333	0.931191	5.49276	1.04419	0.548889			3.25333	1.06554	3.28475	0.590488	0.703044
3.25667	0.935368	5.49756	1.04389	0.547814			3.25667	1.06298	3.2875	0.589288	0.710823
3.26	0.937169	5.49942	1.04149	0.546721			3.26	1.06862	3.2883	0.591601	0.71107
3.26333	0.939282	5.49935	1.04227	0.545668			3.26333	1.05764	3.28961	0.58633	0.71585
3.26667	0.941031	5.50095	1.0419	0.544706			3.26667	1.06741	3.29167	0.585973	0.715277
3.27	0.942732	5.50247	1.0417	0.544796			3.27	1.06881	3.30016	0.585914	0.710873
3.27333	0.941061	5.50552	1.04242	0.545428			3.27333	1.06881	3.29229	0.589677	0.706882
3.27667	0.945507	5.50672	1.04094	0.547601			3.27667	1.07247	3.3013	0.579497	0.706634
3.28	0.945545	5.5118	1.04221	0.547046			3.28	1.07504	3.30554	0.588615	0.708144
3.28333	0.947294	5.51492	1.04055	0.545535			3.28333	1.07707	3.29918	0.588206	0.711344
3.28667	0.950864	5.51731	1.04183	0.544531			3.28667	1.0795	3.30809	0.584136	0.706776
3.29	0.95373	5.51863	1.03799	0.541297			3.29	1.08035	3.31392	0.586888	0.709073
3.29333	0.952035	5.52161	1.04159	0.53974			3.29333	1.07383	3.31833	0.584169	0.70385
3.29667	0.954022	5.5229	1.04059	0.541829			3.29667	1.08234	3.31401	0.586085	0.707132
3.3	0.955937	5.52659	1.04322	0.540302			3.3	1.0801	3.31799	0.5825	0.70907
3.30333	0.955463	5.52946	1.04115	0.541462			3.30333	1.08995	3.31725	0.581407	0.708308
3.30667	0.954552	5.53224	1.0448	0.543707			3.30667	1.08976	3.32118	0.582071	0.712357
3.31	0.957461	5.5324	1.04651	0.542569			3.31	1.08735	3.32315	0.589255	0.709441
3.31333	0.959738	5.53618	1.04659	0.540117			3.31333	1.0849	3.32906	0.584051	0.710831
3.31667	0.959121	5.53653	1.04767	0.543385			3.31667	1.08993	3.3265	0.585255	0.707294
3.32	0.959742	5.53688	1.04915	0.54487			3.32	1.09365	3.32921	0.585168	0.714378
3.32333	0.964497	5.5393	1.04974	0.545891			3.32333	1.09305	3.34036	0.588253	0.699288
3.32667	0.964373	5.54326	1.04683	0.547562			3.32667	1.09156	3.3329	0.587094	0.707478
3.33	0.967346	5.54462	1.0487	0.549918			3.33	1.09787	3.33769	0.581694	0.71025
3.33333	0.970909	5.5503	1.05042	0.551			3.33333	1.09954	3.34255	0.58658	0.701236
3.33667	0.974836	5.55331	1.04857	0.548113			3.33667	1.1059	3.34533	0.582829	0.706485
3.34	0.973353	5.55793	1.0504	0.545706			3.34	1.09797	3.3433	0.583379	0.703592
3.34333	0.975982	5.56078	1.05409	0.544527			3.34333	1.09775	3.34788	0.585796	0.709341
3.34667	0.975471	5.56401	1.05229	0.542743			3.34667	1.10374	3.35166	0.579402	0.705367
3.35	0.976434	5.5646	1.04961	0.539076			3.35	1.10586	3.35094	0.581893	0.712413
3.35333	0.975443	5.5703	1.05381	0.539823			3.35333	1.10684	3.3531	0.582597	0.703752
3.35667	0.97829	5.57007	1.05299	0.538036			3.35667	1.10862	3.35998	0.578466	0.703977
3.36	0.981618	5.57092	1.05382	0.538106			3.36	1.10808	3.3515	0.584338	0.706707
3.36333	0.984846	5.57675	1.05498	0.536819			3.36333	1.10939	3.35863	0.583	0.707772
3.36667	0.986546	5.58147	1.05525	0.538385			3.36667	1.11013	3.36708	0.585662	0.712586
3.37	0.988859	5.58093	1.05376	0.540029			3.37	1.11118	3.36555	0.583609	0.709039
3.37333	0.991424	5.58585	1.05477	0.541965			3.37333	1.11129	3.36488	0.583201	0.701559
3.37667	0.989803	5.58985	1.05592	0.543934			3.37667	1.11982	3.37007	0.584336	0.703532
3.38	0.989619	5.59005	1.05678	0.545087			3.38	1.12003	3.37498	0.581726	0.703946
3.38333	0.991456	5.58917	1.05613	0.544267			3.38333	1.11856	3.37934	0.585232	0.70577
3.38667	0.993956	5.5929	1.05597	0.540702			3.38667	1.12494	3.37985	0.585651	0.70325
3.39	0.993671	5.59699	1.0568	0.541492			3.39	1.11957	3.37748	0.582124	0.705081
3.39333	0.995401	5.59963	1.05376	0.538716			3.39333	1.1244	3.37753	0.580253	0.708133
3.39667	0.998499	5.60188	1.05213	0.538746			3.39667	1.12569	3.38245	0.582685	0.707188
3.4	0.998184	5.60577	1.05187	0.538188			3.4	1.12405	3.38532	0.58185	0.705103
3.40333	0.999296	5.60689	1.0512	0.541011			3.40333	1.12562	3.38841	0.582114	0.700039
3.40667	1.00158	5.60922	1.04778	0.53981			3.40667	1.13031	3.38564	0.583865	0.702809
3.41	1.00372	5.6102	1.04998	0.539785			3.41	1.13037	3.3919	0.576959	0.707585
3.41333	1.00601	5.61192	1.0508	0.53778			3.41333	1.12977	3.39256	0.579537	0.705486
3.41667	1.00776	5.61311	1.05221	0.536041			3.41667	1.13238	3.39536	0.579849	0.70514
3.42	1.00875	5.61667	1.05163	0.535845			3.42	1.13334	3.39619	0.585878	0.69924
3.42333	1.00971	5.6159	1.05367	0.53549			3.42333	1.13527	3.40468	0.585164	0.702694
3.42667	1.01092	5.62094	1.05369	0.537051			3.42667	1.13943	3.39738	0.582535	0.705177
3.43	1.01144	5.62403	1.05678	0.541216			3.43	1.14143	3.40912	0.581324	0.697969
3.43333	1.01263	5.6273	1.05528	0.541324			3.43333	1.14031	3.40056	0.578864	0.700962
3.43667	1.01596	5.62795	1.05611	0.541222			3.43667	1.1435	3.40868	0.581419	0.70174
3.44	1.01823	5.62877	1.05627	0.545786			3.44	1.13836	3.40947	0.583	0.699951
3.44333	1.01963	5.63075	1.05405	0.545427			3.44333	1.14642	3.41506	0.580515	0.699686
3.44667	1.02023	5.6322	1.05226	0.544121			3.44667	1.14802	3.41519	0.578759	0.702921
3.45	1.02437	5.6349	1.05676	0.546973			3.45	1.1476	3.4233	0.581874	0.703967
3.45333	1.02434	5.63834	1.05615	0.547352			3.45333	1.1503	3.41616	0.58324	0.703596
3.45667	1.02608	5.64286	1.05627	0.544766			3.45667	1.15039	3.41445	0.584408	0.704496
3.46	1.02832	5.64472	1.05476	0.546056			3.46	1.14188	3.41538	0.579442	0.702779
3.46333	1.0297	5.64708	1.05225	0.544992			3.46333	1.15464	3.42581	0.583678	0.700449
3.46667	1.02951	5.65078	1.0501	0.544978			3.46667	1.15022	3.42733	0.578952	0.703698
3.47	1.03118	5.65494	1.04871	0.545442			3.47	1.15809	3.42852	0.581083	0.699213
3.47333	1.03264	5.65756	1.04822	0.544355			3.47333	1.15875	3.4324	0.578452	0.699671
3.47667	1.03346	5.66088	1.05023	0.543636			3.47667	1.15776	3.43848	0.578465	0.698357
3.48	1.03514	5.66401	1.05262	0.546119			3.48	1.15503	3.43823	0.584243	0.701487
3.48333	1.03773	5.66652	1.0501	0.544953			3.48333	1.16063	3.43896	0.578462	0.700678
3.48667	1.03722	5.66893	1.0537	0.544734			3.48667	1.16002	3.43644	0.581447	0.702357
3.49	1.04117	5.67063	1.05245	0.545841			3.49	1.16075	3.43953	0.577581	0.696923
3.49333	1.04078	5.67039	1.05663	0.545168			3.49333	1.16423	3.44484	0.578082	0.700923
3.49667	1.04236	5.67241	1.05493	0.543578			3.49667	1.1633	3.45015	0.578775	0.69576
3.5	1.04305	5.67397	1.05818	0.543803			3.5	1.16401	3.4468	0.577997	0.699788
3.50333	1.04533	5.6736	1.05485	0.541743			3.50333	1.16381	3.44767	0.572447	0.699925
3.50667	1.0448	5.67728	1.05699	0.54192			3.50667	1.16874	3.44951	0.575167	0.696575
3.51	1.04899	5.67709	1.05489	0.541677			3.51	1.17483	3.455	0.576983	0.697617
3.51333	1.05	5.67771	1.05418	0.542049			3.51333	1.16923	3.45793	0.576578	0.698151
3.51667	1.05296	5.68007	1.05129	0.541329			3.51667	1.16906	3.45582	0.57858	0.699206
3.52	1.05584	5.68241	1.05191	0.542053			3.52	1.17339	3.45637	0.576234	0.699859
3.52333	1.05638	5.68202	1.04968	0.541782			3.52333	1.17618	3.46473	0.584096	0.699601
3.52667	1.05941	5.68725	1.05049	0.541138			3.52667	1.17645	3.46584	0.57512	0.69633
3.53	1.06125	5.69113	1.05129	0.539681			3.53	1.17534	3.46597	0.573198	0.698262
3.53333	1.06001	5.69221	1.0519	0.536638			3.53333	1.18251	3.46991	0.575449	0.696738
3.53667	1.0605	5.69357	1.05395	0.538228			3.53667	1.17857	3.4708	0.575683	0.695962
3.54	1.06261	5.6969	1.05659	0.535795			3.54	1.18416	3.46977	0.584732	0.69653
3.54333	1.06217	5.70156	1.05649	0.536208			3.54333	1.17581	3.47754	0.58	0.699105
3.54667	1.06488	5.70346	1.05944	0.537669			3.54667	1.18755	3.47791	0.575856	0.70262
3.55	1.06712	5.70589	1.05885	0.539782			3.55	1.18106	3.47623	0.576662	0.695772
3.55333	1.07042	5.71159	1.05838	0.537035			3.55333	1.18333	3.48099	0.577849	0.694676
3.55667	1.07312	5.71088	1.05886	0.535956			3.55667	1.19259	3.47598	0.576523	0.698107
3.56	1.07545	5.70959	1.0574	0.536428			3.56	1.18967	3.48264	0.575343	0.697676
3.56333	1.07731	5.7109	1.0543	0.533493			3.56333	1.18962	3.48742	0.575166	0.692634
3.56667	1.07912	5.71264	1.05854	0.53275			3.56667	1.19194	3.48532	0.574072	0.693266
3.57	1.08174	5.71133	1.05713	0.533618			3.57	1.18977	3.48471	0.580828	0.698369
3.57333	1.08216	5.71383	1.05589	0.535524			3.57333	1.19967	3.49645	0.577118	0.696873
3.57667	1.08164	5.71722	1.05405	0.533843			3.57667	1.19428	3.49001	0.574925	0.691807
3.58	1.08126	5.71808	1.05523	0.535253			3.58	1.19979	3.49843	0.575247	0.697629
3.58333	1.08252	5.72408	1.05211	0.535997			3.58333	1.19796	3.49273	0.569273	0.693977
3.58667	1.08188	5.72535	1.05652	0.536311			3.58667	1.19889	3.49539	0.578349	0.698357
3.59	1.08433	5.72744	1.05572	0.537225			3.59	1.20476	3.49642	0.571706	0.702157
3.59333	1.08645	5.72977	1.05968	0.538384			3.59333	1.20402	3.50908	0.575235	0.688568
3.59667	1.08946	5.73012	1.05853	0.535881			3.59667	1.20826	3.50591	0.578075	0.693368
3.6	1.09304	5.72794	1.06202	0.536368			3.6	1.21546	3.50405	0.5721	0.697213
3.60333	1.09406	5.73137	1.06028	0.535214			3.60333	1.2058	3.51147	0.57534	0.699105
3.60667	1.09558	5.7337	1.06179	0.53501			3.60667	1.20106	3.50529	0.578121	0.695602
3.61	1.09626	5.73376	1.0598	0.532417			3.61	1.21302	3.51204	0.572145	0.698295
3.61333	1.09534	5.73707	1.06053	0.53602			3.61333	1.21099	3.51423	0.578438	0.694228
3.61667	1.09606	5.73788	1.05803	0.535503			3.61667	1.21613	3.51297	0.579515	0.698986
3.62	1.0991	5.7398	1.05764	0.534319			3.62	1.21063	3.5174	0.572822	0.693609
3.62333	1.09852	5.74107	1.05698	0.534254			3.62333	1.21054	3.52254	0.565623	0.699486
3.62667	1.10105	5.7425	1.05797	0.5383			3.62667	1.21758	3.5157	0.580113	0.693603
3.63	1.10296	5.74503	1.06009	0.537986			3.63	1.21274	3.51609	0.580203	0.693243
3.63333	1.10299	5.74744	1.06037	0.538795			3.63333	1.21539	3.52282	0.572955	0.693969
3.63667	1.10261	5.74665	1.05845	0.540929			3.63667	1.21772	3.52735	0.571808	0.699373
3.64	1.10731	5.75162	1.05793	0.541144			3.64	1.21656	3.53104	0.570506	0.691792
3.64333	1.109	5.75722	1.0583	0.539306			3.64333	1.22415	3.52669	0.574482	0.698305
3.64667	1.11311	5.75976	1.05669	0.53828			3.64667	1.2193	3.52574	0.570939	0.695867
3.65	1.1165	5.7666	1.05814	0.53774			3.65	1.22519	3.52762	0.579621	0.689985
3.65333	1.11723	5.77101	1.05969	0.538009			3.65333	1.22087	3.54213	0.576297	0.693612
3.65667	1.11756	5.77197	1.06132	0.537937			3.65667	1.22892	3.5363	0.572963	0.693501
3.66	1.11862	5.77236	1.05732	0.538733			3.66	1.23058	3.54257	0.571389	0.694191
3.66333	1.11923	5.77231	1.057	0.536406			3.66333	1.22882	3.53981	0.575909	0.690816
3.66667	1.12009	5.77217	1.05664	0.538311			3.66667	1.23261	3.54449	0.570471	0.692432
3.67	1.12265	5.77322	1.05732	0.537895			3.67	1.23308	3.5473	0.575956	0.691477
3.67333	1.12373	5.77412	1.05977	0.536165			3.67333	1.23418	3.53793	0.574789	0.689311
3.67667	1.12328	5.77584	1.06325	0.532534			3.67667	1.23133	3.54463	0.571656	0.694039
3.68	1.12416	5.77702	1.06441	0.533525			3.68	1.23332	3.54503	0.573256	0.69613
3.68333	1.12371	5.77684	1.06682	0.531115			3.68333	1.23753	3.55117	0.570228	0.695402
3.68667	1.1256	5.78007	1.06202	0.530157			3.68667	1.24103	3.54783	0.568408	0.695974
3.69	1.12987	5.78132	1.06589	0.529827			3.69	1.23927	3.54949	0.572639	0.690045
3.69333	1.13105	5.78351	1.06005	0.530558			3.69333	1.2414	3.55412	0.567818	0.694309
3.69667	1.13239	5.78341	1.05962	0.531467			3.69667	1.24341	3.55949	0.572892	0.694827
3.7	1.13392	5.78694	1.0544	0.530337			3.7	1.24149	3.5688	0.571988	0.690258
3.70333	1.13519	5.78342	1.06062	0.532444			3.70333	1.2453	3.55996	0.571079	0.692208
3.70667	1.13515	5.78238	1.05229	0.533862			3.70667	1.24907	3.56988	0.570474	0.691049
3.71	1.13799	5.78175	1.05537	0.533781			3.71	1.25487	3.56591	0.575018	0.691697
3.71333	1.13944	5.78579	1.0544	0.530846			3.71333	1.2509	3.56121	0.570781	0.695467
3.71667	1.14229	5.78555	1.05839	0.530715			3.71667	1.24498	3.57017	0.566899	0.68826
3.72	1.14246	5.79157	1.0561	0.528292			3.72	1.24959	3.56342	0.57435	0.689291
3.72333	1.14369	5.7971	1.05807	0.528531			3.72333	1.25319	3.56876	0.568854	0.691135
3.72667	1.14803	5.79899	1.05911	0.530845			3.72667	1.25187	3.57556	0.572168	0.689133
3.73	1.1502	5.79945	1.05971	0.533868			3.73	1.2539	3.57364	0.56975	0.691223
3.73333	1.15071	5.80398	1.06059	0.533126			3.73333	1.25786	3.57463	0.572584	0.687726
3.73667	1.15279	5.80731	1.0621	0.536388			3.73667	1.25779	3.57518	0.575809	0.688879
3.74	1.15332	5.8078	1.06193	0.536174			3.74	1.25775	3.57837	0.570516	0.686381
3.74333	1.15394	5.80727	1.06198	0.53464			3.74333	1.26305	3.57375	0.569869	0.684717
3.74667	1.15485	5.80846	1.06455	0.534426			3.74667	1.2613	3.58109	0.570936	0.692491
3.75	1.15596	5.80802	1.0618	0.534925			3.75	1.26322	3.58034	0.571901	0.687219
3.75333	1.15863	5.80832	1.06293	0.532571			3.75333	1.26706	3.58598	0.575871	0.686989
3.75667	1.16311	5.80857	1.06506	0.533825			3.75667	1.26149	3.58361	0.57231	0.690179
3.76	1.16265	5.81251	1.06643	0.534393			3.76	1.2647	3.58616	0.569558	0.686027
3.76333	1.16691	5.81393	1.06826	0.534522			3.76333	1.26756	3.5847	0.570307	0.688411
3.76667	1.16993	5.8137	1.06932	0.535223			3.76667	1.2703	3.58794	0.569391	0.690571
3.77	1.17069	5.81483	1.06678	0.535984			3.77	1.26853	3.59486	0.567993	0.684638
3.77333	1.1699	5.81706	1.0652	0.534979			3.77333	1.27117	3.59392	0.567752	0.688053
3.77667	1.17314	5.818	1.06699	0.536072			3.77667	1.27399	3.59278	0.568967	0.688723
3.78	1.17088	5.82213	1.06448	0.536337			3.78	1.27172	3.59583	0.565143	0.689186
3.78333	1.17221	5.82548	1.06244	0.537999			3.78333	1.27453	3.59735	0.568155	0.691583
3.78667	1.17698	5.82866	1.06454	0.535622			3.78667	1.27764	3.59802	0.569703	0.681152
3.79	1.17975	5.83168	1.06792	0.535285			3.79	1.27464	3.59675	0.563074	0.688215
3.79333	1.17901	5.8334	1.06075	0.533782			3.79333	1.27725	3.60382	0.569754	0.691813
3.79667	1.18098	5.83829	1.05828	0.530454			3.79667	1.27659	3.60573	0.574161	0.688869
3.8	1.18098	5.84156	1.06418	0.529471			3.8	1.28291	3.6026	0.570322	0.69118
3.80333	1.18	5.84262	1.06416	0.531253			3.80333	1.28005	3.60789	0.567458	0.687618
3.80667	1.17955	5.84354	1.06114	0.529521			3.80667	1.28544	3.60544	0.570118	0.681843
3.81	1.18144	5.84643	1.06919	0.53009			3.81	1.28851	3.60525	0.564337	0.684905
3.81333	1.18249	5.8449	1.06896	0.529286			3.81333	1.28435	3.61025	0.573417	0.686525
3.81667	1.18599	5.84469	1.06936	0.529208			3.81667	1.29011	3.61378	0.568452	0.686451
3.82	1.18686	5.84762	1.0675	0.528505			3.82	1.28331	3.61676	0.568249	0.681513
3.82333	1.19146	5.84772	1.0623	0.531674			3.82333	1.2884	3.61678	0.565051	0.687849
3.82667	1.19316	5.85078	1.06324	0.528314			3.82667	1.29404	3.62263	0.564863	0.690507
3.83	1.19728	5.85059	1.06943	0.531431			3.83	1.28783	3.618	0.566915	0.683184
3.83333	1.19826	5.8532	1.06605	0.531717			3.83333	1.28936	3.62291	0.566536	0.682151
3.83667	1.20123	5.8549	1.06736	0.531014			3.83667	1.29094	3.63018	0.568644	0.685014
3.84	1.19986	5.85735	1.07202	0.526964			3.84	1.29098	3.62439	0.566048	0.683125
3.84333	1.20125	5.85966	1.07146	0.529774			3.84333	1.29592	3.62749	0.56491	0.685768
3.84667	1.20098	5.864	1.06774	0.529134			3.84667	1.29648	3.63009	0.567898	0.683695
3.85	1.20082	5.86529	1.06733	0.525753			3.85	1.29917	3.62662	0.564743	0.687907
3.85333	1.2003	5.86592	1.06536	0.525774			3.85333	1.30093	3.62943	0.565782	0.684324
3.85667	1.20388	5.8685	1.06572	0.524946			3.85667	1.30428	3.6327	0.564095	0.681246
3.86	1.20668	5.86793	1.06267	0.525053			3.86	1.30082	3.63218	0.568763	0.680657
3.86333	1.20942	5.86849	1.06489	0.522041			3.86333	1.3031	3.63503	0.567313	0.681511
3.86667	1.21053	5.87147	1.06527	0.524216			3.86667	1.30519	3.63739	0.569413	0.686308
3.87	1.21197	5.87087	1.06948	0.523915			3.87	1.30303	3.63694	0.565032	0.681808
3.87333	1.21154	5.87082	1.06711	0.523946			3.87333	1.30765	3.6335	0.559361	0.680717
3.87667	1.21208	5.87106	1.06878	0.523264			3.87667	1.31639	3.6332	0.565262	0.688911
3.88	1.21404	5.86989	1.06391	0.526132			3.88	1.30726	3.64051	0.566816	0.682679
3.88333	1.21676	5.86712	1.06244	0.528254			3.88333	1.31525	3.63794	0.565419	0.685408
3.88667	1.21948	5.87138	1.06188	0.53176			3.88667	1.31077	3.63886	0.568851	0.685912
3.89	1.22196	5.87678	1.06559	0.533329			3.89	1.31501	3.6505	0.563128	0.684748
3.89333	1.22503	5.87832	1.06397	0.533923			3.89333	1.31453	3.64869	0.561145	0.68358
3.89667	1.22354	5.88204	1.0659	0.534245			3.89667	1.31598	3.64537	0.567535	0.684117
3.9	1.22542	5.88569	1.06415	0.532783			3.9	1.31729	3.64912	0.562814	0.682701
3.90333	1.22576	5.88393	1.06407	0.52997			3.90333	1.31952	3.65126	0.561551	0.682312
3.90667	1.22806	5.88258	1.06603	0.53086			3.90667	1.32127	3.65161	0.557284	0.682855
3.91	1.23043	5.88236	1.06496	0.531402			3.91	1.31546	3.6453	0.563252	0.683718
3.91333	1.23116	5.88353	1.06303	0.528955			3.91333	1.32257	3.65746	0.563095	0.681827
3.91667	1.23273	5.88263	1.06599	0.530182			3.91667	1.32051	3.65555	0.559525	0.680579
3.92	1.23405	5.88542	1.06294	0.529808			3.92	1.32559	3.65738	0.568902	0.677528
3.92333	1.23588	5.88671	1.05962	0.530429			3.92333	1.32709	3.65562	0.564141	0.677495
3.92667	1.23311	5.89196	1.06203	0.526713			3.92667	1.324	3.66412	0.563925	0.681051
3.93	1.23583	5.89481	1.06637	0.528565			3.93	1.32454	3.66212	0.562034	0.685858
3.93333	1.23772	5.89921	1.06689	0.528454			3.93333	1.32795	3.66522	0.563868	0.679868
3.93667	1.23856	5.90231	1.0691	0.527279			3.93667	1.33083	3.66936	0.559758	0.682675
3.94	1.24011	5.90337	1.06772	0.527224			3.94	1.33404	3.66155	0.558429	0.683073
3.94333	1.24604	5.90452	1.06491	0.528271			3.94333	1.3286	3.66262	0.56095	0.676401
3.94667	1.24958	5.90383	1.06449	0.528142			3.94667	1.33623	3.67431	0.567312	0.679929
3.95	1.25112	5.90612	1.0642	0.528284			3.95	1.33664	3.66852	0.561091	0.678701
3.95333	1.25594	5.90813	1.06408	0.529536			3.95333	1.33426	3.67025	0.56044	0.681145
3.95667	1.25683	5.90703	1.06452	0.525746			3.95667	1.3322	3.6634	0.563882	0.684578
3.96	1.25552	5.9061	1.07049	0.52716			3.96	1.33173	3.6734	0.559345	0.678962
3.96333	1.25535	5.9097	1.06961	0.527182			3.96333	1.33897	3.67096	0.561185	0.681492
3.96667	1.25664	5.90624	1.07504	0.524335			3.96667	1.34324	3.67346	0.561175	0.680729
3.97	1.25541	5.90682	1.06882	0.522702			3.97	1.34201	3.67266	0.565543	0.67856
3.97333	1.25744	5.91246	1.06352	0.522194			3.97333	1.34428	3.67715	0.561423	0.679222
3.97667	1.25974	5.91341	1.06114	0.52018			3.97667	1.34747	3.67396	0.563558	0.679503
3.98	1.26188	5.91052	1.06131	0.519743			3.98	1.3437	3.68431	0.564173	0.679422
3.98333	1.26142	5.91541	1.0573	0.517301			3.98333	1.34471	3.6824	0.566278	0.676012
3.98667	1.26372	5.9127	1.06093	0.519066			3.98667	1.34993	3.68145	0.559889	0.675829
3.99	1.26611	5.90902	1.06837	0.520961			3.99	1.34838	3.68425	0.561552	0.680967
3.99333	1.26915	5.91021	1.06844	0.522522			3.99333	1.35225	3.69047	0.56114	0.677751
3.99667	1.27086	5.91524	1.06975	0.524272			3.99667	1.35322	3.68761	0.567493	0.678106
4	1.27368	5.91729	1.07049	0.527185			4	1.35232	3.68806	0.561359	0.675327
4.00333	1.27572	5.92382	1.06939	0.524756			4.00333	1.34967	3.69086	0.563692	0.681457
4.00667	1.27598	5.92933	1.06912	0.525074			4.00667	1.35356	3.69255	0.557901	0.673137
4.01	1.27598	5.9302	1.06716	0.525566			4.01	1.35246	3.69471	0.558941	0.678652
4.01333	1.27617	5.92965	1.06485	0.524814			4.01333	1.3582	3.69194	0.559766	0.679256
4.01667	1.2783	5.93005	1.06269	0.522492			4.01667	1.35858	3.69537	0.563418	0.677465
4.02	1.27888	5.92904	1.06706	0.524338			4.02	1.35851	3.69511	0.558991	0.67724
4.02333	1.28116	5.9305	1.06643	0.524078			4.02333	1.36396	3.69388	0.561512	0.679611
4.02667	1.28224	5.93182	1.06731	0.523885			4.02667	1.36147	3.69609	0.561729	0.674034
4.03	1.28435	5.93396	1.0682	0.52253			4.03	1.3597	3.70488	0.558169	0.67808
4.03333	1.28629	5.93678	1.06969	0.52232			4.03333	1.35842	3.70016	0.560029	0.675592
4.03667	1.28892	5.94019	1.06964	0.523776			4.03667	1.35795	3.69697	0.562276	0.67804
4.04	1.29068	5.93945	1.07156	0.52498			4.04	1.36969	3.70208	0.558265	0.683526
4.04333	1.29414	5.94044	1.07203	0.524777			4.04333	1.36582	3.70428	0.56221	0.674087
4.04667	1.29523	5.94403	1.07186	0.525718			4.04667	1.3695	3.70726	0.555559	0.675185
4.05	1.29506	5.9448	1.07189	0.528298			4.05	1.36564	3.70789	0.56209	0.679437
4.05333	1.29593	5.94475	1.067	0.526804			4.05333	1.36999	3.71054	0.555191	0.676133
4.05667	1.29957	5.94795	1.06722	0.526768			4.05667	1.37191	3.71161	0.559487	0.672219
4.06	1.29897	5.95043	1.06264	0.527268			4.06	1.37108	3.70717	0.555734	0.679864
4.06333	1.3016	5.95163	1.06283	0.527034			4.06333	1.37225	3.71475	0.559407	0.673089
4.06667	1.30342	5.95305	1.0638	0.526623			4.06667	1.37342	3.71582	0.561034	0.673887
4.07	1.30388	5.95065	1.06779	0.526121			4.07	1.38298	3.71253	0.556667	0.676084
4.07333	1.30374	5.95144	1.06675	0.526242			4.07333	1.37301	3.71883	0.556325	0.672218
4.07667	1.30556	5.95483	1.07007	0.524604			4.07667	1.37796	3.71418	0.55807	0.679176
4.08	1.30657	5.95466	1.07123	0.521075			4.08	1.37545	3.71848	0.558171	0.669625
4.08333	1.30879	5.95537	1.07088	0.52111			4.08333	1.37731	3.71559	0.558825	0.668516
4.08667	1.30983	5.96038	1.06836	0.524291			4.08667	1.37595	3.71017	0.561745	0.678963
4.09	1.31061	5.96264	1.0673	0.520979			4.09	1.38365	3.71605	0.555472	0.676778
4.09333	1.31233	5.96365	1.06752	0.522325			4.09333	1.38357	3.72456	0.558961	0.678475
4.09667	1.31293	5.96508	1.06419	0.523341			4.09667	1.38251	3.72409	0.557297	0.672327
4.1	1.31334	5.96431	1.06486	0.522943			4.1	1.3862	3.72184	0.559573	0.677642
4.10333	1.31457	5.96542	1.06727	0.51948			4.10333	1.38534	3.7225	0.556299	0.675973
4.10667	1.31609	5.9639	1.06685	0.521869			4.10667	1.3862	3.72435	0.559514	0.673737
4.11	1.31754	5.9656	1.06982	0.519327			4.11	1.39107	3.72611	0.55753	0.672758
4.11333	1.32134	5.96517	1.07252	0.520022			4.11333	1.38793	3.72503	0.554466	0.679565
4.11667	1.3223	5.96888	1.0708	0.519386			4.11667	1.39517	3.72872	0.553233	0.679069
4.12	1.32363	5.97097	1.06489	0.517654			4.12	1.39485	3.72301	0.560577	0.673296
4.12333	1.32545	5.97203	1.06332	0.517145			4.12333	1.39324	3.73326	0.556522	0.669719
4.12667	1.32554	5.97114	1.06499	0.519023			4.12667	1.3881	3.74187	0.553518	0.670034
4.13	1.32466	5.97135	1.06569	0.51976			4.13	1.39466	3.73566	0.560737	0.672601
4.13333	1.32756	5.97282	1.06466	0.520173			4.13333	1.39754	3.73778	0.552773	0.672439
4.13667	1.33104	5.975	1.06836	0.521138			4.13667	1.39668	3.73491	0.554817	0.670415
4.14	1.33171	5.97899	1.07036	0.520913			4.14	1.39929	3.73847	0.560631	0.672184
4.14333	1.33308	5.97967	1.06778	0.521974			4.14333	1.39462	3.74037	0.550964	0.6732
4.14667	1.33594	5.98229	1.06753	0.521336			4.14667	1.40381	3.73573	0.553742	0.67423
4.15	1.33662	5.98268	1.0704	0.519237			4.15	1.39658	3.73845	0.549666	0.672028
4.15333	1.33704	5.97954	1.07301	0.519744			4.15333	1.42107	3.74066	0.550319	0.672204
4.15667	1.3399	5.9781	1.0719	0.51897			4.15667	1.40851	3.74294	0.552799	0.67224
4.16	1.34363	5.98012	1.07085	0.515498			4.16	1.40381	3.74064	0.557156	0.672263
4.16333	1.3446	5.98277	1.06724	0.515467			4.16333	1.40463	3.74344	0.552992	0.668468
4.16667	1.34618	5.98344	1.065	0.515228			4.16667	1.40588	3.74435	0.555284	0.668629
4.17	1.34838	5.9873	1.0689	0.51291			4.17	1.40711	3.75113	0.559567	0.671292
4.17333	1.34817	5.99158	1.06868	0.512684			4.17333	1.40743	3.74683	0.554835	0.670243
4.17667	1.34779	5.99162	1.06626	0.515292			4.17667	1.41414	3.74807	0.557526	0.673809
4.18	1.34814	5.99361	1.06723	0.514884			4.18	1.41373	3.75224	0.553153	0.667611
4.18333	1.35123	5.9949	1.06944	0.518406			4.18333	1.4151	3.75149	0.556396	0.672047
4.18667	1.35473	5.99502	1.06484	0.522325			4.18667	1.41426	3.75165	0.558393	0.672436
4.19	1.35683	5.99454	1.06774	0.526408			4.19	1.41021	3.7562	0.55323	0.670399
4.19333	1.35776	5.99715	1.07015	0.525762			4.19333	1.41503	3.75602	0.553478	0.667771
4.19667	1.35966	5.9924	1.07181	0.525841			4.19667	1.41712	3.75359	0.550454	0.672809
4.2	1.3583	5.99448	1.07137	0.522441			4.2	1.41689	3.75566	0.558308	0.666876
4.20333	1.35901	5.99583	1.06823	0.516671			4.20333	1.42282	3.76325	0.552413	0.673381
4.20667	1.36149	5.99696	1.06652	0.513801			4.20667	1.42145	3.75693	0.556065	0.668968
4.21	1.36505	5.99879	1.06704	0.510804			4.21	1.42356	3.755	0.553706	0.669431
4.21333	1.3667	6.0055	1.06715	0.510032			4.21333	1.42799	3.75904	0.553554	0.668333
4.21667	1.36913	6.00585	1.0714	0.512215			4.21667	1.42233	3.76097	0.552623	0.66796
4.22	1.36859	6.00878	1.07617	0.517751			4.22	1.42437	3.76048	0.555422	0.665186
4.22333	1.36886	6.00998	1.07844	0.517087			4.22333	1.42005	3.76573	0.553305	0.668271
4.22667	1.3698	6.00963	1.07684	0.520893			4.22667	1.4257	3.76615	0.550604	0.663388
4.23	1.3713	6.00843	1.07626	0.523893			4.23	1.43131	3.76612	0.550323	0.67042
4.23333	1.37313	6.00958	1.07358	0.520694			4.23333	1.42628	3.76497	0.554308	0.666605
4.23667	1.37507	6.00788	1.07183	0.519022			4.23667	1.43285	3.76913	0.551263	0.671203
4.24	1.37693	6.01188	1.07181	0.520843			4.24	1.42917	3.76772	0.556746	0.666549
4.24333	1.3786	6.014	1.07549	0.520968			4.24333	1.43386	3.77597	0.551813	0.668979
4.24667	1.37984	6.01628	1.07521	0.519994			4.24667	1.43343	3.77428	0.552639	0.665786
4.25	1.38069	6.01529	1.07187	0.523798			4.25	1.42671	3.77591	0.54996	0.67221
4.25333	1.38141	6.01775	1.07592	0.521975			4.25333	1.44011	3.77246	0.547943	0.664094
4.25667	1.38164	6.01449	1.07362	0.520139			4.25667	1.43071	3.77194	0.547311	0.666434
4.26	1.38136	6.01418	1.07224	0.520066			4.26	1.43806	3.78126	0.554944	0.666645
4.26333	1.38201	6.0118	1.07146	0.518432			4.26333	1.43606	3.77932	0.552593	0.665013
4.26667	1.3842	6.01524	1.07368	0.514773			4.26667	1.43878	3.7835	0.551392	0.666303
4.27	1.38811	6.01755	1.07101	0.517431			4.27	1.43959	3.77061	0.554522	0.663624
4.27333	1.38944	6.02161	1.07202	0.519308			4.27333	1.44	3.77819	0.549878	0.667608
4.27667	1.38968	6.02334	1.0707	0.519853			4.27667	1.44397	3.77438	0.550969	0.668149
4.28	1.39135	6.02584	1.07436	0.517627			4.28	1.44406	3.78193	0.552046	0.663581
4.28333	1.39262	6.02275	1.0726	0.51695			4.28333	1.44366	3.7796	0.548542	0.664439
4.28667	1.3914	6.0244	1.07311	0.515872			4.28667	1.44367	3.78277	0.555486	0.666966
4.29	1.39387	6.02342	1.0756	0.512736			4.29	1.44535	3.78538	0.552805	0.66331
4.29333	1.3964	6.02521	1.07479	0.510794			4.29333	1.44145	3.78882	0.550727	0.662013
4.29667	1.40075	6.03067	1.07188	0.515262			4.29667	1.44658	3.78572	0.550078	0.666103
4.3	1.40206	6.03244	1.07157	0.518711			4.3	1.44047	3.78916	0.550534	0.666042
4.30333	1.40606	6.02888	1.0719	0.518452			4.30333	1.45155	3.7819	0.548998	0.671002
4.30667	1.40603	6.03126	1.07063	0.518038			4.30667	1.45006	3.79093	0.54821	0.666723
4.31	1.4092	6.031	1.07283	0.517087			4.31	1.45238	3.79361	0.550441	0.669008
4.31333	1.40812	6.03211	1.0742	0.514951			4.31333	1.45355	3.791	0.553029	0.664963
4.31667	1.40796	6.03593	1.07595	0.512923			4.31667	1.45324	3.79587	0.551503	0.667192
4.32	1.40754	6.04185	1.07585	0.510349			4.32	1.45702	3.79276	0.552238	0.66818
4.32333	1.40869	6.03967	1.07568	0.511548			4.32333	1.45338	3.79706	0.55068	0.662151
4.32667	1.4091	6.03998	1.07689	0.512542			4.32667	1.4623	3.79622	0.548845	0.659622
4.33	1.4112	6.04026	1.0792	0.510386			4.33	1.46368	3.79194	0.552298	0.661014
4.33333	1.41557	6.04139	1.07931	0.511762			4.33333	1.46006	3.79611	0.550809	0.661083
4.33667	1.41798	6.04099	1.07815	0.515948			4.33667	1.46002	3.7969	0.552475	0.663181
4.34	1.42058	6.04388	1.07949	0.518235			4.34	1.46145	3.80003	0.549466	0.665634
4.34333	1.42237	6.04656	1.07814	0.518039			4.34333	1.46295	3.79846	0.547192	0.666857
4.34667	1.42322	6.04367	1.07639	0.518986			4.34667	1.46144	3.80458	0.546334	0.665226
4.35	1.42371	6.04267	1.07508	0.517311			4.35	1.46683	3.79992	0.548284	0.666666
4.35333	1.42497	6.04625	1.07544	0.517179			4.35333	1.46573	3.79871	0.545096	0.659798
4.35667	1.42636	6.04676	1.07545	0.515758			4.35667	1.46526	3.80784	0.541735	0.659759
4.36	1.42596	6.04921	1.07658	0.516586			4.36	1.47286	3.80035	0.551263	0.667572
4.36333	1.42673	6.04999	1.07603	0.516555			4.36333	1.47301	3.80547	0.547034	0.660775
4.36667	1.42681	6.0523	1.07839	0.516664			4.36667	1.46773	3.80565	0.545644	0.666561
4.37	1.42876	6.04702	1.07865	0.514451			4.37	1.46734	3.80329	0.546734	0.663842
4.37333	1.42904	6.05127	1.07746	0.512789			4.37333	1.4721	3.81108	0.544495	0.665679
4.37667	1.43222	6.05105	1.07688	0.510232			4.37667	1.4749	3.80832	0.541642	0.663405
4.38	1.43323	6.05351	1.07657	0.510141			4.38	1.47315	3.80853	0.549008	0.662039
4.38333	1.43681	6.05461	1.07664	0.509703			4.38333	1.47392	3.80869	0.55099	0.65831
4.38667	1.43793	6.05719	1.07661	0.512649			4.38667	1.47121	3.81254	0.546189	0.661453
4.39	1.44099	6.0546	1.07549	0.514797			4.39	1.47737	3.80899	0.546889	0.661921
4.39333	1.44123	6.05423	1.07478	0.515027			4.39333	1.47201	3.8132	0.550286	0.66291
4.39667	1.44192	6.05723	1.0741	0.513746			4.39667	1.47567	3.81703	0.553763	0.656345
4.4	1.44097	6.05943	1.07054	0.516817			4.4	1.47787	3.81364	0.545544	0.665278
4.40333	1.44338	6.06303	1.07001	0.513913			4.40333	1.47926	3.81235	0.542371	0.664163
4.40667	1.44401	6.065	1.07014	0.513221			4.40667	1.47856	3.8202	0.549503	0.660297
4.41	1.44845	6.06212	1.06837	0.515122			4.41	1.47944	3.82014	0.550269	0.669757
4.41333	1.45028	6.06211	1.06884	0.516779			4.41333	1.48393	3.81904	0.547084	0.668825
4.41667	1.45331	6.06036	1.07219	0.514269			4.41667	1.48238	3.82206	0.540733	0.659649
4.42	1.45544	6.0632	1.07363	0.514567			4.42	1.48317	3.81648	0.546031	0.654996
4.42333	1.45783	6.06409	1.07324	0.513481			4.42333	1.47969	3.82037	0.546073	0.659526
4.42667	1.45728	6.07055	1.07349	0.510784			4.42667	1.48895	3.82003	0.541385	0.658208
4.43	1.45985	6.06857	1.07168	0.510763			4.43	1.48394	3.81787	0.544215	0.659336
4.43333	1.46031	6.0686	1.06838	0.507729			4.43333	1.48713	3.81988	0.544951	0.660188
4.43667	1.46041	6.06812	1.06787	0.505461			4.43667	1.492	3.8195	0.542099	0.657371
4.44	1.46032	6.07055	1.06663	0.504993			4.44	1.49231	3.82413	0.544028	0.655798
4.44333	1.4613	6.07016	1.06843	0.504969			4.44333	1.48974	3.8276	0.539545	0.658546
4.44667	1.46176	6.0766	1.0684	0.503971			4.44667	1.49689	3.82592	0.544265	0.661652
4.45	1.46228	6.07952	1.07137	0.509744			4.45	1.49928	3.82814	0.539748	0.663186
4.45333	1.46529	6.07884	1.07191	0.509608			4.45333	1.49223	3.82815	0.543966	0.663421
4.45667	1.46526	6.08128	1.07215	0.505848			4.45667	1.49903	3.82896	0.542914	0.659802
4.46	1.46756	6.08405	1.07026	0.507074			4.46	1.49626	3.82868	0.54238	0.655752
4.46333	1.46871	6.08184	1.07256	0.510285			4.46333	1.50296	3.83368	0.545453	0.659489
4.46667	1.47145	6.08076	1.07147	0.506672			4.46667	1.498	3.83334	0.544478	0.657966
4.47	1.47292	6.08265	1.0698	0.507807			4.47	1.50137	3.83196	0.544446	0.653919
4.47333	1.4759	6.07973	1.0687	0.511516			4.47333	1.50012	3.83068	0.540854	0.656576
4.47667	1.47766	6.08082	1.07023	0.511484			4.47667	1.49977	3.83471	0.540064	0.660487
4.48	1.47945	6.08303	1.07143	0.506939			4.48	1.50302	3.83355	0.543545	0.655517
4.48333	1.47935	6.08638	1.07159	0.504156			4.48333	1.50345	3.83686	0.544826	0.659176
4.48667	1.47986	6.08638	1.06845	0.506395			4.48667	1.50578	3.83769	0.541518	0.6557
4.49	1.48158	6.08546	1.07095	0.507016			4.49	1.50356	3.83476	0.541485	0.653494
4.49333	1.48212	6.08363	1.07185	0.504095			4.49333	1.50366	3.83668	0.542515	0.654535
4.49667	1.48366	6.07896	1.06988	0.506842			4.49667	1.50424	3.83596	0.542124	0.660301
4.5	1.48474	6.07998	1.06887	0.510011			4.5	1.50164	3.83432	0.545602	0.65027
4.50333	1.4871	6.0835	1.06945	0.507837			4.50333	1.50885	3.83573	0.541793	0.658613
4.50667	1.48894	6.08615	1.07027	0.508568			4.50667	1.51401	3.84185	0.542248	0.658343
4.51	1.49008	6.09152	1.0719	0.511506			4.51	1.51057	3.84389	0.546576	0.657537
4.51333	1.4906	6.09526	1.07307	0.510233			4.51333	1.51308	3.84483	0.542841	0.654432
4.51667	1.49466	6.09503	1.07312	0.513493			4.51667	1.51486	3.84178	0.544449	0.659684
4.52	1.49615	6.09811	1.07428	0.51425			4.52	1.51398	3.84213	0.541002	0.657523
4.52333	1.49722	6.09718	1.07409	0.513331			4.52333	1.51097	3.84379	0.545985	0.659226
4.52667	1.49645	6.09557	1.0724	0.514449			4.52667	1.51193	3.8464	0.540952	0.655356
4.53	1.50036	6.09854	1.07343	0.515308			4.53	1.514	3.84708	0.54163	0.654859
4.53333	1.49905	6.1029	1.07318	0.511588			4.53333	1.5179	3.84363	0.543943	0.649304
4.53667	1.50129	6.10298	1.07371	0.509942			4.53667	1.51794	3.84921	0.544293	0.652196
4.54	1.50276	6.10683	1.07144	0.510659			4.54	1.52026	3.85406	0.547936	0.653676
4.54333	1.50747	6.10751	1.06958	0.508324			4.54333	1.5179	3.84444	0.538918	0.65448
4.54667	1.5078	6.1055	1.07126	0.508395			4.54667	1.52638	3.85127	0.541287	0.660509
4.55	1.51149	6.10571	1.07055	0.510533			4.55	1.52123	3.85255	0.542554	0.65265
4.55333	1.51015	6.10734	1.06864	0.510995			4.55333	1.52159	3.84445	0.539066	0.654862
4.55667	1.51174	6.10822	1.07217	0.511258			4.55667	1.52465	3.85123	0.538477	0.657028
4.56	1.51273	6.10967	1.06901	0.510618			4.56	1.53081	3.84731	0.540276	0.653765
4.56333	1.51452	6.11161	1.06779	0.510183			4.56333	1.52221	3.85141	0.543762	0.651259
4.56667	1.51438	6.10989	1.07286	0.511078			4.56667	1.52379	3.84934	0.541728	0.652262
4.57	1.51802	6.10762	1.07504	0.511754			4.57	1.52943	3.85269	0.536195	0.652028
4.57333	1.51997	6.10877	1.07309	0.508695			4.57333	1.52933	3.8502	0.539999	0.653283
4.57667	1.52072	6.10856	1.07899	0.51021			4.57667	1.52774	3.85875	0.535221	0.652472
4.58	1.52142	6.10865	1.07823	0.508982			4.58	1.53359	3.85358	0.543292	0.656417
4.58333	1.52291	6.1086	1.07712	0.50732			4.58333	1.53415	3.85729	0.540844	0.655045
4.58667	1.52311	6.11261	1.07646	0.506662			4.58667	1.53439	3.85661	0.539489	0.655568
4.59	1.5255	6.11586	1.07686	0.509652			4.59	1.52921	3.86178	0.538335	0.655741
4.59333	1.52689	6.11326	1.07687	0.507787			4.59333	1.53677	3.85851	0.537534	0.651207
4.59667	1.52811	6.11617	1.07733	0.508889			4.59667	1.5327	3.862	0.541188	0.651476
4.6	1.53054	6.11971	1.07593	0.508857			4.6	1.54259	3.86034	0.535985	0.651404
4.60333	1.53123	6.11942	1.07561	0.510809			4.60333	1.53609	3.86531	0.541162	0.650271
4.60667	1.53184	6.11995	1.07621	0.510677			4.60667	1.54046	3.85988	0.541533	0.653258
4.61	1.53189	6.12357	1.07255	0.510532			4.61	1.5384	3.86266	0.537683	0.655385
4.61333	1.5341	6.12263	1.07253	0.513572			4.61333	1.53807	3.86109	0.538667	0.651223
4.61667	1.53374	6.12376	1.0729	0.512267			4.61667	1.54078	3.86623	0.540127	0.650151
4.62	1.53609	6.12384	1.07607	0.51044			4.62	1.54161	3.86483	0.537738	0.651455
4.62333	1.53646	6.12254	1.07442	0.510568			4.62333	1.54119	3.86095	0.542228	0.649541
4.62667	1.53828	6.12424	1.07542	0.512798			4.62667	1.54002	3.86591	0.533438	0.651201
4.63	1.53992	6.12896	1.07615	0.509817			4.63	1.54704	3.86913	0.53761	0.650894
4.63333	1.54359	6.13006	1.07614	0.508724			4.63333	1.54612	3.86821	0.538701	0.65547
4.63667	1.54603	6.13047	1.07769	0.510082			4.63667	1.54071	3.87453	0.538359	0.649085
4.64	1.54628	6.13044	1.07883	0.508089			4.64	1.55173	3.87652	0.533886	0.654132
4.64333	1.5493	6.13	1.08027	0.510327			4.64333	1.54873	3.87463	0.535536	0.656942
4.64667	1.55103	6.12609	1.078	0.509438			4.64667	1.5484	3.87305	0.537473	0.656951
4.65	1.5517	6.12463	1.07799	0.509123			4.65	1.54928	3.87174	0.537817	0.649996
4.65333	1.55287	6.12646	1.07646	0.507456			4.65333	1.55001	3.87856	0.533727	0.657649
4.65667	1.55619	6.12426	1.07617	0.506644			4.65667	1.55096	3.87524	0.538661	0.652369
4.66	1.55551	6.12634	1.07501	0.503317			4.66	1.54867	3.87429	0.540219	0.649025
4.66333	1.55442	6.12858	1.07534	0.501492			4.66333	1.55637	3.87271	0.535225	0.647139
4.66667	1.55363	6.13149	1.07607	0.500163			4.66667	1.55703	3.88102	0.540607	0.648623
4.67	1.55361	6.13248	1.07354	0.501843			4.67	1.55311	3.87793	0.535764	0.650708
4.67333	1.55155	6.13709	1.07083	0.500614			4.67333	1.56306	3.87893	0.540318	0.645399
4.67667	1.55416	6.13925	1.07283	0.502342			4.67667	1.55485	3.88335	0.533778	0.654473
4.68	1.55846	6.14054	1.0738	0.503054			4.68	1.5529	3.87968	0.536529	0.647311
4.68333	1.56364	6.13853	1.07366	0.506712			4.68333	1.56302	3.88277	0.535382	0.647954
4.68667	1.5651	6.14032	1.07129	0.504357			4.68667	1.55889	3.88365	0.536181	0.652927
4.69	1.57024	6.14082	1.07474	0.503833			4.69	1.55578	3.88427	0.531709	0.648335
4.69333	1.57085	6.14131	1.07444	0.503322			4.69333	1.56172	3.88078	0.538299	0.64914
4.69667	1.57027	6.1399	1.07437	0.502989			4.69667	1.55953	3.87893	0.536226	0.648899
4.7	1.56975	6.14136	1.07461	0.502855			4.7	1.55751	3.88166	0.533473	0.653776
4.70333	1.57334	6.14095	1.07621	0.501763			4.70333	1.56547	3.87864	0.539072	0.646603
4.70667	1.57334	6.14311	1.07397	0.503226			4.70667	1.56437	3.88141	0.536734	0.648942
4.71	1.57411	6.14038	1.07265	0.501028			4.71	1.56289	3.88209	0.535771	0.644843
4.71333	1.57548	6.14553	1.07144	0.502269			4.71333	1.56215	3.88479	0.532273	0.643978
4.71667	1.57727	6.14763	1.0703	0.502132			4.71667	1.56728	3.88686	0.537908	0.646433
4.72	1.57739	6.14971	1.07477	0.504998			4.72	1.5704	3.88416	0.530117	0.64586
4.72333	1.57923	6.15093	1.0765	0.503438			4.72333	1.5633	3.8922	0.537644	0.645131
4.72667	1.5811	6.15406	1.07896	0.504613			4.72667	1.56981	3.8856	0.536486	0.646404
4.73	1.58255	6.15229	1.08078	0.503706			4.73	1.56926	3.88453	0.53318	0.64785
4.73333	1.58387	6.15606	1.08134	0.504099			4.73333	1.57321	3.88537	0.538225	0.645374
4.73667	1.58494	6.15497	1.0796	0.504502			4.73667	1.57485	3.8847	0.536511	0.645875
4.74	1.58536	6.15591	1.08147	0.505805			4.74	1.57255	3.88771	0.531953	0.647303
4.74333	1.58786	6.15791	1.07983	0.505357			4.74333	1.57277	3.89165	0.535271	0.653793
4.74667	1.58746	6.16114	1.07662	0.506839			4.74667	1.57929	3.88897	0.535564	0.647056
4.75	1.58871	6.15901	1.07231	0.506864			4.75	1.57879	3.8937	0.533006	0.642929
4.75333	1.59031	6.16192	1.07405	0.507984			4.75333	1.57977	3.89201	0.53469	0.643065
4.75667	1.59253	6.15945	1.07188	0.509382			4.75667	1.57604	3.90075	0.532819	0.644802
4.76	1.59313	6.15936	1.07075	0.5104			4.76	1.57726	3.89143	0.535518	0.640116
4.76333	1.59797	6.15807	1.07046	0.508107			4.76333	1.57964	3.90567	0.532354	0.641134
4.76667	1.59901	6.16088	1.07561	0.504333			4.76667	1.58142	3.88839	0.532473	0.647701
4.77	1.59977	6.16007	1.07168	0.503151			4.77	1.58162	3.89403	0.534883	0.649099
4.77333	1.60302	6.16348	1.07498	0.502077			4.77333	1.58141	3.89559	0.529846	0.642039
4.77667	1.60488	6.1665	1.0727	0.501399			4.77667	1.58527	3.89394	0.527119	0.646137
4.78	1.60418	6.17065	1.07713	0.504396			4.78	1.58779	3.90013	0.53545	0.642192
4.78333	1.60465	6.17105	1.07565	0.505449			4.78333	1.58511	3.89967	0.531029	0.645691
4.78667	1.60779	6.17286	1.07838	0.503905			4.78667	1.58128	3.90152	0.533468	0.641831
4.79	1.60594	6.17352	1.07174	0.504735			4.79	1.58626	3.89606	0.53649	0.646657
4.79333	1.60588	6.17026	1.07675	0.503558			4.79333	1.58647	3.90321	0.534656	0.644452
4.79667	1.60654	6.1698	1.0743	0.50166			4.79667	1.58756	3.89968	0.535139	0.64145
4.8	1.60919	6.17016	1.07528	0.503724			4.8	1.58848	3.90244	0.533861	0.642784
4.80333	1.6096	6.17048	1.07413	0.503038			4.80333	1.59179	3.9058	0.534605	0.644083
4.80667	1.61114	6.17019	1.07843	0.502211			4.80667	1.58903	3.9039	0.529587	0.643447
4.81	1.61499	6.17485	1.07491	0.502882			4.81	1.5909	3.8995	0.533768	0.640528
4.81333	1.61562	6.1756	1.07505	0.502099			4.81333	1.58991	3.90275	0.534909	0.639945
4.81667	1.61554	6.17321	1.07173	0.500269			4.81667	1.59699	3.9034	0.529746	0.645877
4.82	1.61741	6.17303	1.07007	0.499948			4.82	1.5951	3.90724	0.532927	0.640416
4.82333	1.61924	6.17464	1.06973	0.499071			4.82333	1.59612	3.90331	0.530878	0.639549
4.82667	1.61825	6.17039	1.07322	0.499211			4.82667	1.5926	3.90593	0.527284	0.639219
4.83	1.62117	6.17124	1.07266	0.501277			4.83	1.59501	3.90671	0.528884	0.640878
4.83333	1.62358	6.17308	1.0751	0.500915			4.83333	1.59568	3.91022	0.532521	0.643932
4.83667	1.62533	6.17558	1.07724	0.500961			4.83667	1.59935	3.9112	0.5302	0.645343
4.84	1.6278	6.17481	1.07925	0.503511			4.84	1.59825	3.91308	0.52394	0.642677
4.84333	1.63046	6.1791	1.07653	0.504847			4.84333	1.60445	3.91287	0.531039	0.636701
4.84667	1.63264	6.17915	1.07924	0.503897			4.84667	1.59966	3.91378	0.529725	0.638485
4.85	1.63382	6.1777	1.07976	0.503994			4.85	1.60163	3.9166	0.529615	0.64437
4.85333	1.63345	6.17649	1.07861	0.504475			4.85333	1.6029	3.90929	0.527701	0.643776
4.85667	1.63436	6.17651	1.0807	0.503571			4.85667	1.60672	3.91303	0.534982	0.646857
4.86	1.63585	6.17558	1.08354	0.503163			4.86	1.60092	3.91363	0.531477	0.642996
4.86333	1.63784	6.17392	1.08417	0.502509			4.86333	1.6079	3.91585	0.529241	0.639964
4.86667	1.64002	6.17814	1.08404	0.503987			4.86667	1.60645	3.91608	0.530676	0.637768
4.87	1.64263	6.17687	1.08232	0.505747			4.87	1.60562	3.91187	0.5293	0.636374
4.87333	1.64419	6.18325	1.07957	0.505121			4.87333	1.60426	3.9187	0.52868	0.640815
4.87667	1.64511	6.18473	1.08072	0.504678			4.87667	1.60877	3.91413	0.528654	0.6409
4.88	1.64449	6.18622	1.07931	0.506671			4.88	1.60909	3.91734	0.529227	0.645226
4.88333	1.64647	6.18646	1.07916	0.507799			4.88333	1.61309	3.91515	0.528581	0.643964
4.88667	1.64747	6.18999	1.0836	0.506466			4.88667	1.61432	3.92416	0.526867	0.640485
4.89	1.64813	6.18629	1.08241	0.508441			4.89	1.61048	3.91913	0.54027	0.634187
4.89333	1.64872	6.18467	1.08114	0.508014			4.89333	1.61242	3.92405	0.533104	0.638075
4.89667	1.65055	6.1881	1.08189	0.504938			4.89667	1.61508	3.91562	0.531076	0.643757
4.9	1.65218	6.18982	1.0795	0.499853			4.9	1.61625	3.92363	0.526479	0.63951
4.90333	1.65585	6.19215	1.07886	0.49894			4.90333	1.61605	3.91785	0.536316	0.637653
4.90667	1.65758	6.19592	1.0808	0.494744			4.90667	1.62183	3.92102	0.528073	0.639894
4.91	1.66044	6.19947	1.07755	0.491832			4.91	1.61974	3.91948	0.530769	0.639779
4.91333	1.66295	6.20117	1.07826	0.493709			4.91333	1.62061	3.92664	0.533468	0.639893
4.91667	1.66172	6.20194	1.07971	0.497545			4.91667	1.6178	3.92218	0.529674	0.639942
4.92	1.66076	6.1978	1.0781	0.498505			4.92	1.61477	3.92261	0.525308	0.641447
4.92333	1.66091	6.19613	1.07572	0.49745			4.92333	1.6244	3.92638	0.525	0.635551
4.92667	1.66216	6.19556	1.08039	0.498819			4.92667	1.62711	3.92283	0.531245	0.641918
4.93	1.66416	6.19197	1.07661	0.496852			4.93	1.61879	3.92976	0.528872	0.638346
4.93333	1.66687	6.19112	1.07978	0.498295			4.93333	1.62161	3.92294	0.526413	0.640495
4.93667	1.66896	6.19728	1.07873	0.49526			4.93667	1.62373	3.92495	0.527013	0.63539
4.94	1.67098	6.19746	1.08037	0.495811			4.94	1.61701	3.9263	0.523469	0.636531
4.94333	1.67205	6.20025	1.07609	0.494972			4.94333	1.62423	3.93416	0.528623	0.632968
4.94667	1.67128	6.20176	1.07724	0.496444			4.94667	1.62858	3.93033	0.52279	0.636647
4.95	1.67313	6.203	1.07336	0.49458			4.95	1.62476	3.92725	0.526926	0.638736
4.95333	1.67191	6.20466	1.07912	0.49602			4.95333	1.62078	3.92959	0.525666	0.635763
4.95667	1.67314	6.20466	1.07791	0.497564			4.95667	1.62253	3.9314	0.52772	0.647061
4.96	1.67288	6.2035	1.07557	0.496273			4.96	1.62961	3.92963	0.529349	0.634692
4.96333	1.67469	6.20506	1.0745	0.495627			4.96333	1.63055	3.93141	0.519522	0.631811
4.96667	1.67413	6.2063	1.07554	0.495295			4.96667	1.6294	3.92739	0.526519	0.637423
4.97	1.67776	6.2058	1.07066	0.495534			4.97	1.63058	3.93824	0.526108	0.632162
4.97333	1.67976	6.20922	1.07269	0.494887			4.97333	1.63376	3.9293	0.521808	0.637387
4.97667	1.67967	6.21255	1.07938	0.495446			4.97667	1.63676	3.93545	0.528968	0.638368
4.98	1.68194	6.21065	1.082	0.495356			4.98	1.63762	3.9353	0.521187	0.636482
4.98333	1.68528	6.21071	1.08136	0.494887			4.98333	1.64027	3.93363	0.525287	0.63109
4.98667	1.68613	6.21301	1.08102	0.495077			4.98667	1.63706	3.94289	0.530358	0.634304
4.99	1.68711	6.2117	1.08117	0.495136			4.99	1.63493	3.94008	0.527699	0.64044
4.99333	1.6904	6.21288	1.07896	0.496796			4.99333	1.63302	3.93158	0.525747	0.641202
4.99667	1.69019	6.21468	1.07939	0.495647			4.99667	1.64051	3.93217	0.526689	0.633546
5	1.69044	6.21571	1.08115	0.498306			5	1.63923	3.93656	0.526124	0.636766
5.00333	1.69191	6.21488	1.08169	0.497952			5.00333	1.64167	3.93849	0.524749	0.636963
5.00667	1.69349	6.2192	1.08118	0.500065			5.00667	1.64157	3.93721	0.519319	0.641476
5.01	1.69541	6.21942	1.08037	0.49896			5.01	1.64337	3.94103	0.521356	0.635071
5.01333	1.69554	6.22223	1.07971	0.498784			5.01333	1.646	3.94011	0.52382	0.634151
5.01667	1.69597	6.22618	1.08124	0.49721			5.01667	1.64288	3.93671	0.526192	0.633836
5.02	1.69852	6.22436	1.08023	0.498302			5.02	1.647	3.93964	0.518284	0.633357
5.02333	1.7008	6.22157	1.07816	0.498043			5.02333	1.64919	3.94205	0.522427	0.637716
5.02667	1.70157	6.22278	1.07736	0.501385			5.02667	1.64387	3.93789	0.521123	0.63259
5.03	1.70288	6.22413	1.07548	0.503881			5.03	1.64573	3.94167	0.520771	0.632129
5.03333	1.70725	6.22029	1.06906	0.502816			5.03333	1.64606	3.93921	0.525176	0.63075
5.03667	1.70765	6.22392	1.07442	0.503128			5.03667	1.6429	3.94102	0.521871	0.631107
5.04	1.70581	6.2227	1.07199	0.503474			5.04	1.65269	3.94725	0.522766	0.633307
5.04333	1.70772	6.22241	1.06934	0.500821			5.04333	1.6505	3.94169	0.522849	0.637901
5.04667	1.71048	6.22365	1.07165	0.499324			5.04667	1.64664	3.94683	0.520172	0.634417
5.05	1.7094	6.22772	1.07402	0.500225			5.05	1.65104	3.94837	0.523766	0.631685
5.05333	1.71039	6.22879	1.07233	0.498238			5.05333	1.65311	3.9457	0.518105	0.634703
5.05667	1.71273	6.23435	1.0746	0.49403			5.05667	1.65284	3.94574	0.521872	0.635302
5.06	1.71366	6.2358	1.07797	0.494276			5.06	1.65101	3.94747	0.527933	0.63468
5.06333	1.7161	6.23298	1.07604	0.493056			5.06333	1.64873	3.94406	0.52451	0.630635
5.06667	1.71881	6.23088	1.07779	0.488798			5.06667	1.65619	3.95217	0.520763	0.632307
5.07	1.72181	6.22795	1.08049	0.490362			5.07	1.65088	3.94187	0.520621	0.635405
5.07333	1.72288	6.22761	1.08209	0.492334			5.07333	1.65477	3.9428	0.522628	0.638047
5.07667	1.72144	6.22704	1.08405	0.491717			5.07667	1.65812	3.94654	0.517189	0.631786
5.08	1.72081	6.22917	1.08526	0.493676			5.08	1.65899	3.94586	0.52317	0.636265
5.08333	1.71952	6.23086	1.08609	0.4971			5.08333	1.66435	3.95175	0.521151	0.629059
5.08667	1.71944	6.23671	1.08113	0.498758			5.08667	1.65776	3.95239	0.522682	0.628536
5.09	1.72126	6.23746	1.0793	0.499437			5.09	1.66068	3.95265	0.519193	0.630631
5.09333	1.72559	6.23764	1.07867	0.499372			5.09333	1.65698	3.94925	0.525608	0.630729
5.09667	1.72681	6.23785	1.07949	0.499297			5.09667	1.65905	3.95997	0.525336	0.632747
5.1	1.72989	6.2412	1.08013	0.495592			5.1	1.66072	3.95295	0.524473	0.623131
5.10333	1.7303	6.23765	1.0802	0.493503			5.10333	1.66024	3.95118	0.518925	0.63311
5.10667	1.73109	6.23726	1.08117	0.492384			5.10667	1.65766	3.95413	0.517788	0.632367
5.11	1.73263	6.24009	1.08128	0.492891			5.11	1.66038	3.95628	0.524693	0.628498
5.11333	1.73328	6.24242	1.08029	0.491582			5.11333	1.66999	3.95769	0.514509	0.628667
5.11667	1.73462	6.23952	1.07881	0.490154			5.11667	1.66728	3.95176	0.521706	0.633449
5.12	1.73824	6.24575	1.08008	0.49044			5.12	1.66531	3.95928	0.518436	0.627227
5.12333	1.74042	6.247	1.08213	0.489425			5.12333	1.67774	3.96466	0.522263	0.633431
5.12667	1.74166	6.24731	1.08162	0.490368			5.12667	1.6732	3.95613	0.522043	0.624482
5.13	1.74348	6.2487	1.08129	0.491513			5.13	1.66847	3.95907	0.51419	0.628175
5.13333	1.74687	6.24796	1.08403	0.495258			5.13333	1.67405	3.9541	0.524253	0.625478
5.13667	1.74705	6.24378	1.08374	0.492432			5.13667	1.67311	3.96108	0.517731	0.631285
5.14	1.74827	6.24353	1.08147	0.496026			5.14	1.66916	3.96162	0.518927	0.63117
5.14333	1.75022	6.24333	1.08164	0.495442			5.14333	1.67308	3.95951	0.520624	0.630189
5.14667	1.75318	6.24455	1.08181	0.496791			5.14667	1.67534	3.96467	0.521298	0.632232
5.15	1.75017	6.25085	1.08045	0.495194			5.15	1.67257	3.95825	0.519098	0.629232
5.15333	1.75032	6.25199	1.07888	0.494562			5.15333	1.67455	3.95284	0.51905	0.632214
5.15667	1.75069	6.25215	1.08037	0.491397			5.15667	1.67479	3.95944	0.52035	0.624019
5.16	1.75051	6.25427	1.07977	0.489853			5.16	1.67562	3.96188	0.515358	0.632809
5.16333	1.75017	6.25277	1.08177	0.488386			5.16333	1.67622	3.96258	0.52283	0.626853
5.16667	1.75345	6.2513	1.08105	0.490506			5.16667	1.6815	3.96187	0.521203	0.628203
5.17	1.7576	6.25124	1.08233	0.491486			5.17	1.67985	3.9611	0.521825	0.628146
5.17333	1.75867	6.25069	1.08363	0.493654			5.17333	1.67623	3.96995	0.522721	0.623671
5.17667	1.76068	6.25277	1.08551	0.49173			5.17667	1.67354	3.96155	0.519844	0.630899
5.18	1.76258	6.25443	1.0837	0.493382			5.18	1.68015	3.96051	0.519276	0.63043
5.18333	1.76503	6.2571	1.08566	0.49082			5.18333	1.67775	3.96367	0.518343	0.625984
5.18667	1.76269	6.26129	1.08571	0.491292			5.18667	1.68819	3.96584	0.520779	0.631816
5.19	1.76306	6.26626	1.08242	0.492349			5.19	1.68458	3.96122	0.516383	0.626553
5.19333	1.7623	6.26462	1.0804	0.495264			5.19333	1.68406	3.96957	0.522259	0.628197
5.19667	1.76251	6.26592	1.08136	0.492542			5.19667	1.68704	3.96668	0.518012	0.626752
5.2	1.76298	6.26595	1.07986	0.492658			5.2	1.68362	3.97309	0.511548	0.632243
5.20333	1.7679	6.26485	1.08032	0.491736			5.20333	1.68249	3.96192	0.51435	0.628387
5.20667	1.77069	6.26422	1.07857	0.488423			5.20667	1.68703	3.96754	0.518952	0.627255
5.21	1.77129	6.26386	1.07849	0.486566			5.21	1.68824	3.9686	0.514245	0.625992
5.21333	1.7734	6.26449	1.07722	0.487802			5.21333	1.68727	3.97099	0.509882	0.629041
5.21667	1.77474	6.26415	1.07571	0.487607			5.21667	1.68718	3.96897	0.515883	0.627148
5.22	1.77441	6.26262	1.07632	0.487716			5.22	1.69152	3.9688	0.518783	0.628584
5.22333	1.77546	6.26239	1.0762	0.488101			5.22333	1.69049	3.97307	0.512123	0.623285
5.22667	1.77758	6.26427	1.07824	0.488765			5.22667	1.69104	3.97491	0.516281	0.630479
5.23	1.77966	6.26365	1.07649	0.488782			5.23	1.69269	3.97638	0.518174	0.62888
5.23333	1.78019	6.26639	1.07527	0.491574			5.23333	1.68829	3.97146	0.518305	0.627083
5.23667	1.78299	6.26757	1.07124	0.492966			5.23667	1.69717	3.96919	0.517429	0.627623
5.24	1.78475	6.27102	1.07353	0.493581			5.24	1.6965	3.97374	0.517	0.629453
5.24333	1.78832	6.27314	1.07332	0.496841			5.24333	1.695	3.97334	0.51629	0.627519
5.24667	1.78898	6.27559	1.07619	0.497213			5.24667	1.69681	3.97581	0.51817	0.625085
5.25	1.792	6.27424	1.07714	0.494429			5.25	1.6962	3.97824	0.512657	0.626027
5.25333	1.79155	6.27735	1.07667	0.493976			5.25333	1.69915	3.97113	0.51476	0.627347
5.25667	1.79384	6.2788	1.07899	0.494776			5.25667	1.69722	3.97338	0.515451	0.621798
5.26	1.79159	6.27891	1.07728	0.493388			5.26	1.70297	3.97424	0.516121	0.624583
5.26333	1.79156	6.27943	1.07586	0.490984			5.26333	1.69475	3.97511	0.516959	0.620818
5.26667	1.79255	6.28278	1.07556	0.491598			5.26667	1.69738	3.97934	0.518214	0.627137
5.27	1.79364	6.2833	1.07663	0.4923			5.27	1.7001	3.97304	0.514561	0.623848
5.27333	1.79268	6.28001	1.07432	0.490301			5.27333	1.7053	3.97145	0.514642	0.624626
5.27667	1.79612	6.28043	1.07556	0.491161			5.27667	1.70499	3.97149	0.514779	0.625892
5.28	1.7993	6.2822	1.07374	0.491668			5.28	1.698	3.97939	0.515122	0.622008
5.28333	1.7992	6.2807	1.07466	0.489686			5.28333	1.70157	3.98296	0.516198	0.625894
5.28667	1.80226	6.28228	1.07518	0.489422			5.28667	1.70057	3.98058	0.518189	0.623512
5.29	1.80569	6.28562	1.07645	0.491593			5.29	1.70458	3.97951	0.519495	0.630856
5.29333	1.80735	6.28953	1.07536	0.488423			5.29333	1.70595	3.98428	0.516631	0.625115
5.29667	1.80985	6.29109	1.07683	0.489799			5.29667	1.70719	3.9814	0.508581	0.626801
5.3	1.81056	6.29314	1.076	0.491565			5.3	1.70647	3.97258	0.51628	0.623735
5.30333	1.81021	6.29495	1.07895	0.489343			5.30333	1.70734	3.98073	0.520008	0.621884
5.30667	1.80987	6.29482	1.07754	0.486988			5.30667	1.70937	3.98332	0.516982	0.622817
5.31	1.81025	6.29288	1.07869	0.487349			5.31	1.70652	3.97884	0.514645	0.6249
5.31333	1.80903	6.29283	1.07762	0.484909			5.31333	1.70784	3.98646	0.515898	0.62474
5.31667	1.81129	6.29367	1.07997	0.483132			5.31667	1.72204	3.97978	0.51008	0.623195
5.32	1.81329	6.29141	1.07931	0.485701			5.32	1.70667	3.97952	0.513694	0.624096
5.32333	1.81349	6.292	1.0801	0.483797			5.32333	1.71286	3.98445	0.51483	0.616894
5.32667	1.8145	6.29125	1.07708	0.481597			5.32667	1.70663	3.97789	0.511993	0.620222
5.33	1.81789	6.29103	1.0792	0.483727			5.33	1.71036	3.9848	0.517439	0.619748
5.33333	1.81753	6.29355	1.07854	0.485599			5.33333	1.71167	3.98432	0.51456	0.62084
5.33667	1.81713	6.29518	1.07659	0.486641			5.33667	1.71263	3.9811	0.50838	0.617949
5.34	1.8199	6.29373	1.0772	0.488344			5.34	1.71371	3.98323	0.510494	0.616138
5.34333	1.82051	6.29471	1.07911	0.490532			5.34333	1.71321	3.9827	0.516088	0.621396
5.34667	1.81941	6.29237	1.07864	0.490462			5.34667	1.71704	3.98032	0.510206	0.624582
5.35	1.82287	6.28918	1.08048	0.488756			5.35	1.71918	3.98634	0.505803	0.627102
5.35333	1.82531	6.29094	1.08365	0.487338			5.35333	1.71636	3.98565	0.512694	0.622976
5.35667	1.82704	6.29419	1.08342	0.485406			5.35667	1.72104	3.98751	0.508114	0.626872
5.36	1.82785	6.29473	1.08192	0.485191			5.36	1.71783	3.98704	0.506552	0.621748
5.36333	1.83058	6.29664	1.08538	0.481531			5.36333	1.71716	3.98443	0.508419	0.620982
5.36667	1.83008	6.2997	1.08342	0.480986			5.36667	1.71974	3.98678	0.511951	0.615
5.37	1.83391	6.29879	1.08189	0.480992			5.37	1.71987	3.9879	0.512341	0.621979
5.37333	1.83496	6.29611	1.07961	0.481237			5.37333	1.7217	3.98905	0.511544	0.621621
5.37667	1.83659	6.29764	1.08154	0.481558			5.37667	1.72191	3.98681	0.509436	0.623359
5.38	1.83779	6.30003	1.07862	0.484027			5.38	1.72383	3.99591	0.508216	0.619014
5.38333	1.84136	6.30198	1.08004	0.487457			5.38333	1.71878	3.98097	0.507787	0.620819
5.38667	1.84318	6.30437	1.07827	0.48807			5.38667	1.72549	3.98623	0.514448	0.619619
5.39	1.84322	6.3074	1.07827	0.489795			5.39	1.72755	3.98394	0.50722	0.618191
5.39333	1.8449	6.30652	1.07943	0.488837			5.39333	1.725	3.9941	0.515448	0.618545
5.39667	1.84569	6.30393	1.07872	0.487676			5.39667	1.72739	3.9922	0.514767	0.619351
5.4	1.84435	6.30304	1.07673	0.48467			5.4	1.72516	3.98972	0.508271	0.61732
5.40333	1.84366	6.30334	1.07537	0.482488			5.40333	1.72761	3.99132	0.509302	0.616956
5.40667	1.84476	6.30638	1.07941	0.482902			5.40667	1.73314	3.9958	0.511929	0.619839
5.41	1.84525	6.30793	1.07806	0.480675			5.41	1.73136	3.9975	0.510169	0.62316
5.41333	1.84525	6.31434	1.07872	0.481806			5.41333	1.73124	3.99104	0.502653	0.617416
5.41667	1.84633	6.31305	1.0799	0.481264			5.41667	1.73468	3.99265	0.514478	0.613588
5.42	1.84648	6.31378	1.08205	0.481031			5.42	1.7371	3.99696	0.51196	0.619801
5.42333	1.8468	6.31359	1.0811	0.479212			5.42333	1.72823	3.9964	0.510785	0.621974
5.42667	1.84881	6.31097	1.08047	0.483206			5.42667	1.74029	3.99477	0.505268	0.615832
5.43	1.84851	6.30878	1.0816	0.481995			5.43	1.74117	3.99566	0.512655	0.622532
5.43333	1.84989	6.31163	1.08121	0.485216			5.43333	1.73007	3.99708	0.506856	0.619724
5.43667	1.84978	6.31005	1.08283	0.483099			5.43667	1.73731	4.00007	0.507053	0.619708
5.44	1.85169	6.31225	1.08126	0.481434			5.44	1.73663	3.9972	0.510422	0.620492
5.44333	1.85254	6.31514	1.08109	0.479718			5.44333	1.73453	3.99246	0.50547	0.619006
5.44667	1.85603	6.31647	1.07985	0.480355			5.44667	1.73144	3.99739	0.509757	0.619285
5.45	1.85668	6.31796	1.07918	0.479893			5.45	1.73209	4.001	0.509299	0.61511
5.45333	1.85892	6.32074	1.07857	0.482943			5.45333	1.74022	4.00237	0.507554	0.61955
5.45667	1.85948	6.31957	1.07958	0.486172			5.45667	1.74032	3.99782	0.513976	0.615147
5.46	1.86153	6.32231	1.08023	0.485918			5.46	1.74063	4.00342	0.51264	0.621989
5.46333	1.86206	6.32183	1.07895	0.484518			5.46333	1.74152	3.99689	0.50438	0.612304
5.46667	1.86431	6.32306	1.08175	0.484379			5.46667	1.74195	4.00156	0.502597	0.620275
5.47	1.86556	6.32394	1.07944	0.485925			5.47	1.74522	4.00312	0.509207	0.614402
5.47333	1.87114	6.32238	1.07724	0.486923			5.47333	1.74145	4.00398	0.507132	0.617098
5.47667	1.87366	6.32285	1.07707	0.487139			5.47667	1.74354	4.00369	0.504093	0.621796
5.48	1.8735	6.32109	1.07831	0.485436			5.48	1.74572	4.00301	0.507103	0.62183
5.48333	1.87373	6.3178	1.07705	0.487057			5.48333	1.74644	4.00276	0.512011	0.621385
5.48667	1.87784	6.3172	1.07993	0.485733			5.48667	1.74101	4.00247	0.509149	0.619646
5.49	1.87652	6.31908	1.08131	0.482174			5.49	1.74621	4.00297	0.506744	0.617521
5.49333	1.87467	6.31506	1.08124	0.482228			5.49333	1.74151	4.00253	0.508922	0.610875
5.49667	1.87756	6.31857	1.08089	0.485164			5.49667	1.74836	4.00136	0.509122	0.620341
5.5	1.87884	6.31909	1.07986	0.479555			5.5	1.74961	4.00522	0.508894	0.619325
5.50333	1.88072	6.32275	1.07803	0.481011			5.50333	1.74916	4.00221	0.506973	0.612384
5.50667	1.88114	6.32291	1.0806	0.481221			5.50667	1.75264	4.00431	0.509428	0.61444
5.51	1.88397	6.33022	1.08024	0.479757			5.51	1.74587	4.00857	0.506799	0.619677
5.51333	1.88511	6.33234	1.08157	0.478924			5.51333	1.74756	4.01111	0.502453	0.618044
5.51667	1.88652	6.33456	1.08094	0.485247			5.51667	1.75316	4.01144	0.50675	0.615689
5.52	1.88635	6.332	1.08431	0.480034			5.52	1.74865	4.01053	0.510374	0.615085
5.52333	1.88733	6.33365	1.08138	0.480806			5.52333	1.75031	4.0067	0.51046	0.620256
5.52667	1.88732	6.33072	1.07965	0.48316			5.52667	1.7582	4.00799	0.50544	0.613265
5.53	1.88956	6.32974	1.07734	0.482735			5.53	1.7523	4.00356	0.505261	0.621564
5.53333	1.89001	6.33042	1.08167	0.482384			5.53333	1.74627	4.01029	0.506954	0.617255
5.53667	1.88967	6.33192	1.07897	0.485066			5.53667	1.75267	4.00708	0.509452	0.621317
5.54	1.8913	6.33251	1.0791	0.486997			5.54	1.75452	4.01232	0.509752	0.6107
5.54333	1.89327	6.33361	1.0803	0.487517			5.54333	1.75485	4.00909	0.501836	0.612495
5.54667	1.89239	6.33252	1.08098	0.487945			5.54667	1.75991	4.00551	0.503756	0.616284
5.55	1.89472	6.33409	1.07794	0.484565			5.55	1.75499	4.01	0.512323	0.611592
5.55333	1.89793	6.33589	1.0757	0.485769			5.55333	1.75449	4.01097	0.506041	0.614853
5.55667	1.89923	6.33682	1.07645	0.485718			5.55667	1.76178	4.01091	0.504694	0.618921
5.56	1.90086	6.33512	1.08061	0.486146			5.56	1.76083	4.00802	0.49961	0.612237
5.56333	1.90435	6.33599	1.08207	0.486496			5.56333	1.75645	4.01647	0.502752	0.610346
5.56667	1.90509	6.33648	1.08275	0.486668			5.56667	1.76052	4.0088	0.504635	0.610205
5.57	1.90463	6.3346	1.08518	0.487286			5.57	1.75842	4.00706	0.505213	0.615004
5.57333	1.90462	6.33154	1.08388	0.486844			5.57333	1.76108	4.01646	0.503706	0.617237
5.57667	1.90588	6.33402	1.08274	0.485625			5.57667	1.76799	4.01345	0.506597	0.616801
5.58	1.90636	6.33835	1.08003	0.487668			5.58	1.75649	4.01761	0.499679	0.615069
5.58333	1.90768	6.33883	1.07915	0.487625			5.58333	1.7604	4.01709	0.50339	0.611617
5.58667	1.90931	6.34133	1.0793	0.484938			5.58667	1.76491	4.01499	0.508856	0.615395
5.59	1.91266	6.34472	1.08189	0.485063			5.59	1.75909	4.01217	0.50187	0.617929
5.59333	1.91453	6.34864	1.08089	0.48715			5.59333	1.76044	4.01849	0.512136	0.613945
5.59667	1.91482	6.3467	1.08275	0.484709			5.59667	1.76453	4.00975	0.503816	0.611149
5.6	1.91483	6.34615	1.08106	0.485751			5.6	1.76857	4.01316	0.504337	0.608622
5.60333	1.91534	6.34841	1.07851	0.487333			5.60333	1.76428	4.01602	0.505328	0.612365
5.60667	1.9149	6.35119	1.07738	0.485327			5.60667	1.76973	4.01635	0.503609	0.610451
5.61	1.9154	6.3491	1.07491	0.482574			5.61	1.76474	4.01178	0.505639	0.619836
5.61333	1.91574	6.3508	1.07303	0.483772			5.61333	1.77214	4.01691	0.502345	0.608059
5.61667	1.91699	6.35541	1.07585	0.481684			5.61667	1.7762	4.00771	0.502342	0.612496
5.62	1.91859	6.3545	1.07985	0.480674			5.62	1.7763	4.01167	0.500083	0.60939
5.62333	1.92086	6.35625	1.0767	0.479542			5.62333	1.76986	4.01621	0.500804	0.608515
5.62667	1.92086	6.35821	1.0791	0.47877			5.62667	1.77106	4.02181	0.500583	0.614924
5.63	1.92301	6.35655	1.08126	0.478134			5.63	1.77324	4.02205	0.498229	0.611804
5.63333	1.9258	6.35377	1.07926	0.480417			5.63333	1.77582	4.02253	0.502606	0.613676
5.63667	1.92979	6.34915	1.07579	0.479371			5.63667	1.77379	4.01654	0.506608	0.612384
5.64	1.93001	6.34436	1.07551	0.480194			5.64	1.77131	4.01662	0.506088	0.611078
5.64333	1.93214	6.34201	1.07419	0.481135			5.64333	1.78684	4.02355	0.503077	0.615016
5.64667	1.93271	6.34386	1.07053	0.47945			5.64667	1.77462	4.01764	0.505634	0.618586
5.65	1.93392	6.34682	1.07053	0.481154			5.65	1.77785	4.01999	0.498851	0.610181
5.65333	1.93403	6.35048	1.07119	0.4807			5.65333	1.77781	4.02088	0.498094	0.613541
5.65667	1.93387	6.35686	1.0727	0.481967			5.65667	1.77648	4.01702	0.502731	0.610917
5.66	1.93279	6.35864	1.07303	0.480686			5.66	1.77789	4.02473	0.50654	0.615206
5.66333	1.93599	6.36038	1.07639	0.480612			5.66333	1.78614	4.02232	0.500817	0.609979
5.66667	1.93556	6.35819	1.07775	0.477495			5.66667	1.7828	4.02172	0.502891	0.610148
5.67	1.93601	6.3595	1.07939	0.480828			5.67	1.77735	4.01587	0.500013	0.609288
5.67333	1.93743	6.35853	1.08122	0.481064			5.67333	1.78595	4.02516	0.499703	0.609356
5.67667	1.93943	6.3591	1.08027	0.482342			5.67667	1.77665	4.02321	0.501856	0.608988
5.68	1.93713	6.35892	1.07976	0.485663			5.68	1.78535	4.03026	0.50499	0.613777
5.68333	1.9396	6.36	1.07646	0.486682			5.68333	1.78431	4.02621	0.500326	0.60969
5.68667	1.94036	6.36245	1.07385	0.486322			5.68667	1.77887	4.02296	0.500804	0.60834
5.69	1.94205	6.36165	1.07038	0.487659			5.69	1.78478	4.02426	0.501869	0.604638
5.69333	1.9442	6.3631	1.07133	0.4887			5.69333	1.78352	4.0245	0.501474	0.610684
5.69667	1.9472	6.36429	1.07206	0.489646			5.69667	1.78774	4.02465	0.497781	0.610983
5.7	1.94896	6.36372	1.07499	0.488375			5.7	1.78456	4.02191	0.500086	0.60863
5.70333	1.95064	6.36368	1.07541	0.48681			5.70333	1.78802	4.02598	0.49628	0.610825
5.70667	1.95376	6.36715	1.0789	0.485969			5.70667	1.78913	4.02579	0.50607	0.608099
5.71	1.95364	6.36756	1.07871	0.485179			5.71	1.78606	4.02509	0.501374	0.613876
5.71333	1.95466	6.36619	1.07816	0.48012			5.71333	1.78814	4.02301	0.500952	0.60657
5.71667	1.95541	6.36889	1.07774	0.482446			5.71667	1.7875	4.02302	0.502756	0.609984
5.72	1.95523	6.37088	1.08079	0.483101			5.72	1.79254	4.02583	0.49931	0.609249
5.72333	1.95519	6.36776	1.0822	0.481563			5.72333	1.79318	4.02989	0.499305	0.605314
5.72667	1.96003	6.36634	1.08603	0.478133			5.72667	1.79004	4.02825	0.503376	0.607581
5.73	1.96113	6.36696	1.08458	0.480586			5.73	1.78995	4.0327	0.498249	0.608026
5.73333	1.96276	6.37032	1.08315	0.480385			5.73333	1.79141	4.02479	0.503809	0.604277
5.73667	1.96542	6.37017	1.08555	0.477039			5.73667	1.79445	4.03385	0.499306	0.610962
5.74	1.96727	6.36923	1.08323	0.478339			5.74	1.79645	4.03048	0.498129	0.607167
5.74333	1.96693	6.37123	1.07991	0.48022			5.74333	1.7954	4.0284	0.496872	0.599566
5.74667	1.96669	6.37513	1.08583	0.480218			5.74667	1.7937	4.03346	0.4982	0.606308
5.75	1.96766	6.37275	1.08706	0.479254			5.75	1.79225	4.02556	0.500653	0.611488
5.75333	1.96859	6.37342	1.08641	0.481964			5.75333	1.79352	4.03116	0.500949	0.604549
5.75667	1.97064	6.37206	1.08941	0.484022			5.75667	1.79221	4.03093	0.501419	0.606967
5.76	1.97142	6.37578	1.09009	0.484924			5.76	1.80064	4.02791	0.499913	0.604348
5.76333	1.976	6.37765	1.08551	0.484188			5.76333	1.79986	4.03023	0.494557	0.606817
5.76667	1.97664	6.37823	1.08575	0.481569			5.76667	1.80297	4.03208	0.499725	0.605129
5.77	1.97779	6.37722	1.08614	0.482317			5.77	1.79795	4.03395	0.492974	0.607265
5.77333	1.97828	6.38243	1.08369	0.481343			5.77333	1.80022	4.03158	0.498229	0.605761
5.77667	1.97909	6.38038	1.08017	0.47882			5.77667	1.8052	4.03376	0.498785	0.608153
5.78	1.97776	6.3771	1.08144	0.479545			5.78	1.80348	4.03272	0.489661	0.605855
5.78333	1.97959	6.37651	1.08117	0.483589			5.78333	1.80301	4.0321	0.494761	0.603695
5.78667	1.98007	6.37439	1.07793	0.482463			5.78667	1.80638	4.03321	0.500913	0.603285
5.79	1.98002	6.37449	1.07798	0.477097			5.79	1.80237	4.03176	0.497831	0.602513
5.79333	1.98241	6.37867	1.08373	0.478631			5.79333	1.79893	4.03178	0.502422	0.607424
5.79667	1.98688	6.38097	1.08242	0.479957			5.79667	1.79867	4.03607	0.496449	0.601547
5.8	1.98632	6.38515	1.08001	0.476729			5.8	1.80228	4.03788	0.500251	0.605804
5.80333	1.98782	6.38903	1.08089	0.477434			5.80333	1.80509	4.02915	0.499482	0.609207
5.80667	1.98899	6.39225	1.08375	0.479088			5.80667	1.79927	4.03443	0.503393	0.605153
5.81	1.98798	6.39096	1.08287	0.47961			5.81	1.80327	4.03398	0.499304	0.603861
5.81333	1.98647	6.39077	1.08386	0.476039			5.81333	1.80697	4.03599	0.500931	0.606696
5.81667	1.98759	6.38914	1.08727	0.477226			5.81667	1.80856	4.03492	0.498253	0.601782
5.82	1.99074	6.38945	1.08814	0.475797			5.82	1.80825	4.03423	0.497773	0.602159
5.82333	1.99077	6.38876	1.08654	0.477452			5.82333	1.80763	4.0323	0.493996	0.603371
5.82667	1.99387	6.38941	1.08714	0.474988			5.82667	1.81048	4.04027	0.498748	0.6035
5.83	1.99589	6.3893	1.0861	0.475505			5.83	1.80937	4.03637	0.49663	0.601453
5.83333	1.9964	6.39293	1.08428	0.475043			5.83333	1.80733	4.04096	0.495834	0.605732
5.83667	1.99483	6.39492	1.08074	0.475982			5.83667	1.81061	4.03467	0.497458	0.60249
5.84	1.99632	6.39458	1.07945	0.47776			5.84	1.81617	4.03762	0.49977	0.604893
5.84333	1.99591	6.39627	1.07868	0.479206			5.84333	1.80639	4.03673	0.49555	0.605562
5.84667	1.99575	6.399	1.07916	0.480685			5.84667	1.80836	4.04158	0.496385	0.601635
5.85	1.99815	6.39842	1.08107	0.479058			5.85	1.81239	4.03929	0.499487	0.601635
5.85333	2.00071	6.39897	1.08575	0.477814			5.85333	1.8118	4.04042	0.496426	0.60366
5.85667	2.00377	6.39943	1.08546	0.475226			5.85667	1.81394	4.04374	0.494324	0.599865
5.86	2.00446	6.39785	1.08632	0.475102			5.86	1.81821	4.04291	0.494294	0.604865
5.86333	2.00659	6.39818	1.08599	0.474451			5.86333	1.81648	4.04162	0.499626	0.59627
5.86667	2.00687	6.39952	1.08506	0.474642			5.86667	1.81017	4.04207	0.500925	0.596125
5.87	2.00787	6.39761	1.08112	0.47545			5.87	1.81492	4.04772	0.497343	0.603943
5.87333	2.00804	6.39749	1.08119	0.47587			5.87333	1.82109	4.03631	0.495512	0.599342
5.87667	2.00948	6.39821	1.07968	0.479254			5.87667	1.81751	4.04268	0.49688	0.604552
5.88	2.00862	6.39986	1.08123	0.478676			5.88	1.82142	4.03761	0.496669	0.605565
5.88333	2.00988	6.40026	1.08341	0.476174			5.88333	1.80874	4.04138	0.495793	0.599799
5.88667	2.00982	6.40411	1.08674	0.474725			5.88667	1.82489	4.04151	0.495307	0.602457
5.89	2.01104	6.40753	1.08833	0.474567			5.89	1.81835	4.04333	0.499047	0.60493
5.89333	2.01223	6.40926	1.08734	0.470787			5.89333	1.82026	4.04551	0.496359	0.602442
5.89667	2.01509	6.40887	1.08853	0.470675			5.89667	1.82185	4.04261	0.495218	0.602906
5.9	2.01811	6.40896	1.08492	0.472779			5.9	1.82083	4.03931	0.491395	0.601061
5.90333	2.02033	6.40743	1.08302	0.472589			5.90333	1.82223	4.04698	0.495425	0.595005
5.90667	2.02108	6.40541	1.08032	0.472194			5.90667	1.81967	4.05023	0.493901	0.597484
5.91	2.02298	6.40631	1.07896	0.473377			5.91	1.82579	4.04542	0.500352	0.599269
5.91333	2.02358	6.40695	1.07754	0.476739			5.91333	1.82923	4.0479	0.497062	0.601361
5.91667	2.02266	6.40865	1.07826	0.478666			5.91667	1.79405	4.04593	0.497242	0.601321
5.92	2.02331	6.40845	1.08159	0.47898			5.92	1.8121	4.0509	0.495494	0.600386
5.92333	2.02629	6.4115	1.08306	0.478918			5.92333	1.83274	4.04459	0.494621	0.602662
5.92667	2.02464	6.4106	1.08593	0.477784			5.92667	1.82112	4.04593	0.49142	0.599266
5.93	2.02663	6.40871	1.08613	0.475198			5.93	1.82543	4.04596	0.495249	0.601801
5.93333	2.02952	6.40494	1.08519	0.475306			5.93333	1.83085	4.04548	0.492143	0.59513
5.93667	2.03127	6.40708	1.0795	0.475884			5.93667	1.82582	4.04724	0.494237	0.602465
5.94	2.03152	6.40857	1.07677	0.476966			5.94	1.8266	4.04596	0.496443	0.596847
5.94333	2.03634	6.41094	1.07343	0.477727			5.94333	1.8328	4.04798	0.493654	0.598327
5.94667	2.03687	6.41412	1.07213	0.478842			5.94667	1.829	4.04648	0.491542	0.598037
5.95	2.03745	6.41523	1.07216	0.477872			5.95	1.82821	4.04707	0.495035	0.598675
5.95333	2.03612	6.41704	1.07735	0.477278			5.95333	1.83222	4.04952	0.493431	0.599107
5.95667	2.03768	6.41551	1.08207	0.478235			5.95667	1.83315	4.05015	0.492888	0.60172
5.96	2.0385	6.41434	1.08519	0.480528			5.96	1.83392	4.04944	0.492629	0.599287
5.96333	2.04004	6.41398	1.0884	0.480421			5.96333	1.83031	4.05033	0.496605	0.601661
5.96667	2.04115	6.41661	1.08943	0.479892			5.96667	1.83406	4.04798	0.493579	0.599642
5.97	2.04293	6.4163	1.08903	0.482044			5.97	1.82883	4.05002	0.487215	0.596291
5.97333	2.04252	6.41779	1.09039	0.480679			5.97333	1.82781	4.0544	0.491034	0.604905
5.97667	2.04321	6.41966	1.08881	0.477639			5.97667	1.83942	4.05007	0.495274	0.597124
5.98	2.04393	6.42009	1.08403	0.475634			5.98	1.82952	4.04814	0.493655	0.603133
5.98333	2.04445	6.42227	1.08383	0.473457			5.98333	1.84414	4.0492	0.491858	0.596414
5.98667	2.04617	6.42191	1.08501	0.471355			5.98667	1.83394	4.04906	0.49399	0.597938
5.99	2.04631	6.42176	1.08245	0.469946			5.99	1.83446	4.0522	0.491915	0.59521
5.99333	2.04499	6.42112	1.0822	0.469326			5.99333	1.83677	4.05201	0.494035	0.595344
5.99667	2.04663	6.42422	1.0837	0.468041			5.99667	1.83265	4.05195	0.488352	0.598496
6	2.04883	6.4244	1.0847	0.474225			6	1.83761	4.057	0.492639	0.592135
6.00333	2.05183	6.4264	1.07894	0.4747			6.00333	1.83975	4.05192	0.489686	0.59975
6.00667	2.05318	6.42615	1.07667	0.472675			6.00667	1.83815	4.05873	0.488692	0.595648
6.01	2.0555	6.42664	1.07686	0.475129			6.01	1.84594	4.05542	0.491735	0.592651
6.01333	2.054	6.42585	1.07647	0.476639			6.01333	1.84371	4.05462	0.490928	0.597593
6.01667	2.05367	6.42607	1.0765	0.471969			6.01667	1.84384	4.05151	0.495631	0.597105
6.02	2.05476	6.42524	1.08182	0.470829			6.02	1.84555	4.05262	0.493469	0.595689
6.02333	2.05614	6.42333	1.08389	0.470367			6.02333	1.84201	4.05649	0.493058	0.592315
6.02667	2.05663	6.42402	1.08247	0.470008			6.02667	1.84752	4.05682	0.492991	0.593369
6.03	2.05856	6.42261	1.08458	0.46895			6.03	1.84148	4.05436	0.487222	0.594741
6.03333	2.05958	6.42438	1.08342	0.467623			6.03333	1.84357	4.05647	0.495012	0.593911
6.03667	2.05887	6.42742	1.0793	0.469109			6.03667	1.84929	4.0542	0.488351	0.597225
6.04	2.05881	6.43218	1.07491	0.471848			6.04	1.85013	4.0571	0.488191	0.600764
6.04333	2.06098	6.43125	1.08003	0.47005			6.04333	1.85241	4.05537	0.49041	0.596943
6.04667	2.0642	6.43634	1.08084	0.471091			6.04667	1.84655	4.05842	0.491595	0.593364
6.05	2.06428	6.43516	1.08235	0.469076			6.05	1.85079	4.05758	0.490574	0.599287
6.05333	2.06795	6.43432	1.08006	0.467479			6.05333	1.84836	4.05079	0.489263	0.596181
6.05667	2.07121	6.43503	1.08318	0.467631			6.05667	1.85083	4.06034	0.492218	0.598182
6.06	2.07157	6.43675	1.08057	0.467005			6.06	1.84998	4.05559	0.494738	0.598726
6.06333	2.07203	6.43447	1.07941	0.465205			6.06333	1.85094	4.05357	0.490427	0.591856
6.06667	2.07424	6.43691	1.08006	0.465958			6.06667	1.84878	4.06581	0.48776	0.595459
6.07	2.07565	6.43751	1.07941	0.465755			6.07	1.84762	4.05942	0.489116	0.595973
6.07333	2.07681	6.43812	1.08129	0.463668			6.07333	1.85006	4.06096	0.490007	0.59273
6.07667	2.08061	6.43898	1.07779	0.463173			6.07667	1.84876	4.06095	0.489854	0.595803
6.08	2.08059	6.43715	1.07826	0.464139			6.08	1.8554	4.06428	0.489082	0.598077
6.08333	2.0821	6.43761	1.07435	0.468778			6.08333	1.84866	4.05673	0.489613	0.597657
6.08667	2.08248	6.43795	1.07526	0.469414			6.08667	1.85426	4.06334	0.49009	0.593194
6.09	2.08281	6.43817	1.07582	0.472199			6.09	1.85103	4.06389	0.487216	0.594166
6.09333	2.08268	6.43759	1.0799	0.475479			6.09333	1.85052	4.05997	0.490464	0.594148
6.09667	2.08295	6.4399	1.07915	0.474811			6.09667	1.86058	4.06573	0.488058	0.593901
6.1	2.0836	6.44076	1.08356	0.472311			6.1	1.85596	4.05597	0.488307	0.597737
6.10333	2.08512	6.44274	1.08591	0.472268			6.10333	1.85655	4.05521	0.483452	0.596451
6.10667	2.08632	6.44427	1.08228	0.471882			6.10667	1.85145	4.05715	0.488586	0.594318
6.11	2.08741	6.44709	1.07899	0.466363			6.11	1.85718	4.06372	0.490468	0.598013
6.11333	2.08929	6.44894	1.07742	0.46839			6.11333	1.85917	4.05898	0.487783	0.597137
6.11667	2.09188	6.44869	1.07641	0.47076			6.11667	1.86355	4.06205	0.491715	0.598166
6.12	2.09385	6.44878	1.07349	0.471979			6.12	1.86184	4.06232	0.486748	0.591673
6.12333	2.09388	6.44817	1.076	0.470045			6.12333	1.86432	4.05904	0.484376	0.589831
6.12667	2.095	6.44685	1.07797	0.473809			6.12667	1.86099	4.06745	0.487798	0.588494
6.13	2.09671	6.44762	1.0781	0.474914			6.13	1.85971	4.07147	0.487463	0.594779
6.13333	2.09765	6.4495	1.07843	0.470658			6.13333	1.85946	4.06784	0.484222	0.588274
6.13667	2.0957	6.44864	1.08645	0.47014			6.13667	1.86627	4.06623	0.487829	0.591343
6.14	2.09874	6.44744	1.08799	0.470191			6.14	1.86089	4.06212	0.486332	0.591305
6.14333	2.10047	6.45101	1.08686	0.471067			6.14333	1.86095	4.06198	0.487672	0.589163
6.14667	2.10151	6.45056	1.08814	0.467645			6.14667	1.86082	4.06617	0.484048	0.591302
6.15	2.10325	6.45068	1.08609	0.467701			6.15	1.86661	4.07054	0.487202	0.593557
6.15333	2.10646	6.45135	1.08175	0.467749			6.15333	1.86252	4.07097	0.48537	0.592738
6.15667	2.10752	6.45314	1.08038	0.46811			6.15667	1.86275	4.06789	0.491517	0.59135
6.16	2.10709	6.45248	1.08176	0.467784			6.16	1.86489	4.06301	0.485733	0.594871
6.16333	2.10902	6.453	1.08104	0.467494			6.16333	1.86633	4.06939	0.487881	0.589756
6.16667	2.10804	6.45265	1.08182	0.468021			6.16667	1.86625	4.0664	0.489033	0.590112
6.17	2.10861	6.45311	1.08211	0.466875			6.17	1.86354	4.06414	0.484081	0.588944
6.17333	2.10976	6.45437	1.07994	0.466603			6.17333	1.86812	4.06812	0.491676	0.591478
6.17667	2.11178	6.45339	1.08276	0.465122			6.17667	1.86664	4.06939	0.486413	0.592482
6.18	2.11222	6.45391	1.08484	0.465399			6.18	1.86977	4.0676	0.485041	0.592504
6.18333	2.11379	6.45479	1.08509	0.469204			6.18333	1.86984	4.06483	0.485466	0.594661
6.18667	2.11441	6.4563	1.08031	0.470998			6.18667	1.87426	4.06888	0.484496	0.587341
6.19	2.11532	6.45461	1.07829	0.472167			6.19	1.86673	4.06967	0.484702	0.594733
6.19333	2.11522	6.45583	1.07647	0.475025			6.19333	1.8679	4.06501	0.487501	0.597335
6.19667	2.1164	6.45633	1.0767	0.477979			6.19667	1.87123	4.06977	0.491807	0.586965
6.2	2.11845	6.45602	1.077	0.474237			6.2	1.86354	4.07086	0.484045	0.589904
6.20333	2.11899	6.45796	1.08214	0.471347			6.20333	1.87073	4.06878	0.484669	0.589737
6.20667	2.1182	6.46143	1.08654	0.471311			6.20667	1.87709	4.07612	0.488205	0.589282
6.21	2.11886	6.46538	1.08525	0.467865			6.21	1.87274	4.07316	0.48608	0.589961
6.21333	2.12118	6.46973	1.08008	0.466913			6.21333	1.86947	4.07524	0.484417	0.588121
6.21667	2.12097	6.47154	1.0772	0.471388			6.21667	1.87558	4.07209	0.481778	0.592881
6.22	2.12273	6.47225	1.07729	0.473481			6.22	1.871	4.0722	0.487509	0.593267
6.22333	2.124	6.47096	1.07702	0.46903			6.22333	1.87214	4.0702	0.484976	0.591539
6.22667	2.12549	6.46918	1.07803	0.47052			6.22667	1.8779	4.06843	0.484998	0.592369
6.23	2.12421	6.46751	1.08211	0.466727			6.23	1.86667	4.07465	0.484598	0.58809
6.23333	2.1254	6.47119	1.08555	0.465824			6.23333	1.8754	4.07875	0.481909	0.589139
6.23667	2.12658	6.47138	1.08383	0.465308			6.23667	1.8748	4.06927	0.487358	0.587698
6.24	2.12676	6.473	1.08415	0.470512			6.24	1.87622	4.07412	0.482699	0.591444
6.24333	2.12594	6.46984	1.08267	0.469719			6.24333	1.87764	4.07491	0.483923	0.595867
6.24667	2.12734	6.46972	1.08087	0.472412			6.24667	1.88068	4.06665	0.485105	0.592423
6.25	2.12986	6.46667	1.08005	0.467875			6.25	1.88234	4.07385	0.485955	0.589233
6.25333	2.13123	6.46639	1.07983	0.467129			6.25333	1.8831	4.07344	0.482799	0.585514
6.25667	2.13359	6.46623	1.07959	0.467198			6.25667	1.87697	4.07652	0.487869	0.592334
6.26	2.13588	6.47041	1.08188	0.466945			6.26	1.88009	4.07713	0.486476	0.590784
6.26333	2.13925	6.47165	1.08219	0.464149			6.26333	1.87767	4.07405	0.489531	0.589488
6.26667	2.13802	6.47005	1.08037	0.465711			6.26667	1.88045	4.0753	0.482296	0.588972
6.27	2.13945	6.46976	1.0839	0.463583			6.27	1.87686	4.06989	0.483487	0.591346
6.27333	2.13666	6.468	1.08201	0.462891			6.27333	1.87738	4.07384	0.480834	0.58371
6.27667	2.13868	6.46828	1.07749	0.461036			6.27667	1.88582	4.07817	0.484598	0.592265
6.28	2.13803	6.46729	1.0782	0.462996			6.28	1.88222	4.07463	0.482872	0.587685
6.28333	2.14032	6.46704	1.07879	0.462785			6.28333	1.8839	4.07398	0.484381	0.589332
6.28667	2.14032	6.46611	1.07091	0.463986			6.28667	1.88735	4.07603	0.491438	0.592903
6.29	2.14363	6.47023	1.07209	0.46142			6.29	1.88562	4.08092	0.485259	0.592613
6.29333	2.14437	6.47249	1.07155	0.462901			6.29333	1.88543	4.08049	0.480178	0.58465
6.29667	2.14678	6.47479	1.06811	0.464424			6.29667	1.88421	4.0887	0.484421	0.590918
6.3	2.14687	6.4774	1.07172	0.463307			6.3	1.88706	4.08189	0.485224	0.590667
6.30333	2.14734	6.4778	1.07404	0.46404			6.30333	1.88882	4.07263	0.482147	0.590086
6.30667	2.1485	6.47608	1.07543	0.464992			6.30667	1.88608	4.08027	0.482544	0.585568
6.31	2.15115	6.47482	1.08099	0.466503			6.31	1.88539	4.07353	0.483707	0.586894
6.31333	2.15135	6.47499	1.08437	0.466266			6.31333	1.8856	4.07504	0.485155	0.589951
6.31667	2.15148	6.47516	1.0814	0.465485			6.31667	1.88693	4.07513	0.482879	0.587185
6.32	2.15451	6.47876	1.08234	0.464731			6.32	1.89267	4.07643	0.482719	0.583755
6.32333	2.15648	6.48259	1.07975	0.465825			6.32333	1.88998	4.07241	0.479832	0.58503
6.32667	2.15622	6.48317	1.07373	0.463345			6.32667	1.88654	4.08385	0.482768	0.592075
6.33	2.15689	6.48269	1.07198	0.465108			6.33	1.89082	4.07758	0.481037	0.587766
6.33333	2.15992	6.48276	1.07519	0.465722			6.33333	1.89569	4.08171	0.479772	0.588708
6.33667	2.16279	6.47882	1.07613	0.465034			6.33667	1.89124	4.07861	0.481915	0.586628
6.34	2.16419	6.475	1.07561	0.465536			6.34	1.89096	4.08408	0.482512	0.590261
6.34333	2.16495	6.4738	1.08144	0.465435			6.34333	1.89141	4.08103	0.483776	0.588128
6.34667	2.16658	6.47384	1.08212	0.460911			6.34667	1.89201	4.08123	0.477018	0.587664
6.35	2.16672	6.47643	1.07811	0.461956			6.35	1.89584	4.07953	0.483965	0.588765
6.35333	2.16556	6.48255	1.07832	0.463589			6.35333	1.89461	4.0806	0.482694	0.586365
6.35667	2.16758	6.48654	1.07863	0.462706			6.35667	1.89204	4.07945	0.484053	0.585685
6.36	2.16927	6.48727	1.07337	0.46268			6.36	1.88834	4.08082	0.484147	0.585416
6.36333	2.16959	6.49032	1.07487	0.463741			6.36333	1.89842	4.07951	0.484541	0.581203
6.36667	2.17113	6.49038	1.07711	0.46466			6.36667	1.89292	4.07759	0.481424	0.589073
6.37	2.17125	6.48897	1.07988	0.465753			6.37	1.89724	4.08506	0.482284	0.581922
6.37333	2.17224	6.48802	1.07983	0.464852			6.37333	1.89334	4.0784	0.485758	0.588735
6.37667	2.17361	6.49247	1.08275	0.46643			6.37667	1.9003	4.08489	0.484509	0.585794
6.38	2.17248	6.49078	1.08131	0.464823			6.38	1.89871	4.08447	0.483105	0.58471
6.38333	2.17385	6.49344	1.07969	0.465939			6.38333	1.89382	4.08085	0.483048	0.579986
6.38667	2.1755	6.49457	1.07308	0.465585			6.38667	1.90647	4.08556	0.482319	0.582314
6.39	2.17393	6.49499	1.07407	0.468018			6.39	1.89505	4.07469	0.482728	0.587304
6.39333	2.17292	6.4939	1.07209	0.467094			6.39333	1.90297	4.08437	0.480179	0.585139
6.39667	2.17627	6.49505	1.07404	0.472001			6.39667	1.89856	4.08529	0.480583	0.584952
6.4	2.17847	6.49195	1.07889	0.470208			6.4	1.90177	4.08928	0.480812	0.584532
6.40333	2.17986	6.49252	1.08238	0.469071			6.40333	1.90148	4.08388	0.479086	0.580626
6.40667	2.18233	6.49527	1.08125	0.465253			6.40667	1.90374	4.084	0.481006	0.58466
6.41	2.18591	6.49398	1.08506	0.466697			6.41	1.90372	4.08127	0.483057	0.581473
6.41333	2.18525	6.49399	1.08514	0.464346			6.41333	1.90064	4.0829	0.48379	0.58208
6.41667	2.18449	6.49477	1.08106	0.466957			6.41667	1.90575	4.08646	0.477502	0.583159
6.42	2.18511	6.49405	1.08385	0.467949			6.42	1.90462	4.08802	0.477229	0.587166
6.42333	2.18789	6.49405	1.08564	0.469012			6.42333	1.90747	4.08554	0.480865	0.585324
6.42667	2.18683	6.4965	1.08625	0.467015			6.42667	1.90725	4.08525	0.479738	0.585483
6.43	2.18847	6.49685	1.08895	0.463425			6.43	1.90114	4.08396	0.476561	0.587429
6.43333	2.18957	6.49884	1.08766	0.459561			6.43333	1.9103	4.08077	0.482751	0.58164
6.43667	2.19127	6.5017	1.08888	0.457376			6.43667	1.90542	4.08738	0.475527	0.585242
6.44	2.19128	6.50286	1.08867	0.457087			6.44	1.91038	4.08793	0.479955	0.580258
6.44333	2.19303	6.50291	1.08968	0.457043			6.44333	1.90353	4.09175	0.48222	0.583584
6.44667	2.19451	6.50238	1.08424	0.459105			6.44667	1.90757	4.0874	0.477661	0.58421
6.45	2.19467	6.50348	1.08633	0.459017			6.45	1.91158	4.08299	0.476996	0.584034
6.45333	2.19657	6.50024	1.08324	0.458605			6.45333	1.90919	4.09367	0.480656	0.584659
6.45667	2.19887	6.4981	1.08224	0.459628			6.45667	1.90891	4.0851	0.476836	0.584763
6.46	2.19901	6.49869	1.07916	0.458975			6.46	1.9155	4.08646	0.477873	0.578783
6.46333	2.1978	6.50257	1.08348	0.460148			6.46333	1.90739	4.08971	0.48693	0.577852
6.46667	2.19939	6.50436	1.0818	0.459909			6.46667	1.90863	4.08659	0.476279	0.580025
6.47	2.19944	6.50602	1.08373	0.462199			6.47	1.9123	4.08801	0.477708	0.579961
6.47333	2.20031	6.51115	1.08054	0.461699			6.47333	1.91846	4.09028	0.481394	0.578885
6.47667	2.20152	6.51342	1.07744	0.462591			6.47667	1.91363	4.0936	0.48143	0.580248
6.48	2.20543	6.51539	1.07179	0.462872			6.48	1.91619	4.08842	0.48167	0.583543
6.48333	2.20801	6.51436	1.07607	0.461424			6.48333	1.91651	4.09305	0.475112	0.580843
6.48667	2.20956	6.51644	1.07465	0.459455			6.48667	1.92562	4.09293	0.483227	0.57885
6.49	2.20872	6.51399	1.07922	0.458331			6.49	1.91161	4.09509	0.477589	0.5746
6.49333	2.20975	6.51179	1.08067	0.458183			6.49333	1.91714	4.08921	0.473743	0.578767
6.49667	2.20998	6.50933	1.08634	0.454406			6.49667	1.9146	4.09565	0.474012	0.577589
6.5	2.2101	6.51424	1.08193	0.457064			6.5	1.91097	4.09221	0.476965	0.577531
6.50333	2.21065	6.51554	1.08059	0.458084			6.50333	1.91864	4.09065	0.475448	0.585028
6.50667	2.21199	6.51338	1.07883	0.459142			6.50667	1.9108	4.08864	0.478844	0.583864
6.51	2.21248	6.51346	1.07936	0.460794			6.51	1.91892	4.0906	0.478967	0.582348
6.51333	2.21168	6.51561	1.07642	0.46339			6.51333	1.91952	4.08669	0.476343	0.579596
6.51667	2.21264	6.51084	1.07731	0.460582			6.51667	1.91375	4.0897	0.476371	0.579736
6.52	2.21284	6.5106	1.078	0.462196			6.52	1.91807	4.10287	0.473057	0.583425
6.52333	2.21482	6.51284	1.07511	0.461113			6.52333	1.92055	4.09168	0.475268	0.574456
6.52667	2.21703	6.51729	1.07466	0.45721			6.52667	1.91397	4.09369	0.477575	0.579342
6.53	2.22009	6.516	1.07564	0.459545			6.53	1.92116	4.08773	0.476946	0.581786
6.53333	2.21962	6.51801	1.07806	0.464072			6.53333	1.92316	4.09566	0.474306	0.582632
6.53667	2.22091	6.5186	1.08087	0.4614			6.53667	1.91789	4.09911	0.473159	0.583056
6.54	2.22032	6.52018	1.0843	0.461013			6.54	1.9227	4.09531	0.479859	0.581281
6.54333	2.22092	6.51786	1.08492	0.46344			6.54333	1.91675	4.09448	0.473086	0.581522
6.54667	2.22048	6.51798	1.08472	0.457821			6.54667	1.92057	4.09438	0.475424	0.58454
6.55	2.22271	6.51658	1.08182	0.452947			6.55	1.92343	4.09472	0.473016	0.581213
6.55333	2.22436	6.51548	1.07699	0.451314			6.55333	1.92052	4.09724	0.475101	0.573706
6.55667	2.22642	6.515	1.07625	0.453385			6.55667	1.91735	4.09653	0.472131	0.575353
6.56	2.22838	6.51435	1.07853	0.453374			6.56	1.92326	4.10266	0.47223	0.585376
6.56333	2.23061	6.51745	1.08032	0.456991			6.56333	1.92531	4.09633	0.472302	0.576543
6.56667	2.22887	6.51872	1.07904	0.457503			6.56667	1.92607	4.09863	0.476167	0.577332
6.57	2.23035	6.52198	1.08301	0.45826			6.57	1.92897	4.09595	0.474668	0.577682
6.57333	2.22996	6.51974	1.08393	0.456872			6.57333	1.92248	4.09489	0.471977	0.580651
6.57667	2.22981	6.52029	1.07756	0.455763			6.57667	1.92935	4.10004	0.473754	0.580858
6.58	2.23197	6.51881	1.07471	0.456176			6.58	1.92334	4.09564	0.469666	0.578353
6.58333	2.23459	6.52263	1.07951	0.454129			6.58333	1.92443	4.10619	0.471974	0.580204
6.58667	2.23452	6.52459	1.07638	0.45284			6.58667	1.92818	4.09839	0.47472	0.574546
6.59	2.23627	6.52857	1.07744	0.452715			6.59	1.92393	4.10028	0.47264	0.579099
6.59333	2.23792	6.53006	1.08051	0.452682			6.59333	1.92282	4.10346	0.475654	0.574585
6.59667	2.23707	6.53143	1.08172	0.451955			6.59667	1.92607	4.10225	0.473978	0.576173
6.6	2.23859	6.53282	1.07825	0.457074			6.6	1.93206	4.09869	0.477043	0.572039
6.60333	2.2396	6.53121	1.08016	0.460437			6.60333	1.93386	4.10237	0.472801	0.57591
6.60667	2.24139	6.53036	1.07997	0.461828			6.60667	1.93071	4.10409	0.473546	0.577507
6.61	2.24099	6.53398	1.08297	0.464361			6.61	1.92691	4.10412	0.472086	0.577936
6.61333	2.24187	6.53463	1.08096	0.464764			6.61333	1.92944	4.09642	0.47653	0.57689
6.61667	2.24397	6.53433	1.08248	0.463795			6.61667	1.92341	4.10141	0.472077	0.582104
6.62	2.2456	6.53184	1.07869	0.462627			6.62	1.9336	4.10264	0.472989	0.576497
6.62333	2.24532	6.53622	1.08059	0.461207			6.62333	1.92774	4.09991	0.476863	0.576175
6.62667	2.24833	6.53591	1.07966	0.456913			6.62667	1.92876	4.09888	0.472356	0.579152
6.63	2.25195	6.53674	1.08259	0.458603			6.63	1.92491	4.09725	0.471106	0.57705
6.63333	2.25232	6.53673	1.08416	0.457823			6.63333	1.92719	4.09793	0.473341	0.574546
6.63667	2.25276	6.54047	1.09014	0.460043			6.63667	1.93598	4.10028	0.469008	0.575911
6.64	2.25613	6.53804	1.08911	0.460461			6.64	1.93224	4.09385	0.469563	0.576938
6.64333	2.25591	6.53926	1.08956	0.463021			6.64333	1.93287	4.10449	0.477832	0.575209
6.64667	2.25525	6.53907	1.08829	0.462096			6.64667	1.92874	4.0984	0.473731	0.577614
6.65	2.25633	6.54062	1.08706	0.46395			6.65	1.93158	4.10448	0.470863	0.577039
6.65333	2.25835	6.54174	1.08516	0.46496			6.65333	1.94055	4.10276	0.475369	0.578166
6.65667	2.25784	6.5431	1.0866	0.463731			6.65667	1.93782	4.10416	0.477818	0.571348
[truncated: 7,152 more rows]
