# Supplementary material for: Early steps of protein disaggregation by Hsp70 chaperone and class B J-domain proteins are shaped by Hsp110
Source: eLife. 2024 Oct 15;13:RP94795. doi: 10.7554/eLife.94795 (PMC11479587; doi:10.7554/eLife.94795)
Supplement: Figure 1—figure supplement 1—source data 7. [file elife-94795-fig1-figsupp1-data7.xlsx]

## Sheet: Figure 1—figure supplement 1G 
Time (min)	Ydj1	Ydj1, Sse1	Sis1	Sis1, Sse1	Sse1	Ssa1	Ssa1, Sse1		Time (min)	Ydj1	Ydj1, Sse1	Sis1	Sis1, Sse1	Sse1	Ssa1	Ssa1, Sse1
0	0	0	0	0	0	0	0		0	0	0	0	0	0	0	0
0.00333333	0.00240795	-0.00506132	-0.00027532	0.0012489	-0.00145353	0.00275854	0.00612179		0.00333333	0.00039762	0.0012452	0.00770806	-0.0033159	-0.00441506	-0.00138631	0.00694178
0.00666667	-0.00489403	-0.00882425	0.00025612	-0.00458661	-0.00148714	-0.00066998	0.00384103		0.00666667	0.00510638	-0.00025923	0.00905296	-0.00352952	-0.00319603	-0.00472106	-0.00484178
0.01	-9.347e-05	-0.00810102	-0.00032754	-0.00029123	-0.00040735	-0.00250017	0.0021228		0.01	0.00404204	-0.00068808	0.00544986	-0.00477878	-0.00225695	-0.00599944	-0.00674975
0.0133333	-0.00391336	-0.00548466	-0.00207817	0.00206757	0.00070158	-0.00610146	-0.00221272		0.0133333	-0.00212037	0.00265256	0.00504229	-0.0114898	-0.00391786	-0.0072969	-0.00136473
0.0166667	-0.00331371	-0.0043182	-0.00201801	-0.00266147	0.00095633	-0.00132574	-0.000802		0.0166667	0.00168961	-0.00198823	0.00486037	-0.00635912	-0.00345886	-0.0114891	-0.00236736
0.02	-0.00348888	-0.00265683	-0.00131684	0.00356571	0.00040848	-0.0078042	0.0019508		0.02	-0.00381681	-0.00454775	-0.00144414	-0.00870062	-0.00038567	-0.00913099	-0.00287673
0.0233333	-0.00019125	-0.00473281	-0.00338987	0.00143375	-0.00515229	-0.00906547	0.00281266		0.0233333	0.00242801	-0.00323298	0.00096722	-0.0123709	-0.0020528	-0.00883662	0.00050705
0.0266667	0.00094698	-0.00069643	-0.00048149	0.00202832	-0.00337789	-0.00334071	0.00188879		0.0266667	-0.00073529	-0.00519135	0.00281009	-0.00930474	0.00121495	-0.0125961	-0.00788719
0.03	0.00163645	-0.00182019	0.00106552	-0.00110502	-9.954e-05	-0.00625705	0.00202615		0.03	-0.00314865	-0.00405151	0.00077781	-0.0135133	-0.00252971	-0.00956705	-0.00440452
0.0333333	0.00090519	-0.00228291	0.00188631	0.00050647	-0.00041748	-0.00650238	0.00119584		0.0333333	-0.00173015	-0.00473665	-8.764e-05	-0.00848452	-0.00212417	-0.0115185	-0.00356543
0.0366667	0.00113805	-0.00277269	-0.00385934	0.00371136	0.00051433	-0.00529382	0.00359227		0.0366667	-0.0043803	-0.00106322	0.00169481	-0.00964069	-0.00193387	-0.0112759	-0.00246901
0.04	0.00199517	-0.0032798	-0.00198816	0.00199437	-0.00091136	-0.0110332	0.00944754		0.04	-0.00395343	-0.00154204	0.00011628	-0.00948107	0.00166261	-0.0119959	-0.00176513
0.0433333	0.0011667	-0.00335941	-0.00427059	-0.00178539	-0.002283	-0.0103387	0.00269296		0.0433333	-0.00077534	-0.00230328	-0.0014258	-0.0103122	-0.0044487	-0.0110833	-0.00465269
0.0466667	0.00034536	-0.00378478	-0.00207852	0.00255303	0.00056826	-0.00758961	0.00302323		0.0466667	-0.00294922	-0.00654523	-7.002e-05	-0.0122029	-0.00362995	-0.0124093	-0.00766463
0.05	0.00242164	-0.0029554	0.00428745	-0.00314418	-0.00076638	-0.00882506	0.00069026		0.05	-0.00083331	-0.00152548	-0.00063517	-0.00753298	0.00216629	-0.0142266	-0.00835339
0.0533333	0.00032905	-0.00440517	0.00200852	-0.00194479	-0.00139086	-0.00716236	0.00360195		0.0533333	-0.00620927	-0.00153068	0.00104054	-0.0115857	0.00041149	-0.0117444	-0.00185023
0.0566667	0.00039634	-0.00130008	0.00196166	0.00535573	0.00156933	-0.0102329	0.00351762		0.0566667	-0.0106411	-0.00312242	0.00133693	-0.0113719	-0.003597	-0.0103423	-0.00290357
0.06	0.00510169	-0.0012637	-0.0023617	-0.00146769	-0.00203125	-0.00990929	0.00042245		0.06	-0.00574146	-0.00381024	-0.00279526	-0.00878265	0.00038382	-0.013595	-0.0100657
0.0633333	-0.00351638	-0.00223858	-0.00576372	0.0035973	0.00171887	-0.00570309	0.00464064		0.0633333	-0.00362647	-0.00616277	0.00192212	-0.00773511	0.00347299	-0.0116499	-0.00480326
0.0666667	0.00028997	-0.00588198	-0.00183144	0.00239109	0.00163413	-0.014149	0.002884		0.0666667	-0.00519918	-0.00340857	-0.0010921	-0.00943752	0.00221974	-0.00938362	-0.00550368
0.07	0.0013547	-0.00157311	-0.00359495	-0.00020731	0.00026948	-0.0106119	0.00097425		0.07	-0.0038908	-0.0059464	-0.00727592	-0.0131729	-0.00302756	-0.0146534	-0.00717607
0.0733333	-0.0017094	-0.00073711	-0.00025735	0.00068675	0.00272669	-0.0105766	0.0008023		0.0733333	-0.0104966	-0.00444876	-0.00045732	-0.0151093	-0.00032658	-0.00911243	-0.00833609
0.0766667	-0.00290598	-0.00384536	-1.03e-05	0.00191884	0.00184563	-0.0127036	0.00282025		0.0766667	-0.00753349	-0.00131203	0.00016719	-0.00926943	0.00157885	-0.0111207	-0.0080912
0.08	-0.00170229	0.00028891	0.00035123	-0.00041776	-0.00283009	-0.010286	0.00247114		0.08	-0.0069433	-0.00479383	-0.00174845	-0.0102743	-0.00093583	-0.0109973	-0.00776349
0.0833333	0.00195311	-0.00548487	0.00072011	-0.00191334	0.00022497	-0.0134952	0.0022511		0.0833333	-0.00372663	-0.00736658	-0.00449262	-0.00942831	0.00195598	-0.0114821	-0.0103728
0.0866667	-0.00162816	-0.0022792	-0.00170385	0.0040456	-0.0002676	-0.0110679	0.00204023		0.0866667	-0.00701898	-0.0047971	-0.00227266	-0.0137472	-0.00325062	-0.0100805	-0.0117459
0.09	-0.00085125	-0.00206407	-0.00107486	-0.00146839	0.00209218	-0.00818833	0.00079347		0.09	-0.0109932	-0.00060803	-0.00126731	-0.0133246	-0.0014145	-0.0119169	-0.00655555
0.0933333	-0.00354715	-0.00350183	0.00157507	-0.00076375	0.00092303	-0.00968629	-0.00225999		0.0933333	-0.00899008	-0.005729	-0.00320791	-0.0134583	0.00055815	-0.0143288	-0.00658356
0.0966667	-0.0001117	0.00016651	-0.00379025	0.00236464	0.00124456	-0.00912349	0.00142959		0.0966667	-0.00711492	-0.00544102	-0.00279932	-0.0135464	0.00304042	-0.0101468	-0.00938481
0.1	-0.00352788	0.00187096	-0.00310841	0.00131599	0.00216437	-0.0137611	0.00426238		0.1	-0.0003383	-0.012096	0.00175016	-0.0150198	-0.00291975	-0.0176028	-0.0100931
0.103333	0.00012253	-0.00384613	-0.00200672	0.00187912	3.05e-05	-0.0125266	0.00196261		0.103333	-0.00899615	-0.00116885	-0.00428728	-0.0105119	0.00188529	-0.0146821	-0.00511178
0.106667	0.00032835	-0.00367969	0.00081042	-0.00623963	0.00158512	-0.00764143	-0.00324912		0.106667	-0.00361816	-0.00676576	-0.00715342	-0.0149656	-0.00119724	-0.0111059	-0.00463268
0.11	-9.238e-05	0.00104256	-0.00082738	0.00263308	0.00334982	-0.00699392	-0.00261241		0.11	-0.00433877	-0.00856271	-0.00193517	-0.0163565	0.00041379	-0.00991762	-0.00881894
0.113333	-0.00031799	-0.00359735	-0.00299376	0.00118505	-0.00067315	-0.00986845	-0.00194317		0.113333	-0.00673642	-0.0089158	-0.00415682	-0.013382	-0.00112438	-0.0146976	-0.00693381
0.116667	-0.0035022	-0.00070456	-0.00168041	0.00379513	0.00038379	-0.0108819	-0.00141707		0.116667	-0.00860536	-0.00860006	-0.00171308	-0.0114782	0.00039892	-0.0123624	-0.0118107
0.12	0.00104887	-0.00279985	0.0003566	0.00035892	0.00379211	-0.0134022	0.00521559		0.12	-0.00579937	-0.0069734	-0.00242346	-0.00595594	-0.0023214	-0.0127922	-0.0101456
0.123333	-0.00216057	-0.00371724	-0.00099379	0.00195862	-0.00362781	-0.0119591	-0.00032133		0.123333	-0.00468689	-0.00939477	-0.00256379	-0.0157924	-0.00152012	-0.0115498	-0.00718732
0.126667	-0.00261927	0.00126587	0.00050542	0.00049775	0.00210437	-0.0115081	0.00165649		0.126667	-0.00546701	-0.00832717	-0.00664528	-0.0121862	-0.0028279	-0.0142963	-0.00987293
0.13	-0.00095373	-0.00143501	-0.00252448	0.00153466	-0.00174605	-0.0150813	-0.00456913		0.13	-0.00580556	-0.00530101	-0.0012617	-0.0128741	0.00437519	-0.0129482	-0.00641756
0.133333	-0.00262045	-0.00035871	-0.00118125	0.00392149	-0.00790591	-0.00916786	-0.00417788		0.133333	-0.00257404	-0.00857734	-0.00737898	-0.0115989	0.00149995	-0.0131251	-0.0117946
0.136667	-0.00373284	-0.00148494	-0.00186012	-0.00129499	0.00115929	-0.0123229	0.00305169		0.136667	-0.00719699	-0.00729964	0.00084992	-0.015483	-0.00143718	-0.0122457	-0.0122793
0.14	0.00222958	-0.00437325	0.00190277	0.0012974	-0.00120265	-0.0104518	-0.00152476		0.14	-0.00956342	-0.00517558	-0.00449738	-0.0142919	0.00098284	-0.0106503	-0.00684596
0.143333	0.00026239	0.00110373	-0.00235595	0.0001762	-0.00157886	-0.0109627	-0.000136		0.143333	-0.00435155	-0.00579394	-0.00313976	-0.0163148	-0.00189256	-0.0157595	-0.00827187
0.146667	-0.0004717	0.0022511	-0.00582864	0.00652707	-0.00507169	-0.00879485	-0.00063926		0.146667	-0.00851167	-0.00380152	-0.00924564	-0.0157236	0.00636902	-0.0170326	-0.0110925
0.15	-0.00071828	-0.00248175	-0.00028796	0.00123071	-0.0008657	-0.00942382	-0.00395765		0.15	-0.00373658	-0.0127747	-0.00646001	-0.0131801	0.00192212	-0.0142413	-0.0110253
0.153333	-0.00072572	0.00034635	0.00116213	0.00062664	-0.00471751	-0.0150644	-0.00475262		0.153333	-0.00731001	-0.00664706	-0.00866401	-0.0129111	0.00155825	-0.0196525	-0.0116381
0.156667	0.00234436	-0.0029162	-0.00229915	0.0032843	0.00093007	-0.0108671	-0.00288513		0.156667	-0.00633538	-0.00723117	-0.0103036	-0.0160727	-0.00071918	-0.0145848	-0.00984757
0.16	0.0058539	-0.00112849	0.00322434	0.0027188	0.00114366	-0.00957294	0.00422156		0.16	-0.00968264	-0.00701207	-0.00451183	-0.0147425	0.00031094	-0.0126617	-0.0155818
0.163333	-0.00318208	-0.00160993	0.00119267	0.0035262	-0.00313644	-0.010812	-0.0070551		0.163333	-0.00739684	-0.00716951	0.00018713	-0.0131884	0.00269019	-0.0157632	-0.0115479
0.166667	-0.00206639	0.00037742	-0.00329026	-0.00123862	-0.00167356	-0.0117393	0.00135892		0.166667	-0.00402674	-0.00320388	-0.0040236	-0.0151241	-0.00349986	-0.015768	-0.012588
0.17	0.0013263	-0.00105407	-0.00132265	0.00093913	-0.00239912	-0.0143022	0.00040399		0.17	-0.00637961	-0.00963526	-0.00812144	-0.0119604	0.00331535	-0.0161895	-0.00948006
0.173333	1.61e-05	0.00181301	-0.00267237	0.00254449	-0.00294772	-0.0132317	-0.00257855		0.173333	-0.00754569	-0.00537476	-0.00250389	-0.0104385	0.00154701	-0.0136086	-0.00950049
0.176667	-0.00277329	-0.00159042	-0.00334801	0.00194231	-0.00416317	-0.012208	-0.00188185		0.176667	-0.0115081	-0.00660213	-0.00078627	-0.015285	0.00290384	-0.0143437	-0.0143636
0.18	-0.00171419	0.00247903	0.00202395	0.0016188	-0.00065767	-0.0127996	2.945e-05		0.18	-0.00513353	-0.0064739	-0.00677764	-0.0157171	-0.00122115	-0.018128	-0.0146351
0.183333	-0.0008518	0.00061192	-0.00471915	-0.00140006	-0.00524426	-0.0087374	-0.00030434		0.183333	-0.00735994	-0.00233937	-0.00550228	-0.014236	-0.00050124	-0.0106903	-0.0117108
0.186667	-0.00158052	-0.00061409	-0.00328563	0.00226472	-0.0004667	-0.0125559	0.00031663		0.186667	-0.013074	-0.00842313	-0.00816892	-0.0151627	-0.00148762	-0.0184667	-0.0100007
0.19	-0.00157336	-0.00143833	-0.00088365	0.00119679	-0.0060446	-0.00936143	0.00117359		0.19	-0.00414134	-0.00631125	-0.005422	-0.0156674	-0.00201371	-0.0187136	-0.010784
0.193333	-0.00129263	0.00105872	-0.0003265	-0.00182834	-0.00154531	-0.0158096	-0.00108121		0.193333	-0.00917401	-0.00691294	-0.00384282	-0.01742	0.00359631	-0.0162332	-0.0122208
0.196667	0.00025386	-0.00032818	0.00119532	0.00368513	-0.00083845	-0.012909	-0.00222346		0.196667	-0.0082287	-0.0121513	-0.00826277	-0.012856	0.00482984	-0.0172645	-0.0117885
0.2	-0.00220176	-0.00106792	0.00069977	0.00312981	-0.00022948	-0.0137907	-0.00096668		0.2	-0.015228	-0.00925404	-0.00822605	-0.018921	-0.00051559	-0.0134407	-0.0147203
0.203333	0.00245462	0.00035315	-0.00182154	-0.00026166	0.00048706	-0.0159128	-0.00136637		0.203333	-0.0096279	-0.0099174	-0.00699055	-0.0155473	0.00371908	-0.0178498	-0.0189977
0.206667	0.00059926	0.00483201	0.00075607	0.00130294	-0.00159806	-0.0147883	0.00031877		0.206667	-0.00955337	-0.00535577	-0.0068868	-0.0118332	0.00382925	-0.0193102	-0.0107972
0.21	-0.00015353	0.00091428	-0.00052408	0.00073914	-0.00260965	-0.0129976	-0.0041722		0.21	-0.00774753	-0.00531828	-0.00958442	-0.0167344	0.00047569	-0.0157458	-0.0126195
0.213333	0.00077062	0.00032844	-0.00272683	0.00313455	-0.00379609	-0.0164456	-0.00121398		0.213333	-0.00706445	-0.00951223	-0.00617202	-0.0171793	0.00120085	-0.0124907	-0.015614
0.216667	-0.00022172	0.00280446	-0.00184293	0.00323343	-0.00610136	-0.0133452	-0.00019174		0.216667	-0.00806369	-0.00791704	-0.0132294	-0.0168177	-0.00033411	-0.0164645	-0.0139501
0.22	-0.00272629	0.00042784	-0.00172376	0.00118021	-0.00154725	-0.0153693	-0.00276864		0.22	-0.00901519	-0.00907196	-0.00880141	-0.0149552	-0.00016507	-0.0147524	-0.0131716
0.223333	0.00191895	0.00019191	8.44e-06	0.00192662	-0.00346632	-0.0119886	-0.00340867		0.223333	-0.00874218	-0.00968881	-0.00974702	-0.0153102	-3.765e-05	-0.0165014	-0.010848
0.226667	-0.003213	0.00602678	-0.00183078	0.00226284	-0.00173204	-0.0149844	-0.00460094		0.226667	-0.00939169	-0.00358622	-0.012062	-0.0134209	0.00029607	-0.0149286	-0.0138973
0.23	-0.00188023	-0.00123082	-0.00156136	-0.00275837	-0.00463298	-0.0151282	-0.00553479		0.23	-0.00601124	-0.00765962	-0.0099061	-0.0154073	-0.00099688	-0.0192044	-0.0145813
0.233333	-0.00103962	0.0026244	-6.658e-05	0.00636976	-0.00359746	-0.0163383	0.00189896		0.233333	-0.0123869	-0.00602261	-0.00979	-0.0168659	0.00230857	-0.019588	-0.0132518
0.236667	-0.00224187	-0.00163699	-0.00285217	0.00096108	-0.005779	-0.0149139	-0.00181541		0.236667	-0.00521177	-0.011864	-0.00889008	-0.0150233	-0.00079225	-0.0179197	-0.0161515
0.24	0.00215167	0.0039748	-0.00596879	0.00098126	-0.00282301	-0.013284	-0.00337332		0.24	-0.0122121	-0.00669143	-0.0121148	-0.0200888	0.00288856	-0.0180412	-0.0118191
0.243333	0.0021406	-0.00250006	-0.00444122	0.0009967	-0.00150909	-0.0161489	-0.00335838		0.243333	-0.0105521	-0.00962662	-0.00756483	-0.0167696	-0.00126215	-0.0132486	-0.0134465
0.246667	0.00172859	7.43e-05	-0.00014275	0.00312985	-0.00670315	-0.0172844	-0.0026365		0.246667	-0.00900177	-0.0109753	-0.0106312	-0.0144385	-0.00121964	-0.0187763	-0.0138001
0.25	-0.00103495	-0.00381534	-0.00180486	-0.00120022	-0.00510466	-0.0167265	-0.00471748		0.25	-0.00748562	-0.01107	-0.00965847	-0.0116542	0.00204598	-0.0179698	-0.0139171
0.253333	0.00307484	-0.00049546	0.00152099	0.00157178	0.00052158	-0.0154392	-0.0029844		0.253333	-0.0142756	-0.00670045	-0.00924788	-0.0171018	0.0040509	-0.0182173	-0.016688
0.256667	-0.00208318	0.00110963	0.00067869	-0.0013018	-0.00597051	-0.0159127	-0.00444803		0.256667	-0.00884358	-0.00910827	-0.00887206	-0.0138952	-0.00021544	-0.014168	-0.0116686
0.26	-0.00422741	0.00118011	-0.00041093	0.00232263	-0.00272099	-0.0167376	-0.00044349		0.26	-0.0133606	-0.00694159	-0.0132725	-0.0166502	-0.00093006	-0.022428	-0.0155169
0.263333	0.0054142	0.00583993	0.00251002	0.00028485	-0.00536799	-0.0143941	-0.00135799		0.263333	-0.0143164	-0.0118593	-0.0187842	-0.0194204	0.00575493	-0.0182957	-0.0162955
0.266667	-0.00396706	0.00199428	-7.953e-05	0.00566208	-0.00515076	-0.0146858	-0.00239293		0.266667	-0.0111138	-0.00682016	-0.0144184	-0.0170755	0.00449258	-0.0219668	-0.0222274
0.27	0.00065745	0.00365801	-0.00123723	-0.00013175	-0.00554811	-0.0144005	-0.00495931		0.27	-0.0101857	-0.00601437	-0.0121231	-0.0156598	-0.00436858	-0.0183271	-0.015885
0.273333	0.00130103	0.00196597	0.0008538	0.0019743	-0.00557382	-0.0147323	-0.00635311		0.273333	-0.0061253	-0.00732746	-0.012266	-0.017839	-0.00289655	-0.0193116	-0.0160297
0.276667	-0.00058651	-0.00121644	-0.00078932	0.00168041	-0.00342117	-0.0151837	-0.00318712		0.276667	-0.0147492	-0.00243366	-0.0159812	-0.0174466	-0.00088612	-0.0160417	-0.0191454
0.28	-0.00136909	0.00099235	0.00124734	0.00242919	-0.00396768	-0.0207427	-0.00342717		0.28	-0.0114007	-0.010474	-0.0132308	-0.0154899	0.00241534	-0.0194756	-0.0170366
0.283333	-0.00189672	0.00047709	-0.00321379	0.00324028	-0.00719362	-0.015311	-0.00477889		0.283333	-0.0100128	-0.0145452	-0.0145991	-0.0170799	0.00304761	-0.0199066	-0.0119378
0.286667	-0.00182197	0.00246721	0.00233568	0.00262772	-0.00217848	-0.0152452	-0.00076963		0.286667	-0.0113839	-0.0104385	-0.0184543	-0.0165241	-0.00036738	-0.0188471	-0.0185687
0.29	-0.00113776	0.00015419	0.00019082	0.00187502	-0.00233593	-0.0150381	-0.00683605		0.29	-0.0122648	-0.00896058	-0.0123815	-0.0179722	0.00240467	-0.0229637	-0.0175288
0.293333	-0.00556731	0.00124931	-0.00257721	0.00189925	-0.00359184	-0.0118052	-0.00058279		0.293333	-0.012168	-0.01196	-0.0163595	-0.0222195	0.00046907	-0.0190475	-0.0144138
0.296667	-0.00063417	0.00503257	-0.00326941	0.00088372	-0.00394964	-0.0149499	-0.00316917		0.296667	-0.0135055	-0.012981	-0.0125577	-0.0221169	-0.00216936	-0.0197678	-0.0178423
0.3	-0.00421555	0.00218983	-0.00464103	0.00658065	-0.00637354	-0.0166171	-0.00457879		0.3	-0.0115157	-0.00946009	-0.0138464	-0.0176784	-0.0010879	-0.0161729	-0.0156086
0.303333	-0.00156651	0.00342514	0.00252632	0.00224522	-0.00161627	-0.0169738	-0.00400398		0.303333	-0.0127273	-0.0111881	-0.013833	-0.0177748	0.00089826	-0.0150376	-0.0128681
0.306667	0.0010873	-0.00044861	-0.00179948	0.00216237	-0.00392981	-0.0178775	-0.00339455		0.306667	-0.0117607	-0.0138604	-0.0155442	-0.018112	-2.917e-05	-0.0144843	-0.0151476
0.31	-0.00299265	0.00444916	-0.00237911	0.00194091	-0.00159931	-0.0164722	-0.00215171		0.31	-0.0116479	-0.0131978	-0.0103795	-0.0189408	0.00365543	-0.0174864	-0.0174162
0.313333	-0.00355294	0.00192234	-0.00284466	0.00257601	-0.00413733	-0.0146915	-0.00644047		0.313333	-0.0140148	-0.0121619	-0.0155759	-0.0213088	0.00636763	-0.0183693	-0.0157519
0.316667	-0.00264988	0.0061075	0.00322633	0.00075013	-0.00018798	-0.0166243	-0.00539263		0.316667	-0.0123632	-0.00765002	-0.0133099	-0.0166753	0.0074951	-0.017495	-0.0185207
0.32	-0.0031209	0.00136318	0.00277623	0.0031646	-0.00453792	-0.0191108	-0.00755453		0.32	-0.0120079	-0.0110959	-0.0135635	-0.0165228	-0.00206036	-0.0214823	-0.0209166
0.323333	0.00434997	-0.00153368	-0.00052098	0.00233124	-0.0042501	-0.016075	-0.00669607		0.323333	-0.0089063	-0.0101207	-0.017067	-0.0186564	-7.231e-05	-0.0196134	-0.0187025
0.326667	-0.00042049	0.0002121	-2.204e-05	0.00157209	-0.00720667	-0.0211851	-0.00945959		0.326667	-0.00959521	-0.00833572	-0.0127884	-0.0211433	-0.00272456	-0.0163416	-0.0197148
0.33	-0.00145933	0.002417	-0.00046041	0.0035149	-0.0048114	-0.018059	-0.00752812		0.33	-0.0114533	-0.00972486	-0.0147022	-0.0181759	0.00308374	-0.0201189	-0.0190655
0.333333	-0.00086146	0.00202271	0.00101414	-0.00091368	-0.00496643	-0.0261904	-0.00747896		0.333333	-0.00913955	-0.011306	-0.0154825	-0.0166288	0.00382816	-0.023486	-0.0175408
0.336667	-0.00033899	0.00207334	-0.00167853	0.00588836	0.00067538	-0.0179548	-0.00259635		0.336667	-0.00883107	-0.0105886	-0.0120661	-0.0216521	0.00020882	-0.0193729	-0.0219015
0.34	-0.00042895	0.00156103	-0.00140409	0.00422231	-0.00191273	-0.018017	-0.00343236		0.34	-0.00982648	-0.0108045	-0.0147334	-0.0226054	0.00148004	-0.0230859	-0.0164563
0.343333	-0.00040571	0.00204395	-0.00311081	0.00222478	-0.00402908	-0.0178659	-0.00654388		0.343333	-0.0153191	-0.0088944	-0.0169429	-0.0168868	0.00092267	-0.0224804	-0.0194858
0.346667	-0.00069339	0.00374107	-0.00051221	0.00350984	-0.00112394	-0.0185361	-0.00685241		0.346667	-0.0222203	-0.0139222	-0.0159976	-0.0208897	-0.00149969	-0.0180485	-0.0198343
0.35	0.0022195	-0.00210876	-0.00088668	0.00017328	-0.00098073	-0.0201387	-0.00218876		0.35	-0.0104505	-0.00963872	-0.0174612	-0.0175182	0.00517412	-0.0140342	-0.015457
0.353333	0.00092597	0.00125185	-0.00391253	0.00207363	-0.00383647	-0.0214618	-0.00549859		0.353333	-0.0103494	-0.0156486	-0.0134479	-0.0208969	-0.00053471	-0.0254775	-0.0185643
0.356667	-0.00217042	0.00292301	0.0009457	0.00156853	-0.00426102	-0.02157	-0.00321148		0.356667	-0.0142672	-0.012621	-0.0157241	-0.0204249	0.00362432	-0.0241696	-0.0186473
0.36	-0.00103212	0.00432669	0.00134481	0.00215978	0.00363814	-0.0210813	-0.00563674		0.36	-0.0139735	-0.00980636	-0.0193005	-0.0231125	-0.00264875	-0.0186039	-0.017026
0.363333	-0.00010307	0.00177411	-0.0048758	0.0046512	-0.00387435	-0.0170984	-0.00687242		0.363333	-0.0119235	-0.0140338	-0.0207798	-0.0263167	-0.00139792	-0.0192304	-0.0225135
0.366667	-0.00130949	0.00172924	-0.0031263	0.00227895	-0.00551677	-0.0186039	-0.00500188		0.366667	-0.0164386	-0.00778164	-0.0185287	-0.0197388	-0.0022785	-0.0202788	-0.020472
0.37	-0.00143574	0.00373495	0.00142258	0.00086706	-0.0033395	-0.0215615	-0.0013496		0.37	-0.0156364	-0.0127698	-0.0222029	-0.0242274	0.00395825	-0.0210737	-0.0188261
0.373333	0.00074779	-0.00107474	0.00400617	0.00077143	-0.00314547	-0.0190728	-0.00915768		0.373333	-0.0131924	-0.0137319	-0.0185351	-0.0190453	-0.0010329	-0.0215356	-0.0200454
0.376667	0.00117553	0.00057037	0.0011873	0.00257988	-0.00262309	-0.0198773	-0.00790499		0.376667	-0.0153202	-0.0124003	-0.0181294	-0.0220834	-0.00336792	-0.017649	-0.0173278
0.38	-0.00190566	0.00332756	-0.00022511	0.00231839	-0.00103012	-0.0195914	-0.00549297		0.38	-0.0096385	-0.0117251	-0.0179336	-0.0240268	0.00360802	-0.0173047	-0.0184513
0.383333	-0.00086375	0.00585454	-0.00194519	0.00324337	0.00015142	-0.0201513	-0.00244544		0.383333	-0.0127422	-0.0110274	-0.015665	-0.0195159	-0.00070267	-0.0235989	-0.0219316
0.386667	-0.00653012	-0.00085017	-0.00082763	-0.00015193	-0.00195078	-0.0189705	-0.00146693		0.386667	-0.0122836	-0.0125515	-0.0194188	-0.0230782	-0.00126662	-0.0219503	-0.0212234
0.39	-0.00220221	0.00355707	-0.00088468	0.00112091	-0.00037277	-0.0188641	-0.00303601		0.39	-0.0132861	-0.0149281	-0.0199679	-0.0217321	0.0007463	-0.0168997	-0.0246924
0.393333	0.00332504	0.00316589	-0.00201197	0.00101754	-0.00083896	-0.0147645	-0.00302948		0.393333	-0.0140305	-0.0142797	-0.021207	-0.0190859	0.00151905	-0.0210136	-0.0222001
0.396667	0.0015456	6.962e-05	-0.00442648	0.0007202	-0.00250111	-0.0206327	-0.00869249		0.396667	-0.0107393	-0.0119177	-0.0234226	-0.0231732	0.00586849	-0.0269273	-0.0166959
0.4	3.349e-05	0.00196007	-0.00221964	0.0023103	-0.00155884	-0.0184725	-0.00278874		0.4	-0.0146149	-0.0152295	-0.0169948	-0.0239117	0.0019759	-0.0210899	-0.0198056
0.403333	0.00174686	0.00334564	-0.0038387	0.00340699	-0.00182783	-0.0203327	-0.00843898		0.403333	-0.0129608	-0.00943825	-0.0180044	-0.0169794	0.00355668	-0.0267095	-0.019472
0.406667	-0.00146423	0.00016722	-0.00027063	0.00120421	-0.00086534	-0.017571	-0.00634543		0.406667	-0.0107381	-0.00917169	-0.0201984	-0.0190706	0.00135199	-0.0222565	-0.0232267
0.41	-0.0039296	-0.00088899	0.00087426	0.00273574	-0.003494	-0.0208675	-0.00563375		0.41	-0.0174772	-0.0151798	-0.0217282	-0.0182637	-0.00076883	-0.0244045	-0.0206418
0.413333	0.0005885	0.00116918	0.00109442	0.00279009	-0.00304992	-0.0195255	-0.00572702		0.413333	-0.014663	-0.00900675	-0.0164972	-0.0233048	0.00027192	-0.0204881	-0.0220925
0.416667	-0.00110275	0.00561845	-0.00101257	0.00159801	-0.00372763	-0.021892	-0.00957978		0.416667	-0.0121945	-0.0136312	-0.0162602	-0.0200553	-0.0040367	-0.0246919	-0.0236529
0.42	-0.00222378	0.00645471	-0.00140366	0.00400698	7.141e-05	-0.02018	-0.00745083		0.42	-0.0151053	-0.0138934	-0.0187593	-0.0202129	0.00062036	-0.0225729	-0.0248046
0.423333	7.299e-05	-0.00039505	-0.00260663	0.00417699	-0.00345085	-0.0227643	-0.00491347		0.423333	-0.015573	-0.0123012	-0.0168971	-0.0211774	0.00230437	-0.0241789	-0.0252251
0.426667	-0.0041432	0.0039923	-0.00032787	0.00233306	0.00079989	-0.0201109	-0.00540957		0.426667	-0.0163305	-0.00903827	-0.0204771	-0.021475	0.00130542	-0.023949	-0.0221951
0.43	-0.00260078	0.00194627	-0.00134105	0.00293346	-0.00114032	-0.0254293	-0.00574889		0.43	-0.014772	-0.0157525	-0.0220307	-0.0234053	-0.00057432	-0.0190532	-0.0196888
0.433333	-0.00238282	0.00657174	0.00017155	0.00051477	-0.00270333	-0.0209576	-0.00536802		0.433333	-0.0193653	-0.0149935	-0.0164422	-0.0207335	0.00191951	-0.0245618	-0.0246905
0.436667	0.00045471	0.00360083	-0.00305036	0.0033882	9.72e-05	-0.0241433	-0.00715502		0.436667	-0.0139111	-0.0185492	-0.0214708	-0.0242156	3.373e-05	-0.0201836	-0.0254608
0.44	-0.0010521	0.00287848	0.00123344	0.00081132	-0.00083677	-0.0171837	-0.00940439		0.44	-0.0170119	-0.0141365	-0.0216035	-0.0211925	0.00301698	-0.0225935	-0.0207754
0.443333	-0.00078847	0.00345264	0.00063145	0.00265896	-0.00287929	-0.0220247	-0.00715924		0.443333	-0.0157257	-0.0149349	-0.0219484	-0.0210691	0.00253021	-0.0227791	-0.0231707
0.446667	0.0024394	0.00247461	-0.00485147	0.00498667	0.00022719	-0.0223843	-0.00981416		0.446667	-0.016708	-0.0172526	-0.021408	-0.0259585	0.00106409	-0.0223193	-0.0235966
0.45	-0.00050474	0.00221419	-0.00053442	0.0062636	-0.00412005	-0.0232457	-0.0114004		0.45	-0.0173326	-0.011112	-0.0217757	-0.0269735	-0.0013814	-0.0216955	-0.0232336
0.453333	0.00239856	0.00137763	-0.00340855	0.00562327	-0.00607048	-0.019939	-0.0033404		0.453333	-0.0218009	-0.0179051	-0.0201539	-0.0226174	0.00363911	-0.0222667	-0.0206178
0.456667	0.00047628	0.00570288	-0.00157329	0.00146709	-0.00651616	-0.0243943	-0.0115076		0.456667	-0.0207269	-0.0157661	-0.0202319	-0.0209911	-0.00128055	-0.0245974	-0.0257429
0.46	-0.00024117	-8.428e-05	0.0007763	0.00157886	-0.00699361	-0.0249194	-0.00784616		0.46	-0.0127488	-0.0149429	-0.0214286	-0.0240289	-0.00053878	-0.0227542	-0.0252662
0.463333	-0.00171365	0.00824702	-0.00242153	0.00652405	-0.00381613	-0.0245241	-0.00774938		0.463333	-0.0174002	-0.0138153	-0.0246101	-0.0241217	6.552e-05	-0.020889	-0.0203357
0.466667	-0.00156685	0.003438	0.00400889	0.00289084	-0.0069629	-0.0189339	-0.00857934		0.466667	-0.0185854	-0.0117412	-0.0194211	-0.0227611	0.00109947	-0.023159	-0.0262069
0.47	-0.00168638	0.00622242	-0.00381915	0.00101403	-0.00308504	-0.0222328	-0.00806858		0.47	-0.0177042	-0.0128472	-0.0265236	-0.0215702	0.00313111	-0.0190105	-0.0221226
0.473333	-0.00285685	0.00382295	-0.00329678	0.00454724	-0.00348872	-0.0242597	-0.00731509		0.473333	-0.0158798	-0.0137926	-0.0235828	-0.0283344	-0.00187113	-0.0259639	-0.0226708
0.476667	-0.00203518	0.0016695	0.00128602	0.00519545	-0.00174451	-0.0167788	-0.0111227		0.476667	-0.0188178	-0.0145898	-0.0217332	-0.0241421	0.00092382	-0.0232166	-0.0255976
0.48	-0.00113026	0.00261847	7.476e-05	0.0085457	0.00176812	-0.0244774	-0.00283283		0.48	-0.0185384	-0.0154464	-0.0242555	-0.0255965	0.00163867	-0.0250721	-0.0245713
0.483333	-0.00206399	0.00776433	0.00045464	0.00106305	-0.00602763	-0.0197068	-0.00696496		0.483333	-0.0186182	-0.0129878	-0.0252017	-0.0279634	0.00126463	-0.0209988	-0.0217625
0.486667	0.00079215	-0.00055141	-0.0019542	0.0016546	-0.00132078	-0.0252253	-0.00872406		0.486667	-0.01415	-0.0164986	-0.0228027	-0.0234959	-0.00118381	-0.0260051	-0.0281571
0.49	0.00114012	0.0036929	-0.0011053	-0.00068712	-0.0030505	-0.0280439	-0.0137331		0.49	-0.0181472	-0.0173796	-0.0215821	-0.024277	0.00873876	-0.0239335	-0.0209044
0.493333	2.012e-05	0.00441735	-0.00273363	0.00232172	-0.00062139	-0.0226437	-0.00765406		0.493333	-0.0229655	-0.0134632	-0.0249858	-0.0218669	0.00398779	-0.0244459	-0.0237237
0.496667	-0.0007259	0.0045104	0.00209544	0.00334059	-0.00173324	-0.0240558	-0.00380024		0.496667	-0.016723	-0.0191712	-0.0242772	-0.0261041	-0.00107838	-0.0247012	-0.0246129
0.5	0.0145897	0.0343731	0.039307	0.0515089	-0.00230838	-0.0322525	-0.0168597		0.5	-0.0205485	-0.0146583	-0.0227874	-0.0264692	0.00293689	-0.0263914	-0.0213613
0.503333	0.0277001	0.0434762	0.039931	0.0530077	0.00166157	-0.0317058	-0.0165302		0.503333	-0.0197286	-0.0146684	-0.0256074	-0.0260665	0.00266864	-0.028115	-0.0303155
0.506667	0.0357619	0.0578024	0.0417352	0.0599995	-0.00400905	-0.0326506	-0.018292		0.506667	-0.0175037	-0.0200686	-0.0175237	-0.0194994	0.00151509	-0.0248055	-0.0322573
0.51	0.0452998	0.0695727	0.0499388	0.0633746	-0.00026803	-0.0284701	-0.0160716		0.51	-0.0170151	-0.0188051	-0.0226021	-0.0283087	-0.00037332	-0.0329429	-0.032037
0.513333	0.0491199	0.069553	0.0479143	0.0594712	-1.3e-06	-0.0281908	-0.0132546		0.513333	-0.0185307	-0.0191805	-0.027075	-0.0284249	0.00225821	-0.030643	-0.0285566
0.516667	0.0614207	0.0802545	0.0571055	0.0649267	0.00331928	-0.02589	-0.0126802		0.516667	-0.0169954	-0.0169377	-0.0240837	-0.0257748	0.00219915	-0.0336531	-0.032237
0.52	0.0659111	0.081717	0.0517365	0.0612468	-0.00081509	-0.0275097	-0.0175505		0.52	-0.0154973	-0.0188489	-0.0267767	-0.0233675	0.00582824	-0.0313766	-0.0324603
0.523333	0.0720385	0.0908527	0.0480032	0.0638661	-0.00184563	-0.0273054	-0.0139937		0.523333	-0.0185024	-0.0152812	-0.0239756	-0.025747	0.00385809	-0.0311285	-0.0270973
0.526667	0.0702322	0.0898266	0.0540136	0.0666738	-0.00166334	-0.0278767	-0.0161741		0.526667	-0.0201593	-0.0196212	-0.0246014	-0.0283628	0.00398318	-0.0271225	-0.0247107
0.53	0.0754237	0.0927523	0.0524575	0.0666034	-0.00239933	-0.0230018	-0.011765		0.53	-0.019619	-0.0179306	-0.0250317	-0.0249497	0.00204727	-0.0294374	-0.0297509
0.533333	0.0771685	0.097667	0.0541394	0.063008	0.0017876	-0.0263191	-0.00823511		0.533333	-0.0174202	-0.0177064	-0.0297274	-0.0291269	-0.00184968	-0.0269469	-0.0278146
0.536667	0.078316	0.101422	0.0519841	0.0682654	0.00203261	-0.0234911	-0.0120335		0.536667	-0.0169572	-0.019694	-0.0272434	-0.0264654	0.0025779	-0.0266915	-0.0237466
0.54	0.0823562	0.105784	0.0508642	0.0642684	0.00038215	-0.018748	-0.0153001		0.54	-0.018544	-0.0135224	-0.0232696	-0.0274371	0.00243967	-0.026142	-0.0252108
0.543333	0.085232	0.10394	0.0520754	0.0687575	0.00075152	-0.0199925	-0.0135581		0.543333	-0.0184769	-0.0160698	-0.0263047	-0.0269515	0.00390437	-0.0214918	-0.0235795
0.546667	0.0877582	0.110935	0.0477739	0.0684186	-0.00172709	-0.0232019	-0.0082364		0.546667	-0.0212145	-0.0210896	-0.0319282	-0.0295011	0.00118587	-0.025457	-0.0231205
0.55	0.0893669	0.110059	0.0529673	0.0664068	8.897e-05	-0.0202992	-0.0040959		0.55	-0.0183571	-0.0146884	-0.030607	-0.0274884	0.00529807	-0.0247286	-0.0256469
0.553333	0.0966178	0.114784	0.0527923	0.0645766	2.345e-05	-0.0223479	-0.0126686		0.553333	-0.0149438	-0.0195306	-0.0275599	-0.0244753	-0.00084172	-0.0252652	-0.0259969
0.556667	0.0912435	0.114182	0.052934	0.0709876	0.00320084	-0.0228595	-0.00762467		0.556667	-0.01784	-0.0207689	-0.0263383	-0.0276128	0.00231726	-0.0238944	-0.0228825
0.56	0.0904769	0.115499	0.0545106	0.0662519	0.00059817	-0.0180437	-0.00725136		0.56	-0.0185411	-0.0202939	-0.0237949	-0.0270297	0.00351452	-0.0226622	-0.0223078
0.563333	0.0983199	0.118526	0.0533552	0.0654675	0.00181737	-0.0224305	-0.00613043		0.563333	-0.0202228	-0.0153465	-0.0243218	-0.0268752	0.00237493	-0.0161388	-0.017926
0.566667	0.0968014	0.119222	0.0542392	0.0675238	0.00134677	-0.0177402	-0.00283877		0.566667	-0.0190934	-0.0160069	-0.0292591	-0.0279056	0.00252234	-0.0190793	-0.0164452
0.57	0.0961579	0.119441	0.0548569	0.0700982	0.00146992	-0.016429	-0.00398705		0.57	-0.0249974	-0.0147881	-0.0272541	-0.0210659	0.00082732	-0.0191118	-0.0216235
0.573333	0.0958022	0.126188	0.0540926	0.0661499	0.00248889	-0.0191388	-0.00567096		0.573333	-0.0176488	-0.0185594	-0.0253057	-0.029159	0.0044931	-0.0238884	-0.0218267
0.576667	0.100619	0.122591	0.0593339	0.0631087	0.00042067	-0.0171227	-0.00651687		0.576667	-0.0182441	-0.0227387	-0.0311858	-0.0258223	0.00177357	-0.0210831	-0.0220269
0.58	0.100163	0.127373	0.053035	0.0657061	0.0015175	-0.0151607	-0.00337763		0.58	-0.025021	-0.0156986	-0.0264709	-0.0296308	5.74e-05	-0.0121539	-0.0162273
0.583333	0.0975868	0.126139	0.0534537	0.0649928	6.813e-05	-0.0171467	-0.00742945		0.583333	-0.0161849	-0.0171872	-0.0262756	-0.0249715	-0.00070792	-0.0181267	-0.0152324
0.586667	0.103861	0.129696	0.0515107	0.0675657	0.00286586	-0.0134138	-0.00049815		0.586667	-0.021857	-0.0201109	-0.0297944	-0.0269754	0.00323093	-0.01854	-0.0200737
0.59	0.105465	0.132324	0.0538898	0.0693548	0.00590491	-0.0148818	-0.00329874		0.59	-0.0216075	-0.0208729	-0.0302693	-0.028757	-0.00316795	-0.0121819	-0.0180672
0.593333	0.105547	0.129337	0.0536908	0.0698476	-9.917e-05	-0.0119008	-0.00621019		0.593333	-0.0190778	-0.0172513	-0.0287285	-0.0295262	0.0024563	-0.0177434	-0.0127246
0.596667	0.106283	0.130022	0.0545376	0.0677194	-0.00359167	-0.0156417	0.00122168		0.596667	-0.0221912	-0.0189877	-0.0309626	-0.024453	-0.00151242	-0.0152721	-0.0152097
0.6	0.107808	0.135195	0.0555288	0.0716589	0.00194442	-0.014119	0.00317637		0.6	-0.0251041	-0.0219804	-0.0296656	-0.0267636	-0.00012639	-0.0135453	-0.0168434
0.603333	0.108275	0.133908	0.055309	0.0703775	-0.00071888	-0.0109942	-0.00089501		0.603333	-0.0226095	-0.0171106	-0.0278164	-0.0284334	0.00402505	-0.0155071	-0.014837
0.606667	0.107146	0.136904	0.0527057	0.0675881	-0.00095144	-0.00932689	-0.00032305		0.606667	-0.0198225	-0.0193773	-0.0233669	-0.0312009	0.00218334	-0.0130934	-0.0162872
0.61	0.109699	0.13744	0.0553007	0.0665628	0.00015525	-0.0102992	0.00177863		0.61	-0.0193332	-0.0189909	-0.0303484	-0.0265996	0.00142823	-0.016248	-0.0120218
0.613333	0.107382	0.137829	0.0557673	0.0671419	0.00187341	-0.00881413	0.00104195		0.613333	-0.022194	-0.0202997	-0.0288106	-0.0280774	0.00111687	-0.0151856	-0.0158269
0.616667	0.113699	0.140788	0.0533763	0.0638715	0.00394109	-0.0071449	0.00472552		0.616667	-0.0208534	-0.0180842	-0.0341809	-0.0259812	-0.00163907	-0.0135523	-0.0173189
0.62	0.111831	0.139959	0.0512339	0.0697886	0.00034437	-0.0134362	-0.00109961		0.62	-0.0211988	-0.0174987	-0.0308303	-0.0267268	-0.00124512	-0.015469	-0.0113225
0.623333	0.112526	0.143443	0.0556085	0.0647557	-0.00080993	-0.00688061	0.002425		0.623333	-0.0185215	-0.0154543	-0.0276201	-0.0277006	-5.533e-05	-0.0140444	-0.0120516
0.626667	0.11604	0.145199	0.0538389	0.0645422	0.00041977	-0.00509561	0.00860327		0.626667	-0.0204211	-0.0226011	-0.0273609	-0.0249763	0.00051016	-0.0159999	-0.00833218
0.63	0.114148	0.144641	0.0570851	0.0701923	0.00103785	-0.0063317	0.00422316		0.63	-0.0228271	-0.0146679	-0.0276237	-0.0273073	0.00323408	-0.00897504	-0.0114422
0.633333	0.113851	0.143273	0.0520422	0.0703071	0.00287606	-0.00574664	0.00438705		0.633333	-0.021489	-0.0166736	-0.0297791	-0.0302476	0.00010151	-0.0128126	-0.010449
0.636667	0.115171	0.145702	0.0544398	0.0680459	0.00479325	-0.00720245	0.00317401		0.636667	-0.0251184	-0.0204936	-0.0281197	-0.0289577	0.00648262	-0.00985848	-0.0119943
0.64	0.115498	0.144954	0.0532973	0.0657229	0.00328975	-0.00530014	0.0040022		0.64	-0.0204794	-0.0206218	-0.0273523	-0.027622	0.00534467	-0.0125127	-0.00934903
0.643333	0.113624	0.149981	0.0590286	0.0690429	0.00107242	-0.00355585	0.00446815		0.643333	-0.0196342	-0.0208047	-0.0223827	-0.0279524	-0.00087723	-0.00964703	-0.0113397
0.646667	0.122022	0.146893	0.0563836	0.0712672	-0.00011877	-0.00067165	0.00718049		0.646667	-0.0205285	-0.0250042	-0.0288324	-0.0311493	0.00290251	-0.0120659	-0.00868737
0.65	0.119716	0.149131	0.0554332	0.0724342	-0.00201494	-0.0068364	0.0103245		0.65	-0.026077	-0.0206241	-0.0323147	-0.0342623	0.00021885	-0.0112854	-0.0128859
0.653333	0.12076	0.150833	0.0557951	0.0691404	-0.00046975	-0.00456206	0.00843023		0.653333	-0.0213205	-0.0188838	-0.0319863	-0.0343874	0.00297395	-0.0128904	-0.00974625
0.656667	0.119754	0.150589	0.0567765	0.0734861	-0.00023252	-0.00309188	0.00625173		0.656667	-0.0250919	-0.0172741	-0.0332923	-0.0290872	0.00053172	-0.00681388	-0.00530525
0.66	0.120138	0.151604	0.0512275	0.0676947	-0.00166888	-0.00124472	0.00806371		0.66	-0.0227703	-0.0186691	-0.0342254	-0.0297283	0.00249416	-0.0108571	-0.00716995
0.663333	0.123187	0.148619	0.0579689	0.0710201	-0.00337952	-0.00225519	0.0087132		0.663333	-0.0257511	-0.0180383	-0.0329886	-0.0303934	0.00145908	-0.0106223	-0.00515174
0.666667	0.122042	0.152547	0.053948	0.0700093	-0.00181935	-0.00033868	0.00647663		0.666667	-0.0246052	-0.0155193	-0.0301751	-0.0348569	-0.00115131	-0.0116011	-0.00572914
0.67	0.125469	0.15303	0.0571502	0.0697068	-0.00117481	0.00063459	0.0123092		0.67	-0.0219529	-0.0234242	-0.0326724	-0.032512	-0.00028104	-0.00897177	-0.0093601
0.673333	0.125871	0.159581	0.0590826	0.0671008	-0.00209512	0.00106707	0.0102736		0.673333	-0.0273294	-0.0167043	-0.0337881	-0.0288552	-0.00282477	-0.0115914	-0.00881931
0.676667	0.120954	0.15599	0.0576447	0.0671373	0.00062259	0.00403114	0.0119577		0.676667	-0.0192399	-0.0178599	-0.0336684	-0.0285644	-0.00058631	-0.00631216	-0.00362651
0.68	0.12195	0.154526	0.055201	0.0703386	0.00098535	0.00161048	0.00971731		0.68	-0.021914	-0.0168121	-0.0315104	-0.030412	-0.00181716	-0.00822551	-0.00407836
0.683333	0.118387	0.156918	0.0519981	0.0664616	0.00274691	0.00186557	0.0155176		0.683333	-0.0213259	-0.0210251	-0.0345595	-0.0317717	-0.00247415	-0.00593802	-0.00433031
0.686667	0.124344	0.154256	0.0534417	0.0676678	-0.00191913	0.00142356	0.0140347		0.686667	-0.0237235	-0.0209407	-0.0332933	-0.028616	0.00221939	-0.00791985	-0.00673588
0.69	0.126589	0.154526	0.0565158	0.0715072	0.00108224	0.00295493	0.0140663		0.69	-0.0249396	-0.0209766	-0.0287321	-0.0305849	-0.00044108	-0.00482875	-0.00877803
0.693333	0.124914	0.155469	0.0549186	0.0711097	0.00187756	0.00019794	0.0173157		0.693333	-0.0225779	-0.0211962	-0.0317512	-0.0279774	-0.00094864	-0.0109239	-0.00060281
0.696667	0.127942	0.153624	0.057367	0.070653	-0.00300748	0.00258055	0.0175404		0.696667	-0.0255564	-0.0265935	-0.0320485	-0.0324976	0.00380228	-0.00454862	-0.00102565
0.7	0.128317	0.158002	0.0573698	0.0670133	0.00126639	2.615e-05	0.0122805		0.7	-0.0222149	-0.0157786	-0.0353571	-0.0324844	0.00038813	-0.00575584	-0.00485359
0.703333	0.126494	0.161664	0.0536318	0.0749382	0.00209673	0.00152569	0.0154178		0.703333	-0.0249777	-0.0217114	-0.0347554	-0.029418	0.00889385	-0.00270572	-0.00764877
0.706667	0.125728	0.159033	0.0566901	0.070492	0.00182652	-0.00055141	0.0149273		0.706667	-0.0209699	-0.0234859	-0.0347397	-0.0307471	0.00060762	-0.0049845	-0.00323043
0.71	0.130333	0.160623	0.0549507	0.065669	0.00361837	0.0010039	0.0162752		0.71	-0.0235163	-0.0190807	-0.0333034	-0.0315246	-0.00113849	-0.00498212	0.00139003
0.713333	0.128648	0.157446	0.0548047	0.0705869	0.00230232	0.00262922	0.014558		0.713333	-0.0243276	-0.0232163	-0.032402	-0.0273035	0.00603262	-0.0037819	-0.00294804
0.716667	0.129296	0.162199	0.0536428	0.0682076	0.00175597	0.00282791	0.0137527		0.716667	-0.0259427	-0.0145547	-0.035549	-0.0326026	0.00244484	5.002e-05	-0.00707891
0.72	0.132312	0.162162	0.0564549	0.0700478	0.00384032	0.00110366	0.0145229		0.72	-0.0220673	-0.0214908	-0.0346273	-0.0292239	0.00096836	-0.00093092	-0.0034389
0.723333	0.133544	0.162675	0.0521734	0.0666489	0.00054782	0.00495059	0.0152982		0.723333	-0.0200736	-0.0210992	-0.0332754	-0.033746	3.467e-05	-0.0007034	-0.003465
0.726667	0.12935	0.162143	0.0553265	0.0727371	-0.00180386	0.00556499	0.0170711		0.726667	-0.0227086	-0.0202275	-0.0355002	-0.0340708	-0.00106248	-0.00922245	-0.0034722
0.73	0.131279	0.165231	0.05449	0.0673636	-3.457e-05	0.00393406	0.0135273		0.73	-0.0260113	-0.0199981	-0.0336168	-0.03498	0.002355	-0.00631527	-0.00442651
0.733333	0.131805	0.164418	0.0563003	0.0681257	-0.00127683	0.00751859	0.0185303		0.733333	-0.0263319	-0.0195884	-0.0375696	-0.0330007	0.00357238	-0.00047695	0.0027621
0.736667	0.132293	0.164702	0.0537384	0.0713527	-0.00423776	0.00960146	0.0211984		0.736667	-0.0244781	-0.019545	-0.033696	-0.0341357	0.00136559	7.314e-05	-0.00027755
0.74	0.130275	0.162826	0.0559499	0.0704616	0.00105612	0.00816928	0.0216208		0.74	-0.0230095	-0.0288637	-0.0329713	-0.036022	0.00089144	-0.00226129	-0.00152783
0.743333	0.12942	0.168068	0.0541722	0.0677301	0.00528073	0.00599694	0.0174908		0.743333	-0.0265488	-0.0248901	-0.0304015	-0.0335761	0.00309408	0.00157597	0.00359228
0.746667	0.133492	0.171292	0.0552139	0.0669433	0.00079201	0.00571306	0.020449		0.746667	-0.026731	-0.0196379	-0.0407749	-0.0349806	0.00117123	-0.00071498	0.0081162
0.75	0.133432	0.166616	0.0514534	0.0701859	-0.00054283	0.00550833	0.017673		0.75	-0.0252696	-0.0203233	-0.0317112	-0.0326492	0.00255379	0.00267318	9.355e-05
0.753333	0.134188	0.16666	0.0544047	0.0691761	0.00046107	0.00858946	0.0177451		0.753333	-0.0288743	-0.0236416	-0.0331889	-0.0316597	0.00316817	-0.00267006	0.00089399
0.756667	0.132021	0.166473	0.0504475	0.0679262	0.00356601	0.00842367	0.0184807		0.756667	-0.0260937	-0.0219417	-0.035713	-0.0326152	0.00245632	-0.00355515	-0.00122283
0.76	0.134556	0.167879	0.0552958	0.0684012	0.0036593	0.00919379	0.0203846		0.76	-0.0260598	-0.023672	-0.033755	-0.0374991	0.00041537	-7.993e-05	0.00247714
0.763333	0.13133	0.168371	0.0561152	0.0669448	-0.00224326	0.0110041	0.0204234		0.763333	-0.0226636	-0.0227887	-0.038251	-0.0333654	-0.00049105	0.00137937	0.00326635
0.766667	0.136494	0.168698	0.0557493	0.0699424	0.00149432	0.012776	0.0204663		0.766667	-0.0277006	-0.0232506	-0.0407585	-0.0300603	0.00072759	-0.00331979	0.00285085
0.77	0.137124	0.170365	0.0528935	0.0701064	-0.00243952	0.00907844	0.022756		0.77	-0.0234118	-0.0198542	-0.0389217	-0.0321	-0.00099519	0.00149528	0.00296956
0.773333	0.136126	0.171752	0.0574296	0.0719352	-0.00176267	0.00821104	0.018879		0.773333	-0.0235845	-0.019728	-0.034626	-0.0361767	-0.00344328	-0.00019487	0.00157394
0.776667	0.139813	0.169311	0.0571828	0.0698585	0.00184165	0.0136771	0.0231764		0.776667	-0.0214578	-0.0253839	-0.0365293	-0.0360755	0.00080932	0.00279871	0.00547765
0.78	0.136824	0.1716	0.0601459	0.0689392	0.00179296	0.0113037	0.0219275		0.78	-0.0214385	-0.0209961	-0.0392584	-0.0347113	-0.00203488	0.00433101	0.00219401
0.783333	0.136402	0.172801	0.0522415	0.0739441	-0.00095052	0.0115528	0.0213991		0.783333	-0.0308703	-0.0235281	-0.0383236	-0.0373026	0.00251252	0.00293745	0.00187918
0.786667	0.135237	0.176401	0.0530581	0.0708424	0.00226927	0.0108602	0.02188		0.786667	-0.0292561	-0.020982	-0.0401078	-0.0308529	0.0041978	-0.00078152	0.00234961
0.79	0.142511	0.172278	0.0556109	0.0711273	0.00043082	0.0119084	0.0209809		0.79	-0.0264052	-0.021918	-0.034863	-0.0351881	0.00245052	-0.00199091	0.00052516
0.793333	0.140077	0.173194	0.0596916	0.0688637	-0.00156629	0.0107885	0.0267087		0.793333	-0.0293409	-0.0244911	-0.0383519	-0.0394293	0.00218342	-0.00194826	0.00149702
0.796667	0.137448	0.172691	0.0546819	0.0691002	-0.00089645	0.0137851	0.0260587		0.796667	-0.0224638	-0.0232508	-0.0398147	-0.0398759	-5.2e-07	0.00449829	0.00135112
0.8	0.138306	0.1759	0.0510778	0.0681764	0.00107166	0.0143898	0.0260288		0.8	-0.0238824	-0.0264891	-0.0377308	-0.034252	-0.00070387	0.00317303	9.137e-05
0.803333	0.143049	0.174256	0.0507451	0.0681827	0.00230947	0.0131178	0.0256984		0.803333	-0.0254201	-0.0212035	-0.0417549	-0.0362758	-0.00370187	0.00093591	0.00240435
0.806667	0.144827	0.170111	0.0578383	0.071229	0.0002729	0.0144709	0.0258056		0.806667	-0.0276238	-0.0227092	-0.0385628	-0.029628	8.574e-05	0.00566141	0.00763916
0.81	0.137408	0.174337	0.055792	0.066493	0.00072516	0.0147434	0.0312362		0.81	-0.0295294	-0.0219343	-0.0388425	-0.0344643	0.00064932	0.00458371	0.00570452
0.813333	0.140527	0.175893	0.0569764	0.070614	-0.00011129	0.0143202	0.0246256		0.813333	-0.0277542	-0.025632	-0.0340856	-0.0338289	0.00253754	0.00316892	0.0066471
0.816667	0.142546	0.174129	0.0536871	0.0721142	-0.00118479	0.0157714	0.0245159		0.816667	-0.0219685	-0.0211447	-0.0391124	-0.0351745	0.00093675	0.0041323	0.00272389
0.82	0.145205	0.175784	0.0544681	0.0715397	0.00338689	0.0176799	0.0269129		0.82	-0.0264097	-0.0232611	-0.0362784	-0.0336508	0.00364573	0.00369576	0.00685639
0.823333	0.140625	0.178474	0.0580874	0.0711734	0.00060935	0.0168529	0.0289823		0.823333	-0.0252216	-0.0187407	-0.0358786	-0.0360808	0.00559993	0.00382506	0.00419801
0.826667	0.139048	0.176067	0.0516295	0.0684634	-0.00189145	0.0175622	0.0226214		0.826667	-0.0240819	-0.0196181	-0.0375114	-0.0334796	-0.00079127	0.00314728	0.00651541
0.83	0.142948	0.174198	0.0597963	0.0687273	-0.00037505	0.0188596	0.0249367		0.83	-0.0255624	-0.0282545	-0.039612	-0.0333735	0.00173139	0.00783248	0.00885182
0.833333	0.143392	0.17791	0.0503025	0.070919	-0.00084771	0.0189898	0.026708		0.833333	-0.0235787	-0.0256156	-0.0428101	-0.0353892	0.00106622	0.00611956	0.00740038
0.836667	0.142257	0.173198	0.0580815	0.0676847	-0.0002954	0.0196271	0.0285696		0.836667	-0.0281103	-0.0293305	-0.0378713	-0.0352884	0.00051364	0.0031501	0.0101457
0.84	0.144421	0.180015	0.0571921	0.0668025	-0.00342016	0.0199903	0.0335865		0.84	-0.0325664	-0.0212564	-0.0394744	-0.0355946	0.00346147	0.00367516	0.01227
0.843333	0.142661	0.181072	0.0581682	0.0682118	-0.00161812	0.0172906	0.0301374		0.843333	-0.0275304	-0.0281529	-0.0382038	-0.0325855	-0.00177734	0.00532454	0.00511061
0.846667	0.141514	0.176819	0.0546056	0.0671802	9.219e-05	0.0164609	0.0251414		0.846667	-0.0302454	-0.0209896	-0.0409523	-0.0373515	0.00085594	0.00482105	0.00917842
0.85	0.146886	0.17792	0.0543978	0.0691769	0.00100973	0.0228992	0.0253138		0.85	-0.0269176	-0.0301653	-0.0386922	-0.0383835	0.00409877	0.00857293	0.00985406
0.853333	0.143269	0.179559	0.0534241	0.0710798	0.00418162	0.021405	0.0272447		0.853333	-0.025712	-0.0228384	-0.0393934	-0.0337379	6.123e-05	0.00959026	0.0122415
0.856667	0.145132	0.184644	0.0550617	0.0739737	-0.00052937	0.0166225	0.0313051		0.856667	-0.0271934	-0.024459	-0.0392249	-0.0328179	0.00102656	0.00673648	0.00716453
0.86	0.142554	0.178492	0.0542695	0.0729615	-0.00248809	0.0195843	0.0286463		0.86	-0.0286271	-0.0264549	-0.0416446	-0.0366358	0.00067457	0.0074625	0.0123776
0.863333	0.14219	0.181728	0.0579492	0.0741487	-0.00123387	0.0242498	0.0252067		0.863333	-0.0282709	-0.0228849	-0.0422769	-0.0372343	-0.0004349	0.00645825	0.0109487
0.866667	0.148882	0.178999	0.0557219	0.070874	0.00140882	0.0190922	0.0311683		0.866667	-0.0252312	-0.0238511	-0.0370208	-0.0382076	0.00184613	0.00647084	0.00739905
0.87	0.147666	0.181	0.0576105	0.0704813	0.00291254	0.0197257	0.0268442		0.87	-0.0259451	-0.0227175	-0.0401082	-0.0351118	-0.0001531	0.0117916	0.0114867
0.873333	0.147619	0.183623	0.0597915	0.0706491	-0.001507	0.0195278	0.0318589		0.873333	-0.030368	-0.0256029	-0.0448787	-0.0346082	4.864e-05	0.0123698	0.0110595
0.876667	0.14599	0.181049	0.0541872	0.0694323	-0.00307783	0.0196998	0.0306082		0.876667	-0.0249592	-0.0265543	-0.0359146	-0.0344672	0.00503759	0.0072364	0.0109208
0.88	0.143769	0.184612	0.0590421	0.0687272	-0.00247859	0.0233674	0.0300229		0.88	-0.029056	-0.0266237	-0.0423379	-0.034305	-0.00081194	0.011127	0.0100813
0.883333	0.150373	0.185457	0.0568759	0.0733676	0.00076123	0.0213499	0.0269771		0.883333	-0.0290447	-0.0244003	-0.0399598	-0.0364094	-0.00012868	0.0107604	0.0126925
0.886667	0.147505	0.183395	0.0527489	0.0730515	0.00057621	0.0214319	0.0293754		0.886667	-0.0242428	-0.0252898	-0.0417769	-0.0387078	0.00462067	0.00652699	0.0105933
0.89	0.146689	0.185515	0.0534076	0.0718979	-0.00045118	0.0223367	0.0316989		0.89	-0.0308736	-0.0193607	-0.0409861	-0.0403596	0.00322156	0.00466286	0.0100687
0.893333	0.151186	0.182503	0.0547482	0.0662791	-0.00018227	0.0253151	0.0300776		0.893333	-0.0315794	-0.0265893	-0.0442064	-0.0382259	-0.00235444	0.0105963	0.0123467
0.896667	0.148709	0.184202	0.0589018	0.0696181	0.0006421	0.0283009	0.0360236		0.896667	-0.024851	-0.0233433	-0.0400014	-0.0406447	0.00189745	0.0094178	0.0111651
0.9	0.146829	0.185433	0.0535975	0.071822	0.00191894	0.0241369	0.0357746		0.9	-0.0291877	-0.0272333	-0.0404838	-0.0320597	-0.00105768	0.00549528	0.00841527
0.903333	0.148701	0.18268	0.0537316	0.0673508	0.00274966	0.0235058	0.0365074		0.903333	-0.0308186	-0.0231361	-0.045535	-0.0413396	0.00548622	0.00920903	0.00969459
0.906667	0.151564	0.185626	0.0529048	0.0730259	0.00257859	0.0240705	0.0310689		0.906667	-0.0280732	-0.0259142	-0.0448698	-0.0357774	0.00482768	0.00838383	0.0162357
0.91	0.150765	0.187992	0.0512978	0.0699194	0.00264309	0.0272498	0.0352031		0.91	-0.027012	-0.0253047	-0.0430493	-0.0392574	-0.00041646	0.0110841	0.0124498
0.913333	0.151535	0.185553	0.0570656	0.07217	0.00092206	0.0267056	0.0351218		0.913333	-0.0297232	-0.0281393	-0.0426709	-0.0387449	-0.00165759	0.00907612	0.0116367
0.916667	0.149466	0.182264	0.0571834	0.0687425	-0.00332414	0.0299312	0.0380119		0.916667	-0.0314256	-0.0278477	-0.0403103	-0.0399554	0.00203684	0.0159032	0.0108215
0.92	0.149486	0.191168	0.0554762	0.0737829	-0.00302209	0.024243	0.0307334		0.92	-0.0272311	-0.0256367	-0.0420932	-0.0388748	0.0017362	0.0111666	0.0102139
0.923333	0.148196	0.185899	0.0588254	0.0724518	0.0006601	0.0294076	0.0327155		0.923333	-0.0329969	-0.0293313	-0.0475173	-0.0409242	0.00215307	0.0109192	0.0103047
0.926667	0.152635	0.189587	0.0560578	0.0728986	-0.00063857	0.0260399	0.0324827		0.926667	-0.0315093	-0.0238841	-0.0407423	-0.0420362	0.003518	0.0122828	0.0148038
0.93	0.151303	0.187725	0.0569266	0.0722866	0.00162473	0.0275767	0.0341258		0.93	-0.0291016	-0.0279715	-0.0386881	-0.0361504	-0.00138948	0.0106638	0.0146451
0.933333	0.154054	0.184811	0.0552333	0.0735357	0.00038738	0.0304619	0.0338939		0.933333	-0.0337957	-0.0268645	-0.0437827	-0.0404369	0.00520965	0.0135372	0.013219
0.936667	0.147155	0.190372	0.0558177	0.0696134	0.00054481	0.0280245	0.0336824		0.936667	-0.0319782	-0.0271521	-0.0429589	-0.0348694	0.00157965	0.015375	0.0128196
0.94	0.153437	0.190171	0.0576325	0.0652163	0.00283189	0.0293619	0.0379617		0.94	-0.0318712	-0.0258108	-0.0462199	-0.0396798	0.00111946	0.0151543	0.0137094
0.943333	0.148879	0.188355	0.0570225	0.0726729	-0.00209067	0.0288107	0.0369112		0.943333	-0.0347075	-0.0268683	-0.0439995	-0.0453047	0.00265489	0.0105151	0.0142912
0.946667	0.147032	0.1849	0.0585527	0.072492	0.00062506	0.0243011	0.032602		0.946667	-0.0316875	-0.025506	-0.0472683	-0.0410121	0.00651171	0.0106332	0.0166333
0.95	0.153244	0.192251	0.0571818	0.0677055	0.00040902	0.0254316	0.037819		0.95	-0.033489	-0.0269064	-0.0460263	-0.040024	-0.00386624	0.0130086	0.0189297
0.953333	0.152829	0.194133	0.0533407	0.0715786	0.00264981	0.0280178	0.0350536		0.953333	-0.0272624	-0.0306377	-0.0446517	-0.0419166	0.00185076	0.013689	0.0157829
0.956667	0.153017	0.187646	0.0573068	0.0735646	-0.00074957	0.0294203	0.037823		0.956667	-0.033136	-0.0238049	-0.0454431	-0.0376898	-0.00196615	0.0123121	0.0153595
0.96	0.155264	0.187865	0.056759	0.0690724	-0.00294287	0.0285212	0.0393602		0.96	-0.0307798	-0.0224899	-0.0425361	-0.0379453	0.00483237	0.0177181	0.0186165
0.963333	0.153141	0.193704	0.05229	0.0741703	-0.00190717	0.0296069	0.0391157		0.963333	-0.0302288	-0.0232732	-0.0471868	-0.0427674	0.00149819	0.0141501	0.0165098
0.966667	0.153725	0.194947	0.0571028	0.0689297	-0.00163444	0.0277761	0.0402974		0.966667	-0.0305056	-0.0259348	-0.0480404	-0.0416774	0.0024375	0.00728859	0.0179379
0.97	0.1593	0.192199	0.0521695	0.0740558	-0.0012157	0.0292884	0.038536		0.97	-0.0347041	-0.02757	-0.0447373	-0.0410843	0.00136008	0.0115473	0.0107113
0.973333	0.157092	0.19222	0.0527717	0.0725374	-6.795e-05	0.0316522	0.0376165		0.973333	-0.0310701	-0.0288293	-0.0431067	-0.0405117	-0.00137279	0.0121264	0.0165579
0.976667	0.161815	0.188398	0.0558331	0.0684086	0.0004919	0.0282894	0.0369277		0.976667	-0.0352333	-0.030857	-0.0501935	-0.0389125	0.00486692	0.0174367	0.0129326
0.98	0.156193	0.191673	0.0557436	0.0730553	-0.00052476	0.0296434	0.039071		0.98	-0.0301095	-0.0288658	-0.046146	-0.0392847	0.00387823	0.0118392	0.0202771
0.983333	0.156312	0.195613	0.0542921	0.0758435	-0.00138043	0.0302764	0.034813		0.983333	-0.0310875	-0.0273899	-0.0436799	-0.0418021	-0.00219432	0.0140075	0.0186742
0.986667	0.158943	0.189927	0.0577966	0.0725054	-0.00209903	0.0305946	0.0437835		0.986667	-0.0329352	-0.025226	-0.0457344	-0.0403179	0.00240647	0.0175136	0.0214703
0.99	0.154938	0.193953	0.0563302	0.0705621	0.00021103	0.0290095	0.0409545		0.99	-0.0325438	-0.0301197	-0.046649	-0.0414059	0.00162301	0.0135057	0.0183895
0.993333	0.150705	0.192923	0.0548564	0.0714508	-0.00411977	0.0311276	0.0413706		0.993333	-0.032522	-0.0295615	-0.0497216	-0.0405022	0.00288833	0.0131927	0.0215181
0.996667	0.153345	0.192445	0.060611	0.0755005	0.00575692	0.0343122	0.0445132		0.996667	-0.0318826	-0.0299084	-0.0472799	-0.0431964	0.00084926	0.0149021	0.0165557
1	0.160733	0.194182	0.0533349	0.0679514	0.00391461	0.0337909	0.0427009		1	-0.00427357	0.0133291	-0.0172994	0.0018878	-0.0108585	0.0151241	0.0190302
1.00333	0.155402	0.195121	0.0514958	0.0685366	-0.00158895	0.033746	0.0425183		1.00333	0.0138858	0.0311854	-0.00527515	0.0172159	-0.009672	0.0136676	0.0180783
1.00667	0.155762	0.197444	0.0553724	0.0705443	-0.00379727	0.0384164	0.0445908		1.00667	0.0373295	0.0486082	-0.00320242	0.0275925	-0.00710303	0.0183799	0.0164545
1.01	0.155632	0.19543	0.0544235	0.0723483	-0.00071235	0.0344365	0.041655		1.01	0.0549706	0.0661018	-0.00545713	0.0331901	-0.0084251	0.0183382	0.0183747
1.01333	0.157012	0.194639	0.0548098	0.0728733	0.00189923	0.0345306	0.0425739		1.01333	0.0657544	0.0842739	0.00455731	0.03658	-0.00800167	0.016257	0.0167409
1.01667	0.154433	0.193729	0.0556434	0.0718351	-0.00190327	0.0315336	0.044445		1.01667	0.0800598	0.0935949	0.00188708	0.0394324	-0.00787118	0.0168545	0.0216236
1.02	0.158656	0.193812	0.0514929	0.0680014	-0.00546529	0.0305666	0.0422833		1.02	0.0932958	0.106621	0.0028794	0.0472968	-0.0102288	0.0207781	0.0173299
1.02333	0.159162	0.198061	0.0546062	0.0737609	0.00084941	0.0366534	0.0439328		1.02333	0.0998221	0.115289	0.00893486	0.0459524	-0.00923167	0.0205625	0.0225684
1.02667	0.159716	0.195902	0.0539364	0.0721284	0.00048725	0.0327553	0.0454665		1.02667	0.110808	0.126223	0.00537372	0.0462551	-0.00966564	0.0185298	0.0183242
1.03	0.158535	0.198512	0.051487	0.0685715	0.00010248	0.03708	0.0447498		1.03	0.118786	0.130425	0.00627025	0.0520781	-0.00986428	0.0213987	0.0225708
1.03333	0.159792	0.199973	0.0558584	0.075298	-0.00412594	0.0369246	0.043059		1.03333	0.126874	0.141033	0.00806898	0.0491386	-0.00599464	0.0148	0.0211003
1.03667	0.162007	0.199429	0.0560932	0.072082	0.00262892	0.0322907	0.0463996		1.03667	0.13489	0.151074	0.0083617	0.0540194	-0.0123438	0.015804	0.0223414
1.04	0.15649	0.195386	0.0581016	0.0713226	0.00028812	0.031988	0.0457201		1.04	0.140145	0.155025	0.0150435	0.0535591	-0.0148912	0.0157524	0.0204515
1.04333	0.158138	0.196357	0.0537854	0.0700792	-0.00160296	0.0365182	0.0444128		1.04333	0.150842	0.162625	0.0145138	0.0530924	-0.00977343	0.0207755	0.0206243
1.04667	0.1592	0.196168	0.0582242	0.0748275	-0.000923	0.0371392	0.0500223		1.04667	0.159016	0.171304	0.00742131	0.0526355	-0.0114377	0.0180481	0.0202334
1.05	0.158284	0.20025	0.0560142	0.0759827	1.782e-05	0.0335628	0.0465873		1.05	0.16747	0.177706	0.00801327	0.0536068	-0.00975071	0.0176313	0.0203029
1.05333	0.161558	0.200266	0.0565439	0.0704511	-0.0030477	0.0347718	0.0495763		1.05333	0.167787	0.182741	0.00742194	0.0560418	-0.00672041	0.0169541	0.0240656
1.05667	0.156974	0.197147	0.0523535	0.0724174	0.00290872	0.0371174	0.0477586		1.05667	0.175916	0.187799	0.0115671	0.0575997	-0.00667551	0.0182799	0.0252
1.06	0.161301	0.198724	0.0540785	0.0732243	0.00034264	0.0385559	0.0420015		1.06	0.178764	0.190703	0.0205528	0.0577148	-0.0110822	0.0180111	0.0182636
1.06333	0.163259	0.199651	0.0572239	0.0745853	0.00230855	0.0360958	0.0440288		1.06333	0.186662	0.203207	0.0140802	0.0585731	-0.00758233	0.022687	0.0250324
1.06667	0.158617	0.198047	0.0553214	0.0729174	-0.00182716	0.037876	0.0445832		1.06667	0.189159	0.206737	0.018539	0.0606166	-0.0106339	0.0157793	0.0237913
1.07	0.158179	0.197835	0.0551776	0.073141	0.00374914	0.0351456	0.0428391		1.07	0.192778	0.210261	0.0135121	0.0586586	-0.00719357	0.0221671	0.0256397
1.07333	0.161537	0.198802	0.0582953	0.071077	-0.00348536	0.0348796	0.0462187		1.07333	0.20018	0.214476	0.0184112	0.0558926	-0.0067892	0.0162372	0.0234455
1.07667	0.160996	0.203147	0.0542212	0.0735832	-0.00265931	0.0346307	0.0431436		1.07667	0.208974	0.218227	0.016676	0.060675	-0.0113914	0.0139653	0.021483
1.08	0.163625	0.201033	0.0519856	0.0731204	0.00011607	0.0349369	0.0501128		1.08	0.210743	0.222458	0.021731	0.0652343	-0.00983303	0.0179947	0.0204717
1.08333	0.160022	0.201889	0.0569764	0.0742997	-0.00044301	0.0364763	0.0476474		1.08333	0.210246	0.223566	0.0167527	0.060244	-0.0140234	0.0196593	0.0253268
1.08667	0.162128	0.197754	0.0558203	0.0718309	-0.00145514	0.0396646	0.0450485		1.08667	0.215031	0.233742	0.0162366	0.0593827	-0.011369	0.0208145	0.0225446
1.09	0.163235	0.20083	0.0564927	0.0756323	0.00378561	0.0410642	0.0445081		1.09	0.221016	0.238461	0.0172033	0.0635409	-0.006898	0.0178008	0.0260777
1.09333	0.164742	0.204267	0.057451	0.0708252	-0.00269555	0.0374759	0.0435828		1.09333	0.222506	0.240012	0.015856	0.0595983	-0.00708204	0.018747	0.0258919
1.09667	0.163234	0.198804	0.0577524	0.0722799	-0.00083752	0.0448396	0.049023		1.09667	0.228397	0.248496	0.0175399	0.0624849	-0.0099314	0.0207924	0.0235388
1.1	0.162393	0.198451	0.0570875	0.074081	0.00127549	0.0396154	0.0468686		1.1	0.23499	0.251473	0.0212992	0.063045	-0.00833311	0.022636	0.0208414
1.10333	0.156861	0.201874	0.0544759	0.0699818	0.00049989	0.0346678	0.0484979		1.10333	0.23579	0.254325	0.0172278	0.0673242	-0.00804314	0.0212136	0.0255474
1.10667	0.160046	0.19878	0.0570905	0.0725461	-0.00285604	0.0413623	0.0509133		1.10667	0.241649	0.256517	0.0179638	0.0664618	-0.0127462	0.023313	0.0234777
1.11	0.15936	0.204695	0.0528216	0.0693258	0.00399093	0.0389441	0.0497468		1.11	0.243589	0.261238	0.0208262	0.0644622	-0.00901868	0.0221216	0.0302477
1.11333	0.162	0.202099	0.0545762	0.0732847	-0.0005029	0.0416431	0.0471781		1.11333	0.242336	0.266359	0.0199626	0.0649769	-0.00958248	0.0229826	0.0291015
1.11667	0.163102	0.204275	0.0563799	0.073666	-0.00043285	0.0409774	0.0504867		1.11667	0.245818	0.267793	0.0200598	0.0652718	-0.00754356	0.0189101	0.0254206
1.12	0.162809	0.199342	0.0575078	0.0724609	0.00272431	0.0403953	0.0474939		1.12	0.250656	0.269857	0.0198506	0.0710384	-0.0088202	0.0225526	0.0255956
1.12333	0.160913	0.203063	0.0583745	0.074767	0.00132949	0.0413142	0.0484901		1.12333	0.25826	0.274939	0.0218093	0.0663296	-0.00821063	0.0215276	0.0250327
1.12667	0.163958	0.206522	0.055073	0.0719095	-0.0036805	0.0389093	0.0540743		1.12667	0.259157	0.269877	0.0239915	0.0682453	-0.00571679	0.0260176	0.0262432
1.13	0.163387	0.20437	0.0534205	0.0716602	-5.221e-05	0.040359	0.0518346		1.13	0.256397	0.27948	0.0216668	0.071433	-0.00529824	0.0237239	0.0274767
1.13333	0.163702	0.206449	0.0575093	0.0701347	-0.00196828	0.0384037	0.0495983		1.13333	0.268147	0.284	0.0189161	0.0727047	-0.00945265	0.0269422	0.0226894
1.13667	0.161249	0.208108	0.0571768	0.0702224	-0.00148462	0.0404789	0.0512992		1.13667	0.267761	0.285471	0.0208907	0.0686667	-0.00733139	0.0229859	0.0297094
1.14	0.163713	0.202352	0.0536115	0.0713659	-0.00164352	0.0418559	0.0476748		1.14	0.272379	0.290739	0.0196588	0.0708557	-0.00923019	0.0265489	0.0292512
1.14333	0.162193	0.201233	0.0561512	0.0734489	0.00274498	0.044722	0.0538577		1.14333	0.275733	0.293232	0.0250596	0.0709095	-0.00951543	0.0241343	0.0279742
1.14667	0.162933	0.204112	0.0540571	0.0747098	0.00283137	0.0374796	0.0541834		1.14667	0.278361	0.293693	0.0241057	0.0705603	-0.0067691	0.0246875	0.028615
1.15	0.163796	0.199712	0.0565448	0.074883	3.347e-05	0.0428385	0.0547381		1.15	0.277302	0.299566	0.0257618	0.0726418	-0.00711182	0.0223819	0.0298495
1.15333	0.165362	0.205064	0.0530055	0.0714426	-0.00304713	0.03514	0.0506023		1.15333	0.28519	0.301776	0.0243028	0.0707364	-0.00397858	0.0233096	0.0274561
1.15667	0.167287	0.207844	0.0586819	0.0710074	-0.00265772	0.0436206	0.0545156		1.15667	0.285211	0.301556	0.0217437	0.0723959	-0.00675625	0.0244386	0.0292473
1.16	0.164731	0.206416	0.0563491	0.0699773	-0.00338569	0.0446268	0.0484019		1.16	0.289949	0.305894	0.0208703	0.0728279	-0.00852604	0.0228124	0.0248695
1.16333	0.166986	0.201658	0.0545514	0.0770106	-0.00094392	0.0407371	0.0531088		1.16333	0.292048	0.303359	0.0250808	0.0720849	-0.00364559	0.0208296	0.030632
1.16667	0.164801	0.204746	0.0557918	0.0744823	-0.00187119	0.0445169	0.0534756		1.16667	0.288296	0.310946	0.0184697	0.0797833	-0.00783657	0.0256073	0.0300856
1.17	0.163567	0.204296	0.0550853	0.0705937	-0.0016314	0.0462024	0.0510513		1.17	0.293404	0.312921	0.020483	0.0721002	-0.0103505	0.0247785	0.0293975
1.17333	0.166844	0.206521	0.0566491	0.070942	-0.00239161	0.045222	0.0566872		1.17333	0.294413	0.31423	0.0217111	0.0734208	-0.0101805	0.025111	0.0292849
1.17667	0.164812	0.205378	0.0553007	0.0758175	0.00016903	0.0404119	0.0527068		1.17667	0.300142	0.31748	0.0225622	0.0732283	-0.00764448	0.0213524	0.0305759
1.18	0.168623	0.208251	0.0570508	0.0724364	-0.00052923	0.0466404	0.0559345		1.18	0.30098	0.317485	0.0260274	0.0761153	-0.00433764	0.021788	0.0291192
1.18333	0.16587	0.205877	0.0543905	0.075108	0.00155787	0.0467201	0.0544977		1.18333	0.308533	0.329192	0.0276433	0.0771752	-0.00898086	0.0256543	0.0299384
1.18667	0.161956	0.204994	0.0526739	0.071374	0.0011776	0.044681	0.0519383		1.18667	0.305508	0.321564	0.0220598	0.0704875	-0.00879162	0.0217809	0.0277877
1.19	0.167317	0.206683	0.0539891	0.072908	0.00331556	0.0447344	0.0532577		1.19	0.306687	0.325099	0.0257561	0.0737599	-0.00597881	0.0272313	0.0270077
1.19333	0.159569	0.209606	0.0554938	0.0700593	0.00069671	0.0438419	0.0549658		1.19333	0.31143	0.328254	0.0243798	0.0749875	-0.0065116	0.0214104	0.028804
1.19667	0.164062	0.210282	0.0570712	0.0720905	-0.00042427	0.0465687	0.0559503		1.19667	0.313274	0.330364	0.0256712	0.0731393	-0.00380676	0.0255687	0.0275738
1.2	0.165485	0.205461	0.0527305	0.0744465	-0.00184986	0.0476145	0.0526933		1.2	0.320832	0.331152	0.0268345	0.0778591	-0.0109823	0.02419	0.0316608
1.20333	0.165313	0.205007	0.0565085	0.0693027	0.00282646	0.0456613	0.0573851		1.20333	0.322543	0.337345	0.0296401	0.0788139	-0.00895193	0.0262418	0.0297028
1.20667	0.166967	0.208763	0.0527062	0.0730414	0.0013721	0.0417145	0.0592384		1.20667	0.319375	0.333375	0.026988	0.0756166	-0.0102744	0.0230329	0.0327326
1.21	0.167077	0.207707	0.055581	0.0715844	0.00329029	0.0478359	0.0552547		1.21	0.319327	0.338708	0.0268523	0.0754893	-0.00998219	0.0251463	0.0276016
1.21333	0.166595	0.205026	0.0557	0.0734869	-0.00287066	0.0491542	0.0571561		1.21333	0.321648	0.339238	0.0264026	0.0757553	-0.00703405	0.0301802	0.0352893
1.21667	0.170103	0.210158	0.0532187	0.0730364	0.00163785	0.0535311	0.0536238		1.21667	0.324581	0.342233	0.0263341	0.0727131	-0.00862907	0.0229986	0.0304721
1.22	0.168723	0.210011	0.0569378	0.0702833	-0.00090689	0.0490607	0.0548361		1.22	0.327883	0.346371	0.0220559	0.0756866	-0.0117666	0.0292289	0.0298081
1.22333	0.165696	0.212356	0.0533872	0.0762908	-0.00038009	0.0473062	0.0583037		1.22333	0.327768	0.344862	0.024755	0.0780668	-0.00632085	0.0273903	0.0333769
1.22667	0.168152	0.210587	0.0572546	0.0742683	-4.17e-05	0.0479787	0.0589116		1.22667	0.327639	0.345442	0.0228709	0.0804445	-0.008263	0.028769	0.0308005
1.23	0.167482	0.21011	0.0586573	0.0693124	0.00155889	0.0514876	0.0585744		1.23	0.329045	0.347363	0.0269469	0.0761315	-0.00587936	0.0215268	0.0323565
1.23333	0.163445	0.205524	0.0536565	0.0769486	5.314e-05	0.046081	0.0527184		1.23333	0.332024	0.354295	0.0259143	0.0784448	-0.0120295	0.0246376	0.033477
1.23667	0.165072	0.212144	0.0574993	0.0717902	-0.0009856	0.0487959	0.0576736		1.23667	0.334359	0.353214	0.0294671	0.0745698	-0.0100661	0.0233073	0.0322781
1.24	0.166115	0.210165	0.0535076	0.0728579	-0.00169279	0.0464817	0.0569729		1.24	0.335523	0.35398	0.0197729	0.0781602	-0.00560303	0.0286035	0.0289257
1.24333	0.166367	0.211784	0.0532188	0.0745098	-0.00030066	0.0476953	0.0586675		1.24333	0.338719	0.353274	0.0292238	0.0849744	-0.00908281	0.0290957	0.0314199
1.24667	0.165244	0.209669	0.0540435	0.0723471	-0.00141274	0.0466993	0.0586136		1.24667	0.339525	0.363263	0.0276142	0.0781507	-0.00607926	0.0268072	0.033552
1.25	0.16449	0.214536	0.0579783	0.0741086	-0.00324366	0.0543406	0.0588687		1.25	0.341512	0.363362	0.021561	0.0748416	-0.00714786	0.0265878	0.028839
1.25333	0.164723	0.212923	0.0546192	0.0701315	-0.00072146	0.0498551	0.0569846		1.25333	0.339766	0.361064	0.0268806	0.0828732	-0.00560472	0.0276456	0.0321803
1.25667	0.169641	0.214269	0.0531603	0.0731198	0.0007009	0.052412	0.0628197		1.25667	0.346617	0.364079	0.0289981	0.077964	-0.00835455	0.0276311	0.0297606
1.26	0.171069	0.208275	0.0535215	0.0730737	0.00065826	0.0539699	0.0590919		1.26	0.34479	0.362015	0.0246695	0.0842336	-0.00526819	0.0272331	0.0297901
1.26333	0.166109	0.208661	0.0577788	0.0738043	-0.00360464	0.0526349	0.0606031		1.26333	0.350715	0.365293	0.0271305	0.0804457	-0.00796604	0.0275733	0.0325557
1.26667	0.169278	0.206196	0.0503103	0.0748732	0.00131023	0.0493794	0.0609116		1.26667	0.347815	0.369845	0.0229106	0.0764642	-0.00912869	0.0274862	0.0329972
1.27	0.16637	0.211619	0.051504	0.0712095	-0.00369447	0.0498673	0.0605192		1.27	0.348824	0.369072	0.0266981	0.0829128	-0.00374659	0.0290301	0.0322498
1.27333	0.168049	0.211851	0.0560777	0.0689696	-0.0045947	0.049003	0.058101		1.27333	0.34765	0.370603	0.0229056	0.0827267	-0.00929577	0.0272525	0.0327625
1.27667	0.174518	0.211521	0.0541625	0.0751205	0.0034017	0.0474315	0.0615313		1.27667	0.353971	0.370345	0.0299818	0.0817389	-0.0091485	0.0283509	0.0354659
1.28	0.169208	0.209102	0.0548816	0.0690045	0.00167206	0.0479239	0.0592923		1.28	0.356486	0.369141	0.0274171	0.0894397	-0.006001	0.0254661	0.0359559
1.28333	0.167681	0.2097	0.0537335	0.0765456	-0.00082305	0.0526477	0.057583		1.28333	0.353684	0.370135	0.0304783	0.0841924	-0.00920333	0.0288706	0.0356851
1.28667	0.168321	0.20663	0.0534298	0.0719534	-0.00540048	0.0529929	0.0602233		1.28667	0.362698	0.376523	0.0260925	0.0834793	-0.00646917	0.0281594	0.0324678
1.29	0.169666	0.211835	0.0535064	0.0718453	-0.00209534	0.0515752	0.0593883		1.29	0.358994	0.375811	0.0232203	0.0845374	-0.0103784	0.0289069	0.0364551
1.29333	0.170343	0.213064	0.0581307	0.0759881	0.00039213	0.0502908	0.0563872		1.29333	0.358259	0.380151	0.0283676	0.0835525	-0.00498003	0.0297343	0.0316812
1.29667	0.168048	0.213375	0.0556752	0.0760392	0.00164804	0.0508673	0.0614737		1.29667	0.363548	0.378546	0.0254748	0.0834584	-0.00683005	0.028674	0.0344455
1.3	0.171967	0.212496	0.0599321	0.0738021	-0.00169119	0.0531587	0.0577928		1.3	0.364147	0.37717	0.0289095	0.0805428	-0.00493709	0.0285872	0.032585
1.30333	0.171422	0.216696	0.0542375	0.0706409	-0.0014228	0.0563472	0.06194		1.30333	0.360353	0.387393	0.0267478	0.0867266	-0.0139964	0.0311246	0.0299559
1.30667	0.171742	0.214578	0.0551217	0.0730608	-0.00229795	0.0513491	0.0606253		1.30667	0.36578	0.38341	0.0260017	0.0867468	-0.009789	0.0251737	0.0352823
1.31	0.170559	0.215433	0.0569985	0.0714928	-0.00135682	0.0541829	0.0641631		1.31	0.367644	0.38453	0.0311155	0.0842877	-0.00924345	0.0276615	0.0312944
1.31333	0.173114	0.217193	0.0538531	0.0794043	-0.00157479	0.0537827	0.0611565		1.31333	0.367524	0.384666	0.0288054	0.0849138	-0.0121499	0.0302599	0.0340774
1.31667	0.170555	0.214245	0.0557318	0.0735621	-0.00295106	0.053834	0.060928		1.31667	0.367829	0.383402	0.0292414	0.0858596	-0.00679946	0.0282186	0.0347896
1.32	0.175024	0.215696	0.0578518	0.0699577	0.0001014	0.057267	0.0647259		1.32	0.369709	0.39008	0.0283236	0.085516	-0.00735944	0.0300683	0.0341873
1.32333	0.17187	0.218698	0.0527016	0.0728687	-0.00719161	0.0575242	0.0582235		1.32333	0.370244	0.392715	0.0271736	0.0840169	-0.00471517	0.0298213	0.0359129
1.32667	0.175056	0.214907	0.0544091	0.0760441	0.00141731	0.0562463	0.0644394		1.32667	0.373642	0.392021	0.0280862	0.0812629	-0.0114873	0.0275295	0.0371527
1.33	0.170021	0.210486	0.0564063	0.0713767	0.00030076	0.0520937	0.060906		1.33	0.370308	0.389057	0.0272343	0.0831168	-0.0143722	0.0293407	0.036032
1.33333	0.171326	0.213728	0.0527143	0.0740467	-0.00101735	0.0543883	0.0645127		1.33333	0.377696	0.388443	0.0287887	0.088252	-0.00480032	0.031237	0.0365328
1.33667	0.171305	0.214555	0.0531586	0.0711158	0.00251744	0.0554983	0.0618459		1.33667	0.37719	0.39298	0.0268168	0.081008	-0.00966225	0.0314843	0.0396414
1.34	0.172951	0.216349	0.0532109	0.073819	-0.00034544	0.0557742	0.0647003		1.34	0.3761	0.396362	0.0263953	0.0821232	-0.0113767	0.0321579	0.0361665
1.34333	0.171066	0.214381	0.0577328	0.0734351	-0.00458966	0.0566697	0.0630016		1.34333	0.374861	0.396201	0.023745	0.0885527	-0.0110814	0.029136	0.0384468
1.34667	0.174972	0.213231	0.0571831	0.0709436	-0.00131818	0.0556511	0.0617243		1.34667	0.381204	0.400123	0.0253243	0.0841096	-0.0106237	0.027647	0.0346312
1.35	0.175141	0.21199	0.0542362	0.0724775	0.00287929	0.0587182	0.060763		1.35	0.383956	0.398509	0.0278078	0.0885532	-0.00673754	0.0317281	0.0333673
1.35333	0.172417	0.213364	0.0541151	0.0735352	0.0001718	0.057421	0.0634129		1.35333	0.382454	0.399688	0.02658	0.0892475	-0.0030891	0.0324054	0.0345821
1.35667	0.173157	0.214123	0.055929	0.0714997	0.00161978	0.056288	0.0621752		1.35667	0.381412	0.400259	0.0274215	0.0871019	-0.00870383	0.034874	0.0404566
1.36	0.174644	0.21407	0.0551656	0.071545	-0.00026545	0.0502707	0.0609176		1.36	0.383559	0.399215	0.0280794	0.0886603	-0.00902691	0.0337922	0.0395933
1.36333	0.172044	0.218581	0.0583767	0.0711209	-0.00033308	0.0568637	0.0693845		1.36333	0.382353	0.401732	0.0235096	0.0854709	-0.00909635	0.03452	0.0378341
1.36667	0.170114	0.217402	0.0532345	0.0716327	0.000478	0.0527446	0.0661547		1.36667	0.388184	0.402868	0.0264111	0.0850168	-0.00850055	0.02967	0.0362321
1.37	0.173511	0.211974	0.0531868	0.0748398	-0.0009931	0.056136	0.0656843		1.37	0.384206	0.405453	0.0336479	0.0908993	-0.0112852	0.0307469	0.037393
1.37333	0.169231	0.218499	0.0565516	0.0748455	-0.00162903	0.0577853	0.0633306		1.37333	0.385375	0.404732	0.024965	0.0851206	-0.00748715	0.0293151	0.0337452
1.37667	0.172457	0.217904	0.0551401	0.0711722	0.00211613	0.057997	0.0704363		1.37667	0.38742	0.407753	0.0293302	0.0884938	-0.00533317	0.0274698	0.0369156
1.38	0.172048	0.218146	0.0612797	0.0756566	-0.00226056	0.0589398	0.0640285		1.38	0.392261	0.404714	0.0241659	0.0879825	-0.0107665	0.0333771	0.0425921
1.38333	0.171152	0.216553	0.0535254	0.074706	-0.0026858	0.0602677	0.0623635		1.38333	0.390352	0.411439	0.0248087	0.0901894	-0.0112008	0.0322691	0.0423693
1.38667	0.175111	0.213219	0.0545582	0.0720822	-0.00603376	0.0552412	0.0658555		1.38667	0.390191	0.411003	0.0274521	0.0864426	-0.00596583	0.0349596	0.037269
1.39	0.173779	0.220229	0.0531744	0.0695616	-0.00469579	0.0591415	0.0660908		1.39	0.391713	0.410408	0.0303642	0.0898645	-0.015352	0.0291161	0.0394322
1.39333	0.174445	0.215867	0.0584339	0.0727488	-0.00018888	0.0582406	0.0638537		1.39333	0.392944	0.413871	0.0288804	0.0875133	-0.0137356	0.0315663	0.0380606
1.39667	0.17247	0.215915	0.0552906	0.0736713	-0.00118037	0.0575289	0.0675364		1.39667	0.395443	0.411141	0.0279597	0.0921228	-0.0124889	0.0341854	0.0412336
1.4	0.172907	0.21736	0.0539525	0.0701147	-0.00204908	0.0593959	0.0666836		1.4	0.395273	0.411551	0.02736	0.0944178	-0.00696712	0.0320766	0.0377814
1.40333	0.172313	0.216123	0.0530222	0.0714399	-0.00448403	0.0621596	0.0658686		1.40333	0.39847	0.416782	0.0248044	0.0892181	-0.00937864	0.0316898	0.0362185
1.40667	0.170164	0.218487	0.0546421	0.0749589	0.00021046	0.0614298	0.0686862		1.40667	0.396391	0.412737	0.0261952	0.0922633	-0.00782692	0.0311191	0.03994
1.41	0.173268	0.215261	0.0485072	0.0737767	-0.00405442	0.0622021	0.0627111		1.41	0.398071	0.413606	0.0288149	0.0938382	-0.0123447	0.031101	0.035441
1.41333	0.172977	0.214794	0.0563205	0.0766261	-0.00278988	0.058293	0.0673202		1.41333	0.397288	0.417422	0.0315408	0.089549	-0.0090782	0.0336745	0.0356287
1.41667	0.170647	0.21528	0.057627	0.0683036	0.00036563	0.0603216	0.0681694		1.41667	0.400405	0.418095	0.0264372	0.0920077	-0.00802112	0.0341053	0.0424899
1.42	0.172935	0.222045	0.0561137	0.0723835	-0.00405055	0.0603142	0.0629635		1.42	0.396915	0.414658	0.0288582	0.0918551	-0.0090105	0.032647	0.0388385
1.42333	0.171273	0.215889	0.0530689	0.0676099	-0.00158811	0.0619662	0.0657047		1.42333	0.39995	0.421736	0.0269198	0.0910805	-0.00926371	0.0349129	0.0378739
1.42667	0.174689	0.216958	0.0503072	0.0724011	-0.00233682	0.0589082	0.0659965		1.42667	0.401876	0.41848	0.0277473	0.0858975	-0.0092282	0.03233	0.0444177
1.43	0.168981	0.216412	0.0571538	0.0737031	0.00035528	0.0597956	0.0672322		1.43	0.399876	0.419868	0.0273003	0.0848844	-0.00732356	0.0325829	0.0394039
1.43333	0.174671	0.215191	0.0560643	0.0721615	-0.00243354	0.0602424	0.062479		1.43333	0.402095	0.421482	0.0266817	0.0885312	-0.00984646	0.0335251	0.0386741
1.43667	0.172591	0.215132	0.053605	0.0694501	-0.00397237	0.0625628	0.0645066		1.43667	0.410587	0.427138	0.0230828	0.0953921	-0.0122957	0.0316287	0.0406345
1.44	0.170599	0.216657	0.0556433	0.075013	-0.00465211	0.0629863	0.0696247		1.44	0.403887	0.423104	0.0250182	0.0895209	-0.0137491	0.0339568	0.0396196
1.44333	0.173152	0.218485	0.0548848	0.0766058	-7.494e-05	0.0581852	0.063516		1.44333	0.411599	0.431649	0.0255638	0.0917465	-0.00707307	0.0358541	0.0390438
1.44667	0.169042	0.217447	0.0511459	0.0726375	-0.00034744	0.0625736	0.0681518		1.44667	0.40997	0.422972	0.0286595	0.093424	-0.00983179	0.0364866	0.0403743
1.45	0.1771	0.219593	0.0576875	0.0742209	-0.00419954	0.0572007	0.0701783		1.45	0.405496	0.425565	0.0223124	0.0892618	-0.0122134	0.0354619	0.0404518
1.45333	0.177702	0.212692	0.0542356	0.0747866	0.00054705	0.0617293	0.0678157		1.45333	0.411683	0.421338	0.0273121	0.0914869	-0.00601517	0.0383413	0.0393574
1.45667	0.169177	0.221598	0.0551285	0.0733074	-0.00551324	0.0599508	0.0705727		1.45667	0.409569	0.431338	0.0308682	0.0905637	-0.010002	0.0320293	0.0422192
1.46	0.173126	0.219605	0.0523291	0.0728613	-0.0024501	0.0598861	0.0669479		1.46	0.408564	0.426875	0.0259431	0.0926327	-0.00861083	0.0338849	0.0388691
1.46333	0.175411	0.221345	0.0552667	0.0719468	-0.00034372	0.0630527	0.067925		1.46333	0.411315	0.428805	0.028864	0.0894655	-0.00586272	0.0323872	0.0403908
1.46667	0.173792	0.2229	0.0550042	0.067503	-0.00210263	0.0642837	0.0699267		1.46667	0.418436	0.429972	0.027867	0.0926274	-0.00876104	0.0366318	0.0406706
1.47	0.175912	0.223181	0.0537421	0.0731085	-0.00251149	0.0611992	0.0655108		1.47	0.413887	0.425175	0.0276666	0.0935881	-0.00898732	0.035565	0.0419472
1.47333	0.175914	0.222153	0.0558128	0.0717812	-0.0045889	0.0616051	0.0675105		1.47333	0.41604	0.430308	0.0244227	0.0949423	-0.00812759	0.0376914	0.0430639
1.47667	0.180097	0.219133	0.058607	0.0697322	-0.00253035	0.064676	0.0697684		1.47667	0.417908	0.434716	0.0263323	0.090782	-0.0103903	0.0380327	0.0413073
1.48	0.173216	0.219091	0.055503	0.0694843	-0.00057028	0.0640158	0.0688772		1.48	0.417913	0.433894	0.0230393	0.0898839	-0.0099155	0.0377637	0.0410184
1.48333	0.174941	0.222452	0.0537737	0.0708428	7.441e-05	0.0613619	0.0664094		1.48333	0.416161	0.432017	0.0254512	0.0919699	-0.0118334	0.0368025	0.0436943
1.48667	0.175333	0.221912	0.056334	0.0743967	-0.00358826	0.0656541	0.0664109		1.48667	0.416289	0.432375	0.0255718	0.0960724	-0.0082086	0.0371443	0.0420412
1.49	0.174094	0.218824	0.0531535	0.0729056	-4.845e-05	0.0668431	0.0697616		1.49	0.417057	0.434935	0.0271839	0.0931693	-0.0074301	0.0355112	0.0394833
1.49333	0.176545	0.225414	0.052602	0.0748043	-0.0029582	0.0622198	0.0714351		1.49333	0.416118	0.433598	0.0269695	0.0971479	-0.0122056	0.037081	0.043097
1.49667	0.174868	0.218133	0.0596296	0.0769103	-0.00044391	0.0648005	0.0702043		1.49667	0.417564	0.440858	0.0294312	0.0936563	-0.0081859	0.0398617	0.0448241
1.5	0.176857	0.22199	0.0564445	0.073642	-0.00366155	0.0656522	0.0732145		1.5	0.419589	0.436176	0.0296805	0.0895359	-0.00593348	0.0341187	0.0429276
1.50333	0.17661	0.220647	0.0542874	0.0703495	-0.00194196	0.0644189	0.0729469		1.50333	0.420315	0.434674	0.0257124	0.0951991	-0.00719888	0.0402264	0.040481
1.50667	0.177746	0.221095	0.0505675	0.0704578	-0.00622526	0.0618181	0.0678149		1.50667	0.417465	0.439306	0.0253435	0.0916261	-0.00715529	0.0377865	0.0456906
1.51	0.175348	0.220613	0.0526514	0.0724248	-0.0017973	0.0638008	0.0726863		1.51	0.421201	0.438977	0.0276155	0.0930716	-0.0102225	0.0364902	0.0439775
1.51333	0.175382	0.221285	0.0552753	0.0687419	-0.00588073	0.0655363	0.0675593		1.51333	0.421635	0.440753	0.0298378	0.094399	-0.0136859	0.0354399	0.043123
1.51667	0.179126	0.219624	0.0544208	0.0733002	-0.00396528	0.063551	0.0696199		1.51667	0.423883	0.441529	0.0248323	0.08745	-0.0114396	0.0336316	0.0441798
1.52	0.176351	0.217371	0.0544807	0.0721475	-0.0033249	0.0645791	0.0700188		1.52	0.424016	0.439883	0.0263545	0.0932991	-0.00968125	0.0370888	0.043495
1.52333	0.17521	0.220714	0.0520884	0.0703747	-0.00472769	0.066546	0.072241		1.52333	0.424703	0.442625	0.0229912	0.0895592	-0.00581196	0.0365373	0.0401289
1.52667	0.175913	0.218522	0.0561902	0.0743993	-0.00591125	0.0631368	0.0708378		1.52667	0.425229	0.442906	0.0280243	0.0911546	-0.00734378	0.0387633	0.0458191
1.53	0.174581	0.224244	0.054517	0.0719274	-0.00171135	0.0675951	0.0703051		1.53	0.421383	0.445763	0.0277561	0.0896822	-0.0048467	0.0326988	0.0441568
1.53333	0.173765	0.22379	0.0557576	0.0739911	-0.00206204	0.0667361	0.0738786		1.53333	0.421088	0.445033	0.0189569	0.092521	-0.00931747	0.03844	0.0425656
1.53667	0.176283	0.224066	0.0579396	0.0699614	-0.00192781	0.0660284	0.0720901		1.53667	0.425062	0.444097	0.02641	0.0955308	-0.00881552	0.0360697	0.0421228
1.54	0.177193	0.221074	0.0548922	0.06938	-0.00467942	0.0628258	0.0707606		1.54	0.42671	0.443507	0.0219572	0.095682	-0.0078218	0.0382671	0.0432961
1.54333	0.175262	0.223048	0.0561498	0.0794051	-0.0032799	0.0617495	0.0730602		1.54333	0.42732	0.451496	0.0230064	0.0989793	-0.0145422	0.0371501	0.0487489
1.54667	0.177119	0.224855	0.0509437	0.0696039	-0.00801383	0.0681614	0.0726462		1.54667	0.425375	0.446259	0.0229301	0.0940854	-0.0130323	0.0380459	0.0452508
1.55	0.1781	0.220333	0.052254	0.0757332	0.00223887	0.0651328	0.0686163		1.55	0.42669	0.443583	0.0229577	0.0934628	-0.00978109	0.0389508	0.0441198
1.55333	0.176864	0.223397	0.0586511	0.0745355	-0.00499409	0.064318	0.0735448		1.55333	0.427542	0.446938	0.0263329	0.0956478	-0.00871303	0.0360287	0.0437965
1.55667	0.17755	0.220376	0.0546091	0.0706277	-0.0016584	0.0652698	0.0720734		1.55667	0.432567	0.447489	0.0258753	0.0937833	-0.0075338	0.0349024	0.0481731
1.56	0.179424	0.226045	0.0558473	0.0713941	-0.00235144	0.0658424	0.0742292		1.56	0.425872	0.452594	0.0253102	0.0908407	-0.00737249	0.0396014	0.0460479
1.56333	0.173336	0.222975	0.0531234	0.0747557	0.00019919	0.0677211	0.0685509		1.56333	0.430571	0.448069	0.020785	0.0995004	-0.00771141	0.0370803	0.0464868
1.56667	0.175417	0.224268	0.0553344	0.0685807	-0.0025145	0.0642069	0.0712549		1.56667	0.427372	0.450215	0.0229689	0.0938811	-0.0105181	0.0372162	0.0446238
1.57	0.176638	0.221201	0.0552771	0.0695728	-0.00122693	0.065572	0.0753871		1.57	0.431374	0.452276	0.0267416	0.0899663	-0.0119221	0.0378979	0.0484551
1.57333	0.177246	0.224212	0.0552897	0.0744573	-0.00113959	0.0632388	0.0760178		1.57333	0.432024	0.449481	0.0222051	0.0940098	-0.0114514	0.0370826	0.042459
1.57667	0.181476	0.224985	0.054816	0.0745554	0.00309663	0.0656204	0.0716372		1.57667	0.432401	0.449136	0.0248419	0.0896013	-0.010718	0.0369331	0.0482939
1.58	0.177407	0.22222	0.0518376	0.0723659	-0.00530851	0.0696957	0.0747525		1.58	0.434133	0.454209	0.0246982	0.0908816	-0.00812259	0.0381459	0.0478472
1.58333	0.177781	0.228587	0.0540774	0.0718581	-0.00360152	0.0676006	0.0710305		1.58333	0.430504	0.449898	0.0230505	0.0929969	-0.0126499	0.0405688	0.0416574
1.58667	0.177581	0.21973	0.0533552	0.0711799	-0.00183081	0.0659918	0.0741747		1.58667	0.43444	0.453363	0.0275064	0.0983696	-0.00523027	0.0419	0.0453681
1.59	0.177488	0.224317	0.0483501	0.0704076	-0.00022036	0.0697946	0.0736248		1.59	0.43687	0.458155	0.0213005	0.0955793	-0.00985368	0.0414267	0.042485
1.59333	0.17733	0.225596	0.0543887	0.0710944	-0.00433634	0.065343	0.0768879		1.59333	0.439855	0.453608	0.0210375	0.100009	-0.0079519	0.036834	0.0487954
1.59667	0.178637	0.225203	0.0512184	0.0711195	-0.00332073	0.0648329	0.0753719		1.59667	0.439523	0.457214	0.0266231	0.092484	-0.0104497	0.0370448	0.0483029
1.6	0.181609	0.227469	0.0535478	0.0753741	-0.00537682	0.0673507	0.070998		1.6	0.43319	0.455312	0.0228448	0.0947527	-0.0148287	0.0407712	0.0482065
1.60333	0.18003	0.226478	0.0516947	0.0746375	-0.00014191	0.0703489	0.0727083		1.60333	0.437237	0.454991	0.0253639	0.0925805	-0.0110024	0.043375	0.0451298
1.60667	0.17674	0.225721	0.0560428	0.0720593	-0.00374346	0.0677588	0.0743085		1.60667	0.438934	0.455039	0.0240823	0.0883315	-0.0124617	0.0419968	0.0475664
1.61	0.177906	0.225511	0.0545366	0.0732084	-0.00052367	0.0712123	0.0778956		1.61	0.43872	0.461232	0.0262445	0.0997081	-0.0100285	0.0403416	0.0468093
1.61333	0.175832	0.222326	0.0530975	0.0726133	-0.0036301	0.0637134	0.0737042		1.61333	0.441162	0.460424	0.0218823	0.094445	-0.00818255	0.0398457	0.0488336
1.61667	0.179115	0.223117	0.0542902	0.0715899	0.00084036	0.0681745	0.0729512		1.61667	0.443568	0.454294	0.0236275	0.0967931	-0.00717419	0.0371062	0.0425423
1.62	0.177854	0.222604	0.0542419	0.0747322	-0.00121858	0.0707724	0.0741559		1.62	0.4442	0.458603	0.0231516	0.0980236	-0.00880849	0.0382893	0.0505275
1.62333	0.179358	0.227044	0.0498359	0.0727087	-0.0054913	0.0688149	0.0768534		1.62333	0.438827	0.45667	0.0259279	0.0958659	-0.0100564	0.0392871	0.0539051
1.62667	0.175865	0.223529	0.0539072	0.0718462	0.00161861	0.0703806	0.0744651		1.62667	0.4382	0.458252	0.0255662	0.0977615	-0.0113021	0.0429334	0.0489135
1.63	0.17669	0.222902	0.0510861	0.0749245	-0.00243372	0.0717811	0.0766346		1.63	0.441906	0.463063	0.021779	0.0942571	-0.0156351	0.0402822	0.0485983
1.63333	0.179778	0.226137	0.0544895	0.0738418	0.00015725	0.0683955	0.0800103		1.63333	0.444303	0.461984	0.0205408	0.100313	-0.0116708	0.0437686	0.0473046
1.63667	0.180688	0.225316	0.0542796	0.0740098	0.00048424	0.0693247	0.0760689		1.63667	0.443846	0.462843	0.0227903	0.0973448	-0.00859866	0.0419757	0.0469381
1.64	0.178124	0.227304	0.0555534	0.0716291	-0.00047371	0.071832	0.0747979		1.64	0.439238	0.465608	0.0232848	0.0966616	-0.0119445	0.0384567	0.0476692
1.64333	0.179784	0.226929	0.0512634	0.070552	0.0032829	0.069722	0.0739395		1.64333	0.441426	0.463691	0.0197203	0.0952234	-0.00832669	0.0387804	0.0425174
1.64667	0.176727	0.225742	0.0584919	0.0718166	-0.00388329	0.0667039	0.0785833		1.64667	0.442946	0.461437	0.0209022	0.096129	-0.00999891	0.039583	0.0546863
1.65	0.177157	0.223878	0.0574953	0.069417	-0.00208581	0.0697698	0.0748354		1.65	0.444713	0.465342	0.0213025	0.09165	-0.00460428	0.0408911	0.0452729
1.65333	0.1775	0.22639	0.0558782	0.0750241	-0.00263644	0.070441	0.0710928		1.65333	0.444862	0.465892	0.0219284	0.098072	-0.0109592	0.0382343	0.0477359
1.65667	0.17885	0.222783	0.0527146	0.0736503	-0.00256409	0.0746827	0.0802388		1.65667	0.447063	0.465594	0.0206345	0.0949042	-0.00808407	0.0397007	0.049612
1.66	0.177117	0.22651	0.0557896	0.075501	-0.0051225	0.0707508	0.0784249		1.66	0.444933	0.469096	0.0223105	0.0917085	-0.0123642	0.0405039	0.048522
1.66333	0.181332	0.225879	0.0567646	0.0722391	-0.00442306	0.072511	0.0769785		1.66333	0.446645	0.468654	0.0205051	0.0969849	-0.00972273	0.042679	0.0484772
1.66667	0.181324	0.223349	0.055124	0.0760566	0.00104996	0.0708931	0.0795538		1.66667	0.447091	0.463285	0.0226945	0.0936439	-0.00894483	0.0422384	0.0440797
1.67	0.182643	0.228417	0.0497048	0.0744028	-0.0035296	0.0733806	0.0793435		1.67	0.445461	0.467937	0.0196169	0.097085	-0.0113733	0.0428156	0.0470096
1.67333	0.179365	0.226641	0.0486785	0.0733216	-0.0031728	0.0723396	0.0785614		1.67333	0.445571	0.469298	0.0236861	0.0997376	-0.00630586	0.0412784	0.0455055
1.67667	0.178564	0.229445	0.0491094	0.0727224	-0.00310182	0.0733417	0.0762474		1.67667	0.444016	0.467579	0.0248272	0.0907494	-0.00515229	0.0429222	0.0499726
1.68	0.178761	0.224684	0.0577829	0.075447	-0.00349551	0.0727904	0.0745677		1.68	0.44756	0.467746	0.0236216	0.0971344	-0.0125439	0.0420161	0.0464039
1.68333	0.178566	0.224431	0.0567445	0.0749479	-0.00398217	0.073039	0.0796647		1.68333	0.450266	0.467762	0.0194499	0.0964083	-0.00876079	0.0407073	0.0490506
1.68667	0.173872	0.222192	0.0564125	0.0764499	-7.495e-05	0.0703331	0.0804546		1.68667	0.447716	0.469301	0.0217228	0.0982694	-0.00724292	0.0403266	0.0503058
1.69	0.178572	0.229507	0.0511797	0.072657	-0.00606333	0.0728085	0.0802537		1.69	0.443684	0.46531	0.0258606	0.0944173	-0.00976173	0.0463796	0.0541559
1.69333	0.182019	0.227326	0.0553018	0.0733293	-0.0030651	0.0735029	0.0795468		1.69333	0.447084	0.473056	0.0212299	0.0950567	-0.00889191	0.0382714	0.0526801
1.69667	0.17924	0.229004	0.0511942	0.072588	0.00061949	0.0730928	0.0806485		1.69667	0.452811	0.47029	0.0223412	0.0923984	-0.00778048	0.0466958	0.0456142
1.7	0.173721	0.226768	0.0515876	0.0726593	-0.0046102	0.073496	0.0762949		1.7	0.449001	0.4705	0.0178734	0.0926846	-0.00939212	0.0428362	0.0489757
1.70333	0.177467	0.232887	0.0547139	0.0732683	-0.004773	0.0749995	0.0805292		1.70333	0.458169	0.467839	0.024724	0.0974072	-0.0126575	0.0416665	0.049154
1.70667	0.179128	0.230624	0.0561227	0.0706333	-0.00119691	0.0736238	0.0823561		1.70667	0.451066	0.468417	0.0217405	0.101358	-0.00314852	0.0444711	0.0489282
1.71	0.180422	0.22402	0.0501207	0.0776238	-0.0049264	0.068716	0.0789448		1.71	0.44864	0.470603	0.0184614	0.0923391	-0.0104109	0.0404726	0.045568
1.71333	0.179687	0.230274	0.0566034	0.0740898	0.0009773	0.0761888	0.0793098		1.71333	0.455176	0.471248	0.0175112	0.0909414	-0.0126802	0.043521	0.0509132
1.71667	0.179969	0.22206	0.0542397	0.0696968	-0.00390584	0.0758684	0.0824535		1.71667	0.458974	0.470428	0.0246441	0.0944811	-0.00646135	0.0422639	0.0489438
1.72	0.182335	0.226078	0.0528804	0.0752067	-0.00459695	0.076043	0.077507		1.72	0.450611	0.473511	0.0201042	0.0936824	-0.0115451	0.0444561	0.0520619
1.72333	0.17944	0.226553	0.0496793	0.0722458	-0.00793609	0.0731589	0.0799951		1.72333	0.450315	0.47177	0.0235595	0.0956469	-0.0103008	0.0387363	0.0492836
1.72667	0.181259	0.229033	0.0545523	0.0755609	-0.00162645	0.0738106	0.0766386		1.72667	0.451389	0.472831	0.0209698	0.0988371	-0.0149462	0.0425041	0.0552002
1.73	0.18163	0.226467	0.053262	0.0721849	0.00014796	0.0695046	0.0813666		1.73	0.45274	0.472094	0.0213994	0.0906568	-0.00617501	0.0440904	0.0550418
1.73333	0.179219	0.229192	0.0539737	0.073509	-0.00634941	0.0772618	0.0813367		1.73333	0.452292	0.472969	0.0190756	0.0949087	-0.012993	0.0428588	0.0505582
1.73667	0.179305	0.228353	0.0537291	0.0700825	-0.00520052	0.0767312	0.0830189		1.73667	0.45419	0.473465	0.0214759	0.0995266	-0.0121165	0.0430912	0.0511607
1.74	0.180325	0.227816	0.0549231	0.074346	-0.00326741	0.0747222	0.0793561		1.74	0.451383	0.474051	0.0235924	0.0894261	-0.0123967	0.0450033	0.0483447
1.74333	0.178648	0.232862	0.0566665	0.0763004	-0.00056783	0.0749861	0.0803739		1.74333	0.453235	0.474306	0.020336	0.0946036	-0.00825366	0.0425377	0.0510352
1.74667	0.177038	0.228771	0.0564318	0.0678837	-0.00555723	0.0738213	0.0793403		1.74667	0.461274	0.474451	0.0220617	0.0995391	-0.00766494	0.0414448	0.0532787
1.75	0.17999	0.230048	0.0541297	0.0724074	-0.00386947	0.0755119	0.0844537		1.75	0.458651	0.477497	0.0197981	0.0949674	-0.0131809	0.0456598	0.0499623
1.75333	0.180349	0.228958	0.0513679	0.0767701	-0.00346476	0.0761741	0.0758595		1.75333	0.455606	0.479332	0.0190542	0.0957369	-0.0138517	0.0416742	0.0535619
1.75667	0.183102	0.229078	0.049518	0.0727232	-0.00478391	0.0752658	0.0818273		1.75667	0.459691	0.476667	0.0189074	0.0941417	-0.011815	0.0420243	0.0513105
1.76	0.181055	0.229856	0.054477	0.0732807	-0.00323731	0.0714342	0.0846546		1.76	0.457588	0.478486	0.0192743	0.0963355	-0.00722441	0.0422148	0.0524274
1.76333	0.181043	0.22615	0.0540587	0.0709342	-0.00054109	0.0776546	0.0769984		1.76333	0.458724	0.477434	0.0184507	0.0963352	-0.0105821	0.0439755	0.0520297
1.76667	0.181462	0.231809	0.05433	0.0723242	-0.00165054	0.0773341	0.07702		1.76667	0.457314	0.477412	0.0217335	0.0967552	-0.00887613	0.0486294	0.0502094
1.77	0.182597	0.233348	0.0517835	0.0758579	-0.00498902	0.0766278	0.0794838		1.77	0.458273	0.478351	0.0208194	0.0972115	-0.00912238	0.0423719	0.0481978
1.77333	0.18286	0.229995	0.0530592	0.0718469	-0.00096315	0.0738412	0.0821968		1.77333	0.45759	0.475336	0.0163472	0.0954418	-0.0168531	0.045455	0.0511535
1.77667	0.180538	0.231978	0.0561287	0.072775	-0.00388323	0.0770951	0.0790582		1.77667	0.460865	0.480144	0.0177538	0.0926234	-0.0114633	0.0439266	0.0524539
1.78	0.18382	0.232454	0.0516505	0.0744139	-0.00218673	0.073635	0.0772732		1.78	0.459283	0.482736	0.023227	0.0956899	-0.00805803	0.0499819	0.052695
1.78333	0.182996	0.232149	0.0526376	0.0739749	-0.00070441	0.0792528	0.0777409		1.78333	0.463462	0.483128	0.0188453	0.0972195	-0.0118841	0.044473	0.0541104
1.78667	0.184498	0.229262	0.0576638	0.0757697	-0.00524166	0.0767431	0.0801073		1.78667	0.461527	0.483231	0.0215935	0.0925169	-0.010655	0.0407048	0.0557169
1.79	0.179549	0.229213	0.0548177	0.0739129	-0.00337758	0.0785737	0.0802404		1.79	0.46268	0.482556	0.0184945	0.0932107	-0.0158283	0.0438393	0.0509519
1.79333	0.174322	0.229796	0.054796	0.0720574	-0.00679793	0.0808025	0.0843156		1.79333	0.460486	0.484777	0.02176	0.0898702	-0.0072113	0.0446865	0.0578693
1.79667	0.179395	0.227869	0.0538746	0.0754187	-0.00116247	0.0726881	0.082792		1.79667	0.460754	0.475237	0.0164353	0.100852	-0.00765429	0.0449894	0.0566018
1.8	0.178488	0.229341	0.0527344	0.0764195	-0.00127673	0.0761923	0.0787281		1.8	0.464188	0.483898	0.0197494	0.0973109	-0.0127762	0.0462222	0.0516958
1.80333	0.180818	0.230809	0.0523957	0.0694939	-0.00479558	0.0751987	0.0765369		1.80333	0.463018	0.481247	0.0193215	0.0936641	-0.00793978	0.0449543	0.0545249
1.80667	0.180224	0.231281	0.0566286	0.0725461	-0.0071372	0.0763337	0.0812024		1.80667	0.462457	0.48274	0.0179592	0.0958458	-0.00794523	0.0471033	0.0588137
1.81	0.183441	0.22957	0.0520892	0.0715051	-0.0036075	0.0744709	0.079676		1.81	0.464491	0.483179	0.0169212	0.0978993	-0.0137345	0.045047	0.0537405
1.81333	0.182422	0.230301	0.0548082	0.070335	-0.00335006	0.0795143	0.0855341		1.81333	0.464895	0.488057	0.0174458	0.0973812	-0.0102398	0.0463467	0.0524659
1.81667	0.183697	0.2303	0.0494144	0.0739913	-0.00520004	0.0783138	0.085313		1.81667	0.464451	0.486853	0.0180735	0.0940189	-0.00607027	0.0417487	0.0504077
1.82	0.183266	0.230162	0.0511413	0.0724082	-0.00024413	0.0781138	0.0865123		1.82	0.463185	0.479808	0.0181996	0.0931105	-0.0123522	0.0457668	0.055155
1.82333	0.177474	0.235816	0.0506244	0.069382	-0.00588689	0.0786625	0.0847019		1.82333	0.460439	0.485293	0.0182294	0.0958509	-0.0101054	0.0463564	0.0528012
1.82667	0.183239	0.235093	0.0562576	0.0711926	-0.00387437	0.073847	0.082778		1.82667	0.467508	0.482946	0.0236936	0.095273	-0.0071956	0.0446156	0.057501
1.83	0.179029	0.231999	0.0521134	0.0724069	-0.00345933	0.0785272	0.0810741		1.83	0.467466	0.477669	0.015775	0.0916208	-0.00634984	0.0440157	0.0537904
1.83333	0.179782	0.231936	0.0535395	0.069098	-0.0030852	0.0827244	0.0844246		1.83333	0.463604	0.482425	0.0194454	0.0899743	-0.00939915	0.0470069	0.0559878
1.83667	0.18356	0.231396	0.0514572	0.0716784	-0.00492381	0.0789758	0.0846591		1.83667	0.467233	0.483408	0.0174736	0.0984732	-0.00978382	0.0487461	0.0502919
1.84	0.181882	0.231032	0.0574359	0.0710609	0.00162389	0.0780582	0.0815865		1.84	0.46332	0.485634	0.018324	0.0952574	-0.00908702	0.0493765	0.0547339
1.84333	0.183938	0.232385	0.05116	0.0754999	-0.00619855	0.0808965	0.0853046		1.84333	0.46782	0.489827	0.0192386	0.0972614	-0.0106429	0.0449451	0.0507218
1.84667	0.182815	0.231865	0.054858	0.0732539	-0.00241559	0.0807891	0.0832332		1.84667	0.463266	0.483062	0.0148622	0.0934517	-0.0105735	0.0479027	0.0563723
1.85	0.181325	0.233517	0.0496741	0.0766771	-0.00315994	0.083059	0.0842663		1.85	0.464501	0.485337	0.0181024	0.092859	-0.0106501	0.0486359	0.0574614
1.85333	0.179788	0.227264	0.0514935	0.0712942	-0.00401839	0.0818311	0.0817184		1.85333	0.466455	0.484809	0.0164132	0.0985657	-0.0117526	0.0452739	0.053001
1.85667	0.181787	0.228827	0.0524446	0.0707025	-0.00383441	0.0764219	0.083382		1.85667	0.468161	0.486814	0.0156123	0.0917566	-0.00457079	0.0455552	0.0505653
1.86	0.18242	0.233603	0.0551981	0.0734304	-0.00317365	0.0782699	0.0851504		1.86	0.462754	0.488994	0.0154918	0.0912047	-0.010563	0.0493109	0.0531418
1.86333	0.181496	0.230962	0.0536197	0.0742925	-0.00423479	0.0822758	0.0842022		1.86333	0.468066	0.485622	0.0213404	0.095936	-0.011947	0.0454019	0.0549068
1.86667	0.179987	0.23201	0.0531975	0.0718291	-0.00139674	0.0803659	0.0843784		1.86667	0.466946	0.484994	0.017388	0.0957459	-0.0100322	0.0469384	0.0540891
1.87	0.18308	0.234608	0.0549935	0.0735708	-0.00818868	0.0819079	0.0849697		1.87	0.471459	0.488064	0.0180412	0.0970425	-0.00872694	0.0466605	0.0546625
1.87333	0.179944	0.231026	0.0533416	0.074715	-0.00639564	0.0787204	0.0866245		1.87333	0.471889	0.484569	0.019853	0.095273	-0.0125536	0.0510829	0.0499701
1.87667	0.185019	0.231047	0.0571593	0.0717694	0.00224907	0.0789315	0.0806803		1.87667	0.466819	0.485881	0.0147157	0.0916234	-0.00829983	0.0514018	0.0561969
1.88	0.180971	0.230234	0.0530416	0.0766602	-0.0043669	0.0834987	0.0821519		1.88	0.467422	0.487914	0.0152008	0.100724	-0.0142953	0.0467591	0.0541158
1.88333	0.182933	0.235383	0.0542077	0.0779131	-0.00254113	0.0794587	0.079519		1.88333	0.470809	0.488008	0.0166063	0.098102	-0.0090115	0.0470497	0.0555012
1.88667	0.182266	0.2366	0.0489257	0.0739353	-0.0073269	0.0812633	0.0845881		1.88667	0.471781	0.488988	0.0170887	0.0948714	-0.0073198	0.0463746	0.0560958
1.89	0.183537	0.229949	0.0565659	0.0746217	0.0009218	0.085414	0.0847964		1.89	0.470745	0.491063	0.0148259	0.0918271	-0.0129627	0.0491141	0.0540965
1.89333	0.182717	0.233488	0.0552555	0.0747258	-0.00144854	0.081866	0.0849845		1.89333	0.46815	0.493595	0.0227631	0.0937413	-0.00970273	0.0491203	0.0539773
1.89667	0.180639	0.234988	0.0536259	0.0708591	-0.00307996	0.078841	0.0847539		1.89667	0.471408	0.497416	0.0154287	0.0970049	-0.00625797	0.0481888	0.0552921
1.9	0.186579	0.233205	0.0544012	0.0690212	-0.00523332	0.0840874	0.0844358		1.9	0.471543	0.488157	0.015949	0.0953549	-0.0128286	0.0506786	0.0556415
1.90333	0.183388	0.231194	0.0516372	0.0717921	-0.00491028	0.0791828	0.0875638		1.90333	0.471277	0.489738	0.016801	0.0961092	-0.00909709	0.0452809	0.0534995
1.90667	0.18179	0.235468	0.0539662	0.0713176	-0.00388656	0.0788525	0.0877123		1.90667	0.471333	0.492402	0.0164011	0.0878853	-0.00874719	0.0464155	0.0529288
1.91	0.175898	0.236017	0.051396	0.0723867	-0.00357913	0.0787736	0.0832121		1.91	0.471555	0.491221	0.0135587	0.0946786	-0.0105932	0.0515445	0.05459
1.91333	0.18299	0.234115	0.0519424	0.0711502	-0.00739658	0.0830946	0.0857359		1.91333	0.469511	0.4918	0.0155352	0.090571	-0.0149142	0.0523323	0.0564292
1.91667	0.182978	0.230234	0.0476603	0.0736278	-0.00354853	0.0797107	0.0881931		1.91667	0.473978	0.488751	0.0140349	0.0934391	-0.011341	0.0494192	0.0526483
1.92	0.187068	0.233288	0.0534752	0.076843	-0.00839424	0.0825642	0.0820493		1.92	0.47435	0.49463	0.0148725	0.0946093	-0.00994421	0.0523344	0.0565071
1.92333	0.185395	0.229601	0.0516774	0.0734648	-0.00547613	0.081285	0.0847144		1.92333	0.472668	0.493548	0.0164702	0.0922852	-0.00865132	0.0470761	0.0575941
1.92667	0.184176	0.235766	0.0499807	0.0744517	-0.00265796	0.0811893	0.0866163		1.92667	0.475433	0.491127	0.0167807	0.0949249	-0.0149639	0.0454785	0.0605247
1.93	0.181076	0.234449	0.0554113	0.0725397	-0.00576808	0.0791996	0.0868777		1.93	0.471214	0.495154	0.0172927	0.0901069	-0.0125406	0.0496602	0.0557747
1.93333	0.183719	0.233721	0.0489611	0.0752555	-0.00307603	0.084049	0.0868626		1.93333	0.471959	0.494444	0.0103454	0.0937584	-0.0125399	0.0488219	0.0578113
1.93667	0.180694	0.230917	0.0483613	0.0716534	-0.00221666	0.0877838	0.0864066		1.93667	0.475859	0.495205	0.0165628	0.100251	-0.00951246	0.04513	0.0583406
1.94	0.185459	0.235309	0.0538335	0.0724961	-0.00390701	0.086843	0.0850189		1.94	0.4761	0.494444	0.0150966	0.0915559	-0.0156332	0.0488675	0.0526479
1.94333	0.181312	0.234038	0.0500968	0.0733586	-0.00606266	0.0825771	0.0833533		1.94333	0.473898	0.490348	0.0173173	0.0947511	-0.00813383	0.050295	0.0624355
1.94667	0.186325	0.236084	0.0512613	0.0768522	-0.00652753	0.0842326	0.0844394		1.94667	0.476629	0.496635	0.0136964	0.0912456	-0.00961094	0.0531826	0.0603043
1.95	0.178967	0.233248	0.0572219	0.0703582	-0.00484298	0.0836057	0.0861407		1.95	0.47716	0.497125	0.0175756	0.0953776	-0.0132098	0.052737	0.0578053
1.95333	0.185217	0.233403	0.0518443	0.0735825	-0.00316862	0.0872567	0.0876944		1.95333	0.475435	0.493374	0.00929311	0.0978823	-0.00891631	0.0486509	0.0583242
1.95667	0.190815	0.237683	0.0518347	0.0697864	-0.00561681	0.0807525	0.0888608		1.95667	0.477219	0.493254	0.0123585	0.097491	-0.00974854	0.0494492	0.0541738
1.96	0.180842	0.231642	0.0550524	0.072678	-0.00222807	0.0837017	0.0838303		1.96	0.472413	0.494177	0.0117466	0.088773	-0.00846706	0.047358	0.063016
1.96333	0.187489	0.236947	0.0498422	0.0717787	-0.00522293	0.0787258	0.0866972		1.96333	0.480407	0.49226	0.0140443	0.0980355	-0.00856648	0.0482052	0.0575806
1.96667	0.186151	0.236421	0.0544859	0.0704716	7.886e-05	0.0790593	0.0891496		1.96667	0.479906	0.493186	0.0116944	0.0918495	-0.0130711	0.0478279	0.0579496
1.97	0.182528	0.23523	0.0529352	0.0731792	-0.0032251	0.0829227	0.0819695		1.97	0.473809	0.495903	0.0145974	0.0974377	-0.013968	0.0497684	0.0548018
1.97333	0.183012	0.238269	0.0514573	0.0700084	-0.00340367	0.0838311	0.0861192		1.97333	0.474204	0.492756	0.0145193	0.0986777	-0.00935586	0.0531038	0.0545472
1.97667	0.186051	0.23432	0.0487407	0.0699868	-0.00144067	0.0842607	0.0863349		1.97667	0.477902	0.495898	0.0117634	0.0961422	-0.00633184	0.0535979	0.0588595
1.98	0.184762	0.234874	0.0507567	0.0736255	-0.00072717	0.0825156	0.0891517		1.98	0.477985	0.499745	0.0170744	0.0946225	-0.00759902	0.0512878	0.0571963
1.98333	0.183778	0.232425	0.051344	0.0713325	-0.00596122	0.0851272	0.084056		1.98333	0.477285	0.497715	0.0135522	0.0936241	-0.0125775	0.0493521	0.0580702
1.98667	0.183552	0.237175	0.051246	0.0726844	-8.589e-05	0.0833805	0.0875892		1.98667	0.478228	0.49515	0.00938575	0.0920787	-0.00889572	0.051339	0.0546557
1.99	0.183635	0.234299	0.0517181	0.0691735	-0.00700111	0.085555	0.0863349		1.99	0.479805	0.496672	0.0127289	0.0919885	-0.0141166	0.0549585	0.0589088
1.99333	0.18403	0.233001	0.0526984	0.0719825	-0.00474419	0.0850973	0.0895574		1.99333	0.476848	0.501708	0.0124461	0.0908782	-0.0148645	0.0468622	0.0577111
1.99667	0.186664	0.235821	0.0471275	0.0747634	-0.00373871	0.085835	0.087306		1.99667	0.475006	0.498659	0.0115242	0.0934299	-0.0126359	0.0499017	0.0634161
2	0.185124	0.235249	0.0511558	0.0707106	-0.00212981	0.0845706	0.086221		2	0.477224	0.502789	0.0118682	0.0941698	-0.0137934	0.0497708	0.0555377
2.00333	0.18276	0.229303	0.0493829	0.0728916	-0.00338695	0.0860592	0.090601		2.00333	0.481137	0.494688	0.0139681	0.0938568	-0.0131988	0.0537752	0.0629577
2.00667	0.178724	0.234801	0.049463	0.0694539	-0.0027171	0.0856507	0.089426		2.00667	0.479389	0.501143	0.0136311	0.0883576	-0.00976103	0.0524134	0.0591183
2.01	0.181729	0.235482	0.0520712	0.0695201	-0.00333824	0.0844249	0.0870862		2.01	0.48108	0.497933	0.0161307	0.0924701	-0.0142321	0.0475001	0.0607686
2.01333	0.18234	0.234001	0.0528511	0.0713988	-0.00332781	0.0816206	0.0882935		2.01333	0.477093	0.501771	0.0122955	0.0957146	-0.0111993	0.0524967	0.0583637
2.01667	0.18706	0.238629	0.0494202	0.0728059	-0.00328091	0.0803332	0.0937005		2.01667	0.479942	0.499661	0.0129044	0.0941094	-0.00858028	0.04935	0.0594042
2.02	0.188964	0.234635	0.0481589	0.0738086	-0.00731228	0.0894478	0.0897918		2.02	0.479509	0.497464	0.0124039	0.0915544	-0.0117666	0.0530886	0.0583479
2.02333	0.185045	0.232392	0.0548733	0.0718516	-0.00448359	0.0860284	0.092789		2.02333	0.479359	0.499145	0.012787	0.0952992	-0.00971009	0.0505811	0.05746
2.02667	0.182064	0.231603	0.0506762	0.0725574	-0.00912476	0.0845095	0.0881037		2.02667	0.481239	0.498824	0.0172196	0.0921652	-0.0139372	0.0503743	0.0597405
2.03	0.18459	0.238856	0.05159	0.0720947	-0.0030829	0.0835636	0.093657		2.03	0.483207	0.498373	0.0142466	0.0930268	-0.00713006	0.0474311	0.0616797
2.03333	0.18678	0.235202	0.0515064	0.0740811	-0.00340441	0.0877728	0.0879538		2.03333	0.480395	0.502337	0.00830665	0.0926915	-0.0175401	0.0503929	0.0605188
2.03667	0.182326	0.236327	0.0546258	0.0707569	-0.00418196	0.0836192	0.0923255		2.03667	0.483043	0.496988	0.00810442	0.0916071	-0.00484611	0.053487	0.0586032
2.04	0.18344	0.232244	0.0546038	0.0728644	-0.00618198	0.0876976	0.0885273		2.04	0.48241	0.503023	0.0121395	0.0889617	-0.0147125	0.049389	0.0623646
2.04333	0.185088	0.235822	0.0523195	0.0745813	-0.00072359	0.0875319	0.08892		2.04333	0.478487	0.500319	0.0131509	0.0943594	-0.0128503	0.0564106	0.0610399
2.04667	0.186668	0.236619	0.0505978	0.0750712	-0.00831721	0.0847961	0.0894624		2.04667	0.483108	0.501326	0.0104305	0.0938025	-0.00926302	0.0547206	0.0621398
2.05	0.184736	0.238419	0.0499664	0.0723513	-0.00400442	0.0879465	0.0866768		2.05	0.488046	0.501042	0.00952177	0.0958106	-0.0105335	0.0537969	0.0661984
2.05333	0.183672	0.235231	0.0535505	0.0737151	-0.00294277	0.0876949	0.0922077		2.05333	0.484365	0.500712	0.00863674	0.0895823	-0.011502	0.0508395	0.0606961
2.05667	0.181861	0.235089	0.0527833	0.0740073	-0.00163225	0.0836683	0.0871585		2.05667	0.48136	0.500909	0.0140703	0.0917387	-0.00652161	0.0497042	0.0604043
2.06	0.184322	0.238052	0.0520574	0.0730299	-0.00681085	0.0908942	0.0907151		2.06	0.48151	0.501545	0.0128196	0.088734	-0.0145838	0.0523153	0.0574109
2.06333	0.180895	0.236142	0.0549717	0.070267	-0.0012684	0.087874	0.0874571		2.06333	0.482685	0.501611	0.00784889	0.0943362	-0.00907214	0.0520081	0.0604429
2.06667	0.185498	0.23607	0.0504394	0.0711026	3.356e-05	0.0881557	0.0932447		2.06667	0.479505	0.504039	0.00914066	0.0894199	-0.0122921	0.0493604	0.067183
2.07	0.18669	0.234802	0.0512442	0.0712891	-0.00377869	0.0879721	0.0868354		2.07	0.485226	0.500779	0.0131822	0.0907983	-0.0167931	0.0536396	0.0591335
2.07333	0.183006	0.237721	0.0496446	0.0696004	-0.00224801	0.0849982	0.0873594		2.07333	0.486132	0.500635	0.00970699	0.0902584	-0.0132543	0.0538285	0.0584599
2.07667	0.185914	0.239919	0.0488305	0.0733681	-0.00271504	0.0870145	0.0888295		2.07667	0.482366	0.504035	0.00978068	0.0935127	-0.0121368	0.0498072	0.0613613
2.08	0.186979	0.230009	0.0519303	0.0724166	-0.00368432	0.0871609	0.0851173		2.08	0.482386	0.501798	0.00909073	0.0920738	-0.0124654	0.055597	0.0604368
2.08333	0.184401	0.237672	0.0524661	0.0738162	-0.00393833	0.0869148	0.0866518		2.08333	0.482539	0.506713	0.0170324	0.0920167	-0.0143329	0.0518592	0.0640618
2.08667	0.182805	0.242091	0.054106	0.0708928	-0.00353261	0.0912824	0.089148		2.08667	0.481647	0.498991	0.0113111	0.0907641	-0.00784228	0.0558399	0.0588922
2.09	0.182353	0.23775	0.050342	0.0746749	-0.00479065	0.0885891	0.0912699		2.09	0.483448	0.502196	0.0130326	0.0916284	-0.0119761	0.0563135	0.0636567
2.09333	0.184916	0.233967	0.0480309	0.0727565	-0.00256394	0.0866086	0.0927995		2.09333	0.482614	0.500112	0.00918935	0.0914314	-0.0175126	0.055659	0.0606641
2.09667	0.186433	0.233918	0.0505887	0.0731153	-0.00119672	0.0878515	0.0882817		2.09667	0.48158	0.501475	0.0115428	0.0935492	-0.0128383	0.0536794	0.0616896
2.1	0.184419	0.236402	0.0473611	0.0742779	-0.00538409	0.0870532	0.0889802		2.1	0.483353	0.499148	0.0102448	0.0921166	-0.0120897	0.0520347	0.0608978
2.10333	0.186383	0.233029	0.0509141	0.0760167	-0.00127272	0.0874109	0.0926098		2.10333	0.485034	0.507233	0.0127368	0.0899494	-0.0093019	0.0509456	0.0630381
2.10667	0.182205	0.233133	0.0557709	0.0658803	-0.00860045	0.0893694	0.0898675		2.10667	0.485304	0.501758	0.0107037	0.0887195	-0.012365	0.0524751	0.063399
2.11	0.185254	0.235847	0.0509242	0.0741787	-0.00710688	0.0891677	0.0902978		2.11	0.478019	0.502542	0.00501296	0.0915111	-0.0174788	0.0564545	0.0649223
2.11333	0.187861	0.240611	0.0553763	0.0727744	-0.00449713	0.0864711	0.0950233		2.11333	0.489382	0.505677	0.011103	0.0926239	-0.0138351	0.0553907	0.0614331
2.11667	0.184301	0.235711	0.0484438	0.0721789	-0.00678017	0.0900209	0.0903953		2.11667	0.488806	0.500985	0.00781387	0.0909125	-0.00768481	0.0520226	0.0642691
2.12	0.184575	0.238773	0.0525893	0.0715788	-0.00500109	0.0900488	0.0909689		2.12	0.486089	0.502993	0.00887382	0.0915017	-0.0156444	0.048013	0.0630118
2.12333	0.187454	0.240793	0.0513294	0.074704	-0.00470525	0.0901324	0.0910903		2.12333	0.486541	0.507042	0.00886086	0.0898923	-0.0111868	0.0495272	0.0608246
2.12667	0.184811	0.234417	0.0504856	0.0703301	-0.00571977	0.0900637	0.0938153		2.12667	0.484458	0.50839	0.0123623	0.0917488	-0.012946	0.0545614	0.0632783
2.13	0.185469	0.236621	0.0462305	0.0715316	-0.00372691	0.0908624	0.0922616		2.13	0.487803	0.505184	0.00737263	0.0889198	-0.0161799	0.0517599	0.064463
2.13333	0.187374	0.236628	0.0533294	0.0761606	-0.00669891	0.0939633	0.0937957		2.13333	0.486083	0.509419	0.00850465	0.0941569	-0.0131713	0.0529018	0.0614502
2.13667	0.182417	0.237043	0.0470386	0.0725488	-0.00346081	0.0901072	0.0892649		2.13667	0.486231	0.503719	0.006343	0.0922167	-0.00800237	0.0536452	0.0624782
2.14	0.184145	0.236911	0.0518118	0.070985	-0.00873986	0.0916736	0.090303		2.14	0.486246	0.508912	0.0115919	0.0864211	-0.0123371	0.0554581	0.0634094
2.14333	0.186505	0.240327	0.0529798	0.0725834	-0.00393165	0.0915569	0.0874797		2.14333	0.489245	0.508269	0.00809429	0.0880387	-0.0144596	0.0563633	0.0610235
2.14667	0.188676	0.236156	0.0482483	0.0757819	-0.00502205	0.0908562	0.091923		2.14667	0.487057	0.505909	0.00735074	0.0902838	-0.0102562	0.0532883	0.0607483
2.15	0.184597	0.240859	0.0561856	0.0689216	-0.00325206	0.0860856	0.0910366		2.15	0.483115	0.505191	0.00783231	0.0927113	-0.00961907	0.0563158	0.0605008
2.15333	0.185692	0.238738	0.0493145	0.0742678	-0.00609872	0.0921806	0.0901821		2.15333	0.487591	0.51078	0.0078783	0.0906579	-0.0125951	0.0544475	0.0607047
2.15667	0.186634	0.238978	0.0480168	0.0710473	-0.00359952	0.0916821	0.0884875		2.15667	0.489099	0.505464	0.0095045	0.0895252	-0.0128559	0.052469	0.0656628
2.16	0.184747	0.234728	0.0524139	0.0724739	-0.00057927	0.0903208	0.0960693		2.16	0.490769	0.506793	0.0114126	0.0942554	-0.0131794	0.0545078	0.0609719
2.16333	0.183816	0.234748	0.049462	0.0768383	-0.00312799	0.0901924	0.0928442		2.16333	0.488245	0.508002	0.00942796	0.0892188	-0.0117848	0.0514014	0.0620766
2.16667	0.186476	0.23908	0.0528346	0.0748566	-0.00639148	0.0892716	0.0913344		2.16667	0.485641	0.504522	0.0105014	0.0921631	-0.010215	0.054556	0.0657014
2.17	0.191745	0.237818	0.0492588	0.075273	-0.00039792	0.0874837	0.0917054		2.17	0.487916	0.504887	0.0100347	0.0885827	-0.00997671	0.0525588	0.0637413
2.17333	0.18828	0.241418	0.0518637	0.0719701	-0.0035116	0.0972951	0.0947846		2.17333	0.485016	0.50398	0.00633809	0.0910925	-0.0146535	0.0584537	0.0697616
2.17667	0.186236	0.237869	0.0503308	0.0747971	-0.00371702	0.0908812	0.0916384		2.17667	0.491558	0.508092	0.00495497	0.0895072	-0.0149499	0.0539125	0.0634078
2.18	0.186342	0.241266	0.0504369	0.0743648	-0.00250776	0.086217	0.0987422		2.18	0.490998	0.512075	0.00593344	0.0893736	-0.0109712	0.0554137	0.0584626
2.18333	0.187707	0.238558	0.0525219	0.0745093	-0.00301309	0.0906655	0.0905206		2.18333	0.488256	0.505412	0.0124053	0.0881988	-0.010276	0.0531373	0.0625382
2.18667	0.188384	0.238245	0.0545486	0.0727707	-0.0077629	0.0957176	0.0907426		2.18667	0.49103	0.504091	0.00906315	0.0885845	-0.014824	0.0521561	0.0641142
2.19	0.186827	0.23454	0.0538882	0.0740834	-0.00327893	0.0921293	0.0979701		2.19	0.493163	0.50864	0.00870642	0.0895762	-0.00632146	0.0554726	0.0616499
2.19333	0.187506	0.238594	0.0552996	0.0713811	-0.00368756	0.0939434	0.0951832		2.19333	0.4875	0.508713	0.00366835	0.0899518	-0.0126198	0.052291	0.0637917
2.19667	0.18581	0.238015	0.0515421	0.0755623	-0.00379363	0.0913073	0.0946445		2.19667	0.488855	0.509359	0.00857846	0.0873533	-0.015019	0.0539085	0.0607046
2.2	0.183815	0.236419	0.0539581	0.0697197	-0.00572624	0.0911787	0.0971969		2.2	0.492694	0.506207	0.00835457	0.0875201	-0.0134865	0.05597	0.0632721
2.20333	0.181864	0.237765	0.0523418	0.0718522	-0.00416499	0.0900804	0.0982265		2.20333	0.488314	0.505627	0.00485625	0.0884232	-0.0154707	0.0541599	0.064945
2.20667	0.185366	0.23418	0.0512379	0.0732361	-0.0077796	0.0898113	0.0963142		2.20667	0.48673	0.510626	0.0172846	0.0911745	-0.00885278	0.0513861	0.0629584
2.21	0.184661	0.237803	0.0480678	0.0726325	-0.0032581	0.0939007	0.0906907		2.21	0.492918	0.50482	0.00649689	0.0909904	-0.01315	0.0516462	0.0670364
2.21333	0.188896	0.236244	0.0553988	0.0739273	-0.00346993	0.0894581	0.0916831		2.21333	0.491934	0.509751	0.00430707	0.0928371	-0.0168345	0.0565485	0.068896
2.21667	0.179879	0.239712	0.0505976	0.0757732	-0.00370206	0.0958171	0.0921582		2.21667	0.490414	0.514553	0.00044595	0.0892896	-0.0110974	0.0570269	0.067902
2.22	0.187164	0.238755	0.0493503	0.0738046	-0.00673906	0.0922613	0.0947892		2.22	0.490042	0.509406	0.00373039	0.0908978	-0.0106251	0.0571928	0.066966
2.22333	0.187611	0.240028	0.0498124	0.0700957	-0.00460921	0.0901615	0.0929377		2.22333	0.494991	0.510273	0.0066466	0.0879781	-0.0128795	0.054777	0.0639447
2.22667	0.186906	0.242551	0.0493803	0.0755054	-0.00515098	0.0971952	0.093839		2.22667	0.490771	0.504725	0.00194845	0.0899369	-0.0117854	0.0558138	0.0656037
2.23	0.183641	0.238857	0.0485353	0.0708547	-0.010415	0.0905168	0.0946383		2.23	0.49225	0.5076	0.00471946	0.0879803	-0.0111055	0.0556716	0.0706481
2.23333	0.18745	0.240594	0.0486089	0.0742512	-0.00478249	0.0911235	0.0951521		2.23333	0.492619	0.502205	0.00302909	0.0889879	-0.0127774	0.055017	0.0625061
2.23667	0.187012	0.240601	0.0475921	0.07681	-0.00605875	0.0945991	0.0963447		2.23667	0.491991	0.511279	0.0028368	0.0879701	-0.00842638	0.0552422	0.0659927
2.24	0.182798	0.237626	0.0510984	0.0710586	-0.00125672	0.0928484	0.097997		2.24	0.489054	0.514217	0.00493551	0.0923719	-0.0110426	0.0544656	0.0643713
2.24333	0.188352	0.236931	0.051132	0.0705443	-0.00621975	0.0965213	0.0972539		2.24333	0.495943	0.511268	0.00577411	0.0891877	-0.00963992	0.0523574	0.0624807
2.24667	0.189347	0.238946	0.0491247	0.0751639	-0.00339017	0.0965777	0.095015		2.24667	0.490113	0.505127	0.00303384	0.0885419	-0.0135555	0.0564286	0.0655615
2.25	0.18612	0.238961	0.0480996	0.0709525	-0.00537094	0.0906729	0.0943811		2.25	0.486775	0.511057	0.00500858	0.0893352	-0.012621	0.0556926	0.0655203
2.25333	0.180673	0.237572	0.054983	0.0745767	-0.00306547	0.0885753	0.0903034		2.25333	0.490815	0.510499	0.00593657	0.0841954	-0.0134078	0.0574098	0.0642657
2.25667	0.184383	0.240448	0.0492944	0.0709377	-0.00641072	0.0949429	0.0959647		2.25667	0.491813	0.509318	0.00334465	0.0868657	-0.0137367	0.0529058	0.0673846
2.26	0.187847	0.238677	0.0526435	0.0733469	-0.00335737	0.091991	0.0944097		2.26	0.491079	0.509506	0.00618894	0.0852923	-0.0107281	0.0559452	0.0672725
2.26333	0.184662	0.237771	0.0531274	0.074524	-0.00466602	0.0948112	0.0942338		2.26333	0.494802	0.507727	0.00523751	0.0905235	-0.013534	0.0577137	0.0677218
2.26667	0.186249	0.238823	0.0477243	0.0724873	-0.0042182	0.0930687	0.0879868		2.26667	0.48883	0.511398	0.00708788	0.0859007	-0.0143685	0.0566892	0.070134
2.27	0.187168	0.240376	0.0528853	0.0698536	-0.00260031	0.0976237	0.0981609		2.27	0.49277	0.509115	0.00498063	0.0873746	-0.0142664	0.0562547	0.0663566
2.27333	0.186513	0.241775	0.0481876	0.069899	-0.00360166	0.097183	0.0951611		2.27333	0.492388	0.51436	0.0041741	0.0864796	-0.0135341	0.060815	0.0681225
2.27667	0.18793	0.242385	0.0488793	0.070457	-0.00330171	0.0940189	0.0974032		2.27667	0.493002	0.510182	0.00223716	0.0898425	-0.0123024	0.0550745	0.0701888
2.28	0.185873	0.242147	0.050127	0.0733036	-0.00750258	0.0939389	0.0916612		2.28	0.489167	0.508454	-0.00095268	0.0870799	-0.0135337	0.0591782	0.0661815
2.28333	0.186076	0.243954	0.0466131	0.0722655	-0.00532371	0.0934344	0.0951672		2.28333	0.489081	0.508405	0.00519957	0.0884456	-0.0155193	0.0543599	0.066252
2.28667	0.184528	0.241075	0.0518307	0.0745862	-0.00329506	0.0956792	0.0968576		2.28667	0.493642	0.508162	0.00263073	0.0889065	-0.0132652	0.0584481	0.0698507
2.29	0.188354	0.240586	0.0513872	0.0736696	-0.00610583	0.0966707	0.0946217		2.29	0.492945	0.508605	0.00587554	0.0866543	-0.0108953	0.0605106	0.0658019
2.29333	0.186971	0.236621	0.0508468	0.0742873	-0.00889527	0.0940709	0.0993911		2.29333	0.488404	0.509637	0.00561541	0.0888263	-0.0149945	0.0587764	0.0655896
2.29667	0.186038	0.241782	0.0542654	0.0763246	-0.00584974	0.0957208	0.096715		2.29667	0.494933	0.512804	0.00233927	0.0926189	-0.0121719	0.0590029	0.0645667
2.3	0.184852	0.237952	0.0532429	0.0728916	-0.00732234	0.0988396	0.0962425		2.3	0.492	0.511288	0.00225868	0.0841351	-0.0144147	0.0565656	0.0688838
2.30333	0.186198	0.239572	0.0515392	0.072404	-0.00408192	0.0925622	0.0938665		2.30333	0.489547	0.516614	0.00358824	0.0881632	-0.0101946	0.0582918	0.0636451
2.30667	0.190711	0.243257	0.0490243	0.0704175	-0.00595686	0.0983201	0.0965122		2.30667	0.495768	0.511151	0.00672187	0.0892544	-0.0146711	0.0600608	0.0676366
2.31	0.187372	0.239154	0.0484451	0.0734474	-0.00249025	0.0959243	0.0981318		2.31	0.491849	0.512852	-0.00049012	0.0927389	-0.0118176	0.055957	0.066632
2.31333	0.191511	0.239859	0.0502505	0.0703069	-0.00853532	0.0995207	0.0966362		2.31333	0.492888	0.508868	0.00489795	0.0900026	-0.0126273	0.0567773	0.0649229
2.31667	0.187133	0.241166	0.0517286	0.0786281	-0.0053029	0.0975444	0.0967273		2.31667	0.495326	0.512397	0.00413879	0.0892319	-0.0119516	0.051935	0.0643943
2.32	0.186852	0.233905	0.0512837	0.071969	-0.0025413	0.0976849	0.0979189		2.32	0.490883	0.510812	0.00747282	0.08575	-0.00824298	0.0566647	0.067541
2.32333	0.187619	0.238595	0.0498454	0.0732373	-0.00204106	0.0953606	0.10123		2.32333	0.496195	0.512759	0.00262685	0.0885795	-0.0126461	0.0578993	0.0675439
2.32667	0.1898	0.242359	0.0544722	0.0767378	-0.00438421	0.0952526	0.0940378		2.32667	0.492313	0.513333	0.00487369	0.0894452	-0.011899	0.0609699	0.067005
2.33	0.189695	0.235924	0.0526483	0.0747276	-0.00930569	0.093012	0.0960994		2.33	0.49361	0.512024	-0.00034173	0.0860538	-0.0112267	0.0568339	0.0678256
2.33333	0.186532	0.240674	0.050187	0.0732207	-0.00690652	0.0956436	0.100361		2.33333	0.495522	0.513503	0.00135925	0.0918212	-0.0121404	0.0580176	0.0654486
2.33667	0.186624	0.239452	0.0492405	0.0703306	-0.00323328	0.0969262	0.0945236		2.33667	0.499532	0.513435	0.00371608	0.0886223	-0.0127543	0.0570082	0.0706606
2.34	0.188351	0.241972	0.0513406	0.0675924	-0.0020757	0.0998977	0.0971332		2.34	0.496701	0.511457	0.00083119	0.0821606	-0.0128053	0.0571054	0.0720857
2.34333	0.188136	0.243415	0.0499358	0.0710228	-0.00881558	0.0992955	0.0990604		2.34333	0.497217	0.509608	-0.00231246	0.0897582	-0.0146131	0.0555975	0.0694993
2.34667	0.185682	0.241911	0.0511212	0.0731027	-0.0011244	0.0932551	0.0939647		2.34667	0.494687	0.508981	0.00203704	0.0858096	-0.00973343	0.055854	0.064408
2.35	0.187683	0.242254	0.0512197	0.0740824	-0.00258244	0.0961511	0.0954867		2.35	0.494128	0.518083	0.00260207	0.0876127	-0.0123255	0.0554642	0.0726103
2.35333	0.189312	0.242245	0.0476656	0.0762288	-0.00585896	0.0973301	0.0941175		2.35333	0.491755	0.51548	0.00322298	0.0853623	-0.0140599	0.0579044	0.0663504
2.35667	0.192783	0.241023	0.0509105	0.071328	-0.0067017	0.0949713	0.0967776		2.35667	0.49253	0.512605	7.834e-05	0.0855494	-0.0144321	0.0570305	0.0684604
2.36	0.18393	0.239854	0.0526921	0.0705545	-0.00759849	0.0966998	0.0954743		2.36	0.493967	0.511183	-0.00334219	0.0875672	-0.0108047	0.0566321	0.0646026
2.36333	0.188337	0.239671	0.0516621	0.0725134	-0.00604194	0.093248	0.0932392		2.36333	0.493879	0.512504	-0.00107726	0.0874537	-0.0145097	0.0580053	0.0712119
2.36667	0.188108	0.239376	0.0494261	0.0734704	-0.00837835	0.0959316	0.0928009		2.36667	0.495766	0.515023	0.00080714	0.0868361	-0.0148635	0.063885	0.0695151
2.37	0.185955	0.242459	0.0474714	0.072007	-0.00743575	0.0986541	0.0921828		2.37	0.496873	0.517579	-0.000825	0.0877248	-0.014787	0.0576924	0.0685221
2.37333	0.189368	0.239492	0.0538607	0.0697938	-0.00611522	0.0976206	0.100085		2.37333	0.496943	0.518319	-0.00272074	0.0846029	-0.0155948	0.0607931	0.0676259
2.37667	0.185307	0.242596	0.050155	0.0717312	-0.00342935	0.0970089	0.0996714		2.37667	0.496751	0.511236	0.00033242	0.0824497	-0.0143859	0.0599925	0.0709508
2.38	0.189918	0.23805	0.0515013	0.075257	-0.00296672	0.0944373	0.0940378		2.38	0.496974	0.516441	0.00243345	0.0868776	-0.0143542	0.060375	0.0667591
2.38333	0.185477	0.23933	0.0520525	0.0750882	-0.00463999	0.0971983	0.0960145		2.38333	0.498336	0.512533	0.00419222	0.0852907	-0.0129814	0.0591711	0.0672962
2.38667	0.18656	0.241794	0.0543071	0.0715571	-0.00525951	0.100567	0.0962629		2.38667	0.496364	0.517666	-0.0003986	0.0883499	-0.0124622	0.060258	0.0699417
2.39	0.186475	0.237294	0.0545835	0.0742674	-0.00444801	0.0971245	0.0948971		2.39	0.499544	0.514073	0.00196751	0.0812996	-0.0108281	0.056088	0.0651137
2.39333	0.185613	0.24077	0.0496112	0.0748107	-0.00440975	0.0992248	0.0970916		2.39333	0.496132	0.516711	0.00072272	0.0837881	-0.0135984	0.0577392	0.0674496
2.39667	0.185387	0.242737	0.0559492	0.0738696	-0.00443082	0.0976169	0.0964852		2.39667	0.493402	0.517414	0.00221552	0.0844897	-0.0141665	0.0563457	0.0679199
2.4	0.185199	0.243516	0.0554752	0.0758489	-0.00458639	0.0971044	0.095627		2.4	0.500724	0.515394	0.00064685	0.0856465	-0.0141178	0.0593122	0.0681645
2.40333	0.190363	0.244377	0.0523892	0.0706168	-0.00435045	0.102576	0.0979698		2.40333	0.495667	0.5102	0.00210231	0.0866427	-0.0155593	0.0611259	0.0696846
2.40667	0.187216	0.242982	0.0525796	0.0738603	-0.00451245	0.10282	0.0960774		2.40667	0.4953	0.513004	0.00015576	0.0833573	-0.0151983	0.058271	0.0702883
2.41	0.188512	0.241147	0.0481909	0.0714917	-0.00317156	0.0999588	0.0974633		2.41	0.492891	0.513106	-0.00019426	0.085688	-0.0157132	0.0583976	0.0698725
2.41333	0.191592	0.240323	0.0535038	0.0728059	-0.00721993	0.0963407	0.101874		2.41333	0.495466	0.51479	-0.00373421	0.0860383	-0.0150225	0.0613101	0.0699812
2.41667	0.183206	0.24231	0.0521568	0.0720655	-0.00374446	0.0998577	0.0989267		2.41667	0.493023	0.511964	-0.00663554	0.0830274	-0.014776	0.0605694	0.0704448
2.42	0.186969	0.244864	0.0494711	0.0706855	-0.0051521	0.0974971	0.100145		2.42	0.495696	0.515014	0.00084212	0.0888897	-0.014043	0.0587198	0.0726756
2.42333	0.187781	0.241171	0.0515881	0.0720482	-0.00481922	0.0990779	0.102544		2.42333	0.498459	0.513024	-0.00360543	0.0809681	-0.0143929	0.0579864	0.069214
2.42667	0.191394	0.24668	0.0538819	0.0756677	-0.00877546	0.0989773	0.0989517		2.42667	0.487284	0.515193	4.332e-05	0.0807699	-0.011714	0.0578326	0.0722682
2.43	0.189107	0.243733	0.0564134	0.0697224	-0.00505367	0.0997989	0.101488		2.43	0.498241	0.513938	-0.00167277	0.0814633	-0.0132681	0.0623564	0.0711937
2.43333	0.191718	0.238133	0.0511472	0.0716609	-0.00531169	0.099618	0.0978231		2.43333	0.493413	0.514068	-0.00341703	0.0860155	-0.0158006	0.0625191	0.070358
2.43667	0.190191	0.24045	0.0522016	0.0688151	-0.00322266	0.101794	0.0988659		2.43667	0.492584	0.509777	-0.00194365	0.0786368	-0.0160627	0.0618321	0.0666653
2.44	0.184093	0.234886	0.0483579	0.072953	-0.00466503	0.100514	0.0999994		2.44	0.501229	0.514721	-0.00127992	0.0845257	-0.0113948	0.0578497	0.0718722
2.44333	0.18526	0.241645	0.0490648	0.0709375	-0.00869637	0.102888	0.0969972		2.44333	0.494018	0.512295	-0.00106114	0.0837799	-0.0149257	0.0628866	0.0660198
2.44667	0.187878	0.241251	0.0551551	0.0748332	-0.00390785	0.103931	0.101982		2.44667	0.500158	0.510177	-0.00418143	0.088783	-0.0116893	0.0576881	0.0760162
2.45	0.187192	0.240239	0.0491309	0.0723191	-0.00755177	0.0970385	0.102833		2.45	0.49591	0.512784	-0.00504786	0.0910318	-0.0169789	0.0610366	0.0699359
2.45333	0.187438	0.238867	0.0494515	0.0726381	-0.00724331	0.0993227	0.0954272		2.45333	0.498839	0.514105	-0.00222155	0.0802799	-0.0126888	0.0613829	0.0682538
2.45667	0.188327	0.243519	0.0480217	0.0691743	-0.0086712	0.100642	0.0987591		2.45667	0.49977	0.514048	-0.00167165	0.0881066	-0.0187942	0.0588068	0.071589
2.46	0.188688	0.242831	0.0516665	0.0729317	-0.00275998	0.100261	0.102939		2.46	0.496182	0.512192	-0.00129093	0.0836092	-0.0154158	0.0617287	0.0746489
2.46333	0.187669	0.247428	0.0477115	0.0725921	-0.00901803	0.0996625	0.0922237		2.46333	0.495254	0.515825	-0.00080762	0.0835217	-0.0123074	0.062319	0.0718367
2.46667	0.189736	0.245344	0.051388	0.0718022	-0.00414967	0.0992166	0.0959764		2.46667	0.496833	0.518794	-0.00021046	0.0792338	-0.0162311	0.0598772	0.0679058
2.47	0.188569	0.241344	0.0484645	0.0772276	-0.00330871	0.103658	0.0991323		2.47	0.499568	0.515669	-0.00059124	0.0808684	-0.0117584	0.0568559	0.0700506
2.47333	0.189221	0.243267	0.0500615	0.0726533	-0.00533244	0.0990694	0.0988232		2.47333	0.49839	0.512486	-0.00512391	0.0862898	-0.013516	0.0576736	0.0710765
2.47667	0.188748	0.241436	0.0467378	0.0739603	-0.0013338	0.100797	0.0955523		2.47667	0.498911	0.515567	-0.00388571	0.0846458	-0.0125659	0.0626936	0.0720596
2.48	0.19177	0.242144	0.0494718	0.073326	-0.00692088	0.0989765	0.102721		2.48	0.502108	0.513388	-0.00216308	0.0820079	-0.0159522	0.0627645	0.0704887
2.48333	0.187161	0.240612	0.048116	0.0748215	-0.00719147	0.0983236	0.104421		2.48333	0.49998	0.51901	-1.517e-05	0.0896771	-0.00759108	0.0587083	0.0749652
2.48667	0.185968	0.239571	0.0501887	0.0695976	-0.00866869	0.100932	0.103872		2.48667	0.498723	0.517735	0.002399	0.0852559	-0.00843825	0.0632717	0.0701482
2.49	0.191117	0.243839	0.0534285	0.0693317	-0.00642093	0.10496	0.0977511		2.49	0.496862	0.512928	-0.00441321	0.0814806	-0.0144819	0.0586754	0.070031
2.49333	0.186299	0.241173	0.0520833	0.0730372	-0.00633259	0.103467	0.0978901		2.49333	0.500046	0.517789	-0.00216756	0.0794668	-0.0163504	0.0574652	0.0697544
2.49667	0.188368	0.245424	0.0496864	0.0708204	-0.00966098	0.10282	0.10201		2.49667	0.497247	0.516788	-0.00499801	0.0838934	-0.0154155	0.0652727	0.0674609
2.5	0.18486	0.244933	0.052123	0.0745712	-0.00666731	0.105687	0.0965477		2.5	0.493669	0.51502	-0.00319331	0.0798987	-0.0126508	0.0585822	0.0742524
2.50333	0.188088	0.243265	0.0472514	0.0700388	-0.00777015	0.102177	0.101805		2.50333	0.496915	0.514918	-0.00322203	0.0858194	-0.0185791	0.0629663	0.0724528
2.50667	0.190032	0.246391	0.048465	0.0713545	-0.00406143	0.101705	0.100308		2.50667	0.494351	0.518612	-0.00188743	0.0862256	-0.0173736	0.0625261	0.0718585
2.51	0.187842	0.240947	0.0460412	0.068914	-0.00517831	0.104483	0.100075		2.51	0.495283	0.516073	-0.00177467	0.0834808	-0.0150138	0.0666293	0.0744863
2.51333	0.190299	0.243843	0.0503307	0.0696301	-0.00483743	0.103725	0.10038		2.51333	0.499882	0.521567	-0.00268704	0.082894	-0.0121695	0.0637293	0.0701331
2.51667	0.189052	0.242199	0.0493963	0.0747565	-0.00379331	0.103716	0.103155		2.51667	0.499229	0.516807	-0.00191006	0.0811218	-0.016907	0.0630892	0.0703955
2.52	0.190556	0.246305	0.0510883	0.0674398	-0.00321944	0.105355	0.0999532		2.52	0.498938	0.515149	-0.00737185	0.0827908	-0.0122955	0.0555626	0.0743439
2.52333	0.189602	0.243268	0.0484423	0.0715062	-0.00550536	0.103468	0.10105		2.52333	0.500117	0.516025	-0.00471072	0.080987	-0.0131223	0.0578574	0.074596
2.52667	0.18899	0.238008	0.0456585	0.0722617	-0.00730983	0.103941	0.0980907		2.52667	0.498118	0.520072	-0.00189092	0.0840334	-0.0143384	0.0602849	0.072074
2.53	0.189167	0.245413	0.0505016	0.0700251	-0.0089643	0.10469	0.103968		2.53	0.490401	0.515051	-0.00489476	0.0829094	-0.0136712	0.05767	0.0695628
2.53333	0.188558	0.241827	0.0483729	0.0714261	-0.00436105	0.101634	0.101561		2.53333	0.49415	0.516826	-0.0013834	0.0818972	-0.0136867	0.0651436	0.0711394
2.53667	0.185748	0.245007	0.0481997	0.0725089	-0.00530611	0.104468	0.105013		2.53667	0.495669	0.514852	-0.00243313	0.0836547	-0.015913	0.0610612	0.0709606
2.54	0.187317	0.239008	0.0540366	0.0719296	-0.00436069	0.104064	0.0973373		2.54	0.500304	0.517064	-0.0129451	0.0859341	-0.0115849	0.0622523	0.0712786
2.54333	0.18719	0.244886	0.0487687	0.0736559	-0.00433994	0.1066	0.106117		2.54333	0.500217	0.515507	-0.00060384	0.0851162	-0.008513	0.0652069	0.0750165
2.54667	0.186455	0.24065	0.0507017	0.0694952	-0.00654125	0.105427	0.101383		2.54667	0.4982	0.514748	-0.00514227	0.0776207	-0.0182868	0.0638813	0.0697569
2.55	0.191772	0.241287	0.0491982	0.0752621	-0.00489376	0.10639	0.103294		2.55	0.495205	0.512744	-0.00795696	0.0840275	-0.0151617	0.0575848	0.0754666
2.55333	0.190401	0.239842	0.0495422	0.0717699	-0.00401333	0.10208	0.101616		2.55333	0.499786	0.515528	-0.00514397	0.0817458	-0.0128951	0.0646675	0.075978
2.55667	0.191265	0.243208	0.051846	0.0687947	-0.0103427	0.102972	0.102116		2.55667	0.499502	0.51751	-0.00747837	0.0809771	-0.0136388	0.0638028	0.0737449
2.56	0.190743	0.244185	0.0494376	0.0667712	-0.00188653	0.0999707	0.104959		2.56	0.501452	0.517359	-0.00481416	0.0849407	-0.0136155	0.0661939	0.0776277
2.56333	0.188531	0.244319	0.0487193	0.070601	-0.00710226	0.101463	0.104529		2.56333	0.499113	0.516001	-0.00640749	0.0845357	-0.0102101	0.0606859	0.0712023
2.56667	0.188313	0.240878	0.0519711	0.0703291	-0.00549268	0.104199	0.100347		2.56667	0.504378	0.511854	-0.00194162	0.0830149	-0.0107154	0.0577056	0.0720353
2.57	0.189335	0.243334	0.048741	0.0741499	-0.00628459	0.105055	0.102532		2.57	0.499731	0.51632	-0.00623023	0.0799164	-0.0158462	0.0634657	0.0696925
2.57333	0.188546	0.244427	0.0461344	0.0684026	-0.00634305	0.106272	0.102768		2.57333	0.499697	0.514352	-0.00374443	0.0820896	-0.0121718	0.0598105	0.0744589
2.57667	0.186925	0.243303	0.0491702	0.0741136	-0.00548289	0.103195	0.106313		2.57667	0.501736	0.515637	-0.00118058	0.0829567	-0.0128758	0.0595763	0.0730102
2.58	0.188384	0.243753	0.0506199	0.0695375	-0.00883655	0.101542	0.103079		2.58	0.497583	0.515344	-0.0069636	0.084196	-0.0123983	0.0652602	0.0711843
2.58333	0.190811	0.244532	0.0559079	0.0712175	-0.00530309	0.0993569	0.0983623		2.58333	0.498408	0.519938	-0.00318774	0.0825782	-0.0143908	0.0609849	0.0734581
2.58667	0.191684	0.242375	0.051711	0.0701096	-0.0057589	0.105943	0.1039		2.58667	0.499704	0.518387	-0.00456947	0.0827203	-0.0138752	0.0608689	0.0714358
2.59	0.185879	0.242673	0.049984	0.0728326	-0.00682211	0.105503	0.105809		2.59	0.502889	0.51614	-0.00420812	0.0814865	-0.0191731	0.0623768	0.0760375
2.59333	0.188506	0.242357	0.0477562	0.0722265	-0.0091997	0.103148	0.103646		2.59333	0.498869	0.517442	-0.00233089	0.0811472	-0.0143258	0.0622784	0.0755832
2.59667	0.18368	0.243929	0.0494335	0.0708139	-0.00795469	0.105238	0.105282		2.59667	0.502654	0.5177	-0.00193345	0.0846024	-0.0148969	0.0662884	0.0729881
2.6	0.190233	0.24321	0.0529565	0.0723702	-0.00722323	0.10383	0.100584		2.6	0.500895	0.51487	-0.00421942	0.0786938	-0.0189105	0.0620093	0.0755086
2.60333	0.19312	0.247512	0.0496156	0.0689838	-0.00704238	0.105392	0.102771		2.60333	0.501247	0.516459	-0.00694279	0.0850841	-0.0148009	0.0650401	0.0719365
2.60667	0.187507	0.243449	0.0508278	0.0703796	-0.0060458	0.107691	0.102931		2.60667	0.500532	0.517077	-0.0042212	0.0808354	-0.0165103	0.0604461	0.0759735
2.61	0.191298	0.245664	0.0477862	0.0709451	-0.00926442	0.103223	0.104768		2.61	0.504338	0.517483	-0.00307123	0.0820642	-0.0167918	0.0638495	0.0763584
2.61333	0.187627	0.244569	0.0464257	0.0766774	-0.00741987	0.103476	0.103851		2.61333	0.497707	0.522312	-0.00550468	0.0818296	-0.0142233	0.0610726	0.0774555
2.61667	0.190198	0.245689	0.0496218	0.0709813	-0.00684703	0.104749	0.101971		2.61667	0.501654	0.515316	-0.0025935	0.077155	-0.0169402	0.0656401	0.0784819
2.62	0.188413	0.241552	0.052004	0.0688429	-0.00294863	0.105761	0.104995		2.62	0.501192	0.519072	-0.00841869	0.0798708	-0.0167521	0.0621689	0.0747251
2.62333	0.190001	0.245133	0.0511998	0.0758197	-0.00770638	0.102447	0.10183		2.62333	0.499508	0.522032	-0.00709616	0.0788792	-0.0155759	0.0660896	0.0738949
2.62667	0.188204	0.243592	0.0481424	0.0713218	-0.010327	0.104913	0.102327		2.62667	0.495038	0.520308	-0.00746478	0.0742894	-0.0154884	0.0658361	0.0728002
2.63	0.187904	0.244751	0.0524951	0.0753272	-0.00663364	0.107402	0.106846		2.63	0.503875	0.517122	-0.00690823	0.0791656	-0.013059	0.0630225	0.0760823
2.63333	0.190608	0.24427	0.0468459	0.0754738	-0.00855035	0.104512	0.105309		2.63333	0.505786	0.516924	-0.0084974	0.0807028	-0.0192955	0.0620762	0.0759549
2.63667	0.190182	0.244609	0.051966	0.0732982	-0.00659501	0.108443	0.103679		2.63667	0.502011	0.520933	-0.00838723	0.0809318	-0.0176943	0.0652614	0.0767674
2.64	0.191044	0.243114	0.050696	0.0703629	-0.00343541	0.103906	0.10657		2.64	0.50178	0.521263	-0.00868403	0.0804812	-0.0140722	0.0642304	0.0748645
2.64333	0.190709	0.241364	0.0498729	0.0710573	-0.00698642	0.107875	0.106644		2.64333	0.500086	0.515617	-0.00815848	0.0791734	-0.0201778	0.062299	0.0755647
2.64667	0.191013	0.245362	0.0504521	0.0690726	-0.00748498	0.10649	0.104993		2.64667	0.501167	0.516435	-0.00752897	0.0797171	-0.0122605	0.0707586	0.0729646
2.65	0.189823	0.247184	0.0513876	0.0675632	-0.00527522	0.103725	0.102986		2.65	0.501647	0.521018	-0.00694057	0.0815899	-0.0142507	0.0672917	0.0747236
2.65333	0.186596	0.244667	0.0518779	0.0735046	-0.0104295	0.107101	0.106418		2.65333	0.505698	0.52021	-0.00625807	0.0849706	-0.01269	0.065612	0.0738628
2.65667	0.187967	0.246174	0.0474092	0.074492	-0.00479387	0.104898	0.102177		2.65667	0.500328	0.517578	-0.00819315	0.0833756	-0.0158274	0.063966	0.0745095
2.66	0.189428	0.24107	0.0460037	0.0712338	-0.00515117	0.108349	0.105923		2.66	0.504815	0.518713	-0.0087019	0.0749154	-0.0138237	0.0636949	0.0747207
2.66333	0.191973	0.245488	0.0506324	0.0729279	-0.0039824	0.111335	0.105028		2.66333	0.500108	0.520019	-0.00679975	0.0835256	-0.0146504	0.0628241	0.0793511
2.66667	0.183486	0.244933	0.0483581	0.072918	-0.0054291	0.108754	0.101531		2.66667	0.502862	0.516337	-0.00526668	0.0807215	-0.0174139	0.0658514	0.0727169
2.67	0.189741	0.243628	0.0506053	0.0707582	-0.0062532	0.110259	0.104528		2.67	0.504606	0.519319	-0.00381298	0.0856123	-0.0165719	0.0603513	0.0699665
2.67333	0.186234	0.244746	0.0502887	0.075101	-0.00947202	0.104194	0.101319		2.67333	0.50292	0.520384	-0.0138149	0.0769244	-0.016864	0.0667777	0.0758874
2.67667	0.189968	0.243306	0.0462277	0.0739609	-0.00905224	0.103832	0.104857		2.67667	0.497733	0.516526	-0.00952681	0.0814107	-0.0144933	0.0649293	0.0781726
2.68	0.193771	0.241323	0.052129	0.0695555	-0.00428541	0.107022	0.101824		2.68	0.497141	0.519948	-0.00840262	0.077014	-0.00974523	0.0654639	0.0751168
2.68333	0.18731	0.244476	0.0474454	0.0759727	-0.00802243	0.108013	0.10514		2.68333	0.500995	0.518676	-0.013852	0.0842738	-0.0176539	0.05963	0.0704728
2.68667	0.187891	0.245464	0.0458147	0.0747333	-0.00481259	0.105387	0.109264		2.68667	0.502538	0.51654	-0.0107475	0.0816484	-0.0146452	0.0624427	0.0764282
2.69	0.190626	0.242021	0.0520639	0.0718958	-0.0109631	0.105853	0.105851		2.69	0.504115	0.518722	-0.00808313	0.080938	-0.0158866	0.0624106	0.0768972
2.69333	0.191415	0.243434	0.0528063	0.0671589	-0.00338507	0.104817	0.10239		2.69333	0.500857	0.521138	-0.00644028	0.0791843	-0.0123484	0.063306	0.0732908
2.69667	0.18702	0.242334	0.0504972	0.0723895	-0.00441157	0.111033	0.104117		2.69667	0.501441	0.520238	-0.010217	0.0751417	-0.0160974	0.0658071	0.0791179
2.7	0.188552	0.245779	0.0482716	0.0744151	-0.00841731	0.110579	0.104052		2.7	0.496767	0.521905	-0.00838994	0.0774148	-0.0157096	0.0628366	0.0773961
2.70333	0.188309	0.244586	0.048713	0.0690555	-0.0077247	0.108059	0.106043		2.70333	0.504377	0.514444	-0.0064852	0.0782932	-0.0174518	0.0665545	0.0778949
2.70667	0.19087	0.240878	0.0485822	0.0745716	-0.0119418	0.106909	0.0990435		2.70667	0.501054	0.516312	-0.0107077	0.0755801	-0.0152106	0.066028	0.0735348
2.71	0.190733	0.247651	0.0477552	0.0723452	-0.007649	0.107035	0.107836		2.71	0.501644	0.51884	-0.00633286	0.0776564	-0.0101762	0.0606953	0.076143
2.71333	0.191373	0.244767	0.0515355	0.0759506	-0.0058813	0.110748	0.103863		2.71333	0.499899	0.520806	-0.0110239	0.080086	-0.0166168	0.0665968	0.0755155
2.71667	0.190104	0.243023	0.0508114	0.0703345	-0.00498993	0.108489	0.104853		2.71667	0.501072	0.519327	-0.00763074	0.0787488	-0.0100907	0.0643369	0.0759772
2.72	0.190334	0.243222	0.0498175	0.0700357	-0.0026584	0.109844	0.104769		2.72	0.501033	0.515241	-0.00632198	0.0835102	-0.0127507	0.0671034	0.0780373
2.72333	0.192196	0.245904	0.0536669	0.069678	-0.00596613	0.111205	0.104369		2.72333	0.500917	0.517918	-0.00767621	0.0813496	-0.0173488	0.0653369	0.0800845
2.72667	0.192722	0.24734	0.0468647	0.0711559	-0.0095262	0.112229	0.104262		2.72667	0.503527	0.518868	-0.0142765	0.0798127	-0.0181519	0.0688709	0.0738601
2.73	0.187833	0.241844	0.0526468	0.0738558	-0.00494321	0.109654	0.106033		2.73	0.505043	0.514531	-0.0147194	0.0759831	-0.0139481	0.0668391	0.0786468
2.73333	0.189798	0.244545	0.0506196	0.0708599	-0.00442049	0.107383	0.107364		2.73333	0.496281	0.516886	-0.0113189	0.0841494	-0.0169228	0.0677551	0.0788794
2.73667	0.187806	0.24548	0.0470634	0.0774067	-0.00774126	0.111845	0.104162		2.73667	0.49903	0.521373	-0.0122098	0.0791107	-0.0170336	0.0647087	0.0797636
2.74	0.192851	0.240892	0.0515621	0.0737211	-0.00699833	0.108762	0.105276		2.74	0.500587	0.519684	-0.0102269	0.0818721	-0.0170104	0.0642217	0.0775487
2.74333	0.194198	0.247521	0.0476417	0.0731101	-0.0101822	0.106088	0.104971		2.74333	0.502276	0.519444	-0.010605	0.082418	-0.0139157	0.0669583	0.0771109
2.74667	0.187493	0.245058	0.0517543	0.0713176	-0.00832668	0.104759	0.105871		2.74667	0.501514	0.519906	-0.00827531	0.0804075	-0.0132437	0.0656532	0.0767469
2.75	0.191278	0.243585	0.0471308	0.0722718	-0.00552934	0.111579	0.107973		2.75	0.499129	0.519111	-0.010112	0.077453	-0.0127433	0.0684684	0.077567
2.75333	0.192812	0.245682	0.0501159	0.0715654	-0.00915679	0.109751	0.110259		2.75333	0.504664	0.518812	-0.0103026	0.0799336	-0.0146729	0.0684718	0.0789246
2.75667	0.189893	0.240393	0.0493786	0.0720932	-0.0121373	0.109517	0.104307		2.75667	0.501595	0.51853	-0.0132135	0.0790467	-0.0194738	0.0659908	0.0764718
2.76	0.189167	0.242192	0.0503143	0.0704355	-0.00396354	0.106907	0.107256		2.76	0.497826	0.516996	-0.00785604	0.0851371	-0.0164289	0.067833	0.0770474
2.76333	0.18619	0.244885	0.0527294	0.0743993	-0.00789195	0.110369	0.108651		2.76333	0.502836	0.517067	-0.00862894	0.0794178	-0.0138035	0.0650695	0.0802619
2.76667	0.188742	0.247812	0.0436778	0.0738088	-0.00999793	0.108991	0.103898		2.76667	0.503327	0.519106	-0.00731995	0.0792556	-0.0143608	0.0693055	0.0799433
2.77	0.191288	0.243934	0.0518455	0.0707198	-0.00622402	0.108609	0.107442		2.77	0.501347	0.516408	-0.013576	0.0775457	-0.0182332	0.062609	0.0774865
2.77333	0.196333	0.248016	0.048507	0.0717423	-0.00355778	0.109851	0.107883		2.77333	0.498209	0.52265	-0.01012	0.0756632	-0.0154719	0.0698073	0.0791664
2.77667	0.183689	0.245275	0.0467183	0.0721107	-0.00785656	0.109541	0.105172		2.77667	0.50092	0.520352	-0.0095686	0.0748044	-0.0178169	0.0661327	0.0812715
2.78	0.187478	0.245006	0.0461701	0.0719182	-0.00626044	0.109497	0.106095		2.78	0.500744	0.516401	-0.0129079	0.0764334	-0.0173805	0.0640538	0.07286
2.78333	0.190914	0.248292	0.047344	0.0737186	-0.00706511	0.111431	0.106415		2.78333	0.499013	0.520325	-0.0159581	0.0769769	-0.0191296	0.0635286	0.0775495
2.78667	0.190823	0.246367	0.0493228	0.0738575	-0.00127246	0.112737	0.107257		2.78667	0.501717	0.517566	-0.0077144	0.0772367	-0.0145951	0.0658082	0.0810688
2.79	0.186237	0.248193	0.0475497	0.0719598	-0.00896479	0.112142	0.106913		2.79	0.497774	0.518664	-0.0115536	0.0800653	-0.0117867	0.064241	0.0800368
2.79333	0.191809	0.245485	0.0476316	0.0744565	-0.00760238	0.115896	0.104109		2.79333	0.500767	0.517908	-0.0107282	0.074786	-0.0151166	0.0680411	0.0800355
2.79667	0.191319	0.249951	0.0471963	0.0716695	-0.0084239	0.115529	0.105083		2.79667	0.501027	0.514728	-0.0115846	0.0744024	-0.0196757	0.0671664	0.0780777
2.8	0.184993	0.244081	0.0467309	0.0730925	-0.004857	0.113814	0.107052		2.8	0.502038	0.52029	-0.0180115	0.0750766	-0.0166828	0.0649588	0.0764032
2.80333	0.189269	0.246035	0.0493358	0.069247	-0.0106	0.11031	0.102907		2.80333	0.499509	0.521554	-0.0121443	0.0819788	-0.0108123	0.0690849	0.076577
2.80667	0.194162	0.248279	0.0467429	0.0706622	-0.00293169	0.110294	0.108244		2.80667	0.501769	0.521511	-0.00878106	0.0758532	-0.0153654	0.0691671	0.0796247
2.81	0.186136	0.244182	0.0468821	0.0704063	-0.00501502	0.111509	0.105832		2.81	0.499544	0.522036	-0.0115897	0.0768462	-0.0166573	0.0634602	0.0778847
2.81333	0.191165	0.24477	0.0495222	0.0724367	-0.00758076	0.110503	0.111501		2.81333	0.49606	0.519672	-0.0166816	0.0797814	-0.010888	0.0693355	0.0805226
2.81667	0.187649	0.246328	0.0512285	0.0708906	-0.00516735	0.107138	0.110417		2.81667	0.499238	0.517213	-0.0136077	0.0780849	-0.0150136	0.0645356	0.0783191
2.82	0.188636	0.249851	0.0499657	0.0735584	-0.00846783	0.111659	0.111961		2.82	0.502754	0.520643	-0.0163241	0.0804331	-0.0159363	0.0685087	0.0833309
2.82333	0.189969	0.244739	0.0467273	0.07525	-0.00684542	0.114109	0.111066		2.82333	0.499668	0.520184	-0.0159497	0.0758268	-0.0194542	0.0648025	0.0743945
2.82667	0.190572	0.245543	0.0519371	0.0687377	-0.00615376	0.113687	0.108467		2.82667	0.503353	0.514248	-0.0137702	0.0782729	-0.0198934	0.0642762	0.0807852
2.83	0.188723	0.247279	0.0491209	0.0730119	-0.0111856	0.11121	0.10907		2.83	0.504573	0.523433	-0.0125824	0.0723321	-0.0152211	0.0665257	0.0776014
2.83333	0.190447	0.252198	0.0467263	0.0719431	-0.00633152	0.112193	0.105894		2.83333	0.502604	0.519818	-0.0148895	0.0747496	-0.0204984	0.0635647	0.0768095
2.83667	0.191301	0.247357	0.0516447	0.0700076	-0.00568087	0.111944	0.110034		2.83667	0.499971	0.518079	-0.00748597	0.0792643	-0.0150111	0.0672466	0.0799886
2.84	0.188908	0.244874	0.0476749	0.0713903	-0.00814143	0.11223	0.10623		2.84	0.501697	0.524156	-0.0122943	0.0724819	-0.0176114	0.0688286	0.0792935
2.84333	0.192237	0.24791	0.0521155	0.0720295	-0.00557472	0.111744	0.105582		2.84333	0.499663	0.516655	-0.0130258	0.0750017	-0.0184274	0.0689951	0.0745723
2.84667	0.192218	0.244773	0.051518	0.0744592	-0.0053494	0.109979	0.109611		2.84667	0.497495	0.517086	-0.00841279	0.0811181	-0.0127303	0.0705328	0.0794151
2.85	0.190617	0.247999	0.0507015	0.0733011	-0.00660988	0.11164	0.106903		2.85	0.502055	0.517676	-0.0117252	0.0734265	-0.0153276	0.066505	0.0803084
2.85333	0.188691	0.248676	0.0522215	0.0687208	-0.00551273	0.113405	0.110707		2.85333	0.503767	0.522853	-0.0116902	0.0788366	-0.015215	0.0671396	0.0788437
2.85667	0.188031	0.247898	0.0514998	0.0716597	-0.00433246	0.109435	0.102656		2.85667	0.505092	0.518928	-0.0139144	0.0765348	-0.0188933	0.0711043	0.0795957
2.86	0.18683	0.242862	0.0493665	0.071354	-0.00527886	0.115361	0.103167		2.86	0.49902	0.516372	-0.0174266	0.080951	-0.0193277	0.0665112	0.0794335
2.86333	0.19015	0.247136	0.0516961	0.0700908	-0.00341169	0.113978	0.103409		2.86333	0.506462	0.513131	-0.0161005	0.0732032	-0.0160779	0.0660409	0.0782441
2.86667	0.193117	0.248101	0.0446445	0.0738555	-0.00856809	0.113096	0.110155		2.86667	0.500701	0.520284	-0.016843	0.0733586	-0.0190847	0.0693409	0.0789991
2.87	0.18945	0.243685	0.0475661	0.0718594	-0.00527829	0.112941	0.110084		2.87	0.50244	0.518295	-0.0128979	0.0787723	-0.0161135	0.0664745	0.0777416
2.87333	0.187441	0.244451	0.0487245	0.0655475	-0.00779812	0.112333	0.112101		2.87333	0.502488	0.520098	-0.0181835	0.0746231	-0.0157563	0.0669874	0.081968
2.87667	0.192323	0.249929	0.0472284	0.0686166	-0.00442153	0.110816	0.108479		2.87667	0.501984	0.521534	-0.0148463	0.0764747	-0.0177856	0.0674143	0.0814388
2.88	0.18941	0.244465	0.0467053	0.0732075	-0.00494589	0.111404	0.108059		2.88	0.503904	0.519758	-0.0141986	0.0727765	-0.0172257	0.0691102	0.079474
2.88333	0.190106	0.245314	0.046918	0.0751877	-0.00305885	0.114608	0.107116		2.88333	0.501337	0.522711	-0.0119373	0.0710668	-0.0128823	0.0676293	0.0796769
2.88667	0.189743	0.246373	0.0488774	0.0716171	-0.00561429	0.115638	0.107661		2.88667	0.498258	0.513618	-0.0100115	0.0752386	-0.0116669	0.0674059	0.0803995
2.89	0.193255	0.249429	0.0479688	0.0737415	-0.00822797	0.113161	0.106526		2.89	0.502082	0.518827	-0.00895467	0.0741709	-0.0160626	0.0692853	0.0822971
2.89333	0.188814	0.248641	0.0480547	0.069887	-0.00446159	0.113099	0.108283		2.89333	0.498494	0.51949	-0.012639	0.0707086	-0.0156737	0.0664665	0.078903
2.89667	0.191513	0.246685	0.0464923	0.0693377	-0.00977508	0.113942	0.111575		2.89667	0.499296	0.519222	-0.0191106	0.0697903	-0.0201816	0.0678064	0.0781749
2.9	0.188726	0.247875	0.0494265	0.073181	-0.0105911	0.113127	0.109367		2.9	0.498076	0.522238	-0.0139384	0.075549	-0.0194718	0.0723184	0.078694
2.90333	0.188944	0.242772	0.0472544	0.0767796	-0.0043635	0.110659	0.110352		2.90333	0.501178	0.518315	-0.0197873	0.0764905	-0.0125688	0.0678668	0.0816434
2.90667	0.187737	0.247104	0.0426399	0.0716279	-0.00847002	0.114477	0.109591		2.90667	0.495805	0.520453	-0.0125551	0.0761457	-0.022789	0.0672948	0.0796327
2.91	0.183599	0.244572	0.04618	0.0722765	-0.010459	0.110438	0.10707		2.91	0.500309	0.516302	-0.0138994	0.0767508	-0.0173009	0.0679842	0.0811043
2.91333	0.189142	0.251512	0.0452456	0.0706289	-0.00610965	0.114783	0.110101		2.91333	0.503155	0.518951	-0.0175006	0.0743344	-0.0161707	0.066943	0.0819382
2.91667	0.192743	0.247007	0.0467478	0.0762243	-0.00611954	0.117495	0.105488		2.91667	0.500659	0.519136	-0.0143319	0.0761276	-0.0161292	0.0661712	0.0767225
2.92	0.187774	0.243959	0.0477898	0.0765505	-0.00711845	0.106891	0.111148		2.92	0.499884	0.514399	-0.013518	0.0720767	-0.0153332	0.0661676	0.0782524
2.92333	0.188063	0.246303	0.0501736	0.0709429	-0.00765184	0.114177	0.106237		2.92333	0.500347	0.517972	-0.0150327	0.0707087	-0.0128083	0.0684239	0.0800852
2.92667	0.188962	0.251456	0.0473826	0.0755082	-0.00755097	0.111884	0.10978		2.92667	0.504087	0.516716	-0.0156396	0.0769592	-0.0175802	0.0693785	0.0774768
2.93	0.189362	0.246253	0.0481156	0.072348	-0.00782494	0.115042	0.10727		2.93	0.497946	0.514215	-0.0167407	0.0785861	-0.0131798	0.0677877	0.0792031
2.93333	0.187528	0.249684	0.051198	0.0718052	-0.00328372	0.114453	0.109944		2.93333	0.499211	0.515325	-0.0204697	0.0742014	-0.01693	0.0676246	0.0795445
2.93667	0.189494	0.244194	0.0519391	0.0688081	-0.00501073	0.113754	0.111741		2.93667	0.498097	0.515699	-0.0184044	0.0743664	-0.0172991	0.0689505	0.0789732
2.94	0.190563	0.243804	0.0526432	0.0709453	-0.00905155	0.11533	0.111397		2.94	0.504103	0.515842	-0.0171687	0.0751185	-0.0172005	0.0695252	0.0763478
2.94333	0.189287	0.24546	0.050443	0.0726403	-0.00499158	0.114752	0.10933		2.94333	0.502269	0.517354	-0.0159611	0.0734737	-0.0165062	0.0697179	0.0807535
2.94667	0.189397	0.243134	0.048649	0.070826	-0.00942469	0.117421	0.108315		2.94667	0.496937	0.514875	-0.0139787	0.0723595	-0.0141292	0.0696631	0.0781411
2.95	0.190038	0.251273	0.0485385	0.0678544	-0.00771868	0.112669	0.108595		2.95	0.500314	0.518912	-0.0127403	0.0721158	-0.0144813	0.0689446	0.0804897
2.95333	0.188431	0.250854	0.0487216	0.0704001	-0.00810636	0.11658	0.111728		2.95333	0.498548	0.519453	-0.0149966	0.0734907	-0.0184588	0.0698467	0.0785157
2.95667	0.190693	0.24982	0.0494208	0.07307	-0.00884015	0.112068	0.10934		2.95667	0.500314	0.518146	-0.0137216	0.0733543	-0.0171582	0.0691232	0.0817419
2.96	0.189342	0.249138	0.0506014	0.0734594	-0.00830963	0.114145	0.110567		2.96	0.501519	0.515824	-0.0136074	0.0734312	-0.0176862	0.0751864	0.0837321
2.96333	0.188015	0.246224	0.0512752	0.0678214	-0.00667182	0.118882	0.112919		2.96333	0.505482	0.518227	-0.0167248	0.0729939	-0.0150534	0.0714255	0.0841937
2.96667	0.188724	0.248352	0.0457952	0.0706968	-0.0114211	0.1149	0.106749		2.96667	0.504511	0.517304	-0.0150157	0.0752439	-0.0190203	0.0709181	0.0783812
2.97	0.192037	0.248727	0.0472563	0.0719902	-0.00968187	0.115815	0.110954		2.97	0.500836	0.517074	-0.0111461	0.0732918	-0.0159174	0.0716425	0.0774546
2.97333	0.192933	0.247895	0.0463152	0.0721096	-0.00638841	0.11444	0.112527		2.97333	0.509633	0.518747	-0.00909645	0.0756091	-0.0199469	0.0705006	0.0811835
2.97667	0.19013	0.249054	0.0455991	0.0727264	-0.0069073	0.11732	0.109568		2.97667	0.498236	0.518934	-0.0159975	0.0773274	-0.0171379	0.0724074	0.0830092
2.98	0.190647	0.252564	0.0490414	0.0700216	-0.00858444	0.118771	0.107201		2.98	0.505307	0.519491	-0.0185886	0.071686	-0.0148286	0.0695641	0.0820229
2.98333	0.188917	0.247534	0.0474962	0.071647	-0.00908525	0.118586	0.11045		2.98333	0.503613	0.518944	-0.0163762	0.0731088	-0.0157898	0.0710297	0.0806191
2.98667	0.187698	0.246032	0.0484091	0.0670364	-0.00863907	0.114166	0.109456		2.98667	0.504599	0.517134	-0.0148706	0.0743618	-0.0177272	0.0734742	0.0814552
2.99	0.186534	0.24698	0.0460612	0.0695594	-0.0048132	0.11838	0.107418		2.99	0.497295	0.520144	-0.0189944	0.0750339	-0.0190329	0.0716176	0.0833648
2.99333	0.19116	0.2469	0.0488704	0.0688337	-0.00506975	0.117986	0.108013		2.99333	0.502655	0.516007	-0.0161363	0.0708241	-0.0131468	0.0725345	0.0831431
2.99667	0.19123	0.248045	0.044729	0.0739402	-0.0100869	0.111932	0.110516		2.99667	0.506841	0.519723	-0.0166346	0.0724248	-0.0182022	0.0691457	0.0803382
3	0.189416	0.247053	0.0481608	0.0714021	-0.00942669	0.11651	0.112085		3	0.502081	0.515072	-0.0179765	0.0708352	-0.0172443	0.0711532	0.0823436
3.00333	0.191589	0.248136	0.0513753	0.0732103	-0.00645713	0.119698	0.110273		3.00333	0.50245	0.513994	-0.0150401	0.0715777	-0.0155672	0.0710427	0.0835477
3.00667	0.187166	0.248677	0.0455507	0.0694724	-0.0105377	0.116089	0.111084		3.00667	0.500766	0.516743	-0.0164931	0.0759291	-0.017661	0.0729804	0.0809
3.01	0.189078	0.248633	0.0478857	0.0702315	-0.00669576	0.119536	0.112784		3.01	0.499861	0.517565	-0.0193928	0.0743737	-0.0172139	0.067467	0.0852366
3.01333	0.189956	0.246303	0.044419	0.0686617	-0.0077414	0.118737	0.112752		3.01333	0.50149	0.517378	-0.0167069	0.075525	-0.0166168	0.0706942	0.0847784
3.01667	0.189786	0.245882	0.0489003	0.071918	-0.00671071	0.115158	0.112447		3.01667	0.503105	0.518438	-0.0121408	0.0710904	-0.0186304	0.0706919	0.0846265
3.02	0.186828	0.247952	0.0503963	0.0706151	-0.00604706	0.116292	0.1091		3.02	0.502594	0.515227	-0.0121317	0.0765236	-0.0168212	0.0730599	0.0816736
3.02333	0.190367	0.244925	0.0502269	0.0739329	-0.002483	0.115231	0.109448		3.02333	0.496671	0.514944	-0.0173137	0.0750606	-0.0191637	0.0720395	0.0853953
3.02667	0.193911	0.247619	0.0474999	0.0733707	-0.00732143	0.117546	0.108013		3.02667	0.501341	0.517162	-0.0156439	0.0668175	-0.0173896	0.0744568	0.0809138
3.03	0.193276	0.24935	0.046919	0.0692195	-0.00586924	0.117898	0.106554		3.03	0.502551	0.5197	-0.0204505	0.0698722	-0.0163782	0.0703153	0.0836578
3.03333	0.188898	0.247728	0.0492855	0.075904	-0.0056965	0.117359	0.106414		3.03333	0.504375	0.518143	-0.0184341	0.0706257	-0.0232096	0.0733556	0.0819149
3.03667	0.1891	0.24655	0.0439904	0.0708952	-0.00504844	0.117863	0.10921		3.03667	0.503936	0.51824	-0.0189523	0.0705728	-0.0196389	0.0745737	0.0840253
3.04	0.19135	0.248588	0.04654	0.0720446	-0.0059814	0.118317	0.109791		3.04	0.503683	0.519795	-0.0208413	0.0731772	-0.0162914	0.0699908	0.0861929
3.04333	0.19025	0.243755	0.0463636	0.0707648	-0.00590791	0.117481	0.107928		3.04333	0.505986	0.519047	-0.0152276	0.0737956	-0.0184533	0.073557	0.0826163
3.04667	0.190766	0.246311	0.0527391	0.0738992	-0.00871967	0.115043	0.111874		3.04667	0.502806	0.516936	-0.0176142	0.069249	-0.01815	0.0740097	0.082055
3.05	0.192679	0.248387	0.05363	0.0723753	-0.00744567	0.119374	0.10896		3.05	0.503728	0.519752	-0.0139536	0.0750939	-0.0194508	0.0723525	0.0905663
3.05333	0.18967	0.24703	0.0488808	0.0694381	-0.00581633	0.113966	0.114784		3.05333	0.502915	0.517958	-0.015498	0.0723021	-0.0165809	0.0699126	0.0834736
3.05667	0.186558	0.247617	0.0480254	0.0712768	-0.00527944	0.119446	0.108623		3.05667	0.501425	0.519371	-0.016165	0.0716759	-0.0188317	0.071708	0.0776766
3.06	0.188745	0.248793	0.0459664	0.0716788	-0.00599426	0.122389	0.115344		3.06	0.503914	0.515163	-0.0169203	0.0751198	-0.0208161	0.0737865	0.0857031
3.06333	0.194431	0.247154	0.0454426	0.0690824	-0.00688521	0.116751	0.10698		3.06333	0.500163	0.51617	-0.0196814	0.0709265	-0.0170919	0.0706659	0.0864279
3.06667	0.193512	0.247916	0.0513724	0.0693337	-0.0109388	0.115889	0.11406		3.06667	0.502338	0.515254	-0.0154829	0.072415	-0.0151758	0.0715567	0.0881955
3.07	0.187838	0.248083	0.0482536	0.0720809	-0.00756868	0.116473	0.112328		3.07	0.502929	0.518723	-0.0196444	0.0742291	-0.0187481	0.0724628	0.0850926
3.07333	0.188068	0.251528	0.0482341	0.072095	-0.010836	0.121818	0.112505		3.07333	0.500937	0.522362	-0.0204263	0.07156	-0.0177066	0.0728662	0.0863321
3.07667	0.189442	0.248913	0.0472852	0.0705094	-0.0097727	0.119482	0.110312		3.07667	0.497176	0.510332	-0.0195839	0.0764446	-0.0170398	0.0745636	0.086831
3.08	0.189623	0.248751	0.0453485	0.0699379	-0.00652347	0.119522	0.108676		3.08	0.497661	0.515479	-0.0199647	0.0722185	-0.0164815	0.0713744	0.0856605
3.08333	0.18768	0.244486	0.0454947	0.0710186	-0.00440003	0.116514	0.10961		3.08333	0.502826	0.517872	-0.0195839	0.0685408	-0.0183276	0.0700016	0.080133
3.08667	0.191991	0.247519	0.0499506	0.0745131	-0.00815666	0.118139	0.11026		3.08667	0.498889	0.519394	-0.0232347	0.0713604	-0.0166862	0.0724058	0.0838749
3.09	0.19	0.248333	0.0434388	0.0726195	-0.00775388	0.121106	0.111227		3.09	0.498104	0.515944	-0.0178407	0.0734966	-0.0174599	0.0745977	0.083081
3.09333	0.189331	0.248335	0.0478191	0.0675353	-0.00594722	0.118332	0.114302		3.09333	0.506268	0.513433	-0.0183907	0.0709921	-0.0164524	0.0704048	0.0851291
3.09667	0.184426	0.249661	0.0483803	0.0700542	-0.00982233	0.113984	0.110818		3.09667	0.500024	0.51718	-0.0210461	0.0726957	-0.0170583	0.0732924	0.0832211
3.1	0.187727	0.248916	0.0509507	0.0685229	-0.00596994	0.123595	0.108145		3.1	0.504214	0.518653	-0.0202414	0.0695738	-0.0147911	0.0755225	0.085752
3.10333	0.191536	0.248926	0.0430611	0.0657455	-0.00588075	0.117954	0.110169		3.10333	0.496583	0.51145	-0.0217014	0.0717953	-0.017721	0.0711886	0.0851137
3.10667	0.192916	0.248392	0.0462639	0.0723202	-0.0082824	0.119506	0.109765		3.10667	0.504021	0.520164	-0.0177868	0.0708609	-0.0197499	0.0729927	0.0849083
3.11	0.192441	0.248969	0.045139	0.0682366	-0.0081265	0.121919	0.108816		3.11	0.502239	0.518979	-0.0225299	0.0722671	-0.0157771	0.0710811	0.0834871
3.11333	0.188639	0.249641	0.0488466	0.0685821	-0.00801299	0.117719	0.11295		3.11333	0.503187	0.515321	-0.016926	0.0732722	-0.0180044	0.0739679	0.0813758
3.11667	0.189147	0.245047	0.0484796	0.0698465	-0.00373671	0.121076	0.114676		3.11667	0.499006	0.518503	-0.0207676	0.0705714	-0.0165906	0.0682353	0.0867474
3.12	0.194869	0.251558	0.046932	0.0715045	-0.00871152	0.118894	0.114026		3.12	0.50363	0.518886	-0.0183419	0.0744464	-0.0164163	0.0736759	0.0851087
3.12333	0.194668	0.246967	0.046066	0.0682632	-0.0045687	0.1183	0.112331		3.12333	0.502575	0.513517	-0.0191382	0.0655023	-0.0210569	0.0704883	0.0836882
3.12667	0.189974	0.24466	0.0429593	0.0732236	-0.00942756	0.120386	0.113027		3.12667	0.500533	0.515969	-0.0196603	0.0731042	-0.0190382	0.0717051	0.0852411
3.13	0.191326	0.247969	0.0471238	0.0678943	-0.00837593	0.120216	0.115468		3.13	0.501079	0.519875	-0.0199176	0.0766782	-0.0177492	0.0707716	0.0822262
3.13333	0.18936	0.244485	0.0469171	0.0730504	-0.00589679	0.120685	0.11149		3.13333	0.502501	0.517429	-0.0187751	0.0740836	-0.0162173	0.0700846	0.0867853
3.13667	0.192171	0.247532	0.0459338	0.0752276	-0.00705364	0.118197	0.11689		3.13667	0.50421	0.515571	-0.0223859	0.0719813	-0.0165778	0.0755064	0.0825989
3.14	0.188056	0.252726	0.0460416	0.0716856	-0.00771939	0.117427	0.109805		3.14	0.500326	0.514856	-0.0219835	0.069954	-0.0205856	0.0719479	0.0839863
3.14333	0.192759	0.242335	0.0437504	0.0716555	-0.00420099	0.120463	0.110594		3.14333	0.502898	0.517297	-0.0200383	0.0720768	-0.0174013	0.0706493	0.0867879
3.14667	0.186817	0.248177	0.044362	0.069436	-0.00822783	0.116692	0.111295		3.14667	0.500002	0.512736	-0.0212942	0.0694112	-0.0190511	0.0724499	0.0825715
3.15	0.193305	0.250495	0.0526443	0.0732433	-0.00653989	0.121319	0.114318		3.15	0.496992	0.515718	-0.0181825	0.0738949	-0.0177553	0.0724865	0.0862198
3.15333	0.190013	0.249573	0.0512033	0.0680835	-0.00687067	0.119552	0.112721		3.15333	0.50785	0.516059	-0.0187471	0.0713604	-0.017435	0.0765409	0.0836533
3.15667	0.187768	0.250808	0.0515643	0.0700479	-0.00549557	0.112972	0.11341		3.15667	0.498269	0.516773	-0.0218193	0.0701887	-0.017526	0.06965	0.0841911
3.16	0.190974	0.247313	0.0456226	0.0723793	-0.00450188	0.115422	0.115041		3.16	0.499205	0.51443	-0.0247028	0.0715028	-0.0192459	0.0750536	0.0849696
3.16333	0.187123	0.244819	0.0462493	0.0743556	-0.0101297	0.118456	0.115103		3.16333	0.502779	0.516234	-0.0216365	0.0722433	-0.0188143	0.0758327	0.0844055
3.16667	0.18976	0.246017	0.0489273	0.0696733	-0.00987614	0.117437	0.112474		3.16667	0.498524	0.517896	-0.0229263	0.0673281	-0.015491	0.0746138	0.083514
3.17	0.190533	0.24889	0.0475734	0.0714592	-0.0056627	0.119749	0.11586		3.17	0.501829	0.512003	-0.0228472	0.0721359	-0.0154144	0.0765014	0.0833133
3.17333	0.193065	0.251162	0.0441111	0.0694463	-0.00805809	0.121488	0.111991		3.17333	0.503099	0.517126	-0.0219471	0.0696168	-0.0149868	0.0691602	0.0877123
3.17667	0.191206	0.248397	0.0448278	0.0722969	-0.00557261	0.116449	0.10937		3.17667	0.49756	0.513824	-0.0212194	0.0694078	-0.0183391	0.0755356	0.0858393
3.18	0.185839	0.247995	0.0429594	0.0699471	-0.0114061	0.120466	0.114652		3.18	0.502772	0.51769	-0.0212317	0.0681715	-0.017477	0.0763245	0.0839506
3.18333	0.188154	0.245896	0.0469491	0.0706344	-0.00882567	0.12308	0.115746		3.18333	0.504211	0.520586	-0.0212519	0.0663724	-0.0167099	0.0767377	0.0861129
3.18667	0.186651	0.250665	0.0474164	0.0726133	-0.00387058	0.122186	0.11526		3.18667	0.501092	0.512884	-0.0233988	0.0721846	-0.0181194	0.0724615	0.0882166
3.19	0.192736	0.241234	0.048153	0.0692678	-0.0084873	0.119917	0.113729		3.19	0.499561	0.516867	-0.0207209	0.0711472	-0.0180497	0.0708581	0.0842999
3.19333	0.189811	0.248975	0.0445626	0.0721465	-0.00749924	0.11962	0.116955		3.19333	0.499565	0.519594	-0.0163467	0.0714765	-0.0130142	0.0747735	0.0831526
3.19667	0.189372	0.24969	0.0487103	0.0716719	-0.00969918	0.122265	0.114306		3.19667	0.498594	0.51737	-0.0242683	0.066608	-0.0187962	0.0738727	0.0865675
3.2	0.192562	0.248399	0.0483309	0.0723468	-0.00444156	0.124604	0.115104		3.2	0.49889	0.514994	-0.0238536	0.0695787	-0.0151837	0.0767018	0.08552
3.20333	0.190816	0.250483	0.0458748	0.0719132	-0.00530689	0.11791	0.111513		3.20333	0.504553	0.517161	-0.0201898	0.0707583	-0.0202564	0.0771256	0.0891615
3.20667	0.191021	0.24359	0.0444547	0.0695603	-0.00796384	0.117898	0.113849		3.20667	0.50544	0.510647	-0.0243581	0.0699564	-0.0185593	0.0760253	0.0884841
3.21	0.190376	0.245662	0.0477156	0.0707588	-0.00912845	0.118271	0.108573		3.21	0.501787	0.517055	-0.0235079	0.0687477	-0.0152278	0.0785851	0.0888192
3.21333	0.187173	0.249005	0.0465674	0.0720914	-0.00752233	0.123501	0.111783		3.21333	0.50246	0.518934	-0.0270391	0.0700941	-0.0158619	0.0771631	0.0861955
3.21667	0.190166	0.249654	0.0493054	0.0713939	-0.00650926	0.117916	0.112387		3.21667	0.501534	0.516504	-0.0205322	0.0765856	-0.0148607	0.0762535	0.0908139
3.22	0.190424	0.248882	0.0450687	0.0688002	-0.00918699	0.121261	0.110894		3.22	0.501417	0.513902	-0.0249043	0.0731652	-0.0189338	0.0732979	0.0857798
3.22333	0.191141	0.248693	0.0472988	0.0685857	-0.00821317	0.120572	0.115862		3.22333	0.500954	0.516818	-0.0213926	0.0720359	-0.0176926	0.0727026	0.0888429
3.22667	0.188808	0.248395	0.0487017	0.0714445	-0.00737219	0.123241	0.114433		3.22667	0.503569	0.51812	-0.0220164	0.0685013	-0.0205732	0.0726362	0.0912593
3.23	0.196459	0.2498	0.0491327	0.0700645	-0.00451243	0.123422	0.108233		3.23	0.505343	0.518878	-0.025549	0.0723915	-0.0190444	0.0735251	0.0872843
3.23333	0.188784	0.249426	0.0499531	0.070989	-0.00878495	0.117535	0.115843		3.23333	0.501527	0.514987	-0.0211801	0.068569	-0.0202581	0.0763483	0.088041
3.23667	0.189078	0.254657	0.0483557	0.0688848	-0.00464556	0.121577	0.120987		3.23667	0.501589	0.520835	-0.023886	0.0697361	-0.0186055	0.0770008	0.0865898
3.24	0.193409	0.254666	0.04843	0.072863	-0.00478153	0.118425	0.113293		3.24	0.497029	0.515487	-0.0237084	0.0696191	-0.0152903	0.0787822	0.0855921
3.24333	0.191013	0.250509	0.0466956	0.073348	-0.00557056	0.120583	0.111161		3.24333	0.495488	0.514365	-0.0210712	0.0634142	-0.0208574	0.075794	0.087994
3.24667	0.192478	0.25008	0.0447254	0.0676583	-0.00520648	0.118206	0.116951		3.24667	0.501274	0.515146	-0.0216477	0.0710984	-0.0198581	0.0749388	0.0853131
3.25	0.194216	0.251063	0.0489654	0.0701334	-0.00532083	0.124474	0.115211		3.25	0.500299	0.521113	-0.0200814	0.0676799	-0.0204094	0.0754613	0.0867832
3.25333	0.192721	0.24986	0.047924	0.0720251	-0.0109915	0.119367	0.116328		3.25333	0.503462	0.518324	-0.0237938	0.0673066	-0.0149836	0.0741193	0.0925909
3.25667	0.192738	0.25143	0.0476579	0.07183	-0.00969397	0.125411	0.115339		3.25667	0.500229	0.516548	-0.0251422	0.0689957	-0.023299	0.0749893	0.0867527
3.26	0.187474	0.248348	0.0463208	0.0685448	-0.00377392	0.126024	0.115446		3.26	0.502623	0.52056	-0.0225047	0.0693673	-0.0180077	0.0767886	0.0912276
3.26333	0.18979	0.253426	0.0463213	0.0713214	-0.00591744	0.124905	0.117559		3.26333	0.499737	0.519351	-0.0258525	0.07138	-0.0159421	0.0768431	0.0865761
3.26667	0.193595	0.247011	0.0437329	0.0718498	-0.00881927	0.126249	0.110943		3.26667	0.501282	0.516133	-0.0214553	0.0632943	-0.0156849	0.0759768	0.0829067
3.27	0.189746	0.249525	0.0443527	0.0704664	-0.00420995	0.124469	0.114285		3.27	0.500623	0.518022	-0.0263202	0.0676875	-0.0184429	0.0792991	0.0900708
3.27333	0.189533	0.252024	0.0461603	0.0714539	-0.0089449	0.119835	0.113476		3.27333	0.498184	0.509275	-0.0219106	0.0718936	-0.0163396	0.0751539	0.0923536
3.27667	0.188455	0.251924	0.0492166	0.0688236	-0.00884155	0.121319	0.10933		3.27667	0.50333	0.514423	-0.0210789	0.0715766	-0.0195654	0.0754886	0.0855138
3.28	0.193983	0.248419	0.0475941	0.0692135	-0.00800982	0.124917	0.116233		3.28	0.499583	0.51368	-0.0230469	0.0712419	-0.0168515	0.0742603	0.0826069
3.28333	0.190408	0.252303	0.04896	0.071857	-0.00712038	0.124178	0.111791		3.28333	0.499256	0.514706	-0.0274832	0.0702404	-0.0153014	0.0777341	0.0906901
3.28667	0.189473	0.248546	0.046353	0.0759712	-0.00515807	0.127877	0.114648		3.28667	0.504522	0.516854	-0.0247153	0.0662001	-0.0187945	0.0790716	0.0849009
3.29	0.190283	0.246776	0.046699	0.0719969	-0.00741765	0.123488	0.120245		3.29	0.496756	0.514884	-0.0263328	0.0682286	-0.0190191	0.0741437	0.0864596
3.29333	0.190895	0.246964	0.0445316	0.0695328	-0.00907351	0.125107	0.114619		3.29333	0.501454	0.517031	-0.0238273	0.0644244	-0.0210314	0.0740046	0.0902209
3.29667	0.186947	0.248257	0.0466214	0.0755727	-0.00853745	0.12218	0.112354		3.29667	0.500109	0.515665	-0.0250553	0.0685655	-0.0173824	0.0720798	0.0854365
3.3	0.18917	0.251046	0.0450801	0.0718546	-0.00822593	0.124189	0.115381		3.3	0.49552	0.518709	-0.028491	0.0682636	-0.0153826	0.0756664	0.0893214
3.30333	0.190126	0.249538	0.0439625	0.0698316	-0.0105186	0.123575	0.111287		3.30333	0.502196	0.513271	-0.0266902	0.0671578	-0.0176793	0.0755071	0.088743
3.30667	0.193098	0.249542	0.0445955	0.0692037	-0.010602	0.128464	0.117163		3.30667	0.499064	0.513131	-0.0275942	0.0653964	-0.0180398	0.0796078	0.0845926
3.31	0.188133	0.249038	0.0500485	0.0715735	-0.00580002	0.122617	0.113552		3.31	0.499678	0.515486	-0.0258259	0.0643572	-0.0203619	0.0773967	0.0844667
3.31333	0.188947	0.247302	0.0472278	0.0680842	-0.00456749	0.123957	0.115185		3.31333	0.494951	0.51377	-0.0265926	0.0627608	-0.0196181	0.0741426	0.0927262
3.31667	0.192742	0.250232	0.0492574	0.0716069	-0.0129604	0.1235	0.115954		3.31667	0.50037	0.515442	-0.0274226	0.0680613	-0.0153683	0.0764913	0.087769
3.32	0.19025	0.247162	0.0470512	0.0735983	-0.00501454	0.124131	0.110949		3.32	0.500737	0.514528	-0.0279453	0.0663181	-0.0197196	0.0737963	0.089282
3.32333	0.191036	0.25324	0.0464756	0.0669866	-0.00778925	0.126142	0.116763		3.32333	0.501408	0.514129	-0.0246195	0.0628586	-0.0158766	0.0797284	0.0868285
3.32667	0.189253	0.252674	0.0436921	0.0666037	-0.0108364	0.122119	0.116229		3.32667	0.502165	0.511287	-0.0277145	0.0696682	-0.0176271	0.0798777	0.0899249
3.33	0.189888	0.244507	0.0482836	0.0684927	-0.0103569	0.12853	0.120864		3.33	0.498063	0.51107	-0.0275439	0.0635806	-0.0153061	0.0781868	0.0856777
3.33333	0.185637	0.248952	0.046108	0.0688231	-0.00692231	0.128322	0.114588		3.33333	0.501764	0.51448	-0.0314859	0.063586	-0.0193994	0.0768723	0.0902526
3.33667	0.191654	0.249845	0.048393	0.07337	-0.00656634	0.122272	0.116394		3.33667	0.500086	0.511896	-0.02711	0.0652132	-0.0131943	0.0759252	0.0877602
3.34	0.190925	0.250252	0.0467596	0.0691435	-0.00674802	0.12274	0.115419		3.34	0.49732	0.519269	-0.0270116	0.0669859	-0.019275	0.078309	0.0946336
3.34333	0.189347	0.248735	0.0456121	0.0694572	-0.00801815	0.127669	0.119867		3.34333	0.499231	0.516961	-0.0271593	0.0669666	-0.0233363	0.0783611	0.0894431
3.34667	0.192919	0.245804	0.0473912	0.0702271	-0.00812772	0.1261	0.115481		3.34667	0.499946	0.514656	-0.0283833	0.0667362	-0.0160203	0.0792875	0.0906239
3.35	0.190364	0.245108	0.0474646	0.0655395	-0.00671482	0.122359	0.117319		3.35	0.500145	0.515428	-0.029747	0.0627658	-0.0208298	0.0741088	0.0913165
3.35333	0.192426	0.250187	0.047558	0.0720624	-0.00813502	0.126317	0.117182		3.35333	0.497706	0.51262	-0.0284076	0.0633996	-0.0176767	0.0764088	0.0923274
3.35667	0.19193	0.250353	0.0439207	0.0707134	-0.00830823	0.123896	0.111998		3.35667	0.501196	0.510672	-0.0298223	0.0615341	-0.0193606	0.0786914	0.0898615
3.36	0.18926	0.248442	0.0443999	0.0680296	-0.00398688	0.124112	0.118168		3.36	0.498721	0.513543	-0.0273864	0.0618677	-0.0157089	0.0791689	0.0896983
3.36333	0.186832	0.251733	0.0438157	0.0681487	-0.00815176	0.126684	0.11925		3.36333	0.502867	0.513183	-0.0250425	0.0663494	-0.0157899	0.0769431	0.0885511
3.36667	0.190345	0.253813	0.039332	0.0687028	-0.00997898	0.125955	0.116147		3.36667	0.498385	0.510821	-0.0271109	0.0676492	-0.0154787	0.0786825	0.0937131
3.37	0.191669	0.245626	0.0470779	0.0719954	-0.00789115	0.124959	0.116561		3.37	0.500676	0.51194	-0.0272416	0.06289	-0.0156064	0.0740381	0.0894906
3.37333	0.190304	0.253403	0.0467514	0.0681042	-0.0071279	0.128849	0.114654		3.37333	0.500784	0.513217	-0.0291706	0.0614746	-0.0216213	0.0756267	0.0900585
3.37667	0.188221	0.248942	0.0446545	0.0671155	-0.0103912	0.124652	0.118831		3.37667	0.498387	0.514477	-0.027772	0.0663266	-0.0167699	0.0768181	0.0932509
3.38	0.192372	0.244061	0.04769	0.0733449	-0.0117732	0.123922	0.12033		3.38	0.49751	0.513928	-0.0284952	0.0666677	-0.0188115	0.0774437	0.0915308
3.38333	0.190848	0.250444	0.0482085	0.071004	-0.00767449	0.125855	0.113691		3.38333	0.501176	0.51381	-0.0282062	0.0617685	-0.0174565	0.0787315	0.092666
3.38667	0.188976	0.248404	0.0469919	0.070315	-0.00956654	0.128528	0.118644		3.38667	0.498335	0.513339	-0.029184	0.0701801	-0.0191928	0.0765857	0.0897941
3.39	0.188412	0.250082	0.0500152	0.072596	-0.00958998	0.125334	0.11446		3.39	0.497368	0.512503	-0.0297052	0.064612	-0.0171241	0.0765692	0.0966288
3.39333	0.189357	0.251331	0.0484402	0.06819	-0.0105312	0.122975	0.116708		3.39333	0.498582	0.509352	-0.0304206	0.0674055	-0.0195555	0.0748191	0.0920885
3.39667	0.190205	0.247631	0.0454283	0.0737258	-0.00715463	0.122305	0.113303		3.39667	0.494457	0.512591	-0.0273113	0.0559216	-0.0176253	0.0753079	0.09339
3.4	0.189908	0.251181	0.0444129	0.0712288	-0.00732141	0.13003	0.119593		3.4	0.495343	0.511371	-0.0275435	0.0614933	-0.0197889	0.0779448	0.090351
3.40333	0.189264	0.246175	0.0453416	0.0665365	-0.00746319	0.124941	0.11352		3.40333	0.499764	0.509936	-0.0300061	0.0638759	-0.02003	0.0786212	0.0905531
3.40667	0.190409	0.245729	0.0454678	0.068838	-0.0116186	0.127674	0.112162		3.40667	0.504132	0.513607	-0.0311658	0.0658561	-0.019078	0.07734	0.090183
3.41	0.193883	0.249256	0.047933	0.0661103	-0.00739715	0.12666	0.117407		3.41	0.500315	0.512687	-0.0346806	0.0652785	-0.0163532	0.0811041	0.0925145
3.41333	0.192626	0.251431	0.0501294	0.071048	-0.00686417	0.124785	0.118102		3.41333	0.499046	0.511063	-0.0301089	0.0602229	-0.0185333	0.0765368	0.0898498
3.41667	0.192398	0.24815	0.0488362	0.0686386	-0.00435848	0.127821	0.112283		3.41667	0.497438	0.50962	-0.0290534	0.0630817	-0.0191607	0.0794167	0.0922264
3.42	0.187583	0.249534	0.0463763	0.071401	-0.00749548	0.127732	0.119898		3.42	0.498624	0.510754	-0.0327646	0.0650667	-0.0224962	0.0803541	0.0891942
3.42333	0.189703	0.252049	0.048139	0.0684855	-0.00589392	0.120922	0.115743		3.42333	0.498051	0.508836	-0.0323277	0.0630751	-0.01943	0.077317	0.0895914
3.42667	0.191034	0.246635	0.0478537	0.0703364	-0.00542715	0.124114	0.119981		3.42667	0.499003	0.514956	-0.0286321	0.0611076	-0.0185561	0.082203	0.0919956
3.43	0.189752	0.251941	0.0428493	0.0680217	-0.00624283	0.129198	0.117431		3.43	0.499032	0.514305	-0.0283689	0.0606414	-0.0196206	0.0775478	0.093536
3.43333	0.190237	0.249704	0.0455446	0.0722992	-0.00886168	0.12427	0.120322		3.43333	0.492296	0.508182	-0.0277167	0.0638189	-0.0172074	0.0783933	0.089309
3.43667	0.191062	0.244892	0.0454488	0.0705748	-0.00502727	0.129758	0.11853		3.43667	0.498498	0.513099	-0.0274161	0.0631951	-0.017974	0.0775707	0.0925097
3.44	0.19316	0.25136	0.0464993	0.0690621	-0.00566925	0.126879	0.114632		3.44	0.498198	0.513678	-0.0313573	0.0645341	-0.0151807	0.0749703	0.0860838
3.44333	0.191675	0.250056	0.045492	0.0709226	-0.00759671	0.123386	0.11699		3.44333	0.497443	0.515636	-0.0296064	0.0619174	-0.0197066	0.0788912	0.0882417
3.44667	0.188283	0.252143	0.048127	0.0731967	-0.00625679	0.129921	0.117269		3.44667	0.500158	0.516052	-0.0290408	0.0635203	-0.0204327	0.0794127	0.0901007
3.45	0.191292	0.246179	0.040791	0.0722853	-0.00838442	0.124271	0.117572		3.45	0.49717	0.515282	-0.0365958	0.0634691	-0.0215217	0.078781	0.08814
3.45333	0.188594	0.249811	0.0447229	0.0717397	-0.00907621	0.130205	0.116156		3.45333	0.49744	0.514307	-0.0307598	0.0643433	-0.020504	0.0776831	0.0944642
3.45667	0.185561	0.251703	0.0454436	0.0723461	-0.00734718	0.125079	0.120965		3.45667	0.495356	0.515337	-0.0269672	0.0658173	-0.0162791	0.0772092	0.0910054
3.46	0.187091	0.254875	0.0460434	0.0714368	-0.00532699	0.124521	0.122944		3.46	0.49948	0.505942	-0.0284894	0.0614289	-0.0182313	0.0839055	0.087053
3.46333	0.193792	0.249589	0.0471157	0.0714645	-0.00868026	0.126612	0.121345		3.46333	0.49711	0.511592	-0.0321569	0.0616034	-0.0170098	0.0765647	0.0946184
3.46667	0.19112	0.247818	0.0481282	0.0697175	-0.0111005	0.125787	0.119255		3.46667	0.498911	0.516084	-0.0307493	0.0609227	-0.0205288	0.0804053	0.0914695
3.47	0.192724	0.247454	0.0451395	0.0719579	-0.00687287	0.127545	0.113787		3.47	0.499926	0.513643	-0.0312804	0.0663232	-0.0200322	0.0813691	0.0925312
3.47333	0.189062	0.250424	0.0454276	0.0704225	-0.0113929	0.125011	0.120115		3.47333	0.499256	0.515386	-0.033821	0.0673293	-0.0198355	0.0795655	0.0895456
3.47667	0.188975	0.25202	0.0475574	0.0677698	-0.00508634	0.129923	0.117935		3.47667	0.496474	0.508953	-0.0305723	0.0652272	-0.0237898	0.0790778	0.0931
3.48	0.191904	0.245364	0.0483947	0.074139	-0.00800101	0.122577	0.115463		3.48	0.497161	0.512843	-0.0306573	0.0650522	-0.0201483	0.0835532	0.0929039
3.48333	0.185743	0.250376	0.047071	0.0730139	-0.00806379	0.12955	0.117169		3.48333	0.500359	0.51032	-0.0289497	0.0628926	-0.0180547	0.0822288	0.0933988
3.48667	0.186531	0.252342	0.0433245	0.0682217	-0.00646638	0.125521	0.119496		3.48667	0.501567	0.512416	-0.0299733	0.067139	-0.0175842	0.0826019	0.0962333
3.49	0.190126	0.252573	0.0451787	0.0699785	-0.00928171	0.128716	0.117778		3.49	0.495442	0.512051	-0.0264907	0.0639406	-0.0178162	0.0799732	0.0884708
3.49333	0.190983	0.249402	0.0471036	0.071357	-0.00459466	0.132009	0.118591		3.49333	0.498964	0.508602	-0.032543	0.0614492	-0.0173557	0.0800481	0.0916734
3.49667	0.192173	0.253894	0.0491469	0.0733875	-0.00671204	0.127677	0.11478		3.49667	0.496316	0.512533	-0.0332568	0.0642627	-0.0203319	0.0737545	0.0917216
3.5	0.189393	0.249883	0.0483153	0.0731994	-0.0103004	0.130497	0.118493		3.5	0.495996	0.51219	-0.0303551	0.0656911	-0.0174683	0.0776751	0.0947881
3.50333	0.186741	0.250717	0.0500962	0.066896	-0.00680603	0.12945	0.116743		3.50333	0.496333	0.508129	-0.0320307	0.064501	-0.0188755	0.0791901	0.095918
3.50667	0.192857	0.251779	0.0470838	0.0724799	-0.00820734	0.131208	0.120118		3.50667	0.492345	0.512208	-0.0326944	0.0649766	-0.0199191	0.0812384	0.0907157
3.51	0.1878	0.248607	0.0469509	0.0702144	-0.00471106	0.128296	0.116231		3.51	0.498744	0.510456	-0.0320784	0.0635016	-0.0170863	0.0763754	0.0906642
3.51333	0.188047	0.250143	0.0450737	0.0730256	-0.0107808	0.133077	0.113965		3.51333	0.49362	0.507664	-0.029524	0.0631884	-0.0184722	0.0793519	0.093441
3.51667	0.191357	0.249277	0.0482063	0.0668842	-0.00966986	0.122243	0.123179		3.51667	0.498297	0.511694	-0.0318717	0.0605416	-0.0183277	0.0792742	0.0933812
3.52	0.190986	0.254413	0.0464661	0.0669014	-0.00496398	0.131033	0.117422		3.52	0.49524	0.508935	-0.0336337	0.0620708	-0.0157716	0.0810361	0.0907899
3.52333	0.190448	0.252472	0.0465501	0.0736815	-0.00916719	0.128976	0.124261		3.52333	0.497607	0.512365	-0.0291104	0.0581238	-0.0179523	0.0818366	0.0944514
3.52667	0.190195	0.249985	0.0457468	0.0715941	-0.00750365	0.128481	0.122217		3.52667	0.501315	0.509937	-0.0315594	0.060725	-0.0128483	0.0782479	0.0932344
3.53	0.192227	0.252051	0.0496359	0.072508	-0.00740581	0.126831	0.12392		3.53	0.4971	0.51466	-0.0320142	0.0641947	-0.0156393	0.0787245	0.0958479
3.53333	0.192362	0.250069	0.0498492	0.069853	-0.00969898	0.132063	0.118455		3.53333	0.499401	0.510336	-0.0337614	0.0638765	-0.0206276	0.0784038	0.0952893
3.53667	0.191114	0.246602	0.0444453	0.0741596	-0.00701259	0.127106	0.11847		3.53667	0.495341	0.512048	-0.0362748	0.062861	-0.017998	0.0793232	0.0937767
3.54	0.191524	0.247912	0.0493888	0.0720009	-0.0116501	0.127309	0.12097		3.54	0.502544	0.514661	-0.0340049	0.0623733	-0.0226686	0.081069	0.0938368
3.54333	0.189228	0.247715	0.0481558	0.0706156	-0.00799069	0.133023	0.116197		3.54333	0.497938	0.510486	-0.0292147	0.0633774	-0.0224706	0.0797594	0.0893969
3.54667	0.187644	0.25145	0.0442213	0.071651	-0.00726263	0.131944	0.118023		3.54667	0.494862	0.50924	-0.031984	0.057102	-0.0191383	0.0801353	0.0958892
3.55	0.193582	0.251977	0.047241	0.0739054	-0.00740111	0.132817	0.117933		3.55	0.498302	0.509152	-0.0294667	0.0640797	-0.0214469	0.0777968	0.0961564
3.55333	0.190973	0.250819	0.046843	0.0692795	-0.00889136	0.131884	0.121451		3.55333	0.499607	0.513666	-0.0274427	0.0601844	-0.0232673	0.07996	0.095744
3.55667	0.1896	0.249869	0.0462829	0.072192	-0.009932	0.125801	0.118722		3.55667	0.495293	0.507226	-0.0340017	0.0621054	-0.0174587	0.0803829	0.0959674
3.56	0.188184	0.247187	0.0442702	0.0700031	-0.00448155	0.128715	0.123132		3.56	0.499256	0.509938	-0.0302745	0.0604096	-0.0205106	0.082086	0.0960784
3.56333	0.194246	0.248012	0.0490082	0.0683345	-0.0140339	0.13173	0.117557		3.56333	0.496177	0.511752	-0.0363734	0.0632446	-0.0153558	0.0853747	0.0946616
3.56667	0.18984	0.250132	0.0474036	0.0669313	-0.0130804	0.132335	0.118413		3.56667	0.494874	0.51092	-0.0378981	0.0649106	-0.0194232	0.0811264	0.0952088
3.57	0.191803	0.250606	0.0482912	0.0737914	-0.00709361	0.12742	0.116535		3.57	0.499164	0.511461	-0.0321949	0.0581986	-0.014767	0.0811315	0.0914267
3.57333	0.188219	0.250085	0.0472756	0.0690014	-0.00901688	0.129567	0.123272		3.57333	0.498159	0.5073	-0.0345806	0.0639836	-0.0188411	0.0794602	0.0940744
3.57667	0.189544	0.249378	0.0476887	0.0720115	-0.00890554	0.131325	0.118321		3.57667	0.498359	0.510266	-0.0344193	0.0610745	-0.0158502	0.0811991	0.0953198
3.58	0.191751	0.255456	0.0482986	0.0694667	-0.00772952	0.128993	0.119946		3.58	0.497856	0.508598	-0.0313944	0.0585791	-0.0206345	0.0781189	0.0923015
3.58333	0.187727	0.247521	0.0480524	0.0707533	-0.00848912	0.128003	0.119778		3.58333	0.496293	0.507307	-0.0340112	0.060085	-0.0172955	0.0839296	0.0950401
3.58667	0.189653	0.253588	0.0417496	0.0707825	-0.0119571	0.129907	0.11838		3.58667	0.501373	0.513048	-0.0341677	0.0588285	-0.0198942	0.083674	0.0924686
3.59	0.188517	0.246229	0.0484202	0.0720549	-0.00922566	0.128243	0.117134		3.59	0.494164	0.504766	-0.0368339	0.0568028	-0.0218153	0.0798015	0.0953101
3.59333	0.188649	0.249443	0.041853	0.0694168	-0.00551448	0.133276	0.118392		3.59333	0.498044	0.51078	-0.0347304	0.0605132	-0.0196498	0.078521	0.0975495
3.59667	0.189206	0.251213	0.0471314	0.0673754	-0.00760119	0.130535	0.1226		3.59667	0.497832	0.511592	-0.0348084	0.0627329	-0.0184582	0.0816717	0.0973162
3.6	0.19057	0.248996	0.0462612	0.0746619	-0.00978742	0.132913	0.119253		3.6	0.49642	0.5115	-0.0362448	0.0573391	-0.0189015	0.0802354	0.0913537
3.60333	0.190922	0.245398	0.0474791	0.0692907	-0.00518319	0.129732	0.121154		3.60333	0.497292	0.511786	-0.0322597	0.0611968	-0.0259914	0.0805646	0.0942523
3.60667	0.192697	0.248279	0.0433578	0.0692407	-0.0119124	0.133415	0.120124		3.60667	0.494954	0.508025	-0.0347757	0.0602452	-0.0203342	0.0808121	0.0965159
3.61	0.190201	0.247513	0.0432208	0.0693555	-0.0100654	0.127806	0.118491		3.61	0.492921	0.505264	-0.033563	0.0615356	-0.0176805	0.0829564	0.0910417
3.61333	0.18923	0.249817	0.0480946	0.073676	-0.00532059	0.130455	0.125493		3.61333	0.498538	0.510872	-0.0310649	0.0593619	-0.0212401	0.0798577	0.0944746
3.61667	0.189224	0.245505	0.0488427	0.0711697	-0.00593648	0.128166	0.123456		3.61667	0.495173	0.508206	-0.0325807	0.0602071	-0.0176526	0.0793641	0.0979134
3.62	0.189843	0.251148	0.0463908	0.0708947	-0.0131882	0.132266	0.121096		3.62	0.496983	0.511551	-0.0342225	0.0596483	-0.0216987	0.0796698	0.0971782
3.62333	0.189437	0.249552	0.04755	0.072849	-0.00758404	0.128798	0.117118		3.62333	0.492794	0.509882	-0.0350826	0.0607087	-0.0210231	0.0843375	0.0909553
3.62667	0.189909	0.251005	0.0530039	0.0716048	-0.00446721	0.130732	0.12298		3.62667	0.497472	0.503626	-0.0357976	0.060409	-0.0181014	0.0855255	0.0930494
3.63	0.190276	0.253235	0.0444762	0.0674806	-0.00655054	0.128151	0.120083		3.63	0.498876	0.509784	-0.03438	0.060855	-0.0176595	0.0823437	0.0903614
3.63333	0.189941	0.253364	0.0445544	0.0699738	-0.00555991	0.129642	0.118796		3.63333	0.500672	0.50713	-0.0312396	0.0577334	-0.0220709	0.0827234	0.096183
3.63667	0.188516	0.253281	0.0399864	0.0695359	-0.0064866	0.128118	0.12311		3.63667	0.498505	0.509597	-0.0365349	0.064399	-0.021726	0.0857558	0.093507
3.64	0.190845	0.249964	0.0475004	0.0705164	-0.00481217	0.13485	0.124177		3.64	0.493805	0.50843	-0.0370201	0.0585453	-0.0227869	0.0835584	0.0927362
3.64333	0.189895	0.247457	0.0438948	0.0693419	-0.00637902	0.132599	0.126647		3.64333	0.495879	0.511125	-0.03751	0.0629697	-0.0239745	0.0827111	0.0939744
3.64667	0.189688	0.25052	0.0508642	0.0699488	-0.0114215	0.133565	0.118319		3.64667	0.495939	0.50968	-0.0369283	0.061748	-0.0177536	0.0842037	0.0937149
3.65	0.192217	0.250489	0.0479947	0.0702397	-0.00677229	0.131789	0.120779		3.65	0.495533	0.511382	-0.0377681	0.0591831	-0.018851	0.0802951	0.0936639
3.65333	0.189555	0.253931	0.0415132	0.0686528	-0.0089576	0.131	0.118774		3.65333	0.494788	0.509906	-0.0346776	0.0604235	-0.0200062	0.0808146	0.0965272
3.65667	0.193034	0.251168	0.0483001	0.0666888	-0.00739168	0.132482	0.118435		3.65667	0.497192	0.511815	-0.0366542	0.0552943	-0.0155397	0.0798648	0.0947176
3.66	0.191129	0.250749	0.0459186	0.068347	-0.010999	0.128985	0.121772		3.66	0.494793	0.511775	-0.0373537	0.0588709	-0.0200915	0.0821697	0.0928529
3.66333	0.188738	0.248227	0.0451969	0.0668762	-0.00767373	0.133637	0.118078		3.66333	0.494946	0.511524	-0.0380519	0.063969	-0.0230041	0.082129	0.0939736
3.66667	0.191054	0.253753	0.0450844	0.069399	-0.00828782	0.134946	0.122189		3.66667	0.495514	0.513028	-0.0302797	0.0604554	-0.0192577	0.0807965	0.0943521
3.67	0.188965	0.250573	0.0470812	0.0713739	-0.005369	0.132054	0.124634		3.67	0.498376	0.512531	-0.034878	0.0545202	-0.0177607	0.0796443	0.0941382
3.67333	0.194117	0.253131	0.0508766	0.0706856	-0.0110556	0.132016	0.122649		3.67333	0.498226	0.510129	-0.0341079	0.0621857	-0.0244451	0.0834072	0.0968444
3.67667	0.192034	0.251059	0.0440832	0.0729445	-0.00872535	0.129666	0.119797		3.67667	0.498459	0.508396	-0.0361981	0.0587563	-0.0235772	0.0826409	0.0938117
3.68	0.189554	0.25028	0.0438622	0.0719382	-0.00786794	0.134519	0.120458		3.68	0.49697	0.507048	-0.0305683	0.0563914	-0.0183896	0.0819731	0.0957027
3.68333	0.190202	0.249612	0.0457366	0.0732056	-0.00585962	0.135536	0.121953		3.68333	0.49293	0.504506	-0.0352778	0.0584726	-0.0221515	0.0823305	0.0973658
3.68667	0.189439	0.247578	0.0446435	0.0694247	-0.0101347	0.132887	0.123688		3.68667	0.490963	0.510143	-0.0330568	0.0587131	-0.0177056	0.0852959	0.0963117
3.69	0.191667	0.252187	0.0450774	0.0700129	-0.0131876	0.13232	0.117673		3.69	0.49714	0.511169	-0.0341366	0.0596915	-0.0215623	0.0843444	0.0927727
3.69333	0.187445	0.253003	0.0471107	0.0700935	-0.00929288	0.133602	0.12175		3.69333	0.494374	0.511353	-0.0347323	0.0628295	-0.0234132	0.0778663	0.0947082
3.69667	0.190655	0.249107	0.038869	0.0664147	-0.00888528	0.132047	0.12079		3.69667	0.496567	0.512802	-0.039254	0.0624125	-0.0172426	0.085777	0.0959384
3.7	0.19467	0.25099	0.0417977	0.0691846	-0.00688754	0.133933	0.126152		3.7	0.496791	0.507482	-0.0359385	0.0581321	-0.0149232	0.0855727	0.0976468
3.70333	0.188137	0.253267	0.0444163	0.0696383	-0.0105267	0.129403	0.121439		3.70333	0.493827	0.509362	-0.0390824	0.0546108	-0.0195803	0.0825399	0.0954516
3.70667	0.189416	0.250223	0.0435872	0.072958	-0.00734342	0.13283	0.121751		3.70667	0.493301	0.500627	-0.0309507	0.0590028	-0.0192365	0.085651	0.0964658
3.71	0.195931	0.25369	0.0430945	0.0719596	-0.00993189	0.13267	0.117686		3.71	0.495089	0.504999	-0.0401607	0.0595559	-0.0205146	0.0829461	0.0951703
3.71333	0.188136	0.250965	0.0451369	0.0671021	-0.0085618	0.135094	0.120314		3.71333	0.498029	0.508073	-0.0414555	0.0589411	-0.0198141	0.0861012	0.0974868
3.71667	0.189799	0.250126	0.0427549	0.069729	-0.0036377	0.134713	0.119415		3.71667	0.496576	0.507984	-0.0343281	0.0594349	-0.0167635	0.0811407	0.101594
3.72	0.189099	0.252066	0.0429251	0.0694438	-0.00846777	0.131504	0.116601		3.72	0.494338	0.512043	-0.0372479	0.0560876	-0.0232188	0.0828561	0.096066
3.72333	0.191848	0.251652	0.0437641	0.0698785	-0.00194995	0.129665	0.124227		3.72333	0.494161	0.506283	-0.0343193	0.0651195	-0.0226792	0.0812246	0.0973674
3.72667	0.191898	0.255709	0.0465194	0.0656314	-0.00811064	0.136402	0.120775		3.72667	0.498269	0.503844	-0.0384897	0.059539	-0.0195306	0.080743	0.0946417
3.73	0.195023	0.253779	0.045317	0.0685612	-0.0101207	0.129671	0.124762		3.73	0.496258	0.508665	-0.0388844	0.0624607	-0.0211274	0.0848348	0.0967344
3.73333	0.190612	0.250753	0.0437769	0.071521	-0.0107955	0.135301	0.120493		3.73333	0.499117	0.504284	-0.0342987	0.0586462	-0.0207593	0.0887882	0.0956467
3.73667	0.187542	0.251404	0.0447212	0.068309	-0.00931562	0.13203	0.122503		3.73667	0.494208	0.513242	-0.0367098	0.0596922	-0.0213216	0.0834748	0.0936026
3.74	0.188501	0.251346	0.0405946	0.0738878	-0.00950692	0.132577	0.120109		3.74	0.49691	0.508592	-0.0357519	0.0545513	-0.0184305	0.0795613	0.0941915
3.74333	0.192066	0.252769	0.0506913	0.0706854	-0.0106439	0.135949	0.12207		3.74333	0.496189	0.511748	-0.036628	0.0559476	-0.0180302	0.0854916	0.100719
3.74667	0.192302	0.252492	0.0444061	0.0693141	-0.0116284	0.135392	0.116383		3.74667	0.494672	0.506557	-0.0344365	0.0601261	-0.0201707	0.089387	0.0988664
3.75	0.190911	0.249928	0.0449932	0.0725401	-0.00380872	0.130965	0.122868		3.75	0.492274	0.512252	-0.0369279	0.05888	-0.0247582	0.0845854	0.0937357
3.75333	0.191662	0.251438	0.0488511	0.0711315	-0.0112796	0.132932	0.123816		3.75333	0.495432	0.503213	-0.0367181	0.0567271	-0.0177021	0.0840581	0.0927994
3.75667	0.192238	0.252113	0.0495329	0.0665795	-0.0110613	0.138272	0.120073		3.75667	0.492339	0.50562	-0.0399493	0.0539698	-0.0220832	0.0848509	0.0971618
3.76	0.190354	0.252512	0.0455872	0.0703366	-0.00948321	0.13384	0.126359		3.76	0.49782	0.507367	-0.0346738	0.0579944	-0.021882	0.0813924	0.0990681
3.76333	0.189641	0.25202	0.0464092	0.0702494	-0.0115981	0.132448	0.121121		3.76333	0.495663	0.506664	-0.0378157	0.0611781	-0.0190133	0.0844157	0.0974267
3.76667	0.192238	0.253164	0.0463235	0.072184	-0.00744526	0.134512	0.122292		3.76667	0.493093	0.505307	-0.03772	0.0616541	-0.0222227	0.0860174	0.0954176
3.77	0.191658	0.249098	0.0456341	0.0695769	-0.0129152	0.132856	0.125719		3.77	0.494895	0.504268	-0.0343844	0.0534404	-0.0213392	0.0879806	0.0976771
3.77333	0.190475	0.250598	0.0504383	0.0650965	-0.00871333	0.135404	0.122116		3.77333	0.500213	0.512523	-0.0388646	0.0564842	-0.0205034	0.0839321	0.0982648
3.77667	0.188326	0.252812	0.0440936	0.0686702	-0.012833	0.13868	0.117954		3.77667	0.495062	0.504507	-0.0395718	0.0578447	-0.0225014	0.087522	0.0974851
3.78	0.190393	0.251818	0.0438516	0.0737721	-0.0101347	0.13363	0.12292		3.78	0.494481	0.50531	-0.0364179	0.0581944	-0.0233925	0.0863663	0.0952838
3.78333	0.190473	0.252092	0.0515342	0.0657275	-0.0084939	0.136521	0.120547		3.78333	0.495169	0.507229	-0.0384905	0.0601739	-0.020559	0.0820496	0.0972292
3.78667	0.189171	0.246794	0.0465613	0.0715076	-0.0107128	0.136957	0.122033		3.78667	0.49322	0.507347	-0.0417739	0.0588752	-0.0261144	0.0792891	0.0994485
3.79	0.190156	0.248424	0.0460786	0.0715851	-0.00685614	0.131871	0.123662		3.79	0.493181	0.506628	-0.0384615	0.0584847	-0.026091	0.0846851	0.0951846
3.79333	0.191213	0.254803	0.0471464	0.0711229	-0.0100608	0.134722	0.126591		3.79333	0.497833	0.506831	-0.0324515	0.0562866	-0.0230667	0.0863791	0.098463
3.79667	0.190372	0.253025	0.0471613	0.0715394	-0.01137	0.135307	0.12383		3.79667	0.493849	0.504167	-0.0401412	0.0567658	-0.0199897	0.0836983	0.0975915
3.8	0.189926	0.255126	0.0449179	0.0678092	-0.00810633	0.135336	0.124652		3.8	0.491964	0.503586	-0.0402469	0.0556387	-0.0190268	0.0815495	0.093378
3.80333	0.187179	0.251988	0.0458225	0.0685472	-0.0116031	0.136431	0.124173		3.80333	0.495837	0.509294	-0.0377663	0.0577569	-0.0230387	0.0846095	0.0998516
3.80667	0.193072	0.247608	0.0442273	0.0694119	-0.0068008	0.137385	0.122037		3.80667	0.492662	0.507603	-0.0350372	0.0579986	-0.024599	0.0870784	0.100706
3.81	0.189119	0.250781	0.0439889	0.0689865	-0.00856884	0.135912	0.121102		3.81	0.494667	0.505871	-0.043434	0.0568596	-0.0241714	0.0854139	0.0944412
3.81333	0.191191	0.250199	0.044854	0.0686925	-0.00746468	0.1381	0.117822		3.81333	0.497886	0.506715	-0.0430922	0.0536392	-0.0239693	0.0908194	0.0944225
3.81667	0.18486	0.250434	0.0432034	0.0700332	-0.00686796	0.138619	0.123687		3.81667	0.49676	0.50413	-0.0383548	0.0558758	-0.0195497	0.0852352	0.100154
3.82	0.192804	0.249526	0.0448126	0.0703131	-0.0104157	0.136492	0.124487		3.82	0.49799	0.507744	-0.0424492	0.0599609	-0.0234307	0.0841149	0.0994416
3.82333	0.188056	0.25165	0.0475704	0.063437	-0.00774595	0.138403	0.124751		3.82333	0.499298	0.506953	-0.0378301	0.0562401	-0.0232226	0.0894125	0.0975448
3.82667	0.19049	0.251512	0.0453612	0.0696112	-0.00892749	0.133239	0.121912		3.82667	0.49326	0.508372	-0.0399048	0.0597414	-0.0197609	0.0905651	0.0968027
3.83	0.192797	0.251218	0.0446393	0.0722128	-0.00727665	0.137461	0.12147		3.83	0.493524	0.506548	-0.0423013	0.056103	-0.0223333	0.0851277	0.0982906
3.83333	0.189216	0.250948	0.0447805	0.0665323	-0.00791285	0.139821	0.126641		3.83333	0.496353	0.50631	-0.0347093	0.0577506	-0.0234991	0.0863088	0.093824
3.83667	0.194456	0.251656	0.0477098	0.0712838	-0.00483427	0.136102	0.123864		3.83667	0.494573	0.508223	-0.0402258	0.0577324	-0.0210706	0.0832771	0.0984369
3.84	0.190999	0.250578	0.0473199	0.0658788	-0.0116525	0.140444	0.125948		3.84	0.488506	0.505797	-0.0384582	0.0580062	-0.0192244	0.0833233	0.0986731
3.84333	0.190922	0.251387	0.0436376	0.0728472	-0.00627969	0.135567	0.122549		3.84333	0.49382	0.504194	-0.0408922	0.0551697	-0.0182334	0.0880962	0.094824
3.84667	0.188449	0.254541	0.0418356	0.0669377	-0.00608107	0.134398	0.124672		3.84667	0.49579	0.50718	-0.0335743	0.0546301	-0.0221769	0.0828344	0.100351
3.85	0.186368	0.251282	0.0460844	0.0677333	-0.00890468	0.135756	0.126536		3.85	0.491358	0.505778	-0.0458614	0.0617489	-0.0235995	0.0855576	0.100531
3.85333	0.182703	0.253857	0.0437466	0.0671531	-0.011831	0.135164	0.124902		3.85333	0.495412	0.503092	-0.0365657	0.0584788	-0.0225569	0.0876406	0.0992274
3.85667	0.19069	0.249874	0.0427537	0.0718909	-0.00912249	0.136304	0.12559		3.85667	0.493971	0.507922	-0.0371194	0.0568232	-0.0228699	0.0848294	0.0976284
3.86	0.189881	0.24956	0.0471769	0.0713921	-0.00900688	0.134077	0.123075		3.86	0.491638	0.507456	-0.0334449	0.0542149	-0.0207813	0.0904614	0.093833
3.86333	0.193098	0.257131	0.0457208	0.0686083	-0.00957121	0.136424	0.12126		3.86333	0.488148	0.507549	-0.0397014	0.054499	-0.0172108	0.0840202	0.0969168
3.86667	0.191071	0.253312	0.0425685	0.0661354	-0.00768478	0.136762	0.120996		3.86667	0.487156	0.504696	-0.0369498	0.0542812	-0.023319	0.0847525	0.101677
3.87	0.193791	0.252601	0.0446783	0.0685771	-0.00852555	0.136126	0.123744		3.87	0.4958	0.504873	-0.042325	0.0562102	-0.0177094	0.0863914	0.0982203
3.87333	0.187205	0.251329	0.0456602	0.068897	-0.0110782	0.134988	0.123789		3.87333	0.492188	0.508841	-0.0416334	0.0541323	-0.0207729	0.0844368	0.10159
3.87667	0.189692	0.251741	0.0422297	0.0680648	-0.01109	0.138281	0.124025		3.87667	0.491838	0.501903	-0.0461057	0.0597041	-0.0234711	0.0865209	0.0961849
3.88	0.186934	0.251522	0.0449126	0.0676898	-0.00928042	0.136613	0.121081		3.88	0.489961	0.503072	-0.039851	0.0533609	-0.0223131	0.0874208	0.0983055
3.88333	0.189261	0.249244	0.0457851	0.0730664	-0.00856651	0.139002	0.123711		3.88333	0.496036	0.506433	-0.0397913	0.0523583	-0.0214666	0.0871238	0.0977809
3.88667	0.195631	0.255449	0.0456802	0.0730092	-0.0130295	0.137699	0.12074		3.88667	0.494026	0.503028	-0.0384146	0.0599104	-0.0223905	0.084377	0.0973024
3.89	0.190168	0.251282	0.0434181	0.0664799	-0.00792211	0.135189	0.124839		3.89	0.492608	0.502881	-0.0404114	0.0552813	-0.0211449	0.0878747	0.0939771
3.89333	0.190438	0.255293	0.0450941	0.0714376	-0.00723798	0.138103	0.126047		3.89333	0.489859	0.503022	-0.0389827	0.0567638	-0.0201877	0.087531	0.101532
3.89667	0.188601	0.253163	0.0483525	0.0732994	-0.00923153	0.135927	0.126039		3.89667	0.492736	0.505148	-0.0418791	0.0547586	-0.0195458	0.0875037	0.0953851
3.9	0.190226	0.248267	0.0443089	0.0681075	-0.0105576	0.138902	0.12363		3.9	0.494717	0.504562	-0.0426043	0.0565597	-0.0211231	0.0877986	0.100728
3.90333	0.193302	0.254274	0.0460177	0.070522	-0.00876909	0.139071	0.122514		3.90333	0.490874	0.50583	-0.0402971	0.0588298	-0.02356	0.0909613	0.10241
3.90667	0.19167	0.253587	0.0429326	0.0680108	-0.0106787	0.138176	0.125696		3.90667	0.491318	0.500796	-0.0422182	0.0566646	-0.0239293	0.0870873	0.103607
3.91	0.190284	0.252587	0.0519333	0.0674167	-0.00954312	0.138432	0.124175		3.91	0.493908	0.504562	-0.0415384	0.0536865	-0.0198621	0.0884935	0.100211
3.91333	0.19221	0.256851	0.0481587	0.0688725	-0.0120813	0.137247	0.125529		3.91333	0.480512	0.504269	-0.0433706	0.0534437	-0.0191966	0.0876358	0.0977533
3.91667	0.190532	0.252456	0.048789	0.0672346	-0.00809434	0.139601	0.122569		3.91667	0.494853	0.505855	-0.0387481	0.0580809	-0.0219501	0.0877834	0.101049
3.92	0.188608	0.250106	0.0456522	0.0690091	-0.006072	0.141524	0.126112		3.92	0.492247	0.506926	-0.0432549	0.0562237	-0.0218312	0.0924725	0.102277
3.92333	0.190552	0.250179	0.0448943	0.0743368	-0.00820136	0.137765	0.124208		3.92333	0.489505	0.507443	-0.0444954	0.0534316	-0.025343	0.0873457	0.100509
3.92667	0.190235	0.254198	0.045267	0.0682408	-0.00806208	0.13636	0.128268		3.92667	0.487809	0.502272	-0.0441239	0.0545868	-0.0232192	0.091684	0.101162
3.93	0.187047	0.254346	0.0478689	0.0664442	-0.00771693	0.137633	0.127717		3.93	0.492117	0.505512	-0.0406616	0.0572899	-0.0195796	0.0883061	0.0983554
3.93333	0.194403	0.253759	0.0422236	0.0707114	-0.0104922	0.13671	0.125129		3.93333	0.488487	0.502069	-0.0412399	0.0541479	-0.0218272	0.0928916	0.102091
3.93667	0.186756	0.254374	0.0477132	0.0679539	-0.00863716	0.137852	0.123093		3.93667	0.492809	0.503576	-0.04453	0.053371	-0.0249669	0.084833	0.0998754
3.94	0.192548	0.251553	0.045074	0.0683615	-0.00700272	0.136942	0.125765		3.94	0.4922	0.507018	-0.0433702	0.053311	-0.0198142	0.0867409	0.0993699
3.94333	0.190386	0.248887	0.0473895	0.0725712	-0.0099128	0.137326	0.125512		3.94333	0.487774	0.501782	-0.0429009	0.0562582	-0.0212322	0.0838469	0.0983702
3.94667	0.193439	0.253006	0.0444239	0.0681305	-0.00933965	0.139672	0.123694		3.94667	0.490308	0.504463	-0.0439779	0.0573477	-0.0214197	0.0850325	0.102923
3.95	0.188135	0.252419	0.045323	0.0665292	-0.00660698	0.137934	0.125625		3.95	0.490547	0.500995	-0.0400132	0.0544338	-0.0217625	0.0847366	0.101816
3.95333	0.189571	0.253126	0.0412248	0.0697062	-0.00810888	0.138667	0.125755		3.95333	0.48933	0.503801	-0.0447837	0.0585729	-0.0234713	0.0894046	0.0990393
3.95667	0.190477	0.25602	0.0425586	0.066767	-0.00835535	0.141859	0.126458		3.95667	0.490586	0.50057	-0.0382667	0.0581134	-0.0163275	0.0857347	0.102388
3.96	0.192307	0.255863	0.0468605	0.069271	-0.00872855	0.144887	0.125242		3.96	0.490702	0.50737	-0.0439541	0.0502768	-0.025312	0.0891459	0.0968316
3.96333	0.190798	0.250917	0.0415309	0.073349	-0.00645356	0.138906	0.126972		3.96333	0.488685	0.501851	-0.0435638	0.0525049	-0.0194116	0.0865424	0.0999914
3.96667	0.189586	0.248959	0.0443087	0.0707889	-0.0105698	0.136201	0.128366		3.96667	0.490569	0.50347	-0.04472	0.0526237	-0.0233385	0.0856995	0.0991877
3.97	0.189594	0.253963	0.0404485	0.068628	-0.0124026	0.14316	0.124159		3.97	0.489849	0.500706	-0.0428603	0.053535	-0.0203684	0.0894862	0.10124
3.97333	0.189466	0.254928	0.0497482	0.0718683	-0.00968685	0.137264	0.130132		3.97333	0.491222	0.499114	-0.0398726	0.0561541	-0.0252321	0.0900304	0.100442
3.97667	0.189673	0.253393	0.0436595	0.0681291	-0.0109516	0.137547	0.126628		3.97667	0.493814	0.500129	-0.040537	0.0534099	-0.0218563	0.0908531	0.0977439
3.98	0.193963	0.254598	0.043573	0.0668007	-0.00989368	0.137457	0.125357		3.98	0.490765	0.5026	-0.0442629	0.0529735	-0.0219548	0.0860155	0.104397
3.98333	0.191216	0.252492	0.0445016	0.0721997	-0.0117646	0.140079	0.124961		3.98333	0.488314	0.503965	-0.0375938	0.0578507	-0.0202067	0.0920738	0.100824
3.98667	0.194281	0.251416	0.0442942	0.0704206	-0.00540516	0.138147	0.125008		3.98667	0.489154	0.510059	-0.0437984	0.0541263	-0.0202574	0.0897321	0.100477
3.99	0.186663	0.249415	0.0442186	0.0710168	-0.00930356	0.139407	0.127356		3.99	0.487537	0.506074	-0.041354	0.0543016	-0.024869	0.0880285	0.104869
3.99333	0.185948	0.251618	0.0441595	0.0650148	-0.00422841	0.141089	0.128803		3.99333	0.48985	0.505164	-0.0392311	0.0593383	-0.0224509	0.0879042	0.101026
3.99667	0.190943	0.25348	0.0474916	0.0712951	-0.0112457	0.138521	0.126746		3.99667	0.490672	0.504324	-0.0408946	0.0563281	-0.024714	0.0898649	0.0995531
4	0.190299	0.251529	0.0457661	0.0683686	-0.00830893	0.139278	0.127377		4	0.49152	0.501858	-0.0446894	0.0520103	-0.019343	0.0924654	0.100605
4.00333	0.190481	0.253843	0.0448261	0.0686881	-0.0118841	0.138055	0.126874		4.00333	0.495894	0.506054	-0.0433801	0.0543559	-0.0264047	0.0857757	0.103817
4.00667	0.18688	0.254921	0.045647	0.069938	-0.00808829	0.139289	0.124807		4.00667	0.492537	0.504844	-0.0409372	0.055685	-0.0223077	0.0946138	0.102329
4.01	0.189716	0.252729	0.045425	0.0696976	-0.00844732	0.13641	0.124281		4.01	0.489387	0.503824	-0.0402882	0.0544572	-0.020766	0.0885085	0.101357
4.01333	0.190382	0.253971	0.0442741	0.0698465	-0.00969682	0.142052	0.125354		4.01333	0.489042	0.502171	-0.0435022	0.0524804	-0.0212546	0.0911167	0.10107
4.01667	0.190052	0.252479	0.0445149	0.0682771	-0.0111124	0.141349	0.126024		4.01667	0.491164	0.500754	-0.0427036	0.0514247	-0.0207845	0.0881599	0.101686
4.02	0.1909	0.260996	0.0475023	0.0657555	-0.00763668	0.142295	0.123599		4.02	0.490216	0.503373	-0.0473123	0.0590081	-0.0207254	0.0875068	0.0993738
4.02333	0.188801	0.252461	0.046793	0.0696986	-0.00653086	0.143772	0.128991		4.02333	0.491518	0.503071	-0.0433442	0.0551057	-0.0223578	0.0903768	0.102775
4.02667	0.191819	0.252396	0.0414802	0.067125	-0.00813969	0.140281	0.126242		4.02667	0.489854	0.503704	-0.04067	0.051869	-0.0202809	0.0889836	0.100178
4.03	0.192594	0.249133	0.0444482	0.0701345	-0.0118451	0.14222	0.122403		4.03	0.493282	0.496384	-0.04493	0.0518597	-0.0180257	0.0887708	0.103377
4.03333	0.190682	0.252312	0.0448475	0.0718632	-0.00835802	0.140059	0.125051		4.03333	0.493803	0.505418	-0.0439334	0.0492095	-0.0182284	0.0859289	0.099167
4.03667	0.187419	0.25092	0.0406982	0.0677678	-0.00899574	0.138302	0.128919		4.03667	0.494618	0.502412	-0.0453285	0.0524346	-0.024459	0.0875294	0.097819
4.04	0.189623	0.252145	0.0466969	0.0709017	-0.0168118	0.138995	0.124356		4.04	0.490218	0.501778	-0.0432203	0.0534799	-0.0243367	0.0931733	0.105754
4.04333	0.188493	0.250087	0.042714	0.0668331	-0.00991339	0.140857	0.126353		4.04333	0.490696	0.499871	-0.0430856	0.0544297	-0.0240471	0.086334	0.105008
4.04667	0.189965	0.251989	0.0433374	0.0689482	-0.00578956	0.140376	0.127477		4.04667	0.486784	0.505504	-0.0419806	0.0547914	-0.0230528	0.0877731	0.100746
4.05	0.187472	0.254791	0.0430812	0.0725036	-0.00810319	0.139719	0.127863		4.05	0.489972	0.498023	-0.0469888	0.0532963	-0.0212277	0.0888686	0.100507
4.05333	0.195242	0.250573	0.0420018	0.0697885	-0.00951491	0.141798	0.125673		4.05333	0.490515	0.498939	-0.0458657	0.0539656	-0.0235661	0.092479	0.103564
4.05667	0.190335	0.255524	0.0469623	0.0702859	-0.0117826	0.139581	0.12437		4.05667	0.49447	0.500553	-0.0414988	0.0548358	-0.0259059	0.090362	0.102588
4.06	0.188214	0.252722	0.0411979	0.071665	-0.00960025	0.143535	0.12785		4.06	0.492656	0.497612	-0.0500414	0.0513448	-0.0230736	0.0925578	0.10235
4.06333	0.190266	0.254892	0.0445841	0.0707086	-0.00955404	0.142716	0.127139		4.06333	0.492945	0.498572	-0.0471184	0.0579676	-0.0182012	0.0893041	0.102674
4.06667	0.185262	0.255493	0.0439493	0.0716576	-0.00641845	0.139257	0.122713		4.06667	0.490947	0.503963	-0.0436481	0.0540362	-0.0228401	0.0909063	0.101741
4.07	0.187483	0.250195	0.0434096	0.0678169	-0.00922881	0.141707	0.120476		4.07	0.490566	0.5038	-0.0486921	0.0527446	-0.020685	0.0921183	0.102273
4.07333	0.191879	0.256022	0.046088	0.0684767	-0.0114457	0.13565	0.125607		4.07333	0.484607	0.498706	-0.0442167	0.0452901	-0.0180214	0.091166	0.0994962
4.07667	0.189042	0.251063	0.0490041	0.0686124	-0.00777325	0.142348	0.127815		4.07667	0.487855	0.502315	-0.0481536	0.0545914	-0.0191544	0.0871046	0.106435
4.08	0.190433	0.256302	0.0448836	0.0683982	-0.010046	0.140475	0.124062		4.08	0.485064	0.50032	-0.0440666	0.0515339	-0.0200025	0.0896991	0.102674
4.08333	0.191659	0.253609	0.0411603	0.0695281	-0.0122668	0.141614	0.129545		4.08333	0.488147	0.497294	-0.0477853	0.0549617	-0.0237844	0.0944232	0.103999
4.08667	0.189554	0.250672	0.0396637	0.0707045	-0.010037	0.141658	0.125711		4.08667	0.48871	0.50292	-0.0419383	0.0543213	-0.0283695	0.092817	0.101055
4.09	0.189711	0.251936	0.0412152	0.0683002	-0.00903573	0.14073	0.128278		4.09	0.492663	0.501716	-0.0447486	0.0499948	-0.0240825	0.0915843	0.0998198
4.09333	0.192008	0.251688	0.0428781	0.0678897	-0.00845599	0.145268	0.125039		4.09333	0.488062	0.502971	-0.0485473	0.054173	-0.0220136	0.0897993	0.10411
4.09667	0.189456	0.248049	0.043841	0.07141	-0.0112115	0.141939	0.127158		4.09667	0.491745	0.503486	-0.0438813	0.0555209	-0.0237922	0.0909501	0.0970837
4.1	0.18857	0.251135	0.0429573	0.0669599	-0.0109569	0.143326	0.124967		4.1	0.491227	0.49912	-0.0457185	0.0519351	-0.0189631	0.0959077	0.10039
4.10333	0.192376	0.254959	0.0442483	0.0723764	-0.00704491	0.139909	0.123513		4.10333	0.489645	0.500218	-0.0452456	0.0535566	-0.0238658	0.0969885	0.103989
4.10667	0.188988	0.25191	0.0432752	0.0719569	-0.00893637	0.141053	0.134539		4.10667	0.488016	0.497472	-0.0448963	0.0550627	-0.0241097	0.0916977	0.102475
4.11	0.192863	0.253934	0.0443687	0.0721917	-0.0131021	0.147188	0.125172		4.11	0.485563	0.498755	-0.0486444	0.0574209	-0.0207031	0.0932726	0.104721
4.11333	0.190343	0.252271	0.0444183	0.0696717	-0.00378964	0.143259	0.127717		4.11333	0.489557	0.499559	-0.0461065	0.0481161	-0.0188794	0.0910959	0.104707
4.11667	0.188133	0.251622	0.0439659	0.0668891	-0.0120432	0.140585	0.129374		4.11667	0.486437	0.496302	-0.0432643	0.0482269	-0.0241946	0.0926264	0.107128
4.12	0.19083	0.251684	0.0416286	0.0669394	-0.00794487	0.141869	0.12927		4.12	0.491642	0.501821	-0.0459381	0.0531861	-0.0213107	0.0928875	0.101749
4.12333	0.191356	0.253174	0.0451898	0.0708318	-0.00797791	0.141707	0.129916		4.12333	0.483895	0.504123	-0.0467973	0.0500088	-0.0229741	0.0946734	0.105221
4.12667	0.188103	0.247652	0.0375554	0.0690758	-0.00931823	0.143883	0.128039		4.12667	0.488309	0.501651	-0.0438785	0.0544076	-0.0211947	0.0944659	0.101777
4.13	0.187044	0.25182	0.0410274	0.0731987	-0.0107527	0.143087	0.126777		4.13	0.490144	0.49928	-0.0442303	0.0530775	-0.018555	0.0914237	0.0980482
4.13333	0.193073	0.257917	0.0400486	0.074529	-0.0100793	0.143959	0.129063		4.13333	0.481802	0.494188	-0.0487393	0.0529814	-0.0194611	0.0884161	0.10123
4.13667	0.193166	0.254776	0.0462371	0.0677746	-0.0101276	0.139029	0.126502		4.13667	0.488267	0.494812	-0.044825	0.0530907	-0.0185466	0.0913745	0.103996
4.14	0.188916	0.248362	0.0391708	0.0727139	-0.00985658	0.143391	0.124365		4.14	0.487987	0.500376	-0.0438153	0.0476499	-0.0229111	0.0928472	0.104428
4.14333	0.188399	0.255241	0.0443993	0.0708005	-0.0101262	0.145675	0.128896		4.14333	0.489421	0.505244	-0.0454939	0.0498209	-0.0221292	0.0910863	0.102296
4.14667	0.185934	0.2514	0.0471505	0.0699064	-0.0151053	0.143884	0.137507		4.14667	0.489619	0.50306	-0.0459291	0.0490156	-0.022262	0.0947222	0.10215
4.15	0.192262	0.253995	0.041728	0.0683534	-0.008076	0.145157	0.126724		4.15	0.491817	0.504584	-0.0460735	0.0508132	-0.0204272	0.0900107	0.104076
4.15333	0.187462	0.253177	0.0393591	0.0724004	-0.00754174	0.139416	0.12553		4.15333	0.485762	0.495746	-0.0466997	0.0509442	-0.024086	0.0917775	0.105228
4.15667	0.188811	0.252442	0.0444426	0.0691694	-0.0125874	0.143573	0.131209		4.15667	0.487994	0.497017	-0.043837	0.0498412	-0.0180539	0.0890651	0.105733
4.16	0.188022	0.248237	0.0401976	0.0677014	-0.00941024	0.143703	0.126473		4.16	0.489423	0.49831	-0.0432806	0.0547979	-0.0207771	0.0883247	0.103546
4.16333	0.190401	0.255537	0.0436069	0.0698016	-0.0115639	0.146574	0.12706		4.16333	0.486659	0.498846	-0.0519062	0.0493925	-0.0262805	0.0914333	0.101728
4.16667	0.189327	0.255264	0.0460579	0.0709266	-0.00912919	0.139468	0.129241		4.16667	0.484441	0.502403	-0.0498816	0.0492933	-0.0234288	0.0909714	0.102268
4.17	0.189316	0.251953	0.0433482	0.0716787	-0.0107663	0.1454	0.128465		4.17	0.48749	0.502804	-0.0414414	0.0519319	-0.0214981	0.0933899	0.105313
4.17333	0.189867	0.249823	0.0451609	0.0689926	-0.0107762	0.141332	0.126282		4.17333	0.491371	0.495691	-0.0471198	0.048464	-0.0262276	0.0945151	0.104462
4.17667	0.189586	0.252087	0.0426751	0.0669506	-0.0108619	0.140205	0.127428		4.17667	0.486885	0.496401	-0.0451029	0.0499585	-0.0200611	0.0936916	0.10325
4.18	0.183438	0.25613	0.0433558	0.0726279	-0.0130067	0.142131	0.127913		4.18	0.489298	0.498704	-0.0440193	0.0455083	-0.0214159	0.0875513	0.102995
4.18333	0.190091	0.256713	0.0426519	0.0717694	-0.0109775	0.143165	0.12956		4.18333	0.486517	0.500671	-0.0456901	0.0500961	-0.0229306	0.0900375	0.100481
4.18667	0.191923	0.258303	0.0413572	0.0678894	-0.00917685	0.143956	0.124684		4.18667	0.48413	0.495448	-0.0493884	0.048066	-0.0183249	0.0913834	0.104433
4.19	0.192561	0.255033	0.0436479	0.0703692	-0.0101775	0.143506	0.128715		4.19	0.484634	0.495904	-0.0496457	0.0532689	-0.0231932	0.0913955	0.104595
4.19333	0.187521	0.252319	0.044504	0.067386	-0.0082595	0.142095	0.128978		4.19333	0.487754	0.498966	-0.0473127	0.053059	-0.0204801	0.0934373	0.102636
4.19667	0.18682	0.256589	0.042103	0.0700024	-0.0134653	0.141304	0.127592		4.19667	0.487141	0.49854	-0.049741	0.0499742	-0.0226141	0.0917995	0.105269
4.2	0.191193	0.254271	0.0414078	0.0646107	-0.0134276	0.145231	0.133552		4.2	0.489402	0.497449	-0.0448929	0.0463863	-0.0220133	0.0908417	0.100451
4.20333	0.188623	0.251644	0.0441786	0.0681809	-0.0108762	0.140102	0.131451		4.20333	0.488835	0.496831	-0.0446745	0.0471745	-0.0220593	0.0951175	0.105818
4.20667	0.186864	0.253363	0.0402681	0.0706471	-0.00889615	0.141744	0.129777		4.20667	0.486256	0.499121	-0.0471677	0.0544244	-0.0201829	0.0930375	0.10451
4.21	0.187828	0.254694	0.044102	0.0651683	-0.0155339	0.147074	0.12777		4.21	0.487437	0.49363	-0.0506214	0.0491663	-0.0218837	0.0923549	0.10332
4.21333	0.190542	0.254906	0.0459305	0.0677119	-0.00839895	0.144321	0.128255		4.21333	0.487901	0.494923	-0.0462435	0.0488982	-0.0197489	0.0930842	0.103771
4.21667	0.183371	0.255333	0.044129	0.0684362	-0.00988108	0.145409	0.130353		4.21667	0.485915	0.500055	-0.0472759	0.0523446	-0.0212381	0.0923788	0.106836
4.22	0.189392	0.253769	0.0417251	0.0693318	-0.0141817	0.144019	0.127556		4.22	0.485155	0.497175	-0.0457852	0.0505096	-0.0219333	0.0925593	0.108564
4.22333	0.18824	0.255545	0.0427381	0.0686748	-0.0111097	0.145194	0.126992		4.22333	0.486635	0.496677	-0.0478816	0.0555198	-0.0199944	0.0948125	0.104166
4.22667	0.191193	0.25435	0.0436492	0.0729299	-0.00999511	0.145413	0.127297		4.22667	0.487631	0.498839	-0.0467324	0.0467701	-0.0255344	0.0931426	0.1033
4.23	0.190819	0.254362	0.0458312	0.0676802	-0.0117877	0.142898	0.129135		4.23	0.491148	0.49879	-0.048012	0.0491763	-0.0215933	0.0912224	0.103914
4.23333	0.19131	0.252672	0.044631	0.0678139	-0.00816942	0.145902	0.124853		4.23333	0.487115	0.492348	-0.0467541	0.0523651	-0.0249571	0.0954403	0.104798
4.23667	0.188347	0.25391	0.0444101	0.0682001	-0.00967294	0.146648	0.134897		4.23667	0.484876	0.495194	-0.0496036	0.0506779	-0.0241772	0.0921491	0.107836
4.24	0.192726	0.253696	0.043437	0.0726248	-0.0138777	0.143337	0.132802		4.24	0.484475	0.499657	-0.0493423	0.048959	-0.0189343	0.0940238	0.106301
4.24333	0.195077	0.252181	0.0431828	0.0677907	-0.0113795	0.146488	0.125319		4.24333	0.48676	0.494669	-0.0466657	0.0480407	-0.0247998	0.0932929	0.101535
4.24667	0.192193	0.248756	0.0401546	0.070038	-0.0141308	0.147509	0.132584		4.24667	0.489286	0.493615	-0.0478036	0.0520997	-0.0228923	0.0955551	0.103771
4.25	0.191724	0.253125	0.041162	0.0681612	-0.0120501	0.145154	0.129924		4.25	0.488273	0.492796	-0.0427279	0.0491756	-0.0193029	0.0973447	0.10637
4.25333	0.188585	0.25404	0.0416566	0.0698175	-0.0104967	0.144375	0.131927		4.25333	0.488037	0.499335	-0.04694	0.0514827	-0.0205711	0.094187	0.101078
4.25667	0.188602	0.252995	0.0476265	0.0672269	-0.00856334	0.145754	0.128051		4.25667	0.488288	0.497936	-0.0495975	0.0487701	-0.0272059	0.0924279	0.0972104
4.26	0.189697	0.254255	0.0476314	0.0699472	-0.0145666	0.14493	0.128258		4.26	0.488152	0.496224	-0.053282	0.0480115	-0.0214575	0.0911154	0.108522
4.26333	0.189681	0.252479	0.0396142	0.0676987	-0.00571733	0.150941	0.131001		4.26333	0.483246	0.497722	-0.0443465	0.0529294	-0.0180647	0.0899397	0.103858
4.26667	0.189757	0.254362	0.048947	0.0682631	-0.00907721	0.144427	0.132654		4.26667	0.48417	0.497218	-0.0461651	0.0485669	-0.0219588	0.0926963	0.107177
4.27	0.191314	0.254056	0.0415128	0.0710355	-0.0118382	0.149762	0.12675		4.27	0.484545	0.497022	-0.0499757	0.0457134	-0.0255619	0.0933761	0.103031
4.27333	0.189226	0.254235	0.0456565	0.0728412	-0.0144429	0.147721	0.128967		4.27333	0.488237	0.496477	-0.0515293	0.0496109	-0.0205864	0.0974498	0.104537
4.27667	0.191734	0.25527	0.0427235	0.0642836	-0.0107146	0.146836	0.13571		4.27667	0.488812	0.498696	-0.049149	0.046793	-0.0219833	0.0934128	0.103417
4.28	0.188689	0.253644	0.0444293	0.0664081	-0.0123866	0.144657	0.131696		4.28	0.486872	0.496547	-0.0502903	0.0500583	-0.0205257	0.089862	0.102464
4.28333	0.191011	0.251171	0.0440656	0.065105	-0.00985344	0.144778	0.129701		4.28333	0.483989	0.496227	-0.0549349	0.0509288	-0.0217012	0.094398	0.104832
4.28667	0.191246	0.253028	0.0435967	0.0724285	-0.00839254	0.146773	0.130864		4.28667	0.488495	0.493225	-0.0454793	0.0476724	-0.0251074	0.092238	0.104789
4.29	0.189216	0.258411	0.0436083	0.0678537	-0.0117693	0.143061	0.129566		4.29	0.486531	0.495202	-0.0472393	0.0495232	-0.0218155	0.0926636	0.106776
4.29333	0.190933	0.254884	0.041859	0.0669754	-0.0129466	0.14968	0.133669		4.29333	0.485107	0.493753	-0.0519124	0.0507495	-0.0203154	0.0942744	0.105875
4.29667	0.190492	0.253758	0.0489734	0.0701076	-0.011695	0.148442	0.127552		4.29667	0.486241	0.497408	-0.0480629	0.0538444	-0.0221663	0.0943127	0.107748
4.3	0.190052	0.251399	0.0469756	0.0651915	-0.010697	0.146086	0.126617		4.3	0.484591	0.497176	-0.0490807	0.0461427	-0.022821	0.0941258	0.105368
4.30333	0.190009	0.253462	0.0442653	0.0669608	-0.0142371	0.143749	0.133923		4.30333	0.487514	0.493967	-0.0524101	0.0457995	-0.0214791	0.0971516	0.107453
4.30667	0.189664	0.251965	0.0470237	0.0705084	-0.0115379	0.144494	0.134388		4.30667	0.486225	0.499548	-0.0552303	0.0479638	-0.0258922	0.0938653	0.110051
4.31	0.19013	0.256804	0.0469228	0.0658167	-0.00785898	0.148825	0.124479		4.31	0.483625	0.49251	-0.0511337	0.048251	-0.024982	0.0963061	0.101824
4.31333	0.190799	0.253282	0.0473381	0.0662496	-0.0155574	0.142359	0.131794		4.31333	0.480486	0.494399	-0.047633	0.050516	-0.0221295	0.0908644	0.105589
4.31667	0.189578	0.255304	0.0431817	0.0738311	-0.00734394	0.147122	0.130217		4.31667	0.483291	0.496786	-0.0500993	0.0492324	-0.0228261	0.0893588	0.104312
4.32	0.191179	0.257261	0.0449952	0.0695161	-0.0131615	0.142511	0.131741		4.32	0.488173	0.494249	-0.047844	0.0457585	-0.0221663	0.0949374	0.101849
4.32333	0.19003	0.255845	0.037511	0.0692002	-0.011301	0.148574	0.132109		4.32333	0.486028	0.495555	-0.0507477	0.0472614	-0.018938	0.0903972	0.105505
4.32667	0.18732	0.257018	0.0468886	0.0671163	-0.00748516	0.148236	0.131919		4.32667	0.48445	0.496163	-0.0513516	0.0404882	-0.0271712	0.0931984	0.108614
4.33	0.191639	0.254811	0.0464238	0.0705054	-0.00627178	0.147386	0.132088		4.33	0.485403	0.496018	-0.0495014	0.0483249	-0.022979	0.0956977	0.103097
4.33333	0.184471	0.251786	0.0419425	0.0681488	-0.0136141	0.151401	0.131		4.33333	0.481956	0.493881	-0.0478695	0.0469697	-0.0204934	0.0910471	0.107402
4.33667	0.189858	0.253679	0.0468213	0.0674718	-0.0110226	0.149184	0.126954		4.33667	0.482105	0.494901	-0.0535856	0.0474801	-0.0204181	0.092036	0.107077
4.34	0.191208	0.255755	0.042367	0.0669428	-0.0113166	0.147924	0.129426		4.34	0.484856	0.492868	-0.0492504	0.0453229	-0.024348	0.0956707	0.107828
4.34333	0.188487	0.253751	0.0399686	0.0692406	-0.0120427	0.149103	0.128734		4.34333	0.48147	0.491349	-0.0546925	0.0496317	-0.0206015	0.0942502	0.105896
4.34667	0.191208	0.253577	0.0390944	0.071209	-0.0157454	0.145864	0.130822		4.34667	0.482537	0.500047	-0.0508431	0.0495661	-0.0231667	0.091419	0.107465
4.35	0.187224	0.25545	0.0398034	0.0649127	-0.0100063	0.151203	0.130908		4.35	0.484516	0.497368	-0.0517738	0.0453322	-0.0218206	0.0965405	0.106718
4.35333	0.189608	0.253746	0.0412136	0.068496	-0.0124446	0.148148	0.129862		4.35333	0.485774	0.488198	-0.0533172	0.0498525	-0.0201026	0.0962311	0.108971
4.35667	0.188005	0.254693	0.0402549	0.0669114	-0.0152694	0.148158	0.128174		4.35667	0.485567	0.497112	-0.0503125	0.0493364	-0.0201892	0.0962705	0.109385
4.36	0.191307	0.252636	0.0458581	0.0671188	-0.00965784	0.150481	0.129295		4.36	0.484031	0.493811	-0.0504002	0.0499607	-0.0262198	0.0954165	0.106309
4.36333	0.184908	0.25343	0.039466	0.0705167	-0.0108187	0.14963	0.132128		4.36333	0.482551	0.488943	-0.0514732	0.048722	-0.0177677	0.0997292	0.10645
4.36667	0.186793	0.253372	0.0462743	0.0703221	-0.00963005	0.146944	0.127161		4.36667	0.483985	0.495066	-0.0502031	0.0476863	-0.0245432	0.0955955	0.108156
4.37	0.189831	0.253141	0.0463516	0.0720045	-0.0113385	0.147369	0.130521		4.37	0.482979	0.496013	-0.0496826	0.0490568	-0.0213511	0.0938344	0.106355
4.37333	0.189662	0.25388	0.0433849	0.0661799	-0.0128333	0.146484	0.1299		4.37333	0.480965	0.493909	-0.0528144	0.0469155	-0.0247818	0.098575	0.110139
4.37667	0.192504	0.251905	0.0421933	0.0704138	-0.0106101	0.145983	0.13588		4.37667	0.487294	0.492867	-0.054434	0.0509714	-0.0233135	0.0937143	0.106962
4.38	0.189869	0.254144	0.0423304	0.0663173	-0.0118915	0.151445	0.132469		4.38	0.483213	0.494956	-0.0491912	0.045803	-0.0241741	0.100202	0.107364
4.38333	0.189339	0.253816	0.0387174	0.0654438	-0.0142396	0.148166	0.133349		4.38333	0.479553	0.492364	-0.0564811	0.0452001	-0.0244642	0.0968304	0.110888
4.38667	0.188406	0.254884	0.0419834	0.0688044	-0.0114179	0.146151	0.13272		4.38667	0.4875	0.493202	-0.0517766	0.048126	-0.0232158	0.0931616	0.108114
4.39	0.186565	0.254349	0.0399772	0.0690499	-0.00982211	0.14835	0.135947		4.39	0.483617	0.493992	-0.0492614	0.0441102	-0.0214421	0.0986054	0.106216
4.39333	0.192912	0.252894	0.0428194	0.0664583	-0.0110521	0.148633	0.1248		4.39333	0.487742	0.495585	-0.0508864	0.0408372	-0.0253534	0.0966662	0.107244
4.39667	0.190355	0.257006	0.0422242	0.0718324	-0.0137417	0.149968	0.13283		4.39667	0.48216	0.495643	-0.0473434	0.0479318	-0.0226302	0.0947138	0.106846
4.4	0.190561	0.250434	0.0423961	0.0681113	-0.00714991	0.150597	0.132794		4.4	0.48309	0.495079	-0.0529839	0.0490782	-0.0232952	0.0991926	0.105752
4.40333	0.190343	0.251531	0.0464122	0.0694752	-0.0108532	0.146847	0.131763		4.40333	0.483369	0.496121	-0.0555092	0.0499045	-0.0238531	0.0977071	0.103769
4.40667	0.188486	0.255852	0.0419794	0.0658678	-0.0133471	0.153844	0.136171		4.40667	0.481392	0.491994	-0.0556519	0.0472249	-0.0217265	0.0918759	0.103041
4.41	0.191455	0.252802	0.0401665	0.0674482	-0.013552	0.150688	0.131874		4.41	0.486347	0.492909	-0.0507557	0.0467905	-0.0268554	0.0995953	0.107816
4.41333	0.190468	0.254994	0.044763	0.0708492	-0.00986212	0.149559	0.132714		4.41333	0.483447	0.491303	-0.0533369	0.045203	-0.0222777	0.0956062	0.109095
4.41667	0.193581	0.253079	0.041688	0.0642034	-0.0112038	0.149396	0.134663		4.41667	0.482127	0.496118	-0.0512691	0.0452871	-0.0199192	0.0961173	0.10795
4.42	0.187227	0.251471	0.0403485	0.0681173	-0.0118175	0.153312	0.128449		4.42	0.484988	0.494751	-0.0532706	0.0461284	-0.0241777	0.0978091	0.106029
4.42333	0.187743	0.254849	0.0434821	0.0722498	-0.0123139	0.15357	0.133145		4.42333	0.485143	0.487143	-0.051396	0.0459155	-0.0219534	0.0972117	0.106571
4.42667	0.188195	0.257002	0.0458684	0.0661958	-0.0142131	0.148002	0.132467		4.42667	0.483248	0.492636	-0.0526331	0.047024	-0.0225902	0.0983894	0.105499
4.43	0.193124	0.250674	0.0383666	0.0666482	-0.0108113	0.147819	0.134844		4.43	0.483048	0.494509	-0.0511547	0.0446517	-0.0242913	0.0985692	0.106419
4.43333	0.188513	0.255668	0.0457939	0.0676531	-0.0152838	0.150612	0.130651		4.43333	0.481093	0.491565	-0.0557128	0.0492864	-0.0220438	0.0964759	0.105663
4.43667	0.193041	0.252538	0.0419719	0.0699069	-0.00806278	0.150258	0.133546		4.43667	0.483613	0.487918	-0.0553803	0.0433739	-0.0231407	0.095435	0.109285
4.44	0.189154	0.255113	0.0407717	0.0689667	-0.0119788	0.147605	0.131854		4.44	0.481958	0.495499	-0.0503376	0.0453053	-0.0212423	0.0943943	0.108476
4.44333	0.190239	0.253595	0.0449811	0.0626853	-0.0128748	0.150621	0.131953		4.44333	0.483033	0.492546	-0.0501443	0.0464496	-0.0263857	0.100645	0.106823
4.44667	0.192126	0.255473	0.0455497	0.0643169	-0.00853649	0.147817	0.132987		4.44667	0.479624	0.491248	-0.0559619	0.04811	-0.0216061	0.0978032	0.11157
4.45	0.191569	0.255006	0.0423319	0.0691518	-0.0118154	0.15217	0.129781		4.45	0.483961	0.488467	-0.0563095	0.0468978	-0.0214878	0.0972727	0.109515
4.45333	0.18868	0.25424	0.0427271	0.0668716	-0.0130281	0.14943	0.132256		4.45333	0.482342	0.490847	-0.0533113	0.0478673	-0.0209421	0.0974731	0.109913
4.45667	0.189756	0.255725	0.0419998	0.0695783	-0.0100045	0.149132	0.134198		4.45667	0.484356	0.487417	-0.053561	0.0480505	-0.0239734	0.0950379	0.106893
4.46	0.19074	0.254915	0.0432884	0.0695907	-0.010367	0.153841	0.132008		4.46	0.480063	0.492013	-0.0508239	0.0441137	-0.0206216	0.0953036	0.110851
4.46333	0.192628	0.252117	0.0401757	0.0659485	-0.00891667	0.151166	0.133632		4.46333	0.48266	0.490173	-0.0504837	0.0436233	-0.0208005	0.097336	0.110209
4.46667	0.187716	0.252263	0.0432736	0.0771219	-0.00975124	0.148925	0.130125		4.46667	0.478442	0.490977	-0.0527222	0.0438579	-0.0206854	0.100174	0.107384
4.47	0.188837	0.251375	0.0440461	0.0657681	-0.00687995	0.148087	0.131594		4.47	0.476354	0.494343	-0.0537825	0.0450439	-0.0214426	0.0906116	0.109782
4.47333	0.18752	0.250598	0.0437601	0.0705384	-0.007218	0.147805	0.132659		4.47333	0.482324	0.493557	-0.0519462	0.0436358	-0.0224739	0.101144	0.108327
4.47667	0.189777	0.253159	0.0437635	0.0667608	-0.013176	0.146441	0.130458		4.47667	0.479364	0.495292	-0.0506278	0.0456088	-0.0207724	0.0951659	0.109265
4.48	0.191982	0.252793	0.04726	0.0672029	-0.0139672	0.150845	0.134833		4.48	0.48159	0.493923	-0.0569526	0.0485639	-0.0247892	0.0943152	0.107636
4.48333	0.188794	0.255459	0.0418966	0.0670406	-0.013213	0.152502	0.127502		4.48333	0.480885	0.492337	-0.0545547	0.0454481	-0.022284	0.0970918	0.109976
4.48667	0.188885	0.256297	0.044485	0.0686	-0.00594769	0.150805	0.132819		4.48667	0.486016	0.489219	-0.0533898	0.0417863	-0.0265548	0.0907037	0.111859
4.49	0.187719	0.252471	0.0429939	0.066975	-0.00980195	0.154492	0.130685		4.49	0.476267	0.491309	-0.0540802	0.0478234	-0.0245867	0.0959462	0.111448
4.49333	0.190909	0.254795	0.0423186	0.0686316	-0.00935773	0.151953	0.136186		4.49333	0.481014	0.494273	-0.0538954	0.0409731	-0.025375	0.0994647	0.109631
4.49667	0.188214	0.255335	0.0432979	0.0657166	-0.00883357	0.152986	0.134056		4.49667	0.483789	0.494414	-0.0503474	0.0476202	-0.0213959	0.095207	0.11093
4.5	0.185945	0.255208	0.0464098	0.0668773	-0.0131596	0.147657	0.133426		4.5	0.484002	0.493026	-0.0577295	0.0408028	-0.0247259	0.0939294	0.107118
4.50333	0.189616	0.256886	0.0420087	0.0681114	-0.0194297	0.154657	0.136449		4.50333	0.47883	0.49273	-0.0569246	0.0471969	-0.0228915	0.0974039	0.111311
4.50667	0.192731	0.251641	0.0478866	0.0666695	-0.0104563	0.152046	0.129068		4.50667	0.482873	0.492912	-0.0558808	0.0448255	-0.025042	0.0973662	0.107841
4.51	0.184792	0.253015	0.0446281	0.0661149	-0.0101053	0.151343	0.131447		4.51	0.481222	0.493254	-0.0558576	0.0421875	-0.0263414	0.0972307	0.106865
4.51333	0.189284	0.253256	0.041516	0.0680131	-0.0141865	0.14781	0.130931		4.51333	0.479175	0.489702	-0.054118	0.041972	-0.0195406	0.0987882	0.106016
4.51667	0.190719	0.25588	0.0428065	0.068169	-0.0109457	0.15414	0.132939		4.51667	0.481725	0.492791	-0.052169	0.0453497	-0.0229497	0.0960783	0.10739
4.52	0.190402	0.253645	0.0426885	0.0691495	-0.0164771	0.15357	0.133952		4.52	0.480882	0.491217	-0.0539784	0.0488695	-0.0209845	0.0979039	0.111838
4.52333	0.195761	0.254659	0.0457209	0.0678825	-0.0094501	0.153216	0.130093		4.52333	0.477422	0.488733	-0.0556515	0.0479998	-0.0246126	0.100477	0.110843
4.52667	0.190085	0.252566	0.0468129	0.0692875	-0.0113144	0.151742	0.133888		4.52667	0.48391	0.489896	-0.0542426	0.0466266	-0.021349	0.0959653	0.112332
4.53	0.192298	0.255929	0.0399724	0.0670473	-0.00860254	0.149996	0.131512		4.53	0.481078	0.489516	-0.0561198	0.0430515	-0.0246645	0.0928396	0.111562
4.53333	0.188164	0.256939	0.0422202	0.0685285	-0.00957589	0.14852	0.132229		4.53333	0.477403	0.497702	-0.0507631	0.0432933	-0.0222956	0.0978018	0.107899
4.53667	0.188384	0.253706	0.0420944	0.0671329	-0.0109882	0.155158	0.131435		4.53667	0.482826	0.489449	-0.0550711	0.0462153	-0.0255902	0.0954297	0.106253
4.54	0.187642	0.252325	0.0418801	0.0655946	-0.0114146	0.150734	0.133349		4.54	0.478224	0.485164	-0.0541811	0.045127	-0.0216855	0.101044	0.106218
4.54333	0.192084	0.25314	0.0444065	0.0679988	-0.0101228	0.152215	0.136967		4.54333	0.481697	0.488259	-0.0579561	0.04541	-0.0144948	0.0961193	0.112167
4.54667	0.189531	0.252911	0.0423099	0.068797	-0.00823968	0.152975	0.133103		4.54667	0.487301	0.492917	-0.0542669	0.0481869	-0.0256236	0.100687	0.109413
4.55	0.189174	0.252127	0.0414248	0.0694647	-0.0099227	0.152021	0.131078		4.55	0.479294	0.492918	-0.0564595	0.0414861	-0.0217401	0.102061	0.111763
4.55333	0.189537	0.254847	0.0447007	0.0720317	-0.010592	0.153724	0.132672		4.55333	0.484065	0.490525	-0.0540131	0.0443148	-0.0199103	0.103567	0.109685
4.55667	0.18834	0.255259	0.0470465	0.0721981	-0.0096462	0.150254	0.137909		4.55667	0.481326	0.494365	-0.0579061	0.0465386	-0.0198106	0.101843	0.111102
4.56	0.184246	0.255617	0.0397451	0.0694331	-0.0123137	0.150785	0.136015		4.56	0.482057	0.489499	-0.0562316	0.0491292	-0.0220148	0.0988761	0.111591
4.56333	0.18425	0.256765	0.0443909	0.0680121	-0.0169741	0.150731	0.136118		4.56333	0.474569	0.490593	-0.0572324	0.0435321	-0.0245606	0.0941087	0.111554
4.56667	0.191858	0.255035	0.0452674	0.0703582	-0.011322	0.14975	0.131079		4.56667	0.480527	0.48903	-0.0537179	0.0412864	-0.0224771	0.0947496	0.109002
4.57	0.191491	0.254655	0.042868	0.0674452	-0.0116696	0.153097	0.132182		4.57	0.479817	0.491755	-0.0545911	0.0451934	-0.022293	0.0976191	0.107774
4.57333	0.187027	0.252821	0.0418762	0.0664143	-0.00746097	0.152259	0.130412		4.57333	0.483633	0.48811	-0.0537412	0.0439517	-0.0246855	0.0951937	0.109347
4.57667	0.185775	0.254975	0.0414329	0.0705211	-0.0112368	0.150069	0.130463		4.57667	0.478409	0.487231	-0.0544804	0.0443955	-0.0247411	0.0984995	0.11442
4.58	0.18454	0.249597	0.0421347	0.0713884	-0.0154384	0.155714	0.132691		4.58	0.476807	0.489705	-0.0572763	0.0470295	-0.0234099	0.0954436	0.112351
4.58333	0.189614	0.252703	0.0401488	0.0692211	-0.0133619	0.153865	0.133413		4.58333	0.483612	0.490156	-0.0582465	0.035457	-0.0261965	0.101843	0.110429
4.58667	0.188605	0.255273	0.0436855	0.0689977	-0.014064	0.155091	0.139468		4.58667	0.47608	0.485903	-0.0529955	0.0410259	-0.0240171	0.100323	0.112422
4.59	0.184459	0.251672	0.0431119	0.0669484	-0.015373	0.153052	0.132857		4.59	0.481287	0.491251	-0.0551224	0.0453667	-0.0237415	0.0994709	0.1102
4.59333	0.191686	0.25224	0.0389919	0.0667844	-0.0124109	0.152642	0.136002		4.59333	0.477914	0.487578	-0.0533944	0.0426407	-0.023167	0.098929	0.108779
4.59667	0.188297	0.252537	0.0436248	0.0705607	-0.0118439	0.149334	0.133187		4.59667	0.47523	0.488991	-0.0527174	0.0471787	-0.0222606	0.0987783	0.110863
4.6	0.189187	0.256314	0.0436799	0.0666828	-0.0115887	0.15383	0.138406		4.6	0.478974	0.493203	-0.0552396	0.0455564	-0.022202	0.0986482	0.10954
4.60333	0.18715	0.255874	0.0435708	0.0666663	-0.0124052	0.149812	0.131626		4.60333	0.473917	0.493523	-0.0504028	0.0431202	-0.0261144	0.101884	0.104104
4.60667	0.189507	0.255196	0.0410684	0.070819	-0.00901633	0.154856	0.137535		4.60667	0.475678	0.487472	-0.0542801	0.0423694	-0.0210138	0.0967162	0.111705
4.61	0.185267	0.257175	0.0444176	0.0724909	-0.00763335	0.152547	0.137905		4.61	0.479225	0.491511	-0.0565216	0.0429608	-0.0219987	0.0947989	0.110771
4.61333	0.18842	0.25185	0.0422536	0.0672171	-0.00765951	0.15541	0.136572		4.61333	0.480224	0.493254	-0.0574006	0.0438136	-0.0245397	0.101189	0.114403
4.61667	0.185079	0.25532	0.0424222	0.0687259	-0.0153067	0.159322	0.136482		4.61667	0.476479	0.491036	-0.0569103	0.0432698	-0.0241451	0.105726	0.11191
4.62	0.184889	0.251996	0.0450485	0.0705241	-0.0169171	0.158157	0.132496		4.62	0.479744	0.488435	-0.0547123	0.044553	-0.0249773	0.100259	0.112238
4.62333	0.186454	0.254936	0.0417567	0.0689899	-0.00630706	0.154959	0.13973		4.62333	0.479773	0.48682	-0.0546503	0.0407266	-0.0212461	0.107212	0.110862
4.62667	0.191046	0.251633	0.0439522	0.0682134	-0.0144006	0.155573	0.137463		4.62667	0.474009	0.487132	-0.0584469	0.0396446	-0.022038	0.0997353	0.114624
4.63	0.188117	0.253981	0.0433566	0.0655916	-0.00744821	0.155821	0.134156		4.63	0.480252	0.487791	-0.0558515	0.0410914	-0.0236497	0.0981949	0.113339
4.63333	0.189942	0.249612	0.0383088	0.06733	-0.0103478	0.151055	0.135679		4.63333	0.476904	0.492816	-0.0576387	0.0441127	-0.0204351	0.100304	0.112474
4.63667	0.188999	0.248865	0.040621	0.0667458	-0.00981537	0.153251	0.133152		4.63667	0.475074	0.489206	-0.0615986	0.0415389	-0.0213728	0.101204	0.110917
4.64	0.188293	0.255802	0.0404799	0.0694638	-0.00910494	0.154468	0.133503		4.64	0.476216	0.484571	-0.0569357	0.0466084	-0.0192578	0.0973743	0.109556
4.64333	0.187024	0.255328	0.041643	0.0736044	-0.0128729	0.158506	0.133161		4.64333	0.478899	0.490837	-0.0531178	0.0422318	-0.0245028	0.0970783	0.109177
4.64667	0.19328	0.254737	0.0438074	0.0660545	-0.0114588	0.156618	0.132198		4.64667	0.477865	0.488326	-0.0592779	0.0508744	-0.0214161	0.0989195	0.111203
4.65	0.187729	0.254207	0.0443599	0.0693147	-0.0118089	0.150735	0.135838		4.65	0.477023	0.485472	-0.0585193	0.041853	-0.0236809	0.0978784	0.113627
4.65333	0.190749	0.254787	0.0370786	0.0681282	-0.00753626	0.149356	0.135416		4.65333	0.481281	0.487063	-0.0578615	0.0382282	-0.0261786	0.100771	0.115208
4.65667	0.189993	0.254039	0.0451781	0.0667721	-0.0120295	0.151522	0.133024		4.65667	0.476031	0.488907	-0.0580956	0.0442485	-0.0241146	0.10114	0.109675
4.66	0.188974	0.255751	0.0446804	0.0700875	-0.0130108	0.153958	0.135345		4.66	0.476142	0.486206	-0.0573836	0.0409151	-0.020368	0.102429	0.11073
4.66333	0.185495	0.254875	0.0388605	0.0660688	-0.00985475	0.155229	0.136548		4.66333	0.479552	0.490019	-0.0546977	0.043007	-0.0234628	0.0967352	0.113547
4.66667	0.194016	0.25599	0.0415311	0.0693143	-0.0101619	0.154816	0.136894		4.66667	0.475903	0.487119	-0.0562487	0.045215	-0.0251425	0.102257	0.113104
4.67	0.189839	0.256244	0.0417123	0.0650235	-0.014347	0.154447	0.131724		4.67	0.478763	0.484071	-0.0610312	0.0399597	-0.0243267	0.102064	0.111489
4.67333	0.188865	0.25	0.0414746	0.0675129	-0.013952	0.150922	0.136194		4.67333	0.475141	0.48913	-0.0536545	0.0448439	-0.0222762	0.0994006	0.112231
4.67667	0.187959	0.250607	0.0418766	0.0687067	-0.00950146	0.156279	0.135838		4.67667	0.475557	0.486864	-0.0574506	0.0389378	-0.019449	0.104036	0.114743
4.68	0.18825	0.251664	0.0409796	0.0684261	-0.0134182	0.156863	0.137435		4.68	0.47883	0.489889	-0.0594406	0.0426053	-0.0204777	0.0998954	0.113434
4.68333	0.185503	0.25476	0.0418308	0.0646339	-0.0120381	0.156156	0.134485		4.68333	0.476875	0.489092	-0.0559107	0.0457214	-0.0214415	0.100478	0.115468
4.68667	0.188895	0.256122	0.0402882	0.0653333	-0.00700658	0.155535	0.13679		4.68667	0.475525	0.488316	-0.0572747	0.0443624	-0.0292056	0.0999948	0.109986
4.69	0.18728	0.254761	0.0408601	0.0716955	-0.0103714	0.157871	0.135412		4.69	0.47813	0.490071	-0.0565092	0.0409158	-0.0200528	0.103853	0.11484
4.69333	0.183199	0.254588	0.0386845	0.0699861	-0.013323	0.150456	0.131091		4.69333	0.4777	0.485326	-0.0585734	0.0439488	-0.0234849	0.100081	0.109341
4.69667	0.18913	0.252965	0.0416471	0.0705784	-0.0128469	0.153162	0.137209		4.69667	0.47799	0.486149	-0.056047	0.0400498	-0.0233805	0.0999829	0.108452
4.7	0.190444	0.25254	0.0419156	0.0687882	-0.0167837	0.155509	0.134819		4.7	0.477367	0.486578	-0.0588574	0.0425092	-0.0199141	0.101791	0.111366
4.70333	0.188815	0.257591	0.0392776	0.0686627	-0.0122086	0.152175	0.127998		4.70333	0.48123	0.490014	-0.0556923	0.0405908	-0.0213004	0.104444	0.111713
4.70667	0.192177	0.253473	0.0419429	0.068985	-0.0113304	0.154471	0.133857		4.70667	0.477984	0.491084	-0.0581419	0.0438056	-0.0225391	0.100882	0.109878
4.71	0.186957	0.25494	0.0403551	0.0666234	-0.0134095	0.154939	0.136199		4.71	0.474312	0.486377	-0.0569868	0.0462608	-0.021873	0.100549	0.109434
4.71333	0.18858	0.255032	0.0372126	0.0636803	-0.0110238	0.1543	0.138197		4.71333	0.475154	0.487766	-0.0564082	0.0416973	-0.0217326	0.0987791	0.110901
4.71667	0.187291	0.255169	0.0426903	0.0679939	-0.014196	0.155603	0.134209		4.71667	0.477829	0.487512	-0.0604151	0.038922	-0.0251746	0.104879	0.112753
4.72	0.183622	0.251829	0.0447196	0.0655659	-0.00877661	0.153104	0.135149		4.72	0.478133	0.487446	-0.0613372	0.0407885	-0.021911	0.105635	0.114788
4.72333	0.185126	0.254783	0.0387137	0.0651217	-0.00876113	0.155973	0.137816		4.72333	0.476294	0.48456	-0.0583123	0.0428747	-0.0249078	0.0988641	0.1139
4.72667	0.184719	0.253842	0.0406669	0.0649678	-0.00948333	0.155075	0.132502		4.72667	0.478845	0.487908	-0.0595965	0.0406871	-0.0221311	0.0992234	0.10954
4.73	0.189495	0.256523	0.0419754	0.0685747	-0.0139555	0.159821	0.132506		4.73	0.476019	0.485985	-0.0538612	0.04229	-0.0228026	0.105474	0.111559
4.73333	0.186961	0.254312	0.0451315	0.0699091	-0.0144027	0.155845	0.138434		4.73333	0.476603	0.487762	-0.0618074	0.0432508	-0.0209988	0.100748	0.11378
4.73667	0.191905	0.254675	0.04457	0.0628998	-0.0129265	0.154199	0.140482		4.73667	0.478223	0.484744	-0.0598446	0.0476776	-0.0227935	0.100987	0.115198
4.74	0.188319	0.254413	0.042434	0.0675433	-0.0139961	0.15464	0.138731		4.74	0.476204	0.485122	-0.0613098	0.0434402	-0.0221867	0.100957	0.113869
4.74333	0.185926	0.25536	0.0404777	0.0679699	-0.0150399	0.151908	0.137295		4.74333	0.478933	0.483083	-0.0564522	0.0400739	-0.0228968	0.105491	0.11257
4.74667	0.188297	0.252351	0.0425244	0.0704418	-0.0104435	0.152209	0.137874		4.74667	0.478287	0.483709	-0.0590253	0.0415429	-0.0282982	0.0989628	0.11132
4.75	0.184223	0.256826	0.037889	0.0668553	-0.011091	0.154979	0.137659		4.75	0.477288	0.48458	-0.0614236	0.0438908	-0.0222064	0.102776	0.112187
4.75333	0.186685	0.254474	0.0416078	0.0705117	-0.00865248	0.15383	0.134493		4.75333	0.471622	0.48676	-0.0537746	0.044907	-0.019035	0.100113	0.112193
4.75667	0.192139	0.255631	0.0435466	0.0656588	-0.0124821	0.15589	0.135936		4.75667	0.475338	0.486539	-0.0557599	0.039351	-0.0251442	0.103306	0.11165
4.76	0.188844	0.251027	0.0386857	0.0678362	-0.0138838	0.155674	0.135812		4.76	0.478148	0.487227	-0.0587604	0.0382532	-0.023273	0.103339	0.115227
4.76333	0.180165	0.253655	0.0383432	0.0679791	-0.0144578	0.156995	0.136425		4.76333	0.473347	0.484667	-0.059877	0.0413472	-0.0242003	0.100369	0.113713
4.76667	0.189888	0.25763	0.0389069	0.067764	-0.0117744	0.153209	0.13091		4.76667	0.476907	0.485951	-0.0600213	0.0428859	-0.0249568	0.106725	0.108418
4.77	0.18723	0.250031	0.0386138	0.0656957	-0.008822	0.157236	0.132828		4.77	0.475825	0.48633	-0.0574743	0.0407447	-0.0287965	0.104165	0.11313
4.77333	0.186302	0.251471	0.0436131	0.0692833	-0.0119187	0.151779	0.136398		4.77333	0.474904	0.482951	-0.0582252	0.04598	-0.0222996	0.107242	0.11114
4.77667	0.190814	0.255053	0.0396402	0.0710612	-0.0151759	0.157972	0.134046		4.77667	0.477136	0.482673	-0.0599472	0.0429836	-0.0243088	0.0997481	0.111447
4.78	0.184915	0.253252	0.036446	0.069989	-0.011299	0.155597	0.137833		4.78	0.477111	0.484829	-0.0602277	0.0405336	-0.0185271	0.104754	0.111408
4.78333	0.187395	0.257732	0.0407672	0.064258	-0.011798	0.15807	0.137518		4.78333	0.473147	0.482348	-0.0583037	0.0439339	-0.0236584	0.104347	0.108988
4.78667	0.188551	0.257247	0.0420706	0.0658037	-0.013496	0.158008	0.132394		4.78667	0.47278	0.487704	-0.0613479	0.0393371	-0.0213636	0.102903	0.114294
4.79	0.192691	0.25337	0.0422747	0.0671735	-0.011169	0.153555	0.135724		4.79	0.479418	0.488853	-0.0623924	0.0381452	-0.0258854	0.103129	0.111346
4.79333	0.187736	0.253167	0.0416697	0.0672385	-0.0152058	0.159539	0.135741		4.79333	0.471011	0.483461	-0.0600836	0.0350101	-0.0213224	0.103194	0.11635
4.79667	0.186816	0.258425	0.0400832	0.0680257	-0.0128728	0.156241	0.13775		4.79667	0.478397	0.484875	-0.0634664	0.0383348	-0.0245327	0.104014	0.11321
4.8	0.185943	0.256529	0.0430323	0.0684304	-0.0120635	0.154617	0.131985		4.8	0.474809	0.485432	-0.0628037	0.0422606	-0.0187574	0.103867	0.114337
4.80333	0.184958	0.256438	0.0429947	0.0723794	-0.0130466	0.156548	0.133265		4.80333	0.472539	0.485034	-0.0598956	0.0478279	-0.0250035	0.101998	0.115197
4.80667	0.18655	0.255867	0.0411847	0.0693042	-0.00964473	0.156894	0.134539		4.80667	0.467637	0.479723	-0.0583077	0.043008	-0.0243515	0.0995781	0.112128
4.81	0.18664	0.249824	0.0410194	0.0648188	-0.0123555	0.154197	0.13799		4.81	0.476917	0.486705	-0.0625819	0.0476453	-0.0221088	0.102385	0.117194
4.81333	0.18686	0.255937	0.0407686	0.0650507	-0.0142739	0.158587	0.141791		4.81333	0.475107	0.482731	-0.0562856	0.0390229	-0.021645	0.103889	0.114418
4.81667	0.186407	0.253998	0.0351334	0.0645408	-0.0101627	0.15608	0.135587		4.81667	0.472794	0.488592	-0.0591457	0.0456804	-0.0198878	0.104675	0.109688
4.82	0.186091	0.256587	0.0407359	0.0664095	-0.0152354	0.154315	0.138943		4.82	0.476297	0.486361	-0.0597243	0.0429881	-0.0258682	0.0999892	0.112038
4.82333	0.189071	0.254807	0.0373792	0.067338	-0.0102032	0.15773	0.138407		4.82333	0.474173	0.479871	-0.0567517	0.0406048	-0.026402	0.104613	0.114774
4.82667	0.188986	0.252451	0.044786	0.0692988	-0.0105878	0.156672	0.136474		4.82667	0.472966	0.483908	-0.0602872	0.0373204	-0.0225525	0.104406	0.113286
4.83	0.189573	0.251416	0.0385741	0.0667141	-0.0123851	0.155538	0.134642		4.83	0.470503	0.48492	-0.0624252	0.0401089	-0.0251044	0.105602	0.113328
4.83333	0.187884	0.256239	0.0400718	0.0683891	-0.00915222	0.158017	0.136071		4.83333	0.473283	0.478523	-0.058372	0.0405811	-0.0225509	0.10125	0.113113
4.83667	0.185988	0.255209	0.0407357	0.0718301	-0.0116399	0.157174	0.142076		4.83667	0.473304	0.485075	-0.0579029	0.0408612	-0.0240809	0.105839	0.117303
4.84	0.193282	0.256532	0.0428227	0.0672792	-0.0130141	0.153239	0.136775		4.84	0.471559	0.480119	-0.0627235	0.0415219	-0.0232939	0.105065	0.116453
4.84333	0.187415	0.255777	0.0443788	0.0668345	-0.0124218	0.158574	0.136442		4.84333	0.478293	0.482087	-0.0610529	0.0399101	-0.0251717	0.105591	0.111558
4.84667	0.187548	0.258424	0.0409469	0.0706335	-0.0122329	0.155432	0.133339		4.84667	0.474635	0.488811	-0.0624275	0.0384637	-0.0198053	0.10232	0.11146
4.85	0.186788	0.254258	0.0430935	0.0685127	-0.0157099	0.159226	0.138523		4.85	0.475607	0.482409	-0.0616168	0.036214	-0.0235693	0.10197	0.113984
4.85333	0.18614	0.256928	0.0365034	0.0709337	-0.0131579	0.155271	0.135022		4.85333	0.479131	0.482764	-0.0633862	0.0385853	-0.020478	0.105407	0.116617
4.85667	0.187274	0.255883	0.0416255	0.0667901	-0.0107359	0.152622	0.13712		4.85667	0.473374	0.48526	-0.0601927	0.0372237	-0.0234326	0.100017	0.114002
4.86	0.188623	0.250262	0.0404398	0.0658037	-0.013791	0.155133	0.134402		4.86	0.475785	0.479742	-0.0614094	0.0373785	-0.0209261	0.104264	0.112753
4.86333	0.187231	0.256693	0.0421128	0.0678896	-0.0146892	0.159025	0.135517		4.86333	0.477386	0.485557	-0.0561727	0.0382667	-0.0221362	0.10168	0.111359
4.86667	0.188857	0.254128	0.0411066	0.0681781	-0.0110578	0.153485	0.137242		4.86667	0.476688	0.486132	-0.0589835	0.0409396	-0.0255336	0.104278	0.116499
4.87	0.186728	0.255394	0.0406575	0.0684373	-0.0144363	0.156993	0.138293		4.87	0.47204	0.481232	-0.0635689	0.0391998	-0.020752	0.108405	0.118005
4.87333	0.190114	0.256019	0.0409231	0.0697315	-0.0102438	0.156494	0.139525		4.87333	0.47253	0.482967	-0.0604314	0.0451886	-0.0250122	0.107975	0.115044
4.87667	0.18767	0.253552	0.0409878	0.0675733	-0.00867586	0.153444	0.141065		4.87667	0.474283	0.477998	-0.0633853	0.0355391	-0.0238325	0.105433	0.113941
4.88	0.187769	0.25169	0.0395024	0.0653184	-0.0130266	0.155122	0.139078		4.88	0.476262	0.482654	-0.0620366	0.0401267	-0.0239406	0.102648	0.114957
4.88333	0.189694	0.254291	0.0417148	0.0696463	-0.0128493	0.156893	0.139891		4.88333	0.473675	0.484192	-0.0556467	0.0432677	-0.0253796	0.106891	0.116492
4.88667	0.187044	0.255839	0.0402614	0.0686121	-0.0102381	0.158456	0.142258		4.88667	0.473979	0.482187	-0.0643522	0.0395134	-0.0212414	0.104556	0.114876
4.89	0.185664	0.255622	0.0364178	0.0667974	-0.0135298	0.159754	0.140662		4.89	0.472695	0.478829	-0.0605448	0.0415735	-0.0216342	0.103572	0.113343
4.89333	0.185541	0.256834	0.0408982	0.0683992	-0.0120703	0.157772	0.14146		4.89333	0.479358	0.485455	-0.066761	0.0398673	-0.0234581	0.1053	0.114426
4.89667	0.18861	0.253914	0.0441674	0.0671105	-0.00857183	0.157454	0.13773		4.89667	0.474609	0.487949	-0.0606965	0.0406827	-0.0289605	0.108105	0.112734
4.9	0.189516	0.253807	0.0416337	0.065785	-0.01509	0.156295	0.142461		4.9	0.474217	0.481868	-0.0682452	0.0366237	-0.0290696	0.106153	0.118932
4.90333	0.188383	0.253773	0.0431641	0.0664344	-0.0117558	0.159164	0.138885		4.90333	0.473063	0.478864	-0.0609096	0.0445118	-0.0258542	0.102674	0.114825
4.90667	0.184845	0.254652	0.0422723	0.0687694	-0.0123583	0.158205	0.13544		4.90667	0.473618	0.481132	-0.0628792	0.0407559	-0.0229878	0.106782	0.116337
4.91	0.18953	0.251175	0.0424715	0.067027	-0.0117432	0.158551	0.131063		4.91	0.468282	0.480435	-0.0651407	0.040489	-0.0256371	0.103279	0.116527
4.91333	0.186753	0.259269	0.0370643	0.0675931	-0.0118696	0.156568	0.134965		4.91333	0.471178	0.480701	-0.0616848	0.042577	-0.0221697	0.102855	0.119215
4.91667	0.188563	0.253152	0.0417577	0.0691299	-0.0161219	0.162036	0.141491		4.91667	0.471588	0.48514	-0.0631549	0.044279	-0.0267169	0.105182	0.116911
4.92	0.189111	0.252966	0.0392945	0.0688848	-0.0118005	0.158551	0.139472		4.92	0.474155	0.484796	-0.0570924	0.0396369	-0.0244336	0.105613	0.112999
4.92333	0.187837	0.25441	0.0440297	0.0615752	-0.0157441	0.157608	0.138087		4.92333	0.471449	0.47984	-0.0589036	0.0430252	-0.0250811	0.107184	0.11679
4.92667	0.187272	0.253756	0.0424512	0.0668932	-0.0141351	0.154576	0.138315		4.92667	0.47329	0.482154	-0.062453	0.0403866	-0.021907	0.104953	0.115253
4.93	0.187429	0.251573	0.0436508	0.0683537	-0.0120076	0.157416	0.137253		4.93	0.471886	0.480032	-0.0597401	0.0399379	-0.0235435	0.109067	0.111983
4.93333	0.189261	0.255212	0.0399314	0.0621242	-0.012864	0.160107	0.137252		4.93333	0.472125	0.482273	-0.0628615	0.04111	-0.0246189	0.101703	0.111678
4.93667	0.189739	0.253336	0.038135	0.0682799	-0.0144779	0.157934	0.139195		4.93667	0.471795	0.482364	-0.0632281	0.0426193	-0.022677	0.101729	0.117751
4.94	0.18729	0.254346	0.0420256	0.0673564	-0.0153466	0.155459	0.135218		4.94	0.470762	0.48338	-0.0651437	0.0410822	-0.0214933	0.109187	0.115096
4.94333	0.186323	0.256545	0.0390077	0.0656039	-0.0120295	0.158386	0.137394		4.94333	0.471575	0.477001	-0.0681776	0.0373434	-0.0248658	0.103771	0.113884
4.94667	0.184929	0.256441	0.0367603	0.0681373	-0.0117411	0.156685	0.139529		4.94667	0.475505	0.479142	-0.0642643	0.0382252	-0.0222977	0.10555	0.11799
4.95	0.189022	0.254396	0.0387222	0.0717198	-0.00848258	0.156496	0.139368		4.95	0.474218	0.476405	-0.0639181	0.0412106	-0.0232517	0.106987	0.116629
4.95333	0.188217	0.258199	0.0430261	0.0683552	-0.0105417	0.160379	0.141762		4.95333	0.471061	0.476305	-0.0598851	0.0373397	-0.0242068	0.106385	0.116476
4.95667	0.18817	0.256973	0.0401255	0.0701002	-0.0112055	0.158453	0.144069		4.95667	0.472722	0.484809	-0.0633516	0.0416921	-0.0254436	0.104867	0.116935
4.96	0.184344	0.251787	0.0454213	0.0650966	-0.00766363	0.157768	0.141209		4.96	0.467333	0.481221	-0.06645	0.0359883	-0.0265708	0.105723	0.120435
4.96333	0.187641	0.25357	0.040744	0.0710148	-0.0117255	0.15907	0.137692		4.96333	0.471088	0.482265	-0.0594739	0.0416532	-0.0244408	0.103183	0.116459
4.96667	0.189495	0.256278	0.0463711	0.0668041	-0.0125796	0.15644	0.136546		4.96667	0.469825	0.478809	-0.066534	0.0405844	-0.024373	0.0988338	0.118615
4.97	0.186189	0.259199	0.0397569	0.0660112	-0.00677931	0.160301	0.137253		4.97	0.47082	0.479809	-0.0609596	0.0383425	-0.0204976	0.104786	0.114509
4.97333	0.185196	0.252983	0.0397204	0.0609766	-0.0155946	0.157314	0.141283		4.97333	0.475681	0.482112	-0.0650115	0.0379223	-0.027425	0.105408	0.120277
4.97667	0.184909	0.252751	0.043193	0.0696287	-0.012116	0.158169	0.13399		4.97667	0.472606	0.478314	-0.0636138	0.0391682	-0.024257	0.102657	0.117018
4.98	0.189898	0.258795	0.0417322	0.0652877	-0.0102966	0.161605	0.14032		4.98	0.471744	0.480374	-0.058227	0.0379169	-0.0259668	0.110189	0.11594
4.98333	0.18945	0.254661	0.0399412	0.06645	-0.0121613	0.158323	0.13678		4.98333	0.470713	0.480546	-0.060505	0.039934	-0.0237955	0.107355	0.113843
4.98667	0.188376	0.255769	0.0402361	0.0695077	-0.0100915	0.160639	0.13866		4.98667	0.474584	0.481244	-0.0658612	0.0381914	-0.0234048	0.104769	0.123085
4.99	0.189825	0.252159	0.0393708	0.0682802	-0.0126734	0.161964	0.139137		4.99	0.47346	0.47886	-0.0586651	0.0382844	-0.0250608	0.103832	0.114457
4.99333	0.186919	0.256838	0.0407343	0.0684398	-0.0143984	0.165156	0.141947		4.99333	0.466494	0.480657	-0.0698368	0.0369838	-0.0206517	0.102761	0.118083
4.99667	0.191723	0.259666	0.0420607	0.0642041	-0.015477	0.15759	0.136587		4.99667	0.468334	0.479859	-0.0627918	0.0381406	-0.0279805	0.106511	0.11693
5	0.185133	0.253973	0.042184	0.0713939	-0.0128117	0.161845	0.137474		5	0.471624	0.479564	-0.064067	0.0395302	-0.0234112	0.10421	0.118601
5.00333	0.186148	0.253495	0.041963	0.0666319	-0.0116352	0.161737	0.141041		5.00333	0.471118	0.477477	-0.0561157	0.0410415	-0.0236728	0.10853	0.119831
5.00667	0.187853	0.258421	0.0406634	0.0691319	-0.0144492	0.161576	0.137666		5.00667	0.468956	0.480411	-0.0606894	0.0376394	-0.0224389	0.105503	0.118005
5.01	0.185013	0.255162	0.0407747	0.0646345	-0.00907947	0.160556	0.134824		5.01	0.470014	0.479075	-0.0603054	0.0423557	-0.0237227	0.106177	0.117706
5.01333	0.189605	0.25426	0.0381256	0.0680606	-0.0107234	0.15921	0.143553		5.01333	0.474689	0.478322	-0.0662397	0.0362565	-0.0269599	0.104903	0.117418
5.01667	0.187321	0.251655	0.0414578	0.071021	-0.0147163	0.160682	0.141751		5.01667	0.467778	0.477392	-0.0658704	0.0418804	-0.0282344	0.109576	0.116038
5.02	0.187741	0.258118	0.0397975	0.0658329	-0.00997234	0.161066	0.142672		5.02	0.468088	0.47788	-0.0635832	0.0372219	-0.0236692	0.104421	0.118409
5.02333	0.191057	0.256981	0.0396834	0.0668735	-0.00684273	0.162036	0.142887		5.02333	0.472749	0.47683	-0.0634287	0.0403157	-0.0223402	0.105352	0.114814
5.02667	0.184702	0.259776	0.0392383	0.0672664	-0.0165598	0.162433	0.13862		5.02667	0.471592	0.479607	-0.0633706	0.0373423	-0.0224741	0.104392	0.115321
5.03	0.191345	0.255091	0.038908	0.0634912	-0.0116276	0.159478	0.136502		5.03	0.46807	0.477409	-0.0632664	0.0365088	-0.0229018	0.10332	0.116545
5.03333	0.190188	0.250465	0.0408252	0.0670383	-0.0105389	0.160902	0.136948		5.03333	0.472037	0.475737	-0.0636759	0.0371941	-0.0226576	0.105486	0.121178
5.03667	0.188084	0.255619	0.0422459	0.0684723	-0.0131792	0.163482	0.140222		5.03667	0.465529	0.477153	-0.0650671	0.0392057	-0.0230937	0.106422	0.120399
5.04	0.186907	0.255837	0.0430002	0.0685763	-0.0141766	0.163313	0.138436		5.04	0.470017	0.477869	-0.0658977	0.0407788	-0.0278791	0.106998	0.116954
5.04333	0.187534	0.2563	0.0408145	0.0693826	-0.0141717	0.16316	0.141075		5.04333	0.463379	0.478008	-0.0643826	0.0394369	-0.0223052	0.106179	0.118418
5.04667	0.184626	0.256985	0.0431177	0.0672798	-0.0158037	0.162412	0.13709		5.04667	0.464231	0.47898	-0.0693271	0.0378742	-0.0235551	0.104344	0.115209
5.05	0.188528	0.255821	0.0390552	0.0689797	-0.0127064	0.163548	0.1377		5.05	0.471883	0.476269	-0.0623048	0.0351891	-0.0275457	0.107053	0.120141
5.05333	0.188468	0.255244	0.0418921	0.0674138	-0.0130183	0.160703	0.140953		5.05333	0.468895	0.475953	-0.0656842	0.0348792	-0.0235984	0.108179	0.118708
5.05667	0.188903	0.254738	0.0369622	0.0676861	-0.0115878	0.161751	0.140011		5.05667	0.46732	0.479914	-0.0672414	0.0420729	-0.0276051	0.108318	0.115569
5.06	0.186048	0.257068	0.0360105	0.0665281	-0.0122209	0.162241	0.144451		5.06	0.468697	0.479387	-0.0657886	0.0354504	-0.0278882	0.106983	0.113665
5.06333	0.19216	0.257776	0.0401105	0.0697988	-0.0171782	0.157776	0.138953		5.06333	0.472787	0.479158	-0.0630784	0.0347377	-0.0228632	0.107676	0.121549
5.06667	0.186694	0.257307	0.037173	0.0671213	-0.0136831	0.157859	0.14029		5.06667	0.472254	0.474737	-0.0693327	0.0367315	-0.0269595	0.107974	0.119873
5.07	0.186461	0.257291	0.0411072	0.0669297	-0.0118881	0.16252	0.143109		5.07	0.466493	0.475951	-0.0638746	0.034061	-0.023866	0.108731	0.11403
5.07333	0.18752	0.255079	0.0390402	0.0641401	-0.0104695	0.158298	0.140173		5.07333	0.469147	0.47927	-0.0635372	0.0360914	-0.0253741	0.110575	0.117352
5.07667	0.187464	0.253127	0.0395697	0.0698066	-0.00971954	0.158655	0.140723		5.07667	0.466732	0.477229	-0.069325	0.0391342	-0.022753	0.107916	0.11965
5.08	0.187426	0.254062	0.0411743	0.0659806	-0.0130853	0.161064	0.140143		5.08	0.464134	0.47928	-0.0658869	0.0365799	-0.0271102	0.108473	0.11726
5.08333	0.190711	0.25356	0.0383122	0.0666107	-0.0104636	0.164429	0.143035		5.08333	0.470881	0.479934	-0.062765	0.03999	-0.0197778	0.105267	0.116709
5.08667	0.18507	0.254578	0.0360248	0.0697701	-0.0158921	0.163473	0.144527		5.08667	0.468562	0.479884	-0.0632902	0.0361142	-0.0219045	0.106346	0.113417
5.09	0.18752	0.255721	0.0421197	0.0662444	-0.0066188	0.159355	0.141537		5.09	0.466074	0.475229	-0.0638318	0.0327387	-0.0242868	0.107834	0.119878
5.09333	0.188379	0.255323	0.0412718	0.0694688	-0.0171657	0.15953	0.138454		5.09333	0.468712	0.481316	-0.065617	0.0382693	-0.0259793	0.108926	0.118385
5.09667	0.18603	0.260982	0.041195	0.0636734	-0.0118976	0.160112	0.14235		5.09667	0.469281	0.47708	-0.0669288	0.0362501	-0.0282772	0.110412	0.121804
5.1	0.18703	0.253487	0.0425049	0.0678828	-0.0161247	0.162277	0.139898		5.1	0.467995	0.480711	-0.0684252	0.0351746	-0.025569	0.10943	0.117529
5.10333	0.188272	0.255509	0.0443813	0.0672553	-0.0110175	0.161734	0.139186		5.10333	0.471401	0.480862	-0.064456	0.0366616	-0.0290766	0.107313	0.118452
5.10667	0.184919	0.2535	0.0412744	0.0705395	-0.0155502	0.162296	0.135416		5.10667	0.4687	0.477111	-0.0662188	0.0350441	-0.0278908	0.110526	0.11624
5.11	0.187848	0.254244	0.03723	0.0680489	-0.0128392	0.161013	0.137338		5.11	0.470493	0.47755	-0.0683243	0.0384593	-0.0268978	0.109588	0.11918
5.11333	0.188766	0.254039	0.0387392	0.0677228	-0.0103725	0.160186	0.142678		5.11333	0.469746	0.475096	-0.0677092	0.0397883	-0.0255135	0.102816	0.119151
5.11667	0.18922	0.254297	0.0405271	0.0644303	-0.0178388	0.162528	0.141284		5.11667	0.467345	0.480406	-0.0656885	0.0363574	-0.0254103	0.108919	0.11495
5.12	0.189314	0.256775	0.0410834	0.0640561	-0.0131045	0.160257	0.140799		5.12	0.466951	0.473675	-0.0652386	0.0325665	-0.026003	0.106819	0.116826
5.12333	0.187173	0.254418	0.0379974	0.0654534	-0.0133248	0.163513	0.143456		5.12333	0.470208	0.47821	-0.0649519	0.0351833	-0.0283606	0.112548	0.119731
5.12667	0.184325	0.251262	0.0437945	0.0671784	-0.0103046	0.158281	0.132346		5.12667	0.465088	0.476932	-0.0630674	0.0383103	-0.0241035	0.109592	0.123537
5.13	0.189142	0.25416	0.0395969	0.066806	-0.0102811	0.161356	0.137341		5.13	0.468079	0.475931	-0.0676054	0.033855	-0.0262166	0.10981	0.11408
5.13333	0.18584	0.254579	0.0382577	0.0659933	-0.016319	0.164136	0.138014		5.13333	0.46633	0.474766	-0.0672566	0.0347682	-0.0263925	0.106967	0.124006
5.13667	0.184886	0.252912	0.0365721	0.068147	-0.0105931	0.166442	0.139634		5.13667	0.469527	0.47489	-0.0641408	0.0416791	-0.0281204	0.108296	0.120464
5.14	0.186318	0.253618	0.0389833	0.062745	-0.0123906	0.162619	0.140517		5.14	0.465006	0.477497	-0.0663483	0.034901	-0.0237995	0.107416	0.117604
5.14333	0.187595	0.256259	0.0383179	0.066625	-0.0148691	0.159083	0.140952		5.14333	0.46974	0.477951	-0.0661847	0.037925	-0.0276316	0.111747	0.122498
5.14667	0.18416	0.254736	0.0391822	0.0656051	-0.0107083	0.163758	0.140705		5.14667	0.46621	0.474539	-0.0687566	0.0317223	-0.0287457	0.107656	0.12192
5.15	0.185644	0.255929	0.0396544	0.0683517	-0.0135986	0.161234	0.139022		5.15	0.471466	0.475419	-0.0691485	0.0361486	-0.0261964	0.113303	0.120741
5.15333	0.183974	0.255798	0.0414539	0.0672444	-0.0181376	0.163698	0.147269		5.15333	0.467813	0.479104	-0.0671883	0.0375265	-0.0241988	0.110155	0.117089
5.15667	0.186642	0.252987	0.0404146	0.0701602	-0.0101495	0.166931	0.143133		5.15667	0.469951	0.477842	-0.066599	0.0353543	-0.0302179	0.107103	0.123013
5.16	0.184306	0.254468	0.0425189	0.0668823	-0.012777	0.160468	0.136559		5.16	0.464221	0.476824	-0.0701151	0.0356008	-0.0262248	0.10554	0.117079
5.16333	0.186794	0.257944	0.0398927	0.0639515	-0.0115911	0.167149	0.13964		5.16333	0.469989	0.475791	-0.0707564	0.036493	-0.0238278	0.106987	0.118759
5.16667	0.186682	0.254996	0.0420708	0.0682742	-0.0131463	0.164776	0.139511		5.16667	0.468775	0.475177	-0.0663195	0.0372757	-0.0275766	0.107857	0.120601
5.17	0.184485	0.258902	0.0354191	0.0677035	-0.012353	0.164326	0.140863		5.17	0.466635	0.469186	-0.0672526	0.0336945	-0.0205508	0.108862	0.121926
5.17333	0.18831	0.256229	0.0435422	0.0634249	-0.0140195	0.164546	0.137041		5.17333	0.465786	0.475744	-0.0666155	0.0366039	-0.0241781	0.110424	0.116436
5.17667	0.187206	0.251181	0.039782	0.0699701	-0.0145442	0.161413	0.142057		5.17667	0.468435	0.476099	-0.067931	0.0368952	-0.0284506	0.106716	0.119339
5.18	0.185693	0.256042	0.0399217	0.0698423	-0.0103929	0.162697	0.144743		5.18	0.467312	0.475994	-0.0659505	0.0352915	-0.0274887	0.105919	0.119641
5.18333	0.186642	0.254664	0.039393	0.0660155	-0.0132197	0.162621	0.142353		5.18333	0.468884	0.469213	-0.0695373	0.0376487	-0.0272848	0.107867	0.121044
5.18667	0.183908	0.254958	0.0421546	0.065394	-0.0129917	0.165218	0.142771		5.18667	0.466821	0.476228	-0.0718653	0.0320019	-0.0242819	0.107598	0.11758
5.19	0.190041	0.252616	0.0382543	0.0695723	-0.0116719	0.162725	0.14352		5.19	0.467065	0.478409	-0.0741997	0.0340438	-0.0248417	0.11195	0.119213
5.19333	0.184952	0.253729	0.0388815	0.0664595	-0.0126343	0.164817	0.146746		5.19333	0.463661	0.476076	-0.0685286	0.0342814	-0.0211568	0.107211	0.120534
5.19667	0.186935	0.254322	0.0408046	0.0680868	-0.0139223	0.161978	0.137913		5.19667	0.466486	0.483531	-0.0636698	0.0365462	-0.0224428	0.109184	0.11917
5.2	0.184808	0.256205	0.0429595	0.0657996	-0.0131899	0.167381	0.14134		5.2	0.467737	0.477152	-0.0652124	0.0333045	-0.0324385	0.107151	0.124021
5.20333	0.189636	0.253315	0.0422886	0.0703714	-0.0130838	0.161759	0.140926		5.20333	0.464667	0.475671	-0.0665214	0.0278846	-0.0277117	0.110248	0.121076
5.20667	0.188171	0.256334	0.039657	0.0638393	-0.012914	0.163669	0.140782		5.20667	0.461573	0.479062	-0.0670815	0.0312013	-0.0246835	0.110808	0.120561
5.21	0.186274	0.255276	0.0406579	0.0629768	-0.0111238	0.161159	0.143086		5.21	0.469152	0.475823	-0.0651724	0.0347384	-0.028932	0.107957	0.121887
5.21333	0.181438	0.253042	0.0353914	0.072138	-0.0127912	0.163959	0.143414		5.21333	0.465992	0.471316	-0.0700368	0.0372517	-0.0237555	0.108011	0.12088
5.21667	0.188925	0.253409	0.0364617	0.0656953	-0.0142794	0.165294	0.147066		5.21667	0.463609	0.474087	-0.0692894	0.0307378	-0.0238519	0.109784	0.121799
5.22	0.190663	0.252962	0.0425046	0.0679098	-0.0162487	0.165188	0.14001		5.22	0.467978	0.476326	-0.0672169	0.0325461	-0.0240077	0.109637	0.119031
5.22333	0.188494	0.254078	0.0401465	0.0629314	-0.0147012	0.16576	0.137028		5.22333	0.462961	0.472013	-0.06909	0.0354953	-0.0240043	0.109396	0.117997
5.22667	0.188565	0.256692	0.0370015	0.0711905	-0.0107323	0.161642	0.144154		5.22667	0.462902	0.47022	-0.0652382	0.0354166	-0.0247231	0.110344	0.117516
5.23	0.187158	0.255463	0.0387652	0.0646928	-0.0115258	0.160276	0.14316		5.23	0.469441	0.469493	-0.0646015	0.0327105	-0.0274544	0.107594	0.117909
5.23333	0.184511	0.258341	0.0396333	0.068376	-0.016476	0.165563	0.140291		5.23333	0.465947	0.472314	-0.0745119	0.0349512	-0.0251087	0.111995	0.121739
5.23667	0.186211	0.25832	0.039629	0.0646158	-0.0124755	0.167966	0.144219		5.23667	0.466847	0.469868	-0.0654636	0.034902	-0.027839	0.108514	0.116959
5.24	0.18559	0.254073	0.0392778	0.0681007	-0.0102553	0.163787	0.141891		5.24	0.466336	0.476228	-0.0669923	0.0400571	-0.028474	0.109549	0.114552
5.24333	0.1858	0.254036	0.0456454	0.0661217	-0.0157369	0.166228	0.142702		5.24333	0.466253	0.474466	-0.0655904	0.0312083	-0.0258294	0.109378	0.116637
5.24667	0.185971	0.254632	0.037571	0.066537	-0.0127506	0.162439	0.147287		5.24667	0.4649	0.475307	-0.0648734	0.0328961	-0.026127	0.110366	0.120358
5.25	0.187743	0.256751	0.0367565	0.070583	-0.0117398	0.171012	0.14032		5.25	0.467553	0.472074	-0.0690079	0.03352	-0.0232576	0.111157	0.120746
5.25333	0.188237	0.255	0.040818	0.0691851	-0.0123616	0.16671	0.144036		5.25333	0.467255	0.471287	-0.068046	0.0370512	-0.0259638	0.107124	0.122188
5.25667	0.186321	0.259847	0.041956	0.0691139	-0.0133019	0.162238	0.143234		5.25667	0.463541	0.46961	-0.0655156	0.0342924	-0.0263383	0.106221	0.120159
5.26	0.186055	0.255503	0.0364823	0.0648652	-0.0146208	0.162399	0.138533		5.26	0.46696	0.475169	-0.0697834	0.0356607	-0.0235222	0.111065	0.116501
5.26333	0.188484	0.256748	0.0423982	0.067729	-0.00952948	0.164752	0.138298		5.26333	0.46567	0.475535	-0.0710541	0.0324823	-0.0250038	0.113364	0.118769
5.26667	0.185096	0.256303	0.0394368	0.0654192	-0.0129532	0.1667	0.143987		5.26667	0.464228	0.477051	-0.0648873	0.0330405	-0.0282574	0.108002	0.121863
5.27	0.188076	0.251855	0.0410671	0.0683519	-0.0122375	0.163468	0.143723		5.27	0.462116	0.475851	-0.0701837	0.0390078	-0.0217479	0.110838	0.121489
5.27333	0.184406	0.254463	0.0377374	0.0719297	-0.0103682	0.161937	0.145397		5.27333	0.464547	0.477433	-0.0654892	0.0313274	-0.0275572	0.11272	0.122992
5.27667	0.18413	0.255797	0.040548	0.066392	-0.0133058	0.159011	0.144353		5.27667	0.466917	0.472191	-0.0676846	0.0333468	-0.0223937	0.112476	0.123347
5.28	0.187663	0.256081	0.0394935	0.0639926	-0.0131323	0.162833	0.144502		5.28	0.462651	0.475537	-0.0639	0.0304955	-0.0259617	0.110948	0.121298
5.28333	0.182254	0.25781	0.0367241	0.0683289	-0.0139586	0.164828	0.136939		5.28333	0.465221	0.470323	-0.0711928	0.039118	-0.0270789	0.113031	0.120325
5.28667	0.186623	0.252011	0.0423991	0.0649625	-0.0131561	0.161454	0.143867		5.28667	0.470411	0.469392	-0.0673632	0.0346004	-0.0232758	0.109622	0.120776
5.29	0.190182	0.250779	0.0402468	0.0717144	-0.00842157	0.162202	0.148958		5.29	0.464038	0.469619	-0.0688	0.0332247	-0.0293103	0.107265	0.123185
5.29333	0.183794	0.25556	0.038643	0.069192	-0.0152165	0.165477	0.143615		5.29333	0.46402	0.47057	-0.0687691	0.0314274	-0.0291107	0.111444	0.122597
5.29667	0.188058	0.257035	0.0418044	0.063526	-0.0126318	0.16578	0.142871		5.29667	0.467568	0.471415	-0.0690442	0.035735	-0.0244773	0.109566	0.123709
5.3	0.188124	0.256972	0.040168	0.0663742	-0.0151784	0.166724	0.144718		5.3	0.464435	0.472503	-0.0669502	0.0348724	-0.0234787	0.110068	0.118592
5.30333	0.188973	0.254246	0.0374294	0.0673309	-0.0141416	0.163493	0.144568		5.30333	0.468541	0.478396	-0.0663581	0.0373302	-0.0279982	0.110631	0.126922
5.30667	0.186241	0.254599	0.039213	0.064674	-0.0133382	0.167545	0.142088		5.30667	0.464586	0.471283	-0.0700921	0.0328581	-0.0279587	0.109256	0.119012
5.31	0.184426	0.257053	0.0380975	0.0647622	-0.0118856	0.16515	0.149616		5.31	0.466427	0.467928	-0.072536	0.0366573	-0.0285642	0.110878	0.121028
5.31333	0.183414	0.252905	0.0366898	0.0672939	-0.015772	0.166476	0.140324		5.31333	0.463714	0.475697	-0.0727806	0.0337844	-0.0265018	0.110501	0.12314
5.31667	0.186974	0.257714	0.0374091	0.0661824	-0.00990271	0.168211	0.145699		5.31667	0.464044	0.465351	-0.0671791	0.033933	-0.0240575	0.110094	0.118767
5.32	0.183911	0.254074	0.0412258	0.0635088	-0.00834799	0.168059	0.139293		5.32	0.466144	0.476229	-0.0674319	0.0286397	-0.0221461	0.11008	0.123038
5.32333	0.183993	0.251971	0.0398301	0.0652751	-0.014055	0.163275	0.142703		5.32333	0.467187	0.472952	-0.0665103	0.0315559	-0.0293813	0.111518	0.120174
5.32667	0.185903	0.259932	0.0364312	0.0654917	-0.0120795	0.167094	0.145389		5.32667	0.463582	0.471351	-0.0695537	0.0335189	-0.0204682	0.115013	0.119631
5.33	0.183739	0.252163	0.0405384	0.0682955	-0.0119364	0.167813	0.139258		5.33	0.466849	0.475325	-0.0695395	0.0319657	-0.0214444	0.107826	0.122594
5.33333	0.189415	0.256852	0.0388578	0.064901	-0.0157945	0.160359	0.140429		5.33333	0.463762	0.471251	-0.0693381	0.0334004	-0.0264271	0.11266	0.117407
5.33667	0.183758	0.257574	0.0397016	0.0651419	-0.0121044	0.167179	0.139217		5.33667	0.464574	0.472645	-0.0710796	0.0295597	-0.0317139	0.112907	0.123732
5.34	0.187672	0.258269	0.0383909	0.0673777	-0.0146768	0.16745	0.146422		5.34	0.463374	0.468531	-0.0670288	0.0332474	-0.0311004	0.113086	0.124825
5.34333	0.187954	0.253302	0.0361011	0.0657878	-0.0137142	0.166882	0.144974		5.34333	0.461776	0.470155	-0.070352	0.0359005	-0.0289458	0.11059	0.124851
5.34667	0.185264	0.25755	0.0385333	0.0650615	-0.0128879	0.165608	0.143457		5.34667	0.464786	0.470096	-0.070841	0.0276251	-0.0267862	0.112203	0.119378
5.35	0.188261	0.253152	0.0401955	0.0679254	-0.0105006	0.167262	0.141911		5.35	0.460028	0.472627	-0.0697071	0.0342298	-0.0226138	0.114021	0.12337
5.35333	0.18666	0.255618	0.0389046	0.0674102	-0.0104753	0.165066	0.143488		5.35333	0.459779	0.472897	-0.0665267	0.031861	-0.0275466	0.111258	0.12115
5.35667	0.187634	0.257279	0.0375014	0.070714	-0.012596	0.168288	0.145443		5.35667	0.463889	0.473859	-0.0691543	0.0317212	-0.0255799	0.110034	0.119349
5.36	0.184352	0.254441	0.0361464	0.0668288	-0.00925537	0.164258	0.149032		5.36	0.459025	0.467094	-0.0717338	0.0352293	-0.0245632	0.110222	0.123314
5.36333	0.185403	0.25514	0.0416741	0.0689406	-0.0127415	0.169234	0.140098		5.36333	0.46142	0.470664	-0.06812	0.0369965	-0.0271744	0.11402	0.120774
5.36667	0.191215	0.257348	0.0400837	0.0646298	-0.0122385	0.171681	0.1476		5.36667	0.462809	0.468995	-0.0672308	0.0332859	-0.0245882	0.112344	0.122318
5.37	0.188672	0.253178	0.0383112	0.0603269	-0.0131993	0.164717	0.144951		5.37	0.461375	0.469748	-0.0706996	0.0309568	-0.0216209	0.109936	0.122537
5.37333	0.188515	0.255907	0.0387022	0.0685424	-0.0129131	0.167045	0.146429		5.37333	0.469241	0.471925	-0.0722698	0.0359493	-0.0253425	0.11378	0.118919
5.37667	0.186851	0.255522	0.0375997	0.0683516	-0.0116053	0.167186	0.142562		5.37667	0.461261	0.468959	-0.0733716	0.035916	-0.0235946	0.112485	0.118824
5.38	0.187655	0.252337	0.0388758	0.067335	-0.0151318	0.166946	0.144137		5.38	0.463039	0.471543	-0.0695186	0.0335354	-0.0220719	0.112012	0.124676
5.38333	0.189356	0.252176	0.0357959	0.0650676	-0.0129182	0.169185	0.142119		5.38333	0.461935	0.468836	-0.0749497	0.0351784	-0.0237068	0.113353	0.125898
5.38667	0.185855	0.258872	0.0393519	0.0654015	-0.0182961	0.166014	0.146274		5.38667	0.464988	0.470792	-0.0705086	0.0339951	-0.0248643	0.117181	0.12521
5.39	0.184079	0.257095	0.0398602	0.0676398	-0.00994399	0.165686	0.14068		5.39	0.465561	0.473132	-0.0689464	0.0344393	-0.0238485	0.114051	0.120254
5.39333	0.185787	0.253419	0.0363953	0.0642902	-0.0112858	0.169101	0.142915		5.39333	0.468173	0.466557	-0.0700067	0.0334984	-0.024081	0.113057	0.1238
5.39667	0.184104	0.256413	0.0353371	0.0676346	-0.011803	0.170861	0.144162		5.39667	0.46294	0.470022	-0.0686175	0.0339595	-0.0242865	0.114676	0.120685
5.4	0.187793	0.25379	0.0362212	0.0649165	-0.0145822	0.16823	0.141153		5.4	0.467005	0.466126	-0.0723539	0.0292437	-0.026044	0.11432	0.124394
5.40333	0.185718	0.259131	0.0352128	0.0637411	-0.0177199	0.169807	0.148694		5.40333	0.459665	0.46785	-0.0728362	0.034105	-0.0235539	0.114467	0.123323
5.40667	0.185979	0.255114	0.0357914	0.0661941	-0.0112327	0.169889	0.142844		5.40667	0.463658	0.469931	-0.0698975	0.0328609	-0.0221277	0.112821	0.122039
5.41	0.18491	0.252774	0.0328268	0.0642479	-0.0160017	0.164945	0.140538		5.41	0.463997	0.466714	-0.0748319	0.0368433	-0.0222682	0.110248	0.127132
5.41333	0.184112	0.255117	0.0370089	0.0692838	-0.0110489	0.168241	0.146337		5.41333	0.467663	0.467674	-0.0683637	0.0328823	-0.0247004	0.117372	0.123806
5.41667	0.18915	0.253021	0.0408027	0.0648726	-0.0126049	0.16964	0.143102		5.41667	0.46071	0.46765	-0.0693129	0.0328163	-0.0247886	0.114493	0.121903
5.42	0.186101	0.256757	0.0378591	0.0654509	-0.0155031	0.17189	0.144474		5.42	0.462356	0.471602	-0.0671062	0.0326745	-0.0270859	0.111611	0.124028
5.42333	0.18746	0.256218	0.0393133	0.0659308	-0.0105947	0.170649	0.146194		5.42333	0.463362	0.469281	-0.0669291	0.0289547	-0.0243989	0.112498	0.12608
5.42667	0.186928	0.252651	0.0388032	0.0654804	-0.0162183	0.172757	0.143286		5.42667	0.458387	0.468503	-0.0731682	0.0297	-0.0282252	0.111355	0.120497
5.43	0.187218	0.255043	0.0401865	0.0605084	-0.0157858	0.166281	0.144766		5.43	0.461	0.473694	-0.0690578	0.0297007	-0.0218819	0.111223	0.122588
5.43333	0.182306	0.250301	0.0360842	0.0606509	-0.0147867	0.169591	0.146449		5.43333	0.461437	0.464531	-0.0720323	0.0308832	-0.0274545	0.118488	0.123854
5.43667	0.187368	0.251451	0.044556	0.0680611	-0.0147762	0.170272	0.146408		5.43667	0.459922	0.468793	-0.0711291	0.0338571	-0.0264984	0.112393	0.12763
5.44	0.190064	0.253556	0.0396644	0.0642404	-0.0144759	0.169603	0.146909		5.44	0.463029	0.467195	-0.0715717	0.0288657	-0.0222567	0.111703	0.126281
5.44333	0.188241	0.254572	0.0369911	0.0696498	-0.0130879	0.170575	0.143008		5.44333	0.456312	0.470189	-0.0732073	0.0347134	-0.0239205	0.10706	0.121999
5.44667	0.189028	0.259341	0.037058	0.0640281	-0.0153702	0.171627	0.141473		5.44667	0.460757	0.467784	-0.0726887	0.0318244	-0.0239529	0.112891	0.1258
5.45	0.188364	0.257145	0.040746	0.0649518	-0.0135035	0.168939	0.144068		5.45	0.465945	0.470857	-0.0696712	0.0315238	-0.0257904	0.1151	0.127821
5.45333	0.18867	0.255044	0.0362649	0.0665908	-0.016494	0.169977	0.146924		5.45333	0.458724	0.472848	-0.0753657	0.0296367	-0.0306579	0.111126	0.123861
5.45667	0.185544	0.254045	0.0389324	0.0684257	-0.0166835	0.164694	0.143038		5.45667	0.461825	0.471224	-0.0683228	0.0339044	-0.0206675	0.112559	0.127567
5.46	0.188084	0.255527	0.034073	0.0665031	-0.0140396	0.166593	0.145116		5.46	0.46098	0.471531	-0.0730007	0.0328023	-0.0263802	0.108181	0.124517
5.46333	0.185024	0.254744	0.0406272	0.0659696	-0.0155744	0.167735	0.144974		5.46333	0.458852	0.465135	-0.0748761	0.035415	-0.0230596	0.108585	0.122876
5.46667	0.184931	0.252006	0.0377471	0.0663266	-0.0163114	0.170193	0.14491		5.46667	0.465163	0.465786	-0.0722843	0.0300519	-0.0255329	0.111627	0.123773
5.47	0.186564	0.251999	0.0388765	0.0691057	-0.0138822	0.170158	0.144988		5.47	0.462435	0.470686	-0.071827	0.0330568	-0.0264342	0.108971	0.126753
5.47333	0.1889	0.255345	0.0399467	0.0672448	-0.0126407	0.166126	0.142825		5.47333	0.460742	0.465506	-0.0728297	0.0361764	-0.0283334	0.11371	0.124043
5.47667	0.182612	0.257559	0.034343	0.064318	-0.0118198	0.17058	0.138154		5.47667	0.457209	0.474006	-0.0703476	0.0315596	-0.0247976	0.11416	0.124495
5.48	0.186039	0.255028	0.0338756	0.0646628	-0.0130423	0.172156	0.140494		5.48	0.461742	0.466922	-0.0697075	0.0310831	-0.0243032	0.117144	0.126447
5.48333	0.186834	0.249463	0.0385973	0.0659804	-0.0180911	0.166142	0.141251		5.48333	0.467371	0.466747	-0.068275	0.0303358	-0.027972	0.115424	0.122243
5.48667	0.18781	0.253836	0.0390998	0.0659393	-0.0118288	0.171571	0.145967		5.48667	0.462481	0.465834	-0.0690422	0.0294597	-0.0242083	0.111651	0.124122
5.49	0.188013	0.255647	0.036645	0.0630227	-0.0154459	0.164875	0.141135		5.49	0.458257	0.468971	-0.0722638	0.0277202	-0.0245942	0.11061	0.118833
5.49333	0.184398	0.253478	0.0411874	0.0630035	-0.0109613	0.171251	0.142939		5.49333	0.460582	0.468458	-0.070825	0.0334069	-0.027753	0.114988	0.123474
5.49667	0.186273	0.254802	0.0393074	0.0626295	-0.0110468	0.170381	0.145125		5.49667	0.461229	0.474437	-0.0771018	0.0296974	-0.0276029	0.112914	0.124559
5.5	0.185431	0.25344	0.0408526	0.0644369	-0.0185194	0.17151	0.144713		5.5	0.458328	0.466411	-0.0727742	0.0311862	-0.0212296	0.114222	0.127593
5.50333	0.187218	0.256803	0.0425465	0.0693648	-0.0140672	0.169084	0.143504		5.50333	0.46249	0.468792	-0.0730721	0.0337336	-0.0225093	0.112864	0.128322
5.50667	0.187606	0.254762	0.0351308	0.0670478	-0.0102033	0.170697	0.145926		5.50667	0.454706	0.465563	-0.0748004	0.0270061	-0.0224022	0.113699	0.121394
5.51	0.186328	0.255721	0.0433429	0.0664261	-0.0145539	0.173328	0.147702		5.51	0.460451	0.463615	-0.0742284	0.0301868	-0.0290244	0.112368	0.128306
5.51333	0.185375	0.254238	0.0373561	0.0674348	-0.0111797	0.171488	0.144608		5.51333	0.457275	0.467676	-0.0722194	0.0328767	-0.0213051	0.116321	0.122401
5.51667	0.184859	0.256792	0.0375093	0.0632278	-0.0104597	0.17013	0.146749		5.51667	0.461848	0.468331	-0.0728559	0.0285635	-0.0290862	0.112359	0.126325
5.52	0.187672	0.259714	0.0377355	0.0623829	-0.014482	0.169374	0.1467		5.52	0.457199	0.462444	-0.0737687	0.0306246	-0.0227519	0.112742	0.123871
5.52333	0.186684	0.255287	0.0357656	0.064587	-0.0114619	0.168557	0.146256		5.52333	0.462213	0.469484	-0.0720252	0.0348387	-0.0225829	0.116221	0.12451
5.52667	0.183565	0.255736	0.0383451	0.0635988	-0.012587	0.166538	0.148717		5.52667	0.45761	0.468144	-0.0749156	0.0229148	-0.0246579	0.113842	0.130634
5.53	0.184659	0.256447	0.0387116	0.0647618	-0.014366	0.171243	0.142622		5.53	0.460939	0.461894	-0.0751633	0.0325905	-0.0254104	0.113599	0.122193
5.53333	0.186865	0.254065	0.0404803	0.0675203	-0.0152436	0.170605	0.148979		5.53333	0.458611	0.463763	-0.0740689	0.0310529	-0.0271875	0.115591	0.12929
5.53667	0.187616	0.258375	0.0396415	0.0627932	-0.0114651	0.171146	0.146929		5.53667	0.45634	0.466258	-0.0757787	0.0290286	-0.0271053	0.114174	0.116829
5.54	0.18545	0.254537	0.0412158	0.0676315	-0.0120063	0.171522	0.148792		5.54	0.457586	0.465838	-0.0728912	0.0302198	-0.024872	0.115958	0.126315
5.54333	0.185067	0.254695	0.0388227	0.0617406	-0.0131921	0.168077	0.149016		5.54333	0.462773	0.471354	-0.0722237	0.032659	-0.030052	0.11449	0.127987
5.54667	0.188346	0.255152	0.041912	0.0687884	-0.0166587	0.169936	0.141152		5.54667	0.456968	0.467859	-0.0691049	0.029754	-0.0289512	0.111641	0.127194
5.55	0.187067	0.253297	0.0359767	0.0656086	-0.015757	0.172422	0.148548		5.55	0.458381	0.466028	-0.0739876	0.0308834	-0.0269055	0.114308	0.124976
5.55333	0.184102	0.254952	0.0389064	0.0650776	-0.0105203	0.168931	0.145113		5.55333	0.462412	0.467087	-0.0700787	0.0321799	-0.0299429	0.112101	0.124063
5.55667	0.18358	0.256511	0.0379181	0.0671565	-0.012651	0.167923	0.149835		5.55667	0.456713	0.468566	-0.072074	0.0339484	-0.0281579	0.11717	0.12661
5.56	0.185143	0.256385	0.0422304	0.0659757	-0.0144668	0.172325	0.144011		5.56	0.457163	0.469101	-0.0810659	0.0295102	-0.0247102	0.111157	0.126734
5.56333	0.18815	0.251472	0.0398916	0.0643198	-0.0134493	0.171842	0.145301		5.56333	0.460789	0.465658	-0.0713156	0.03048	-0.0220961	0.113521	0.125975
5.56667	0.184419	0.255693	0.0426714	0.0642222	-0.0124744	0.171339	0.144381		5.56667	0.45901	0.470641	-0.0705545	0.0267581	-0.0313123	0.120512	0.126154
5.57	0.187337	0.256627	0.0378009	0.0693086	-0.0172802	0.169238	0.143319		5.57	0.459522	0.466554	-0.0759863	0.0295478	-0.0249396	0.113777	0.125618
5.57333	0.186621	0.256297	0.0432061	0.0668698	-0.0183226	0.171345	0.151706		5.57333	0.458791	0.467987	-0.0725565	0.0262711	-0.0239846	0.11687	0.126533
5.57667	0.188635	0.253601	0.0340331	0.0653709	-0.0159523	0.17406	0.143282		5.57667	0.461594	0.466654	-0.077548	0.030335	-0.0265886	0.114399	0.12319
5.58	0.186775	0.255362	0.0399713	0.0686467	-0.0136144	0.167729	0.146809		5.58	0.456863	0.467451	-0.0752306	0.0311908	-0.0248877	0.118354	0.124756
5.58333	0.18465	0.252143	0.0396994	0.0673897	-0.00829235	0.170756	0.148944		5.58333	0.45947	0.467918	-0.0773267	0.0307748	-0.0258403	0.11618	0.123965
5.58667	0.183947	0.257518	0.0395073	0.0649578	-0.0122725	0.168472	0.145482		5.58667	0.457043	0.463187	-0.0722934	0.030501	-0.0259398	0.115748	0.126275
5.59	0.185548	0.253982	0.0368973	0.062628	-0.0176213	0.170023	0.14738		5.59	0.456518	0.47046	-0.0712596	0.0252346	-0.0282848	0.113329	0.125362
5.59333	0.188696	0.257427	0.038337	0.0678242	-0.0138845	0.166439	0.142745		5.59333	0.458858	0.470584	-0.072563	0.0278321	-0.0262324	0.114295	0.126741
5.59667	0.186806	0.260809	0.0345312	0.066818	-0.0167989	0.172266	0.144426		5.59667	0.461662	0.465059	-0.07606	0.0270997	-0.0231771	0.113105	0.12636
5.6	0.184398	0.256522	0.0380581	0.0629497	-0.0139702	0.171471	0.149813		5.6	0.463144	0.462496	-0.0739046	0.0274511	-0.0248263	0.112836	0.125878
5.60333	0.186563	0.257603	0.0347455	0.0681897	-0.0142416	0.176045	0.146846		5.60333	0.462066	0.467363	-0.0787574	0.0296564	-0.0244492	0.114435	0.129283
5.60667	0.181117	0.256971	0.0398478	0.0672982	-0.0130389	0.168754	0.147275		5.60667	0.458834	0.466535	-0.07035	0.0285947	-0.0266402	0.116149	0.124743
5.61	0.184733	0.253874	0.0365142	0.0656921	-0.0147515	0.169256	0.148186		5.61	0.459678	0.468687	-0.0730591	0.0281565	-0.0247632	0.113371	0.12596
5.61333	0.188917	0.257033	0.0380338	0.0659932	-0.0139624	0.171357	0.148457		5.61333	0.457168	0.463831	-0.0728771	0.0278118	-0.0219829	0.114871	0.125625
5.61667	0.188086	0.253772	0.0353347	0.0665266	-0.019365	0.169319	0.14791		5.61667	0.458943	0.466643	-0.0729528	0.0350623	-0.0287263	0.111086	0.12834
5.62	0.183635	0.253864	0.038776	0.0691962	-0.0130344	0.174817	0.144629		5.62	0.457067	0.462502	-0.0762845	0.0372978	-0.0291244	0.114501	0.12707
5.62333	0.190587	0.255678	0.0376464	0.058865	-0.0168452	0.173915	0.145654		5.62333	0.457788	0.46188	-0.0756105	0.0271562	-0.0244475	0.11053	0.128011
5.62667	0.186065	0.254028	0.0411437	0.0632224	-0.01327	0.173312	0.148939		5.62667	0.460554	0.462816	-0.0722205	0.0281967	-0.0222049	0.115166	0.131828
5.63	0.188209	0.260083	0.0390671	0.0701982	-0.0120702	0.168724	0.150355		5.63	0.454424	0.469397	-0.0712748	0.0255483	-0.026685	0.115189	0.126767
5.63333	0.187231	0.25567	0.0410083	0.067152	-0.0135976	0.169762	0.145945		5.63333	0.458496	0.46143	-0.0751564	0.0315697	-0.0294244	0.115725	0.129092
5.63667	0.183769	0.256488	0.0390625	0.0647234	-0.0144275	0.170356	0.149376		5.63667	0.461864	0.46052	-0.0739314	0.0329889	-0.0225856	0.112618	0.128735
5.64	0.186421	0.257044	0.0368562	0.0658628	-0.0115297	0.17093	0.149213		5.64	0.463299	0.464228	-0.0748835	0.0303664	-0.0257112	0.114311	0.128088
5.64333	0.188056	0.252401	0.0381058	0.0661443	-0.0153795	0.174561	0.141265		5.64333	0.459831	0.463589	-0.0726742	0.0294934	-0.0243567	0.112082	0.1259
5.64667	0.187762	0.25487	0.0362003	0.064017	-0.0209866	0.173816	0.14441		5.64667	0.457052	0.465661	-0.0752529	0.028945	-0.0273604	0.115313	0.123315
5.65	0.185035	0.251734	0.0386527	0.0684081	-0.0173533	0.171988	0.144505		5.65	0.458024	0.463743	-0.0752461	0.0276526	-0.0214295	0.114109	0.126375
5.65333	0.18376	0.252913	0.0338377	0.0681418	-0.0170631	0.175444	0.147414		5.65333	0.461751	0.466262	-0.0740592	0.0313728	-0.0235773	0.11389	0.125708
5.65667	0.185917	0.258714	0.0382241	0.0634936	-0.0174029	0.177596	0.147365		5.65667	0.458223	0.463973	-0.0761946	0.0268602	-0.0247779	0.115739	0.124418
5.66	0.186141	0.254597	0.03693	0.0637983	-0.0117507	0.177022	0.147514		5.66	0.461035	0.463464	-0.0744505	0.0258587	-0.0233549	0.117619	0.127731
5.66333	0.184256	0.256666	0.0382373	0.0658324	-0.0180401	0.176189	0.147378		5.66333	0.457161	0.463301	-0.0723718	0.0294959	-0.0274066	0.117957	0.127775
5.66667	0.187879	0.256577	0.0382085	0.0680395	-0.0153289	0.172038	0.146038		5.66667	0.458004	0.465875	-0.0784619	0.0282912	-0.0233357	0.116583	0.124237
5.67	0.187473	0.255293	0.0379164	0.0669017	-0.0120361	0.16748	0.150708		5.67	0.461014	0.466087	-0.0754246	0.0271828	-0.0273721	0.116739	0.125855
5.67333	0.189782	0.252269	0.0389077	0.0665173	-0.0144247	0.17307	0.14523		5.67333	0.456035	0.467193	-0.0753777	0.026748	-0.0267446	0.115856	0.124177
5.67667	0.186602	0.254899	0.0379337	0.0675964	-0.0153938	0.171887	0.149294		5.67667	0.460014	0.461762	-0.0770262	0.0288235	-0.0292453	0.116313	0.129538
5.68	0.182918	0.259097	0.0401158	0.0632678	-0.0158134	0.176461	0.144408		5.68	0.457328	0.46166	-0.0805558	0.0257298	-0.0242096	0.114575	0.124389
5.68333	0.185114	0.251616	0.0407296	0.0648584	-0.0163239	0.175927	0.148385		5.68333	0.453878	0.468102	-0.0718722	0.0260704	-0.0265257	0.11725	0.124251
5.68667	0.188882	0.255427	0.0355129	0.0659773	-0.0148344	0.169702	0.150934		5.68667	0.454091	0.460477	-0.078186	0.0256624	-0.0237848	0.119297	0.124453
5.69	0.187862	0.253274	0.039892	0.0633576	-0.0190288	0.175702	0.147929		5.69	0.460162	0.463938	-0.0738421	0.0272448	-0.0264669	0.118302	0.126571
5.69333	0.183676	0.253996	0.0340862	0.0714447	-0.0157998	0.172604	0.149693		5.69333	0.457562	0.46509	-0.0758806	0.0221442	-0.0258219	0.116405	0.126113
5.69667	0.184671	0.255816	0.0398953	0.0662513	-0.0158738	0.171321	0.1481		5.69667	0.458421	0.46317	-0.0795907	0.0257635	-0.0254984	0.115484	0.128465
5.7	0.187805	0.258553	0.0388435	0.063863	-0.0159297	0.170508	0.146698		5.7	0.459179	0.468394	-0.0755425	0.0275098	-0.0218521	0.116182	0.125186
5.70333	0.188128	0.257816	0.0386977	0.0621449	-0.0166046	0.173597	0.147312		5.70333	0.456124	0.462815	-0.0784078	0.0295111	-0.0279131	0.11447	0.124787
5.70667	0.188025	0.255367	0.0387731	0.0679932	-0.0165313	0.171141	0.147488		5.70667	0.458427	0.461072	-0.0782967	0.0225135	-0.0293443	0.119032	0.128433
5.71	0.186711	0.25533	0.0331586	0.0649632	-0.0159298	0.175346	0.143948		5.71	0.452918	0.463146	-0.0698271	0.0284364	-0.0239536	0.113319	0.125897
5.71333	0.185282	0.257326	0.0361652	0.0634664	-0.0102465	0.176262	0.145882		5.71333	0.458385	0.464962	-0.0739882	0.0315605	-0.0261463	0.118394	0.123041
5.71667	0.183259	0.257133	0.0340644	0.064744	-0.0102724	0.170098	0.148512		5.71667	0.459454	0.466122	-0.0784335	0.0309147	-0.0216477	0.115024	0.127224
5.72	0.186263	0.256488	0.0386089	0.0627517	-0.0142119	0.176571	0.149232		5.72	0.454995	0.466914	-0.0791088	0.0273791	-0.0267918	0.119808	0.12689
5.72333	0.182391	0.256275	0.0349327	0.0671709	-0.012971	0.173061	0.14445		5.72333	0.460346	0.467904	-0.0748576	0.0269882	-0.0259893	0.118627	0.133096
5.72667	0.187855	0.254398	0.0356171	0.0660807	-0.0157373	0.170807	0.147724		5.72667	0.45356	0.462354	-0.0728945	0.0277124	-0.029536	0.12246	0.129055
5.73	0.187798	0.258164	0.035399	0.0606181	-0.0163542	0.172921	0.145888		5.73	0.456825	0.46579	-0.0775667	0.0275091	-0.0271171	0.117287	0.124173
5.73333	0.187395	0.252804	0.0388757	0.0668044	-0.015977	0.173268	0.145814		5.73333	0.455622	0.461506	-0.0807619	0.025381	-0.0293658	0.113603	0.131519
5.73667	0.18487	0.256544	0.0350559	0.0660127	-0.0180744	0.178201	0.147858		5.73667	0.457671	0.463393	-0.0794481	0.025507	-0.0288551	0.116866	0.129188
5.74	0.188326	0.255329	0.0352631	0.0635687	-0.0164627	0.171615	0.145785		5.74	0.459849	0.462956	-0.0776127	0.0289362	-0.0244811	0.11855	0.123622
5.74333	0.185228	0.254948	0.0366793	0.0654256	-0.014524	0.172424	0.147658		5.74333	0.451968	0.462407	-0.0758823	0.0271002	-0.0306579	0.118682	0.128606
5.74667	0.190058	0.256636	0.0391504	0.0638645	-0.0156199	0.173476	0.146629		5.74667	0.456324	0.46244	-0.0752408	0.0265499	-0.0276011	0.11607	0.125228
5.75	0.18441	0.2542	0.0373532	0.0624101	-0.0146127	0.177735	0.148377		5.75	0.45194	0.461178	-0.0803724	0.0276527	-0.0261249	0.120727	0.127419
5.75333	0.184405	0.258893	0.0352855	0.0623549	-0.0119372	0.175394	0.148994		5.75333	0.458062	0.464015	-0.080391	0.0281269	-0.0265819	0.116945	0.129091
5.75667	0.187534	0.255416	0.0387852	0.0697562	-0.0174446	0.173427	0.154206		5.75667	0.452561	0.463117	-0.0746515	0.0300386	-0.0253403	0.116305	0.130091
5.76	0.186959	0.25434	0.0363618	0.0626559	-0.0114212	0.17812	0.149891		5.76	0.458768	0.461477	-0.0792319	0.0244115	-0.029591	0.120678	0.129507
5.76333	0.184284	0.255195	0.0384448	0.0682787	-0.0161288	0.173252	0.146673		5.76333	0.457914	0.463134	-0.0763517	0.0276782	-0.0287979	0.120212	0.128807
5.76667	0.182597	0.255301	0.0369907	0.0668108	-0.00985682	0.175498	0.15382		5.76667	0.454033	0.46284	-0.0748356	0.0295471	-0.0264322	0.113671	0.127073
5.77	0.181295	0.256465	0.0382388	0.0635789	-0.0131193	0.1778	0.148377		5.77	0.45249	0.461373	-0.082229	0.0248435	-0.0258804	0.112465	0.131398
5.77333	0.186739	0.253227	0.0401542	0.0630613	-0.0149667	0.175407	0.14851		5.77333	0.455957	0.460007	-0.0722207	0.0302001	-0.0263344	0.117153	0.128855
5.77667	0.189883	0.253778	0.0403606	0.0660704	-0.011788	0.173693	0.150246		5.77667	0.454461	0.461589	-0.0755005	0.0265827	-0.0246505	0.11912	0.128634
5.78	0.180067	0.256818	0.0399551	0.0632924	-0.0126502	0.177135	0.15413		5.78	0.453193	0.463354	-0.0755817	0.0285501	-0.0261178	0.11712	0.126795
5.78333	0.184236	0.257107	0.0384864	0.0644345	-0.0140842	0.173322	0.150241		5.78333	0.453228	0.462042	-0.0778588	0.0282398	-0.0277631	0.113019	0.132421
5.78667	0.184594	0.255054	0.0356629	0.0640101	-0.0169681	0.175416	0.145632		5.78667	0.456834	0.464361	-0.0796472	0.0259462	-0.0260782	0.115864	0.132515
5.79	0.188646	0.251659	0.0340167	0.0635053	-0.0157423	0.174467	0.151519		5.79	0.455516	0.464163	-0.0778074	0.0254648	-0.0260189	0.114899	0.129546
5.79333	0.187611	0.258095	0.0386366	0.066956	-0.0187422	0.173164	0.151937		5.79333	0.456122	0.46006	-0.0758613	0.0279309	-0.024326	0.118315	0.12787
5.79667	0.183601	0.253243	0.0394181	0.0619691	-0.0160769	0.177033	0.145167		5.79667	0.452586	0.465198	-0.0758229	0.0320586	-0.0315764	0.118557	0.132128
5.8	0.182887	0.258905	0.0345479	0.065766	-0.0153905	0.170979	0.148671		5.8	0.456512	0.45915	-0.0759648	0.023094	-0.0245717	0.114646	0.127334
5.80333	0.1834	0.253108	0.0385971	0.0646131	-0.0176662	0.176995	0.149626		5.80333	0.456103	0.460505	-0.0763927	0.0268272	-0.0236842	0.120111	0.131516
5.80667	0.186224	0.254618	0.0355179	0.0671772	-0.0156601	0.176443	0.150188		5.80667	0.454463	0.457445	-0.0747843	0.0298021	-0.0251121	0.118907	0.128647
5.81	0.183244	0.25629	0.0384666	0.0602478	-0.0203681	0.177836	0.147224		5.81	0.454958	0.461624	-0.0770326	0.0252065	-0.025815	0.120333	0.130663
5.81333	0.182457	0.25305	0.0363879	0.0620643	-0.0189097	0.174783	0.148736		5.81333	0.453872	0.459778	-0.0753483	0.0303933	-0.027514	0.117809	0.131444
5.81667	0.18737	0.257833	0.0415503	0.0633183	-0.0159353	0.175638	0.15456		5.81667	0.456732	0.461052	-0.0746875	0.0249549	-0.0266906	0.117176	0.126812
5.82	0.186103	0.25675	0.0382882	0.064516	-0.0152799	0.177861	0.146194		5.82	0.452526	0.462917	-0.0755546	0.0280158	-0.026894	0.117151	0.133689
5.82333	0.184098	0.255325	0.0372294	0.0663375	-0.0142575	0.179123	0.148687		5.82333	0.452173	0.460735	-0.0764013	0.0241471	-0.0266364	0.120469	0.127303
5.82667	0.184231	0.253377	0.0360444	0.0638157	-0.0141756	0.170843	0.152233		5.82667	0.454939	0.463016	-0.0750297	0.0271097	-0.028979	0.119173	0.135553
5.83	0.183879	0.258368	0.0377308	0.0630706	-0.0156611	0.177156	0.151313		5.83	0.454016	0.45983	-0.0775399	0.0263819	-0.0254005	0.114685	0.125812
5.83333	0.187721	0.25469	0.0372981	0.0642135	-0.0157368	0.174178	0.146999		5.83333	0.457979	0.46178	-0.0755751	0.0271666	-0.0270733	0.117569	0.127316
5.83667	0.186653	0.257135	0.0334144	0.0597674	-0.0131793	0.173775	0.153024		5.83667	0.451341	0.464285	-0.0760232	0.0302308	-0.0300563	0.121818	0.130765
5.84	0.186638	0.253729	0.0352378	0.0603356	-0.0122326	0.176219	0.151432		5.84	0.452587	0.456796	-0.0798544	0.0252176	-0.0277403	0.119447	0.129115
5.84333	0.185313	0.252639	0.0321847	0.0637518	-0.0148971	0.170036	0.151156		5.84333	0.454096	0.459576	-0.0741639	0.0268372	-0.0261584	0.121287	0.12721
5.84667	0.187017	0.256779	0.0379921	0.0657558	-0.013704	0.176693	0.146513		5.84667	0.453056	0.460968	-0.076273	0.0227487	-0.0252323	0.118671	0.128403
5.85	0.182213	0.256417	0.0359704	0.0688244	-0.017149	0.177358	0.150336		5.85	0.455385	0.461316	-0.0776143	0.0306494	-0.0257539	0.116251	0.126857
5.85333	0.185226	0.255218	0.0391569	0.0680797	-0.0152719	0.17852	0.153976		5.85333	0.451392	0.458554	-0.0795975	0.0244869	-0.0253862	0.120233	0.130326
5.85667	0.186909	0.25456	0.0345404	0.0626822	-0.0128092	0.178359	0.149186		5.85667	0.453376	0.459726	-0.0746921	0.0250689	-0.0263866	0.118814	0.130919
5.86	0.188897	0.250928	0.0367021	0.0643887	-0.0138898	0.175177	0.14542		5.86	0.45487	0.460714	-0.0756971	0.0261756	-0.0276776	0.117521	0.130605
5.86333	0.180797	0.253941	0.0398843	0.0654571	-0.0113833	0.17558	0.152374		5.86333	0.455333	0.460792	-0.0761671	0.0305551	-0.0296308	0.118659	0.12988
5.86667	0.186485	0.256685	0.0379894	0.0629375	-0.0131001	0.17758	0.150343		5.86667	0.449518	0.459806	-0.0760612	0.0264875	-0.029662	0.116798	0.128655
5.87	0.184282	0.25485	0.0378212	0.0627895	-0.0134915	0.178153	0.147871		5.87	0.448952	0.463132	-0.0801046	0.0261651	-0.0277602	0.115666	0.123328
5.87333	0.184872	0.25704	0.0354721	0.0662478	-0.0155313	0.178432	0.153034		5.87333	0.456032	0.457438	-0.0812614	0.0253139	-0.0287449	0.114141	0.128175
5.87667	0.188589	0.257177	0.0358444	0.0652715	-0.0198838	0.177868	0.152513		5.87667	0.454939	0.458212	-0.0771876	0.0271251	-0.0297052	0.118307	0.129388
5.88	0.182095	0.257332	0.0353738	0.0689572	-0.013846	0.176459	0.150221		5.88	0.45369	0.459387	-0.0800808	0.0256511	-0.024796	0.121971	0.12788
5.88333	0.186621	0.253144	0.0352017	0.0672741	-0.0162961	0.176042	0.153335		5.88333	0.451978	0.460996	-0.0778579	0.0274443	-0.0208125	0.124396	0.132903
5.88667	0.185948	0.256769	0.0420179	0.0653299	-0.0163148	0.177295	0.149316		5.88667	0.4539	0.457564	-0.0823098	0.0248734	-0.0284221	0.122102	0.13011
5.89	0.184227	0.255273	0.0407533	0.0624091	-0.0115781	0.177299	0.147868		5.89	0.452932	0.456295	-0.0794045	0.0236394	-0.0284269	0.121369	0.129548
5.89333	0.18907	0.255691	0.0385876	0.0685765	-0.0143818	0.178106	0.148962		5.89333	0.45657	0.464751	-0.0813813	0.02693	-0.0262652	0.12318	0.131057
5.89667	0.184949	0.254894	0.0371501	0.0652965	-0.0172244	0.175755	0.153002		5.89667	0.456346	0.463261	-0.0762878	0.0265479	-0.0268172	0.123089	0.127059
5.9	0.18645	0.255403	0.0378797	0.068351	-0.0119945	0.176349	0.153291		5.9	0.448544	0.461911	-0.0777635	0.0294557	-0.0287249	0.119027	0.127601
5.90333	0.188625	0.256432	0.0362192	0.0693226	-0.0143008	0.17222	0.152075		5.90333	0.453131	0.456455	-0.0751239	0.0284401	-0.0278002	0.121265	0.13734
5.90667	0.184529	0.256164	0.0382683	0.0634605	-0.0139327	0.181661	0.153807		5.90667	0.452397	0.459091	-0.0790187	0.0268638	-0.0255823	0.118499	0.128252
5.91	0.184044	0.25539	0.0366539	0.0704567	-0.0166788	0.173429	0.150137		5.91	0.449955	0.461869	-0.0799255	0.026808	-0.0296494	0.116503	0.12645
5.91333	0.181229	0.249254	0.0399782	0.0666707	-0.0117637	0.17439	0.144968		5.91333	0.451033	0.457216	-0.0801127	0.0317354	-0.0296987	0.117778	0.132617
5.91667	0.185502	0.25625	0.0410258	0.0655262	-0.0107285	0.174892	0.152404		5.91667	0.452468	0.455601	-0.0794278	0.0248942	-0.0276736	0.11675	0.132058
5.92	0.185578	0.257697	0.0384427	0.0644987	-0.0155522	0.176252	0.147742		5.92	0.453362	0.461141	-0.0810916	0.028524	-0.0258348	0.115238	0.13015
5.92333	0.1859	0.25688	0.0380822	0.0639939	-0.0152655	0.177236	0.152557		5.92333	0.45298	0.460627	-0.0798157	0.0250604	-0.025962	0.118913	0.132415
5.92667	0.184262	0.254204	0.0334507	0.0651033	-0.0172204	0.176447	0.153235		5.92667	0.44818	0.45678	-0.0863533	0.0234735	-0.0225362	0.120238	0.133739
5.93	0.185851	0.254925	0.0400865	0.0644756	-0.0202754	0.18168	0.146398		5.93	0.45009	0.458172	-0.0747789	0.0253364	-0.0301791	0.117361	0.131428
5.93333	0.184911	0.258433	0.0352913	0.0633403	-0.00988117	0.17827	0.147509		5.93333	0.451436	0.45697	-0.0792996	0.0231036	-0.0283435	0.122134	0.133264
5.93667	0.183777	0.258134	0.0399055	0.067244	-0.0138612	0.176176	0.146713		5.93667	0.452209	0.460424	-0.0759566	0.027333	-0.028982	0.119299	0.129829
5.94	0.184094	0.252805	0.0366243	0.0656396	-0.0131402	0.178203	0.149881		5.94	0.451731	0.459427	-0.0817817	0.0258122	-0.0259212	0.118868	0.134552
5.94333	0.185964	0.253349	0.0400321	0.0643711	-0.014363	0.176254	0.153168		5.94333	0.452283	0.457119	-0.0783795	0.0286049	-0.0285444	0.116502	0.132321
5.94667	0.182583	0.254776	0.0365421	0.0658352	-0.0191619	0.178352	0.148115		5.94667	0.449898	0.451597	-0.0784972	0.0259772	-0.0274201	0.120417	0.132999
5.95	0.186223	0.256623	0.034875	0.0625913	-0.012239	0.179009	0.151071		5.95	0.452363	0.458162	-0.0773942	0.0263057	-0.0281797	0.115998	0.13167
5.95333	0.185833	0.254306	0.0349055	0.0667157	-0.016463	0.178203	0.149195		5.95333	0.448753	0.464825	-0.0809433	0.0226806	-0.0292261	0.121087	0.133673
5.95667	0.182739	0.258493	0.0386235	0.0652143	-0.0164176	0.179448	0.144766		5.95667	0.45125	0.458149	-0.079929	0.0253279	-0.0269821	0.119411	0.129649
5.96	0.188644	0.259067	0.0378327	0.064877	-0.0106362	0.177537	0.149316		5.96	0.450876	0.459343	-0.0814582	0.0271067	-0.027788	0.121332	0.126715
5.96333	0.182253	0.259298	0.0351324	0.0672884	-0.0183676	0.179062	0.149367		5.96333	0.454871	0.457354	-0.0811693	0.0267477	-0.0286137	0.118637	0.131899
5.96667	0.186655	0.258612	0.0380265	0.0661711	-0.0183589	0.179764	0.151555		5.96667	0.453316	0.454618	-0.0793452	0.0247072	-0.0258107	0.120313	0.132641
5.97	0.178643	0.259462	0.0351992	0.0627641	-0.0151241	0.178787	0.149938		5.97	0.45038	0.457309	-0.0809523	0.0260871	-0.0297335	0.119137	0.131253
5.97333	0.180763	0.255845	0.0392625	0.065445	-0.0141173	0.178535	0.149859		5.97333	0.45366	0.456465	-0.0795654	0.0231354	-0.0280608	0.122287	0.132051
5.97667	0.181199	0.256338	0.0402618	0.0626242	-0.0144181	0.176686	0.153751		5.97667	0.450578	0.454086	-0.0789614	0.0260952	-0.0266869	0.122292	0.129392
5.98	0.183607	0.257728	0.0441981	0.0656037	-0.0139771	0.176724	0.153277		5.98	0.450565	0.456782	-0.0782271	0.0268522	-0.0286566	0.116115	0.1332
5.98333	0.186329	0.252719	0.0351229	0.0680591	-0.0155519	0.178319	0.152298		5.98333	0.448226	0.458007	-0.0833431	0.0275102	-0.0291054	0.119038	0.131355
5.98667	0.183936	0.253372	0.038376	0.0649297	-0.016479	0.179304	0.147911		5.98667	0.450525	0.456063	-0.0802697	0.0227931	-0.0291169	0.122628	0.132604
5.99	0.184314	0.259193	0.0407503	0.0662043	-0.0137109	0.173825	0.151156		5.99	0.455292	0.45978	-0.0792945	0.0269526	-0.0316553	0.119106	0.133806
5.99333	0.185904	0.257022	0.0326705	0.067964	-0.0150886	0.180426	0.152532		5.99333	0.452008	0.455057	-0.0803166	0.0235678	-0.0246333	0.121181	0.132868
5.99667	0.184633	0.260866	0.035764	0.065022	-0.0137035	0.175505	0.150623		5.99667	0.453873	0.462059	-0.0823389	0.0236712	-0.0298991	0.123147	0.128654
6	0.181331	0.2568	0.0397951	0.0624983	-0.016055	0.183518	0.152831		6	0.451221	0.462822	-0.0793895	0.0253797	-0.0273726	0.122364	0.132064
6.00333	0.186194	0.259289	0.0356186	0.0629924	-0.0138606	0.174418	0.151846		6.00333	0.450623	0.459253	-0.078106	0.023939	-0.0212187	0.121324	0.130437
6.00667	0.189447	0.256283	0.0375205	0.0622485	-0.0116917	0.17765	0.151617		6.00667	0.447691	0.457557	-0.0806524	0.0279628	-0.0287926	0.125294	0.132835
6.01	0.185651	0.261	0.0343377	0.0656245	-0.0130068	0.175196	0.150855		6.01	0.451426	0.458375	-0.083911	0.0202649	-0.0270302	0.12456	0.129409
6.01333	0.185991	0.254551	0.0355351	0.0641795	-0.0159317	0.181738	0.15322		6.01333	0.450248	0.454354	-0.0819034	0.0245467	-0.0293634	0.127212	0.129692
6.01667	0.186613	0.257155	0.0366667	0.0656689	-0.0186356	0.177546	0.152036		6.01667	0.44815	0.461327	-0.081136	0.0245655	-0.0245759	0.122814	0.135599
6.02	0.186187	0.254683	0.0335861	0.0664786	-0.0127971	0.181638	0.149146		6.02	0.449853	0.457362	-0.0766662	0.0196697	-0.0235804	0.125435	0.130546
6.02333	0.183241	0.253531	0.0372687	0.0630825	-0.0147129	0.182544	0.146248		6.02333	0.447086	0.455659	-0.0791983	0.0265178	-0.0288099	0.119822	0.128105
6.02667	0.184161	0.257832	0.0350557	0.0627679	-0.0148829	0.177388	0.154249		6.02667	0.452992	0.454381	-0.081343	0.0225606	-0.0262685	0.115771	0.131394
6.03	0.183138	0.256517	0.0383417	0.064611	-0.0165923	0.182271	0.152863		6.03	0.452087	0.459375	-0.0831741	0.0210741	-0.0301679	0.12125	0.134187
6.03333	0.183888	0.255524	0.03589	0.0645785	-0.0160446	0.179367	0.153209		6.03333	0.4462	0.456855	-0.0801255	0.0225761	-0.0274919	0.123554	0.134461
6.03667	0.182311	0.25455	0.0332266	0.0626141	-0.0140697	0.176048	0.149464		6.03667	0.4524	0.454515	-0.0797547	0.0208898	-0.0285461	0.122969	0.136291
6.04	0.186149	0.257867	0.0419014	0.0682653	-0.0142643	0.180664	0.154385		6.04	0.448713	0.455838	-0.0817644	0.0235609	-0.0234818	0.121953	0.132449
6.04333	0.185133	0.257781	0.0381387	0.0634651	-0.0133641	0.175494	0.147096		6.04333	0.450259	0.452367	-0.0826705	0.0233389	-0.0298106	0.125778	0.136075
6.04667	0.183068	0.255287	0.0370499	0.0638972	-0.0151272	0.180582	0.152912		6.04667	0.44815	0.454485	-0.0797812	0.0215816	-0.0279139	0.118943	0.131842
6.05	0.179011	0.256214	0.0347918	0.0661451	-0.0184236	0.180447	0.152598		6.05	0.447195	0.454455	-0.078266	0.0271052	-0.0292002	0.12526	0.129778
6.05333	0.186328	0.253474	0.0399305	0.061342	-0.0121922	0.182277	0.151549		6.05333	0.448356	0.458638	-0.0750227	0.0187217	-0.0266734	0.119303	0.135671
6.05667	0.182143	0.256374	0.0345091	0.0691945	-0.014697	0.177892	0.149549		6.05667	0.451068	0.451599	-0.081877	0.0248821	-0.0208312	0.116137	0.134041
6.06	0.180964	0.25831	0.0328803	0.0643448	-0.0182079	0.181998	0.150744		6.06	0.452031	0.453696	-0.0824562	0.0251665	-0.0287749	0.123517	0.130583
6.06333	0.185028	0.259994	0.0394547	0.0617074	-0.0158206	0.181373	0.147171		6.06333	0.45024	0.4583	-0.0821902	0.0250204	-0.0282925	0.122681	0.12973
6.06667	0.18498	0.25472	0.036902	0.0641901	-0.0108584	0.176581	0.150917		6.06667	0.449638	0.452802	-0.0792784	0.0268115	-0.0258147	0.117181	0.135744
6.07	0.186433	0.255188	0.0387314	0.0661835	-0.0149119	0.181117	0.150139		6.07	0.454589	0.460299	-0.0803212	0.0245968	-0.0297985	0.125315	0.132742
6.07333	0.184256	0.252426	0.035389	0.0593819	-0.0144575	0.178292	0.152313		6.07333	0.446494	0.452863	-0.0876348	0.0222293	-0.0268655	0.120059	0.13478
6.07667	0.189016	0.256624	0.0384309	0.0650204	-0.0154281	0.179311	0.152351		6.07667	0.447342	0.455721	-0.0782432	0.0255238	-0.0289893	0.124723	0.135656
6.08	0.187841	0.256233	0.0401139	0.0634841	-0.0153448	0.181126	0.151619		6.08	0.446985	0.455334	-0.0785041	0.0259263	-0.0252431	0.119235	0.132664
6.08333	0.187053	0.255454	0.0412927	0.0623893	-0.0129024	0.180345	0.150136		6.08333	0.449587	0.457127	-0.0849525	0.016696	-0.0277493	0.121815	0.132583
6.08667	0.182931	0.255384	0.0342937	0.0639071	-0.0161148	0.18051	0.151975		6.08667	0.448925	0.450375	-0.0798505	0.0206334	-0.0255777	0.119563	0.13375
6.09	0.185166	0.257542	0.0361235	0.0650191	-0.0149182	0.184315	0.149749		6.09	0.449189	0.455451	-0.0867425	0.0243765	-0.0237144	0.125797	0.135694
6.09333	0.187666	0.258423	0.0371531	0.0680142	-0.0122826	0.179142	0.151879		6.09333	0.450944	0.451935	-0.0881775	0.0268671	-0.0264617	0.12472	0.134845
6.09667	0.182858	0.253146	0.0349641	0.0652685	-0.0160423	0.180389	0.154173		6.09667	0.449383	0.453925	-0.0831049	0.0217693	-0.0276018	0.12249	0.134863
6.1	0.183078	0.257889	0.0359466	0.0625496	-0.0161366	0.177693	0.151815		6.1	0.44393	0.458908	-0.0821301	0.026028	-0.026727	0.120725	0.133495
6.10333	0.184626	0.2553	0.0342819	0.0667452	-0.0196408	0.182264	0.147308		6.10333	0.448745	0.45369	-0.0780952	0.0226859	-0.0282662	0.119666	0.134083
6.10667	0.183679	0.252955	0.0379484	0.0641123	-0.0128579	0.179335	0.150787		6.10667	0.453483	0.458439	-0.0825131	0.0267702	-0.0280276	0.123993	0.134
6.11	0.186505	0.254329	0.0323854	0.0631771	-0.0144076	0.180056	0.14578		6.11	0.449442	0.459278	-0.0852928	0.0288314	-0.0282515	0.122962	0.133974
6.11333	0.181013	0.259205	0.0375798	0.0641811	-0.0169801	0.181401	0.145423		6.11333	0.452072	0.456667	-0.0821848	0.0210408	-0.0273432	0.122887	0.132541
6.11667	0.189443	0.255885	0.0367015	0.0666299	-0.0161062	0.184107	0.151924		6.11667	0.449854	0.453166	-0.0819609	0.0267656	-0.0297463	0.124222	0.133361
6.12	0.183911	0.257177	0.0361575	0.0684575	-0.0156627	0.175122	0.152373		6.12	0.448307	0.460132	-0.0813909	0.0203546	-0.0216244	0.121488	0.133907
6.12333	0.187187	0.257019	0.0340059	0.067591	-0.0126581	0.184061	0.150942		6.12333	0.445844	0.454331	-0.0801221	0.0244419	-0.0275996	0.123704	0.140559
6.12667	0.185243	0.254245	0.0356778	0.0641639	-0.0137772	0.184351	0.152174		6.12667	0.441867	0.457269	-0.0778973	0.0208645	-0.0252633	0.122745	0.136864
6.13	0.182591	0.258799	0.0366587	0.0632056	-0.0150148	0.183965	0.151222		6.13	0.450306	0.454338	-0.0855663	0.0217172	-0.030612	0.121398	0.132052
6.13333	0.184748	0.254615	0.0365034	0.0671094	-0.013687	0.18505	0.1505		6.13333	0.447152	0.458297	-0.08194	0.02359	-0.0249807	0.126768	0.132159
6.13667	0.184855	0.256232	0.0389387	0.0699292	-0.0178003	0.181021	0.151425		6.13667	0.446952	0.455318	-0.0818117	0.0248229	-0.0238668	0.12364	0.137007
6.14	0.184884	0.258754	0.0386858	0.0620286	-0.0126742	0.182875	0.152925		6.14	0.450292	0.452953	-0.0820448	0.0231347	-0.0234643	0.12031	0.132354
6.14333	0.187325	0.25814	0.0391263	0.0653756	-0.0163892	0.183896	0.153412		6.14333	0.446403	0.451699	-0.0810788	0.0196616	-0.0283293	0.122298	0.134989
6.14667	0.185426	0.257171	0.0362671	0.0692748	-0.0160788	0.181786	0.154978		6.14667	0.449344	0.455958	-0.0794249	0.0216532	-0.0239308	0.122225	0.136745
6.15	0.186194	0.256414	0.0390353	0.0659338	-0.0132323	0.178564	0.154376		6.15	0.445982	0.454164	-0.0817954	0.0298761	-0.0295749	0.122664	0.135743
6.15333	0.185456	0.253915	0.0368006	0.0639739	-0.0141661	0.179417	0.155781		6.15333	0.450471	0.458054	-0.0810061	0.026499	-0.0299682	0.123038	0.135777
6.15667	0.183588	0.255876	0.037119	0.0683783	-0.0179145	0.180125	0.149976		6.15667	0.44811	0.453205	-0.085861	0.0199532	-0.0244743	0.120718	0.131654
6.16	0.189433	0.25784	0.0334172	0.0666964	-0.0149172	0.181893	0.153283		6.16	0.445337	0.457116	-0.0830511	0.022268	-0.028153	0.125693	0.133576
6.16333	0.181914	0.253926	0.0354248	0.0636036	-0.020132	0.178435	0.150659		6.16333	0.44603	0.452405	-0.0797089	0.0252942	-0.0276733	0.124787	0.13116
6.16667	0.185942	0.251923	0.0371385	0.0702541	-0.0146981	0.180406	0.15092		6.16667	0.448897	0.458547	-0.0800917	0.0248539	-0.0236695	0.122362	0.132629
6.17	0.182171	0.258006	0.0372555	0.0643519	-0.0142506	0.181751	0.152505		6.17	0.449786	0.455952	-0.084014	0.0232598	-0.0282005	0.121061	0.132184
6.17333	0.184086	0.256475	0.0349213	0.0695096	-0.0143003	0.181805	0.159371		6.17333	0.449305	0.452159	-0.0827574	0.0212605	-0.0290792	0.124053	0.13354
6.17667	0.182014	0.258265	0.0337189	0.0637366	-0.016772	0.181178	0.155564		6.17667	0.449517	0.451586	-0.0786308	0.0241462	-0.0260233	0.122654	0.136378
6.18	0.185461	0.261062	0.0393871	0.0678432	-0.0198181	0.183857	0.15444		6.18	0.444785	0.455143	-0.0834751	0.0255726	-0.0247941	0.124487	0.131951
6.18333	0.180765	0.255851	0.0380496	0.0645116	-0.0161387	0.181517	0.155993		6.18333	0.448219	0.454624	-0.0822745	0.0285805	-0.0256374	0.122381	0.130558
6.18667	0.183465	0.257146	0.0371772	0.0698119	-0.0144549	0.185144	0.151233		6.18667	0.447376	0.455204	-0.0824411	0.0227428	-0.0255473	0.12115	0.132637
6.19	0.184932	0.259572	0.0347509	0.0654754	-0.0177771	0.182298	0.153105		6.19	0.450256	0.452005	-0.0807676	0.0259372	-0.0261598	0.124689	0.137093
6.19333	0.187585	0.256475	0.0347322	0.0656323	-0.0161243	0.180688	0.153089		6.19333	0.453216	0.453123	-0.0870818	0.0227571	-0.0251616	0.126176	0.135616
6.19667	0.184529	0.255267	0.0362606	0.0652453	-0.013653	0.185058	0.153404		6.19667	0.443909	0.452743	-0.0852575	0.0233525	-0.0279817	0.127523	0.134265
6.2	0.180935	0.25806	0.0361023	0.0596387	-0.0158131	0.180146	0.157504		6.2	0.443054	0.451221	-0.0852001	0.0224784	-0.0316244	0.12235	0.130502
6.20333	0.183055	0.254797	0.0383639	0.0639353	-0.0159509	0.180172	0.153314		6.20333	0.445833	0.452535	-0.0837905	0.023409	-0.0278544	0.125304	0.139522
6.20667	0.185448	0.255187	0.0383154	0.0651223	-0.0163415	0.185808	0.151845		6.20667	0.446511	0.453515	-0.0802915	0.025326	-0.0303795	0.123247	0.13488
6.21	0.185243	0.254086	0.0336712	0.0641537	-0.0165023	0.180909	0.155162		6.21	0.444252	0.451693	-0.0829499	0.0216113	-0.0257543	0.125347	0.135948
6.21333	0.18568	0.258378	0.0367641	0.0610057	-0.0205821	0.181398	0.149979		6.21333	0.444695	0.456428	-0.0828536	0.0254778	-0.031805	0.124052	0.139991
6.21667	0.184426	0.256855	0.0346271	0.0654593	-0.0156225	0.186132	0.156412		6.21667	0.446642	0.45365	-0.0803237	0.0188918	-0.0233221	0.125067	0.135602
6.22	0.185602	0.260104	0.0375285	0.061918	-0.0187833	0.183085	0.154881		6.22	0.447769	0.452634	-0.0838907	0.0193198	-0.0242831	0.124576	0.136557
6.22333	0.184996	0.254578	0.0377041	0.0665152	-0.010905	0.18374	0.153731		6.22333	0.448681	0.453046	-0.0808634	0.0184201	-0.0280419	0.124919	0.136682
6.22667	0.180799	0.254598	0.0359991	0.0623923	-0.0208403	0.185768	0.156182		6.22667	0.443394	0.451993	-0.0852599	0.0258268	-0.0269079	0.121452	0.133138
6.23	0.185677	0.257935	0.0338019	0.0679892	-0.0189835	0.179789	0.153241		6.23	0.446936	0.452681	-0.0757435	0.0185688	-0.0222813	0.125457	0.138984
6.23333	0.182719	0.256527	0.0358968	0.0657578	-0.0141923	0.179616	0.152289		6.23333	0.445004	0.452751	-0.0835221	0.0255456	-0.0280931	0.122668	0.133226
6.23667	0.182991	0.258033	0.0355153	0.0638657	-0.0147038	0.179707	0.153712		6.23667	0.449232	0.450492	-0.0836771	0.0230187	-0.0286666	0.125997	0.138591
6.24	0.179982	0.255163	0.0409692	0.0681877	-0.0151795	0.184902	0.152588		6.24	0.443884	0.456048	-0.0821719	0.0212713	-0.0267736	0.119794	0.137409
6.24333	0.182706	0.256806	0.0392935	0.0610073	-0.016031	0.184091	0.151098		6.24333	0.444454	0.455583	-0.0833414	0.0234981	-0.0303569	0.125595	0.135604
6.24667	0.182367	0.258667	0.0356122	0.0639328	-0.0137991	0.185002	0.154589		6.24667	0.449423	0.453104	-0.0843262	0.0216635	-0.0259083	0.12223	0.140655
6.25	0.180975	0.261143	0.0370421	0.0656961	-0.0167318	0.183035	0.155443		6.25	0.445881	0.451318	-0.0886918	0.0264552	-0.0245945	0.131568	0.132887
6.25333	0.183154	0.256455	0.034503	0.06813	-0.0145452	0.184679	0.152384		6.25333	0.446372	0.455571	-0.0843628	0.020291	-0.031825	0.125525	0.138297
6.25667	0.185492	0.25555	0.0340988	0.0617766	-0.0178844	0.182748	0.154015		6.25667	0.44521	0.451524	-0.0810678	0.0240192	-0.0312003	0.121352	0.134189
6.26	0.183241	0.257448	0.0378185	0.0667315	-0.0139561	0.18528	0.1499		6.26	0.446348	0.453536	-0.0805084	0.0228369	-0.0289731	0.126876	0.136349
6.26333	0.181661	0.255413	0.0366381	0.0640411	-0.0118837	0.186286	0.153935		6.26333	0.445348	0.450916	-0.085505	0.0220651	-0.0295116	0.126401	0.135582
6.26667	0.185662	0.254999	0.0354763	0.0649581	-0.0156455	0.186292	0.155686		6.26667	0.446118	0.452657	-0.0827223	0.0170319	-0.0258885	0.127135	0.138362
6.27	0.185609	0.255115	0.0381012	0.0666581	-0.0187583	0.185497	0.150398		6.27	0.446198	0.451792	-0.0842432	0.0202742	-0.0254873	0.123369	0.135955
6.27333	0.183581	0.252764	0.0349967	0.0649769	-0.0146548	0.186239	0.156989		6.27333	0.445951	0.452832	-0.0863645	0.0172386	-0.0285497	0.122749	0.134094
6.27667	0.18387	0.257003	0.0354151	0.0614061	-0.0122614	0.180522	0.151421		6.27667	0.444383	0.453183	-0.0828077	0.0219031	-0.0254258	0.122146	0.133744
6.28	0.18285	0.255825	0.0410026	0.0612472	-0.0165021	0.184714	0.155087		6.28	0.44667	0.451021	-0.0816235	0.0189895	-0.0270717	0.125174	0.135571
6.28333	0.181177	0.262138	0.0349906	0.0627774	-0.0167901	0.180424	0.154738		6.28333	0.441963	0.452218	-0.0844127	0.0223017	-0.0287974	0.128287	0.137502
6.28667	0.181677	0.255431	0.0336793	0.0653075	-0.0185502	0.181938	0.154725		6.28667	0.446966	0.448964	-0.0852433	0.0234442	-0.0300311	0.123624	0.13602
6.29	0.185034	0.258434	0.0348924	0.0639741	-0.00846359	0.182463	0.151977		6.29	0.441721	0.451204	-0.0860244	0.0226734	-0.0283872	0.125446	0.140655
6.29333	0.186966	0.262104	0.0361597	0.0637786	-0.0194548	0.179606	0.156412		6.29333	0.446972	0.454065	-0.0818249	0.0243804	-0.0261555	0.125697	0.134242
6.29667	0.187021	0.259121	0.0355188	0.0643224	-0.0162249	0.183469	0.154341		6.29667	0.445474	0.451057	-0.0833702	0.0263585	-0.0277879	0.123666	0.139234
6.3	0.184551	0.256342	0.0403351	0.0662004	-0.0197898	0.181776	0.153135		6.3	0.449209	0.449023	-0.0819064	0.0262653	-0.0278751	0.123516	0.13853
6.30333	0.179408	0.256687	0.0393928	0.0621929	-0.0174611	0.18193	0.154824		6.30333	0.4508	0.452474	-0.0838346	0.0169737	-0.0269621	0.127028	0.132399
6.30667	0.184368	0.256134	0.0324168	0.0609444	-0.0178725	0.184866	0.158001		6.30667	0.445025	0.45389	-0.085488	0.0218088	-0.0316365	0.123073	0.131615
6.31	0.180995	0.257234	0.0364532	0.0664963	-0.0134004	0.185358	0.151952		6.31	0.448555	0.446794	-0.0857638	0.0216311	-0.0289464	0.120888	0.138491
6.31333	0.185962	0.257665	0.0332736	0.0642283	-0.0167414	0.181924	0.15194		6.31333	0.445787	0.45458	-0.0814175	0.0197853	-0.0297592	0.124304	0.139346
6.31667	0.181102	0.25375	0.0383197	0.0656366	-0.019011	0.184431	0.154679		6.31667	0.442702	0.451469	-0.0886667	0.0212332	-0.02804	0.119246	0.134926
6.32	0.182732	0.25322	0.031159	0.0652069	-0.0139027	0.18246	0.156639		6.32	0.444582	0.454407	-0.0856578	0.0237691	-0.0286137	0.125862	0.137596
6.32333	0.185422	0.253515	0.0387797	0.0643097	-0.0152062	0.185266	0.158615		6.32333	0.448676	0.45453	-0.084448	0.016486	-0.0321143	0.126256	0.132124
6.32667	0.18416	0.258178	0.0362638	0.0641676	-0.0144855	0.18267	0.158686		6.32667	0.44634	0.448213	-0.0862406	0.0185059	-0.0255699	0.123109	0.134674
6.33	0.183988	0.255111	0.036133	0.0671096	-0.016737	0.187137	0.154204		6.33	0.441925	0.448374	-0.0857809	0.0227393	-0.0297642	0.121513	0.137158
6.33333	0.187709	0.257426	0.0346277	0.0620736	-0.0155321	0.189148	0.155826		6.33333	0.445458	0.454718	-0.0863688	0.0254901	-0.0258171	0.125977	0.13507
6.33667	0.182314	0.256208	0.0328867	0.061808	-0.0140019	0.179927	0.154636		6.33667	0.444154	0.449004	-0.0874675	0.0163412	-0.0259294	0.128292	0.14202
6.34	0.186161	0.256788	0.0364893	0.0636536	-0.0106849	0.186492	0.154644		6.34	0.44853	0.454949	-0.0831042	0.0241993	-0.0299434	0.124279	0.135406
6.34333	0.185256	0.258943	0.0391897	0.0641586	-0.0167846	0.183775	0.156106		6.34333	0.443993	0.448738	-0.0889882	0.0214949	-0.0311379	0.125625	0.13718
6.34667	0.184851	0.256102	0.038475	0.0654093	-0.0116385	0.189754	0.158215		6.34667	0.444265	0.451836	-0.086757	0.0186164	-0.0301932	0.127504	0.137338
6.35	0.185694	0.255821	0.0268262	0.0631954	-0.0147833	0.184478	0.154069		6.35	0.444738	0.44822	-0.0816867	0.0219479	-0.0305743	0.125887	0.138517
6.35333	0.18709	0.262956	0.0372054	0.0624317	-0.0146659	0.185864	0.156064		6.35333	0.445815	0.451446	-0.0912836	0.0228797	-0.0316372	0.124011	0.135045
6.35667	0.183175	0.258548	0.0378665	0.0662617	-0.0139864	0.181836	0.154852		6.35667	0.442159	0.449643	-0.0817292	0.0194259	-0.032439	0.125707	0.141077
6.36	0.184019	0.255848	0.0376077	0.0603719	-0.0187801	0.18761	0.151982		6.36	0.446271	0.447855	-0.0844584	0.0161382	-0.0259813	0.12603	0.135779
6.36333	0.184614	0.256483	0.0396195	0.0719597	-0.0186168	0.187891	0.15927		6.36333	0.444034	0.45542	-0.0863042	0.0204065	-0.0316697	0.123738	0.135048
6.36667	0.182458	0.255642	0.0350926	0.0632081	-0.015996	0.186527	0.154629		6.36667	0.4417	0.451086	-0.0892619	0.0161653	-0.0268195	0.12883	0.137344
6.37	0.18636	0.258386	0.0375071	0.061167	-0.0165202	0.183627	0.155297		6.37	0.443765	0.445821	-0.085574	0.0214826	-0.0292727	0.12463	0.136058
6.37333	0.182569	0.258526	0.0341807	0.0667013	-0.0171236	0.182049	0.157749		6.37333	0.445101	0.454453	-0.0870226	0.0217143	-0.0276615	0.123707	0.138775
6.37667	0.182491	0.258032	0.0364695	0.0621069	-0.0124394	0.180263	0.158947		6.37667	0.444409	0.448138	-0.0881062	0.019657	-0.0285944	0.127536	0.137227
6.38	0.184744	0.260581	0.037423	0.0706767	-0.0162991	0.182533	0.155455		6.38	0.441818	0.445003	-0.091019	0.0229626	-0.0295149	0.125906	0.140796
6.38333	0.182672	0.255432	0.038108	0.0646647	-0.0176202	0.188411	0.157199		6.38333	0.444303	0.458375	-0.0898652	0.0201073	-0.0283718	0.124901	0.138798
6.38667	0.179508	0.257364	0.0360908	0.0614562	-0.0164946	0.184674	0.157563		6.38667	0.443557	0.449015	-0.090538	0.0211483	-0.0270635	0.125006	0.137117
6.39	0.185538	0.258636	0.036964	0.0659868	-0.0194497	0.184137	0.156558		6.39	0.441466	0.450031	-0.0862558	0.0212887	-0.0315675	0.122769	0.138172
6.39333	0.184381	0.256729	0.0339789	0.0641079	-0.0155491	0.188012	0.155149		6.39333	0.445218	0.449455	-0.0857321	0.0211428	-0.0267942	0.127617	0.13806
6.39667	0.183321	0.256826	0.0363036	0.0599559	-0.0175097	0.187298	0.162167		6.39667	0.444308	0.446366	-0.0811731	0.0195064	-0.0287223	0.127519	0.14084
6.4	0.18474	0.258419	0.0359084	0.066634	-0.0161138	0.18397	0.157931		6.4	0.442537	0.444388	-0.0861826	0.0212741	-0.0261294	0.126104	0.140011
6.40333	0.183169	0.257871	0.0356902	0.061171	-0.0147962	0.183803	0.157704		6.40333	0.447661	0.450037	-0.0826671	0.023099	-0.0199112	0.123049	0.13656
6.40667	0.183556	0.256998	0.0339288	0.0671501	-0.0215837	0.186974	0.156887		6.40667	0.4423	0.447165	-0.0857525	0.0188409	-0.0243964	0.127579	0.137848
6.41	0.183079	0.256752	0.0370182	0.0645856	-0.0170327	0.18831	0.154301		6.41	0.44713	0.445867	-0.0896404	0.0212535	-0.025677	0.127454	0.139996
6.41333	0.180296	0.256275	0.034755	0.0681261	-0.0131145	0.186843	0.154672		6.41333	0.442764	0.452168	-0.0886227	0.018833	-0.0294141	0.126675	0.139636
6.41667	0.18384	0.263473	0.0363927	0.0625171	-0.0166804	0.187173	0.160267		6.41667	0.441199	0.45053	-0.0833141	0.0185887	-0.0289392	0.123135	0.138416
6.42	0.186074	0.252952	0.037374	0.0626504	-0.0162317	0.180554	0.1552		6.42	0.442578	0.447533	-0.0857722	0.0206654	-0.0282923	0.124968	0.139455
6.42333	0.184283	0.257192	0.0323401	0.0623498	-0.0174514	0.189587	0.15924		6.42333	0.443493	0.448517	-0.0880507	0.0143255	-0.030276	0.125226	0.13794
6.42667	0.184905	0.257521	0.0360175	0.0625368	-0.0170053	0.188033	0.15274		6.42667	0.441653	0.448328	-0.086794	0.0182644	-0.0237615	0.128129	0.135485
6.43	0.184227	0.252344	0.0333173	0.0640456	-0.0216199	0.188187	0.154687		6.43	0.444513	0.444444	-0.0826195	0.0226918	-0.0230284	0.128661	0.145936
6.43333	0.186033	0.257055	0.0375535	0.061849	-0.0121625	0.186097	0.156117		6.43333	0.443578	0.444989	-0.0839768	0.0211257	-0.0278572	0.122905	0.142931
6.43667	0.185846	0.259709	0.0317857	0.0648136	-0.0115747	0.189285	0.158315		6.43667	0.444293	0.448461	-0.0882387	0.0220454	-0.0267578	0.123985	0.137035
6.44	0.184498	0.255099	0.0366266	0.0635928	-0.0165131	0.179451	0.155491		6.44	0.440883	0.442456	-0.0888716	0.0167065	-0.0331869	0.125598	0.136252
6.44333	0.183087	0.257625	0.0364378	0.0613661	-0.0170226	0.191662	0.156183		6.44333	0.442764	0.450262	-0.088179	0.0207391	-0.0292201	0.127629	0.143043
6.44667	0.182362	0.258141	0.0371989	0.0681043	-0.0159968	0.189773	0.157948		6.44667	0.443469	0.44943	-0.092944	0.0206062	-0.027622	0.130038	0.135866
6.45	0.183666	0.256571	0.0361594	0.0686715	-0.013501	0.183616	0.157611		6.45	0.44706	0.448137	-0.0850303	0.0199601	-0.0318002	0.126259	0.137186
6.45333	0.183868	0.255684	0.0389106	0.0658151	-0.0182855	0.187483	0.157391		6.45333	0.443807	0.449254	-0.0865428	0.0200691	-0.0298557	0.126806	0.14136
6.45667	0.188513	0.254046	0.0349818	0.0636699	-0.0156777	0.186464	0.154281		6.45667	0.445787	0.453192	-0.0832806	0.0130466	-0.0289267	0.126582	0.135639
6.46	0.179641	0.258075	0.0354759	0.0634268	-0.0174769	0.186816	0.152846		6.46	0.438534	0.446305	-0.0915784	0.0231155	-0.0270133	0.123844	0.140287
6.46333	0.185478	0.254211	0.035214	0.0660676	-0.015624	0.186735	0.155524		6.46333	0.441458	0.445512	-0.0872938	0.0170731	-0.0255286	0.12551	0.137508
6.46667	0.182502	0.259717	0.0326138	0.0627469	-0.0165039	0.190388	0.154082		6.46667	0.441606	0.452633	-0.085115	0.027871	-0.0261271	0.126187	0.13518
6.47	0.183764	0.256053	0.0338631	0.0658414	-0.0205593	0.191252	0.158229		6.47	0.44349	0.450974	-0.0878015	0.0181905	-0.0287254	0.125162	0.142061
6.47333	0.183745	0.256624	0.03517	0.0607777	-0.017644	0.187217	0.154261		6.47333	0.442475	0.450087	-0.084393	0.0164438	-0.0289359	0.128026	0.138027
6.47667	0.179805	0.254852	0.0389228	0.0668301	-0.0154021	0.189352	0.154276		6.47667	0.448268	0.448395	-0.0861211	0.0190759	-0.0283734	0.129709	0.139488
6.48	0.185164	0.255162	0.0353965	0.0675223	-0.0178049	0.188093	0.156867		6.48	0.446542	0.4537	-0.0879055	0.018701	-0.0302266	0.126328	0.140215
6.48333	0.181592	0.258087	0.0335809	0.0620757	-0.0156537	0.19117	0.157661		6.48333	0.440835	0.447098	-0.0877143	0.0154961	-0.0303542	0.130261	0.139524
6.48667	0.183654	0.258088	0.0347953	0.0654175	-0.0166221	0.181761	0.151708		6.48667	0.444675	0.450232	-0.0924549	0.0228591	-0.0242433	0.131051	0.142812
6.49	0.183258	0.255732	0.0362237	0.0661561	-0.0136313	0.189283	0.154815		6.49	0.443222	0.444082	-0.0880104	0.0187776	-0.029308	0.1317	0.136468
6.49333	0.182392	0.259073	0.0327208	0.0625292	-0.0161179	0.186785	0.156636		6.49333	0.446332	0.448497	-0.0857002	0.0171309	-0.0248456	0.128673	0.142166
6.49667	0.182472	0.255222	0.0307296	0.0661901	-0.022771	0.188515	0.158338		6.49667	0.442439	0.450265	-0.0918104	0.0240839	-0.0321436	0.128491	0.137731
6.5	0.184738	0.256016	0.0374955	0.0643412	-0.0130578	0.18711	0.153217		6.5	0.444377	0.450386	-0.0878791	0.0168124	-0.0335248	0.125871	0.14247
6.50333	0.184673	0.259003	0.0376336	0.0606042	-0.0192541	0.18644	0.157355		6.50333	0.443534	0.445131	-0.0873585	0.0196985	-0.0304039	0.130437	0.143684
6.50667	0.182532	0.253086	0.0382141	0.0601039	-0.0196155	0.185798	0.157766		6.50667	0.440684	0.447619	-0.0856906	0.0146442	-0.026657	0.127098	0.138113
6.51	0.186084	0.25791	0.0358045	0.0636406	-0.0150245	0.18691	0.160828		6.51	0.435247	0.445004	-0.0843195	0.0174164	-0.0266155	0.122798	0.138294
6.51333	0.185315	0.253738	0.0337062	0.0616083	-0.0150738	0.186403	0.159143		6.51333	0.439523	0.451438	-0.0865229	0.0161709	-0.0223886	0.127128	0.140173
6.51667	0.181224	0.25952	0.0365394	0.062817	-0.0167009	0.186147	0.156712		6.51667	0.440338	0.445767	-0.0892086	0.0158603	-0.0278848	0.128996	0.1402
6.52	0.182932	0.254333	0.0328343	0.0689943	-0.0173853	0.189516	0.156662		6.52	0.441732	0.442	-0.0829721	0.0211548	-0.0274842	0.129761	0.136462
6.52333	0.183553	0.257175	0.0390609	0.063604	-0.0183894	0.187377	0.160408		6.52333	0.441493	0.442938	-0.0898047	0.0181316	-0.0263421	0.125785	0.139258
6.52667	0.184828	0.255446	0.0346214	0.0631146	-0.0108737	0.1905	0.161288		6.52667	0.441426	0.447806	-0.0877294	0.0170534	-0.0300903	0.131799	0.139784
6.53	0.184929	0.258159	0.0349448	0.0609556	-0.0138032	0.186554	0.162718		6.53	0.438979	0.449498	-0.0863616	0.0185022	-0.0293978	0.129379	0.139216
6.53333	0.181265	0.256364	0.0345874	0.0617723	-0.0183304	0.187151	0.160674		6.53333	0.440394	0.44778	-0.0855553	0.0211339	-0.0281663	0.130618	0.143748
6.53667	0.185021	0.258478	0.0366476	0.0671502	-0.0154878	0.185406	0.159247		6.53667	0.445369	0.447559	-0.0873749	0.0168631	-0.0290036	0.125959	0.141742
6.54	0.183924	0.254144	0.0384978	0.0628571	-0.0173113	0.183359	0.160949		6.54	0.441743	0.445144	-0.0872119	0.0176701	-0.0278854	0.128578	0.138853
6.54333	0.185208	0.2575	0.0374299	0.0607011	-0.0170998	0.187948	0.155132		6.54333	0.436958	0.445253	-0.0835819	0.016919	-0.0252843	0.125388	0.136392
6.54667	0.175988	0.255835	0.036946	0.0651117	-0.0147625	0.184704	0.163412		6.54667	0.44203	0.449352	-0.087442	0.0179715	-0.027401	0.126861	0.138537
6.55	0.186169	0.257632	0.0356556	0.0647628	-0.0143639	0.190665	0.159218		6.55	0.441611	0.446216	-0.0878161	0.0187923	-0.0274879	0.130565	0.135976
6.55333	0.181921	0.263166	0.0334195	0.0629281	-0.0139225	0.191131	0.159324		6.55333	0.446346	0.445764	-0.0908883	0.0193454	-0.03229	0.12776	0.14175
6.55667	0.180791	0.259172	0.0353304	0.0675048	-0.0207684	0.187763	0.160691		6.55667	0.442742	0.445328	-0.0865372	0.0192228	-0.0275865	0.129456	0.142339
6.56	0.180965	0.255892	0.0361958	0.0636288	-0.0181058	0.186633	0.158		6.56	0.437949	0.446932	-0.0891575	0.021979	-0.0263816	0.129687	0.141675
6.56333	0.18004	0.258348	0.0308371	0.063098	-0.0146143	0.184522	0.159796		6.56333	0.439598	0.446871	-0.0912183	0.0132727	-0.0277885	0.126934	0.141061
6.56667	0.182438	0.257542	0.0357737	0.0651084	-0.0172712	0.18895	0.161005		6.56667	0.442215	0.441778	-0.0902731	0.0187101	-0.0264068	0.129366	0.137894
6.57	0.183004	0.260664	0.0387834	0.0690567	-0.0147604	0.186051	0.152252		6.57	0.43812	0.447664	-0.0835838	0.0179365	-0.0300828	0.126536	0.140336
6.57333	0.180717	0.255371	0.0376551	0.0651053	-0.0191985	0.186517	0.161174		6.57333	0.443898	0.442906	-0.0870577	0.0206483	-0.0318543	0.127173	0.141012
6.57667	0.183984	0.25628	0.0336079	0.0640336	-0.0194398	0.186477	0.155548		6.57667	0.43807	0.446087	-0.0874234	0.0141793	-0.0279744	0.129972	0.141312
6.58	0.181185	0.260322	0.0361981	0.0667812	-0.0169912	0.184534	0.161457		6.58	0.439724	0.446762	-0.0901145	0.017434	-0.0340331	0.13	0.139277
6.58333	0.180658	0.252405	0.0390038	0.0625674	-0.0152811	0.188067	0.155265		6.58333	0.441863	0.447888	-0.0931784	0.0192827	-0.0257844	0.127371	0.142577
6.58667	0.180264	0.258893	0.0397429	0.0651129	-0.0186401	0.188384	0.159345		6.58667	0.438486	0.449901	-0.0893112	0.0139026	-0.0246454	0.125809	0.141861
6.59	0.185777	0.25842	0.0375988	0.0612623	-0.0177025	0.190049	0.15674		6.59	0.442512	0.444385	-0.0880975	0.0145149	-0.0258454	0.128321	0.139222
6.59333	0.178626	0.259873	0.0357052	0.0664458	-0.01779	0.192457	0.160859		6.59333	0.442025	0.442876	-0.0853009	0.0183445	-0.0281608	0.130684	0.142844
6.59667	0.182979	0.255959	0.0379128	0.0640052	-0.0195864	0.18976	0.155517		6.59667	0.441566	0.446399	-0.0910899	0.0152739	-0.0277425	0.126863	0.140804
6.6	0.183472	0.254395	0.0385496	0.0681174	-0.0188076	0.188136	0.156943		6.6	0.439765	0.44885	-0.0905028	0.0169491	-0.0265647	0.125893	0.141098
6.60333	0.180072	0.25382	0.0372259	0.0629207	-0.0196095	0.185544	0.160911		6.60333	0.444862	0.446198	-0.089918	0.0198957	-0.0281806	0.12722	0.140693
6.60667	0.184092	0.255661	0.0380023	0.0639885	-0.0158373	0.189221	0.15397		6.60667	0.437344	0.443961	-0.0893393	0.0173263	-0.0276198	0.128846	0.141489
6.61	0.179727	0.259302	0.0356265	0.0684886	-0.0176248	0.191526	0.162789		6.61	0.438833	0.444129	-0.0924061	0.0202159	-0.0268994	0.132249	0.142392
6.61333	0.186373	0.255043	0.0377147	0.0666667	-0.0191656	0.191264	0.156395		6.61333	0.442295	0.448485	-0.0883363	0.0227595	-0.0357888	0.130616	0.142285
6.61667	0.184717	0.256813	0.0337652	0.0672098	-0.0153847	0.187433	0.162297		6.61667	0.439917	0.438981	-0.0877905	0.0178864	-0.0295726	0.135152	0.13969
6.62	0.182263	0.255078	0.0339428	0.0674235	-0.0197832	0.189736	0.162816		6.62	0.438668	0.442496	-0.0974153	0.0169861	-0.027761	0.126446	0.138167
6.62333	0.18401	0.260271	0.0358969	0.0667896	-0.0182669	0.184882	0.163079		6.62333	0.443631	0.446407	-0.0923644	0.0158011	-0.032128	0.130035	0.138498
6.62667	0.186232	0.251229	0.0337464	0.0657254	-0.0162028	0.188861	0.163953		6.62667	0.437833	0.446013	-0.091426	0.0212202	-0.0265836	0.13159	0.139718
6.63	0.184568	0.258287	0.0319635	0.06319	-0.019881	0.187991	0.158593		6.63	0.437883	0.443751	-0.093492	0.0146428	-0.0294937	0.129413	0.137936
6.63333	0.18458	0.261485	0.0371698	0.0660865	-0.0187061	0.189198	0.160679		6.63333	0.44235	0.442244	-0.0900159	0.0187614	-0.0244656	0.127313	0.137113
6.63667	0.182091	0.25575	0.0350726	0.0606142	-0.0140178	0.191367	0.162061		6.63667	0.435017	0.443618	-0.0872801	0.0177904	-0.0260825	0.126109	0.138317
6.64	0.180815	0.254822	0.0313572	0.0624795	-0.0188029	0.187875	0.16119		6.64	0.442842	0.449246	-0.0917588	0.0173093	-0.027836	0.128661	0.143554
6.64333	0.179513	0.259382	0.0309101	0.064871	-0.0152509	0.187479	0.162146		6.64333	0.439692	0.443766	-0.0919169	0.0185179	-0.025972	0.127733	0.1418
6.64667	0.187515	0.255676	0.0331422	0.0602118	-0.0184246	0.192296	0.161917		6.64667	0.436189	0.44336	-0.088038	0.0149885	-0.0240935	0.129523	0.138337
6.65	0.183219	0.25912	0.0309247	0.0642249	-0.017841	0.194661	0.159757		6.65	0.435883	0.44354	-0.0930047	0.0204831	-0.0329583	0.127622	0.1429
6.65333	0.178769	0.251303	0.0384177	0.0624476	-0.0169447	0.19059	0.155395		6.65333	0.433647	0.439611	-0.0886372	0.0209704	-0.029301	0.130885	0.140334
6.65667	0.18591	0.260207	0.0350973	0.0650259	-0.0182935	0.19131	0.161948		6.65667	0.440216	0.449751	-0.0894973	0.0208829	-0.0285786	0.128287	0.141669
6.66	0.184801	0.260214	0.0357705	0.0637377	-0.0194453	0.188871	0.156258		6.66	0.44168	0.43794	-0.0922706	0.0193566	-0.0251836	0.129501	0.138757
[truncated: 7,301 more rows]
