# Supplementary material for: Early steps of protein disaggregation by Hsp70 chaperone and class B J-domain proteins are shaped by Hsp110
Source: eLife. 2024 Oct 15;13:RP94795. doi: 10.7554/eLife.94795 (PMC11479587; doi:10.7554/eLife.94795)
Supplement: Figure 1—figure supplement 1—source data 8. [file elife-94795-fig1-figsupp1-data8.xlsx]

## Sheet: Arkusz1
Time (min)	DNAJB4, Hsc70			DNAJB4, Hsc70, Hsp105						DNAJA2, Hsc70			DNAJA2, Hsc70, Hsp105
0	0.000226	0.000281	0.000195	0.00042	0.000438	0.000336			0	0.000167	0.000178	0.000185	0.000431	0.000389	0.000386
30	0.000778	0.000707	0.00068	0.022309	0.021482	0.018012			30	0.000257	0.000256	0.000228	0.00572	0.003774	0.006083
60	0.006746	0.005971	0.006708	0.182716	0.162896	0.159061			60	0.000311	0.000298	0.000424	0.038707	0.029812	0.030447
90	0.022208	0.016879	0.0193	0.519673	0.381245	0.402752			90	0.000444	0.000415	0.000437	0.073753	0.067589	0.059431
120	0.041264	0.03958	0.038281	0.970999	0.822772	0.825367			120	0.000282	0.000496	0.000511	0.132607	0.115176	0.112578
150	0.069353	0.061179	0.067208	1.68108	1.49744	1.68009			150	0.00052	0.000598	0.000506	0.163193	0.171333	0.152437
180	0.089049	0.083041	0.087523	2.37544	1.85784	2.29604			180	0.000426	0.000531	0.000513	0.238884	0.2534	0.226337
210	0.107397	0.106429	0.108807	2.9976	2.55112	2.60424			210	0.000522	0.000648	0.000567	0.304602	0.300554	0.291372
240	0.144674	0.140892	0.158106	3.98376	3.45443	3.57255			240	0.000459	0.000605	0.000619	0.340747	0.329676	0.356691
270	0.179406	0.17648	0.180087	4.32047	3.99921	3.96526			270	0.000493	0.000553	0.000614	0.420989	0.437142	0.414316
300	0.21005	0.21388	0.233921	4.86224	4.87502	4.81161			300	0.000468	0.000573	0.0006	0.436386	0.43436	0.471861
