# Supplementary material for: Early steps of protein disaggregation by Hsp70 chaperone and class B J-domain proteins are shaped by Hsp110
Source: eLife. 2024 Oct 15;13:RP94795. doi: 10.7554/eLife.94795 (PMC11479587; doi:10.7554/eLife.94795)
Supplement: Figure 1—figure supplement 1—source data 9. [file elife-94795-fig1-figsupp1-data9.xlsx]

## Sheet: Figure 1—figure supplement 1I
	Ssa1 EEVD, Sis1 E50A			Ssa1 EEVD, Sis1 E50A, Sse1
Time (min)	Mean	SD	N	Mean	SD	N
0	0.0001	0	3	0.0001	0	3
10	0.0023	0.0004	3	0.0004	0.0001	3
20	0.0149	0.0008	3	0.0012	0.0003	3
30	0.0386	0.0087	3	0.0023	0.0008	3
45	0.0743	0.0057	3	0.0041	0.0013	3
60	0.1289	0.0319	3	0.006	0.0025	3
75	0.1771	0.0252	3	0.0099	0.0065	3
90	0.2513	0.0497	3	0.01	0.0021	3
105	0.3187	0.0513	3	0.0128	0.002	3
120	0.3802	0.0565	3	0.0142	0.0034	3
135	0.4313	0.0704	3	0.0155	0.0039	3
150	0.4892	0.0815	3	0.0188	0.0066	3
165	0.5413	0.0613	3	0.0213	0.0055	0
180	0.5626	0.0615	3	0.0233	0.0046	3
