# Supplementary material for: Early steps of protein disaggregation by Hsp70 chaperone and class B J-domain proteins are shaped by Hsp110
Source: eLife. 2024 Oct 15;13:RP94795. doi: 10.7554/eLife.94795 (PMC11479587; doi:10.7554/eLife.94795)
Supplement: Figure 1—figure supplement 1—source data 10. [file elife-94795-fig1-figsupp1-data10.xlsx]

## Sheet: Figure 1—figure supplement 1J
1 replicate					2 replicate
Time (min)	Ssa1 EEVD, Sis1 E50A	Ssa1 EEVD, Sis1 E50A, Sse1			Time (min)	SisE50A, EEVD	SisE50A, EEVD, 0,1uM Sse
0	0	0			0	0	0
0.003333	0.002749	0.006765			0.00333333	0.00296591	0.000970467
0.006667	0.004077	0.000864			0.00666667	0.00311961	0.00076594
0.01	-0.0013	-0.00346			0.01	0.00315977	0.00268015
0.013333	-0.00475	0.000819			0.0133333	0.00401307	0.00342259
0.016667	-0.00245	-0.00346			0.0166667	0.00341504	0.00458
0.02	0.000763	-0.00451			0.02	0.00255285	0.00492045
0.023333	-0.0011	-0.00225			0.0233333	0.00299402	0.00580806
0.026667	-0.00469	-0.00125			0.0266667	0.00290981	0.00430199
0.03	-0.00243	-0.00873			0.03	0.00292558	0.00512044
0.033333	-0.00128	-0.00317			0.0333333	0.00308096	0.00533762
0.036667	0.000502	-0.00341			0.0366667	0.00396141	0.00608241
0.04	-0.00231	-0.0058			0.04	0.0036252	0.00580147
0.043333	-0.00176	-0.00399			0.0433333	0.00341419	0.00664181
0.046667	0.000609	-0.00136			0.0466667	0.00284002	0.00468753
0.05	-0.00498	-0.00021			0.05	0.00434859	0.00439604
0.053333	-0.00489	-0.00241			0.0533333	0.0033717	0.0041324
0.056667	-0.00151	-0.00277			0.0566667	0.00279861	0.00526376
0.06	0.002928	-0.00403			0.06	0.00237635	0.0061067
0.063333	-0.00145	-0.00528			0.0633333	0.00222068	0.00758981
0.066667	0.002895	-0.00561			0.0666667	-6.09214e-05	0.00835361
0.07	0.002843	-0.00272			0.07	-0.00114727	0.00669465
0.073333	-0.0022	-0.00502			0.0733333	-0.000500604	0.00515572
0.076667	-0.00083	-0.0064			0.0766667	-0.00104212	0.00509494
0.08	-0.00326	-0.00574			0.08	-0.00165514	0.00545833
0.083333	0.001204	-0.00489			0.0833333	-0.000511587	0.0034234
0.086667	0.000232	-0.00248			0.0866667	-0.000976212	0.00588317
0.09	-0.00265	-0.00688			0.09	-0.00103187	0.00641252
0.093333	-0.00495	-0.00631			0.0933333	-0.000361466	0.00546121
0.096667	0.000241	-0.00454			0.0966667	-0.000870969	0.00445599
0.1	0.001452	-0.00498			0.1	-0.00162612	0.00427646
0.103333	0.000514	-0.0028			0.103333	-0.000516611	0.00381571
0.106667	-0.00082	-0.0028			0.106667	-0.00211668	0.0014727
0.11	0.002195	-0.00453			0.11	-0.00200645	0.00109065
0.113333	0.000166	-0.00643			0.113333	-0.00173017	0.000868716
0.116667	-0.0005	-0.00143			0.116667	-0.00198937	0.0011616
0.12	-0.00329	-0.00484			0.12	-0.00180405	-0.000162612
0.123333	-0.00231	-0.00611			0.123333	-0.000141315	0.00213686
0.126667	-0.00096	-0.00381			0.126667	-0.00100396	0.003342
0.13	-0.00328	-0.00169			0.13	-0.000470676	0.00355185
0.133333	-0.00717	-0.00295			0.133333	-0.000541331	0.00433767
0.136667	0.000246	-0.0101			0.136667	-0.00184951	0.00404531
0.14	-0.00087	-0.01048			0.14	-0.00147631	0.00293958
0.143333	-0.00479	-0.00945			0.143333	-0.000750876	0.00185771
0.146667	-0.00451	-0.00559			0.146667	-0.00107649	0.00271429
0.15	-0.00058	-0.00748			0.15	-0.000932042	0.000749403
0.153333	-0.00268	-0.00015			0.153333	-0.000587538	0.000320315
0.156667	-0.00073	-0.00409			0.156667	-0.00334898	0.00140306
0.16	-0.00064	-0.00793			0.16	-0.00346448	0.000433149
0.163333	-0.00097	-0.00625			0.163333	-0.00437611	-0.000296018
0.166667	-0.00357	-0.00955			0.166667	-0.00453874	0.00118997
0.17	-0.00581	-0.00982			0.17	-0.00496092	0.000632221
0.173333	-0.00974	-0.00474			0.173333	-0.00451341	0.000112536
0.176667	-0.00237	-0.0045			0.176667	-0.00457871	0.00100677
0.18	0.002329	-0.00851			0.18	-0.00379511	0.000568313
0.183333	-0.00112	-0.00773			0.183333	-0.00403176	0.000344068
0.186667	0.001607	-0.00855			0.186667	-0.00217488	0.000213388
0.19	-0.00318	-0.0076			0.19	-0.00109752	-0.00109311
0.193333	0.001069	-0.00834			0.193333	-0.00117436	-0.000760642
0.196667	-0.00268	-0.00561			0.196667	-0.003541	-0.00028848
0.2	-0.00218	-0.0101			0.2	-0.00455871	-0.000229111
0.203333	-0.00537	-0.01048			0.203333	-0.00768006	0.00106422
0.206667	-0.00367	-0.01266			0.206667	-0.00867071	0.00323585
0.21	-0.00333	-0.00808			0.21	-0.00968401	0.00211941
0.213333	-3.7e-05	-0.00728			0.213333	-0.00883606	0.0013377
0.216667	-0.00489	-0.00558			0.216667	-0.00772731	0.00147843
0.22	-0.00285	-0.01119			0.22	-0.00829944	0.00222642
0.223333	-0.00116	-0.00714			0.223333	-0.00939299	0.000694873
0.226667	-0.00667	-0.00994			0.226667	-0.0101023	0.00283397
0.23	-0.00234	-0.01057			0.23	-0.0104239	0.00408991
0.233333	-0.007	-0.0073			0.233333	-0.0112411	0.00468581
0.236667	-0.0051	-0.00738			0.236667	-0.00998123	0.00314093
0.24	-0.00391	-0.00841			0.24	-0.00825892	0.00372386
0.243333	-0.00119	-0.00744			0.243333	-0.00760821	0.00113067
0.246667	-0.00306	-0.00986			0.246667	-0.0076068	0.000523151
0.25	-0.00411	-0.01168			0.25	-0.00787053	-0.000903488
0.253333	-0.00656	-0.01038			0.253333	-0.00684105	0.00141943
0.256667	-0.00195	-0.01062			0.256667	-0.00820328	0.000197567
0.26	-0.00285	-0.01121			0.26	-0.0102226	0.00132746
0.263333	-0.00265	-0.00531			0.263333	-0.0102195	0.00097102
0.266667	0.001997	-0.00581			0.266667	-0.0101453	0.00147667
0.27	-0.00527	-0.00817			0.27	-0.0119096	-0.00149033
0.273333	-0.00466	-0.01059			0.273333	-0.0125594	0.000261517
0.276667	-0.00313	-0.01008			0.276667	-0.00987046	-5.63078e-06
0.28	-0.00392	-0.00835			0.28	-0.0112509	0.000642243
0.283333	-0.00109	-0.01102			0.283333	-0.0121784	0.00120999
0.286667	-0.00335	-0.01332			0.286667	-0.01172	0.0035372
0.29	-0.00189	-0.0076			0.29	-0.0113799	0.00315904
0.293333	-0.00291	-0.01172			0.293333	-0.0125232	0.00535172
0.296667	-0.00472	-0.00889			0.296667	-0.0104425	0.00395829
0.3	-0.00186	-0.01074			0.3	-0.0109082	0.00507471
0.303333	-0.00416	-0.0121			0.303333	-0.0117125	0.00350788
0.306667	-0.00183	-0.01513			0.306667	-0.0101219	0.00460367
0.31	0.000366	-0.01253			0.31	-0.0103061	0.0026224
0.313333	-0.00579	-0.01196			0.313333	-0.0119582	0.00208921
0.316667	-0.00461	-0.01201			0.316667	-0.0108624	0.00170644
0.32	-0.00423	-0.00944			0.32	-0.00977147	0.00333668
0.323333	-0.00799	-0.00952			0.323333	-0.0106375	0.00150697
0.326667	-0.00426	-0.01136			0.326667	-0.0108117	0.00161859
0.33	-0.00299	-0.0116			0.33	-0.0108974	0.00290804
0.333333	-0.00741	-0.01307			0.333333	-0.0112246	0.00115856
0.336667	-0.00843	-0.0158			0.336667	-0.0118254	0.00133296
0.34	-0.00164	-0.01307			0.34	-0.0130032	0.00364044
0.343333	-0.00713	-0.01397			0.343333	-0.013376	0.00374993
0.346667	-0.00866	-0.01412			0.346667	-0.0125086	0.00448557
0.35	-0.00264	-0.01302			0.35	-0.0125164	0.00481331
0.353333	0.001331	-0.01214			0.353333	-0.013436	0.00355542
0.356667	-0.00643	-0.01693			0.356667	-0.0134215	0.00139976
0.36	-0.00197	-0.01513			0.36	-0.0136769	0.000405372
0.363333	-0.00368	-0.01629			0.363333	-0.0143715	-0.00137011
0.366667	-0.0059	-0.01321			0.366667	-0.0130843	-0.000151942
0.37	-0.01015	-0.01165			0.37	-0.0131365	0.00235905
0.373333	-0.00652	-0.01516			0.373333	-0.0134524	0.00246804
0.376667	-0.00229	-0.01181			0.376667	-0.0109301	0.00378343
0.38	-0.00373	-0.0176			0.38	-0.0113523	0.00550989
0.383333	-0.00019	-0.01211			0.383333	-0.0127948	0.00382361
0.386667	-0.00373	-0.01474			0.386667	-0.011989	0.00186959
0.39	-0.00845	-0.01448			0.39	-0.0108805	0.00268489
0.393333	-0.00234	-0.01235			0.393333	-0.0134819	0.002285
0.396667	-0.0019	-0.0166			0.396667	-0.0120517	0.00258934
0.4	-0.00425	-0.01434			0.4	-0.0121316	0.0037754
0.403333	-0.00765	-0.01251			0.403333	-0.0103125	0.00366716
0.406667	-0.00393	-0.01658			0.406667	-0.011404	0.00155595
0.41	-0.00977	-0.01467			0.41	-0.00985848	0.00237162
0.413333	-0.00383	-0.01339			0.413333	-0.00951662	0.000984336
0.416667	-0.00672	-0.01499			0.416667	-0.00955317	0.0016627
0.42	-0.00888	-0.01605			0.42	-0.0112151	0.00177321
0.423333	-0.00401	-0.0161			0.423333	-0.0101695	0.00379333
0.426667	-0.00608	-0.01476			0.426667	-0.0114572	0.00173126
0.43	-0.00694	-0.01439			0.43	-0.0127687	0.00230468
0.433333	-0.00581	-0.01445			0.433333	-0.0115188	-0.000463874
0.436667	-0.00534	-0.0143			0.436667	-0.00988805	-0.000785081
0.44	-0.00452	-0.01716			0.44	-0.0127466	-0.000416268
0.443333	-0.0075	-0.01819			0.443333	-0.0129981	0.00148245
0.446667	-0.00969	-0.01586			0.446667	-0.0119058	0.00112226
0.45	-0.00613	-0.01472			0.45	-0.0125729	0.00267242
0.453333	-0.00955	-0.01636			0.453333	-0.0138065	0.00397043
0.456667	-0.00761	-0.01266			0.456667	-0.0123063	0.00253531
0.46	-0.00435	-0.01634			0.46	-0.0117961	0.0022494
0.463333	-0.00894	-0.01748			0.463333	-0.0119768	0.00165518
0.466667	-0.00536	-0.01657			0.466667	-0.013377	0.00169153
0.47	-0.00862	-0.01277			0.47	-0.0136595	-0.0010939
0.473333	-0.00615	-0.01758			0.473333	-0.0137109	-0.00117506
0.476667	-0.00514	-0.01718			0.476667	-0.0132102	-7.92278e-05
0.48	-0.01336	-0.01852			0.48	-0.013976	0.000851253
0.483333	-0.00877	-0.01598			0.483333	-0.0128089	0.00045104
0.486667	-0.00988	-0.02298			0.486667	-0.0120179	0.00215866
0.49	-0.00458	-0.01616			0.49	-0.0103877	0.00257415
0.493333	-0.00868	-0.0165			0.493333	-0.0105591	-2.04469e-05
0.496667	-0.00644	-0.01736			0.496667	-0.0101217	-0.000709479
0.5	-0.06613	-0.07519			0.5	0.144563	0.163523
0.503333	-0.07618	-0.08024			0.503333	0.145931	0.150432
0.506667	-0.07179	-0.08092			0.506667	0.160389	0.156935
0.51	-0.07663	-0.08474			0.51	0.158928	0.152166
0.513333	-0.07056	-0.07973			0.513333	0.159593	0.152199
0.516667	-0.07204	-0.08155			0.516667	0.16212	0.14727
0.52	-0.07209	-0.08173			0.52	0.163627	0.147879
0.523333	-0.07006	-0.07897			0.523333	0.162842	0.143334
0.526667	-0.07259	-0.08219			0.526667	0.163282	0.143832
0.53	-0.07247	-0.07644			0.53	0.164277	0.14371
0.533333	-0.06681	-0.07903			0.533333	0.16479	0.145721
0.536667	-0.068	-0.07599			0.536667	0.164266	0.143075
0.54	-0.067	-0.07852			0.54	0.164576	0.146414
0.543333	-0.0665	-0.07363			0.543333	0.163267	0.146166
0.546667	-0.06801	-0.07694			0.546667	0.164033	0.147484
0.55	-0.06817	-0.07256			0.55	0.164761	0.148068
0.553333	-0.06947	-0.06974			0.553333	0.166634	0.151492
0.556667	-0.06274	-0.06948			0.556667	0.166344	0.153112
0.56	-0.06171	-0.06992			0.56	0.17107	0.15546
0.563333	-0.06485	-0.06871			0.563333	0.171172	0.155824
0.566667	-0.06189	-0.0674			0.566667	0.170885	0.15923
0.57	-0.06413	-0.06407			0.57	0.174009	0.163002
0.573333	-0.05999	-0.06319			0.573333	0.177516	0.165976
0.576667	-0.05906	-0.05794			0.576667	0.17798	0.167629
0.58	-0.05724	-0.05482			0.58	0.181908	0.171419
0.583333	-0.05421	-0.06087			0.583333	0.186531	0.173701
0.586667	-0.05594	-0.05764			0.586667	0.189626	0.175982
0.59	-0.05588	-0.05619			0.59	0.192095	0.178636
0.593333	-0.05361	-0.05429			0.593333	0.193785	0.183056
0.596667	-0.0519	-0.05157			0.596667	0.195991	0.186141
0.6	-0.0458	-0.04852			0.6	0.199983	0.189722
0.603333	-0.04828	-0.04975			0.603333	0.201171	0.195488
0.606667	-0.04483	-0.0445			0.606667	0.202777	0.199727
0.61	-0.04372	-0.04191			0.61	0.207103	0.204356
0.613333	-0.04407	-0.0374			0.613333	0.210825	0.210466
0.616667	-0.04243	-0.03882			0.616667	0.213072	0.217678
0.62	-0.04186	-0.03782			0.62	0.217669	0.221451
0.623333	-0.03899	-0.03191			0.623333	0.223055	0.227794
0.626667	-0.03812	-0.03375			0.626667	0.226604	0.232623
0.63	-0.04104	-0.03108			0.63	0.229801	0.236602
0.633333	-0.03346	-0.0275			0.633333	0.236281	0.24063
0.636667	-0.03417	-0.02676			0.636667	0.240854	0.247
0.64	-0.03664	-0.02418			0.64	0.244976	0.251033
0.643333	-0.02955	-0.02308			0.643333	0.249607	0.256843
0.646667	-0.03044	-0.01895			0.646667	0.25526	0.262775
0.65	-0.02278	-0.01242			0.65	0.25736	0.269876
0.653333	-0.02391	-0.0103			0.653333	0.263471	0.27595
0.656667	-0.02102	-0.0117			0.656667	0.267502	0.281173
0.66	-0.02199	-0.0034			0.66	0.273911	0.286578
0.663333	-0.01968	-0.00438			0.663333	0.278973	0.29224
0.666667	-0.0157	-0.00385			0.666667	0.286332	0.295669
0.67	-0.01455	-0.00024			0.67	0.291046	0.301893
0.673333	-0.01415	0.002173			0.673333	0.298381	0.306535
0.676667	-0.01143	0.007574			0.676667	0.300674	0.312407
0.68	-0.0059	0.006458			0.68	0.305612	0.319572
0.683333	-0.00693	0.014259			0.683333	0.311247	0.326764
0.686667	-0.00138	0.015316			0.686667	0.317325	0.332492
0.69	0.000156	0.016196			0.69	0.320522	0.339848
0.693333	0.003544	0.017723			0.693333	0.327949	0.347457
0.696667	0.001842	0.02324			0.696667	0.333642	0.353464
0.7	0.008007	0.026974			0.7	0.339392	0.360569
0.703333	0.01247	0.033712			0.703333	0.345718	0.367669
0.706667	0.011682	0.030527			0.706667	0.353488	0.376406
0.71	0.010353	0.032372			0.71	0.360593	0.381574
0.713333	0.015965	0.039334			0.713333	0.36786	0.387938
0.716667	0.019086	0.041934			0.716667	0.373574	0.392984
0.72	0.017295	0.042069			0.72	0.381311	0.399309
0.723333	0.030369	0.052023			0.723333	0.386068	0.402925
0.726667	0.027412	0.050264			0.726667	0.391471	0.408642
0.73	0.031211	0.055446			0.73	0.397864	0.413514
0.733333	0.035482	0.057635			0.733333	0.40214	0.418959
0.736667	0.037469	0.059548			0.736667	0.407573	0.428693
0.74	0.037514	0.06431			0.74	0.415102	0.437653
0.743333	0.043929	0.064189			0.743333	0.422404	0.442728
0.746667	0.043904	0.072374			0.746667	0.427365	0.450911
0.75	0.042525	0.069352			0.75	0.435511	0.459222
0.753333	0.050427	0.077697			0.753333	0.443465	0.466182
0.756667	0.050226	0.082123			0.756667	0.450706	0.471412
0.76	0.053906	0.08677			0.76	0.455734	0.480226
0.763333	0.056934	0.088894			0.763333	0.462276	0.487528
0.766667	0.05711	0.093586			0.766667	0.467351	0.495263
0.77	0.065995	0.093888			0.77	0.475528	0.502497
0.773333	0.063027	0.098382			0.773333	0.480444	0.508155
0.776667	0.071827	0.103437			0.776667	0.488128	0.517787
0.78	0.068885	0.107757			0.78	0.49571	0.524394
0.783333	0.07299	0.106873			0.783333	0.504049	0.530464
0.786667	0.080217	0.114977			0.786667	0.511263	0.536532
0.79	0.084255	0.112726			0.79	0.520252	0.544323
0.793333	0.083038	0.120953			0.793333	0.527172	0.550312
0.796667	0.085542	0.121537			0.796667	0.534804	0.558436
0.8	0.092108	0.125058			0.8	0.541968	0.566206
0.803333	0.092188	0.12848			0.803333	0.549777	0.575
0.806667	0.097515	0.134079			0.806667	0.555345	0.585228
0.81	0.101388	0.136256			0.81	0.562665	0.591433
0.813333	0.100718	0.139231			0.813333	0.56877	0.59801
0.816667	0.104862	0.143461			0.816667	0.575648	0.603866
0.82	0.105501	0.147966			0.82	0.58322	0.609337
0.823333	0.111835	0.148796			0.823333	0.590944	0.6127
0.826667	0.114444	0.155827			0.826667	0.597903	0.619686
0.83	0.115476	0.155009			0.83	0.604486	0.626239
0.833333	0.119412	0.163159			0.833333	0.612358	0.632962
0.836667	0.123371	0.169469			0.836667	0.621294	0.640618
0.84	0.127734	0.174301			0.84	0.628615	0.648796
0.843333	0.13265	0.177871			0.843333	0.63546	0.655165
0.846667	0.135182	0.17918			0.846667	0.645144	0.661507
0.85	0.141565	0.182448			0.85	0.651987	0.670297
0.853333	0.138842	0.183694			0.853333	0.658225	0.67994
0.856667	0.143453	0.190884			0.856667	0.665446	0.689181
0.86	0.148812	0.196726			0.86	0.675297	0.697912
0.863333	0.1547	0.199189			0.863333	0.680943	0.70697
0.866667	0.155406	0.202526			0.866667	0.688906	0.714466
0.87	0.155312	0.209663			0.87	0.695995	0.721709
0.873333	0.165036	0.211103			0.873333	0.70532	0.72813
0.876667	0.167525	0.216245			0.876667	0.712129	0.734125
0.88	0.17465	0.218446			0.88	0.720443	0.739706
0.883333	0.173639	0.224837			0.883333	0.7285	0.743281
0.886667	0.175126	0.22948			0.886667	0.736191	0.752507
0.89	0.184159	0.23442			0.89	0.743611	0.759898
0.893333	0.187347	0.234098			0.893333	0.751589	0.767612
0.896667	0.18691	0.243214			0.896667	0.760046	0.776395
0.9	0.188714	0.241279			0.9	0.768316	0.786633
0.903333	0.194357	0.249576			0.903333	0.779425	0.793252
0.906667	0.199787	0.256658			0.906667	0.787821	0.799346
0.91	0.207473	0.259566			0.91	0.795276	0.806669
0.913333	0.201687	0.263417			0.913333	0.803778	0.813038
0.916667	0.213293	0.26833			0.916667	0.8113	0.821255
0.92	0.217191	0.27153			0.92	0.819401	0.829966
0.923333	0.216869	0.271143			0.923333	0.825857	0.837199
0.926667	0.224678	0.281841			0.926667	0.833345	0.845304
0.93	0.226826	0.28497			0.93	0.839721	0.852133
0.933333	0.232371	0.285672			0.933333	0.846936	0.85692
0.936667	0.233165	0.291102			0.936667	0.855746	0.864018
0.94	0.239781	0.296219			0.94	0.864966	0.872758
0.943333	0.243456	0.297554			0.943333	0.872913	0.878885
0.946667	0.249891	0.302934			0.946667	0.880638	0.884992
0.95	0.24965	0.308481			0.95	0.889213	0.89357
0.953333	0.250298	0.316367			0.953333	0.89656	0.902301
0.956667	0.258901	0.319654			0.956667	0.902003	0.9074
0.96	0.263885	0.318746			0.96	0.908725	0.91465
0.963333	0.268274	0.323084			0.963333	0.91421	0.921912
0.966667	0.267891	0.328889			0.966667	0.919899	0.929772
0.97	0.275116	0.333111			0.97	0.929832	0.934778
0.973333	0.278105	0.338587			0.973333	0.93853	0.942786
0.976667	0.280448	0.34582			0.976667	0.944706	0.950148
0.98	0.285011	0.348062			0.98	0.954136	0.957159
0.983333	0.28977	0.352157			0.983333	0.961358	0.963502
0.986667	0.294172	0.356504			0.986667	0.969611	0.972006
0.99	0.299193	0.360221			0.99	0.978385	0.978289
0.993333	0.307648	0.365765			0.993333	0.989419	0.983328
0.996667	0.305113	0.368466			0.996667	0.995362	0.990533
1	0.310063	0.377211			1	1.00433	0.996128
1.00333	0.312741	0.380676			1.00333	1.01316	1.0049
1.00667	0.32059	0.382986			1.00667	1.02065	1.01203
1.01	0.323466	0.387329			1.01	1.02616	1.01925
1.01333	0.325493	0.395161			1.01333	1.03489	1.02519
1.01667	0.332199	0.393957			1.01667	1.04122	1.03166
1.02	0.338637	0.402261			1.02	1.0486	1.03714
1.02333	0.341462	0.402799			1.02333	1.05576	1.04205
1.02667	0.346008	0.412452			1.02667	1.06467	1.04925
1.03	0.346568	0.41595			1.03	1.07403	1.05583
1.03333	0.357061	0.418302			1.03333	1.08426	1.06295
1.03667	0.35789	0.425117			1.03667	1.09285	1.06917
1.04	0.362278	0.430584			1.04	1.10002	1.07799
1.04333	0.364798	0.433118			1.04333	1.10712	1.08392
1.04667	0.369712	0.440207			1.04667	1.11493	1.09047
1.05	0.371173	0.441908			1.05	1.12067	1.09715
1.05333	0.379147	0.449535			1.05333	1.12685	1.10602
1.05667	0.381969	0.448967			1.05667	1.1348	1.11149
1.06	0.385337	0.456413			1.06	1.14213	1.11764
1.06333	0.396243	0.45863			1.06333	1.14915	1.12491
1.06667	0.401923	0.468948			1.06667	1.15836	1.12884
1.07	0.399455	0.471339			1.07	1.16765	1.13324
1.07333	0.402886	0.469828			1.07333	1.17637	1.1399
1.07667	0.409911	0.477649			1.07667	1.18585	1.14724
1.08	0.416582	0.482438			1.08	1.19507	1.15436
1.08333	0.417626	0.485729			1.08333	1.20418	1.16403
1.08667	0.423935	0.490571			1.08667	1.21192	1.17199
1.09	0.426464	0.5015			1.09	1.21865	1.17954
1.09333	0.430708	0.503323			1.09333	1.22688	1.18526
1.09667	0.438606	0.509396			1.09667	1.23225	1.19042
1.1	0.4419	0.514631			1.1	1.23839	1.1947
1.10333	0.444168	0.51786			1.10333	1.24799	1.2015
1.10667	0.451741	0.517999			1.10667	1.25682	1.20677
1.11	0.45371	0.523477			1.11	1.26382	1.21347
1.11333	0.461335	0.533336			1.11333	1.27177	1.22058
1.11667	0.461507	0.533111			1.11667	1.28106	1.22892
1.12	0.470216	0.542134			1.12	1.28667	1.23543
1.12333	0.474897	0.546663			1.12333	1.29612	1.24249
1.12667	0.479241	0.54771			1.12667	1.30404	1.24909
1.13	0.483552	0.556629			1.13	1.3113	1.2558
1.13333	0.4862	0.561974			1.13333	1.31858	1.26137
1.13667	0.493552	0.564291			1.13667	1.33045	1.26765
1.14	0.495421	0.568579			1.14	1.33872	1.27277
1.14333	0.505632	0.572567			1.14333	1.34845	1.28003
1.14667	0.503341	0.576531			1.14667	1.35866	1.28508
1.15	0.509217	0.581579			1.15	1.3652	1.29081
1.15333	0.51391	0.586958			1.15333	1.37081	1.29889
1.15667	0.522054	0.592568			1.15667	1.37788	1.30522
1.16	0.525507	0.598211			1.16	1.38274	1.30997
1.16333	0.526655	0.606036			1.16333	1.38918	1.31713
1.16667	0.532684	0.602729			1.16667	1.39618	1.3239
1.17	0.536041	0.610877			1.17	1.40556	1.32904
1.17333	0.545406	0.615287			1.17333	1.41201	1.3346
1.17667	0.547449	0.622495			1.17667	1.42157	1.3412
1.18	0.557491	0.626413			1.18	1.43045	1.34651
1.18333	0.55989	0.63178			1.18333	1.44048	1.35144
1.18667	0.562124	0.637299			1.18667	1.4474	1.3581
1.19	0.566565	0.636692			1.19	1.45501	1.36327
1.19333	0.576287	0.640013			1.19333	1.46194	1.36838
1.19667	0.57805	0.650331			1.19667	1.46926	1.37435
1.2	0.580337	0.651569			1.2	1.47569	1.3816
1.20333	0.58722	0.65688			1.20333	1.48361	1.38813
1.20667	0.595256	0.662581			1.20667	1.4896	1.39574
1.21	0.592871	0.669619			1.21	1.4949	1.40153
1.21333	0.602237	0.670001			1.21333	1.50103	1.40776
1.21667	0.607969	0.674372			1.21667	1.5077	1.41308
1.22	0.611568	0.680085			1.22	1.51595	1.41899
1.22333	0.616964	0.685893			1.22333	1.52649	1.42694
1.22667	0.620774	0.690201			1.22667	1.53759	1.4337
1.23	0.627576	0.700728			1.23	1.54575	1.4387
1.23333	0.633715	0.703488			1.23333	1.55442	1.44467
1.23667	0.631087	0.71119			1.23667	1.56361	1.45046
1.24	0.647144	0.711889			1.24	1.57115	1.45368
1.24333	0.644362	0.712951			1.24333	1.5773	1.45876
1.24667	0.650925	0.72245			1.24667	1.58516	1.46498
1.25	0.654459	0.726341			1.25	1.59156	1.47017
1.25333	0.659643	0.730371			1.25333	1.59724	1.47724
1.25667	0.659553	0.735136			1.25667	1.60611	1.48266
1.26	0.669924	0.736549			1.26	1.61326	1.4885
1.26333	0.672133	0.742258			1.26333	1.61968	1.49396
1.26667	0.681437	0.74807			1.26667	1.62766	1.49968
1.27	0.684093	0.752694			1.27	1.63575	1.50519
1.27333	0.692869	0.757756			1.27333	1.64022	1.51279
1.27667	0.690615	0.76557			1.27667	1.6467	1.51753
1.28	0.698729	0.766761			1.28	1.65599	1.52247
1.28333	0.708481	0.770668			1.28333	1.66093	1.52783
1.28667	0.707924	0.780111			1.28667	1.66733	1.53351
1.29	0.714252	0.782232			1.29	1.67835	1.53847
1.29333	0.717525	0.785351			1.29333	1.68602	1.54409
1.29667	0.720015	0.791927			1.29667	1.69007	1.54849
1.3	0.729392	0.796844			1.3	1.70055	1.55349
1.30333	0.731682	0.798997			1.30333	1.70595	1.557
1.30667	0.740712	0.802286			1.30667	1.71365	1.5618
1.31	0.741299	0.809853			1.31	1.72056	1.56711
1.31333	0.751379	0.811887			1.31333	1.72877	1.57363
1.31667	0.753618	0.822486			1.31667	1.73379	1.57923
1.32	0.757954	0.824459			1.32	1.74285	1.58741
1.32333	0.765874	0.825838			1.32333	1.7488	1.59307
1.32667	0.764137	0.836561			1.32667	1.75679	1.59861
1.33	0.77234	0.83816			1.33	1.76566	1.60289
1.33333	0.779759	0.839578			1.33333	1.77251	1.60967
1.33667	0.782626	0.849103			1.33667	1.78018	1.61431
1.34	0.788831	0.853555			1.34	1.78737	1.62055
1.34333	0.79619	0.856272			1.34333	1.79331	1.62721
1.34667	0.800926	0.86152			1.34667	1.79883	1.63451
1.35	0.800503	0.8644			1.35	1.80643	1.63878
1.35333	0.807315	0.872321			1.35333	1.81245	1.64363
1.35667	0.810749	0.874289			1.35667	1.82021	1.65039
1.36	0.818029	0.8808			1.36	1.82699	1.65207
1.36333	0.824892	0.885841			1.36333	1.83357	1.65532
1.36667	0.825684	0.889465			1.36667	1.83928	1.65976
1.37	0.836061	0.898021			1.37	1.84582	1.66678
1.37333	0.837251	0.898109			1.37333	1.85223	1.66873
1.37667	0.84736	0.905614			1.37667	1.85755	1.67251
1.38	0.849274	0.907846			1.38	1.8643	1.67771
1.38333	0.856907	0.91783			1.38333	1.87102	1.68091
1.38667	0.860446	0.919447			1.38667	1.8783	1.6831
1.39	0.863453	0.920844			1.39	1.88302	1.69001
1.39333	0.868115	0.925095			1.39333	1.89086	1.69878
1.39667	0.877186	0.93219			1.39667	1.89691	1.70357
1.4	0.877501	0.93678			1.4	1.90452	1.71106
1.40333	0.878974	0.939771			1.40333	1.9104	1.71802
1.40667	0.892087	0.948743			1.40667	1.91913	1.72193
1.41	0.895788	0.95177			1.41	1.92408	1.72437
1.41333	0.900497	0.95546			1.41333	1.92953	1.72777
1.41667	0.906541	0.957882			1.41667	1.93474	1.72947
1.42	0.912344	0.964041			1.42	1.94128	1.73364
1.42333	0.909819	0.96699			1.42333	1.94657	1.74014
1.42667	0.922363	0.978547			1.42667	1.95235	1.74767
1.43	0.923464	0.977728			1.43	1.95909	1.75389
1.43333	0.929672	0.98615			1.43333	1.96678	1.76047
1.43667	0.932046	0.985134			1.43667	1.97087	1.76481
1.44	0.938362	0.991747			1.44	1.97865	1.77037
1.44333	0.943321	0.993511			1.44333	1.98607	1.77377
1.44667	0.949389	1.00011			1.44667	1.99358	1.77855
1.45	0.953281	1.00532			1.45	1.997	1.78477
1.45333	0.962441	1.00804			1.45333	2.00485	1.79003
1.45667	0.96153	1.01544			1.45667	2.01186	1.7929
1.46	0.971209	1.01875			1.46	2.01655	1.7977
1.46333	0.975248	1.02062			1.46333	2.02191	1.80218
1.46667	0.983087	1.02757			1.46667	2.03125	1.80387
1.47	0.98691	1.03001			1.47	2.03776	1.8083
1.47333	0.988727	1.03579			1.47333	2.04273	1.81744
1.47667	0.999185	1.03721			1.47667	2.05198	1.82289
1.48	0.999789	1.04541			1.48	2.05877	1.83005
1.48333	1.00505	1.0542			1.48333	2.06357	1.83696
1.48667	1.01271	1.05414			1.48667	2.06911	1.84219
1.49	1.01539	1.06163			1.49	2.07773	1.84192
1.49333	1.01986	1.06376			1.49333	2.08272	1.84525
1.49667	1.02395	1.06735			1.49667	2.08851	1.84868
1.5	1.02784	1.07209			1.5	2.09492	1.85194
1.50333	1.03512	1.07714			1.50333	2.10131	1.85382
1.50667	1.04044	1.08135			1.50667	2.10748	1.86068
1.51	1.04642	1.08381			1.51	2.11357	1.86626
1.51333	1.04818	1.09351			1.51333	2.12095	1.87072
1.51667	1.05363	1.09452			1.51667	2.12742	1.8748
1.52	1.06007	1.10163			1.52	2.13309	1.88133
1.52333	1.06342	1.10207			1.52333	2.1411	1.88663
1.52667	1.0694	1.10542			1.52667	2.14605	1.8871
1.53	1.07421	1.11039			1.53	2.15001	1.88859
1.53333	1.08152	1.11728			1.53333	2.15421	1.89343
1.53667	1.08851	1.12055			1.53667	2.15897	1.89506
1.54	1.08846	1.12513			1.54	2.16705	1.89824
1.54333	1.09543	1.13186			1.54333	2.17354	1.90627
1.54667	1.09955	1.132			1.54667	2.18077	1.915
1.55	1.10186	1.13636			1.55	2.18738	1.91969
1.55333	1.10771	1.14259			1.55333	2.19459	1.92665
1.55667	1.11391	1.1434			1.55667	2.19947	1.92927
1.56	1.11593	1.15137			1.56	2.20584	1.93206
1.56333	1.1205	1.1588			1.56333	2.21175	1.93108
1.56667	1.1276	1.15786			1.56667	2.21644	1.93353
1.57	1.13382	1.16268			1.57	2.22321	1.93512
1.57333	1.14028	1.16935			1.57333	2.22816	1.93944
1.57667	1.14579	1.17479			1.57667	2.23338	1.94207
1.58	1.1537	1.17361			1.58	2.23873	1.94886
1.58333	1.15286	1.182			1.58333	2.24495	1.95294
1.58667	1.15799	1.18463			1.58667	2.24895	1.95826
1.59	1.16315	1.18933			1.59	2.25554	1.96542
1.59333	1.16693	1.19199			1.59333	2.26177	1.96843
1.59667	1.17615	1.19914			1.59667	2.26612	1.97206
1.6	1.17857	1.20726			1.6	2.2706	1.97757
1.60333	1.1813	1.20592			1.60333	2.27652	1.98209
1.60667	1.18603	1.20821			1.60667	2.28218	1.98267
1.61	1.19011	1.21554			1.61	2.28614	1.98577
1.61333	1.19934	1.21831			1.61333	2.29023	1.98876
1.61667	1.20093	1.22707			1.61667	2.29676	1.99124
1.62	1.21007	1.22731			1.62	2.30075	1.99458
1.62333	1.21315	1.23324			1.62333	2.30477	2.00245
1.62667	1.21283	1.23829			1.62667	2.30956	2.00901
1.63	1.22181	1.24129			1.63	2.31547	2.01181
1.63333	1.23023	1.24164			1.63333	2.31975	2.01676
1.63667	1.23402	1.25071			1.63667	2.32612	2.02026
1.64	1.23404	1.24972			1.64	2.33294	2.02377
1.64333	1.23936	1.25943			1.64333	2.33937	2.02746
1.64667	1.2468	1.26119			1.64667	2.34461	2.03358
1.65	1.25176	1.26382			1.65	2.35098	2.0348
1.65333	1.25051	1.26441			1.65333	2.35535	2.03577
1.65667	1.26377	1.27486			1.65667	2.35797	2.03899
1.66	1.2661	1.27845			1.66	2.3591	2.04419
1.66333	1.2693	1.2797			1.66333	2.36181	2.04536
1.66667	1.27225	1.28343			1.66667	2.36562	2.04991
1.67	1.28153	1.28913			1.67	2.37119	2.05606
1.67333	1.28807	1.29407			1.67333	2.37734	2.05792
1.67667	1.28887	1.29976			1.67667	2.38481	2.05933
1.68	1.29338	1.30178			1.68	2.39355	2.06485
1.68333	1.30117	1.30555			1.68333	2.39984	2.07019
1.68667	1.30366	1.31267			1.68667	2.40549	2.07129
1.69	1.3065	1.31236			1.69	2.41306	2.07548
1.69333	1.31357	1.3195			1.69333	2.41851	2.0798
1.69667	1.31463	1.32713			1.69667	2.42231	2.08113
1.7	1.32371	1.32481			1.7	2.42655	2.08206
1.70333	1.32415	1.32692			1.70333	2.42962	2.0873
1.70667	1.33307	1.33411			1.70667	2.43152	2.09203
1.71	1.33773	1.33849			1.71	2.43616	2.09414
1.71333	1.34137	1.34489			1.71333	2.43944	2.09923
1.71667	1.34641	1.34225			1.71667	2.44285	2.10115
1.72	1.35319	1.355			1.72	2.44795	2.10313
1.72333	1.35228	1.34981			1.72333	2.4535	2.10816
1.72667	1.35941	1.35477			1.72667	2.45948	2.11261
1.73	1.36276	1.36437			1.73	2.4641	2.11402
1.73333	1.36588	1.36674			1.73333	2.46872	2.1166
1.73667	1.3742	1.36845			1.73667	2.47403	2.11965
1.74	1.37755	1.37389			1.74	2.47892	2.11914
1.74333	1.38509	1.37694			1.74333	2.47834	2.12206
1.74667	1.38606	1.3772			1.74667	2.48275	2.12522
1.75	1.39035	1.38431			1.75	2.48677	2.12944
1.75333	1.3959	1.39114			1.75333	2.48871	2.13336
1.75667	1.39908	1.39561			1.75667	2.49427	2.13659
1.76	1.40414	1.39169			1.76	2.49997	2.13901
1.76333	1.40836	1.39793			1.76333	2.50331	2.14141
1.76667	1.41553	1.40265			1.76667	2.50638	2.14737
1.77	1.41988	1.40542			1.77	2.51194	2.15175
1.77333	1.423	1.40758			1.77333	2.51593	2.15636
1.77667	1.42804	1.4121			1.77667	2.5214	2.15811
1.78	1.42937	1.42368			1.78	2.52943	2.16314
1.78333	1.43802	1.42866			1.78333	2.53565	2.16263
1.78667	1.44101	1.42769			1.78667	2.54	2.1651
1.79	1.45255	1.42978			1.79	2.54381	2.16716
1.79333	1.45154	1.43484			1.79333	2.5496	2.16922
1.79667	1.45343	1.43621			1.79667	2.5525	2.16882
1.8	1.46148	1.43912			1.8	2.55729	2.17267
1.80333	1.46741	1.45178			1.80333	2.56257	2.1767
1.80667	1.47593	1.44916			1.80667	2.56929	2.18189
1.81	1.47212	1.45232			1.81	2.57351	2.18526
1.81333	1.47722	1.45968			1.81333	2.57685	2.18872
1.81667	1.48357	1.46115			1.81667	2.57995	2.19463
1.82	1.48652	1.46362			1.82	2.58224	2.19418
1.82333	1.49607	1.46399			1.82333	2.58312	2.19831
1.82667	1.49751	1.47047			1.82667	2.58512	2.20417
1.83	1.5008	1.47368			1.83	2.58814	2.21037
1.83333	1.50634	1.47928			1.83333	2.59062	2.21005
1.83667	1.50796	1.48298			1.83667	2.59289	2.21461
1.84	1.5153	1.48686			1.84	2.60014	2.21397
1.84333	1.52079	1.48848			1.84333	2.60285	2.2149
1.84667	1.52106	1.49686			1.84667	2.60771	2.21684
1.85	1.52884	1.49965			1.85	2.61253	2.21931
1.85333	1.52996	1.49818			1.85333	2.61982	2.22119
1.85667	1.53545	1.50268			1.85667	2.62264	2.22317
1.86	1.54184	1.51191			1.86	2.62719	2.22619
1.86333	1.54349	1.51077			1.86333	2.6305	2.22731
1.86667	1.54948	1.51466			1.86667	2.63516	2.2304
1.87	1.54946	1.52098			1.87	2.63734	2.23286
1.87333	1.55777	1.52031			1.87333	2.64199	2.23675
1.87667	1.56618	1.52166			1.87667	2.64801	2.23789
1.88	1.56683	1.52652			1.88	2.65202	2.23987
1.88333	1.56936	1.52911			1.88333	2.65519	2.24084
1.88667	1.57421	1.5392			1.88667	2.65922	2.24293
1.89	1.57774	1.53547			1.89	2.66139	2.24634
1.89333	1.58441	1.53946			1.89333	2.66424	2.24952
1.89667	1.58549	1.54493			1.89667	2.6669	2.25435
1.9	1.59031	1.55177			1.9	2.66992	2.25738
1.90333	1.59673	1.55637			1.90333	2.67281	2.26132
1.90667	1.60216	1.55272			1.90667	2.67957	2.26604
1.91	1.60605	1.55943			1.91	2.68065	2.26839
1.91333	1.61268	1.56415			1.91333	2.6841	2.27027
1.91667	1.61586	1.56441			1.91667	2.68864	2.27345
1.92	1.62058	1.57353			1.92	2.69231	2.27475
1.92333	1.61827	1.56837			1.92333	2.69668	2.27831
1.92667	1.62207	1.57492			1.92667	2.70325	2.28288
1.93	1.63	1.58234			1.93	2.70699	2.28105
1.93333	1.63307	1.58051			1.93333	2.71159	2.28225
1.93667	1.6382	1.5846			1.93667	2.71557	2.28748
1.94	1.64217	1.59261			1.94	2.71786	2.28621
1.94333	1.6466	1.59342			1.94333	2.71985	2.28711
1.94667	1.65264	1.59605			1.94667	2.72368	2.2929
1.95	1.65468	1.59853			1.95	2.72641	2.29928
1.95333	1.65823	1.60154			1.95333	2.73128	2.29904
1.95667	1.6583	1.60652			1.95667	2.7348	2.30387
1.96	1.6702	1.60848			1.96	2.74076	2.30666
1.96333	1.67159	1.61297			1.96333	2.74535	2.31116
1.96667	1.6767	1.61837			1.96667	2.74857	2.31115
1.97	1.679	1.62173			1.97	2.74996	2.31541
1.97333	1.68413	1.61975			1.97333	2.75126	2.3156
1.97667	1.68782	1.62568			1.97667	2.75349	2.31781
1.98	1.69718	1.62826			1.98	2.7564	2.31912
1.98333	1.69576	1.62975			1.98333	2.75871	2.32032
1.98667	1.70146	1.63237			1.98667	2.75985	2.32079
1.99	1.70173	1.63815			1.99	2.7656	2.3246
1.99333	1.70416	1.64128			1.99333	2.77093	2.3259
1.99667	1.7122	1.64316			1.99667	2.77435	2.32681
2	1.7137	1.64841			2	2.77843	2.32889
2.00333	1.72109	1.65177			2.00333	2.78519	2.33207
2.00667	1.7224	1.65416			2.00667	2.78816	2.33583
2.01	1.72396	1.66009			2.01	2.7906	2.33599
2.01333	1.7308	1.6575			2.01333	2.79225	2.33828
2.01667	1.733	1.66022			2.01667	2.79333	2.34471
2.02	1.74098	1.66388			2.02	2.79376	2.34719
2.02333	1.73967	1.67142			2.02333	2.79464	2.34818
2.02667	1.74642	1.67491			2.02667	2.79806	2.35429
2.03	1.75451	1.67382			2.03	2.80194	2.35475
2.03333	1.75809	1.67862			2.03333	2.80609	2.35381
2.03667	1.76022	1.67942			2.03667	2.8101	2.35443
2.04	1.75784	1.68295			2.04	2.81277	2.35692
2.04333	1.77006	1.68407			2.04333	2.81438	2.35752
2.04667	1.77078	1.68982			2.04667	2.81652	2.3623
2.05	1.77389	1.69531			2.05	2.81814	2.36308
2.05333	1.77654	1.69243			2.05333	2.82124	2.36674
2.05667	1.78083	1.69801			2.05667	2.82575	2.36791
2.06	1.78772	1.70096			2.06	2.82873	2.36981
2.06333	1.78853	1.70285			2.06333	2.83156	2.36911
2.06667	1.79227	1.70572			2.06667	2.83347	2.37097
2.07	1.79692	1.70865			2.07	2.83524	2.3717
2.07333	1.80196	1.71378			2.07333	2.83755	2.37489
2.07667	1.80382	1.72022			2.07667	2.84304	2.37678
2.08	1.80661	1.71525			2.08	2.84741	2.37907
2.08333	1.80984	1.71953			2.08333	2.85345	2.38294
2.08667	1.81313	1.72943			2.08667	2.85648	2.38269
2.09	1.82209	1.72872			2.09	2.85844	2.38271
2.09333	1.82009	1.72909			2.09333	2.85862	2.38577
2.09667	1.82532	1.7349			2.09667	2.85861	2.39095
2.1	1.82778	1.73412			2.1	2.85908	2.39405
2.10333	1.83432	1.74209			2.10333	2.86188	2.39929
2.10667	1.83606	1.73702			2.10667	2.86444	2.40075
2.11	1.83838	1.74843			2.11	2.86848	2.4029
2.11333	1.84281	1.74522			2.11333	2.87197	2.40244
2.11667	1.84624	1.75236			2.11667	2.87488	2.40217
2.12	1.85329	1.75443			2.12	2.87749	2.40199
2.12333	1.85793	1.75419			2.12333	2.88004	2.40531
2.12667	1.8576	1.75825			2.12667	2.88079	2.40573
2.13	1.8645	1.76248			2.13	2.88267	2.40933
2.13333	1.86493	1.76237			2.13333	2.88558	2.41131
2.13667	1.86769	1.76757			2.13667	2.88932	2.41459
2.14	1.87114	1.77131			2.14	2.89417	2.41957
2.14333	1.87202	1.77111			2.14333	2.89766	2.42304
2.14667	1.87877	1.77796			2.14667	2.90065	2.42121
2.15	1.88434	1.78036			2.15	2.90222	2.41954
2.15333	1.89008	1.77727			2.15333	2.90258	2.42016
2.15667	1.88587	1.78123			2.15667	2.90293	2.42214
2.16	1.89559	1.78893			2.16	2.90534	2.42131
2.16333	1.89852	1.78683			2.16333	2.90831	2.42541
2.16667	1.90221	1.78955			2.16667	2.91172	2.42946
2.17	1.90581	1.79075			2.17	2.91672	2.43208
2.17333	1.91297	1.79459			2.17333	2.92064	2.43091
2.17667	1.91102	1.79685			2.17667	2.92341	2.43378
2.18	1.91184	1.79653			2.18	2.92548	2.43458
2.18333	1.92074	1.80365			2.18333	2.92733	2.43679
2.18667	1.92089	1.8081			2.18667	2.92856	2.43709
2.19	1.92421	1.80694			2.19	2.93033	2.43911
2.19333	1.9243	1.81115			2.19333	2.93215	2.44205
2.19667	1.93198	1.81377			2.19667	2.93532	2.44315
2.2	1.93921	1.81698			2.2	2.93872	2.44785
2.20333	1.93935	1.81956			2.20333	2.94256	2.45165
2.20667	1.94186	1.82733			2.20667	2.94506	2.45436
2.21	1.94303	1.82995			2.21	2.94841	2.45769
2.21333	1.94735	1.82927			2.21333	2.94897	2.46235
2.21667	1.94951	1.82546			2.21667	2.95068	2.46307
2.22	1.95738	1.83428			2.22	2.95123	2.46399
2.22333	1.9616	1.83623			2.22333	2.95207	2.46519
2.22667	1.9601	1.84002			2.22667	2.95351	2.46254
2.23	1.96298	1.83893			2.23	2.95562	2.46179
2.23333	1.96728	1.8436			2.23333	2.9573	2.46034
2.23667	1.97116	1.84525			2.23667	2.95711	2.45978
2.24	1.97493	1.84833			2.24	2.96027	2.46027
2.24333	1.97873	1.85025			2.24333	2.96327	2.4652
2.24667	1.9744	1.85358			2.24667	2.96576	2.46511
2.25	1.98074	1.85442			2.25	2.96901	2.46814
2.25333	1.98738	1.85565			2.25333	2.9743	2.47132
2.25667	1.98994	1.8597			2.25667	2.97611	2.47287
2.26	1.99552	1.85901			2.26	2.97642	2.47403
2.26333	1.99761	1.86562			2.26333	2.97762	2.47764
2.26667	1.99797	1.86625			2.26667	2.97776	2.48018
2.27	1.99996	1.86786			2.27	2.97772	2.48312
2.27333	2.00417	1.87445			2.27333	2.97896	2.48602
2.27667	2.00884	1.87586			2.27667	2.98506	2.48807
2.28	2.01039	1.87755			2.28	2.98738	2.48954
2.28333	2.01632	1.87587			2.28333	2.991	2.49084
2.28667	2.02119	1.88883			2.28667	2.99233	2.48884
2.29	2.02367	1.87874			2.29	2.9953	2.48863
2.29333	2.02529	1.88599			2.29333	2.99533	2.48893
2.29667	2.03087	1.88965			2.29667	2.99745	2.49183
2.3	2.02917	1.89188			2.3	3.00042	2.49397
2.30333	2.03183	1.89142			2.30333	3.00515	2.49799
2.30667	2.03653	1.89223			2.30667	3.00728	2.49953
2.31	2.04147	1.89633			2.31	3.00924	2.50055
2.31333	2.04007	1.89751			2.31333	3.01239	2.5
2.31667	2.04618	1.90301			2.31667	3.0139	2.49918
2.32	2.04978	1.90711			2.32	3.01429	2.49957
2.32333	2.048	1.90974			2.32333	3.01596	2.50237
2.32667	2.05368	1.91141			2.32667	3.01737	2.50622
2.33	2.06103	1.91365			2.33	3.0177	2.51033
2.33333	2.06247	1.91341			2.33333	3.01711	2.51399
2.33667	2.06369	1.91276			2.33667	3.02038	2.51716
2.34	2.06821	1.91473			2.34	3.02272	2.51587
2.34333	2.07152	1.91579			2.34333	3.0263	2.51747
2.34667	2.07521	1.92407			2.34667	3.02868	2.51601
2.35	2.07606	1.92158			2.35	3.03018	2.51406
2.35333	2.08166	1.92992			2.35333	3.03105	2.51457
2.35667	2.08271	1.92888			2.35667	3.03103	2.51848
2.36	2.08015	1.92886			2.36	3.03318	2.51791
2.36333	2.09237	1.93579			2.36333	3.03571	2.5199
2.36667	2.0912	1.93521			2.36667	3.04036	2.52377
2.37	2.09634	1.93547			2.37	3.0421	2.52466
2.37333	2.09448	1.94055			2.37333	3.04357	2.52489
2.37667	2.10223	1.94047			2.37667	3.04527	2.52735
2.38	2.10342	1.94861			2.38	3.04658	2.52759
2.38333	2.10342	1.94728			2.38333	3.04865	2.52643
2.38667	2.1091	1.94657			2.38667	3.05064	2.5284
2.39	2.11018	1.94645			2.39	3.05383	2.53162
2.39333	2.11341	1.95335			2.39333	3.05347	2.53104
2.39667	2.11589	1.95389			2.39667	3.05418	2.53451
2.4	2.12082	1.95836			2.4	3.05401	2.5377
2.40333	2.12152	1.96408			2.40333	3.05402	2.53724
2.40667	2.1244	1.95994			2.40667	3.05433	2.5358
2.41	2.13018	1.96526			2.41	3.05947	2.53808
2.41333	2.12821	1.96698			2.41333	3.06523	2.53674
2.41667	2.13197	1.97109			2.41667	3.06784	2.53768
2.42	2.13527	1.97042			2.42	3.07142	2.53993
2.42333	2.13476	1.9706			2.42333	3.07616	2.5426
2.42667	2.13989	1.97006			2.42667	3.07583	2.54486
2.43	2.1456	1.96977			2.43	3.07286	2.5484
2.43333	2.14901	1.9785			2.43333	3.07322	2.54724
2.43667	2.15093	1.97972			2.43667	3.0734	2.54702
2.44	2.15088	1.98292			2.44	3.07345	2.54705
2.44333	2.15599	1.98142			2.44333	3.07597	2.54515
2.44667	2.15757	1.98282			2.44667	3.08065	2.54528
2.45	2.1608	1.98578			2.45	3.08213	2.54869
2.45333	2.1601	1.98759			2.45333	3.0823	2.55075
2.45667	2.16019	1.98698			2.45667	3.08372	2.55405
2.46	2.1679	1.99223			2.46	3.08765	2.55646
2.46333	2.16963	1.99272			2.46333	3.08846	2.55863
2.46667	2.17423	1.99351			2.46667	3.09107	2.56094
2.47	2.17513	2.00224			2.47	3.09518	2.56327
2.47333	2.17593	2.0013			2.47333	3.09618	2.56363
2.47667	2.18092	2.00222			2.47667	3.09369	2.56615
2.48	2.18147	2.00015			2.48	3.09486	2.56555
2.48333	2.18706	2.00239			2.48333	3.09746	2.56475
2.48667	2.19121	2.00497			2.48667	3.0983	2.56348
2.49	2.18809	2.00862			2.49	3.10011	2.56274
2.49333	2.19081	2.01042			2.49333	3.10147	2.56343
2.49667	2.19224	2.01291			2.49667	3.10266	2.56462
2.5	2.1963	2.01925			2.5	3.10201	2.56573
2.50333	2.20681	2.01813			2.50333	3.104	2.57092
2.50667	2.20111	2.0233			2.50667	3.10451	2.57352
2.51	2.20447	2.02014			2.51	3.10472	2.57415
2.51333	2.21037	2.02345			2.51333	3.10404	2.57604
2.51667	2.21393	2.02206			2.51667	3.10526	2.57786
2.52	2.20699	2.02405			2.52	3.10645	2.57503
2.52333	2.21621	2.02841			2.52333	3.10838	2.57477
2.52667	2.21433	2.02713			2.52667	3.10996	2.5751
2.53	2.2178	2.03217			2.53	3.11319	2.57448
2.53333	2.21731	2.03333			2.53333	3.11427	2.57499
2.53667	2.22702	2.03307			2.53667	3.11419	2.57871
2.54	2.22822	2.03794			2.54	3.11546	2.58151
2.54333	2.22849	2.0363			2.54333	3.12103	2.58412
2.54667	2.23239	2.04099			2.54667	3.12429	2.58623
2.55	2.2345	2.04146			2.55	3.12657	2.58757
2.55333	2.2355	2.04299			2.55333	3.12891	2.58586
2.55667	2.24209	2.04891			2.55667	3.12906	2.58705
2.56	2.24648	2.04389			2.56	3.12997	2.58924
2.56333	2.24095	2.04918			2.56333	3.12951	2.59167
2.56667	2.24972	2.04597			2.56667	3.1305	2.59464
2.57	2.2464	2.04992			2.57	3.13276	2.59883
2.57333	2.24796	2.05635			2.57333	3.13602	2.59938
2.57667	2.25606	2.05755			2.57667	3.13686	2.60109
2.58	2.25475	2.05768			2.58	3.13711	2.60249
2.58333	2.2582	2.05665			2.58333	3.13787	2.6042
2.58667	2.26028	2.06008			2.58667	3.13628	2.60435
2.59	2.26189	2.06419			2.59	3.13499	2.60784
2.59333	2.2628	2.06376			2.59333	3.13574	2.60702
2.59667	2.26644	2.06338			2.59667	3.13742	2.60496
2.6	2.26737	2.06826			2.6	3.13986	2.6035
2.60333	2.26821	2.06712			2.60333	3.14241	2.60137
2.60667	2.27673	2.07437			2.60667	3.14645	2.59861
2.61	2.27212	2.07327			2.61	3.14844	2.60012
2.61333	2.27497	2.07648			2.61333	3.15001	2.60161
2.61667	2.27639	2.07115			2.61667	3.15005	2.60269
2.62	2.28126	2.07775			2.62	3.15151	2.60537
2.62333	2.282	2.07818			2.62333	3.15049	2.60861
2.62667	2.2849	2.0758			2.62667	3.15087	2.60941
2.63	2.288	2.08169			2.63	3.15234	2.61013
2.63333	2.28963	2.07931			2.63333	3.15488	2.6097
2.63667	2.29022	2.08255			2.63667	3.15615	2.60886
2.64	2.29392	2.08424			2.64	3.15885	2.60812
2.64333	2.29721	2.08597			2.64333	3.15902	2.60887
2.64667	2.29732	2.09019			2.64667	3.15823	2.61201
2.65	2.30283	2.0931			2.65	3.15715	2.61441
2.65333	2.30367	2.09449			2.65333	3.15788	2.61791
2.65667	2.30698	2.09483			2.65667	3.15861	2.62067
2.66	2.30457	2.09563			2.66	3.16172	2.62055
2.66333	2.30575	2.09666			2.66333	3.16649	2.62115
2.66667	2.31253	2.10015			2.66667	3.17003	2.623
2.67	2.31357	2.10043			2.67	3.1723	2.62198
2.67333	2.31594	2.10155			2.67333	3.17454	2.62073
2.67667	2.3189	2.10396			2.67667	3.17351	2.62235
2.68	2.31794	2.10598			2.68	3.17276	2.62275
2.68333	2.32366	2.10645			2.68333	3.17213	2.6239
2.68667	2.32107	2.10687			2.68667	3.17284	2.62724
2.69	2.32452	2.10631			2.69	3.17222	2.62819
2.69333	2.33164	2.10808			2.69333	3.17546	2.62911
2.69667	2.32576	2.11246			2.69667	3.17507	2.63003
2.7	2.32873	2.11221			2.7	3.17574	2.62747
2.70333	2.33478	2.11301			2.70333	3.17477	2.6273
2.70667	2.33333	2.11974			2.70667	3.17751	2.62777
2.71	2.34015	2.11612			2.71	3.17933	2.63085
2.71333	2.3419	2.12197			2.71333	3.18278	2.63159
2.71667	2.33908	2.11971			2.71667	3.18463	2.63432
2.72	2.34681	2.1182			2.72	3.18676	2.63684
2.72333	2.34357	2.12151			2.72333	3.18819	2.63983
2.72667	2.34576	2.12541			2.72667	3.18722	2.64019
2.73	2.35278	2.1296			2.73	3.18604	2.64193
2.73333	2.35046	2.12563			2.73333	3.18749	2.64311
2.73667	2.35709	2.12906			2.73667	3.19029	2.64185
2.74	2.35756	2.13364			2.74	3.18887	2.6396
2.74333	2.35272	2.12752			2.74333	3.19074	2.64063
2.74667	2.35885	2.13343			2.74667	3.19041	2.64163
2.75	2.36421	2.13187			2.75	3.18979	2.64242
2.75333	2.36466	2.14071			2.75333	3.18913	2.64274
2.75667	2.36264	2.13933			2.75667	3.1921	2.64457
2.76	2.36628	2.13868			2.76	3.19378	2.64118
2.76333	2.3633	2.13776			2.76333	3.19815	2.64088
2.76667	2.36852	2.13647			2.76667	3.20235	2.6412
2.77	2.36865	2.14029			2.77	3.20494	2.64288
2.77333	2.37642	2.14372			2.77333	3.20548	2.64324
2.77667	2.37477	2.14348			2.77667	3.20656	2.64897
2.78	2.37632	2.14459			2.78	3.20663	2.65155
2.78333	2.38047	2.14962			2.78333	3.20694	2.6526
2.78667	2.37707	2.15023			2.78667	3.20747	2.65302
2.79	2.38172	2.15128			2.79	3.20836	2.65383
2.79333	2.38981	2.14901			2.79333	3.20885	2.6521
2.79667	2.38526	2.15239			2.79667	3.2107	2.65009
2.8	2.39013	2.15122			2.8	3.20949	2.64974
2.80333	2.38717	2.15259			2.80333	3.21049	2.6531
2.80667	2.38976	2.15871			2.80667	3.21107	2.65419
2.81	2.3932	2.16078			2.81	3.21158	2.65547
2.81333	2.3951	2.15591			2.81333	3.21094	2.65711
2.81667	2.39479	2.15747			2.81667	3.2134	2.6597
2.82	2.39986	2.16229			2.82	3.21522	2.65627
2.82333	2.39612	2.16394			2.82333	3.21527	2.65933
2.82667	2.40145	2.16431			2.82667	3.21635	2.65851
2.83	2.39995	2.16358			2.83	3.21736	2.66074
2.83333	2.40443	2.16771			2.83333	3.21865	2.66128
2.83667	2.40274	2.16969			2.83667	3.21916	2.66292
2.84	2.4097	2.16829			2.84	3.21918	2.66147
2.84333	2.41232	2.16986			2.84333	3.22062	2.66107
2.84667	2.41256	2.16988			2.84667	3.22233	2.66033
2.85	2.41142	2.16792			2.85	3.22116	2.6599
2.85333	2.41178	2.17517			2.85333	3.21878	2.66079
2.85667	2.41952	2.17646			2.85667	3.22088	2.6632
2.86	2.42181	2.17758			2.86	3.21854	2.66551
2.86333	2.41854	2.17783			2.86333	3.22074	2.66766
2.86667	2.42181	2.17623			2.86667	3.22151	2.66696
2.87	2.42713	2.17935			2.87	3.22336	2.66563
2.87333	2.42346	2.18246			2.87333	3.2226	2.66365
2.87667	2.42325	2.18324			2.87667	3.22566	2.66283
2.88	2.42903	2.18188			2.88	3.22361	2.66167
2.88333	2.42919	2.18069			2.88333	3.22596	2.66262
2.88667	2.43026	2.18488			2.88667	3.22462	2.66635
2.89	2.43603	2.18882			2.89	3.22657	2.67004
2.89333	2.43744	2.18943			2.89333	3.22634	2.67333
2.89667	2.43464	2.18757			2.89667	3.23143	2.67352
2.9	2.43584	2.18854			2.9	3.22917	2.67716
2.90333	2.44004	2.18959			2.90333	3.232	2.67801
2.90667	2.43835	2.19046			2.90667	3.23254	2.6768
2.91	2.44144	2.19272			2.91	3.23513	2.6781
2.91333	2.44628	2.19557			2.91333	3.233	2.68003
2.91667	2.44959	2.19233			2.91667	3.23556	2.67869
2.92	2.44845	2.19931			2.92	3.23595	2.67848
2.92333	2.44987	2.19791			2.92333	3.23822	2.67911
2.92667	2.45121	2.19806			2.92667	3.23847	2.67783
2.93	2.45086	2.19862			2.93	3.23915	2.67983
2.93333	2.45601	2.19983			2.93333	3.23937	2.68088
2.93667	2.45749	2.19727			2.93667	3.24082	2.6819
2.94	2.45208	2.20127			2.94	3.23972	2.68237
2.94333	2.45704	2.20546			2.94333	3.24041	2.68429
2.94667	2.46346	2.20421			2.94667	3.23996	2.68552
2.95	2.46161	2.20697			2.95	3.24152	2.68765
2.95333	2.46105	2.20744			2.95333	3.24111	2.68792
2.95667	2.46401	2.21099			2.95667	3.24382	2.68748
2.96	2.46472	2.20769			2.96	3.244	2.68862
2.96333	2.4655	2.21164			2.96333	3.24745	2.6858
2.96667	2.47004	2.21002			2.96667	3.24721	2.68645
2.97	2.46824	2.21059			2.97	3.24907	2.68827
2.97333	2.46951	2.21157			2.97333	3.24943	2.68933
2.97667	2.47544	2.21612			2.97667	3.24906	2.6889
2.98	2.47542	2.21009			2.98	3.24918	2.68878
2.98333	2.47514	2.21521			2.98333	3.2499	2.68582
2.98667	2.47864	2.21712			2.98667	3.25006	2.68559
2.99	2.47758	2.21776			2.99	3.24927	2.68629
2.99333	2.4803	2.22114			2.99333	3.25157	2.68575
2.99667	2.47867	2.22395			2.99667	3.25162	2.68799
3	2.4815	2.22541			3	3.25218	2.68792
3.00333	2.48102	2.22122			3.00333	3.2541	2.6879
3.00667	2.48498	2.22261			3.00667	3.25645	2.68822
3.01	2.48344	2.22462			3.01	3.25618	2.68932
3.01333	2.49043	2.22251			3.01333	3.25564	2.6906
3.01667	2.49168	2.22466			3.01667	3.25818	2.69494
3.02	2.49226	2.22795			3.02	3.25931	2.69723
3.02333	2.49441	2.22383			3.02333	3.25937	2.70101
3.02667	2.49103	2.2287			3.02667	3.26021	2.70219
3.03	2.49507	2.22949			3.03	3.26244	2.70249
3.03333	2.4939	2.23173			3.03333	3.26183	2.70228
3.03667	2.49718	2.2298			3.03667	3.26235	2.69958
3.04	2.49769	2.23308			3.04	3.26296	2.69638
3.04333	2.5034	2.23245			3.04333	3.26433	2.69512
3.04667	2.50562	2.23544			3.04667	3.26333	2.6954
3.05	2.49961	2.23491			3.05	3.2642	2.69568
3.05333	2.49883	2.23653			3.05333	3.26483	2.69527
3.05667	2.50685	2.23454			3.05667	3.2654	2.69843
3.06	2.50984	2.24391			3.06	3.26576	2.70154
3.06333	2.50895	2.24271			3.06333	3.26744	2.70302
3.06667	2.50815	2.24343			3.06667	3.26897	2.70318
3.07	2.50716	2.24032			3.07	3.26957	2.70682
3.07333	2.51343	2.2434			3.07333	3.27064	2.70479
3.07667	2.51132	2.24511			3.07667	3.27243	2.70411
3.08	2.51521	2.24493			3.08	3.274	2.70174
3.08333	2.51478	2.24617			3.08333	3.2757	2.70248
3.08667	2.51596	2.24763			3.08667	3.27638	2.70093
3.09	2.51826	2.24602			3.09	3.2785	2.70223
3.09333	2.52272	2.24736			3.09333	3.27898	2.703
3.09667	2.52139	2.24703			3.09667	3.28084	2.70533
3.1	2.52007	2.2501			3.1	3.28113	2.7069
3.10333	2.52572	2.2534			3.10333	3.2821	2.70992
3.10667	2.52202	2.24932			3.10667	3.28132	2.71109
3.11	2.52694	2.24857			3.11	3.28212	2.71266
3.11333	2.52863	2.25363			3.11333	3.28075	2.71391
3.11667	2.52411	2.25148			3.11667	3.28146	2.71411
3.12	2.52908	2.25671			3.12	3.2821	2.71372
3.12333	2.52951	2.25642			3.12333	3.28207	2.71385
3.12667	2.53228	2.25596			3.12667	3.28143	2.71355
3.13	2.52951	2.25702			3.13	3.2852	2.711
3.13333	2.53272	2.25781			3.13333	3.28537	2.70875
3.13667	2.53661	2.26574			3.13667	3.28527	2.70948
3.14	2.53243	2.25428			3.14	3.28686	2.70905
3.14333	2.54253	2.26151			3.14333	3.28593	2.71078
3.14667	2.53742	2.25729			3.14667	3.28516	2.71144
3.15	2.539	2.26295			3.15	3.28482	2.71336
3.15333	2.54141	2.26565			3.15333	3.2855	2.71356
3.15667	2.54231	2.2633			3.15667	3.28699	2.71649
3.16	2.53976	2.26406			3.16	3.28804	2.71693
3.16333	2.54657	2.26653			3.16333	3.29087	2.72105
3.16667	2.54372	2.26562			3.16667	3.292	2.72169
3.17	2.54383	2.26651			3.17	3.29432	2.72349
3.17333	2.55	2.26367			3.17333	3.29255	2.72015
3.17667	2.54369	2.26836			3.17667	3.29536	2.71795
3.18	2.55125	2.27008			3.18	3.29335	2.71727
3.18333	2.55152	2.27474			3.18333	3.2955	2.71771
3.18667	2.55055	2.27238			3.18667	3.2942	2.71566
3.19	2.55587	2.27326			3.19	3.29638	2.71741
3.19333	2.5547	2.26833			3.19333	3.2948	2.7187
3.19667	2.55277	2.27342			3.19667	3.29695	2.72034
3.2	2.5568	2.27636			3.2	3.29576	2.71928
3.20333	2.55444	2.27449			3.20333	3.29722	2.72202
3.20667	2.55979	2.27672			3.20667	3.29848	2.72403
3.21	2.55694	2.27228			3.21	3.29995	2.72383
3.21333	2.56476	2.27718			3.21333	3.29814	2.72418
3.21667	2.55959	2.27866			3.21667	3.29938	2.7251
3.22	2.56718	2.28148			3.22	3.29811	2.72196
3.22333	2.56475	2.27817			3.22333	3.29807	2.71998
3.22667	2.56735	2.27958			3.22667	3.29786	2.72051
3.23	2.56737	2.28241			3.23	3.30128	2.72047
3.23333	2.56641	2.2851			3.23333	3.30056	2.72023
3.23667	2.56995	2.28047			3.23667	3.30246	2.72466
3.24	2.56951	2.28589			3.24	3.30135	2.72877
3.24333	2.56977	2.28457			3.24333	3.30249	2.73074
3.24667	2.57491	2.28389			3.24667	3.30207	2.72944
3.25	2.57317	2.28511			3.25	3.30348	2.7301
3.25333	2.57445	2.28836			3.25333	3.30332	2.72896
3.25667	2.5721	2.28608			3.25667	3.30525	2.72795
3.26	2.57685	2.28761			3.26	3.30373	2.72761
3.26333	2.5734	2.2885			3.26333	3.30396	2.73157
3.26667	2.57861	2.29021			3.26667	3.30381	2.73463
3.27	2.57806	2.28634			3.27	3.30495	2.73545
3.27333	2.58026	2.29135			3.27333	3.30365	2.73394
3.27667	2.58076	2.28803			3.27667	3.30682	2.73395
3.28	2.58176	2.29183			3.28	3.30662	2.73171
3.28333	2.58417	2.29274			3.28333	3.3092	2.73189
3.28667	2.58312	2.29228			3.28667	3.30912	2.73057
3.29	2.58577	2.29469			3.29	3.31031	2.73166
3.29333	2.58443	2.2961			3.29333	3.31168	2.73329
3.29667	2.58609	2.28961			3.29667	3.31353	2.73427
3.3	2.58899	2.29856			3.3	3.30984	2.73425
3.30333	2.58848	2.29601			3.30333	3.31133	2.73414
3.30667	2.59428	2.29624			3.30667	3.31306	2.73634
3.31	2.59151	2.29484			3.31	3.31135	2.73606
3.31333	2.5881	2.29881			3.31333	3.3113	2.73483
3.31667	2.59346	2.2964			3.31667	3.31687	2.73496
3.32	2.59616	2.30057			3.32	3.31691	2.7373
3.32333	2.59562	2.29968			3.32333	3.31744	2.737
3.32667	2.59625	2.3014			3.32667	3.3188	2.73743
3.33	2.59687	2.30002			3.33	3.32111	2.74053
3.33333	2.59871	2.30433			3.33333	3.31972	2.741
3.33667	2.5977	2.30072			3.33667	3.3201	2.74191
3.34	2.59985	2.30131			3.34	3.32152	2.74009
3.34333	2.60332	2.30247			3.34333	3.32194	2.74172
3.34667	2.60053	2.30151			3.34667	3.31941	2.73991
3.35	2.60289	2.30479			3.35	3.32086	2.73883
3.35333	2.59871	2.30498			3.35333	3.32026	2.73654
3.35667	2.60431	2.3071			3.35667	3.31854	2.74058
3.36	2.60616	2.30571			3.36	3.31877	2.73989
3.36333	2.60651	2.30551			3.36333	3.31945	2.74284
3.36667	2.60577	2.31184			3.36667	3.31909	2.74569
3.37	2.60444	2.30749			3.37	3.32	2.74905
3.37333	2.6086	2.30988			3.37333	3.32146	2.74765
3.37667	2.61292	2.31263			3.37667	3.32231	2.74793
3.38	2.6097	2.31113			3.38	3.32069	2.74678
3.38333	2.61164	2.31586			3.38333	3.32162	2.74527
3.38667	2.61586	2.31421			3.38667	3.32355	2.74531
3.39	2.61397	2.31231			3.39	3.32329	2.74519
3.39333	2.61523	2.31465			3.39333	3.32466	2.7453
3.39667	2.61362	2.31556			3.39667	3.32673	2.74708
3.4	2.61602	2.31585			3.4	3.32356	2.7474
3.40333	2.61667	2.31842			3.40333	3.32469	2.74765
3.40667	2.61706	2.31556			3.40667	3.32576	2.7493
3.41	2.61439	2.31587			3.41	3.32691	2.75131
3.41333	2.61799	2.31743			3.41333	3.32779	2.74985
3.41667	2.62237	2.31711			3.41667	3.33247	2.75149
3.42	2.6173	2.32367			3.42	3.33166	2.75109
3.42333	2.62066	2.31464			3.42333	3.33245	2.75064
3.42667	2.62532	2.3221			3.42667	3.33088	2.74768
3.43	2.62262	2.3208			3.43	3.33021	2.7501
3.43333	2.62685	2.32119			3.43333	3.32647	2.75113
3.43667	2.62444	2.32074			3.43667	3.32682	2.75012
3.44	2.62193	2.32128			3.44	3.32773	2.75153
3.44333	2.62293	2.3243			3.44333	3.32913	2.75498
3.44667	2.62804	2.32323			3.44667	3.33174	2.75359
3.45	2.62646	2.32317			3.45	3.33496	2.75121
3.45333	2.62822	2.31833			3.45333	3.33546	2.75247
3.45667	2.63254	2.32323			3.45667	3.33492	2.75078
3.46	2.62993	2.32258			3.46	3.33621	2.74931
3.46333	2.63118	2.3257			3.46333	3.33758	2.75122
3.46667	2.63326	2.3243			3.46667	3.3378	2.7537
3.47	2.63368	2.3263			3.47	3.33778	2.75516
3.47333	2.63723	2.32607			3.47333	3.3388	2.75657
3.47667	2.63064	2.33171			3.47667	3.33887	2.75917
3.48	2.63221	2.32985			3.48	3.33855	2.75862
3.48333	2.6373	2.3309			3.48333	3.33554	2.75906
3.48667	2.63237	2.32607			3.48667	3.33328	2.75684
3.49	2.63828	2.33159			3.49	3.33133	2.757
3.49333	2.63764	2.33051			3.49333	3.32879	2.7553
3.49667	2.63364	2.3326			3.49667	3.3277	2.75828
3.5	2.64097	2.33347			3.5	3.33104	2.75911
3.50333	2.63988	2.33249			3.50333	3.33405	2.76192
3.50667	2.64187	2.32823			3.50667	3.33433	2.76143
3.51	2.64299	2.33308			3.51	3.33761	2.76417
3.51333	2.64139	2.33103			3.51333	3.33854	2.76072
3.51667	2.6407	2.33412			3.51667	3.34084	2.76179
3.52	2.64157	2.33315			3.52	3.3421	2.75999
3.52333	2.64641	2.33745			3.52333	3.34489	2.76124
3.52667	2.6451	2.33515			3.52667	3.34324	2.76128
3.53	2.64296	2.34007			3.53	3.3446	2.76259
3.53333	2.64686	2.33637			3.53333	3.34317	2.76229
3.53667	2.64732	2.33655			3.53667	3.34117	2.76308
3.54	2.64982	2.33513			3.54	3.34033	2.76059
3.54333	2.64602	2.33716			3.54333	3.34166	2.75789
3.54667	2.64992	2.33756			3.54667	3.34082	2.76009
3.55	2.65138	2.33942			3.55	3.33984	2.7607
3.55333	2.65827	2.33972			3.55333	3.33964	2.75944
3.55667	2.65408	2.34114			3.55667	3.33925	2.764
3.56	2.65373	2.33959			3.56	3.33956	2.764
3.56333	2.65518	2.34118			3.56333	3.33903	2.76509
3.56667	2.65731	2.33995			3.56667	3.34265	2.76499
3.57	2.65856	2.34459			3.57	3.34594	2.7677
3.57333	2.65746	2.34546			3.57333	3.34506	2.76683
3.57667	2.65529	2.34035			3.57667	3.34343	2.76971
3.58	2.65921	2.3466			3.58	3.34546	2.76698
3.58333	2.65792	2.34528			3.58333	3.34209	2.76531
3.58667	2.65733	2.34623			3.58667	3.3398	2.76409
3.59	2.65957	2.34763			3.59	3.34135	2.76376
3.59333	2.66186	2.34244			3.59333	3.34356	2.76257
3.59667	2.66227	2.34524			3.59667	3.3425	2.76261
3.6	2.66178	2.34414			3.6	3.34719	2.76422
3.60333	2.66112	2.34084			3.60333	3.3495	2.76356
3.60667	2.66719	2.34886			3.60667	3.34995	2.76647
3.61	2.66188	2.35192			3.61	3.35191	2.76544
3.61333	2.66268	2.34964			3.61333	3.35311	2.76512
3.61667	2.66763	2.35195			3.61667	3.35086	2.7655
3.62	2.66705	2.34913			3.62	3.34911	2.77025
3.62333	2.66552	2.34494			3.62333	3.3497	2.77033
3.62667	2.66967	2.35381			3.62667	3.34921	2.77255
3.63	2.66918	2.35055			3.63	3.34952	2.77393
3.63333	2.67024	2.3515			3.63333	3.34915	2.77276
3.63667	2.668	2.35466			3.63667	3.3509	2.77124
3.64	2.6685	2.35162			3.64	3.35078	2.76914
3.64333	2.66839	2.35125			3.64333	3.35112	2.76923
3.64667	2.67191	2.34961			3.64667	3.35082	2.77158
3.65	2.67046	2.35059			3.65	3.35401	2.77208
3.65333	2.67024	2.35169			3.65333	3.35489	2.77274
3.65667	2.67103	2.35312			3.65667	3.35697	2.77373
3.66	2.67087	2.35616			3.66	3.35615	2.775
3.66333	2.67638	2.35065			3.66333	3.3578	2.77287
3.66667	2.67664	2.35634			3.66667	3.35539	2.77396
3.67	2.67557	2.35433			3.67	3.3554	2.77452
3.67333	2.67549	2.35512			3.67333	3.355	2.77401
3.67667	2.6796	2.35568			3.67667	3.35589	2.77688
3.68	2.6772	2.35512			3.68	3.35454	2.77831
3.68333	2.67679	2.35589			3.68333	3.3567	2.77631
3.68667	2.67749	2.35937			3.68667	3.3564	2.77736
3.69	2.67401	2.35717			3.69	3.35691	2.77931
3.69333	2.67671	2.36008			3.69333	3.35651	2.776
3.69667	2.67977	2.35641			3.69667	3.35691	2.77704
3.7	2.68355	2.36198			3.7	3.35844	2.77976
3.70333	2.67733	2.35669			3.70333	3.35878	2.78058
3.70667	2.67965	2.35659			3.70667	3.35782	2.78074
3.71	2.67861	2.36187			3.71	3.36088	2.78231
3.71333	2.68031	2.35858			3.71333	3.36144	2.78206
3.71667	2.68082	2.35861			3.71667	3.35931	2.78277
3.72	2.68497	2.3597			3.72	3.36215	2.78075
3.72333	2.68348	2.35589			3.72333	3.36434	2.78023
3.72667	2.68446	2.36142			3.72667	3.36493	2.78073
3.73	2.69	2.36165			3.73	3.36691	2.78014
3.73333	2.68583	2.35998			3.73333	3.36683	2.77974
3.73667	2.68676	2.36435			3.73667	3.36543	2.77926
3.74	2.68591	2.36503			3.74	3.3659	2.77893
3.74333	2.69312	2.36475			3.74333	3.36594	2.77676
3.74667	2.68921	2.36571			3.74667	3.36528	2.77718
3.75	2.69025	2.36205			3.75	3.36519	2.77807
3.75333	2.6922	2.36953			3.75333	3.36374	2.77972
3.75667	2.69052	2.36369			3.75667	3.36241	2.78072
3.76	2.69713	2.36952			3.76	3.35953	2.7834
3.76333	2.69089	2.36576			3.76333	3.36002	2.78367
3.76667	2.69648	2.36604			3.76667	3.3614	2.78467
3.77	2.69617	2.37136			3.77	3.36466	2.78377
3.77333	2.69542	2.36614			3.77333	3.3655	2.78316
3.77667	2.69371	2.36864			3.77667	3.36679	2.78258
3.78	2.69678	2.36955			3.78	3.36612	2.78321
3.78333	2.69763	2.37302			3.78333	3.36909	2.78297
3.78667	2.6963	2.36913			3.78667	3.37016	2.78367
3.79	2.69699	2.36937			3.79	3.37095	2.78606
3.79333	2.69467	2.36563			3.79333	3.37214	2.78471
3.79667	2.70011	2.36867			3.79667	3.37587	2.78476
3.8	2.69801	2.37394			3.8	3.37315	2.78648
3.80333	2.69817	2.37403			3.80333	3.37328	2.78817
3.80667	2.69628	2.37128			3.80667	3.37457	2.78844
3.81	2.70313	2.37224			3.81	3.37412	2.78822
3.81333	2.70134	2.37086			3.81333	3.37283	2.7887
3.81667	2.70324	2.36721			3.81667	3.37492	2.78763
3.82	2.70138	2.37418			3.82	3.37178	2.7878
3.82333	2.70061	2.37002			3.82333	3.37069	2.78661
3.82667	2.70575	2.37688			3.82667	3.37208	2.79046
3.83	2.70285	2.37753			3.83	3.37264	2.78952
3.83333	2.70481	2.37247			3.83333	3.37134	2.7915
3.83667	2.70834	2.37653			3.83667	3.37326	2.79211
3.84	2.70384	2.37466			3.84	3.37463	2.79225
3.84333	2.70455	2.37218			3.84333	3.37533	2.78833
3.84667	2.70387	2.37642			3.84667	3.37546	2.78789
3.85	2.70688	2.37895			3.85	3.37811	2.78916
3.85333	2.70671	2.37566			3.85333	3.37898	2.78661
3.85667	2.7075	2.37526			3.85667	3.37978	2.78686
3.86	2.71189	2.37896			3.86	3.38105	2.7899
3.86333	2.70777	2.37701			3.86333	3.38113	2.79222
3.86667	2.71296	2.37784			3.86667	3.38062	2.79082
3.87	2.70743	2.3761			3.87	3.38136	2.79249
3.87333	2.71145	2.37716			3.87333	3.38227	2.79243
3.87667	2.71115	2.37961			3.87667	3.38084	2.79104
3.88	2.71248	2.37798			3.88	3.38031	2.79007
3.88333	2.71432	2.37789			3.88333	3.38129	2.78998
3.88667	2.7162	2.37913			3.88667	3.38093	2.79152
3.89	2.70986	2.37976			3.89	3.37887	2.79163
3.89333	2.71111	2.38218			3.89333	3.37926	2.79269
3.89667	2.71569	2.38554			3.89667	3.38139	2.79385
3.9	2.7148	2.38325			3.9	3.38016	2.7934
3.90333	2.71273	2.38066			3.90333	3.3799	2.79264
3.90667	2.715	2.3857			3.90667	3.3807	2.79126
3.91	2.71474	2.38301			3.91	3.38209	2.79239
3.91333	2.71132	2.384			3.91333	3.38024	2.79321
3.91667	2.7166	2.38328			3.91667	3.38166	2.7926
3.92	2.71768	2.38227			3.92	3.38241	2.79267
3.92333	2.71444	2.383			3.92333	3.38316	2.79447
3.92667	2.72063	2.38694			3.92667	3.38161	2.7941
3.93	2.7157	2.38856			3.93	3.38413	2.79375
3.93333	2.71822	2.38704			3.93333	3.38284	2.79511
3.93667	2.71704	2.38189			3.93667	3.3819	2.79692
3.94	2.72261	2.38635			3.94	3.38181	2.7971
3.94333	2.71931	2.38602			3.94333	3.38265	2.79901
3.94667	2.72044	2.38554			3.94667	3.38287	2.7984
3.95	2.72651	2.38566			3.95	3.38313	2.79982
3.95333	2.72103	2.38815			3.95333	3.38284	2.79967
3.95667	2.72534	2.38953			3.95667	3.38173	2.80109
3.96	2.72061	2.38894			3.96	3.38033	2.80083
3.96333	2.72761	2.39245			3.96333	3.37986	2.80003
3.96667	2.72194	2.3908			3.96667	3.38116	2.79768
3.97	2.72064	2.38729			3.97	3.38237	2.7973
3.97333	2.72789	2.38991			3.97333	3.38363	2.79861
3.97667	2.7218	2.38665			3.97667	3.38356	2.79679
3.98	2.72711	2.39213			3.98	3.38114	2.80093
3.98333	2.72727	2.38824			3.98333	3.38189	2.80349
3.98667	2.72716	2.39067			3.98667	3.3834	2.80237
3.99	2.72638	2.38811			3.99	3.38247	2.79894
3.99333	2.73	2.39374			3.99333	3.38289	2.80053
3.99667	2.72612	2.3889			3.99667	3.38504	2.79905
4	2.72623	2.39042			4	3.38261	2.79804
4.00333	2.7262	2.38612			4.00333	3.38429	2.80057
4.00667	2.72757	2.39416			4.00667	3.38705	2.80319
4.01	2.73152	2.38599			4.01	3.38808	2.80141
4.01333	2.7305	2.39207			4.01333	3.38779	2.80228
4.01667	2.73252	2.39029			4.01667	3.39044	2.803
4.02	2.7353	2.3901			4.02	3.39195	2.80253
4.02333	2.73024	2.39777			4.02333	3.39152	2.80355
4.02667	2.73042	2.39042			4.02667	3.39425	2.80423
4.03	2.73131	2.3933			4.03	3.39622	2.80193
4.03333	2.73127	2.39641			4.03333	3.39649	2.80408
4.03667	2.73176	2.38992			4.03667	3.39479	2.80076
4.04	2.73116	2.39667			4.04	3.39554	2.80008
4.04333	2.73449	2.39016			4.04333	3.39487	2.80071
4.04667	2.73563	2.39395			4.04667	3.39449	2.80187
4.05	2.72987	2.39058			4.05	3.39425	2.79954
4.05333	2.73509	2.3958			4.05333	3.39463	2.80358
4.05667	2.73543	2.39613			4.05667	3.39509	2.80561
4.06	2.73648	2.39769			4.06	3.39537	2.80554
4.06333	2.73921	2.39452			4.06333	3.39574	2.8065
4.06667	2.74135	2.40049			4.06667	3.39641	2.8056
4.07	2.73603	2.39787			4.07	3.3954	2.80415
4.07333	2.73702	2.39932			4.07333	3.39584	2.80201
4.07667	2.73581	2.39701			4.07667	3.39548	2.80372
4.08	2.73767	2.40287			4.08	3.39278	2.80547
4.08333	2.73726	2.39631			4.08333	3.39197	2.80751
4.08667	2.73964	2.39615			4.08667	3.3922	2.80907
4.09	2.73988	2.39676			4.09	3.39129	2.80874
4.09333	2.74047	2.39521			4.09333	3.39047	2.81036
4.09667	2.74359	2.39628			4.09667	3.39225	2.80835
4.1	2.73793	2.39647			4.1	3.39245	2.80902
4.10333	2.7422	2.39359			4.10333	3.39577	2.80945
4.10667	2.73981	2.39921			4.10667	3.39599	2.81161
4.11	2.74071	2.39901			4.11	3.39723	2.80927
4.11333	2.74286	2.40159			4.11333	3.39914	2.81099
4.11667	2.74447	2.40321			4.11667	3.4011	2.81152
4.12	2.74424	2.40338			4.12	3.4	2.8101
4.12333	2.74006	2.39772			4.12333	3.40125	2.81035
4.12667	2.75386	2.40228			4.12667	3.4031	2.81059
4.13	2.74305	2.40076			4.13	3.40382	2.81014
4.13333	2.74828	2.40022			4.13333	3.40273	2.80983
4.13667	2.7441	2.39985			4.13667	3.40137	2.81216
4.14	2.7465	2.40191			4.14	3.40246	2.81055
4.14333	2.75174	2.40123			4.14333	3.40139	2.81135
4.14667	2.74706	2.4039			4.14667	3.39864	2.81065
4.15	2.74982	2.4045			4.15	3.39822	2.81189
4.15333	2.74884	2.40474			4.15333	3.40063	2.81232
4.15667	2.75014	2.40697			4.15667	3.39904	2.81363
4.16	2.75341	2.40291			4.16	3.40037	2.8121
4.16333	2.74819	2.40085			4.16333	3.40204	2.81301
4.16667	2.74972	2.40028			4.16667	3.40129	2.81252
4.17	2.75347	2.40645			4.17	3.40147	2.81258
4.17333	2.74974	2.40758			4.17333	3.4037	2.81381
4.17667	2.75036	2.40743			4.17667	3.40328	2.81649
4.18	2.75135	2.39935			4.18	3.40387	2.81713
4.18333	2.7533	2.40624			4.18333	3.40752	2.81702
4.18667	2.75439	2.40669			4.18667	3.4078	2.81698
4.19	2.75316	2.40741			4.19	3.40699	2.81573
4.19333	2.75405	2.40694			4.19333	3.40651	2.81686
4.19667	2.75216	2.40169			4.19667	3.40825	2.81622
4.2	2.75079	2.40748			4.2	3.40764	2.81448
4.20333	2.75242	2.40608			4.20333	3.40729	2.8146
4.20667	2.75583	2.40548			4.20667	3.40781	2.81514
4.21	2.75572	2.40877			4.21	3.4081	2.81353
4.21333	2.7565	2.40775			4.21333	3.40672	2.81529
4.21667	2.7535	2.40944			4.21667	3.40741	2.81732
4.22	2.75483	2.40774			4.22	3.4064	2.81805
4.22333	2.75861	2.40587			4.22333	3.40662	2.81682
4.22667	2.75759	2.40244			4.22667	3.40613	2.81845
4.23	2.75988	2.4066			4.23	3.40712	2.81627
4.23333	2.75431	2.40321			4.23333	3.40709	2.81588
4.23667	2.75924	2.41094			4.23667	3.40813	2.81593
4.24	2.75754	2.40526			4.24	3.40686	2.81769
4.24333	2.76073	2.40895			4.24333	3.40855	2.81693
4.24667	2.75166	2.40965			4.24667	3.40753	2.81867
4.25	2.76035	2.41094			4.25	3.40655	2.81849
4.25333	2.76063	2.40831			4.25333	3.40559	2.81656
4.25667	2.75732	2.40811			4.25667	3.40573	2.81676
4.26	2.75965	2.40776			4.26	3.40511	2.8162
4.26333	2.76014	2.40882			4.26333	3.40607	2.81718
4.26667	2.76776	2.40831			4.26667	3.40609	2.81943
4.27	2.76178	2.41341			4.27	3.40498	2.81991
4.27333	2.76125	2.40731			4.27333	3.40464	2.81982
4.27667	2.76511	2.41328			4.27667	3.40469	2.82167
4.28	2.76126	2.40698			4.28	3.4037	2.82099
4.28333	2.76092	2.40967			4.28333	3.40576	2.81953
4.28667	2.76286	2.41378			4.28667	3.40593	2.82153
4.29	2.76276	2.41222			4.29	3.4075	2.82338
4.29333	2.76157	2.4118			4.29333	3.40647	2.82321
4.29667	2.7609	2.41078			4.29667	3.40876	2.82382
4.3	2.76302	2.4144			4.3	3.40874	2.82259
4.30333	2.76091	2.41065			4.30333	3.4117	2.8207
4.30667	2.76094	2.41119			4.30667	3.41103	2.81957
4.31	2.76462	2.41255			4.31	3.41227	2.81781
4.31333	2.76222	2.40859			4.31333	3.40984	2.81837
4.31667	2.76818	2.41483			4.31667	3.40873	2.82102
4.32	2.76617	2.41659			4.32	3.40767	2.82178
4.32333	2.7668	2.4184			4.32333	3.40859	2.82253
4.32667	2.76844	2.41378			4.32667	3.40798	2.82425
4.33	2.76659	2.41777			4.33	3.40847	2.82157
4.33333	2.76709	2.41596			4.33333	3.4092	2.81901
4.33667	2.77086	2.41436			4.33667	3.41218	2.82087
4.34	2.76933	2.41705			4.34	3.41128	2.82352
4.34333	2.77098	2.41223			4.34333	3.41249	2.8242
4.34667	2.76611	2.41479			4.34667	3.41339	2.82658
4.35	2.76925	2.41946			4.35	3.4134	2.82929
4.35333	2.76806	2.41346			4.35333	3.41227	2.82742
4.35667	2.77358	2.41514			4.35667	3.41306	2.82386
4.36	2.77482	2.414			4.36	3.41529	2.82279
4.36333	2.77012	2.41653			4.36333	3.41701	2.82271
4.36667	2.77103	2.41951			4.36667	3.41803	2.82171
4.37	2.77135	2.41651			4.37	3.4162	2.82501
4.37333	2.76857	2.41627			4.37333	3.4165	2.82617
4.37667	2.77333	2.41563			4.37667	3.41577	2.82769
4.38	2.77969	2.42123			4.38	3.41618	2.82905
4.38333	2.76953	2.4145			4.38333	3.41603	2.83103
4.38667	2.77233	2.41594			4.38667	3.41592	2.82945
4.39	2.77354	2.41427			4.39	3.41813	2.82961
4.39333	2.77528	2.41846			4.39333	3.41842	2.83006
4.39667	2.77429	2.41669			4.39667	3.41855	2.83026
4.4	2.77475	2.41819			4.4	3.41936	2.82791
4.40333	2.77098	2.4201			4.40333	3.41941	2.82758
4.40667	2.77613	2.41384			4.40667	3.41768	2.82675
4.41	2.77532	2.41723			4.41	3.41782	2.82509
4.41333	2.77481	2.42345			4.41333	3.41757	2.82508
4.41667	2.77913	2.42087			4.41667	3.41661	2.82552
4.42	2.77794	2.41754			4.42	3.41806	2.82548
4.42333	2.77199	2.41515			4.42333	3.41941	2.82684
4.42667	2.7787	2.41806			4.42667	3.42014	2.82705
4.43	2.7754	2.42182			4.43	3.42064	2.82395
4.43333	2.77812	2.41973			4.43333	3.42234	2.82611
4.43667	2.77786	2.41892			4.43667	3.424	2.82954
4.44	2.77388	2.41639			4.44	3.42347	2.8296
4.44333	2.77671	2.41781			4.44333	3.42283	2.83216
4.44667	2.77885	2.41982			4.44667	3.42277	2.83594
4.45	2.77858	2.41914			4.45	3.42236	2.83632
4.45333	2.78024	2.42696			4.45333	3.42008	2.83256
4.45667	2.78026	2.42229			4.45667	3.42111	2.83225
4.46	2.78133	2.41826			4.46	3.42174	2.83023
4.46333	2.78207	2.42504			4.46333	3.42231	2.82867
4.46667	2.78041	2.42252			4.46667	3.42203	2.82623
4.47	2.78359	2.42163			4.47	3.42145	2.82717
4.47333	2.78276	2.42795			4.47333	3.42065	2.82787
4.47667	2.7821	2.42162			4.47667	3.41908	2.83126
4.48	2.78203	2.42369			4.48	3.41996	2.83332
4.48333	2.78409	2.42385			4.48333	3.41994	2.83272
4.48667	2.78273	2.42504			4.48667	3.41986	2.8338
4.49	2.78346	2.42454			4.49	3.41997	2.83616
4.49333	2.78172	2.42105			4.49333	3.4202	2.8343
4.49667	2.78299	2.42864			4.49667	3.41984	2.83171
4.5	2.78399	2.42242			4.5	3.42049	2.83396
4.50333	2.7847	2.42376			4.50333	3.42396	2.83258
4.50667	2.7822	2.42258			4.50667	3.4229	2.83066
4.51	2.78315	2.42255			4.51	3.426	2.83052
4.51333	2.78459	2.42267			4.51333	3.42448	2.83305
4.51667	2.78519	2.4232			4.51667	3.42515	2.83388
4.52	2.78682	2.42253			4.52	3.42402	2.83531
4.52333	2.78256	2.41938			4.52333	3.42795	2.83562
4.52667	2.78709	2.42491			4.52667	3.42756	2.83524
4.53	2.78737	2.42127			4.53	3.42877	2.83685
4.53333	2.78529	2.4233			4.53333	3.42748	2.83628
4.53667	2.78936	2.42544			4.53667	3.42824	2.83503
4.54	2.7839	2.42632			4.54	3.42793	2.83451
4.54333	2.78736	2.42273			4.54333	3.42727	2.83758
4.54667	2.78782	2.4228			4.54667	3.42616	2.83617
4.55	2.79017	2.42522			4.55	3.42661	2.83429
4.55333	2.78569	2.4223			4.55333	3.42899	2.83694
4.55667	2.78844	2.42889			4.55667	3.42729	2.83875
4.56	2.78926	2.42709			4.56	3.4259	2.83808
4.56333	2.78835	2.42524			4.56333	3.4264	2.83726
4.56667	2.79001	2.42549			4.56667	3.42632	2.84025
4.57	2.79092	2.42797			4.57	3.42538	2.83737
4.57333	2.79303	2.42892			4.57333	3.42418	2.83664
4.57667	2.79269	2.42821			4.57667	3.42514	2.83482
4.58	2.7925	2.42698			4.58	3.4265	2.83421
4.58333	2.79335	2.42918			4.58333	3.42753	2.83326
4.58667	2.79142	2.42567			4.58667	3.42708	2.83654
4.59	2.79228	2.43392			4.59	3.42877	2.8352
4.59333	2.78996	2.42664			4.59333	3.42936	2.83658
4.59667	2.79292	2.43056			4.59667	3.43059	2.83765
4.6	2.79587	2.42928			4.6	3.43079	2.83828
4.60333	2.78947	2.42807			4.60333	3.43174	2.83749
4.60667	2.78719	2.43263			4.60667	3.43018	2.83809
4.61	2.7926	2.43086			4.61	3.43145	2.83798
4.61333	2.79342	2.42875			4.61333	3.43068	2.83688
4.61667	2.79267	2.43191			4.61667	3.43184	2.83815
4.62	2.79853	2.43117			4.62	3.43229	2.83928
4.62333	2.79474	2.43534			4.62333	3.43454	2.83783
4.62667	2.79325	2.42554			4.62667	3.43519	2.83681
4.63	2.7927	2.43188			4.63	3.43559	2.83952
4.63333	2.7977	2.42736			4.63333	3.4356	2.83957
4.63667	2.79533	2.42595			4.63667	3.43691	2.83961
4.64	2.79847	2.42914			4.64	3.43618	2.8407
4.64333	2.79591	2.42999			4.64333	3.43628	2.84074
4.64667	2.79643	2.42673			4.64667	3.4362	2.83936
4.65	2.79624	2.43052			4.65	3.43546	2.83871
4.65333	2.80029	2.42978			4.65333	3.43213	2.83908
4.65667	2.79881	2.42932			4.65667	3.43291	2.84202
4.66	2.7969	2.43417			4.66	3.43112	2.84252
4.66333	2.79742	2.43173			4.66333	3.43117	2.84333
4.66667	2.79702	2.42975			4.66667	3.43131	2.84256
4.67	2.79611	2.43174			4.67	3.4341	2.84224
4.67333	2.79426	2.4313			4.67333	3.43444	2.84051
4.67667	2.80118	2.43227			4.67667	3.43697	2.84035
4.68	2.80021	2.42914			4.68	3.43827	2.84308
4.68333	2.79693	2.43031			4.68333	3.43949	2.84533
4.68667	2.79913	2.42977			4.68667	3.43882	2.847
4.69	2.79536	2.43152			4.69	3.43888	2.84816
4.69333	2.80154	2.43066			4.69333	3.438	2.8478
4.69667	2.79784	2.43336			4.69667	3.43698	2.84532
4.7	2.79805	2.43126			4.7	3.43777	2.84319
4.70333	2.80151	2.43013			4.70333	3.4397	2.84025
4.70667	2.80015	2.42591			4.70667	3.43965	2.84053
4.71	2.80077	2.42793			4.71	3.44067	2.84283
4.71333	2.79984	2.43245			4.71333	3.44074	2.84501
4.71667	2.80408	2.43681			4.71667	3.43856	2.84552
4.72	2.79925	2.43079			4.72	3.43594	2.84709
4.72333	2.80221	2.43462			4.72333	3.43956	2.84571
4.72667	2.80437	2.43551			4.72667	3.43904	2.84878
4.73	2.79989	2.43383			4.73	3.44025	2.84624
4.73333	2.80357	2.43435			4.73333	3.44178	2.84503
4.73667	2.80262	2.43836			4.73667	3.44362	2.84467
4.74	2.80568	2.43301			4.74	3.44116	2.84614
4.74333	2.79934	2.43417			4.74333	3.44041	2.84129
4.74667	2.80228	2.43364			4.74667	3.44133	2.84007
4.75	2.8001	2.43214			4.75	3.44188	2.84345
4.75333	2.80526	2.43473			4.75333	3.44237	2.84404
4.75667	2.80249	2.43869			4.75667	3.44256	2.84586
4.76	2.80018	2.43408			4.76	3.444	2.85046
4.76333	2.80508	2.43774			4.76333	3.44331	2.85283
4.76667	2.79862	2.43133			4.76667	3.44307	2.84995
4.77	2.80649	2.4354			4.77	3.44229	2.84795
4.77333	2.80365	2.43206			4.77333	3.44322	2.84715
4.77667	2.80578	2.43543			4.77667	3.44255	2.84582
4.78	2.80128	2.43755			4.78	3.4399	2.84604
4.78333	2.80697	2.43302			4.78333	3.43968	2.8485
4.78667	2.80757	2.43773			4.78667	3.43964	2.84918
4.79	2.80831	2.43536			4.79	3.44056	2.84736
4.79333	2.80816	2.43641			4.79333	3.44273	2.84551
4.79667	2.81055	2.43629			4.79667	3.44698	2.84543
4.8	2.80842	2.43438			4.8	3.44908	2.84697
4.80333	2.81069	2.43963			4.80333	3.45072	2.85119
4.80667	2.80828	2.43557			4.80667	3.44969	2.8524
4.81	2.80462	2.43271			4.81	3.44833	2.8522
4.81333	2.80651	2.44016			4.81333	3.44658	2.85127
4.81667	2.80416	2.4388			4.81667	3.44483	2.84978
4.82	2.80576	2.43577			4.82	3.44328	2.8488
4.82333	2.80699	2.43524			4.82333	3.44465	2.84899
4.82667	2.81026	2.43692			4.82667	3.4447	2.85171
4.83	2.80997	2.43741			4.83	3.44644	2.85203
4.83333	2.80793	2.4332			4.83333	3.44759	2.85087
4.83667	2.80695	2.4363			4.83667	3.44853	2.85078
4.84	2.80683	2.43669			4.84	3.44661	2.85417
4.84333	2.81123	2.43941			4.84333	3.44567	2.8518
4.84667	2.80609	2.43789			4.84667	3.44467	2.85397
4.85	2.81552	2.43709			4.85	3.44398	2.8555
4.85333	2.80922	2.4424			4.85333	3.44434	2.85303
4.85667	2.8102	2.43727			4.85667	3.44662	2.85007
4.86	2.80911	2.43662			4.86	3.44712	2.85021
4.86333	2.81027	2.44166			4.86333	3.44861	2.84892
4.86667	2.81513	2.43524			4.86667	3.44807	2.84817
4.87	2.81282	2.43872			4.87	3.44795	2.85078
4.87333	2.81434	2.44584			4.87333	3.44732	2.8511
4.87667	2.80806	2.43782			4.87667	3.44967	2.8516
4.88	2.81006	2.44181			4.88	3.44847	2.85086
4.88333	2.8179	2.44216			4.88333	3.45123	2.85316
4.88667	2.81308	2.43773			4.88667	3.45213	2.85365
4.89	2.81453	2.44222			4.89	3.45013	2.8538
4.89333	2.81516	2.43974			4.89333	3.4485	2.8523
4.89667	2.81803	2.44094			4.89667	3.44999	2.85458
4.9	2.81492	2.44051			4.9	3.44799	2.85396
4.90333	2.81544	2.44143			4.90333	3.44908	2.85546
4.90667	2.81521	2.43734			4.90667	3.45135	2.85549
4.91	2.81448	2.43775			4.91	3.45287	2.85672
4.91333	2.8167	2.44591			4.91333	3.45273	2.85354
4.91667	2.81634	2.44587			4.91667	3.45325	2.85179
4.92	2.81751	2.44442			4.92	3.45197	2.85013
4.92333	2.81742	2.4403			4.92333	3.45166	2.85256
4.92667	2.82005	2.43595			4.92667	3.45157	2.85312
4.93	2.81846	2.4438			4.93	3.45214	2.85521
4.93333	2.81615	2.44972			4.93333	3.45361	2.85871
4.93667	2.82136	2.44236			4.93667	3.45389	2.8578
4.94	2.81757	2.43935			4.94	3.45435	2.85548
4.94333	2.81907	2.43993			4.94333	3.45434	2.85611
4.94667	2.81878	2.44265			4.94667	3.45242	2.85679
4.95	2.81902	2.44146			4.95	3.45285	2.85655
4.95333	2.81729	2.4443			4.95333	3.45323	2.85658
4.95667	2.81978	2.44505			4.95667	3.45435	2.8588
4.96	2.81875	2.44137			4.96	3.45395	2.85682
4.96333	2.81914	2.43554			4.96333	3.45559	2.8576
4.96667	2.82111	2.44579			4.96667	3.45507	2.8568
4.97	2.81727	2.44203			4.97	3.45549	2.86056
4.97333	2.82148	2.44243			4.97333	3.4554	2.85548
4.97667	2.81673	2.44077			4.97667	3.45552	2.85706
4.98	2.81977	2.43855			4.98	3.45648	2.85817
4.98333	2.81403	2.44029			4.98333	3.45696	2.85835
4.98667	2.81969	2.43738			4.98667	3.45779	2.85641
4.99	2.81961	2.44395			4.99	3.45734	2.85833
4.99333	2.81813	2.44488			4.99333	3.459	2.85814
4.99667	2.82468	2.4414			4.99667	3.45817	2.85607
5	2.8232	2.43907			5	3.45707	2.85545
5.00333	2.8187	2.442			5.00333	3.4553	2.85476
5.00667	2.82167	2.44413			5.00667	3.45518	2.85642
5.01	2.81968	2.44502			5.01	3.45507	2.85842
5.01333	2.82536	2.44337			5.01333	3.45433	2.85882
5.01667	2.8209	2.44368			5.01667	3.4553	2.85809
5.02	2.82797	2.44638			5.02	3.45612	2.85723
5.02333	2.82098	2.44166			5.02333	3.45837	2.85833
5.02667	2.81949	2.44051			5.02667	3.45868	2.85931
5.03	2.82473	2.44414			5.03	3.46001	2.86158
5.03333	2.82316	2.44298			5.03333	3.46038	2.86312
5.03667	2.82401	2.44324			5.03667	3.46098	2.86517
5.04	2.81961	2.43797			5.04	3.45952	2.86383
5.04333	2.81975	2.44471			5.04333	3.46032	2.86218
5.04667	2.82614	2.4439			5.04667	3.45926	2.85948
5.05	2.8228	2.44262			5.05	3.45976	2.85938
5.05333	2.8254	2.44212			5.05333	3.46011	2.86031
5.05667	2.82433	2.44236			5.05667	3.46175	2.86206
5.06	2.82129	2.44344			5.06	3.46128	2.86251
5.06333	2.81966	2.44228			5.06333	3.46231	2.86298
5.06667	2.8285	2.44359			5.06667	3.46187	2.86413
5.07	2.82283	2.44307			5.07	3.46175	2.86163
5.07333	2.81867	2.43997			5.07333	3.46116	2.862
5.07667	2.82519	2.44645			5.07667	3.46059	2.86246
5.08	2.82625	2.44464			5.08	3.46109	2.86383
5.08333	2.82206	2.44421			5.08333	3.46257	2.8626
5.08667	2.82812	2.44776			5.08667	3.46153	2.86458
5.09	2.82456	2.44247			5.09	3.46323	2.86195
5.09333	2.82527	2.44622			5.09333	3.46395	2.86144
5.09667	2.82631	2.44587			5.09667	3.46414	2.86134
5.1	2.82787	2.44363			5.1	3.46296	2.86198
5.10333	2.827	2.4482			5.10333	3.46563	2.86114
5.10667	2.8278	2.4463			5.10667	3.46417	2.86253
5.11	2.82884	2.44695			5.11	3.46607	2.86353
5.11333	2.82551	2.44789			5.11333	3.46603	2.86456
5.11667	2.82903	2.44502			5.11667	3.4668	2.86749
5.12	2.82663	2.44841			5.12	3.46688	2.86755
5.12333	2.82844	2.45111			5.12333	3.46676	2.86912
5.12667	2.83165	2.4419			5.12667	3.46465	2.86953
5.13	2.83019	2.44189			5.13	3.46456	2.86841
5.13333	2.82782	2.44727			5.13333	3.46582	2.86688
5.13667	2.82987	2.44512			5.13667	3.46701	2.86914
5.14	2.82459	2.44538			5.14	3.468	2.86592
5.14333	2.82965	2.44942			5.14333	3.46991	2.86352
5.14667	2.8298	2.44787			5.14667	3.47097	2.86533
5.15	2.832	2.44836			5.15	3.46988	2.86537
5.15333	2.82949	2.44503			5.15333	3.46764	2.86599
5.15667	2.83579	2.44998			5.15667	3.46853	2.86829
5.16	2.8337	2.44845			5.16	3.46762	2.87033
5.16333	2.82727	2.44772			5.16333	3.4674	2.8704
5.16667	2.82977	2.44617			5.16667	3.46761	2.86821
5.17	2.83251	2.45132			5.17	3.46904	2.86787
5.17333	2.83274	2.44767			5.17333	3.46741	2.86812
5.17667	2.83251	2.44928			5.17667	3.46712	2.86664
5.18	2.82849	2.44783			5.18	3.46633	2.8648
5.18333	2.83484	2.44573			5.18333	3.46675	2.8657
5.18667	2.83371	2.4518			5.18667	3.46465	2.86367
5.19	2.83513	2.4484			5.19	3.46555	2.86446
5.19333	2.8318	2.4509			5.19333	3.46506	2.86625
5.19667	2.83441	2.45311			5.19667	3.4659	2.86455
5.2	2.83399	2.45089			5.2	3.46295	2.86553
5.20333	2.83245	2.44994			5.20333	3.46338	2.86673
5.20667	2.83416	2.4466			5.20667	3.4632	2.86497
5.21	2.83545	2.44679			5.21	3.46372	2.86561
5.21333	2.83369	2.45008			5.21333	3.46118	2.86843
5.21667	2.83198	2.44949			5.21667	3.46277	2.86901
5.22	2.83419	2.4496			5.22	3.46342	2.86712
5.22333	2.83453	2.45211			5.22333	3.46385	2.86842
5.22667	2.82852	2.4462			5.22667	3.46105	2.86923
5.23	2.83492	2.45076			5.23	3.46359	2.86976
5.23333	2.83304	2.45032			5.23333	3.46325	2.86963
5.23667	2.83567	2.45678			5.23667	3.46451	2.87158
5.24	2.8386	2.45198			5.24	3.46431	2.87015
5.24333	2.83555	2.45083			5.24333	3.46691	2.86744
5.24667	2.83521	2.4519			5.24667	3.46755	2.86702
5.25	2.83671	2.45016			5.25	3.46912	2.86921
5.25333	2.83824	2.44742			5.25333	3.46999	2.87113
5.25667	2.83878	2.44635			5.25667	3.47081	2.87116
5.26	2.83441	2.44982			5.26	3.47119	2.87066
5.26333	2.83304	2.44765			5.26333	3.47117	2.87084
5.26667	2.83391	2.45137			5.26667	3.47232	2.86748
5.27	2.8346	2.45209			5.27	3.47169	2.86448
5.27333	2.8397	2.44954			5.27333	3.47178	2.86663
5.27667	2.83232	2.44649			5.27667	3.47358	2.87038
5.28	2.83793	2.45078			5.28	3.47268	2.87016
5.28333	2.83849	2.44887			5.28333	3.47121	2.87255
5.28667	2.83949	2.44977			5.28667	3.46972	2.874
5.29	2.84187	2.44981			5.29	3.46889	2.87329
5.29333	2.83887	2.44784			5.29333	3.46796	2.87134
5.29667	2.83812	2.45205			5.29667	3.46607	2.87106
5.3	2.84049	2.44827			5.3	3.46646	2.87055
5.30333	2.83864	2.44953			5.30333	3.46769	2.8686
5.30667	2.83437	2.4534			5.30667	3.46727	2.86992
5.31	2.8427	2.45001			5.31	3.46691	2.87307
5.31333	2.8373	2.45052			5.31333	3.46999	2.87277
5.31667	2.83869	2.448			5.31667	3.47185	2.87186
5.32	2.83846	2.4474			5.32	3.47168	2.87286
5.32333	2.8367	2.45446			5.32333	3.47246	2.87099
5.32667	2.84455	2.44878			5.32667	3.47264	2.87056
5.33	2.83358	2.45325			5.33	3.47365	2.87248
5.33333	2.83959	2.45112			5.33333	3.47365	2.87335
5.33667	2.8384	2.45177			5.33667	3.47559	2.87385
5.34	2.83484	2.44837			5.34	3.4764	2.87605
5.34333	2.83979	2.45239			5.34333	3.47732	2.87695
5.34667	2.8397	2.44847			5.34667	3.47812	2.87559
5.35	2.83923	2.4534			5.35	3.4776	2.87658
5.35333	2.83783	2.45593			5.35333	3.47625	2.8774
5.35667	2.84157	2.45579			5.35667	3.47726	2.87634
5.36	2.84236	2.44847			5.36	3.47747	2.87273
5.36333	2.84201	2.45378			5.36333	3.47779	2.87283
5.36667	2.84474	2.45291			5.36667	3.47738	2.87095
5.37	2.84021	2.45306			5.37	3.47919	2.87176
5.37333	2.84245	2.45079			5.37333	3.47713	2.87075
5.37667	2.84478	2.45198			5.37667	3.47791	2.87028
5.38	2.84408	2.45337			5.38	3.47592	2.87118
5.38333	2.84325	2.45309			5.38333	3.47731	2.87446
5.38667	2.84229	2.45534			5.38667	3.47498	2.87537
5.39	2.84202	2.44789			5.39	3.47539	2.87476
5.39333	2.84372	2.45609			5.39333	3.47503	2.87907
5.39667	2.84223	2.45481			5.39667	3.47558	2.88066
5.4	2.84382	2.45063			5.4	3.47439	2.87889
5.40333	2.84416	2.45326			5.40333	3.4736	2.87713
5.40667	2.84368	2.45358			5.40667	3.47475	2.87787
5.41	2.84859	2.45075			5.41	3.47571	2.87472
5.41333	2.85104	2.45317			5.41333	3.47571	2.87259
5.41667	2.84191	2.45594			5.41667	3.47722	2.87297
5.42	2.84237	2.45734			5.42	3.47823	2.8724
5.42333	2.84783	2.45053			5.42333	3.47688	2.87375
5.42667	2.84249	2.45504			5.42667	3.47688	2.87667
5.43	2.84744	2.45088			5.43	3.47813	2.87759
5.43333	2.84722	2.45357			5.43333	3.47579	2.87713
5.43667	2.84393	2.45379			5.43667	3.47819	2.87905
5.44	2.84766	2.45132			5.44	3.48039	2.88257
5.44333	2.84595	2.4541			5.44333	3.48173	2.88189
5.44667	2.84389	2.45755			5.44667	3.482	2.88342
5.45	2.84274	2.45354			5.45	3.48501	2.88351
5.45333	2.84312	2.4496			5.45333	3.48447	2.88126
5.45667	2.84242	2.45103			5.45667	3.48624	2.879
5.46	2.84539	2.45529			5.46	3.48341	2.8767
5.46333	2.84997	2.45581			5.46333	3.48265	2.87559
5.46667	2.84604	2.45495			5.46667	3.48223	2.87513
5.47	2.8487	2.45485			5.47	3.48224	2.87763
5.47333	2.84651	2.45204			5.47333	3.47999	2.87599
5.47667	2.84921	2.45467			5.47667	3.48214	2.87742
5.48	2.8447	2.45465			5.48	3.48144	2.87661
5.48333	2.85043	2.45259			5.48333	3.48185	2.87722
5.48667	2.84644	2.4541			5.48667	3.48239	2.87642
5.49	2.84852	2.4553			5.49	3.48374	2.87749
5.49333	2.84693	2.45434			5.49333	3.48266	2.87936
5.49667	2.84827	2.4559			5.49667	3.48459	2.88064
5.5	2.84513	2.45656			5.5	3.48244	2.87852
5.50333	2.84493	2.45645			5.50333	3.48203	2.87754
5.50667	2.85203	2.4599			5.50667	3.48061	2.87758
5.51	2.84867	2.45287			5.51	3.48114	2.87546
5.51333	2.84891	2.45413			5.51333	3.47797	2.87675
5.51667	2.84536	2.45628			5.51667	3.47874	2.87841
5.52	2.85298	2.45693			5.52	3.479	2.88074
5.52333	2.85183	2.45286			5.52333	3.4794	2.88137
5.52667	2.84956	2.45619			5.52667	3.47621	2.88219
5.53	2.84918	2.45302			5.53	3.47747	2.88032
5.53333	2.85313	2.45623			5.53333	3.47763	2.8801
5.53667	2.85344	2.4587			5.53667	3.47652	2.87907
5.54	2.84742	2.45624			5.54	3.47687	2.87769
5.54333	2.85378	2.45894			5.54333	3.47771	2.87594
5.54667	2.85363	2.45516			5.54667	3.47629	2.87725
5.55	2.84981	2.45604			5.55	3.47734	2.87706
5.55333	2.85337	2.45613			5.55333	3.47809	2.87512
5.55667	2.8532	2.45771			5.55667	3.47884	2.8768
5.56	2.84674	2.45848			5.56	3.47808	2.88021
5.56333	2.85004	2.45637			5.56333	3.48144	2.88174
5.56667	2.85127	2.45707			5.56667	3.48065	2.88366
5.57	2.85085	2.45666			5.57	3.47978	2.88564
5.57333	2.85173	2.45644			5.57333	3.47989	2.88368
5.57667	2.85108	2.45603			5.57667	3.48138	2.88165
5.58	2.85541	2.45718			5.58	3.48019	2.87791
5.58333	2.85121	2.46055			5.58333	3.48118	2.87737
5.58667	2.85559	2.45872			5.58667	3.48179	2.87973
5.59	2.84753	2.4579			5.59	3.48056	2.88277
5.59333	2.85286	2.45581			5.59333	3.48279	2.88495
5.59667	2.85475	2.45669			5.59667	3.4832	2.8884
5.6	2.85338	2.45556			5.6	3.48138	2.88815
5.60333	2.85247	2.45792			5.60333	3.48141	2.88515
5.60667	2.85392	2.4531			5.60667	3.48205	2.88408
5.61	2.84978	2.45871			5.61	3.48192	2.8826
5.61333	2.85219	2.4568			5.61333	3.48338	2.88042
5.61667	2.85543	2.4546			5.61667	3.48483	2.88093
5.62	2.85167	2.45881			5.62	3.48595	2.88217
5.62333	2.85134	2.45856			5.62333	3.4869	2.88001
5.62667	2.85266	2.45514			5.62667	3.48799	2.87914
5.63	2.85336	2.45809			5.63	3.4884	2.87865
5.63333	2.85251	2.45755			5.63333	3.48966	2.87902
5.63667	2.84916	2.45915			5.63667	3.48944	2.87695
5.64	2.85483	2.46429			5.64	3.48967	2.87866
5.64333	2.8522	2.45861			5.64333	3.48825	2.87801
5.64667	2.85971	2.45756			5.64667	3.48759	2.87871
5.65	2.85312	2.46052			5.65	3.48853	2.8807
5.65333	2.85927	2.45486			5.65333	3.4889	2.88537
5.65667	2.85572	2.46265			5.65667	3.48934	2.88758
5.66	2.85555	2.46017			5.66	3.49081	2.89089
5.66333	2.85073	2.45366			5.66333	3.49168	2.89301
5.66667	2.85519	2.45985			5.66667	3.4918	2.89112
5.67	2.85579	2.45849			5.67	3.49265	2.88922
5.67333	2.85409	2.45514			5.67333	3.49202	2.88829
5.67667	2.85198	2.45495			5.67667	3.49252	2.88705
5.68	2.85885	2.45932			5.68	3.49198	2.88577
5.68333	2.85404	2.4637			5.68333	3.49221	2.88739
5.68667	2.85905	2.46008			5.68667	3.4922	2.88808
5.69	2.85757	2.45949			5.69	3.49267	2.8884
5.69333	2.85307	2.46045			5.69333	3.49158	2.88873
5.69667	2.85727	2.45645			5.69667	3.4923	2.88949
5.7	2.85712	2.46129			5.7	3.49242	2.88915
5.70333	2.86312	2.45985			5.70333	3.4934	2.8897
5.70667	2.8548	2.4599			5.70667	3.49327	2.88771
5.71	2.85715	2.45989			5.71	3.49335	2.88601
5.71333	2.86112	2.4587			5.71333	3.49205	2.88629
5.71667	2.86059	2.46064			5.71667	3.49084	2.88567
5.72	2.85734	2.45599			5.72	3.48951	2.88329
5.72333	2.85846	2.45883			5.72333	3.4909	2.8827
5.72667	2.85668	2.46209			5.72667	3.4912	2.88613
5.73	2.85916	2.4606			5.73	3.49315	2.88626
5.73333	2.85601	2.45781			5.73333	3.49334	2.88581
5.73667	2.85643	2.4615			5.73667	3.49407	2.88768
5.74	2.85822	2.45703			5.74	3.49207	2.89142
5.74333	2.86184	2.45805			5.74333	3.49204	2.88922
5.74667	2.86268	2.45327			5.74667	3.49156	2.88761
5.75	2.8588	2.46111			5.75	3.49119	2.88604
5.75333	2.86282	2.46173			5.75333	3.49028	2.88649
5.75667	2.85578	2.45553			5.75667	3.4899	2.88471
5.76	2.85869	2.45883			5.76	3.49196	2.88511
5.76333	2.86353	2.46029			5.76333	3.49202	2.88622
5.76667	2.85903	2.46031			5.76667	3.49397	2.88795
5.77	2.863	2.46054			5.77	3.49574	2.88567
5.77333	2.86404	2.46338			5.77333	3.49796	2.88588
5.77667	2.86087	2.46615			5.77667	3.49861	2.88853
5.78	2.85632	2.45571			5.78	3.4989	2.88867
5.78333	2.8601	2.45699			5.78333	3.49734	2.89031
5.78667	2.85824	2.45784			5.78667	3.49607	2.89269
5.79	2.85972	2.46171			5.79	3.49612	2.89586
5.79333	2.85981	2.46211			5.79333	3.4935	2.8927
5.79667	2.85907	2.46067			5.79667	3.49461	2.89317
5.8	2.86276	2.45973			5.8	3.4944	2.8917
5.80333	2.85916	2.46197			5.80333	3.49459	2.88902
5.80667	2.8648	2.46			5.80667	3.49362	2.88549
5.81	2.86094	2.45978			5.81	3.49489	2.88486
5.81333	2.86611	2.46431			5.81333	3.49361	2.88363
5.81667	2.86178	2.45842			5.81667	3.49559	2.88229
5.82	2.85949	2.45996			5.82	3.49514	2.88346
5.82333	2.86523	2.4634			5.82333	3.49419	2.88612
5.82667	2.86372	2.4627			5.82667	3.49334	2.88797
5.83	2.8587	2.46058			5.83	3.49328	2.8882
5.83333	2.86221	2.46283			5.83333	3.4907	2.88966
5.83667	2.86254	2.46089			5.83667	3.49103	2.89048
5.84	2.86375	2.46058			5.84	3.49121	2.88764
5.84333	2.86365	2.46163			5.84333	3.49033	2.88666
5.84667	2.86056	2.45591			5.84667	3.48899	2.88818
5.85	2.86598	2.46339			5.85	3.48931	2.88981
5.85333	2.86615	2.46052			5.85333	3.48914	2.89222
5.85667	2.86698	2.46051			5.85667	3.49088	2.8943
5.86	2.86505	2.46309			5.86	3.48967	2.89443
5.86333	2.86071	2.45929			5.86333	3.49147	2.89489
5.86667	2.86376	2.46345			5.86667	3.49159	2.89392
5.87	2.86957	2.45937			5.87	3.49284	2.89116
5.87333	2.86517	2.45938			5.87333	3.49253	2.89104
5.87667	2.86211	2.46246			5.87667	3.49473	2.89301
5.88	2.86354	2.45691			5.88	3.49203	2.89354
5.88333	2.86494	2.46263			5.88333	3.49173	2.89314
5.88667	2.86458	2.46658			5.88667	3.49079	2.8956
5.89	2.87022	2.46337			5.89	3.49069	2.89579
5.89333	2.86663	2.46109			5.89333	3.49212	2.89644
5.89667	2.86423	2.45987			5.89667	3.49413	2.89838
5.9	2.86438	2.4613			5.9	3.4957	2.90064
5.90333	2.86406	2.46032			5.90333	3.49513	2.90077
5.90667	2.86876	2.46445			5.90667	3.49503	2.90151
5.91	2.868	2.4639			5.91	3.49615	2.89964
5.91333	2.86563	2.46116			5.91333	3.49662	2.8975
5.91667	2.86927	2.46226			5.91667	3.49702	2.89536
5.92	2.86504	2.46335			5.92	3.49661	2.89276
5.92333	2.86544	2.46042			5.92333	3.4969	2.89422
5.92667	2.86868	2.4656			5.92667	3.49746	2.89569
5.93	2.87235	2.46504			5.93	3.49727	2.89565
5.93333	2.86921	2.4632			5.93333	3.49809	2.89552
5.93667	2.87083	2.4646			5.93667	3.50153	2.89404
5.94	2.87128	2.46333			5.94	3.50145	2.8935
5.94333	2.86537	2.4676			5.94333	3.50091	2.89348
5.94667	2.86714	2.46404			5.94667	3.50196	2.89228
5.95	2.87002	2.46562			5.95	3.50221	2.89369
5.95333	2.86793	2.4587			5.95333	3.50084	2.89713
5.95667	2.86961	2.46356			5.95667	3.50239	2.89518
5.96	2.86594	2.4621			5.96	3.50247	2.89461
5.96333	2.87354	2.45985			5.96333	3.50367	2.89677
5.96667	2.86646	2.46738			5.96667	3.50339	2.89799
5.97	2.86807	2.46435			5.97	3.50589	2.8969
5.97333	2.86812	2.46307			5.97333	3.5051	2.899
5.97667	2.87024	2.46306			5.97667	3.5043	2.90176
5.98	2.8679	2.46262			5.98	3.5038	2.90137
5.98333	2.86842	2.45867			5.98333	3.50508	2.90087
5.98667	2.87167	2.46151			5.98667	3.50327	2.90047
5.99	2.87005	2.46509			5.99	3.5036	2.89881
5.99333	2.87059	2.46432			5.99333	3.50403	2.89433
5.99667	2.8713	2.46562			5.99667	3.50359	2.89159
6	2.87058	2.46478			6	3.50276	2.89174
6.00333	2.86954	2.46481			6.00333	3.5039	2.89243
6.00667	2.86769	2.46176			6.00667	3.50343	2.89094
6.01	2.86837	2.46746			6.01	3.50404	2.89565
6.01333	2.86889	2.46456			6.01333	3.50573	2.89778
6.01667	2.87493	2.46636			6.01667	3.50639	2.89573
6.02	2.87182	2.46892			6.02	3.50669	2.89558
6.02333	2.87134	2.46202			6.02333	3.50778	2.89738
6.02667	2.87361	2.46296			6.02667	3.50729	2.89548
6.03	2.87403	2.46418			6.03	3.50609	2.89728
6.03333	2.87501	2.46815			6.03333	3.50516	2.89746
6.03667	2.87401	2.4664			6.03667	3.50599	2.90122
6.04	2.87119	2.46399			6.04	3.5056	2.90374
6.04333	2.87255	2.46457			6.04333	3.50527	2.90486
6.04667	2.87254	2.46624			6.04667	3.50527	2.90417
6.05	2.87148	2.46711			6.05	3.50464	2.90654
6.05333	2.87252	2.46291			6.05333	3.50294	2.90436
6.05667	2.87608	2.4692			6.05667	3.50295	2.90156
6.06	2.87386	2.46629			6.06	3.50292	2.89997
6.06333	2.8708	2.46827			6.06333	3.50298	2.89946
6.06667	2.87175	2.46439			6.06667	3.50399	2.89754
6.07	2.87509	2.46713			6.07	3.50406	2.89851
6.07333	2.86883	2.4617			6.07333	3.50365	2.89907
6.07667	2.87652	2.46646			6.07667	3.50453	2.90075
6.08	2.87179	2.46448			6.08	3.50662	2.8984
6.08333	2.87591	2.46181			6.08333	3.50772	2.90051
6.08667	2.87625	2.46706			6.08667	3.50878	2.90137
6.09	2.87405	2.45963			6.09	3.51065	2.90036
6.09333	2.87601	2.46391			6.09333	3.51012	2.89951
6.09667	2.87371	2.466			6.09667	3.51079	2.90139
6.1	2.87744	2.46714			6.1	3.51013	2.90081
6.10333	2.87465	2.46585			6.10333	3.51062	2.90064
6.10667	2.87268	2.46543			6.10667	3.51014	2.90205
6.11	2.87299	2.46711			6.11	3.5096	2.90454
6.11333	2.87078	2.4679			6.11333	3.50748	2.90493
6.11667	2.86993	2.464			6.11667	3.50803	2.90622
6.12	2.8761	2.46569			6.12	3.50705	2.90535
6.12333	2.8711	2.46635			6.12333	3.50787	2.90682
6.12667	2.87519	2.46272			6.12667	3.5064	2.90517
6.13	2.87582	2.46628			6.13	3.50676	2.9057
6.13333	2.87606	2.46358			6.13333	3.50528	2.90554
6.13667	2.8752	2.46318			6.13667	3.50654	2.90582
6.14	2.87812	2.464			6.14	3.50561	2.90339
6.14333	2.87193	2.4693			6.14333	3.50824	2.90277
6.14667	2.87687	2.4646			6.14667	3.5057	2.90235
6.15	2.8794	2.46533			6.15	3.50686	2.90046
6.15333	2.87442	2.46834			6.15333	3.50639	2.89887
6.15667	2.87527	2.46527			6.15667	3.50482	2.89953
6.16	2.8753	2.47008			6.16	3.5043	2.89857
6.16333	2.87914	2.46919			6.16333	3.50628	2.89926
6.16667	2.87697	2.4693			6.16667	3.50429	2.90074
6.17	2.87779	2.46674			6.17	3.50426	2.90277
6.17333	2.87145	2.4683			6.17333	3.50613	2.90291
6.17667	2.87519	2.46841			6.17667	3.5058	2.90517
6.18	2.87369	2.46323			6.18	3.50693	2.90598
6.18333	2.87483	2.46984			6.18333	3.50863	2.90677
6.18667	2.87664	2.46545			6.18667	3.50915	2.90667
6.19	2.87663	2.46922			6.19	3.50825	2.9089
6.19333	2.87979	2.46991			6.19333	3.50979	2.90744
6.19667	2.87887	2.46806			6.19667	3.5093	2.90542
6.2	2.88088	2.46779			6.2	3.5106	2.90592
6.20333	2.87816	2.46965			6.20333	3.51064	2.907
6.20667	2.87897	2.46718			6.20667	3.51223	2.90588
6.21	2.87517	2.46833			6.21	3.51148	2.9074
6.21333	2.87368	2.46877			6.21333	3.51249	2.90677
6.21667	2.87839	2.46245			6.21667	3.51178	2.90748
6.22	2.8754	2.46732			6.22	3.51087	2.90546
6.22333	2.87794	2.46782			6.22333	3.51149	2.90362
6.22667	2.88154	2.46598			6.22667	3.51091	2.90222
6.23	2.87224	2.4659			6.23	3.50733	2.90526
6.23333	2.88043	2.46355			6.23333	3.5061	2.90111
6.23667	2.88214	2.46814			6.23667	3.50685	2.90334
6.24	2.87823	2.46883			6.24	3.5045	2.90542
6.24333	2.87778	2.4661			6.24333	3.50692	2.9066
6.24667	2.87679	2.46842			6.24667	3.50751	2.90558
6.25	2.87385	2.46625			6.25	3.50825	2.90968
6.25333	2.87859	2.46918			6.25333	3.50701	2.90724
6.25667	2.8801	2.46658			6.25667	3.50926	2.90509
6.26	2.87684	2.46644			6.26	3.50702	2.90322
6.26333	2.8797	2.46548			6.26333	3.51099	2.90233
6.26667	2.8773	2.46745			6.26667	3.51117	2.90103
6.27	2.8792	2.4671			6.27	3.51158	2.89924
6.27333	2.88152	2.46503			6.27333	3.51097	2.90123
6.27667	2.88235	2.4681			6.27667	3.51337	2.90498
6.28	2.88152	2.46655			6.28	3.50976	2.90528
6.28333	2.87669	2.4685			6.28333	3.51143	2.90463
6.28667	2.87519	2.46795			6.28667	3.51353	2.9082
6.29	2.8804	2.46673			6.29	3.51547	2.9076
6.29333	2.87694	2.46833			6.29333	3.51496	2.90421
6.29667	2.87827	2.47054			6.29667	3.51703	2.90338
6.3	2.8829	2.46565			6.3	3.51694	2.90338
6.30333	2.87865	2.46568			6.30333	3.5174	2.90181
6.30667	2.88225	2.47171			6.30667	3.51735	2.90319
6.31	2.88025	2.47106			6.31	3.51795	2.90512
6.31333	2.87636	2.46475			6.31333	3.51826	2.90877
6.31667	2.88474	2.46672			6.31667	3.51926	2.90946
6.32	2.88009	2.46641			6.32	3.51901	2.91067
6.32333	2.8867	2.46714			6.32333	3.51993	2.91213
6.32667	2.88114	2.46466			6.32667	3.51802	2.91244
6.33	2.88395	2.47186			6.33	3.51987	2.91187
6.33333	2.87888	2.4669			6.33333	3.51806	2.91355
6.33667	2.88172	2.46651			6.33667	3.51765	2.91418
6.34	2.87827	2.46872			6.34	3.51608	2.91175
6.34333	2.87756	2.4668			6.34333	3.51846	2.90987
6.34667	2.88679	2.46761			6.34667	3.51669	2.9108
6.35	2.882	2.46927			6.35	3.5177	2.90803
6.35333	2.88294	2.46729			6.35333	3.51715	2.9079
6.35667	2.88025	2.46833			6.35667	3.51684	2.91133
6.36	2.88464	2.46718			6.36	3.51701	2.91275
6.36333	2.88067	2.46738			6.36333	3.51805	2.91259
6.36667	2.88081	2.46518			6.36667	3.5195	2.9118
6.37	2.8821	2.47016			6.37	3.52085	2.90762
6.37333	2.88133	2.46996			6.37333	3.52205	2.90388
6.37667	2.88111	2.46952			6.37667	3.52106	2.90434
6.38	2.88356	2.46984			6.38	3.52188	2.90185
6.38333	2.88017	2.46553			6.38333	3.52259	2.90439
6.38667	2.88341	2.46863			6.38667	3.5212	2.9074
6.39	2.89093	2.46802			6.39	3.52148	2.90804
6.39333	2.88212	2.4694			6.39333	3.52228	2.908
6.39667	2.87987	2.46821			6.39667	3.52257	2.91055
6.4	2.88181	2.46471			6.4	3.52177	2.9099
6.40333	2.88549	2.46855			6.40333	3.52327	2.91308
6.40667	2.88615	2.46916			6.40667	3.52261	2.91534
6.41	2.87889	2.47193			6.41	3.52225	2.91387
6.41333	2.88477	2.46897			6.41333	3.52151	2.91272
6.41667	2.88108	2.46759			6.41667	3.52088	2.91362
6.42	2.88446	2.47166			6.42	3.52008	2.91042
6.42333	2.88563	2.46703			6.42333	3.52115	2.90938
6.42667	2.88526	2.4715			6.42667	3.5215	2.91182
6.43	2.8798	2.47027			6.43	3.52167	2.91322
6.43333	2.88434	2.46606			6.43333	3.52123	2.9123
6.43667	2.88313	2.46953			6.43667	3.5241	2.91494
6.44	2.88607	2.46579			6.44	3.52253	2.91485
6.44333	2.88145	2.46972			6.44333	3.52245	2.91367
6.44667	2.88077	2.46744			6.44667	3.52138	2.91247
6.45	2.88631	2.46434			6.45	3.52095	2.91272
6.45333	2.88876	2.46835			6.45333	3.51764	2.90954
6.45667	2.88532	2.46597			6.45667	3.51848	2.90975
6.46	2.88573	2.46795			6.46	3.51718	2.91121
6.46333	2.88176	2.46596			6.46333	3.51754	2.91288
6.46667	2.88321	2.46959			6.46667	3.51698	2.90997
6.47	2.8887	2.46584			6.47	3.52031	2.91211
6.47333	2.88447	2.46874			6.47333	3.51861	2.91277
6.47667	2.89025	2.46665			6.47667	3.52077	2.91274
6.48	2.88297	2.46856			6.48	3.51997	2.91234
6.48333	2.88721	2.4679			6.48333	3.52254	2.91548
6.48667	2.88465	2.47038			6.48667	3.51922	2.91405
6.49	2.88325	2.47228			6.49	3.52246	2.91203
6.49333	2.88534	2.46721			6.49333	3.52207	2.91
6.49667	2.89212	2.47051			6.49667	3.52309	2.91
6.5	2.88736	2.47119			6.5	3.52139	2.91277
6.50333	2.88773	2.47057			6.50333	3.52265	2.91482
6.50667	2.88467	2.47267			6.50667	3.52213	2.91772
6.51	2.88628	2.46753			6.51	3.52204	2.92124
6.51333	2.88726	2.46876			6.51333	3.52331	2.9197
6.51667	2.88869	2.46964			6.51667	3.52445	2.91887
6.52	2.88834	2.47139			6.52	3.52567	2.91746
6.52333	2.8863	2.46865			6.52333	3.52639	2.91573
6.52667	2.88793	2.4694			6.52667	3.526	2.9161
6.53	2.8836	2.46734			6.53	3.52737	2.91754
6.53333	2.88662	2.46738			6.53333	3.52742	2.91468
6.53667	2.88759	2.46848			6.53667	3.5274	2.91468
6.54	2.88892	2.47197			6.54	3.5272	2.91391
6.54333	2.88958	2.46945			6.54333	3.52809	2.91148
6.54667	2.88878	2.46665			6.54667	3.52454	2.91103
6.55	2.88634	2.46863			6.55	3.52431	2.91255
6.55333	2.88593	2.46785			6.55333	3.522	2.91519
6.55667	2.89086	2.47166			6.55667	3.5206	2.91663
6.56	2.88821	2.46793			6.56	3.51997	2.91629
6.56333	2.88395	2.47271			6.56333	3.52089	2.91549
6.56667	2.88887	2.47002			6.56667	3.52031	2.91448
6.57	2.88746	2.4682			6.57	3.52218	2.91244
6.57333	2.88776	2.47275			6.57333	3.5223	2.90969
6.57667	2.88688	2.46914			6.57667	3.52394	2.91091
6.58	2.89212	2.46747			6.58	3.52499	2.91221
6.58333	2.88815	2.46952			6.58333	3.52586	2.91219
6.58667	2.88997	2.47215			6.58667	3.52534	2.91151
6.59	2.88639	2.46493			6.59	3.52688	2.91382
6.59333	2.88855	2.47556			6.59333	3.5253	2.91271
6.59667	2.89171	2.46806			6.59667	3.5244	2.91318
6.6	2.88957	2.474			6.6	3.52388	2.9145
6.60333	2.8897	2.47021			6.60333	3.52378	2.91531
6.60667	2.88643	2.46886			6.60667	3.52219	2.9178
6.61	2.89044	2.47007			6.61	3.52433	2.91996
6.61333	2.88968	2.46652			6.61333	3.52289	2.91856
6.61667	2.88959	2.47021			6.61667	3.52171	2.92073
6.62	2.88841	2.46883			6.62	3.52125	2.92173
6.62333	2.8894	2.46984			6.62333	3.52171	2.91994
6.62667	2.88872	2.47273			6.62667	3.51997	2.91763
6.63	2.89166	2.47216			6.63	3.52332	2.91834
6.63333	2.89296	2.47217			6.63333	3.52623	2.91917
6.63667	2.89036	2.4689			6.63667	3.52743	2.91821
6.64	2.88618	2.4728			6.64	3.5269	2.91793
6.64333	2.89154	2.46977			6.64333	3.52797	2.91964
6.64667	2.89227	2.46813			6.64667	3.52982	2.91925
6.65	2.89299	2.47312			6.65	3.52881	2.91449
6.65333	2.89303	2.4758			6.65333	3.52834	2.91397
6.65667	2.88725	2.47089			6.65667	3.53012	2.91374
[truncated: 22,303 more rows]
