# Supplementary material for: Early steps of protein disaggregation by Hsp70 chaperone and class B J-domain proteins are shaped by Hsp110
Source: eLife. 2024 Oct 15;13:RP94795. doi: 10.7554/eLife.94795 (PMC11479587; doi:10.7554/eLife.94795)
Supplement: Figure 1—figure supplement 2—source data 1. [file elife-94795-fig1-figsupp2-data1.xlsx]

## Sheet: Figure 1—figure supplement 2A
	Ssa1, Sis1	Ssa1, Sis1, Sse1	Ssa1	Ssa1, Ydj1	Ssa1, Ydj1, Sse1			Fluorescence
0	0	0	0	0	0				Ssa1			Ssa1, Sis1			Ssa1, Sis1, Sse1			Ydj1, Ssa1			Ydj1, Ssa1, Sse1
0.003333	-0.00052	0.004117	-0.00354	0.005983	-0.00462				107874	49488	98412	185232	194061	227147	295171	302115	292699	167212	161959	153618	113320	150753	135827
0.006667	0.000134	0.010241	-0.00716	0.006077	-0.00347
0.01	0.000151	0.010115	-0.00678	0.008427	-0.00126
0.013333	-0.0012	0.01243	-0.00753	0.010829	-0.00121
0.016667	-0.00306	0.012656	-0.00818	0.011476	-0.00152
0.02	-0.00458	0.012478	-0.00769	0.011516	-0.00062
0.023333	-0.00439	0.006615	-0.0137	0.012919	-0.00157
0.026667	-0.00565	0.007916	-0.01779	0.012089	-0.00309
0.03	-0.00695	0.004853	-0.01937	0.013047	-0.00252
0.033333	-0.00689	0.002656	-0.02227	0.013669	-0.0034
0.036667	-0.00325	-0.00018	-0.02567	0.012897	-0.00403
0.04	-0.00296	0.001485	-0.02725	0.012988	-0.00416
0.043333	-0.00202	0.001491	-0.02576	0.012892	-0.00482
0.046667	-0.00261	0.001868	-0.02901	0.010534	-0.00424
0.05	-0.0032	0.004247	-0.02864	0.010905	-0.00425
0.053333	-0.00675	0.004971	-0.03189	0.013108	-0.00307
0.056667	-0.00686	0.006837	-0.02812	0.011713	-0.00232
0.06	-0.00468	0.005464	-0.03185	0.01152	-0.0028
0.063333	-0.00366	0.00729	-0.03481	0.010447	-0.00335
0.066667	-0.00545	0.004026	-0.03709	0.00914	-0.00267
0.07	-0.00043	0.004128	-0.03614	0.008215	-0.00374
0.073333	-0.00496	0.004006	-0.03887	0.007822	-0.00366
0.076667	-0.00636	0.004101	-0.03738	0.00908	-0.00101
0.08	-0.00801	0.000602	-0.03627	0.010895	-0.00013
0.083333	-0.00358	0.000602	-0.03865	0.011045	0.001784
0.086667	-0.0072	0.001424	-0.04044	0.01023	0.003532
0.09	-0.00423	0.00184	-0.04144	0.011259	0.005819
0.093333	-0.00654	0.001238	-0.0475	0.012384	0.003839
0.096667	-0.00166	0.000274	-0.05009	0.012429	0.003822
0.1	-0.00212	0.000444	-0.04691	0.013226	0.003308
0.103333	-0.00393	0.000727	-0.04535	0.015047	0.00362
0.106667	-0.00502	0.000537	-0.04496	0.01533	0.001759
0.11	-0.00437	-0.00146	-0.0427	0.014555	0.004079
0.113333	-0.00975	2.56e-05	-0.04074	0.013558	0.003731
0.116667	-0.01238	0.003163	-0.04651	0.015002	0.004718
0.12	-0.00968	0.002919	-0.04626	0.013288	0.006238
0.123333	-0.00811	0.001438	-0.04734	0.013288	0.005879
0.126667	-0.00531	0.001911	-0.04596	0.013046	0.005896
0.13	-0.00506	0.002242	-0.04435	0.012189	0.005139
0.133333	-0.00255	0.000907	-0.04204	0.011048	0.007057
0.136667	-0.00181	0.000794	-0.04273	0.011157	0.005946
0.14	-0.00385	-0.00121	-0.04425	0.011131	0.007883
0.143333	-0.00615	-0.002	-0.04578	0.012271	0.00874
0.146667	-0.0026	0.001276	-0.04961	0.013838	0.011381
0.15	-0.00415	0.002063	-0.04631	0.013739	0.010648
0.153333	-0.00563	0.002516	-0.05003	0.013271	0.012818
0.156667	-0.00517	0.004047	-0.04719	0.012872	0.013071
0.16	-0.00502	0.004251	-0.04575	0.010677	0.011972
0.163333	-0.00454	0.002383	-0.04506	0.010118	0.011134
0.166667	-0.00492	0.001688	-0.05048	0.009012	0.010178
0.17	-0.00667	-9.1e-06	-0.04819	0.010674	0.009737
0.173333	-0.00727	-0.00107	-0.0462	0.010627	0.00896
0.176667	-0.00634	-0.00043	-0.05055	0.012431	0.00907
0.18	-0.00797	-3.2e-05	-0.04795	0.013268	0.009908
0.183333	-0.00691	-0.0018	-0.04764	0.014382	0.011923
0.186667	-0.00613	-0.0032	-0.05062	0.012351	0.011112
0.19	-0.00479	-0.00266	-0.05582	0.012126	0.013485
0.193333	-0.00478	-0.00072	-0.05016	0.010681	0.015859
0.196667	-0.00559	-0.00341	-0.0543	0.009335	0.017123
0.2	-0.00436	-0.00416	-0.05116	0.00931	0.016903
0.203333	-0.00441	-0.00453	-0.04991	0.008606	0.017891
0.206667	-0.00497	-0.0032	-0.05001	0.009881	0.017696
0.21	-0.00523	-0.00478	-0.05421	0.011771	0.018464
0.213333	-0.00416	-0.00491	-0.05258	0.013225	0.017736
0.216667	-0.00543	-0.00351	-0.05176	0.011429	0.016912
0.22	-0.00628	-0.00343	-0.0495	0.0127	0.018714
0.223333	-0.00682	-0.00692	-0.0497	0.012259	0.017981
0.226667	-0.00752	-0.00606	-0.05096	0.010208	0.01626
0.23	-0.00734	-0.00829	-0.04774	0.009183	0.017252
0.233333	-0.00686	-0.01069	-0.05198	0.012625	0.018073
0.236667	-0.00761	-0.01012	-0.05088	0.011566	0.01607
0.24	-0.0065	-0.01034	-0.04744	0.008842	0.016736
0.243333	-0.00726	-0.01218	-0.04523	0.007896	0.016891
0.246667	-0.00735	-0.00715	-0.04698	0.008737	0.014782
0.25	-0.0081	-0.00709	-0.04672	0.004883	0.01409
0.253333	-0.00739	-0.00489	-0.05058	0.006835	0.015632
0.256667	-0.00967	-0.00352	-0.0542	0.007464	0.017469
0.26	-0.01158	-0.00316	-0.05588	0.010296	0.019343
0.263333	-0.01116	-0.00657	-0.05809	0.008029	0.020772
0.266667	-0.0125	-0.00638	-0.0577	0.010074	0.023084
0.27	-0.01264	-0.00764	-0.05693	0.010805	0.022554
0.273333	-0.01371	-0.00833	-0.05589	0.011256	0.020509
0.276667	-0.01231	-0.01072	-0.05691	0.007742	0.017866
0.28	-0.01607	-0.0111	-0.05431	0.007747	0.018133
0.283333	-0.01631	-0.01084	-0.0537	0.006791	0.01716
0.286667	-0.01552	-0.0108	-0.05475	0.003044	0.017001
0.29	-0.01307	-0.00988	-0.05597	0.002606	0.017198
0.293333	-0.01442	-0.00869	-0.05247	0.000174	0.018141
0.296667	-0.01094	-0.00783	-0.057	0.002235	0.017637
0.3	-0.00892	-0.00667	-0.0611	0.001898	0.015318
0.303333	-0.00761	-0.01034	-0.06047	0.004733	0.013664
0.306667	-0.00627	-0.01039	-0.06054	0.006349	0.0162
0.31	-0.00389	-0.00789	-0.06541	0.009902	0.018023
0.313333	-0.00394	-0.00765	-0.06415	0.008085	0.019327
0.316667	-0.00299	-0.00643	-0.06224	0.007212	0.021964
0.32	-0.00373	-0.0027	-0.06496	0.005164	0.022969
0.323333	-0.00406	-0.0039	-0.0682	0.00543	0.01948
0.326667	-0.00516	-0.00693	-0.06867	0.004288	0.016072
0.33	-0.00466	-0.00677	-0.07204	0.005125	0.015943
0.333333	-0.00461	-0.01229	-0.07449	0.007614	0.016226
0.336667	-0.00617	-0.01268	-0.07715	0.007297	0.014043
0.34	-0.00774	-0.01033	-0.07716	0.007652	0.016452
0.343333	-0.00847	-0.01072	-0.07832	0.008537	0.019141
0.346667	-0.00866	-0.01015	-0.07903	0.008418	0.016787
0.35	-0.01106	-0.00596	-0.08289	0.007094	0.015897
0.353333	-0.01374	-0.00603	-0.08507	0.006155	0.019383
0.356667	-0.01219	-0.00842	-0.08739	0.003146	0.019467
0.36	-0.01029	-0.0066	-0.08766	0.003622	0.019569
0.363333	-0.0112	-0.00771	-0.09145	0.003696	0.021538
0.366667	-0.00945	-0.0074	-0.09297	0.004115	0.021062
0.37	-0.00666	-0.00981	-0.09313	0.004333	0.019304
0.373333	-0.00681	-0.00959	-0.09369	0.006102	0.017654
0.376667	-0.00803	-0.0102	-0.097	0.004448	0.01756
0.38	-0.00989	-0.01076	-0.09836	0.004341	0.017401
0.383333	-0.01007	-0.01269	-0.10002	0.003978	0.016342
0.386667	-0.00968	-0.01214	-0.10317	0.005295	0.017418
0.39	-0.01066	-0.01216	-0.10876	0.004861	0.017246
0.393333	-0.01287	-0.01135	-0.11406	0.003901	0.017547
0.396667	-0.01244	-0.0111	-0.11743	0.003755	0.016299
0.4	-0.01465	-0.0124	-0.11968	0.004124	0.016675
0.403333	-0.01748	-0.0136	-0.12363	0.00353	0.015016
0.406667	-0.01617	-0.0139	-0.12343	0.000979	0.016512
0.41	-0.01396	-0.01328	-0.12351	0.004151	0.015736
0.413333	-0.01295	-0.01287	-0.12487	0.003598	0.015621
0.416667	-0.01242	-0.01044	-0.12788	0.002536	0.014404
0.42	-0.01034	-0.00987	-0.12845	0.004254	0.015137
0.423333	-0.01125	-0.01116	-0.1301	0.007623	0.01363
0.426667	-0.01326	-0.01061	-0.13454	0.005097	0.012747
0.43	-0.01349	-0.01207	-0.13899	0.00352	0.012416
0.433333	-0.0135	-0.01199	-0.13665	0.00328	0.012921
0.436667	-0.01324	-0.01191	-0.13619	0.000833	0.013464
0.44	-0.01246	-0.00966	-0.141	0.001303	0.013246
0.443333	-0.01099	-0.01178	-0.13899	0.003145	0.01213
0.446667	-0.00981	-0.01238	-0.13793	0.003704	0.013982
0.45	-0.00972	-0.01641	-0.14073	0.003919	0.014964
0.453333	-0.01175	-0.01596	-0.14128	0.003607	0.01447
0.456667	-0.01283	-0.01751	-0.13965	0.000753	0.015744
0.46	-0.01431	-0.01968	-0.14224	0.000843	0.015644
0.463333	-0.01595	-0.01973	-0.13843	-0.00034	0.013902
0.466667	-0.01443	-0.0173	-0.13771	-0.00114	0.014378
0.47	-0.01412	-0.01878	-0.1405	-0.00213	0.013427
0.473333	-0.01466	-0.01928	-0.14087	0.000751	0.012593
0.476667	-0.01345	-0.01836	-0.13955	-0.00155	0.01477
0.48	-0.01453	-0.01624	-0.14439	-0.00213	0.01502
0.483333	-0.01749	-0.01625	-0.14676	-0.00246	0.014833
0.486667	-0.01811	-0.01223	-0.14642	-6e-05	0.015686
0.49	-0.01952	-0.01108	-0.14543	-0.00178	0.014263
0.493333	-0.01902	-0.01078	-0.14623	-0.00201	0.013117
0.496667	-0.0162	-0.01159	-0.14649	0.000981	0.014953
0.5	0.174379	0.069523	-0.11953	-0.02335	0.083061
0.503333	0.176236	0.073989	-0.13043	0.01603	0.1187
0.506667	0.194026	0.072499	-0.13392	0.048903	0.132934
0.51	0.205694	0.084289	-0.14307	0.071313	0.15673
0.513333	0.212776	0.08711	-0.13189	0.094834	0.169032
0.516667	0.218644	0.090165	-0.13556	0.124744	0.188717
0.52	0.225344	0.094048	-0.13593	0.142868	0.207225
0.523333	0.225682	0.096662	-0.13516	0.157905	0.222002
0.526667	0.224291	0.097755	-0.13254	0.173189	0.234941
0.53	0.223371	0.099988	-0.13548	0.18394	0.247155
0.533333	0.222468	0.102083	-0.13096	0.191856	0.262061
0.536667	0.222496	0.102744	-0.13063	0.203522	0.268551
0.54	0.222956	0.106333	-0.12597	0.213103	0.276575
0.543333	0.218833	0.106504	-0.1268	0.222904	0.287447
0.546667	0.218379	0.107251	-0.12627	0.232606	0.296418
0.55	0.219108	0.10716	-0.13191	0.242252	0.302766
0.553333	0.219691	0.111198	-0.13364	0.25175	0.312445
0.556667	0.219009	0.110838	-0.14074	0.262687	0.322207
0.56	0.227551	0.113959	-0.14186	0.271112	0.328379
0.563333	0.22748	0.116864	-0.14383	0.279754	0.338269
0.566667	0.22865	0.118088	-0.14495	0.287153	0.345357
0.57	0.227056	0.115508	-0.14503	0.293747	0.353222
0.573333	0.229083	0.116751	-0.14495	0.299289	0.360741
0.576667	0.231895	0.119087	-0.14735	0.305101	0.366081
0.58	0.232973	0.119001	-0.14848	0.309924	0.371472
0.583333	0.234832	0.120566	-0.1461	0.316642	0.378356
0.586667	0.239159	0.122321	-0.1456	0.322849	0.383515
0.59	0.238258	0.12461	-0.14519	0.329756	0.39007
0.593333	0.232826	0.121387	-0.14282	0.335388	0.398553
0.596667	0.234559	0.122147	-0.14021	0.342879	0.405488
0.6	0.234499	0.123258	-0.14216	0.346444	0.408136
0.603333	0.231652	0.125302	-0.14157	0.351528	0.416135
0.606667	0.23123	0.123896	-0.14361	0.35648	0.422819
0.61	0.237997	0.125725	-0.14413	0.362156	0.427045
0.613333	0.238722	0.12472	-0.14491	0.366881	0.431403
0.616667	0.237777	0.124637	-0.14476	0.373378	0.43905
0.62	0.238893	0.12567	-0.14445	0.377037	0.445915
0.623333	0.242978	0.125466	-0.14054	0.3817	0.449515
0.626667	0.239107	0.125112	-0.13862	0.385207	0.454798
0.63	0.240175	0.125841	-0.13862	0.389303	0.459026
0.633333	0.241122	0.127146	-0.13932	0.393665	0.464024
0.636667	0.242081	0.127056	-0.14187	0.399794	0.466711
0.64	0.239576	0.130054	-0.14138	0.403902	0.470188
0.643333	0.242042	0.130741	-0.14388	0.408884	0.476088
0.646667	0.241913	0.130364	-0.14355	0.412405	0.486085
0.65	0.242366	0.131741	-0.14527	0.41904	0.493691
0.653333	0.239526	0.131896	-0.14127	0.423518	0.499463
0.656667	0.241217	0.132953	-0.14374	0.427696	0.50607
0.66	0.238584	0.134836	-0.14316	0.432305	0.511147
0.663333	0.239893	0.137708	-0.14526	0.437305	0.514258
0.666667	0.242085	0.135765	-0.14283	0.439756	0.520164
0.67	0.244662	0.137915	-0.14525	0.442131	0.530175
0.673333	0.244963	0.137656	-0.14211	0.447564	0.53833
0.676667	0.24876	0.139561	-0.1417	0.45343	0.543306
0.68	0.248747	0.138945	-0.13879	0.457229	0.550827
0.683333	0.248575	0.140039	-0.13665	0.461717	0.553501
0.686667	0.247208	0.139027	-0.13436	0.466259	0.556356
0.69	0.247766	0.139222	-0.13791	0.468739	0.556086
0.693333	0.244021	0.138421	-0.13727	0.473289	0.564561
0.696667	0.245664	0.137954	-0.13826	0.47712	0.562309
0.7	0.247636	0.138295	-0.14133	0.481524	0.568452
0.703333	0.252196	0.140375	-0.14247	0.48577	0.574265
0.706667	0.251759	0.140375	-0.14199	0.489602	0.583994
0.71	0.255906	0.1413	-0.143	0.492782	0.585783
0.713333	0.256824	0.141881	-0.1421	0.496727	0.59703
0.716667	0.252707	0.14399	-0.14076	0.499846	0.600735
0.72	0.252191	0.141749	-0.14055	0.503474	0.606274
0.723333	0.250795	0.141903	-0.1405	0.507466	0.609981
0.726667	0.247035	0.141692	-0.13902	0.510046	0.613432
0.73	0.245404	0.143618	-0.1391	0.514187	0.614666
0.733333	0.249281	0.14251	-0.13972	0.517762	0.620932
0.736667	0.24454	0.144452	-0.14122	0.523183	0.625378
0.74	0.246752	0.145484	-0.13966	0.527935	0.630727
0.743333	0.249268	0.145655	-0.14045	0.531914	0.637997
0.746667	0.251553	0.145872	-0.14071	0.534865	0.64304
0.75	0.250971	0.146224	-0.14023	0.538702	0.648361
0.753333	0.255655	0.147759	-0.13632	0.540594	0.656121
0.756667	0.253989	0.146466	-0.13752	0.544133	0.660145
0.76	0.254348	0.146875	-0.13288	0.549308	0.663931
0.763333	0.25145	0.146392	-0.13019	0.555127	0.669754
0.766667	0.250063	0.148041	-0.12713	0.558245	0.675681
0.77	0.248163	0.146043	-0.13056	0.563159	0.680506
0.773333	0.252724	0.146441	-0.12829	0.566268	0.685973
0.776667	0.250865	0.146989	-0.13095	0.567626	0.68898
0.78	0.252676	0.149256	-0.12901	0.569459	0.693885
0.783333	0.251735	0.149242	-0.13054	0.573409	0.697238
0.786667	0.251799	0.152871	-0.12863	0.576201	0.699381
0.79	0.253239	0.154391	-0.12844	0.579843	0.703622
0.793333	0.256969	0.156494	-0.12858	0.585356	0.711965
0.796667	0.25497	0.154372	-0.13298	0.588914	0.718619
0.8	0.258307	0.155391	-0.13311	0.593202	0.725345
0.803333	0.260974	0.154738	-0.13382	0.596507	0.734643
0.806667	0.262287	0.154376	-0.13337	0.600557	0.740864
0.81	0.259594	0.154405	-0.13346	0.603775	0.744686
0.813333	0.262486	0.157507	-0.13113	0.607299	0.748466
0.816667	0.260824	0.15845	-0.13145	0.611434	0.752061
0.82	0.262686	0.159591	-0.12793	0.614732	0.757367
0.823333	0.258392	0.161655	-0.12953	0.617767	0.764066
0.826667	0.259945	0.163326	-0.13038	0.622312	0.770162
0.83	0.257148	0.164539	-0.1324	0.625296	0.777149
0.833333	0.259598	0.164215	-0.13175	0.629414	0.783882
0.836667	0.256382	0.165396	-0.13272	0.634489	0.789316
0.84	0.258824	0.16581	-0.1326	0.638948	0.79284
0.843333	0.255285	0.164324	-0.13074	0.640801	0.794758
0.846667	0.259521	0.162106	-0.12915	0.645727	0.796011
0.85	0.256614	0.161909	-0.12865	0.647354	0.801543
0.853333	0.259959	0.160833	-0.12772	0.648847	0.807721
0.856667	0.260706	0.161973	-0.12711	0.651828	0.812696
0.86	0.263727	0.161186	-0.12581	0.655946	0.822058
0.863333	0.261892	0.161948	-0.12597	0.658835	0.829175
0.866667	0.266083	0.163543	-0.12474	0.661872	0.831603
0.87	0.267621	0.162724	-0.12438	0.666268	0.835722
0.873333	0.269004	0.162514	-0.12417	0.668875	0.840671
0.876667	0.272435	0.166266	-0.12392	0.673388	0.844784
0.88	0.270136	0.169312	-0.1216	0.675827	0.849802
0.883333	0.26603	0.169204	-0.11971	0.679389	0.853835
0.886667	0.265698	0.17169	-0.12331	0.682767	0.859218
0.89	0.264351	0.172998	-0.1219	0.686378	0.865471
0.893333	0.263856	0.171027	-0.12162	0.688939	0.866671
0.896667	0.264125	0.171804	-0.12331	0.69146	0.868324
0.9	0.269028	0.17306	-0.12633	0.696522	0.874598
0.903333	0.267952	0.17523	-0.12506	0.699364	0.877752
0.906667	0.265704	0.175774	-0.12472	0.702433	0.879293
0.91	0.258092	0.176338	-0.12467	0.706053	0.885572
0.913333	0.259348	0.174572	-0.12196	0.709698	0.893817
0.916667	0.255178	0.174495	-0.12497	0.713465	0.899472
0.92	0.252729	0.171151	-0.1239	0.717021	0.905699
0.923333	0.253847	0.170914	-0.126	0.719711	0.91021
0.926667	0.262968	0.173736	-0.12749	0.721871	0.914864
0.93	0.263717	0.174317	-0.1317	0.725725	0.91852
0.933333	0.264398	0.17595	-0.1294	0.728155	0.922045
0.936667	0.262237	0.178416	-0.1299	0.732285	0.927317
0.94	0.260518	0.180521	-0.12911	0.736316	0.932533
0.943333	0.257794	0.17965	-0.13038	0.740383	0.939748
0.946667	0.259017	0.180421	-0.12872	0.744064	0.943462
0.95	0.258364	0.180873	-0.12725	0.746376	0.95016
0.953333	0.265103	0.183119	-0.12769	0.748851	0.951146
0.956667	0.268934	0.181701	-0.12556	0.751978	0.95383
0.96	0.269113	0.181881	-0.12647	0.756146	0.955863
0.963333	0.26605	0.182925	-0.12987	0.760842	0.957708
0.966667	0.26577	0.185074	-0.12928	0.764996	0.960357
0.97	0.26394	0.184308	-0.12753	0.768754	0.96906
0.973333	0.258903	0.18574	-0.12882	0.772151	0.975855
0.976667	0.256509	0.185964	-0.12622	0.77322	0.98095
0.98	0.260101	0.185606	-0.1212	0.773329	0.986194
0.983333	0.263006	0.18596	-0.12357	0.77537	0.985561
0.986667	0.259908	0.185978	-0.12596	0.778811	0.991029
0.99	0.263618	0.188316	-0.12482	0.783153	0.994879
0.993333	0.265086	0.189969	-0.12543	0.786958	0.997167
0.996667	0.263106	0.193031	-0.12644	0.790592	1.00244
1	0.262992	0.191272	-0.12536	0.794448	1.01004
1.00333	0.268914	0.193793	-0.12705	0.796758	1.01256
1.00667	0.270102	0.193417	-0.12834	0.79969	1.01596
1.01	0.270974	0.191849	-0.12762	0.802582	1.01924
1.01333	0.272647	0.191874	-0.12483	0.807034	1.02267
1.01667	0.271956	0.193091	-0.12668	0.809832	1.02546
1.02	0.272472	0.191989	-0.11931	0.814115	1.02659
1.02333	0.270525	0.191484	-0.12172	0.814822	1.02969
1.02667	0.267478	0.194465	-0.1249	0.819246	1.03659
1.03	0.265479	0.195882	-0.12748	0.82181	1.04045
1.03333	0.26711	0.197485	-0.12708	0.824468	1.0457
1.03667	0.262199	0.199484	-0.1308	0.825223	1.05063
1.04	0.262741	0.201775	-0.12844	0.831656	1.05571
1.04333	0.265596	0.20394	-0.12719	0.833908	1.05769
1.04667	0.266335	0.205425	-0.1284	0.836749	1.06173
1.05	0.261986	0.203493	-0.12722	0.839915	1.06497
1.05333	0.267264	0.204381	-0.12619	0.841869	1.06833
1.05667	0.268362	0.204854	-0.12599	0.841484	1.07096
1.06	0.271477	0.204486	-0.12325	0.844721	1.07407
1.06333	0.272822	0.202559	-0.12164	0.84817	1.0774
1.06667	0.27668	0.20584	-0.12106	0.85253	1.07881
1.07	0.271731	0.206814	-0.12224	0.856597	1.08225
1.07333	0.273004	0.207474	-0.12143	0.859757	1.08579
1.07667	0.263971	0.208323	-0.12247	0.863774	1.08686
1.08	0.26364	0.209135	-0.12317	0.865623	1.08883
1.08333	0.266896	0.211175	-0.12251	0.869143	1.09376
1.08667	0.267549	0.21255	-0.12205	0.872236	1.10124
1.09	0.264549	0.212543	-0.12027	0.876905	1.10303
1.09333	0.274624	0.213837	-0.12079	0.878925	1.10947
1.09667	0.275393	0.216481	-0.11963	0.88305	1.11215
1.1	0.273321	0.217644	-0.11995	0.883212	1.11476
1.10333	0.275274	0.217416	-0.1187	0.886279	1.1164
1.10667	0.276478	0.218827	-0.11931	0.887219	1.11968
1.11	0.274133	0.219676	-0.11688	0.889098	1.12119
1.11333	0.27416	0.218509	-0.11802	0.890841	1.12614
1.11667	0.273146	0.217652	-0.11753	0.896329	1.1316
1.12	0.27121	0.218818	-0.11722	0.899666	1.13712
1.12333	0.272692	0.218708	-0.11648	0.903474	1.14237
1.12667	0.274249	0.219466	-0.11826	0.905851	1.14596
1.13	0.272994	0.222091	-0.11521	0.908837	1.15136
1.13333	0.270425	0.223189	-0.11638	0.908567	1.15448
1.13667	0.275149	0.221585	-0.11551	0.910619	1.1573
1.14	0.277189	0.224706	-0.11827	0.912291	1.16069
1.14333	0.276988	0.226452	-0.11568	0.916163	1.16552
1.14667	0.280382	0.226621	-0.11901	0.918835	1.1687
1.15	0.279078	0.225399	-0.11829	0.922253	1.17218
1.15333	0.278308	0.226984	-0.11926	0.924919	1.17456
1.15667	0.277113	0.225042	-0.11866	0.927321	1.17832
1.16	0.26998	0.222602	-0.12104	0.930109	1.18152
1.16333	0.264067	0.223337	-0.11793	0.931895	1.18338
1.16667	0.2709	0.225261	-0.11545	0.935868	1.18593
1.17	0.270548	0.22549	-0.11713	0.939246	1.19092
1.17333	0.266328	0.226748	-0.11772	0.94233	1.19337
1.17667	0.272491	0.22868	-0.11613	0.943814	1.19678
1.18	0.277558	0.230466	-0.11758	0.947785	1.19867
1.18333	0.272883	0.231988	-0.11748	0.949921	1.19801
1.18667	0.272971	0.236061	-0.1161	0.951462	1.19765
1.19	0.279404	0.237856	-0.11357	0.955124	1.20201
1.19333	0.280543	0.24009	-0.11459	0.957733	1.20418
1.19667	0.28039	0.238998	-0.11414	0.958305	1.20752
1.2	0.285934	0.239431	-0.11617	0.960098	1.21194
1.20333	0.288596	0.239874	-0.11436	0.963134	1.21909
1.20667	0.288594	0.238911	-0.11395	0.964411	1.22065
1.21	0.287308	0.237766	-0.11318	0.967561	1.22286
1.21333	0.286608	0.239356	-0.11406	0.971534	1.22714
1.21667	0.281197	0.240399	-0.11297	0.974182	1.23004
1.22	0.282706	0.240899	-0.11518	0.975819	1.2315
1.22333	0.27834	0.242123	-0.11601	0.977531	1.2317
1.22667	0.279394	0.243165	-0.11572	0.979829	1.23494
1.23	0.281065	0.242702	-0.11449	0.982318	1.23943
1.23333	0.283365	0.243063	-0.11462	0.985092	1.2448
1.23667	0.277587	0.244028	-0.114	0.989163	1.24787
1.24	0.278919	0.245771	-0.11297	0.991715	1.25275
1.24333	0.273385	0.248553	-0.11371	0.993657	1.25316
1.24667	0.269149	0.250609	-0.11499	0.997385	1.25173
1.25	0.269677	0.251937	-0.11513	0.999042	1.25297
1.25333	0.270014	0.253444	-0.11556	0.999532	1.25509
1.25667	0.271142	0.254683	-0.11623	1.00221	1.25652
1.26	0.276469	0.254475	-0.11555	1.00397	1.259
1.26333	0.277693	0.257046	-0.11419	1.00426	1.26269
1.26667	0.274975	0.256621	-0.114	1.00806	1.26475
1.27	0.279858	0.256722	-0.11208	1.01022	1.26525
1.27333	0.277442	0.259499	-0.11223	1.01152	1.2635
1.27667	0.276825	0.259171	-0.11147	1.01458	1.2633
1.28	0.282423	0.259369	-0.10893	1.01707	1.26667
1.28333	0.286186	0.261322	-0.10735	1.01841	1.26716
1.28667	0.280546	0.262326	-0.105	1.02107	1.2714
1.29	0.274999	0.262018	-0.10618	1.02583	1.27717
1.29333	0.272081	0.265111	-0.10284	1.02731	1.28416
1.29667	0.265701	0.265103	-0.10498	1.02841	1.28459
1.3	0.264386	0.267467	-0.10645	1.031	1.28713
1.30333	0.267165	0.267779	-0.10661	1.03372	1.28762
1.30667	0.278424	0.266209	-0.1044	1.03564	1.28911
1.31	0.283779	0.266885	-0.10754	1.03798	1.28952
1.31333	0.287968	0.266861	-0.10762	1.04204	1.28982
1.31667	0.289833	0.26533	-0.1068	1.04328	1.29149
1.32	0.293288	0.264735	-0.10869	1.04455	1.29392
1.32333	0.290895	0.269079	-0.10755	1.04637	1.29836
1.32667	0.290848	0.268055	-0.11005	1.04858	1.29824
1.33	0.29021	0.270095	-0.11012	1.05102	1.30041
1.33333	0.289985	0.271831	-0.11059	1.05383	1.30412
1.33667	0.289657	0.27444	-0.11258	1.05602	1.3011
1.34	0.291149	0.275811	-0.11605	1.05773	1.30323
1.34333	0.287707	0.275261	-0.11332	1.06075	1.30744
1.34667	0.289157	0.274475	-0.11231	1.06198	1.30736
1.35	0.291031	0.276577	-0.11109	1.06473	1.31007
1.35333	0.28923	0.276941	-0.10995	1.0683	1.31772
1.35667	0.283287	0.275025	-0.10747	1.0701	1.31749
1.36	0.284914	0.279469	-0.10695	1.07171	1.31671
1.36333	0.285043	0.282101	-0.10546	1.07403	1.3216
1.36667	0.285536	0.281113	-0.1047	1.07439	1.32128
1.37	0.279927	0.284072	-0.10432	1.07536	1.32227
1.37333	0.282397	0.287172	-0.10436	1.07703	1.32313
1.37667	0.282478	0.287858	-0.10353	1.07967	1.32607
1.38	0.280615	0.289857	-0.10423	1.08059	1.32934
1.38333	0.274967	0.293038	-0.10511	1.08446	1.33005
1.38667	0.279578	0.291634	-0.10439	1.08555	1.32976
1.39	0.281199	0.29367	-0.10294	1.08818	1.33145
1.39333	0.283582	0.295119	-0.1041	1.08916	1.33124
1.39667	0.284903	0.294486	-0.10585	1.09031	1.32963
1.4	0.290304	0.294598	-0.10553	1.09035	1.32998
1.40333	0.290952	0.296967	-0.10417	1.09236	1.3336
1.40667	0.284844	0.295333	-0.10387	1.09469	1.33187
1.41	0.280584	0.295495	-0.10302	1.09786	1.33782
1.41333	0.28234	0.297063	-0.10145	1.10099	1.34054
1.41667	0.28137	0.29831	-0.10201	1.10287	1.34406
1.42	0.279662	0.298704	-0.10346	1.10428	1.34232
1.42333	0.284266	0.302714	-0.10428	1.10658	1.34992
1.42667	0.286196	0.304115	-0.10482	1.10789	1.35122
1.43	0.281861	0.304462	-0.10654	1.10982	1.35307
1.43333	0.27966	0.305164	-0.10503	1.11149	1.35447
1.43667	0.279956	0.306908	-0.10484	1.1141	1.359
1.44	0.277677	0.306883	-0.1069	1.11433	1.35913
1.44333	0.276319	0.306795	-0.10614	1.11485	1.35822
1.44667	0.280211	0.310258	-0.10588	1.11742	1.35973
1.45	0.279877	0.312027	-0.10701	1.11949	1.35885
1.45333	0.283941	0.31363	-0.10675	1.1227	1.35988
1.45667	0.283172	0.315261	-0.105	1.12487	1.35908
1.46	0.283376	0.317297	-0.10531	1.12676	1.36132
1.46333	0.285045	0.317632	-0.1033	1.1274	1.35964
1.46667	0.28851	0.316295	-0.1033	1.12973	1.36191
1.47	0.283973	0.317378	-0.10297	1.12959	1.36239
1.47333	0.285526	0.317581	-0.10067	1.13049	1.36256
1.47667	0.286615	0.318206	-0.10223	1.13422	1.36055
1.48	0.281779	0.319791	-0.10412	1.13546	1.36487
1.48333	0.279392	0.323573	-0.10459	1.13672	1.36689
1.48667	0.280527	0.324375	-0.10489	1.13982	1.36709
1.49	0.280331	0.328045	-0.10664	1.14281	1.37201
1.49333	0.280825	0.330848	-0.10442	1.14322	1.37733
1.49667	0.282506	0.330772	-0.1033	1.14506	1.3777
1.5	0.282814	0.332055	-0.1025	1.14774	1.38234
1.50333	0.282156	0.332783	-0.10228	1.14813	1.38486
1.50667	0.287914	0.330487	-0.10319	1.14904	1.38572
1.51	0.287897	0.331103	-0.10277	1.15068	1.38476
1.51333	0.289153	0.332853	-0.10214	1.15181	1.38745
1.51667	0.294227	0.333391	-0.10043	1.15187	1.38349
1.52	0.298061	0.334453	-0.09921	1.1541	1.38516
1.52333	0.298155	0.337142	-0.09693	1.15698	1.38491
1.52667	0.301002	0.338865	-0.09505	1.15912	1.38825
1.53	0.302884	0.340323	-0.09409	1.16276	1.38666
1.53333	0.298301	0.340202	-0.09203	1.16477	1.3867
1.53667	0.296502	0.34158	-0.09207	1.16619	1.38482
1.54	0.293484	0.343483	-0.09324	1.16571	1.38741
1.54333	0.289257	0.344326	-0.09584	1.16667	1.38413
1.54667	0.289762	0.346013	-0.09794	1.16609	1.38547
1.55	0.29285	0.348796	-0.10013	1.16715	1.38897
1.55333	0.294989	0.351094	-0.1011	1.16844	1.3914
1.55667	0.294515	0.352439	-0.10067	1.17153	1.39453
1.56	0.29942	0.353037	-0.10236	1.17266	1.40138
1.56333	0.295611	0.352604	-0.10177	1.17496	1.40272
1.56667	0.293249	0.355097	-0.10154	1.17864	1.40353
1.57	0.28895	0.354729	-0.10164	1.17921	1.40588
1.57333	0.286933	0.356913	-0.10292	1.17953	1.40505
1.57667	0.283534	0.357613	-0.10101	1.18017	1.4009
1.58	0.286697	0.358589	-0.0987	1.18208	1.40192
1.58333	0.289159	0.357604	-0.09789	1.18244	1.40485
1.58667	0.294342	0.35946	-0.09856	1.18529	1.40714
1.59	0.299961	0.359077	-0.09498	1.18709	1.40824
1.59333	0.29837	0.360191	-0.09535	1.18954	1.409
1.59667	0.293507	0.362269	-0.09605	1.19169	1.40831
1.6	0.291334	0.364775	-0.09664	1.1928	1.40585
1.60333	0.289593	0.365479	-0.09565	1.19301	1.40541
1.60667	0.286343	0.366229	-0.09824	1.1943	1.40431
1.61	0.286759	0.368018	-0.09669	1.19636	1.40762
1.61333	0.289785	0.370211	-0.09704	1.19596	1.40947
1.61667	0.289664	0.370664	-0.09497	1.19787	1.41554
1.62	0.288552	0.371216	-0.09589	1.19916	1.41627
1.62333	0.288397	0.37272	-0.09389	1.20153	1.41832
1.62667	0.295853	0.374531	-0.09457	1.20075	1.41877
1.63	0.298369	0.373957	-0.0954	1.20189	1.41811
1.63333	0.301748	0.377883	-0.09709	1.20401	1.41306
1.63667	0.302826	0.381061	-0.09582	1.20655	1.41132
1.64	0.310323	0.383131	-0.09617	1.20619	1.41193
1.64333	0.303625	0.383883	-0.09414	1.20925	1.4076
1.64667	0.299325	0.386848	-0.09437	1.21137	1.40775
1.65	0.298595	0.385347	-0.09336	1.21223	1.41178
1.65333	0.302449	0.387833	-0.09273	1.21305	1.41249
1.65667	0.300556	0.388918	-0.0913	1.21502	1.41103
1.66	0.306519	0.390787	-0.09107	1.21509	1.41691
1.66333	0.31428	0.393067	-0.09122	1.21715	1.42183
1.66667	0.314369	0.394831	-0.09409	1.21714	1.41919
1.67	0.314186	0.395134	-0.09266	1.21891	1.42155
1.67333	0.313018	0.399094	-0.09525	1.22029	1.42477
1.67667	0.308383	0.400808	-0.09688	1.22127	1.42518
1.68	0.300466	0.400647	-0.09403	1.2218	1.42438
1.68333	0.302191	0.401642	-0.09249	1.2224	1.42562
1.68667	0.300714	0.401351	-0.09268	1.22277	1.42063
1.69	0.300705	0.402311	-0.08998	1.22258	1.42253
1.69333	0.300191	0.404878	-0.09025	1.22449	1.41775
1.69667	0.301834	0.404326	-0.09061	1.22488	1.42053
1.7	0.300182	0.408184	-0.09154	1.22673	1.42153
1.70333	0.299605	0.412042	-0.0923	1.22801	1.42711
1.70667	0.294083	0.412401	-0.0941	1.23013	1.42738
1.71	0.297637	0.412537	-0.09412	1.23043	1.43372
1.71333	0.300338	0.416979	-0.09754	1.23222	1.4297
1.71667	0.296453	0.415991	-0.09735	1.23381	1.4306
1.72	0.296709	0.417371	-0.09719	1.23493	1.43145
1.72333	0.3004	0.418196	-0.09626	1.23681	1.43204
1.72667	0.30082	0.418862	-0.09517	1.24064	1.43054
1.73	0.300695	0.419218	-0.09217	1.24161	1.43308
1.73333	0.308468	0.421813	-0.08984	1.24328	1.43762
1.73667	0.308277	0.421809	-0.09035	1.24348	1.43827
1.74	0.310918	0.423722	-0.09028	1.24399	1.43747
1.74333	0.306862	0.424313	-0.09004	1.24318	1.43828
1.74667	0.311995	0.425474	-0.09007	1.2447	1.4387
1.75	0.310448	0.425597	-0.08795	1.24513	1.43762
1.75333	0.309045	0.426814	-0.08657	1.24669	1.43686
1.75667	0.304942	0.428668	-0.08622	1.24938	1.43517
1.76	0.308776	0.430772	-0.08782	1.24965	1.4368
1.76333	0.301779	0.431781	-0.08796	1.25016	1.43703
1.76667	0.294054	0.43286	-0.09154	1.25199	1.43606
1.77	0.295662	0.434155	-0.091	1.25403	1.4362
1.77333	0.299724	0.433556	-0.09072	1.25352	1.436
1.77667	0.302822	0.437092	-0.08952	1.25525	1.43796
1.78	0.302931	0.439151	-0.0879	1.2559	1.43723
1.78333	0.307681	0.441369	-0.08653	1.25523	1.43707
1.78667	0.305849	0.443185	-0.08825	1.25577	1.43759
1.79	0.30459	0.446928	-0.08726	1.2555	1.44027
1.79333	0.298355	0.446158	-0.0855	1.25784	1.43761
1.79667	0.300845	0.445811	-0.08528	1.25918	1.43974
1.8	0.304467	0.446934	-0.08604	1.25882	1.43911
1.80333	0.305985	0.448584	-0.08433	1.26044	1.44031
1.80667	0.308697	0.449215	-0.08755	1.26286	1.44044
1.81	0.311154	0.451491	-0.08845	1.26212	1.44033
1.81333	0.311958	0.452663	-0.09212	1.26371	1.43864
1.81667	0.311608	0.453587	-0.09191	1.26726	1.44115
1.82	0.313748	0.456108	-0.09347	1.26743	1.44285
1.82333	0.311311	0.455148	-0.09267	1.26685	1.44357
1.82667	0.312909	0.455505	-0.09548	1.26788	1.44538
1.83	0.316391	0.460058	-0.09183	1.26806	1.4458
1.83333	0.31646	0.463584	-0.09206	1.26688	1.44527
1.83667	0.317368	0.463159	-0.09263	1.2674	1.44604
1.84	0.319667	0.468409	-0.09361	1.26867	1.44621
1.84333	0.315007	0.469453	-0.09116	1.26825	1.44634
1.84667	0.310591	0.469081	-0.09161	1.26818	1.44646
1.85	0.306231	0.468745	-0.08864	1.27138	1.44868
1.85333	0.307548	0.472175	-0.08734	1.27264	1.44813
1.85667	0.302574	0.474431	-0.08401	1.27417	1.44729
1.86	0.306268	0.478619	-0.08356	1.27516	1.44802
1.86333	0.308436	0.480788	-0.08361	1.27814	1.44913
1.86667	0.31237	0.483196	-0.08555	1.27868	1.44734
1.87	0.307434	0.483839	-0.086	1.27883	1.4478
1.87333	0.310221	0.482784	-0.08522	1.28023	1.44919
1.87667	0.30861	0.485223	-0.08499	1.28158	1.44962
1.88	0.305771	0.488785	-0.08723	1.27967	1.45276
1.88333	0.303468	0.491869	-0.08699	1.27956	1.45353
1.88667	0.306694	0.49392	-0.08479	1.28115	1.45296
1.89	0.304936	0.496974	-0.08613	1.28091	1.45307
1.89333	0.312505	0.494502	-0.08612	1.28261	1.45239
1.89667	0.314464	0.49526	-0.0831	1.28583	1.45151
1.9	0.315363	0.493663	-0.08443	1.2863	1.45021
1.90333	0.314382	0.495578	-0.0852	1.28704	1.45061
1.90667	0.316374	0.496174	-0.08358	1.2884	1.45245
1.91	0.309896	0.498941	-0.08206	1.28838	1.45465
1.91333	0.309371	0.500604	-0.08096	1.28834	1.45341
1.91667	0.311379	0.504189	-0.08029	1.29004	1.45103
1.92	0.310208	0.505708	-0.07923	1.2911	1.44672
1.92333	0.312517	0.508712	-0.0818	1.29154	1.44896
1.92667	0.316497	0.512567	-0.08511	1.29387	1.44519
1.93	0.316467	0.513376	-0.08543	1.29472	1.44584
1.93333	0.313579	0.515794	-0.08505	1.29375	1.44938
1.93667	0.315863	0.516789	-0.08778	1.29437	1.45604
1.94	0.318703	0.519137	-0.08742	1.29632	1.45624
1.94333	0.319156	0.517746	-0.08469	1.29558	1.45989
1.94667	0.321116	0.518577	-0.0851	1.29597	1.45983
1.95	0.324092	0.521063	-0.08539	1.29872	1.46091
1.95333	0.323813	0.521951	-0.084	1.29773	1.46039
1.95667	0.319504	0.52411	-0.08216	1.29752	1.45746
1.96	0.314696	0.526749	-0.08152	1.29825	1.45828
1.96333	0.313891	0.529191	-0.08167	1.30008	1.45877
1.96667	0.314615	0.530636	-0.07952	1.29982	1.46095
1.97	0.315239	0.532242	-0.07898	1.30088	1.46238
1.97333	0.318516	0.533174	-0.08129	1.30208	1.46383
1.97667	0.320797	0.534901	-0.08302	1.30169	1.46166
1.98	0.321908	0.536957	-0.0843	1.30162	1.46227
1.98333	0.321229	0.537986	-0.08518	1.30362	1.46234
1.98667	0.320361	0.540515	-0.08777	1.30473	1.46005
1.99	0.319965	0.544516	-0.08855	1.30512	1.46067
1.99333	0.323791	0.547409	-0.09077	1.30771	1.46422
1.99667	0.324364	0.548259	-0.09142	1.3063	1.46586
2	0.324963	0.54729	-0.09364	1.30418	1.46445
2.00333	0.325498	0.546965	-0.09282	1.3075	1.46493
2.00667	0.321956	0.546802	-0.09187	1.30671	1.46366
2.01	0.315429	0.547149	-0.08728	1.30791	1.46169
2.01333	0.315578	0.549289	-0.08674	1.30953	1.46253
2.01667	0.313802	0.553068	-0.08467	1.31188	1.46225
2.02	0.316068	0.557344	-0.08262	1.31096	1.45934
2.02333	0.319035	0.560355	-0.08381	1.31161	1.46139
2.02667	0.324547	0.563923	-0.08812	1.31094	1.46132
2.03	0.323226	0.566352	-0.08891	1.3129	1.45667
2.03333	0.324956	0.567904	-0.09011	1.31585	1.45702
2.03667	0.321653	0.569179	-0.093	1.31656	1.45925
2.04	0.325907	0.568645	-0.09172	1.31916	1.45886
2.04333	0.325717	0.568721	-0.09009	1.31981	1.46016
2.04667	0.323238	0.568295	-0.0893	1.31881	1.46286
2.05	0.32001	0.570174	-0.08993	1.31763	1.46299
2.05333	0.322552	0.573375	-0.08857	1.3162	1.46378
2.05667	0.315253	0.574293	-0.08824	1.31686	1.46401
2.06	0.318614	0.575993	-0.08882	1.3169	1.46373
2.06333	0.3216	0.580467	-0.08761	1.31791	1.46254
2.06667	0.322959	0.582331	-0.08791	1.31757	1.46158
2.07	0.31827	0.582287	-0.08561	1.31925	1.46346
2.07333	0.321927	0.587173	-0.08594	1.31841	1.46289
2.07667	0.314167	0.588201	-0.08423	1.32025	1.465
2.08	0.316893	0.589713	-0.08358	1.31915	1.46624
2.08333	0.319033	0.59271	-0.08216	1.32123	1.46682
2.08667	0.324388	0.595425	-0.08471	1.32011	1.46416
2.09	0.324748	0.595663	-0.08517	1.32158	1.46387
2.09333	0.326626	0.600714	-0.08451	1.32011	1.46186
2.09667	0.325247	0.601898	-0.08628	1.32124	1.46458
2.1	0.326807	0.601963	-0.08557	1.32102	1.46527
2.10333	0.326913	0.602539	-0.0844	1.32358	1.46733
2.10667	0.326234	0.604633	-0.08236	1.32366	1.46774
2.11	0.32831	0.605295	-0.0847	1.32595	1.4676
2.11333	0.331369	0.608052	-0.08435	1.32722	1.46501
2.11667	0.332109	0.609521	-0.08579	1.32626	1.46387
2.12	0.333536	0.611723	-0.08355	1.3263	1.46186
2.12333	0.332059	0.613907	-0.08439	1.32667	1.4636
2.12667	0.329924	0.615848	-0.0863	1.32629	1.4612
2.13	0.3205	0.614626	-0.08643	1.32816	1.4615
2.13333	0.319246	0.616496	-0.0862	1.32881	1.46399
2.13667	0.320065	0.6192	-0.08886	1.33066	1.46799
2.14	0.325047	0.622073	-0.09078	1.32958	1.46781
2.14333	0.328215	0.624177	-0.08716	1.3316	1.47102
2.14667	0.335231	0.629353	-0.08746	1.33152	1.47212
2.15	0.334639	0.632444	-0.08643	1.33313	1.47105
2.15333	0.329586	0.63335	-0.08449	1.33086	1.46722
2.15667	0.328123	0.63552	-0.08138	1.33203	1.46775
2.16	0.330122	0.636673	-0.08078	1.32992	1.46833
2.16333	0.328831	0.63693	-0.07902	1.32803	1.46714
2.16667	0.328141	0.637288	-0.07678	1.32851	1.4669
2.17	0.331078	0.639362	-0.07702	1.32882	1.47096
2.17333	0.33159	0.64161	-0.07851	1.32957	1.47171
2.17667	0.32879	0.645245	-0.07871	1.33093	1.47463
2.18	0.331054	0.64768	-0.07827	1.33426	1.47554
2.18333	0.332607	0.652475	-0.0775	1.33436	1.47733
2.18667	0.332897	0.655209	-0.07842	1.33565	1.47776
2.19	0.331738	0.654895	-0.07644	1.33618	1.47849
2.19333	0.330101	0.65504	-0.07996	1.33625	1.47454
2.19667	0.326167	0.658242	-0.07951	1.33538	1.47503
2.2	0.326282	0.658789	-0.08283	1.33504	1.47369
2.20333	0.324668	0.66037	-0.08404	1.33605	1.47256
2.20667	0.326804	0.662833	-0.08464	1.3365	1.47159
2.21	0.329375	0.664429	-0.08149	1.33884	1.47186
2.21333	0.333002	0.664435	-0.08398	1.3396	1.47233
2.21667	0.334989	0.667548	-0.08388	1.34134	1.47312
2.22	0.337994	0.669504	-0.08413	1.34096	1.47375
2.22333	0.336423	0.67196	-0.08365	1.33979	1.47242
2.22667	0.339291	0.675424	-0.08233	1.34139	1.47271
2.23	0.337611	0.678	-0.08167	1.34167	1.47242
2.23333	0.332802	0.678267	-0.08215	1.34175	1.47196
2.23667	0.332081	0.679829	-0.08192	1.34276	1.46914
2.24	0.33281	0.681246	-0.08155	1.34521	1.46737
2.24333	0.328653	0.684016	-0.08098	1.34294	1.46938
2.24667	0.32463	0.686745	-0.0799	1.34181	1.466
2.25	0.327093	0.689389	-0.07778	1.34136	1.46815
2.25333	0.326958	0.691247	-0.07602	1.3411	1.46951
2.25667	0.329052	0.695082	-0.07738	1.34098	1.47284
2.26	0.329349	0.696689	-0.08092	1.34259	1.47326
2.26333	0.331191	0.698307	-0.08018	1.34371	1.476
2.26667	0.33742	0.69936	-0.08103	1.34564	1.47528
2.27	0.339824	0.701497	-0.08052	1.34873	1.47413
2.27333	0.337193	0.703004	-0.08106	1.34806	1.4748
2.27667	0.342477	0.706176	-0.08019	1.34728	1.47376
2.28	0.34745	0.710327	-0.08057	1.34943	1.47515
2.28333	0.339809	0.714172	-0.08099	1.35006	1.475
2.28667	0.337899	0.716316	-0.08214	1.34915	1.47688
2.29	0.336612	0.718154	-0.08163	1.34997	1.47572
2.29333	0.333871	0.719172	-0.08126	1.35148	1.47702
2.29667	0.330904	0.719178	-0.08162	1.35022	1.47679
2.3	0.335696	0.71923	-0.08134	1.34774	1.4754
2.30333	0.337122	0.720854	-0.08078	1.347	1.47677
2.30667	0.340837	0.725046	-0.07816	1.34883	1.47708
2.31	0.343098	0.724748	-0.07846	1.34802	1.47413
2.31333	0.344609	0.726725	-0.07859	1.34947	1.47026
2.31667	0.342715	0.73006	-0.07741	1.3508	1.4714
2.32	0.338767	0.731485	-0.07886	1.35223	1.47012
2.32333	0.338107	0.732253	-0.0798	1.35136	1.4695
2.32667	0.335886	0.73533	-0.08021	1.35228	1.47161
2.33	0.33235	0.73866	-0.07856	1.35333	1.47496
2.33333	0.333585	0.739503	-0.07935	1.35337	1.47646
2.33667	0.333975	0.743624	-0.07626	1.35147	1.47629
2.34	0.334785	0.743529	-0.07607	1.35254	1.47695
2.34333	0.330992	0.748455	-0.07492	1.35162	1.47664
2.34667	0.336332	0.74789	-0.07672	1.35126	1.47725
2.35	0.338239	0.750351	-0.07819	1.35172	1.47581
2.35333	0.339786	0.752329	-0.07844	1.35454	1.47432
2.35667	0.337362	0.755705	-0.07756	1.35418	1.47167
2.36	0.340965	0.756623	-0.07558	1.35485	1.4724
2.36333	0.345051	0.759455	-0.0728	1.35572	1.4717
2.36667	0.344724	0.762675	-0.07037	1.35678	1.47033
2.37	0.344756	0.761749	-0.07023	1.35558	1.47386
2.37333	0.345839	0.761655	-0.07138	1.35552	1.47771
2.37667	0.34587	0.765328	-0.07396	1.35708	1.47827
2.38	0.341662	0.766983	-0.07627	1.35503	1.47805
2.38333	0.341242	0.767597	-0.07688	1.35446	1.47887
2.38667	0.343042	0.772607	-0.07983	1.35479	1.47656
2.39	0.342107	0.775903	-0.08039	1.35626	1.47499
2.39333	0.344543	0.779081	-0.07666	1.35495	1.47359
2.39667	0.343873	0.782152	-0.07641	1.35643	1.47611
2.4	0.343901	0.784498	-0.07483	1.35692	1.4751
2.40333	0.342415	0.787343	-0.07203	1.35792	1.4738
2.40667	0.34678	0.790303	-0.06991	1.35709	1.47436
2.41	0.347462	0.789167	-0.07065	1.35676	1.47408
2.41333	0.344474	0.790682	-0.06849	1.35818	1.47145
2.41667	0.345251	0.792748	-0.0697	1.36005	1.47307
2.42	0.345165	0.795308	-0.06963	1.35924	1.47393
2.42333	0.341346	0.796759	-0.07118	1.36011	1.47276
2.42667	0.340764	0.800564	-0.07029	1.36064	1.47152
2.43	0.342907	0.803194	-0.06965	1.36121	1.47266
2.43333	0.339293	0.80417	-0.06747	1.3602	1.47356
2.43667	0.335265	0.805024	-0.06708	1.36165	1.47608
2.44	0.335909	0.809182	-0.06814	1.3611	1.477
2.44333	0.332024	0.811631	-0.06881	1.36343	1.47829
2.44667	0.332021	0.814258	-0.06874	1.36222	1.47844
2.45	0.331656	0.818079	-0.0711	1.36082	1.47881
2.45333	0.33783	0.818822	-0.07026	1.36147	1.47706
2.45667	0.337381	0.818523	-0.06785	1.36221	1.47633
2.46	0.343527	0.821194	-0.06868	1.36049	1.47554
2.46333	0.345706	0.823047	-0.07183	1.36024	1.4752
2.46667	0.349716	0.824993	-0.06777	1.36086	1.47591
2.47	0.352069	0.829287	-0.07097	1.35971	1.47552
2.47333	0.357902	0.831501	-0.07315	1.36032	1.47612
2.47667	0.358031	0.832162	-0.07202	1.36095	1.47838
2.48	0.360625	0.833992	-0.07093	1.36137	1.47994
2.48333	0.361342	0.83474	-0.07486	1.36241	1.47709
2.48667	0.357363	0.835941	-0.07321	1.36371	1.47579
2.49	0.351668	0.838881	-0.07253	1.3635	1.47626
2.49333	0.345717	0.842653	-0.07324	1.36292	1.47536
2.49667	0.343666	0.846201	-0.07354	1.3624	1.47472
2.5	0.341503	0.849079	-0.07347	1.36245	1.47796
2.50333	0.343834	0.850524	-0.0732	1.36176	1.47934
2.50667	0.345448	0.853501	-0.07149	1.3622	1.47889
2.51	0.346842	0.855994	-0.07086	1.3634	1.47906
2.51333	0.347402	0.858954	-0.0704	1.36493	1.47797
2.51667	0.346264	0.86351	-0.06958	1.36639	1.47812
2.52	0.343119	0.867662	-0.07017	1.36627	1.48046
2.52333	0.342839	0.870631	-0.07112	1.36657	1.48226
2.52667	0.344293	0.873127	-0.07269	1.36707	1.48369
2.53	0.337578	0.872913	-0.07231	1.3682	1.48374
2.53333	0.341762	0.874501	-0.07122	1.36834	1.4826
2.53667	0.344891	0.876235	-0.07038	1.36993	1.48002
2.54	0.346263	0.877612	-0.07042	1.36988	1.48053
2.54333	0.345134	0.878401	-0.06842	1.36914	1.4795
2.54667	0.352651	0.881574	-0.06837	1.36809	1.47993
2.55	0.350404	0.884218	-0.06997	1.36666	1.47936
2.55333	0.350182	0.887531	-0.06994	1.36645	1.48209
2.55667	0.350607	0.889086	-0.0694	1.36561	1.48264
2.56	0.352961	0.892231	-0.07054	1.36611	1.48333
2.56333	0.35061	0.891785	-0.07091	1.36556	1.48347
2.56667	0.346606	0.893081	-0.07023	1.36703	1.48528
2.57	0.346836	0.893766	-0.0699	1.3678	1.48552
2.57333	0.344074	0.897658	-0.07084	1.36887	1.48379
2.57667	0.341664	0.902278	-0.06965	1.36969	1.48134
2.58	0.342803	0.906347	-0.06823	1.37058	1.4825
2.58333	0.344602	0.908036	-0.06753	1.36999	1.48237
2.58667	0.346024	0.90939	-0.06809	1.36992	1.48112
2.59	0.349515	0.911869	-0.06673	1.36952	1.48065
2.59333	0.351434	0.915983	-0.06695	1.37013	1.48141
2.59667	0.350272	0.919022	-0.0675	1.36941	1.48315
2.6	0.348922	0.922612	-0.06872	1.37129	1.48258
2.60333	0.347744	0.926205	-0.06499	1.36979	1.48316
2.60667	0.346427	0.927299	-0.06623	1.37026	1.48313
2.61	0.351894	0.927077	-0.06341	1.36985	1.48475
2.61333	0.354574	0.929715	-0.06437	1.37044	1.48506
2.61667	0.359859	0.933805	-0.0629	1.36979	1.48472
2.62	0.35778	0.93535	-0.06511	1.37067	1.48389
2.62333	0.36347	0.937068	-0.06409	1.37013	1.48306
2.62667	0.353431	0.93942	-0.06573	1.36897	1.48331
2.63	0.358179	0.94215	-0.06369	1.36873	1.48122
2.63333	0.361729	0.942457	-0.06392	1.36862	1.48226
2.63667	0.356096	0.945149	-0.06413	1.36961	1.48493
2.64	0.354429	0.948701	-0.06455	1.37028	1.48708
2.64333	0.359637	0.95197	-0.06653	1.37331	1.48742
2.64667	0.348922	0.953128	-0.06823	1.37435	1.48626
2.65	0.344152	0.955138	-0.0693	1.37379	1.48307
2.65333	0.35212	0.957471	-0.06906	1.37231	1.48143
2.65667	0.350774	0.958854	-0.06902	1.373	1.47526
2.66	0.355663	0.961926	-0.06686	1.37109	1.47429
2.66333	0.36001	0.963423	-0.0654	1.37152	1.46953
2.66667	0.361988	0.966942	-0.06462	1.37261	1.47354
2.67	0.357945	0.970738	-0.06401	1.37407	1.47164
2.67333	0.357853	0.973253	-0.06314	1.37488	1.47795
2.67667	0.349629	0.975977	-0.06491	1.37456	1.4772
2.68	0.348749	0.981742	-0.06449	1.3743	1.4811
2.68333	0.34698	0.984468	-0.0631	1.37521	1.47835
2.68667	0.351794	0.98609	-0.06477	1.37527	1.47935
2.69	0.347369	0.988893	-0.0631	1.37472	1.47753
2.69333	0.350747	0.990887	-0.0639	1.37664	1.47846
2.69667	0.354776	0.991984	-0.06449	1.37685	1.48009
2.7	0.355989	0.99565	-0.06475	1.37588	1.48
2.70333	0.35651	1.0001	-0.0616	1.37806	1.48015
2.70667	0.356193	1.00328	-0.0624	1.37899	1.47953
2.71	0.354966	1.00529	-0.06091	1.37886	1.47923
2.71333	0.351536	1.00484	-0.05913	1.37719	1.4792
2.71667	0.349163	1.00603	-0.05817	1.37818	1.48075
2.72	0.348115	1.00616	-0.05898	1.37696	1.47986
2.72333	0.350699	1.00878	-0.05924	1.37503	1.4824
2.72667	0.353119	1.01079	-0.05705	1.37461	1.48265
2.73	0.35672	1.01544	-0.05903	1.37653	1.48315
2.73333	0.358243	1.0165	-0.06108	1.37623	1.48142
2.73667	0.358284	1.01959	-0.06304	1.37685	1.48184
2.74	0.361051	1.02244	-0.06337	1.37895	1.4796
2.74333	0.360892	1.02642	-0.06651	1.37858	1.48152
2.74667	0.355145	1.02897	-0.06499	1.37801	1.48163
2.75	0.352791	1.03292	-0.06356	1.37746	1.48262
2.75333	0.35719	1.03772	-0.06247	1.37543	1.48258
2.75667	0.35546	1.03916	-0.06324	1.37557	1.48253
2.76	0.353861	1.04137	-0.0617	1.37545	1.48095
2.76333	0.358855	1.04451	-0.0637	1.37658	1.48134
2.76667	0.362079	1.04524	-0.06439	1.37961	1.47981
2.77	0.355892	1.04581	-0.0641	1.37931	1.47868
2.77333	0.353722	1.04872	-0.06274	1.37762	1.48088
2.77667	0.358755	1.05302	-0.06151	1.37863	1.47924
2.78	0.356133	1.05475	-0.05867	1.37785	1.47974
2.78333	0.356025	1.05931	-0.05788	1.37454	1.4795
2.78667	0.362716	1.06142	-0.05687	1.37808	1.48244
2.79	0.366108	1.06499	-0.05654	1.37863	1.48226
2.79333	0.363563	1.06455	-0.05669	1.37857	1.48412
2.79667	0.369123	1.06889	-0.0577	1.37876	1.48108
2.8	0.371122	1.07111	-0.05741	1.37934	1.48385
2.80333	0.369672	1.07525	-0.05785	1.37848	1.48442
2.80667	0.372903	1.07512	-0.05741	1.37675	1.48453
2.81	0.374468	1.07994	-0.05948	1.37766	1.48382
2.81333	0.370065	1.08103	-0.06038	1.37843	1.48527
2.81667	0.370032	1.08435	-0.06027	1.37945	1.48538
2.82	0.369473	1.08547	-0.06218	1.37807	1.48244
2.82333	0.3641	1.08852	-0.06405	1.38218	1.4826
2.82667	0.365085	1.09075	-0.06207	1.38243	1.48318
2.83	0.369841	1.09593	-0.06175	1.38285	1.48419
2.83333	0.372736	1.09715	-0.06266	1.38212	1.48315
2.83667	0.373882	1.10001	-0.05976	1.38373	1.48431
2.84	0.374462	1.10295	-0.05707	1.38137	1.48387
2.84333	0.374419	1.10673	-0.05608	1.38012	1.48358
2.84667	0.37504	1.10746	-0.0571	1.38051	1.4833
2.85	0.372043	1.11192	-0.05574	1.37982	1.48522
2.85333	0.371121	1.11321	-0.05753	1.37899	1.47993
2.85667	0.370337	1.11641	-0.05783	1.38086	1.48146
2.86	0.37305	1.119	-0.05745	1.38171	1.47897
2.86333	0.368615	1.12114	-0.057	1.38073	1.47998
2.86667	0.369771	1.12267	-0.05537	1.38301	1.47624
2.87	0.368133	1.12572	-0.05386	1.38258	1.48351
2.87333	0.371884	1.12806	-0.05556	1.38095	1.4832
2.87667	0.367397	1.13017	-0.05614	1.38194	1.48859
2.88	0.366789	1.13327	-0.05454	1.38192	1.48895
2.88333	0.368336	1.13278	-0.05686	1.38039	1.49053
2.88667	0.374773	1.13674	-0.05763	1.38251	1.48712
2.89	0.373473	1.14036	-0.05634	1.38263	1.48522
2.89333	0.377275	1.14089	-0.05484	1.38129	1.48165
2.89667	0.381696	1.1421	-0.05545	1.38074	1.48153
2.9	0.379076	1.14687	-0.05455	1.38233	1.48091
2.90333	0.373847	1.14848	-0.0538	1.38117	1.4832
2.90667	0.372231	1.14953	-0.05428	1.38203	1.48387
2.91	0.371164	1.15336	-0.05521	1.38288	1.48345
2.91333	0.37034	1.15517	-0.05398	1.38378	1.48165
2.91667	0.369534	1.15691	-0.05505	1.38314	1.48208
2.92	0.367574	1.1584	-0.05669	1.38301	1.48139
2.92333	0.372457	1.16197	-0.05641	1.38353	1.48067
2.92667	0.371188	1.16275	-0.05844	1.38323	1.48038
2.93	0.370112	1.16758	-0.05976	1.38474	1.48181
2.93333	0.372519	1.16884	-0.05915	1.38587	1.48152
2.93667	0.373977	1.17191	-0.05834	1.38689	1.48282
2.94	0.369768	1.17446	-0.05567	1.38548	1.48244
2.94333	0.372863	1.17977	-0.05383	1.38634	1.48305
2.94667	0.37443	1.18209	-0.0543	1.3828	1.48218
2.95	0.376789	1.18558	-0.05473	1.38197	1.48244
2.95333	0.38241	1.18875	-0.05479	1.38098	1.48158
2.95667	0.387579	1.19103	-0.05624	1.38363	1.48231
2.96	0.387397	1.19358	-0.05586	1.3833	1.48261
2.96333	0.392503	1.19741	-0.0555	1.38584	1.48274
2.96667	0.392729	1.19994	-0.05412	1.38583	1.4829
2.97	0.38933	1.20282	-0.05372	1.38584	1.48081
2.97333	0.38386	1.20457	-0.05295	1.38374	1.4799
2.97667	0.381053	1.20779	-0.0539	1.38363	1.48077
2.98	0.374154	1.2083	-0.05345	1.38214	1.48183
2.98333	0.370734	1.21132	-0.05358	1.38207	1.48215
2.98667	0.371539	1.21389	-0.05141	1.38236	1.48463
2.99	0.377951	1.21716	-0.05298	1.38248	1.4853
2.99333	0.383559	1.21981	-0.05278	1.38257	1.48627
2.99667	0.387021	1.22204	-0.05113	1.3853	1.48508
3	0.39137	1.22412	-0.05193	1.38603	1.48321
3.00333	0.391043	1.22539	-0.05409	1.38597	1.48282
3.00667	0.387455	1.22776	-0.05353	1.38649	1.48348
3.01	0.379274	1.23261	-0.05162	1.38726	1.48498
3.01333	0.380997	1.239	-0.04937	1.38559	1.48482
3.01667	0.373408	1.24251	-0.04762	1.38592	1.48805
3.02	0.369324	1.2446	-0.04639	1.3853	1.48709
3.02333	0.370589	1.24775	-0.04479	1.38589	1.48834
3.02667	0.375383	1.24712	-0.04715	1.38505	1.48528
3.03	0.370513	1.24701	-0.04826	1.38566	1.48521
3.03333	0.377763	1.24935	-0.04953	1.38288	1.48311
3.03667	0.382846	1.25243	-0.04901	1.38314	1.48507
3.04	0.38177	1.25461	-0.05111	1.38332	1.48579
3.04333	0.384036	1.25818	-0.05081	1.38539	1.48682
3.04667	0.385646	1.26196	-0.05267	1.38527	1.48701
3.05	0.383243	1.26389	-0.05189	1.38778	1.48704
3.05333	0.384591	1.26858	-0.05179	1.38768	1.48683
3.05667	0.384993	1.27163	-0.05072	1.38752	1.48567
3.06	0.382481	1.2745	-0.05026	1.3854	1.4843
3.06333	0.384447	1.27774	-0.04752	1.38499	1.48284
3.06667	0.387403	1.28392	-0.04702	1.38479	1.48442
3.07	0.38573	1.28498	-0.0481	1.38633	1.48383
3.07333	0.389155	1.28636	-0.04786	1.38623	1.48371
3.07667	0.388966	1.28923	-0.04793	1.38637	1.48536
3.08	0.386996	1.29134	-0.04942	1.38673	1.48777
3.08333	0.382362	1.29328	-0.04857	1.38769	1.48713
3.08667	0.385341	1.29729	-0.04824	1.38674	1.48906
3.09	0.380085	1.30192	-0.04795	1.38718	1.48819
3.09333	0.381577	1.30528	-0.04798	1.38868	1.48942
3.09667	0.376241	1.30864	-0.04975	1.38868	1.48944
3.1	0.377727	1.31136	-0.05264	1.38691	1.48888
3.10333	0.37675	1.31222	-0.05179	1.38736	1.4881
3.10667	0.382196	1.31447	-0.05377	1.38736	1.48778
3.11	0.383893	1.31662	-0.05391	1.38645	1.48567
3.11333	0.38936	1.32119	-0.05168	1.38717	1.4857
3.11667	0.388587	1.32045	-0.0506	1.38787	1.48634
3.12	0.390877	1.3243	-0.0516	1.38683	1.48529
3.12333	0.390756	1.32672	-0.04836	1.38786	1.48558
3.12667	0.387324	1.32901	-0.04607	1.38894	1.48759
3.13	0.388825	1.33051	-0.04253	1.38856	1.48715
3.13333	0.393802	1.33367	-0.04044	1.38933	1.48767
3.13667	0.391071	1.3354	-0.03875	1.3912	1.48798
3.14	0.39344	1.33982	-0.0397	1.38919	1.48694
3.14333	0.398557	1.34391	-0.03956	1.38874	1.48634
3.14667	0.397935	1.34543	-0.04426	1.38795	1.48519
3.15	0.398642	1.34995	-0.04362	1.38829	1.48585
3.15333	0.399729	1.35622	-0.04369	1.38588	1.48455
3.15667	0.395122	1.35841	-0.04338	1.38594	1.48724
3.16	0.395904	1.35908	-0.04432	1.38548	1.48757
3.16333	0.400476	1.36414	-0.04292	1.38571	1.48788
3.16667	0.398558	1.36811	-0.0452	1.3837	1.48777
3.17	0.398769	1.36765	-0.04644	1.384	1.48888
3.17333	0.40511	1.37005	-0.04726	1.38469	1.48669
3.17667	0.401705	1.37441	-0.0467	1.38414	1.48547
3.18	0.402318	1.37668	-0.04654	1.38428	1.48644
3.18333	0.400926	1.37782	-0.04578	1.38585	1.48543
3.18667	0.401462	1.38271	-0.04489	1.38692	1.48624
3.19	0.394918	1.38436	-0.04468	1.38632	1.4881
3.19333	0.396105	1.38803	-0.0452	1.38575	1.48861
3.19667	0.393092	1.38963	-0.04628	1.3858	1.48979
3.2	0.392933	1.39312	-0.04844	1.38627	1.49136
3.20333	0.390751	1.39483	-0.0477	1.38553	1.49096
3.20667	0.393065	1.39648	-0.04537	1.38593	1.4907
3.21	0.395596	1.39863	-0.04483	1.38616	1.48952
3.21333	0.398851	1.40249	-0.0437	1.3858	1.48885
3.21667	0.402479	1.40646	-0.04099	1.38529	1.48744
3.22	0.404751	1.40839	-0.04065	1.38559	1.48608
3.22333	0.408498	1.41139	-0.04379	1.3864	1.48273
3.22667	0.406869	1.41305	-0.04473	1.38668	1.48483
3.23	0.405559	1.41884	-0.04348	1.38592	1.48737
3.23333	0.408078	1.41942	-0.04327	1.38632	1.487
3.23667	0.407177	1.42488	-0.04185	1.38752	1.48494
3.24	0.405295	1.42946	-0.04111	1.38698	1.48985
3.24333	0.408776	1.43098	-0.04177	1.38938	1.48691
3.24667	0.412669	1.42999	-0.04265	1.39057	1.48337
3.25	0.40935	1.43412	-0.04189	1.38977	1.48591
3.25333	0.411845	1.4335	-0.04155	1.38901	1.49115
3.25667	0.413845	1.43657	-0.04023	1.38906	1.48945
3.26	0.412334	1.44169	-0.0384	1.38812	1.49336
3.26333	0.408962	1.4451	-0.03844	1.38821	1.49455
3.26667	0.409593	1.44625	-0.04034	1.38834	1.49286
3.27	0.409727	1.45127	-0.04241	1.38886	1.49128
3.27333	0.409548	1.45309	-0.04363	1.38953	1.49123
3.27667	0.409131	1.4551	-0.04368	1.38912	1.48902
3.28	0.409958	1.46026	-0.04183	1.39032	1.48708
3.28333	0.410519	1.46546	-0.03937	1.39087	1.48647
3.28667	0.411454	1.46916	-0.03855	1.39216	1.4848
3.29	0.405757	1.47222	-0.03623	1.39132	1.48387
3.29333	0.403674	1.47414	-0.03684	1.39093	1.4814
3.29667	0.406557	1.4761	-0.03879	1.38915	1.48361
3.3	0.40376	1.47714	-0.04062	1.38909	1.48433
3.30333	0.404697	1.47924	-0.04076	1.38803	1.48451
3.30667	0.410289	1.4822	-0.04104	1.38919	1.48313
3.31	0.410467	1.48453	-0.03997	1.39024	1.48744
3.31333	0.405283	1.48901	-0.03981	1.39264	1.48687
3.31667	0.408595	1.49305	-0.03716	1.39284	1.4861
3.32	0.409597	1.49507	-0.03717	1.39275	1.48739
3.32333	0.411204	1.499	-0.03798	1.39175	1.4885
3.32667	0.413443	1.50381	-0.03941	1.39157	1.48571
3.33	0.41068	1.5069	-0.04043	1.3917	1.48666
3.33333	0.409039	1.50862	-0.03993	1.39174	1.48711
3.33667	0.405239	1.51002	-0.04004	1.39243	1.48587
3.34	0.404437	1.5109	-0.03856	1.39337	1.48632
3.34333	0.404937	1.51372	-0.0367	1.39328	1.48894
3.34667	0.409941	1.51534	-0.03577	1.39417	1.48921
3.35	0.410355	1.51761	-0.03892	1.3934	1.48798
3.35333	0.411705	1.52166	-0.03919	1.39233	1.48762
3.35667	0.407547	1.52591	-0.04024	1.39225	1.48467
3.36	0.407985	1.52785	-0.04185	1.39202	1.48637
3.36333	0.409153	1.52942	-0.04047	1.39056	1.48123
3.36667	0.404948	1.53201	-0.03896	1.39033	1.48298
3.37	0.401881	1.53374	-0.03901	1.3911	1.4847
3.37333	0.406938	1.53838	-0.03972	1.39091	1.48978
3.37667	0.410397	1.54172	-0.03992	1.38965	1.48622
3.38	0.412349	1.54539	-0.04189	1.38937	1.48821
3.38333	0.421743	1.55078	-0.04244	1.39013	1.48684
3.38667	0.429114	1.55531	-0.04232	1.39046	1.48599
3.39	0.425329	1.55576	-0.04155	1.38962	1.48486
3.39333	0.419303	1.5582	-0.04004	1.39008	1.48427
3.39667	0.415622	1.56402	-0.03686	1.38985	1.48594
3.4	0.415462	1.56645	-0.03777	1.38945	1.48709
3.40333	0.408747	1.56943	-0.03539	1.38808	1.48769
3.40667	0.410643	1.57169	-0.03306	1.38869	1.48627
3.41	0.410633	1.5749	-0.03199	1.38942	1.48499
3.41333	0.412132	1.57733	-0.03487	1.38845	1.48413
3.41667	0.410541	1.57729	-0.03368	1.38939	1.48438
3.42	0.416391	1.57848	-0.03582	1.39155	1.48677
3.42333	0.413593	1.58194	-0.03752	1.39006	1.48779
3.42667	0.414599	1.58421	-0.03792	1.38986	1.48834
3.43	0.417432	1.58576	-0.03516	1.39166	1.49088
3.43333	0.412554	1.58983	-0.03487	1.38909	1.48965
3.43667	0.406173	1.59303	-0.03581	1.38867	1.48672
3.44	0.409013	1.59754	-0.03632	1.3906	1.485
3.44333	0.410595	1.60109	-0.03574	1.39021	1.48627
3.44667	0.405873	1.60592	-0.03735	1.38959	1.48549
3.45	0.406655	1.61029	-0.03636	1.39063	1.48512
3.45333	0.40833	1.61482	-0.03364	1.39088	1.4831
3.45667	0.406078	1.61565	-0.03139	1.38906	1.48488
3.46	0.405604	1.61704	-0.03157	1.39004	1.48262
3.46333	0.40387	1.6182	-0.03103	1.38986	1.48099
3.46667	0.410972	1.62125	-0.0292	1.39044	1.48503
3.47	0.416095	1.62339	-0.02981	1.38982	1.48678
3.47333	0.421601	1.62683	-0.03138	1.3919	1.48592
3.47667	0.418812	1.62938	-0.03251	1.39127	1.4898
3.48	0.41772	1.63439	-0.0327	1.39045	1.49027
3.48333	0.412596	1.6358	-0.03344	1.39164	1.48702
3.48667	0.406729	1.63711	-0.03318	1.39091	1.48783
3.49	0.401052	1.63994	-0.03367	1.39047	1.48773
3.49333	0.404578	1.64607	-0.0332	1.39055	1.48671
3.49667	0.405359	1.64805	-0.03232	1.39164	1.48554
3.5	0.406367	1.65044	-0.03603	1.39091	1.48657
3.50333	0.412492	1.65624	-0.03669	1.39124	1.48571
3.50667	0.420406	1.66078	-0.03777	1.3918	1.48771
3.51	0.42039	1.66259	-0.03656	1.39171	1.48739
3.51333	0.421592	1.66617	-0.03763	1.3915	1.48802
3.51667	0.425439	1.67085	-0.03668	1.39099	1.48533
3.52	0.424685	1.67374	-0.0357	1.39106	1.48651
3.52333	0.419913	1.67599	-0.03467	1.39196	1.48557
3.52667	0.421103	1.68	-0.03684	1.39138	1.48561
3.53	0.421502	1.68163	-0.035	1.39146	1.48647
3.53333	0.422187	1.68213	-0.03552	1.39237	1.48822
3.53667	0.421312	1.68319	-0.03567	1.3931	1.48799
3.54	0.42128	1.68786	-0.03401	1.39184	1.48747
3.54333	0.422013	1.69029	-0.03307	1.39235	1.48635
3.54667	0.429268	1.69495	-0.03258	1.39104	1.48735
3.55	0.421865	1.70208	-0.03142	1.39211	1.48737
3.55333	0.423877	1.70594	-0.0311	1.39424	1.48665
3.55667	0.4221	1.70584	-0.03221	1.39402	1.48533
3.56	0.422926	1.70721	-0.03198	1.39494	1.4849
3.56333	0.417718	1.71058	-0.03398	1.39747	1.48487
3.56667	0.424499	1.71028	-0.03389	1.39728	1.48535
3.57	0.424879	1.71332	-0.03479	1.39593	1.48668
3.57333	0.430299	1.71588	-0.03537	1.39688	1.48867
3.57667	0.427757	1.71897	-0.03452	1.39646	1.48949
3.58	0.426943	1.72204	-0.03341	1.39596	1.48953
3.58333	0.42561	1.72555	-0.03324	1.39443	1.48866
3.58667	0.424427	1.72585	-0.03314	1.39434	1.48576
3.59	0.42043	1.72992	-0.0331	1.39376	1.48589
3.59333	0.422747	1.73406	-0.03151	1.39469	1.48825
3.59667	0.428003	1.73664	-0.03085	1.39407	1.48809
3.6	0.429005	1.74021	-0.02678	1.39574	1.48832
3.60333	0.426671	1.7457	-0.0251	1.39463	1.49134
3.60667	0.426659	1.74828	-0.02445	1.39533	1.49023
3.61	0.423904	1.75166	-0.02718	1.39555	1.48928
3.61333	0.421182	1.75599	-0.02992	1.39516	1.48874
3.61667	0.419851	1.75669	-0.03278	1.39457	1.48972
3.62	0.41985	1.75736	-0.03436	1.39559	1.48816
3.62333	0.425725	1.76029	-0.03445	1.39517	1.48907
3.62667	0.434425	1.76363	-0.03359	1.39411	1.48945
3.63	0.429693	1.76501	-0.03345	1.39521	1.49069
3.63333	0.429659	1.77082	-0.03481	1.39462	1.49015
3.63667	0.439379	1.77496	-0.03467	1.39395	1.49168
3.64	0.432289	1.77763	-0.03354	1.39364	1.49139
3.64333	0.427395	1.77911	-0.03464	1.39371	1.49087
3.64667	0.432746	1.78322	-0.03381	1.39283	1.49115
3.65	0.433634	1.78659	-0.03277	1.39251	1.49051
3.65333	0.430856	1.78939	-0.03464	1.39296	1.4901
3.65667	0.435588	1.79196	-0.03559	1.39426	1.49089
3.66	0.434011	1.79549	-0.03345	1.39464	1.49002
3.66333	0.438213	1.79845	-0.03276	1.39579	1.48687
3.66667	0.440314	1.80091	-0.03265	1.39615	1.48834
3.67	0.43527	1.80477	-0.03142	1.39493	1.48841
3.67333	0.43678	1.80871	-0.03083	1.39482	1.48644
3.67667	0.438256	1.8111	-0.02995	1.39495	1.48644
3.68	0.436921	1.81466	-0.02773	1.39423	1.48585
3.68333	0.436232	1.81623	-0.02808	1.39455	1.48659
3.68667	0.439028	1.81856	-0.02773	1.39653	1.48583
3.69	0.435254	1.81988	-0.02711	1.39478	1.48784
3.69333	0.435593	1.82279	-0.03046	1.39395	1.48697
3.69667	0.434032	1.82485	-0.02989	1.3935	1.48927
3.7	0.432579	1.8294	-0.03013	1.39254	1.48871
3.70333	0.432164	1.83237	-0.0289	1.39245	1.48747
3.70667	0.434054	1.83632	-0.02741	1.39198	1.48441
3.71	0.434877	1.83935	-0.02632	1.39182	1.48564
3.71333	0.435805	1.8437	-0.03043	1.39272	1.48565
3.71667	0.431303	1.84441	-0.02907	1.39398	1.48465
3.72	0.432801	1.84861	-0.02812	1.39275	1.48378
3.72333	0.433451	1.85266	-0.03006	1.394	1.48344
3.72667	0.436737	1.85478	-0.02835	1.39387	1.48337
3.73	0.437451	1.85903	-0.02656	1.39381	1.48388
3.73333	0.442801	1.86258	-0.0286	1.39349	1.48186
3.73667	0.438686	1.86392	-0.02984	1.394	1.48232
3.74	0.44377	1.86723	-0.02951	1.39296	1.4856
3.74333	0.44225	1.87136	-0.0303	1.39432	1.48555
3.74667	0.443155	1.87087	-0.03086	1.39563	1.48279
3.75	0.441725	1.87601	-0.02991	1.39545	1.48325
3.75333	0.447393	1.88043	-0.03001	1.39754	1.48604
3.75667	0.444429	1.88173	-0.0304	1.39946	1.48489
3.76	0.443251	1.88634	-0.02818	1.40065	1.48568
3.76333	0.439793	1.89187	-0.02752	1.39887	1.48781
3.76667	0.446238	1.8928	-0.027	1.39971	1.4889
3.77	0.44233	1.89502	-0.02385	1.39712	1.48793
3.77333	0.442391	1.89873	-0.0221	1.39622	1.48856
3.77667	0.437509	1.89779	-0.02386	1.39587	1.48715
3.78	0.442383	1.89842	-0.02327	1.39599	1.485
3.78333	0.440652	1.90241	-0.02108	1.39579	1.48635
3.78667	0.441289	1.90602	-0.02257	1.39685	1.48461
3.79	0.437614	1.90855	-0.02124	1.39549	1.48559
3.79333	0.439834	1.91123	-0.01905	1.39475	1.48405
3.79667	0.436719	1.9168	-0.01941	1.39597	1.48713
3.8	0.434482	1.91944	-0.02082	1.39609	1.48538
3.80333	0.432683	1.92135	-0.02146	1.3959	1.48796
3.80667	0.435819	1.9247	-0.02414	1.39806	1.48764
3.81	0.439104	1.92917	-0.0265	1.39823	1.48955
3.81333	0.443261	1.92941	-0.02635	1.39721	1.48922
3.81667	0.44677	1.93395	-0.02499	1.39608	1.48951
3.82	0.447603	1.93646	-0.02514	1.3972	1.48786
3.82333	0.45004	1.93896	-0.02443	1.3958	1.48673
3.82667	0.449997	1.94248	-0.02299	1.39448	1.48633
3.83	0.449604	1.94667	-0.02169	1.39417	1.48629
3.83333	0.444481	1.95005	-0.02323	1.3946	1.48786
3.83667	0.449983	1.95245	-0.02382	1.3917	1.4877
3.84	0.451453	1.95595	-0.02266	1.39326	1.48662
3.84333	0.452969	1.95906	-0.02186	1.39347	1.48685
3.84667	0.451978	1.96275	-0.02329	1.39477	1.4843
3.85	0.457831	1.96526	-0.02402	1.39566	1.48262
3.85333	0.456372	1.96856	-0.02261	1.39586	1.48245
3.85667	0.453419	1.97227	-0.02258	1.39534	1.48354
3.86	0.448543	1.97391	-0.02213	1.39663	1.48489
3.86333	0.443143	1.97728	-0.02114	1.39539	1.48677
3.86667	0.444179	1.98059	-0.01677	1.39446	1.4862
3.87	0.441426	1.98522	-0.01675	1.39637	1.48573
3.87333	0.439643	1.9868	-0.01662	1.39515	1.48639
3.87667	0.439962	1.98983	-0.01697	1.39401	1.48459
3.88	0.445793	1.9929	-0.017	1.39436	1.48415
3.88333	0.443788	1.99631	-0.01924	1.39392	1.48508
3.88667	0.444528	1.99625	-0.01746	1.3934	1.4877
3.89	0.447246	2.00158	-0.01783	1.39514	1.48952
3.89333	0.453073	2.00447	-0.01899	1.39528	1.49201
3.89667	0.454028	2.00577	-0.01833	1.39608	1.49333
3.9	0.453839	2.01032	-0.01878	1.39745	1.49515
3.90333	0.451858	2.01632	-0.02176	1.39745	1.49385
3.90667	0.453638	2.01714	-0.02246	1.39705	1.49133
3.91	0.453543	2.02137	-0.02201	1.39746	1.48986
3.91333	0.453232	2.02437	-0.02228	1.39701	1.48845
3.91667	0.45327	2.02488	-0.01967	1.39622	1.48867
3.92	0.45673	2.02621	-0.01842	1.39694	1.49009
3.92333	0.459978	2.02906	-0.01764	1.39701	1.49196
3.92667	0.460083	2.03101	-0.01769	1.39627	1.49077
3.93	0.462153	2.03498	-0.01788	1.39813	1.4897
3.93333	0.460273	2.0392	-0.02058	1.39766	1.48939
3.93667	0.460612	2.04532	-0.02179	1.39631	1.48868
3.94	0.459021	2.04979	-0.02204	1.39678	1.48041
3.94333	0.457157	2.05479	-0.02302	1.39845	1.48448
3.94667	0.456857	2.05768	-0.02158	1.39697	1.4828
3.95	0.459355	2.06143	-0.01793	1.39635	1.48558
3.95333	0.463088	2.06251	-0.01525	1.39717	1.48425
3.95667	0.462963	2.06339	-0.01392	1.39542	1.49123
3.96	0.466168	2.066	-0.01243	1.39334	1.48905
3.96333	0.46358	2.0697	-0.01291	1.39257	1.49365
3.96667	0.466386	2.07059	-0.01716	1.39412	1.48783
3.97	0.463675	2.07289	-0.01911	1.39294	1.48888
3.97333	0.45969	2.07727	-0.02063	1.39577	1.48706
3.97667	0.459751	2.07784	-0.0205	1.39744	1.48836
3.98	0.463405	2.07994	-0.02259	1.39717	1.48709
3.98333	0.462377	2.08314	-0.01965	1.39649	1.4885
3.98667	0.466044	2.08515	-0.01857	1.39879	1.48773
3.99	0.469764	2.08713	-0.01855	1.39816	1.48769
3.99333	0.469284	2.09184	-0.01792	1.39681	1.48563
3.99667	0.465807	2.09434	-0.01557	1.39776	1.48487
4	0.467365	2.09822	-0.01812	1.39877	1.48471
4.00333	0.467481	2.10269	-0.0175	1.39703	1.48543
4.00667	0.470903	2.10756	-0.0155	1.39582	1.48785
4.01	0.469399	2.11054	-0.01571	1.39775	1.48685
4.01333	0.469191	2.11361	-0.01679	1.39822	1.48649
4.01667	0.469341	2.12041	-0.01641	1.39893	1.4838
4.02	0.465625	2.12511	-0.01735	1.39876	1.48388
4.02333	0.458964	2.12729	-0.01917	1.39982	1.48267
4.02667	0.458327	2.12966	-0.02017	1.39669	1.4836
4.03	0.462075	2.13309	-0.01837	1.39587	1.4834
4.03333	0.464246	2.13292	-0.01836	1.394	1.48666
4.03667	0.467414	2.13473	-0.01942	1.3946	1.48283
4.04	0.470609	2.13746	-0.01889	1.39345	1.48163
4.04333	0.474394	2.13978	-0.01837	1.39665	1.4844
4.04667	0.47563	2.14479	-0.01929	1.3975	1.48604
4.05	0.470625	2.14843	-0.01949	1.39826	1.48396
4.05333	0.468156	2.1517	-0.01764	1.39783	1.48628
4.05667	0.471192	2.15229	-0.01923	1.3963	1.48898
4.06	0.470914	2.15667	-0.02054	1.39414	1.48488
4.06333	0.468153	2.15722	-0.01999	1.39324	1.4846
4.06667	0.466159	2.1605	-0.01926	1.39207	1.48482
4.07	0.468426	2.16363	-0.01924	1.39307	1.48531
4.07333	0.470464	2.16789	-0.019	1.39518	1.48405
4.07667	0.472265	2.17184	-0.01727	1.39689	1.48653
4.08	0.475761	2.17514	-0.0182	1.3971	1.48819
4.08333	0.479618	2.17718	-0.01785	1.39813	1.49031
4.08667	0.47998	2.17968	-0.019	1.39823	1.48937
4.09	0.477574	2.18383	-0.01857	1.39773	1.48973
4.09333	0.475336	2.18571	-0.01864	1.39704	1.48926
4.09667	0.475104	2.18945	-0.02034	1.39684	1.4903
4.1	0.476733	2.19327	-0.02006	1.39763	1.49023
4.10333	0.476421	2.19458	-0.01863	1.3964	1.49176
4.10667	0.475823	2.19577	-0.01755	1.3967	1.49155
4.11	0.475889	2.19973	-0.01901	1.39659	1.49
4.11333	0.474641	2.20092	-0.01702	1.39707	1.48594
4.11667	0.470742	2.20548	-0.01563	1.39849	1.48622
4.12	0.472045	2.2084	-0.01849	1.399	1.48254
4.12333	0.474101	2.21222	-0.01882	1.39975	1.48451
4.12667	0.477455	2.21431	-0.01861	1.39974	1.48532
4.13	0.476204	2.21726	-0.0181	1.39964	1.48918
4.13333	0.479963	2.21937	-0.0196	1.3982	1.48652
4.13667	0.482193	2.2223	-0.0174	1.39813	1.48999
4.14	0.474767	2.22648	-0.01569	1.39654	1.48841
4.14333	0.470419	2.22952	-0.01536	1.3972	1.48833
4.14667	0.470768	2.23307	-0.01552	1.39683	1.48473
4.15	0.467618	2.23734	-0.01258	1.39521	1.48637
4.15333	0.464963	2.24171	-0.01174	1.39476	1.48586
4.15667	0.469276	2.24398	-0.01419	1.39523	1.48546
4.16	0.469679	2.24669	-0.01249	1.39435	1.48694
4.16333	0.471649	2.24997	-0.01304	1.3938	1.48749
4.16667	0.473146	2.2526	-0.01692	1.39534	1.48701
4.17	0.469407	2.25593	-0.01659	1.39637	1.48606
4.17333	0.472414	2.25617	-0.01519	1.39566	1.48165
4.17667	0.476587	2.25831	-0.01693	1.39566	1.47935
4.18	0.474811	2.26193	-0.01733	1.39585	1.4811
4.18333	0.475881	2.26334	-0.01481	1.39669	1.48266
4.18667	0.483795	2.26465	-0.01536	1.39538	1.48206
4.19	0.480624	2.27071	-0.01512	1.39701	1.4864
4.19333	0.479568	2.27571	-0.01464	1.39764	1.48652
4.19667	0.4812	2.27709	-0.01215	1.39887	1.48409
4.2	0.478403	2.28244	-0.01283	1.39644	1.48218
4.20333	0.477515	2.28663	-0.0129	1.39822	1.48674
4.20667	0.481484	2.2899	-0.01274	1.39713	1.48516
4.21	0.482083	2.29269	-0.01119	1.3959	1.48455
4.21333	0.487968	2.29709	-0.01255	1.39621	1.48246
4.21667	0.496053	2.30086	-0.00967	1.39613	1.48287
4.22	0.493236	2.30378	-0.00946	1.39527	1.48218
4.22333	0.495759	2.30696	-0.00896	1.3967	1.48361
4.22667	0.498104	2.30748	-0.01025	1.39762	1.48632
4.23	0.492805	2.31026	-0.00977	1.39707	1.48942
4.23333	0.48819	2.31033	-0.012	1.39781	1.48924
4.23667	0.490798	2.31226	-0.01096	1.39796	1.48823
4.24	0.490403	2.31608	-0.01329	1.39832	1.48853
4.24333	0.486691	2.31998	-0.01228	1.39916	1.48786
4.24667	0.488072	2.32183	-0.01264	1.39963	1.48773
4.25	0.486567	2.32824	-0.01182	1.40003	1.48824
4.25333	0.486417	2.33134	-0.01574	1.39923	1.48863
4.25667	0.482638	2.33268	-0.01389	1.39904	1.48897
4.26	0.479605	2.33385	-0.01379	1.39885	1.48631
4.26333	0.478754	2.33826	-0.01316	1.39956	1.48723
4.26667	0.481023	2.3401	-0.01682	1.40059	1.48693
4.27	0.481427	2.34304	-0.0145	1.40181	1.48664
4.27333	0.481972	2.34493	-0.01378	1.40112	1.48829
4.27667	0.484416	2.34948	-0.01427	1.40072	1.48801
4.28	0.488098	2.35187	-0.016	1.39929	1.48264
4.28333	0.492016	2.35584	-0.01341	1.39929	1.48442
4.28667	0.490912	2.35987	-0.01205	1.39695	1.48558
4.29	0.490939	2.36515	-0.01207	1.39725	1.48222
4.29333	0.492234	2.36976	-0.01138	1.39743	1.48383
4.29667	0.491991	2.3711	-0.01036	1.39803	1.48849
4.3	0.491734	2.37348	-0.01053	1.39751	1.48777
4.30333	0.491063	2.37466	-0.01002	1.39883	1.48561
4.30667	0.493	2.37409	-0.01107	1.39888	1.48351
4.31	0.49361	2.37556	-0.01164	1.39827	1.48674
4.31333	0.495352	2.37936	-0.00975	1.3986	1.48689
4.31667	0.493981	2.38283	-0.00955	1.3974	1.4873
4.32	0.49578	2.38569	-0.01157	1.39806	1.48745
4.32333	0.499124	2.39048	-0.00967	1.39786	1.48686
4.32667	0.500532	2.39381	-0.00781	1.39738	1.48559
4.33	0.496762	2.39744	-0.00869	1.39607	1.48853
4.33333	0.50098	2.39963	-0.00893	1.39794	1.48586
4.33667	0.502405	2.40425	-0.00826	1.39712	1.48493
4.34	0.500562	2.40723	-0.00839	1.39692	1.48913
4.34333	0.500035	2.41023	-0.00931	1.39732	1.48611
4.34667	0.498097	2.41125	-0.01092	1.39724	1.48388
4.35	0.495167	2.41551	-0.01014	1.39767	1.48501
4.35333	0.494187	2.41877	-0.00998	1.39778	1.48459
4.35667	0.492586	2.42118	-0.01106	1.39812	1.48587
4.36	0.490419	2.42525	-0.01186	1.39913	1.48728
4.36333	0.492795	2.4309	-0.01103	1.40003	1.48505
4.36667	0.494313	2.43244	-0.01296	1.39756	1.4854
4.37	0.493338	2.43604	-0.01181	1.39776	1.48888
4.37333	0.498793	2.44146	-0.01013	1.39746	1.48724
4.37667	0.503296	2.44366	-0.01113	1.39824	1.48863
4.38	0.503332	2.44479	-0.01114	1.39784	1.49088
4.38333	0.498926	2.45058	-0.0075	1.39702	1.4897
4.38667	0.500707	2.45425	-0.00766	1.39707	1.48664
4.39	0.494129	2.4564	-0.01047	1.39779	1.48734
4.39333	0.49127	2.45926	-0.01001	1.39679	1.48541
4.39667	0.493789	2.46472	-0.00911	1.39678	1.48118
4.4	0.499279	2.46657	-0.01171	1.39878	1.48174
4.40333	0.496017	2.46777	-0.01156	1.39987	1.4858
4.40667	0.49855	2.47043	-0.01055	1.39946	1.486
4.41	0.499849	2.47374	-0.00843	1.39981	1.48555
4.41333	0.496806	2.47533	-0.00727	1.39916	1.49085
4.41667	0.493592	2.47766	-0.00745	1.39982	1.49169
4.42	0.496445	2.48152	-0.00873	1.39987	1.49002
4.42333	0.495269	2.48147	-0.0073	1.40076	1.488
4.42667	0.494146	2.48242	-0.00841	1.40027	1.48499
4.43	0.494669	2.48463	-0.00916	1.4014	1.48241
4.43333	0.495069	2.48909	-0.00797	1.4003	1.48186
4.43667	0.493666	2.49002	-0.00599	1.39862	1.48081
4.44	0.497941	2.49553	-0.00567	1.39664	1.48448
4.44333	0.501213	2.49845	-0.0058	1.39545	1.48651
4.44667	0.500609	2.50069	-0.00463	1.39566	1.48546
4.45	0.498355	2.504	-0.0032	1.39522	1.48248
4.45333	0.503012	2.50681	-0.00235	1.39646	1.48599
4.45667	0.496516	2.50951	-0.00235	1.39774	1.48348
4.46	0.498286	2.51386	-0.00098	1.39839	1.48845
4.46333	0.501205	2.51762	-0.0023	1.3984	1.49139
4.46667	0.506658	2.51931	-0.00355	1.39835	1.4938
4.47	0.504605	2.52303	-0.00441	1.39902	1.48972
4.47333	0.512	2.5257	-0.00476	1.39779	1.48963
4.47667	0.51178	2.52895	-0.00534	1.39893	1.48799
4.48	0.512041	2.53025	-0.00587	1.39787	1.48633
4.48333	0.512915	2.5346	-0.00583	1.3988	1.48607
4.48667	0.518915	2.53787	-0.00644	1.39831	1.4872
4.49	0.514657	2.54054	-0.00749	1.39848	1.48624
4.49333	0.513557	2.54103	-0.00765	1.39776	1.48412
4.49667	0.517635	2.54699	-0.00595	1.39818	1.48637
4.5	0.519079	2.54737	-0.00585	1.39789	1.48696
4.50333	0.511236	2.54995	-0.00588	1.39726	1.48692
4.50667	0.515413	2.55135	-0.00411	1.39747	1.48817
4.51	0.518264	2.55661	-0.00525	1.3968	1.49099
4.51333	0.517866	2.55869	-0.00528	1.39715	1.48929
4.51667	0.515492	2.56413	-0.00588	1.39697	1.49
4.52	0.520323	2.56729	-0.00557	1.39586	1.48966
4.52333	0.521531	2.57218	-0.00702	1.39544	1.48897
4.52667	0.520842	2.57356	-0.00481	1.39842	1.487
4.53	0.51864	2.57582	-0.00551	1.39891	1.48697
4.53333	0.519312	2.58096	-0.00284	1.39763	1.48706
4.53667	0.522479	2.58566	-0.00226	1.39955	1.48735
4.54	0.51717	2.58624	-0.00202	1.40035	1.48912
4.54333	0.51522	2.58918	-0.00288	1.39865	1.4896
4.54667	0.51257	2.59343	-0.00197	1.39851	1.48713
4.55	0.510814	2.59486	-0.00441	1.40006	1.48535
4.55333	0.50332	2.5949	-0.00607	1.4001	1.48447
4.55667	0.505978	2.59895	-0.00672	1.39843	1.48479
4.56	0.510725	2.60214	-0.008	1.39689	1.48243
4.56333	0.514866	2.6045	-0.00948	1.39605	1.48448
4.56667	0.517426	2.60601	-0.0098	1.39579	1.48667
4.57	0.52118	2.61077	-0.00919	1.39488	1.48593
4.57333	0.524103	2.61328	-0.00947	1.39598	1.48158
4.57667	0.522506	2.61644	-0.00867	1.39783	1.48357
4.58	0.523002	2.61963	-0.00682	1.39778	1.48467
4.58333	0.524216	2.62557	-0.00576	1.39787	1.48271
4.58667	0.526773	2.62823	-0.00483	1.39796	1.48269
4.59	0.524172	2.63158	-0.00376	1.39952	1.48472
4.59333	0.517995	2.63454	-0.00258	1.39856	1.48371
4.59667	0.516058	2.63715	-0.00163	1.39844	1.48327
4.6	0.515347	2.63601	-0.00105	1.39859	1.48308
4.60333	0.50935	2.64014	-0.00127	1.39879	1.48463
4.60667	0.511809	2.64334	0.000845	1.39773	1.48492
4.61	0.516328	2.64917	0.00068	1.39804	1.48574
4.61333	0.517534	2.65234	0.000128	1.396	1.48556
4.61667	0.515114	2.6568	-0.00024	1.39674	1.48771
4.62	0.520335	2.6578	3.23e-05	1.39752	1.48758
4.62333	0.515476	2.66062	-0.00202	1.39733	1.49006
4.62667	0.513044	2.65977	-0.00147	1.39707	1.48976
4.63	0.512353	2.66206	-0.00262	1.39931	1.49027
4.63333	0.513977	2.66617	-0.00217	1.39861	1.49147
4.63667	0.511247	2.67003	-0.00228	1.39802	1.49088
4.64	0.520108	2.67414	-0.00148	1.39765	1.48924
4.64333	0.523812	2.67893	-0.00061	1.3975	1.48988
4.64667	0.524834	2.68053	0.000723	1.39752	1.48359
4.65	0.527003	2.68466	0.001331	1.39667	1.48204
4.65333	0.534985	2.6891	0.000961	1.39635	1.48464
4.65667	0.530679	2.6925	0.000481	1.39821	1.48288
4.66	0.533145	2.69584	-5.4e-05	1.39764	1.48209
4.66333	0.536636	2.70166	-0.0017	1.39769	1.48642
4.66667	0.535331	2.70369	-0.00208	1.39798	1.48733
4.67	0.526923	2.70573	-0.0018	1.39747	1.48775
4.67333	0.528169	2.70825	-0.00141	1.39653	1.48585
4.67667	0.527061	2.71037	-0.00144	1.39671	1.4873
4.68	0.529159	2.71245	-0.00136	1.39753	1.49158
4.68333	0.530039	2.71536	-0.00187	1.3969	1.48881
4.68667	0.535403	2.71679	-0.00054	1.39784	1.48704
4.69	0.534968	2.7178	-0.00103	1.39894	1.48824
4.69333	0.537394	2.7211	-0.00224	1.39843	1.48798
4.69667	0.534636	2.72326	-0.00141	1.39823	1.48493
4.7	0.537694	2.72405	-0.00219	1.39951	1.48671
4.70333	0.538265	2.72876	-0.00279	1.3981	1.48583
4.70667	0.53475	2.73329	-0.00152	1.39688	1.48789
4.71	0.526892	2.73533	-0.00055	1.39789	1.48761
4.71333	0.529157	2.73945	-0.00098	1.39693	1.48781
4.71667	0.529312	2.74508	0.00034	1.39571	1.48692
4.72	0.530603	2.74896	-0.00068	1.39589	1.48641
4.72333	0.538401	2.75341	-0.00197	1.396	1.4864
4.72667	0.545933	2.75891	-0.00083	1.39688	1.4857
4.73	0.545621	2.76082	-0.00014	1.39635	1.48587
4.73333	0.545341	2.76151	0.000296	1.39664	1.48688
4.73667	0.543891	2.76553	0.000538	1.39677	1.48902
4.74	0.538855	2.76813	0.002014	1.39693	1.4873
4.74333	0.533528	2.77026	0.002711	1.39562	1.48699
4.74667	0.532727	2.77239	0.004443	1.39602	1.48458
4.75	0.530198	2.77724	0.00631	1.39708	1.4845
4.75333	0.528869	2.7793	0.007299	1.39754	1.48271
4.75667	0.533659	2.78343	0.006557	1.39705	1.48603
4.76	0.541211	2.78422	0.006238	1.39694	1.4865
4.76333	0.541692	2.78775	0.004461	1.3977	1.4888
4.76667	0.545013	2.78997	0.001965	1.39757	1.4876
4.77	0.549244	2.79239	0.003736	1.39713	1.48699
4.77333	0.545834	2.79259	0.003542	1.39778	1.48551
4.77667	0.541355	2.79666	0.00245	1.39755	1.48535
4.78	0.538701	2.79955	0.003074	1.39728	1.4817
4.78333	0.53624	2.80274	0.004905	1.39682	1.48077
4.78667	0.53641	2.80574	0.003338	1.39737	1.48211
4.79	0.535163	2.80898	0.00411	1.3968	1.48141
4.79333	0.534395	2.81249	0.006247	1.39694	1.47989
4.79667	0.535388	2.81483	0.007819	1.39728	1.48345
4.8	0.537141	2.81668	0.009069	1.39828	1.48515
4.80333	0.534298	2.81872	0.008774	1.39837	1.48515
4.80667	0.537068	2.82098	0.007212	1.39881	1.48658
4.81	0.543569	2.82347	0.005493	1.39891	1.48978
4.81333	0.548433	2.82754	0.004323	1.39961	1.48869
4.81667	0.549328	2.83168	0.000701	1.39824	1.48986
4.82	0.550464	2.8363	0.001153	1.39792	1.4896
4.82333	0.547437	2.84051	0.004258	1.3969	1.48898
4.82667	0.542162	2.84177	0.005009	1.39694	1.48542
4.83	0.541073	2.84296	0.005816	1.39557	1.48665
4.83333	0.542196	2.84503	0.006791	1.39546	1.48614
4.83667	0.544399	2.8465	0.006742	1.3955	1.48489
4.84	0.55032	2.84717	0.007416	1.39531	1.48118
4.84333	0.552405	2.84928	0.007564	1.39643	1.48202
4.84667	0.554155	2.85293	0.006959	1.39671	1.47989
4.85	0.552426	2.85553	0.006357	1.39711	1.47771
4.85333	0.54822	2.85779	0.008094	1.39855	1.4799
4.85667	0.547173	2.86012	0.006765	1.3991	1.48552
4.86	0.547967	2.8647	0.005917	1.39861	1.48777
4.86333	0.542207	2.86637	0.004365	1.40034	1.48934
4.86667	0.542843	2.86677	0.005656	1.40141	1.49171
4.87	0.548135	2.87063	0.004033	1.40109	1.49137
4.87333	0.547947	2.87578	0.003418	1.40154	1.48802
4.87667	0.546354	2.87731	0.00365	1.40218	1.48728
4.88	0.552136	2.88074	0.005042	1.40066	1.48658
4.88333	0.548822	2.88625	0.005228	1.3995	1.48593
4.88667	0.5501	2.88882	0.005269	1.39778	1.48422
4.89	0.546157	2.88936	0.006993	1.39894	1.48484
4.89333	0.54905	2.89293	0.007923	1.39864	1.48512
4.89667	0.548605	2.89531	0.006969	1.39852	1.48437
4.9	0.555092	2.89696	0.005638	1.39882	1.48492
4.90333	0.552601	2.90368	0.005622	1.39865	1.48481
4.90667	0.557263	2.90677	0.004547	1.39713	1.4811
4.91	0.559316	2.9093	0.00399	1.39716	1.48335
4.91333	0.553807	2.91301	0.004601	1.39673	1.48619
4.91667	0.551638	2.91702	0.006123	1.39751	1.48593
4.92	0.552605	2.91652	0.0083	1.39932	1.48615
4.92333	0.553356	2.9194	0.009051	1.39917	1.48909
4.92667	0.547574	2.92297	0.009728	1.39888	1.4849
4.93	0.553084	2.92595	0.009774	1.39971	1.48551
4.93333	0.554796	2.92882	0.007726	1.39899	1.48326
4.93667	0.55436	2.93148	0.006018	1.39765	1.4818
4.94	0.552999	2.93436	0.006349	1.39824	1.48212
4.94333	0.554019	2.93599	0.004514	1.39768	1.48517
4.94667	0.552935	2.93694	0.004679	1.39694	1.48054
4.95	0.549128	2.93851	0.005727	1.39661	1.47888
4.95333	0.552031	2.94411	0.008632	1.39885	1.48175
4.95667	0.552438	2.94872	0.007206	1.39806	1.48391
4.96	0.554695	2.95247	0.008835	1.39834	1.4833
4.96333	0.554501	2.9566	0.009549	1.39829	1.48722
4.96667	0.554482	2.9601	0.010656	1.39878	1.49049
4.97	0.549719	2.96103	0.008284	1.39528	1.49164
4.97333	0.550812	2.96374	0.00849	1.39613	1.4901
4.97667	0.554317	2.96609	0.00816	1.39549	1.49075
4.98	0.557066	2.9682	0.007462	1.39516	1.48957
4.98333	0.559996	2.97112	0.006755	1.39414	1.49019
4.98667	0.5598	2.97427	0.007414	1.3958	1.48918
4.99	0.5615	2.97572	0.00755	1.3959	1.4887
4.99333	0.560479	2.97884	0.007387	1.39714	1.48575
4.99667	0.55468	2.98283	0.006944	1.39751	1.48355
5	0.553118	2.98461	0.006214	1.39934	1.48336
5.00333	0.55471	2.98953	0.00628	1.39952	1.48384
5.00667	0.554092	2.99267	0.005059	1.39905	1.48502
5.01	0.55278	2.99545	0.005312	1.3987	1.48543
5.01333	0.555762	2.99739	0.005831	1.40063	1.484
5.01667	0.55821	3.00109	0.009356	1.39906	1.48248
5.02	0.56016	3.0034	0.007374	1.39674	1.48021
5.02333	0.558605	3.00605	0.010239	1.39605	1.47704
5.02667	0.561801	3.00723	0.010558	1.39481	1.47917
5.03	0.562368	3.00834	0.011086	1.39326	1.48099
5.03333	0.562923	3.01136	0.009475	1.39365	1.48028
5.03667	0.564037	3.01321	0.01322	1.39562	1.48171
5.04	0.562618	3.01639	0.012079	1.39756	1.4841
5.04333	0.561203	3.01885	0.01166	1.39832	1.48377
5.04667	0.561803	3.02401	0.012555	1.39786	1.48538
5.05	0.560328	3.02526	0.011175	1.39835	1.48761
5.05333	0.558703	3.02809	0.00931	1.39757	1.48561
5.05667	0.566301	3.02965	0.008784	1.39706	1.48541
5.06	0.568907	3.03298	0.00836	1.39676	1.48323
5.06333	0.569654	3.03504	0.00737	1.39662	1.48358
5.06667	0.575948	3.03946	0.008539	1.39615	1.48281
5.07	0.577519	3.04323	0.010281	1.39796	1.48514
5.07333	0.574959	3.04681	0.011011	1.39641	1.4809
5.07667	0.569525	3.05231	0.01015	1.39667	1.47896
5.08	0.569852	3.05506	0.011706	1.39775	1.47876
5.08333	0.562711	3.05632	0.011873	1.39797	1.48061
5.08667	0.563226	3.05817	0.010963	1.39693	1.48044
5.09	0.564134	3.06053	0.01261	1.39722	1.48412
5.09333	0.5705	3.06154	0.012804	1.3979	1.48631
5.09667	0.569439	3.06425	0.011225	1.39694	1.48676
5.1	0.571046	3.06604	0.012423	1.39832	1.48477
5.10333	0.571379	3.07079	0.009702	1.39795	1.48434
5.10667	0.56911	3.07322	0.010377	1.39829	1.48342
5.11	0.569633	3.07575	0.013215	1.39685	1.48379
5.11333	0.573757	3.07653	0.013127	1.39685	1.48422
5.11667	0.571914	3.08074	0.012018	1.39374	1.48421
5.12	0.575047	3.08342	0.014869	1.39346	1.48285
5.12333	0.579189	3.08627	0.0124	1.39378	1.48534
5.12667	0.577381	3.08668	0.009834	1.39371	1.48412
5.13	0.574283	3.09132	0.008809	1.39366	1.48321
5.13333	0.577235	3.09442	0.009454	1.39497	1.48329
5.13667	0.574347	3.09715	0.009218	1.39588	1.48323
5.14	0.570511	3.09977	0.008603	1.39447	1.48299
5.14333	0.568506	3.10472	0.009568	1.39469	1.48353
5.14667	0.56944	3.1071	0.012071	1.39383	1.48184
5.15	0.571628	3.11015	0.011708	1.39448	1.48247
5.15333	0.571013	3.11308	0.009811	1.39384	1.48444
5.15667	0.573408	3.11366	0.011247	1.39625	1.48069
5.16	0.574749	3.1166	0.009956	1.39672	1.47972
5.16333	0.578842	3.12045	0.008308	1.39737	1.4832
5.16667	0.582501	3.12317	0.008623	1.39624	1.48192
5.17	0.585748	3.12505	0.011683	1.39689	1.48016
5.17333	0.588527	3.13006	0.011474	1.39544	1.48231
5.17667	0.590808	3.13181	0.013414	1.39475	1.48286
5.18	0.590788	3.1341	0.015498	1.39584	1.4808
5.18333	0.588411	3.13501	0.01649	1.39712	1.48129
5.18667	0.587166	3.13793	0.017421	1.39662	1.48169
5.19	0.58625	3.14214	0.019001	1.39756	1.48399
5.19333	0.589236	3.14679	0.019408	1.39888	1.48491
5.19667	0.59044	3.14837	0.018024	1.39769	1.48466
5.2	0.590884	3.15156	0.018881	1.39619	1.48536
5.20333	0.593639	3.1555	0.017401	1.39651	1.48507
5.20667	0.593165	3.1552	0.016031	1.39568	1.48292
5.21	0.593155	3.15765	0.014626	1.39554	1.48355
5.21333	0.59388	3.16032	0.015189	1.39553	1.48386
5.21667	0.592333	3.16305	0.013272	1.39543	1.4831
5.22	0.594361	3.16397	0.010845	1.39602	1.48331
5.22333	0.593566	3.16908	0.01205	1.39705	1.48688
5.22667	0.588864	3.16967	0.012931	1.39573	1.48649
5.23	0.583705	3.17327	0.015083	1.39673	1.48666
5.23333	0.581847	3.17672	0.01615	1.39778	1.4858
5.23667	0.577668	3.18079	0.016807	1.39779	1.4841
5.24	0.576319	3.18394	0.016431	1.39735	1.47917
5.24333	0.578028	3.18581	0.017989	1.39784	1.48053
5.24667	0.577651	3.18849	0.017405	1.39687	1.48245
5.25	0.580565	3.19177	0.016542	1.39423	1.48323
5.25333	0.584762	3.19655	0.017185	1.39367	1.48534
5.25667	0.589695	3.1985	0.018022	1.39303	1.48687
5.26	0.588616	3.20311	0.017766	1.39357	1.48527
5.26333	0.590854	3.20329	0.016039	1.39336	1.48171
5.26667	0.589461	3.2066	0.017433	1.39582	1.48358
5.27	0.585018	3.20947	0.020641	1.39611	1.48369
5.27333	0.582041	3.20863	0.020476	1.39679	1.48342
5.27667	0.583186	3.21055	0.021394	1.39671	1.47865
5.28	0.581366	3.21576	0.021956	1.39889	1.47972
5.28333	0.584339	3.21723	0.02046	1.39916	1.4766
5.28667	0.587357	3.21678	0.017905	1.39897	1.47333
5.29	0.589178	3.22267	0.01688	1.39836	1.47606
5.29333	0.591281	3.22659	0.01599	1.39781	1.48123
5.29667	0.595641	3.22932	0.016596	1.39648	1.48095
5.3	0.599049	3.23202	0.016018	1.39475	1.47983
5.30333	0.600431	3.23459	0.01434	1.39481	1.4832
5.30667	0.598425	3.23655	0.014334	1.39491	1.48185
5.31	0.599038	3.24087	0.013639	1.39707	1.48256
5.31333	0.594558	3.24461	0.013098	1.39768	1.48452
5.31667	0.59408	3.24683	0.013948	1.40026	1.48774
5.32	0.595631	3.25142	0.015341	1.40017	1.4881
5.32333	0.598159	3.2554	0.014694	1.39902	1.48597
5.32667	0.598809	3.25357	0.016101	1.39865	1.48389
5.33	0.605845	3.25286	0.017611	1.39857	1.484
5.33333	0.606109	3.25517	0.018285	1.39562	1.48211
5.33667	0.603401	3.25952	0.019885	1.39673	1.48146
5.34	0.607069	3.26177	0.018781	1.39786	1.48398
5.34333	0.610236	3.26488	0.016273	1.39567	1.48563
5.34667	0.607046	3.26855	0.016245	1.396	1.48116
5.35	0.607695	3.27064	0.017287	1.39751	1.4813
5.35333	0.610283	3.27062	0.018515	1.39695	1.48208
5.35667	0.610123	3.27191	0.01976	1.39669	1.48096
5.36	0.604119	3.27465	0.021126	1.39724	1.48075
5.36333	0.607291	3.27901	0.02034	1.39669	1.48269
5.36667	0.607917	3.28365	0.019846	1.3972	1.48209
5.37	0.607204	3.28664	0.019265	1.39743	1.48196
5.37333	0.605705	3.29064	0.019264	1.39638	1.48288
5.37667	0.611872	3.2953	0.020198	1.39634	1.48371
5.38	0.608089	3.29725	0.020426	1.39765	1.48295
5.38333	0.603389	3.29946	0.019581	1.3981	1.48506
5.38667	0.603988	3.30379	0.016627	1.3966	1.48308
5.39	0.601019	3.30442	0.017567	1.39888	1.47793
5.39333	0.597209	3.30511	0.016775	1.39944	1.48003
5.39667	0.594921	3.30822	0.016296	1.39931	1.47979
5.4	0.598064	3.31028	0.016882	1.39734	1.47523
5.40333	0.598031	3.3123	0.021429	1.39973	1.47591
5.40667	0.597781	3.31633	0.022179	1.39869	1.47793
5.41	0.600251	3.32221	0.024318	1.39873	1.47386
5.41333	0.605723	3.32462	0.025172	1.39717	1.47623
5.41667	0.603309	3.32619	0.026961	1.39859	1.47855
5.42	0.599967	3.32866	0.025702	1.3956	1.47821
5.42333	0.603372	3.33013	0.023901	1.39663	1.48071
5.42667	0.602542	3.3319	0.021994	1.39576	1.47966
5.43	0.598224	3.33534	0.019837	1.39464	1.48053
5.43333	0.601801	3.33782	0.017239	1.39419	1.48103
5.43667	0.606118	3.34147	0.015308	1.39606	1.47984
5.44	0.603298	3.34478	0.017606	1.3953	1.47919
5.44333	0.602799	3.34547	0.017629	1.39462	1.47955
5.44667	0.604955	3.34633	0.019998	1.39574	1.47707
5.45	0.603724	3.34832	0.021632	1.39494	1.47768
5.45333	0.603998	3.34946	0.023397	1.3939	1.47948
5.45667	0.610396	3.35216	0.02394	1.39366	1.47984
5.46	0.6121	3.35493	0.026264	1.39538	1.48103
5.46333	0.615242	3.3562	0.026646	1.39645	1.48066
5.46667	0.613714	3.35878	0.028407	1.39728	1.48148
5.47	0.613353	3.36206	0.028637	1.39747	1.48155
5.47333	0.611464	3.36507	0.026075	1.39717	1.48321
5.47667	0.608614	3.36707	0.023786	1.39814	1.48183
5.48	0.609486	3.36932	0.023878	1.3976	1.48287
5.48333	0.616542	3.37126	0.02168	1.39781	1.48276
5.48667	0.618043	3.37366	0.020519	1.39867	1.48246
5.49	0.615048	3.37644	0.022043	1.40015	1.48146
5.49333	0.62231	3.37975	0.021131	1.39852	1.4811
5.49667	0.624387	3.38378	0.019272	1.39752	1.48106
5.5	0.619938	3.38913	0.019438	1.39757	1.4808
5.50333	0.621683	3.39188	0.01967	1.39713	1.48161
5.50667	0.630427	3.39518	0.019001	1.39436	1.48125
5.51	0.628237	3.3976	0.021971	1.39563	1.48344
5.51333	0.629028	3.40043	0.023642	1.39625	1.48339
5.51667	0.627825	3.40181	0.022543	1.39664	1.48334
5.52	0.629087	3.404	0.023706	1.39652	1.48136
5.52333	0.626578	3.40553	0.023939	1.39797	1.48135
5.52667	0.623834	3.40816	0.02227	1.39816	1.47894
5.53	0.623608	3.4115	0.021442	1.39863	1.47951
5.53333	0.629261	3.41318	0.021718	1.39907	1.47885
5.53667	0.623902	3.41436	0.021316	1.39838	1.48143
5.54	0.623959	3.41614	0.022019	1.39744	1.48035
5.54333	0.622215	3.41908	0.020623	1.39721	1.48292
5.54667	0.614651	3.42122	0.020697	1.39649	1.48298
5.55	0.609983	3.42495	0.02119	1.39574	1.48192
5.55333	0.614224	3.42781	0.021532	1.39656	1.48061
5.55667	0.611023	3.43064	0.022377	1.39731	1.48245
5.56	0.613436	3.43296	0.026399	1.39651	1.48226
5.56333	0.621473	3.43435	0.028214	1.39732	1.48031
5.56667	0.624588	3.43602	0.028514	1.39746	1.48231
5.57	0.621827	3.43819	0.02725	1.39847	1.48243
5.57333	0.62345	3.44264	0.025742	1.39707	1.48167
5.57667	0.629108	3.44458	0.023734	1.39789	1.4799
5.58	0.627688	3.44628	0.021848	1.39799	1.48243
5.58333	0.627884	3.44947	0.021784	1.39775	1.48107
5.58667	0.630117	3.45427	0.023276	1.39625	1.48235
5.59	0.631429	3.45884	0.024062	1.39752	1.4837
5.59333	0.623388	3.46028	0.025489	1.39674	1.48592
5.59667	0.624133	3.46496	0.027716	1.39679	1.48468
5.6	0.623929	3.46726	0.027508	1.39734	1.48641
5.60333	0.625793	3.46892	0.026597	1.39819	1.48605
5.60667	0.629529	3.46893	0.028075	1.3999	1.48165
5.61	0.633229	3.47164	0.028186	1.40099	1.47825
5.61333	0.631789	3.47255	0.026551	1.40031	1.47624
5.61667	0.635131	3.47464	0.027593	1.40059	1.47645
5.62	0.634804	3.47666	0.026901	1.39961	1.47601
5.62333	0.627373	3.47976	0.025689	1.39813	1.47598
5.62667	0.631514	3.48015	0.021865	1.39606	1.48084
5.63	0.633819	3.48325	0.021326	1.39597	1.47916
5.63333	0.631255	3.48607	0.021906	1.39506	1.48035
5.63667	0.63077	3.48936	0.023107	1.39564	1.48009
5.64	0.635091	3.49004	0.023076	1.39536	1.4824
5.64333	0.635997	3.49597	0.025757	1.39756	1.47951
5.64667	0.63608	3.49871	0.027215	1.39776	1.48305
5.65	0.636327	3.50118	0.027234	1.39763	1.48105
5.65333	0.632549	3.5029	0.027301	1.39746	1.48071
5.65667	0.633627	3.50763	0.028456	1.39927	1.48153
5.66	0.633665	3.51043	0.030499	1.39812	1.48048
5.66333	0.632117	3.51206	0.03011	1.3974	1.48175
5.66667	0.628636	3.51346	0.030612	1.39578	1.47956
5.67	0.634675	3.5166	0.03132	1.39645	1.47839
5.67333	0.634507	3.51785	0.03005	1.39393	1.47783
5.67667	0.631498	3.52023	0.028568	1.39423	1.47957
5.68	0.632344	3.52259	0.028244	1.39643	1.48024
5.68333	0.636352	3.52534	0.025631	1.39746	1.48025
5.68667	0.636349	3.52648	0.026752	1.39858	1.482
5.69	0.634876	3.53189	0.02703	1.39943	1.48059
5.69333	0.634755	3.535	0.027376	1.39883	1.48305
5.69667	0.634241	3.53748	0.028681	1.39797	1.48259
5.7	0.633878	3.54012	0.030381	1.39761	1.48472
5.70333	0.629311	3.54358	0.029023	1.39774	1.48599
5.70667	0.628073	3.54548	0.028082	1.39621	1.48943
5.71	0.629601	3.54615	0.02537	1.396	1.48783
5.71333	0.631032	3.54704	0.023571	1.39659	1.487
5.71667	0.633646	3.55013	0.024086	1.39763	1.48605
5.72	0.638608	3.55307	0.025189	1.39497	1.48364
5.72333	0.643499	3.55415	0.025931	1.3968	1.48201
5.72667	0.639917	3.55608	0.031137	1.39783	1.48218
5.73	0.641704	3.56063	0.033319	1.39744	1.48287
5.73333	0.638694	3.5632	0.03132	1.39738	1.48396
5.73667	0.636805	3.56479	0.030206	1.39804	1.48444
5.74	0.637717	3.56799	0.031569	1.3982	1.48341
5.74333	0.644478	3.57296	0.027833	1.39791	1.48208
5.74667	0.644383	3.57269	0.026625	1.39635	1.48192
5.75	0.641324	3.57672	0.028816	1.39642	1.48172
5.75333	0.641889	3.58061	0.029241	1.39569	1.48241
5.75667	0.641392	3.58279	0.028988	1.39521	1.48382
5.76	0.641165	3.583	0.031108	1.39448	1.48263
5.76333	0.646096	3.58911	0.031838	1.39575	1.48325
5.76667	0.65599	3.58996	0.031689	1.39601	1.48394
5.77	0.658696	3.59008	0.031544	1.39703	1.48434
5.77333	0.661996	3.59444	0.032457	1.39779	1.48408
5.77667	0.660681	3.59821	0.031408	1.39837	1.48361
5.78	0.654527	3.59826	0.030275	1.39844	1.48245
5.78333	0.653334	3.60135	0.028951	1.39858	1.48204
5.78667	0.65416	3.60587	0.027312	1.39708	1.48129
5.79	0.653012	3.60605	0.026698	1.3956	1.47703
5.79333	0.649574	3.6053	0.026324	1.3956	1.48001
5.79667	0.655536	3.60902	0.027994	1.39543	1.47918
5.8	0.654006	3.60877	0.029783	1.39488	1.4742
5.80333	0.653708	3.60813	0.032273	1.39568	1.47549
5.80667	0.654571	3.61176	0.031836	1.39504	1.47875
5.81	0.65895	3.6171	0.030444	1.39429	1.47674
5.81333	0.658376	3.62075	0.030419	1.3928	1.47669
5.81667	0.65959	3.62431	0.030655	1.39326	1.48163
5.82	0.656593	3.62799	0.030767	1.3955	1.4805
5.82333	0.658556	3.63047	0.031017	1.39637	1.4839
5.82667	0.659368	3.63281	0.034114	1.39692	1.48655
5.83	0.653106	3.63407	0.033212	1.39669	1.48804
5.83333	0.656383	3.63805	0.033512	1.39639	1.48769
5.83667	0.663033	3.64024	0.03183	1.3944	1.48724
5.84	0.662804	3.64298	0.034849	1.39344	1.48488
5.84333	0.663095	3.64439	0.035193	1.39323	1.4795
5.84667	0.669415	3.64559	0.035331	1.39442	1.47792
5.85	0.66836	3.6473	0.035886	1.39394	1.47687
5.85333	0.668835	3.6513	0.037167	1.39322	1.47652
5.85667	0.667414	3.65694	0.033606	1.39457	1.47757
5.86	0.66471	3.659	0.031844	1.3962	1.48186
5.86333	0.663367	3.66198	0.031284	1.39607	1.4827
5.86667	0.663747	3.66384	0.030755	1.39581	1.48295
5.87	0.66125	3.66439	0.029192	1.39805	1.47976
5.87333	0.661928	3.66489	0.030851	1.39658	1.47484
5.87667	0.662473	3.66704	0.032562	1.39585	1.47481
5.88	0.662353	3.67039	0.034193	1.39739	1.47035
5.88333	0.658432	3.67341	0.032147	1.39595	1.47339
5.88667	0.658229	3.6754	0.034606	1.39697	1.47587
5.89	0.659306	3.6753	0.034253	1.39947	1.48007
5.89333	0.662477	3.67897	0.034778	1.39924	1.47742
5.89667	0.665741	3.67995	0.03375	1.39775	1.4811
5.9	0.669263	3.68085	0.035796	1.39998	1.47854
5.90333	0.667439	3.68496	0.034587	1.39893	1.47884
5.90667	0.664851	3.69082	0.035728	1.39802	1.47759
5.91	0.66731	3.69504	0.03552	1.39771	1.47807
5.91333	0.666849	3.6977	0.037084	1.39889	1.47985
5.91667	0.667429	3.70144	0.038079	1.39785	1.47905
5.92	0.666708	3.70299	0.038648	1.39745	1.48012
5.92333	0.667481	3.70365	0.037941	1.39854	1.47918
5.92667	0.66269	3.70692	0.036244	1.39796	1.48104
5.93	0.659133	3.71016	0.037021	1.39698	1.47972
5.93333	0.660812	3.71114	0.035363	1.39842	1.48007
5.93667	0.664619	3.71318	0.034563	1.39772	1.47771
5.94	0.665123	3.71414	0.032185	1.3967	1.48053
5.94333	0.670766	3.71409	0.033707	1.39631	1.47801
5.94667	0.673737	3.71543	0.031305	1.39708	1.4728
5.95	0.671448	3.72022	0.030499	1.39548	1.47343
5.95333	0.674505	3.72448	0.030499	1.39644	1.47691
5.95667	0.678071	3.72806	0.034708	1.39635	1.47669
5.96	0.67669	3.7287	0.034533	1.39666	1.47611
5.96333	0.677638	3.73065	0.03493	1.39723	1.48052
5.96667	0.676079	3.73011	0.036545	1.39766	1.4801
5.97	0.670272	3.73279	0.036299	1.39746	1.47783
5.97333	0.664215	3.73661	0.033351	1.3968	1.47602
5.97667	0.663166	3.74207	0.031616	1.39695	1.4762
5.98	0.661705	3.74623	0.033671	1.39567	1.47622
5.98333	0.662978	3.74995	0.034551	1.39548	1.47444
5.98667	0.666034	3.74885	0.036159	1.39341	1.47539
5.99	0.674514	3.74921	0.036853	1.39461	1.47282
5.99333	0.674271	3.74961	0.039874	1.39411	1.47535
5.99667	0.677139	3.7485	0.039121	1.39374	1.47464
6	0.679473	3.75188	0.038864	1.39362	1.47559
6.00333	0.679746	3.75617	0.038611	1.39541	1.47692
6.00667	0.67377	3.76015	0.038457	1.39387	1.48127
6.01	0.678469	3.76328	0.035861	1.39552	1.47997
6.01333	0.678713	3.76921	0.03649	1.39534	1.48048
6.01667	0.675343	3.7707	0.03733	1.39666	1.48065
6.02	0.679328	3.77275	0.037417	1.39679	1.47855
6.02333	0.683122	3.77369	0.038649	1.39781	1.47687
6.02667	0.681896	3.77216	0.038034	1.3961	1.47546
6.03	0.685328	3.77339	0.037899	1.39694	1.47571
6.03333	0.693545	3.77269	0.035642	1.39564	1.47622
6.03667	0.691172	3.77321	0.036034	1.39577	1.47786
6.04	0.691109	3.77629	0.036153	1.39485	1.47677
6.04333	0.695749	3.78109	0.037761	1.39645	1.47709
6.04667	0.695668	3.78354	0.036203	1.39702	1.47876
6.05	0.691175	3.78835	0.035959	1.39706	1.4782
6.05333	0.695087	3.79093	0.036546	1.39663	1.47463
6.05667	0.694619	3.7936	0.036332	1.39776	1.47589
6.06	0.689279	3.79646	0.036879	1.39576	1.47557
6.06333	0.685362	3.79814	0.037455	1.39563	1.47513
6.06667	0.684145	3.80051	0.037605	1.39687	1.47605
6.07	0.682278	3.80444	0.035873	1.39756	1.47729
6.07333	0.683259	3.80623	0.035087	1.39661	1.47725
6.07667	0.68242	3.80862	0.03495	1.3969	1.4802
6.08	0.683151	3.81071	0.034836	1.39701	1.47733
6.08333	0.687009	3.8124	0.035598	1.39558	1.47681
6.08667	0.687101	3.81635	0.035313	1.39516	1.47894
6.09	0.690278	3.81945	0.037696	1.39604	1.47792
6.09333	0.696287	3.82037	0.037856	1.39572	1.47595
6.09667	0.698743	3.82303	0.039596	1.39438	1.47837
6.1	0.699784	3.82497	0.0419	1.39439	1.479
6.10333	0.698866	3.82309	0.042797	1.39453	1.47676
6.10667	0.696488	3.82563	0.040933	1.39457	1.47773
6.11	0.695788	3.82756	0.040846	1.39575	1.47984
6.11333	0.693628	3.82831	0.0387	1.39715	1.47796
6.11667	0.69428	3.82998	0.036983	1.39724	1.47685
6.12	0.697327	3.83602	0.038007	1.39645	1.47837
6.12333	0.697184	3.83845	0.038562	1.39593	1.47669
6.12667	0.697446	3.84005	0.038567	1.39451	1.47422
6.13	0.702982	3.84533	0.039148	1.39486	1.47791
6.13333	0.703682	3.84757	0.038688	1.39494	1.47722
6.13667	0.702306	3.84766	0.037919	1.39536	1.47561
6.14	0.704148	3.84955	0.037023	1.39489	1.47745
6.14333	0.702439	3.85271	0.036982	1.39606	1.47908
6.14667	0.69803	3.85401	0.03623	1.39527	1.47675
6.15	0.696884	3.85717	0.037245	1.39608	1.47814
6.15333	0.697188	3.85956	0.037553	1.39561	1.47852
6.15667	0.69706	3.86031	0.037361	1.39589	1.47708
6.16	0.695282	3.86366	0.038163	1.39561	1.47688
6.16333	0.694348	3.8661	0.040008	1.39549	1.47804
6.16667	0.692568	3.86679	0.040327	1.39523	1.47585
6.17	0.689542	3.86848	0.039717	1.39697	1.4763
6.17333	0.687797	3.87168	0.041039	1.39673	1.4777
6.17667	0.689033	3.87409	0.041468	1.39679	1.47731
6.18	0.68949	3.87288	0.040464	1.3972	1.47518
6.18333	0.690859	3.87638	0.04062	1.39716	1.47769
6.18667	0.692761	3.87903	0.041099	1.39562	1.47554
6.19	0.691652	3.88304	0.040542	1.39762	1.47609
6.19333	0.694591	3.88343	0.040131	1.39838	1.47547
6.19667	0.694977	3.88847	0.040609	1.39644	1.47411
6.2	0.698364	3.89049	0.042465	1.39672	1.47316
6.20333	0.696296	3.89247	0.043253	1.39706	1.47439
6.20667	0.700132	3.89397	0.043187	1.39526	1.47404
6.21	0.697472	3.89404	0.042268	1.39624	1.47393
6.21333	0.699871	3.89378	0.041558	1.39746	1.47492
6.21667	0.69648	3.89687	0.038432	1.39717	1.47536
6.22	0.701445	3.90008	0.039031	1.39749	1.47626
6.22333	0.699762	3.9043	0.039398	1.39765	1.47229
6.22667	0.698238	3.90899	0.037869	1.39563	1.47173
6.23	0.697286	3.91372	0.039693	1.39493	1.47149
6.23333	0.700374	3.91384	0.041726	1.39438	1.4713
6.23667	0.698941	3.91527	0.043375	1.39341	1.47283
6.24	0.699716	3.91592	0.045659	1.3935	1.47673
6.24333	0.70643	3.91921	0.048071	1.39445	1.47721
6.24667	0.710515	3.91979	0.047904	1.39442	1.47833
6.25	0.709796	3.92322	0.047185	1.39606	1.47943
6.25333	0.712327	3.92555	0.0439	1.3969	1.47799
6.25667	0.714092	3.92916	0.039315	1.39591	1.47793
6.26	0.713682	3.92968	0.040087	1.39663	1.4779
6.26333	0.71188	3.93144	0.038363	1.39704	1.47808
6.26667	0.711832	3.93158	0.039287	1.39515	1.47822
6.27	0.715855	3.9333	0.039488	1.39364	1.48003
6.27333	0.718321	3.93239	0.041273	1.39459	1.47954
6.27667	0.713522	3.93808	0.040379	1.39283	1.48055
6.28	0.713034	3.94256	0.041947	1.39215	1.48036
6.28333	0.710923	3.94627	0.039469	1.39444	1.47921
6.28667	0.705452	3.94803	0.040477	1.39446	1.4774
6.29	0.70564	3.9508	0.042046	1.39415	1.47546
6.29333	0.710875	3.95	0.043895	1.39509	1.47634
6.29667	0.708469	3.95037	0.042505	1.39593	1.47659
6.3	0.714122	3.95263	0.042783	1.39427	1.47658
6.30333	0.717663	3.95589	0.0429	1.39464	1.47528
6.30667	0.716658	3.95953	0.042475	1.39523	1.47704
6.31	0.716403	3.96258	0.040925	1.39497	1.47553
6.31333	0.724633	3.96404	0.04099	1.39483	1.475
6.31667	0.725204	3.96447	0.042726	1.39452	1.47481
6.32	0.724959	3.96647	0.042527	1.39638	1.47685
6.32333	0.723899	3.96927	0.042217	1.39515	1.47617
6.32667	0.724507	3.9715	0.042425	1.39527	1.47631
6.33	0.72195	3.97621	0.043691	1.39352	1.47596
6.33333	0.720124	3.98156	0.04211	1.39389	1.4752
6.33667	0.720534	3.98376	0.042436	1.39269	1.47583
6.34	0.723088	3.98382	0.043007	1.3935	1.47373
6.34333	0.723437	3.98498	0.041231	1.39252	1.47311
6.34667	0.723421	3.98469	0.041081	1.39434	1.47298
6.35	0.723409	3.98465	0.042055	1.39318	1.47307
6.35333	0.728452	3.98616	0.040711	1.39249	1.4728
6.35667	0.730099	3.98784	0.040549	1.39045	1.47636
6.36	0.730375	3.99025	0.043095	1.39084	1.47612
6.36333	0.734282	3.99495	0.043234	1.39061	1.47791
6.36667	0.736492	3.99637	0.042198	1.39199	1.47815
6.37	0.733096	3.99768	0.044035	1.39233	1.47793
6.37333	0.729468	4.00003	0.044255	1.39481	1.47899
6.37667	0.728854	4.00301	0.044569	1.39502	1.4805
6.38	0.727332	4.00156	0.043594	1.39599	1.47845
6.38333	0.720765	4.00485	0.044451	1.3947	1.4797
6.38667	0.721888	4.00637	0.042907	1.39442	1.47794
6.39	0.724979	4.00864	0.043393	1.39427	1.47623
6.39333	0.727575	4.01287	0.041015	1.39495	1.47411
6.39667	0.728022	4.01644	0.041456	1.39389	1.47531
6.4	0.734092	4.01891	0.041971	1.39487	1.4743
6.40333	0.733171	4.02272	0.044971	1.39561	1.47368
6.40667	0.731716	4.0244	0.04294	1.39595	1.47107
6.41	0.730542	4.02263	0.043573	1.39353	1.47159
6.41333	0.731723	4.02416	0.046207	1.39435	1.4713
6.41667	0.731465	4.02624	0.047743	1.39424	1.47276
6.42	0.729827	4.02636	0.045982	1.39484	1.47261
6.42333	0.72919	4.02935	0.047412	1.39322	1.47632
6.42667	0.730183	4.03106	0.049547	1.39517	1.477
6.43	0.730124	4.03141	0.047695	1.39468	1.47498
6.43333	0.731662	4.03169	0.047506	1.39535	1.47244
6.43667	0.732471	4.03365	0.046697	1.39464	1.47346
6.44	0.733877	4.03507	0.045896	1.3955	1.47239
6.44333	0.731698	4.03754	0.044601	1.39424	1.47331
6.44667	0.731186	4.03957	0.04356	1.39267	1.47699
6.45	0.729946	4.04488	0.042494	1.39234	1.47674
6.45333	0.73106	4.04848	0.043299	1.39212	1.47711
6.45667	0.731237	4.05165	0.045888	1.3906	1.4762
6.46	0.730815	4.05276	0.0452	1.39155	1.47451
6.46333	0.735348	4.05552	0.047652	1.39146	1.46967
6.46667	0.735944	4.05488	0.04858	1.39065	1.47003
6.47	0.73887	4.05598	0.048869	1.39242	1.47211
6.47333	0.744872	4.05667	0.048465	1.39323	1.47282
6.47667	0.750474	4.06209	0.050897	1.39389	1.47497
6.48	0.745733	4.06512	0.049097	1.39641	1.4754
6.48333	0.747716	4.06769	0.047869	1.39609	1.4783
6.48667	0.748044	4.07034	0.046925	1.3943	1.47505
6.49	0.745364	4.07267	0.045913	1.39536	1.47039
6.49333	0.74721	4.07373	0.044859	1.3943	1.46858
6.49667	0.748346	4.0753	0.04631	1.39277	1.47271
6.5	0.750135	4.07754	0.045923	1.39298	1.47212
6.50333	0.749245	4.07764	0.047135	1.39301	1.47396
6.50667	0.748864	4.07911	0.046872	1.39311	1.48061
6.51	0.747212	4.08061	0.048354	1.39397	1.48093
6.51333	0.749527	4.08317	0.04775	1.39406	1.47857
6.51667	0.748959	4.08482	0.048841	1.39445	1.47668
6.52	0.748165	4.08734	0.050565	1.3953	1.47571
6.52333	0.749314	4.08985	0.051113	1.3954	1.46951
6.52667	0.745452	4.0929	0.049152	1.39524	1.47064
6.53	0.740172	4.09575	0.051104	1.39566	1.47252
6.53333	0.742259	4.09589	0.052766	1.39452	1.47335
6.53667	0.742263	4.09999	0.05183	1.39426	1.47457
6.54	0.741311	4.10188	0.051828	1.39416	1.48004
6.54333	0.745104	4.10491	0.052672	1.39433	1.47925
6.54667	0.751288	4.10561	0.050924	1.39419	1.47711
6.55	0.748357	4.10813	0.050503	1.39554	1.47539
6.55333	0.755208	4.10779	0.050492	1.39492	1.47672
6.55667	0.75629	4.11034	0.047954	1.39297	1.47549
6.56	0.756061	4.11155	0.049536	1.39339	1.47385
6.56333	0.756104	4.11363	0.050677	1.39199	1.47462
6.56667	0.756685	4.11522	0.049424	1.39253	1.47608
6.57	0.754263	4.11684	0.048665	1.39162	1.47202
6.57333	0.755848	4.11844	0.051159	1.39332	1.46937
6.57667	0.759244	4.12094	0.052551	1.39439	1.46971
6.58	0.758788	4.12249	0.052282	1.39491	1.46932
6.58333	0.758635	4.12677	0.052223	1.39339	1.47157
6.58667	0.752989	4.13123	0.051901	1.39521	1.47422
6.59	0.750438	4.13218	0.051168	1.395	1.47699
6.59333	0.747353	4.13151	0.049679	1.39342	1.4781
6.59667	0.751859	4.13351	0.049158	1.39265	1.47869
6.6	0.750696	4.13533	0.047163	1.39507	1.47605
6.60333	0.753607	4.13578	0.047881	1.39418	1.47425
6.60667	0.753624	4.13856	0.049107	1.39376	1.47559
6.61	0.757063	4.14414	0.047826	1.39324	1.47565
6.61333	0.752305	4.14578	0.047062	1.39443	1.47664
6.61667	0.755575	4.14875	0.049455	1.39305	1.47795
6.62	0.752962	4.15065	0.050829	1.39378	1.47642
6.62333	0.75581	4.15342	0.05005	1.39351	1.47394
6.62667	0.754539	4.15571	0.051899	1.39398	1.47343
6.63	0.756794	4.15779	0.052003	1.39457	1.4719
6.63333	0.754231	4.1579	0.051441	1.39559	1.47025
6.63667	0.7573	4.1619	0.048995	1.39453	1.47231
6.64	0.759798	4.16209	0.049968	1.39594	1.46979
6.64333	0.763096	4.16148	0.048292	1.39566	1.46845
6.64667	0.766417	4.16427	0.049811	1.39535	1.46502
6.65	0.770493	4.16387	0.049362	1.39527	1.46298
6.65333	0.773792	4.16269	0.050243	1.39474	1.46207
6.65667	0.771122	4.16397	0.050185	1.39513	1.46471
6.66	0.769155	4.16819	0.049241	1.39556	1.46592
[truncated: 22,302 more rows]
