# Supplementary material for: Early steps of protein disaggregation by Hsp70 chaperone and class B J-domain proteins are shaped by Hsp110
Source: eLife. 2024 Oct 15;13:RP94795. doi: 10.7554/eLife.94795 (PMC11479587; doi:10.7554/eLife.94795)
Supplement: Figure 1—figure supplement 2—source data 2. [file elife-94795-fig1-figsupp2-data2.xlsx]

## Sheet: Figure 1—figure supplement 2B
Time [min]	1uM Sis1, 1uM Ssa1	1uM Sis1, 5uM Ssa1	1uM Sis1, 6uM Ssa1	1uM Sis1, 1uM Ssa1, 0,1uM Sse1	1uM Sis1, 5uM Ssa1, 0,1uM Sse1
0	0	0	0	0	0
0.003333	0.001413	-0.00566	0.004368	-0.00179	0.012957
0.006667	-0.00075	-0.00088	0.005715	-5.7e-05	0.011109
0.01	0.000256	-0.0016	0.005428	-0.00011	0.010403
0.013333	-0.00094	-0.00156	0.006446	-0.00093	0.010937
0.016667	-0.001	-0.00267	0.007466	-0.00074	0.009171
0.02	-0.00121	-0.00128	0.005243	-0.00179	0.003048
0.023333	0.000628	-0.00304	0.006126	-0.00272	0.004265
0.026667	0.000171	-0.00318	0.006432	-0.00406	0.004026
0.03	0.001236	-0.00403	0.005848	-0.00417	0.000442
0.033333	-0.00109	-0.00323	0.005553	-0.0052	-0.00058
0.036667	0.000322	-0.00555	0.007053	-0.00365	-0.00072
0.04	-0.00276	-0.00703	0.00422	-0.00313	-0.00338
0.043333	-0.00565	-0.00881	0.003571	-0.0031	-0.00397
0.046667	-0.00636	-0.00944	0.003339	-0.00237	-0.00254
0.05	-0.00474	-0.01273	0.001815	-0.00318	-0.00212
0.053333	-0.00565	-0.01298	0.000968	-0.00478	0.000675
0.056667	-0.00291	-0.01306	0.004365	-0.00598	0.001346
0.06	0.00108	-0.01577	0.005163	-0.00674	0.000144
0.063333	-0.00033	-0.01617	0.005435	-0.00719	-0.00045
0.066667	-0.00338	-0.01511	0.00771	-0.00472	-0.00072
0.07	-0.00261	-0.01602	0.0089	-0.00256	-0.00356
0.073333	-0.00376	-0.01911	0.007701	-0.00385	-0.00458
0.076667	-0.0062	-0.01646	0.008427	-0.00386	-0.00359
0.08	-0.00478	-0.01677	0.008667	-0.0062	-0.00467
0.083333	-0.00088	-0.01669	0.007457	-0.01009	-0.00667
0.086667	-0.00457	-0.01667	0.005607	-0.01157	-0.00662
0.09	-0.00507	-0.01482	0.005737	-0.01194	-0.006
0.093333	-0.00701	-0.01645	0.003558	-0.01048	-0.00843
0.096667	-0.00661	-0.01589	0.002177	-0.00905	-0.00856
0.1	-0.00792	-0.01735	0.002255	-0.00888	-0.00632
0.103333	-0.00623	-0.01667	0.00108	-0.01043	-0.00605
0.106667	-0.00818	-0.01848	0.000659	-0.00861	-0.00706
0.11	-0.00459	-0.01742	0.002293	-0.00968	-0.00626
0.113333	-0.0088	-0.01807	0.003114	-0.01128	-0.00637
0.116667	-0.00909	-0.01628	0.002402	-0.00997	-0.00719
0.12	-0.00953	-0.01455	0.005728	-0.009	-0.00706
0.123333	-0.00899	-0.01305	0.004923	-0.01053	-0.00738
0.126667	-0.00965	-0.01219	0.004447	-0.00938	-0.00709
0.13	-0.00714	-0.01309	0.004397	-0.00834	-0.00674
0.133333	-0.00641	-0.01451	0.004881	-0.00832	-0.00616
0.136667	-0.00843	-0.01532	0.003418	-0.00883	-0.00738
0.14	-0.00577	-0.01583	0.005215	-0.00917	-0.00791
0.143333	-0.0072	-0.0169	0.004717	-0.01163	-0.00762
0.146667	-0.0059	-0.01824	0.003058	-0.01265	-0.00911
0.15	-0.00787	-0.01633	0.001986	-0.01189	-0.01103
0.153333	-0.00512	-0.01801	0.001758	-0.01142	-0.00981
0.156667	-0.00537	-0.01714	-0.00191	-0.00935	-0.00956
0.16	-0.00364	-0.01657	-0.0022	-0.00757	-0.00968
0.163333	-0.00691	-0.01533	-0.00202	-0.00759	-0.00922
0.166667	-0.00287	-0.01734	-0.00448	-0.00951	-0.00826
0.17	-0.00455	-0.01614	-0.00476	-0.01027	-0.01006
0.173333	-0.00443	-0.01648	-0.00359	-0.01328	-0.00955
0.176667	-0.00701	-0.01701	-0.00458	-0.01341	-0.00939
0.18	-0.00288	-0.0157	-0.00554	-0.01392	-0.00953
0.183333	-0.00394	-0.01441	-0.00338	-0.01374	-0.01078
0.186667	-0.00313	-0.01514	-0.00539	-0.01275	-0.0118
0.19	-0.004	-0.01486	-0.00539	-0.01162	-0.01035
0.193333	-0.0036	-0.01504	-0.00565	-0.01119	-0.01118
0.196667	-0.00673	-0.015	-0.00441	-0.00919	-0.01119
0.2	-0.00781	-0.01574	-0.00491	-0.01125	-0.01153
0.203333	-0.00886	-0.0169	-0.00475	-0.01249	-0.01196
0.206667	-0.00878	-0.01707	-0.00349	-0.0121	-0.01331
0.21	-0.00868	-0.01595	-0.00505	-0.0132	-0.01332
0.213333	-0.00828	-0.01566	-0.00346	-0.01352	-0.01415
0.216667	-0.00889	-0.01559	-0.00452	-0.01013	-0.01304
0.22	-0.00883	-0.01627	-0.00476	-0.00958	-0.01183
0.223333	-0.00923	-0.0168	-0.00739	-0.01224	-0.01295
0.226667	-0.00947	-0.01811	-0.00663	-0.01227	-0.01285
0.23	-0.00856	-0.0198	-0.01065	-0.01365	-0.01203
0.233333	-0.00777	-0.01865	-0.00942	-0.01601	-0.01053
0.236667	-0.00675	-0.01623	-0.0099	-0.01741	-0.00945
0.24	-0.00966	-0.0157	-0.00979	-0.01558	-0.00776
0.243333	-0.00897	-0.01425	-0.00906	-0.01558	-0.01022
0.246667	-0.00872	-0.01315	-0.00875	-0.01499	-0.00945
0.25	-0.01047	-0.01357	-0.00831	-0.01432	-0.01013
0.253333	-0.01196	-0.01428	-0.00755	-0.01285	-0.01005
0.256667	-0.00949	-0.01534	-0.00729	-0.01627	-0.01198
0.26	-0.00939	-0.01668	-0.00651	-0.01677	-0.00973
0.263333	-0.01226	-0.01567	-0.00532	-0.01807	-0.01073
0.266667	-0.01053	-0.01627	-0.00622	-0.01808	-0.01407
0.27	-0.01151	-0.01502	-0.00647	-0.02055	-0.01413
0.273333	-0.01145	-0.01486	-0.00533	-0.01965	-0.01239
0.276667	-0.01373	-0.01452	-0.00641	-0.02001	-0.01294
0.28	-0.0106	-0.01715	-0.00776	-0.02094	-0.01094
0.283333	-0.01228	-0.01778	-0.00683	-0.02229	-0.00861
0.286667	-0.01072	-0.01987	-0.00728	-0.02071	-0.00854
0.29	-0.01145	-0.01962	-0.00759	-0.02047	-0.0093
0.293333	-0.01085	-0.02037	-0.0064	-0.0223	-0.00862
0.296667	-0.01461	-0.01962	-0.00607	-0.01922	-0.01052
0.3	-0.01193	-0.01998	-0.00634	-0.02035	-0.01054
0.303333	-0.01301	-0.01847	-0.00541	-0.02098	-0.01277
0.306667	-0.01198	-0.0189	-0.00581	-0.02003	-0.01285
0.31	-0.01318	-0.01802	-0.00631	-0.01895	-0.01466
0.313333	-0.00987	-0.01939	-0.0047	-0.01899	-0.01334
0.316667	-0.01453	-0.02061	-0.00392	-0.01765	-0.01508
0.32	-0.01347	-0.02214	-0.0042	-0.01763	-0.01345
0.323333	-0.01323	-0.02191	-0.00444	-0.01584	-0.0139
0.326667	-0.01184	-0.02249	-0.00463	-0.01831	-0.01224
0.33	-0.01286	-0.02095	-0.00594	-0.02034	-0.01313
0.333333	-0.01011	-0.01947	-0.00634	-0.02067	-0.012
0.336667	-0.01113	-0.02003	-0.00742	-0.02183	-0.01149
0.34	-0.01245	-0.01995	-0.00552	-0.02356	-0.01189
0.343333	-0.01226	-0.0199	-0.00489	-0.02199	-0.01339
0.346667	-0.01205	-0.01997	-0.00287	-0.0227	-0.01395
0.35	-0.01269	-0.01902	-0.0029	-0.02303	-0.01317
0.353333	-0.01213	-0.01899	-0.00232	-0.0233	-0.01555
0.356667	-0.01286	-0.01946	-0.00684	-0.02408	-0.01659
0.36	-0.01409	-0.02253	-0.00644	-0.02361	-0.01471
0.363333	-0.01526	-0.02204	-0.00853	-0.02359	-0.01566
0.366667	-0.01661	-0.02313	-0.00831	-0.02417	-0.01774
0.37	-0.01603	-0.02256	-0.00856	-0.02482	-0.01793
0.373333	-0.01533	-0.0218	-0.00827	-0.0252	-0.01768
0.376667	-0.01573	-0.02043	-0.00954	-0.02489	-0.01942
0.38	-0.01223	-0.02303	-0.00941	-0.02387	-0.01864
0.383333	-0.01081	-0.02341	-0.01211	-0.02206	-0.01791
0.386667	-0.01063	-0.02414	-0.01121	-0.02031	-0.01778
0.39	-0.01371	-0.02465	-0.01074	-0.02213	-0.01873
0.393333	-0.01154	-0.02449	-0.00884	-0.02369	-0.01819
0.396667	-0.01478	-0.0241	-0.00946	-0.02315	-0.02093
0.4	-0.01432	-0.0251	-0.00871	-0.02675	-0.02192
0.403333	-0.01841	-0.02416	-0.00919	-0.02799	-0.02033
0.406667	-0.01632	-0.02572	-0.00798	-0.02689	-0.01968
0.41	-0.01883	-0.02521	-0.01033	-0.02476	-0.02046
0.413333	-0.01604	-0.02431	-0.01055	-0.02472	-0.01722
0.416667	-0.01654	-0.02353	-0.01136	-0.02252	-0.01748
0.42	-0.01444	-0.02444	-0.01245	-0.02148	-0.01788
0.423333	-0.01529	-0.02198	-0.01386	-0.02242	-0.01913
0.426667	-0.01575	-0.02274	-0.01379	-0.02228	-0.02038
0.43	-0.01716	-0.02328	-0.01429	-0.02479	-0.02332
0.433333	-0.017	-0.02337	-0.01281	-0.02617	-0.02511
0.436667	-0.01717	-0.02279	-0.01241	-0.02765	-0.02705
0.44	-0.01728	-0.02547	-0.01183	-0.02608	-0.02588
0.443333	-0.016	-0.02402	-0.01357	-0.02808	-0.0248
0.446667	-0.01579	-0.02324	-0.01364	-0.02829	-0.02457
0.45	-0.01639	-0.02281	-0.01482	-0.02726	-0.02483
0.453333	-0.01453	-0.02389	-0.01487	-0.028	-0.02189
0.456667	-0.0139	-0.02291	-0.01386	-0.02764	-0.02447
0.46	-0.0147	-0.02379	-0.01475	-0.02672	-0.02594
0.463333	-0.0168	-0.02387	-0.01336	-0.02589	-0.0262
0.466667	-0.02002	-0.02392	-0.01373	-0.0264	-0.02508
0.47	-0.02228	-0.02415	-0.01438	-0.02581	-0.02719
0.473333	-0.02528	-0.02341	-0.01301	-0.02739	-0.02724
0.476667	-0.02299	-0.02272	-0.00981	-0.02741	-0.02629
0.48	-0.02246	-0.024	-0.00973	-0.02816	-0.02541
0.483333	-0.02106	-0.02299	-0.00906	-0.02795	-0.02351
0.486667	-0.01948	-0.02172	-0.00928	-0.02671	-0.02388
0.49	-0.01726	-0.02232	-0.01152	-0.02682	-0.02199
0.493333	-0.01888	-0.02353	-0.01168	-0.02939	-0.02077
0.496667	-0.01956	-0.0212	-0.01217	-0.03025	-0.02075
0.5	0.047884	0.079851	-0.06789	0.027863	0.137876
0.503333	0.045965	0.09266	-0.06542	0.025533	0.158902
0.506667	0.060992	0.106971	-0.0598	0.024045	0.168106
0.51	0.060117	0.099601	-0.05329	0.0265	0.164424
0.513333	0.056112	0.108096	-0.05196	0.024811	0.165402
0.516667	0.059901	0.114135	-0.04731	0.023332	0.170304
0.52	0.059976	0.11953	-0.04295	0.023687	0.169913
0.523333	0.058766	0.120589	-0.03826	0.023376	0.168649
0.526667	0.061237	0.127213	-0.0346	0.022229	0.169334
0.53	0.06305	0.128829	-0.02979	0.021704	0.170914
0.533333	0.060828	0.132774	-0.02644	0.021271	0.172145
0.536667	0.063447	0.13345	-0.01942	0.021473	0.173508
0.54	0.063652	0.136764	-0.01757	0.022185	0.179323
0.543333	0.059748	0.137527	-0.0148	0.023711	0.18163
0.546667	0.063058	0.142704	-0.01324	0.023953	0.18467
0.55	0.063293	0.145902	-0.01103	0.024305	0.188072
0.553333	0.067544	0.148491	-0.01429	0.023544	0.190637
0.556667	0.068142	0.152795	-0.01129	0.024106	0.189477
0.56	0.068157	0.156915	-0.00988	0.023604	0.19045
0.563333	0.066115	0.157811	-0.0099	0.023766	0.189278
0.566667	0.067792	0.157132	-0.01009	0.025798	0.189267
0.57	0.063746	0.158175	-0.00664	0.025273	0.190671
0.573333	0.061043	0.15762	-0.00503	0.024469	0.192605
0.576667	0.063388	0.157062	-0.00475	0.024844	0.193637
0.58	0.063032	0.157502	-0.00373	0.026306	0.195681
0.583333	0.065839	0.159352	-0.00089	0.024793	0.196887
0.586667	0.065035	0.160284	-0.00127	0.025388	0.196018
0.59	0.070397	0.1616	-0.00071	0.0261	0.19674
0.593333	0.071847	0.163623	6.3e-05	0.027113	0.198322
0.596667	0.074072	0.164295	0.001944	0.026555	0.200791
0.6	0.072448	0.165065	0.003498	0.027678	0.202575
0.603333	0.075519	0.165	0.005576	0.028446	0.203712
0.606667	0.0732	0.164623	0.005324	0.029323	0.20343
0.61	0.072913	0.165503	0.006891	0.028707	0.20425
0.613333	0.070502	0.167615	0.007555	0.027989	0.204264
0.616667	0.071412	0.168189	0.007547	0.028111	0.204109
0.62	0.067113	0.170257	0.007556	0.028255	0.205242
0.623333	0.068374	0.170171	0.011144	0.027582	0.206816
0.626667	0.067971	0.169364	0.012587	0.028042	0.207613
0.63	0.069006	0.169515	0.013468	0.030753	0.20631
0.633333	0.069612	0.170245	0.01466	0.031698	0.207405
0.636667	0.073434	0.171084	0.016402	0.033159	0.20844
0.64	0.072497	0.173891	0.015956	0.034986	0.208259
0.643333	0.071274	0.174634	0.016307	0.035852	0.208396
0.646667	0.069888	0.174772	0.019452	0.033936	0.209088
0.65	0.070467	0.175879	0.018965	0.034763	0.210772
0.653333	0.068868	0.174625	0.017326	0.03777	0.213149
0.656667	0.071339	0.175983	0.017386	0.03611	0.215123
0.66	0.07475	0.176959	0.016014	0.035375	0.215411
0.663333	0.073595	0.177826	0.01583	0.036631	0.216064
0.666667	0.07205	0.178016	0.017312	0.036155	0.215257
0.67	0.07463	0.180087	0.020222	0.033341	0.214139
0.673333	0.072671	0.178805	0.020974	0.035983	0.213426
0.676667	0.072582	0.180063	0.024066	0.036255	0.213158
0.68	0.073782	0.180071	0.022237	0.03717	0.214692
0.683333	0.07652	0.180351	0.024453	0.038122	0.213837
0.686667	0.074389	0.181371	0.025916	0.038477	0.215762
0.69	0.077525	0.183129	0.027137	0.038903	0.217316
0.693333	0.075262	0.180988	0.02803	0.040701	0.21785
0.696667	0.076349	0.182111	0.031819	0.041025	0.218745
0.7	0.076258	0.183098	0.030247	0.041649	0.22277
0.703333	0.074654	0.18344	0.0317	0.043221	0.220201
0.706667	0.071122	0.183669	0.033367	0.04341	0.21901
0.71	0.072359	0.185562	0.031625	0.042507	0.220071
0.713333	0.071905	0.184589	0.032079	0.043183	0.220063
0.716667	0.070159	0.183739	0.034639	0.040758	0.218149
0.72	0.073144	0.184735	0.034229	0.040968	0.21963
0.723333	0.076749	0.185614	0.034598	0.040127	0.220049
0.726667	0.076282	0.186464	0.037846	0.041422	0.221024
0.73	0.074777	0.18818	0.036625	0.041826	0.221281
0.733333	0.076521	0.188746	0.0353	0.045467	0.220978
0.736667	0.077216	0.188638	0.036039	0.044768	0.220106
0.74	0.074347	0.189423	0.036524	0.045052	0.21851
0.743333	0.076595	0.190885	0.037392	0.0446	0.219976
0.746667	0.079141	0.189089	0.038954	0.045155	0.222266
0.75	0.077915	0.190279	0.040832	0.045522	0.222974
0.753333	0.079882	0.191637	0.041159	0.045486	0.224783
0.756667	0.081159	0.192266	0.04156	0.047864	0.230074
0.76	0.076458	0.191402	0.039373	0.049833	0.22979
0.763333	0.077428	0.193732	0.041226	0.050657	0.23217
0.766667	0.079605	0.194281	0.041032	0.050929	0.233554
0.77	0.07518	0.192347	0.041533	0.050237	0.234401
0.773333	0.076689	0.191916	0.041383	0.048477	0.235016
0.776667	0.07851	0.19321	0.04481	0.047329	0.236614
0.78	0.07679	0.194036	0.044038	0.047538	0.234151
0.783333	0.072234	0.194552	0.044179	0.048262	0.237431
0.786667	0.072655	0.195945	0.04375	0.050137	0.23876
0.79	0.073214	0.196088	0.043833	0.052389	0.239196
0.793333	0.076019	0.19703	0.042681	0.053335	0.239941
0.796667	0.075127	0.197702	0.043118	0.055651	0.240766
0.8	0.077394	0.197689	0.04475	0.058026	0.23955
0.803333	0.078597	0.19745	0.045682	0.060042	0.240556
0.806667	0.077508	0.199531	0.046893	0.060166	0.238741
0.81	0.077048	0.200165	0.048599	0.061891	0.238007
0.813333	0.078417	0.200313	0.048846	0.060877	0.239737
0.816667	0.07925	0.200047	0.050532	0.060501	0.238294
0.82	0.079531	0.200735	0.05137	0.06184	0.236458
0.823333	0.079762	0.20023	0.053438	0.062028	0.236901
0.826667	0.076844	0.199102	0.052047	0.063069	0.238394
0.83	0.075407	0.199022	0.055465	0.064608	0.237427
0.833333	0.074016	0.200872	0.0543	0.063404	0.239511
0.836667	0.071642	0.203521	0.054973	0.065573	0.242414
0.84	0.074285	0.204502	0.053869	0.066991	0.244544
0.843333	0.074239	0.204926	0.055708	0.06733	0.243718
0.846667	0.075665	0.205869	0.054695	0.066151	0.246692
0.85	0.077295	0.205469	0.056101	0.067973	0.247509
0.853333	0.07846	0.205177	0.057341	0.067634	0.248589
0.856667	0.075917	0.204562	0.058102	0.067707	0.251363
0.86	0.079668	0.204757	0.059272	0.067231	0.251868
0.863333	0.079197	0.205451	0.060381	0.067855	0.25068
0.866667	0.077242	0.205659	0.061084	0.069572	0.253796
0.87	0.082235	0.206528	0.061619	0.069432	0.253564
0.873333	0.083374	0.20613	0.062486	0.072092	0.251467
0.876667	0.079271	0.208198	0.064952	0.072251	0.2506
0.88	0.079285	0.209438	0.065405	0.074786	0.251939
0.883333	0.082503	0.211719	0.066347	0.075109	0.250711
0.886667	0.080308	0.21081	0.062507	0.075766	0.250823
0.89	0.077746	0.21233	0.062941	0.074371	0.251064
0.893333	0.082459	0.209952	0.061333	0.077141	0.255394
0.896667	0.08128	0.209822	0.063137	0.078717	0.254518
0.9	0.082452	0.210235	0.062337	0.079871	0.256946
0.903333	0.08096	0.210752	0.066831	0.080883	0.259051
0.906667	0.079466	0.209152	0.066088	0.083077	0.259383
0.91	0.076909	0.212158	0.066699	0.083427	0.259766
0.913333	0.084597	0.211263	0.065515	0.083501	0.263327
0.916667	0.080862	0.211474	0.065005	0.083824	0.260854
0.92	0.079746	0.212706	0.066007	0.084219	0.262048
0.923333	0.082732	0.217164	0.069762	0.086313	0.264626
0.926667	0.083342	0.216965	0.070034	0.087485	0.265397
0.93	0.078757	0.21896	0.071354	0.088885	0.26266
0.933333	0.081915	0.216873	0.072987	0.089382	0.266084
0.936667	0.083093	0.217898	0.072329	0.091698	0.26601
0.94	0.085338	0.216736	0.070971	0.089854	0.265011
0.943333	0.085566	0.216594	0.070885	0.090908	0.265538
0.946667	0.087358	0.217831	0.070139	0.091832	0.270097
0.95	0.084887	0.221102	0.071008	0.093317	0.270395
0.953333	0.08405	0.219606	0.069804	0.093017	0.272322
0.956667	0.083153	0.22016	0.073489	0.096424	0.274573
0.96	0.082499	0.220778	0.074523	0.098149	0.272613
0.963333	0.080518	0.22099	0.075314	0.098531	0.270465
0.966667	0.08512	0.220802	0.076334	0.101083	0.270242
0.97	0.086907	0.221794	0.079012	0.101786	0.269231
0.973333	0.084901	0.221524	0.076019	0.102317	0.269779
0.976667	0.086443	0.223447	0.076404	0.103355	0.273192
0.98	0.089884	0.22318	0.077955	0.105273	0.277285
0.983333	0.084984	0.223576	0.077605	0.105407	0.279382
0.986667	0.085271	0.224415	0.078511	0.107633	0.282997
0.99	0.086583	0.22579	0.080473	0.109697	0.283462
0.993333	0.08552	0.225772	0.082487	0.11105	0.289185
0.996667	0.083103	0.225923	0.08238	0.112058	0.289266
1	0.086501	0.226259	0.083046	0.112415	0.290935
1.00333	0.085515	0.227268	0.084747	0.11473	0.293006
1.00667	0.086958	0.225519	0.084029	0.115212	0.29418
1.01	0.088179	0.226534	0.083944	0.115672	0.292802
1.01333	0.089565	0.227786	0.083984	0.116586	0.292341
1.01667	0.087727	0.228316	0.088009	0.120025	0.293478
1.02	0.091284	0.228405	0.088054	0.119558	0.293883
1.02333	0.088445	0.231122	0.090934	0.122157	0.294797
1.02667	0.088978	0.230652	0.091391	0.125291	0.297448
1.03	0.087461	0.231101	0.093214	0.126583	0.302305
1.03333	0.09091	0.231087	0.092174	0.128124	0.304043
1.03667	0.088188	0.23283	0.093471	0.130611	0.303497
1.04	0.088413	0.233772	0.09169	0.131594	0.305602
1.04333	0.090261	0.234061	0.094548	0.133026	0.304588
1.04667	0.093975	0.235305	0.094153	0.135186	0.302057
1.05	0.089638	0.235916	0.094339	0.136347	0.303394
1.05333	0.090972	0.234986	0.094549	0.138301	0.30396
1.05667	0.095385	0.23627	0.097462	0.139627	0.304482
1.06	0.093132	0.236148	0.096478	0.141239	0.30727
1.06333	0.092277	0.235256	0.097302	0.142802	0.310268
1.06667	0.094009	0.234804	0.097192	0.143651	0.309708
1.07	0.09624	0.235168	0.096455	0.144986	0.313033
1.07333	0.094349	0.233987	0.09469	0.146313	0.316353
1.07667	0.093652	0.236177	0.095436	0.148714	0.31692
1.08	0.091312	0.237487	0.094355	0.151239	0.318405
1.08333	0.092581	0.239273	0.096397	0.1555	0.320421
1.08667	0.089725	0.240143	0.096323	0.158584	0.322007
1.09	0.09078	0.241338	0.09916	0.159673	0.323462
1.09333	0.091016	0.240452	0.099116	0.160943	0.324562
1.09667	0.09304	0.241123	0.102725	0.162968	0.323981
1.1	0.092944	0.241604	0.100769	0.161875	0.325853
1.10333	0.091622	0.242435	0.102057	0.162559	0.326093
1.10667	0.091902	0.242656	0.104248	0.164357	0.32698
1.11	0.095027	0.244456	0.105122	0.16599	0.329547
1.11333	0.097532	0.244276	0.104205	0.168665	0.333867
1.11667	0.098283	0.244124	0.107552	0.170425	0.336318
1.12	0.100367	0.244908	0.107322	0.17254	0.3397
1.12333	0.10062	0.24576	0.107593	0.175378	0.343371
1.12667	0.098	0.246803	0.108336	0.177483	0.342968
1.13	0.094661	0.248337	0.108988	0.17826	0.344593
1.13333	0.095208	0.249898	0.110598	0.180927	0.345893
1.13667	0.096286	0.252193	0.113253	0.184693	0.347399
1.14	0.096397	0.253159	0.113607	0.186337	0.347025
1.14333	0.097244	0.252068	0.114626	0.187911	0.350708
1.14667	0.099502	0.252921	0.117376	0.190975	0.350893
1.15	0.102354	0.253706	0.117108	0.193187	0.352447
1.15333	0.100976	0.252757	0.117676	0.195546	0.354914
1.15667	0.102523	0.253468	0.118195	0.199427	0.355598
1.16	0.102758	0.25498	0.119228	0.20093	0.357689
1.16333	0.101555	0.254362	0.11787	0.202277	0.359973
1.16667	0.102309	0.25589	0.119549	0.204182	0.359589
1.17	0.103175	0.256692	0.122027	0.203003	0.361543
1.17333	0.104905	0.25629	0.121494	0.204882	0.365914
1.17667	0.106948	0.256671	0.122111	0.20821	0.367005
1.18	0.107303	0.259067	0.122059	0.212152	0.369808
1.18333	0.104364	0.25868	0.123479	0.214654	0.374157
1.18667	0.105505	0.259373	0.121705	0.217984	0.37536
1.19	0.104087	0.259996	0.123662	0.220101	0.374732
1.19333	0.104871	0.260621	0.124856	0.222164	0.377672
1.19667	0.105492	0.259085	0.128193	0.222727	0.37782
1.2	0.108346	0.260226	0.128365	0.22399	0.379776
1.20333	0.108961	0.262471	0.130098	0.226498	0.381117
1.20667	0.110619	0.264585	0.131186	0.229729	0.382565
1.21	0.108436	0.266499	0.130683	0.232821	0.383366
1.21333	0.109059	0.268244	0.129651	0.235462	0.388108
1.21667	0.111117	0.269183	0.130054	0.238666	0.390242
1.22	0.111017	0.267657	0.131318	0.242682	0.393268
1.22333	0.107931	0.267437	0.131206	0.244214	0.397558
1.22667	0.114326	0.268145	0.132404	0.246665	0.401987
1.23	0.116693	0.268983	0.13483	0.250259	0.399882
1.23333	0.112471	0.268975	0.134968	0.253268	0.40248
1.23667	0.117811	0.271058	0.135574	0.253271	0.403629
1.24	0.119464	0.270264	0.137767	0.254122	0.405628
1.24333	0.116603	0.270073	0.138974	0.256683	0.405862
1.24667	0.114877	0.270872	0.139013	0.259871	0.410695
1.25	0.116122	0.272739	0.141164	0.262808	0.410548
1.25333	0.112646	0.273214	0.141151	0.26671	0.413379
1.25667	0.114534	0.275716	0.140066	0.270935	0.415184
1.26	0.110692	0.276435	0.141864	0.271672	0.415303
1.26333	0.111506	0.275922	0.14302	0.273007	0.416349
1.26667	0.112161	0.274761	0.142772	0.275365	0.418317
1.27	0.109237	0.275145	0.144926	0.278593	0.420233
1.27333	0.109013	0.276995	0.145289	0.281566	0.422855
1.27667	0.114327	0.278344	0.145948	0.287036	0.425246
1.28	0.11623	0.280905	0.146564	0.288737	0.431821
1.28333	0.115962	0.283543	0.149445	0.291181	0.433352
1.28667	0.119002	0.282828	0.149677	0.29359	0.435912
1.29	0.119246	0.284117	0.152535	0.297398	0.440006
1.29333	0.119889	0.284951	0.153879	0.300386	0.440006
1.29667	0.119186	0.285661	0.156428	0.304963	0.438663
1.3	0.123411	0.2876	0.155893	0.307752	0.442907
1.30333	0.121183	0.290568	0.157562	0.31007	0.443861
1.30667	0.124642	0.290232	0.155463	0.311722	0.445066
1.31	0.123436	0.291298	0.156935	0.315141	0.451109
1.31333	0.126057	0.292282	0.157028	0.317966	0.456503
1.31667	0.123932	0.292416	0.158092	0.322097	0.459632
1.32	0.129012	0.292534	0.15894	0.326788	0.463326
1.32333	0.128067	0.293193	0.163278	0.331727	0.465213
1.32667	0.127729	0.292541	0.163282	0.333188	0.468675
1.33	0.127278	0.293	0.165113	0.336528	0.470286
1.33333	0.129451	0.293913	0.16626	0.340327	0.473924
1.33667	0.128591	0.294358	0.168573	0.343521	0.477075
1.34	0.128988	0.295516	0.165601	0.346653	0.481685
1.34333	0.131311	0.298805	0.168894	0.351637	0.485103
1.34667	0.133075	0.300064	0.167294	0.353801	0.488895
1.35	0.131124	0.300697	0.167807	0.355972	0.491235
1.35333	0.135965	0.302249	0.168188	0.357934	0.493967
1.35667	0.137279	0.304249	0.172151	0.360308	0.495311
1.36	0.136143	0.303054	0.171568	0.362618	0.496981
1.36333	0.131412	0.303476	0.173994	0.368605	0.496117
1.36667	0.135168	0.304025	0.175039	0.373073	0.497012
1.37	0.131526	0.304873	0.177117	0.376791	0.499718
1.37333	0.13155	0.305257	0.179082	0.379619	0.504234
1.37667	0.135161	0.308116	0.180943	0.383267	0.505349
1.38	0.138123	0.309669	0.181234	0.385102	0.507475
1.38333	0.13886	0.310403	0.183995	0.389507	0.512027
1.38667	0.142108	0.311487	0.184547	0.39273	0.515292
1.39	0.142914	0.311799	0.184469	0.397159	0.516099
1.39333	0.144706	0.312731	0.184559	0.400658	0.519571
1.39667	0.142836	0.314097	0.187685	0.403015	0.524471
1.4	0.141023	0.315693	0.187974	0.406826	0.526887
1.40333	0.139111	0.317672	0.188868	0.412036	0.52925
1.40667	0.141394	0.320699	0.191514	0.416921	0.532782
1.41	0.139971	0.321824	0.193328	0.420667	0.536933
1.41333	0.146456	0.323208	0.192072	0.425688	0.539327
1.41667	0.146565	0.323942	0.192588	0.427434	0.5436
1.42	0.146959	0.32422	0.194974	0.430514	0.546593
1.42333	0.146268	0.322503	0.194496	0.435416	0.550493
1.42667	0.146173	0.322441	0.195322	0.438718	0.5541
1.43	0.144562	0.324399	0.198492	0.44356	0.558293
1.43333	0.148674	0.324483	0.199437	0.448284	0.561327
1.43667	0.152295	0.326476	0.199938	0.449735	0.56354
1.44	0.154215	0.327366	0.201718	0.452872	0.565744
1.44333	0.153399	0.3305	0.202665	0.455923	0.568856
1.44667	0.158122	0.329847	0.204783	0.460564	0.569909
1.45	0.15872	0.332419	0.207601	0.464774	0.572469
1.45333	0.154862	0.333678	0.208645	0.470554	0.576782
1.45667	0.154379	0.335918	0.210494	0.475047	0.579433
1.46	0.15732	0.335045	0.212374	0.481073	0.581162
1.46333	0.157093	0.335476	0.212951	0.484348	0.585669
1.46667	0.155539	0.336083	0.21322	0.487323	0.588213
1.47	0.159216	0.337459	0.212569	0.491628	0.59053
1.47333	0.159045	0.338188	0.213636	0.493863	0.593577
1.47667	0.157604	0.340925	0.215666	0.498929	0.59653
1.48	0.154845	0.342759	0.215695	0.501639	0.599512
1.48333	0.1558	0.344126	0.21874	0.509396	0.60496
1.48667	0.156907	0.344516	0.22167	0.513011	0.610876
1.49	0.158691	0.345124	0.223146	0.517328	0.613988
1.49333	0.159917	0.345417	0.224679	0.520272	0.618868
1.49667	0.165583	0.347099	0.226009	0.52603	0.622311
1.5	0.169034	0.348368	0.226813	0.52726	0.626472
1.50333	0.171509	0.348658	0.228491	0.531152	0.627233
1.50667	0.173273	0.352461	0.229192	0.536746	0.631447
1.51	0.173958	0.352789	0.229507	0.540238	0.636114
1.51333	0.174283	0.354897	0.230708	0.546133	0.64061
1.51667	0.174306	0.354646	0.232997	0.550213	0.643764
1.52	0.17209	0.357134	0.234216	0.55655	0.651674
1.52333	0.171922	0.355513	0.237198	0.561074	0.655493
1.52667	0.175229	0.356647	0.23788	0.567112	0.657289
1.53	0.173058	0.356793	0.241664	0.570669	0.65745
1.53333	0.172085	0.359421	0.241575	0.578072	0.658562
1.53667	0.173734	0.360772	0.243156	0.582213	0.659998
1.54	0.173584	0.361803	0.242082	0.587375	0.662211
1.54333	0.173872	0.363709	0.244889	0.59198	0.665411
1.54667	0.174121	0.362958	0.243737	0.597725	0.67205
1.55	0.174273	0.364076	0.244098	0.602104	0.675814
1.55333	0.173165	0.364612	0.244664	0.607291	0.680016
1.55667	0.174779	0.368536	0.246967	0.612188	0.684093
1.56	0.179389	0.369941	0.247896	0.616678	0.690037
1.56333	0.183205	0.373102	0.251428	0.620077	0.695007
1.56667	0.183518	0.372933	0.253577	0.625414	0.702106
1.57	0.18955	0.37477	0.255412	0.630353	0.70599
1.57333	0.191173	0.374436	0.258833	0.635359	0.711035
1.57667	0.187244	0.376513	0.260592	0.640451	0.71473
1.58	0.189086	0.380071	0.26152	0.646828	0.716526
1.58333	0.188719	0.383623	0.262486	0.64889	0.717914
1.58667	0.187557	0.384512	0.264158	0.65563	0.721076
1.59	0.190629	0.386108	0.265133	0.660643	0.722843
1.59333	0.193276	0.386706	0.266253	0.667532	0.726939
1.59667	0.194121	0.384688	0.268059	0.670866	0.73153
1.6	0.200234	0.386356	0.273141	0.678488	0.736873
1.60333	0.202473	0.38655	0.275055	0.683136	0.741611
1.60667	0.201608	0.38901	0.277817	0.686364	0.747408
1.61	0.201948	0.390425	0.281309	0.690632	0.753063
1.61333	0.199041	0.393623	0.28112	0.694838	0.758909
1.61667	0.200587	0.393647	0.279653	0.700778	0.760883
1.62	0.2015	0.396766	0.280388	0.706045	0.766153
1.62333	0.198913	0.39666	0.281661	0.714733	0.772135
1.62667	0.200244	0.399076	0.280521	0.717691	0.772829
1.63	0.203247	0.399739	0.284469	0.726377	0.77509
1.63333	0.203598	0.401313	0.285381	0.730351	0.783087
1.63667	0.203588	0.401786	0.289365	0.735879	0.786472
1.64	0.21076	0.40465	0.29113	0.73976	0.789531
1.64333	0.210373	0.405422	0.293701	0.745845	0.794633
1.64667	0.213881	0.406486	0.292419	0.749898	0.800145
1.65	0.21758	0.408381	0.2959	0.75578	0.801279
1.65333	0.221123	0.411735	0.295789	0.760146	0.806911
1.65667	0.217717	0.413174	0.297223	0.765247	0.811037
1.66	0.218144	0.413776	0.298793	0.773533	0.817159
1.66333	0.213976	0.416198	0.300973	0.779145	0.823023
1.66667	0.212301	0.417699	0.302008	0.785302	0.83156
1.67	0.212234	0.41713	0.303362	0.793938	0.834901
1.67333	0.216296	0.416842	0.304211	0.800234	0.84032
1.67667	0.220967	0.419983	0.305862	0.803937	0.845335
1.68	0.223507	0.421218	0.308977	0.811069	0.848824
1.68333	0.22705	0.42097	0.309605	0.817219	0.84966
1.68667	0.227239	0.423594	0.311861	0.820592	0.854611
1.69	0.22805	0.426655	0.313247	0.828274	0.861159
1.69333	0.229784	0.427636	0.313659	0.834247	0.864263
1.69667	0.230347	0.429893	0.314532	0.839503	0.870498
1.7	0.233017	0.432399	0.315601	0.844201	0.876658
1.70333	0.236129	0.432913	0.317752	0.84979	0.882403
1.70667	0.235472	0.433928	0.320015	0.853971	0.884831
1.71	0.235271	0.434958	0.322663	0.860341	0.89103
1.71333	0.237098	0.437638	0.324045	0.866625	0.895389
1.71667	0.235118	0.438801	0.326383	0.874011	0.899816
1.72	0.23318	0.440856	0.324894	0.880855	0.904974
1.72333	0.236514	0.443719	0.326264	0.886761	0.910622
1.72667	0.237319	0.444449	0.32938	0.891384	0.915909
1.73	0.238814	0.444428	0.333183	0.895529	0.922331
1.73333	0.241934	0.446923	0.337193	0.902985	0.92879
1.73667	0.243298	0.448741	0.341135	0.910077	0.931562
1.74	0.244105	0.449868	0.343392	0.917326	0.937928
1.74333	0.246812	0.452277	0.345596	0.927803	0.942974
1.74667	0.248846	0.455624	0.34785	0.935123	0.947606
1.75	0.248467	0.45824	0.350717	0.942215	0.953838
1.75333	0.255315	0.460472	0.354768	0.94632	0.957624
1.75667	0.257229	0.462135	0.355426	0.950795	0.962847
1.76	0.253769	0.463385	0.357207	0.955006	0.966514
1.76333	0.253912	0.465185	0.357426	0.959935	0.973538
1.76667	0.254153	0.466083	0.358204	0.966701	0.976079
1.77	0.253056	0.468329	0.357742	0.974564	0.982106
1.77333	0.252132	0.469351	0.361238	0.980892	0.987047
1.77667	0.259179	0.473314	0.363869	0.98798	0.993611
1.78	0.262726	0.472212	0.366091	0.996904	0.998276
1.78333	0.264318	0.474079	0.366944	1.00294	1.00575
1.78667	0.266753	0.474357	0.370059	1.00967	1.01375
1.79	0.268907	0.477088	0.371716	1.01711	1.01873
1.79333	0.267244	0.477356	0.371789	1.02487	1.0209
1.79667	0.264589	0.481919	0.374397	1.02991	1.02646
1.8	0.268371	0.484874	0.376705	1.03538	1.03213
1.80333	0.265979	0.487152	0.377651	1.04238	1.03697
1.80667	0.269545	0.488811	0.380244	1.04896	1.04246
1.81	0.272937	0.492078	0.383757	1.05474	1.05093
1.81333	0.275947	0.492887	0.384369	1.06378	1.05299
1.81667	0.276987	0.493877	0.38609	1.07142	1.05633
1.82	0.281414	0.494293	0.388126	1.07691	1.06281
1.82333	0.281047	0.496999	0.389507	1.08234	1.06878
1.82667	0.280805	0.49853	0.391319	1.08926	1.07565
1.83	0.281362	0.502034	0.394977	1.09549	1.08274
1.83333	0.281076	0.501838	0.39797	1.10343	1.09002
1.83667	0.284397	0.505567	0.401675	1.11036	1.09492
1.84	0.283626	0.50578	0.403451	1.11868	1.09963
1.84333	0.288896	0.507256	0.405164	1.127	1.10606
1.84667	0.291931	0.508236	0.407988	1.13301	1.11128
1.85	0.292823	0.512274	0.41149	1.13674	1.11683
1.85333	0.29094	0.514004	0.41221	1.14625	1.12301
1.85667	0.294998	0.517179	0.414485	1.1546	1.13017
1.86	0.295095	0.517507	0.416069	1.16121	1.13494
1.86333	0.298511	0.520029	0.418466	1.16987	1.14298
1.86667	0.299448	0.520967	0.419161	1.17857	1.14908
1.87	0.297981	0.523196	0.419938	1.1836	1.15454
1.87333	0.296801	0.52384	0.422305	1.19042	1.1611
1.87667	0.296344	0.527801	0.424613	1.19792	1.16638
1.88	0.295569	0.530091	0.425847	1.20453	1.17076
1.88333	0.298145	0.532429	0.428923	1.21217	1.17635
1.88667	0.302033	0.532429	0.432529	1.22134	1.18212
1.89	0.306058	0.536457	0.436081	1.22775	1.188
1.89333	0.308486	0.538727	0.438387	1.23381	1.19257
1.89667	0.308559	0.540284	0.440696	1.24092	1.20222
1.9	0.308192	0.543191	0.442839	1.24753	1.20909
1.90333	0.309054	0.546173	0.444735	1.25315	1.21585
1.90667	0.309586	0.545696	0.445746	1.26227	1.22154
1.91	0.309212	0.549324	0.449764	1.26962	1.22801
1.91333	0.31108	0.55048	0.451625	1.27708	1.23243
1.91667	0.316238	0.55175	0.451711	1.28644	1.23837
1.92	0.31841	0.55512	0.454168	1.29554	1.24407
1.92333	0.320992	0.557164	0.45856	1.30045	1.25091
1.92667	0.325999	0.556264	0.458428	1.309	1.25561
1.93	0.328623	0.56094	0.462008	1.31719	1.25998
1.93333	0.325883	0.564429	0.46442	1.32513	1.26713
1.93667	0.325167	0.566629	0.467963	1.33319	1.27365
1.94	0.327189	0.569472	0.468736	1.3431	1.27959
1.94333	0.324953	0.572387	0.47126	1.3515	1.28752
1.94667	0.328097	0.571443	0.472052	1.35849	1.29689
1.95	0.334545	0.574769	0.475322	1.36508	1.30451
1.95333	0.339769	0.575668	0.475325	1.37254	1.31352
1.95667	0.344466	0.579372	0.47571	1.37958	1.32038
1.96	0.348851	0.582943	0.480089	1.38663	1.32761
1.96333	0.347647	0.587926	0.48235	1.3944	1.33224
1.96667	0.344962	0.587417	0.485649	1.40222	1.33851
1.97	0.342215	0.590747	0.488832	1.40932	1.34319
1.97333	0.342008	0.591023	0.492319	1.41645	1.34758
1.97667	0.34339	0.593164	0.493061	1.42216	1.35602
1.98	0.347417	0.593074	0.494169	1.42926	1.36312
1.98333	0.352232	0.596954	0.496463	1.43722	1.36829
1.98667	0.356883	0.598717	0.500153	1.44551	1.37451
1.99	0.359194	0.602631	0.504464	1.45604	1.3849
1.99333	0.361152	0.604467	0.50699	1.46624	1.3936
1.99667	0.361334	0.607864	0.511429	1.47477	1.40174
2	0.363272	0.608677	0.512404	1.48299	1.40861
2.00333	0.367047	0.612515	0.514497	1.49176	1.4137
2.00667	0.364468	0.613727	0.514647	1.50032	1.42019
2.01	0.365457	0.616763	0.518903	1.50762	1.424
2.01333	0.368084	0.618772	0.51983	1.51517	1.42793
2.01667	0.369079	0.621727	0.523682	1.52282	1.4356
2.02	0.368519	0.622233	0.525806	1.52965	1.4441
2.02333	0.372457	0.625466	0.529337	1.53636	1.45152
2.02667	0.375177	0.62696	0.531263	1.54639	1.45857
2.03	0.375218	0.628855	0.532863	1.55705	1.4701
2.03333	0.375776	0.630982	0.535811	1.56631	1.47695
2.03667	0.378048	0.633	0.538302	1.5741	1.48452
2.04	0.379123	0.634565	0.54079	1.5813	1.49302
2.04333	0.381003	0.637951	0.543145	1.5879	1.50254
2.04667	0.385247	0.640498	0.54644	1.59491	1.50806
2.05	0.389453	0.643128	0.550756	1.60282	1.51555
2.05333	0.393404	0.646872	0.55207	1.61123	1.52471
2.05667	0.397892	0.648867	0.554956	1.62059	1.53021
2.06	0.399889	0.649242	0.556145	1.628	1.53619
2.06333	0.396759	0.651004	0.561028	1.63886	1.54073
2.06667	0.400017	0.652652	0.561077	1.65049	1.54971
2.07	0.398654	0.653668	0.566021	1.65864	1.5545
2.07333	0.401277	0.655736	0.566706	1.66699	1.56329
2.07667	0.403104	0.658458	0.570871	1.67628	1.57107
2.08	0.409249	0.65969	0.572721	1.68271	1.58103
2.08333	0.412169	0.663419	0.575617	1.68729	1.5871
2.08667	0.415368	0.666563	0.577649	1.69585	1.59488
2.09	0.411976	0.668889	0.580139	1.7049	1.60082
2.09333	0.413501	0.672746	0.580817	1.71359	1.60802
2.09667	0.419485	0.676607	0.583816	1.72215	1.61674
2.1	0.418237	0.679056	0.58586	1.73267	1.6244
2.10333	0.422758	0.681253	0.588234	1.74206	1.63325
2.10667	0.428019	0.685111	0.59174	1.75067	1.64113
2.11	0.430748	0.685622	0.59472	1.75903	1.65024
2.11333	0.430674	0.68952	0.596293	1.76621	1.65558
2.11667	0.432702	0.690934	0.599239	1.77465	1.66339
2.12	0.429995	0.692599	0.601058	1.78447	1.6715
2.12333	0.431466	0.695078	0.604402	1.7925	1.67837
2.12667	0.433168	0.700362	0.608642	1.80358	1.68487
2.13	0.437294	0.70229	0.611728	1.81352	1.69396
2.13333	0.438264	0.705731	0.613828	1.82336	1.70172
2.13667	0.442228	0.710884	0.617461	1.83132	1.70718
2.14	0.44442	0.713826	0.620313	1.84158	1.7181
2.14333	0.447176	0.713086	0.621235	1.84691	1.72706
2.14667	0.448345	0.716448	0.625826	1.85822	1.7363
2.15	0.451854	0.71856	0.630399	1.86594	1.74532
2.15333	0.456035	0.721038	0.632459	1.87533	1.75706
2.15667	0.457773	0.723168	0.636426	1.88392	1.76358
2.16	0.4606	0.727473	0.639438	1.89514	1.77151
2.16333	0.45851	0.728715	0.64121	1.90001	1.77892
2.16667	0.459983	0.731763	0.642588	1.91066	1.78413
2.17	0.461651	0.732639	0.64514	1.91953	1.79038
2.17333	0.465807	0.735502	0.647267	1.92864	1.79644
2.17667	0.464662	0.738784	0.649749	1.93775	1.8031
2.18	0.466398	0.743037	0.65061	1.94857	1.81405
2.18333	0.467477	0.745766	0.654971	1.95637	1.82267
2.18667	0.468203	0.750338	0.658518	1.96529	1.82902
2.19	0.469417	0.753741	0.662836	1.9734	1.83716
2.19333	0.472125	0.756355	0.66548	1.98265	1.8465
2.19667	0.476247	0.758507	0.669007	1.99237	1.85232
2.2	0.480727	0.761709	0.670506	2.00154	1.8607
2.20333	0.483417	0.763198	0.674356	2.01044	1.87001
2.20667	0.481153	0.765083	0.676185	2.02205	1.87799
2.21	0.488578	0.768535	0.680655	2.03158	1.88391
2.21333	0.493423	0.771843	0.685119	2.04098	1.89309
2.21667	0.494246	0.773419	0.688074	2.04963	1.90189
2.22	0.495951	0.777813	0.69053	2.0582	1.90786
2.22333	0.502495	0.780638	0.692504	2.06403	1.91817
2.22667	0.502657	0.781622	0.692795	2.07346	1.92896
2.23	0.500939	0.785807	0.697187	2.08186	1.93961
2.23333	0.503364	0.788427	0.700957	2.09213	1.94713
2.23667	0.505224	0.790589	0.705115	2.10234	1.95771
2.24	0.506871	0.794301	0.70667	2.11366	1.96495
2.24333	0.507307	0.797912	0.713245	2.123	1.97051
2.24667	0.510122	0.797924	0.711761	2.13353	1.9787
2.25	0.51557	0.802253	0.714154	2.14413	1.99037
2.25333	0.517878	0.804192	0.714843	2.15287	1.9969
2.25667	0.517448	0.807087	0.717105	2.16245	2.00443
2.26	0.521236	0.810678	0.719408	2.171	2.01437
2.26333	0.525539	0.814949	0.725483	2.1802	2.02102
2.26667	0.523015	0.81717	0.729015	2.18957	2.02771
2.27	0.5275	0.821398	0.7326	2.19913	2.03798
2.27333	0.532049	0.824226	0.739144	2.21054	2.04852
2.27667	0.533011	0.827756	0.741673	2.22118	2.05929
2.28	0.536854	0.830005	0.745073	2.23069	2.06993
2.28333	0.540104	0.832142	0.749235	2.23985	2.07834
2.28667	0.542188	0.835402	0.750669	2.24827	2.08707
2.29	0.545492	0.837453	0.75444	2.25854	2.09658
2.29333	0.546382	0.839263	0.75859	2.26822	2.10493
2.29667	0.546688	0.84243	0.758507	2.27762	2.11268
2.3	0.551469	0.846311	0.762009	2.28822	2.12111
2.30333	0.554802	0.848921	0.766167	2.29998	2.12926
2.30667	0.558917	0.851626	0.767998	2.30813	2.13741
2.31	0.56126	0.854508	0.771052	2.31815	2.14566
2.31333	0.561261	0.858706	0.775885	2.32591	2.15448
2.31667	0.562344	0.861528	0.778974	2.33346	2.16273
2.32	0.563804	0.864514	0.783126	2.34309	2.17136
2.32333	0.563726	0.869136	0.785114	2.35055	2.18173
2.32667	0.566771	0.872513	0.788105	2.36011	2.19005
2.33	0.572755	0.874703	0.793071	2.37103	2.19936
2.33333	0.575663	0.876948	0.794996	2.38141	2.20727
2.33667	0.576613	0.88044	0.796629	2.3917	2.21783
2.34	0.577136	0.882399	0.803844	2.40438	2.22514
2.34333	0.577135	0.885363	0.807446	2.41495	2.23535
2.34667	0.578661	0.888732	0.809521	2.42538	2.2447
2.35	0.582051	0.891639	0.812541	2.43687	2.25738
2.35333	0.583031	0.89237	0.816524	2.44522	2.26597
2.35667	0.589281	0.898035	0.816036	2.45475	2.27597
2.36	0.596348	0.900264	0.818275	2.46339	2.28414
2.36333	0.594028	0.902493	0.822453	2.47267	2.29139
2.36667	0.595596	0.908171	0.827521	2.48261	2.30139
2.37	0.599359	0.912941	0.831732	2.4938	2.3116
2.37333	0.604276	0.913158	0.836672	2.5027	2.31938
2.37667	0.606356	0.91753	0.840638	2.51204	2.33041
2.38	0.614681	0.921204	0.843867	2.52275	2.34252
2.38333	0.61742	0.922747	0.846003	2.5309	2.34978
2.38667	0.620415	0.926612	0.847842	2.53983	2.35844
2.39	0.620483	0.930398	0.850729	2.54944	2.36845
2.39333	0.62193	0.933527	0.854679	2.56139	2.37912
2.39667	0.621886	0.937701	0.858181	2.57068	2.39075
2.4	0.62535	0.940396	0.861549	2.58088	2.39888
2.40333	0.629422	0.941325	0.865808	2.59076	2.4077
2.40667	0.629684	0.946257	0.867891	2.60299	2.41802
2.41	0.631853	0.948811	0.870127	2.60977	2.42523
2.41333	0.631192	0.951893	0.871904	2.6186	2.43346
2.41667	0.635059	0.956132	0.873862	2.62808	2.44382
2.42	0.634642	0.962288	0.87859	2.63875	2.45499
2.42333	0.639236	0.9653	0.882861	2.64674	2.46195
2.42667	0.64242	0.969897	0.887362	2.65738	2.47116
2.43	0.647058	0.973081	0.892923	2.66587	2.47897
2.43333	0.648126	0.977282	0.899355	2.67696	2.48728
2.43667	0.650277	0.979944	0.902655	2.68503	2.49433
2.44	0.650574	0.979928	0.909476	2.69617	2.50629
2.44333	0.652417	0.982328	0.910797	2.70917	2.5142
2.44667	0.657337	0.982737	0.912382	2.72222	2.52631
2.45	0.658235	0.986655	0.914626	2.73063	2.53897
2.45333	0.663947	0.988267	0.91483	2.74419	2.54917
2.45667	0.672434	0.993796	0.914673	2.75611	2.55809
2.46	0.677132	0.997118	0.921306	2.76338	2.57068
2.46333	0.680252	1.00214	0.924534	2.77219	2.57741
2.46667	0.683594	1.00262	0.927535	2.78388	2.5863
2.47	0.683988	1.00668	0.934108	2.79301	2.59583
2.47333	0.68355	1.01083	0.937735	2.80277	2.60538
2.47667	0.683278	1.01525	0.940519	2.81431	2.61394
2.48	0.684369	1.01908	0.945225	2.82684	2.62403
2.48333	0.687887	1.02391	0.95031	2.83697	2.63139
2.48667	0.689536	1.02803	0.95277	2.84908	2.64078
2.49	0.692763	1.03103	0.956685	2.8576	2.64867
2.49333	0.696398	1.03221	0.958419	2.86873	2.6579
2.49667	0.700291	1.03633	0.961913	2.87792	2.66756
2.5	0.703521	1.03889	0.965628	2.88826	2.6795
2.50333	0.708383	1.04194	0.970334	2.89688	2.69177
2.50667	0.710782	1.04647	0.973661	2.91028	2.70233
2.51	0.713044	1.05091	0.979721	2.91865	2.71256
2.51333	0.715722	1.05398	0.98354	2.92867	2.72356
2.51667	0.717372	1.05928	0.984525	2.93906	2.73587
2.52	0.721752	1.0625	0.987431	2.94835	2.74306
2.52333	0.725496	1.06541	0.992868	2.95553	2.75652
2.52667	0.731057	1.06918	0.994295	2.9665	2.7634
2.53	0.733046	1.07181	0.998916	2.97818	2.77315
2.53333	0.733752	1.07367	1.00506	2.98819	2.78102
2.53667	0.738121	1.07762	1.00728	2.99924	2.79086
2.54	0.737946	1.08015	1.00984	3.01029	2.80004
2.54333	0.737695	1.0845	1.01651	3.02062	2.81228
2.54667	0.744141	1.08858	1.02023	3.03128	2.82675
2.55	0.748706	1.09303	1.02297	3.04006	2.83844
2.55333	0.748453	1.09601	1.02982	3.04925	2.85048
2.55667	0.75257	1.09982	1.03394	3.0603	2.85947
2.56	0.759061	1.10129	1.0368	3.07133	2.86946
2.56333	0.759595	1.10557	1.04069	3.07952	2.87333
2.56667	0.761912	1.10762	1.04381	3.09095	2.87944
2.57	0.766989	1.11182	1.04533	3.10345	2.89099
2.57333	0.767921	1.11467	1.04854	3.11378	2.89953
2.57667	0.769536	1.12031	1.05062	3.12177	2.9099
2.58	0.772353	1.12455	1.05289	3.13272	2.9255
2.58333	0.778203	1.1276	1.05769	3.14238	2.93805
2.58667	0.779379	1.13114	1.06193	3.15328	2.94862
2.59	0.78413	1.13447	1.06756	3.16305	2.95789
2.59333	0.786824	1.13841	1.07409	3.17428	2.96692
2.59667	0.788232	1.14227	1.0796	3.18324	2.9743
2.6	0.791277	1.14655	1.08306	3.19615	2.98403
2.60333	0.791056	1.15175	1.08715	3.20546	2.99259
2.60667	0.792832	1.15572	1.09008	3.21626	3.00741
2.61	0.794771	1.1592	1.09181	3.22773	3.01747
2.61333	0.797113	1.16239	1.0942	3.23933	3.02739
2.61667	0.798533	1.16795	1.09808	3.24767	3.03862
2.62	0.803244	1.17075	1.10042	3.25939	3.04764
2.62333	0.803543	1.17577	1.10472	3.26884	3.05625
2.62667	0.806949	1.17956	1.10769	3.28009	3.06578
2.63	0.810377	1.18487	1.11255	3.29296	3.07783
2.63333	0.810257	1.18859	1.11436	3.30415	3.08713
2.63667	0.81465	1.19063	1.11872	3.31322	3.09919
2.64	0.821661	1.19568	1.12203	3.3253	3.10982
2.64333	0.823662	1.19728	1.12631	3.33444	3.12302
2.64667	0.826415	1.19922	1.13063	3.34218	3.1331
2.65	0.831628	1.20257	1.13494	3.3533	3.14399
2.65333	0.831158	1.20786	1.13756	3.36301	3.15604
2.65667	0.832176	1.21148	1.13994	3.37155	3.16762
2.66	0.835918	1.21683	1.14373	3.38258	3.17797
2.66333	0.83768	1.22161	1.14714	3.39314	3.18765
2.66667	0.841551	1.22527	1.15306	3.40226	3.19634
2.67	0.845548	1.22979	1.15707	3.41465	3.20554
2.67333	0.847692	1.2331	1.16085	3.42475	3.21544
2.67667	0.850698	1.23597	1.16379	3.43583	3.22189
2.68	0.854675	1.24157	1.1675	3.44692	3.23266
2.68333	0.855755	1.24549	1.16949	3.45722	3.24643
2.68667	0.862709	1.24881	1.17462	3.46697	3.25589
2.69	0.867126	1.25276	1.18016	3.47831	3.26667
2.69333	0.870096	1.25746	1.18572	3.49003	3.28141
2.69667	0.874603	1.26159	1.1893	3.50091	3.29203
2.7	0.878891	1.26508	1.19474	3.51172	3.30103
2.70333	0.878589	1.26827	1.20023	3.52094	3.31326
2.70667	0.879509	1.27165	1.20319	3.53334	3.32249
2.71	0.884478	1.276	1.2076	3.54137	3.3311
2.71333	0.882957	1.27686	1.21137	3.55341	3.34391
2.71667	0.886096	1.28019	1.21609	3.56487	3.35287
2.72	0.890333	1.28456	1.21578	3.57524	3.36254
2.72333	0.892627	1.28908	1.21922	3.58498	3.37518
2.72667	0.893653	1.29271	1.22364	3.5949	3.38471
2.73	0.900101	1.29814	1.22853	3.60379	3.39162
2.73333	0.901024	1.30435	1.23006	3.61378	3.40688
2.73667	0.90276	1.30806	1.23866	3.62476	3.41788
2.74	0.906108	1.31168	1.24315	3.63301	3.4292
2.74333	0.909343	1.31533	1.24844	3.64347	3.43977
2.74667	0.911792	1.31884	1.25291	3.65305	3.45162
2.75	0.918219	1.32178	1.25983	3.66347	3.45796
2.75333	0.924287	1.32627	1.2642	3.67453	3.4683
2.75667	0.928455	1.33104	1.27034	3.68793	3.47776
2.76	0.930591	1.33408	1.27296	3.69895	3.4893
2.76333	0.9352	1.33815	1.27796	3.71033	3.49769
2.76667	0.936382	1.34277	1.28043	3.72215	3.51002
2.77	0.93359	1.34627	1.28415	3.73133	3.51926
2.77333	0.935454	1.35138	1.28588	3.74301	3.53105
2.77667	0.940563	1.3565	1.29064	3.75201	3.54371
2.78	0.937878	1.35937	1.29291	3.76293	3.55435
2.78333	0.939964	1.3612	1.29782	3.77244	3.56533
2.78667	0.946741	1.36695	1.30164	3.78193	3.57992
2.79	0.950344	1.37079	1.30872	3.79241	3.59366
2.79333	0.952383	1.37459	1.31291	3.8036	3.60328
2.79667	0.962822	1.38073	1.31756	3.81362	3.61509
2.8	0.966166	1.38704	1.32039	3.82516	3.62378
2.80333	0.968815	1.39073	1.32331	3.83736	3.6344
2.80667	0.974567	1.39315	1.32674	3.84683	3.64515
2.81	0.977749	1.39778	1.32875	3.85774	3.6549
2.81333	0.978088	1.40126	1.3332	3.86688	3.66878
2.81667	0.982924	1.40433	1.33757	3.87769	3.68131
2.82	0.984783	1.40675	1.34249	3.88863	3.69193
2.82333	0.987966	1.41314	1.34625	3.89791	3.70132
2.82667	0.987921	1.41875	1.35089	3.90875	3.71073
2.83	0.994539	1.42258	1.35584	3.91947	3.72295
2.83333	0.998371	1.42805	1.36172	3.92805	3.73513
2.83667	1.00206	1.43516	1.36735	3.93767	3.74544
2.84	1.00312	1.43854	1.37234	3.94827	3.7546
2.84333	1.01117	1.44005	1.37561	3.95843	3.76458
2.84667	1.01225	1.44578	1.37917	3.97132	3.77227
2.85	1.01557	1.44953	1.38249	3.98187	3.7806
2.85333	1.0214	1.45301	1.38669	3.9937	3.79025
2.85667	1.02675	1.45764	1.38945	4.00534	3.80148
2.86	1.02642	1.46338	1.39457	4.0148	3.81399
2.86333	1.03066	1.46645	1.39863	4.02388	3.8256
2.86667	1.03442	1.47284	1.40261	4.03604	3.83794
2.87	1.03706	1.47703	1.40629	4.04631	3.848
2.87333	1.03805	1.4814	1.41408	4.05569	3.86059
2.87667	1.04398	1.48714	1.41862	4.06683	3.87014
2.88	1.04889	1.49216	1.42421	4.07788	3.88162
2.88333	1.05055	1.49511	1.43161	4.08929	3.88941
2.88667	1.05373	1.4991	1.43389	4.09923	3.90048
2.89	1.05862	1.50288	1.43669	4.10952	3.91171
2.89333	1.06415	1.5067	1.44102	4.1192	3.92211
2.89667	1.06579	1.50988	1.44509	4.12828	3.93405
2.9	1.06932	1.51285	1.44495	4.13665	3.94834
2.90333	1.07399	1.51736	1.45329	4.14844	3.96109
2.90667	1.07659	1.52116	1.45538	4.15785	3.97051
2.91	1.07841	1.52504	1.46031	4.1681	3.98345
2.91333	1.08165	1.5295	1.46726	4.17844	3.99226
2.91667	1.08567	1.53381	1.475	4.18876	4.0026
2.92	1.08543	1.539	1.47822	4.1975	4.01263
2.92333	1.08907	1.54497	1.48494	4.21008	4.02391
2.92667	1.09272	1.54824	1.49096	4.22097	4.03246
2.93	1.09706	1.55345	1.49336	4.2305	4.04285
2.93333	1.0996	1.55828	1.49609	4.24046	4.05383
2.93667	1.10348	1.56067	1.50068	4.25259	4.06644
2.94	1.10753	1.5643	1.5028	4.26206	4.07689
2.94333	1.10929	1.57003	1.50656	4.27214	4.08986
2.94667	1.1118	1.57527	1.50888	4.28335	4.10262
2.95	1.11421	1.57916	1.51417	4.29556	4.11316
2.95333	1.11891	1.58421	1.51597	4.30442	4.12188
2.95667	1.12253	1.58762	1.52319	4.31588	4.13143
2.96	1.12437	1.59214	1.52632	4.32799	4.14177
2.96333	1.12829	1.59639	1.53469	4.33753	4.15116
2.96667	1.13522	1.6015	1.54094	4.34688	4.16142
2.97	1.13735	1.6082	1.54688	4.35898	4.1723
2.97333	1.1387	1.6103	1.55144	4.3691	4.1834
2.97667	1.14513	1.61441	1.55887	4.37835	4.19541
2.98	1.14604	1.61713	1.56144	4.38833	4.20516
2.98333	1.1457	1.62194	1.56424	4.39675	4.21666
2.98667	1.1497	1.62373	1.56934	4.404	4.22848
2.99	1.15451	1.63084	1.57347	4.41669	4.24075
2.99333	1.15396	1.63514	1.57477	4.42323	4.25199
2.99667	1.15925	1.63952	1.57973	4.43538	4.26476
3	1.16407	1.64365	1.58598	4.44577	4.27252
3.00333	1.16831	1.64949	1.59174	4.45709	4.2859
3.00667	1.17021	1.65252	1.59849	4.46402	4.29419
3.01	1.17874	1.65713	1.60434	4.47981	4.30539
3.01333	1.18324	1.66471	1.60685	4.49102	4.31569
3.01667	1.18477	1.66915	1.61301	4.50268	4.32933
3.02	1.18935	1.67319	1.61842	4.51388	4.3372
3.02333	1.19796	1.67912	1.62311	4.52407	4.34915
3.02667	1.20096	1.68413	1.62784	4.53216	4.35908
3.03	1.20467	1.68693	1.6344	4.53904	4.37056
3.03333	1.21154	1.69148	1.63796	4.54891	4.38195
3.03667	1.21599	1.6973	1.64071	4.55814	4.38901
3.04	1.21587	1.70142	1.64469	4.56916	4.39841
3.04333	1.21734	1.70533	1.64827	4.57928	4.40985
3.04667	1.21893	1.70943	1.65545	4.59237	4.41736
3.05	1.21982	1.71495	1.65746	4.59927	4.42721
3.05333	1.22335	1.71944	1.66183	4.61074	4.44033
3.05667	1.22631	1.72371	1.66634	4.62248	4.45325
3.06	1.23032	1.72842	1.67174	4.63153	4.46156
3.06333	1.23669	1.73445	1.67551	4.64015	4.47544
3.06667	1.24066	1.73793	1.68138	4.65269	4.4828
3.07	1.24246	1.74305	1.68695	4.66368	4.49599
3.07333	1.24683	1.74782	1.69183	4.67275	4.50468
3.07667	1.24829	1.75248	1.69628	4.68382	4.51528
3.08	1.25091	1.75497	1.69915	4.69317	4.52368
3.08333	1.25343	1.75911	1.70381	4.70198	4.53718
3.08667	1.25462	1.76351	1.70917	4.70885	4.54574
3.09	1.25737	1.76946	1.71525	4.71746	4.55823
3.09333	1.26111	1.77394	1.71793	4.72611	4.56833
3.09667	1.26629	1.77874	1.72334	4.73702	4.5799
3.1	1.27216	1.78426	1.72795	4.74633	4.58968
3.10333	1.27878	1.78875	1.73406	4.75824	4.60319
3.10667	1.28363	1.79137	1.73902	4.76813	4.61367
3.11	1.28743	1.79709	1.74715	4.7774	4.6273
3.11333	1.28848	1.80148	1.75119	4.78887	4.63913
3.11667	1.29035	1.80668	1.75893	4.79997	4.64932
3.12	1.29301	1.8113	1.7616	4.80874	4.6586
3.12333	1.29762	1.81845	1.76643	4.82148	4.66772
3.12667	1.30278	1.82478	1.76901	4.83015	4.67963
3.13	1.30843	1.83091	1.77472	4.83699	4.6887
3.13333	1.31347	1.83533	1.77723	4.84933	4.69803
3.13667	1.31481	1.84055	1.78236	4.86074	4.70737
3.14	1.3166	1.84424	1.78747	4.86852	4.71792
3.14333	1.32157	1.84765	1.79276	4.8827	4.72594
3.14667	1.32081	1.85145	1.79732	4.89415	4.73689
3.15	1.32466	1.85724	1.80449	4.90166	4.74858
3.15333	1.32957	1.86269	1.80901	4.91151	4.75932
3.15667	1.33367	1.868	1.81297	4.92069	4.77178
3.16	1.33128	1.87219	1.82194	4.92695	4.78289
3.16333	1.33686	1.87819	1.82637	4.93721	4.79246
3.16667	1.34118	1.88132	1.82862	4.94646	4.80384
3.17	1.34375	1.88569	1.83441	4.95384	4.81233
3.17333	1.34952	1.88849	1.83939	4.9654	4.8227
3.17667	1.35824	1.89555	1.84151	4.97774	4.83251
3.18	1.36283	1.89914	1.84824	4.98658	4.84297
3.18333	1.36621	1.90567	1.85506	4.99877	4.85366
3.18667	1.37276	1.9114	1.85858	5.00955	4.86716
3.19	1.37378	1.91816	1.8614	5.01962	4.87634
3.19333	1.37392	1.9203	1.86689	5.0271	4.8827
3.19667	1.37746	1.92759	1.86932	5.03849	4.89548
3.2	1.38137	1.93229	1.87258	5.0473	4.90474
3.20333	1.38442	1.9366	1.87805	5.05764	4.91149
3.20667	1.38608	1.94195	1.8836	5.065	4.92246
3.21	1.39349	1.94736	1.88755	5.07518	4.93437
3.21333	1.39975	1.95161	1.89416	5.08351	4.94384
3.21667	1.4002	1.9569	1.90018	5.09291	4.95426
3.22	1.40225	1.96055	1.9067	5.10039	4.96485
3.22333	1.4089	1.964	1.91401	5.10935	4.97626
3.22667	1.41076	1.96904	1.92006	5.12184	4.98821
3.23	1.41332	1.97383	1.9243	5.12978	4.99857
3.23333	1.41794	1.97645	1.93115	5.13733	5.00824
3.23667	1.4239	1.98269	1.9352	5.14964	5.01881
3.24	1.42701	1.9887	1.93805	5.16232	5.02722
3.24333	1.43147	1.99427	1.94414	5.16847	5.03894
3.24667	1.43354	1.99952	1.94846	5.17871	5.0489
3.25	1.43957	2.00637	1.95167	5.1901	5.05949
3.25333	1.44319	2.01058	1.9592	5.19851	5.07067
3.25667	1.452	2.0141	1.96632	5.20696	5.08193
3.26	1.45766	2.01764	1.9707	5.21864	5.09212
3.26333	1.46353	2.02348	1.97532	5.2292	5.10056
3.26667	1.46822	2.0271	1.98048	5.23774	5.1112
3.27	1.47091	2.03361	1.98379	5.24758	5.12433
3.27333	1.47046	2.03849	1.98753	5.25848	5.13391
3.27667	1.47159	2.04557	1.9919	5.2699	5.14221
3.28	1.47475	2.05038	1.99958	5.27976	5.1537
3.28333	1.47714	2.05722	2.00404	5.28659	5.16259
3.28667	1.47777	2.06153	2.0096	5.29704	5.17143
3.29	1.47991	2.06621	2.01362	5.30479	5.17923
3.29333	1.48409	2.06973	2.01796	5.30996	5.18753
3.29667	1.48547	2.07491	2.02371	5.31907	5.19807
3.3	1.48877	2.07897	2.0274	5.33059	5.20946
3.30333	1.49878	2.08296	2.03114	5.33766	5.22022
3.30667	1.50597	2.08866	2.03633	5.34736	5.23349
3.31	1.51123	2.09442	2.04392	5.36027	5.24675
3.31333	1.51809	2.09836	2.04745	5.36942	5.25457
3.31667	1.52263	2.10482	2.05498	5.3777	5.26445
3.32	1.52417	2.11061	2.05957	5.38849	5.27206
3.32333	1.52426	2.117	2.06613	5.39811	5.27751
3.32667	1.52872	2.12118	2.06782	5.40566	5.28832
3.33	1.53108	2.12622	2.07328	5.41571	5.30149
3.33333	1.53261	2.12911	2.07839	5.4254	5.30939
3.33667	1.53708	2.13563	2.08464	5.43305	5.31902
3.34	1.54158	2.13953	2.08972	5.44184	5.32716
3.34333	1.54307	2.14613	2.0973	5.4491	5.33664
3.34667	1.54877	2.15038	2.10201	5.45708	5.34738
3.35	1.5512	2.1581	2.10764	5.46637	5.35898
3.35333	1.5529	2.16179	2.11297	5.47842	5.36781
3.35667	1.55726	2.16817	2.1168	5.4872	5.38206
3.36	1.5603	2.17281	2.12063	5.49866	5.39354
3.36333	1.56268	2.17885	2.12705	5.50811	5.40269
3.36667	1.56871	2.18321	2.13273	5.51599	5.41416
3.37	1.57376	2.18761	2.13934	5.52405	5.42602
3.37333	1.57775	2.19116	2.14547	5.53334	5.43712
3.37667	1.58154	2.19722	2.15006	5.54211	5.44552
3.38	1.58579	2.20174	2.1541	5.54969	5.45366
3.38333	1.59067	2.20695	2.15977	5.55774	5.46068
3.38667	1.59369	2.21251	2.16351	5.56636	5.46868
3.39	1.59607	2.21821	2.16805	5.57529	5.47483
3.39333	1.59987	2.22285	2.17491	5.58506	5.48348
3.39667	1.60545	2.22854	2.18084	5.59393	5.49271
3.4	1.61071	2.23174	2.18401	5.60373	5.50361
3.40333	1.61441	2.23686	2.18984	5.61304	5.51456
3.40667	1.6187	2.24312	2.19557	5.62188	5.52578
3.41	1.62396	2.24674	2.19941	5.63005	5.53607
3.41333	1.62533	2.25053	2.20496	5.64165	5.54472
3.41667	1.62612	2.25785	2.2113	5.65152	5.55515
3.42	1.63372	2.26329	2.21822	5.6603	5.56283
3.42333	1.64153	2.26744	2.22418	5.67153	5.57019
3.42667	1.64605	2.27205	2.23023	5.68182	5.57812
3.43	1.65011	2.27819	2.23587	5.68675	5.58664
3.43333	1.65548	2.28257	2.24064	5.69562	5.59313
3.43667	1.65527	2.28839	2.24571	5.70458	5.60374
3.44	1.6562	2.29346	2.25007	5.71138	5.61543
3.44333	1.65929	2.30067	2.25634	5.7195	5.62446
3.44667	1.66378	2.3061	2.26125	5.72851	5.63369
3.45	1.66879	2.31139	2.26636	5.73702	5.64215
3.45333	1.67277	2.31744	2.27149	5.74686	5.65069
3.45667	1.67414	2.32236	2.27707	5.75575	5.66086
3.46	1.67708	2.32728	2.28466	5.76231	5.6693
3.46333	1.68061	2.33122	2.28857	5.77158	5.67981
3.46667	1.68561	2.33758	2.29321	5.77916	5.6905
3.47	1.69084	2.34081	2.2969	5.78802	5.6977
3.47333	1.69647	2.34799	2.30147	5.79801	5.70415
3.47667	1.70156	2.354	2.30483	5.80803	5.71482
3.48	1.70568	2.35936	2.30973	5.82037	5.72383
3.48333	1.70985	2.36433	2.3169	5.82881	5.73188
3.48667	1.70957	2.37085	2.32298	5.83485	5.74058
3.49	1.71642	2.37541	2.33229	5.84261	5.74937
3.49333	1.72129	2.38009	2.33775	5.85221	5.75647
3.49667	1.72331	2.38814	2.34424	5.85848	5.76575
3.5	1.72565	2.39533	2.35052	5.86907	5.77684
3.50333	1.73489	2.40101	2.35652	5.87773	5.7893
3.50667	1.73844	2.40536	2.35999	5.88618	5.79921
3.51	1.73875	2.40985	2.36462	5.89405	5.81161
3.51333	1.74287	2.41437	2.37083	5.90379	5.81922
3.51667	1.74386	2.41785	2.37646	5.91102	5.82775
3.52	1.74486	2.42282	2.37954	5.91919	5.83337
3.52333	1.74971	2.4282	2.38713	5.92792	5.83839
3.52667	1.75515	2.43392	2.39561	5.93628	5.84417
3.53	1.75948	2.43895	2.40022	5.94295	5.85434
3.53333	1.76573	2.44362	2.40445	5.95121	5.86204
3.53667	1.76908	2.44725	2.41201	5.96288	5.87163
3.54	1.76845	2.45328	2.41365	5.9693	5.88551
3.54333	1.77526	2.45957	2.41745	5.97665	5.89474
3.54667	1.78102	2.46592	2.42318	5.98735	5.90069
3.55	1.7859	2.47237	2.42989	5.99448	5.90963
3.55333	1.79264	2.47967	2.43361	6.00034	5.91779
3.55667	1.79871	2.48319	2.44158	6.01054	5.92363
3.56	1.80208	2.48786	2.44559	6.02095	5.93473
3.56333	1.80614	2.49157	2.45145	6.02778	5.94335
3.56667	1.8081	2.49679	2.45445	6.03453	5.95257
3.57	1.81417	2.50103	2.46059	6.0429	5.96165
3.57333	1.81922	2.50633	2.46558	6.05005	5.97408
3.57667	1.82002	2.51391	2.47045	6.05857	5.98284
3.58	1.81822	2.51998	2.47556	6.06731	5.99288
3.58333	1.82391	2.52499	2.48149	6.07706	6.00134
3.58667	1.82407	2.5305	2.48864	6.08499	6.0116
3.59	1.82879	2.53834	2.49461	6.09291	6.01575
3.59333	1.83647	2.5415	2.50081	6.09957	6.02106
3.59667	1.84436	2.54556	2.50736	6.10686	6.02973
3.6	1.84919	2.55233	2.51341	6.1158	6.03793
3.60333	1.84883	2.55634	2.51657	6.12382	6.04628
3.60667	1.85093	2.56055	2.52246	6.13134	6.05345
3.61	1.8524	2.56737	2.53043	6.14014	6.06272
3.61333	1.86011	2.57413	2.53492	6.14663	6.07151
3.61667	1.86416	2.57802	2.54107	6.15354	6.08024
3.62	1.87133	2.58496	2.54679	6.16253	6.08851
3.62333	1.87875	2.59186	2.55127	6.17048	6.09648
3.62667	1.88281	2.59663	2.55334	6.17689	6.10541
3.63	1.88711	2.60259	2.55809	6.18843	6.11353
3.63333	1.88876	2.60695	2.5607	6.19636	6.12203
3.63667	1.89427	2.61162	2.56629	6.20387	6.12884
3.64	1.89831	2.61433	2.57164	6.21272	6.13864
3.64333	1.90194	2.62007	2.5775	6.22366	6.14664
3.64667	1.90103	2.62455	2.58467	6.22948	6.15351
3.65	1.90268	2.62985	2.59378	6.23662	6.16251
3.65333	1.90652	2.63661	2.59968	6.24391	6.17352
3.65667	1.91048	2.64325	2.6047	6.2516	6.18027
3.66	1.91419	2.64836	2.61198	6.25983	6.18827
3.66333	1.92235	2.6551	2.61636	6.26595	6.19675
3.66667	1.92937	2.66107	2.62101	6.2746	6.20304
3.67	1.93589	2.6653	2.62563	6.28353	6.20811
3.67333	1.9363	2.67184	2.63109	6.29051	6.21837
3.67667	1.93929	2.67599	2.63497	6.29634	6.22319
3.68	1.93961	2.67989	2.64098	6.30506	6.23006
3.68333	1.94113	2.68811	2.64692	6.31029	6.23608
3.68667	1.94346	2.69413	2.65206	6.31642	6.24898
3.69	1.9481	2.6983	2.6585	6.32456	6.25388
3.69333	1.95081	2.70307	2.66275	6.33394	6.26618
3.69667	1.95849	2.70743	2.66828	6.34265	6.27579
3.7	1.96655	2.71047	2.67504	6.3557	6.28533
3.70333	1.97242	2.71625	2.6823	6.36136	6.29057
3.70667	1.97625	2.72299	2.68783	6.37104	6.29703
3.71	1.9816	2.72776	2.69654	6.37804	6.30028
3.71333	1.98453	2.73607	2.70018	6.38629	6.30713
3.71667	1.98567	2.74277	2.70375	6.3917	6.31556
3.72	1.98561	2.74793	2.70992	6.40076	6.3212
3.72333	1.98907	2.75476	2.71366	6.40876	6.33005
3.72667	1.99651	2.76296	2.71804	6.41637	6.34046
3.73	1.99784	2.76698	2.72627	6.4223	6.34581
3.73333	2.00296	2.77265	2.73175	6.42997	6.35135
3.73667	2.01244	2.77894	2.73638	6.43817	6.35661
3.74	2.01949	2.78249	2.74354	6.44316	6.36466
3.74333	2.02083	2.78617	2.74908	6.45114	6.37057
3.74667	2.03012	2.79304	2.75426	6.45935	6.38019
3.75	2.03453	2.79801	2.7597	6.4649	6.38581
3.75333	2.03476	2.80174	2.76478	6.47208	6.39481
3.75667	2.03633	2.80875	2.76924	6.47949	6.40283
3.76	2.03861	2.8163	2.77424	6.4867	6.4113
3.76333	2.04233	2.82073	2.77873	6.49423	6.41956
3.76667	2.04543	2.82688	2.78257	6.50192	6.42837
3.77	2.04912	2.83423	2.79014	6.51033	6.43566
3.77333	2.05379	2.83825	2.79891	6.51777	6.44246
3.77667	2.06005	2.84493	2.8048	6.52446	6.45217
3.78	2.06421	2.85084	2.81011	6.53078	6.4576
3.78333	2.07147	2.85541	2.81878	6.53723	6.46741
3.78667	2.07836	2.8604	2.82173	6.54367	6.477
3.79	2.08351	2.86513	2.82583	6.55027	6.48444
3.79333	2.08573	2.86907	2.83109	6.55861	6.49103
3.79667	2.08917	2.87558	2.83649	6.56643	6.5002
3.8	2.08832	2.88138	2.84156	6.5736	6.50627
3.80333	2.08691	2.88423	2.84851	6.57821	6.51194
3.80667	2.08693	2.88892	2.85176	6.58322	6.51914
3.81	2.0909	2.89437	2.86092	6.5854	6.52436
3.81333	2.09073	2.89937	2.86605	6.59208	6.53185
3.81667	2.09544	2.90387	2.87015	6.59934	6.53686
3.82	2.10493	2.91177	2.87661	6.60902	6.54204
3.82333	2.1126	2.91879	2.88457	6.61628	6.54718
3.82667	2.11712	2.92556	2.88877	6.6261	6.55409
3.83	2.12545	2.93231	2.89462	6.63234	6.55688
3.83333	2.1304	2.93804	2.9014	6.64046	6.56479
3.83667	2.13336	2.94391	2.90753	6.64473	6.57132
3.84	2.1386	2.94837	2.91221	6.65436	6.58038
3.84333	2.14384	2.95389	2.91844	6.66178	6.58677
3.84667	2.14651	2.95959	2.92446	6.66959	6.59613
3.85	2.15199	2.96641	2.92926	6.676	6.59838
3.85333	2.15371	2.96944	2.93675	6.68293	6.60789
3.85667	2.15611	2.97742	2.94231	6.69146	6.61118
3.86	2.15539	2.98251	2.94711	6.69701	6.6178
3.86333	2.15954	2.98711	2.95294	6.706	6.62168
3.86667	2.16426	2.99289	2.95752	6.71484	6.63156
3.87	2.17047	2.99975	2.96012	6.72443	6.63678
3.87333	2.17491	3.0039	2.9683	6.72975	6.64524
3.87667	2.18401	3.00923	2.9709	6.7369	6.64998
3.88	2.18709	3.01364	2.9769	6.74079	6.65565
3.88333	2.18947	3.01956	2.98341	6.74641	6.66257
3.88667	2.19187	3.02618	2.9898	6.75046	6.66932
3.89	2.19549	3.03196	2.99437	6.75713	6.67469
3.89333	2.19669	3.03869	3.00352	6.76648	6.68039
3.89667	2.2026	3.04505	3.0108	6.7728	6.6865
3.9	2.20825	3.04988	3.01701	6.77877	6.69498
3.90333	2.20874	3.05628	3.02481	6.78703	6.69842
3.90667	2.21236	3.06301	3.0301	6.79365	6.70757
3.91	2.21677	3.0695	3.0355	6.79864	6.71518
3.91333	2.21905	3.07488	3.04056	6.8063	6.72375
3.91667	2.21958	3.08003	3.04636	6.81511	6.73004
3.92	2.2253	3.08442	3.0493	6.8206	6.73796
3.92333	2.22829	3.08816	3.05306	6.82578	6.74394
3.92667	2.22842	3.09204	3.05921	6.83319	6.75096
3.93	2.23054	3.09786	3.06574	6.84012	6.75797
3.93333	2.23655	3.10507	3.07114	6.84458	6.76166
3.93667	2.24193	3.11098	3.07775	6.85136	6.77093
3.94	2.24671	3.11659	3.0868	6.85857	6.77557
3.94333	2.25995	3.12318	3.09217	6.86527	6.78059
3.94667	2.2688	3.12816	3.09538	6.87207	6.78596
3.95	2.27238	3.13343	3.10188	6.87891	6.79232
3.95333	2.27174	3.13937	3.10622	6.88501	6.79509
3.95667	2.27462	3.14549	3.11353	6.89212	6.79893
3.96	2.27334	3.15094	3.12124	6.89626	6.80388
3.96333	2.27553	3.15748	3.12644	6.90108	6.81031
3.96667	2.2824	3.1631	3.13345	6.90632	6.81759
3.97	2.28966	3.16718	3.13855	6.91625	6.82629
3.97333	2.29818	3.17372	3.1419	6.92125	6.83409
3.97667	2.30119	3.17803	3.14645	6.92726	6.84157
3.98	2.30442	3.18305	3.15252	6.93361	6.84791
3.98333	2.30787	3.19086	3.15665	6.94186	6.85126
3.98667	2.31425	3.19691	3.16294	6.94463	6.85716
3.99	2.31662	3.20024	3.16923	6.94945	6.86326
3.99333	2.32254	3.20722	3.17261	6.95804	6.86807
3.99667	2.32651	3.21215	3.17945	6.96209	6.87533
4	2.32844	3.21592	3.1842	6.96967	6.88222
4.00333	2.33278	3.22291	3.19258	6.97559	6.88833
4.00667	2.33646	3.22899	3.19725	6.98725	6.89619
4.01	2.34372	3.23387	3.20404	6.99061	6.902
4.01333	2.34423	3.24193	3.20986	6.99848	6.90515
4.01667	2.34884	3.24839	3.21396	7.00319	6.91202
4.02	2.35342	3.2532	3.21901	7.01109	6.91718
4.02333	2.36031	3.26079	3.22448	7.01483	6.91858
4.02667	2.3635	3.26595	3.23005	7.02122	6.92612
4.03	2.37111	3.2708	3.237	7.0253	6.93406
4.03333	2.37588	3.27342	3.24555	7.03151	6.93875
4.03667	2.37855	3.27929	3.25233	7.035	6.94388
4.04	2.37782	3.28293	3.26002	7.04102	6.95339
4.04333	2.38319	3.28935	3.2694	7.05024	6.95844
4.04667	2.38362	3.29344	3.27434	7.05829	6.96246
4.05	2.38755	3.30119	3.27882	7.06264	6.96643
4.05333	2.39366	3.30509	3.2828	7.07085	6.96866
4.05667	2.40188	3.31204	3.28766	7.07376	6.97592
4.06	2.40391	3.31554	3.29217	7.07841	6.98255
4.06333	2.40939	3.32201	3.29651	7.08429	6.98993
4.06667	2.41148	3.32883	3.30201	7.09128	6.99742
4.07	2.41129	3.33571	3.30968	7.09717	7.00518
4.07333	2.41449	3.34106	3.31498	7.10236	7.00655
4.07667	2.41985	3.34812	3.32078	7.10772	7.01192
4.08	2.4227	3.35559	3.32603	7.11262	7.01552
4.08333	2.42974	3.35895	3.33164	7.11856	7.01973
4.08667	2.43934	3.36518	3.33731	7.12346	7.02204
4.09	2.44409	3.37007	3.3429	7.13105	7.02891
4.09333	2.44656	3.37676	3.34948	7.1371	7.03118
4.09667	2.45441	3.38183	3.35472	7.14098	7.03711
4.1	2.45393	3.38782	3.35938	7.1464	7.04084
4.10333	2.45398	3.39273	3.36473	7.15281	7.04924
4.10667	2.45805	3.39963	3.37041	7.15825	7.05307
4.11	2.46342	3.40355	3.37461	7.16583	7.05881
4.11333	2.46783	3.40821	3.3821	7.17503	7.06168
4.11667	2.47258	3.41484	3.38915	7.17896	7.06861
4.12	2.47263	3.41803	3.39446	7.18502	7.07305
4.12333	2.47337	3.42307	3.40141	7.19035	7.07675
4.12667	2.47547	3.42836	3.40551	7.19378	7.08422
4.13	2.47913	3.43429	3.41073	7.19934	7.08728
4.13333	2.485	3.43985	3.41721	7.20623	7.08992
4.13667	2.49295	3.44584	3.42094	7.20994	7.09388
4.14	2.49736	3.45132	3.42535	7.21455	7.09933
4.14333	2.49801	3.45759	3.4314	7.21916	7.10215
4.14667	2.49926	3.46288	3.4363	7.22555	7.11036
4.15	2.50547	3.46841	3.44401	7.23067	7.11384
4.15333	2.51085	3.47595	3.45152	7.2369	7.12045
4.15667	2.51624	3.48372	3.45646	7.24338	7.12599
4.16	2.52537	3.49102	3.4635	7.25019	7.13194
4.16333	2.53123	3.49691	3.47132	7.253	7.13616
4.16667	2.53262	3.5015	3.47577	7.25991	7.14294
4.17	2.53678	3.50885	3.48231	7.26542	7.14638
4.17333	2.53711	3.51239	3.48679	7.27043	7.15093
4.17667	2.5362	3.51635	3.49365	7.27628	7.15398
4.18	2.53886	3.52098	3.49799	7.28058	7.15854
4.18333	2.54122	3.52651	3.50237	7.2836	7.16337
4.18667	2.54511	3.53217	3.50719	7.29022	7.1688
4.19	2.55257	3.53797	3.51546	7.2964	7.17082
4.19333	2.56185	3.54446	3.52177	7.30132	7.17265
4.19667	2.56567	3.55109	3.52796	7.30965	7.17463
4.2	2.56953	3.55627	3.53349	7.31621	7.18031
4.20333	2.57478	3.55975	3.53886	7.32011	7.18328
4.20667	2.57519	3.56666	3.54526	7.32506	7.19001
4.21	2.57534	3.57026	3.55008	7.33009	7.19684
4.21333	2.57864	3.57456	3.55538	7.33575	7.20632
4.21667	2.58341	3.58173	3.56141	7.34313	7.20775
4.22	2.58631	3.58728	3.56604	7.34985	7.21353
4.22333	2.59019	3.59263	3.57301	7.35677	7.21767
4.22667	2.59388	3.59903	3.57793	7.35947	7.223
4.23	2.59983	3.60665	3.58442	7.36403	7.22372
4.23333	2.60194	3.6108	3.58993	7.36694	7.22844
4.23667	2.60394	3.6175	3.59779	7.3707	7.2301
4.24	2.61015	3.62164	3.60111	7.37602	7.23467
4.24333	2.61633	3.62754	3.6074	7.38222	7.23562
4.24667	2.61822	3.6335	3.61341	7.38679	7.24193
4.25	2.62535	3.64077	3.62026	7.3911	7.24934
4.25333	2.63119	3.64566	3.62473	7.39683	7.25633
4.25667	2.63698	3.65233	3.63154	7.40223	7.26136
4.26	2.64098	3.65887	3.63846	7.40729	7.26549
4.26333	2.64485	3.66146	3.64344	7.41105	7.26936
4.26667	2.64801	3.66638	3.64974	7.41892	7.2727
4.27	2.65219	3.67153	3.65554	7.42196	7.27728
4.27333	2.65244	3.67689	3.6595	7.42484	7.27873
4.27667	2.6571	3.68117	3.66404	7.43206	7.28499
4.28	2.66079	3.68823	3.67116	7.44001	7.2893
4.28333	2.66487	3.69361	3.67706	7.44404	7.29299
4.28667	2.66824	3.69867	3.68231	7.45094	7.29647
4.29	2.67471	3.70459	3.68756	7.45808	7.30268
4.29333	2.6784	3.71057	3.69324	7.46087	7.30592
4.29667	2.68297	3.71563	3.69982	7.46421	7.31039
4.3	2.68827	3.72037	3.70235	7.46894	7.3121
4.30333	2.69441	3.72642	3.70867	7.47276	7.3173
4.30667	2.6967	3.73415	3.71617	7.47486	7.3203
4.31	2.70036	3.74005	3.72146	7.47989	7.32854
4.31333	2.70616	3.74582	3.72598	7.48395	7.3324
4.31667	2.70816	3.75423	3.73256	7.4863	7.33859
4.32	2.71061	3.75887	3.73955	7.49146	7.34172
4.32333	2.71622	3.76141	3.74531	7.49881	7.3447
4.32667	2.71964	3.76838	3.75131	7.503	7.34549
4.33	2.7241	3.77442	3.75614	7.50639	7.35051
4.33333	2.72621	3.77926	3.76506	7.50989	7.35265
4.33667	2.72831	3.78685	3.77013	7.51424	7.35471
4.34	2.73581	3.79235	3.77624	7.51733	7.35952
4.34333	2.74191	3.7971	3.78154	7.52154	7.36248
4.34667	2.74592	3.8018	3.7882	7.52686	7.36519
4.35	2.75421	3.80604	3.79125	7.53306	7.36726
4.35333	2.7616	3.81041	3.7961	7.53757	7.37335
4.35667	2.76504	3.81561	3.80006	7.54295	7.3772
4.36	2.76925	3.8213	3.80655	7.54926	7.38318
4.36333	2.77302	3.8266	3.81118	7.55595	7.38581
4.36667	2.77598	3.83272	3.81842	7.56085	7.39166
4.37	2.77913	3.83792	3.82307	7.5646	7.39568
4.37333	2.78027	3.84571	3.83156	7.56929	7.40203
4.37667	2.78374	3.84932	3.83642	7.57387	7.40575
4.38	2.78881	3.8561	3.84413	7.57787	7.41211
4.38333	2.79046	3.86356	3.84816	7.58196	7.41634
4.38667	2.79242	3.86973	3.85424	7.58727	7.41779
4.39	2.7966	3.87422	3.85885	7.59067	7.41926
4.39333	2.79801	3.88217	3.86557	7.59349	7.42259
4.39667	2.80318	3.88741	3.86908	7.59705	7.42396
4.4	2.80975	3.89083	3.87638	7.602	7.42528
4.40333	2.81623	3.89701	3.88451	7.60659	7.42887
4.40667	2.81881	3.90311	3.89229	7.61002	7.43274
4.41	2.82328	3.90973	3.89775	7.615	7.43574
4.41333	2.82466	3.91394	3.90348	7.62056	7.44069
4.41667	2.82732	3.92037	3.90813	7.62459	7.44705
4.42	2.83016	3.92504	3.91256	7.62952	7.45143
4.42333	2.83704	3.93021	3.91741	7.63642	7.45466
4.42667	2.84187	3.9338	3.92245	7.64231	7.45992
4.43	2.84679	3.94065	3.93143	7.64468	7.46187
4.43333	2.85198	3.94408	3.93619	7.65005	7.46572
4.43667	2.85747	3.94827	3.94112	7.65312	7.47081
4.44	2.8601	3.95259	3.94691	7.65701	7.47605
4.44333	2.86774	3.95853	3.95169	7.65962	7.47556
4.44667	2.87234	3.96537	3.9558	7.66451	7.48014
4.45	2.87546	3.97217	3.96311	7.66848	7.48418
4.45333	2.87812	3.97742	3.96924	7.67458	7.48535
4.45667	2.8812	3.98428	3.97329	7.6763	7.48806
4.46	2.88098	3.99049	3.98013	7.68121	7.49324
4.46333	2.8839	3.99545	3.98351	7.68518	7.49466
4.46667	2.88819	4.00242	3.98843	7.68892	7.49492
4.47	2.8944	4.01026	3.99543	7.69311	7.49782
4.47333	2.89924	4.01614	4.00068	7.69537	7.50058
4.47667	2.90612	4.02259	4.00547	7.69897	7.5038
4.48	2.91149	4.03027	4.01434	7.7043	7.50727
4.48333	2.91637	4.03414	4.01831	7.70929	7.50938
4.48667	2.91498	4.04044	4.02177	7.71301	7.51321
4.49	2.91775	4.04262	4.02748	7.71958	7.51735
4.49333	2.91812	4.0478	4.0341	7.72354	7.51799
4.49667	2.92063	4.04884	4.03769	7.72813	7.52029
4.5	2.92316	4.05615	4.04654	7.73301	7.52326
4.50333	2.93066	4.05866	4.05215	7.73727	7.52634
4.50667	2.93389	4.06768	4.05557	7.74297	7.52896
4.51	2.94148	4.07138	4.06091	7.74871	7.53242
4.51333	2.94555	4.0786	4.06767	7.75395	7.5357
4.51667	2.95067	4.0832	4.07172	7.75619	7.54
4.52	2.95525	4.0908	4.07724	7.75986	7.54177
4.52333	2.95901	4.0971	4.08749	7.76208	7.54478
4.52667	2.95923	4.10221	4.09346	7.76513	7.55111
4.53	2.9623	4.10853	4.09782	7.76645	7.55114
4.53333	2.96247	4.11686	4.10546	7.77172	7.55582
4.53667	2.96413	4.12182	4.11074	7.77471	7.56055
4.54	2.96699	4.12445	4.11614	7.77963	7.56319
4.54333	2.96897	4.13134	4.12302	7.78363	7.56345
4.54667	2.9716	4.13647	4.12764	7.78831	7.57062
4.55	2.97791	4.14038	4.13214	7.79157	7.57201
4.55333	2.98162	4.14448	4.13774	7.79567	7.57557
4.55667	2.98776	4.1508	4.14178	7.79838	7.5772
4.56	2.99894	4.1573	4.14443	7.8011	7.5827
4.56333	3.00476	4.16346	4.14911	7.80465	7.5848
4.56667	3.00851	4.16967	4.15495	7.80805	7.59156
4.57	3.01121	4.17588	4.15948	7.81182	7.59429
4.57333	3.01188	4.18102	4.16719	7.81592	7.60009
4.57667	3.01221	4.18478	4.17409	7.82218	7.60231
4.58	3.01413	4.18993	4.18187	7.82736	7.60613
4.58333	3.01677	4.19385	4.18913	7.83147	7.60387
4.58667	3.02296	4.19874	4.19541	7.83719	7.60489
4.59	3.02991	4.20539	4.19908	7.84232	7.60581
4.59333	3.03294	4.21096	4.2034	7.84389	7.61052
4.59667	3.03793	4.21449	4.20974	7.84862	7.61408
4.6	3.04398	4.21849	4.2128	7.85017	7.61844
4.60333	3.05104	4.22426	4.21913	7.853	7.62508
4.60667	3.0549	4.22961	4.22346	7.85631	7.62745
4.61	3.06165	4.23639	4.22882	7.85828	7.62935
4.61333	3.06684	4.24429	4.23198	7.86211	7.63134
4.61667	3.07047	4.2514	4.23698	7.86808	7.63485
4.62	3.07153	4.25787	4.24328	7.87048	7.63626
4.62333	3.07414	4.26046	4.24804	7.87486	7.64111
4.62667	3.07637	4.26509	4.25679	7.87988	7.64375
4.63	3.08032	4.26942	4.26475	7.88343	7.6461
4.63333	3.08246	4.27381	4.26856	7.88566	7.64828
4.63667	3.084	4.27837	4.2734	7.88891	7.65163
4.64	3.0842	4.28672	4.28098	7.8935	7.65265
4.64333	3.08853	4.2918	4.28379	7.8971	7.65503
4.64667	3.08655	4.29523	4.28849	7.90056	7.65968
4.65	3.0893	4.30118	4.29558	7.90648	7.66201
4.65333	3.09693	4.3067	4.29963	7.9112	7.6624
4.65667	3.10723	4.31017	4.30531	7.91244	7.6659
4.66	3.10967	4.316	4.31316	7.91435	7.66735
4.66333	3.1178	4.32231	4.31872	7.91613	7.66826
4.66667	3.12362	4.32801	4.32547	7.91803	7.6727
4.67	3.12463	4.33219	4.33379	7.92186	7.67743
4.67333	3.12456	4.33833	4.33728	7.92521	7.6783
4.67667	3.12876	4.34381	4.34059	7.93244	7.68481
4.68	3.13025	4.34891	4.34593	7.93715	7.68684
4.68333	3.13451	4.35377	4.3507	7.94155	7.68876
4.68667	3.13815	4.35856	4.35385	7.94507	7.68911
4.69	3.14583	4.36404	4.35969	7.94832	7.69335
4.69333	3.15095	4.36837	4.36644	7.952	7.69261
4.69667	3.15831	4.37327	4.37082	7.95334	7.6965
4.7	3.16307	4.38004	4.37761	7.95989	7.69953
4.70333	3.16845	4.38725	4.38555	7.96406	7.70308
4.70667	3.16748	4.39301	4.39276	7.96881	7.70426
4.71	3.16881	4.39917	4.3982	7.9714	7.70537
4.71333	3.17213	4.40746	4.40439	7.97835	7.70587
4.71667	3.17279	4.41002	4.41016	7.98044	7.70825
4.72	3.17129	4.41496	4.41184	7.98061	7.70933
4.72333	3.17432	4.42077	4.4179	7.98688	7.71417
4.72667	3.1807	4.42567	4.42367	7.98901	7.71848
4.73	3.18399	4.4288	4.42943	7.99137	7.72172
4.73333	3.18797	4.43591	4.43528	7.9942	7.72234
4.73667	3.19962	4.44292	4.44378	8.00079	7.72734
4.74	3.20553	4.44773	4.44709	8.00268	7.72899
4.74333	3.20663	4.45396	4.45275	8.00592	7.73076
4.74667	3.21198	4.46196	4.45947	8.00721	7.73556
4.75	3.2187	4.46764	4.46347	8.01239	7.74155
4.75333	3.21836	4.4693	4.46716	8.01361	7.74221
4.75667	3.21971	4.47369	4.47372	8.01637	7.74433
4.76	3.22519	4.47804	4.47763	8.02021	7.74673
4.76333	3.22861	4.48082	4.48284	8.02595	7.74965
4.76667	3.22673	4.48413	4.48934	8.02681	7.74943
4.77	3.23217	4.4913	4.4941	8.02915	7.75344
4.77333	3.23732	4.49682	4.50055	8.03226	7.7526
4.77667	3.24101	4.50274	4.51132	8.03555	7.75746
4.78	3.24196	4.50866	4.51694	8.03846	7.75727
4.78333	3.24961	4.5147	4.52096	8.04141	7.75744
4.78667	3.25253	4.5186	4.52847	8.04634	7.75704
4.79	3.25823	4.52416	4.53359	8.04997	7.76444
4.79333	3.26023	4.52969	4.53437	8.0535	7.766
4.79667	3.26542	4.53573	4.54082	8.05715	7.76883
4.8	3.26849	4.54191	4.54548	8.06027	7.77347
4.80333	3.27365	4.54849	4.55182	8.06179	7.77778
4.80667	3.2783	4.55283	4.55777	8.06396	7.77782
4.81	3.28249	4.55871	4.56381	8.06688	7.78105
4.81333	3.2857	4.56238	4.56829	8.07012	7.78307
4.81667	3.29199	4.56709	4.57058	8.0727	7.78589
4.82	3.29569	4.57118	4.57575	8.07734	7.78641
4.82333	3.30052	4.5775	4.57974	8.08139	7.78771
4.82667	3.30396	4.58176	4.58466	8.08422	7.78863
4.83	3.3107	4.58798	4.59083	8.08682	7.79145
4.83333	3.31233	4.59311	4.60082	8.09096	7.79549
4.83667	3.31424	4.5989	4.60663	8.0949	7.80004
4.84	3.31534	4.6031	4.61555	8.0974	7.8036
4.84333	3.32392	4.60768	4.61972	8.10161	7.80497
4.84667	3.32438	4.61187	4.6266	8.10298	7.8054
4.85	3.32878	4.61837	4.63092	8.10539	7.80594
4.85333	3.33267	4.62322	4.63659	8.10985	7.80693
4.85667	3.33773	4.63098	4.63811	8.11293	7.81224
4.86	3.33575	4.63771	4.64378	8.11668	7.81353
4.86333	3.34043	4.64327	4.64676	8.11864	7.81665
4.86667	3.34161	4.64737	4.65142	8.12252	7.81797
4.87	3.34549	4.65302	4.65628	8.12574	7.82074
4.87333	3.34696	4.65711	4.66407	8.12767	7.82114
4.87667	3.35415	4.6624	4.66888	8.12918	7.82531
4.88	3.35767	4.66841	4.6771	8.13036	7.82679
4.88333	3.36427	4.67248	4.68149	8.13167	7.82755
4.88667	3.36894	4.67843	4.68608	8.13271	7.8279
4.89	3.37355	4.68495	4.69052	8.13461	7.82966
4.89333	3.37711	4.68969	4.69731	8.13638	7.8327
4.89667	3.3811	4.69391	4.70028	8.14124	7.83598
4.9	3.38354	4.69865	4.70477	8.14712	7.83793
4.90333	3.38857	4.70421	4.7121	8.15082	7.84033
4.90667	3.39213	4.70847	4.71662	8.15309	7.84136
4.91	3.39656	4.71347	4.72143	8.15743	7.84257
4.91333	3.40028	4.71979	4.72503	8.16008	7.84491
4.91667	3.4073	4.72579	4.73137	8.16026	7.85064
4.92	3.40759	4.72821	4.73428	8.16338	7.85277
4.92333	3.41278	4.7331	4.74012	8.1679	7.85565
4.92667	3.41705	4.73741	4.74633	8.17033	7.85794
4.93	3.41954	4.7437	4.75283	8.17407	7.86053
4.93333	3.42095	4.74665	4.75977	8.17846	7.86229
4.93667	3.42577	4.75404	4.76302	8.18138	7.86599
4.94	3.42758	4.75912	4.76772	8.18385	7.86608
4.94333	3.43265	4.76628	4.77205	8.1877	7.86879
4.94667	3.43551	4.76927	4.77421	8.19127	7.87115
4.95	3.43977	4.77747	4.77714	8.19587	7.87156
4.95333	3.44305	4.78215	4.78222	8.19754	7.87377
4.95667	3.4457	4.78679	4.78836	8.2008	7.87612
4.96	3.44196	4.78949	4.79257	8.20382	7.87731
4.96333	3.44933	4.79445	4.80014	8.20685	7.87791
4.96667	3.44969	4.79847	4.80879	8.20876	7.88083
4.97	3.45669	4.8027	4.81448	8.21421	7.88206
4.97333	3.46298	4.80874	4.81883	8.21621	7.88677
4.97667	3.47074	4.81546	4.8261	8.21741	7.88746
4.98	3.47099	4.82069	4.8323	8.22078	7.89027
4.98333	3.47781	4.82685	4.83499	8.22174	7.89078
4.98667	3.47765	4.83224	4.8426	8.22173	7.89234
4.99	3.47539	4.83835	4.84826	8.22655	7.89517
4.99333	3.47775	4.84214	4.85037	8.23043	7.89835
4.99667	3.48489	4.84798	4.85663	8.23161	7.90001
5	3.48523	4.85157	4.86147	8.2333	7.9031
5.00333	3.49052	4.85745	4.86432	8.23558	7.90547
5.00667	3.49717	4.86129	4.86879	8.23708	7.9055
5.01	3.49927	4.86505	4.87703	8.23896	7.90839
5.01333	3.49922	4.86897	4.87987	8.24136	7.91133
5.01667	3.50823	4.87096	4.88969	8.2464	7.91191
5.02	3.5122	4.87664	4.89661	8.24992	7.9154
5.02333	3.51928	4.88306	4.90196	8.25361	7.91706
5.02667	3.52784	4.88897	4.90829	8.25612	7.91808
5.03	3.53516	4.89289	4.91367	8.25978	7.91946
5.03333	3.53555	4.90073	4.91704	8.26027	7.92209
5.03667	3.53996	4.9038	4.92161	8.26279	7.92387
5.04	3.54312	4.90726	4.92672	8.26445	7.92609
5.04333	3.54469	4.91309	4.92969	8.26908	7.92815
5.04667	3.54565	4.91981	4.93518	8.272	7.93056
5.05	3.54879	4.92449	4.93966	8.27561	7.93413
5.05333	3.5486	4.92969	4.9443	8.27873	7.93579
5.05667	3.55312	4.93596	4.94884	8.28158	7.93673
5.06	3.5559	4.9391	4.95279	8.28456	7.93655
5.06333	3.55859	4.9455	4.95677	8.28662	7.93764
5.06667	3.56079	4.9504	4.96298	8.28835	7.93814
5.07	3.56704	4.95346	4.96804	8.29257	7.93914
5.07333	3.56706	4.95664	4.97243	8.29254	7.942
5.07667	3.56968	4.9638	4.97825	8.29612	7.94423
5.08	3.57607	4.96763	4.98318	8.29867	7.94713
5.08333	3.58254	4.97219	4.98824	8.30375	7.94823
5.08667	3.58873	4.97882	4.99313	8.30519	7.94883
5.09	3.59562	4.98428	4.9985	8.3102	7.94864
5.09333	3.60273	4.98911	5.00411	8.3112	7.95111
5.09667	3.60607	4.99317	5.01087	8.31327	7.94889
5.1	3.60909	4.99851	5.01686	8.31603	7.952
5.10333	3.6097	5.00328	5.02096	8.31928	7.95671
5.10667	3.60962	5.00928	5.02548	8.32102	7.95784
5.11	3.61148	5.01347	5.02886	8.32128	7.95792
5.11333	3.61478	5.0194	5.03284	8.32231	7.96027
5.11667	3.61659	5.02549	5.03531	8.32519	7.9608
5.12	3.61774	5.02992	5.03976	8.32612	7.96254
5.12333	3.62201	5.03311	5.04804	8.33036	7.96532
5.12667	3.6225	5.03902	5.05476	8.3352	7.96982
5.13	3.62103	5.04202	5.05931	8.339	7.97268
5.13333	3.62448	5.0455	5.06681	8.3396	7.97408
5.13667	3.63116	5.05098	5.07262	8.342	7.97533
5.14	3.63283	5.05622	5.07648	8.34463	7.98068
5.14333	3.63716	5.05931	5.08198	8.34796	7.98134
5.14667	3.64708	5.06536	5.08883	8.34999	7.98335
5.15	3.65458	5.07037	5.09413	8.35128	7.98263
5.15333	3.65642	5.07471	5.09965	8.35324	7.98539
5.15667	3.66231	5.08021	5.10417	8.35467	7.98552
5.16	3.6687	5.08738	5.10964	8.35559	7.9901
5.16333	3.66884	5.0907	5.11406	8.3576	7.99345
5.16667	3.67013	5.09581	5.11809	8.36325	7.99941
5.17	3.67473	5.10143	5.1242	8.36659	7.99841
5.17333	3.67741	5.10632	5.13027	8.36778	7.99853
5.17667	3.67864	5.1103	5.13483	8.37037	7.99956
5.18	3.68404	5.11572	5.13876	8.37395	7.99944
5.18333	3.68712	5.11977	5.14192	8.37575	7.99692
5.18667	3.69328	5.12436	5.14585	8.3789	7.99699
5.19	3.69897	5.12671	5.14975	8.38339	7.99925
5.19333	3.70386	5.13114	5.15577	8.38564	7.99762
5.19667	3.70733	5.13587	5.15996	8.38585	7.99911
5.2	3.71015	5.14102	5.16788	8.38725	8.00466
5.20333	3.71163	5.14581	5.17244	8.39048	8.00899
5.20667	3.7141	5.1521	5.17568	8.39212	8.00885
5.21	3.71606	5.15577	5.17637	8.39326	8.01309
5.21333	3.71824	5.15971	5.18401	8.39682	8.01402
5.21667	3.72347	5.16501	5.18701	8.39816	8.01427
5.22	3.72839	5.16959	5.1911	8.39802	8.0172
5.22333	3.73337	5.17267	5.19694	8.39991	8.02289
5.22667	3.73763	5.17841	5.20346	8.40432	8.02437
5.23	3.74179	5.18495	5.20765	8.40824	8.02567
5.23333	3.74463	5.19066	5.21251	8.41125	8.02606
5.23667	3.74924	5.19596	5.21911	8.41383	8.02583
5.24	3.75164	5.20218	5.22243	8.41551	8.02696
5.24333	3.75689	5.20738	5.22777	8.41795	8.02576
5.24667	3.75931	5.21049	5.23316	8.41773	8.02922
5.25	3.76241	5.21526	5.23721	8.41952	8.03238
5.25333	3.76261	5.21794	5.24207	8.42249	8.03315
5.25667	3.76593	5.22076	5.24724	8.42638	8.03149
5.26	3.76611	5.22739	5.25259	8.42873	8.03681
5.26333	3.77277	5.23183	5.25497	8.4339	8.03636
5.26667	3.77556	5.23526	5.26068	8.4381	8.03944
5.27	3.77775	5.2413	5.26506	8.43984	8.04224
5.27333	3.77768	5.24804	5.26996	8.44233	8.04776
5.27667	3.78069	5.25161	5.27441	8.44376	8.04888
5.28	3.77868	5.25496	5.27886	8.44433	8.0498
5.28333	3.7817	5.25969	5.2842	8.44604	8.04909
5.28667	3.78624	5.26515	5.29084	8.44924	8.05145
5.29	3.79724	5.2677	5.29538	8.44962	8.05168
5.29333	3.80046	5.26966	5.29876	8.45182	8.05356
5.29667	3.80501	5.27521	5.30563	8.4535	8.05609
5.3	3.80979	5.27951	5.30868	8.45646	8.05791
5.30333	3.81209	5.28392	5.31195	8.4596	8.05707
5.30667	3.80991	5.29008	5.31643	8.46169	8.05829
5.31	3.81468	5.29581	5.32093	8.46386	8.05844
5.31333	3.81609	5.30148	5.32564	8.46644	8.06101
5.31667	3.81803	5.30516	5.3319	8.46713	8.06201
5.32	3.81885	5.30855	5.33619	8.46624	8.06705
5.32333	3.82422	5.31241	5.34158	8.46911	8.06782
5.32667	3.82859	5.31949	5.34877	8.4719	8.07002
5.33	3.83536	5.32277	5.3529	8.47575	8.06983
5.33333	3.83843	5.32765	5.3552	8.47786	8.07315
5.33667	3.84495	5.33417	5.36184	8.48261	8.07009
5.34	3.84653	5.33919	5.36535	8.48526	8.07267
5.34333	3.84869	5.34268	5.36844	8.48684	8.07582
5.34667	3.85198	5.34878	5.37244	8.48698	8.07856
5.35	3.85494	5.35275	5.37758	8.49127	8.07917
5.35333	3.8602	5.35735	5.37951	8.4919	8.07887
5.35667	3.86545	5.36193	5.38311	8.49635	8.07958
5.36	3.87085	5.36483	5.38844	8.49779	8.07848
5.36333	3.87481	5.37031	5.39322	8.50168	8.08234
5.36667	3.88122	5.37611	5.39881	8.50063	8.08442
5.37	3.88251	5.38088	5.4043	8.50287	8.08974
5.37333	3.88415	5.38443	5.40931	8.5036	8.09276
5.37667	3.88915	5.39128	5.41185	8.50689	8.09483
5.38	3.89056	5.39537	5.41876	8.50772	8.09442
5.38333	3.89421	5.3986	5.42272	8.51184	8.09681
5.38667	3.8957	5.40125	5.42658	8.51306	8.09805
5.39	3.90132	5.40646	5.43464	8.51672	8.09745
5.39333	3.90295	5.40915	5.44076	8.51616	8.09596
5.39667	3.91127	5.41273	5.44468	8.51694	8.09692
5.4	3.91346	5.4185	5.45007	8.51947	8.1013
5.40333	3.92	5.4224	5.45635	8.52313	8.10206
5.40667	3.9239	5.42697	5.45809	8.52365	8.10499
5.41	3.92549	5.43265	5.46263	8.52953	8.10887
5.41333	3.92534	5.43687	5.46486	8.53527	8.10992
5.41667	3.92824	5.44081	5.46935	8.5361	8.10765
5.42	3.92846	5.44495	5.47456	8.53726	8.11112
5.42333	3.92927	5.44837	5.47802	8.53731	8.11159
5.42667	3.93422	5.44985	5.48395	8.53745	8.11504
5.43	3.93976	5.45463	5.48932	8.53845	8.11492
5.43333	3.94436	5.45952	5.49362	8.54015	8.11748
5.43667	3.95032	5.46507	5.49909	8.54196	8.11706
5.44	3.9547	5.47184	5.50685	8.54506	8.11897
5.44333	3.95833	5.47736	5.51064	8.54762	8.12
5.44667	3.96024	5.48405	5.51665	8.54837	8.12298
5.45	3.96266	5.49022	5.52123	8.55128	8.12201
5.45333	3.96481	5.49589	5.5217	8.55308	8.12307
5.45667	3.9697	5.49783	5.52643	8.55356	8.12529
5.46	3.97253	5.50243	5.53034	8.55609	8.12647
5.46333	3.976	5.50572	5.53074	8.55862	8.12635
5.46667	3.97735	5.50934	5.53603	8.56008	8.13135
5.47	3.98249	5.5132	5.54109	8.56378	8.13222
5.47333	3.98235	5.51816	5.54576	8.56661	8.13258
5.47667	3.98495	5.52286	5.54888	8.56677	8.13265
5.48	3.98923	5.52719	5.55562	8.56878	8.13707
5.48333	3.9906	5.53095	5.56023	8.57198	8.13787
5.48667	3.99274	5.53335	5.567	8.57231	8.14117
5.49	3.9966	5.53666	5.57182	8.57469	8.14241
5.49333	3.99702	5.54005	5.57797	8.57611	8.1446
5.49667	3.99806	5.54371	5.58191	8.57766	8.14271
5.5	3.99984	5.54637	5.58513	8.57657	8.14205
5.50333	4.00094	5.55203	5.58948	8.57992	8.14313
5.50667	4.00589	5.55662	5.59132	8.58319	8.14448
5.51	4.00793	5.56225	5.59637	8.58586	8.14371
5.51333	4.01382	5.56764	5.604	8.58999	8.14734
5.51667	4.01992	5.57394	5.61049	8.59117	8.14879
5.52	4.02254	5.57693	5.61507	8.59247	8.15112
5.52333	4.02431	5.58419	5.61921	8.59264	8.1531
5.52667	4.02775	5.5869	5.62386	8.59499	8.15625
5.53	4.03089	5.59087	5.62717	8.59387	8.1585
5.53333	4.03485	5.59439	5.63013	8.59714	8.15769
5.53667	4.04164	5.5998	5.6333	8.60134	8.15819
5.54	4.04824	5.60154	5.63814	8.60318	8.15903
5.54333	4.05529	5.60951	5.64186	8.60439	8.16132
5.54667	4.0556	5.6127	5.64663	8.60792	8.16164
5.55	4.05977	5.61732	5.65178	8.61115	8.16606
5.55333	4.06122	5.62009	5.65829	8.6113	8.16627
5.55667	4.06292	5.62662	5.66365	8.61373	8.16841
5.56	4.06611	5.62836	5.66862	8.6164	8.16736
5.56333	4.06977	5.63375	5.67339	8.61954	8.1701
5.56667	4.07459	5.63569	5.67746	8.6226	8.17129
5.57	4.07487	5.64031	5.68057	8.62363	8.17246
5.57333	4.07432	5.64348	5.68522	8.62439	8.17455
5.57667	4.07697	5.6492	5.68798	8.62845	8.17739
5.58	4.08057	5.65406	5.69028	8.62762	8.17817
5.58333	4.08166	5.65889	5.69443	8.62759	8.1793
5.58667	4.08935	5.66347	5.69743	8.63086	8.18197
5.59	4.09632	5.66693	5.70167	8.63344	8.18342
5.59333	4.09966	5.67015	5.70699	8.63465	8.18612
5.59667	4.10536	5.67082	5.71279	8.636	8.18796
5.6	4.10852	5.67775	5.71734	8.63782	8.18885
5.60333	4.11136	5.68221	5.72201	8.64006	8.18867
5.60667	4.11287	5.68674	5.72477	8.6438	8.18796
5.61	4.11841	5.69006	5.72874	8.64294	8.18641
5.61333	4.11559	5.69671	5.73302	8.64606	8.18957
5.61667	4.11579	5.69937	5.7374	8.64708	8.19237
5.62	4.11488	5.70455	5.74286	8.65015	8.19235
5.62333	4.11729	5.70898	5.75005	8.65266	8.19516
5.62667	4.11624	5.71387	5.75235	8.65492	8.19735
5.63	4.1242	5.71939	5.75828	8.65683	8.19521
5.63333	4.12995	5.72254	5.76331	8.65892	8.19468
5.63667	4.13844	5.72539	5.76819	8.65994	8.20031
5.64	4.14399	5.73066	5.77193	8.65963	8.20012
5.64333	4.15007	5.73288	5.7764	8.66236	8.199
5.64667	4.14869	5.73615	5.77796	8.66429	8.20179
5.65	4.1507	5.74039	5.78095	8.66685	8.20359
5.65333	4.14543	5.74571	5.78532	8.66642	8.20258
5.65667	4.14849	5.74868	5.78604	8.66787	8.204
5.66	4.14796	5.75456	5.79491	8.66845	8.20815
5.66333	4.154	5.75927	5.79925	8.67072	8.20675
5.66667	4.15926	5.76319	5.80261	8.6733	8.20668
5.67	4.16758	5.76639	5.80597	8.67724	8.20802
5.67333	4.16919	5.76967	5.81287	8.67921	8.21102
5.67667	4.17416	5.77256	5.81465	8.68199	8.20993
5.68	4.17782	5.7754	5.81894	8.68381	8.21225
5.68333	4.18169	5.78111	5.82325	8.68653	8.21453
5.68667	4.18631	5.78587	5.82724	8.68776	8.21714
5.69	4.19099	5.78937	5.83152	8.69054	8.21767
5.69333	4.19519	5.79494	5.83535	8.69332	8.22202
5.69667	4.19893	5.80058	5.83835	8.69407	8.22365
5.7	4.20072	5.80612	5.84247	8.69438	8.22471
5.70333	4.20077	5.80837	5.84472	8.69603	8.22557
5.70667	4.20205	5.814	5.84971	8.69899	8.22714
5.71	4.20607	5.81738	5.85393	8.69938	8.22889
5.71333	4.20453	5.81915	5.85879	8.70228	8.23142
5.71667	4.20746	5.82122	5.86263	8.70559	8.23355
5.72	4.21237	5.82596	5.86952	8.70557	8.23375
5.72333	4.21681	5.83012	5.87273	8.7061	8.23377
5.72667	4.21943	5.83434	5.87577	8.70878	8.23462
5.73	4.22467	5.83933	5.87984	8.71082	8.23592
5.73333	4.22772	5.8425	5.88751	8.70939	8.23806
5.73667	4.23048	5.84682	5.89027	8.71268	8.23853
5.74	4.22927	5.84798	5.89611	8.7137	8.2401
5.74333	4.23134	5.85059	5.90169	8.71533	8.23953
5.74667	4.23612	5.85261	5.90623	8.71403	8.24204
5.75	4.23885	5.85557	5.90873	8.71834	8.24267
5.75333	4.24197	5.85783	5.91285	8.71737	8.24597
5.75667	4.25076	5.86275	5.91529	8.72026	8.24703
5.76	4.25217	5.86838	5.91864	8.72141	8.24831
5.76333	4.25464	5.87376	5.92128	8.72688	8.24763
5.76667	4.25722	5.88025	5.92577	8.72723	8.24888
5.77	4.2605	5.88477	5.93105	8.73265	8.24943
5.77333	4.26247	5.88887	5.93529	8.73308	8.24792
5.77667	4.26603	5.89055	5.93768	8.73351	8.25112
5.78	4.27123	5.89328	5.9424	8.73423	8.25148
5.78333	4.27398	5.89567	5.94479	8.73526	8.25243
5.78667	4.27603	5.90067	5.94704	8.73461	8.2525
5.79	4.2794	5.90632	5.95008	8.73582	8.25557
5.79333	4.28223	5.91127	5.95508	8.73849	8.25537
5.79667	4.2817	5.91635	5.95863	8.74024	8.25905
5.8	4.28232	5.92155	5.96448	8.74265	8.25852
5.80333	4.28452	5.92469	5.97079	8.74666	8.25889
5.80667	4.28379	5.92733	5.97519	8.7479	8.2619
5.81	4.28768	5.92897	5.97926	8.75109	8.26092
5.81333	4.29169	5.93168	5.98396	8.75179	8.25951
5.81667	4.29687	5.93408	5.98581	8.753	8.26246
5.82	4.30118	5.93859	5.98976	8.75325	8.2646
5.82333	4.30652	5.94329	5.99351	8.75477	8.26143
5.82667	4.30714	5.94854	5.99797	8.75661	8.26312
5.83	4.30857	5.95159	6.00171	8.75434	8.26283
5.83333	4.31278	5.95616	6.00889	8.75558	8.25956
5.83667	4.31546	5.95944	6.01177	8.76058	8.26165
5.84	4.32065	5.96084	6.01571	8.76327	8.26595
5.84333	4.32575	5.96525	6.02172	8.76373	8.27036
5.84667	4.32982	5.97063	6.02657	8.76979	8.27335
5.85	4.32779	5.97391	6.02796	8.77125	8.27864
5.85333	4.33001	5.97798	6.03424	8.77167	8.27927
5.85667	4.33033	5.98326	6.03635	8.77218	8.27886
5.86	4.33298	5.98602	6.04029	8.77375	8.27778
5.86333	4.33426	5.99048	6.0446	8.77396	8.27649
5.86667	4.34216	5.99451	6.04892	8.77757	8.27768
5.87	4.34786	5.99752	6.04933	8.77825	8.27627
5.87333	4.3515	6.00092	6.05618	8.78063	8.28003
5.87667	4.35392	6.0062	6.05794	8.78324	8.28245
5.88	4.35658	6.00942	6.06262	8.78536	8.28709
5.88333	4.35786	6.01304	6.06505	8.78588	8.28517
5.88667	4.35987	6.01706	6.07179	8.78664	8.28876
5.89	4.36103	6.02138	6.07354	8.78714	8.28825
5.89333	4.35995	6.02503	6.07962	8.78832	8.29011
5.89667	4.3615	6.02671	6.0799	8.78871	8.2882
5.9	4.36585	6.03196	6.0857	8.78976	8.29336
5.90333	4.36331	6.03417	6.09104	8.79096	8.29289
5.90667	4.36386	6.03886	6.0969	8.79351	8.29577
5.91	4.36743	6.04183	6.10015	8.79371	8.29416
5.91333	4.37405	6.04544	6.10667	8.79773	8.29874
5.91667	4.37296	6.0476	6.10943	8.79805	8.29748
5.92	4.38004	6.05183	6.1099	8.80057	8.30012
5.92333	4.38714	6.05365	6.11106	8.80339	8.29721
5.92667	4.39171	6.05822	6.11573	8.80784	8.29897
5.93	4.39195	6.06277	6.11976	8.80705	8.30085
5.93333	4.3992	6.0676	6.12304	8.80971	8.30439
5.93667	4.40059	6.07203	6.12752	8.81438	8.30446
5.94	4.40052	6.0755	6.13496	8.81493	8.31015
5.94333	4.4032	6.07933	6.13671	8.81347	8.31134
5.94667	4.40696	6.08243	6.14017	8.81754	8.31146
5.95	4.40575	6.08459	6.14267	8.81859	8.31049
5.95333	4.40976	6.08729	6.14631	8.8177	8.3146
5.95667	4.41245	6.09219	6.14738	8.82019	8.31354
5.96	4.41491	6.0958	6.15164	8.82353	8.31395
5.96333	4.41706	6.10075	6.15287	8.82341	8.31429
5.96667	4.42025	6.10447	6.15838	8.82561	8.31788
5.97	4.42267	6.10942	6.16257	8.82491	8.31675
5.97333	4.42715	6.11283	6.16604	8.82619	8.31803
5.97667	4.43184	6.11399	6.16764	8.8255	8.32122
5.98	4.43618	6.11732	6.17407	8.82878	8.32331
5.98333	4.44248	6.12058	6.17819	8.83314	8.32195
5.98667	4.44621	6.12306	6.17991	8.83508	8.32368
5.99	4.4482	6.12651	6.18416	8.83584	8.32577
5.99333	4.44952	6.13219	6.1888	8.83898	8.32792
5.99667	4.45211	6.13589	6.19284	8.83868	8.32655
6	4.4517	6.13976	6.19628	8.8364	8.32722
6.00333	4.45254	6.14282	6.20178	8.83793	8.32797
6.00667	4.45648	6.14607	6.20718	8.84259	8.32906
6.01	4.46127	6.1504	6.21048	8.84348	8.32815
6.01333	4.46406	6.15238	6.21567	8.84574	8.33191
6.01667	4.46978	6.15641	6.21806	8.84895	8.33175
6.02	4.47366	6.15958	6.2232	8.85051	8.33382
6.02333	4.47543	6.16335	6.22564	8.84886	8.33475
6.02667	4.47941	6.16486	6.22804	8.85092	8.33599
6.03	4.48332	6.16767	6.2279	8.84984	8.33637
6.03333	4.48287	6.17187	6.23457	8.8504	8.341
6.03667	4.48648	6.1739	6.23563	8.85278	8.33983
6.04	4.48768	6.1784	6.23847	8.8525	8.33867
6.04333	4.48669	6.18301	6.24302	8.85221	8.34228
6.04667	4.488	6.18874	6.24683	8.85398	8.3426
6.05	4.48809	6.19079	6.24864	8.85551	8.3452
6.05333	4.48979	6.19623	6.25153	8.85488	8.34651
6.05667	4.495	6.19958	6.25529	8.85887	8.34939
6.06	4.49707	6.20146	6.25982	8.85859	8.34769
6.06333	4.49934	6.2047	6.26271	8.86301	8.34927
6.06667	4.50805	6.20854	6.26576	8.86587	8.34736
6.07	4.5102	6.21425	6.27036	8.86973	8.34973
6.07333	4.5126	6.21742	6.27463	8.86988	8.34935
6.07667	4.52052	6.22184	6.27808	8.87615	8.35312
6.08	4.52133	6.22507	6.28496	8.87781	8.3528
6.08333	4.51999	6.22767	6.28857	8.87716	8.35746
6.08667	4.52304	6.22877	6.29202	8.87685	8.35602
6.09	4.52493	6.23144	6.29427	8.88017	8.35849
6.09333	4.52424	6.23427	6.29682	8.8794	8.35704
6.09667	4.53008	6.23846	6.30037	8.87942	8.36003
6.1	4.53412	6.24174	6.30473	8.88155	8.35876
6.10333	4.5364	6.24465	6.30788	8.88295	8.36122
6.10667	4.53816	6.24861	6.31362	8.88571	8.36198
6.11	4.54352	6.25178	6.31627	8.8874	8.36286
6.11333	4.54473	6.25243	6.31791	8.88853	8.36306
6.11667	4.55116	6.25727	6.32067	8.89012	8.36172
6.12	4.55458	6.26043	6.32803	8.89316	8.36491
6.12333	4.55947	6.26316	6.33058	8.89131	8.36406
6.12667	4.5632	6.26795	6.33735	8.89397	8.36713
6.13	4.56708	6.27245	6.34281	8.8963	8.36874
6.13333	4.56845	6.27633	6.34643	8.89641	8.36792
6.13667	4.57169	6.28339	6.34654	8.89977	8.37057
6.14	4.57239	6.28622	6.34969	8.90288	8.37
6.14333	4.57142	6.28898	6.35055	8.9027	8.36907
6.14667	4.57487	6.29244	6.35166	8.90554	8.37307
6.15	4.57733	6.29314	6.35301	8.90694	8.37849
6.15333	4.57756	6.29394	6.355	8.9078	8.37707
6.15667	4.58165	6.2978	6.3572	8.9089	8.38369
6.16	4.58219	6.30175	6.3623	8.90967	8.38462
6.16333	4.58409	6.30646	6.36687	8.9093	8.381
6.16667	4.58585	6.31039	6.37268	8.91339	8.3824
6.17	4.58903	6.31317	6.37752	8.9135	8.38233
6.17333	4.59018	6.31648	6.38332	8.91436	8.38397
6.17667	4.59649	6.31879	6.38519	8.91795	8.38627
6.18	4.59723	6.3195	6.38795	8.91861	8.38954
6.18333	4.60221	6.32299	6.39037	8.92103	8.38949
6.18667	4.60517	6.32617	6.39702	8.92322	8.39112
6.19	4.60998	6.32876	6.39912	8.92556	8.38867
6.19333	4.61166	6.33129	6.40657	8.92792	8.38942
6.19667	4.61577	6.33474	6.40728	8.9296	8.38982
6.2	4.61622	6.33794	6.41059	8.92937	8.39134
6.20333	4.62168	6.34071	6.41036	8.93049	8.39269
6.20667	4.62465	6.34545	6.41324	8.93206	8.395
6.21	4.62707	6.34829	6.41323	8.93356	8.39463
6.21333	4.62877	6.35446	6.41873	8.93589	8.39712
6.21667	4.63298	6.35953	6.42071	8.937	8.39631
6.22	4.634	6.36312	6.42489	8.93728	8.39805
6.22333	4.63366	6.36601	6.42775	8.93704	8.401
6.22667	4.63985	6.3706	6.43194	8.93859	8.40306
6.23	4.64457	6.37197	6.43499	8.93876	8.40142
6.23333	4.64611	6.37372	6.44026	8.93988	8.40362
6.23667	4.64706	6.37705	6.44372	8.9415	8.40342
6.24	4.65259	6.37967	6.44605	8.9454	8.40282
6.24333	4.65301	6.38144	6.44909	8.94404	8.40514
6.24667	4.65325	6.38469	6.45202	8.94664	8.40746
6.25	4.65597	6.38706	6.45327	8.94881	8.4078
6.25333	4.659	6.39083	6.45514	8.94948	8.40656
6.25667	4.65706	6.39243	6.45912	8.94991	8.40672
6.26	4.65822	6.39628	6.46448	8.95274	8.40576
6.26333	4.66081	6.39771	6.46997	8.95332	8.40882
6.26667	4.65927	6.40199	6.47324	8.9537	8.41095
6.27	4.66146	6.40374	6.47725	8.95731	8.41658
6.27333	4.66614	6.40715	6.48248	8.95677	8.41884
6.27667	4.66723	6.41028	6.48242	8.95734	8.42004
6.28	4.6678	6.41545	6.48307	8.96006	8.4161
6.28333	4.67481	6.41866	6.48547	8.96172	8.42308
6.28667	4.67502	6.42308	6.4923	8.96172	8.41874
6.29	4.67799	6.42812	6.49414	8.96539	8.41963
6.29333	4.68184	6.43035	6.50023	8.9659	8.41768
6.29667	4.68552	6.43379	6.50583	8.96737	8.42301
6.3	4.68499	6.43763	6.51125	8.9659	8.41975
6.30333	4.69242	6.44056	6.51213	8.96823	8.42355
6.30667	4.69473	6.44216	6.51829	8.96918	8.42263
6.31	4.69644	6.44716	6.51872	8.97449	8.42828
6.31333	4.70101	6.44792	6.52317	8.97412	8.42813
6.31667	4.70421	6.44809	6.52512	8.97835	8.43002
6.32	4.7047	6.45013	6.52866	8.9793	8.42998
6.32333	4.70948	6.4537	6.52967	8.97792	8.43283
6.32667	4.71435	6.45782	6.53413	8.977	8.43445
6.33	4.71786	6.46159	6.53621	8.97806	8.43534
6.33333	4.72117	6.46446	6.54061	8.98002	8.43417
6.33667	4.72243	6.46788	6.54279	8.9812	8.43789
6.34	4.72387	6.46989	6.54671	8.9844	8.43752
6.34333	4.72222	6.47038	6.54775	8.9876	8.43893
6.34667	4.72167	6.47402	6.54954	8.99061	8.44057
6.35	4.72079	6.47779	6.5519	8.99174	8.44242
6.35333	4.7258	6.48037	6.5555	8.99222	8.44056
6.35667	4.72671	6.48389	6.5579	8.99464	8.44393
6.36	4.72943	6.48733	6.56368	8.9943	8.44199
6.36333	4.73219	6.48893	6.56664	8.99395	8.44317
6.36667	4.7396	6.49339	6.57083	8.99502	8.44426
6.37	4.74246	6.49669	6.57419	8.99623	8.44637
6.37333	4.74635	6.50016	6.57513	8.99622	8.44649
6.37667	4.75139	6.50489	6.57805	8.99706	8.44627
6.38	4.75497	6.50831	6.58241	8.99948	8.44603
6.38333	4.75531	6.51291	6.58502	8.99914	8.44503
6.38667	4.75616	6.51741	6.58676	9.00033	8.44696
6.39	4.756	6.52082	6.59217	9.00406	8.44647
6.39333	4.75878	6.52108	6.59443	9.00425	8.44857
6.39667	4.76006	6.52377	6.5959	9.00497	8.44673
6.4	4.76363	6.5264	6.59754	9.00823	8.44656
6.40333	4.76582	6.52894	6.60268	9.01153	8.44405
6.40667	4.77012	6.53008	6.60603	9.01153	8.44977
6.41	4.77001	6.53484	6.60895	9.01548	8.44989
6.41333	4.77278	6.53789	6.61067	9.01684	8.4535
6.41667	4.77429	6.53843	6.61561	9.01674	8.45774
6.42	4.77706	6.5388	6.61882	9.01808	8.45894
6.42333	4.77988	6.5451	6.6211	9.01741	8.45713
6.42667	4.78121	6.54481	6.62399	9.01891	8.46191
6.43	4.78322	6.54723	6.62906	9.02014	8.46135
6.43333	4.78687	6.54967	6.63087	9.02141	8.46139
6.43667	4.78715	6.55408	6.63246	9.02149	8.46433
6.44	4.78912	6.55547	6.63673	9.02511	8.46642
6.44333	4.79573	6.55976	6.64046	9.0236	8.46645
6.44667	4.79972	6.56356	6.64024	9.02584	8.47052
6.45	4.80145	6.56552	6.643	9.02785	8.47093
6.45333	4.80321	6.56902	6.65011	9.02743	8.47381
6.45667	4.80735	6.57076	6.65301	9.02756	8.47374
6.46	4.81038	6.57382	6.65379	9.02768	8.47518
6.46333	4.80791	6.57758	6.66206	9.02756	8.47359
6.46667	4.80935	6.58188	6.66381	9.02998	8.4728
6.47	4.81301	6.58429	6.66341	9.03433	8.4717
6.47333	4.80861	6.58784	6.66543	9.03487	8.47373
6.47667	4.80545	6.59264	6.66933	9.03917	8.4725
6.48	4.80993	6.59627	6.67122	9.0415	8.47372
6.48333	4.80964	6.59936	6.6766	9.04177	8.47466
6.48667	4.81118	6.60183	6.67826	9.04172	8.47642
6.49	4.8178	6.60519	6.68045	9.04371	8.47565
6.49333	4.8231	6.60707	6.68389	9.04477	8.47794
6.49667	4.82647	6.60999	6.68593	9.04485	8.47879
6.5	4.83112	6.61281	6.6883	9.0449	8.48475
6.50333	4.83812	6.61526	6.69387	9.04568	8.48458
6.50667	4.84005	6.61603	6.69721	9.04732	8.48373
6.51	4.84626	6.6181	6.69988	9.04909	8.48549
6.51333	4.85028	6.61705	6.70185	9.05035	8.48597
6.51667	4.85465	6.6212	6.70451	9.05268	8.48008
6.52	4.85314	6.62288	6.70551	9.05439	8.4818
6.52333	4.85691	6.62779	6.70844	9.05507	8.48361
6.52667	4.85619	6.62872	6.71182	9.05659	8.48436
6.53	4.85829	6.63325	6.71601	9.05794	8.48536
6.53333	4.86204	6.63513	6.72119	9.05881	8.48974
6.53667	4.86482	6.63908	6.72598	9.06003	8.49209
6.54	4.86922	6.64158	6.72977	9.06006	8.49442
6.54333	4.87138	6.64652	6.72931	9.05846	8.49406
6.54667	4.86912	6.64904	6.73161	9.06093	8.49662
6.55	4.8686	6.65237	6.73186	9.06123	8.49755
6.55333	4.87217	6.65488	6.73528	9.06344	8.49494
6.55667	4.87164	6.65654	6.73819	9.06647	8.49514
6.56	4.87375	6.65825	6.74261	9.06791	8.49741
6.56333	4.87974	6.66248	6.74558	9.06914	8.49732
6.56667	4.88256	6.66462	6.74708	9.07234	8.49921
6.57	4.8842	6.66918	6.74984	9.07274	8.49955
6.57333	4.88672	6.67257	6.75263	9.07324	8.49801
6.57667	4.89047	6.67597	6.75585	9.07608	8.49532
6.58	4.89332	6.6775	6.75964	9.07515	8.4951
6.58333	4.89459	6.68049	6.76214	9.07735	8.49355
6.58667	4.89745	6.68155	6.76619	9.07795	8.49754
6.59	4.90107	6.68703	6.76608	9.07914	8.49866
6.59333	4.90301	6.68936	6.77074	9.07949	8.50139
6.59667	4.90276	6.69168	6.7722	9.0813	8.50533
6.6	4.90425	6.693	6.77746	9.08086	8.50684
6.60333	4.90627	6.69719	6.77687	9.08201	8.50854
6.60667	4.90887	6.69578	6.78256	9.08273	8.5119
6.61	4.90931	6.69794	6.78441	9.08408	8.51505
6.61333	4.91206	6.7014	6.78785	9.08798	8.51582
6.61667	4.91428	6.70517	6.79183	9.08843	8.5189
6.62	4.91338	6.70659	6.7954	9.09082	8.51603
6.62333	4.91285	6.71211	6.79946	9.09232	8.51807
6.62667	4.91382	6.71475	6.80295	9.09383	8.51757
6.63	4.91537	6.71602	6.80385	9.09348	8.51716
6.63333	4.91946	6.71753	6.80567	9.09428	8.51718
6.63667	4.92263	6.7187	6.8094	9.09576	8.52292
6.64	4.92215	6.71896	6.80828	9.09636	8.52126
6.64333	4.92399	6.72275	6.80976	9.09747	8.52449
6.64667	4.92514	6.72689	6.81517	9.09799	8.5253
6.65	4.92484	6.7286	6.81689	9.10146	8.52737
6.65333	4.92764	6.73328	6.81956	9.10168	8.52733
6.65667	4.93296	6.73582	6.826	9.10512	8.52767
6.66	4.9352	6.73743	6.83082	9.10702	8.52676
[truncated: 7,151 more rows]
