# Supplementary material for: Early steps of protein disaggregation by Hsp70 chaperone and class B J-domain proteins are shaped by Hsp110
Source: eLife. 2024 Oct 15;13:RP94795. doi: 10.7554/eLife.94795 (PMC11479587; doi:10.7554/eLife.94795)
Supplement: Figure 1—figure supplement 3—source data 1. [file elife-94795-fig1-figsupp3-data1.xlsx]

## Sheet: Figure 1—figure supplement 3A
	Sis1, Ssa1			Sis1, Ssa1, 0,1uM Sse1			Sis1, Ssa1, 1uM Sse1			Sis1, Ssa1, 0,1uM Fes1			Sis1, Ssa1, 0,5uM Fes1			Sis1, Ssa1, 1uM Fes1
activity (%)	1.93915	2.20328	1.74166	3.22969	3.23439	2.85961	0.162347	0.077155	0.117425	2.21106	2.75719	1.80147	2.62138	3.16039	2.4774	3.7122	3.26634	2.8202
