# Supplementary material for: Early steps of protein disaggregation by Hsp70 chaperone and class B J-domain proteins are shaped by Hsp110
Source: eLife. 2024 Oct 15;13:RP94795. doi: 10.7554/eLife.94795 (PMC11479587; doi:10.7554/eLife.94795)
Supplement: Figure 1—figure supplement 3—source data 2. [file elife-94795-fig1-figsupp3-data2.xlsx]

## Sheet: Figure 1—figure supplement 3B
replicate 1						replicate 2
Time (min)	Sis1, Ssa1	Sis1, Ssa1, 0,1uM Fes1	Sis1, Ssa1, 1uM Fes1	Sis1, Ssa1, 0,1uM Sse		Time (min)	Sis1, Ssa1	Sis1, Ssa1, 0,1uM Sse	Sis1, Ssa1, 1uM Fes1	Sis1, Ssa1, 0,1uM Fes1
0	0	0	0	0		0	0	0	0
0.00333333	-0.00024856	0.00081304	-0.00267899	-0.00139134		0.00333333	0.00963886	-0.00393576	-0.00014759	0.0053057
0.00666667	-0.00746365	-0.00309537	-0.00572167	-0.00886029		0.00666667	0.0074222	-0.00985628	-0.0031794	0.0039362
0.01	-0.00518641	-0.00672704	-0.00544604	-0.00587061		0.01	0.0100957	-0.00800406	-0.00066462	0.00467595
0.0133333	-0.00313595	-0.00533149	-0.00433917	-0.00320333		0.0133333	0.0122936	-0.00730673	-0.00968904	0.00667793
0.0166667	-0.00223805	-0.00681268	-0.000855	-0.00466304		0.0166667	0.0140759	-0.0115306	-0.0076523	0.00462116
0.02	-0.00846209	-0.00787958	-0.00639458	-0.00488722		0.02	0.0111674	-0.0135339	-0.00690365	0.00716801
0.0233333	-0.00803673	-0.00901945	-0.00650356	-0.00206682		0.0233333	0.010701	-0.00975139	-0.00970039	0.00661088
0.0266667	-0.002102	-0.00880156	-0.00390741	-0.00663984		0.0266667	0.0122887	-0.0108396	-0.0103643	0.00667591
0.03	-0.011886	-0.00851761	-0.00524088	-0.0113707		0.03	0.0146708	-0.0149348	-0.00976882	0.00690139
0.0333333	-0.012761	-0.0110647	-0.00891759	-0.00855967		0.0333333	0.00991185	-0.014164	-0.013997	0.00911305
0.0366667	-0.0073364	-0.0125176	-0.00438441	-0.00734967		0.0366667	0.0109571	-0.0140695	-0.0129947	0.00417577
0.04	-0.0126234	-0.0126102	-0.00495432	-0.01252		0.04	0.0152421	-0.0145332	-0.0146178	0.0048488
0.0433333	-0.0161646	-0.0111646	-0.00768239	-0.00727396		0.0433333	0.0115917	-0.0142142	-0.0142939	0.00419633
0.0466667	-0.0118057	-0.0113951	-0.00918314	-0.00808457		0.0466667	0.00821792	-0.0160118	-0.0141989	0.00401421
0.05	-0.0151305	-0.00934298	-0.00459779	-0.0115979		0.05	0.0134564	-0.0161578	-0.0184346	0.00375238
0.0533333	-0.0141099	-0.0121342	-0.0079555	-0.00947848		0.0533333	0.0148269	-0.012581	-0.0166159	0.0042025
0.0566667	-0.0106921	-0.0102377	-0.0119369	-0.0100288		0.0566667	0.0141487	-0.0142238	-0.014799	0.00406159
0.06	-0.0096652	-0.0135735	-0.0101621	-0.00725192		0.06	0.01398	-0.0139255	-0.0136324	0.00273967
0.0633333	-0.0176285	-0.0117493	-0.00774991	-0.0161725		0.0633333	0.0154187	-0.0150898	-0.0154918	-0.00171625
0.0666667	-0.0134355	-0.0072094	-0.00988135	-0.012159		0.0666667	0.0137361	-0.0168754	-0.0173106	-0.00327347
0.07	-0.0163497	-0.00769926	-0.0128406	-0.00741267		0.07	0.0146535	-0.0140375	-0.0156083	-0.0041545
0.0733333	-0.0120984	-0.0189652	-0.00871123	-0.00933155		0.0733333	0.0132001	-0.0203153	-0.0164792	-0.00470774
0.0766667	-0.013292	-0.0145134	-0.0111313	-0.00953474		0.0766667	0.0138539	-0.0202761	-0.0186181	-0.00346452
0.08	-0.0137334	-0.0119747	-0.0110876	-0.0136097		0.08	0.012227	-0.0188551	-0.0200337	-0.00196117
0.0833333	-0.0163276	-0.0119277	-0.0151641	-0.0109268		0.0833333	0.0141663	-0.0118256	-0.0199755	-0.00242364
0.0866667	-0.0142514	-0.0122517	-0.01301	-0.00921645		0.0866667	0.012974	-0.0150435	-0.0190642	-0.000233192
0.09	-0.0159546	-0.0114256	-0.0166586	-0.00857957		0.09	0.0141828	-0.0228301	-0.0170968	0.000338771
0.0933333	-0.0140314	-0.0171717	-0.0141021	-0.0154186		0.0933333	0.0157586	-0.0208297	-0.0189367	0.000624654
0.0966667	-0.0145016	-0.0130139	-0.0131718	-0.0116303		0.0966667	0.016133	-0.0206386	-0.0195805	0.0014744
0.1	-0.0132032	-0.0107566	-0.0161567	-0.0113934		0.1	0.01436	-0.0152671	-0.0197039	0.00246545
0.103333	-0.0201139	-0.0160362	-0.0154704	-0.0113703		0.103333	0.0149244	-0.0186683	-0.0198871	0.00173153
0.106667	-0.0149099	-0.013474	-0.0150039	-0.0144166		0.106667	0.0135392	-0.0206169	-0.0191936	0.000624941
0.11	-0.0118601	-0.0172246	-0.0194116	-0.012145		0.11	0.0112651	-0.024039	-0.0177519	-0.0014471
0.113333	-0.0136162	-0.0167476	-0.0238422	-0.0138993		0.113333	0.0095754	-0.0247369	-0.0192007	-0.00284074
0.116667	-0.0150439	-0.016844	-0.0209762	-0.00976423		0.116667	0.0109064	-0.0194802	-0.0224655	-0.00205119
0.12	-0.0151889	-0.0126001	-0.0158976	-0.0116795		0.12	0.00960711	-0.0257021	-0.0182065	-0.00516533
0.123333	-0.0149723	-0.0143791	-0.0155724	-0.013141		0.123333	0.0120935	-0.0218547	-0.0226246	-0.00379938
0.126667	-0.0105396	-0.0162983	-0.0162344	-0.0131493		0.126667	0.0139397	-0.0240691	-0.0204252	-0.00413728
0.13	-0.019485	-0.0144451	-0.0201921	-0.0134922		0.13	0.0144542	-0.0228333	-0.0234886	-0.00303974
0.133333	-0.0175233	-0.0183523	-0.0226282	-0.0163423		0.133333	0.0120668	-0.0229656	-0.0217469	-0.00462334
0.136667	-0.0180558	-0.0114453	-0.0183441	-0.01617		0.136667	0.012521	-0.0205041	-0.0182198	-0.00501099
0.14	-0.0138522	-0.0157062	-0.0197246	-0.0160086		0.14	0.0106094	-0.0231728	-0.0222553	-0.00662703
0.143333	-0.0170156	-0.0136738	-0.0214303	-0.0105006		0.143333	0.012225	-0.0230051	-0.0285033	-0.00595004
0.146667	-0.0180576	-0.0204136	-0.0229519	-0.0140518		0.146667	0.0158952	-0.0233683	-0.0226895	-0.00597629
0.15	-0.0172675	-0.0153506	-0.0177393	-0.0139044		0.15	0.0168672	-0.028029	-0.0251646	-0.00424496
0.153333	-0.0193751	-0.0152623	-0.0232254	-0.0147402		0.153333	0.0176816	-0.0233892	-0.0215213	-0.00136856
0.156667	-0.018552	-0.0161381	-0.018104	-0.015908		0.156667	0.0171648	-0.0292602	-0.0234832	-0.00190604
0.16	-0.0171084	-0.0143282	-0.0156932	-0.0164663		0.16	0.0158002	-0.0288332	-0.0267736	-0.00191254
0.163333	-0.0202839	-0.0136109	-0.0210385	-0.0172376		0.163333	0.013813	-0.0257058	-0.027082	-0.00202341
0.166667	-0.0176454	-0.0189769	-0.0199767	-0.0136953		0.166667	0.0115658	-0.0277876	-0.0226005	-0.00512049
0.17	-0.0155474	-0.0188414	-0.0262485	-0.0150832		0.17	0.0123368	-0.0277251	-0.0227561	-0.00453019
0.173333	-0.015444	-0.0196586	-0.0203169	-0.0160141		0.173333	0.0139859	-0.0288082	-0.0254917	-0.00372457
0.176667	-0.0237833	-0.022594	-0.0222158	-0.0152746		0.176667	0.0134561	-0.0269168	-0.025598	-0.00334993
0.18	-0.0219892	-0.018977	-0.0243344	-0.0127232		0.18	0.0152215	-0.0268416	-0.0312159	-0.00300976
0.183333	-0.0157706	-0.018724	-0.0202995	-0.0136125		0.183333	0.0195233	-0.0278998	-0.0281363	-0.00129245
0.186667	-0.0223149	-0.0152061	-0.0238258	-0.0130591		0.186667	0.0184454	-0.0259976	-0.0235362	-0.00145002
0.19	-0.0193629	-0.0178725	-0.0248922	-0.0175764		0.19	0.0174138	-0.0256977	-0.0288642	-0.00282265
0.193333	-0.0177857	-0.0143254	-0.0266863	-0.0167748		0.193333	0.0167798	-0.0284246	-0.028958	-0.00280961
0.196667	-0.0213115	-0.0196387	-0.0290241	-0.0157337		0.196667	0.0151192	-0.0318056	-0.028497	-0.00422109
0.2	-0.018435	-0.0183317	-0.0299333	-0.0173758		0.2	0.0143034	-0.0338731	-0.0325511	-0.0063517
0.203333	-0.0224056	-0.0206978	-0.024668	-0.014073		0.203333	0.0138741	-0.0322041	-0.0319495	-0.00799216
0.206667	-0.0210193	-0.0231796	-0.0222752	-0.0140719		0.206667	0.0130364	-0.03391	-0.0313757	-0.007542
0.21	-0.0182378	-0.0180035	-0.0285924	-0.0130543		0.21	0.0157785	-0.0339274	-0.0262664	-0.00785377
0.213333	-0.0207638	-0.0171554	-0.0264908	-0.0188375		0.213333	0.0171658	-0.027579	-0.0330175	-0.00688561
0.216667	-0.0258844	-0.0202444	-0.0276663	-0.0149558		0.216667	0.0173875	-0.0332915	-0.0310261	-0.0030078
0.22	-0.0248389	-0.0150334	-0.0262726	-0.0203522		0.22	0.0199782	-0.0315711	-0.0310437	-0.00109548
0.223333	-0.0204075	-0.021906	-0.0280139	-0.0168828		0.223333	0.0230402	-0.0312616	-0.0286005	2.43789e-05
0.226667	-0.0235369	-0.0167744	-0.0309655	-0.0151709		0.226667	0.0212131	-0.0335239	-0.0291923	-0.000298567
0.23	-0.0215643	-0.0182913	-0.0278345	-0.0121614		0.23	0.0194772	-0.033159	-0.0327871	-0.00197082
0.233333	-0.0249505	-0.0194299	-0.0304261	-0.0134933		0.233333	0.0192588	-0.0314609	-0.0326266	-0.00315538
0.236667	-0.0206506	-0.0151952	-0.0292142	-0.0142809		0.236667	0.0160501	-0.0313845	-0.0308258	-0.00359949
0.24	-0.0234857	-0.0248966	-0.0231405	-0.0178236		0.24	0.012905	-0.0302322	-0.0305451	-0.00348758
0.243333	-0.0211118	-0.0181491	-0.0274056	-0.0165751		0.243333	0.0123963	-0.0372301	-0.0328164	-0.00263658
0.246667	-0.0246225	-0.0171883	-0.0315529	-0.0156976		0.246667	0.00981735	-0.0360414	-0.0367555	-0.00219456
0.25	-0.0257668	-0.0203811	-0.0259993	-0.0176898		0.25	0.00929378	-0.0363156	-0.0293078	-0.00213316
0.253333	-0.0257186	-0.0226272	-0.0314184	-0.017069		0.253333	0.00915381	-0.0388087	-0.0345645	-0.00276005
0.256667	-0.0264712	-0.0184544	-0.0300348	-0.0177894		0.256667	0.00974073	-0.0328928	-0.0315604	-0.00403069
0.26	-0.0234116	-0.0226904	-0.0278092	-0.0143943		0.26	0.0094458	-0.0312123	-0.0349942	-0.00429647
0.263333	-0.0205821	-0.02023	-0.0330911	-0.0163894		0.263333	0.0105216	-0.0357313	-0.0329691	-0.00498964
0.266667	-0.0260739	-0.0224112	-0.0269964	-0.0167189		0.266667	0.00772969	-0.0365473	-0.0332632	-0.00733997
0.27	-0.0245169	-0.0241022	-0.0268597	-0.0172035		0.27	0.00660859	-0.0364691	-0.0328625	-0.00758892
0.273333	-0.0264965	-0.0253503	-0.0287383	-0.0169954		0.273333	0.00543083	-0.0355546	-0.0368551	-0.00707762
0.276667	-0.0253562	-0.023091	-0.0297779	-0.0179615		0.276667	0.00429817	-0.0349108	-0.0356116	-0.00762484
0.28	-0.0256683	-0.021055	-0.0296177	-0.0179422		0.28	0.0041148	-0.0344896	-0.0374876	-0.00663892
0.283333	-0.0266576	-0.0224339	-0.0293135	-0.0164455		0.283333	0.0064789	-0.0329001	-0.035693	-0.00290103
0.286667	-0.025314	-0.0194209	-0.0315754	-0.0248262		0.286667	0.00471684	-0.0359954	-0.0376183	-0.00206132
0.29	-0.0250949	-0.0233564	-0.0322513	-0.0207516		0.29	0.0046666	-0.0403866	-0.0374222	-0.00270872
0.293333	-0.0228213	-0.022113	-0.0325917	-0.0174964		0.293333	0.00463215	-0.0410747	-0.0371559	-0.00279583
0.296667	-0.0254991	-0.0231114	-0.0310382	-0.015118		0.296667	0.00479215	-0.0405855	-0.0345512	-0.00128762
0.3	-0.0233504	-0.0209187	-0.0338117	-0.019433		0.3	0.00402886	-0.0438386	-0.0343667	-0.00386278
0.303333	-0.0275013	-0.0262978	-0.0314948	-0.0182626		0.303333	0.00511014	-0.0359448	-0.0351543	-0.00612995
0.306667	-0.0263779	-0.023417	-0.031309	-0.0206102		0.306667	0.00672097	-0.0401867	-0.0358367	-0.0039289
0.31	-0.0266054	-0.0186047	-0.0326198	-0.0193898		0.31	0.00950422	-0.0427867	-0.0435664	-0.00356332
0.313333	-0.0270607	-0.0179161	-0.0317617	-0.0205717		0.313333	0.0116994	-0.0450178	-0.0402889	-0.00578542
0.316667	-0.0261957	-0.0255818	-0.0365334	-0.0221457		0.316667	0.0110214	-0.0381687	-0.0381254	-0.00422738
0.32	-0.0229866	-0.0245284	-0.0317515	-0.0214141		0.32	0.00855651	-0.0426144	-0.0416013	-0.0054607
0.323333	-0.0285535	-0.0231865	-0.0373264	-0.0185151		0.323333	0.00809992	-0.0413566	-0.0394015	-0.00695209
0.326667	-0.0275278	-0.0275368	-0.0345136	-0.0228906		0.326667	0.00543237	-0.0451242	-0.0396197	-0.00797605
0.33	-0.0262532	-0.0262898	-0.0311101	-0.0207061		0.33	0.00285696	-0.0444874	-0.040733	-0.00719055
0.333333	-0.0280234	-0.0299483	-0.0298876	-0.0207629		0.333333	0.0025496	-0.0408177	-0.0370012	-0.00846884
0.336667	-0.0278473	-0.026818	-0.0420215	-0.0198956		0.336667	0.00566139	-0.0418596	-0.0396462	-0.00532478
0.34	-0.0250244	-0.0237419	-0.0394521	-0.020314		0.34	0.00666794	-0.0438144	-0.0393735	-0.00396342
0.343333	-0.032849	-0.0232001	-0.0366107	-0.0218965		0.343333	0.00968858	-0.0432975	-0.0411791	-0.0028454
0.346667	-0.0289225	-0.0217302	-0.0351157	-0.0192597		0.346667	0.0122334	-0.0437466	-0.040997	-0.00360098
0.35	-0.026328	-0.0221383	-0.0412725	-0.0208224		0.35	0.013887	-0.043107	-0.041695	-0.00355986
0.353333	-0.0301338	-0.0241822	-0.0365858	-0.0187189		0.353333	0.0122793	-0.0430766	-0.0428851	-0.00402229
0.356667	-0.0308415	-0.0214576	-0.0406226	-0.0202283		0.356667	0.0112247	-0.044333	-0.0428403	-0.00626473
0.36	-0.0316674	-0.0206447	-0.038472	-0.0228321		0.36	0.00786918	-0.0475595	-0.0455781	-0.00694715
0.363333	-0.0308067	-0.0241031	-0.0400476	-0.0200959		0.363333	0.00726203	-0.0451275	-0.0425001	-0.00601618
0.366667	-0.0314816	-0.0258316	-0.0376109	-0.0216268		0.366667	0.00642546	-0.0462563	-0.0448655	-0.0068901
0.37	-0.0318324	-0.0280726	-0.0387512	-0.0247197		0.37	0.00843415	-0.0458423	-0.044243	-0.00759435
0.373333	-0.0325039	-0.0271341	-0.035892	-0.01777		0.373333	0.00794424	-0.0471142	-0.0431333	-0.00644662
0.376667	-0.0309501	-0.0292101	-0.0355733	-0.0210852		0.376667	0.0106565	-0.0450174	-0.0423168	-0.00643385
0.38	-0.0289066	-0.0264446	-0.0424293	-0.018849		0.38	0.0120296	-0.0461651	-0.0439741	-0.00716033
0.383333	-0.0310002	-0.0261778	-0.0380749	-0.0260716		0.383333	0.0136888	-0.0491505	-0.0427384	-0.007533
0.386667	-0.028982	-0.0283561	-0.0386315	-0.0229544		0.386667	0.0142466	-0.047017	-0.0435017	-0.00781774
0.39	-0.0312923	-0.0259841	-0.0392668	-0.0181233		0.39	0.0138072	-0.0485965	-0.0459703	-0.00979155
0.393333	-0.0306446	-0.0263716	-0.040699	-0.0246645		0.393333	0.0113921	-0.0477586	-0.0427109	-0.00893745
0.396667	-0.0284439	-0.0274181	-0.037283	-0.0238254		0.396667	0.00808374	-0.051201	-0.0437051	-0.0079766
0.4	-0.0278228	-0.0269185	-0.040409	-0.025724		0.4	0.00607994	-0.0506719	-0.0432944	-0.00724549
0.403333	-0.0334122	-0.0319948	-0.0392418	-0.0250307		0.403333	0.0049153	-0.0469645	-0.0463354	-0.0059979
0.406667	-0.0369074	-0.0251478	-0.0403398	-0.0257428		0.406667	0.0061389	-0.0492431	-0.0474498	-0.00393078
0.41	-0.0353983	-0.0300624	-0.0373346	-0.0227097		0.41	0.0062762	-0.0485847	-0.0436444	-0.00283858
0.413333	-0.0342315	-0.0280564	-0.0396544	-0.0226826		0.413333	0.00898573	-0.0505862	-0.0482	-0.00357097
0.416667	-0.0353678	-0.0279955	-0.0433755	-0.025305		0.416667	0.00875105	-0.0514338	-0.0449045	-0.00527741
0.42	-0.0341005	-0.0265249	-0.0371302	-0.0245732		0.42	0.0107448	-0.0537385	-0.0458179	-0.00748772
0.423333	-0.0332288	-0.0273465	-0.0434377	-0.0227707		0.423333	0.0109963	-0.0517485	-0.0506399	-0.00641874
0.426667	-0.0288543	-0.0249806	-0.0361866	-0.0222852		0.426667	0.0143526	-0.0549036	-0.0520083	-0.00783297
0.43	-0.0342106	-0.0300347	-0.0394191	-0.0248915		0.43	0.0149072	-0.0519385	-0.0479614	-0.00777363
0.433333	-0.0342174	-0.0271667	-0.0446451	-0.0273435		0.433333	0.0144795	-0.0522678	-0.0499578	-0.00730479
0.436667	-0.0354168	-0.0283137	-0.0437671	-0.0223522		0.436667	0.0122982	-0.056797	-0.046137	-0.00614548
0.44	-0.0338969	-0.0268521	-0.045211	-0.0219796		0.44	0.0113794	-0.0549717	-0.048385	-0.00616945
0.443333	-0.036209	-0.0236591	-0.0415541	-0.0253363		0.443333	0.0102877	-0.0524926	-0.0442033	-0.0070057
0.446667	-0.0363967	-0.024313	-0.0395945	-0.0214201		0.446667	0.00799681	-0.0569587	-0.0484761	-0.00631941
0.45	-0.0356843	-0.0328503	-0.0449767	-0.0238765		0.45	0.00891391	-0.0568252	-0.0491812	-0.00552671
0.453333	-0.035963	-0.0278926	-0.0473228	-0.0249939		0.453333	0.0107441	-0.0525586	-0.0516579	-0.0077605
0.456667	-0.0365646	-0.0281812	-0.0454499	-0.0289323		0.456667	0.00892216	-0.0574687	-0.046668	-0.0102399
0.46	-0.0392223	-0.0287441	-0.0442587	-0.0283723		0.46	0.00934843	-0.056101	-0.0475878	-0.0106567
0.463333	-0.0354335	-0.033461	-0.045292	-0.025351		0.463333	0.00963462	-0.0529159	-0.0524927	-0.0124172
0.466667	-0.0376841	-0.0277794	-0.0431419	-0.0242103		0.466667	0.00815474	-0.056433	-0.0496746	-0.0130625
0.47	-0.036747	-0.0312279	-0.0453469	-0.0215842		0.47	0.00848082	-0.058709	-0.0545821	-0.0111473
0.473333	-0.0379449	-0.0310008	-0.0467843	-0.0251714		0.473333	0.00983759	-0.058375	-0.050936	-0.0129151
0.476667	-0.0330816	-0.025839	-0.04792	-0.027346		0.476667	0.0121401	-0.0530741	-0.0522948	-0.012571
0.48	-0.0381428	-0.0278584	-0.0413899	-0.0294758		0.48	0.0146691	-0.0568665	-0.0499845	-0.01101
0.483333	-0.0339912	-0.028659	-0.0505343	-0.0260091		0.483333	0.0168323	-0.0578422	-0.0510248	-0.00935784
0.486667	-0.0354354	-0.0341562	-0.0437604	-0.026322		0.486667	0.0156634	-0.0554145	-0.0528481	-0.0107534
0.49	-0.0351224	-0.0297982	-0.0458373	-0.0271007		0.49	0.0174828	-0.0596755	-0.0522602	-0.00728887
0.493333	-0.0370035	-0.0296691	-0.0473816	-0.0276419		0.493333	0.0134379	-0.0555353	-0.048306	-0.00659129
0.496667	-0.037677	-0.0300665	-0.0464523	-0.0235219		0.496667	0.011898	-0.0573697	-0.0539051	-0.00651518
0.5	-0.054107	-0.0413019	-0.0834379	-0.0387777		0.5	0.0717052	-0.133841	-0.112308	0.0811783
0.503333	-0.0456738	-0.027703	-0.0714701	-0.02504		0.503333	0.0776153	-0.131801	-0.106734	0.0867865
0.506667	-0.0464526	-0.0209805	-0.066755	-0.018279		0.506667	0.0823678	-0.130565	-0.110843	0.0790703
0.51	-0.0432956	-0.0227086	-0.0626892	-0.0145007		0.51	0.0762873	-0.126572	-0.100384	0.0781132
0.513333	-0.0408755	-0.0177858	-0.0597983	-0.0106676		0.513333	0.0829164	-0.122889	-0.102681	0.0837705
0.516667	-0.0446764	-0.01238	-0.05457	-0.011803		0.516667	0.0863101	-0.114212	-0.103042	0.0827177
0.52	-0.0418474	-0.0107354	-0.0541116	-0.00603101		0.52	0.0854041	-0.116524	-0.101957	0.0820165
0.523333	-0.0386026	-0.009239	-0.0541591	-0.00495684		0.523333	0.086075	-0.117259	-0.0983166	0.0828432
0.526667	-0.0355356	-0.00892187	-0.0485721	0.00174465		0.526667	0.087583	-0.114771	-0.0963601	0.0827762
0.53	-0.0378745	-0.00595873	-0.0464441	-0.00162416		0.53	0.08825	-0.121461	-0.0996642	0.0825785
0.533333	-0.040163	-0.00768664	-0.0437124	0.00363267		0.533333	0.086554	-0.109529	-0.0963027	0.083775
0.536667	-0.0355527	-0.00493936	-0.0424006	0.0036616		0.536667	0.0882547	-0.109467	-0.0942334	0.0851664
0.54	-0.0374232	-0.00417371	-0.0434489	0.00198593		0.54	0.0882064	-0.112565	-0.0943008	0.0864915
0.543333	-0.028295	-0.00470053	-0.0379692	0.00327258		0.543333	0.088665	-0.109124	-0.0961155	0.0889645
0.546667	-0.0329017	-0.00487511	-0.0375658	0.00709202		0.546667	0.0887151	-0.109026	-0.0997064	0.0902903
0.55	-0.031423	-0.00235498	-0.0397458	0.0123176		0.55	0.0896411	-0.108399	-0.0927381	0.0911047
0.553333	-0.0312224	-0.00025561	-0.0409254	0.00678766		0.553333	0.0891104	-0.107627	-0.0944967	0.0913414
0.556667	-0.0316549	0.00033478	-0.0327473	0.00820152		0.556667	0.0878883	-0.107091	-0.0961855	0.0921943
0.56	-0.0301223	-0.00014224	-0.0387565	0.0105621		0.56	0.0877963	-0.105583	-0.0912668	0.0919384
0.563333	-0.0353081	0.00417462	-0.0343177	0.00982077		0.563333	0.0869787	-0.105881	-0.0882856	0.0914636
0.566667	-0.029061	0.00570041	-0.0341434	0.0115234		0.566667	0.0875929	-0.10423	-0.0862227	0.0916198
0.57	-0.0285279	0.00869839	-0.0291488	0.019033		0.57	0.0889288	-0.100619	-0.0869022	0.0915298
0.573333	-0.0278333	0.00932518	-0.0314369	0.0174244		0.573333	0.0895713	-0.101465	-0.0908642	0.0911995
0.576667	-0.0244071	0.00699483	-0.0329465	0.020845		0.576667	0.09049	-0.100929	-0.0846402	0.0921574
0.58	-0.0253398	0.010087	-0.0286548	0.0243545		0.58	0.0906204	-0.099944	-0.0857751	0.0903882
0.583333	-0.0216827	0.0116267	-0.029916	0.0215163		0.583333	0.0894903	-0.0941922	-0.0836545	0.0904995
0.586667	-0.0243986	0.01506	-0.0287713	0.0213519		0.586667	0.0880689	-0.0930789	-0.087156	0.0916602
0.59	-0.0238518	0.00772242	-0.0251158	0.0284003		0.59	0.0884228	-0.0925529	-0.0790505	0.091319
0.593333	-0.0226072	0.00905236	-0.0257274	0.0255785		0.593333	0.0880894	-0.0915374	-0.0803433	0.0904374
0.596667	-0.0218943	0.0101181	-0.0253305	0.0315945		0.596667	0.0868674	-0.0932535	-0.0810578	0.0930978
0.6	-0.0169599	0.0161664	-0.0254806	0.0305137		0.6	0.0865932	-0.0845181	-0.0800223	0.0923889
0.603333	-0.0176818	0.0138832	-0.0236701	0.0298504		0.603333	0.0875123	-0.0859884	-0.0762285	0.0913621
0.606667	-0.0195077	0.0175521	-0.0167582	0.0360092		0.606667	0.0882173	-0.0856821	-0.0774085	0.0908947
0.61	-0.0208533	0.0149363	-0.0175875	0.0382015		0.61	0.0898043	-0.0827524	-0.0741008	0.0918663
0.613333	-0.0195766	0.0254707	-0.0146288	0.0391148		0.613333	0.0911971	-0.0847074	-0.0716028	0.091601
0.616667	-0.0187543	0.0136346	-0.0130479	0.0383607		0.616667	0.0924374	-0.0780753	-0.0676201	0.0930609
0.62	-0.0184875	0.0182085	-0.0153459	0.0429123		0.62	0.0944543	-0.0786914	-0.0706053	0.0939277
0.623333	-0.0174431	0.0229438	-0.0139821	0.0432555		0.623333	0.0962782	-0.076312	-0.0675262	0.0945562
0.626667	-0.0188107	0.0181095	-0.0116801	0.0444081		0.626667	0.096006	-0.0751621	-0.0681051	0.0938048
0.63	-0.0154269	0.0215246	-0.0149727	0.0478916		0.63	0.0962163	-0.0706652	-0.0623872	0.0940637
0.633333	-0.0161263	0.0179964	-0.0093408	0.0490056		0.633333	0.0973409	-0.0705391	-0.0640871	0.0942057
0.636667	-0.0158409	0.0197356	-0.00707802	0.051677		0.636667	0.0981889	-0.0636211	-0.0602565	0.0946051
0.64	-0.0138951	0.0278613	-0.00622173	0.0554417		0.64	0.0968251	-0.0617262	-0.0646805	0.0964472
0.643333	-0.0129044	0.0283143	-0.00038748	0.0549886		0.643333	0.0979176	-0.0647445	-0.0578247	0.0975218
0.646667	-0.0128722	0.0253163	-0.00207224	0.0586891		0.646667	0.0996286	-0.0602441	-0.0550141	0.0974797
0.65	-0.0112601	0.0272722	-0.00105983	0.0571736		0.65	0.098149	-0.056123	-0.0554841	0.0960376
0.653333	-0.00828151	0.0273333	-0.00099664	0.0610172		0.653333	0.0966752	-0.0511589	-0.0471225	0.094252
0.656667	-0.0111504	0.0281689	0.00742614	0.0601104		0.656667	0.098248	-0.0510931	-0.0514253	0.0946742
0.66	-0.0125701	0.0261404	0.00462013	0.0641005		0.66	0.0979733	-0.0455752	-0.0504814	0.0946614
0.663333	-0.00726224	0.0305904	0.00420282	0.0664069		0.663333	0.0973718	-0.0473364	-0.0484131	0.0953183
0.666667	-0.00890489	0.0327808	0.00623935	0.0671946		0.666667	0.0988586	-0.0454783	-0.0438196	0.0968672
0.67	-0.00723931	0.0299025	0.0103116	0.0691411		0.67	0.100514	-0.0385915	-0.0385989	0.0979506
0.673333	-0.00448023	0.0363312	0.00958228	0.0788139		0.673333	0.0998921	-0.037968	-0.0405167	0.095494
0.676667	-0.00445979	0.0342949	0.0127352	0.0790845		0.676667	0.0974828	-0.0336789	-0.036404	0.0945273
0.68	-0.00287518	0.0393411	0.0180502	0.0722602		0.68	0.0972471	-0.0333389	-0.0354637	0.0940506
0.683333	-0.00471955	0.0351841	0.0171756	0.084277		0.683333	0.0972647	-0.0299778	-0.0320357	0.0935934
0.686667	-0.00117889	0.0393031	0.0162419	0.0873364		0.686667	0.0981696	-0.0262506	-0.0307501	0.0945349
0.69	-0.0036678	0.0394641	0.0208625	0.0918394		0.69	0.0992824	-0.0183663	-0.025392	0.0975962
0.693333	0.00088114	0.0366474	0.0205869	0.0904274		0.693333	0.101695	-0.0149837	-0.0246536	0.0983782
0.696667	0.00059644	0.0392231	0.0265214	0.0929217		0.696667	0.101432	-0.0129329	-0.0232372	0.0981891
0.7	-0.00022246	0.0400824	0.0274282	0.0930099		0.7	0.101376	-0.0104058	-0.020218	0.0986826
0.703333	-0.00257311	0.0404839	0.0289348	0.0995669		0.703333	0.100837	-0.00832804	-0.0156053	0.0979079
0.706667	-0.00010533	0.0427831	0.0346659	0.102445		0.706667	0.102513	-0.0042025	-0.0128439	0.0974082
0.71	-0.00010104	0.0407259	0.0350635	0.103895		0.71	0.103144	0.00073506	-0.010923	0.0976101
0.713333	0.00481559	0.0483078	0.0396499	0.106475		0.713333	0.105438	0.0046472	-0.00832296	0.0977172
0.716667	0.00494796	0.0503594	0.0369131	0.113223		0.716667	0.106887	0.00974846	-0.00253196	0.0991626
0.72	0.00201494	0.0513806	0.0360681	0.115083		0.72	0.104558	0.00815054	0.00035991	0.0993351
0.723333	0.00436343	0.0505534	0.0448011	0.116176		0.723333	0.102372	0.0157742	8.569e-05	0.0983348
0.726667	0.0102139	0.0486842	0.0448396	0.119903		0.726667	0.10381	0.0187784	0.00822517	0.0982414
0.73	0.00574035	0.0473431	0.0468507	0.118273		0.73	0.103462	0.0233883	0.0106457	0.0988222
0.733333	0.00474114	0.0528909	0.0525965	0.127511		0.733333	0.103021	0.0267572	0.0104805	0.0970761
0.736667	0.00680052	0.0543691	0.0495815	0.133118		0.736667	0.104757	0.0345932	0.0184519	0.0973507
0.74	0.0149697	0.0551274	0.0590083	0.131461		0.74	0.104508	0.0357647	0.0161488	0.0975416
0.743333	0.00791363	0.0553112	0.0561823	0.132844		0.743333	0.103525	0.0430142	0.0208142	0.0963123
0.746667	0.0117463	0.0586401	0.0555285	0.137233		0.746667	0.104549	0.0430005	0.0236304	0.0954556
0.75	0.00991555	0.0625318	0.0596947	0.138949		0.75	0.105366	0.0484091	0.0360023	0.0952197
0.753333	0.0156043	0.061527	0.065031	0.147604		0.753333	0.105336	0.0584338	0.0300624	0.095623
0.756667	0.0124491	0.0645372	0.0716374	0.149971		0.756667	0.107429	0.0579831	0.0390718	0.0961538
0.76	0.0159542	0.0612064	0.0678756	0.152802		0.76	0.105432	0.0650931	0.0377174	0.0966908
0.763333	0.015947	0.0645526	0.0724251	0.158075		0.763333	0.105758	0.0674008	0.0405097	0.0979143
0.766667	0.0149515	0.0666772	0.0714558	0.158656		0.766667	0.106706	0.0791059	0.0457346	0.100181
0.77	0.0195083	0.0700327	0.0774574	0.16057		0.77	0.107721	0.0819924	0.0514977	0.100956
0.773333	0.0166094	0.0663767	0.0826773	0.173616		0.773333	0.105187	0.0816462	0.0540383	0.101623
0.776667	0.0170187	0.0705943	0.0848482	0.17257		0.776667	0.108075	0.0899554	0.0557446	0.103563
0.78	0.0223409	0.0694296	0.0835242	0.176093		0.78	0.107175	0.0916779	0.0579451	0.102856
0.783333	0.018703	0.0651604	0.0909852	0.181335		0.783333	0.106762	0.0968271	0.0653105	0.100387
0.786667	0.0278663	0.0789886	0.0917066	0.178565		0.786667	0.106397	0.10472	0.0714761	0.098518
0.79	0.019687	0.0720331	0.0946004	0.18796		0.79	0.110268	0.112834	0.0759756	0.0981193
0.793333	0.0168813	0.0732809	0.0989462	0.194709		0.793333	0.111253	0.116404	0.0737873	0.0988353
0.796667	0.0298997	0.0765421	0.0990876	0.198883		0.796667	0.112328	0.122943	0.0841616	0.100032
0.8	0.024013	0.0755777	0.102527	0.199733		0.8	0.11188	0.129356	0.0858485	0.10127
0.803333	0.0248943	0.0792423	0.105134	0.200215		0.803333	0.115039	0.136632	0.0918471	0.102032
0.806667	0.0281877	0.0831715	0.111891	0.208442		0.806667	0.113954	0.145212	0.0974732	0.101918
0.81	0.0266669	0.0802217	0.113671	0.213326		0.81	0.113677	0.148759	0.100988	0.100018
0.813333	0.02438	0.0850917	0.116721	0.215351		0.813333	0.112564	0.152002	0.107956	0.100408
0.816667	0.0269959	0.0862331	0.119062	0.221405		0.816667	0.11507	0.166826	0.111364	0.100922
0.82	0.0354066	0.0840705	0.124616	0.223643		0.82	0.113933	0.169456	0.117675	0.1027
0.823333	0.0317311	0.0838361	0.126489	0.227261		0.823333	0.113372	0.17369	0.11967	0.103727
0.826667	0.0289579	0.0919134	0.129698	0.234064		0.826667	0.114599	0.178298	0.121397	0.104573
0.83	0.0340552	0.0887501	0.130112	0.237681		0.83	0.116678	0.188333	0.135474	0.104354
0.833333	0.0336492	0.0892588	0.134525	0.246814		0.833333	0.115452	0.196171	0.137231	0.103308
0.836667	0.035076	0.0935939	0.136113	0.245291		0.836667	0.115629	0.19865	0.137402	0.103705
0.84	0.0379193	0.099427	0.14039	0.250323		0.84	0.116258	0.206806	0.14596	0.104212
0.843333	0.0381002	0.0993769	0.143894	0.257308		0.843333	0.11498	0.213458	0.151932	0.105166
0.846667	0.0415196	0.0965517	0.15102	0.259612		0.846667	0.115496	0.226232	0.152879	0.106574
0.85	0.0374005	0.106697	0.155555	0.268408		0.85	0.116641	0.227474	0.165259	0.106671
0.853333	0.0361625	0.10013	0.159038	0.26897		0.853333	0.11841	0.235669	0.167066	0.105852
0.856667	0.0435233	0.0980046	0.15875	0.27361		0.856667	0.119185	0.244633	0.176693	0.103897
0.86	0.0429475	0.107194	0.161304	0.27658		0.86	0.118601	0.249836	0.176471	0.104867
0.863333	0.0432376	0.103035	0.167812	0.286822		0.863333	0.119268	0.258473	0.179659	0.103445
0.866667	0.0456975	0.110757	0.173541	0.294577		0.866667	0.118754	0.265587	0.189523	0.105559
0.87	0.0486694	0.106265	0.174819	0.290516		0.87	0.117029	0.268887	0.195657	0.105665
0.873333	0.0495814	0.108327	0.175749	0.300852		0.873333	0.117284	0.28149	0.199428	0.107613
0.876667	0.0542554	0.114955	0.185623	0.305368		0.876667	0.119062	0.289432	0.207206	0.107785
0.88	0.0477168	0.109714	0.186572	0.311289		0.88	0.117891	0.29782	0.212337	0.110065
0.883333	0.0542432	0.110632	0.187832	0.315885		0.883333	0.117896	0.300621	0.216636	0.110504
0.886667	0.0522451	0.113601	0.194184	0.3184		0.886667	0.119165	0.312604	0.223147	0.111413
0.89	0.0485775	0.117837	0.198869	0.328309		0.89	0.120408	0.319235	0.233715	0.111829
0.893333	0.0616261	0.114186	0.205951	0.33256		0.893333	0.119778	0.325964	0.236984	0.111236
0.896667	0.0543317	0.119828	0.209173	0.338403		0.896667	0.121291	0.337416	0.243159	0.109497
0.9	0.0524108	0.119783	0.209266	0.34545		0.9	0.121542	0.343432	0.244064	0.111521
0.903333	0.059859	0.125141	0.210032	0.352585		0.903333	0.121438	0.356539	0.253433	0.111481
0.906667	0.0603256	0.121762	0.214884	0.352579		0.906667	0.119482	0.362429	0.261148	0.113469
0.91	0.0640422	0.124043	0.224731	0.35948		0.91	0.12117	0.367238	0.269068	0.112817
0.913333	0.0651054	0.126662	0.227829	0.364934		0.913333	0.121062	0.378145	0.273081	0.112856
0.916667	0.0643888	0.125237	0.230728	0.369514		0.916667	0.124091	0.390311	0.282947	0.109576
0.92	0.062085	0.132519	0.232456	0.375186		0.92	0.124995	0.394538	0.291168	0.111578
0.923333	0.0649359	0.132973	0.236144	0.381396		0.923333	0.128668	0.407525	0.298466	0.111577
0.926667	0.0699071	0.130528	0.240714	0.390133		0.926667	0.128679	0.411204	0.303862	0.112919
0.93	0.0664782	0.135968	0.247183	0.392065		0.93	0.130267	0.423201	0.30678	0.114469
0.933333	0.0715986	0.141856	0.253934	0.402578		0.933333	0.129527	0.431858	0.31326	0.117172
0.936667	0.0727745	0.1351	0.255226	0.408773		0.936667	0.1313	0.441962	0.323002	0.114407
0.94	0.0736427	0.142019	0.261502	0.417309		0.94	0.130757	0.454778	0.329963	0.114866
0.943333	0.0734023	0.144665	0.263168	0.419009		0.943333	0.132726	0.464821	0.33177	0.11484
0.946667	0.0794823	0.143274	0.271714	0.430428		0.946667	0.130552	0.4706	0.338013	0.11695
0.95	0.0788957	0.143252	0.270222	0.432574		0.95	0.131257	0.479241	0.347923	0.117433
0.953333	0.0794804	0.146459	0.279346	0.437296		0.953333	0.130781	0.492741	0.355292	0.120466
0.956667	0.0771819	0.146889	0.284124	0.447107		0.956667	0.130121	0.499641	0.361217	0.118881
0.96	0.0805552	0.156618	0.285008	0.454039		0.96	0.128445	0.507847	0.372067	0.118799
0.963333	0.080667	0.151849	0.293571	0.458235		0.963333	0.130936	0.516283	0.374922	0.117606
0.966667	0.0801277	0.155574	0.294165	0.463666		0.966667	0.130482	0.527104	0.385811	0.118614
0.97	0.0864995	0.156922	0.300642	0.47263		0.97	0.132216	0.538499	0.39116	0.118264
0.973333	0.0830459	0.160893	0.303791	0.47619		0.973333	0.134081	0.543943	0.398879	0.119073
0.976667	0.0886506	0.161668	0.313132	0.488449		0.976667	0.13701	0.556886	0.407576	0.12139
0.98	0.0853105	0.163669	0.31622	0.488752		0.98	0.136815	0.56141	0.413618	0.12177
0.983333	0.0915471	0.16703	0.31635	0.50008		0.983333	0.138496	0.578463	0.428586	0.121263
0.986667	0.0890186	0.166294	0.326227	0.505256		0.986667	0.139293	0.588376	0.427467	0.120339
0.99	0.0964649	0.169954	0.334799	0.514899		0.99	0.139101	0.600765	0.436186	0.121673
0.993333	0.0915479	0.17177	0.334706	0.520832		0.993333	0.136651	0.608613	0.444998	0.121931
0.996667	0.0921678	0.172132	0.339408	0.526865		0.996667	0.136264	0.622699	0.457629	0.121136
1	0.095681	0.17372	0.343309	0.537957		1	0.136057	0.631653	0.463882	0.121207
1.00333	0.0972115	0.17492	0.352641	0.541069		1.00333	0.13568	0.639063	0.469561	0.122496
1.00667	0.104985	0.185973	0.354339	0.54671		1.00667	0.138318	0.651155	0.474044	0.122559
1.01	0.106875	0.185413	0.358184	0.556199		1.01	0.139528	0.662259	0.486827	0.122043
1.01333	0.101618	0.182772	0.368445	0.563524		1.01333	0.141021	0.674893	0.497906	0.123395
1.01667	0.105237	0.181977	0.368371	0.569959		1.01667	0.140636	0.683984	0.502734	0.122189
1.02	0.104967	0.18878	0.372942	0.576869		1.02	0.13975	0.694459	0.511169	0.123496
1.02333	0.10745	0.191989	0.379229	0.587014		1.02333	0.138423	0.705484	0.520175	0.123367
1.02667	0.111614	0.190882	0.387624	0.593812		1.02667	0.139286	0.71657	0.527119	0.124894
1.03	0.112872	0.195626	0.391149	0.60185		1.03	0.139465	0.733246	0.536486	0.124844
1.03333	0.116182	0.191821	0.398071	0.608222		1.03333	0.139618	0.740888	0.546006	0.1268
1.03667	0.117346	0.200716	0.411019	0.618163		1.03667	0.141406	0.75374	0.553343	0.126066
1.04	0.115121	0.201088	0.405754	0.622496		1.04	0.140302	0.765572	0.560618	0.128121
1.04333	0.115808	0.202508	0.410903	0.626348		1.04333	0.141437	0.771175	0.571791	0.129285
1.04667	0.119821	0.203669	0.41965	0.636013		1.04667	0.142289	0.786501	0.578556	0.130214
1.05	0.118143	0.206946	0.423677	0.643662		1.05	0.145046	0.796136	0.588847	0.129634
1.05333	0.121387	0.207677	0.427821	0.655355		1.05333	0.145943	0.807583	0.595674	0.130261
1.05667	0.122849	0.212806	0.441376	0.660084		1.05667	0.148869	0.821293	0.603334	0.127769
1.06	0.129435	0.215466	0.445932	0.666804		1.06	0.147715	0.831704	0.612626	0.127365
1.06333	0.131841	0.216897	0.446306	0.67362		1.06333	0.148974	0.847798	0.626331	0.128746
1.06667	0.126479	0.218194	0.456654	0.681042		1.06667	0.147493	0.856464	0.635684	0.129658
1.07	0.132124	0.217719	0.458078	0.693762		1.07	0.148015	0.867543	0.640872	0.130638
1.07333	0.131529	0.219329	0.467067	0.700035		1.07333	0.148514	0.879592	0.647184	0.132568
1.07667	0.135279	0.226228	0.47115	0.71064		1.07667	0.150172	0.890082	0.65659	0.132512
1.08	0.140339	0.229032	0.474616	0.716529		1.08	0.149057	0.902133	0.667814	0.13266
1.08333	0.137536	0.230687	0.479468	0.726003		1.08333	0.151107	0.919095	0.678426	0.133638
1.08667	0.137939	0.226273	0.486664	0.733809		1.08667	0.150254	0.92757	0.689102	0.133045
1.09	0.141053	0.23174	0.493737	0.745265		1.09	0.150038	0.938748	0.697888	0.135123
1.09333	0.145692	0.235814	0.499104	0.752833		1.09333	0.151648	0.945839	0.70212	0.136669
1.09667	0.147672	0.238249	0.506515	0.755069		1.09667	0.15416	0.965104	0.714178	0.138296
1.1	0.146823	0.235753	0.510898	0.766607		1.1	0.154186	0.974395	0.7216	0.138831
1.10333	0.14807	0.24432	0.517928	0.776273		1.10333	0.156239	0.986767	0.736789	0.142546
1.10667	0.147285	0.241122	0.52642	0.785116		1.10667	0.156562	1.00357	0.74296	0.139641
1.11	0.152985	0.24206	0.529134	0.792786		1.11	0.158006	1.01456	0.753036	0.139411
1.11333	0.152688	0.249067	0.535011	0.799655		1.11333	0.157875	1.02398	0.759494	0.139501
1.11667	0.156823	0.250802	0.543649	0.812207		1.11667	0.157614	1.04351	0.773649	0.141299
1.12	0.157879	0.254022	0.54742	0.820252		1.12	0.156486	1.05323	0.781805	0.140147
1.12333	0.160887	0.256906	0.556601	0.825271		1.12333	0.157986	1.06819	0.788959	0.143134
1.12667	0.163064	0.259945	0.561091	0.835683		1.12667	0.15707	1.08109	0.802115	0.143452
1.13	0.161797	0.265523	0.565921	0.844903		1.13	0.158427	1.09436	0.808273	0.143182
1.13333	0.164314	0.26083	0.572684	0.856636		1.13333	0.160995	1.10582	0.821394	0.14457
1.13667	0.168944	0.268406	0.578343	0.86286		1.13667	0.163138	1.11706	0.831052	0.144646
1.14	0.170036	0.266649	0.582421	0.869547		1.14	0.163497	1.13039	0.842381	0.145178
1.14333	0.173501	0.270243	0.590363	0.875729		1.14333	0.163685	1.14701	0.853427	0.146581
1.14667	0.170615	0.270378	0.595234	0.886413		1.14667	0.164384	1.15901	0.859163	0.148635
1.15	0.174006	0.276735	0.603658	0.897025		1.15	0.164413	1.17457	0.874295	0.147921
1.15333	0.180393	0.277812	0.609153	0.907556		1.15333	0.16455	1.18711	0.880029	0.149647
1.15667	0.175833	0.279169	0.618244	0.915727		1.15667	0.163914	1.19496	0.886776	0.148812
1.16	0.181141	0.285921	0.62284	0.925993		1.16	0.165008	1.21513	0.899878	0.14954
1.16333	0.182625	0.283977	0.628492	0.935051		1.16333	0.164285	1.22239	0.912242	0.149509
1.16667	0.185882	0.287808	0.639136	0.947151		1.16667	0.164599	1.23776	0.924089	0.152328
1.17	0.192308	0.292329	0.64245	0.952451		1.17	0.165499	1.2505	0.934314	0.152171
1.17333	0.189192	0.293659	0.655754	0.961292		1.17333	0.166897	1.26296	0.943814	0.152841
1.17667	0.18794	0.295357	0.661401	0.969154		1.17667	0.167675	1.27694	0.955345	0.153127
1.18	0.188142	0.301575	0.666329	0.977797		1.18	0.167966	1.29327	0.963534	0.152418
1.18333	0.19611	0.294457	0.66891	0.993174		1.18333	0.168266	1.31091	0.974111	0.152604
1.18667	0.19784	0.306009	0.682055	1.00076		1.18667	0.168382	1.32367	0.987674	0.154353
1.19	0.200117	0.305342	0.680109	1.01099		1.19	0.168817	1.334	0.995075	0.156494
1.19333	0.19764	0.309052	0.689419	1.02095		1.19333	0.170752	1.34738	1.01112	0.156186
1.19667	0.202758	0.314773	0.695692	1.03172		1.19667	0.173624	1.36132	1.01634	0.156466
1.2	0.203348	0.312666	0.705062	1.0396		1.2	0.176442	1.37539	1.02837	0.157308
1.20333	0.20585	0.316389	0.709812	1.05178		1.20333	0.177583	1.3915	1.04265	0.15755
1.20667	0.206324	0.324059	0.713764	1.06005		1.20667	0.178917	1.40394	1.05132	0.159364
1.21	0.215957	0.326142	0.718812	1.06617		1.21	0.179694	1.41497	1.06837	0.15999
1.21333	0.215367	0.327175	0.734006	1.07716		1.21333	0.181045	1.43221	1.07263	0.163813
1.21667	0.220425	0.331326	0.735717	1.08814		1.21667	0.180578	1.44894	1.07996	0.164076
1.22	0.217814	0.330701	0.743746	1.09489		1.22	0.181084	1.45812	1.09364	0.164077
1.22333	0.220137	0.332193	0.746645	1.10538		1.22333	0.183384	1.47405	1.10367	0.165026
1.22667	0.226255	0.333115	0.760088	1.11996		1.22667	0.184303	1.48626	1.11612	0.167425
1.23	0.221014	0.337872	0.76387	1.12569		1.23	0.185691	1.50284	1.1254	0.166358
1.23333	0.227338	0.340865	0.775686	1.13298		1.23333	0.185137	1.51623	1.13732	0.166522
1.23667	0.228568	0.341991	0.779445	1.14732		1.23667	0.184837	1.52816	1.14888	0.167317
1.24	0.237149	0.347752	0.787518	1.15727		1.24	0.184672	1.54469	1.16181	0.167462
1.24333	0.233039	0.345867	0.794399	1.16894		1.24333	0.185485	1.56119	1.17243	0.168327
1.24667	0.235602	0.353162	0.804174	1.17763		1.24667	0.184574	1.57512	1.18222	0.170534
1.25	0.236874	0.35919	0.809539	1.18454		1.25	0.189039	1.5912	1.19588	0.170277
1.25333	0.240366	0.362208	0.816617	1.19837		1.25333	0.192308	1.60234	1.20178	0.171551
1.25667	0.242348	0.354947	0.819453	1.2098		1.25667	0.19481	1.62462	1.2166	0.172171
1.26	0.245911	0.364693	0.829928	1.21806		1.26	0.195836	1.63935	1.2305	0.173539
1.26333	0.244785	0.367709	0.839468	1.22878		1.26333	0.197086	1.64834	1.23733	0.172115
1.26667	0.245883	0.373479	0.84533	1.23547		1.26667	0.196857	1.66284	1.24769	0.173133
1.27	0.259138	0.375239	0.853116	1.24767		1.27	0.19666	1.68202	1.26128	0.174533
1.27333	0.255079	0.374429	0.861112	1.26047		1.27333	0.19682	1.69461	1.27842	0.176485
1.27667	0.253165	0.381043	0.870575	1.26694		1.27667	0.196964	1.70815	1.28708	0.176397
1.28	0.263825	0.387928	0.873843	1.27889		1.28	0.199057	1.7264	1.29573	0.17784
1.28333	0.260271	0.386412	0.881817	1.28785		1.28333	0.201216	1.73615	1.30931	0.179902
1.28667	0.262403	0.38643	0.888733	1.29859		1.28667	0.203669	1.75293	1.32055	0.180861
1.29	0.266849	0.395617	0.897725	1.31107		1.29	0.204136	1.76782	1.32853	0.180478
1.29333	0.272017	0.396439	0.908023	1.3193		1.29333	0.20615	1.78422	1.3429	0.182051
1.29667	0.269785	0.400023	0.913136	1.33277		1.29667	0.205612	1.8019	1.35775	0.184056
1.3	0.278879	0.398689	0.924427	1.34071		1.3	0.204742	1.81471	1.36576	0.184858
1.30333	0.277889	0.406568	0.928256	1.35313		1.30333	0.204531	1.82425	1.38026	0.185431
1.30667	0.282109	0.405562	0.941191	1.36502		1.30667	0.206699	1.84615	1.38668	0.185999
1.31	0.282768	0.410416	0.946996	1.3768		1.31	0.207338	1.85829	1.39635	0.185375
1.31333	0.286817	0.415048	0.949804	1.38659		1.31333	0.208851	1.87662	1.41598	0.185782
1.31667	0.279434	0.41338	0.95551	1.3976		1.31667	0.210607	1.88941	1.43049	0.185914
1.32	0.290703	0.42068	0.965175	1.40299		1.32	0.211201	1.90402	1.43985	0.18847
1.32333	0.289129	0.423155	0.96945	1.41321		1.32333	0.211449	1.9178	1.45043	0.19022
1.32667	0.291585	0.423979	0.980356	1.43354		1.32667	0.213009	1.93413	1.46353	0.190883
1.33	0.293175	0.426184	0.986303	1.43847		1.33	0.214935	1.95327	1.47569	0.191243
1.33333	0.297693	0.431804	0.99845	1.45036		1.33333	0.215798	1.96433	1.48492	0.192864
1.33667	0.300726	0.433531	1.00255	1.45734		1.33667	0.219403	1.98017	1.50226	0.193743
1.34	0.305303	0.43633	1.01724	1.46869		1.34	0.21843	1.99361	1.51561	0.193813
1.34333	0.310554	0.444267	1.01543	1.48536		1.34333	0.218067	2.01214	1.52211	0.195092
1.34667	0.307736	0.442991	1.02344	1.49343		1.34667	0.218805	2.02801	1.53898	0.197897
1.35	0.31205	0.447215	1.03576	1.50166		1.35	0.221641	2.03929	1.54792	0.198838
1.35333	0.312738	0.450579	1.04718	1.51402		1.35333	0.22147	2.05719	1.55647	0.196507
1.35667	0.314736	0.45161	1.0501	1.5218		1.35667	0.22593	2.06912	1.57165	0.19873
1.36	0.320421	0.457637	1.05745	1.53617		1.36	0.228034	2.08704	1.58825	0.200173
1.36333	0.321111	0.456292	1.06679	1.54889		1.36333	0.228915	2.10301	1.59859	0.200217
1.36667	0.324951	0.463705	1.07504	1.56071		1.36667	0.228195	2.1176	1.60491	0.200786
1.37	0.325794	0.463832	1.08461	1.56672		1.37	0.231236	2.13602	1.62181	0.202424
1.37333	0.329462	0.468053	1.08682	1.58389		1.37333	0.231155	2.15031	1.63744	0.203041
1.37667	0.331129	0.469396	1.10459	1.5928		1.37667	0.232561	2.1641	1.64291	0.202829
1.38	0.334586	0.474604	1.10463	1.60176		1.38	0.232759	2.18195	1.65936	0.202132
1.38333	0.336976	0.479262	1.11332	1.61258		1.38333	0.236002	2.193	1.66675	0.204341
1.38667	0.344101	0.48219	1.12489	1.6272		1.38667	0.236505	2.21555	1.68599	0.205681
1.39	0.345234	0.482605	1.12962	1.64011		1.39	0.237197	2.22716	1.69455	0.206253
1.39333	0.346847	0.484214	1.14427	1.64626		1.39333	0.238179	2.24438	1.70852	0.209457
1.39667	0.352899	0.490176	1.14781	1.65855		1.39667	0.242028	2.25878	1.7184	0.210511
1.4	0.355834	0.495229	1.15318	1.66826		1.4	0.242074	2.27347	1.7297	0.210504
1.40333	0.354652	0.501654	1.16565	1.67934		1.40333	0.242394	2.28697	1.74725	0.211165
1.40667	0.362797	0.500536	1.17174	1.69409		1.40667	0.244384	2.30659	1.75941	0.212527
1.41	0.360214	0.504954	1.18148	1.70246		1.41	0.244787	2.3189	1.77173	0.213034
1.41333	0.367264	0.508255	1.18597	1.71653		1.41333	0.243618	2.33212	1.78127	0.216447
1.41667	0.36782	0.509656	1.20041	1.72495		1.41667	0.246765	2.35118	1.79512	0.218891
1.42	0.368735	0.511899	1.20291	1.73908		1.42	0.249079	2.36491	1.81287	0.219763
1.42333	0.370144	0.520905	1.20711	1.75309		1.42333	0.250307	2.38024	1.816	0.219948
1.42667	0.376926	0.522453	1.21963	1.76145		1.42667	0.251974	2.39513	1.8338	0.221571
1.43	0.375329	0.520062	1.23071	1.77435		1.43	0.253959	2.4123	1.84355	0.222576
1.43333	0.383599	0.528028	1.23612	1.7885		1.43333	0.253117	2.42685	1.85622	0.223341
1.43667	0.380406	0.533819	1.24462	1.7983		1.43667	0.252123	2.44518	1.87382	0.226472
1.44	0.39139	0.533581	1.25642	1.80784		1.44	0.251917	2.4606	1.88722	0.227052
1.44333	0.3856	0.539282	1.2638	1.81609		1.44333	0.252974	2.47442	1.89424	0.226721
1.44667	0.391414	0.5421	1.27441	1.83413		1.44667	0.254269	2.48496	1.90784	0.225652
1.45	0.389028	0.540235	1.28081	1.84291		1.45	0.25545	2.51367	1.92265	0.227144
1.45333	0.395528	0.546228	1.28985	1.85911		1.45333	0.257676	2.52358	1.9367	0.228116
1.45667	0.402052	0.554501	1.29386	1.86381		1.45667	0.261541	2.54087	1.94366	0.227758
1.46	0.399209	0.555839	1.3012	1.87621		1.46	0.261736	2.55489	1.96053	0.229723
1.46333	0.406576	0.558465	1.31369	1.886		1.46333	0.262186	2.57663	1.97173	0.2317
1.46667	0.410024	0.558795	1.32458	1.89788		1.46667	0.263562	2.58428	1.97891	0.233357
1.47	0.411903	0.563215	1.33237	1.91583		1.47	0.265609	2.60218	1.99476	0.232811
1.47333	0.414838	0.568093	1.33524	1.92285		1.47333	0.264329	2.61696	2.01186	0.236214
1.47667	0.420568	0.57028	1.34526	1.93384		1.47667	0.267146	2.64085	2.02168	0.235941
1.48	0.420001	0.578987	1.35578	1.94599		1.48	0.26955	2.65061	2.03885	0.238916
1.48333	0.424516	0.581002	1.36372	1.95765		1.48333	0.271402	2.6655	2.0457	0.238205
1.48667	0.424593	0.578996	1.3745	1.96599		1.48667	0.271787	2.68285	2.05817	0.241363
1.49	0.425343	0.585478	1.38141	1.97811		1.49	0.272444	2.70087	2.07314	0.241914
1.49333	0.432825	0.59082	1.38853	1.99569		1.49333	0.272734	2.71247	2.08821	0.245731
1.49667	0.43366	0.592128	1.39999	2.00489		1.49667	0.273661	2.72728	2.09941	0.244136
1.5	0.434077	0.595216	1.40919	2.01689		1.5	0.27481	2.74284	2.11508	0.245451
1.50333	0.441093	0.604775	1.41654	2.02967		1.50333	0.276859	2.76292	2.12183	0.246848
1.50667	0.440495	0.602295	1.42218	2.03824		1.50667	0.280134	2.7778	2.13683	0.249055
1.51	0.449071	0.604625	1.43223	2.05351		1.51	0.2835	2.79323	2.1448	0.24776
1.51333	0.450028	0.615503	1.43922	2.0658		1.51333	0.286029	2.80798	2.1644	0.249155
1.51667	0.450206	0.614979	1.44867	2.0744		1.51667	0.28764	2.82206	2.17719	0.249672
1.52	0.456912	0.621386	1.45901	2.09023		1.52	0.287929	2.83775	2.19089	0.249884
1.52333	0.461377	0.621344	1.46371	2.10277		1.52333	0.289456	2.85247	2.19808	0.250969
1.52667	0.463388	0.620717	1.47458	2.11056		1.52667	0.289622	2.86768	2.2158	0.252737
1.53	0.464992	0.629703	1.4812	2.12339		1.53	0.290693	2.88507	2.22524	0.254689
1.53333	0.470643	0.6294	1.49253	2.13221		1.53333	0.292124	2.90104	2.23912	0.256297
1.53667	0.474018	0.639798	1.50388	2.14789		1.53667	0.293762	2.91606	2.25652	0.257463
1.54	0.475935	0.638515	1.50934	2.1632		1.54	0.293826	2.93366	2.26547	0.257994
1.54333	0.480849	0.645123	1.52434	2.16768		1.54333	0.296684	2.94779	2.27582	0.259803
1.54667	0.479101	0.649314	1.52848	2.18536		1.54667	0.298032	2.96578	2.28796	0.26171
1.55	0.485588	0.645917	1.5386	2.1952		1.55	0.300072	2.98078	2.30299	0.262639
1.55333	0.490056	0.6552	1.54447	2.20596		1.55333	0.301409	2.99258	2.31712	0.263358
1.55667	0.494763	0.661816	1.55333	2.22038		1.55667	0.303812	3.01312	2.32827	0.263481
1.56	0.493257	0.659911	1.5634	2.22631		1.56	0.303066	3.02546	2.34268	0.264765
1.56333	0.499437	0.663123	1.57271	2.24679		1.56333	0.303518	3.03813	2.36261	0.265076
1.56667	0.500374	0.671533	1.57889	2.25444		1.56667	0.306706	3.05915	2.36906	0.269373
1.57	0.507639	0.677785	1.58679	2.26588		1.57	0.30846	3.07273	2.37964	0.270804
1.57333	0.51091	0.675062	1.59961	2.27271		1.57333	0.309529	3.08951	2.39596	0.272603
1.57667	0.511286	0.678137	1.60973	2.28534		1.57667	0.311743	3.10195	2.40637	0.273763
1.58	0.512585	0.681241	1.61456	2.29572		1.58	0.315453	3.1149	2.41992	0.276246
1.58333	0.517758	0.692434	1.62194	2.30907		1.58333	0.315335	3.13655	2.43538	0.275862
1.58667	0.521317	0.69199	1.6388	2.32241		1.58667	0.31894	3.15167	2.44303	0.278184
1.59	0.521966	0.694662	1.63611	2.33553		1.59	0.320702	3.1666	2.45909	0.280026
1.59333	0.527929	0.698031	1.65464	2.34839		1.59333	0.323358	3.1872	2.4722	0.281148
1.59667	0.532696	0.70624	1.65872	2.35828		1.59667	0.322564	3.19867	2.48844	0.281011
1.6	0.535207	0.705223	1.66612	2.37667		1.6	0.325987	3.21369	2.4966	0.283301
1.60333	0.535419	0.708864	1.67877	2.3874		1.60333	0.326908	3.22939	2.50932	0.28329
1.60667	0.537912	0.71634	1.68408	2.39486		1.60667	0.326777	3.24778	2.52498	0.284923
1.61	0.54199	0.720313	1.69275	2.40695		1.61	0.327363	3.2529	2.53755	0.286174
1.61333	0.551121	0.724059	1.70758	2.41779		1.61333	0.328569	3.27852	2.54787	0.287845
1.61667	0.552831	0.724787	1.71482	2.4319		1.61667	0.326192	3.28568	2.56166	0.289324
1.62	0.552235	0.731516	1.72134	2.44482		1.62	0.326286	3.30854	2.57593	0.290211
1.62333	0.555932	0.735826	1.73261	2.45192		1.62333	0.330123	3.32321	2.58537	0.291769
1.62667	0.560905	0.738446	1.73938	2.46555		1.62667	0.331982	3.33797	2.60761	0.293141
1.63	0.566825	0.740148	1.7473	2.48157		1.63	0.335105	3.35302	2.61573	0.295469
1.63333	0.566168	0.743808	1.75789	2.49075		1.63333	0.339045	3.37294	2.62657	0.296927
1.63667	0.570461	0.750321	1.77027	2.50505		1.63667	0.338666	3.38114	2.6378	0.299208
1.64	0.573826	0.754925	1.779	2.51572		1.64	0.34034	3.39739	2.65143	0.300318
1.64333	0.574507	0.756294	1.78413	2.52572		1.64333	0.340798	3.41797	2.66542	0.300686
1.64667	0.585571	0.755657	1.79548	2.53915		1.64667	0.342625	3.42784	2.67489	0.30092
1.65	0.581645	0.767231	1.80024	2.5536		1.65	0.344689	3.4411	2.69427	0.302676
1.65333	0.586304	0.766117	1.81208	2.56221		1.65333	0.350915	3.45641	2.7008	0.304613
1.65667	0.592638	0.774945	1.82249	2.5779		1.65667	0.353573	3.48108	2.71577	0.305936
1.66	0.596551	0.778122	1.83405	2.58634		1.66	0.357065	3.48467	2.72817	0.307907
1.66333	0.597246	0.781259	1.8419	2.59968		1.66333	0.359458	3.50845	2.74291	0.310359
1.66667	0.602752	0.785014	1.8515	2.61006		1.66667	0.360382	3.51784	2.75735	0.310641
1.67	0.607409	0.786777	1.85493	2.62323		1.67	0.360572	3.53651	2.76813	0.311362
1.67333	0.609912	0.791365	1.86615	2.6388		1.67333	0.362194	3.54957	2.78193	0.31307
1.67667	0.61189	0.796733	1.87497	2.64895		1.67667	0.363519	3.56404	2.7932	0.315402
1.68	0.616346	0.803307	1.88052	2.65862		1.68	0.365543	3.5805	2.80236	0.317045
1.68333	0.620124	0.804769	1.89735	2.6708		1.68333	0.369941	3.59679	2.81737	0.319634
1.68667	0.623438	0.805544	1.90534	2.68385		1.68667	0.370013	3.61109	2.83139	0.319955
1.69	0.626079	0.810827	1.90698	2.6951		1.69	0.371611	3.62408	2.8486	0.321903
1.69333	0.633087	0.818815	1.92173	2.7091		1.69333	0.373688	3.64215	2.85809	0.322603
1.69667	0.629898	0.82133	1.92957	2.7176		1.69667	0.375645	3.66003	2.86981	0.322556
1.7	0.637158	0.820176	1.94117	2.73156		1.7	0.375083	3.67332	2.88376	0.323452
1.70333	0.640711	0.823108	1.94916	2.7416		1.70333	0.377004	3.68998	2.89939	0.32581
1.70667	0.64962	0.827373	1.95806	2.75841		1.70667	0.376927	3.70387	2.90958	0.325574
1.71	0.646763	0.835664	1.96513	2.76469		1.71	0.379165	3.71418	2.92139	0.327727
1.71333	0.654876	0.840283	1.96972	2.77846		1.71333	0.380506	3.73089	2.93612	0.331589
1.71667	0.655298	0.843282	1.98185	2.79399		1.71667	0.382998	3.74613	2.9452	0.33255
1.72	0.659831	0.848869	1.99315	2.80405		1.72	0.385017	3.76385	2.95661	0.334759
1.72333	0.666018	0.856064	2.00508	2.81561		1.72333	0.388582	3.7724	2.9738	0.335575
1.72667	0.666216	0.856845	2.01366	2.82635		1.72667	0.388104	3.78818	2.98843	0.336708
1.73	0.670058	0.860305	2.01968	2.84122		1.73	0.391002	3.80262	2.99553	0.336658
1.73333	0.674992	0.862937	2.03064	2.85157		1.73333	0.3935	3.81625	3.007	0.34005
1.73667	0.681479	0.872489	2.04009	2.86029		1.73667	0.396398	3.82894	3.02008	0.341897
1.74	0.682677	0.872967	2.04975	2.87182		1.74	0.398497	3.84665	3.03504	0.346593
1.74333	0.683455	0.873147	2.05416	2.88742		1.74333	0.401403	3.86405	3.05181	0.348046
1.74667	0.688871	0.880018	2.07146	2.89229		1.74667	0.402613	3.88055	3.06211	0.350097
1.75	0.691924	0.88562	2.07345	2.90859		1.75	0.404828	3.89246	3.07542	0.351424
1.75333	0.698124	0.890927	2.0835	2.92358		1.75333	0.407069	3.90648	3.08623	0.351951
1.75667	0.702272	0.892499	2.09503	2.9314		1.75667	0.408702	3.91532	3.09952	0.352447
1.76	0.702773	0.897663	2.09599	2.94305		1.76	0.411009	3.93638	3.11104	0.353728
1.76333	0.708693	0.907503	2.11071	2.96195		1.76333	0.413433	3.95157	3.12204	0.353083
1.76667	0.709481	0.902422	2.12304	2.96692		1.76667	0.415231	3.96111	3.14148	0.355822
1.77	0.715761	0.909151	2.13796	2.97922		1.77	0.418226	3.98044	3.14407	0.359192
1.77333	0.724209	0.915058	2.14017	2.99483		1.77333	0.419505	3.99054	3.15882	0.361511
1.77667	0.726657	0.918836	2.14493	3.0028		1.77667	0.422402	4.00511	3.17359	0.363134
1.78	0.725713	0.920223	2.159	3.01459		1.78	0.422237	4.02089	3.18594	0.367314
1.78333	0.732007	0.922127	2.16694	3.03149		1.78333	0.423529	4.03373	3.19917	0.367123
1.78667	0.732209	0.93188	2.17714	3.03452		1.78667	0.424016	4.04941	3.21107	0.367193
1.79	0.736773	0.931238	2.18384	3.0501		1.79	0.426872	4.06339	3.22472	0.367062
1.79333	0.74644	0.938505	2.19941	3.0637		1.79333	0.428899	4.0738	3.23537	0.369697
1.79667	0.748258	0.943201	2.19935	3.07094		1.79667	0.432431	4.09	3.25517	0.37165
1.8	0.750457	0.946109	2.2151	3.0864		1.8	0.434626	4.10557	3.26363	0.373134
1.80333	0.749236	0.947819	2.22412	3.09869		1.80333	0.438245	4.11413	3.27565	0.375136
1.80667	0.758403	0.961574	2.22985	3.11207		1.80667	0.440773	4.13192	3.28094	0.376176
1.81	0.761629	0.963691	2.24137	3.12187		1.81	0.441627	4.1476	3.2946	0.377107
1.81333	0.764879	0.962409	2.2484	3.12947		1.81333	0.443419	4.15691	3.30799	0.377075
1.81667	0.774966	0.970385	2.25451	3.14714		1.81667	0.445003	4.17295	3.32599	0.380916
1.82	0.76954	0.971315	2.26547	3.15288		1.82	0.446861	4.18839	3.33832	0.383557
1.82333	0.779339	0.980314	2.27983	3.16555		1.82333	0.447644	4.20345	3.34524	0.385243
1.82667	0.779053	0.986986	2.28556	3.1839		1.82667	0.448598	4.2177	3.36122	0.387882
1.83	0.785634	0.98869	2.2935	3.1899		1.83	0.451687	4.22447	3.37197	0.389678
1.83333	0.791898	0.987997	2.3101	3.20234		1.83333	0.455563	4.23965	3.38084	0.392083
1.83667	0.794683	0.992275	2.31195	3.21851		1.83667	0.45634	4.25757	3.39439	0.392736
1.84	0.795535	0.998612	2.32269	3.23022		1.84	0.459073	4.2705	3.40549	0.396551
1.84333	0.802886	1.00037	2.32822	3.24068		1.84333	0.461829	4.28437	3.42211	0.396584
1.84667	0.804799	1.00672	2.3415	3.24708		1.84667	0.464893	4.29846	3.43485	0.399351
1.85	0.810977	1.00502	2.34958	3.25399		1.85	0.465691	4.31201	3.4459	0.400409
1.85333	0.812395	1.01024	2.36735	3.27298		1.85333	0.468656	4.32786	3.45487	0.40334
1.85667	0.817995	1.02294	2.36912	3.28065		1.85667	0.469503	4.33516	3.46191	0.404564
1.86	0.818335	1.02644	2.37996	3.29416		1.86	0.470736	4.34835	3.47831	0.407663
1.86333	0.82329	1.02475	2.39149	3.30838		1.86333	0.47119	4.36389	3.48935	0.408703
1.86667	0.826594	1.02771	2.39096	3.30986		1.86667	0.471809	4.37615	3.50269	0.41149
1.87	0.827302	1.03884	2.40135	3.32807		1.87	0.472141	4.39394	3.51753	0.412035
1.87333	0.836752	1.03601	2.40969	3.33819		1.87333	0.474846	4.40472	3.52654	0.413976
1.87667	0.84226	1.04882	2.42424	3.35031		1.87667	0.478603	4.42041	3.54011	0.414438
1.88	0.844149	1.05014	2.42932	3.36525		1.88	0.482124	4.42657	3.55061	0.41842
1.88333	0.850117	1.0553	2.44123	3.37346		1.88333	0.48408	4.44477	3.56231	0.418821
1.88667	0.848816	1.06071	2.45182	3.38332		1.88667	0.48793	4.4487	3.57778	0.420524
1.89	0.852877	1.06068	2.45716	3.40214		1.89	0.489938	4.46905	3.58439	0.42387
1.89333	0.858553	1.0661	2.46665	3.40878		1.89333	0.491715	4.48474	3.5987	0.42566
1.89667	0.867746	1.07076	2.47795	3.41824		1.89667	0.490785	4.49911	3.6074	0.426049
1.9	0.865078	1.07226	2.48617	3.43552		1.9	0.493973	4.50665	3.62637	0.42808
1.90333	0.870892	1.08225	2.50015	3.4395		1.90333	0.494942	4.52136	3.63403	0.429794
1.90667	0.875338	1.07869	2.50495	3.45125		1.90667	0.497544	4.53523	3.64784	0.43071
1.91	0.879071	1.09394	2.5155	3.46731		1.91	0.499949	4.54644	3.66112	0.433789
1.91333	0.882741	1.09389	2.51645	3.47541		1.91333	0.505116	4.56101	3.66778	0.43633
1.91667	0.88694	1.09464	2.53248	3.48259		1.91667	0.506759	4.57273	3.68304	0.437245
1.92	0.895188	1.10009	2.54345	3.49679		1.92	0.508009	4.58624	3.69545	0.440633
1.92333	0.900946	1.10583	2.54316	3.51022		1.92333	0.509197	4.59934	3.70615	0.439834
1.92667	0.899872	1.11106	2.55614	3.52273		1.92667	0.511075	4.61215	3.71316	0.442767
1.93	0.90444	1.11691	2.57402	3.53188		1.93	0.511489	4.63029	3.72746	0.443552
1.93333	0.907666	1.11639	2.57451	3.54238		1.93333	0.515523	4.63428	3.74172	0.446586
1.93667	0.911785	1.12305	2.5862	3.55239		1.93667	0.518053	4.64861	3.75552	0.447755
1.94	0.91696	1.12371	2.59563	3.55943		1.94	0.522057	4.658	3.76656	0.450317
1.94333	0.920834	1.12861	2.60495	3.57766		1.94333	0.523073	4.67074	3.77251	0.452179
1.94667	0.925043	1.13159	2.61557	3.58706		1.94667	0.525282	4.68432	3.78452	0.453264
1.95	0.933388	1.13977	2.62167	3.59513		1.95	0.526562	4.69753	3.79366	0.456056
1.95333	0.934475	1.14868	2.62778	3.61157		1.95333	0.529109	4.7108	3.80673	0.458181
1.95667	0.935309	1.14371	2.63765	3.61794		1.95667	0.530969	4.72203	3.81852	0.462479
1.96	0.938451	1.15321	2.65289	3.62929		1.96	0.532922	4.73216	3.82658	0.463032
1.96333	0.945048	1.16205	2.66064	3.64274		1.96333	0.537234	4.74518	3.8424	0.463489
1.96667	0.952361	1.16242	2.66473	3.64889		1.96667	0.539347	4.76207	3.85411	0.464521
1.97	0.951805	1.16752	2.67407	3.66542		1.97	0.542859	4.7663	3.865	0.465545
1.97333	0.959941	1.1738	2.67843	3.67391		1.97333	0.54462	4.78277	3.87807	0.466881
1.97667	0.965062	1.17605	2.69793	3.68152		1.97667	0.548862	4.78943	3.88775	0.469772
1.98	0.966986	1.18068	2.70549	3.69543		1.98	0.548475	4.80653	3.89847	0.473978
1.98333	0.972974	1.18221	2.71138	3.70921		1.98333	0.550866	4.81437	3.91142	0.476163
1.98667	0.973655	1.19276	2.71703	3.71597		1.98667	0.551186	4.83027	3.92277	0.478506
1.99	0.975968	1.19372	2.72917	3.72715		1.99	0.552378	4.83846	3.92794	0.479341
1.99333	0.98175	1.19899	2.73662	3.74192		1.99333	0.554156	4.85144	3.94342	0.480882
1.99667	0.988812	1.20454	2.74827	3.74902		1.99667	0.557691	4.86648	3.95519	0.481395
2	0.995052	1.20361	2.75429	3.75968		2	0.560743	4.87675	3.96711	0.484734
2.00333	0.997748	1.21092	2.76331	3.77241		2.00333	0.565291	4.88542	3.97747	0.487405
2.00667	1.00031	1.21461	2.77886	3.78053		2.00667	0.569045	4.90393	3.99206	0.490648
2.01	1.00226	1.22003	2.78533	3.7908		2.01	0.572038	4.90931	3.99483	0.49255
2.01333	1.01046	1.22294	2.79368	3.80525		2.01333	0.576419	4.92476	4.00661	0.497901
2.01667	1.01636	1.23468	2.79808	3.81074		2.01667	0.578738	4.93488	4.02156	0.499458
2.02	1.01489	1.23454	2.80749	3.82143		2.02	0.579761	4.94582	4.02941	0.499201
2.02333	1.01994	1.2361	2.81777	3.83709		2.02333	0.582579	4.95592	4.03932	0.500383
2.02667	1.02661	1.24314	2.82815	3.84195		2.02667	0.584435	4.96125	4.05616	0.50181
2.03	1.03106	1.24838	2.83564	3.85459		2.03	0.585949	4.97827	4.06471	0.501348
2.03333	1.03716	1.24993	2.8474	3.87012		2.03333	0.58812	4.99218	4.07319	0.504928
2.03667	1.03808	1.25184	2.85004	3.87306		2.03667	0.5913	4.99762	4.08749	0.50936
2.04	1.04365	1.25853	2.86828	3.89151		2.04	0.593055	5.00866	4.09688	0.511975
2.04333	1.04881	1.26697	2.87093	3.89442		2.04333	0.593921	5.02029	4.10722	0.514941
2.04667	1.05179	1.26603	2.87875	3.90887		2.04667	0.596999	5.03229	4.11458	0.515915
2.05	1.05522	1.27348	2.88634	3.92077		2.05	0.599634	5.04267	4.12682	0.51682
2.05333	1.06353	1.27776	2.90034	3.92988		2.05333	0.601836	5.05619	4.1381	0.519032
2.05667	1.06429	1.28238	2.90666	3.94011		2.05667	0.604522	5.06312	4.14639	0.520577
2.06	1.06941	1.28868	2.91493	3.94737		2.06	0.608732	5.07295	4.15496	0.522497
2.06333	1.07455	1.2907	2.91894	3.9554		2.06333	0.613412	5.0882	4.17191	0.526617
2.06667	1.07922	1.29681	2.9267	3.97151		2.06667	0.61521	5.0983	4.18266	0.529873
2.07	1.08214	1.30117	2.94049	3.97979		2.07	0.61851	5.10272	4.19082	0.529779
2.07333	1.09027	1.30331	2.94942	3.98737		2.07333	0.620938	5.1167	4.19997	0.533008
2.07667	1.09552	1.3148	2.96411	4.00102		2.07667	0.622781	5.1283	4.21088	0.536134
2.08	1.09441	1.31387	2.96529	4.00884		2.08	0.621631	5.13767	4.2229	0.539855
2.08333	1.09785	1.31956	2.97782	4.02218		2.08333	0.62337	5.14806	4.2278	0.540428
2.08667	1.10175	1.32384	2.98688	4.03223		2.08667	0.624452	5.16147	4.2413	0.544124
2.09	1.11004	1.32369	2.99419	4.04147		2.09	0.626181	5.17268	4.25419	0.54392
2.09333	1.11038	1.3323	3.00675	4.04845		2.09333	0.629321	5.18101	4.26162	0.544142
2.09667	1.11723	1.33597	3.00903	4.05927		2.09667	0.635126	5.19034	4.27465	0.545258
2.1	1.12163	1.34144	3.01456	4.07126		2.1	0.638996	5.20331	4.28879	0.549243
2.10333	1.12344	1.34172	3.02883	4.08156		2.10333	0.641735	5.21073	4.29339	0.552092
2.10667	1.12975	1.34952	3.03123	4.08943		2.10667	0.643935	5.22823	4.30345	0.555833
2.11	1.13691	1.34976	3.04624	4.0964		2.11	0.646167	5.23257	4.31294	0.559896
2.11333	1.13835	1.36112	3.05266	4.11244		2.11333	0.64621	5.23795	4.32451	0.56153
2.11667	1.14325	1.36019	3.06291	4.11869		2.11667	0.647303	5.25143	4.33568	0.561733
2.12	1.14585	1.37236	3.07102	4.13298		2.12	0.649754	5.25789	4.34556	0.563775
2.12333	1.15238	1.36615	3.07995	4.13994		2.12333	0.652959	5.27016	4.35574	0.564105
2.12667	1.15591	1.37668	3.09122	4.14916		2.12667	0.655455	5.28028	4.36412	0.565054
2.13	1.16344	1.38243	3.09871	4.15988		2.13	0.659143	5.29317	4.37623	0.566944
2.13333	1.16135	1.38775	3.10213	4.16848		2.13333	0.663389	5.29857	4.38326	0.570266
2.13667	1.17326	1.38574	3.11394	4.17778		2.13667	0.666615	5.30874	4.39356	0.572222
2.14	1.17438	1.40076	3.12447	4.18884		2.14	0.670242	5.31797	4.40659	0.576498
2.14333	1.17421	1.40151	3.13532	4.19648		2.14333	0.672374	5.331	4.41441	0.580611
2.14667	1.18229	1.39818	3.14503	4.20738		2.14667	0.67553	5.33843	4.42248	0.582378
2.15	1.18553	1.40539	3.14835	4.21325		2.15	0.677329	5.34344	4.43303	0.58548
2.15333	1.19117	1.41562	3.15923	4.2257		2.15333	0.680301	5.35572	4.44346	0.588119
2.15667	1.19874	1.418	3.1644	4.23205		2.15667	0.682435	5.36246	4.45361	0.590339
2.16	1.20078	1.42563	3.17356	4.24465		2.16	0.685919	5.37641	4.46348	0.592807
2.16333	1.20349	1.42346	3.18779	4.25728		2.16333	0.686995	5.38328	4.4734	0.597781
2.16667	1.20928	1.43167	3.19053	4.25909		2.16667	0.689871	5.39909	4.48028	0.600863
2.17	1.2136	1.43736	3.19778	4.26993		2.17	0.691418	5.40407	4.49751	0.603435
2.17333	1.21988	1.44134	3.2064	4.2801		2.17333	0.69262	5.41333	4.50292	0.606428
2.17667	1.22158	1.44175	3.2166	4.29493		2.17667	0.695651	5.42035	4.51367	0.607042
2.18	1.22798	1.45318	3.22571	4.2976		2.18	0.69931	5.43098	4.52042	0.606824
2.18333	1.23637	1.45674	3.23404	4.31217		2.18333	0.699977	5.4428	4.52844	0.608572
2.18667	1.23517	1.45953	3.24008	4.32458		2.18667	0.703179	5.44702	4.54373	0.609196
2.19	1.24088	1.46423	3.25111	4.32708		2.19	0.703708	5.46388	4.54503	0.611463
2.19333	1.24388	1.46842	3.25947	4.33505		2.19333	0.705775	5.45994	4.55948	0.613801
2.19667	1.24808	1.47221	3.26532	4.34655		2.19667	0.708558	5.47219	4.5639	0.615228
2.2	1.25702	1.47849	3.27505	4.35446		2.2	0.714201	5.48572	4.57919	0.619029
2.20333	1.2574	1.48439	3.28458	4.36486		2.20333	0.716007	5.4937	4.58567	0.623232
2.20667	1.25952	1.48396	3.29037	4.37617		2.20667	0.721341	5.50185	4.59419	0.624259
2.21	1.26925	1.48891	3.29875	4.38369		2.21	0.723853	5.50898	4.60421	0.627475
2.21333	1.26937	1.4975	3.30844	4.39046		2.21333	0.727795	5.51712	4.61218	0.632401
2.21667	1.27566	1.49887	3.31682	4.40081		2.21667	0.729987	5.52796	4.61995	0.6332
2.22	1.2834	1.50554	3.32141	4.40666		2.22	0.733351	5.53203	4.62764	0.634719
2.22333	1.28317	1.5065	3.33216	4.42252		2.22333	0.737109	5.54445	4.6423	0.638083
2.22667	1.28968	1.51416	3.34506	4.4309		2.22667	0.738784	5.55513	4.65362	0.640278
2.23	1.29637	1.51551	3.35197	4.43689		2.23	0.740443	5.55708	4.65566	0.641629
2.23333	1.30188	1.52238	3.35935	4.4478		2.23333	0.741496	5.57093	4.66927	0.643944
2.23667	1.30374	1.52648	3.36632	4.45775		2.23667	0.74335	5.57604	4.67403	0.647751
2.24	1.3075	1.52991	3.37387	4.46471		2.24	0.745503	5.58547	4.68537	0.651416
2.24333	1.3125	1.53714	3.38094	4.47276		2.24333	0.747898	5.59683	4.69756	0.654082
2.24667	1.31468	1.54205	3.3872	4.48208		2.24667	0.752103	5.60259	4.69952	0.656033
2.25	1.31557	1.54164	3.39908	4.48969		2.25	0.757158	5.60994	4.71399	0.658976
2.25333	1.32819	1.55151	3.4109	4.50001		2.25333	0.758178	5.61931	4.72344	0.658321
2.25667	1.33247	1.55351	3.4109	4.50636		2.25667	0.760571	5.62535	4.73106	0.661645
2.26	1.33444	1.55696	3.42346	4.51524		2.26	0.764949	5.632	4.7372	0.665032
2.26333	1.33775	1.57022	3.43142	4.52359		2.26333	0.766434	5.64164	4.74701	0.668442
2.26667	1.34594	1.56915	3.43648	4.53483		2.26667	0.767912	5.64877	4.75752	0.672142
2.27	1.3497	1.57222	3.44672	4.53993		2.27	0.773597	5.6575	4.77211	0.67575
2.27333	1.35031	1.5827	3.45752	4.54788		2.27333	0.776671	5.66855	4.77206	0.676306
2.27667	1.35793	1.58712	3.46569	4.55705		2.27667	0.779031	5.6812	4.78168	0.677085
2.28	1.36194	1.58629	3.47201	4.56702		2.28	0.780837	5.68008	4.78889	0.678431
2.28333	1.36624	1.59371	3.47682	4.57504		2.28333	0.783196	5.68903	4.79911	0.680049
2.28667	1.3721	1.59689	3.48777	4.57562		2.28667	0.783565	5.69741	4.80567	0.681912
2.29	1.37577	1.59827	3.49649	4.59181		2.29	0.786014	5.70374	4.81303	0.68438
2.29333	1.37815	1.60127	3.50266	4.59552		2.29333	0.787236	5.70977	4.82577	0.687849
2.29667	1.38645	1.61186	3.50839	4.61235		2.29667	0.791429	5.72196	4.82824	0.690778
2.3	1.39299	1.61097	3.51668	4.61431		2.3	0.795091	5.72361	4.83695	0.695142
2.30333	1.39744	1.62418	3.53207	4.62225		2.30333	0.800406	5.73144	4.84583	0.697554
2.30667	1.39529	1.62084	3.53224	4.63091		2.30667	0.801964	5.73548	4.85852	0.700356
2.31	1.40445	1.63219	3.54003	4.64485		2.31	0.805839	5.74771	4.86527	0.701825
2.31333	1.40575	1.63194	3.55042	4.64938		2.31333	0.807847	5.75315	4.86807	0.70484
2.31667	1.4155	1.64131	3.55987	4.6603		2.31667	0.810052	5.76204	4.88102	0.707924
2.32	1.41769	1.63878	3.56222	4.66796		2.32	0.810619	5.76698	4.89127	0.709889
2.32333	1.42422	1.64837	3.57292	4.67172		2.32333	0.813179	5.7769	4.89276	0.711107
2.32667	1.42802	1.65201	3.58644	4.67893		2.32667	0.816312	5.78771	4.9074	0.712648
2.33	1.42819	1.65411	3.58464	4.68952		2.33	0.820374	5.79243	4.91767	0.715298
2.33333	1.43603	1.66004	3.59732	4.69619		2.33333	0.824449	5.79319	4.92653	0.715641
2.33667	1.43664	1.66701	3.60156	4.70483		2.33667	0.827771	5.80204	4.92931	0.720947
2.34	1.44564	1.66638	3.61165	4.71739		2.34	0.831484	5.81086	4.94262	0.724565
2.34333	1.44777	1.67498	3.62103	4.71801		2.34333	0.833441	5.82019	4.94517	0.728384
2.34667	1.45432	1.67665	3.62754	4.72651		2.34667	0.837136	5.82366	4.9521	0.732081
2.35	1.45997	1.68125	3.63855	4.73644		2.35	0.83959	5.82694	4.96505	0.734434
2.35333	1.46567	1.69266	3.6446	4.74105		2.35333	0.842664	5.83599	4.9665	0.735722
2.35667	1.4685	1.6927	3.64881	4.74812		2.35667	0.846178	5.84506	4.97707	0.737337
2.36	1.47825	1.69647	3.66146	4.75281		2.36	0.850456	5.8528	4.98802	0.738843
2.36333	1.47623	1.70371	3.66514	4.76855		2.36333	0.852401	5.85586	4.99258	0.738363
2.36667	1.48369	1.70157	3.67832	4.77789		2.36667	0.854393	5.86955	4.99924	0.744071
2.37	1.48824	1.71114	3.68694	4.78293		2.37	0.85925	5.87255	5.01149	0.747163
2.37333	1.48904	1.72052	3.69013	4.79057		2.37333	0.861995	5.87765	5.01767	0.750374
2.37667	1.49808	1.72372	3.69474	4.79412		2.37667	0.864866	5.87845	5.01726	0.754216
2.38	1.4996	1.72726	3.70338	4.80397		2.38	0.868387	5.89072	5.02703	0.758844
2.38333	1.50147	1.73239	3.71215	4.8179		2.38333	0.869898	5.89736	5.04087	0.762078
2.38667	1.50828	1.73497	3.72365	4.81951		2.38667	0.870727	5.90139	5.04222	0.763536
2.39	1.51293	1.74225	3.73102	4.82815		2.39	0.87327	5.90881	5.05119	0.766089
2.39333	1.51671	1.74605	3.73389	4.82909		2.39333	0.876132	5.91502	5.0571	0.766927
2.39667	1.52563	1.74938	3.74173	4.8375		2.39667	0.877066	5.92014	5.06884	0.77003
2.4	1.53332	1.75348	3.75286	4.84945		2.4	0.88054	5.92477	5.07483	0.769058
2.40333	1.53579	1.7596	3.75957	4.85602		2.40333	0.884822	5.92812	5.08536	0.771852
2.40667	1.53929	1.75934	3.76862	4.86399		2.40667	0.885943	5.93786	5.08868	0.775991
2.41	1.53983	1.76494	3.77438	4.86842		2.41	0.889277	5.94517	5.09332	0.780244
2.41333	1.55033	1.77247	3.78244	4.87609		2.41333	0.894475	5.9498	5.0992	0.782408
2.41667	1.54894	1.77687	3.79108	4.88218		2.41667	0.897131	5.95419	5.11301	0.78617
2.42	1.55458	1.77953	3.79908	4.89157		2.42	0.89853	5.96532	5.11945	0.789825
2.42333	1.56526	1.78464	3.80738	4.89929		2.42333	0.903742	5.96942	5.12383	0.792676
2.42667	1.56484	1.78656	3.81145	4.9005		2.42667	0.90529	5.97035	5.13311	0.795441
2.43	1.56762	1.79099	3.81476	4.91526		2.43	0.907816	5.98202	5.1343	0.79874
2.43333	1.57481	1.79764	3.82529	4.91677		2.43333	0.911628	5.97998	5.14633	0.802319
2.43667	1.5788	1.80439	3.83595	4.92262		2.43667	0.913581	5.99014	5.15345	0.804125
2.44	1.57984	1.80593	3.84284	4.93332		2.44	0.916131	5.99868	5.16244	0.80583
2.44333	1.58931	1.80785	3.84851	4.93903		2.44333	0.918103	6.00398	5.16625	0.80918
2.44667	1.58986	1.81569	3.85343	4.94974		2.44667	0.924157	6.00989	5.16854	0.81366
2.45	1.59234	1.82129	3.86367	4.94994		2.45	0.927495	6.01793	5.17762	0.816769
2.45333	1.60036	1.82929	3.86828	4.95938		2.45333	0.929547	6.0151	5.18545	0.820537
2.45667	1.60963	1.83515	3.87684	4.96728		2.45667	0.93351	6.02718	5.19134	0.821559
2.46	1.60961	1.83528	3.88171	4.97317		2.46	0.93686	6.02988	5.19983	0.823624
2.46333	1.61832	1.84145	3.88927	4.9811		2.46333	0.939443	6.03509	5.20672	0.825098
2.46667	1.6217	1.84547	3.89713	4.98886		2.46667	0.942896	6.04169	5.21538	0.829501
2.47	1.63048	1.85038	3.90675	4.99242		2.47	0.949241	6.04452	5.22304	0.83323
2.47333	1.62927	1.85355	3.90982	4.99767		2.47333	0.952337	6.05035	5.22547	0.838846
2.47667	1.63117	1.85932	3.92304	5.00463		2.47667	0.954799	6.05903	5.23076	0.842085
2.48	1.63702	1.86439	3.92782	5.01239		2.48	0.958112	6.06231	5.24588	0.843086
2.48333	1.64022	1.86468	3.93847	5.01997		2.48333	0.960666	6.06969	5.24518	0.844784
2.48667	1.64783	1.87181	3.93917	5.02356		2.48667	0.963818	6.07476	5.25075	0.846082
2.49	1.65874	1.87551	3.94631	5.03002		2.49	0.966356	6.07786	5.26392	0.847631
2.49333	1.65659	1.88077	3.95573	5.03569		2.49333	0.970514	6.08208	5.26908	0.850101
2.49667	1.65983	1.88522	3.96388	5.04466		2.49667	0.972161	6.08847	5.2715	0.853039
2.5	1.6682	1.89047	3.96978	5.04945		2.5	0.976217	6.08886	5.27696	0.857224
2.50333	1.66981	1.88919	3.98004	5.05708		2.50333	0.9787	6.10014	5.28445	0.860219
2.50667	1.67595	1.90111	3.98429	5.06545		2.50667	0.982114	6.10429	5.29264	0.864104
2.51	1.68393	1.903	3.98885	5.06538		2.51	0.984616	6.10515	5.29656	0.866883
2.51333	1.6849	1.91003	3.99497	5.07649		2.51333	0.98649	6.1104	5.30736	0.870465
2.51667	1.68778	1.91398	4.00254	5.07977		2.51667	0.987251	6.11647	5.31123	0.871126
2.52	1.69484	1.91885	4.00997	5.09093		2.52	0.990289	6.12279	5.31831	0.874538
2.52333	1.6976	1.91867	4.01896	5.09504		2.52333	0.992531	6.12941	5.32049	0.874613
2.52667	1.70766	1.92851	4.02625	5.10344		2.52667	0.996542	6.13592	5.33013	0.878017
2.53	1.71293	1.93248	4.03334	5.11073		2.53	1.0029	6.1408	5.33121	0.881452
2.53333	1.71429	1.93862	4.03822	5.10845		2.53333	1.00659	6.14092	5.34107	0.886248
2.53667	1.71571	1.93949	4.04534	5.12171		2.53667	1.00966	6.14662	5.3464	0.887538
2.54	1.72069	1.94173	4.04952	5.12503		2.54	1.01181	6.15378	5.34949	0.892009
2.54333	1.72412	1.94839	4.05432	5.13352		2.54333	1.01404	6.15301	5.35795	0.895239
2.54667	1.72893	1.95678	4.07298	5.13434		2.54667	1.01689	6.15933	5.36383	0.896772
2.55	1.73187	1.95829	4.07044	5.14479		2.55	1.01932	6.16539	5.3675	0.900037
2.55333	1.73683	1.96076	4.0788	5.14205		2.55333	1.0211	6.16831	5.37476	0.902271
2.55667	1.75024	1.96509	4.08053	5.15281		2.55667	1.02281	6.17657	5.38217	0.906108
2.56	1.75075	1.96794	4.08847	5.15652		2.56	1.0269	6.18294	5.38799	0.908224
2.56333	1.75775	1.97563	4.0998	5.1669		2.56333	1.02986	6.18268	5.39413	0.911459
2.56667	1.76042	1.98204	4.10206	5.17051		2.56667	1.03379	6.18542	5.40015	0.914035
2.57	1.76196	1.99079	4.11201	5.17629		2.57	1.036	6.18993	5.40491	0.918214
2.57333	1.76982	1.98758	4.11391	5.17961		2.57333	1.04156	6.19919	5.41798	0.918996
2.57667	1.77291	1.9933	4.13357	5.1889		2.57667	1.04509	6.1991	5.4212	0.920794
2.58	1.77865	1.99806	4.12773	5.19215		2.58	1.0477	6.20763	5.4296	0.92483
2.58333	1.78195	2.00614	4.14402	5.20024		2.58333	1.05	6.20695	5.42779	0.929384
2.58667	1.78959	2.00752	4.149	5.205		2.58667	1.05503	6.21583	5.43595	0.933286
2.59	1.79563	2.01449	4.15	5.2124		2.59	1.05788	6.22037	5.44052	0.935898
2.59333	1.79581	2.0174	4.16014	5.21548		2.59333	1.06148	6.22158	5.44887	0.938146
2.59667	1.80434	2.02248	4.16291	5.21905		2.59667	1.065	6.2249	5.4552	0.939887
2.6	1.80624	2.02407	4.17409	5.22401		2.6	1.06878	6.22907	5.45342	0.942041
2.60333	1.80994	2.03014	4.17658	5.23142		2.60333	1.07265	6.23391	5.46265	0.945735
2.60667	1.81418	2.03848	4.18268	5.23869		2.60667	1.07598	6.23978	5.46694	0.949181
2.61	1.82338	2.04313	4.18831	5.24173		2.61	1.07786	6.24645	5.47325	0.95231
2.61333	1.82402	2.05167	4.19865	5.24614		2.61333	1.08259	6.24423	5.4757	0.957356
2.61667	1.82976	2.05005	4.19955	5.25039		2.61667	1.08527	6.25018	5.48325	0.960027
2.62	1.83548	2.05621	4.2132	5.25903		2.62	1.08689	6.25142	5.48986	0.961005
2.62333	1.83801	2.05902	4.21373	5.26556		2.62333	1.08939	6.2578	5.50182	0.963357
2.62667	1.84676	2.06071	4.2228	5.26796		2.62667	1.09354	6.26391	5.50224	0.966931
2.63	1.85328	2.06377	4.23256	5.27318		2.63	1.0959	6.27063	5.50701	0.967229
2.63333	1.85347	2.07518	4.23592	5.27894		2.63333	1.09937	6.27289	5.51148	0.971649
2.63667	1.85488	2.07486	4.23967	5.28107		2.63667	1.10399	6.27391	5.51585	0.975782
2.64	1.8616	2.07755	4.25235	5.28745		2.64	1.10753	6.27762	5.52494	0.981163
2.64333	1.86897	2.08229	4.25252	5.29464		2.64333	1.10941	6.2823	5.52518	0.985526
2.64667	1.87289	2.08664	4.25642	5.29773		2.64667	1.11216	6.29166	5.53123	0.988473
2.65	1.87795	2.09304	4.26305	5.30084		2.65	1.11491	6.28933	5.54279	0.992576
2.65333	1.87415	2.09736	4.27429	5.30981		2.65333	1.11813	6.29006	5.54221	0.996437
2.65667	1.88745	2.10438	4.27676	5.30864		2.65667	1.12133	6.29909	5.53975	0.999104
2.66	1.88991	2.10736	4.28476	5.32095		2.66	1.12612	6.29544	5.55454	1.00135
2.66333	1.89527	2.10833	4.29321	5.32322		2.66333	1.12853	6.30705	5.55355	1.00535
2.66667	1.89721	2.11702	4.30114	5.32792		2.66667	1.13291	6.30758	5.55795	1.00641
2.67	1.90471	2.12007	4.29972	5.33701		2.67	1.13517	6.31064	5.56593	1.00779
2.67333	1.90451	2.12342	4.31252	5.33852		2.67333	1.13735	6.31194	5.56903	1.01033
2.67667	1.91052	2.13265	4.3145	5.34312		2.67667	1.13844	6.3182	5.57024	1.015
2.68	1.92012	2.13481	4.3249	5.34943		2.68	1.14452	6.32255	5.57807	1.01861
2.68333	1.92436	2.13949	4.32582	5.35373		2.68333	1.14698	6.32264	5.58691	1.02233
2.68667	1.92934	2.14118	4.33931	5.35376		2.68667	1.15087	6.33098	5.58597	1.02654
2.69	1.93247	2.14939	4.34149	5.36617		2.69	1.15448	6.33455	5.59313	1.03034
2.69333	1.93239	2.14902	4.34433	5.36845		2.69333	1.1579	6.34236	5.60158	1.03321
2.69667	1.93946	2.16068	4.3509	5.37086		2.69667	1.1588	6.34289	5.61023	1.03535
2.7	1.94653	2.16452	4.3572	5.37733		2.7	1.16147	6.34599	5.6078	1.03819
2.70333	1.95116	2.16608	4.36303	5.37799		2.70333	1.1647	6.35083	5.61105	1.03902
2.70667	1.95895	2.17048	4.37064	5.3846		2.70667	1.16872	6.35503	5.61776	1.04241
2.71	1.96051	2.17982	4.37256	5.38834		2.71	1.1732	6.35896	5.61876	1.04375
2.71333	1.96349	2.18001	4.38264	5.39549		2.71333	1.17678	6.35237	5.62876	1.04706
2.71667	1.97242	2.18127	4.39155	5.39937		2.71667	1.18036	6.36276	5.6333	1.05163
2.72	1.97506	2.18867	4.39746	5.39804		2.72	1.18233	6.36389	5.63839	1.05586
2.72333	1.9748	2.19199	4.39601	5.40317		2.72333	1.18452	6.3659	5.64383	1.05852
2.72667	1.98298	2.20127	4.40239	5.41141		2.72667	1.18671	6.37488	5.65253	1.06311
2.73	1.98765	2.20244	4.41362	5.41667		2.73	1.18995	6.37298	5.65319	1.06741
2.73333	1.99132	2.20575	4.4142	5.42385		2.73333	1.19266	6.38363	5.65646	1.06948
2.73667	2.00038	2.20901	4.42096	5.42257		2.73667	1.19537	6.37959	5.66086	1.07329
2.74	1.99916	2.2152	4.42804	5.43288		2.74	1.19893	6.38417	5.65736	1.07585
2.74333	2.00842	2.22175	4.43183	5.43142		2.74333	1.20327	6.38512	5.66835	1.07879
2.74667	2.00797	2.22109	4.43788	5.43883		2.74667	1.20882	6.39086	5.6782	1.08145
2.75	2.0153	2.22923	4.44645	5.44605		2.75	1.21375	6.39572	5.67469	1.08384
2.75333	2.02038	2.23635	4.44659	5.4462		2.75333	1.21929	6.39853	5.68122	1.08737
2.75667	2.02331	2.23769	4.4636	5.45418		2.75667	1.22201	6.39978	5.68154	1.09141
2.76	2.02992	2.24482	4.46357	5.45552		2.76	1.22485	6.40177	5.68776	1.09313
2.76333	2.03421	2.24765	4.46885	5.45983		2.76333	1.22716	6.40274	5.69415	1.09481
2.76667	2.04011	2.24929	4.47879	5.466		2.76667	1.23125	6.40915	5.69855	1.09852
2.77	2.04421	2.25524	4.48311	5.46767		2.77	1.23225	6.41093	5.70145	1.10106
2.77333	2.04553	2.25867	4.48769	5.4728		2.77333	1.23656	6.4137	5.70805	1.10278
2.77667	2.04856	2.26028	4.49325	5.47856		2.77667	1.23816	6.41652	5.70913	1.10862
2.78	2.05991	2.2677	4.49584	5.47946		2.78	1.24116	6.42091	5.7091	1.11357
2.78333	2.05896	2.27385	4.50246	5.48477		2.78333	1.24304	6.42378	5.72071	1.11759
2.78667	2.06851	2.27643	4.50881	5.49196		2.78667	1.24848	6.42525	5.72252	1.1202
2.79	2.06991	2.28124	4.51507	5.49642		2.79	1.25099	6.43138	5.72969	1.12291
2.79333	2.0756	2.28457	4.51745	5.49246		2.79333	1.25501	6.43109	5.73113	1.1237
2.79667	2.07599	2.29071	4.51967	5.49925		2.79667	1.26004	6.43361	5.74186	1.12469
2.8	2.08872	2.2953	4.52775	5.50771		2.8	1.26353	6.4398	5.74079	1.12882
2.80333	2.09015	2.29903	4.53628	5.50689		2.80333	1.26602	6.44494	5.74362	1.13189
2.80667	2.09013	2.30183	4.54229	5.50995		2.80667	1.26958	6.44242	5.74952	1.13502
2.81	2.09362	2.30559	4.54177	5.51503		2.81	1.27438	6.44603	5.74985	1.13843
2.81333	2.10442	2.31287	4.54582	5.52145		2.81333	1.27679	6.45201	5.75756	1.14343
2.81667	2.11012	2.31324	4.55598	5.52323		2.81667	1.27909	6.45509	5.76026	1.14634
2.82	2.11034	2.31687	4.56112	5.52825		2.82	1.28088	6.45507	5.76487	1.15046
2.82333	2.11373	2.32701	4.56801	5.53115		2.82333	1.2834	6.46312	5.76424	1.1538
2.82667	2.11931	2.32485	4.57152	5.53584		2.82667	1.28702	6.4686	5.77097	1.15616
2.83	2.12684	2.33086	4.57291	5.53185		2.83	1.28871	6.45998	5.77718	1.15726
2.83333	2.13133	2.33789	4.58065	5.54109		2.83333	1.29208	6.46759	5.77298	1.16218
2.83667	2.13424	2.33987	4.58603	5.54878		2.83667	1.29425	6.46989	5.77977	1.16543
2.84	2.13777	2.34482	4.59724	5.5506		2.84	1.29687	6.47186	5.78528	1.17074
2.84333	2.14422	2.35561	4.59676	5.55681		2.84333	1.29901	6.47485	5.78825	1.17487
2.84667	2.14487	2.35489	4.60313	5.55633		2.84667	1.30398	6.47472	5.79331	1.17856
2.85	2.15243	2.3601	4.6077	5.55176		2.85	1.30627	6.47702	5.79687	1.18274
2.85333	2.15787	2.36585	4.61582	5.56074		2.85333	1.30991	6.4824	5.79935	1.18608
2.85667	2.1614	2.36731	4.61583	5.57017		2.85667	1.31403	6.49194	5.81091	1.18817
2.86	2.16484	2.37101	4.62616	5.57468		2.86	1.31663	6.48593	5.80778	1.19247
2.86333	2.17388	2.37658	4.62945	5.56832		2.86333	1.31922	6.49458	5.81098	1.19757
2.86667	2.17463	2.3775	4.63191	5.58057		2.86667	1.32329	6.49689	5.81148	1.1992
2.87	2.18071	2.38663	4.63511	5.57968		2.87	1.32803	6.49698	5.81476	1.2018
2.87333	2.18569	2.39363	4.64155	5.58989		2.87333	1.33032	6.50438	5.8254	1.20453
2.87667	2.18881	2.39244	4.65171	5.58436		2.87667	1.335	6.50755	5.82213	1.20833
2.88	2.19133	2.40252	4.65363	5.5923		2.88	1.33961	6.50717	5.83338	1.21051
2.88333	2.19818	2.40101	4.65699	5.5909		2.88333	1.34306	6.51155	5.83256	1.21397
2.88667	2.20802	2.40478	4.66064	5.59965		2.88667	1.3448	6.51328	5.83863	1.21682
2.89	2.20436	2.41234	4.66831	5.60348		2.89	1.34853	6.51861	5.83974	1.2216
2.89333	2.21285	2.41339	4.67503	5.60279		2.89333	1.35234	6.51555	5.84239	1.22238
2.89667	2.21523	2.41811	4.67401	5.61006		2.89667	1.35344	6.51595	5.84756	1.22552
2.9	2.22009	2.42241	4.68839	5.61374		2.9	1.35686	6.52201	5.84654	1.22936
2.90333	2.22536	2.42891	4.68513	5.61261		2.90333	1.35974	6.52384	5.85553	1.23421
2.90667	2.23219	2.43461	4.69596	5.61446		2.90667	1.36195	6.52631	5.85376	1.2366
2.91	2.23068	2.43007	4.69743	5.6211		2.91	1.36524	6.53405	5.85915	1.23996
2.91333	2.234	2.44093	4.69621	5.62073		2.91333	1.37069	6.52774	5.8673	1.24495
2.91667	2.24507	2.44857	4.70517	5.62643		2.91667	1.3739	6.53147	5.86907	1.24893
2.92	2.24318	2.45271	4.71348	5.63419		2.92	1.37962	6.5366	5.86946	1.25243
2.92333	2.25092	2.45758	4.71966	5.63688		2.92333	1.38448	6.53321	5.87184	1.25638
2.92667	2.2557	2.4592	4.72155	5.63734		2.92667	1.38611	6.53706	5.87311	1.2604
2.93	2.26305	2.45891	4.73037	5.64258		2.93	1.38825	6.54658	5.88144	1.26245
2.93333	2.26843	2.46384	4.7335	5.6371		2.93333	1.39153	6.55063	5.88227	1.26627
2.93667	2.27325	2.47445	4.74296	5.6477		2.93667	1.39346	6.54374	5.88651	1.26964
2.94	2.27452	2.47534	4.73964	5.65167		2.94	1.397	6.55541	5.89008	1.27309
2.94333	2.2794	2.48109	4.74615	5.65252		2.94333	1.40313	6.55537	5.89174	1.27639
2.94667	2.28585	2.48818	4.75207	5.65872		2.94667	1.40629	6.55718	5.89322	1.27949
2.95	2.28952	2.48788	4.75429	5.6628		2.95	1.40873	6.56101	5.90166	1.28353
2.95333	2.29383	2.491	4.76053	5.66061		2.95333	1.41097	6.55891	5.90655	1.28558
2.95667	2.29661	2.49965	4.76282	5.6644		2.95667	1.41328	6.56588	5.90444	1.28839
2.96	2.30075	2.50309	4.7668	5.66593		2.96	1.41552	6.56541	5.90965	1.29273
2.96333	2.29854	2.51053	4.77565	5.66984		2.96333	1.41966	6.56406	5.91107	1.29465
2.96667	2.31071	2.51083	4.77915	5.66785		2.96667	1.42456	6.56794	5.91368	1.29941
2.97	2.31332	2.51377	4.78201	5.67247		2.97	1.42837	6.57125	5.91873	1.30363
2.97333	2.31785	2.51711	4.78763	5.67842		2.97333	1.43222	6.57136	5.92019	1.30622
2.97667	2.32535	2.52278	4.79297	5.67988		2.97667	1.43636	6.58	5.92144	1.30883
2.98	2.32555	2.5247	4.79623	5.68596		2.98	1.439	6.57931	5.92575	1.31461
2.98333	2.33144	2.53203	4.80204	5.68593		2.98333	1.44096	6.58202	5.93336	1.31541
2.98667	2.33424	2.53702	4.80567	5.69176		2.98667	1.44439	6.58247	5.93147	1.31991
2.99	2.34275	2.53499	4.80972	5.69243		2.99	1.44651	6.5842	5.93566	1.32367
2.99333	2.34558	2.53879	4.81333	5.69843		2.99333	1.44997	6.58583	5.93863	1.3261
2.99667	2.34762	2.54509	4.82048	5.69949		2.99667	1.45515	6.58952	5.94314	1.32961
3	2.3576	2.55431	4.81625	5.7027		3	1.45981	6.59383	5.94602	1.33337
3.00333	2.35768	2.55651	4.82482	5.70097		3.00333	1.46413	6.59273	5.94667	1.33652
3.00667	2.36268	2.55905	4.83039	5.7059		3.00667	1.47042	6.59655	5.95252	1.33806
3.01	2.37352	2.57193	4.84177	5.70743		3.01	1.47424	6.60068	5.95539	1.34479
3.01333	2.37147	2.56779	4.83943	5.71497		3.01333	1.4752	6.60183	5.96016	1.34839
3.01667	2.37347	2.57064	4.84565	5.71507		3.01667	1.47707	6.60576	5.95708	1.35145
3.02	2.37973	2.58066	4.84968	5.71985		3.02	1.47992	6.60093	5.96267	1.35332
3.02333	2.38728	2.58197	4.8536	5.7234		3.02333	1.48249	6.61078	5.96423	1.35911
3.02667	2.38827	2.58691	4.85958	5.72502		3.02667	1.48571	6.60581	5.96578	1.36161
3.03	2.39366	2.59051	4.85851	5.72949		3.03	1.49142	6.61368	5.97193	1.36399
3.03333	2.40114	2.59815	4.86361	5.72999		3.03333	1.49348	6.61232	5.97263	1.3685
3.03667	2.40039	2.59788	4.8728	5.72969		3.03667	1.49757	6.61395	5.97627	1.37138
3.04	2.40811	2.60135	4.87144	5.73409		3.04	1.50013	6.61618	5.97622	1.37576
3.04333	2.41277	2.60567	4.87868	5.73725		3.04333	1.50476	6.6209	5.98034	1.37748
3.04667	2.41315	2.6097	4.88608	5.74286		3.04667	1.50726	6.61988	5.9873	1.3804
3.05	2.41794	2.61	4.88566	5.74668		3.05	1.51227	6.62471	5.98516	1.38377
3.05333	2.42402	2.62131	4.88391	5.74536		3.05333	1.51652	6.62438	5.99123	1.38838
3.05667	2.42568	2.62532	4.89127	5.74543		3.05667	1.5187	6.63011	5.99094	1.38911
3.06	2.43301	2.62419	4.90115	5.75		3.06	1.5216	6.62884	5.99594	1.39381
3.06333	2.44118	2.63138	4.90241	5.75259		3.06333	1.52491	6.63376	6.00224	1.39744
3.06667	2.43826	2.63524	4.91125	5.7558		3.06667	1.52925	6.63326	5.99966	1.39973
3.07	2.44862	2.63781	4.91215	5.76258		3.07	1.53212	6.63838	6.007	1.40249
3.07333	2.45264	2.64477	4.91124	5.75834		3.07333	1.53771	6.63613	6.00427	1.40668
3.07667	2.45727	2.64609	4.91643	5.76032		3.07667	1.53902	6.63979	6.00717	1.4084
3.08	2.45928	2.64984	4.92295	5.76423		3.08	1.54217	6.64416	6.01265	1.4131
3.08333	2.46037	2.65413	4.92288	5.76765		3.08333	1.54429	6.64402	6.01375	1.41772
3.08667	2.46954	2.66454	4.92734	5.77387		3.08667	1.54734	6.6477	6.01661	1.42071
3.09	2.46891	2.66363	4.93644	5.77703		3.09	1.54898	6.64889	6.01992	1.42397
3.09333	2.47432	2.67418	4.93382	5.77757		3.09333	1.55552	6.64869	6.01816	1.42899
3.09667	2.4805	2.67204	4.94393	5.77796		3.09667	1.55868	6.64719	6.02197	1.43129
3.1	2.48803	2.67501	4.94226	5.7808		3.1	1.5627	6.65401	6.02029	1.43452
3.10333	2.492	2.68166	4.94743	5.77548		3.10333	1.56496	6.65691	6.02988	1.44005
3.10667	2.49793	2.68496	4.95199	5.78324		3.10667	1.56857	6.65744	6.03134	1.44382
3.11	2.50029	2.69012	4.95884	5.78526		3.11	1.56983	6.66108	6.03679	1.44717
3.11333	2.50293	2.69509	4.96067	5.78747		3.11333	1.57257	6.65852	6.03764	1.45049
3.11667	2.50731	2.6964	4.965	5.79309		3.11667	1.57467	6.66434	6.03781	1.45472
3.12	2.51089	2.69058	4.97454	5.79059		3.12	1.58048	6.66626	6.0417	1.45564
3.12333	2.51558	2.70468	4.97457	5.79743		3.12333	1.58476	6.66564	6.04512	1.46086
3.12667	2.51912	2.70696	4.97218	5.79633		3.12667	1.59009	6.67323	6.04463	1.46385
3.13	2.52151	2.71016	4.98133	5.80308		3.13	1.59476	6.66896	6.05337	1.46644
3.13333	2.52927	2.71214	4.98924	5.80825		3.13333	1.60052	6.67293	6.04714	1.47034
3.13667	2.53345	2.72194	4.99048	5.80586		3.13667	1.60365	6.67619	6.05404	1.47504
3.14	2.54038	2.7247	4.99279	5.80698		3.14	1.60501	6.6762	6.06031	1.47687
3.14333	2.54089	2.72852	4.99748	5.81282		3.14333	1.6063	6.67939	6.05785	1.47853
3.14667	2.54617	2.73358	4.99823	5.81401		3.14667	1.60985	6.6839	6.06384	1.48255
3.15	2.55524	2.73438	5.00473	5.81152		3.15	1.61171	6.6845	6.05899	1.4856
3.15333	2.5541	2.74174	5.00703	5.81716		3.15333	1.61312	6.68371	6.06818	1.49039
3.15667	2.56031	2.75041	5.01017	5.81743		3.15667	1.61755	6.6848	6.06994	1.49335
3.16	2.5645	2.74693	5.01107	5.82195		3.16	1.62309	6.69044	6.07165	1.49838
3.16333	2.56796	2.74914	5.01688	5.82452		3.16333	1.62672	6.69283	6.07393	1.50302
3.16667	2.57317	2.75583	5.02016	5.82353		3.16667	1.62972	6.69342	6.07698	1.50683
3.17	2.5742	2.75898	5.02852	5.83087		3.17	1.63208	6.69071	6.07283	1.51059
3.17333	2.57806	2.76691	5.02294	5.8357		3.17333	1.63626	6.69258	6.07958	1.5145
3.17667	2.58703	2.77049	5.03098	5.83226		3.17667	1.63818	6.69908	6.07922	1.51607
3.18	2.58953	2.77073	5.0336	5.83813		3.18	1.63981	6.69168	6.08623	1.52015
3.18333	2.59026	2.774	5.04073	5.83722		3.18333	1.64285	6.69895	6.0806	1.52262
3.18667	2.59478	2.77983	5.03598	5.83755		3.18667	1.64776	6.7027	6.08688	1.52741
3.19	2.60094	2.78327	5.0462	5.84145		3.19	1.65119	6.70262	6.09137	1.52928
3.19333	2.60303	2.78704	5.0505	5.84656		3.19333	1.65503	6.70722	6.09505	1.53475
3.19667	2.61003	2.7934	5.05179	5.84571		3.19667	1.65893	6.70502	6.09524	1.53728
3.2	2.61356	2.79573	5.05868	5.84974		3.2	1.65973	6.70525	6.10013	1.54358
3.20333	2.61741	2.79682	5.06522	5.84819		3.20333	1.66309	6.71098	6.09812	1.5455
3.20667	2.62095	2.8016	5.05987	5.85132		3.20667	1.66648	6.7113	6.10267	1.55126
3.21	2.62734	2.8088	5.06629	5.85795		3.21	1.67168	6.71498	6.10441	1.55396
3.21333	2.62707	2.816	5.06434	5.85531		3.21333	1.67525	6.71767	6.10294	1.5562
3.21667	2.63616	2.81795	5.0672	5.85764		3.21667	1.68044	6.7171	6.10682	1.55995
3.22	2.63801	2.82144	5.07229	5.85571		3.22	1.68409	6.71837	6.1099	1.56425
3.22333	2.6439	2.8257	5.07783	5.86021		3.22333	1.68672	6.72459	6.11324	1.56674
3.22667	2.64763	2.83206	5.08489	5.86589		3.22667	1.68989	6.72057	6.1137	1.57191
3.23	2.65181	2.83652	5.08584	5.87106		3.23	1.69282	6.72174	6.11784	1.57634
3.23333	2.65946	2.83739	5.0875	5.86751		3.23333	1.69799	6.72701	6.12054	1.57866
3.23667	2.65867	2.83882	5.09671	5.86943		3.23667	1.70046	6.72549	6.12326	1.58383
3.24	2.66599	2.84797	5.09612	5.8741		3.24	1.70388	6.72812	6.11901	1.58874
3.24333	2.66928	2.84362	5.09761	5.87597		3.24333	1.70706	6.73482	6.12004	1.59118
3.24667	2.67296	2.85548	5.10571	5.87075		3.24667	1.71105	6.72933	6.12983	1.59534
3.25	2.67093	2.85035	5.10918	5.88109		3.25	1.71332	6.73611	6.12851	1.59792
3.25333	2.68213	2.86395	5.11043	5.88145		3.25333	1.7155	6.73737	6.12959	1.59929
3.25667	2.68266	2.86437	5.11265	5.88149		3.25667	1.71664	6.73833	6.13747	1.60306
3.26	2.69416	2.87142	5.11688	5.88398		3.26	1.72025	6.73779	6.13418	1.6073
3.26333	2.69052	2.87045	5.11708	5.88181		3.26333	1.72394	6.74074	6.13552	1.61039
3.26667	2.70098	2.86926	5.12509	5.88553		3.26667	1.72899	6.74265	6.1409	1.61515
3.27	2.70275	2.87579	5.12242	5.89445		3.27	1.73483	6.74206	6.14076	1.61751
3.27333	2.70973	2.88214	5.13044	5.8935		3.27333	1.74089	6.74121	6.14257	1.62136
3.27667	2.71011	2.88508	5.12631	5.8985		3.27667	1.74536	6.74581	6.14735	1.62401
3.28	2.71209	2.88385	5.1357	5.89885		3.28	1.74779	6.74766	6.14798	1.62709
3.28333	2.71758	2.89884	5.14207	5.90379		3.28333	1.7505	6.7448	6.1567	1.63063
3.28667	2.71889	2.8943	5.1438	5.90321		3.28667	1.75428	6.75184	6.14651	1.63479
3.29	2.73347	2.904	5.14602	5.90383		3.29	1.75664	6.75406	6.155	1.63732
3.29333	2.73229	2.90566	5.14949	5.90464		3.29333	1.75861	6.7575	6.15415	1.64023
3.29667	2.73345	2.90967	5.15116	5.91103		3.29667	1.76255	6.76069	6.1577	1.64571
3.3	2.74036	2.91272	5.15865	5.90596		3.3	1.76694	6.76104	6.15557	1.65016
3.30333	2.74819	2.91881	5.15447	5.90587		3.30333	1.76977	6.75597	6.15944	1.65449
3.30667	2.74651	2.92248	5.16297	5.91009		3.30667	1.77468	6.76552	6.16382	1.65757
3.31	2.74839	2.9285	5.15929	5.91499		3.31	1.78022	6.75974	6.1691	1.66125
3.31333	2.7533	2.92785	5.16273	5.91487		3.31333	1.78262	6.76481	6.16706	1.6637
3.31667	2.76344	2.92772	5.17235	5.91448		3.31667	1.78392	6.76036	6.17106	1.66752
3.32	2.76118	2.93396	5.17095	5.91868		3.32	1.78694	6.77058	6.17049	1.67334
3.32333	2.76913	2.93807	5.17134	5.92123		3.32333	1.78999	6.76681	6.17252	1.6778
3.32667	2.77408	2.94364	5.17953	5.92087		3.32667	1.79202	6.76983	6.17287	1.68146
3.33	2.77229	2.94168	5.17858	5.92196		3.33	1.79558	6.77618	6.17744	1.68392
3.33333	2.77727	2.95507	5.18325	5.92643		3.33333	1.79866	6.77965	6.17467	1.68842
3.33667	2.78136	2.95552	5.18443	5.92803		3.33667	1.80095	6.77788	6.17957	1.68929
3.34	2.784	2.95905	5.18784	5.93258		3.34	1.80486	6.78227	6.18206	1.69327
3.34333	2.79042	2.96456	5.19401	5.93116		3.34333	1.80927	6.78325	6.18096	1.69719
3.34667	2.79583	2.97089	5.19393	5.92845		3.34667	1.81294	6.77899	6.1836	1.69976
3.35	2.79889	2.97003	5.19068	5.93296		3.35	1.8178	6.78208	6.18328	1.7015
3.35333	2.80195	2.97322	5.20253	5.9382		3.35333	1.82214	6.78993	6.19185	1.70653
3.35667	2.80518	2.97947	5.19887	5.93969		3.35667	1.82364	6.78477	6.19472	1.7109
3.36	2.81195	2.98088	5.21154	5.93628		3.36	1.82863	6.78734	6.19306	1.71462
3.36333	2.81576	2.98283	5.20717	5.94366		3.36333	1.83371	6.78466	6.19349	1.7184
3.36667	2.82345	2.98537	5.20901	5.94742		3.36667	1.83631	6.78995	6.19239	1.72327
3.37	2.82075	2.99284	5.21741	5.94822		3.37	1.84036	6.79347	6.20644	1.72812
3.37333	2.82635	2.998	5.21735	5.94917		3.37333	1.84361	6.78964	6.19545	1.72984
3.37667	2.83133	2.9984	5.22106	5.95204		3.37667	1.84493	6.79476	6.20132	1.73247
3.38	2.83496	3.00896	5.22083	5.95092		3.38	1.84575	6.79192	6.20281	1.7378
3.38333	2.83903	3.00422	5.22757	5.95429		3.38333	1.84942	6.80244	6.19995	1.74163
3.38667	2.84329	3.01212	5.22383	5.95235		3.38667	1.85032	6.79367	6.20625	1.74358
3.39	2.85124	3.01429	5.23207	5.95438		3.39	1.85486	6.80146	6.20981	1.74626
3.39333	2.85393	3.01272	5.23427	5.95694		3.39333	1.85721	6.80171	6.21107	1.751
3.39667	2.857	3.02027	5.23528	5.95685		3.39667	1.86108	6.8042	6.21214	1.75358
3.4	2.85952	3.02221	5.24007	5.96076		3.4	1.86314	6.80364	6.21361	1.75767
3.40333	2.86646	3.02691	5.23989	5.96445		3.40333	1.86913	6.80805	6.21558	1.76118
3.40667	2.86816	3.035	5.24582	5.96507		3.40667	1.87261	6.81117	6.22257	1.76632
3.41	2.87491	3.03829	5.24048	5.96583		3.41	1.8797	6.81247	6.22038	1.77026
3.41333	2.8785	3.03669	5.24771	5.96336		3.41333	1.88329	6.80748	6.22322	1.77452
3.41667	2.87809	3.04429	5.25179	5.96161		3.41667	1.88743	6.81165	6.22668	1.77723
3.42	2.88557	3.04754	5.25652	5.96854		3.42	1.88896	6.81101	6.22672	1.78256
3.42333	2.8888	3.05293	5.25958	5.97148		3.42333	1.89194	6.8106	6.22477	1.78562
3.42667	2.88932	3.05606	5.26012	5.96822		3.42667	1.8925	6.81816	6.2269	1.78765
3.43	2.89359	3.05973	5.26409	5.97946		3.43	1.89493	6.81397	6.23402	1.78971
3.43333	2.90181	3.05932	5.27324	5.97756		3.43333	1.89709	6.82327	6.23485	1.79373
3.43667	2.90172	3.06849	5.27336	5.97661		3.43667	1.90077	6.82141	6.23691	1.79796
3.44	2.91018	3.07277	5.27085	5.98355		3.44	1.90369	6.822	6.23192	1.80207
3.44333	2.90864	3.07427	5.27287	5.97456		3.44333	1.90932	6.82292	6.2361	1.80785
3.44667	2.91348	3.07472	5.2761	5.9837		3.44667	1.9144	6.82268	6.23865	1.81271
3.45	2.91438	3.07563	5.27928	5.98592		3.45	1.91985	6.82254	6.23888	1.81769
3.45333	2.92584	3.08556	5.2819	5.98456		3.45333	1.92302	6.82567	6.24001	1.82012
3.45667	2.92615	3.09135	5.27981	5.98621		3.45667	1.92765	6.82802	6.24143	1.82353
3.46	2.93645	3.09272	5.28807	5.98487		3.46	1.9292	6.82921	6.24336	1.82652
3.46333	2.93433	3.09621	5.28274	5.99054		3.46333	1.93193	6.83108	6.24647	1.8294
3.46667	2.93389	3.09782	5.2861	5.99042		3.46667	1.93491	6.82931	6.24937	1.83122
3.47	2.93922	3.10314	5.29206	5.99371		3.47	1.93766	6.8319	6.24995	1.83529
3.47333	2.94309	3.10653	5.29573	5.99522		3.47333	1.94069	6.83466	6.2536	1.83951
3.47667	2.94712	3.11199	5.29069	5.99969		3.47667	1.94347	6.83217	6.25412	1.8432
3.48	2.95164	3.11513	5.30087	5.99199		3.48	1.94657	6.83815	6.25391	1.84856
3.48333	2.95697	3.11498	5.30738	6.00326		3.48333	1.94894	6.83759	6.26068	1.85206
3.48667	2.96137	3.12351	5.30781	6.00207		3.48667	1.95386	6.84401	6.25633	1.85571
3.49	2.96667	3.12403	5.30965	6.00525		3.49	1.9577	6.84396	6.25979	1.85877
3.49333	2.9683	3.12647	5.30736	6.00436		3.49333	1.96198	6.8389	6.26049	1.86169
3.49667	2.97379	3.12764	5.31498	6.00257		3.49667	1.96714	6.84749	6.26257	1.8652
3.5	2.97736	3.12939	5.31045	6.01022		3.5	1.9719	6.84798	6.26254	1.87134
3.50333	2.98312	3.14048	5.31484	6.00901		3.50333	1.97463	6.84843	6.26808	1.8745
3.50667	2.98542	3.14031	5.31991	6.01258		3.50667	1.97758	6.85291	6.27006	1.87824
3.51	2.98626	3.14719	5.32519	6.01407		3.51	1.98137	6.84955	6.26551	1.88269
3.51333	2.99647	3.15472	5.32311	6.01193		3.51333	1.98191	6.84874	6.27137	1.88507
3.51667	2.99544	3.15337	5.32621	6.016		3.51667	1.9832	6.85305	6.27614	1.88647
3.52	2.99675	3.15936	5.3304	6.0153		3.52	1.98619	6.85158	6.27579	1.8908
3.52333	3.00301	3.16482	5.3313	6.01544		3.52333	1.98833	6.85899	6.27533	1.89483
3.52667	3.01058	3.1643	5.33451	6.02302		3.52667	1.99207	6.85319	6.27237	1.89777
3.53	3.00993	3.1636	5.33665	6.02237		3.53	1.99716	6.85678	6.27905	1.90239
3.53333	3.0152	3.17193	5.33517	6.02283		3.53333	2.00298	6.86275	6.28183	1.90564
3.53667	3.01653	3.1765	5.33596	6.02761		3.53667	2.00634	6.86144	6.28491	1.90811
3.54	3.02645	3.1789	5.34185	6.02331		3.54	2.01146	6.8662	6.28694	1.91123
3.54333	3.02497	3.18097	5.34518	6.02453		3.54333	2.01414	6.86612	6.28115	1.9155
3.54667	3.03002	3.17919	5.33677	6.02958		3.54667	2.01908	6.86345	6.29031	1.91888
3.55	3.03405	3.18605	5.34552	6.03272		3.55	2.02158	6.86759	6.28595	1.92426
3.55333	3.03611	3.1902	5.34855	6.03017		3.55333	2.02489	6.86745	6.29126	1.92835
3.55667	3.03922	3.19774	5.35735	6.03222		3.55667	2.02806	6.86412	6.29096	1.9327
3.56	3.04557	3.19728	5.35489	6.036		3.56	2.03198	6.8666	6.29125	1.9362
3.56333	3.04919	3.20339	5.35802	6.03402		3.56333	2.03377	6.86994	6.29697	1.94017
3.56667	3.04958	3.20282	5.35793	6.03951		3.56667	2.0365	6.87716	6.30022	1.94213
3.57	3.05582	3.21049	5.36015	6.03864		3.57	2.04194	6.87404	6.30168	1.94572
3.57333	3.05953	3.21474	5.36279	6.04184		3.57333	2.04406	6.8728	6.29691	1.94663
3.57667	3.06578	3.21826	5.37053	6.04394		3.57667	2.04875	6.87906	6.29695	1.9514
3.58	3.06655	3.22118	5.3655	6.04597		3.58	2.05132	6.87618	6.29886	1.95565
3.58333	3.06961	3.22377	5.37282	6.04633		3.58333	2.0537	6.8799	6.30735	1.9617
3.58667	3.07288	3.23102	5.37017	6.04364		3.58667	2.05559	6.88139	6.3019	1.9646
3.59	3.07781	3.23034	5.3699	6.05228		3.59	2.05846	6.88355	6.29934	1.96921
3.59333	3.08181	3.23128	5.38032	6.04951		3.59333	2.06304	6.87994	6.30613	1.97036
3.59667	3.09094	3.23319	5.37905	6.04755		3.59667	2.06707	6.88452	6.30983	1.97313
3.6	3.08808	3.24027	5.38125	6.05014		3.6	2.07212	6.88263	6.3115	1.9783
3.60333	3.09185	3.2432	5.38604	6.0544		3.60333	2.07655	6.88422	6.31033	1.98428
3.60667	3.09741	3.24344	5.38443	6.05484		3.60667	2.08161	6.88537	6.31335	1.98791
3.61	3.1023	3.24767	5.39218	6.05966		3.61	2.08228	6.88866	6.3096	1.9932
3.61333	3.10502	3.24908	5.39221	6.05887		3.61333	2.08629	6.89013	6.31942	1.9944
3.61667	3.106	3.25634	5.39127	6.05891		3.61667	2.08883	6.89365	6.31669	1.99879
3.62	3.11401	3.26318	5.39596	6.05754		3.62	2.08925	6.89381	6.31869	2.00051
3.62333	3.11486	3.26345	5.39504	6.05902		3.62333	2.09254	6.89428	6.31881	2.00457
3.62667	3.11864	3.26522	5.3989	6.0608		3.62667	2.09675	6.89399	6.31612	2.00651
3.63	3.12307	3.26909	5.40194	6.0711		3.63	2.09978	6.89725	6.32547	2.01356
3.63333	3.12801	3.27603	5.4025	6.06808		3.63333	2.10321	6.90028	6.32296	2.01348
3.63667	3.1261	3.27512	5.40343	6.06435		3.63667	2.10719	6.89567	6.32759	2.0172
3.64	3.13307	3.27893	5.40735	6.06937		3.64	2.1096	6.89957	6.32529	2.02086
3.64333	3.13938	3.28218	5.41221	6.07313		3.64333	2.1112	6.89568	6.32907	2.02522
3.64667	3.14017	3.28928	5.41067	6.07036		3.64667	2.11268	6.90861	6.33011	2.0271
3.65	3.13968	3.28984	5.41233	6.06865		3.65	2.11521	6.9043	6.32992	2.03223
3.65333	3.14854	3.29718	5.41683	6.06981		3.65333	2.1192	6.906	6.33171	2.03651
3.65667	3.14719	3.29442	5.41898	6.07315		3.65667	2.12367	6.91063	6.33543	2.03979
3.66	3.15429	3.30336	5.42107	6.07749		3.66	2.12991	6.91001	6.33642	2.0411
3.66333	3.16129	3.30895	5.42077	6.0728		3.66333	2.13368	6.90678	6.33576	2.04494
3.66667	3.15934	3.30374	5.42101	6.07667		3.66667	2.13621	6.90739	6.33641	2.04885
3.67	3.1626	3.30849	5.42084	6.08256		3.67	2.13782	6.9126	6.34151	2.05182
3.67333	3.16353	3.31648	5.42512	6.08249		3.67333	2.14319	6.90723	6.33996	2.05462
3.67667	3.17322	3.30994	5.42655	6.0817		3.67667	2.14474	6.91287	6.3465	2.05902
3.68	3.17614	3.32148	5.43039	6.08799		3.68	2.14939	6.91165	6.34054	2.06308
3.68333	3.1796	3.32501	5.42799	6.08482		3.68333	2.15383	6.9119	6.34595	2.06689
3.68667	3.18344	3.32347	5.43076	6.08416		3.68667	2.15785	6.91176	6.34769	2.07173
3.69	3.1879	3.32758	5.43445	6.08593		3.69	2.15949	6.91864	6.34766	2.07579
3.69333	3.19097	3.3364	5.43303	6.08282		3.69333	2.1635	6.9203	6.3489	2.08242
3.69667	3.19636	3.33872	5.44002	6.09045		3.69667	2.16559	6.91674	6.35345	2.08693
3.7	3.19516	3.33901	5.443	6.08907		3.7	2.1692	6.92018	6.34989	2.09033
3.70333	3.20726	3.34057	5.44407	6.10096		3.70333	2.17543	6.92037	6.35682	2.09377
3.70667	3.20114	3.34393	5.44587	6.09505		3.70667	2.17977	6.92251	6.35485	2.09878
3.71	3.21134	3.34596	5.44473	6.09599		3.71	2.18469	6.92759	6.35344	2.10017
3.71333	3.2145	3.34879	5.44707	6.09558		3.71333	2.18986	6.92983	6.36197	2.10353
3.71667	3.22015	3.35911	5.45188	6.0998		3.71667	2.19314	6.92765	6.3634	2.10669
3.72	3.21269	3.35404	5.44727	6.10048		3.72	2.19457	6.92477	6.35795	2.10803
3.72333	3.22236	3.3564	5.4517	6.10276		3.72333	2.19658	6.92847	6.36288	2.10937
3.72667	3.22563	3.37011	5.45063	6.10306		3.72667	2.19902	6.93114	6.3664	2.11287
3.73	3.23161	3.36791	5.46087	6.1035		3.73	2.20034	6.93155	6.36652	2.11643
3.73333	3.23257	3.37411	5.46449	6.10683		3.73333	2.20289	6.92915	6.36611	2.12154
3.73667	3.23781	3.37718	5.46381	6.10681		3.73667	2.20455	6.93356	6.37121	2.12519
3.74	3.24268	3.37592	5.45921	6.106		3.74	2.2078	6.93044	6.36963	2.13006
3.74333	3.23833	3.38186	5.46343	6.1068		3.74333	2.20892	6.94022	6.37211	2.13549
3.74667	3.2475	3.38693	5.46521	6.11152		3.74667	2.21124	6.93854	6.36813	2.13778
3.75	3.25134	3.38899	5.46693	6.10873		3.75	2.2153	6.93904	6.36782	2.14126
3.75333	3.24867	3.39322	5.46991	6.11004		3.75333	2.22236	6.93891	6.3735	2.14584
3.75667	3.25857	3.39615	5.47079	6.10936		3.75667	2.22634	6.93816	6.37852	2.15051
3.76	3.25781	3.39754	5.47574	6.11421		3.76	2.23185	6.94085	6.37353	2.15304
3.76333	3.26519	3.39437	5.47903	6.11216		3.76333	2.23679	6.94224	6.37998	2.15752
3.76667	3.26902	3.40742	5.47573	6.11756		3.76667	2.24134	6.94216	6.38205	2.1613
3.77	3.2712	3.4092	5.48228	6.11694		3.77	2.24322	6.94338	6.37993	2.16569
3.77333	3.27515	3.40876	5.48261	6.11916		3.77333	2.24641	6.94429	6.38334	2.16855
3.77667	3.27787	3.41302	5.48241	6.11785		3.77667	2.24813	6.94883	6.38117	2.17254
3.78	3.28279	3.41601	5.48132	6.12217		3.78	2.25042	6.94506	6.38283	2.17604
3.78333	3.28371	3.41958	5.48201	6.12176		3.78333	2.25073	6.94814	6.38526	2.18119
3.78667	3.28736	3.42286	5.48796	6.12676		3.78667	2.25253	6.95259	6.38346	2.18505
3.79	3.29156	3.42827	5.48919	6.1315		3.79	2.25446	6.95256	6.3873	2.18916
3.79333	3.29794	3.43041	5.49074	6.12994		3.79333	2.25985	6.95379	6.38964	2.19264
3.79667	3.2973	3.43666	5.49072	6.13099		3.79667	2.26307	6.95388	6.3963	2.1953
3.8	3.30577	3.43486	5.48793	6.12747		3.8	2.2696	6.95836	6.38975	2.19693
3.80333	3.30316	3.43649	5.49377	6.13205		3.80333	2.2708	6.95384	6.3951	2.20258
3.80667	3.30777	3.44093	5.49542	6.13331		3.80667	2.27361	6.95806	6.39148	2.20558
3.81	3.30883	3.44351	5.49629	6.12753		3.81	2.27536	6.95627	6.39321	2.2087
3.81333	3.31312	3.44847	5.50048	6.1307		3.81333	2.27805	6.95488	6.39928	2.21207
3.81667	3.31856	3.45276	5.50516	6.13464		3.81667	2.27769	6.95978	6.39814	2.21711
3.82	3.32495	3.45467	5.50384	6.13245		3.82	2.28343	6.96383	6.39993	2.21944
3.82333	3.32254	3.45399	5.50624	6.13641		3.82333	2.28979	6.96363	6.40289	2.2243
3.82667	3.32469	3.45929	5.5083	6.13582		3.82667	2.29489	6.96219	6.39895	2.22806
3.83	3.32697	3.46222	5.5059	6.13905		3.83	2.29872	6.96579	6.40861	2.23212
3.83333	3.33296	3.46552	5.50901	6.13897		3.83333	2.30353	6.96054	6.40701	2.23695
3.83667	3.33643	3.47042	5.51637	6.14151		3.83667	2.30586	6.96375	6.40825	2.24046
3.84	3.34195	3.46828	5.51236	6.14103		3.84	2.3104	6.96694	6.40692	2.24136
3.84333	3.34243	3.4787	5.51499	6.14663		3.84333	2.31363	6.97242	6.40879	2.24502
3.84667	3.34518	3.48085	5.51673	6.14477		3.84667	2.31668	6.96972	6.40805	2.24827
3.85	3.3488	3.47427	5.51289	6.14992		3.85	2.31879	6.97219	6.40894	2.25074
3.85333	3.35844	3.48609	5.51421	6.14317		3.85333	2.32394	6.97161	6.41055	2.25089
3.85667	3.3556	3.48789	5.52145	6.15406		3.85667	2.32615	6.97551	6.41264	2.25533
3.86	3.36154	3.49191	5.52597	6.15263		3.86	2.32763	6.97167	6.41428	2.26044
3.86333	3.36307	3.49402	5.52515	6.15301		3.86333	2.33042	6.97335	6.41452	2.26511
3.86667	3.37145	3.49574	5.53228	6.15622		3.86667	2.33359	6.97621	6.41354	2.26935
3.87	3.3724	3.5016	5.52613	6.15534		3.87	2.33543	6.97715	6.42053	2.27541
3.87333	3.37374	3.50426	5.5269	6.15133		3.87333	2.33733	6.97653	6.41936	2.2806
3.87667	3.37593	3.50355	5.53642	6.15333		3.87667	2.34066	6.98064	6.41782	2.28386
3.88	3.37681	3.50751	5.53309	6.16085		3.88	2.34434	6.97548	6.42234	2.2873
3.88333	3.38328	3.51553	5.53098	6.15722		3.88333	2.34815	6.97831	6.42681	2.29274
3.88667	3.38908	3.51124	5.53663	6.15872		3.88667	2.35083	6.98314	6.42133	2.29652
3.89	3.39016	3.51635	5.5376	6.16271		3.89	2.35426	6.98397	6.42618	2.29831
3.89333	3.39403	3.51971	5.53791	6.1672		3.89333	2.35785	6.98558	6.42711	2.30083
3.89667	3.40046	3.52452	5.53719	6.16344		3.89667	2.36019	6.98163	6.42937	2.30611
3.9	3.40692	3.52103	5.54168	6.16593		3.9	2.36562	6.98517	6.42845	2.30965
3.90333	3.40456	3.52652	5.5419	6.16505		3.90333	2.37019	6.98694	6.43032	2.31499
3.90667	3.40829	3.53478	5.54442	6.16977		3.90667	2.37404	6.99433	6.42909	2.3193
3.91	3.41059	3.53227	5.54839	6.16767		3.91	2.37826	6.99097	6.43611	2.32234
3.91333	3.41084	3.5433	5.5509	6.1664		3.91333	2.38501	6.99764	6.43441	2.32478
3.91667	3.421	3.54209	5.54782	6.16961		3.91667	2.38722	6.99534	6.4293	2.32694
3.92	3.4213	3.54087	5.5493	6.17261		3.92	2.39012	6.99413	6.43673	2.33029
3.92333	3.42051	3.54765	5.54808	6.1794		3.92333	2.39387	6.99375	6.44093	2.33474
3.92667	3.43235	3.54827	5.55167	6.1754		3.92667	2.39837	6.99862	6.44342	2.33879
3.93	3.4284	3.55189	5.55539	6.17637		3.93	2.39912	6.99599	6.43766	2.3429
3.93333	3.43506	3.55718	5.55178	6.17513		3.93333	2.40165	7.00027	6.43963	2.34915
3.93667	3.43977	3.56244	5.55747	6.17746		3.93667	2.40413	6.99981	6.44083	2.35163
3.94	3.43792	3.56193	5.55949	6.17577		3.94	2.40852	7.00016	6.44094	2.35562
3.94333	3.44179	3.57173	5.55917	6.17824		3.94333	2.40933	7.00721	6.44401	2.35817
3.94667	3.44272	3.57344	5.55777	6.18024		3.94667	2.41301	7.00252	6.44692	2.35955
3.95	3.4469	3.56768	5.56195	6.17883		3.95	2.41648	7.00252	6.44852	2.36021
3.95333	3.45205	3.57322	5.57086	6.1851		3.95333	2.42076	7.00386	6.45126	2.36511
3.95667	3.45432	3.57343	5.56232	6.18346		3.95667	2.42306	7.00317	6.44424	2.36841
3.96	3.4607	3.57912	5.56982	6.18212		3.96	2.42617	7.00339	6.45185	2.37267
3.96333	3.46131	3.58012	5.56791	6.18592		3.96333	2.42801	7.00993	6.45427	2.37713
3.96667	3.45958	3.58668	5.57152	6.18588		3.96667	2.4311	7.00355	6.45501	2.3833
3.97	3.46744	3.5882	5.5728	6.1841		3.97	2.4341	7.01012	6.45531	2.38508
3.97333	3.46825	3.59126	5.57454	6.18813		3.97333	2.43617	7.00881	6.45119	2.38909
3.97667	3.47177	3.59441	5.5787	6.18891		3.97667	2.43963	7.00859	6.45594	2.39414
3.98	3.47692	3.59866	5.57646	6.18892		3.98	2.44334	7.00998	6.45771	2.39833
3.98333	3.4777	3.59854	5.57898	6.1987		3.98333	2.44682	7.01026	6.46105	2.39939
3.98667	3.48065	3.60286	5.57832	6.19054		3.98667	2.44827	7.01271	6.45726	2.40389
3.99	3.48414	3.60157	5.57637	6.19459		3.99	2.45175	7.01452	6.46293	2.40844
3.99333	3.48847	3.61277	5.58462	6.19731		3.99333	2.45462	7.01674	6.46299	2.41295
3.99667	3.49261	3.61149	5.58112	6.19289		3.99667	2.45624	7.01547	6.4581	2.41685
4	3.49747	3.61381	5.58369	6.19514		4	2.45772	7.01593	6.45655	2.42326
4.00333	3.49362	3.61437	5.5854	6.19928		4.00333	2.4609	7.01461	6.46143	2.42775
4.00667	3.49909	3.61983	5.58878	6.20283		4.00667	2.46426	7.01783	6.46549	2.43084
4.01	3.51023	3.62041	5.5866	6.2049		4.01	2.4683	7.02202	6.46957	2.43276
4.01333	3.50392	3.62084	5.59366	6.20647		4.01333	2.47373	7.01952	6.47294	2.43621
4.01667	3.51198	3.62637	5.589	6.20624		4.01667	2.47793	7.02183	6.47121	2.43946
4.02	3.51722	3.63419	5.59374	6.20115		4.02	2.48325	7.02161	6.46754	2.44416
4.02333	3.51735	3.63325	5.59376	6.20533		4.02333	2.48786	7.02339	6.47349	2.44677
4.02667	3.51749	3.63689	5.59716	6.20882		4.02667	2.49123	7.02422	6.47298	2.44978
4.03	3.52068	3.63936	5.59506	6.20441		4.03	2.4953	7.02445	6.4708	2.45211
4.03333	3.52046	3.63993	5.59831	6.20496		4.03333	2.49931	7.02683	6.47519	2.45504
4.03667	3.53154	3.64425	5.60401	6.21449		4.03667	2.50155	7.02305	6.47648	2.45727
4.04	3.53121	3.6481	5.60449	6.2124		4.04	2.50374	7.03245	6.47947	2.4591
4.04333	3.53508	3.65242	5.61135	6.21162		4.04333	2.50731	7.0338	6.48337	2.46313
4.04667	3.54011	3.65729	5.60378	6.2104		4.04667	2.50759	7.02702	6.48007	2.46671
4.05	3.53971	3.65393	5.60019	6.21328		4.05	2.51027	7.03097	6.47689	2.47238
4.05333	3.54032	3.66077	5.60943	6.21512		4.05333	2.51235	7.03228	6.48418	2.47394
4.05667	3.54262	3.65724	5.60769	6.21794		4.05667	2.51679	7.03262	6.47984	2.48024
4.06	3.541	3.66593	5.60602	6.2165		4.06	2.51935	7.03358	6.48656	2.48291
4.06333	3.55592	3.66608	5.6136	6.21721		4.06333	2.52536	7.03437	6.48183	2.48767
4.06667	3.55066	3.6674	5.61356	6.21673		4.06667	2.52771	7.03175	6.48449	2.49081
4.07	3.56259	3.67876	5.6105	6.22243		4.07	2.531	7.04316	6.48255	2.49522
4.07333	3.56247	3.67759	5.60903	6.22197		4.07333	2.53432	7.03761	6.48693	2.49821
4.07667	3.56118	3.68021	5.61692	6.22316		4.07667	2.53747	7.03602	6.48578	2.50468
4.08	3.56657	3.67746	5.61793	6.22516		4.08	2.53922	7.03863	6.48724	2.50731
4.08333	3.57208	3.6794	5.61788	6.22426		4.08333	2.54218	7.03902	6.49115	2.51125
4.08667	3.57475	3.6849	5.61868	6.22402		4.08667	2.54627	7.04432	6.49302	2.51608
4.09	3.57444	3.68592	5.6292	6.2274		4.09	2.54923	7.04084	6.49019	2.51803
4.09333	3.58167	3.69325	5.62158	6.22238		4.09333	2.55221	7.04437	6.49372	2.52083
4.09667	3.5886	3.69088	5.62336	6.22787		4.09667	2.55453	7.04325	6.49621	2.52499
4.1	3.58406	3.70229	5.62504	6.23202		4.1	2.5567	7.04683	6.49568	2.52715
4.10333	3.58961	3.69967	5.62612	6.2257		4.10333	2.55882	7.04537	6.50031	2.52929
4.10667	3.58758	3.70259	5.63427	6.23312		4.10667	2.56021	7.04782	6.50118	2.53309
4.11	3.59524	3.70393	5.62905	6.23467		4.11	2.56262	7.04565	6.50027	2.53598
4.11333	3.59737	3.71048	5.63115	6.23385		4.11333	2.56718	7.04939	6.49903	2.54058
4.11667	3.59759	3.71231	5.63387	6.23143		4.11667	2.57191	7.04375	6.50135	2.54544
4.12	3.60156	3.71117	5.63156	6.23473		4.12	2.5753	7.05297	6.49993	2.54955
4.12333	3.60607	3.71681	5.6319	6.23383		4.12333	2.57944	7.0524	6.50553	2.55538
4.12667	3.60883	3.72778	5.63263	6.23801		4.12667	2.5835	7.05343	6.50605	2.55924
4.13	3.60729	3.72005	5.63915	6.23726		4.13	2.58371	7.05293	6.50535	2.56085
4.13333	3.61355	3.73117	5.63269	6.23634		4.13333	2.58629	7.05456	6.50643	2.5653
4.13667	3.61677	3.72727	5.63781	6.2409		4.13667	2.5894	7.05745	6.51052	2.56919
4.14	3.62235	3.72776	5.63924	6.2436		4.14	2.59048	7.05465	6.5123	2.57161
4.14333	3.6209	3.73489	5.63461	6.24096		4.14333	2.59376	7.05766	6.51115	2.57438
4.14667	3.62906	3.73348	5.63991	6.24193		4.14667	2.59951	7.06001	6.51244	2.57734
4.15	3.6254	3.73722	5.64565	6.24179		4.15	2.60287	7.06169	6.51237	2.58094
4.15333	3.62922	3.74194	5.64742	6.24568		4.15333	2.6066	7.05634	6.5113	2.58586
4.15667	3.63468	3.74623	5.6456	6.24825		4.15667	2.61254	7.06729	6.51966	2.58854
4.16	3.6328	3.74593	5.64791	6.24773		4.16	2.61515	7.0652	6.5144	2.59083
4.16333	3.64089	3.74735	5.65267	6.24451		4.16333	2.61677	7.05822	6.51652	2.59635
4.16667	3.64324	3.75238	5.65237	6.24961		4.16667	2.61932	7.06522	6.51785	2.59924
4.17	3.64757	3.75329	5.65442	6.24556		4.17	2.62046	7.06372	6.52071	2.60311
4.17333	3.64382	3.75838	5.65525	6.24713		4.17333	2.62397	7.06171	6.51938	2.60661
4.17667	3.64932	3.75959	5.65307	6.25026		4.17667	2.62685	7.0654	6.52246	2.61187
4.18	3.64936	3.75923	5.65527	6.25413		4.18	2.62944	7.066	6.52286	2.61352
4.18333	3.65793	3.76202	5.65526	6.25418		4.18333	2.63152	7.06743	6.52886	2.61674
4.18667	3.66212	3.76587	5.65383	6.25315		4.18667	2.63576	7.06925	6.52304	2.62035
4.19	3.66181	3.77718	5.65955	6.26233		4.19	2.63758	7.06762	6.52737	2.62315
4.19333	3.65922	3.76842	5.65717	6.25253		4.19333	2.64046	7.07102	6.52972	2.62763
4.19667	3.66661	3.77303	5.65325	6.26174		4.19667	2.64363	7.0734	6.53123	2.63247
4.2	3.66766	3.77684	5.66116	6.25745		4.2	2.64824	7.06606	6.52229	2.63656
4.20333	3.67312	3.78091	5.66362	6.2643		4.20333	2.6516	7.07357	6.52656	2.64049
4.20667	3.67648	3.78732	5.66527	6.26261		4.20667	2.6557	7.07246	6.53107	2.6441
4.21	3.67738	3.78171	5.66282	6.26105		4.21	2.65856	7.07464	6.53686	2.64594
4.21333	3.6835	3.7894	5.66752	6.26081		4.21333	2.66296	7.07625	6.52822	2.6478
4.21667	3.68201	3.79187	5.66539	6.26222		4.21667	2.66408	7.07864	6.53055	2.65027
4.22	3.68779	3.79488	5.66978	6.26654		4.22	2.66568	7.07554	6.53723	2.65472
4.22333	3.68633	3.79375	5.6689	6.2699		4.22333	2.66773	7.07774	6.53469	2.65948
4.22667	3.69366	3.79897	5.66977	6.2616		4.22667	2.67013	7.07716	6.53475	2.66389
4.23	3.69286	3.80056	5.67188	6.26714		4.23	2.67152	7.08258	6.53613	2.67017
4.23333	3.69386	3.80536	5.67184	6.27095		4.23333	2.67636	7.08169	6.5407	2.6751
4.23667	3.70282	3.80368	5.67816	6.27303		4.23667	2.67901	7.08732	6.53974	2.6788
4.24	3.70528	3.81113	5.67387	6.26745		4.24	2.6832	7.08424	6.54242	2.68249
4.24333	3.70349	3.80978	5.67887	6.27289		4.24333	2.68647	7.08571	6.54075	2.68444
4.24667	3.70989	3.80935	5.68223	6.27488		4.24667	2.69026	7.08351	6.53628	2.68511
4.25	3.71264	3.81935	5.67759	6.26945		4.25	2.69168	7.09199	6.54697	2.6881
4.25333	3.71098	3.81459	5.67561	6.27388		4.25333	2.6953	7.08886	6.54135	2.68978
4.25667	3.71649	3.81907	5.68718	6.27645		4.25667	2.6998	7.08965	6.54642	2.6928
4.26	3.72451	3.82489	5.68143	6.27481		4.26	2.70232	7.09117	6.545	2.6972
4.26333	3.72356	3.82367	5.68777	6.27933		4.26333	2.70435	7.09022	6.54783	2.70253
4.26667	3.72423	3.82355	5.68565	6.27965		4.26667	2.70691	7.08983	6.54985	2.70724
4.27	3.72275	3.82526	5.68881	6.28008		4.27	2.70914	7.09257	6.54786	2.71054
4.27333	3.72572	3.83219	5.69124	6.27569		4.27333	2.71163	7.09422	6.54596	2.71473
4.27667	3.73036	3.83089	5.68615	6.27495		4.27667	2.71495	7.08923	6.55145	2.71816
4.28	3.72942	3.83822	5.68911	6.27792		4.28	2.71777	7.09049	6.55667	2.72011
4.28333	3.73484	3.84006	5.69327	6.28616		4.28333	2.7207	7.09509	6.5574	2.72411
4.28667	3.73867	3.84482	5.69596	6.28336		4.28667	2.72353	7.09597	6.55054	2.72839
4.29	3.74452	3.844	5.6996	6.28728		4.29	2.7273	7.09474	6.55567	2.73075
4.29333	3.74316	3.8439	5.69672	6.28754		4.29333	2.73106	7.09689	6.5555	2.73355
4.29667	3.74553	3.84281	5.69893	6.2889		4.29667	2.73316	7.09538	6.55695	2.73851
4.3	3.74942	3.8578	5.69758	6.28605		4.3	2.73648	7.10089	6.558	2.74309
4.30333	3.75372	3.85286	5.69801	6.29115		4.30333	2.74144	7.0952	6.55524	2.74718
4.30667	3.75123	3.85797	5.70268	6.28964		4.30667	2.74424	7.10108	6.55856	2.75131
4.31	3.75711	3.85995	5.70036	6.2897		4.31	2.74704	7.10455	6.56026	2.75714
4.31333	3.75522	3.86282	5.69745	6.29327		4.31333	2.74973	7.10209	6.56385	2.76027
4.31667	3.76308	3.86283	5.70554	6.2933		4.31667	2.75416	7.09514	6.55764	2.76233
4.32	3.76564	3.86212	5.70353	6.29088		4.32	2.75667	7.10367	6.56186	2.76581
4.32333	3.77285	3.86959	5.7041	6.29561		4.32333	2.7591	7.10524	6.564	2.76854
4.32667	3.76887	3.87542	5.70375	6.29232		4.32667	2.7618	7.10354	6.56803	2.76967
4.33	3.77329	3.87235	5.70166	6.29217		4.33	2.76615	7.10536	6.56312	2.77304
4.33333	3.77315	3.87445	5.70649	6.29397		4.33333	2.76786	7.10968	6.56659	2.77629
4.33667	3.77906	3.87829	5.70839	6.29116		4.33667	2.77125	7.10662	6.57002	2.77714
4.34	3.78115	3.88178	5.71186	6.29847		4.34	2.77574	7.10924	6.57394	2.78087
4.34333	3.78427	3.88356	5.70533	6.29799		4.34333	2.77851	7.11199	6.57097	2.78553
4.34667	3.78682	3.87905	5.70924	6.29828		4.34667	2.78152	7.11102	6.57081	2.78819
4.35	3.79193	3.88728	5.71315	6.30283		4.35	2.78473	7.10664	6.57312	2.79276
4.35333	3.79584	3.88757	5.71672	6.30404		4.35333	2.78828	7.11271	6.57234	2.8
4.35667	3.79463	3.89357	5.71793	6.30311		4.35667	2.78925	7.11158	6.57243	2.80325
4.36	3.79375	3.89105	5.71528	6.3037		4.36	2.7919	7.11347	6.57154	2.80635
4.36333	3.80138	3.89804	5.72002	6.30353		4.36333	2.79655	7.1162	6.57481	2.81062
4.36667	3.7995	3.89996	5.71807	6.30551		4.36667	2.80043	7.11458	6.57576	2.81059
4.37	3.80424	3.90009	5.71783	6.31366		4.37	2.79976	7.12122	6.57842	2.81433
4.37333	3.80832	3.90271	5.72122	6.31016		4.37333	2.80202	7.1132	6.57706	2.81912
4.37667	3.81007	3.90435	5.71802	6.30955		4.37667	2.80444	7.11804	6.58112	2.82037
4.38	3.80849	3.90762	5.7256	6.31049		4.38	2.80677	7.11983	6.58132	2.82383
4.38333	3.81423	3.91365	5.72105	6.30374		4.38333	2.80865	7.12237	6.58159	2.83097
4.38667	3.81829	3.91745	5.72408	6.31089		4.38667	2.8136	7.11993	6.58357	2.83263
4.39	3.81507	3.91777	5.72898	6.31151		4.39	2.81887	7.12123	6.58483	2.83552
4.39333	3.82115	3.91931	5.72487	6.31485		4.39333	2.82183	7.11771	6.58853	2.84015
4.39667	3.82479	3.91727	5.72521	6.31048		4.39667	2.82362	7.12111	6.59174	2.84208
4.4	3.82898	3.92157	5.73205	6.31506		4.4	2.8269	7.12382	6.58733	2.84336
4.40333	3.82788	3.92192	5.73291	6.32163		4.40333	2.82927	7.12291	6.58442	2.84805
4.40667	3.83367	3.92763	5.72855	6.31521		4.40667	2.8323	7.12502	6.59053	2.84907
4.41	3.83025	3.92482	5.73264	6.31282		4.41	2.8368	7.12462	6.59359	2.8521
4.41333	3.83541	3.93098	5.73303	6.3185		4.41333	2.83843	7.12508	6.58943	2.85591
4.41667	3.83796	3.9296	5.73007	6.31928		4.41667	2.84059	7.12699	6.58857	2.85902
4.42	3.84884	3.9373	5.73738	6.3187		4.42	2.84183	7.12778	6.58893	2.86154
4.42333	3.84125	3.9345	5.73579	6.32055		4.42333	2.84384	7.12904	6.59952	2.86746
4.42667	3.84465	3.93718	5.73229	6.32326		4.42667	2.84632	7.13332	6.5948	2.87158
4.43	3.85051	3.93947	5.73708	6.32267		4.43	2.85064	7.1286	6.59325	2.87729
4.43333	3.85066	3.94463	5.7374	6.3268		4.43333	2.85274	7.12976	6.5956	2.88201
4.43667	3.85074	3.9513	5.73711	6.32418		4.43667	2.85879	7.12949	6.59522	2.88582
4.44	3.85595	3.94446	5.74377	6.32427		4.44	2.86425	7.13377	6.59961	2.88815
4.44333	3.85706	3.95213	5.74185	6.32493		4.44333	2.86568	7.14027	6.59644	2.89173
4.44667	3.86359	3.9502	5.74167	6.32945		4.44667	2.87023	7.13671	6.59878	2.89409
4.45	3.86563	3.95715	5.74897	6.32323		4.45	2.87345	7.13596	6.59819	2.89694
4.45333	3.86504	3.95772	5.75011	6.32523		4.45333	2.87553	7.13575	6.60353	2.89994
4.45667	3.86253	3.96349	5.74866	6.33356		4.45667	2.87665	7.13981	6.59757	2.90427
4.46	3.87081	3.96611	5.74959	6.32865		4.46	2.88043	7.1385	6.60291	2.90615
4.46333	3.86997	3.96504	5.75119	6.32868		4.46333	2.88048	7.14039	6.60526	2.90913
4.46667	3.87527	3.96623	5.75002	6.32804		4.46667	2.88278	7.14323	6.60448	2.91156
4.47	3.88006	3.97045	5.75378	6.33496		4.47	2.88535	7.13875	6.6032	2.91659
4.47333	3.87749	3.96913	5.7539	6.33735		4.47333	2.88742	7.13939	6.6022	2.91876
4.47667	3.87668	3.97519	5.75232	6.331		4.47667	2.89	7.14041	6.60475	2.92356
4.48	3.88531	3.97432	5.7559	6.33989		4.48	2.89514	7.14874	6.60769	2.92687
4.48333	3.8904	3.98066	5.75469	6.33457		4.48333	2.89908	7.14042	6.61345	2.93028
4.48667	3.88917	3.98317	5.76069	6.33647		4.48667	2.90143	7.14262	6.61009	2.93301
4.49	3.89252	3.97791	5.75906	6.33731		4.49	2.90648	7.14511	6.61326	2.9364
4.49333	3.89273	3.98524	5.76655	6.33856		4.49333	2.90964	7.14445	6.61301	2.93913
4.49667	3.89494	3.98548	5.76064	6.34389		4.49667	2.90998	7.14851	6.60999	2.944
4.5	3.89765	3.99185	5.75931	6.34249		4.5	2.91297	7.14738	6.60743	2.94941
4.50333	3.89856	3.99747	5.75992	6.34179		4.50333	2.9158	7.14756	6.61545	2.95237
4.50667	3.89852	3.98851	5.76171	6.34395		4.50667	2.91946	7.15028	6.6165	2.95655
4.51	3.90421	4.00098	5.76118	6.34265		4.51	2.92162	7.14925	6.61901	2.96008
4.51333	3.9096	3.99426	5.7663	6.33941		4.51333	2.92579	7.14746	6.61213	2.96204
4.51667	3.90631	3.999	5.76547	6.34608		4.51667	2.92892	7.14972	6.61637	2.96267
4.52	3.9124	4.00434	5.76798	6.34736		4.52	2.93215	7.15125	6.61682	2.96845
4.52333	3.91051	4.00656	5.76636	6.34956		4.52333	2.93443	7.15448	6.62084	2.97183
4.52667	3.91648	4.00736	5.77168	6.34482		4.52667	2.93759	7.15659	6.62525	2.97459
4.53	3.91766	4.00793	5.77175	6.34607		4.53	2.93862	7.155	6.6274	2.97917
4.53333	3.91886	4.00676	5.76487	6.34718		4.53333	2.94132	7.15434	6.62389	2.98289
4.53667	3.92051	4.01252	5.76946	6.34351		4.53667	2.94198	7.15566	6.62053	2.98282
4.54	3.92596	4.01491	5.77151	6.35476		4.54	2.94572	7.15801	6.6238	2.98477
4.54333	3.92617	4.0228	5.77701	6.34837		4.54333	2.94993	7.15786	6.62625	2.98879
4.54667	3.92557	4.01866	5.77165	6.35447		4.54667	2.95372	7.16046	6.63136	2.99012
4.55	3.9314	4.02013	5.77912	6.35637		4.55	2.95624	7.16038	6.62813	2.99498
4.55333	3.93306	4.02639	5.77615	6.35882		4.55333	2.96144	7.16037	6.62964	3.00148
4.55667	3.93476	4.02864	5.7794	6.35851		4.55667	2.96313	7.16207	6.63544	3.00547
4.56	3.93702	4.02795	5.78264	6.35473		4.56	2.9655	7.1616	6.62726	3.00975
4.56333	3.94423	4.03496	5.78064	6.35564		4.56333	2.96861	7.15713	6.62909	3.01367
4.56667	3.94123	4.03159	5.78305	6.35333		4.56667	2.9709	7.16247	6.62743	3.01627
4.57	3.94192	4.03715	5.78152	6.35959		4.57	2.97187	7.16351	6.6319	3.01923
4.57333	3.94881	4.03235	5.77994	6.36069		4.57333	2.97409	7.16062	6.63218	3.02321
4.57667	3.94877	4.04216	5.78594	6.35582		4.57667	2.97582	7.16571	6.63386	3.02537
4.58	3.95394	4.03914	5.78035	6.36051		4.58	2.97959	7.16688	6.63701	3.02871
4.58333	3.9575	4.04676	5.78437	6.362		4.58333	2.98327	7.16384	6.64019	3.03114
4.58667	3.95579	4.0465	5.79176	6.36156		4.58667	2.98788	7.16589	6.63781	3.03561
4.59	3.95581	4.05263	5.79017	6.36627		4.59	2.99221	7.16581	6.62927	3.03826
4.59333	3.95792	4.04926	5.78666	6.36709		4.59333	2.99641	7.17463	6.64186	3.04083
4.59667	3.96396	4.05057	5.78822	6.36238		4.59667	2.99662	7.16475	6.63734	3.04369
4.6	3.96478	4.04962	5.79123	6.36925		4.6	2.99864	7.16976	6.64265	3.04865
4.60333	3.96666	4.05643	5.79646	6.36131		4.60333	3.00047	7.16923	6.63955	3.04924
4.60667	3.96719	4.05408	5.78709	6.36404		4.60667	3.00325	7.16908	6.64117	3.05306
4.61	3.97018	4.05843	5.79422	6.36969		4.61	3.00332	7.1755	6.63884	3.05779
4.61333	3.97088	4.05918	5.79512	6.37004		4.61333	3.00863	7.17031	6.64361	3.06254
4.61667	3.97275	4.06482	5.79376	6.37309		4.61667	3.01205	7.17551	6.64357	3.06361
4.62	3.97968	4.06667	5.79798	6.36945		4.62	3.01594	7.17408	6.63882	3.06997
4.62333	3.98141	4.06695	5.79869	6.37805		4.62333	3.01869	7.17249	6.6459	3.0739
4.62667	3.9832	4.06995	5.80237	6.3716		4.62667	3.02116	7.17243	6.64664	3.07672
4.63	3.98071	4.06674	5.80056	6.37268		4.63	3.02283	7.17937	6.65228	3.07958
4.63333	3.98371	4.07314	5.79904	6.37279		4.63333	3.02603	7.17855	6.65126	3.08369
4.63667	3.98497	4.06973	5.80087	6.37351		4.63667	3.02701	7.18005	6.64431	3.08587
4.64	3.98618	4.08024	5.79985	6.37759		4.64	3.02969	7.1795	6.65024	3.08629
4.64333	3.99172	4.07849	5.80252	6.37553		4.64333	3.03298	7.17569	6.65218	3.08971
4.64667	3.99623	4.08273	5.80456	6.37971		4.64667	3.03567	7.18538	6.65415	3.09155
4.65	3.99728	4.08554	5.80027	6.37562		4.65	3.03625	7.18152	6.65145	3.0962
4.65333	4.00076	4.08503	5.80773	6.37718		4.65333	3.03914	7.18248	6.65702	3.09903
4.65667	4.00053	4.08673	5.80657	6.38126		4.65667	3.04353	7.18169	6.65512	3.10459
4.66	4.00522	4.08502	5.80998	6.37971		4.66	3.04816	7.17982	6.65561	3.10713
4.66333	4.00319	4.08909	5.80618	6.38007		4.66333	3.05116	7.1845	6.65412	3.11127
4.66667	4.00909	4.09351	5.80763	6.38567		4.66667	3.05466	7.18798	6.65318	3.11242
4.67	4.00796	4.09279	5.8105	6.38154		4.67	3.05845	7.18487	6.6592	3.11717
4.67333	4.01358	4.0997	5.80837	6.38256		4.67333	3.06086	7.18542	6.65811	3.12091
4.67667	4.01626	4.1042	5.81189	6.38325		4.67667	3.0634	7.18524	6.65918	3.12534
4.68	4.01759	4.10311	5.8122	6.38629		4.68	3.06464	7.19077	6.6629	3.12755
4.68333	4.01866	4.10526	5.81022	6.39067		4.68333	3.06819	7.19048	6.66089	3.13197
4.68667	4.01812	4.10846	5.81432	6.38548		4.68667	3.07109	7.19167	6.66157	3.13579
4.69	4.02534	4.10807	5.81588	6.38809		4.69	3.07423	7.19057	6.66555	3.13658
4.69333	4.02549	4.10645	5.81756	6.38581		4.69333	3.07534	7.18959	6.66219	3.14018
4.69667	4.02944	4.11302	5.81587	6.38814		4.69667	3.07858	7.18658	6.66357	3.14383
4.7	4.03093	4.11329	5.81782	6.39337		4.7	3.08028	7.19041	6.66407	3.14645
4.70333	4.02794	4.11435	5.81918	6.39529		4.70333	3.0815	7.19249	6.67347	3.14813
4.70667	4.02927	4.11865	5.81771	6.3898		4.70667	3.0855	7.19883	6.66217	3.15147
4.71	4.03457	4.11872	5.82073	6.39467		4.71	3.08765	7.19697	6.66842	3.15288
4.71333	4.03439	4.12517	5.82533	6.39073		4.71333	3.09069	7.19392	6.66429	3.15697
4.71667	4.03755	4.11999	5.8241	6.3984		4.71667	3.09541	7.19695	6.66777	3.16147
4.72	4.04084	4.12202	5.82243	6.39654		4.72	3.10066	7.19208	6.66888	3.16565
4.72333	4.04394	4.12516	5.82246	6.39716		4.72333	3.09984	7.19726	6.67101	3.17226
4.72667	4.04611	4.12749	5.82725	6.39288		4.72667	3.10379	7.1987	6.67513	3.17706
4.73	4.05098	4.13237	5.8258	6.39679		4.73	3.10803	7.19703	6.67395	3.17993
4.73333	4.04612	4.129	5.82456	6.39833		4.73333	3.10922	7.19758	6.67518	3.18173
4.73667	4.05135	4.13303	5.82692	6.39841		4.73667	3.11061	7.20201	6.67443	3.18569
4.74	4.0573	4.13152	5.83019	6.39803		4.74	3.11446	7.20207	6.67263	3.1848
4.74333	4.05399	4.13877	5.82539	6.39808		4.74333	3.11732	7.20456	6.67763	3.18639
4.74667	4.05519	4.13903	5.82897	6.39898		4.74667	3.11862	7.20617	6.67962	3.18851
4.75	4.05931	4.14371	5.82966	6.40405		4.75	3.12122	7.20198	6.67622	3.19173
4.75333	4.06166	4.14368	5.83289	6.3996		4.75333	3.12466	7.20093	6.67769	3.19237
4.75667	4.06303	4.14452	5.82994	6.40736		4.75667	3.12586	7.20357	6.67976	3.19715
4.76	4.06631	4.1476	5.83761	6.40386		4.76	3.12627	7.20657	6.68611	3.20092
4.76333	4.07021	4.14795	5.83533	6.40678		4.76333	3.12907	7.20626	6.6817	3.20382
4.76667	4.06692	4.15408	5.83672	6.40759		4.76667	3.1315	7.20737	6.67847	3.20565
4.77	4.06953	4.15883	5.83706	6.40792		4.77	3.13394	7.21023	6.68206	3.21143
4.77333	4.07047	4.15385	5.84076	6.41463		4.77333	3.1383	7.20522	6.68468	3.21453
4.77667	4.07619	4.15524	5.84075	6.40987		4.77667	3.14302	7.20269	6.682	3.21697
4.78	4.07531	4.15855	5.8418	6.40744		4.78	3.14466	7.21311	6.68746	3.22205
4.78333	4.07718	4.1629	5.83962	6.40558		4.78333	3.14645	7.20833	6.68263	3.22715
4.78667	4.08053	4.15884	5.8423	6.41105		4.78667	3.14897	7.21209	6.68787	3.23304
4.79	4.08143	4.16029	5.84422	6.41464		4.79	3.15222	7.20959	6.68825	3.23593
4.79333	4.08105	4.16423	5.83984	6.40945		4.79333	3.15424	7.21207	6.68809	3.23937
4.79667	4.08704	4.16714	5.84536	6.41754		4.79667	3.1561	7.21659	6.68926	3.24049
4.8	4.09081	4.16786	5.84685	6.41558		4.8	3.15961	7.21463	6.6924	3.24363
4.80333	4.09083	4.17142	5.84185	6.41465		4.80333	3.16042	7.21392	6.68888	3.24352
4.80667	4.09244	4.1718	5.84395	6.41748		4.80667	3.16239	7.21256	6.69507	3.24709
4.81	4.09063	4.17534	5.85022	6.4176		4.81	3.16584	7.21714	6.69087	3.24964
4.81333	4.09778	4.17946	5.84749	6.4273		4.81333	3.17003	7.21588	6.69349	3.25494
4.81667	4.09487	4.18142	5.84741	6.4164		4.81667	3.1732	7.21632	6.68965	3.2568
4.82	4.09878	4.18156	5.8512	6.41645		4.82	3.17918	7.21776	6.69994	3.26186
4.82333	4.09915	4.18167	5.85182	6.42164		4.82333	3.18336	7.2182	6.69701	3.26455
4.82667	4.10082	4.18708	5.85518	6.42083		4.82667	3.18577	7.22045	6.69869	3.26873
4.83	4.10339	4.18248	5.85284	6.42307		4.83	3.18951	7.22315	6.6975	3.26956
4.83333	4.10939	4.18774	5.85289	6.42262		4.83333	3.19004	7.2259	6.70291	3.27177
4.83667	4.10777	4.19117	5.85784	6.43322		4.83667	3.19187	7.22254	6.69914	3.27443
4.84	4.11588	4.18942	5.85325	6.4206		4.84	3.19337	7.22258	6.70084	3.27823
4.84333	4.11003	4.19035	5.8529	6.43057		4.84333	3.19603	7.22219	6.7019	3.28258
4.84667	4.11935	4.19648	5.86198	6.42625		4.84667	3.1985	7.22449	6.70394	3.2879
4.85	4.11306	4.19461	5.85638	6.42452		4.85	3.20385	7.2213	6.70326	3.29374
4.85333	4.12214	4.19333	5.86341	6.42769		4.85333	3.20707	7.22187	6.70494	3.29869
4.85667	4.11746	4.20226	5.86365	6.42923		4.85667	3.20889	7.22596	6.70569	3.30186
4.86	4.1246	4.20542	5.86017	6.4288		4.86	3.21194	7.22634	6.70236	3.30485
4.86333	4.12598	4.20487	5.86514	6.42796		4.86333	3.21455	7.226	6.70917	3.30671
4.86667	4.12646	4.20661	5.8628	6.42979		4.86667	3.21492	7.232	6.71194	3.30955
4.87	4.12561	4.20842	5.86678	6.42655		4.87	3.21426	7.23302	6.70874	3.31021
4.87333	4.12753	4.20512	5.86581	6.4296		4.87333	3.21782	7.22734	6.70509	3.31433
4.87667	4.13337	4.21172	5.86418	6.42491		4.87667	3.22098	7.23011	6.70701	3.31623
4.88	4.12855	4.21421	5.86532	6.43702		4.88	3.22359	7.22819	6.70978	3.31907
4.88333	4.13343	4.21561	5.86815	6.43059		4.88333	3.22644	7.23326	6.71092	3.32234
4.88667	4.13131	4.21673	5.86895	6.43488		4.88667	3.23181	7.23	6.71549	3.3271
4.89	4.13738	4.22308	5.87221	6.43921		4.89	3.23477	7.23439	6.71058	3.32817
4.89333	4.13735	4.21985	5.86785	6.43711		4.89333	3.23642	7.2372	6.71323	3.33208
4.89667	4.1433	4.22316	5.86911	6.4364		4.89667	3.23697	7.23039	6.71674	3.33551
4.9	4.13849	4.22373	5.86689	6.4355		4.9	3.23971	7.23669	6.71424	3.33754
4.90333	4.14612	4.22303	5.87602	6.43788		4.90333	3.24267	7.23684	6.71929	3.34188
4.90667	4.15366	4.22353	5.87023	6.43697		4.90667	3.24542	7.23427	6.71836	3.3444
4.91	4.15086	4.23228	5.86985	6.44049		4.91	3.24591	7.24179	6.71671	3.34695
4.91333	4.15174	4.23202	5.87396	6.44547		4.91333	3.24822	7.23388	6.71559	3.35057
4.91667	4.15383	4.23323	5.87457	6.43531		4.91667	3.24964	7.23668	6.71539	3.35252
4.92	4.15472	4.23416	5.87413	6.4433		4.92	3.25006	7.23964	6.7196	3.35446
4.92333	4.161	4.23881	5.87747	6.44284		4.92333	3.25289	7.23949	6.72597	3.35807
4.92667	4.15995	4.23415	5.88033	6.44767		4.92667	3.25917	7.24571	6.72078	3.3604
4.93	4.15749	4.23775	5.87905	6.444		4.93	3.26133	7.23985	6.71983	3.36348
4.93333	4.16087	4.24171	5.88182	6.44308		4.93333	3.26528	7.24406	6.72011	3.36888
4.93667	4.16184	4.24505	5.8817	6.44415		4.93667	3.26713	7.24426	6.72101	3.3724
4.94	4.16403	4.24014	5.88291	6.44881		4.94	3.26702	7.24719	6.72372	3.37684
4.94333	4.16452	4.24938	5.88212	6.45034		4.94333	3.26646	7.25168	6.72235	3.38198
4.94667	4.17006	4.24596	5.88256	6.45081		4.94667	3.26979	7.24458	6.7275	3.38414
4.95	4.17345	4.25045	5.8871	6.44808		4.95	3.27368	7.24508	6.73085	3.38651
4.95333	4.17346	4.24285	5.88357	6.45134		4.95333	3.27902	7.24379	6.73075	3.38865
4.95667	4.17462	4.25215	5.88903	6.44735		4.95667	3.28347	7.241	6.72639	3.39133
4.96	4.17602	4.25384	5.88846	6.45513		4.96	3.28653	7.24678	6.73136	3.39089
4.96333	4.18067	4.25665	5.88672	6.44561		4.96333	3.2897	7.24741	6.72561	3.39443
4.96667	4.18203	4.25309	5.88731	6.45748		4.96667	3.28889	7.24861	6.73066	3.39635
4.97	4.17779	4.25844	5.88853	6.45449		4.97	3.28952	7.25049	6.7314	3.39966
4.97333	4.18882	4.26058	5.88794	6.45497		4.97333	3.2906	7.24968	6.73303	3.39919
4.97667	4.18235	4.25947	5.88904	6.45631		4.97667	3.29201	7.25467	6.73034	3.40256
4.98	4.18678	4.26027	5.89536	6.45761		4.98	3.29324	7.24714	6.73824	3.40395
4.98333	4.19271	4.27036	5.89509	6.45431		4.98333	3.29892	7.25658	6.7346	3.40811
4.98667	4.1866	4.26316	5.89576	6.45681		4.98667	3.30352	7.24887	6.73951	3.41307
4.99	4.18778	4.26461	5.90002	6.46045		4.99	3.30609	7.25083	6.73851	3.41904
4.99333	4.19562	4.27027	5.89191	6.4597		4.99333	3.30953	7.25298	6.73564	3.42297
4.99667	4.19471	4.27382	5.89567	6.46032		4.99667	3.31305	7.25716	6.73706	3.42898
5	4.19842	4.27135	5.89896	6.45616		5	3.31352	7.25196	6.73705	3.43345
5.00333	4.19703	4.27826	5.9003	6.45871		5.00333	3.31577	7.25744	6.73809	3.43427
5.00667	4.19841	4.27424	5.90032	6.46333		5.00667	3.32029	7.25523	6.74338	3.43739
5.01	4.20164	4.27399	5.89443	6.46431		5.01	3.32126	7.25528	6.74211	3.44216
5.01333	4.20231	4.2785	5.90306	6.46184		5.01333	3.32322	7.2575	6.74035	3.44191
5.01667	4.20821	4.28044	5.89881	6.46122		5.01667	3.32614	7.25781	6.74506	3.4431
5.02	4.20877	4.28383	5.90287	6.46497		5.02	3.32659	7.25566	6.74697	3.44892
5.02333	4.20788	4.28565	5.90989	6.471		5.02333	3.32664	7.25847	6.74456	3.45052
5.02667	4.20555	4.28656	5.90705	6.46743		5.02667	3.33224	7.26129	6.74534	3.45192
5.03	4.20802	4.28427	5.9057	6.47101		5.03	3.33453	7.26386	6.74605	3.45674
5.03333	4.21533	4.29007	5.90609	6.46564		5.03333	3.335	7.25789	6.74772	3.4596
5.03667	4.21207	4.29237	5.90735	6.46925		5.03667	3.33733	7.25987	6.74836	3.46133
5.04	4.21548	4.29373	5.90853	6.46918		5.04	3.34064	7.25881	6.7435	3.46321
5.04333	4.21679	4.28898	5.91039	6.46557		5.04333	3.34189	7.26888	6.74841	3.46827
5.04667	4.22222	4.2979	5.90731	6.46744		5.04667	3.34492	7.26608	6.75705	3.47114
5.05	4.22243	4.3023	5.90962	6.47147		5.05	3.34873	7.26365	6.75284	3.47426
5.05333	4.22373	4.29991	5.90915	6.47194		5.05333	3.35373	7.26795	6.75054	3.47633
5.05667	4.22721	4.30614	5.90906	6.47575		5.05667	3.35599	7.26769	6.74904	3.48134
5.06	4.22707	4.30253	5.91593	6.47122		5.06	3.35892	7.2643	6.7509	3.4828
5.06333	4.23075	4.30712	5.91433	6.47282		5.06333	3.35955	7.26564	6.75522	3.48541
5.06667	4.23132	4.30555	5.91202	6.47493		5.06667	3.36217	7.26586	6.75731	3.48625
5.07	4.23167	4.30715	5.91216	6.47339		5.07	3.36552	7.26866	6.75566	3.49233
5.07333	4.23403	4.30941	5.91102	6.47551		5.07333	3.36813	7.26876	6.75179	3.49508
5.07667	4.23432	4.30997	5.91601	6.47735		5.07667	3.36737	7.26548	6.75549	3.49742
5.08	4.23583	4.30749	5.91613	6.47712		5.08	3.37287	7.27248	6.75268	3.49893
5.08333	4.23724	4.3129	5.92018	6.48538		5.08333	3.37609	7.27027	6.75878	3.50351
5.08667	4.23775	4.31278	5.92108	6.47676		5.08667	3.37602	7.27445	6.7574	3.50585
5.09	4.2392	4.31907	5.92182	6.4749		5.09	3.37767	7.26471	6.7606	3.50825
5.09333	4.24453	4.31988	5.91987	6.48216		5.09333	3.38235	7.26682	6.7592	3.51109
5.09667	4.2415	4.31981	5.92151	6.4819		5.09667	3.3819	7.27672	6.76251	3.51693
5.1	4.23919	4.31299	5.92237	6.48306		5.1	3.38487	7.27142	6.75706	3.51971
5.10333	4.24883	4.31957	5.92281	6.47905		5.10333	3.38811	7.27506	6.7642	3.52096
5.10667	4.25001	4.32676	5.92629	6.47703		5.10667	3.39018	7.27809	6.75874	3.52577
5.11	4.24723	4.32866	5.92769	6.48216		5.11	3.39207	7.2711	6.76222	3.52831
5.11333	4.2515	4.3268	5.9258	6.48428		5.11333	3.39615	7.27717	6.76402	3.52914
5.11667	4.2536	4.32962	5.92656	6.48528		5.11667	3.39739	7.27999	6.76262	3.53315
5.12	4.25188	4.33027	5.9245	6.48833		5.12	3.39963	7.27892	6.76587	3.53734
5.12333	4.25959	4.32847	5.93013	6.48995		5.12333	3.40293	7.2796	6.76644	3.53882
5.12667	4.25807	4.33191	5.92998	6.4947		5.12667	3.40496	7.27916	6.76499	3.54217
5.13	4.25867	4.33747	5.93418	6.49095		5.13	3.40708	7.27743	6.76696	3.54553
5.13333	4.26115	4.33657	5.92386	6.4882		5.13333	3.40915	7.28234	6.76952	3.54729
5.13667	4.26267	4.33506	5.93066	6.48799		5.13667	3.41134	7.28409	6.77157	3.54869
5.14	4.26429	4.33863	5.92926	6.49536		5.14	3.41383	7.28017	6.76746	3.55198
5.14333	4.2687	4.34504	5.92693	6.48455		5.14333	3.41613	7.28449	6.76922	3.5551
5.14667	4.26823	4.34711	5.93363	6.49296		5.14667	3.41636	7.28467	6.77658	3.55733
5.15	4.27234	4.34604	5.93271	6.49426		5.15	3.41884	7.28497	6.77123	3.55969
5.15333	4.27438	4.34526	5.93342	6.4914		5.15333	3.42158	7.28755	6.77207	3.56661
5.15667	4.26948	4.34158	5.93694	6.49326		5.15667	3.42407	7.28884	6.77619	3.56997
5.16	4.27161	4.35048	5.93828	6.49885		5.16	3.42598	7.29038	6.77202	3.57189
5.16333	4.2778	4.3486	5.9416	6.49249		5.16333	3.42882	7.28576	6.77658	3.57565
5.16667	4.2767	4.35032	5.94152	6.49706		5.16667	3.4313	7.28543	6.77475	3.57953
5.17	4.28335	4.35639	5.93783	6.49695		5.17	3.43451	7.28847	6.77388	3.58124
5.17333	4.28306	4.35747	5.94116	6.49533		5.17333	3.43608	7.28431	6.77745	3.58298
5.17667	4.27839	4.35352	5.94122	6.50119		5.17667	3.43989	7.28525	6.77847	3.58421
5.18	4.28097	4.35959	5.94188	6.49773		5.18	3.44252	7.28787	6.77527	3.58667
5.18333	4.28195	4.35731	5.93839	6.50469		5.18333	3.4441	7.29423	6.78432	3.58986
5.18667	4.28802	4.35598	5.94339	6.49332		5.18667	3.44627	7.28627	6.78456	3.59096
5.19	4.28494	4.36381	5.94496	6.50019		5.19	3.44906	7.28696	6.78508	3.59611
5.19333	4.2937	4.35908	5.94938	6.49895		5.19333	3.45013	7.29164	6.77744	3.60118
5.19667	4.28619	4.36081	5.9414	6.50043		5.19667	3.45186	7.28983	6.786	3.60352
5.2	4.29816	4.36388	5.94023	6.50358		5.2	3.45614	7.2931	6.78494	3.60607
5.20333	4.29972	4.36603	5.94499	6.50198		5.20333	3.45833	7.29551	6.7865	3.61026
5.20667	4.29369	4.3695	5.94548	6.50242		5.20667	3.46133	7.29209	6.78608	3.60892
5.21	4.29531	4.36825	5.94547	6.50784		5.21	3.46389	7.29726	6.78342	3.61159
5.21333	4.29497	4.37043	5.95057	6.50436		5.21333	3.46797	7.29125	6.78576	3.61413
5.21667	4.30019	4.3751	5.94714	6.50861		5.21667	3.46873	7.29903	6.78699	3.61603
5.22	4.29765	4.37625	5.94766	6.50854		5.22	3.47022	7.29475	6.79152	3.61824
5.22333	4.29892	4.37078	5.95193	6.50922		5.22333	3.47032	7.29665	6.78781	3.62544
5.22667	4.30512	4.37722	5.95422	6.5101		5.22667	3.47321	7.30007	6.78643	3.62771
5.23	4.3045	4.38146	5.95674	6.51076		5.23	3.4759	7.29663	6.79109	3.63214
5.23333	4.30459	4.37705	5.956	6.50882		5.23333	3.47932	7.29757	6.78538	3.63543
5.23667	4.30843	4.38133	5.95757	6.51503		5.23667	3.48164	7.29876	6.79143	3.63738
5.24	4.31249	4.38018	5.95483	6.51005		5.24	3.48461	7.29778	6.78989	3.63913
5.24333	4.31096	4.38132	5.95956	6.51535		5.24333	3.48556	7.30033	6.78799	3.6425
5.24667	4.31437	4.37907	5.95435	6.51279		5.24667	3.48636	7.29923	6.79567	3.64467
5.25	4.3161	4.39387	5.95836	6.51299		5.25	3.48742	7.30339	6.79431	3.64795
5.25333	4.31442	4.38752	5.95817	6.5143		5.25333	3.49001	7.30359	6.80004	3.65249
5.25667	4.31803	4.38612	5.95448	6.51479		5.25667	3.49258	7.30289	6.79241	3.65539
5.26	4.3153	4.39104	5.95909	6.51786		5.26	3.49667	7.30403	6.80208	3.65845
5.26333	4.32034	4.39017	5.95629	6.51823		5.26333	3.50134	7.3048	6.79804	3.66147
5.26667	4.3248	4.39346	5.9577	6.51918		5.26667	3.50437	7.30104	6.80631	3.66371
5.27	4.32291	4.39568	5.96397	6.5157		5.27	3.50719	7.30462	6.80048	3.66642
5.27333	4.31854	4.39397	5.96441	6.51943		5.27333	3.50897	7.30518	6.80158	3.66598
5.27667	4.32812	4.39767	5.96361	6.51543		5.27667	3.51035	7.30562	6.80034	3.66733
5.28	4.32859	4.39409	5.96513	6.51518		5.28	3.51097	7.30634	6.79867	3.6704
5.28333	4.33012	4.3975	5.96232	6.52101		5.28333	3.51277	7.30607	6.80242	3.67309
5.28667	4.32784	4.40349	5.96678	6.52225		5.28667	3.51424	7.30644	6.79922	3.67354
5.29	4.33242	4.40141	5.96328	6.52025		5.29	3.51665	7.31078	6.80638	3.67845
5.29333	4.33231	4.40764	5.96684	6.52184		5.29333	3.51885	7.31127	6.8029	3.68295
5.29667	4.33182	4.4033	5.96288	6.51929		5.29667	3.52106	7.30877	6.80438	3.68543
5.3	4.3337	4.40719	5.96663	6.52703		5.3	3.52256	7.3148	6.80612	3.68802
5.30333	4.32598	4.41331	5.96917	6.52446		5.30333	3.52747	7.31483	6.80592	3.69433
5.30667	4.33579	4.41118	5.97236	6.52406		5.30667	3.53026	7.31503	6.80391	3.69733
5.31	4.34111	4.40851	5.97524	6.52975		5.31	3.53235	7.31185	6.80751	3.69936
5.31333	4.33921	4.41043	5.96791	6.52839		5.31333	3.53458	7.31291	6.80961	3.7021
5.31667	4.34001	4.41279	5.97515	6.52832		5.31667	3.53482	7.31542	6.80911	3.7039
5.32	4.34058	4.41724	5.97629	6.53134		5.32	3.53615	7.31105	6.80526	3.70572
5.32333	4.34413	4.42164	5.97417	6.52649		5.32333	3.53747	7.31526	6.80923	3.7082
5.32667	4.34477	4.41625	5.97223	6.52924		5.32667	3.54056	7.31431	6.81319	3.71039
5.33	4.35194	4.42509	5.97189	6.52706		5.33	3.54105	7.31425	6.80887	3.71106
5.33333	4.3478	4.417	5.98002	6.53343		5.33333	3.54611	7.31219	6.80988	3.71442
5.33667	4.34829	4.42325	5.9801	6.53154		5.33667	3.54721	7.31808	6.81169	3.71856
5.34	4.35349	4.42612	5.97846	6.52804		5.34	3.54866	7.31598	6.81163	3.71993
5.34333	4.34324	4.42314	5.97125	6.53268		5.34333	3.5506	7.32131	6.81278	3.72345
5.34667	4.35265	4.42426	5.97972	6.53564		5.34667	3.55461	7.32237	6.81462	3.72633
5.35	4.35601	4.42486	5.97901	6.53389		5.35	3.55642	7.32238	6.81352	3.72891
5.35333	4.35632	4.42842	5.98346	6.53312		5.35333	3.55706	7.32091	6.81455	3.73209
5.35667	4.35774	4.43276	5.98056	6.53399		5.35667	3.56134	7.3198	6.81854	3.73592
5.36	4.36063	4.43231	5.98345	6.54105		5.36	3.56138	7.31999	6.82068	3.73875
5.36333	4.35682	4.42495	5.98197	6.53373		5.36333	3.56288	7.31963	6.81875	3.74483
5.36667	4.36353	4.43443	5.98492	6.53902		5.36667	3.56513	7.32268	6.81932	3.74845
5.37	4.35837	4.43526	5.98702	6.54522		5.37	3.57116	7.32534	6.81802	3.75036
5.37333	4.36385	4.4335	5.98454	6.53887		5.37333	3.5725	7.32453	6.82238	3.75397
5.37667	4.36259	4.43618	5.98663	6.53743		5.37667	3.57514	7.32092	6.82597	3.75777
5.38	4.36894	4.43544	5.98638	6.53941		5.38	3.57732	7.3274	6.82381	3.75807
5.38333	4.36807	4.44328	5.98525	6.53888		5.38333	3.57879	7.32595	6.82293	3.75946
5.38667	4.37251	4.4411	5.98757	6.54029		5.38667	3.5813	7.32597	6.82747	3.76151
5.39	4.37045	4.44195	5.98782	6.5433		5.39	3.58272	7.33055	6.82553	3.76183
5.39333	4.37271	4.44083	5.98871	6.54032		5.39333	3.58558	7.32049	6.82685	3.76288
5.39667	4.37342	4.44386	5.98943	6.54218		5.39667	3.58724	7.33222	6.82539	3.76597
5.4	4.37319	4.4478	5.9933	6.54594		5.4	3.58926	7.32847	6.82882	3.77149
5.40333	4.38012	4.4501	5.98858	6.54691		5.40333	3.59094	7.33355	6.82666	3.77435
5.40667	4.3796	4.4532	5.9882	6.54595		5.40667	3.59494	7.3265	6.82972	3.77829
5.41	4.38191	4.45427	5.99155	6.54865		5.41	3.59762	7.32726	6.82534	3.78028
5.41333	4.37834	4.45453	5.99145	6.54087		5.41333	3.60023	7.33117	6.82819	3.78145
5.41667	4.38057	4.45427	5.99559	6.54575		5.41667	3.60374	7.33182	6.83174	3.78462
5.42	4.38364	4.45719	5.99367	6.54398		5.42	3.60656	7.33296	6.83444	3.78693
5.42333	4.38767	4.4576	5.99205	6.5512		5.42333	3.60692	7.33153	6.83041	3.79067
5.42667	4.38747	4.4553	6.00168	6.54707		5.42667	3.60911	7.33213	6.83256	3.79296
5.43	4.38499	4.46046	6.00011	6.551		5.43	3.61192	7.331	6.8398	3.79744
5.43333	4.38586	4.4658	5.99744	6.54762		5.43333	3.61099	7.33237	6.83309	3.79698
5.43667	4.39099	4.45724	6.00044	6.55107		5.43667	3.61269	7.33812	6.8314	3.80071
5.44	4.38838	4.4627	5.99909	6.54789		5.44	3.61417	7.33829	6.83377	3.80154
5.44333	4.399	4.46716	5.99856	6.5533		5.44333	3.61544	7.33328	6.83507	3.80498
5.44667	4.39392	4.46455	6.00213	6.5545		5.44667	3.61716	7.33844	6.83656	3.80812
5.45	4.39711	4.46516	6.00309	6.54964		5.45	3.62029	7.3364	6.83754	3.81014
5.45333	4.39855	4.4665	6.00293	6.55686		5.45333	3.6217	7.33811	6.83263	3.81203
5.45667	4.39628	4.46926	6.00071	6.55583		5.45667	3.62301	7.3372	6.83324	3.81487
5.46	4.3975	4.46757	6.0073	6.55506		5.46	3.62505	7.34722	6.84091	3.81697
5.46333	4.40462	4.47052	6.00844	6.5566		5.46333	3.62599	7.34305	6.84039	3.81861
5.46667	4.39867	4.4724	6.00679	6.55482		5.46667	3.6305	7.3477	6.84294	3.8219
5.47	4.39972	4.47619	6.00224	6.55938		5.47	3.63528	7.34425	6.84039	3.82849
5.47333	4.40323	4.47529	6.00624	6.5596		5.47333	3.64117	7.33961	6.83883	3.83166
5.47667	4.4081	4.4774	6.01288	6.5605		5.47667	3.6438	7.34191	6.84474	3.83528
5.48	4.40718	4.47171	6.01364	6.56169		5.48	3.6475	7.34161	6.84115	3.83541
5.48333	4.41201	4.47554	6.00972	6.56085		5.48333	3.64625	7.34401	6.84542	3.83861
5.48667	4.40785	4.4772	6.01008	6.5642		5.48667	3.6467	7.34135	6.84475	3.83876
5.49	4.40772	4.48087	6.01368	6.56277		5.49	3.64693	7.34622	6.84317	3.84244
5.49333	4.40997	4.48708	6.01088	6.56211		5.49333	3.64792	7.34658	6.84424	3.84337
5.49667	4.4121	4.4877	6.01008	6.55886		5.49667	3.64906	7.34356	6.8513	3.84995
5.5	4.41283	4.49029	6.01508	6.5609		5.5	3.65378	7.34301	6.85078	3.85038
5.50333	4.41313	4.48298	6.0144	6.56506		5.50333	3.65381	7.34538	6.84228	3.85182
5.50667	4.42056	4.4845	6.01462	6.56294		5.50667	3.65726	7.34792	6.84816	3.85242
5.51	4.41733	4.48157	6.01865	6.5615		5.51	3.66346	7.3503	6.84696	3.85458
5.51333	4.41713	4.487	6.01813	6.56428		5.51333	3.66532	7.3496	6.85019	3.85491
5.51667	4.42126	4.48824	6.01929	6.56513		5.51667	3.66611	7.35245	6.85486	3.85946
5.52	4.42037	4.49029	6.02293	6.56621		5.52	3.67226	7.34791	6.84825	3.86486
5.52333	4.41627	4.49083	6.01753	6.56575		5.52333	3.67367	7.35104	6.85283	3.86848
5.52667	4.42559	4.49284	6.01953	6.56959		5.52667	3.67369	7.35267	6.85432	3.87258
5.53	4.42201	4.49449	6.01935	6.56686		5.53	3.67597	7.35206	6.86019	3.87494
5.53333	4.42499	4.48862	6.02257	6.57051		5.53333	3.67977	7.35237	6.85259	3.87779
5.53667	4.42892	4.49671	6.0222	6.5702		5.53667	3.67909	7.35246	6.85906	3.87882
5.54	4.42697	4.49937	6.01965	6.57398		5.54	3.68056	7.3534	6.85462	3.87994
5.54333	4.42649	4.49625	6.02707	6.57169		5.54333	3.68235	7.35265	6.86613	3.88191
5.54667	4.43326	4.49728	6.02482	6.5698		5.54667	3.68434	7.35509	6.85817	3.88416
5.55	4.43417	4.50552	6.02216	6.5735		5.55	3.68574	7.35357	6.85583	3.88578
5.55333	4.43341	4.50228	6.02376	6.57626		5.55333	3.6905	7.35379	6.85701	3.88926
5.55667	4.43419	4.50323	6.02083	6.57212		5.55667	3.6933	7.35177	6.85626	3.89218
5.56	4.43559	4.50948	6.02512	6.5767		5.56	3.69452	7.35237	6.86516	3.89513
5.56333	4.4333	4.51179	6.0284	6.57191		5.56333	3.69658	7.35498	6.86099	3.89817
5.56667	4.43812	4.51085	6.02757	6.57548		5.56667	3.69739	7.35874	6.85895	3.9011
5.57	4.43724	4.50887	6.02331	6.5796		5.57	3.69715	7.35832	6.86727	3.90358
5.57333	4.44175	4.51542	6.0331	6.57871		5.57333	3.69646	7.35845	6.86337	3.9071
5.57667	4.43714	4.51064	6.03708	6.58043		5.57667	3.69977	7.35543	6.86221	3.91045
5.58	4.44508	4.51351	6.02574	6.58102		5.58	3.70251	7.35992	6.86174	3.91324
5.58333	4.43947	4.51513	6.03253	6.583		5.58333	3.70454	7.36102	6.86232	3.91633
5.58667	4.4436	4.51547	6.0328	6.58208		5.58667	3.70748	7.35692	6.86959	3.91887
5.59	4.44925	4.51737	6.03449	6.57807		5.59	3.7126	7.36033	6.86549	3.9204
5.59333	4.44922	4.51681	6.03484	6.58584		5.59333	3.71454	7.35875	6.86524	3.92277
5.59667	4.45195	4.5173	6.03386	6.57801		5.59667	3.71747	7.35677	6.86775	3.92515
5.6	4.44821	4.51979	6.03311	6.5826		5.6	3.71846	7.36195	6.86554	3.92792
5.60333	4.45084	4.52401	6.03881	6.5854		5.60333	3.72135	7.36469	6.86622	3.92941
5.60667	4.45035	4.51967	6.03961	6.5832		5.60667	3.72371	7.36286	6.86747	3.93101
5.61	4.44684	4.52486	6.03733	6.58416		5.61	3.72464	7.3618	6.86696	3.93326
5.61333	4.45672	4.52386	6.03584	6.58475		5.61333	3.72613	7.36613	6.86931	3.93602
5.61667	4.44929	4.52325	6.04619	6.58651		5.61667	3.73068	7.36458	6.87701	3.93717
5.62	4.4581	4.52493	6.03896	6.58354		5.62	3.73255	7.36228	6.87463	3.93922
5.62333	4.45915	4.52776	6.04281	6.58737		5.62333	3.73373	7.3673	6.87296	3.9411
5.62667	4.45901	4.52556	6.04715	6.5883		5.62667	3.73489	7.36439	6.87677	3.94219
5.63	4.45951	4.52967	6.03729	6.58942		5.63	3.73602	7.36814	6.87561	3.94292
5.63333	4.46171	4.53023	6.04737	6.58872		5.63333	3.73647	7.36968	6.87137	3.94571
5.63667	4.46041	4.5243	6.0459	6.58843		5.63667	3.73874	7.37053	6.87236	3.95189
5.64	4.46236	4.53419	6.04424	6.59486		5.64	3.73994	7.37486	6.8744	3.95536
5.64333	4.46385	4.535	6.04687	6.58759		5.64333	3.74306	7.36717	6.8788	3.95804
5.64667	4.46194	4.53311	6.04389	6.59205		5.64667	3.74465	7.37004	6.87818	3.9603
5.65	4.46455	4.5393	6.04737	6.59018		5.65	3.74646	7.36797	6.87621	3.96355
5.65333	4.46533	4.53755	6.04856	6.59092		5.65333	3.74695	7.37116	6.87943	3.96185
5.65667	4.46771	4.53489	6.04621	6.58692		5.65667	3.74863	7.37389	6.87626	3.96371
5.66	4.46544	4.53801	6.05124	6.59403		5.66	3.74941	7.37165	6.88034	3.96796
5.66333	4.47075	4.53731	6.04983	6.59613		5.66333	3.75011	7.37175	6.8816	3.97148
5.66667	4.47211	4.53985	6.04904	6.59693		5.66667	3.75362	7.37527	6.88321	3.97116
5.67	4.4705	4.54234	6.04995	6.59892		5.67	3.75834	7.37475	6.87874	3.97593
5.67333	4.47507	4.54885	6.05191	6.59873		5.67333	3.76254	7.37967	6.888	3.98073
5.67667	4.4753	4.54749	6.0502	6.60099		5.67667	3.76553	7.37677	6.88605	3.9809
5.68	4.47951	4.54141	6.05576	6.60092		5.68	3.76982	7.37398	6.8816	3.9843
5.68333	4.48024	4.55186	6.05534	6.60188		5.68333	3.77269	7.38078	6.88447	3.98968
5.68667	4.48058	4.55057	6.05311	6.60023		5.68667	3.77428	7.37304	6.8879	3.99301
5.69	4.4813	4.54793	6.05784	6.59783		5.69	3.77495	7.37707	6.89041	3.99418
5.69333	4.48456	4.55002	6.05381	6.60409		5.69333	3.77656	7.37636	6.8901	3.99761
5.69667	4.48247	4.55215	6.06007	6.60404		5.69667	3.77695	7.38284	6.88666	3.99931
5.7	4.48208	4.55504	6.05976	6.60049		5.7	3.77745	7.37795	6.88943	4.00011
5.70333	4.47976	4.55551	6.055	6.6052		5.70333	3.77902	7.38158	6.88614	4.00027
5.70667	4.48133	4.5581	6.06528	6.60209		5.70667	3.78145	7.37887	6.88733	4.00254
5.71	4.48788	4.56047	6.05944	6.60052		5.71	3.78379	7.38093	6.89247	4.0055
5.71333	4.48361	4.56032	6.05939	6.60366		5.71333	3.78521	7.38068	6.89295	4.00774
5.71667	4.4863	4.5633	6.06106	6.60466		5.71667	3.78596	7.38224	6.89301	4.00963
5.72	4.48641	4.56045	6.06351	6.606		5.72	3.78655	7.38443	6.89137	4.01293
5.72333	4.49392	4.56319	6.0582	6.60969		5.72333	3.78708	7.3839	6.8936	4.01495
5.72667	4.49752	4.56133	6.06617	6.61035		5.72667	3.78865	7.38206	6.89279	4.01701
5.73	4.49149	4.57023	6.06153	6.60633		5.73	3.79199	7.38309	6.89711	4.02004
5.73333	4.49155	4.55939	6.06865	6.60677		5.73333	3.79555	7.38999	6.89198	4.02339
5.73667	4.49663	4.56989	6.06057	6.60707		5.73667	3.79607	7.37986	6.89118	4.02578
5.74	4.49447	4.56318	6.0606	6.6075		5.74	3.79743	7.38674	6.89794	4.02743
5.74333	4.4968	4.56544	6.0646	6.60934		5.74333	3.79972	7.3858	6.89255	4.0305
5.74667	4.49758	4.56388	6.06519	6.61252		5.74667	3.80071	7.3881	6.894	4.03146
5.75	4.49788	4.56478	6.06643	6.61325		5.75	3.80151	7.38426	6.89783	4.03377
5.75333	4.49897	4.57446	6.07353	6.61229		5.75333	3.80682	7.38885	6.89689	4.03625
5.75667	4.49894	4.57284	6.06396	6.61754		5.75667	3.80956	7.38282	6.8982	4.0408
5.76	4.50122	4.57486	6.07258	6.60917		5.76	3.81112	7.38688	6.90276	4.04173
5.76333	4.50656	4.57288	6.07319	6.6133		5.76333	3.81391	7.3908	6.89905	4.0439
5.76667	4.50261	4.57071	6.06898	6.61915		5.76667	3.81462	7.39028	6.90416	4.0455
5.77	4.50585	4.57771	6.073	6.61643		5.77	3.81613	7.38919	6.89949	4.04792
5.77333	4.50348	4.57138	6.07198	6.61317		5.77333	3.81918	7.38392	6.90481	4.05084
5.77667	4.50488	4.57442	6.07595	6.61672		5.77667	3.82119	7.39075	6.90417	4.05245
5.78	4.50879	4.58189	6.0686	6.6183		5.78	3.82316	7.39092	6.90305	4.05504
5.78333	4.51036	4.57879	6.07376	6.61299		5.78333	3.82786	7.38602	6.90636	4.05838
5.78667	4.51091	4.58392	6.07348	6.62214		5.78667	3.82797	7.39128	6.90457	4.06007
5.79	4.50943	4.5814	6.07811	6.61817		5.79	3.82699	7.39029	6.90668	4.06099
5.79333	4.508	4.5814	6.07966	6.61942		5.79333	3.82964	7.39547	6.90962	4.06499
5.79667	4.51095	4.5839	6.0815	6.62714		5.79667	3.83	7.39398	6.90726	4.06738
5.8	4.51775	4.58574	6.07663	6.6179		5.8	3.83317	7.39733	6.90831	4.06865
5.80333	4.51306	4.58081	6.07828	6.62308		5.80333	3.83696	7.39955	6.90662	4.07309
5.80667	4.51372	4.58924	6.0844	6.62015		5.80667	3.83991	7.39544	6.91356	4.07541
5.81	4.51804	4.58493	6.08104	6.62107		5.81	3.83984	7.3941	6.90647	4.07619
5.81333	4.51821	4.58972	6.08181	6.62191		5.81333	3.8425	7.39994	6.90716	4.07672
5.81667	4.51777	4.58758	6.08551	6.62189		5.81667	3.84282	7.39633	6.9137	4.07944
5.82	4.52017	4.59001	6.08567	6.62632		5.82	3.84168	7.39817	6.91257	4.08211
5.82333	4.52224	4.59103	6.08622	6.62426		5.82333	3.8437	7.39385	6.91483	4.08474
5.82667	4.5199	4.59209	6.0858	6.62143		5.82667	3.84629	7.39763	6.91154	4.08623
5.83	4.52327	4.59299	6.084	6.6232		5.83	3.84766	7.40279	6.91339	4.09071
5.83333	4.52348	4.59776	6.08435	6.62744		5.83333	3.84875	7.40083	6.91372	4.09202
5.83667	4.52518	4.59691	6.09147	6.62658		5.83667	3.84998	7.40283	6.91819	4.09384
5.84	4.52693	4.59727	6.08465	6.63071		5.84	3.85226	7.40587	6.91848	4.09198
5.84333	4.52574	4.59745	6.09345	6.63175		5.84333	3.85324	7.40406	6.91724	4.0944
5.84667	4.53047	4.59587	6.08633	6.62994		5.84667	3.85601	7.40636	6.91531	4.09519
5.85	4.53082	4.60564	6.09128	6.62942		5.85	3.85786	7.40513	6.91788	4.09651
5.85333	4.53053	4.59911	6.08747	6.62604		5.85333	3.86352	7.40338	6.91663	4.09987
5.85667	4.52606	4.60708	6.09293	6.62919		5.85667	3.86524	7.40177	6.91715	4.10529
5.86	4.53052	4.60312	6.08872	6.6302		5.86	3.86898	7.401	6.91507	4.10741
5.86333	4.53369	4.6044	6.08946	6.63364		5.86333	3.86986	7.40492	6.91759	4.11034
5.86667	4.53618	4.60136	6.09355	6.63316		5.86667	3.8718	7.40423	6.91584	4.11497
5.87	4.53304	4.60746	6.08941	6.63331		5.87	3.87183	7.40097	6.92003	4.11638
5.87333	4.53383	4.60869	6.09536	6.62969		5.87333	3.87327	7.40889	6.92047	4.11685
5.87667	4.53553	4.60589	6.09145	6.63311		5.87667	3.87401	7.40708	6.92413	4.1197
5.88	4.54086	4.60918	6.09383	6.6355		5.88	3.87741	7.40376	6.92229	4.12215
5.88333	4.54078	4.60934	6.0943	6.6349		5.88333	3.88044	7.41071	6.92522	4.1242
5.88667	4.53618	4.61199	6.1024	6.63541		5.88667	3.88469	7.40881	6.92327	4.12528
5.89	4.54503	4.61263	6.09637	6.63989		5.89	3.88713	7.40765	6.92661	4.12932
5.89333	4.54072	4.60965	6.10005	6.63495		5.89333	3.8895	7.41202	6.92589	4.1306
5.89667	4.54596	4.60778	6.09541	6.64048		5.89667	3.88889	7.41115	6.92669	4.13155
5.9	4.54168	4.61303	6.09784	6.64205		5.9	3.89044	7.4094	6.92116	4.13191
5.90333	4.53979	4.62103	6.10068	6.64489		5.90333	3.89251	7.41205	6.9279	4.13487
5.90667	4.55091	4.61944	6.10287	6.6431		5.90667	3.89375	7.40689	6.9254	4.13712
5.91	4.54626	4.62037	6.10525	6.64365		5.91	3.89488	7.41437	6.92856	4.1397
5.91333	4.54763	4.6252	6.09828	6.6407		5.91333	3.89981	7.41507	6.92886	4.14332
5.91667	4.54876	4.62139	6.10283	6.64433		5.91667	3.90134	7.41478	6.93319	4.14689
5.92	4.54872	4.62435	6.10138	6.64015		5.92	3.90107	7.41385	6.93106	4.15063
5.92333	4.54905	4.62392	6.1048	6.64087		5.92333	3.90263	7.41462	6.92811	4.15332
5.92667	4.5446	4.62269	6.10858	6.64453		5.92667	3.90494	7.41181	6.93184	4.15547
5.93	4.55064	4.6274	6.10382	6.64628		5.93	3.90566	7.41635	6.93359	4.15787
5.93333	4.55358	4.62082	6.1046	6.64085		5.93333	3.90501	7.41233	6.93018	4.15993
5.93667	4.55618	4.62519	6.10687	6.64294		5.93667	3.90653	7.41563	6.93644	4.16124
5.94	4.55046	4.6238	6.11373	6.64714		5.94	3.90829	7.41583	6.93814	4.16315
5.94333	4.55821	4.62738	6.10524	6.64651		5.94333	3.9096	7.42115	6.93547	4.16623
5.94667	4.55881	4.62803	6.1113	6.64868		5.94667	3.91033	7.41507	6.93422	4.16714
5.95	4.55854	4.62669	6.10835	6.64734		5.95	3.91249	7.41692	6.9321	4.16951
5.95333	4.5635	4.62605	6.11303	6.64845		5.95333	3.91389	7.41942	6.94105	4.17012
5.95667	4.56221	4.6346	6.11133	6.64533		5.95667	3.91533	7.41596	6.93408	4.17179
5.96	4.56442	4.63251	6.10967	6.64904		5.96	3.91659	7.41677	6.9362	4.17199
5.96333	4.56618	4.63591	6.11154	6.64856		5.96333	3.91822	7.41463	6.93694	4.1744
5.96667	4.56454	4.63715	6.11335	6.65179		5.96667	3.92264	7.41701	6.93696	4.17571
5.97	4.56426	4.63816	6.11447	6.65036		5.97	3.92331	7.42322	6.93956	4.17971
5.97333	4.56934	4.64198	6.1172	6.65313		5.97333	3.92565	7.42238	6.93915	4.18154
5.97667	4.5649	4.63854	6.10746	6.65351		5.97667	3.92631	7.42024	6.93781	4.18268
5.98	4.5686	4.63949	6.11606	6.6508		5.98	3.92955	7.42121	6.9362	4.18645
5.98333	4.56858	4.63711	6.11376	6.65268		5.98333	3.93153	7.42435	6.94565	4.18789
5.98667	4.56999	4.63863	6.11839	6.65173		5.98667	3.93608	7.42533	6.94792	4.18957
5.99	4.56665	4.64471	6.11839	6.64962		5.99	3.93817	7.42384	6.94298	4.19146
5.99333	4.57126	4.63817	6.11734	6.65234		5.99333	3.94138	7.42805	6.94524	4.19404
5.99667	4.57268	4.64411	6.11665	6.65642		5.99667	3.94314	7.42558	6.94691	4.19658
6	4.57292	4.6451	6.12178	6.65404		6	3.9435	7.42592	6.9508	4.1991
6.00333	4.57337	4.64284	6.12262	6.66025		6.00333	3.94522	7.42808	6.95256	4.2032
6.00667	4.57369	4.64606	6.11731	6.65415		6.00667	3.94802	7.42512	6.94378	4.2059
6.01	4.57839	4.64937	6.12287	6.66003		6.01	3.95006	7.42563	6.94536	4.21054
6.01333	4.57761	4.64492	6.12458	6.6578		6.01333	3.94974	7.43167	6.95047	4.21139
6.01667	4.57697	4.64724	6.12404	6.66287		6.01667	3.9521	7.43033	6.95044	4.21377
6.02	4.58044	4.65007	6.12728	6.65922		6.02	3.95344	7.42827	6.94991	4.2145
6.02333	4.57867	4.65333	6.12516	6.6572		6.02333	3.9541	7.42953	6.94878	4.21629
6.02667	4.57874	4.65566	6.12879	6.66034		6.02667	3.95584	7.42945	6.95052	4.21722
6.03	4.58057	4.65019	6.12503	6.65983		6.03	3.95781	7.43422	6.95314	4.21913
6.03333	4.5882	4.65345	6.1209	6.66357		6.03333	3.95848	7.43008	6.95027	4.22175
6.03667	4.58218	4.65267	6.12909	6.65984		6.03667	3.96159	7.43242	6.95316	4.22634
6.04	4.58471	4.65607	6.13256	6.66465		6.04	3.96385	7.42713	6.95591	4.22724
6.04333	4.58353	4.6582	6.12746	6.65927		6.04333	3.96523	7.43556	6.95285	4.23083
6.04667	4.58308	4.65779	6.12589	6.66125		6.04667	3.96881	7.43165	6.95732	4.23291
6.05	4.58373	4.65748	6.12639	6.66564		6.05	3.97117	7.43104	6.95641	4.23337
6.05333	4.58887	4.66495	6.13316	6.66871		6.05333	3.97244	7.42969	6.96112	4.23299
6.05667	4.58776	4.65815	6.12735	6.6661		6.05667	3.97488	7.43274	6.95574	4.23701
6.06	4.58504	4.66172	6.13344	6.66766		6.06	3.97585	7.43599	6.95669	4.23867
6.06333	4.59465	4.66449	6.13633	6.66676		6.06333	3.97611	7.43478	6.9571	4.23944
6.06667	4.58874	4.66452	6.12991	6.66553		6.06667	3.97823	7.43536	6.95882	4.24368
6.07	4.59371	4.65992	6.13678	6.6695		6.07	3.9787	7.43554	6.9592	4.24484
6.07333	4.59293	4.66595	6.13283	6.66935		6.07333	3.97945	7.43528	6.96427	4.24427
6.07667	4.59269	4.66416	6.13669	6.66542		6.07667	3.98283	7.43621	6.96193	4.24551
6.08	4.59342	4.66783	6.13267	6.66708		6.08	3.98569	7.43888	6.96566	4.24832
6.08333	4.59649	4.67045	6.13579	6.67375		6.08333	3.98643	7.43637	6.96194	4.24902
6.08667	4.59867	4.66726	6.13803	6.66614		6.08667	3.98991	7.43627	6.96062	4.25464
6.09	4.59882	4.66842	6.13455	6.67386		6.09	3.99118	7.44007	6.96942	4.25845
6.09333	4.60129	4.67456	6.13766	6.67415		6.09333	3.99175	7.44282	6.96506	4.26106
6.09667	4.60125	4.66553	6.14111	6.67496		6.09667	3.99227	7.44241	6.96115	4.26341
6.1	4.59869	4.6728	6.13824	6.6722		6.1	3.99499	7.44089	6.96034	4.26655
6.10333	4.60261	4.67185	6.13773	6.67371		6.10333	3.99388	7.44497	6.96541	4.26632
6.10667	4.60074	4.67107	6.143	6.67413		6.10667	3.99635	7.44058	6.96821	4.26726
6.11	4.60126	4.67553	6.14634	6.67173		6.11	3.99808	7.44799	6.96512	4.26881
6.11333	4.59843	4.6822	6.14128	6.67598		6.11333	3.99892	7.44323	6.97017	4.27056
6.11667	4.61086	4.67483	6.14424	6.67793		6.11667	3.99963	7.44352	6.96418	4.27213
6.12	4.60204	4.67923	6.14645	6.67707		6.12	4.00416	7.44754	6.9663	4.27344
6.12333	4.60696	4.68071	6.14208	6.67841		6.12333	4.00501	7.44563	6.97101	4.27585
6.12667	4.60573	4.6807	6.14285	6.68137		6.12667	4.00637	7.44429	6.97098	4.27758
6.13	4.60783	4.67549	6.1472	6.67402		6.13	4.0096	7.44882	6.97061	4.27963
6.13333	4.60914	4.67574	6.15158	6.67553		6.13333	4.01239	7.44734	6.96996	4.28101
6.13667	4.60791	4.68593	6.14517	6.68017		6.13667	4.01262	7.44794	6.96757	4.28432
6.14	4.60957	4.68542	6.14661	6.68164		6.14	4.01519	7.45211	6.9759	4.28629
6.14333	4.60809	4.68102	6.1495	6.67635		6.14333	4.01695	7.44896	6.97366	4.28742
6.14667	4.61263	4.68736	6.14364	6.68277		6.14667	4.01774	7.44969	6.97255	4.28881
6.15	4.61345	4.683	6.14855	6.68009		6.15	4.01919	7.45062	6.97337	4.29038
6.15333	4.61509	4.67912	6.15129	6.68203		6.15333	4.02033	7.44883	6.97926	4.29172
6.15667	4.61967	4.69305	6.14983	6.67996		6.15667	4.01989	7.45077	6.9772	4.29386
6.16	4.61217	4.68893	6.15148	6.68214		6.16	4.02095	7.45057	6.97029	4.29771
6.16333	4.61521	4.68987	6.15331	6.68337		6.16333	4.02111	7.44793	6.97601	4.3019
6.16667	4.6135	4.6915	6.15131	6.68201		6.16667	4.02376	7.45175	6.97936	4.30292
6.17	4.61255	4.6914	6.15201	6.68241		6.17	4.02445	7.45293	6.97931	4.30609
6.17333	4.61413	4.68951	6.15301	6.68357		6.17333	4.02759	7.45216	6.97647	4.30693
6.17667	4.6212	4.69732	6.15768	6.68764		6.17667	4.02902	7.45265	6.98152	4.30754
6.18	4.6206	4.6945	6.15777	6.68061		6.18	4.03258	7.45427	6.98029	4.30758
6.18333	4.61833	4.6896	6.15484	6.68906		6.18333	4.0332	7.44832	6.98457	4.31248
6.18667	4.62194	4.70066	6.15446	6.68654		6.18667	4.03575	7.45498	6.98043	4.31433
6.19	4.61911	4.6937	6.15734	6.69165		6.19	4.03402	7.45328	6.98135	4.3178
6.19333	4.62254	4.70148	6.15945	6.69099		6.19333	4.03537	7.45418	6.98301	4.32081
6.19667	4.62224	4.69504	6.15594	6.68926		6.19667	4.03692	7.46102	6.97961	4.32184
6.2	4.62342	4.69782	6.15561	6.69275		6.2	4.04019	7.45524	6.98231	4.32197
6.20333	4.62163	4.69544	6.16149	6.68788		6.20333	4.0399	7.45934	6.97873	4.32518
6.20667	4.63051	4.70111	6.16648	6.68821		6.20667	4.04362	7.45599	6.98281	4.32816
6.21	4.62769	4.706	6.15726	6.69523		6.21	4.04476	7.45976	6.98333	4.32831
6.21333	4.63109	4.7027	6.16262	6.69463		6.21333	4.0463	7.45918	6.98419	4.33105
6.21667	4.63098	4.69861	6.15932	6.69013		6.21667	4.04684	7.45592	6.98233	4.33234
6.22	4.63092	4.70179	6.16315	6.69128		6.22	4.04998	7.45645	6.98264	4.33136
6.22333	4.63464	4.70035	6.16529	6.69896		6.22333	4.05137	7.46118	6.9892	4.33197
6.22667	4.62992	4.70758	6.16393	6.70031		6.22667	4.05501	7.46336	6.98637	4.33663
6.23	4.63026	4.70325	6.16417	6.69501		6.23	4.05549	7.46226	6.98798	4.33846
6.23333	4.63083	4.71027	6.16301	6.69765		6.23333	4.0582	7.46376	6.99134	4.34277
6.23667	4.63759	4.71207	6.1684	6.69331		6.23667	4.06035	7.46025	6.99077	4.34557
6.24	4.63855	4.71018	6.16621	6.69443		6.24	4.05977	7.46391	6.98877	4.34727
6.24333	4.63333	4.70417	6.16674	6.69664		6.24333	4.05992	7.46053	6.99041	4.34681
6.24667	4.64385	4.7116	6.1732	6.69904		6.24667	4.06163	7.46381	6.98949	4.351
6.25	4.64061	4.71105	6.16671	6.69983		6.25	4.06165	7.45835	6.98886	4.35121
6.25333	4.6412	4.71058	6.16999	6.69952		6.25333	4.06282	7.46934	6.99403	4.35109
6.25667	4.64132	4.71584	6.17176	6.70311		6.25667	4.06585	7.46375	6.99176	4.3532
6.26	4.64137	4.7157	6.16831	6.70182		6.26	4.06866	7.46504	6.99368	4.35664
6.26333	4.64001	4.71537	6.16995	6.70073		6.26333	4.06942	7.46133	6.98935	4.3565
6.26667	4.64086	4.71052	6.17604	6.70363		6.26667	4.072	7.46489	6.99617	4.35745
6.27	4.64267	4.71456	6.17219	6.70149		6.27	4.07367	7.47159	6.99343	4.36517
6.27333	4.64272	4.71595	6.17566	6.70094		6.27333	4.07675	7.46575	6.99422	4.36636
6.27667	4.64408	4.71925	6.17674	6.69911		6.27667	4.0774	7.46648	6.99589	4.36799
6.28	4.64761	4.72039	6.17442	6.70749		6.28	4.0787	7.4715	7.00023	4.36931
6.28333	4.64697	4.72094	6.181	6.70091		6.28333	4.07792	7.46753	6.99523	4.37338
6.28667	4.64455	4.71573	6.17998	6.70449		6.28667	4.08037	7.46776	6.9956	4.37378
6.29	4.64931	4.72049	6.17176	6.70468		6.29	4.08193	7.46788	6.99469	4.37554
6.29333	4.64924	4.72424	6.18063	6.70752		6.29333	4.0843	7.46511	6.99988	4.3768
6.29667	4.64723	4.71899	6.18035	6.70504		6.29667	4.08817	7.47499	7.00061	4.37964
6.3	4.65428	4.72169	6.17821	6.71263		6.3	4.0897	7.4767	7.00186	4.37888
6.30333	4.65353	4.72555	6.18246	6.708		6.30333	4.08964	7.4721	7.00258	4.38062
6.30667	4.65312	4.72092	6.18135	6.70437		6.30667	4.08973	7.47357	6.9979	4.38365
6.31	4.65205	4.72107	6.1842	6.71313		6.31	4.09133	7.47531	7.00767	4.38499
6.31333	4.6523	4.73097	6.18328	6.70815		6.31333	4.09354	7.47292	7.00095	4.38728
6.31667	4.65192	4.72675	6.17955	6.70667		6.31667	4.09709	7.46888	7.00239	4.39145
6.32	4.65346	4.72535	6.18448	6.70938		6.32	4.09937	7.4729	7.00373	4.39235
6.32333	4.65428	4.72796	6.18563	6.71167		6.32333	4.10113	7.47457	7.00879	4.39397
6.32667	4.65199	4.73244	6.18394	6.70878		6.32667	4.10029	7.47243	7.00368	4.39555
6.33	4.66148	4.73061	6.1833	6.71657		6.33	4.09932	7.47098	7.00893	4.39659
6.33333	4.65764	4.73083	6.18701	6.71562		6.33333	4.10025	7.47496	7.00463	4.39725
6.33667	4.66058	4.73198	6.18614	6.71642		6.33667	4.10025	7.47295	7.00897	4.39937
6.34	4.65377	4.73448	6.18967	6.71444		6.34	4.10152	7.48205	7.01004	4.40079
6.34333	4.65948	4.73548	6.18465	6.71285		6.34333	4.10574	7.47619	7.00688	4.40443
6.34667	4.66326	4.74069	6.18662	6.71476		6.34667	4.10679	7.47427	7.00636	4.4046
6.35	4.66296	4.73645	6.18745	6.71667		6.35	4.11121	7.4811	7.00984	4.40773
6.35333	4.65611	4.73344	6.19631	6.71603		6.35333	4.11383	7.47809	7.0081	4.40906
6.35667	4.66165	4.73674	6.19289	6.71528		6.35667	4.1165	7.47382	7.00868	4.40956
6.36	4.6665	4.73991	6.18993	6.71924		6.36	4.1175	7.47474	7.01322	4.41015
6.36333	4.66245	4.7386	6.19234	6.7174		6.36333	4.12053	7.48011	7.01422	4.41404
6.36667	4.666	4.74106	6.1914	6.71714		6.36667	4.11834	7.48144	7.01035	4.41663
6.37	4.66659	4.74035	6.19077	6.71565		6.37	4.11921	7.48078	7.01991	4.41704
6.37333	4.66158	4.73848	6.19125	6.72215		6.37333	4.11988	7.48347	7.01513	4.42018
6.37667	4.67177	4.74326	6.18933	6.7186		6.37667	4.11896	7.47952	7.01562	4.42151
6.38	4.67097	4.74706	6.19928	6.72008		6.38	4.12059	7.4808	7.01073	4.42323
6.38333	4.66706	4.74133	6.19957	6.72803		6.38333	4.12418	7.48166	7.01388	4.42264
6.38667	4.67601	4.74645	6.19415	6.72293		6.38667	4.12565	7.48454	7.01598	4.42785
6.39	4.66858	4.74093	6.19921	6.72332		6.39	4.12709	7.48521	7.01563	4.43002
6.39333	4.67516	4.74903	6.19837	6.72243		6.39333	4.13119	7.48048	7.01619	4.43268
6.39667	4.66492	4.74457	6.20137	6.72783		6.39667	4.13133	7.49321	7.01856	4.43413
6.4	4.67246	4.75113	6.20037	6.72773		6.4	4.13288	7.48816	7.0183	4.43552
6.40333	4.67091	4.74785	6.20321	6.72882		6.40333	4.136	7.48427	7.02007	4.43592
6.40667	4.68028	4.75111	6.19917	6.7264		6.40667	4.13738	7.48686	7.01886	4.43733
6.41	4.67319	4.75468	6.19594	6.72306		6.41	4.13696	7.48528	7.01792	4.43996
6.41333	4.67499	4.75316	6.19825	6.72262		6.41333	4.13958	7.48817	7.02048	4.43964
6.41667	4.67602	4.75511	6.19976	6.73394		6.41667	4.14158	7.49101	7.02138	4.44066
6.42	4.67796	4.75067	6.20132	6.72887		6.42	4.14251	7.48311	7.02294	4.44381
6.42333	4.68008	4.74991	6.20457	6.72551		6.42333	4.14306	7.48645	7.02357	4.44743
6.42667	4.67947	4.74798	6.20299	6.73037		6.42667	4.14606	7.4893	7.02261	4.44853
6.43	4.68612	4.75252	6.20752	6.7252		6.43	4.14655	7.49169	7.02465	4.45323
6.43333	4.67552	4.75408	6.20159	6.73152		6.43333	4.14946	7.48832	7.02213	4.45683
6.43667	4.6785	4.75118	6.20961	6.73354		6.43667	4.15098	7.48823	7.02157	4.45667
6.44	4.68866	4.75874	6.20609	6.7324		6.44	4.15358	7.49177	7.02606	4.45854
6.44333	4.68513	4.76483	6.20584	6.73273		6.44333	4.15341	7.49201	7.02661	4.46095
6.44667	4.6843	4.75544	6.20887	6.73338		6.44667	4.15436	7.49487	7.02579	4.4627
6.45	4.68479	4.76099	6.20723	6.73226		6.45	4.15396	7.49263	7.02778	4.46444
6.45333	4.68387	4.7599	6.20981	6.73069		6.45333	4.15508	7.48744	7.02918	4.46681
6.45667	4.68646	4.75972	6.21293	6.73371		6.45667	4.15523	7.4925	7.02954	4.46744
6.46	4.68939	4.76278	6.20462	6.73023		6.46	4.15698	7.49344	7.02932	4.46733
6.46333	4.68595	4.76605	6.21171	6.73455		6.46333	4.15929	7.49013	7.03026	4.4691
6.46667	4.68702	4.76402	6.2132	6.72969		6.46667	4.16141	7.49368	7.02568	4.4709
6.47	4.69059	4.76236	6.21281	6.73605		6.47	4.16309	7.49086	7.02553	4.47253
6.47333	4.69023	4.76429	6.21451	6.73739		6.47333	4.16527	7.49346	7.0275	4.47451
6.47667	4.6911	4.76397	6.21623	6.73845		6.47667	4.16764	7.49599	7.03352	4.47791
6.48	4.69102	4.76939	6.21621	6.74068		6.48	4.16911	7.49961	7.03253	4.47843
6.48333	4.69241	4.76881	6.21798	6.73784		6.48333	4.1659	7.4956	7.03084	4.47893
6.48667	4.69466	4.76642	6.21619	6.73695		6.48667	4.16702	7.49642	7.029	4.48155
6.49	4.69604	4.76803	6.21417	6.74456		6.49	4.16845	7.49653	7.0344	4.4827
6.49333	4.69585	4.76913	6.21916	6.74106		6.49333	4.17063	7.4952	7.03304	4.48446
6.49667	4.69429	4.76933	6.21337	6.73831		6.49667	4.17065	7.49624	7.03746	4.48742
6.5	4.69517	4.77257	6.21796	6.74174		6.5	4.17552	7.49697	7.0329	4.4895
6.50333	4.69431	4.76955	6.21538	6.74168		6.50333	4.17538	7.50033	7.03841	4.48953
6.50667	4.69519	4.77428	6.21646	6.74273		6.50667	4.17614	7.49897	7.03816	4.49095
6.51	4.69871	4.76573	6.21921	6.74219		6.51	4.17552	7.49967	7.03682	4.49068
6.51333	4.69647	4.77556	6.21928	6.74599		6.51333	4.17756	7.4964	7.03657	4.49174
6.51667	4.6977	4.77633	6.22337	6.73846		6.51667	4.17986	7.49772	7.04094	4.49296
6.52	4.70209	4.77398	6.22432	6.74438		6.52	4.1844	7.49838	7.04052	4.49679
6.52333	4.69864	4.78104	6.22117	6.74361		6.52333	4.18705	7.50356	7.03657	4.50033
6.52667	4.70485	4.77701	6.22095	6.74161		6.52667	4.18867	7.49877	7.04219	4.5026
6.53	4.7014	4.78525	6.22518	6.75192		6.53	4.19377	7.50147	7.04206	4.50465
6.53333	4.7079	4.78041	6.2227	6.74832		6.53333	4.19562	7.50712	7.04518	4.50759
6.53667	4.70243	4.77715	6.22432	6.74915		6.53667	4.19426	7.50067	7.04248	4.51001
6.54	4.70772	4.78035	6.22554	6.74866		6.54	4.1941	7.50134	7.04461	4.50917
6.54333	4.70359	4.78071	6.22393	6.74695		6.54333	4.19536	7.50839	7.04321	4.50969
6.54667	4.70385	4.77926	6.22674	6.74822		6.54667	4.19326	7.5088	7.04385	4.50962
6.55	4.70572	4.78096	6.22818	6.75168		6.55	4.19494	7.50705	7.04202	4.51074
6.55333	4.70546	4.78281	6.23175	6.75403		6.55333	4.19772	7.50227	7.03834	4.51172
6.55667	4.70667	4.77739	6.22716	6.74907		6.55667	4.20039	7.50999	7.04521	4.51518
6.56	4.71044	4.78672	6.22999	6.75201		6.56	4.20147	7.50418	7.04842	4.51793
6.56333	4.71344	4.78296	6.2311	6.75375		6.56333	4.20383	7.50681	7.04476	4.52012
6.56667	4.7142	4.7904	6.23202	6.75775		6.56667	4.20371	7.50635	7.04303	4.52071
6.57	4.71279	4.78772	6.22753	6.75314		6.57	4.20577	7.51291	7.04504	4.51936
6.57333	4.71141	4.79074	6.23176	6.75352		6.57333	4.20666	7.51329	7.0529	4.52032
6.57667	4.71383	4.79342	6.22904	6.75253		6.57667	4.20736	7.50665	7.05338	4.5229
6.58	4.71528	4.79489	6.23628	6.75548		6.58	4.20965	7.51421	7.04911	4.52489
6.58333	4.71277	4.79447	6.2357	6.75515		6.58333	4.21195	7.51232	7.04814	4.5271
6.58667	4.71649	4.79517	6.23675	6.74972		6.58667	4.21228	7.51208	7.05172	4.53067
6.59	4.7157	4.78892	6.23577	6.75283		6.59	4.21355	7.51286	7.05048	4.53008
6.59333	4.71509	4.79655	6.23272	6.7582		6.59333	4.21659	7.51249	7.0557	4.52908
6.59667	4.71784	4.79312	6.2392	6.75493		6.59667	4.21575	7.50946	7.05619	4.53037
6.6	4.71763	4.79294	6.23815	6.75573		6.6	4.2175	7.51214	7.05228	4.53335
6.60333	4.71515	4.79101	6.24244	6.7589		6.60333	4.2192	7.51225	7.05535	4.53599
6.60667	4.72116	4.79654	6.23527	6.75798		6.60667	4.22253	7.5122	7.0551	4.53982
6.61	4.72086	4.79669	6.23915	6.76106		6.61	4.2225	7.51339	7.05818	4.54405
6.61333	4.72067	4.79667	6.23626	6.75874		6.61333	4.22569	7.5111	7.05622	4.54609
6.61667	4.72099	4.79634	6.23933	6.75446		6.61667	4.22556	7.5109	7.05879	4.54816
6.62	4.7192	4.79816	6.23831	6.76127		6.62	4.22682	7.52181	7.05464	4.54814
6.62333	4.71976	4.80009	6.23658	6.75799		6.62333	4.2264	7.51531	7.05694	4.55047
6.62667	4.72329	4.79793	6.23694	6.75579		6.62667	4.22992	7.51695	7.05722	4.54992
6.63	4.72847	4.79875	6.23526	6.76686		6.63	4.22828	7.51731	7.06141	4.55177
6.63333	4.72901	4.80523	6.245	6.76229		6.63333	4.23254	7.51574	7.0589	4.5508
6.63667	4.72261	4.79989	6.2393	6.76669		6.63667	4.23262	7.51599	7.05596	4.55308
6.64	4.72236	4.79886	6.2449	6.76727		6.64	4.23389	7.5224	7.05753	4.55519
6.64333	4.72378	4.80145	6.24896	6.76403		6.64333	4.23302	7.51711	7.06114	4.55898
6.64667	4.72724	4.80081	6.24302	6.7661		6.64667	4.23775	7.51727	7.05474	4.55876
6.65	4.72806	4.80712	6.24209	6.76558		6.65	4.23735	7.52039	7.06448	4.56119
6.65333	4.72699	4.80404	6.24612	6.77082		6.65333	4.23805	7.51237	7.0634	4.56265
6.65667	4.73197	4.80727	6.24842	6.76537		6.65667	4.2393	7.52179	7.06038	4.5639
[truncated: 7,153 more rows]
