# Supplementary material for: Early steps of protein disaggregation by Hsp70 chaperone and class B J-domain proteins are shaped by Hsp110
Source: eLife. 2024 Oct 15;13:RP94795. doi: 10.7554/eLife.94795 (PMC11479587; doi:10.7554/eLife.94795)
Supplement: Figure 1—figure supplement 3—source data 3. [file elife-94795-fig1-figsupp3-data3.xlsx]

## Sheet: Figure 1—figure supplement 3C
Time (min)	Ssa1, Sis1	Ssa1	Sis1, Ssa1488, 1uM Fes1				Fluorescence
0	0	0	0					Ssa1			Ssa1, Sis1
0.003333	-0.00052	-0.00354	-0.00504					107874	49488	98412	185232	194061	227147
0.006667	0.000134	-0.00716	-0.01278
0.01	0.000151	-0.00678	-0.01075
0.013333	-0.0012	-0.00753	-0.01085
0.016667	-0.00306	-0.00818	-0.01096
0.02	-0.00458	-0.00769	-0.00764
0.023333	-0.00439	-0.0137	-0.00499
0.026667	-0.00565	-0.01779	-0.00833
0.03	-0.00695	-0.01937	-0.00944
0.033333	-0.00689	-0.02227	-0.00976
0.036667	-0.00325	-0.02567	-0.01283
0.04	-0.00296	-0.02725	-0.01402
0.043333	-0.00202	-0.02576	-0.01188
0.046667	-0.00261	-0.02901	-0.01295
0.05	-0.0032	-0.02864	-0.01499
0.053333	-0.00675	-0.03189	-0.01662
0.056667	-0.00686	-0.02812	-0.01585
0.06	-0.00468	-0.03185	-0.01648
0.063333	-0.00366	-0.03481	-0.01457
0.066667	-0.00545	-0.03709	-0.01611
0.07	-0.00043	-0.03614	-0.01423
0.073333	-0.00496	-0.03887	-0.0123
0.076667	-0.00636	-0.03738	-0.01416
0.08	-0.00801	-0.03627	-0.01482
0.083333	-0.00358	-0.03865	-0.01368
0.086667	-0.0072	-0.04044	-0.01301
0.09	-0.00423	-0.04144	-0.01511
0.093333	-0.00654	-0.0475	-0.01301
0.096667	-0.00166	-0.05009	-0.01581
0.1	-0.00212	-0.04691	-0.01711
0.103333	-0.00393	-0.04535	-0.02141
0.106667	-0.00502	-0.04496	-0.02247
0.11	-0.00437	-0.0427	-0.02863
0.113333	-0.00975	-0.04074	-0.02924
0.116667	-0.01238	-0.04651	-0.02812
0.12	-0.00968	-0.04626	-0.02781
0.123333	-0.00811	-0.04734	-0.03101
0.126667	-0.00531	-0.04596	-0.02912
0.13	-0.00506	-0.04435	-0.0289
0.133333	-0.00255	-0.04204	-0.02796
0.136667	-0.00181	-0.04273	-0.02457
0.14	-0.00385	-0.04425	-0.024
0.143333	-0.00615	-0.04578	-0.02464
0.146667	-0.0026	-0.04961	-0.02456
0.15	-0.00415	-0.04631	-0.02832
0.153333	-0.00563	-0.05003	-0.03459
0.156667	-0.00517	-0.04719	-0.03469
0.16	-0.00502	-0.04575	-0.03429
0.163333	-0.00454	-0.04506	-0.03747
0.166667	-0.00492	-0.05048	-0.03742
0.17	-0.00667	-0.04819	-0.03565
0.173333	-0.00727	-0.0462	-0.03855
0.176667	-0.00634	-0.05055	-0.03951
0.18	-0.00797	-0.04795	-0.04017
0.183333	-0.00691	-0.04764	-0.03908
0.186667	-0.00613	-0.05062	-0.03678
0.19	-0.00479	-0.05582	-0.03416
0.193333	-0.00478	-0.05016	-0.034
0.196667	-0.00559	-0.0543	-0.02963
0.2	-0.00436	-0.05116	-0.03214
0.203333	-0.00441	-0.04991	-0.03486
0.206667	-0.00497	-0.05001	-0.03453
0.21	-0.00523	-0.05421	-0.0322
0.213333	-0.00416	-0.05258	-0.03518
0.216667	-0.00543	-0.05176	-0.03252
0.22	-0.00628	-0.0495	-0.03102
0.223333	-0.00682	-0.0497	-0.03004
0.226667	-0.00752	-0.05096	-0.03011
0.23	-0.00734	-0.04774	-0.03099
0.233333	-0.00686	-0.05198	-0.03362
0.236667	-0.00761	-0.05088	-0.03646
0.24	-0.0065	-0.04744	-0.0384
0.243333	-0.00726	-0.04523	-0.04249
0.246667	-0.00735	-0.04698	-0.04004
0.25	-0.0081	-0.04672	-0.03521
0.253333	-0.00739	-0.05058	-0.0311
0.256667	-0.00967	-0.0542	-0.02975
0.26	-0.01158	-0.05588	-0.03015
0.263333	-0.01116	-0.05809	-0.02914
0.266667	-0.0125	-0.0577	-0.03072
0.27	-0.01264	-0.05693	-0.03117
0.273333	-0.01371	-0.05589	-0.03224
0.276667	-0.01231	-0.05691	-0.02924
0.28	-0.01607	-0.05431	-0.03254
0.283333	-0.01631	-0.0537	-0.03439
0.286667	-0.01552	-0.05475	-0.03753
0.29	-0.01307	-0.05597	-0.04318
0.293333	-0.01442	-0.05247	-0.04632
0.296667	-0.01094	-0.057	-0.04389
0.3	-0.00892	-0.0611	-0.0411
0.303333	-0.00761	-0.06047	-0.0411
0.306667	-0.00627	-0.06054	-0.03658
0.31	-0.00389	-0.06541	-0.03583
0.313333	-0.00394	-0.06415	-0.0375
0.316667	-0.00299	-0.06224	-0.04315
0.32	-0.00373	-0.06496	-0.04527
0.323333	-0.00406	-0.0682	-0.0465
0.326667	-0.00516	-0.06867	-0.04711
0.33	-0.00466	-0.07204	-0.04735
0.333333	-0.00461	-0.07449	-0.04535
0.336667	-0.00617	-0.07715	-0.04194
0.34	-0.00774	-0.07716	-0.03783
0.343333	-0.00847	-0.07832	-0.03719
0.346667	-0.00866	-0.07903	-0.04058
0.35	-0.01106	-0.08289	-0.04614
0.353333	-0.01374	-0.08507	-0.05069
0.356667	-0.01219	-0.08739	-0.05503
0.36	-0.01029	-0.08766	-0.057
0.363333	-0.0112	-0.09145	-0.05855
0.366667	-0.00945	-0.09297	-0.05343
0.37	-0.00666	-0.09313	-0.05266
0.373333	-0.00681	-0.09369	-0.05139
0.376667	-0.00803	-0.097	-0.05068
0.38	-0.00989	-0.09836	-0.04991
0.383333	-0.01007	-0.10002	-0.05168
0.386667	-0.00968	-0.10317	-0.05025
0.39	-0.01066	-0.10876	-0.05032
0.393333	-0.01287	-0.11406	-0.0495
0.396667	-0.01244	-0.11743	-0.04679
0.4	-0.01465	-0.11968	-0.04838
0.403333	-0.01748	-0.12363	-0.05022
0.406667	-0.01617	-0.12343	-0.05323
0.41	-0.01396	-0.12351	-0.05416
0.413333	-0.01295	-0.12487	-0.05663
0.416667	-0.01242	-0.12788	-0.05113
0.42	-0.01034	-0.12845	-0.05351
0.423333	-0.01125	-0.1301	-0.05382
0.426667	-0.01326	-0.13454	-0.05824
0.43	-0.01349	-0.13899	-0.05517
0.433333	-0.0135	-0.13665	-0.06159
0.436667	-0.01324	-0.13619	-0.05753
0.44	-0.01246	-0.141	-0.0611
0.443333	-0.01099	-0.13899	-0.05948
0.446667	-0.00981	-0.13793	-0.06179
0.45	-0.00972	-0.14073	-0.06121
0.453333	-0.01175	-0.14128	-0.06565
0.456667	-0.01283	-0.13965	-0.06318
0.46	-0.01431	-0.14224	-0.06155
0.463333	-0.01595	-0.13843	-0.06403
0.466667	-0.01443	-0.13771	-0.06465
0.47	-0.01412	-0.1405	-0.06299
0.473333	-0.01466	-0.14087	-0.06432
0.476667	-0.01345	-0.13955	-0.06331
0.48	-0.01453	-0.14439	-0.06163
0.483333	-0.01749	-0.14676	-0.06101
0.486667	-0.01811	-0.14642	-0.06258
0.49	-0.01952	-0.14543	-0.06113
0.493333	-0.01902	-0.14623	-0.06544
0.496667	-0.0162	-0.14649	-0.06586
0.5	0.174379	-0.11953	-0.09007
0.503333	0.176236	-0.13043	-0.072
0.506667	0.194026	-0.13392	-0.07338
0.51	0.205694	-0.14307	-0.06766
0.513333	0.212776	-0.13189	-0.06484
0.516667	0.218644	-0.13556	-0.05993
0.52	0.225344	-0.13593	-0.05909
0.523333	0.225682	-0.13516	-0.05626
0.526667	0.224291	-0.13254	-0.05416
0.53	0.223371	-0.13548	-0.05239
0.533333	0.222468	-0.13096	-0.05076
0.536667	0.222496	-0.13063	-0.05017
0.54	0.222956	-0.12597	-0.04897
0.543333	0.218833	-0.1268	-0.04865
0.546667	0.218379	-0.12627	-0.0476
0.55	0.219108	-0.13191	-0.04696
0.553333	0.219691	-0.13364	-0.04528
0.556667	0.219009	-0.14074	-0.04488
0.56	0.227551	-0.14186	-0.04362
0.563333	0.22748	-0.14383	-0.04471
0.566667	0.22865	-0.14495	-0.04521
0.57	0.227056	-0.14503	-0.04315
0.573333	0.229083	-0.14495	-0.04159
0.576667	0.231895	-0.14735	-0.04169
0.58	0.232973	-0.14848	-0.03998
0.583333	0.234832	-0.1461	-0.03922
0.586667	0.239159	-0.1456	-0.03713
0.59	0.238258	-0.14519	-0.03448
0.593333	0.232826	-0.14282	-0.03323
0.596667	0.234559	-0.14021	-0.03153
0.6	0.234499	-0.14216	-0.02857
0.603333	0.231652	-0.14157	-0.02957
0.606667	0.23123	-0.14361	-0.03127
0.61	0.237997	-0.14413	-0.03078
0.613333	0.238722	-0.14491	-0.03049
0.616667	0.237777	-0.14476	-0.03017
0.62	0.238893	-0.14445	-0.02895
0.623333	0.242978	-0.14054	-0.02786
0.626667	0.239107	-0.13862	-0.02643
0.63	0.240175	-0.13862	-0.02428
0.633333	0.241122	-0.13932	-0.02511
0.636667	0.242081	-0.14187	-0.02485
0.64	0.239576	-0.14138	-0.02372
0.643333	0.242042	-0.14388	-0.02474
0.646667	0.241913	-0.14355	-0.02583
0.65	0.242366	-0.14527	-0.02419
0.653333	0.239526	-0.14127	-0.02329
0.656667	0.241217	-0.14374	-0.02295
0.66	0.238584	-0.14316	-0.01975
0.663333	0.239893	-0.14526	-0.01813
0.666667	0.242085	-0.14283	-0.01745
0.67	0.244662	-0.14525	-0.01659
0.673333	0.244963	-0.14211	-0.01756
0.676667	0.24876	-0.1417	-0.01847
0.68	0.248747	-0.13879	-0.01876
0.683333	0.248575	-0.13665	-0.01926
0.686667	0.247208	-0.13436	-0.01979
0.69	0.247766	-0.13791	-0.01921
0.693333	0.244021	-0.13727	-0.01812
0.696667	0.245664	-0.13826	-0.01754
0.7	0.247636	-0.14133	-0.01639
0.703333	0.252196	-0.14247	-0.01685
0.706667	0.251759	-0.14199	-0.01445
0.71	0.255906	-0.143	-0.01527
0.713333	0.256824	-0.1421	-0.01594
0.716667	0.252707	-0.14076	-0.01505
0.72	0.252191	-0.14055	-0.0148
0.723333	0.250795	-0.1405	-0.01661
0.726667	0.247035	-0.13902	-0.0173
0.73	0.245404	-0.1391	-0.01729
0.733333	0.249281	-0.13972	-0.01788
0.736667	0.24454	-0.14122	-0.01558
0.74	0.246752	-0.13966	-0.01624
0.743333	0.249268	-0.14045	-0.01209
0.746667	0.251553	-0.14071	-0.01192
0.75	0.250971	-0.14023	-0.01034
0.753333	0.255655	-0.13632	-0.01165
0.756667	0.253989	-0.13752	-0.0106
0.76	0.254348	-0.13288	-0.01213
0.763333	0.25145	-0.13019	-0.01111
0.766667	0.250063	-0.12713	-0.01086
0.77	0.248163	-0.13056	-0.00894
0.773333	0.252724	-0.12829	-0.00786
0.776667	0.250865	-0.13095	-0.00781
0.78	0.252676	-0.12901	-0.0075
0.783333	0.251735	-0.13054	-0.00713
0.786667	0.251799	-0.12863	-0.00861
0.79	0.253239	-0.12844	-0.00844
0.793333	0.256969	-0.12858	-0.00854
0.796667	0.25497	-0.13298	-0.00711
0.8	0.258307	-0.13311	-0.00942
0.803333	0.260974	-0.13382	-0.00703
0.806667	0.262287	-0.13337	-0.00504
0.81	0.259594	-0.13346	-0.0051
0.813333	0.262486	-0.13113	-0.00503
0.816667	0.260824	-0.13145	-0.0013
0.82	0.262686	-0.12793	-0.00176
0.823333	0.258392	-0.12953	-0.00232
0.826667	0.259945	-0.13038	-0.00329
0.83	0.257148	-0.1324	-0.00318
0.833333	0.259598	-0.13175	-0.00463
0.836667	0.256382	-0.13272	-0.00396
0.84	0.258824	-0.1326	-0.00261
0.843333	0.255285	-0.13074	-8e-06
0.846667	0.259521	-0.12915	-0.00073
0.85	0.256614	-0.12865	-0.00038
0.853333	0.259959	-0.12772	9.09e-05
0.856667	0.260706	-0.12711	-0.00252
0.86	0.263727	-0.12581	-0.00407
0.863333	0.261892	-0.12597	-0.00314
0.866667	0.266083	-0.12474	-0.00168
0.87	0.267621	-0.12438	-0.00295
0.873333	0.269004	-0.12417	-0.00026
0.876667	0.272435	-0.12392	0.000322
0.88	0.270136	-0.1216	0.002063
0.883333	0.26603	-0.11971	0.001
0.886667	0.265698	-0.12331	-0.00035
0.89	0.264351	-0.1219	-0.00125
0.893333	0.263856	-0.12162	-0.00097
0.896667	0.264125	-0.12331	-0.00283
0.9	0.269028	-0.12633	-0.00265
0.903333	0.267952	-0.12506	0.001452
0.906667	0.265704	-0.12472	0.000862
0.91	0.258092	-0.12467	0.002267
0.913333	0.259348	-0.12196	0.004202
0.916667	0.255178	-0.12497	0.004863
0.92	0.252729	-0.1239	0.003667
0.923333	0.253847	-0.126	0.003512
0.926667	0.262968	-0.12749	0.003836
0.93	0.263717	-0.1317	0.00285
0.933333	0.264398	-0.1294	0.002998
0.936667	0.262237	-0.1299	0.00422
0.94	0.260518	-0.12911	0.006348
0.943333	0.257794	-0.13038	0.007771
0.946667	0.259017	-0.12872	0.007861
0.95	0.258364	-0.12725	0.006964
0.953333	0.265103	-0.12769	0.008646
0.956667	0.268934	-0.12556	0.009383
0.96	0.269113	-0.12647	0.009298
0.963333	0.26605	-0.12987	0.008559
0.966667	0.26577	-0.12928	0.010365
0.97	0.26394	-0.12753	0.008121
0.973333	0.258903	-0.12882	0.00796
0.976667	0.256509	-0.12622	0.007352
0.98	0.260101	-0.1212	0.009003
0.983333	0.263006	-0.12357	0.008883
0.986667	0.259908	-0.12596	0.011533
0.99	0.263618	-0.12482	0.012603
0.993333	0.265086	-0.12543	0.012713
0.996667	0.263106	-0.12644	0.014482
1	0.262992	-0.12536	0.015876
1.00333	0.268914	-0.12705	0.012129
1.00667	0.270102	-0.12834	0.011555
1.01	0.270974	-0.12762	0.012377
1.01333	0.272647	-0.12483	0.011266
1.01667	0.271956	-0.12668	0.010678
1.02	0.272472	-0.11931	0.013223
1.02333	0.270525	-0.12172	0.014045
1.02667	0.267478	-0.1249	0.014842
1.03	0.265479	-0.12748	0.016325
1.03333	0.26711	-0.12708	0.016313
1.03667	0.262199	-0.1308	0.017539
1.04	0.262741	-0.12844	0.016906
1.04333	0.265596	-0.12719	0.016607
1.04667	0.266335	-0.1284	0.017649
1.05	0.261986	-0.12722	0.016517
1.05333	0.267264	-0.12619	0.017966
1.05667	0.268362	-0.12599	0.019937
1.06	0.271477	-0.12325	0.022158
1.06333	0.272822	-0.12164	0.018237
1.06667	0.27668	-0.12106	0.019948
1.07	0.271731	-0.12224	0.018366
1.07333	0.273004	-0.12143	0.018121
1.07667	0.263971	-0.12247	0.016781
1.08	0.26364	-0.12317	0.01994
1.08333	0.266896	-0.12251	0.02099
1.08667	0.267549	-0.12205	0.023977
1.09	0.264549	-0.12027	0.021845
1.09333	0.274624	-0.12079	0.024664
1.09667	0.275393	-0.11963	0.02521
1.1	0.273321	-0.11995	0.025987
1.10333	0.275274	-0.1187	0.023926
1.10667	0.276478	-0.11931	0.026313
1.11	0.274133	-0.11688	0.02409
1.11333	0.27416	-0.11802	0.023587
1.11667	0.273146	-0.11753	0.024381
1.12	0.27121	-0.11722	0.02505
1.12333	0.272692	-0.11648	0.025229
1.12667	0.274249	-0.11826	0.024647
1.13	0.272994	-0.11521	0.027582
1.13333	0.270425	-0.11638	0.02627
1.13667	0.275149	-0.11551	0.025905
1.14	0.277189	-0.11827	0.026236
1.14333	0.276988	-0.11568	0.028488
1.14667	0.280382	-0.11901	0.027358
1.15	0.279078	-0.11829	0.029113
1.15333	0.278308	-0.11926	0.030753
1.15667	0.277113	-0.11866	0.029544
1.16	0.26998	-0.12104	0.028478
1.16333	0.264067	-0.11793	0.029014
1.16667	0.2709	-0.11545	0.028551
1.17	0.270548	-0.11713	0.028759
1.17333	0.266328	-0.11772	0.030254
1.17667	0.272491	-0.11613	0.032197
1.18	0.277558	-0.11758	0.032111
1.18333	0.272883	-0.11748	0.033171
1.18667	0.272971	-0.1161	0.032591
1.19	0.279404	-0.11357	0.033859
1.19333	0.280543	-0.11459	0.031659
1.19667	0.28039	-0.11414	0.033061
1.2	0.285934	-0.11617	0.032162
1.20333	0.288596	-0.11436	0.033234
1.20667	0.288594	-0.11395	0.032879
1.21	0.287308	-0.11318	0.035494
1.21333	0.286608	-0.11406	0.033596
1.21667	0.281197	-0.11297	0.035468
1.22	0.282706	-0.11518	0.036315
1.22333	0.27834	-0.11601	0.036199
1.22667	0.279394	-0.11572	0.035987
1.23	0.281065	-0.11449	0.038988
1.23333	0.283365	-0.11462	0.037124
1.23667	0.277587	-0.114	0.036119
1.24	0.278919	-0.11297	0.035931
1.24333	0.273385	-0.11371	0.035308
1.24667	0.269149	-0.11499	0.034596
1.25	0.269677	-0.11513	0.038844
1.25333	0.270014	-0.11556	0.037663
1.25667	0.271142	-0.11623	0.041509
1.26	0.276469	-0.11555	0.043363
1.26333	0.277693	-0.11419	0.04349
1.26667	0.274975	-0.114	0.04145
1.27	0.279858	-0.11208	0.043891
1.27333	0.277442	-0.11223	0.041203
1.27667	0.276825	-0.11147	0.040585
1.28	0.282423	-0.10893	0.041939
1.28333	0.286186	-0.10735	0.041274
1.28667	0.280546	-0.105	0.041649
1.29	0.274999	-0.10618	0.043627
1.29333	0.272081	-0.10284	0.044768
1.29667	0.265701	-0.10498	0.043992
1.3	0.264386	-0.10645	0.044216
1.30333	0.267165	-0.10661	0.044968
1.30667	0.278424	-0.1044	0.045195
1.31	0.283779	-0.10754	0.045584
1.31333	0.287968	-0.10762	0.045904
1.31667	0.289833	-0.1068	0.047575
1.32	0.293288	-0.10869	0.048165
1.32333	0.290895	-0.10755	0.048508
1.32667	0.290848	-0.11005	0.047388
1.33	0.29021	-0.11012	0.049056
1.33333	0.289985	-0.11059	0.046838
1.33667	0.289657	-0.11258	0.046353
1.34	0.291149	-0.11605	0.048969
1.34333	0.287707	-0.11332	0.049932
1.34667	0.289157	-0.11231	0.048183
1.35	0.291031	-0.11109	0.051073
1.35333	0.28923	-0.10995	0.052724
1.35667	0.283287	-0.10747	0.05181
1.36	0.284914	-0.10695	0.052655
1.36333	0.285043	-0.10546	0.05432
1.36667	0.285536	-0.1047	0.055849
1.37	0.279927	-0.10432	0.055124
1.37333	0.282397	-0.10436	0.056388
1.37667	0.282478	-0.10353	0.055554
1.38	0.280615	-0.10423	0.054915
1.38333	0.274967	-0.10511	0.053941
1.38667	0.279578	-0.10439	0.0539
1.39	0.281199	-0.10294	0.050946
1.39333	0.283582	-0.1041	0.052513
1.39667	0.284903	-0.10585	0.053828
1.4	0.290304	-0.10553	0.053859
1.40333	0.290952	-0.10417	0.056825
1.40667	0.284844	-0.10387	0.057149
1.41	0.280584	-0.10302	0.057731
1.41333	0.28234	-0.10145	0.057666
1.41667	0.28137	-0.10201	0.057674
1.42	0.279662	-0.10346	0.05605
1.42333	0.284266	-0.10428	0.057429
1.42667	0.286196	-0.10482	0.057197
1.43	0.281861	-0.10654	0.05747
1.43333	0.27966	-0.10503	0.059077
1.43667	0.279956	-0.10484	0.059317
1.44	0.277677	-0.1069	0.06063
1.44333	0.276319	-0.10614	0.061136
1.44667	0.280211	-0.10588	0.063063
1.45	0.279877	-0.10701	0.060926
1.45333	0.283941	-0.10675	0.061725
1.45667	0.283172	-0.105	0.064007
1.46	0.283376	-0.10531	0.062349
1.46333	0.285045	-0.1033	0.062814
1.46667	0.28851	-0.1033	0.065235
1.47	0.283973	-0.10297	0.065209
1.47333	0.285526	-0.10067	0.062935
1.47667	0.286615	-0.10223	0.066297
1.48	0.281779	-0.10412	0.067357
1.48333	0.279392	-0.10459	0.066965
1.48667	0.280527	-0.10489	0.07059
1.49	0.280331	-0.10664	0.068364
1.49333	0.280825	-0.10442	0.068562
1.49667	0.282506	-0.1033	0.068456
1.5	0.282814	-0.1025	0.070034
1.50333	0.282156	-0.10228	0.067479
1.50667	0.287914	-0.10319	0.071065
1.51	0.287897	-0.10277	0.07234
1.51333	0.289153	-0.10214	0.070745
1.51667	0.294227	-0.10043	0.071434
1.52	0.298061	-0.09921	0.072142
1.52333	0.298155	-0.09693	0.073205
1.52667	0.301002	-0.09505	0.073042
1.53	0.302884	-0.09409	0.074631
1.53333	0.298301	-0.09203	0.073588
1.53667	0.296502	-0.09207	0.074117
1.54	0.293484	-0.09324	0.07535
1.54333	0.289257	-0.09584	0.075282
1.54667	0.289762	-0.09794	0.075661
1.55	0.29285	-0.10013	0.075988
1.55333	0.294989	-0.1011	0.077547
1.55667	0.294515	-0.10067	0.075462
1.56	0.29942	-0.10236	0.075707
1.56333	0.295611	-0.10177	0.075229
1.56667	0.293249	-0.10154	0.0771
1.57	0.28895	-0.10164	0.076512
1.57333	0.286933	-0.10292	0.076054
1.57667	0.283534	-0.10101	0.076008
1.58	0.286697	-0.0987	0.076811
1.58333	0.289159	-0.09789	0.078324
1.58667	0.294342	-0.09856	0.080648
1.59	0.299961	-0.09498	0.08192
1.59333	0.29837	-0.09535	0.081436
1.59667	0.293507	-0.09605	0.08183
1.6	0.291334	-0.09664	0.080506
1.60333	0.289593	-0.09565	0.080196
1.60667	0.286343	-0.09824	0.080579
1.61	0.286759	-0.09669	0.082528
1.61333	0.289785	-0.09704	0.084188
1.61667	0.289664	-0.09497	0.086639
1.62	0.288552	-0.09589	0.08708
1.62333	0.288397	-0.09389	0.087602
1.62667	0.295853	-0.09457	0.088948
1.63	0.298369	-0.0954	0.088927
1.63333	0.301748	-0.09709	0.088207
1.63667	0.302826	-0.09582	0.087887
1.64	0.310323	-0.09617	0.086918
1.64333	0.303625	-0.09414	0.087394
1.64667	0.299325	-0.09437	0.087697
1.65	0.298595	-0.09336	0.087737
1.65333	0.302449	-0.09273	0.088897
1.65667	0.300556	-0.0913	0.091835
1.66	0.306519	-0.09107	0.092729
1.66333	0.31428	-0.09122	0.091583
1.66667	0.314369	-0.09409	0.092651
1.67	0.314186	-0.09266	0.092357
1.67333	0.313018	-0.09525	0.091623
1.67667	0.308383	-0.09688	0.090575
1.68	0.300466	-0.09403	0.092865
1.68333	0.302191	-0.09249	0.092288
1.68667	0.300714	-0.09268	0.093416
1.69	0.300705	-0.08998	0.09528
1.69333	0.300191	-0.09025	0.095727
1.69667	0.301834	-0.09061	0.095262
1.7	0.300182	-0.09154	0.097395
1.70333	0.299605	-0.0923	0.098365
1.70667	0.294083	-0.0941	0.099701
1.71	0.297637	-0.09412	0.099635
1.71333	0.300338	-0.09754	0.100517
1.71667	0.296453	-0.09735	0.099032
1.72	0.296709	-0.09719	0.097802
1.72333	0.3004	-0.09626	0.095777
1.72667	0.30082	-0.09517	0.097279
1.73	0.300695	-0.09217	0.097002
1.73333	0.308468	-0.08984	0.099707
1.73667	0.308277	-0.09035	0.100465
1.74	0.310918	-0.09028	0.103588
1.74333	0.306862	-0.09004	0.102694
1.74667	0.311995	-0.09007	0.104813
1.75	0.310448	-0.08795	0.103418
1.75333	0.309045	-0.08657	0.103319
1.75667	0.304942	-0.08622	0.103296
1.76	0.308776	-0.08782	0.104369
1.76333	0.301779	-0.08796	0.105085
1.76667	0.294054	-0.09154	0.107287
1.77	0.295662	-0.091	0.109017
1.77333	0.299724	-0.09072	0.108598
1.77667	0.302822	-0.08952	0.109625
1.78	0.302931	-0.0879	0.108895
1.78333	0.307681	-0.08653	0.108748
1.78667	0.305849	-0.08825	0.110016
1.79	0.30459	-0.08726	0.110581
1.79333	0.298355	-0.0855	0.109622
1.79667	0.300845	-0.08528	0.11079
1.8	0.304467	-0.08604	0.109271
1.80333	0.305985	-0.08433	0.109686
1.80667	0.308697	-0.08755	0.108647
1.81	0.311154	-0.08845	0.111808
1.81333	0.311958	-0.09212	0.111603
1.81667	0.311608	-0.09191	0.114827
1.82	0.313748	-0.09347	0.116818
1.82333	0.311311	-0.09267	0.11888
1.82667	0.312909	-0.09548	0.118194
1.83	0.316391	-0.09183	0.119934
1.83333	0.31646	-0.09206	0.119257
1.83667	0.317368	-0.09263	0.117492
1.84	0.319667	-0.09361	0.117317
1.84333	0.315007	-0.09116	0.117246
1.84667	0.310591	-0.09161	0.117066
1.85	0.306231	-0.08864	0.118125
1.85333	0.307548	-0.08734	0.118224
1.85667	0.302574	-0.08401	0.118139
1.86	0.306268	-0.08356	0.118728
1.86333	0.308436	-0.08361	0.12091
1.86667	0.31237	-0.08555	0.120787
1.87	0.307434	-0.086	0.121753
1.87333	0.310221	-0.08522	0.122907
1.87667	0.30861	-0.08499	0.123745
1.88	0.305771	-0.08723	0.121877
1.88333	0.303468	-0.08699	0.12159
1.88667	0.306694	-0.08479	0.122402
1.89	0.304936	-0.08613	0.124346
1.89333	0.312505	-0.08612	0.12535
1.89667	0.314464	-0.0831	0.126111
1.9	0.315363	-0.08443	0.126548
1.90333	0.314382	-0.0852	0.127272
1.90667	0.316374	-0.08358	0.127213
1.91	0.309896	-0.08206	0.127349
1.91333	0.309371	-0.08096	0.127637
1.91667	0.311379	-0.08029	0.128333
1.92	0.310208	-0.07923	0.128473
1.92333	0.312517	-0.0818	0.128148
1.92667	0.316497	-0.08511	0.127463
1.93	0.316467	-0.08543	0.127343
1.93333	0.313579	-0.08505	0.127598
1.93667	0.315863	-0.08778	0.128521
1.94	0.318703	-0.08742	0.12843
1.94333	0.319156	-0.08469	0.1298
1.94667	0.321116	-0.0851	0.131599
1.95	0.324092	-0.08539	0.133606
1.95333	0.323813	-0.084	0.133887
1.95667	0.319504	-0.08216	0.13625
1.96	0.314696	-0.08152	0.136194
1.96333	0.313891	-0.08167	0.137551
1.96667	0.314615	-0.07952	0.138652
1.97	0.315239	-0.07898	0.139842
1.97333	0.318516	-0.08129	0.139321
1.97667	0.320797	-0.08302	0.140389
1.98	0.321908	-0.0843	0.140411
1.98333	0.321229	-0.08518	0.138584
1.98667	0.320361	-0.08777	0.137565
1.99	0.319965	-0.08855	0.137341
1.99333	0.323791	-0.09077	0.138991
1.99667	0.324364	-0.09142	0.139683
2	0.324963	-0.09364	0.140484
2.00333	0.325498	-0.09282	0.143148
2.00667	0.321956	-0.09187	0.14216
2.01	0.315429	-0.08728	0.141503
2.01333	0.315578	-0.08674	0.141479
2.01667	0.313802	-0.08467	0.142826
2.02	0.316068	-0.08262	0.141389
2.02333	0.319035	-0.08381	0.143454
2.02667	0.324547	-0.08812	0.146103
2.03	0.323226	-0.08891	0.145431
2.03333	0.324956	-0.09011	0.145959
2.03667	0.321653	-0.093	0.148101
2.04	0.325907	-0.09172	0.149234
2.04333	0.325717	-0.09009	0.147842
2.04667	0.323238	-0.0893	0.149268
2.05	0.32001	-0.08993	0.150225
2.05333	0.322552	-0.08857	0.149201
2.05667	0.315253	-0.08824	0.149099
2.06	0.318614	-0.08882	0.150126
2.06333	0.3216	-0.08761	0.150018
2.06667	0.322959	-0.08791	0.15164
2.07	0.31827	-0.08561	0.152883
2.07333	0.321927	-0.08594	0.154146
2.07667	0.314167	-0.08423	0.153898
2.08	0.316893	-0.08358	0.156104
2.08333	0.319033	-0.08216	0.15486
2.08667	0.324388	-0.08471	0.155137
2.09	0.324748	-0.08517	0.155072
2.09333	0.326626	-0.08451	0.155538
2.09667	0.325247	-0.08628	0.154032
2.1	0.326807	-0.08557	0.155583
2.10333	0.326913	-0.0844	0.157649
2.10667	0.326234	-0.08236	0.158834
2.11	0.32831	-0.0847	0.159177
2.11333	0.331369	-0.08435	0.161425
2.11667	0.332109	-0.08579	0.162512
2.12	0.333536	-0.08355	0.162549
2.12333	0.332059	-0.08439	0.163368
2.12667	0.329924	-0.0863	0.163761
2.13	0.3205	-0.08643	0.163023
2.13333	0.319246	-0.0862	0.163992
2.13667	0.320065	-0.08886	0.163661
2.14	0.325047	-0.09078	0.163651
2.14333	0.328215	-0.08716	0.164678
2.14667	0.335231	-0.08746	0.165739
2.15	0.334639	-0.08643	0.16376
2.15333	0.329586	-0.08449	0.163933
2.15667	0.328123	-0.08138	0.163788
2.16	0.330122	-0.08078	0.165769
2.16333	0.328831	-0.07902	0.165154
2.16667	0.328141	-0.07678	0.166733
2.17	0.331078	-0.07702	0.168865
2.17333	0.33159	-0.07851	0.170977
2.17667	0.32879	-0.07871	0.169559
2.18	0.331054	-0.07827	0.170702
2.18333	0.332607	-0.0775	0.171685
2.18667	0.332897	-0.07842	0.171579
2.19	0.331738	-0.07644	0.171202
2.19333	0.330101	-0.07996	0.172806
2.19667	0.326167	-0.07951	0.174107
2.2	0.326282	-0.08283	0.174274
2.20333	0.324668	-0.08404	0.17546
2.20667	0.326804	-0.08464	0.175641
2.21	0.329375	-0.08149	0.178222
2.21333	0.333002	-0.08398	0.178626
2.21667	0.334989	-0.08388	0.178826
2.22	0.337994	-0.08413	0.179295
2.22333	0.336423	-0.08365	0.181952
2.22667	0.339291	-0.08233	0.181598
2.23	0.337611	-0.08167	0.1815
2.23333	0.332802	-0.08215	0.182054
2.23667	0.332081	-0.08192	0.182564
2.24	0.33281	-0.08155	0.183105
2.24333	0.328653	-0.08098	0.183181
2.24667	0.32463	-0.0799	0.185107
2.25	0.327093	-0.07778	0.18621
2.25333	0.326958	-0.07602	0.187244
2.25667	0.329052	-0.07738	0.186697
2.26	0.329349	-0.08092	0.18696
2.26333	0.331191	-0.08018	0.186922
2.26667	0.33742	-0.08103	0.186986
2.27	0.339824	-0.08052	0.188457
2.27333	0.337193	-0.08106	0.189398
2.27667	0.342477	-0.08019	0.191445
2.28	0.34745	-0.08057	0.192191
2.28333	0.339809	-0.08099	0.193513
2.28667	0.337899	-0.08214	0.194151
2.29	0.336612	-0.08163	0.194165
2.29333	0.333871	-0.08126	0.193167
2.29667	0.330904	-0.08162	0.193805
2.3	0.335696	-0.08134	0.194167
2.30333	0.337122	-0.08078	0.194108
2.30667	0.340837	-0.07816	0.194486
2.31	0.343098	-0.07846	0.194379
2.31333	0.344609	-0.07859	0.195785
2.31667	0.342715	-0.07741	0.195115
2.32	0.338767	-0.07886	0.195046
2.32333	0.338107	-0.0798	0.195243
2.32667	0.335886	-0.08021	0.195881
2.33	0.33235	-0.07856	0.195128
2.33333	0.333585	-0.07935	0.196944
2.33667	0.333975	-0.07626	0.198294
2.34	0.334785	-0.07607	0.199138
2.34333	0.330992	-0.07492	0.200431
2.34667	0.336332	-0.07672	0.201864
2.35	0.338239	-0.07819	0.202091
2.35333	0.339786	-0.07844	0.203081
2.35667	0.337362	-0.07756	0.204428
2.36	0.340965	-0.07558	0.205309
2.36333	0.345051	-0.0728	0.206196
2.36667	0.344724	-0.07037	0.207082
2.37	0.344756	-0.07023	0.207525
2.37333	0.345839	-0.07138	0.209132
2.37667	0.34587	-0.07396	0.20861
2.38	0.341662	-0.07627	0.208259
2.38333	0.341242	-0.07688	0.208765
2.38667	0.343042	-0.07983	0.209725
2.39	0.342107	-0.08039	0.208847
2.39333	0.344543	-0.07666	0.210498
2.39667	0.343873	-0.07641	0.210845
2.4	0.343901	-0.07483	0.212952
2.40333	0.342415	-0.07203	0.213222
2.40667	0.34678	-0.06991	0.214879
2.41	0.347462	-0.07065	0.214704
2.41333	0.344474	-0.06849	0.214377
2.41667	0.345251	-0.0697	0.213736
2.42	0.345165	-0.06963	0.215062
2.42333	0.341346	-0.07118	0.214855
2.42667	0.340764	-0.07029	0.215514
2.43	0.342907	-0.06965	0.218134
2.43333	0.339293	-0.06747	0.219625
2.43667	0.335265	-0.06708	0.219803
2.44	0.335909	-0.06814	0.220647
2.44333	0.332024	-0.06881	0.221378
2.44667	0.332021	-0.06874	0.222452
2.45	0.331656	-0.0711	0.223041
2.45333	0.33783	-0.07026	0.223317
2.45667	0.337381	-0.06785	0.223832
2.46	0.343527	-0.06868	0.225053
2.46333	0.345706	-0.07183	0.225121
2.46667	0.349716	-0.06777	0.225381
2.47	0.352069	-0.07097	0.224209
2.47333	0.357902	-0.07315	0.224658
2.47667	0.358031	-0.07202	0.224258
2.48	0.360625	-0.07093	0.223889
2.48333	0.361342	-0.07486	0.224864
2.48667	0.357363	-0.07321	0.226929
2.49	0.351668	-0.07253	0.226881
2.49333	0.345717	-0.07324	0.229267
2.49667	0.343666	-0.07354	0.230093
2.5	0.341503	-0.07347	0.230258
2.50333	0.343834	-0.0732	0.231412
2.50667	0.345448	-0.07149	0.231919
2.51	0.346842	-0.07086	0.233782
2.51333	0.347402	-0.0704	0.234497
2.51667	0.346264	-0.06958	0.234876
2.52	0.343119	-0.07017	0.235893
2.52333	0.342839	-0.07112	0.237157
2.52667	0.344293	-0.07269	0.235626
2.53	0.337578	-0.07231	0.237523
2.53333	0.341762	-0.07122	0.237387
2.53667	0.344891	-0.07038	0.235721
2.54	0.346263	-0.07042	0.239464
2.54333	0.345134	-0.06842	0.237091
2.54667	0.352651	-0.06837	0.237812
2.55	0.350404	-0.06997	0.238642
2.55333	0.350182	-0.06994	0.239767
2.55667	0.350607	-0.0694	0.239001
2.56	0.352961	-0.07054	0.242727
2.56333	0.35061	-0.07091	0.241755
2.56667	0.346606	-0.07023	0.243423
2.57	0.346836	-0.0699	0.244076
2.57333	0.344074	-0.07084	0.242994
2.57667	0.341664	-0.06965	0.244532
2.58	0.342803	-0.06823	0.245668
2.58333	0.344602	-0.06753	0.245974
2.58667	0.346024	-0.06809	0.246272
2.59	0.349515	-0.06673	0.246271
2.59333	0.351434	-0.06695	0.245574
2.59667	0.350272	-0.0675	0.247026
2.6	0.348922	-0.06872	0.247043
2.60333	0.347744	-0.06499	0.249265
2.60667	0.346427	-0.06623	0.250476
2.61	0.351894	-0.06341	0.250308
2.61333	0.354574	-0.06437	0.251096
2.61667	0.359859	-0.0629	0.25189
2.62	0.35778	-0.06511	0.253275
2.62333	0.36347	-0.06409	0.254855
2.62667	0.353431	-0.06573	0.257608
2.63	0.358179	-0.06369	0.257317
2.63333	0.361729	-0.06392	0.257584
2.63667	0.356096	-0.06413	0.256282
2.64	0.354429	-0.06455	0.256912
2.64333	0.359637	-0.06653	0.256638
2.64667	0.348922	-0.06823	0.255875
2.65	0.344152	-0.0693	0.257505
2.65333	0.35212	-0.06906	0.258984
2.65667	0.350774	-0.06902	0.260315
2.66	0.355663	-0.06686	0.261098
2.66333	0.36001	-0.0654	0.262997
2.66667	0.361988	-0.06462	0.263197
2.67	0.357945	-0.06401	0.264141
2.67333	0.357853	-0.06314	0.263665
2.67667	0.349629	-0.06491	0.264249
2.68	0.348749	-0.06449	0.263833
2.68333	0.34698	-0.0631	0.264566
2.68667	0.351794	-0.06477	0.265624
2.69	0.347369	-0.0631	0.265944
2.69333	0.350747	-0.0639	0.267575
2.69667	0.354776	-0.06449	0.269181
2.7	0.355989	-0.06475	0.268652
2.70333	0.35651	-0.0616	0.26967
2.70667	0.356193	-0.0624	0.271342
2.71	0.354966	-0.06091	0.271492
2.71333	0.351536	-0.05913	0.273449
2.71667	0.349163	-0.05817	0.275981
2.72	0.348115	-0.05898	0.277253
2.72333	0.350699	-0.05924	0.278432
2.72667	0.353119	-0.05705	0.278225
2.73	0.35672	-0.05903	0.279587
2.73333	0.358243	-0.06108	0.278808
2.73667	0.358284	-0.06304	0.278547
2.74	0.361051	-0.06337	0.278968
2.74333	0.360892	-0.06651	0.279491
2.74667	0.355145	-0.06499	0.279432
2.75	0.352791	-0.06356	0.280107
2.75333	0.35719	-0.06247	0.28159
2.75667	0.35546	-0.06324	0.282369
2.76	0.353861	-0.0617	0.283195
2.76333	0.358855	-0.0637	0.282608
2.76667	0.362079	-0.06439	0.285206
2.77	0.355892	-0.0641	0.283986
2.77333	0.353722	-0.06274	0.28532
2.77667	0.358755	-0.06151	0.285826
2.78	0.356133	-0.05867	0.286331
2.78333	0.356025	-0.05788	0.285943
2.78667	0.362716	-0.05687	0.287007
2.79	0.366108	-0.05654	0.28768
2.79333	0.363563	-0.05669	0.287427
2.79667	0.369123	-0.0577	0.28859
2.8	0.371122	-0.05741	0.289597
2.80333	0.369672	-0.05785	0.292176
2.80667	0.372903	-0.05741	0.290624
2.81	0.374468	-0.05948	0.294128
2.81333	0.370065	-0.06038	0.296787
2.81667	0.370032	-0.06027	0.296923
2.82	0.369473	-0.06218	0.296154
2.82333	0.3641	-0.06405	0.297869
2.82667	0.365085	-0.06207	0.297899
2.83	0.369841	-0.06175	0.296136
2.83333	0.372736	-0.06266	0.297628
2.83667	0.373882	-0.05976	0.298527
2.84	0.374462	-0.05707	0.300042
2.84333	0.374419	-0.05608	0.299047
2.84667	0.37504	-0.0571	0.300252
2.85	0.372043	-0.05574	0.299531
2.85333	0.371121	-0.05753	0.300524
2.85667	0.370337	-0.05783	0.301273
2.86	0.37305	-0.05745	0.302865
2.86333	0.368615	-0.057	0.302533
2.86667	0.369771	-0.05537	0.303925
2.87	0.368133	-0.05386	0.304361
2.87333	0.371884	-0.05556	0.304339
2.87667	0.367397	-0.05614	0.305974
2.88	0.366789	-0.05454	0.306827
2.88333	0.368336	-0.05686	0.3088
2.88667	0.374773	-0.05763	0.308501
2.89	0.373473	-0.05634	0.312244
2.89333	0.377275	-0.05484	0.314445
2.89667	0.381696	-0.05545	0.315048
2.9	0.379076	-0.05455	0.314746
2.90333	0.373847	-0.0538	0.316838
2.90667	0.372231	-0.05428	0.315348
2.91	0.371164	-0.05521	0.313673
2.91333	0.37034	-0.05398	0.316792
2.91667	0.369534	-0.05505	0.317681
2.92	0.367574	-0.05669	0.319336
2.92333	0.372457	-0.05641	0.321363
2.92667	0.371188	-0.05844	0.322302
2.93	0.370112	-0.05976	0.32115
2.93333	0.372519	-0.05915	0.322749
2.93667	0.373977	-0.05834	0.322048
2.94	0.369768	-0.05567	0.320726
2.94333	0.372863	-0.05383	0.321209
2.94667	0.37443	-0.0543	0.322982
2.95	0.376789	-0.05473	0.323932
2.95333	0.38241	-0.05479	0.326348
2.95667	0.387579	-0.05624	0.328747
2.96	0.387397	-0.05586	0.330983
2.96333	0.392503	-0.0555	0.333024
2.96667	0.392729	-0.05412	0.332214
2.97	0.38933	-0.05372	0.331687
2.97333	0.38386	-0.05295	0.332413
2.97667	0.381053	-0.0539	0.332475
2.98	0.374154	-0.05345	0.330914
2.98333	0.370734	-0.05358	0.330673
2.98667	0.371539	-0.05141	0.330655
2.99	0.377951	-0.05298	0.331088
2.99333	0.383559	-0.05278	0.332148
2.99667	0.387021	-0.05113	0.336157
3	0.39137	-0.05193	0.337439
3.00333	0.391043	-0.05409	0.339071
3.00667	0.387455	-0.05353	0.341587
3.01	0.379274	-0.05162	0.342312
3.01333	0.380997	-0.04937	0.339688
3.01667	0.373408	-0.04762	0.342208
3.02	0.369324	-0.04639	0.342254
3.02333	0.370589	-0.04479	0.341354
3.02667	0.375383	-0.04715	0.342007
3.03	0.370513	-0.04826	0.342257
3.03333	0.377763	-0.04953	0.343259
3.03667	0.382846	-0.04901	0.344736
3.04	0.38177	-0.05111	0.343864
3.04333	0.384036	-0.05081	0.345547
3.04667	0.385646	-0.05267	0.349567
3.05	0.383243	-0.05189	0.348898
3.05333	0.384591	-0.05179	0.348687
3.05667	0.384993	-0.05072	0.350752
3.06	0.382481	-0.05026	0.350444
3.06333	0.384447	-0.04752	0.349185
3.06667	0.387403	-0.04702	0.350001
3.07	0.38573	-0.0481	0.350288
3.07333	0.389155	-0.04786	0.351693
3.07667	0.388966	-0.04793	0.353144
3.08	0.386996	-0.04942	0.35374
3.08333	0.382362	-0.04857	0.35391
3.08667	0.385341	-0.04824	0.354715
3.09	0.380085	-0.04795	0.353603
3.09333	0.381577	-0.04798	0.354654
3.09667	0.376241	-0.04975	0.35546
3.1	0.377727	-0.05264	0.357697
3.10333	0.37675	-0.05179	0.360513
3.10667	0.382196	-0.05377	0.362306
3.11	0.383893	-0.05391	0.361432
3.11333	0.38936	-0.05168	0.361876
3.11667	0.388587	-0.0506	0.362218
3.12	0.390877	-0.0516	0.360135
3.12333	0.390756	-0.04836	0.361775
3.12667	0.387324	-0.04607	0.363182
3.13	0.388825	-0.04253	0.364581
3.13333	0.393802	-0.04044	0.362532
3.13667	0.391071	-0.03875	0.36697
3.14	0.39344	-0.0397	0.36829
3.14333	0.398557	-0.03956	0.367399
3.14667	0.397935	-0.04426	0.369717
3.15	0.398642	-0.04362	0.371873
3.15333	0.399729	-0.04369	0.370024
3.15667	0.395122	-0.04338	0.369951
3.16	0.395904	-0.04432	0.371319
3.16333	0.400476	-0.04292	0.371495
3.16667	0.398558	-0.0452	0.37312
3.17	0.398769	-0.04644	0.374308
3.17333	0.40511	-0.04726	0.375267
3.17667	0.401705	-0.0467	0.376912
3.18	0.402318	-0.04654	0.377329
3.18333	0.400926	-0.04578	0.377807
3.18667	0.401462	-0.04489	0.379159
3.19	0.394918	-0.04468	0.378386
3.19333	0.396105	-0.0452	0.379195
3.19667	0.393092	-0.04628	0.380199
3.2	0.392933	-0.04844	0.380907
3.20333	0.390751	-0.0477	0.379754
3.20667	0.393065	-0.04537	0.381828
3.21	0.395596	-0.04483	0.38162
3.21333	0.398851	-0.0437	0.38198
3.21667	0.402479	-0.04099	0.384831
3.22	0.404751	-0.04065	0.388173
3.22333	0.408498	-0.04379	0.388212
3.22667	0.406869	-0.04473	0.390172
3.23	0.405559	-0.04348	0.390635
3.23333	0.408078	-0.04327	0.389285
3.23667	0.407177	-0.04185	0.388186
3.24	0.405295	-0.04111	0.390664
3.24333	0.408776	-0.04177	0.391954
3.24667	0.412669	-0.04265	0.39062
3.25	0.40935	-0.04189	0.392186
3.25333	0.411845	-0.04155	0.392361
3.25667	0.413845	-0.04023	0.393633
3.26	0.412334	-0.0384	0.395127
3.26333	0.408962	-0.03844	0.39875
3.26667	0.409593	-0.04034	0.400877
3.27	0.409727	-0.04241	0.403834
3.27333	0.409548	-0.04363	0.401911
3.27667	0.409131	-0.04368	0.403918
3.28	0.409958	-0.04183	0.401951
3.28333	0.410519	-0.03937	0.400561
3.28667	0.411454	-0.03855	0.400556
3.29	0.405757	-0.03623	0.40275
3.29333	0.403674	-0.03684	0.401525
3.29667	0.406557	-0.03879	0.403083
3.3	0.40376	-0.04062	0.404984
3.30333	0.404697	-0.04076	0.40613
3.30667	0.410289	-0.04104	0.407911
3.31	0.410467	-0.03997	0.406924
3.31333	0.405283	-0.03981	0.408814
3.31667	0.408595	-0.03716	0.409467
3.32	0.409597	-0.03717	0.409781
3.32333	0.411204	-0.03798	0.409858
3.32667	0.413443	-0.03941	0.412635
3.33	0.41068	-0.04043	0.413719
3.33333	0.409039	-0.03993	0.415816
3.33667	0.405239	-0.04004	0.414541
3.34	0.404437	-0.03856	0.417008
3.34333	0.404937	-0.0367	0.417552
3.34667	0.409941	-0.03577	0.416412
3.35	0.410355	-0.03892	0.417903
3.35333	0.411705	-0.03919	0.420577
3.35667	0.407547	-0.04024	0.421104
3.36	0.407985	-0.04185	0.420189
3.36333	0.409153	-0.04047	0.421716
3.36667	0.404948	-0.03896	0.41959
3.37	0.401881	-0.03901	0.422134
3.37333	0.406938	-0.03972	0.420251
3.37667	0.410397	-0.03992	0.42364
3.38	0.412349	-0.04189	0.426166
3.38333	0.421743	-0.04244	0.428718
3.38667	0.429114	-0.04232	0.428122
3.39	0.425329	-0.04155	0.430999
3.39333	0.419303	-0.04004	0.429812
3.39667	0.415622	-0.03686	0.43127
3.4	0.415462	-0.03777	0.430507
3.40333	0.408747	-0.03539	0.429834
3.40667	0.410643	-0.03306	0.432801
3.41	0.410633	-0.03199	0.434105
3.41333	0.412132	-0.03487	0.43511
3.41667	0.410541	-0.03368	0.435862
3.42	0.416391	-0.03582	0.438191
3.42333	0.413593	-0.03752	0.437157
3.42667	0.414599	-0.03792	0.439775
3.43	0.417432	-0.03516	0.438344
3.43333	0.412554	-0.03487	0.43943
3.43667	0.406173	-0.03581	0.439939
3.44	0.409013	-0.03632	0.441756
3.44333	0.410595	-0.03574	0.440109
3.44667	0.405873	-0.03735	0.44278
3.45	0.406655	-0.03636	0.445092
3.45333	0.40833	-0.03364	0.447972
3.45667	0.406078	-0.03139	0.448303
3.46	0.405604	-0.03157	0.447693
3.46333	0.40387	-0.03103	0.448401
3.46667	0.410972	-0.0292	0.449012
3.47	0.416095	-0.02981	0.446774
3.47333	0.421601	-0.03138	0.448088
3.47667	0.418812	-0.03251	0.451206
3.48	0.41772	-0.0327	0.451015
3.48333	0.412596	-0.03344	0.451032
3.48667	0.406729	-0.03318	0.45422
3.49	0.401052	-0.03367	0.454051
3.49333	0.404578	-0.0332	0.456083
3.49667	0.405359	-0.03232	0.456544
3.5	0.406367	-0.03603	0.458032
3.50333	0.412492	-0.03669	0.458048
3.50667	0.420406	-0.03777	0.461145
3.51	0.42039	-0.03656	0.462806
3.51333	0.421592	-0.03763	0.46504
3.51667	0.425439	-0.03668	0.46713
3.52	0.424685	-0.0357	0.469721
3.52333	0.419913	-0.03467	0.469329
3.52667	0.421103	-0.03684	0.467285
3.53	0.421502	-0.035	0.467318
3.53333	0.422187	-0.03552	0.466223
3.53667	0.421312	-0.03567	0.465857
3.54	0.42128	-0.03401	0.466771
3.54333	0.422013	-0.03307	0.468989
3.54667	0.429268	-0.03258	0.469371
3.55	0.421865	-0.03142	0.4711
3.55333	0.423877	-0.0311	0.471853
3.55667	0.4221	-0.03221	0.472557
3.56	0.422926	-0.03198	0.472966
3.56333	0.417718	-0.03398	0.475061
3.56667	0.424499	-0.03389	0.474515
3.57	0.424879	-0.03479	0.474326
3.57333	0.430299	-0.03537	0.47582
3.57667	0.427757	-0.03452	0.475721
3.58	0.426943	-0.03341	0.476394
3.58333	0.42561	-0.03324	0.478523
3.58667	0.424427	-0.03314	0.479881
3.59	0.42043	-0.0331	0.479414
3.59333	0.422747	-0.03151	0.481412
3.59667	0.428003	-0.03085	0.481773
3.6	0.429005	-0.02678	0.481732
3.60333	0.426671	-0.0251	0.482678
3.60667	0.426659	-0.02445	0.485509
3.61	0.423904	-0.02718	0.48606
3.61333	0.421182	-0.02992	0.487581
3.61667	0.419851	-0.03278	0.490118
3.62	0.41985	-0.03436	0.491482
3.62333	0.425725	-0.03445	0.489081
3.62667	0.434425	-0.03359	0.487888
3.63	0.429693	-0.03345	0.489057
3.63333	0.429659	-0.03481	0.488952
3.63667	0.439379	-0.03467	0.490859
3.64	0.432289	-0.03354	0.496558
3.64333	0.427395	-0.03464	0.499551
3.64667	0.432746	-0.03381	0.500535
3.65	0.433634	-0.03277	0.500573
3.65333	0.430856	-0.03464	0.501691
3.65667	0.435588	-0.03559	0.497275
3.66	0.434011	-0.03345	0.499108
3.66333	0.438213	-0.03276	0.499927
3.66667	0.440314	-0.03265	0.500971
3.67	0.43527	-0.03142	0.498744
3.67333	0.43678	-0.03083	0.502453
3.67667	0.438256	-0.02995	0.501321
3.68	0.436921	-0.02773	0.501673
3.68333	0.436232	-0.02808	0.503857
3.68667	0.439028	-0.02773	0.506419
3.69	0.435254	-0.02711	0.508251
3.69333	0.435593	-0.03046	0.509519
3.69667	0.434032	-0.02989	0.510659
3.7	0.432579	-0.03013	0.510093
3.70333	0.432164	-0.0289	0.510935
3.70667	0.434054	-0.02741	0.509183
3.71	0.434877	-0.02632	0.512038
3.71333	0.435805	-0.03043	0.51181
3.71667	0.431303	-0.02907	0.514313
3.72	0.432801	-0.02812	0.514065
3.72333	0.433451	-0.03006	0.517909
3.72667	0.436737	-0.02835	0.517705
3.73	0.437451	-0.02656	0.518156
3.73333	0.442801	-0.0286	0.517489
3.73667	0.438686	-0.02984	0.520054
3.74	0.44377	-0.02951	0.521867
3.74333	0.44225	-0.0303	0.521983
3.74667	0.443155	-0.03086	0.522852
3.75	0.441725	-0.02991	0.522955
3.75333	0.447393	-0.03001	0.522468
3.75667	0.444429	-0.0304	0.521132
3.76	0.443251	-0.02818	0.522158
3.76333	0.439793	-0.02752	0.52485
3.76667	0.446238	-0.027	0.527239
3.77	0.44233	-0.02385	0.527239
3.77333	0.442391	-0.0221	0.529692
3.77667	0.437509	-0.02386	0.53066
3.78	0.442383	-0.02327	0.529701
3.78333	0.440652	-0.02108	0.52958
3.78667	0.441289	-0.02257	0.530287
3.79	0.437614	-0.02124	0.531468
3.79333	0.439834	-0.01905	0.532193
3.79667	0.436719	-0.01941	0.534256
3.8	0.434482	-0.02082	0.536783
3.80333	0.432683	-0.02146	0.538042
3.80667	0.435819	-0.02414	0.539347
3.81	0.439104	-0.0265	0.541191
3.81333	0.443261	-0.02635	0.540949
3.81667	0.44677	-0.02499	0.542172
3.82	0.447603	-0.02514	0.54444
3.82333	0.45004	-0.02443	0.544351
3.82667	0.449997	-0.02299	0.545834
3.83	0.449604	-0.02169	0.547549
3.83333	0.444481	-0.02323	0.546058
3.83667	0.449983	-0.02382	0.548176
3.84	0.451453	-0.02266	0.549768
3.84333	0.452969	-0.02186	0.549814
3.84667	0.451978	-0.02329	0.549017
3.85	0.457831	-0.02402	0.551741
3.85333	0.456372	-0.02261	0.551167
3.85667	0.453419	-0.02258	0.549697
3.86	0.448543	-0.02213	0.550903
3.86333	0.443143	-0.02114	0.553888
3.86667	0.444179	-0.01677	0.553956
3.87	0.441426	-0.01675	0.556084
3.87333	0.439643	-0.01662	0.559211
3.87667	0.439962	-0.01697	0.556239
3.88	0.445793	-0.017	0.555934
3.88333	0.443788	-0.01924	0.558271
3.88667	0.444528	-0.01746	0.558542
3.89	0.447246	-0.01783	0.558331
3.89333	0.453073	-0.01899	0.561394
3.89667	0.454028	-0.01833	0.562724
3.9	0.453839	-0.01878	0.56294
3.90333	0.451858	-0.02176	0.56443
3.90667	0.453638	-0.02246	0.567724
3.91	0.453543	-0.02201	0.569692
3.91333	0.453232	-0.02228	0.572576
3.91667	0.45327	-0.01967	0.570903
3.92	0.45673	-0.01842	0.571172
3.92333	0.459978	-0.01764	0.570063
3.92667	0.460083	-0.01769	0.57109
3.93	0.462153	-0.01788	0.570916
3.93333	0.460273	-0.02058	0.573449
3.93667	0.460612	-0.02179	0.57403
3.94	0.459021	-0.02204	0.57633
3.94333	0.457157	-0.02302	0.576536
3.94667	0.456857	-0.02158	0.577854
3.95	0.459355	-0.01793	0.578774
3.95333	0.463088	-0.01525	0.578225
3.95667	0.462963	-0.01392	0.579338
3.96	0.466168	-0.01243	0.581724
3.96333	0.46358	-0.01291	0.582023
3.96667	0.466386	-0.01716	0.583485
3.97	0.463675	-0.01911	0.587371
3.97333	0.45969	-0.02063	0.586561
3.97667	0.459751	-0.0205	0.585925
3.98	0.463405	-0.02259	0.586774
3.98333	0.462377	-0.01965	0.587772
3.98667	0.466044	-0.01857	0.587231
3.99	0.469764	-0.01855	0.589572
3.99333	0.469284	-0.01792	0.592774
3.99667	0.465807	-0.01557	0.595979
4	0.467365	-0.01812	0.596484
4.00333	0.467481	-0.0175	0.599163
4.00667	0.470903	-0.0155	0.600746
4.01	0.469399	-0.01571	0.598885
4.01333	0.469191	-0.01679	0.5972
4.01667	0.469341	-0.01641	0.600121
4.02	0.465625	-0.01735	0.598899
4.02333	0.458964	-0.01917	0.598073
4.02667	0.458327	-0.02017	0.599524
4.03	0.462075	-0.01837	0.601908
4.03333	0.464246	-0.01836	0.600932
4.03667	0.467414	-0.01942	0.602393
4.04	0.470609	-0.01889	0.603423
4.04333	0.474394	-0.01837	0.605045
4.04667	0.47563	-0.01929	0.605621
4.05	0.470625	-0.01949	0.607031
4.05333	0.468156	-0.01764	0.609952
4.05667	0.471192	-0.01923	0.611616
4.06	0.470914	-0.02054	0.613752
4.06333	0.468153	-0.01999	0.614139
4.06667	0.466159	-0.01926	0.614274
4.07	0.468426	-0.01924	0.614577
4.07333	0.470464	-0.019	0.616241
4.07667	0.472265	-0.01727	0.61565
4.08	0.475761	-0.0182	0.615443
4.08333	0.479618	-0.01785	0.617739
4.08667	0.47998	-0.019	0.617727
4.09	0.477574	-0.01857	0.617593
4.09333	0.475336	-0.01864	0.620247
4.09667	0.475104	-0.02034	0.622072
4.1	0.476733	-0.02006	0.624704
4.10333	0.476421	-0.01863	0.624465
4.10667	0.475823	-0.01755	0.626583
4.11	0.475889	-0.01901	0.626194
4.11333	0.474641	-0.01702	0.627084
4.11667	0.470742	-0.01563	0.625179
4.12	0.472045	-0.01849	0.626468
4.12333	0.474101	-0.01882	0.628593
4.12667	0.477455	-0.01861	0.63139
4.13	0.476204	-0.0181	0.630272
4.13333	0.479963	-0.0196	0.631707
4.13667	0.482193	-0.0174	0.634301
4.14	0.474767	-0.01569	0.633329
4.14333	0.470419	-0.01536	0.632632
4.14667	0.470768	-0.01552	0.635185
4.15	0.467618	-0.01258	0.637716
4.15333	0.464963	-0.01174	0.636622
4.15667	0.469276	-0.01419	0.639408
4.16	0.469679	-0.01249	0.642522
4.16333	0.471649	-0.01304	0.64378
4.16667	0.473146	-0.01692	0.643491
4.17	0.469407	-0.01659	0.645268
4.17333	0.472414	-0.01519	0.645774
4.17667	0.476587	-0.01693	0.644902
4.18	0.474811	-0.01733	0.646708
4.18333	0.475881	-0.01481	0.649339
4.18667	0.483795	-0.01536	0.650645
4.19	0.480624	-0.01512	0.650385
4.19333	0.479568	-0.01464	0.652184
4.19667	0.4812	-0.01215	0.653206
4.2	0.478403	-0.01283	0.652984
4.20333	0.477515	-0.0129	0.654339
4.20667	0.481484	-0.01274	0.652934
4.21	0.482083	-0.01119	0.654446
4.21333	0.487968	-0.01255	0.655633
4.21667	0.496053	-0.00967	0.655266
4.22	0.493236	-0.00946	0.655462
4.22333	0.495759	-0.00896	0.661519
4.22667	0.498104	-0.01025	0.663661
4.23	0.492805	-0.00977	0.662723
4.23333	0.48819	-0.012	0.663422
4.23667	0.490798	-0.01096	0.665713
4.24	0.490403	-0.01329	0.664347
4.24333	0.486691	-0.01228	0.666091
4.24667	0.488072	-0.01264	0.66957
4.25	0.486567	-0.01182	0.669264
4.25333	0.486417	-0.01574	0.669139
4.25667	0.482638	-0.01389	0.670931
4.26	0.479605	-0.01379	0.669938
4.26333	0.478754	-0.01316	0.669272
4.26667	0.481023	-0.01682	0.67431
4.27	0.481427	-0.0145	0.67457
4.27333	0.481972	-0.01378	0.674466
4.27667	0.484416	-0.01427	0.675385
4.28	0.488098	-0.016	0.67711
4.28333	0.492016	-0.01341	0.67695
4.28667	0.490912	-0.01205	0.68113
4.29	0.490939	-0.01207	0.681159
4.29333	0.492234	-0.01138	0.683232
4.29667	0.491991	-0.01036	0.683033
4.3	0.491734	-0.01053	0.681385
4.30333	0.491063	-0.01002	0.679734
4.30667	0.493	-0.01107	0.682467
4.31	0.49361	-0.01164	0.681923
4.31333	0.495352	-0.00975	0.684391
4.31667	0.493981	-0.00955	0.687747
4.32	0.49578	-0.01157	0.689429
4.32333	0.499124	-0.00967	0.689256
4.32667	0.500532	-0.00781	0.690658
4.33	0.496762	-0.00869	0.691138
4.33333	0.50098	-0.00893	0.691119
4.33667	0.502405	-0.00826	0.692235
4.34	0.500562	-0.00839	0.69428
4.34333	0.500035	-0.00931	0.69618
4.34667	0.498097	-0.01092	0.695567
4.35	0.495167	-0.01014	0.69796
4.35333	0.494187	-0.00998	0.698956
4.35667	0.492586	-0.01106	0.700754
4.36	0.490419	-0.01186	0.700419
4.36333	0.492795	-0.01103	0.703708
4.36667	0.494313	-0.01296	0.705124
4.37	0.493338	-0.01181	0.705111
4.37333	0.498793	-0.01013	0.706053
4.37667	0.503296	-0.01113	0.707125
4.38	0.503332	-0.01114	0.707459
4.38333	0.498926	-0.0075	0.708203
4.38667	0.500707	-0.00766	0.707956
4.39	0.494129	-0.01047	0.710151
4.39333	0.49127	-0.01001	0.713598
4.39667	0.493789	-0.00911	0.716614
4.4	0.499279	-0.01171	0.71643
4.40333	0.496017	-0.01156	0.719987
4.40667	0.49855	-0.01055	0.718662
4.41	0.499849	-0.00843	0.71828
4.41333	0.496806	-0.00727	0.717787
4.41667	0.493592	-0.00745	0.719554
4.42	0.496445	-0.00873	0.720567
4.42333	0.495269	-0.0073	0.721336
4.42667	0.494146	-0.00841	0.721354
4.43	0.494669	-0.00916	0.721673
4.43333	0.495069	-0.00797	0.723651
4.43667	0.493666	-0.00599	0.722956
4.44	0.497941	-0.00567	0.72276
4.44333	0.501213	-0.0058	0.725505
4.44667	0.500609	-0.00463	0.727306
4.45	0.498355	-0.0032	0.728395
4.45333	0.503012	-0.00235	0.731607
4.45667	0.496516	-0.00235	0.733041
4.46	0.498286	-0.00098	0.732779
4.46333	0.501205	-0.0023	0.733708
4.46667	0.506658	-0.00355	0.734444
4.47	0.504605	-0.00441	0.733299
4.47333	0.512	-0.00476	0.735432
4.47667	0.51178	-0.00534	0.737949
4.48	0.512041	-0.00587	0.737407
4.48333	0.512915	-0.00583	0.73847
4.48667	0.518915	-0.00644	0.741394
4.49	0.514657	-0.00749	0.740801
4.49333	0.513557	-0.00765	0.739443
4.49667	0.517635	-0.00595	0.74164
4.5	0.519079	-0.00585	0.742113
4.50333	0.511236	-0.00588	0.741867
4.50667	0.515413	-0.00411	0.741941
4.51	0.518264	-0.00525	0.745554
4.51333	0.517866	-0.00528	0.746602
4.51667	0.515492	-0.00588	0.747749
4.52	0.520323	-0.00557	0.748799
4.52333	0.521531	-0.00702	0.752872
4.52667	0.520842	-0.00481	0.752667
4.53	0.51864	-0.00551	0.754035
4.53333	0.519312	-0.00284	0.754429
4.53667	0.522479	-0.00226	0.755054
4.54	0.51717	-0.00202	0.754529
4.54333	0.51522	-0.00288	0.757215
4.54667	0.51257	-0.00197	0.75919
4.55	0.510814	-0.00441	0.759904
4.55333	0.50332	-0.00607	0.762205
4.55667	0.505978	-0.00672	0.764206
4.56	0.510725	-0.008	0.764047
4.56333	0.514866	-0.00948	0.766916
4.56667	0.517426	-0.0098	0.769649
4.57	0.52118	-0.00919	0.772281
4.57333	0.524103	-0.00947	0.773139
4.57667	0.522506	-0.00867	0.77532
4.58	0.523002	-0.00682	0.773614
4.58333	0.524216	-0.00576	0.772577
4.58667	0.526773	-0.00483	0.77177
4.59	0.524172	-0.00376	0.772267
4.59333	0.517995	-0.00258	0.773081
4.59667	0.516058	-0.00163	0.775115
4.6	0.515347	-0.00105	0.779255
4.60333	0.50935	-0.00127	0.781891
4.60667	0.511809	0.000845	0.784574
4.61	0.516328	0.00068	0.784072
4.61333	0.517534	0.000128	0.785841
4.61667	0.515114	-0.00024	0.785745
4.62	0.520335	3.23e-05	0.785881
4.62333	0.515476	-0.00202	0.785879
4.62667	0.513044	-0.00147	0.78812
4.63	0.512353	-0.00262	0.786259
4.63333	0.513977	-0.00217	0.786473
4.63667	0.511247	-0.00228	0.786008
4.64	0.520108	-0.00148	0.787152
4.64333	0.523812	-0.00061	0.788413
4.64667	0.524834	0.000723	0.791681
4.65	0.527003	0.001331	0.79173
4.65333	0.534985	0.000961	0.793243
4.65667	0.530679	0.000481	0.793892
4.66	0.533145	-5.4e-05	0.793845
4.66333	0.536636	-0.0017	0.792349
4.66667	0.535331	-0.00208	0.795281
4.67	0.526923	-0.0018	0.796643
4.67333	0.528169	-0.00141	0.798794
4.67667	0.527061	-0.00144	0.800704
4.68	0.529159	-0.00136	0.802609
4.68333	0.530039	-0.00187	0.802564
4.68667	0.535403	-0.00054	0.804051
4.69	0.534968	-0.00103	0.802576
4.69333	0.537394	-0.00224	0.803274
4.69667	0.534636	-0.00141	0.805193
4.7	0.537694	-0.00219	0.807046
4.70333	0.538265	-0.00279	0.807269
4.70667	0.53475	-0.00152	0.809833
4.71	0.526892	-0.00055	0.810226
4.71333	0.529157	-0.00098	0.812075
4.71667	0.529312	0.00034	0.811353
4.72	0.530603	-0.00068	0.812422
4.72333	0.538401	-0.00197	0.815077
4.72667	0.545933	-0.00083	0.818148
4.73	0.545621	-0.00014	0.817987
4.73333	0.545341	0.000296	0.820103
4.73667	0.543891	0.000538	0.820585
4.74	0.538855	0.002014	0.818134
4.74333	0.533528	0.002711	0.819514
4.74667	0.532727	0.004443	0.819991
4.75	0.530198	0.00631	0.820788
4.75333	0.528869	0.007299	0.822392
4.75667	0.533659	0.006557	0.824771
4.76	0.541211	0.006238	0.824715
4.76333	0.541692	0.004461	0.826984
4.76667	0.545013	0.001965	0.828798
4.77	0.549244	0.003736	0.832482
4.77333	0.545834	0.003542	0.835946
4.77667	0.541355	0.00245	0.838347
4.78	0.538701	0.003074	0.841086
4.78333	0.53624	0.004905	0.840737
4.78667	0.53641	0.003338	0.839394
4.79	0.535163	0.00411	0.837262
4.79333	0.534395	0.006247	0.838324
4.79667	0.535388	0.007819	0.838349
4.8	0.537141	0.009069	0.840164
4.80333	0.534298	0.008774	0.841714
4.80667	0.537068	0.007212	0.845118
4.81	0.543569	0.005493	0.845171
4.81333	0.548433	0.004323	0.84516
4.81667	0.549328	0.000701	0.847195
4.82	0.550464	0.001153	0.846968
4.82333	0.547437	0.004258	0.849382
4.82667	0.542162	0.005009	0.848719
4.83	0.541073	0.005816	0.850566
4.83333	0.542196	0.006791	0.852998
4.83667	0.544399	0.006742	0.855933
4.84	0.55032	0.007416	0.855735
4.84333	0.552405	0.007564	0.859654
4.84667	0.554155	0.006959	0.859188
4.85	0.552426	0.006357	0.858962
4.85333	0.54822	0.008094	0.862047
4.85667	0.547173	0.006765	0.860365
4.86	0.547967	0.005917	0.861796
4.86333	0.542207	0.004365	0.865469
4.86667	0.542843	0.005656	0.866348
4.87	0.548135	0.004033	0.864265
4.87333	0.547947	0.003418	0.867091
4.87667	0.546354	0.00365	0.866346
4.88	0.552136	0.005042	0.864815
4.88333	0.548822	0.005228	0.865296
4.88667	0.5501	0.005269	0.867715
4.89	0.546157	0.006993	0.868141
4.89333	0.54905	0.007923	0.870815
4.89667	0.548605	0.006969	0.873053
4.9	0.555092	0.005638	0.873793
4.90333	0.552601	0.005622	0.874791
4.90667	0.557263	0.004547	0.877111
4.91	0.559316	0.00399	0.878852
4.91333	0.553807	0.004601	0.878939
4.91667	0.551638	0.006123	0.880259
4.92	0.552605	0.0083	0.881962
4.92333	0.553356	0.009051	0.880791
4.92667	0.547574	0.009728	0.880839
4.93	0.553084	0.009774	0.883509
4.93333	0.554796	0.007726	0.884757
4.93667	0.55436	0.006018	0.885367
4.94	0.552999	0.006349	0.88898
4.94333	0.554019	0.004514	0.889632
4.94667	0.552935	0.004679	0.889894
4.95	0.549128	0.005727	0.891704
4.95333	0.552031	0.008632	0.889472
4.95667	0.552438	0.007206	0.889722
4.96	0.554695	0.008835	0.892386
4.96333	0.554501	0.009549	0.893266
4.96667	0.554482	0.010656	0.895007
4.97	0.549719	0.008284	0.897789
4.97333	0.550812	0.00849	0.900918
4.97667	0.554317	0.00816	0.9022
4.98	0.557066	0.007462	0.903736
4.98333	0.559996	0.006755	0.903611
4.98667	0.5598	0.007414	0.905701
4.99	0.5615	0.00755	0.903587
4.99333	0.560479	0.007387	0.904797
4.99667	0.55468	0.006944	0.90697
5	0.553118	0.006214	0.907774
5.00333	0.55471	0.00628	0.908577
5.00667	0.554092	0.005059	0.909091
5.01	0.55278	0.005312	0.910513
5.01333	0.555762	0.005831	0.910727
5.01667	0.55821	0.009356	0.911959
5.02	0.56016	0.007374	0.91294
5.02333	0.558605	0.010239	0.915905
5.02667	0.561801	0.010558	0.915045
5.03	0.562368	0.011086	0.914723
5.03333	0.562923	0.009475	0.914667
5.03667	0.564037	0.01322	0.916488
5.04	0.562618	0.012079	0.917766
5.04333	0.561203	0.01166	0.920844
5.04667	0.561803	0.012555	0.923754
5.05	0.560328	0.011175	0.927838
5.05333	0.558703	0.00931	0.928444
5.05667	0.566301	0.008784	0.929335
5.06	0.568907	0.00836	0.930352
5.06333	0.569654	0.00737	0.931055
5.06667	0.575948	0.008539	0.928681
5.07	0.577519	0.010281	0.929764
5.07333	0.574959	0.011011	0.931113
5.07667	0.569525	0.01015	0.931723
5.08	0.569852	0.011706	0.931602
5.08333	0.562711	0.011873	0.935897
5.08667	0.563226	0.010963	0.938051
5.09	0.564134	0.01261	0.938999
5.09333	0.5705	0.012804	0.941311
5.09667	0.569439	0.011225	0.943646
5.1	0.571046	0.012423	0.943861
5.10333	0.571379	0.009702	0.944185
5.10667	0.56911	0.010377	0.945279
5.11	0.569633	0.013215	0.942934
5.11333	0.573757	0.013127	0.943145
5.11667	0.571914	0.012018	0.94334
5.12	0.575047	0.014869	0.946706
5.12333	0.579189	0.0124	0.948252
5.12667	0.577381	0.009834	0.952082
5.13	0.574283	0.008809	0.954565
5.13333	0.577235	0.009454	0.957303
5.13667	0.574347	0.009218	0.955937
5.14	0.570511	0.008603	0.955785
5.14333	0.568506	0.009568	0.95577
5.14667	0.56944	0.012071	0.956926
5.15	0.571628	0.011708	0.957456
5.15333	0.571013	0.009811	0.95714
5.15667	0.573408	0.011247	0.960644
5.16	0.574749	0.009956	0.96305
5.16333	0.578842	0.008308	0.962787
5.16667	0.582501	0.008623	0.963279
5.17	0.585748	0.011683	0.965873
5.17333	0.588527	0.011474	0.964307
5.17667	0.590808	0.013414	0.964974
5.18	0.590788	0.015498	0.967288
5.18333	0.588411	0.01649	0.968628
5.18667	0.587166	0.017421	0.970052
5.19	0.58625	0.019001	0.972142
5.19333	0.589236	0.019408	0.971392
5.19667	0.59044	0.018024	0.973306
5.2	0.590884	0.018881	0.974405
5.20333	0.593639	0.017401	0.974894
5.20667	0.593165	0.016031	0.97632
5.21	0.593155	0.014626	0.980422
5.21333	0.59388	0.015189	0.979256
5.21667	0.592333	0.013272	0.97952
5.22	0.594361	0.010845	0.979114
5.22333	0.593566	0.01205	0.980496
5.22667	0.588864	0.012931	0.981541
5.23	0.583705	0.015083	0.982015
5.23333	0.581847	0.01615	0.982843
5.23667	0.577668	0.016807	0.984935
5.24	0.576319	0.016431	0.986256
5.24333	0.578028	0.017989	0.988891
5.24667	0.577651	0.017405	0.992023
5.25	0.580565	0.016542	0.995529
5.25333	0.584762	0.017185	0.998724
5.25667	0.589695	0.018022	0.996856
5.26	0.588616	0.017766	0.995338
5.26333	0.590854	0.016039	0.997237
5.26667	0.589461	0.017433	0.997719
5.27	0.585018	0.020641	0.995819
5.27333	0.582041	0.020476	0.998648
5.27667	0.583186	0.021394	1.0015
5.28	0.581366	0.021956	1.00041
5.28333	0.584339	0.02046	1.00034
5.28667	0.587357	0.017905	1.00116
5.29	0.589178	0.01688	1.00171
5.29333	0.591281	0.01599	1.00124
5.29667	0.595641	0.016596	1.00501
5.3	0.599049	0.016018	1.00419
5.30333	0.600431	0.01434	1.00718
5.30667	0.598425	0.014334	1.01109
5.31	0.599038	0.013639	1.01271
5.31333	0.594558	0.013098	1.01148
5.31667	0.59408	0.013948	1.01401
5.32	0.595631	0.015341	1.01506
5.32333	0.598159	0.014694	1.01485
5.32667	0.598809	0.016101	1.01589
5.33	0.605845	0.017611	1.01614
5.33333	0.606109	0.018285	1.01826
5.33667	0.603401	0.019885	1.02076
5.34	0.607069	0.018781	1.01911
5.34333	0.610236	0.016273	1.02281
5.34667	0.607046	0.016245	1.02636
5.35	0.607695	0.017287	1.02741
5.35333	0.610283	0.018515	1.02605
5.35667	0.610123	0.01976	1.0303
5.36	0.604119	0.021126	1.02873
5.36333	0.607291	0.02034	1.02988
5.36667	0.607917	0.019846	1.03135
5.37	0.607204	0.019265	1.03402
5.37333	0.605705	0.019264	1.03374
5.37667	0.611872	0.020198	1.03552
5.38	0.608089	0.020426	1.0355
5.38333	0.603389	0.019581	1.03514
5.38667	0.603988	0.016627	1.0364
5.39	0.601019	0.017567	1.03931
5.39333	0.597209	0.016775	1.04023
5.39667	0.594921	0.016296	1.04102
5.4	0.598064	0.016882	1.0422
5.40333	0.598031	0.021429	1.04265
5.40667	0.597781	0.022179	1.04349
5.41	0.600251	0.024318	1.04453
5.41333	0.605723	0.025172	1.04749
5.41667	0.603309	0.026961	1.05014
5.42	0.599967	0.025702	1.05255
5.42333	0.603372	0.023901	1.05239
5.42667	0.602542	0.021994	1.05533
5.43	0.598224	0.019837	1.05453
5.43333	0.601801	0.017239	1.05538
5.43667	0.606118	0.015308	1.05468
5.44	0.603298	0.017606	1.0564
5.44333	0.602799	0.017629	1.05565
5.44667	0.604955	0.019998	1.05798
5.45	0.603724	0.021632	1.05718
5.45333	0.603998	0.023397	1.05968
5.45667	0.610396	0.02394	1.06009
5.46	0.6121	0.026264	1.06074
5.46333	0.615242	0.026646	1.06103
5.46667	0.613714	0.028407	1.06413
5.47	0.613353	0.028637	1.06506
5.47333	0.611464	0.026075	1.06724
5.47667	0.608614	0.023786	1.06965
5.48	0.609486	0.023878	1.07197
5.48333	0.616542	0.02168	1.07255
5.48667	0.618043	0.020519	1.07389
5.49	0.615048	0.022043	1.07538
5.49333	0.62231	0.021131	1.07716
5.49667	0.624387	0.019272	1.07885
5.5	0.619938	0.019438	1.08066
5.50333	0.621683	0.01967	1.08013
5.50667	0.630427	0.019001	1.08081
5.51	0.628237	0.021971	1.08106
5.51333	0.629028	0.023642	1.08097
5.51667	0.627825	0.022543	1.0814
5.52	0.629087	0.023706	1.08271
5.52333	0.626578	0.023939	1.08209
5.52667	0.623834	0.02227	1.08499
5.53	0.623608	0.021442	1.08571
5.53333	0.629261	0.021718	1.0852
5.53667	0.623902	0.021316	1.08702
5.54	0.623959	0.022019	1.08977
5.54333	0.622215	0.020623	1.08999
5.54667	0.614651	0.020697	1.09225
5.55	0.609983	0.02119	1.09578
5.55333	0.614224	0.021532	1.09796
5.55667	0.611023	0.022377	1.09754
5.56	0.613436	0.026399	1.09948
5.56333	0.621473	0.028214	1.09978
5.56667	0.624588	0.028514	1.09945
5.57	0.621827	0.02725	1.10073
5.57333	0.62345	0.025742	1.10532
5.57667	0.629108	0.023734	1.10417
5.58	0.627688	0.021848	1.10539
5.58333	0.627884	0.021784	1.10723
5.58667	0.630117	0.023276	1.10879
5.59	0.631429	0.024062	1.10799
5.59333	0.623388	0.025489	1.1115
5.59667	0.624133	0.027716	1.11156
5.6	0.623929	0.027508	1.1141
5.60333	0.625793	0.026597	1.11382
5.60667	0.629529	0.028075	1.11554
5.61	0.633229	0.028186	1.11563
5.61333	0.631789	0.026551	1.11745
5.61667	0.635131	0.027593	1.11768
5.62	0.634804	0.026901	1.11995
5.62333	0.627373	0.025689	1.11951
5.62667	0.631514	0.021865	1.11953
5.63	0.633819	0.021326	1.12424
5.63333	0.631255	0.021906	1.12608
5.63667	0.63077	0.023107	1.12537
5.64	0.635091	0.023076	1.1283
5.64333	0.635997	0.025757	1.13061
5.64667	0.63608	0.027215	1.12781
5.65	0.636327	0.027234	1.12878
5.65333	0.632549	0.027301	1.1299
5.65667	0.633627	0.028456	1.13105
5.66	0.633665	0.030499	1.13217
5.66333	0.632117	0.03011	1.13466
5.66667	0.628636	0.030612	1.13368
5.67	0.634675	0.03132	1.13534
5.67333	0.634507	0.03005	1.13456
5.67667	0.631498	0.028568	1.13694
5.68	0.632344	0.028244	1.14146
5.68333	0.636352	0.025631	1.14416
5.68667	0.636349	0.026752	1.14556
5.69	0.634876	0.02703	1.14864
5.69333	0.634755	0.027376	1.14957
5.69667	0.634241	0.028681	1.14653
5.7	0.633878	0.030381	1.14827
5.70333	0.629311	0.029023	1.1498
5.70667	0.628073	0.028082	1.15169
5.71	0.629601	0.02537	1.15258
5.71333	0.631032	0.023571	1.15641
5.71667	0.633646	0.024086	1.15728
5.72	0.638608	0.025189	1.15739
5.72333	0.643499	0.025931	1.15691
5.72667	0.639917	0.031137	1.1581
5.73	0.641704	0.033319	1.15778
5.73333	0.638694	0.03132	1.15835
5.73667	0.636805	0.030206	1.16181
5.74	0.637717	0.031569	1.16364
5.74333	0.644478	0.027833	1.16528
5.74667	0.644383	0.026625	1.16679
5.75	0.641324	0.028816	1.16964
5.75333	0.641889	0.029241	1.17031
5.75667	0.641392	0.028988	1.17218
5.76	0.641165	0.031108	1.17275
5.76333	0.646096	0.031838	1.17376
5.76667	0.65599	0.031689	1.17271
5.77	0.658696	0.031544	1.17379
5.77333	0.661996	0.032457	1.17448
5.77667	0.660681	0.031408	1.1755
5.78	0.654527	0.030275	1.1759
5.78333	0.653334	0.028951	1.17645
5.78667	0.65416	0.027312	1.17601
5.79	0.653012	0.026698	1.17645
5.79333	0.649574	0.026324	1.17652
5.79667	0.655536	0.027994	1.17797
5.8	0.654006	0.029783	1.18047
5.80333	0.653708	0.032273	1.18286
5.80667	0.654571	0.031836	1.18518
5.81	0.65895	0.030444	1.18592
5.81333	0.658376	0.030419	1.18576
5.81667	0.65959	0.030655	1.18543
5.82	0.656593	0.030767	1.18568
5.82333	0.658556	0.031017	1.18427
5.82667	0.659368	0.034114	1.18442
5.83	0.653106	0.033212	1.18827
5.83333	0.656383	0.033512	1.19074
5.83667	0.663033	0.03183	1.19355
5.84	0.662804	0.034849	1.19757
5.84333	0.663095	0.035193	1.20281
5.84667	0.669415	0.035331	1.20407
5.85	0.66836	0.035886	1.20456
5.85333	0.668835	0.037167	1.20648
5.85667	0.667414	0.033606	1.2064
5.86	0.66471	0.031844	1.20494
5.86333	0.663367	0.031284	1.20384
5.86667	0.663747	0.030755	1.20668
5.87	0.66125	0.029192	1.20564
5.87333	0.661928	0.030851	1.20601
5.87667	0.662473	0.032562	1.2075
5.88	0.662353	0.034193	1.21194
5.88333	0.658432	0.032147	1.21195
5.88667	0.658229	0.034606	1.21372
5.89	0.659306	0.034253	1.21652
5.89333	0.662477	0.034778	1.21895
5.89667	0.665741	0.03375	1.21858
5.9	0.669263	0.035796	1.21972
5.90333	0.667439	0.034587	1.22083
5.90667	0.664851	0.035728	1.22037
5.91	0.66731	0.03552	1.221
5.91333	0.666849	0.037084	1.22321
5.91667	0.667429	0.038079	1.2231
5.92	0.666708	0.038648	1.22311
5.92333	0.667481	0.037941	1.22425
5.92667	0.66269	0.036244	1.22536
5.93	0.659133	0.037021	1.22712
5.93333	0.660812	0.035363	1.23154
5.93667	0.664619	0.034563	1.23279
5.94	0.665123	0.032185	1.23471
5.94333	0.670766	0.033707	1.23491
5.94667	0.673737	0.031305	1.23504
5.95	0.671448	0.030499	1.23407
5.95333	0.674505	0.030499	1.23527
5.95667	0.678071	0.034708	1.23906
5.96	0.67669	0.034533	1.24163
5.96333	0.677638	0.03493	1.24365
5.96667	0.676079	0.036545	1.24594
5.97	0.670272	0.036299	1.24636
5.97333	0.664215	0.033351	1.24367
5.97667	0.663166	0.031616	1.24475
5.98	0.661705	0.033671	1.24559
5.98333	0.662978	0.034551	1.24615
5.98667	0.666034	0.036159	1.24772
5.99	0.674514	0.036853	1.24894
5.99333	0.674271	0.039874	1.24905
5.99667	0.677139	0.039121	1.25111
6	0.679473	0.038864	1.25472
6.00333	0.679746	0.038611	1.25599
6.00667	0.67377	0.038457	1.25787
6.01	0.678469	0.035861	1.26065
6.01333	0.678713	0.03649	1.26108
6.01667	0.675343	0.03733	1.25869
6.02	0.679328	0.037417	1.25958
6.02333	0.683122	0.038649	1.26074
6.02667	0.681896	0.038034	1.26136
6.03	0.685328	0.037899	1.2622
6.03333	0.693545	0.035642	1.26323
6.03667	0.691172	0.036034	1.26525
6.04	0.691109	0.036153	1.26679
6.04333	0.695749	0.037761	1.26756
6.04667	0.695668	0.036203	1.27037
6.05	0.691175	0.035959	1.27271
6.05333	0.695087	0.036546	1.27421
6.05667	0.694619	0.036332	1.27746
6.06	0.689279	0.036879	1.27812
6.06333	0.685362	0.037455	1.27767
6.06667	0.684145	0.037605	1.27866
6.07	0.682278	0.035873	1.2809
6.07333	0.683259	0.035087	1.27807
6.07667	0.68242	0.03495	1.27913
6.08	0.683151	0.034836	1.28007
6.08333	0.687009	0.035598	1.28031
6.08667	0.687101	0.035313	1.27935
6.09	0.690278	0.037696	1.28344
6.09333	0.696287	0.037856	1.28499
6.09667	0.698743	0.039596	1.28536
6.1	0.699784	0.0419	1.28743
6.10333	0.698866	0.042797	1.28857
6.10667	0.696488	0.040933	1.28742
6.11	0.695788	0.040846	1.28917
6.11333	0.693628	0.0387	1.29295
6.11667	0.69428	0.036983	1.29489
6.12	0.697327	0.038007	1.29763
6.12333	0.697184	0.038562	1.29949
6.12667	0.697446	0.038567	1.30023
6.13	0.702982	0.039148	1.29979
6.13333	0.703682	0.038688	1.29784
6.13667	0.702306	0.037919	1.29875
6.14	0.704148	0.037023	1.29988
6.14333	0.702439	0.036982	1.3026
6.14667	0.69803	0.03623	1.30427
6.15	0.696884	0.037245	1.30837
6.15333	0.697188	0.037553	1.31009
6.15667	0.69706	0.037361	1.31213
6.16	0.695282	0.038163	1.31222
6.16333	0.694348	0.040008	1.31319
6.16667	0.692568	0.040327	1.31477
6.17	0.689542	0.039717	1.31687
6.17333	0.687797	0.041039	1.32019
6.17667	0.689033	0.041468	1.3219
6.18	0.68949	0.040464	1.32295
6.18333	0.690859	0.04062	1.32415
6.18667	0.692761	0.041099	1.32397
6.19	0.691652	0.040542	1.32251
6.19333	0.694591	0.040131	1.32266
6.19667	0.694977	0.040609	1.32553
6.2	0.698364	0.042465	1.32639
6.20333	0.696296	0.043253	1.32811
6.20667	0.700132	0.043187	1.32842
6.21	0.697472	0.042268	1.32912
6.21333	0.699871	0.041558	1.32766
6.21667	0.69648	0.038432	1.32868
6.22	0.701445	0.039031	1.33086
6.22333	0.699762	0.039398	1.33184
6.22667	0.698238	0.037869	1.33324
6.23	0.697286	0.039693	1.33549
6.23333	0.700374	0.041726	1.33637
6.23667	0.698941	0.043375	1.33642
6.24	0.699716	0.045659	1.33839
6.24333	0.70643	0.048071	1.3392
6.24667	0.710515	0.047904	1.34083
6.25	0.709796	0.047185	1.34239
6.25333	0.712327	0.0439	1.34375
6.25667	0.714092	0.039315	1.34595
6.26	0.713682	0.040087	1.34812
6.26333	0.71188	0.038363	1.34905
6.26667	0.711832	0.039287	1.34806
6.27	0.715855	0.039488	1.3494
6.27333	0.718321	0.041273	1.34919
6.27667	0.713522	0.040379	1.35116
6.28	0.713034	0.041947	1.35449
6.28333	0.710923	0.039469	1.35745
6.28667	0.705452	0.040477	1.35914
6.29	0.70564	0.042046	1.36301
6.29333	0.710875	0.043895	1.36541
6.29667	0.708469	0.042505	1.3672
6.3	0.714122	0.042783	1.3685
6.30333	0.717663	0.0429	1.36812
6.30667	0.716658	0.042475	1.36811
6.31	0.716403	0.040925	1.36842
6.31333	0.724633	0.04099	1.36748
6.31667	0.725204	0.042726	1.37006
6.32	0.724959	0.042527	1.37185
6.32333	0.723899	0.042217	1.37274
6.32667	0.724507	0.042425	1.37305
6.33	0.72195	0.043691	1.37406
6.33333	0.720124	0.04211	1.37342
6.33667	0.720534	0.042436	1.3739
6.34	0.723088	0.043007	1.37496
6.34333	0.723437	0.041231	1.37597
6.34667	0.723421	0.041081	1.37648
6.35	0.723409	0.042055	1.37959
6.35333	0.728452	0.040711	1.38279
6.35667	0.730099	0.040549	1.38383
6.36	0.730375	0.043095	1.38688
6.36333	0.734282	0.043234	1.39073
6.36667	0.736492	0.042198	1.39263
6.37	0.733096	0.044035	1.39078
6.37333	0.729468	0.044255	1.39303
6.37667	0.728854	0.044569	1.39208
6.38	0.727332	0.043594	1.39332
6.38333	0.720765	0.044451	1.39213
6.38667	0.721888	0.042907	1.39406
6.39	0.724979	0.043393	1.39501
6.39333	0.727575	0.041015	1.39759
6.39667	0.728022	0.041456	1.39656
6.4	0.734092	0.041971	1.39769
6.40333	0.733171	0.044971	1.39813
6.40667	0.731716	0.04294	1.3979
6.41	0.730542	0.043573	1.39869
6.41333	0.731723	0.046207	1.39864
6.41667	0.731465	0.047743	1.39972
6.42	0.729827	0.045982	1.40125
6.42333	0.72919	0.047412	1.40238
6.42667	0.730183	0.049547	1.40077
6.43	0.730124	0.047695	1.40544
6.43333	0.731662	0.047506	1.40763
6.43667	0.732471	0.046697	1.4081
6.44	0.733877	0.045896	1.40789
6.44333	0.731698	0.044601	1.41177
6.44667	0.731186	0.04356	1.41309
6.45	0.729946	0.042494	1.41376
6.45333	0.73106	0.043299	1.41769
6.45667	0.731237	0.045888	1.4202
6.46	0.730815	0.0452	1.42035
6.46333	0.735348	0.047652	1.42306
6.46667	0.735944	0.04858	1.42485
6.47	0.73887	0.048869	1.42685
6.47333	0.744872	0.048465	1.42919
6.47667	0.750474	0.050897	1.43172
6.48	0.745733	0.049097	1.43081
6.48333	0.747716	0.047869	1.43072
6.48667	0.748044	0.046925	1.42897
6.49	0.745364	0.045913	1.43121
6.49333	0.74721	0.044859	1.43109
6.49667	0.748346	0.04631	1.43143
6.5	0.750135	0.045923	1.43319
6.50333	0.749245	0.047135	1.43498
6.50667	0.748864	0.046872	1.43373
6.51	0.747212	0.048354	1.43553
6.51333	0.749527	0.04775	1.43936
6.51667	0.748959	0.048841	1.44022
6.52	0.748165	0.050565	1.44176
6.52333	0.749314	0.051113	1.44442
6.52667	0.745452	0.049152	1.44395
6.53	0.740172	0.051104	1.44463
6.53333	0.742259	0.052766	1.44765
6.53667	0.742263	0.05183	1.44809
6.54	0.741311	0.051828	1.44786
6.54333	0.745104	0.052672	1.45121
6.54667	0.751288	0.050924	1.45074
6.55	0.748357	0.050503	1.45072
6.55333	0.755208	0.050492	1.45382
6.55667	0.75629	0.047954	1.45585
6.56	0.756061	0.049536	1.45468
6.56333	0.756104	0.050677	1.45679
6.56667	0.756685	0.049424	1.45734
6.57	0.754263	0.048665	1.45727
6.57333	0.755848	0.051159	1.4598
6.57667	0.759244	0.052551	1.46186
6.58	0.758788	0.052282	1.46322
6.58333	0.758635	0.052223	1.46463
6.58667	0.752989	0.051901	1.46603
6.59	0.750438	0.051168	1.46654
6.59333	0.747353	0.049679	1.46945
6.59667	0.751859	0.049158	1.4706
6.6	0.750696	0.047163	1.47338
6.60333	0.753607	0.047881	1.47451
6.60667	0.753624	0.049107	1.47506
6.61	0.757063	0.047826	1.47469
6.61333	0.752305	0.047062	1.47545
6.61667	0.755575	0.049455	1.47663
6.62	0.752962	0.050829	1.47713
6.62333	0.75581	0.05005	1.47904
6.62667	0.754539	0.051899	1.48154
6.63	0.756794	0.052003	1.48247
6.63333	0.754231	0.051441	1.48282
6.63667	0.7573	0.048995	1.48449
6.64	0.759798	0.049968	1.48572
6.64333	0.763096	0.048292	1.48597
6.64667	0.766417	0.049811	1.48655
6.65	0.770493	0.049362	1.48697
6.65333	0.773792	0.050243	1.49018
6.65667	0.771122	0.050185	1.49084
6.66	0.769155	0.049241	1.49274
[truncated: 7,152 more rows]
