# Supplementary material for: Early steps of protein disaggregation by Hsp70 chaperone and class B J-domain proteins are shaped by Hsp110
Source: eLife. 2024 Oct 15;13:RP94795. doi: 10.7554/eLife.94795 (PMC11479587; doi:10.7554/eLife.94795)
Supplement: Figure 1—source data 1. [file elife-94795-fig1-data1.xlsx]

## Sheet: Fig 1A
Time [min]	Sis1,Ssa1			Sis1, Ssa1, 0.1M Sse1			Ydj1, Ssa1			Ydj1, Ssa1, 0.1M Sse
	Mean	SD	N	Mean	SD	N	Mean	SD	N	Mean	SD	N
0	0.0002	0	3	0.0002	0	3	0.0002	0	3	0.0004	0.0003	3
5	0.0002	0	3	0.0035	0.0009	3	0.0007	0	3	0.0014	0.0005	3
10	0.0008	0.0001	3	0.0641	0.0239	3	0.0053	0.0005	3	0.0059	0.0003	3
15	0.0052	0.0011	3	0.2477	0.0213	3	0.0134	0.0006	3	0.0117	0.0017	3
20	0.0242	0.0057	3	0.4626	0.0234	3	0.0222	0.0005	3	0.0191	0.0018	3
30	0.1286	0.024	3	1.2097	0.1256	3	0.0476	0.0022	3	0.0377	0.0042	3
45	0.5617	0.0581	3	2.5528	0.1529	3	0.0948	0.0125	3	0.0635	0.0014	3
60	1.255	0.1965	3	3.5948	0.359	3	0.1474	0.0062	3	0.0911	0.0101	3
75	2.2336	0.1088	3	4.7684	0.4637	3	0.1935	0.0153	3	0.1258	0.009	3
90	3.2945	0.221	3	5.8806	0.4279	3	0.2635	0.0292	3	0.1568	0.0305	3
105	4.0776	0.1144	3	6.4384	0.7201	3	0.3105	0.0263	3	0.1857	0.0358	3
120	4.6982	0.3402	3	7.0403	0.5074	3	0.35	0.0328	3	0.2221	0.0235	3
135	5.3262	0.4144	3	7.6229	0.7508	3	0.3923	0.031	3	0.2603	0.02	3
150	6.0546	0.3931	3	8.2388	0.5365	3	0.4364	0.0418	3	0.2941	0.0444	3
165	6.4511	0.2905	3	8.4723	0.5155	3	0.4848	0.0305	3	0.3127	0.0473	3
180	6.7917	0.3856	3	8.7671	0.3984	3	0.5172	0.0193	3	0.3322	0.0634	3
