# Supplementary material for: Early steps of protein disaggregation by Hsp70 chaperone and class B J-domain proteins are shaped by Hsp110
Source: eLife. 2024 Oct 15;13:RP94795. doi: 10.7554/eLife.94795 (PMC11479587; doi:10.7554/eLife.94795)
Supplement: Figure 1—source data 2. [file elife-94795-fig1-data2.xlsx]

## Sheet: Fig 1B
Time [min]	Sis1,Ssa1			Sis1, Ssa1, 0,1uM Sse1			Ydj1, Ssa1			Ydj1, Ssa1, 0,1uM Sse1			Sis1, Ssa1, 0,1uM Sse1 no ATP			Ydj1, Ssa1, 0,1uM Sse1 no ATP
0	-0.00477	0.002064	-0.00282	-0.00437	-0.00474	0.001789	-4e-05	-0.00138	0.002411	-0.00067	-0.00354	-0.00935	-0.00585	-0.01591	4.69e-05	0.002838	-0.00089	-0.00059
0,00333333	-0.00251	-0.00492	-0.00779	-0.00853	-0.00617	-0.00216	0.001634	-0.00703	0.004018	-0.00215	-0.00074	-0.01009	-0.00401	-0.02618	-0.00297	0.004099	-0.00178	-0.00059
0,00666667	-0.00082	-0.00183	-0.00529	-0.00929	-0.00812	-0.00382	0.002198	-0.00595	-0.00159	-0.00076	-0.00569	-0.01111	-0.00447	-0.02939	-0.00522	-0.00061	-0.00504	-0.00402
0,01	-0.00118	-0.00837	-0.00731	-0.01087	-0.00552	-0.00327	0.002278	-0.01344	-0.00742	-0.00162	-0.00328	-0.01021	-0.00627	-0.02355	-0.00732	-0.00522	-0.0038	-0.00825
0,01333333	0.000215	-0.00823	-0.00917	-0.01359	-0.01103	-0.00331	0.002533	-0.00983	-0.0026	-0.00253	-0.00354	-0.0096	-0.0077	-0.02323	-0.00744	-0.00359	-0.00496	-0.01409
0,01666667	-0.00023	-0.00944	-0.00974	-0.01498	-0.00983	-0.00952	0.003148	-0.0099	-0.00517	-0.00269	-0.00508	-0.01208	-0.00835	-0.01959	-0.00824	-0.0067	-0.0047	-0.02069
0,02	0.000513	-0.01016	-0.00836	-0.01707	-0.01039	-0.00497	0.003623	-0.0127	-0.00249	-0.00378	-0.00495	-0.01462	-0.00994	-0.01106	-0.00738	-0.01061	-0.0045	-0.0263
0,02333333	-0.00029	-0.0088	-0.01239	-0.02028	-0.01185	-0.00429	0.004347	-0.01525	-0.00915	-0.00491	-0.0051	-0.01194	-0.01027	-0.00494	-0.0073	-0.00923	-0.00322	-0.02686
0,02666667	-0.00011	-0.0082	-0.01342	-0.02324	-0.00234	-0.00285	0.004517	-0.00914	-0.01223	-0.00562	-0.00307	-0.01525	-0.01133	-0.00926	-0.00667	-0.00837	-0.0061	-0.02448
0,03	-0.00309	-0.01255	-0.01105	-0.02553	-0.00491	-0.00146	0.002243	-0.01119	-0.00672	-0.00587	-0.00223	-0.01427	-0.01096	-0.00751	-0.00703	-0.0139	-0.0055	-0.01754
0,03333333	-0.00224	-0.00982	-0.01094	-0.02736	-0.00562	-0.00133	0.000553	-0.01247	-0.00799	-0.00727	-0.00736	-0.01461	-0.00966	-0.00595	-0.0054	-0.01487	-0.00533	-0.01081
0,03666667	-0.00325	-0.01069	-0.01005	-0.02829	-0.00686	-0.00597	0.000196	-0.01556	-0.00773	-0.00694	-0.00484	-0.01528	-0.00932	-0.00965	-0.00682	-0.0144	-0.00636	-0.00704
0,04	-0.00571	-0.0103	-0.01303	-0.02984	-0.00641	-0.00078	-0.00341	-0.01372	-0.0081	-0.00832	-0.00524	-0.01567	-0.00991	-0.00867	-0.00446	-0.01762	-0.0057	-0.01032
0,04333333	-0.00704	-0.00908	-0.01377	-0.03201	-0.00566	-0.00317	-0.00426	-0.0189	-0.00505	-0.00737	-0.0081	-0.01348	-0.00819	-0.00678	-0.00341	-0.01707	-0.00604	-0.0143
0,04666667	-0.00572	-0.0061	-0.01571	-0.0327	-0.01165	-0.00471	-0.00189	-0.01678	-0.00951	-0.00878	-0.00711	-0.01898	-0.00805	-0.00558	-0.0029	-0.01667	-0.00674	-0.01879
0,05	-0.00395	-0.00713	-0.01841	-0.03466	-0.00586	-0.00772	-0.00049	-0.01141	-0.00674	-0.00962	-0.00744	-0.01447	-0.01035	-0.00541	-0.004	-0.01917	-0.00709	-0.01892
0,05333333	-0.00691	-0.009	-0.01157	-0.03641	-0.00549	-0.0029	-0.00489	-0.01495	-0.00751	-0.00898	-0.01116	-0.01809	-0.01198	-0.00426	-0.00217	-0.02136	-0.00948	-0.01743
0,05666667	-0.00494	-0.01226	-0.01551	-0.03789	-0.01097	-0.00782	-0.00449	-0.01593	-0.00569	-0.00879	-0.00754	-0.01384	-0.01165	-0.00852	-0.00561	-0.0203	-0.0108	-0.01674
0,06	-0.00059	-0.01124	-0.01363	-0.03716	-0.01103	-0.00497	-0.00665	-0.0167	-0.01597	-0.01	-0.0088	-0.0177	-0.01468	-0.00903	-0.00536	-0.02426	-0.00918	-0.01906
0,06333333	0.0013	-0.011	-0.01539	-0.03737	-0.01033	-0.00306	-0.0089	-0.01705	-0.0096	-0.00992	-0.00994	-0.02132	-0.01725	-0.01206	-0.00651	-0.02758	-0.0112	-0.01838
0,06666667	0.001642	-0.01297	-0.01286	-0.03626	-0.01151	-0.00634	-0.01051	-0.01716	-0.00822	-0.01061	-0.00815	-0.02172	-0.01622	-0.01336	-0.00602	-0.02744	-0.01269	-0.0169
0,07	0.002736	-0.0108	-0.01478	-0.03537	-0.01194	-0.00244	-0.00715	-0.01364	-0.01297	-0.01126	-0.00555	-0.02026	-0.01438	-0.01196	-0.00585	-0.02779	-0.01254	-0.01803
0,07333333	0.006609	-0.01031	-0.01799	-0.0345	-0.008	-0.00726	-0.00569	-0.01287	-0.01485	-0.01314	-0.01507	-0.01921	-0.01493	-0.01239	-0.00379	-0.03112	-0.01178	-0.01724
0,07666667	0.004857	-0.01208	-0.01894	-0.03481	-0.01484	-0.00418	-0.00169	-0.01551	-0.01127	-0.01126	-0.00692	-0.0186	-0.01127	-0.01199	-0.00392	-0.03096	-0.0143	-0.0158
0,08	0.004376	-0.01172	-0.01695	-0.03494	-0.01657	-0.00802	-9.7e-05	-0.01698	-0.01245	-0.01014	-0.00893	-0.02386	-0.00938	-0.01139	-0.00215	-0.03045	-0.01386	-0.01428
0,08333333	0.004448	-0.0097	-0.01768	-0.03507	-0.01298	-0.00552	-0.00029	-0.01817	-0.01149	-0.00919	-0.01351	-0.01931	-0.00941	-0.01174	-0.00216	-0.03486	-0.01473	-0.01441
0,08666667	0.00603	-0.01373	-0.01993	-0.03595	-0.0126	-0.00761	0.001568	-0.01278	-0.012	-0.0104	-0.01309	-0.02275	-0.01161	-0.01574	-0.00143	-0.0326	-0.01437	-0.01762
0,09	0.002245	-0.01445	-0.01774	-0.03667	-0.01295	-0.00782	0.002016	-0.0137	-0.01758	-0.00837	-0.00756	-0.01979	-0.01219	-0.01641	-0.00072	-0.03146	-0.01511	-0.01964
0,09333333	0.003794	-0.01871	-0.01521	-0.03547	-0.01679	-0.00756	-0.00044	-0.01233	-0.01335	-0.01061	-0.01366	-0.02192	-0.01503	-0.01815	0.00111	-0.03283	-0.01446	-0.0159
0,09666667	0.005053	-0.01644	-0.01913	-0.03452	-0.01421	-0.01239	-0.00057	-0.01428	-0.01399	-0.01006	-0.00925	-0.01756	-0.01639	-0.0196	0.00054	-0.03275	-0.01297	-0.01454
0,1	0.004894	-0.00952	-0.01873	-0.03511	-0.01427	-0.00672	-0.00097	-0.01542	-0.01569	-0.01008	-0.0116	-0.02248	-0.01578	-0.02075	0.003028	-0.02859	-0.01309	-0.01948
0,10333333	0.003917	-0.01626	-0.01757	-0.03459	-0.013	-0.0064	-0.00399	-0.01952	-0.01152	-0.01007	-0.01316	-0.02268	-0.01721	-0.02112	0.004151	-0.03401	-0.01341	-0.02178
0,10666667	0.008836	-0.01294	-0.0177	-0.0348	-0.01337	-0.00888	-0.00564	-0.01903	-0.01338	-0.01175	-0.01467	-0.02024	-0.01894	-0.02172	0.006842	-0.03454	-0.01574	-0.017
0,11	0.008342	-0.01711	-0.02347	-0.03567	-0.0183	-0.01177	-0.00534	-0.01684	-0.01216	-0.01199	-0.01399	-0.02912	-0.01973	-0.02375	0.006231	-0.03358	-0.01671	-0.01387
0,11333333	0.008206	-0.01239	-0.01978	-0.03622	-0.01563	-0.00867	-0.00638	-0.01882	-0.01275	-0.0138	-0.01427	-0.02824	-0.02092	-0.0209	0.007785	-0.03715	-0.01663	-0.02056
0,11666667	0.008532	-0.01858	-0.02035	-0.03662	-0.01133	-0.0029	-0.00513	-0.02016	-0.01571	-0.01351	-0.01234	-0.02418	-0.02113	-0.02144	0.007707	-0.03887	-0.01718	-0.02299
0,12	0.011254	-0.01501	-0.01843	-0.03656	-0.01544	-0.0048	-0.00712	-0.01769	-0.01632	-0.01502	-0.01425	-0.02644	-0.02054	-0.02022	0.006853	-0.03811	-0.01736	-0.01703
0,12333333	0.007758	-0.01683	-0.02245	-0.03614	-0.01546	-0.00884	-0.00816	-0.01845	-0.02068	-0.01396	-0.01552	-0.02537	-0.01847	-0.02255	0.006032	-0.04017	-0.01712	-0.0189
0,12666667	0.007764	-0.01496	-0.02099	-0.03652	-0.01693	-0.00787	-0.00699	-0.02146	-0.01349	-0.01521	-0.01281	-0.02222	-0.01867	-0.02213	0.007372	-0.04221	-0.01578	-0.02703
0,13	0.007964	-0.01524	-0.01893	-0.03661	-0.01741	-0.00875	-0.00687	-0.01714	-0.01776	-0.0152	-0.01273	-0.02536	-0.01624	-0.02469	0.008128	-0.0399	-0.01723	-0.02281
0,13333333	0.006871	-0.0154	-0.01792	-0.03662	-0.0194	-0.00825	-0.0063	-0.02174	-0.01677	-0.01613	-0.01387	-0.02767	-0.01777	-0.02516	0.00894	-0.04434	-0.01832	-0.01801
0,13666667	0.004747	-0.01715	-0.02086	-0.03689	-0.01666	-0.0098	-0.00481	-0.02129	-0.01797	-0.01578	-0.01455	-0.02767	-0.02114	-0.02586	0.010781	-0.04605	-0.01818	-0.02399
0,14	0.005702	-0.01424	-0.0217	-0.03763	-0.0198	-0.00811	-0.00314	-0.02354	-0.01927	-0.01807	-0.01814	-0.0269	-0.02391	-0.02532	0.010109	-0.04817	-0.01671	-0.02516
0,14333333	0.004568	-0.01774	-0.02395	-0.0387	-0.01621	-0.0097	-0.00553	-0.01866	-0.01985	-0.01834	-0.01656	-0.02739	-0.02373	-0.02508	0.010801	-0.04629	-0.018	-0.01824
0,14666667	0.002807	-0.01269	-0.02003	-0.03851	-0.01372	-0.01151	-0.00496	-0.02298	-0.01836	-0.01935	-0.02253	-0.0283	-0.02501	-0.02529	0.010637	-0.04496	-0.01869	-0.02142
0,15	0.003225	-0.02016	-0.02472	-0.03785	-0.01758	-0.0111	-0.00656	-0.02174	-0.018	-0.02009	-0.01385	-0.02974	-0.02691	-0.02592	0.010115	-0.04277	-0.01749	-0.02491
0,15333333	0.002797	-0.0157	-0.02873	-0.03758	-0.01361	-0.01	-0.0067	-0.02526	-0.02244	-0.02001	-0.01109	-0.02958	-0.02404	-0.02756	0.009651	-0.04095	-0.01617	-0.01754
0,15666667	0.001011	-0.01579	-0.02295	-0.03699	-0.01821	-0.00946	-0.00692	-0.0222	-0.02457	-0.01929	-0.01818	-0.02976	-0.02378	-0.02838	0.010113	-0.03675	-0.01782	-0.01772
0,16	0.001513	-0.01956	-0.02576	-0.03496	-0.01786	-0.01084	-0.00632	-0.02507	-0.01974	-0.01915	-0.01286	-0.02311	-0.02338	-0.02625	0.008378	-0.03585	-0.01879	-0.02529
0,16333333	0.000299	-0.01421	-0.0271	-0.0361	-0.02121	-0.00968	-0.00775	-0.02212	-0.01794	-0.01921	-0.02118	-0.03148	-0.02444	-0.0238	0.008724	-0.03862	-0.0186	-0.02024
0,16666667	-0.00137	-0.01865	-0.02019	-0.0375	-0.01775	-0.00892	-0.00784	-0.01846	-0.01804	-0.01983	-0.01979	-0.03129	-0.02398	-0.02236	0.009136	-0.04007	-0.01894	-0.01911
0,17	-0.00197	-0.02047	-0.02402	-0.03833	-0.01905	-0.01505	-0.00947	-0.02202	-0.02092	-0.02177	-0.0162	-0.02881	-0.02298	-0.02301	0.008835	-0.04113	-0.02283	-0.02562
0,17333333	-0.00386	-0.02061	-0.02641	-0.03911	-0.02205	-0.01169	-0.00936	-0.02236	-0.02655	-0.02365	-0.01689	-0.02965	-0.02215	-0.0217	0.008669	-0.04262	-0.02156	-0.02189
0,17666667	-0.0052	-0.01852	-0.0256	-0.03983	-0.01885	-0.01549	-0.01237	-0.02637	-0.02692	-0.0255	-0.01808	-0.032	-0.02032	-0.02554	0.00917	-0.04685	-0.01985	-0.01809
0,18	-0.00483	-0.01741	-0.0219	-0.03973	-0.02011	-0.01416	-0.01258	-0.02386	-0.02332	-0.02654	-0.01724	-0.03457	-0.01969	-0.02883	0.009183	-0.0481	-0.02119	-0.02485
0,18333333	-0.00383	-0.02005	-0.02581	-0.03958	-0.01754	-0.01608	-0.01408	-0.02602	-0.02323	-0.0266	-0.01677	-0.03223	-0.01882	-0.02897	0.008692	-0.04524	-0.02376	-0.02197
0,18666667	-0.00176	-0.01746	-0.02524	-0.039	-0.02315	-0.00853	-0.01274	-0.02565	-0.02213	-0.02747	-0.02017	-0.03438	-0.0232	-0.02871	0.008331	-0.04671	-0.02116	-0.01928
0,19	0.00019	-0.02274	-0.02601	-0.03687	-0.01935	-0.00958	-0.01573	-0.02434	-0.02259	-0.02639	-0.02467	-0.02883	-0.02285	-0.02943	0.008321	-0.04733	-0.02282	-0.02543
0,19333333	0.001415	-0.01969	-0.02747	-0.03671	-0.01933	-0.01344	-0.01451	-0.02107	-0.02661	-0.02511	-0.02169	-0.03298	-0.02425	-0.02847	0.008062	-0.04666	-0.02701	-0.02122
0,19666667	0.003392	-0.01826	-0.02749	-0.03501	-0.01984	-0.0142	-0.01668	-0.02014	-0.02389	-0.0261	-0.02127	-0.03408	-0.02498	-0.02773	0.007167	-0.04795	-0.02637	-0.01896
0,2	0.003443	-0.02302	-0.02473	-0.03409	-0.02121	-0.01067	-0.01632	-0.0269	-0.02154	-0.02803	-0.01741	-0.03684	-0.02471	-0.02938	0.005921	-0.04858	-0.02353	-0.02349
0,20333333	-0.00085	-0.01877	-0.02514	-0.03472	-0.02156	-0.01662	-0.0199	-0.02965	-0.02626	-0.02814	-0.02279	-0.03353	-0.02466	-0.02749	0.006751	-0.04767	-0.02666	-0.01967
0,20666667	-0.0027	-0.02205	-0.02476	-0.03502	-0.02037	-0.01693	-0.02089	-0.02513	-0.02355	-0.02939	-0.02313	-0.03555	-0.02765	-0.02807	0.008505	-0.05015	-0.02503	-0.01834
0,21	-0.00399	-0.02111	-0.03003	-0.0367	-0.02102	-0.01424	-0.02174	-0.02302	-0.0264	-0.02979	-0.02371	-0.03178	-0.03066	-0.02784	0.008416	-0.05289	-0.02081	-0.023
0,21333333	-0.00728	-0.0182	-0.02595	-0.03798	-0.02101	-0.01057	-0.02069	-0.01987	-0.02365	-0.02865	-0.02247	-0.03683	-0.03013	-0.02694	0.009889	-0.0511	-0.02233	-0.01972
0,21666667	-0.00668	-0.01946	-0.02601	-0.03888	-0.02241	-0.0147	-0.0226	-0.02475	-0.02438	-0.02798	-0.01844	-0.03341	-0.03138	-0.02687	0.01105	-0.05252	-0.02372	-0.02159
0,22	-0.00406	-0.02119	-0.02712	-0.03771	-0.02525	-0.01181	-0.02121	-0.02586	-0.0218	-0.02965	-0.0209	-0.03449	-0.03072	-0.02807	0.011352	-0.05372	-0.01958	-0.02411
0,22333333	-0.0021	-0.0234	-0.03365	-0.03811	-0.02045	-0.0168	-0.02004	-0.02873	-0.02669	-0.03149	-0.01975	-0.03894	-0.02908	-0.02793	0.01068	-0.05199	-0.02234	-0.02039
0,22666667	-0.00151	-0.02641	-0.02994	-0.03757	-0.0232	-0.01123	-0.01997	-0.02631	-0.02924	-0.03391	-0.02066	-0.0342	-0.02712	-0.0279	0.011146	-0.05075	-0.02438	-0.02344
0,23	0.000504	-0.02148	-0.0288	-0.03715	-0.02519	-0.01143	-0.0228	-0.0281	-0.02679	-0.03521	-0.02222	-0.03663	-0.02673	-0.03048	0.010363	-0.05386	-0.02185	-0.02408
0,23333333	9.32e-05	-0.02514	-0.03275	-0.03757	-0.02451	-0.01662	-0.02355	-0.0295	-0.03023	-0.03562	-0.02159	-0.03903	-0.02798	-0.03116	0.010689	-0.05302	-0.02278	-0.02036
0,23666667	0.000653	-0.02114	-0.02708	-0.0394	-0.02054	-0.01556	-0.02471	-0.02428	-0.02791	-0.03359	-0.02434	-0.03608	-0.02516	-0.03085	0.010879	-0.05407	-0.02487	-0.0251
0,24	9.72e-05	-0.0235	-0.03144	-0.0411	-0.02415	-0.01568	-0.02525	-0.02367	-0.02787	-0.03167	-0.02656	-0.03896	-0.02498	-0.03074	0.009807	-0.05625	-0.02291	-0.02467
0,24333333	-0.00109	-0.02536	-0.02978	-0.0408	-0.02317	-0.01245	-0.02664	-0.02926	-0.02597	-0.03012	-0.02009	-0.03718	-0.0265	-0.03316	0.010639	-0.05625	-0.02535	-0.02341
0,24666667	-0.00456	-0.02641	-0.03319	-0.04143	-0.02564	-0.01719	-0.02546	-0.03105	-0.02818	-0.03087	-0.02429	-0.04113	-0.02936	-0.03204	0.010299	-0.05491	-0.02561	-0.02568
0,25	-0.00742	-0.02133	-0.02969	-0.04142	-0.02402	-0.01526	-0.02467	-0.03054	-0.02936	-0.03099	-0.02425	-0.03666	-0.02937	-0.03072	0.010514	-0.05698	-0.02611	-0.0235
0,25333333	-0.00413	-0.02518	-0.02812	-0.0402	-0.02597	-0.01411	-0.02542	-0.02919	-0.02939	-0.03374	-0.02473	-0.04247	-0.03116	-0.03145	0.008901	-0.05448	-0.02809	-0.02438
0,25666667	-0.00275	-0.02022	-0.03234	-0.04023	-0.0234	-0.0145	-0.0246	-0.03	-0.02939	-0.03364	-0.02159	-0.03672	-0.03272	-0.03107	0.009829	-0.05277	-0.02799	-0.02531
0,26	-0.00026	-0.02347	-0.03008	-0.04016	-0.02231	-0.01419	-0.02415	-0.03021	-0.03304	-0.0324	-0.02693	-0.04072	-0.03376	-0.02924	0.00806	-0.05893	-0.02605	-0.02184
0,26333333	0.002081	-0.01899	-0.03276	-0.04002	-0.02611	-0.01716	-0.02393	-0.0311	-0.03242	-0.02929	-0.02363	-0.03621	-0.03293	-0.02913	0.009463	-0.05821	-0.02698	-0.02449
0,26666667	0.005046	-0.02426	-0.03411	-0.0401	-0.02718	-0.01283	-0.02359	-0.02883	-0.0336	-0.02972	-0.02779	-0.04402	-0.03371	-0.03002	0.008943	-0.05815	-0.02524	-0.02457
0,27	0.000264	-0.02481	-0.03132	-0.04022	-0.02548	-0.01526	-0.02269	-0.03241	-0.03258	-0.02758	-0.02655	-0.03748	-0.03583	-0.03003	0.008785	-0.06025	-0.02648	-0.02346
0,27333333	-0.00147	-0.02399	-0.03337	-0.03982	-0.02699	-0.01114	-0.02341	-0.03274	-0.02661	-0.02835	-0.02355	-0.04326	-0.03687	-0.02959	0.007236	-0.06354	-0.02688	-0.02659
0,27666667	-0.00134	-0.02518	-0.03383	-0.03951	-0.03085	-0.01468	-0.02264	-0.0273	-0.03227	-0.02985	-0.02854	-0.03916	-0.03636	-0.02968	0.007704	-0.0583	-0.02693	-0.02966
0,28	-0.00033	-0.02403	-0.03514	-0.03926	-0.02832	-0.01933	-0.02271	-0.03476	-0.03235	-0.03174	-0.02254	-0.04201	-0.03775	-0.03031	0.006967	-0.06097	-0.02868	-0.03395
0,28333333	0.000755	-0.02878	-0.03286	-0.03856	-0.02512	-0.01771	-0.02412	-0.02855	-0.03162	-0.03128	-0.02759	-0.04624	-0.03706	-0.03118	0.007741	-0.06189	-0.0289	-0.0403
0,28666667	0.001932	-0.02479	-0.03677	-0.0401	-0.0283	-0.01673	-0.02399	-0.03026	-0.03136	-0.03198	-0.03019	-0.04291	-0.03737	-0.03236	0.009108	-0.0612	-0.02716	-0.0375
0,29	0.001545	-0.02393	-0.03399	-0.04137	-0.02321	-0.01766	-0.02546	-0.03181	-0.03265	-0.03249	-0.02511	-0.04079	-0.03912	-0.03338	0.010192	-0.05902	-0.02829	-0.0387
0,29333333	-0.00024	-0.03002	-0.03297	-0.04143	-0.02583	-0.01584	-0.02757	-0.03456	-0.03486	-0.03247	-0.02533	-0.04188	-0.03949	-0.03507	0.011059	-0.06339	-0.02911	-0.04356
0,29666667	-0.0013	-0.02379	-0.03708	-0.04321	-0.02666	-0.01747	-0.02788	-0.03283	-0.02669	-0.03449	-0.02549	-0.04104	-0.039	-0.03559	0.011024	-0.06041	-0.03011	-0.04223
0,3	-0.00479	-0.0252	-0.03245	-0.0436	-0.02963	-0.0183	-0.02693	-0.02964	-0.02861	-0.03496	-0.02487	-0.04237	-0.03931	-0.03528	0.010015	-0.06095	-0.03015	-0.03978
0,30333333	-0.00442	-0.02854	-0.03554	-0.04294	-0.0274	-0.01383	-0.02622	-0.03564	-0.03448	-0.03417	-0.02764	-0.0482	-0.03849	-0.03583	0.010847	-0.06318	-0.03079	-0.04117
0,30666667	-0.00392	-0.02771	-0.03303	-0.04278	-0.02941	-0.01567	-0.02778	-0.03263	-0.03566	-0.03462	-0.0286	-0.04252	-0.03842	-0.03642	0.010944	-0.06545	-0.03125	-0.04428
0,31	-0.00533	-0.02137	-0.03871	-0.04414	-0.02539	-0.01761	-0.02801	-0.0335	-0.03418	-0.03598	-0.02822	-0.03884	-0.0376	-0.03367	0.010984	-0.06211	-0.03153	-0.04431
0,31333333	-0.00758	-0.02733	-0.03644	-0.04251	-0.02576	-0.01514	-0.02899	-0.03398	-0.03641	-0.0364	-0.02697	-0.04223	-0.04013	-0.03232	0.011005	-0.06494	-0.03148	-0.03972
0,31666667	-0.00823	-0.02897	-0.03721	-0.04297	-0.02858	-0.01835	-0.02908	-0.03383	-0.03398	-0.03727	-0.02998	-0.03919	-0.03957	-0.03177	0.011293	-0.06395	-0.03221	-0.04043
0,32	-0.0093	-0.02236	-0.04075	-0.04355	-0.02973	-0.01722	-0.0304	-0.0372	-0.03504	-0.0379	-0.03027	-0.04843	-0.04178	-0.03053	0.010551	-0.06147	-0.03291	-0.0435
0,32333333	-0.01133	-0.02235	-0.03624	-0.04268	-0.02811	-0.0211	-0.03171	-0.03641	-0.03587	-0.03763	-0.02715	-0.04596	-0.04033	-0.02982	0.010858	-0.06375	-0.03403	-0.0428
0,32666667	-0.01052	-0.0294	-0.03696	-0.0426	-0.028	-0.01912	-0.03132	-0.03409	-0.03655	-0.0375	-0.02927	-0.0498	-0.0418	-0.03123	0.010871	-0.0633	-0.0339	-0.03588
0,33	-0.01016	-0.02637	-0.04044	-0.04399	-0.02919	-0.01907	-0.03258	-0.03582	-0.03828	-0.03762	-0.02568	-0.04506	-0.03844	-0.03274	0.010243	-0.06365	-0.03361	-0.03817
0,33333333	-0.00904	-0.02854	-0.0367	-0.04409	-0.03112	-0.01635	-0.03483	-0.03623	-0.04261	-0.03878	-0.03115	-0.04776	-0.03886	-0.0344	0.0098	-0.06698	-0.03317	-0.04309
0,33666667	-0.00647	-0.02805	-0.03752	-0.04348	-0.02872	-0.01699	-0.03585	-0.03789	-0.04056	-0.03722	-0.031	-0.04664	-0.0393	-0.03425	0.009151	-0.0702	-0.03296	-0.0428
0,34	-0.00275	-0.03026	-0.04016	-0.04288	-0.02912	-0.01364	-0.03444	-0.03677	-0.03586	-0.0377	-0.02635	-0.04835	-0.03804	-0.03504	0.007627	-0.06487	-0.03222	-0.03984
0,34333333	-0.0027	-0.0251	-0.03776	-0.04261	-0.02708	-0.01689	-0.03408	-0.03848	-0.03403	-0.03879	-0.02948	-0.04954	-0.03689	-0.03586	0.007317	-0.06843	-0.03277	-0.04182
0,34666667	-0.00043	-0.0301	-0.03582	-0.04283	-0.03307	-0.01631	-0.03294	-0.03952	-0.03747	-0.03954	-0.03011	-0.04472	-0.03839	-0.0365	0.008541	-0.06927	-0.03121	-0.04515
0,35	0.000656	-0.03641	-0.03721	-0.04275	-0.02991	-0.02181	-0.03228	-0.03687	-0.03491	-0.03965	-0.03229	-0.04969	-0.03811	-0.03683	0.008674	-0.06715	-0.03269	-0.04228
0,35333333	-0.00096	-0.0303	-0.03466	-0.04309	-0.03327	-0.01855	-0.03243	-0.04108	-0.04277	-0.0421	-0.02895	-0.04789	-0.03598	-0.03892	0.007912	-0.06866	-0.03355	-0.0388
0,35666667	-0.00387	-0.03077	-0.0393	-0.04386	-0.03271	-0.01922	-0.02998	-0.0404	-0.04187	-0.03989	-0.03405	-0.04673	-0.0368	-0.03883	0.008891	-0.0717	-0.03401	-0.0414
0,36	-0.00542	-0.02854	-0.04052	-0.04368	-0.03022	-0.01931	-0.03007	-0.03727	-0.03547	-0.04014	-0.03424	-0.04977	-0.03743	-0.03973	0.007351	-0.07015	-0.03564	-0.04756
0,36333333	-0.0066	-0.0297	-0.03843	-0.04353	-0.03106	-0.01926	-0.02941	-0.03569	-0.04048	-0.03863	-0.03123	-0.05442	-0.03622	-0.03926	0.005801	-0.06947	-0.03642	-0.04411
0,36666667	-0.00757	-0.03112	-0.04291	-0.04403	-0.03063	-0.01902	-0.02822	-0.03644	-0.04083	-0.03641	-0.03251	-0.04929	-0.03676	-0.03801	0.005677	-0.07232	-0.0387	-0.04172
0,37	-0.01081	-0.03332	-0.03686	-0.04459	-0.03229	-0.01999	-0.02775	-0.04229	-0.04007	-0.03635	-0.03548	-0.05	-0.0365	-0.03662	0.005652	-0.06896	-0.03675	-0.04561
0,37333333	-0.0129	-0.02736	-0.0385	-0.04469	-0.02911	-0.02215	-0.02896	-0.03524	-0.03726	-0.03862	-0.03114	-0.05437	-0.03776	-0.03676	0.005466	-0.06936	-0.0393	-0.04827
0,37666667	-0.01429	-0.03104	-0.03486	-0.04527	-0.02748	-0.02084	-0.02951	-0.03882	-0.03907	-0.03798	-0.03243	-0.05274	-0.03852	-0.03603	0.005855	-0.07169	-0.03688	-0.04243
0,38	-0.01487	-0.03261	-0.03754	-0.04583	-0.03236	-0.02015	-0.03009	-0.03802	-0.03523	-0.03756	-0.03276	-0.04971	-0.04158	-0.03829	0.006426	-0.07267	-0.03718	-0.03942
0,38333333	-0.01543	-0.0333	-0.04255	-0.04438	-0.02806	-0.0235	-0.03224	-0.03825	-0.03708	-0.0385	-0.03352	-0.05177	-0.04287	-0.0379	0.006635	-0.07322	-0.03469	-0.0442
0,38666667	-0.01238	-0.03229	-0.03934	-0.04341	-0.03254	-0.02392	-0.03245	-0.04067	-0.04029	-0.03849	-0.03483	-0.05279	-0.042	-0.03774	0.007246	-0.07817	-0.0348	-0.0465
0,39	-0.00945	-0.03306	-0.03874	-0.04395	-0.03455	-0.02102	-0.03443	-0.03819	-0.0429	-0.03961	-0.03164	-0.05067	-0.04116	-0.03712	0.007199	-0.07787	-0.03621	-0.04283
0,39333333	-0.00595	-0.03078	-0.03958	-0.0435	-0.03567	-0.0203	-0.03601	-0.04123	-0.04056	-0.04064	-0.03188	-0.04973	-0.04145	-0.03761	0.006763	-0.07418	-0.03513	-0.04277
0,39666667	-0.00375	-0.03608	-0.0417	-0.04306	-0.03375	-0.01864	-0.03634	-0.03782	-0.04295	-0.04298	-0.03548	-0.04954	-0.04104	-0.03541	0.007128	-0.07692	-0.03774	-0.05062
0,4	-0.00554	-0.02813	-0.0439	-0.04387	-0.03738	-0.02214	-0.03533	-0.04008	-0.04194	-0.04443	-0.03406	-0.05629	-0.04121	-0.03619	0.006058	-0.07414	-0.03594	-0.05071
0,40333333	-0.00652	-0.03289	-0.04194	-0.04582	-0.03449	-0.02242	-0.03477	-0.03851	-0.04802	-0.04586	-0.03336	-0.05559	-0.04289	-0.03773	0.006832	-0.0733	-0.038	-0.04362
0,40666667	-0.00717	-0.02953	-0.04002	-0.04463	-0.03489	-0.02219	-0.03378	-0.04099	-0.04673	-0.047	-0.03647	-0.05426	-0.0438	-0.03795	0.006958	-0.07691	-0.03553	-0.04296
0,41	-0.00873	-0.03325	-0.04974	-0.04527	-0.0334	-0.02086	-0.03103	-0.0439	-0.03875	-0.04667	-0.03603	-0.05527	-0.04453	-0.03651	0.008761	-0.07915	-0.0386	-0.04968
0,41333333	-0.00942	-0.03237	-0.04119	-0.0446	-0.03425	-0.02534	-0.02931	-0.04101	-0.04195	-0.04732	-0.03615	-0.05424	-0.04374	-0.0381	0.008416	-0.07624	-0.03776	-0.04537
0,41666667	-0.00674	-0.03284	-0.04756	-0.0449	-0.0337	-0.01832	-0.02854	-0.04168	-0.04654	-0.04691	-0.03518	-0.0544	-0.04486	-0.03833	0.009411	-0.07868	-0.03981	-0.03963
0,42	-0.00978	-0.03355	-0.04345	-0.04366	-0.03404	-0.02198	-0.02896	-0.04118	-0.04316	-0.04708	-0.03878	-0.057	-0.04401	-0.03854	0.008554	-0.07958	-0.04126	-0.0456
0,42333333	-0.01166	-0.03417	-0.04441	-0.04452	-0.03352	-0.02729	-0.02874	-0.04074	-0.04849	-0.04721	-0.03448	-0.05533	-0.04241	-0.04045	0.008226	-0.07367	-0.04101	-0.05002
0,42666667	-0.01382	-0.0354	-0.043	-0.04472	-0.03506	-0.02436	-0.0292	-0.04497	-0.04523	-0.04755	-0.0348	-0.05756	-0.04223	-0.04262	0.007064	-0.07668	-0.04162	-0.04319
0,43	-0.01644	-0.03725	-0.04605	-0.04521	-0.03775	-0.0199	-0.02969	-0.03987	-0.04687	-0.04825	-0.03243	-0.05736	-0.04276	-0.04325	0.005209	-0.07476	-0.03947	-0.04287
0,43333333	-0.02022	-0.03493	-0.04408	-0.04575	-0.03637	-0.02302	-0.02955	-0.04179	-0.04387	-0.04982	-0.03543	-0.05509	-0.04204	-0.04369	0.004568	-0.07521	-0.04164	-0.05153
0,43666667	-0.01891	-0.03739	-0.04692	-0.04567	-0.03403	-0.0196	-0.02928	-0.04407	-0.04948	-0.05025	-0.04082	-0.05914	-0.04249	-0.0428	0.002879	-0.07391	-0.03966	-0.04893
0,44	-0.01725	-0.0304	-0.0439	-0.04616	-0.03915	-0.01703	-0.03016	-0.04224	-0.047	-0.05049	-0.03785	-0.0543	-0.04443	-0.0436	0.002244	-0.07645	-0.03986	-0.04433
0,44333333	-0.01343	-0.03675	-0.04851	-0.04563	-0.03305	-0.02317	-0.03094	-0.04173	-0.04808	-0.05018	-0.03391	-0.0569	-0.04515	-0.04305	0.002274	-0.07249	-0.0384	-0.04848
0,44666667	-0.01226	-0.03485	-0.04794	-0.0461	-0.03473	-0.02601	-0.03018	-0.0433	-0.0491	-0.05215	-0.04099	-0.05651	-0.04491	-0.04306	0.003739	-0.07322	-0.03935	-0.05105
0,45	-0.01096	-0.03509	-0.04516	-0.0475	-0.03505	-0.02153	-0.03126	-0.043	-0.04898	-0.05059	-0.04348	-0.06023	-0.04723	-0.04461	0.003781	-0.07373	-0.03827	-0.04369
0,45333333	-0.00731	-0.03943	-0.0486	-0.04832	-0.03579	-0.02186	-0.03191	-0.04455	-0.04737	-0.05153	-0.03868	-0.05861	-0.04865	-0.04488	0.004866	-0.07242	-0.03969	-0.0444
0,45666667	-0.00562	-0.03698	-0.04668	-0.04867	-0.0401	-0.02568	-0.03239	-0.04361	-0.04986	-0.05062	-0.04314	-0.06128	-0.04835	-0.04297	0.00557	-0.07331	-0.04049	-0.0517
0,46	-0.0074	-0.03642	-0.05221	-0.04976	-0.03932	-0.02477	-0.03387	-0.0438	-0.04629	-0.05194	-0.03869	-0.06165	-0.04946	-0.04349	0.006367	-0.07719	-0.04061	-0.04936
0,46333333	-0.00575	-0.03346	-0.05311	-0.05089	-0.03761	-0.02335	-0.03524	-0.04314	-0.04669	-0.04928	-0.03956	-0.05807	-0.05042	-0.04282	0.006786	-0.07794	-0.04169	-0.04551
0,46666667	-0.00438	-0.03616	-0.04697	-0.04938	-0.03756	-0.02736	-0.03412	-0.0487	-0.04535	-0.05111	-0.03493	-0.05529	-0.04965	-0.0406	0.007226	-0.07393	-0.04135	-0.05146
0,47	-0.00689	-0.03847	-0.04787	-0.04954	-0.03701	-0.02486	-0.034	-0.04005	-0.04896	-0.04972	-0.03862	-0.06004	-0.05278	-0.04044	0.006817	-0.07613	-0.0414	-0.05278
0,47333333	-0.00875	-0.03922	-0.05038	-0.04969	-0.03702	-0.02499	-0.03403	-0.04981	-0.04719	-0.04976	-0.03797	-0.05681	-0.05503	-0.04088	0.007248	-0.07506	-0.03963	-0.04563
0,47666667	-0.01093	-0.03938	-0.04932	-0.04824	-0.03462	-0.02741	-0.03419	-0.04413	-0.05405	-0.04904	-0.03644	-0.05962	-0.05388	-0.0418	0.006129	-0.07172	-0.04055	-0.04651
0,48	-0.01186	-0.03814	-0.04848	-0.04835	-0.03995	-0.02934	-0.0338	-0.04414	-0.04961	-0.04963	-0.03844	-0.061	-0.05622	-0.04145	0.004472	-0.07233	-0.0401	-0.05157
0,48333333	-0.01148	-0.0417	-0.05123	-0.04923	-0.03641	-0.02492	-0.03615	-0.05504	-0.04969	-0.0482	-0.04527	-0.05937	-0.05637	-0.04299	0.003969	-0.07388	-0.04243	-0.04553
0,48666667	-0.01212	-0.04074	-0.04702	-0.04963	-0.0394	-0.02418	-0.03612	-0.05114	-0.04942	-0.05012	-0.03967	-0.06263	-0.05493	-0.04223	0.00396	-0.07055	-0.04189	-0.04336
0,49	-0.01381	-0.03322	-0.04965	-0.04935	-0.03676	-0.02326	-0.03623	-0.0462	-0.05086	-0.04989	-0.03637	-0.06393	-0.05498	-0.04278	0.003621	-0.07228	-0.0438	-0.05011
0,49333333	-0.01281	-0.03774	-0.09532	-0.05085	-0.04065	-0.02276	-0.03532	-0.047	-0.09302	-0.05131	-0.04232	-0.10224	-0.05777	-0.04217	0.003274	-0.07426	-0.04346	-0.05044
0,49666667	0.043245	-0.03452	-0.08988	0.079221	-0.04009	0.023023	0.038807	-0.08699	-0.08497	-0.02156	-0.07651	-0.09351	0.003518	-0.08671	0.10854	-0.16946	0.023116	0.089693
0,5	0.059387	-0.02934	-0.08621	0.074175	-0.03627	0.027146	0.046484	-0.07933	-0.07336	-0.0062	-0.06711	-0.07354	0.004581	-0.0789	0.111992	-0.18284	0.036007	0.078782
0,50333333	0.063406	-0.02961	-0.08382	0.080903	-0.02587	0.027869	0.059938	-0.07305	-0.06173	0.011824	-0.06182	-0.06495	0.008462	-0.05669	0.124455	-0.15517	0.041907	0.096772
0,50666667	0.063506	-0.0242	-0.0801	0.077758	-0.02629	0.033567	0.073592	-0.07132	-0.05779	0.033352	-0.05347	-0.05165	0.00807	-0.05298	0.129243	-0.14297	0.049189	0.112936
0,51	0.057544	-0.02103	-0.07648	0.081662	-0.02018	0.036214	0.078697	-0.06745	-0.04917	0.042232	-0.05093	-0.04568	0.007772	-0.02477	0.14282	-0.13292	0.070959	0.137568
0,51333333	0.067335	-0.02079	-0.07846	0.083302	-0.02017	0.034209	0.090607	-0.06765	-0.04628	0.057104	-0.04092	-0.03591	0.00943	-0.01081	0.145655	-0.12506	0.083118	0.14915
0,51666667	0.068975	-0.01721	-0.07925	0.086479	-0.01994	0.037527	0.100775	-0.05919	-0.03759	0.072164	-0.03931	-0.02004	0.010103	-0.00126	0.148004	-0.11107	0.091512	0.173052
0,52	0.070264	-0.01316	-0.08121	0.087314	-0.02009	0.037424	0.108669	-0.05124	-0.03442	0.084771	-0.03429	-0.01565	0.010726	-0.00021	0.15198	-0.10353	0.097232	0.194815
0,52333333	0.071404	-0.01338	-0.07993	0.090123	-0.01704	0.039258	0.115058	-0.05065	-0.02374	0.094384	-0.02978	-0.00389	0.009478	0.003686	0.15109	-0.09742	0.10529	0.220233
0,52666667	0.075232	-0.01285	-0.07874	0.091534	-0.01315	0.038601	0.121375	-0.04763	-0.01565	0.106279	-0.02358	0.004088	0.009222	0.014831	0.154647	-0.09171	0.111924	0.245283
0,53	0.074647	-0.01075	-0.08312	0.092404	-0.01526	0.039872	0.125373	-0.04515	-0.01281	0.11779	-0.02362	0.010097	0.009929	0.015236	0.153069	-0.08619	0.110865	0.265232
0,53333333	0.073395	-0.01145	-0.07598	0.09396	-0.0152	0.037258	0.133957	-0.03904	-0.00835	0.128772	-0.01558	0.023217	0.010564	0.022059	0.158001	-0.08096	0.117027	0.273534
0,53666667	0.07232	-0.01681	-0.07535	0.094443	-0.01189	0.043528	0.140084	-0.03885	-0.00442	0.13994	-0.01182	0.032259	0.00992	0.031356	0.156433	-0.07707	0.126082	0.272792
0,54	0.074135	-0.00773	-0.08079	0.095119	-0.01163	0.047412	0.145683	-0.03345	0.004459	0.151377	-0.00983	0.039258	0.013778	0.034568	0.159762	-0.0735	0.127022	0.269402
0,54333333	0.072974	-0.01192	-0.07588	0.095714	-0.00987	0.044948	0.152866	-0.02853	0.005275	0.161682	-0.00885	0.050886	0.01455	0.024108	0.158639	-0.06896	0.131591	0.270433
0,54666667	0.072248	-0.01021	-0.07248	0.097585	-0.00909	0.045176	0.158448	-0.03014	0.011394	0.174866	0.002125	0.056235	0.015523	0.023104	0.162073	-0.06758	0.13624	0.279722
0,55	0.073708	-0.01051	-0.0716	0.099321	-0.00979	0.039105	0.163392	-0.02206	0.013437	0.187669	0.002863	0.06191	0.012124	0.025647	0.160325	-0.06334	0.139843	0.295717
0,55333333	0.075376	-0.00791	-0.06994	0.103258	-0.00468	0.046044	0.167868	-0.01799	0.016838	0.19896	0.009392	0.06951	0.014257	0.033181	0.163254	-0.05989	0.141012	0.306432
0,55666667	0.07483	-0.00738	-0.07492	0.105559	-0.00527	0.048071	0.173653	-0.02007	0.025064	0.210463	0.012789	0.08459	0.014236	0.029697	0.165838	-0.05706	0.146619	0.308173
0,56	0.077929	-0.01117	-0.07444	0.108465	-0.0031	0.050264	0.176816	-0.01255	0.032177	0.223547	0.015802	0.091831	0.014297	0.040641	0.164764	-0.05431	0.147882	0.307356
0,56333333	0.078375	-0.00976	-0.06996	0.10966	-0.00122	0.048386	0.181901	-0.01301	0.031905	0.235188	0.016881	0.099099	0.01474	0.04783	0.167401	-0.04901	0.150223	0.307819
0,56666667	0.07664	-0.01315	-0.07246	0.110394	-0.00244	0.046219	0.185856	-0.01556	0.041726	0.248699	0.020118	0.111366	0.016482	0.045084	0.169626	-0.04926	0.155125	0.313903
0,57	0.076101	-0.00435	-0.06778	0.108915	0.00296	0.051603	0.19077	-0.00849	0.044628	0.262507	0.025016	0.121576	0.016666	0.043221	0.169268	-0.04868	0.157028	0.318895
0,57333333	0.075404	-0.00623	-0.06943	0.11015	0.003005	0.049807	0.195378	-0.00503	0.045927	0.276761	0.031017	0.128051	0.016133	0.052852	0.168067	-0.04653	0.16438	0.324645
0,57666667	0.073429	-0.00523	-0.07148	0.110376	0.005672	0.050897	0.201946	-0.00198	0.050542	0.290236	0.034443	0.14333	0.018031	0.049154	0.169844	-0.04431	0.161157	0.326875
0,58	0.07363	-0.00454	-0.07211	0.112144	0.007817	0.055089	0.207326	-0.00195	0.054985	0.301458	0.03788	0.150657	0.017845	0.04973	0.168351	-0.04214	0.171366	0.331688
0,58333333	0.074893	-0.00267	-0.07032	0.112422	0.006814	0.054948	0.213485	0.004559	0.062557	0.315593	0.0499	0.158331	0.020072	0.054523	0.16835	-0.03852	0.168243	0.336118
0,58666667	0.075576	-0.00077	-0.06875	0.115866	0.010757	0.056643	0.218831	0.007239	0.068204	0.327479	0.050941	0.167527	0.018949	0.051069	0.168869	-0.03545	0.173829	0.340211
0,59	0.075482	-0.00357	-0.06607	0.116222	0.012882	0.055443	0.223659	0.008092	0.074058	0.340594	0.059158	0.177287	0.018498	0.052381	0.170251	-0.03237	0.170685	0.343081
0,59333333	0.076468	-0.00337	-0.07063	0.118573	0.014136	0.061178	0.228617	0.011959	0.075861	0.354875	0.059481	0.19209	0.018057	0.055939	0.171512	-0.03148	0.17606	0.348475
0,59666667	0.076235	-0.00109	-0.06518	0.119794	0.019198	0.060277	0.234451	0.015658	0.079319	0.37184	0.063668	0.201569	0.015906	0.057559	0.172567	-0.03115	0.173925	0.353418
0,6	0.075071	0.000367	-0.06876	0.122752	0.017204	0.064543	0.239197	0.015781	0.08507	0.391156	0.067023	0.206479	0.016163	0.059684	0.174035	-0.03022	0.176691	0.353688
0,60333333	0.073827	-0.00297	-0.06501	0.125058	0.022279	0.066229	0.243627	0.020155	0.090644	0.408904	0.072151	0.218891	0.015824	0.064325	0.177162	-0.02815	0.181882	0.350657
0,60666667	0.07494	-0.00379	-0.06339	0.127355	0.027061	0.059929	0.249827	0.023063	0.095732	0.426632	0.083308	0.227848	0.016369	0.069999	0.177014	-0.0265	0.181067	0.355378
0,61	0.073107	-0.00324	-0.06303	0.128641	0.025275	0.066431	0.255013	0.025064	0.10015	0.441958	0.08339	0.232215	0.014705	0.06821	0.176182	-0.02371	0.186663	0.362056
0,61333333	0.073223	-0.00262	-0.06262	0.131089	0.029489	0.063641	0.259319	0.027971	0.102548	0.457573	0.091065	0.251727	0.016605	0.06928	0.181894	-0.02168	0.184101	0.368255
0,61666667	0.072958	0.003174	-0.06457	0.132338	0.033496	0.072444	0.266239	0.033667	0.109883	0.472454	0.095143	0.257495	0.016376	0.068133	0.183032	-0.0192	0.18854	0.363823
0,62	0.071005	0.000819	-0.06471	0.13288	0.035377	0.066785	0.27279	0.030799	0.113693	0.487442	0.095594	0.266998	0.016587	0.068591	0.183416	-0.01804	0.185183	0.365901
0,62333333	0.068924	0.00428	-0.06997	0.135502	0.03846	0.069727	0.27715	0.035641	0.113509	0.501562	0.103612	0.278068	0.014836	0.066254	0.186397	-0.01851	0.188557	0.373552
0,62666667	0.06779	-5.1e-05	-0.06214	0.137422	0.041961	0.078446	0.282926	0.038903	0.121049	0.517761	0.106896	0.293839	0.016044	0.068113	0.188422	-0.01883	0.19188	0.383227
0,63	0.06652	0.003289	-0.06503	0.138403	0.04888	0.072182	0.289455	0.04037	0.133089	0.534882	0.111771	0.301142	0.014714	0.067698	0.185571	-0.01641	0.194255	0.372096
0,63333333	0.066167	0.005871	-0.06227	0.141769	0.04753	0.076224	0.296132	0.042101	0.134641	0.554121	0.116305	0.31218	0.016086	0.069134	0.18653	-0.01295	0.196918	0.369015
0,63666667	0.068188	0.008271	-0.06374	0.143598	0.052835	0.082402	0.302816	0.047254	0.138377	0.569146	0.122096	0.319232	0.01591	0.071116	0.185992	-0.0124	0.200317	0.381082
0,64	0.067572	0.000646	-0.06523	0.14611	0.056848	0.081712	0.309463	0.047276	0.142419	0.586004	0.126016	0.337023	0.017591	0.072976	0.185887	-0.00755	0.199285	0.391853
0,64333333	0.069101	0.005928	-0.06395	0.148004	0.058664	0.082836	0.315733	0.051794	0.144787	0.601545	0.131207	0.346553	0.018227	0.073215	0.185805	-0.00516	0.200046	0.380782
0,64666667	0.067629	0.004105	-0.06081	0.152009	0.066469	0.087804	0.322058	0.053152	0.151517	0.615063	0.140706	0.35924	0.020362	0.073871	0.187448	-0.00464	0.203849	0.380822
0,65	0.068512	0.004879	-0.05838	0.154498	0.068812	0.0871	0.328058	0.05793	0.15579	0.627571	0.144324	0.367052	0.018192	0.07426	0.18542	-0.00471	0.20217	0.393724
0,65333333	0.068046	0.004558	-0.05908	0.157876	0.074493	0.087483	0.334131	0.056511	0.163362	0.643585	0.147622	0.384333	0.019286	0.074669	0.185559	-0.00136	0.205535	0.401368
0,65666667	0.071966	0.009885	-0.05505	0.160018	0.076172	0.091443	0.340744	0.060347	0.167158	0.659001	0.152268	0.391163	0.018458	0.073577	0.186142	-0.00094	0.207697	0.389018
0,66	0.071041	0.009837	-0.05516	0.162577	0.082106	0.09017	0.347614	0.064449	0.171294	0.674606	0.15949	0.399413	0.018683	0.075075	0.186636	0.000787	0.204912	0.389776
0,66333333	0.071461	0.008437	-0.05703	0.165516	0.087438	0.093938	0.353996	0.069055	0.175827	0.695718	0.165495	0.406426	0.016886	0.072226	0.186574	0.004419	0.210185	0.403502
0,66666667	0.073593	0.008713	-0.06111	0.167897	0.088177	0.101849	0.3608	0.068731	0.180694	0.712963	0.166329	0.419112	0.015837	0.067598	0.189134	0.005596	0.209382	0.406819
0,67	0.075289	0.011133	-0.0563	0.170606	0.093645	0.100157	0.367293	0.076425	0.187259	0.729472	0.176097	0.433359	0.014627	0.069043	0.187533	0.00623	0.208564	0.392821
0,67333333	0.071632	0.01	-0.05744	0.172739	0.101422	0.097318	0.374352	0.079392	0.192093	0.745071	0.175938	0.441468	0.013985	0.068779	0.184949	0.007659	0.216495	0.398918
0,67666667	0.071445	0.010928	-0.05563	0.176317	0.103633	0.105997	0.380469	0.082799	0.193463	0.762004	0.183854	0.452672	0.013105	0.069819	0.186305	0.008336	0.213223	0.414602
0,68	0.071403	0.014599	-0.0557	0.178122	0.111229	0.108598	0.38679	0.081888	0.198882	0.773359	0.191874	0.462231	0.011808	0.072491	0.185074	0.008124	0.213737	0.407266
0,68333333	0.070972	0.016956	-0.06022	0.182747	0.115647	0.114114	0.395004	0.084861	0.203459	0.787838	0.196505	0.478548	0.013714	0.078921	0.184382	0.010105	0.222738	0.398578
0,68666667	0.068589	0.015783	-0.05244	0.18693	0.115899	0.115673	0.401534	0.088191	0.215103	0.801773	0.199238	0.485472	0.014369	0.077576	0.18716	0.011995	0.21767	0.414933
0,69	0.07039	0.014484	-0.05996	0.191406	0.122432	0.117571	0.407721	0.090565	0.216472	0.816765	0.208595	0.496385	0.013859	0.077118	0.188003	0.012153	0.216951	0.422623
0,69333333	0.070549	0.016978	-0.05334	0.195703	0.13307	0.116971	0.412531	0.092195	0.220991	0.830747	0.210486	0.509053	0.013036	0.073912	0.186019	0.015079	0.22575	0.406956
0,69666667	0.06951	0.019746	-0.05025	0.199433	0.134572	0.120572	0.419135	0.096921	0.229266	0.849218	0.217265	0.524355	0.013034	0.079455	0.185332	0.016157	0.221	0.412195
0,7	0.066645	0.017053	-0.04813	0.203766	0.140768	0.126269	0.423746	0.102693	0.230382	0.866554	0.221265	0.535441	0.013953	0.080532	0.184529	0.016022	0.216899	0.428921
0,70333333	0.070091	0.021419	-0.05257	0.207299	0.143897	0.129826	0.429101	0.1017	0.235524	0.883325	0.225513	0.543791	0.009341	0.080752	0.182842	0.017246	0.226572	0.417427
0,70666667	0.069339	0.020979	-0.05254	0.21101	0.149292	0.128902	0.432742	0.10776	0.24102	0.898407	0.232782	0.556971	0.009105	0.08204	0.182512	0.020358	0.224341	0.410355
0,71	0.069339	0.021345	-0.05131	0.214972	0.157485	0.135729	0.440389	0.103307	0.248712	0.912261	0.233423	0.567962	0.00946	0.084001	0.183752	0.019506	0.219479	0.429888
0,71333333	0.073075	0.022012	-0.05407	0.21843	0.162919	0.135436	0.446094	0.112816	0.257426	0.927406	0.240277	0.578918	0.008597	0.078661	0.187098	0.02359	0.228658	0.426453
0,71666667	0.075933	0.023273	-0.04603	0.222463	0.170206	0.13891	0.453838	0.114807	0.26015	0.942191	0.250881	0.587055	0.005679	0.077719	0.189939	0.023414	0.22929	0.411501
0,72	0.073187	0.023616	-0.05044	0.22711	0.177464	0.141135	0.461094	0.119029	0.260755	0.955947	0.253023	0.602042	0.010043	0.07927	0.192779	0.024186	0.22269	0.428202
0,72333333	0.074115	0.0268	-0.0419	0.232517	0.185401	0.145334	0.468594	0.117458	0.269099	0.970816	0.26156	0.614111	0.009128	0.083396	0.19327	0.022241	0.227924	0.432482
0,72666667	0.075312	0.028146	-0.04834	0.238195	0.191445	0.151329	0.473647	0.121039	0.269996	0.98536	0.264303	0.620146	0.009689	0.082095	0.192676	0.023421	0.233279	0.416985
0,73	0.073851	0.028065	-0.044	0.244163	0.195566	0.151132	0.479459	0.122258	0.279256	0.997849	0.268191	0.639522	0.009694	0.08349	0.189559	0.021315	0.224843	0.427286
0,73333333	0.072629	0.023243	-0.04315	0.24931	0.204772	0.156664	0.486409	0.130975	0.283803	1.01025	0.277639	0.642146	0.010646	0.085461	0.18877	0.024035	0.227731	0.438486
0,73666667	0.073208	0.024552	-0.04386	0.254657	0.210396	0.156532	0.492319	0.132366	0.289651	1.02197	0.280527	0.656479	0.008786	0.087461	0.186879	0.021981	0.236239	0.423457
0,74	0.07311	0.028059	-0.04129	0.259306	0.215725	0.169133	0.499205	0.134255	0.293826	1.03285	0.284934	0.662301	0.012023	0.085661	0.19075	0.026407	0.229936	0.428764
0,74333333	0.07417	0.029034	-0.03817	0.263136	0.219472	0.167491	0.506466	0.137046	0.302928	1.04626	0.281941	0.678345	0.012089	0.091395	0.193164	0.027541	0.226453	0.44196
0,74666667	0.076275	0.032825	-0.04191	0.268512	0.230025	0.169825	0.513065	0.140545	0.304282	1.05933	0.293494	0.690747	0.012319	0.091958	0.197153	0.027959	0.236813	0.430395
0,75	0.076839	0.025184	-0.04385	0.274229	0.242627	0.174345	0.519743	0.142168	0.307058	1.07615	0.300965	0.697987	0.012657	0.089692	0.194973	0.028313	0.236385	0.430678
0,75333333	0.077833	0.030435	-0.03817	0.277906	0.246391	0.178878	0.524471	0.145956	0.319	1.09098	0.30416	0.704729	0.012474	0.086787	0.195452	0.032557	0.228802	0.446135
0,75666667	0.080431	0.033004	-0.04225	0.28313	0.254391	0.182121	0.531052	0.146572	0.318805	1.10562	0.310964	0.718873	0.010461	0.087776	0.192809	0.031841	0.236766	0.434603
0,76	0.080661	0.033099	-0.03948	0.288303	0.257412	0.185398	0.537462	0.150781	0.327165	1.11937	0.31579	0.725467	0.010317	0.087891	0.191169	0.032232	0.242018	0.432726
0,76333333	0.081284	0.040199	-0.03561	0.293648	0.271227	0.193256	0.544348	0.154448	0.329768	1.13331	0.322749	0.737584	0.013576	0.090434	0.188324	0.03202	0.23307	0.449053
0,76666667	0.081018	0.038089	-0.03863	0.298555	0.280799	0.198476	0.551776	0.158794	0.339775	1.14412	0.329918	0.750209	0.01384	0.094516	0.190812	0.032216	0.233212	0.440033
0,77	0.083554	0.039456	-0.03738	0.303961	0.287142	0.200138	0.557847	0.161921	0.342507	1.15442	0.331559	0.759233	0.013682	0.099242	0.19105	0.031143	0.242133	0.435978
0,77333333	0.082985	0.040229	-0.03465	0.310032	0.297163	0.204736	0.564899	0.163888	0.347521	1.16483	0.341069	0.769365	0.01336	0.100629	0.190913	0.032296	0.236323	0.452349
0,77666667	0.083385	0.039412	-0.03141	0.317508	0.304763	0.209861	0.571658	0.167332	0.350363	1.17649	0.343247	0.782471	0.012288	0.099354	0.190536	0.03308	0.23151	0.443744
0,78	0.081918	0.043771	-0.03422	0.324911	0.313477	0.213621	0.577672	0.16636	0.354622	1.18769	0.348293	0.79414	0.009026	0.096025	0.19085	0.033467	0.240125	0.440013
0,78333333	0.083617	0.043893	-0.03378	0.332173	0.316848	0.218449	0.583639	0.172878	0.365404	1.20348	0.354469	0.801013	0.00728	0.093022	0.189389	0.034982	0.242735	0.457198
0,78666667	0.083131	0.038391	-0.03179	0.339593	0.330407	0.226411	0.590578	0.176003	0.36482	1.21475	0.360953	0.814507	0.009902	0.091457	0.188682	0.033835	0.23329	0.448135
0,79	0.083027	0.046065	-0.02967	0.346855	0.342843	0.228489	0.598049	0.17479	0.373034	1.22799	0.365807	0.82279	0.012707	0.089015	0.190237	0.033067	0.239688	0.444216
0,79333333	0.082967	0.047219	-0.03569	0.352695	0.349921	0.231072	0.605487	0.179002	0.377546	1.23793	0.372376	0.828147	0.011235	0.092251	0.191154	0.033046	0.245579	0.459188
0,79666667	0.084049	0.045082	-0.03048	0.358078	0.359522	0.237096	0.613871	0.183911	0.384987	1.24805	0.374756	0.839932	0.011627	0.096671	0.191399	0.035537	0.238048	0.449827
0,8	0.084568	0.046497	-0.02948	0.365149	0.365547	0.245408	0.621707	0.185001	0.390264	1.25887	0.374207	0.850995	0.012386	0.09841	0.192944	0.033044	0.235908	0.444017
0,80333333	0.084311	0.045498	-0.03005	0.372017	0.377756	0.24742	0.630532	0.190213	0.395609	1.27268	0.381089	0.863002	0.007693	0.102032	0.194774	0.036729	0.246475	0.460058
0,80666667	0.085151	0.051471	-0.02526	0.37795	0.385334	0.251723	0.636635	0.193166	0.400771	1.28081	0.390682	0.869897	0.005951	0.102895	0.194306	0.037784	0.242654	0.453458
0,81	0.084892	0.054038	-0.02776	0.385585	0.393303	0.257285	0.64397	0.191163	0.404075	1.29194	0.395289	0.884102	0.00851	0.097083	0.192588	0.038638	0.237658	0.449708
0,81333333	0.086781	0.049242	-0.02646	0.393356	0.405032	0.265311	0.650468	0.195742	0.40898	1.30156	0.399009	0.89241	0.007934	0.09581	0.190646	0.038243	0.245722	0.462314
0,81666667	0.087292	0.053745	-0.02107	0.400915	0.414097	0.26948	0.656418	0.200247	0.411586	1.31024	0.402909	0.896296	0.010311	0.093205	0.190354	0.040832	0.251096	0.454632
0,82	0.08661	0.054395	-0.02413	0.40954	0.423173	0.273521	0.662598	0.204289	0.420051	1.31797	0.407504	0.905587	0.011142	0.085619	0.189041	0.039742	0.242951	0.452066
0,82333333	0.086148	0.058452	-0.01983	0.416651	0.434324	0.278794	0.669153	0.203696	0.424886	1.32758	0.416731	0.916705	0.009428	0.085452	0.190203	0.039111	0.244237	0.461658
0,82666667	0.088304	0.058107	-0.01784	0.423969	0.44165	0.284381	0.673921	0.210579	0.428946	1.33637	0.417949	0.927585	0.008752	0.086668	0.192105	0.040134	0.251835	0.452567
0,83	0.087247	0.057951	-0.02471	0.431426	0.453326	0.289826	0.679285	0.211409	0.433743	1.34649	0.422908	0.934802	0.0122	0.08506	0.194573	0.04108	0.251727	0.456421
0,83333333	0.087569	0.058617	-0.02009	0.442452	0.463144	0.294201	0.687659	0.216688	0.439086	1.35661	0.43097	0.946026	0.008217	0.083882	0.19483	0.041947	0.245604	0.467215
0,83666667	0.089049	0.059654	-0.01625	0.449697	0.476992	0.297106	0.694627	0.216964	0.446513	1.36612	0.431659	0.960077	0.009826	0.084956	0.194533	0.043646	0.24936	0.457393
0,84	0.088323	0.066961	-0.01888	0.457952	0.484954	0.303213	0.701461	0.219449	0.45703	1.37794	0.437971	0.96017	0.007753	0.080606	0.194166	0.045145	0.256427	0.461376
0,84333333	0.087395	0.062524	-0.01811	0.466366	0.500318	0.315935	0.709475	0.220677	0.459215	1.38814	0.446785	0.978688	0.004687	0.078716	0.19203	0.045831	0.252069	0.468531
0,84666667	0.086666	0.064607	-0.01457	0.475916	0.510371	0.318205	0.716837	0.231451	0.462838	1.39734	0.446815	0.983228	0.003298	0.078795	0.194326	0.046374	0.245968	0.457221
0,85	0.087966	0.062518	-0.01301	0.484246	0.519316	0.328229	0.723309	0.230423	0.467948	1.40822	0.453803	0.989645	0.004648	0.082288	0.196399	0.046471	0.251453	0.463059
0,85333333	0.087343	0.065988	-0.01374	0.492593	0.529563	0.329441	0.730326	0.230605	0.472588	1.41785	0.458208	1.00074	0.00505	0.082479	0.198479	0.044418	0.25627	0.468479
0,85666667	0.09003	0.065484	-0.01754	0.501732	0.540948	0.332058	0.73658	0.235877	0.475332	1.42445	0.464307	1.00545	0.008286	0.088379	0.200003	0.044575	0.251754	0.458654
0,86	0.0915	0.06976	-0.01088	0.509859	0.551102	0.342966	0.743567	0.239179	0.481229	1.43304	0.465069	1.01494	0.011094	0.091402	0.200574	0.043071	0.250167	0.468864
0,86333333	0.093822	0.071717	-0.01283	0.518055	0.562016	0.349933	0.748221	0.241101	0.486995	1.44104	0.471545	1.02924	0.008965	0.092591	0.199184	0.044036	0.254267	0.469517
0,86666667	0.094116	0.07229	-0.01034	0.527773	0.573266	0.353458	0.754487	0.249572	0.489228	1.44927	0.4754	1.0304	0.010607	0.093573	0.19811	0.044151	0.256974	0.457735
0,87	0.096934	0.073853	-0.00815	0.537364	0.582529	0.355083	0.759739	0.240375	0.497328	1.45746	0.479521	1.03944	0.00971	0.098876	0.196262	0.044752	0.256142	0.470433
0,87333333	0.098068	0.078274	-0.00944	0.546857	0.594073	0.367471	0.765928	0.251324	0.503466	1.46598	0.486951	1.04783	0.009529	0.097665	0.19339	0.04596	0.253745	0.469354
0,87666667	0.100097	0.0761	-0.00752	0.557081	0.608889	0.373762	0.771235	0.253229	0.506755	1.47153	0.489595	1.05823	0.008664	0.095739	0.194189	0.047981	0.255268	0.458688
0,88	0.100363	0.075706	-0.00409	0.566228	0.621142	0.379161	0.77925	0.256696	0.515646	1.48066	0.492333	1.06448	0.007944	0.094439	0.19308	0.047018	0.257633	0.472517
0,88333333	0.10176	0.079267	-0.00437	0.574981	0.630992	0.385484	0.786272	0.255774	0.517911	1.48857	0.498254	1.07056	0.004107	0.092515	0.190694	0.048381	0.258482	0.472249
0,88666667	0.103737	0.080817	-0.00719	0.585105	0.647421	0.39583	0.793342	0.262151	0.521123	1.49191	0.507924	1.07687	0.003441	0.088053	0.190177	0.05114	0.260008	0.461363
0,89	0.104593	0.083998	-0.00144	0.594103	0.659554	0.396675	0.799653	0.260322	0.529651	1.49635	0.504496	1.09303	0.003467	0.08915	0.192908	0.051259	0.261209	0.476001
0,89333333	0.104604	0.083257	-0.0013	0.604037	0.670169	0.408082	0.805337	0.266685	0.533937	1.50242	0.509666	1.09711	0.003846	0.09178	0.194507	0.051181	0.260112	0.472677
0,89666667	0.10524	0.085856	0.003321	0.614993	0.683358	0.419739	0.810609	0.271582	0.540877	1.50683	0.515908	1.09994	0.004963	0.093446	0.195865	0.053928	0.258351	0.46696
0,9	0.105096	0.088398	0.00012	0.626252	0.693618	0.423703	0.817758	0.269533	0.53838	1.51233	0.521533	1.11091	0.004516	0.094138	0.198701	0.053324	0.257102	0.479911
0,90333333	0.104231	0.091434	-0.00215	0.636149	0.710758	0.430651	0.823356	0.274991	0.549125	1.51829	0.521707	1.11783	0.004465	0.094908	0.200982	0.052464	0.257373	0.47458
0,90666667	0.104069	0.090995	0.004835	0.64667	0.719922	0.433894	0.830048	0.27792	0.555509	1.52589	0.52989	1.12721	0.001376	0.094549	0.200736	0.053286	0.258422	0.471003
0,91	0.104158	0.093173	0.002634	0.656061	0.734594	0.44377	0.835903	0.277512	0.558505	1.53303	0.534288	1.13217	0.000284	0.094784	0.198694	0.053601	0.257662	0.480538
0,91333333	0.105187	0.092395	0.005355	0.666825	0.74782	0.451201	0.842272	0.286953	0.566506	1.53968	0.540358	1.14018	-0.00064	0.094101	0.199076	0.054732	0.257942	0.473015
0,91666667	0.107296	0.096871	0.007318	0.679446	0.759321	0.458644	0.848803	0.285109	0.566522	1.54868	0.539141	1.14557	-0.0007	0.094687	0.19651	0.055432	0.257645	0.473384
0,92	0.107264	0.094174	0.008108	0.690895	0.769354	0.464639	0.85382	0.293451	0.573891	1.55648	0.548531	1.15306	0.000286	0.09507	0.196193	0.058545	0.258124	0.479833
0,92333333	0.108457	0.100787	0.008392	0.702685	0.785631	0.47895	0.859785	0.293374	0.574855	1.56416	0.552762	1.15788	0.002986	0.096317	0.195633	0.060858	0.26078	0.472754
0,92666667	0.108608	0.09963	0.007587	0.713594	0.799814	0.479663	0.866281	0.295668	0.58111	1.57157	0.551156	1.16329	0.004645	0.095306	0.19641	0.06159	0.261779	0.478136
0,93	0.109654	0.094612	0.009054	0.724197	0.807631	0.489452	0.873575	0.302021	0.58574	1.5766	0.555614	1.17434	0.005536	0.09245	0.195741	0.061289	0.260265	0.478674
0,93333333	0.10852	0.100599	0.012204	0.736799	0.824707	0.49839	0.879951	0.296433	0.594181	1.57923	0.560655	1.17704	0.008113	0.092897	0.196357	0.063436	0.257629	0.473183
0,93666667	0.109266	0.106571	0.015388	0.749417	0.837862	0.504515	0.887754	0.304099	0.597197	1.58632	0.564099	1.18192	0.006481	0.091711	0.195726	0.062538	0.257319	0.482147
0,94	0.109064	0.105908	0.017969	0.761606	0.85242	0.510587	0.894659	0.308604	0.602956	1.59218	0.57438	1.19249	0.00781	0.088936	0.196082	0.061109	0.260821	0.479591
0,94333333	0.110695	0.107292	0.014289	0.7742	0.866567	0.521371	0.900774	0.305519	0.606917	1.59544	0.571319	1.19706	0.006062	0.090599	0.198083	0.063711	0.266979	0.476022
0,94666667	0.111846	0.1111	0.017297	0.786293	0.874807	0.530972	0.905341	0.31086	0.607849	1.60027	0.579615	1.20579	0.006163	0.091978	0.19772	0.06233	0.266443	0.483376
0,95	0.115948	0.10975	0.018341	0.798098	0.892891	0.541345	0.910994	0.314881	0.614991	1.60372	0.584322	1.20939	0.000768	0.091773	0.197324	0.0622	0.264219	0.477183
0,95333333	0.115663	0.111603	0.01861	0.808648	0.910651	0.541716	0.916985	0.316992	0.620223	1.60735	0.587595	1.21845	0.001146	0.095195	0.197151	0.062006	0.260631	0.479988
0,95666667	0.11815	0.113991	0.025441	0.820883	0.916616	0.550694	0.921004	0.321753	0.624453	1.6084	0.593099	1.22119	-0.00104	0.094852	0.196276	0.06394	0.257527	0.482988
0,96	0.120196	0.115742	0.029126	0.833844	0.938094	0.565121	0.927477	0.320609	0.625909	1.61434	0.595472	1.22869	0.000557	0.095123	0.194795	0.063321	0.259234	0.476478
0,96333333	0.121049	0.121974	0.027161	0.847335	0.9503	0.570021	0.935162	0.326458	0.633613	1.61915	0.600045	1.23659	-0.00019	0.097081	0.195696	0.063906	0.268249	0.482789
0,96666667	0.119928	0.117789	0.029051	0.860641	0.963633	0.577929	0.943807	0.327937	0.636288	1.62584	0.606182	1.24277	0.004042	0.096585	0.197809	0.064808	0.27368	0.483374
0,97	0.12329	0.123419	0.028984	0.871958	0.981761	0.586428	0.950028	0.332002	0.643833	1.63007	0.60765	1.24166	0.003842	0.092853	0.198716	0.065468	0.273591	0.476107
0,97333333	0.124683	0.123416	0.028004	0.884395	0.999485	0.591791	0.957245	0.333619	0.648991	1.63628	0.609541	1.24962	0.004807	0.095126	0.199103	0.064833	0.269711	0.486273
0,97666667	0.126006	0.12324	0.033008	0.896487	1.01338	0.604488	0.962612	0.337922	0.648838	1.63992	0.615965	1.25972	0.003618	0.094756	0.198464	0.065428	0.263258	0.482849
0,98	0.12689	0.128037	0.032396	0.908115	1.02265	0.613733	0.967377	0.336877	0.656489	1.64533	0.617569	1.2631	0.00482	0.095613	0.197455	0.066933	0.259615	0.481603
0,98333333	0.128904	0.128587	0.032428	0.922506	1.0385	0.618783	0.974876	0.343091	0.662183	1.6524	0.623504	1.26582	0.003158	0.096925	0.196931	0.067967	0.260587	0.489707
0,98666667	0.129083	0.134053	0.037164	0.936865	1.05317	0.635472	0.97988	0.341851	0.668612	1.65506	0.624734	1.2734	0.004855	0.099017	0.197063	0.069198	0.266797	0.482311
0,99	0.129234	0.12892	0.034715	0.94962	1.06639	0.640652	0.984988	0.34409	0.668355	1.65837	0.630234	1.28164	0.003302	0.099484	0.195759	0.068872	0.272955	0.486683
0,99333333	0.129215	0.133117	0.031511	0.963585	1.0825	0.651399	0.991914	0.352152	0.675594	1.66257	0.63375	1.28557	0.004052	0.101724	0.19455	0.068903	0.276363	0.489113
0,99666667	0.13015	0.134491	0.037949	0.97788	1.09341	0.659008	0.998593	0.354358	0.67964	1.66516	0.636541	1.29116	0.001412	0.103351	0.195115	0.068793	0.271195	0.484062
1	0.130419	0.142498	0.037954	0.99362	1.11817	0.668168	1.00313	0.35712	0.684031	1.66809	0.644167	1.29404	0.001722	0.106927	0.194148	0.06889	0.266448	0.48812
1,00333333	0.133304	0.14184	0.041038	1.00791	1.12841	0.67763	1.0077	0.35678	0.691446	1.67166	0.640799	1.29819	0.001125	0.111323	0.193994	0.067899	0.261235	0.487026
1,00666667	0.134938	0.151068	0.042621	1.02302	1.1395	0.684262	1.01436	0.361435	0.695117	1.67355	0.646985	1.30238	0.002607	0.108292	0.193895	0.069436	0.260337	0.484147
1,01	0.137166	0.146091	0.045343	1.03788	1.16114	0.696952	1.01856	0.360737	0.69624	1.67616	0.650524	1.30479	0.001217	0.104735	0.194182	0.070151	0.264041	0.488351
1,01333333	0.13837	0.149659	0.049697	1.05018	1.17429	0.70331	1.02342	0.366004	0.70108	1.68047	0.649791	1.30961	0.003375	0.103653	0.19511	0.070392	0.272147	0.484555
1,01666667	0.140563	0.147079	0.045645	1.06487	1.19215	0.717303	1.029	0.367965	0.706778	1.68404	0.656261	1.31324	0.003111	0.101077	0.195637	0.071354	0.277829	0.488931
1,02	0.139159	0.151923	0.047872	1.07836	1.20752	0.72636	1.03543	0.366333	0.71416	1.68455	0.660225	1.32063	0.003279	0.099441	0.196551	0.070229	0.276916	0.490018
1,02333333	0.137633	0.154074	0.049456	1.09407	1.22275	0.734973	1.03863	0.373426	0.716484	1.68851	0.662649	1.32228	0.002124	0.105897	0.19931	0.071431	0.272837	0.486761
1,02666667	0.137883	0.155194	0.053726	1.10878	1.23975	0.747943	1.04394	0.376116	0.722377	1.6918	0.66979	1.32831	0.002449	0.108928	0.200071	0.071341	0.267548	0.489625
1,03	0.139831	0.156983	0.051409	1.12512	1.25117	0.757276	1.04758	0.373618	0.725693	1.69484	0.673389	1.32813	-0.00084	0.109973	0.197329	0.072211	0.265433	0.488091
1,03333333	0.13953	0.159834	0.05159	1.14141	1.2743	0.761788	1.05214	0.381564	0.728596	1.6967	0.674901	1.33547	0.001673	0.112621	0.196788	0.072889	0.265737	0.485414
1,03666667	0.142619	0.163077	0.054662	1.1577	1.28467	0.775215	1.05677	0.38698	0.734056	1.70352	0.676814	1.34116	0.002548	0.112662	0.196148	0.075946	0.271726	0.488151
1,04	0.145292	0.166762	0.058816	1.17059	1.29788	0.785048	1.06225	0.385601	0.739796	1.70636	0.682069	1.34747	0.001434	0.111509	0.195217	0.074523	0.278304	0.486049
1,04333333	0.146347	0.162724	0.056765	1.18469	1.3172	0.795827	1.06657	0.390375	0.738366	1.70892	0.684193	1.34927	-0.00115	0.108795	0.196335	0.075314	0.280391	0.489511
1,04666667	0.146408	0.168588	0.064099	1.19907	1.33723	0.807657	1.07234	0.392164	0.745915	1.7112	0.685683	1.34876	-0.00073	0.109507	0.197636	0.076382	0.276807	0.487632
1,05	0.148755	0.170751	0.059663	1.21651	1.35475	0.816763	1.08015	0.394727	0.748347	1.71321	0.68776	1.35356	-0.00035	0.106935	0.19897	0.076085	0.272099	0.489647
1,05333333	0.148977	0.174255	0.064221	1.2311	1.37114	0.826856	1.08489	0.400151	0.753071	1.71429	0.692639	1.36022	-0.00412	0.107164	0.197928	0.07612	0.267723	0.48994
1,05666667	0.149823	0.173765	0.067858	1.24779	1.38177	0.836606	1.0905	0.400068	0.761587	1.71798	0.696223	1.36953	-0.0028	0.105217	0.197864	0.078432	0.266137	0.489133
1,06	0.149974	0.175666	0.065978	1.26332	1.40027	0.847625	1.09706	0.401674	0.762261	1.72041	0.699547	1.36716	-0.00169	0.109386	0.196569	0.078842	0.269732	0.491041
1,06333333	0.151597	0.180334	0.067976	1.27872	1.41272	0.858983	1.10364	0.403149	0.768066	1.72209	0.702424	1.36701	-0.00047	0.109103	0.197109	0.079825	0.27716	0.491468
1,06666667	0.1515	0.180423	0.069474	1.29385	1.43465	0.867135	1.10817	0.402968	0.772	1.72306	0.704951	1.37442	-0.00233	0.109721	0.1951	0.079457	0.282976	0.489926
1,07	0.153159	0.183196	0.075973	1.31001	1.44831	0.879872	1.11443	0.407952	0.773743	1.7253	0.708159	1.37732	0.001936	0.109854	0.195383	0.07979	0.283969	0.489795
1,07333333	0.156167	0.188986	0.074434	1.32427	1.4604	0.894621	1.12059	0.416278	0.780254	1.72492	0.708344	1.38532	0.003426	0.115206	0.195201	0.081769	0.279344	0.491665
1,07666667	0.158928	0.189222	0.074175	1.34112	1.48208	0.901703	1.12618	0.415407	0.785246	1.72693	0.708292	1.3843	0.005099	0.11339	0.195672	0.082388	0.273792	0.490446
1,08	0.160228	0.197062	0.077028	1.35761	1.49991	0.913368	1.13083	0.416682	0.78955	1.72859	0.718567	1.38874	0.005665	0.117123	0.194951	0.082355	0.268346	0.492393
1,08333333	0.163379	0.192399	0.08077	1.37539	1.52017	0.921932	1.13603	0.421682	0.787239	1.73129	0.719626	1.39283	0.007213	0.11553	0.198069	0.084011	0.265257	0.492695
1,08666667	0.163837	0.197086	0.078583	1.39152	1.5311	0.932465	1.13928	0.421157	0.796958	1.73396	0.723012	1.39447	0.003531	0.114167	0.195428	0.085723	0.26919	0.490573
1,09	0.165105	0.195898	0.081099	1.40851	1.55112	0.945553	1.14331	0.428405	0.800923	1.73729	0.723153	1.39876	0.002015	0.111803	0.19456	0.084199	0.277406	0.492455
1,09333333	0.166161	0.200788	0.084359	1.42338	1.56848	0.956076	1.14666	0.43058	0.803694	1.7374	0.726335	1.40192	0.000919	0.114031	0.196788	0.084871	0.28338	0.489853
1,09666667	0.168081	0.198218	0.084443	1.43939	1.58397	0.964615	1.14978	0.433335	0.80805	1.73911	0.726583	1.40559	0.000841	0.110551	0.197548	0.08588	0.283479	0.490311
1,1	0.169314	0.20596	0.084424	1.45777	1.60418	0.975865	1.15424	0.436275	0.811482	1.74249	0.731843	1.40736	-0.00212	0.112224	0.194326	0.085217	0.281013	0.494124
1,10333333	0.171905	0.207998	0.087468	1.4728	1.62088	0.987166	1.15943	0.432424	0.815068	1.74352	0.734722	1.41156	-0.00117	0.115256	0.196817	0.084817	0.274134	0.494479
1,10666667	0.173041	0.205174	0.09452	1.48908	1.63449	1.00373	1.16274	0.434996	0.818532	1.74656	0.739506	1.41289	-0.00329	0.112513	0.197994	0.08429	0.270075	0.49446
1,11	0.17388	0.214454	0.095705	1.50649	1.65043	1.01125	1.16798	0.43926	0.826325	1.74889	0.740586	1.41254	-0.00394	0.112939	0.197017	0.083997	0.268928	0.492032
1,11333333	0.174616	0.214384	0.094354	1.52391	1.67667	1.02213	1.17314	0.439918	0.825713	1.75226	0.744327	1.42095	-0.00504	0.110867	0.195427	0.0841	0.274246	0.493804
1,11666667	0.176382	0.214923	0.095006	1.54178	1.69026	1.03892	1.17796	0.446367	0.825173	1.75321	0.745033	1.41968	-0.0065	0.115556	0.199303	0.085288	0.281598	0.49297
1,12	0.178417	0.21978	0.103428	1.56006	1.70905	1.04496	1.18378	0.446232	0.8361	1.75429	0.746787	1.42542	-0.00851	0.113045	0.198734	0.086548	0.285871	0.493365
1,12333333	0.180251	0.220719	0.105452	1.57662	1.72622	1.05879	1.18824	0.446541	0.835469	1.75357	0.750725	1.43105	-0.0092	0.1148	0.198225	0.089024	0.283908	0.496646
1,12666667	0.181254	0.227056	0.101944	1.59469	1.74439	1.06932	1.1935	0.44991	0.840818	1.75665	0.754535	1.42925	-0.01141	0.110767	0.196983	0.089276	0.278825	0.49938
1,13	0.184655	0.227941	0.102834	1.61132	1.76249	1.07666	1.19972	0.454528	0.844618	1.75455	0.753432	1.43033	-0.01147	0.114813	0.197471	0.089638	0.273046	0.500616
1,13333333	0.185523	0.225935	0.107651	1.63046	1.77555	1.09448	1.20537	0.45701	0.84577	1.7558	0.757159	1.43196	-0.00985	0.109858	0.195633	0.089317	0.268482	0.501336
1,13666667	0.186798	0.22836	0.102673	1.64697	1.79325	1.10264	1.20966	0.460211	0.854808	1.76062	0.763636	1.43648	-0.00589	0.113612	0.194756	0.088334	0.269916	0.500513
1,14	0.185314	0.231775	0.106063	1.66506	1.81056	1.11866	1.21715	0.46407	0.857602	1.76238	0.758549	1.43543	-0.00285	0.113479	0.19166	0.087395	0.27453	0.500954
1,14333333	0.186675	0.234378	0.111357	1.6825	1.83127	1.1351	1.22278	0.462178	0.860979	1.76314	0.76624	1.44118	0.001236	0.115535	0.192066	0.089818	0.281234	0.498549
1,14666667	0.185599	0.24001	0.112467	1.70056	1.84707	1.14377	1.22658	0.465706	0.864261	1.76664	0.770787	1.43863	0.001742	0.114236	0.19549	0.091054	0.286002	0.501927
1,15	0.189842	0.238019	0.117008	1.71952	1.86696	1.15166	1.23113	0.467068	0.865187	1.76854	0.770296	1.44282	0.005089	0.11266	0.195765	0.090857	0.285999	0.500241
1,15333333	0.191318	0.241898	0.115658	1.73776	1.88488	1.16645	1.23527	0.471386	0.867264	1.76784	0.772462	1.44934	0.004675	0.107713	0.195786	0.092864	0.281637	0.499651
1,15666667	0.195157	0.242441	0.118239	1.75466	1.90317	1.17657	1.23817	0.472531	0.873237	1.77177	0.772198	1.44781	0.004644	0.107185	0.196863	0.09501	0.278569	0.502132
1,16	0.19753	0.247028	0.122032	1.7725	1.91985	1.19242	1.24095	0.475252	0.879205	1.77233	0.772483	1.45227	0.003154	0.108066	0.196129	0.094096	0.278169	0.50046
1,16333333	0.200197	0.252541	0.123268	1.78905	1.93619	1.20382	1.24542	0.475121	0.87864	1.7717	0.776811	1.4516	0.003811	0.111644	0.191876	0.092931	0.279541	0.498774
1,16666667	0.199824	0.255289	0.126607	1.80791	1.95141	1.21921	1.24961	0.483632	0.88191	1.77729	0.77906	1.4521	0.005151	0.116225	0.191329	0.094972	0.28187	0.498606
1,17	0.201302	0.253261	0.128902	1.82666	1.97659	1.2256	1.2531	0.483726	0.888949	1.77536	0.78563	1.45856	0.005917	0.11992	0.193274	0.094255	0.282221	0.500488
1,17333333	0.202487	0.254501	0.130147	1.84602	1.9891	1.24194	1.2588	0.484031	0.891298	1.77644	0.782837	1.46143	0.004783	0.120934	0.194823	0.092237	0.282027	0.500282
1,17666667	0.203478	0.256399	0.135556	1.86355	2.00927	1.25655	1.26198	0.486108	0.89483	1.77981	0.784065	1.4616	0.006854	0.122442	0.193713	0.092662	0.282504	0.498878
1,18	0.205129	0.265717	0.134651	1.88354	2.03491	1.27008	1.2653	0.490742	0.902998	1.78096	0.790167	1.46293	0.007023	0.117696	0.19521	0.093073	0.283547	0.504537
1,18333333	0.207766	0.263096	0.132498	1.90519	2.04825	1.27625	1.27075	0.492334	0.905	1.77969	0.788162	1.46231	0.005623	0.112794	0.195179	0.093091	0.282414	0.500742
1,18666667	0.208465	0.266429	0.136521	1.92393	2.07027	1.29283	1.27496	0.491194	0.905761	1.78491	0.79113	1.46609	0.003007	0.121235	0.193177	0.093353	0.283543	0.502297
1,19	0.209771	0.272271	0.138595	1.94232	2.08598	1.30989	1.27639	0.499306	0.907557	1.7843	0.798125	1.46967	0.004179	0.118792	0.193275	0.093361	0.28776	0.503843
1,19333333	0.210406	0.271178	0.142817	1.96075	2.10277	1.32351	1.2807	0.499427	0.910444	1.78487	0.799046	1.46874	0.001195	0.112858	0.193356	0.094223	0.288348	0.502066
1,19666667	0.212366	0.271783	0.142527	1.97942	2.11689	1.33816	1.28496	0.502828	0.911488	1.78724	0.798302	1.47345	0.00067	0.117378	0.194152	0.093155	0.281338	0.503424
1,2	0.214586	0.281994	0.143765	1.99796	2.13691	1.34589	1.28806	0.503804	0.918419	1.78695	0.805713	1.47489	0.000249	0.12289	0.194062	0.093795	0.281104	0.502059
1,20333333	0.217961	0.284119	0.145908	2.01534	2.15921	1.35424	1.29117	0.50544	0.920239	1.78824	0.802465	1.47709	0.001946	0.116529	0.196439	0.09409	0.287142	0.50571
1,20666667	0.221203	0.285597	0.148824	2.03497	2.17637	1.36539	1.29561	0.506194	0.925907	1.78909	0.805824	1.47431	-0.00124	0.119094	0.196487	0.09664	0.28389	0.504238
1,21	0.224047	0.285094	0.149564	2.05446	2.19719	1.38846	1.30003	0.51091	0.92296	1.78817	0.807784	1.47699	6.31e-05	0.123387	0.197257	0.097182	0.278775	0.503575
1,21333333	0.225541	0.290317	0.156497	2.07323	2.21747	1.3955	1.30372	0.511712	0.931642	1.79094	0.811555	1.47996	0.001008	0.123491	0.193547	0.097586	0.284445	0.504139
1,21666667	0.226151	0.292672	0.156797	2.09345	2.23442	1.4124	1.3093	0.51277	0.93187	1.79166	0.811583	1.47956	0.000333	0.121792	0.19307	0.096331	0.285682	0.498333
1,22	0.226431	0.301313	0.159446	2.11337	2.25385	1.42388	1.31263	0.520066	0.933118	1.79169	0.816855	1.48321	-0.00197	0.120134	0.191379	0.096826	0.279387	0.502004
1,22333333	0.226528	0.295809	0.163638	2.13117	2.26919	1.43676	1.31603	0.520078	0.939409	1.79313	0.812735	1.48575	-0.00092	0.120547	0.19225	0.099014	0.282773	0.498617
1,22666667	0.229634	0.303562	0.164804	2.14942	2.29651	1.45045	1.31908	0.522775	0.936575	1.79456	0.81515	1.4806	-0.00197	0.121292	0.190959	0.098417	0.28663	0.501075
1,23	0.230124	0.311236	0.165284	2.16973	2.30382	1.4659	1.32163	0.520549	0.943947	1.79426	0.820659	1.48393	-0.00246	0.120267	0.193779	0.10137	0.281971	0.503543
1,23333333	0.232973	0.306694	0.165398	2.19159	2.3248	1.48003	1.32504	0.52691	0.94996	1.79494	0.820207	1.48755	-0.00504	0.119798	0.194901	0.103071	0.28436	0.503023
1,23666667	0.234716	0.308558	0.170304	2.21089	2.34569	1.49329	1.32961	0.527757	0.952789	1.79507	0.823714	1.48932	-0.00265	0.119847	0.196564	0.101719	0.288524	0.504964
1,24	0.236587	0.315266	0.168291	2.22964	2.36544	1.50153	1.33522	0.528969	0.954481	1.79564	0.825618	1.48536	-0.00279	0.117405	0.19567	0.099111	0.282962	0.500156
1,24333333	0.23835	0.315923	0.172154	2.25092	2.38479	1.5209	1.33992	0.534061	0.9579	1.79579	0.827963	1.49046	-0.00234	0.117231	0.200256	0.100649	0.285181	0.503789
1,24666667	0.24059	0.319396	0.17714	2.26864	2.40006	1.53389	1.34603	0.535756	0.959181	1.79622	0.82587	1.49622	-0.00329	0.116678	0.199011	0.100023	0.289242	0.503496
1,25	0.24118	0.320269	0.178093	2.28963	2.41849	1.54514	1.34986	0.53221	0.961136	1.7962	0.82654	1.49301	-0.00451	0.115559	0.198313	0.100012	0.282794	0.503784
1,25333333	0.244781	0.326297	0.178273	2.30979	2.43702	1.55965	1.35476	0.537012	0.965761	1.79852	0.83723	1.49599	-0.00517	0.11727	0.195349	0.10166	0.284524	0.50613
1,25666667	0.248326	0.326007	0.183876	2.33152	2.4602	1.56928	1.35794	0.540072	0.970264	1.79842	0.829036	1.4959	-0.00386	0.120566	0.19215	0.10076	0.290153	0.502569
1,26	0.249911	0.328197	0.185845	2.3501	2.47467	1.58918	1.36135	0.540521	0.974289	1.79879	0.833692	1.4954	-0.0045	0.122559	0.189231	0.09878	0.283225	0.506683
1,26333333	0.253559	0.33206	0.194461	2.37036	2.49918	1.60242	1.36309	0.544897	0.970484	1.79924	0.835311	1.49717	-0.00586	0.123339	0.18853	0.098989	0.283864	0.500576
1,26666667	0.256045	0.336384	0.193269	2.38986	2.51561	1.61558	1.36647	0.543536	0.976044	1.80046	0.836887	1.499	-0.00452	0.128037	0.188919	0.099771	0.290065	0.501414
1,27	0.25758	0.336805	0.192689	2.40875	2.53672	1.62692	1.37015	0.552179	0.975369	1.8001	0.840693	1.49684	-0.00533	0.128968	0.191844	0.100704	0.282904	0.505024
1,27333333	0.258493	0.338981	0.196179	2.42713	2.5544	1.64239	1.37314	0.54692	0.979253	1.80149	0.844004	1.50185	-0.00582	0.128993	0.193898	0.102209	0.282764	0.501658
1,27666667	0.259366	0.344209	0.195072	2.44787	2.58019	1.65911	1.37602	0.55332	0.987024	1.80213	0.844002	1.49921	-0.00594	0.125728	0.195635	0.104488	0.288047	0.506449
1,28	0.259021	0.344864	0.199136	2.4666	2.59209	1.67326	1.38031	0.552311	0.986344	1.80185	0.84215	1.50681	-0.0055	0.127399	0.197818	0.103937	0.282911	0.500222
1,28333333	0.261075	0.352974	0.202843	2.48754	2.61304	1.6885	1.38343	0.554363	0.99017	1.80199	0.844537	1.50487	-0.0033	0.12674	0.197593	0.10245	0.28037	0.50821
1,28666667	0.263027	0.356955	0.206421	2.50665	2.63556	1.69938	1.38601	0.558852	0.99182	1.80155	0.844992	1.50699	-0.00239	0.124667	0.197663	0.101313	0.287377	0.497812
1,29	0.266602	0.353922	0.210381	2.52724	2.64928	1.71887	1.38901	0.56098	0.994631	1.8015	0.844732	1.50472	-0.00272	0.12345	0.199635	0.103037	0.281699	0.506584
1,29333333	0.269244	0.36221	0.208229	2.54489	2.67053	1.72729	1.39168	0.562653	0.996613	1.80172	0.84796	1.50598	-0.00453	0.126491	0.198236	0.101944	0.280694	0.505981
1,29666667	0.272353	0.364345	0.214092	2.56505	2.69218	1.74074	1.39275	0.566077	1.00468	1.80162	0.853612	1.50708	-0.00609	0.127162	0.195855	0.1022	0.287188	0.507652
1,3	0.274492	0.365786	0.216127	2.58558	2.70837	1.75671	1.39615	0.565791	1.00408	1.80308	0.850414	1.50813	-0.00952	0.127094	0.194662	0.104541	0.285935	0.51365
1,30333333	0.277433	0.36556	0.217552	2.60925	2.73329	1.77344	1.39989	0.566249	1.00686	1.80303	0.854877	1.51151	-0.01529	0.128858	0.193291	0.106843	0.282197	0.507854
1,30666667	0.278667	0.368652	0.218548	2.62765	2.74682	1.78709	1.40186	0.569083	1.00749	1.80232	0.858374	1.51431	-0.01682	0.130909	0.192262	0.105749	0.290616	0.51402
1,31	0.283267	0.375697	0.222209	2.64881	2.76835	1.80003	1.40542	0.570597	1.00883	1.80232	0.859124	1.51412	-0.01545	0.12757	0.192856	0.105863	0.290123	0.504863
1,31333333	0.285328	0.376363	0.223775	2.67011	2.78977	1.81855	1.40983	0.569171	1.01659	1.80374	0.857985	1.51087	-0.01514	0.127083	0.196454	0.10776	0.283306	0.510686
1,31666667	0.287228	0.380559	0.224865	2.69323	2.80862	1.82997	1.41287	0.578034	1.01443	1.80353	0.86006	1.50918	-0.01399	0.126893	0.197588	0.106837	0.288856	0.502971
1,32	0.287896	0.382243	0.225134	2.71302	2.82411	1.84359	1.4155	0.576489	1.01845	1.80411	0.861766	1.5084	-0.01138	0.127137	0.198455	0.107407	0.292648	0.506542
1,32333333	0.289314	0.390809	0.235386	2.73363	2.84373	1.86065	1.4186	0.576707	1.01574	1.80746	0.863121	1.51358	-0.01049	0.124626	0.197496	0.106356	0.284614	0.50802
1,32666667	0.289042	0.389239	0.231074	2.75377	2.86311	1.86966	1.42176	0.577391	1.01963	1.80881	0.863158	1.51968	-0.00805	0.130384	0.196999	0.106773	0.287086	0.503485
1,33	0.291314	0.388209	0.235183	2.77401	2.88285	1.88518	1.42383	0.58225	1.0234	1.80937	0.86618	1.51776	-0.00497	0.129299	0.195638	0.106637	0.292747	0.508194
1,33333333	0.294226	0.396517	0.23341	2.79419	2.9007	1.90469	1.42691	0.587038	1.02808	1.81023	0.866728	1.51438	-0.00458	0.129565	0.195099	0.109068	0.286625	0.503777
1,33666667	0.297019	0.399896	0.242876	2.81355	2.92321	1.91869	1.42922	0.589938	1.03138	1.81034	0.862359	1.50774	-0.00597	0.129363	0.19399	0.107671	0.283252	0.506811
1,34	0.298846	0.404039	0.238316	2.83413	2.93643	1.93583	1.43183	0.586756	1.02906	1.80852	0.867419	1.51832	-0.00712	0.133185	0.193763	0.111168	0.291497	0.502269
1,34333333	0.299727	0.405652	0.246708	2.8543	2.9587	1.94791	1.43369	0.585645	1.03363	1.80816	0.872975	1.51579	-0.00817	0.128711	0.194646	0.112518	0.288754	0.505612
1,34666667	0.301976	0.413808	0.251154	2.8743	2.97603	1.95979	1.43792	0.587804	1.03547	1.80783	0.872391	1.51768	-0.00832	0.122947	0.194453	0.111822	0.285968	0.507776
1,35	0.304544	0.41119	0.25069	2.89733	3.00111	1.97493	1.4405	0.59406	1.03766	1.80956	0.87721	1.52279	-0.00983	0.120441	0.195345	0.111481	0.29266	0.504142
1,35333333	0.30806	0.419308	0.250493	2.9178	3.01465	1.99316	1.44302	0.593259	1.04219	1.81014	0.870857	1.5214	-0.00613	0.114669	0.197263	0.112683	0.295473	0.511955
1,35666667	0.309973	0.418416	0.25546	2.93892	3.0346	2.00874	1.44483	0.593805	1.04253	1.81123	0.878873	1.51575	-0.00301	0.110807	0.198776	0.109531	0.287371	0.504732
1,36	0.314508	0.422765	0.256295	2.95875	3.05553	2.02422	1.4485	0.598775	1.04487	1.81205	0.875581	1.5253	-0.00302	0.111363	0.197947	0.109913	0.289783	0.508205
1,36333333	0.316621	0.429847	0.260478	2.97982	3.07195	2.03733	1.44956	0.598525	1.04345	1.81259	0.877629	1.52292	-0.00592	0.115903	0.194285	0.111143	0.294675	0.502258
1,36666667	0.318308	0.428968	0.258479	2.99914	3.08987	2.04731	1.45177	0.602526	1.05248	1.81299	0.876623	1.5245	-0.00762	0.116757	0.191489	0.10953	0.289972	0.502256
1,37	0.321973	0.434134	0.264716	3.021	3.11345	2.06226	1.45468	0.601559	1.05024	1.8138	0.879204	1.52211	-0.0068	0.120479	0.189953	0.107303	0.2869	0.502028
1,37333333	0.325389	0.433955	0.26403	3.04177	3.13683	2.08006	1.45783	0.602651	1.05393	1.81175	0.879943	1.5248	-0.00899	0.12416	0.190413	0.110159	0.292094	0.499527
1,37666667	0.327771	0.442181	0.270282	3.06236	3.1513	2.09746	1.45938	0.603932	1.05289	1.81289	0.886796	1.52272	-0.01059	0.123804	0.190035	0.109034	0.293856	0.505295
1,38	0.330769	0.442972	0.276645	3.08076	3.17012	2.11608	1.46167	0.608327	1.0583	1.81465	0.88475	1.52412	-0.01255	0.119991	0.19289	0.107208	0.287319	0.499239
1,38333333	0.335359	0.450151	0.275301	3.1023	3.18373	2.1297	1.4655	0.615022	1.0615	1.81551	0.883407	1.52512	-0.00837	0.11797	0.193247	0.109396	0.288212	0.50738
1,38666667	0.335841	0.444583	0.273768	3.12426	3.20735	2.14176	1.4699	0.609722	1.05882	1.81669	0.884025	1.52816	-0.01314	0.115553	0.192314	0.111264	0.293586	0.50361
1,39	0.339005	0.452829	0.278522	3.14402	3.22755	2.15672	1.473	0.614448	1.05973	1.81719	0.88637	1.52278	-0.01461	0.11673	0.191269	0.110468	0.293355	0.503639
1,39333333	0.342073	0.455445	0.284945	3.16409	3.2476	2.16946	1.4753	0.614546	1.06571	1.81794	0.888846	1.52876	-0.01622	0.11882	0.19232	0.110498	0.288136	0.504308
1,39666667	0.344297	0.458691	0.285188	3.18548	3.26173	2.19011	1.47965	0.616844	1.0661	1.81609	0.886	1.53329	-0.01527	0.124172	0.192485	0.111618	0.291991	0.500965
1,4	0.344977	0.46114	0.290948	3.20561	3.28164	2.20705	1.4822	0.618286	1.07551	1.8155	0.891468	1.52357	-0.01937	0.125546	0.197023	0.11118	0.296132	0.502538
1,40333333	0.346727	0.467282	0.288629	3.22567	3.30766	2.21965	1.48433	0.619964	1.0661	1.81339	0.889915	1.52678	-0.02117	0.129775	0.199088	0.112281	0.293371	0.496889
1,40666667	0.347465	0.46865	0.296652	3.24485	3.32057	2.23258	1.48701	0.617269	1.07478	1.81614	0.889606	1.52602	-0.02305	0.129906	0.199655	0.112868	0.288543	0.504685
1,41	0.347751	0.469987	0.298886	3.26568	3.34085	2.24533	1.49017	0.625054	1.07875	1.8149	0.897045	1.52644	-0.02356	0.128711	0.197012	0.112036	0.292519	0.501115
1,41333333	0.352606	0.474486	0.29851	3.28487	3.36495	2.26457	1.4938	0.624478	1.07743	1.81759	0.896172	1.52954	-0.02409	0.130783	0.198401	0.113291	0.295532	0.502817
1,41666667	0.354341	0.477832	0.303533	3.30444	3.37681	2.28332	1.4956	0.627587	1.0778	1.8177	0.893904	1.52921	-0.02291	0.13388	0.19616	0.112011	0.291786	0.506565
1,42	0.360168	0.486868	0.301843	3.32698	3.39514	2.29327	1.49743	0.629812	1.08126	1.81991	0.89362	1.52832	-0.02097	0.134408	0.196535	0.111523	0.288327	0.500926
1,42333333	0.363683	0.485836	0.309439	3.3478	3.41722	2.31153	1.49982	0.629138	1.08545	1.82026	0.896878	1.52394	-0.02087	0.132553	0.194845	0.112375	0.295047	0.504224
1,42666667	0.366217	0.488971	0.312144	3.36786	3.43191	2.32424	1.50322	0.627787	1.08693	1.82003	0.897942	1.5278	-0.02082	0.133751	0.197647	0.114718	0.29708	0.497049
1,43	0.36659	0.492027	0.317676	3.38944	3.45637	2.34162	1.50294	0.630473	1.09205	1.82002	0.896015	1.52932	-0.02098	0.130905	0.196677	0.114034	0.290405	0.50511
1,43333333	0.368939	0.49672	0.317167	3.41082	3.47082	2.35651	1.50522	0.633849	1.09037	1.82028	0.897669	1.52666	-0.02222	0.129452	0.197128	0.11383	0.290596	0.497784
1,43666667	0.369234	0.499543	0.319402	3.43183	3.49291	2.37561	1.5067	0.63334	1.09019	1.8203	0.902328	1.53035	-0.02035	0.128636	0.195659	0.114847	0.297258	0.501792
1,44	0.370752	0.499028	0.321879	3.45158	3.51179	2.38796	1.50855	0.6333	1.09109	1.82033	0.898267	1.53168	-0.01893	0.130537	0.196885	0.113923	0.294992	0.503785
1,44333333	0.375858	0.509646	0.324575	3.47298	3.53093	2.40145	1.50825	0.637662	1.09342	1.82158	0.903881	1.52899	-0.01757	0.130338	0.196375	0.113002	0.287579	0.502157
1,44666667	0.377713	0.5117	0.32971	3.49188	3.54794	2.41956	1.51148	0.638665	1.10058	1.81988	0.904935	1.53571	-0.01438	0.133125	0.196495	0.113746	0.291005	0.504483
1,45	0.379911	0.5134	0.329636	3.51466	3.56509	2.44195	1.5131	0.642061	1.09926	1.81839	0.903607	1.53399	-0.0123	0.134748	0.196863	0.115921	0.29493	0.499157
1,45333333	0.383227	0.518552	0.333612	3.53398	3.5834	2.45641	1.5152	0.646361	1.10309	1.81806	0.905658	1.53175	-0.01353	0.134373	0.198066	0.115955	0.29062	0.505406
1,45666667	0.388363	0.521978	0.337863	3.55532	3.60595	2.46399	1.51716	0.645185	1.09882	1.81644	0.905887	1.53202	-0.01166	0.134407	0.198812	0.116808	0.287807	0.499643
1,46	0.387887	0.526432	0.341689	3.57467	3.62185	2.48186	1.5197	0.644452	1.10508	1.81544	0.902805	1.53292	-0.00993	0.133216	0.199614	0.118356	0.293167	0.505669
1,46333333	0.39141	0.525387	0.341759	3.59536	3.64208	2.49834	1.52165	0.646712	1.10537	1.81637	0.904054	1.5329	-0.01116	0.13053	0.198803	0.118033	0.296665	0.505244
1,46666667	0.394157	0.532587	0.345308	3.61471	3.66073	2.50665	1.52438	0.646768	1.10703	1.81772	0.905336	1.53498	-0.01309	0.128309	0.197011	0.117835	0.291349	0.503051
1,47	0.397847	0.539391	0.350789	3.63675	3.67747	2.5286	1.52761	0.650433	1.10759	1.81906	0.904987	1.53541	-0.01335	0.127624	0.194339	0.116819	0.288783	0.506076
1,47333333	0.398552	0.542265	0.350037	3.65596	3.69761	2.54153	1.52931	0.656228	1.10357	1.82093	0.911108	1.5317	-0.01467	0.125932	0.193891	0.117235	0.292673	0.498301
1,47666667	0.403381	0.542174	0.351521	3.67562	3.71486	2.55582	1.53182	0.657863	1.10846	1.82284	0.907663	1.53185	-0.01878	0.12643	0.194956	0.117243	0.295405	0.502286
1,48	0.405934	0.544419	0.356759	3.69349	3.73616	2.57181	1.535	0.655345	1.11648	1.82302	0.911592	1.53434	-0.01748	0.127969	0.196124	0.118192	0.291198	0.495692
1,48333333	0.409545	0.54905	0.360087	3.71314	3.75111	2.58919	1.53748	0.656883	1.11455	1.82433	0.914684	1.53437	-0.01289	0.13031	0.199615	0.118143	0.291839	0.506845
1,48666667	0.41307	0.551297	0.364503	3.73542	3.7718	2.60638	1.5403	0.657366	1.11701	1.82216	0.914196	1.53808	-0.00852	0.129776	0.199869	0.118488	0.296965	0.504442
1,49	0.415918	0.555595	0.367478	3.75506	3.79183	2.61931	1.54391	0.660865	1.11782	1.82063	0.912608	1.53576	-0.00815	0.132329	0.200111	0.117462	0.299028	0.507145
1,49333333	0.419031	0.562619	0.36862	3.77365	3.80584	2.63526	1.54695	0.661456	1.1183	1.82063	0.917587	1.5332	-0.00431	0.132568	0.198234	0.11777	0.2959	0.51097
1,49666667	0.421876	0.567822	0.375203	3.79427	3.82336	2.65241	1.54685	0.66405	1.12117	1.82038	0.916041	1.53354	-0.00247	0.135805	0.197032	0.117348	0.293403	0.504569
1,5	0.426551	0.569946	0.374171	3.81425	3.84314	2.66592	1.54854	0.662958	1.12112	1.81884	0.915345	1.53722	-0.00288	0.136668	0.195164	0.119049	0.294292	0.506901
1,50333333	0.427398	0.572665	0.380212	3.83477	3.86609	2.68199	1.55162	0.668903	1.12146	1.82125	0.918624	1.53257	-0.00338	0.139311	0.196837	0.120166	0.294903	0.498032
1,50666667	0.430665	0.575114	0.379825	3.85415	3.88605	2.70097	1.55253	0.665788	1.12247	1.82283	0.918684	1.53604	-0.00284	0.137733	0.196343	0.121453	0.29383	0.508206
1,51	0.433684	0.576491	0.38338	3.87632	3.89731	2.71962	1.55342	0.671286	1.12643	1.82287	0.921187	1.53393	-0.00452	0.135732	0.19713	0.122564	0.289974	0.498043
1,51333333	0.435356	0.584641	0.385308	3.89714	3.91555	2.73212	1.55611	0.668932	1.12629	1.82064	0.919048	1.53639	-0.00694	0.132671	0.199146	0.122372	0.290802	0.506525
1,51666667	0.435167	0.588914	0.396088	3.91641	3.93617	2.74692	1.55737	0.671587	1.12758	1.82249	0.920043	1.53534	-0.00748	0.131457	0.198719	0.122035	0.292043	0.50133
1,52	0.437761	0.587826	0.391523	3.93756	3.95169	2.76034	1.55716	0.676204	1.13224	1.82153	0.922964	1.53644	-0.01121	0.132525	0.199535	0.122782	0.293295	0.502858
1,52333333	0.44059	0.595272	0.399082	3.9579	3.97378	2.78096	1.55886	0.671078	1.1281	1.81964	0.922706	1.53381	-0.01128	0.133704	0.199541	0.121831	0.289816	0.503752
1,52666667	0.442284	0.599916	0.396321	3.97473	3.98875	2.79556	1.56209	0.673037	1.13301	1.82153	0.922609	1.53333	-0.01017	0.138003	0.20252	0.120168	0.290727	0.502503
1,53	0.446224	0.600797	0.4039	3.9948	4.0094	2.81073	1.56422	0.675106	1.13375	1.82428	0.925628	1.53616	-0.01072	0.139144	0.200925	0.121956	0.293813	0.509885
1,53333333	0.452157	0.604414	0.400862	4.01509	4.02785	2.83051	1.56577	0.676862	1.13403	1.82223	0.920622	1.54114	-0.01181	0.139826	0.202313	0.123006	0.297004	0.503573
1,53666667	0.457456	0.607244	0.408355	4.03637	4.04019	2.83957	1.56733	0.67878	1.13555	1.82128	0.925033	1.53437	-0.00943	0.139488	0.199105	0.123711	0.294596	0.512742
1,54	0.459125	0.611017	0.416307	4.05475	4.06181	2.8578	1.56942	0.680836	1.13688	1.8226	0.924603	1.53624	-0.00957	0.138825	0.197376	0.124491	0.292625	0.499951
1,54333333	0.46367	0.613105	0.41536	4.0755	4.07773	2.8759	1.56871	0.682271	1.14247	1.82012	0.924496	1.53586	-0.00888	0.138148	0.194583	0.125997	0.29537	0.509445
1,54666667	0.46737	0.615565	0.418585	4.09351	4.09259	2.88623	1.56908	0.684623	1.14569	1.81949	0.929602	1.53698	-0.0084	0.136518	0.19463	0.124853	0.29866	0.496954
1,55	0.468243	0.621933	0.417942	4.11338	4.11205	2.90483	1.57099	0.683227	1.14293	1.81931	0.929454	1.53488	-0.00908	0.134842	0.196667	0.123506	0.297444	0.507572
1,55333333	0.471531	0.626457	0.420348	4.1333	4.13316	2.91834	1.57251	0.683311	1.14429	1.82052	0.926911	1.53513	-0.00697	0.135535	0.198962	0.121008	0.292505	0.501212
1,55666667	0.476365	0.627229	0.431475	4.15414	4.14631	2.93752	1.57362	0.689928	1.14504	1.82194	0.926825	1.53477	-0.00694	0.137006	0.201735	0.12138	0.294726	0.507656
1,56	0.477778	0.636933	0.430674	4.17328	4.16266	2.95465	1.57616	0.693106	1.14596	1.82162	0.925259	1.53826	-0.00817	0.139037	0.203616	0.12087	0.296429	0.502578
1,56333333	0.480549	0.636841	0.432082	4.19335	4.18571	2.96004	1.57917	0.691551	1.14604	1.82122	0.931528	1.53813	-0.00947	0.140414	0.203713	0.121878	0.295916	0.50471
1,56666667	0.485126	0.643046	0.433278	4.21193	4.20524	2.98516	1.58093	0.694354	1.14742	1.82234	0.934018	1.53691	-0.00636	0.141526	0.201801	0.121095	0.291138	0.504348
1,57	0.488792	0.646884	0.441839	4.23135	4.21741	2.9946	1.58368	0.693823	1.15115	1.82067	0.934302	1.53851	-0.00938	0.141912	0.201707	0.122861	0.293208	0.501526
1,57333333	0.492072	0.650463	0.439265	4.24774	4.23397	3.0171	1.58624	0.691647	1.15159	1.82025	0.930159	1.53712	-0.01044	0.138558	0.200481	0.12278	0.29481	0.50888
1,57666667	0.49581	0.655853	0.445308	4.26603	4.25309	3.02717	1.5882	0.693037	1.15049	1.82182	0.930633	1.53743	-0.00639	0.136883	0.197736	0.122723	0.295717	0.502336
1,58	0.498725	0.655406	0.445411	4.28463	4.2695	3.04168	1.58816	0.690376	1.1518	1.82514	0.930177	1.54426	-0.00432	0.135804	0.197711	0.12458	0.292389	0.510611
1,58333333	0.501214	0.660581	0.452239	4.3029	4.28529	3.06176	1.58889	0.694469	1.15446	1.82676	0.932051	1.53868	-0.00611	0.13873	0.196685	0.124767	0.293129	0.500917
1,58666667	0.503969	0.666066	0.461144	4.32431	4.30396	3.07389	1.58971	0.696381	1.15349	1.83024	0.929579	1.53768	-0.00124	0.136302	0.197304	0.124156	0.29469	0.513687
1,59	0.507062	0.667722	0.46163	4.34448	4.32442	3.08998	1.58984	0.700778	1.15477	1.82818	0.932266	1.53963	0.001417	0.140799	0.200199	0.126401	0.297729	0.499263
1,59333333	0.511297	0.673707	0.462098	4.36229	4.34214	3.10944	1.58991	0.702636	1.15971	1.82768	0.934273	1.54095	0.001815	0.141103	0.202543	0.127563	0.296923	0.515052
1,59666667	0.5162	0.676001	0.464645	4.38045	4.35498	3.12658	1.59366	0.697032	1.15794	1.82476	0.931895	1.53574	0.005525	0.144309	0.202755	0.127142	0.295308	0.503362
1,6	0.519749	0.683539	0.471864	4.39853	4.37075	3.14166	1.59576	0.702661	1.16129	1.82391	0.939336	1.53861	0.006876	0.140807	0.205058	0.130114	0.295119	0.514462
1,60333333	0.524439	0.680179	0.469956	4.41765	4.38875	3.15891	1.59808	0.709181	1.16479	1.8223	0.934826	1.53983	0.006149	0.139787	0.204739	0.131264	0.298109	0.502429
1,60666667	0.528364	0.690017	0.476468	4.43473	4.40606	3.16559	1.60052	0.703514	1.16468	1.82302	0.937112	1.5338	0.007198	0.133911	0.202258	0.129173	0.297793	0.512608
1,61	0.530752	0.687552	0.475519	4.4532	4.42255	3.18887	1.60229	0.708256	1.16228	1.82279	0.936548	1.53791	0.005093	0.130476	0.20028	0.127184	0.293827	0.501085
1,61333333	0.532083	0.695389	0.485504	4.47031	4.43695	3.2057	1.60309	0.709394	1.16526	1.8238	0.936382	1.53402	0.004759	0.128256	0.201025	0.127305	0.294345	0.506819
1,61666667	0.533945	0.700626	0.483463	4.48873	4.45912	3.21835	1.60417	0.710862	1.16512	1.82468	0.936812	1.54258	0.006438	0.12734	0.199991	0.126723	0.298973	0.501442
1,62	0.534221	0.705823	0.490738	4.50732	4.47674	3.2358	1.60661	0.711192	1.16632	1.82771	0.941471	1.53923	0.00741	0.128706	0.200823	0.126883	0.299924	0.503154
1,62333333	0.535945	0.705402	0.4923	4.52512	4.48555	3.24801	1.60774	0.709841	1.16627	1.82852	0.935486	1.53866	0.008599	0.132688	0.203736	0.128328	0.295909	0.503208
1,62666667	0.539146	0.706821	0.495136	4.54309	4.50358	3.26153	1.61041	0.711804	1.16921	1.82914	0.941856	1.53321	0.007458	0.135085	0.205857	0.128955	0.294967	0.499688
1,63	0.54188	0.710257	0.498093	4.56122	4.52355	3.28272	1.61068	0.71336	1.16955	1.82998	0.942757	1.53694	0.005318	0.137024	0.202735	0.129506	0.297083	0.506217
1,63333333	0.546886	0.716894	0.504814	4.57862	4.5404	3.29772	1.61219	0.716405	1.17021	1.82799	0.940588	1.53861	0.005429	0.139133	0.200719	0.128298	0.298174	0.501712
1,63666667	0.551304	0.72344	0.505331	4.60033	4.55491	3.31198	1.61244	0.716079	1.16994	1.82529	0.937871	1.53935	0.000648	0.141711	0.200711	0.1288	0.29513	0.509846
1,64	0.555866	0.725926	0.511826	4.61822	4.56602	3.32692	1.6133	0.716519	1.17143	1.82491	0.937652	1.53658	-0.00174	0.139746	0.196533	0.128396	0.293328	0.498608
1,64333333	0.559287	0.729632	0.514051	4.63604	4.58108	3.34011	1.61387	0.716099	1.17405	1.82443	0.94114	1.54114	-0.00204	0.140957	0.195959	0.128577	0.296029	0.510642
1,64666667	0.564143	0.731413	0.512548	4.65384	4.60407	3.35795	1.6161	0.716547	1.17434	1.82365	0.939514	1.54042	-0.00212	0.141645	0.197441	0.126955	0.298001	0.500468
1,65	0.566653	0.735701	0.51799	4.67091	4.62047	3.3729	1.61741	0.719472	1.17545	1.82623	0.939956	1.53695	-0.0046	0.140475	0.199472	0.12798	0.29816	0.51337
1,65333333	0.572025	0.735659	0.519182	4.68889	4.63553	3.38707	1.61761	0.71896	1.17762	1.82573	0.946546	1.53796	-0.00052	0.139078	0.200598	0.127143	0.299324	0.500772
1,65666667	0.574376	0.74461	0.523039	4.70752	4.64821	3.40745	1.61913	0.717965	1.17572	1.82683	0.943737	1.54278	0.000538	0.141912	0.202365	0.127412	0.299301	0.516579
1,66	0.576908	0.743246	0.528924	4.7237	4.67216	3.42186	1.61931	0.719243	1.17597	1.82613	0.943963	1.53571	0.003064	0.139667	0.203467	0.12786	0.298863	0.503375
1,66333333	0.579897	0.751002	0.533166	4.74138	4.68128	3.43464	1.62014	0.726935	1.17717	1.82504	0.945057	1.54055	0.004113	0.136984	0.205088	0.130627	0.297833	0.514782
1,66666667	0.582598	0.761769	0.533925	4.75857	4.69945	3.44873	1.62028	0.725408	1.17893	1.8255	0.94778	1.54131	0.002083	0.141977	0.205203	0.13043	0.297545	0.499533
1,67	0.58546	0.759375	0.539421	4.77644	4.72102	3.4611	1.6226	0.725569	1.18334	1.8225	0.942966	1.53855	-0.00654	0.140186	0.206776	0.130965	0.297803	0.513428
1,67333333	0.588112	0.768607	0.543539	4.79252	4.73063	3.47738	1.62451	0.727989	1.18238	1.82499	0.950886	1.53801	-0.00797	0.137721	0.207353	0.131455	0.297703	0.498371
1,67666667	0.592732	0.769836	0.543833	4.81107	4.74463	3.49814	1.62583	0.729703	1.18397	1.82309	0.946581	1.54052	-0.01136	0.143552	0.20456	0.132701	0.300256	0.508436
1,68	0.596513	0.772075	0.547518	4.82579	4.76551	3.50625	1.62678	0.729516	1.17881	1.82595	0.944925	1.5386	-0.01528	0.142475	0.202229	0.130657	0.302216	0.496811
1,68333333	0.600264	0.778519	0.554535	4.8431	4.77722	3.52561	1.62896	0.732668	1.18132	1.82338	0.952425	1.53908	-0.01672	0.139095	0.199599	0.12897	0.30064	0.507298
1,68666667	0.60192	0.776896	0.56132	4.8603	4.79129	3.53815	1.63124	0.730312	1.18436	1.82792	0.947747	1.54368	-0.01177	0.140403	0.197611	0.130835	0.29561	0.495601
1,69	0.604935	0.784608	0.559241	4.87726	4.81113	3.55646	1.6315	0.731094	1.18291	1.82592	0.947688	1.53578	-0.0104	0.142859	0.197719	0.131429	0.297734	0.50574
1,69333333	0.606829	0.790237	0.567275	4.89299	4.82346	3.57438	1.63379	0.730017	1.18624	1.82942	0.951475	1.54028	-0.00985	0.140246	0.200899	0.130563	0.298319	0.498997
1,69666667	0.607433	0.790889	0.563756	4.91012	4.83265	3.59018	1.63421	0.73415	1.19362	1.82808	0.947846	1.53814	-0.01026	0.14254	0.201994	0.130791	0.298528	0.505674
1,7	0.610956	0.796228	0.566016	4.92543	4.85194	3.60325	1.63607	0.737711	1.18665	1.82802	0.950484	1.53906	-0.00838	0.142382	0.205397	0.133503	0.297955	0.498186
1,70333333	0.617188	0.801669	0.577372	4.9438	4.86533	3.61436	1.63487	0.738519	1.18403	1.82789	0.945782	1.54233	-0.01137	0.143733	0.206832	0.132272	0.299676	0.506637
1,70666667	0.6241	0.803353	0.574325	4.95956	4.87802	3.63284	1.63612	0.739287	1.19036	1.82721	0.949552	1.54345	-0.01319	0.143966	0.206689	0.132294	0.298486	0.502413
1,71	0.62684	0.812442	0.578038	4.9752	4.89697	3.64676	1.6367	0.73601	1.18834	1.82515	0.946492	1.54149	-0.01474	0.143713	0.204068	0.131773	0.297221	0.505918
1,71333333	0.633167	0.811371	0.580503	4.99128	4.90685	3.66475	1.63861	0.738085	1.1886	1.82443	0.95863	1.53664	-0.0123	0.144207	0.20352	0.132809	0.298438	0.502525
1,71666667	0.63552	0.815722	0.588712	5.00706	4.92522	3.67796	1.63801	0.739785	1.18922	1.82455	0.951306	1.53867	-0.01135	0.14531	0.202482	0.131323	0.298141	0.506533
1,72	0.639268	0.820173	0.587869	5.02365	4.93799	3.6933	1.64091	0.7478	1.19066	1.82472	0.948005	1.5413	-0.01217	0.143064	0.199065	0.132136	0.298416	0.503961
1,72333333	0.639436	0.821675	0.598898	5.03996	4.95441	3.70741	1.6422	0.736202	1.19628	1.82442	0.951145	1.5434	-0.01525	0.142115	0.199119	0.131754	0.299085	0.504447
1,72666667	0.642928	0.825927	0.598941	5.0572	4.96748	3.72531	1.64386	0.741607	1.19438	1.82549	0.951594	1.53954	-0.01225	0.139844	0.198222	0.133264	0.299495	0.506881
1,73	0.645439	0.830634	0.602508	5.07374	4.98371	3.73759	1.64371	0.745439	1.1936	1.82582	0.951938	1.5394	-0.0114	0.138659	0.199426	0.132764	0.298782	0.506225
1,73333333	0.649621	0.839367	0.60305	5.08891	4.99865	3.7495	1.64539	0.745081	1.19502	1.82826	0.954074	1.54113	-0.01449	0.137148	0.200299	0.134193	0.299438	0.508768
1,73666667	0.653927	0.839448	0.607466	5.10481	5.01035	3.7692	1.64663	0.743397	1.19799	1.82728	0.95306	1.53893	-0.01086	0.137897	0.201244	0.133258	0.298606	0.502749
1,74	0.65888	0.844314	0.610563	5.11846	5.03038	3.77946	1.64786	0.743249	1.19674	1.82923	0.95644	1.54237	-0.01033	0.139246	0.198005	0.134355	0.298669	0.509163
1,74333333	0.665671	0.847674	0.618694	5.13197	5.0434	3.80242	1.64804	0.743283	1.19426	1.8283	0.951502	1.54049	-0.01173	0.142022	0.199577	0.134128	0.298407	0.502425
1,74666667	0.669107	0.853512	0.617382	5.14713	5.05852	3.81231	1.64925	0.745609	1.1984	1.82842	0.951997	1.5418	-0.01528	0.142553	0.199445	0.135475	0.297698	0.508617
1,75	0.673792	0.855642	0.620177	5.16338	5.06903	3.82245	1.65077	0.748014	1.20142	1.82743	0.956371	1.5407	-0.01405	0.143161	0.199133	0.13594	0.299438	0.502988
1,75333333	0.67687	0.862364	0.625091	5.18036	5.07924	3.84036	1.64992	0.748829	1.19883	1.82859	0.955336	1.54265	-0.01485	0.142301	0.198204	0.134911	0.300994	0.51177
1,75666667	0.679393	0.86773	0.629968	5.19511	5.09525	3.85365	1.64866	0.752691	1.20409	1.82677	0.958791	1.53697	-0.01184	0.142654	0.201744	0.133908	0.299809	0.501683
1,76	0.68087	0.870802	0.633375	5.21027	5.10635	3.86921	1.64871	0.750387	1.19975	1.82808	0.95513	1.53962	-0.012	0.141156	0.203939	0.135463	0.298797	0.51047
1,76333333	0.683385	0.871792	0.637832	5.22426	5.12232	3.88506	1.64898	0.750792	1.20014	1.82862	0.954624	1.53598	-0.01002	0.139929	0.203376	0.134201	0.297746	0.502895
1,76666667	0.686048	0.876469	0.640973	5.23909	5.13192	3.90225	1.64837	0.753716	1.1997	1.83081	0.955466	1.53665	-0.00719	0.138883	0.202747	0.133616	0.297565	0.508213
1,77	0.689844	0.877812	0.643059	5.25438	5.15165	3.91879	1.65072	0.752577	1.20339	1.83171	0.958579	1.54116	-0.01004	0.13922	0.201173	0.135515	0.301584	0.498957
1,77333333	0.694871	0.888544	0.648755	5.26994	5.16018	3.92808	1.65177	0.75255	1.20394	1.83173	0.954311	1.53677	-0.01189	0.137941	0.198979	0.136734	0.302856	0.508679
1,77666667	0.699423	0.892339	0.652818	5.28574	5.17692	3.9454	1.6549	0.751589	1.20336	1.83509	0.956191	1.5374	-0.01043	0.137335	0.197304	0.135655	0.301618	0.501376
1,78	0.702801	0.895191	0.655622	5.29939	5.19329	3.95388	1.65582	0.759466	1.20444	1.83576	0.959975	1.5416	-0.00995	0.137806	0.196787	0.13595	0.301179	0.505965
1,78333333	0.706557	0.897197	0.657136	5.31301	5.20431	3.97278	1.6564	0.757405	1.20395	1.83289	0.957308	1.54139	-0.01356	0.139952	0.195561	0.136935	0.301762	0.50148
1,78666667	0.711647	0.900272	0.660461	5.32926	5.21392	3.98378	1.65821	0.753208	1.20691	1.83183	0.957383	1.54162	-0.01426	0.140526	0.199882	0.137371	0.301454	0.508565
1,79	0.71432	0.906105	0.670397	5.34305	5.23241	3.99254	1.66037	0.758763	1.20493	1.83318	0.956609	1.5393	-0.01589	0.140669	0.201133	0.135239	0.30091	0.502904
1,79333333	0.718325	0.911576	0.669895	5.3553	5.24162	4.0135	1.65977	0.756106	1.20724	1.83172	0.954794	1.54255	-0.01899	0.142502	0.202179	0.135626	0.300981	0.507674
1,79666667	0.723227	0.914715	0.673767	5.36985	5.25265	4.03322	1.66085	0.759924	1.20666	1.83046	0.960625	1.53691	-0.02143	0.143019	0.206971	0.136064	0.29972	0.505334
1,8	0.726008	0.919653	0.673162	5.38301	5.26992	4.04563	1.66276	0.760706	1.2109	1.83033	0.961723	1.54239	-0.0218	0.141667	0.211175	0.136514	0.300159	0.50807
1,80333333	0.726102	0.92319	0.677711	5.39796	5.27899	4.05798	1.66247	0.761753	1.20823	1.83095	0.962515	1.54254	-0.01844	0.142366	0.209408	0.136369	0.301209	0.504934
1,80666667	0.730604	0.924743	0.685866	5.41158	5.29168	4.0744	1.66428	0.755014	1.20659	1.83103	0.963006	1.54304	-0.01738	0.142398	0.211553	0.139634	0.302358	0.505921
1,81	0.73212	0.926328	0.687574	5.42428	5.3041	4.08553	1.66391	0.760867	1.20811	1.82871	0.964422	1.53902	-0.01854	0.141347	0.21082	0.13859	0.30097	0.502695
1,81333333	0.736554	0.931581	0.692054	5.43689	5.32194	4.1008	1.66529	0.759881	1.21085	1.82897	0.961243	1.53896	-0.01868	0.141616	0.208494	0.139151	0.299214	0.503899
1,81666667	0.742412	0.946776	0.693458	5.45123	5.3302	4.11807	1.66639	0.760146	1.2099	1.83118	0.962588	1.53679	-0.01877	0.140963	0.20668	0.138514	0.297357	0.50545
1,82	0.748676	0.946738	0.696039	5.46424	5.34823	4.12805	1.6678	0.765728	1.2092	1.83174	0.962239	1.54068	-0.01661	0.141484	0.208576	0.138433	0.298145	0.5055
1,82333333	0.752485	0.945725	0.701268	5.47812	5.3489	4.13928	1.66738	0.765007	1.20772	1.83265	0.959422	1.54335	-0.01558	0.143674	0.208097	0.137472	0.30213	0.50597
1,82666667	0.759226	0.953291	0.704697	5.49026	5.36549	4.15355	1.66964	0.769715	1.20996	1.83409	0.957546	1.53823	-0.01436	0.143678	0.209165	0.137889	0.305463	0.504682
1,83	0.76295	0.956627	0.716803	5.50411	5.38364	4.16569	1.67059	0.767979	1.21252	1.83721	0.966252	1.54294	-0.01525	0.145396	0.207921	0.136958	0.303889	0.506459
1,83333333	0.76696	0.964256	0.716814	5.51667	5.39677	4.18544	1.67121	0.765777	1.21407	1.83612	0.963815	1.53699	-0.0135	0.14878	0.208635	0.136113	0.300892	0.500214
1,83666667	0.770998	0.969306	0.720074	5.53032	5.40508	4.19922	1.67137	0.766548	1.21464	1.83718	0.963096	1.53897	-0.01315	0.150477	0.205352	0.136981	0.297055	0.503863
1,84	0.774055	0.967907	0.72463	5.54146	5.41751	4.21175	1.67252	0.771826	1.213	1.83752	0.964232	1.54401	-0.01376	0.150622	0.204963	0.137571	0.298317	0.499797
1,84333333	0.774379	0.975639	0.728068	5.55568	5.42532	4.22707	1.67426	0.773285	1.21477	1.83707	0.959632	1.54505	-0.01142	0.150772	0.205713	0.137331	0.300145	0.508313
1,84666667	0.778806	0.974982	0.730787	5.56719	5.44062	4.24293	1.67585	0.770784	1.21303	1.83441	0.964952	1.54263	-0.0084	0.149236	0.20752	0.138463	0.303101	0.501672
1,85	0.781064	0.979397	0.731263	5.5797	5.45379	4.24901	1.677	0.771208	1.21474	1.8337	0.962452	1.54146	-0.00871	0.147415	0.206493	0.139359	0.302952	0.511019
1,85333333	0.78631	0.985865	0.738254	5.59151	5.4626	4.26479	1.67691	0.775328	1.21745	1.8293	0.964701	1.54289	-0.00942	0.146056	0.208255	0.14006	0.301858	0.502738
1,85666667	0.790455	0.991661	0.742067	5.60321	5.47049	4.27646	1.6785	0.770953	1.21534	1.82847	0.961656	1.54033	-0.00901	0.143285	0.209304	0.13974	0.299562	0.512822
1,86	0.794339	0.994909	0.747727	5.61583	5.49028	4.29268	1.67896	0.775805	1.21724	1.83015	0.965596	1.54132	-0.01029	0.144506	0.208289	0.141703	0.300732	0.500742
1,86333333	0.795458	0.996569	0.749435	5.62864	5.49863	4.30545	1.67852	0.775786	1.22075	1.83048	0.967456	1.54084	-0.01129	0.145279	0.207773	0.143864	0.303362	0.510009
1,86666667	0.801376	0.997163	0.753273	5.63938	5.51018	4.31916	1.67998	0.776634	1.21798	1.83216	0.963582	1.53852	-0.01056	0.146653	0.207007	0.143637	0.303608	0.499639
1,87	0.807324	1.00694	0.761115	5.65419	5.51709	4.33138	1.68273	0.778868	1.22018	1.83265	0.968212	1.53822	-0.01386	0.147305	0.207559	0.142887	0.300664	0.508882
1,87333333	0.812055	1.00891	0.76149	5.66658	5.53202	4.34702	1.68234	0.775886	1.2207	1.83309	0.963427	1.53758	-0.01365	0.149499	0.207036	0.143545	0.298619	0.495715
1,87666667	0.818538	1.01403	0.763048	5.67729	5.54355	4.35693	1.68305	0.77222	1.2198	1.83287	0.96284	1.53591	-0.01367	0.145696	0.206055	0.141169	0.296777	0.506886
1,88	0.826181	1.01424	0.765612	5.68833	5.55476	4.37503	1.68442	0.777177	1.22226	1.8342	0.964388	1.53747	-0.01356	0.143341	0.206164	0.138826	0.297924	0.493974
1,88333333	0.830279	1.02138	0.768666	5.69954	5.56074	4.38667	1.68566	0.77997	1.22039	1.83454	0.966709	1.54562	-0.01219	0.142225	0.206892	0.13895	0.301311	0.507347
1,88666667	0.833166	1.02681	0.772888	5.71136	5.57615	4.40184	1.68627	0.778146	1.22221	1.83729	0.968876	1.53718	-0.01371	0.14232	0.206379	0.139401	0.303736	0.496968
1,89	0.837329	1.03117	0.780292	5.7246	5.58563	4.41323	1.68804	0.778883	1.21928	1.83751	0.968386	1.53978	-0.01106	0.141155	0.205639	0.139972	0.302343	0.512114
1,89333333	0.840961	1.03711	0.786357	5.73694	5.59304	4.42804	1.688	0.781621	1.22141	1.83832	0.974232	1.53435	-0.01203	0.146028	0.20505	0.142047	0.30165	0.501372
1,89666667	0.842052	1.04011	0.787997	5.74808	5.60727	4.43624	1.68889	0.778421	1.22429	1.83613	0.967546	1.53572	-0.0124	0.149172	0.203909	0.141922	0.300245	0.516976
1,9	0.844346	1.04491	0.792133	5.75981	5.61809	4.45142	1.68897	0.778558	1.22212	1.83507	0.965349	1.53491	-0.01499	0.148992	0.202094	0.143547	0.302961	0.502796
1,90333333	0.84881	1.04665	0.799175	5.77214	5.62987	4.4679	1.68898	0.786117	1.22367	1.83426	0.969311	1.54581	-0.01381	0.148657	0.200936	0.142492	0.304773	0.517299
1,90666667	0.853447	1.05404	0.798651	5.78247	5.63413	4.47747	1.68991	0.784952	1.22246	1.83462	0.967693	1.53839	-0.01712	0.150166	0.1982	0.142424	0.304296	0.500452
1,91	0.858452	1.0586	0.801688	5.79241	5.64757	4.49387	1.69107	0.77903	1.22466	1.83316	0.963981	1.54007	-0.01694	0.149836	0.196489	0.14223	0.302187	0.514596
1,91333333	0.864243	1.05963	0.804715	5.80287	5.65559	4.50333	1.69101	0.78272	1.22005	1.83534	0.969234	1.5385	-0.01614	0.149578	0.195971	0.142232	0.301878	0.49928
1,91666667	0.869182	1.07146	0.811227	5.81328	5.66934	4.51504	1.69029	0.785752	1.22465	1.83578	0.968159	1.53915	-0.01695	0.150679	0.19734	0.141434	0.300937	0.512891
1,92	0.87329	1.07109	0.813974	5.82316	5.67571	4.52965	1.69115	0.781731	1.21901	1.83599	0.968452	1.54322	-0.01601	0.15017	0.197124	0.142396	0.302607	0.497657
1,92333333	0.875986	1.07172	0.820976	5.8338	5.68664	4.54518	1.69062	0.788585	1.22559	1.83618	0.967332	1.54023	-0.01777	0.149922	0.198326	0.141428	0.305223	0.513542
1,92666667	0.880217	1.08025	0.821163	5.84403	5.69595	4.55571	1.69174	0.787593	1.22107	1.83661	0.973228	1.53872	-0.01895	0.149641	0.199812	0.142027	0.304759	0.498946
1,93	0.883589	1.08019	0.82783	5.85501	5.70954	4.56788	1.69285	0.784941	1.22907	1.83652	0.970593	1.54341	-0.01996	0.150889	0.199395	0.142189	0.301293	0.512517
1,93333333	0.886552	1.08452	0.831963	5.86619	5.71532	4.58308	1.69271	0.783895	1.22331	1.83594	0.968803	1.53993	-0.02004	0.14911	0.200695	0.142094	0.298417	0.500034
1,93666667	0.889412	1.09067	0.833261	5.8785	5.73015	4.59642	1.69365	0.78638	1.22618	1.83553	0.971193	1.53912	-0.01919	0.148263	0.201372	0.139952	0.299381	0.515519
1,94	0.894656	1.10027	0.840459	5.88694	5.73413	4.60336	1.6945	0.788632	1.22479	1.83384	0.970233	1.5412	-0.01924	0.148166	0.202345	0.14191	0.302744	0.49999
1,94333333	0.897196	1.09809	0.841386	5.89757	5.75006	4.61658	1.69489	0.785823	1.22848	1.8348	0.970797	1.53939	-0.0162	0.145017	0.203141	0.141322	0.305766	0.512826
1,94666667	0.901342	1.10132	0.846895	5.90615	5.75679	4.62972	1.69616	0.789132	1.22539	1.83462	0.971112	1.5401	-0.01658	0.141693	0.203324	0.141929	0.30529	0.501198
1,95	0.904232	1.11026	0.847312	5.91567	5.76307	4.64454	1.69757	0.789583	1.22695	1.83601	0.971359	1.54033	-0.01573	0.143145	0.201752	0.143044	0.302704	0.510855
1,95333333	0.908245	1.11469	0.852301	5.92471	5.77127	4.65344	1.69908	0.789796	1.22707	1.83694	0.972828	1.53892	-0.01617	0.142967	0.201362	0.144586	0.298099	0.498723
1,95666667	0.912015	1.1188	0.859422	5.9349	5.78401	4.66848	1.69961	0.789051	1.22918	1.83646	0.972829	1.54145	-0.01387	0.140065	0.19991	0.142199	0.29675	0.512197
1,96	0.914526	1.12104	0.856797	5.9431	5.79103	4.67732	1.69847	0.793125	1.22675	1.83674	0.973235	1.53927	-0.01566	0.141089	0.19837	0.143956	0.299609	0.500875
1,96333333	0.918139	1.12474	0.862693	5.95171	5.8026	4.69053	1.69843	0.791964	1.22963	1.83675	0.970579	1.53607	-0.01618	0.143804	0.197206	0.145145	0.305789	0.512368
1,96666667	0.924271	1.13079	0.870999	5.95968	5.81178	4.69956	1.69935	0.794149	1.22622	1.83806	0.974743	1.54042	-0.01508	0.143423	0.195588	0.144561	0.306851	0.503534
1,97	0.930711	1.13534	0.878872	5.97047	5.82097	4.71681	1.699	0.794326	1.22845	1.8388	0.970996	1.54392	-0.01436	0.142878	0.195698	0.14569	0.305705	0.514471
1,97333333	0.936892	1.13847	0.878943	5.97887	5.82712	4.72298	1.69881	0.793265	1.22684	1.84001	0.970012	1.54238	-0.01368	0.142856	0.197749	0.146854	0.302204	0.500556
1,97666667	0.943295	1.14154	0.878184	5.98846	5.84085	4.73534	1.70126	0.797622	1.22809	1.83788	0.974961	1.5391	-0.01291	0.144194	0.198731	0.146627	0.29951	0.509126
1,98	0.94825	1.14567	0.884064	5.99812	5.84517	4.75125	1.70022	0.797005	1.23231	1.83786	0.974923	1.54254	-0.0135	0.144053	0.200853	0.144978	0.297803	0.500608
1,98333333	0.953914	1.1533	0.889018	6.00744	5.85065	4.76279	1.70006	0.794609	1.226	1.83579	0.973044	1.54073	-0.01836	0.144586	0.205596	0.144622	0.302723	0.505876
1,98666667	0.957705	1.15963	0.896188	6.01582	5.86419	4.77689	1.70038	0.795771	1.23253	1.8354	0.977398	1.53994	-0.01848	0.146931	0.207237	0.143335	0.307744	0.496759
1,99	0.958827	1.16193	0.901458	6.02436	5.8754	4.78485	1.70156	0.796374	1.23142	1.83531	0.974058	1.53896	-0.01754	0.149611	0.207822	0.144176	0.308077	0.507957
1,99333333	0.963742	1.16365	0.892444	6.03333	5.87616	4.79372	1.7002	0.793786	1.22991	1.83571	0.976999	1.53846	-0.02073	0.148912	0.208812	0.144125	0.3047	0.501191
1,99666667	0.967684	1.16924	0.906899	6.0425	5.88873	4.80986	1.70101	0.796181	1.23379	1.83715	0.972134	1.53621	-0.01874	0.148923	0.206207	0.14435	0.301483	0.505408
2	0.970405	1.17157	0.910086	6.05175	5.89442	4.82174	1.70186	0.795078	1.23763	1.84043	0.973696	1.54182	-0.0151	0.149121	0.202901	0.144901	0.298866	0.504259
2,00333333	0.974878	1.17433	0.913322	6.06094	5.90529	4.83286	1.70167	0.798827	1.23069	1.83896	0.974191	1.54072	-0.0152	0.150632	0.201289	0.146625	0.299704	0.504698
2,00666667	0.980668	1.17941	0.918298	6.06804	5.91061	4.84485	1.70215	0.800145	1.2288	1.84063	0.973858	1.53954	-0.01807	0.151214	0.203071	0.145957	0.303407	0.499858
2,01	0.983519	1.18888	0.926043	6.07679	5.92324	4.85334	1.70383	0.800083	1.23158	1.84306	0.975312	1.54279	-0.01666	0.150336	0.202564	0.145221	0.304451	0.50035
2,01333333	0.985895	1.19491	0.92916	6.08561	5.93192	4.86616	1.70551	0.798242	1.23208	1.8417	0.979425	1.5396	-0.01621	0.149455	0.20546	0.145328	0.304002	0.502267
2,01666667	0.989526	1.19396	0.931311	6.09339	5.93991	4.8782	1.70544	0.801719	1.2327	1.83739	0.974693	1.53984	-0.01583	0.149587	0.207997	0.144668	0.300946	0.497211
2,02	0.992094	1.19632	0.934421	6.10226	5.94671	4.8946	1.70465	0.801096	1.23014	1.84011	0.974918	1.54144	-0.01513	0.147169	0.209107	0.144788	0.297646	0.503601
2,02333333	0.997483	1.20398	0.939364	6.11158	5.94859	4.89876	1.70531	0.799882	1.23498	1.83917	0.975806	1.53894	-0.0151	0.147917	0.207629	0.144048	0.29666	0.499948
2,02666667	1.00274	1.20863	0.940004	6.11821	5.96195	4.90984	1.70549	0.806165	1.23121	1.83705	0.974486	1.53812	-0.01247	0.148772	0.208162	0.143368	0.30117	0.508641
2,03	1.00856	1.20599	0.947664	6.12546	5.96868	4.91763	1.70654	0.805893	1.23177	1.83667	0.981281	1.53832	-0.0134	0.14977	0.208964	0.144262	0.306633	0.497303
2,03333333	1.01265	1.21125	0.951292	6.13219	5.97428	4.93528	1.70708	0.801574	1.23511	1.83864	0.976951	1.54003	-0.01381	0.150313	0.207864	0.145068	0.308239	0.508097
2,03666667	1.01838	1.22406	0.956352	6.14093	5.98262	4.9374	1.70946	0.799924	1.23362	1.838	0.98041	1.53928	-0.01609	0.149622	0.209243	0.145373	0.305908	0.494847
2,04	1.02155	1.22461	0.965951	6.14831	5.99208	4.9538	1.70931	0.80333	1.23431	1.83748	0.980488	1.54352	-0.01601	0.146453	0.208584	0.146175	0.302178	0.505666
2,04333333	1.0251	1.23007	0.965492	6.1564	5.99655	4.96395	1.70939	0.807423	1.23425	1.83935	0.981256	1.53937	-0.01672	0.1495	0.205459	0.147158	0.29856	0.492114
2,04666667	1.02907	1.23605	0.968167	6.16276	6.00064	4.97459	1.70843	0.800506	1.23458	1.83971	0.978791	1.54157	-0.01964	0.150115	0.203671	0.147098	0.295956	0.507642
2,05	1.03373	1.23684	0.97324	6.17088	6.00733	4.98925	1.70992	0.805034	1.23572	1.83751	0.979326	1.53886	-0.01971	0.149291	0.202326	0.145833	0.298804	0.494817
2,05333333	1.03617	1.24487	0.97736	6.178	6.0196	4.99129	1.71063	0.806114	1.23268	1.83925	0.980477	1.53909	-0.01891	0.149696	0.201876	0.14434	0.304135	0.510307
2,05666667	1.04073	1.24942	0.982021	6.18565	6.02557	5.00874	1.71124	0.804451	1.23658	1.84035	0.974881	1.53967	-0.01927	0.152985	0.201318	0.143586	0.30893	0.497967
2,06	1.04455	1.25482	0.982994	6.19171	6.03448	5.01088	1.71207	0.808259	1.23607	1.83775	0.979781	1.53914	-0.02001	0.150427	0.202205	0.143293	0.308013	0.510472
2,06333333	1.04862	1.25327	0.985807	6.19857	6.04099	5.0304	1.71421	0.80592	1.23645	1.83723	0.977216	1.53683	-0.01755	0.149774	0.20365	0.144166	0.304906	0.498999
2,06666667	1.05243	1.26364	0.996158	6.20453	6.0519	5.03681	1.71407	0.811345	1.23654	1.83892	0.984123	1.54394	-0.01587	0.150309	0.202183	0.14553	0.30068	0.509837
2,07	1.06059	1.26093	0.99332	6.2117	6.05395	5.04801	1.71462	0.806094	1.23266	1.83893	0.974214	1.53946	-0.01512	0.150223	0.199959	0.145361	0.298033	0.500789
2,07333333	1.06567	1.26687	1.00035	6.21725	6.06026	5.0599	1.71462	0.811417	1.23962	1.83854	0.980825	1.54016	-0.01424	0.147781	0.198486	0.145939	0.297838	0.507765
2,07666667	1.06939	1.27509	1.00233	6.22514	6.06701	5.07265	1.71455	0.809069	1.23754	1.83821	0.981654	1.53825	-0.01584	0.149813	0.200923	0.14394	0.303473	0.501652
2,08	1.07697	1.27951	1.01332	6.23205	6.07422	5.07795	1.71376	0.809518	1.23263	1.84008	0.978391	1.53492	-0.01819	0.148994	0.201202	0.144453	0.307699	0.506451
2,08333333	1.08119	1.28252	1.00924	6.24052	6.08621	5.09229	1.71255	0.807336	1.23634	1.83964	0.981342	1.54149	-0.0215	0.148581	0.203833	0.144505	0.307999	0.501021
2,08666667	1.08517	1.28606	1.01867	6.24749	6.08866	5.09776	1.7125	0.812971	1.23917	1.8387	0.98155	1.53529	-0.02254	0.151004	0.203977	0.147539	0.304087	0.501118
2,09	1.08578	1.29229	1.01862	6.25381	6.09589	5.11609	1.71271	0.814065	1.23645	1.8371	0.979367	1.53676	-0.02196	0.151059	0.206864	0.148296	0.298639	0.503192
2,09333333	1.09082	1.29501	1.02684	6.25848	6.10678	5.1219	1.71311	0.807294	1.23885	1.83932	0.983427	1.54099	-0.01948	0.150226	0.208598	0.15168	0.293279	0.498356
2,09666667	1.0946	1.30198	1.0249	6.26581	6.11105	5.13187	1.71321	0.813638	1.2405	1.83973	0.980376	1.53976	-0.01731	0.15028	0.207958	0.14956	0.291647	0.502515
2,1	1.1015	1.30337	1.03181	6.27019	6.11441	5.14	1.71679	0.808384	1.24058	1.84079	0.978445	1.53995	-0.01526	0.149931	0.20844	0.14914	0.29478	0.499562
2,10333333	1.10403	1.30763	1.03634	6.27647	6.12718	5.1537	1.71734	0.811222	1.23825	1.83887	0.97969	1.54304	-0.01556	0.14951	0.210078	0.149686	0.302166	0.50513
2,10666667	1.11307	1.31278	1.04268	6.28282	6.12588	5.15723	1.71795	0.809936	1.2388	1.8396	0.981962	1.53782	-0.01457	0.148362	0.209103	0.149608	0.308117	0.496228
2,11	1.11802	1.31746	1.04482	6.28976	6.13283	5.16358	1.71915	0.815764	1.23748	1.83958	0.978432	1.53666	-0.0159	0.148876	0.207526	0.148296	0.311225	0.508886
2,11333333	1.1207	1.32421	1.05164	6.29477	6.13726	5.18014	1.71995	0.819308	1.2411	1.83712	0.983909	1.53934	-0.01526	0.14999	0.206188	0.149344	0.310473	0.497606
2,11666667	1.12464	1.32524	1.05427	6.3008	6.14615	5.18712	1.72013	0.813108	1.23803	1.83663	0.981954	1.5406	-0.01771	0.150582	0.204745	0.148341	0.305996	0.509397
2,12	1.13175	1.3305	1.05988	6.30669	6.15474	5.19555	1.72047	0.809674	1.23885	1.83974	0.98312	1.54148	-0.01785	0.149676	0.203744	0.147206	0.299421	0.49991
2,12333333	1.13617	1.33516	1.06176	6.31287	6.16023	5.20929	1.72122	0.815088	1.23788	1.84042	0.979502	1.53731	-0.01548	0.154215	0.203673	0.146957	0.294973	0.513497
2,12666667	1.14068	1.33593	1.06515	6.31825	6.16675	5.21679	1.72137	0.817932	1.23571	1.84099	0.98337	1.54066	-0.01637	0.153654	0.203249	0.14717	0.291348	0.498533
2,13	1.14655	1.34434	1.07112	6.32495	6.17629	5.22127	1.72019	0.820984	1.239	1.84249	0.980251	1.53825	-0.01887	0.154348	0.203483	0.146698	0.292398	0.512237
2,13333333	1.14961	1.34807	1.07259	6.33178	6.18073	5.24074	1.7203	0.814807	1.23959	1.84274	0.98425	1.53761	-0.01588	0.153563	0.205233	0.148356	0.296574	0.497432
2,13666667	1.15242	1.35	1.0814	6.33972	6.1808	5.24441	1.72027	0.819883	1.2395	1.84087	0.981883	1.53917	-0.01656	0.154837	0.203828	0.14684	0.303678	0.508498
2,14	1.15619	1.35178	1.08628	6.34497	6.18729	5.25232	1.72235	0.818049	1.23619	1.8423	0.979687	1.53997	-0.02191	0.152503	0.20221	0.147372	0.309348	0.492658
2,14333333	1.16037	1.36455	1.08761	6.35178	6.19521	5.26751	1.72353	0.817122	1.23921	1.84372	0.986003	1.53863	-0.02118	0.154279	0.200622	0.14689	0.313724	0.505679
2,14666667	1.16477	1.36884	1.09129	6.35555	6.20037	5.27479	1.72678	0.816006	1.24056	1.84353	0.985329	1.54078	-0.01656	0.152298	0.20041	0.147639	0.314571	0.492236
2,15	1.16968	1.37424	1.09496	6.36095	6.20812	5.28214	1.72764	0.812056	1.23936	1.84426	0.981038	1.54271	-0.01585	0.153762	0.198816	0.146803	0.311763	0.502761
2,15333333	1.17347	1.37425	1.10305	6.36509	6.21588	5.28679	1.72687	0.816782	1.24036	1.84553	0.983282	1.53906	-0.0136	0.151542	0.198905	0.148364	0.305464	0.494388
2,15666667	1.17897	1.37944	1.10922	6.37186	6.21966	5.30018	1.72769	0.820449	1.24135	1.84315	0.98557	1.53854	-0.01407	0.152119	0.200927	0.147924	0.297617	0.505805
2,16	1.18519	1.38552	1.11018	6.3771	6.2211	5.30935	1.72707	0.818208	1.23975	1.84206	0.982401	1.54206	-0.01487	0.149246	0.201577	0.148491	0.293881	0.496553
2,16333333	1.18872	1.39058	1.11811	6.38381	6.22747	5.31283	1.72714	0.820547	1.24031	1.84102	0.984378	1.53567	-0.01608	0.150841	0.203914	0.148267	0.293142	0.502549
2,16666667	1.19154	1.38906	1.118	6.3882	6.23269	5.33214	1.72668	0.818126	1.24056	1.84084	0.984568	1.5376	-0.01798	0.14939	0.207113	0.14914	0.295769	0.499747
2,17	1.19704	1.39483	1.11965	6.3955	6.23707	5.34167	1.72814	0.820753	1.24286	1.83959	0.987018	1.53982	-0.01723	0.150707	0.210776	0.149141	0.300629	0.499431
2,17333333	1.20121	1.40404	1.1228	6.40039	6.2412	5.34473	1.72653	0.820063	1.24279	1.84153	0.984745	1.5391	-0.01555	0.154039	0.210944	0.149169	0.308637	0.499388
2,17666667	1.20148	1.40728	1.13186	6.40491	6.24518	5.34755	1.72776	0.821145	1.23735	1.84055	0.984385	1.53943	-0.01244	0.156642	0.211276	0.149061	0.311413	0.498566
2,18	1.20556	1.4114	1.13402	6.41022	6.25346	5.36015	1.72793	0.821134	1.24293	1.84397	0.982717	1.53707	-0.01387	0.15523	0.211981	0.150606	0.309907	0.503696
2,18333333	1.21197	1.41475	1.13684	6.41509	6.25965	5.36588	1.72768	0.822492	1.2384	1.84275	0.985688	1.53963	-0.01452	0.157184	0.208292	0.150002	0.305283	0.49745
2,18666667	1.21638	1.42069	1.1446	6.41779	6.26602	5.3773	1.72895	0.820696	1.24068	1.84434	0.981684	1.53879	-0.01415	0.157328	0.204644	0.150096	0.300476	0.506142
2,19	1.22133	1.41895	1.14743	6.42445	6.26702	5.38124	1.73031	0.820511	1.24167	1.84322	0.985187	1.53869	-0.01247	0.153568	0.205485	0.150848	0.294298	0.494589
2,19333333	1.22853	1.42756	1.14706	6.42807	6.27557	5.39226	1.72826	0.821257	1.24098	1.84351	0.985134	1.54052	-0.01444	0.152316	0.204145	0.152032	0.293661	0.505833
2,19666667	1.23333	1.43266	1.15406	6.43247	6.28028	5.40341	1.7278	0.820678	1.2416	1.84227	0.985071	1.53716	-0.01381	0.152736	0.202602	0.150846	0.296124	0.492154
2,2	1.23774	1.44215	1.16079	6.43697	6.2863	5.41048	1.72783	0.824162	1.24667	1.84372	0.981746	1.54241	-0.01143	0.151656	0.204631	0.152649	0.301941	0.504488
2,20333333	1.24339	1.44448	1.16409	6.44179	6.28822	5.41699	1.72778	0.817888	1.24085	1.84456	0.983665	1.53536	-0.01095	0.149971	0.205918	0.151336	0.307722	0.491816
2,20666667	1.24809	1.44577	1.1636	6.44527	6.29241	5.43081	1.7276	0.821941	1.23892	1.84658	0.987512	1.53488	-0.01151	0.148313	0.2036	0.151655	0.311626	0.505061
2,21	1.25219	1.45178	1.17291	6.45043	6.29884	5.43411	1.72914	0.825728	1.24287	1.84751	0.985346	1.53785	-0.01089	0.147956	0.204144	0.152397	0.309932	0.493492
2,21333333	1.25807	1.44938	1.17654	6.45595	6.30569	5.44166	1.73002	0.82419	1.24014	1.84658	0.983692	1.53782	-0.00904	0.148047	0.202706	0.152151	0.305444	0.503335
2,21666667	1.26197	1.46202	1.18073	6.46081	6.30767	5.45043	1.73019	0.828088	1.24149	1.84671	0.985813	1.54344	-0.01093	0.149019	0.202666	0.151669	0.3014	0.495074
2,22	1.26617	1.46601	1.18607	6.46541	6.31615	5.45638	1.73078	0.825434	1.24294	1.84703	0.985519	1.53944	-0.0113	0.152086	0.204776	0.151687	0.295656	0.501645
2,22333333	1.26924	1.4662	1.19145	6.47072	6.31769	5.46458	1.73097	0.823562	1.24157	1.84661	0.984757	1.53811	-0.01279	0.155395	0.207285	0.150082	0.292621	0.498372
2,22666667	1.27565	1.46999	1.19771	6.4753	6.32204	5.47264	1.73165	0.825784	1.24073	1.84545	0.988157	1.5409	-0.01487	0.156512	0.204968	0.149374	0.293503	0.500654
2,23	1.27997	1.48114	1.20042	6.47833	6.32424	5.48207	1.73131	0.824327	1.24535	1.84817	0.985879	1.54076	-0.0152	0.156483	0.206378	0.151101	0.297477	0.503377
2,23333333	1.28566	1.48008	1.2052	6.48214	6.33127	5.49147	1.73177	0.821236	1.24162	1.84837	0.991921	1.54141	-0.01343	0.156413	0.20646	0.150547	0.30078	0.500395
2,23666667	1.2915	1.48495	1.20475	6.48444	6.33752	5.49782	1.73184	0.824927	1.24255	1.8479	0.988784	1.5399	-0.01962	0.154481	0.205991	0.149519	0.306669	0.505722
2,24	1.29863	1.49189	1.21207	6.48764	6.3441	5.50526	1.73167	0.831354	1.24208	1.84874	0.987599	1.53802	-0.01769	0.153276	0.20489	0.151757	0.309376	0.497581
2,24333333	1.30269	1.48866	1.21477	6.49091	6.34636	5.5096	1.72973	0.826726	1.24766	1.85063	0.991492	1.53959	-0.01915	0.152644	0.206969	0.151078	0.311775	0.5058
2,24666667	1.30771	1.49868	1.21899	6.49368	6.35056	5.51981	1.72984	0.825163	1.24207	1.84902	0.989616	1.54045	-0.02198	0.153729	0.205881	0.150359	0.311642	0.492771
2,25	1.31092	1.50715	1.22666	6.49654	6.35681	5.52112	1.7308	0.825929	1.23978	1.84825	0.986064	1.53343	-0.02069	0.153257	0.202842	0.151754	0.30895	0.504743
2,25333333	1.31229	1.50113	1.22755	6.50331	6.35618	5.53749	1.73097	0.82655	1.241	1.8468	0.988063	1.54012	-0.01725	0.15439	0.202921	0.154195	0.303241	0.494414
2,25666667	1.31393	1.50686	1.23152	6.50848	6.35921	5.53986	1.73101	0.824627	1.23799	1.84433	0.98874	1.54238	-0.01797	0.154512	0.200395	0.154857	0.300216	0.504338
2,26	1.31587	1.51658	1.23591	6.51345	6.36789	5.54737	1.73266	0.827462	1.24072	1.84362	0.990644	1.53608	-0.01427	0.155924	0.201087	0.156169	0.296188	0.494417
2,26333333	1.31896	1.52043	1.24282	6.51929	6.37206	5.55304	1.73191	0.826151	1.24258	1.8424	0.988441	1.5432	-0.01232	0.155515	0.200263	0.156828	0.29377	0.50635
2,26666667	1.32602	1.52431	1.24844	6.52426	6.36901	5.56372	1.73237	0.827663	1.24422	1.84165	0.986749	1.54677	-0.01463	0.155658	0.203816	0.156408	0.293111	0.497094
2,27	1.33286	1.52896	1.25169	6.52594	6.37779	5.5664	1.73257	0.827417	1.24218	1.84135	0.987762	1.53622	-0.01256	0.15409	0.205303	0.155274	0.294556	0.501458
2,27333333	1.33965	1.53619	1.25846	6.5305	6.38984	5.58003	1.73328	0.828352	1.24415	1.84125	0.987845	1.54043	-0.01341	0.153632	0.207346	0.15362	0.297262	0.499729
2,27666667	1.34876	1.53854	1.25655	6.5339	6.38774	5.57792	1.73488	0.828508	1.24465	1.84145	0.984115	1.53883	-0.01408	0.152852	0.209517	0.152311	0.301392	0.500587
2,28	1.35346	1.54099	1.26215	6.53666	6.38994	5.59478	1.7379	0.829226	1.24484	1.84219	0.987999	1.538	-0.01402	0.152308	0.211471	0.152504	0.305805	0.502282
2,28333333	1.35416	1.54721	1.26684	6.5401	6.39314	5.59605	1.73874	0.8302	1.24202	1.84307	0.988634	1.54043	-0.01428	0.150483	0.210508	0.151697	0.310112	0.496043
2,28666667	1.35692	1.55233	1.27002	6.54507	6.39911	5.6038	1.73982	0.830032	1.24484	1.84416	0.990015	1.53941	-0.0158	0.151362	0.209888	0.150605	0.313287	0.503179
2,29	1.36228	1.55183	1.27847	6.54869	6.40266	5.61254	1.74133	0.829753	1.24216	1.84574	0.992207	1.53947	-0.0156	0.152673	0.209303	0.151862	0.312419	0.493236
2,29333333	1.36441	1.56291	1.28032	6.55147	6.40404	5.61931	1.74203	0.829185	1.24172	1.84554	0.988904	1.53941	-0.01423	0.151852	0.207605	0.151978	0.308072	0.502967
2,29666667	1.3701	1.55854	1.28511	6.55601	6.41059	5.624	1.74152	0.830548	1.24816	1.84755	0.992569	1.54102	-0.01444	0.150932	0.206355	0.151427	0.302159	0.491584
2,3	1.37753	1.57018	1.29045	6.55938	6.41894	5.62985	1.74033	0.827626	1.24492	1.84922	0.988488	1.53792	-0.01381	0.152659	0.206025	0.153635	0.29817	0.503175
2,30333333	1.38296	1.57233	1.29745	6.56189	6.41954	5.63322	1.74022	0.83252	1.24016	1.84847	0.988589	1.54156	-0.01409	0.154101	0.204804	0.155269	0.292454	0.494088
2,30666667	1.38841	1.5799	1.2974	6.56449	6.42375	5.64261	1.73829	0.831183	1.24375	1.84713	0.992145	1.53942	-0.01363	0.153129	0.206312	0.155382	0.29108	0.504602
2,31	1.39322	1.5829	1.30458	6.5671	6.42851	5.65407	1.73732	0.833646	1.2431	1.84687	0.989968	1.54082	-0.01544	0.154182	0.205786	0.156982	0.292716	0.496103
2,31333333	1.39778	1.58787	1.30283	6.56827	6.43406	5.65739	1.73774	0.832751	1.24104	1.84596	0.989465	1.54133	-0.01554	0.156469	0.206701	0.157725	0.2949	0.500553
2,31666667	1.40134	1.5894	1.31351	6.57106	6.4347	5.66394	1.7382	0.831409	1.24103	1.84589	0.986662	1.53887	-0.01528	0.15552	0.206934	0.156353	0.29633	0.498112
2,32	1.40815	1.59849	1.31241	6.57409	6.44435	5.67072	1.73805	0.831148	1.24737	1.84753	0.989333	1.53596	-0.0144	0.155535	0.208192	0.157063	0.301584	0.494913
2,32333333	1.41424	1.60365	1.31998	6.57693	6.44839	5.67477	1.73993	0.829557	1.23975	1.84958	0.991019	1.54263	-0.01576	0.156234	0.210459	0.155643	0.30538	0.495851
2,32666667	1.41838	1.60583	1.32302	6.58067	6.45113	5.68136	1.74094	0.835315	1.24179	1.84805	0.988853	1.54296	-0.01608	0.157145	0.21269	0.15517	0.308159	0.491336
2,33	1.42259	1.60723	1.32835	6.58476	6.44588	5.68966	1.74114	0.835131	1.24293	1.84779	0.996014	1.54346	-0.01782	0.157306	0.213856	0.152988	0.311478	0.499217
2,33333333	1.42604	1.61295	1.33254	6.58868	6.45549	5.6966	1.74242	0.83491	1.24685	1.84734	0.993573	1.53862	-0.01587	0.161073	0.214019	0.153867	0.312194	0.491435
2,33666667	1.42833	1.61793	1.33864	6.5925	6.45933	5.69809	1.74333	0.837176	1.24551	1.84675	0.991817	1.54023	-0.01577	0.162261	0.212404	0.153732	0.309279	0.503699
2,34	1.43299	1.62104	1.3442	6.59647	6.46211	5.70224	1.74356	0.82966	1.24548	1.84509	0.993547	1.54275	-0.01377	0.162569	0.210809	0.154397	0.304386	0.493954
2,34333333	1.43581	1.62407	1.34754	6.6	6.46675	5.71814	1.74256	0.836899	1.24182	1.84716	0.994345	1.54074	-0.01367	0.162831	0.210883	0.152664	0.301053	0.5056
2,34666667	1.43917	1.63108	1.35311	6.60296	6.46847	5.72026	1.742	0.833631	1.24475	1.84676	0.994205	1.54171	-0.01322	0.166684	0.209759	0.154314	0.295854	0.495217
2,35	1.44589	1.63605	1.3563	6.60594	6.47315	5.72611	1.74053	0.841188	1.2462	1.8468	0.995704	1.54305	-0.01373	0.169073	0.211125	0.154833	0.293573	0.501397
2,35333333	1.45091	1.63775	1.36058	6.60815	6.47902	5.73629	1.73946	0.835713	1.24438	1.84721	0.992533	1.53991	-0.01349	0.171887	0.212341	0.155733	0.293082	0.495444
2,35666667	1.45612	1.64681	1.36366	6.6109	6.4774	5.73526	1.73922	0.83975	1.24472	1.84875	0.992016	1.53655	-0.01232	0.178001	0.212393	0.15477	0.294978	0.494987
2,36	1.46374	1.64726	1.36767	6.61586	6.48524	5.74498	1.74101	0.834904	1.25069	1.84828	0.990993	1.5412	-0.01155	0.184334	0.211566	0.157668	0.295176	0.4943
2,36333333	1.47014	1.65156	1.36986	6.61966	6.48982	5.74929	1.74195	0.834224	1.24955	1.84849	0.989757	1.54056	-0.0089	0.187203	0.212787	0.157374	0.29865	0.489877
2,36666667	1.47557	1.66128	1.37832	6.62224	6.49026	5.75206	1.7441	0.839723	1.24731	1.84858	0.994202	1.54425	-0.01085	0.192009	0.212511	0.15623	0.300967	0.494235
2,37	1.48161	1.66225	1.38232	6.62603	6.49243	5.76085	1.74374	0.836983	1.24692	1.84805	0.989321	1.54128	-0.01254	0.197435	0.21137	0.154525	0.305051	0.48809
2,37333333	1.48561	1.66724	1.38767	6.62801	6.50093	5.76652	1.74487	0.834777	1.24189	1.84834	0.995585	1.53918	-0.01215	0.198754	0.211235	0.155773	0.310547	0.499128
2,37666667	1.49046	1.67	1.39275	6.62869	6.50277	5.7751	1.7457	0.837868	1.24609	1.84748	0.990342	1.54147	-0.01113	0.203199	0.212351	0.154192	0.31371	0.488387
2,38	1.49494	1.67345	1.39546	6.63004	6.49915	5.77558	1.74607	0.839154	1.24306	1.84856	0.997397	1.53549	-0.01224	0.20682	0.211908	0.154041	0.315911	0.496016
2,38333333	1.49917	1.68064	1.39777	6.6326	6.50782	5.78559	1.74576	0.832999	1.24638	1.84983	0.995715	1.53891	-0.01287	0.207456	0.209641	0.15447	0.315102	0.491457
2,38666667	1.50361	1.68718	1.40653	6.63545	6.51085	5.78953	1.74762	0.839394	1.24676	1.84961	0.993436	1.53791	-0.0126	0.209849	0.210612	0.155781	0.312459	0.492259
2,39	1.51	1.68936	1.40851	6.64063	6.51593	5.79351	1.74793	0.835988	1.24325	1.84794	0.996143	1.54466	-0.01271	0.217964	0.210458	0.155705	0.30535	0.490577
2,39333333	1.51487	1.69397	1.41479	6.64365	6.51384	5.7965	1.74689	0.839209	1.24275	1.84978	0.995169	1.54006	-0.01198	0.225128	0.208832	0.155475	0.299305	0.488277
2,39666667	1.51991	1.69756	1.41347	6.64596	6.51815	5.80654	1.74682	0.844039	1.24535	1.8488	0.996134	1.54335	-0.01116	0.233449	0.209558	0.156175	0.293405	0.494378
2,4	1.52292	1.70362	1.4217	6.64934	6.51803	5.81691	1.74591	0.839341	1.24666	1.84842	0.993904	1.54202	-0.00938	0.240102	0.211479	0.15679	0.29211	0.48692
2,40333333	1.52641	1.70989	1.42373	6.65232	6.52968	5.81468	1.74539	0.841401	1.24386	1.84795	0.993071	1.53681	-0.0064	0.244994	0.20979	0.158107	0.290187	0.494626
2,40666667	1.53087	1.71257	1.43315	6.65315	6.52739	5.81897	1.7453	0.838963	1.2446	1.849	0.994342	1.53607	-0.00511	0.249098	0.209073	0.15784	0.291728	0.485257
2,41	1.53653	1.71664	1.43394	6.65555	6.54049	5.82723	1.74415	0.840727	1.24703	1.84969	0.993087	1.54465	-0.0059	0.247264	0.210648	0.157829	0.295854	0.492016
2,41333333	1.54117	1.72015	1.43728	6.65942	6.54005	5.83179	1.74407	0.841167	1.24777	1.85073	0.995517	1.53754	-0.00657	0.243987	0.208908	0.157404	0.298668	0.487988
2,41666667	1.54643	1.72176	1.44243	6.66175	6.54539	5.83767	1.7463	0.837552	1.244	1.85111	0.994622	1.54011	-0.00704	0.246042	0.208071	0.15546	0.301549	0.489423
2,42	1.55082	1.73192	1.44988	6.66387	6.54497	5.83996	1.74761	0.837067	1.2448	1.85307	0.993589	1.54461	-0.00872	0.248257	0.209307	0.154193	0.306725	0.493167
2,42333333	1.55645	1.73334	1.45231	6.66808	6.55023	5.84496	1.74748	0.838884	1.24598	1.85474	0.990134	1.53718	-0.01128	0.250684	0.206756	0.154506	0.311153	0.490724
2,42666667	1.55781	1.73653	1.45694	6.67056	6.54833	5.8543	1.7496	0.841461	1.24488	1.8549	0.993509	1.53777	-0.00967	0.256973	0.204215	0.154696	0.313254	0.498782
2,43	1.55999	1.73877	1.46336	6.67274	6.55529	5.85724	1.74954	0.839952	1.25164	1.85534	0.996388	1.5437	-0.00888	0.264502	0.203059	0.15459	0.317023	0.488793
2,43333333	1.56553	1.74846	1.46504	6.67649	6.55517	5.86181	1.74971	0.836658	1.24619	1.85562	0.997612	1.54193	-0.00829	0.270062	0.202833	0.154866	0.318416	0.499937
2,43666667	1.56966	1.74985	1.47036	6.67897	6.56349	5.86496	1.74938	0.839807	1.24804	1.85497	0.994268	1.54168	-0.00672	0.276355	0.203137	0.155096	0.317561	0.48842
2,44	1.57473	1.75153	1.47671	6.68037	6.5638	5.87079	1.74966	0.838757	1.24707	1.85271	0.996767	1.5396	-0.0055	0.278893	0.205055	0.155639	0.316835	0.499822
2,44333333	1.58133	1.75933	1.47969	6.68376	6.56304	5.8757	1.74972	0.846337	1.24577	1.85116	0.996011	1.54015	-0.00586	0.278397	0.205242	0.155825	0.315638	0.491016
2,44666667	1.58717	1.76455	1.48298	6.68608	6.56752	5.88235	1.75005	0.836581	1.24703	1.85055	0.995966	1.53989	-0.00539	0.279766	0.206052	0.155983	0.313062	0.495842
2,45	1.59134	1.76326	1.4859	6.68735	6.57469	5.88254	1.75033	0.839217	1.2489	1.85004	0.999684	1.53622	-0.00462	0.277613	0.206345	0.156536	0.309223	0.494244
2,45333333	1.59716	1.77401	1.4893	6.69015	6.57302	5.88666	1.75124	0.839757	1.24396	1.84787	0.996921	1.539	-0.00528	0.273666	0.206169	0.157568	0.304152	0.492115
2,45666667	1.60173	1.77796	1.49731	6.6939	6.57621	5.89696	1.75202	0.837446	1.25104	1.84864	0.994889	1.5379	-0.00584	0.270878	0.204746	0.15702	0.298471	0.493941
2,46	1.60461	1.77975	1.50409	6.69458	6.58162	5.89777	1.75229	0.841589	1.24512	1.84919	0.997005	1.54605	-0.00591	0.2745	0.20328	0.157949	0.295573	0.488081
2,46333333	1.60928	1.78351	1.50434	6.69846	6.58196	5.9036	1.75297	0.842186	1.24614	1.84651	0.99822	1.54184	-0.00616	0.277785	0.20482	0.159372	0.293433	0.497056
2,46666667	1.61551	1.78784	1.51464	6.70004	6.58495	5.907	1.7524	0.839763	1.24676	1.84487	0.993955	1.53846	-0.0068	0.281927	0.205442	0.159776	0.292631	0.486813
2,47	1.62027	1.79296	1.50954	6.70128	6.58982	5.91026	1.7522	0.840449	1.24704	1.84656	0.993863	1.53768	-0.00559	0.286824	0.204876	0.158503	0.294521	0.496395
2,47333333	1.62528	1.79601	1.51577	6.70472	6.59375	5.91825	1.7515	0.838	1.24616	1.84564	0.996291	1.5407	-0.00545	0.291206	0.206487	0.159347	0.297305	0.486541
2,47666667	1.63019	1.80872	1.51879	6.70717	6.59113	5.92416	1.75256	0.840909	1.24629	1.8464	0.998339	1.54146	-0.00538	0.289308	0.208184	0.15819	0.300923	0.493866
2,48	1.63549	1.80705	1.52986	6.70869	6.60279	5.92224	1.75209	0.844688	1.24731	1.84754	1.00013	1.53654	-0.00449	0.285177	0.206235	0.155703	0.304425	0.487398
2,48333333	1.64127	1.80879	1.53105	6.71196	6.60151	5.93565	1.75197	0.847153	1.24516	1.8483	0.995815	1.53657	-0.00442	0.285181	0.205887	0.155095	0.309316	0.488827
2,48666667	1.64668	1.81671	1.54041	6.71563	6.60259	5.93429	1.75237	0.842756	1.24208	1.8487	0.996076	1.5418	-0.00483	0.28196	0.203602	0.15494	0.31369	0.491282
2,49	1.65115	1.81546	1.54135	6.7179	6.60654	5.93979	1.75341	0.842017	1.24614	1.84932	0.997491	1.53907	-0.00505	0.282364	0.204487	0.154775	0.316397	0.487119
2,49333333	1.65757	1.82247	1.54743	6.72136	6.60797	5.94618	1.75218	0.843549	1.24673	1.84865	0.997661	1.54467	-0.0044	0.282262	0.203295	0.155248	0.316484	0.49351
2,49666667	1.66481	1.83337	1.54782	6.72331	6.60726	5.95082	1.75154	0.843866	1.24701	1.84892	0.99844	1.5387	-0.00583	0.284098	0.203786	0.156412	0.315899	0.48731
2,5	1.66668	1.83213	1.55607	6.72635	6.61298	5.95575	1.75295	0.84663	1.24393	1.84998	1.00154	1.53696	-0.006	0.279147	0.203861	0.156758	0.314135	0.497745
2,50333333	1.6723	1.83775	1.55926	6.72673	6.60715	5.9616	1.75336	0.848302	1.24404	1.84995	1.00176	1.53968	-0.00752	0.276129	0.207277	0.157696	0.310539	0.486259
2,50666667	1.67728	1.8433	1.56487	6.72815	6.61957	5.96051	1.75411	0.846438	1.25072	1.85094	0.998687	1.53703	-0.00791	0.265443	0.206967	0.1589	0.307168	0.497668
2,51	1.68171	1.85068	1.56564	6.73078	6.62089	5.96443	1.75473	0.843689	1.24632	1.85302	1.00057	1.53812	-0.0075	0.257785	0.209697	0.16064	0.302532	0.490951
2,51333333	1.68397	1.8497	1.57302	6.73288	6.627	5.9627	1.75551	0.843938	1.24699	1.8545	1.00171	1.5404	-0.00625	0.254109	0.208773	0.161916	0.298676	0.495193
2,51666667	1.68959	1.85259	1.57329	6.73436	6.62676	5.97129	1.75383	0.844623	1.25008	1.85431	1.00156	1.53886	-0.00445	0.251181	0.205631	0.163088	0.294044	0.492983
2,52	1.69237	1.86077	1.57643	6.73756	6.63222	5.9786	1.75417	0.844235	1.2436	1.85399	0.99586	1.53617	-0.00326	0.252463	0.20389	0.16201	0.291693	0.491499
2,52333333	1.69927	1.86311	1.5844	6.74072	6.63704	5.98388	1.75219	0.848184	1.24444	1.85342	0.996555	1.54059	-0.00316	0.256365	0.203542	0.161542	0.290044	0.494594
2,52666667	1.70461	1.87084	1.58534	6.74182	6.63454	5.98337	1.75105	0.84641	1.24623	1.85125	0.996611	1.54268	-0.00388	0.261457	0.201869	0.159996	0.289718	0.487198
2,53	1.70862	1.87605	1.59742	6.74431	6.64258	5.99374	1.75145	0.844348	1.24571	1.85075	0.99609	1.537	-0.00526	0.261478	0.203099	0.157725	0.289624	0.492817
2,53333333	1.71402	1.87869	1.60122	6.74579	6.64008	5.99164	1.7516	0.847656	1.244	1.85102	1.00384	1.54153	-0.00623	0.262488	0.20597	0.156565	0.292049	0.487749
2,53666667	1.71966	1.87978	1.60058	6.74795	6.64321	6.00191	1.75162	0.847404	1.24949	1.85152	0.997133	1.54147	-0.00725	0.260126	0.205981	0.157857	0.293229	0.493011
2,54	1.72457	1.88847	1.60789	6.74979	6.64977	6.00032	1.7541	0.847732	1.24467	1.85251	0.998146	1.53461	-0.00692	0.254563	0.204304	0.158646	0.296199	0.487209
2,54333333	1.72711	1.88549	1.60971	6.75264	6.65024	6.00233	1.75672	0.84967	1.24802	1.85255	0.999983	1.54197	-0.0065	0.254264	0.203959	0.15745	0.300321	0.490181
2,54666667	1.73352	1.89512	1.61618	6.75392	6.64892	6.00666	1.7581	0.847506	1.25105	1.85223	1.00047	1.54571	-0.00666	0.254232	0.206307	0.157999	0.304224	0.493475
2,55	1.73696	1.90152	1.62096	6.75579	6.65372	6.01534	1.75916	0.84842	1.24888	1.85137	0.997149	1.54075	-0.00736	0.251164	0.207351	0.159	0.307865	0.486878
2,55333333	1.74289	1.90399	1.63023	6.75699	6.65469	6.01574	1.75851	0.842502	1.24489	1.85088	1.00159	1.53947	-0.00519	0.253711	0.208043	0.159195	0.311607	0.493157
2,55666667	1.74893	1.90351	1.62914	6.75872	6.66417	6.01437	1.75687	0.849519	1.24711	1.85182	1.00009	1.54375	-0.0039	0.259	0.21208	0.157768	0.314795	0.486557
2,56	1.75697	1.91205	1.6328	6.75934	6.65961	6.02158	1.75643	0.850876	1.24848	1.85419	1.00244	1.54061	-0.00516	0.257334	0.212845	0.158881	0.31588	0.493429
2,56333333	1.76015	1.91392	1.63342	6.76172	6.65957	6.02818	1.75622	0.844995	1.24831	1.85542	0.997009	1.54046	-0.00329	0.256352	0.212469	0.159275	0.316635	0.485732
2,56666667	1.76507	1.92193	1.6423	6.7646	6.66684	6.03091	1.75562	0.848639	1.24915	1.85605	0.997795	1.54104	-0.00195	0.259621	0.210889	0.159892	0.316529	0.489135
2,57	1.76932	1.92216	1.64687	6.76737	6.66631	6.0441	1.75635	0.844657	1.24486	1.8558	1.00083	1.53931	-0.00356	0.258521	0.210429	0.158372	0.315388	0.489287
2,57333333	1.7737	1.92843	1.65254	6.77055	6.67222	6.04237	1.75776	0.844561	1.24315	1.85598	0.997654	1.53571	-0.00409	0.258185	0.208995	0.159006	0.312788	0.48635
2,57666667	1.77492	1.93315	1.65809	6.77544	6.67329	6.04712	1.75781	0.850371	1.24793	1.85556	0.998203	1.53855	-0.00512	0.256263	0.209287	0.159127	0.310557	0.489505
2,58	1.77954	1.93494	1.6649	6.77698	6.67342	6.04671	1.75812	0.847068	1.24802	1.85603	0.995901	1.53878	-0.00639	0.254037	0.208076	0.160371	0.308739	0.485827
2,58333333	1.78313	1.94335	1.66833	6.77858	6.68135	6.05517	1.76026	0.846012	1.24796	1.85663	1.00106	1.54018	-0.00773	0.251916	0.206752	0.160181	0.305242	0.492032
2,58666667	1.78626	1.94387	1.67518	6.77984	6.68227	6.0535	1.76031	0.850043	1.24676	1.85699	1.00185	1.54026	-0.00845	0.25017	0.20719	0.161188	0.302441	0.487425
2,59	1.7885	1.94839	1.67001	6.78139	6.68188	6.05706	1.76126	0.846337	1.24721	1.85571	0.998661	1.53959	-0.0078	0.246159	0.205339	0.160231	0.29879	0.491773
2,59333333	1.79521	1.95196	1.67377	6.78098	6.68633	6.06174	1.76179	0.846219	1.24568	1.85589	1.00087	1.54129	-0.00677	0.245853	0.203801	0.159367	0.294812	0.491748
2,59666667	1.80017	1.95791	1.68717	6.78363	6.68523	6.06513	1.7614	0.849786	1.24284	1.8551	1.00112	1.54166	-0.00703	0.244869	0.20397	0.158514	0.292796	0.487439
2,6	1.80603	1.96227	1.68624	6.78528	6.69031	6.06433	1.75988	0.8488	1.24535	1.85386	1.00375	1.53693	-0.00593	0.240798	0.205638	0.15746	0.290793	0.491805
2,60333333	1.81036	1.9673	1.6944	6.78838	6.6901	6.07418	1.7601	0.850037	1.2467	1.85204	0.998709	1.53627	-0.00639	0.239596	0.205492	0.157102	0.291511	0.48492
2,60666667	1.81845	1.96898	1.6964	6.78955	6.69574	6.07167	1.75917	0.851012	1.23927	1.85367	1.00712	1.54128	-0.00697	0.239825	0.207843	0.156552	0.293202	0.492409
2,61	1.82294	1.97404	1.69897	6.79229	6.69917	6.07282	1.75849	0.852308	1.24762	1.85301	1.00183	1.54248	-0.00647	0.238171	0.209644	0.156711	0.295422	0.483352
2,61333333	1.82887	1.9765	1.70721	6.7941	6.69951	6.08388	1.75895	0.851362	1.24563	1.85489	0.995287	1.53511	-0.00595	0.234808	0.20966	0.158106	0.295783	0.489967
2,61666667	1.83513	1.98428	1.71173	6.79664	6.70073	6.08657	1.76029	0.850448	1.24268	1.85538	1.00004	1.53806	-0.01021	0.234503	0.207938	0.157085	0.298164	0.486721
2,62	1.84237	1.98892	1.71284	6.79841	6.70164	6.08972	1.76128	0.850163	1.2458	1.85848	1.00071	1.53961	-0.00873	0.230511	0.206611	0.156694	0.298125	0.486104
2,62333333	1.84728	1.99084	1.71459	6.80299	6.71068	6.09524	1.76239	0.847841	1.24804	1.85807	1.00384	1.54326	-0.00986	0.225829	0.205455	0.158841	0.298648	0.488021
2,62666667	1.85391	1.99749	1.72253	6.8033	6.703	6.09403	1.76392	0.850523	1.24693	1.85872	1.00267	1.53556	-0.01119	0.224716	0.204687	0.159838	0.300362	0.484656
2,63	1.85899	2.00192	1.7286	6.80449	6.70931	6.09647	1.76411	0.853319	1.25174	1.85758	1.00301	1.53638	-0.01058	0.225963	0.204501	0.158982	0.302791	0.489652
2,63333333	1.86414	2.00434	1.73475	6.80689	6.71415	6.10282	1.76447	0.849573	1.25064	1.85495	1.00398	1.54374	-0.00608	0.224456	0.206384	0.159574	0.304479	0.480211
2,63666667	1.8679	2.00872	1.73854	6.80889	6.71475	6.10608	1.76426	0.849488	1.24526	1.8577	1.00159	1.54043	-0.00553	0.224064	0.207319	0.160608	0.306558	0.48659
2,64	1.87382	2.01792	1.73988	6.80818	6.71539	6.10747	1.76385	0.850785	1.24739	1.85548	1.00053	1.54214	-0.00618	0.226372	0.207405	0.160448	0.310028	0.481703
2,64333333	1.87862	2.01695	1.7474	6.81256	6.71636	6.10874	1.76354	0.850508	1.24406	1.85743	1.00296	1.53895	-0.00504	0.223715	0.206355	0.161258	0.312076	0.485149
2,64666667	1.88466	2.02902	1.74853	6.81514	6.72253	6.11396	1.76335	0.851024	1.24783	1.85663	1.0005	1.54227	-0.00609	0.221652	0.206126	0.161177	0.313218	0.485146
2,65	1.88907	2.02768	1.75536	6.81592	6.72349	6.12091	1.7646	0.852979	1.24676	1.85964	0.997949	1.54388	-0.0091	0.223106	0.206538	0.161492	0.313821	0.482057
2,65333333	1.89429	2.03298	1.75602	6.81899	6.72759	6.12558	1.76524	0.851186	1.24754	1.85768	0.998176	1.53943	-0.00902	0.219834	0.206358	0.160126	0.31504	0.489527
2,65666667	1.8988	2.04021	1.76557	6.82198	6.72961	6.12593	1.76786	0.853044	1.25092	1.85957	1.00345	1.53988	-0.00839	0.217003	0.204904	0.16027	0.316362	0.480712
2,66	1.90351	2.03721	1.76546	6.82224	6.73412	6.12875	1.76818	0.850128	1.24406	1.85645	1.00428	1.53821	-0.00843	0.216266	0.206172	0.159241	0.317113	0.489122
2,66333333	1.90728	2.04732	1.77018	6.82543	6.73282	6.12661	1.77058	0.853415	1.24787	1.85653	1.00127	1.5413	-0.00809	0.214319	0.205495	0.159212	0.316618	0.481844
2,66666667	1.91189	2.04762	1.77532	6.82713	6.73536	6.13525	1.77035	0.848665	1.24559	1.85717	1.00294	1.54032	-0.0069	0.210739	0.205606	0.159917	0.317857	0.492572
2,67	1.91554	2.05821	1.78036	6.82745	6.73916	6.13302	1.77023	0.852059	1.24498	1.85511	1.00855	1.5357	-0.00777	0.210595	0.207526	0.162715	0.317773	0.485348
2,67333333	1.9216	2.05714	1.78762	6.82815	6.73869	6.13949	1.76979	0.849505	1.24245	1.85395	1.00442	1.54654	-0.00669	0.210478	0.208844	0.162181	0.313834	0.49038
2,67666667	1.92621	2.06574	1.78992	6.82961	6.74142	6.14506	1.76938	0.851783	1.2519	1.85472	1.0043	1.54154	-0.00726	0.20889	0.210164	0.164303	0.310248	0.486946
2,68	1.93074	2.06526	1.79287	6.8291	6.74524	6.14386	1.76829	0.852311	1.24736	1.85648	1.00514	1.5403	-0.00887	0.206561	0.210537	0.163503	0.308893	0.485635
2,68333333	1.93291	2.07358	1.79502	6.83013	6.7479	6.14801	1.768	0.850858	1.24942	1.85655	1.00659	1.5379	-0.00897	0.206685	0.208945	0.163016	0.306574	0.488416
2,68666667	1.93907	2.07421	1.8041	6.83073	6.74525	6.14853	1.76815	0.855314	1.24552	1.85653	0.999564	1.53466	-0.00822	0.2058	0.205235	0.160911	0.303209	0.482701
2,69	1.94396	2.07951	1.8066	6.83399	6.74702	6.15438	1.76618	0.855439	1.24278	1.85868	1.00455	1.53834	-0.00684	0.205098	0.205199	0.160949	0.30165	0.490474
2,69333333	1.94805	2.08229	1.80994	6.83621	6.75292	6.15414	1.76612	0.848667	1.2456	1.85813	1.00438	1.54323	-0.00724	0.202747	0.202412	0.159112	0.302395	0.479653
2,69666667	1.95182	2.08975	1.81085	6.83932	6.75318	6.15903	1.7665	0.851651	1.2451	1.8568	1.00182	1.53981	-0.00689	0.202652	0.204801	0.158982	0.299482	0.4897
2,7	1.95807	2.0929	1.81721	6.84262	6.7581	6.16747	1.76618	0.855986	1.24462	1.85719	1.00387	1.538	-0.00632	0.198818	0.205189	0.159526	0.297745	0.479601
2,70333333	1.96186	2.09512	1.82892	6.8452	6.75643	6.17112	1.76617	0.853089	1.24476	1.85844	1.00297	1.5406	-0.00523	0.196965	0.208812	0.160336	0.297307	0.487719
2,70666667	1.96686	2.0999	1.82733	6.84571	6.75985	6.1669	1.76719	0.856626	1.24431	1.85623	0.996454	1.54328	-0.00693	0.195337	0.209606	0.1606	0.296108	0.480303
2,71	1.96949	2.10314	1.83165	6.84711	6.76129	6.1707	1.76795	0.852995	1.24448	1.85616	1.00504	1.53735	-0.00668	0.196743	0.212019	0.158988	0.29348	0.488933
2,71333333	1.97417	2.11125	1.83506	6.84748	6.76819	6.17672	1.76806	0.85528	1.24242	1.85614	1.0116	1.54261	-0.00397	0.194855	0.208888	0.159956	0.293274	0.484113
2,71666667	1.9789	2.11214	1.84651	6.8486	6.76821	6.17988	1.7679	0.853318	1.25103	1.85648	1.00258	1.53743	-0.00326	0.195772	0.208221	0.159395	0.291473	0.485339
2,72	1.98514	2.12103	1.8494	6.85084	6.77252	6.17819	1.76842	0.854655	1.24307	1.85692	1.00809	1.54061	-0.00439	0.197091	0.206509	0.158026	0.29051	0.486236
2,72333333	1.98795	2.12629	1.85209	6.85348	6.76865	6.1797	1.76966	0.853958	1.24941	1.85691	1.01187	1.53637	-0.0057	0.195081	0.20476	0.158222	0.289819	0.484683
2,72666667	1.99424	2.12175	1.85172	6.85609	6.77677	6.18592	1.77042	0.852907	1.24746	1.85764	1.00329	1.53864	-0.00413	0.191784	0.203288	0.161571	0.289033	0.4881
2,73	1.99959	2.12722	1.86141	6.85805	6.77401	6.18591	1.76964	0.852811	1.25156	1.85876	1.00621	1.54264	-0.00667	0.191711	0.205197	0.161873	0.288835	0.480329
2,73333333	2.00419	2.13542	1.86247	6.8597	6.77886	6.18511	1.77098	0.859756	1.24469	1.85767	1.00279	1.54041	-0.00919	0.191437	0.206814	0.162781	0.289094	0.490131
2,73666667	2.00767	2.14165	1.86889	6.86102	6.78295	6.19206	1.76977	0.855278	1.24849	1.85709	1.00404	1.54185	-0.01105	0.188892	0.206634	0.162153	0.288978	0.479626
2,74	2.01486	2.15115	1.87188	6.86296	6.7809	6.20085	1.76786	0.853189	1.24863	1.85849	1.00579	1.53814	-0.00875	0.189215	0.207366	0.16183	0.290224	0.488905
2,74333333	2.01891	2.15065	1.87836	6.86505	6.78226	6.19968	1.76634	0.85633	1.24326	1.85646	1.00548	1.53924	-0.00968	0.18855	0.208679	0.160576	0.292746	0.477833
2,74666667	2.02343	2.15312	1.88003	6.8664	6.78606	6.20375	1.76629	0.858378	1.2433	1.85637	1.00302	1.54598	-0.00866	0.187951	0.207723	0.161326	0.294995	0.491842
2,75	2.02667	2.15414	1.88396	6.86743	6.79384	6.20244	1.76603	0.854847	1.24822	1.85475	1.0016	1.541	-0.00842	0.187447	0.207367	0.162265	0.297963	0.480088
2,75333333	2.0312	2.15988	1.88923	6.8687	6.78887	6.20773	1.76669	0.855112	1.2446	1.85522	1.00374	1.53665	-0.00628	0.186467	0.207164	0.163945	0.300939	0.488569
2,75666667	2.03528	2.15779	1.89188	6.8695	6.78791	6.20655	1.76869	0.855633	1.24268	1.85583	1.00711	1.53835	-0.00766	0.184169	0.208079	0.164733	0.302788	0.478525
2,76	2.04415	2.16524	1.89446	6.87047	6.79534	6.21708	1.7705	0.854281	1.2457	1.8596	1.00714	1.54222	-0.00738	0.183748	0.207487	0.162704	0.303781	0.485926
2,76333333	2.05036	2.17391	1.90423	6.87284	6.79714	6.21638	1.77116	0.854023	1.24462	1.85886	1.01159	1.54298	-0.00815	0.18242	0.207358	0.161166	0.304769	0.47696
2,76666667	2.05832	2.17443	1.90878	6.87601	6.79744	6.21858	1.77131	0.855302	1.24702	1.86087	1.00641	1.53834	-0.00752	0.17823	0.207105	0.160911	0.304761	0.478064
2,77	2.06428	2.1771	1.91226	6.87825	6.80248	6.2204	1.77313	0.853696	1.24501	1.86165	1.00994	1.54028	-0.00798	0.178859	0.206599	0.159969	0.305257	0.480975
2,77333333	2.0694	2.18243	1.91812	6.88119	6.79862	6.22054	1.77214	0.855924	1.247	1.85996	1.00802	1.5393	-0.00763	0.179448	0.206979	0.158589	0.306062	0.478225
2,77666667	2.07294	2.18897	1.92561	6.88333	6.80295	6.22561	1.77163	0.853917	1.24677	1.85981	1.00297	1.54348	-0.0084	0.179829	0.206514	0.160324	0.307986	0.484495
2,78	2.0777	2.19248	1.92864	6.88467	6.80412	6.22502	1.77232	0.853071	1.24403	1.8593	1.00841	1.53946	-0.00794	0.178657	0.206373	0.161719	0.308729	0.477664
2,78333333	2.08126	2.19529	1.93249	6.88512	6.80951	6.23446	1.7727	0.858739	1.24424	1.85989	1.00999	1.5403	-0.00872	0.182183	0.207158	0.159934	0.310382	0.487737
2,78666667	2.08437	2.20384	1.93353	6.88628	6.80879	6.23047	1.77159	0.857323	1.24641	1.85895	1.00755	1.54012	-0.00815	0.178071	0.208766	0.162649	0.311906	0.476414
2,79	2.09104	2.20504	1.93982	6.88576	6.81292	6.23532	1.77101	0.857226	1.24434	1.86177	1.00253	1.54051	-0.0087	0.178142	0.208409	0.162093	0.313102	0.48915
2,79333333	2.09642	2.21078	1.93877	6.88508	6.81305	6.23468	1.77105	0.856484	1.25008	1.86072	1.00969	1.53844	-0.00863	0.176474	0.20915	0.162232	0.314447	0.475833
2,79666667	2.09886	2.21808	1.94944	6.88616	6.81542	6.23877	1.77179	0.857285	1.24343	1.86107	1.00903	1.54282	-0.00931	0.17854	0.210075	0.161834	0.315079	0.485169
2,8	2.10435	2.21755	1.9491	6.88809	6.81842	6.24711	1.77116	0.854952	1.24627	1.86048	1.00909	1.53758	-0.0059	0.176792	0.210477	0.162761	0.315437	0.479027
2,80333333	2.1094	2.22416	1.95387	6.88916	6.81873	6.24351	1.76979	0.855995	1.24208	1.85998	1.01028	1.54328	-0.00802	0.178143	0.209254	0.162486	0.315702	0.482478
2,80666667	2.11234	2.22292	1.95978	6.89374	6.82451	6.25019	1.77059	0.853818	1.24594	1.85765	1.0101	1.54099	-0.0072	0.175818	0.210517	0.16257	0.316912	0.478743
2,81	2.11535	2.22823	1.96124	6.89693	6.82123	6.25368	1.77101	0.856514	1.24305	1.85814	1.00713	1.53607	-0.00744	0.175956	0.209694	0.164209	0.315421	0.479742
2,81333333	2.1224	2.23965	1.97179	6.89877	6.8223	6.25338	1.77052	0.855487	1.2415	1.85877	1.00653	1.53866	-0.00667	0.174489	0.209519	0.164201	0.316072	0.484892
2,81666667	2.12625	2.23991	1.97593	6.89997	6.82791	6.25778	1.7706	0.855838	1.24652	1.85914	1.00932	1.53764	-0.00857	0.174694	0.208451	0.164772	0.316424	0.478098
2,82	2.13195	2.24304	1.97956	6.90173	6.82805	6.25625	1.77325	0.860531	1.24321	1.85881	1.01093	1.54115	-0.00542	0.173004	0.208534	0.163724	0.31583	0.4868
2,82333333	2.13719	2.25116	1.9803	6.90182	6.83129	6.2625	1.77314	0.853216	1.24367	1.85935	1.00703	1.54359	-0.00678	0.172228	0.206432	0.164538	0.315504	0.477275
2,82666667	2.14305	2.25621	1.98397	6.90354	6.83315	6.26164	1.77329	0.856224	1.24673	1.85865	1.00716	1.54179	-0.00534	0.171239	0.206806	0.163202	0.316396	0.485832
2,83	2.14634	2.25608	1.98837	6.90565	6.83301	6.26017	1.77237	0.856352	1.24368	1.85897	1.01229	1.54295	-0.00537	0.170111	0.206001	0.163597	0.316267	0.477849
2,83333333	2.15194	2.25774	1.99321	6.90751	6.8369	6.2679	1.77316	0.858784	1.24286	1.85892	1.01113	1.54377	-0.00405	0.169195	0.20653	0.162098	0.315321	0.482921
2,83666667	2.15624	2.26206	1.99924	6.90985	6.83531	6.26554	1.7707	0.857207	1.24464	1.85976	1.00713	1.53999	-0.00608	0.170845	0.205683	0.161604	0.314539	0.480224
2,84	2.16051	2.26747	2.00468	6.91281	6.83807	6.27044	1.77062	0.857846	1.24051	1.8596	1.00801	1.5388	-0.00388	0.172534	0.206415	0.163238	0.313213	0.480919
2,84333333	2.16522	2.27251	2.00811	6.91375	6.84428	6.27106	1.77055	0.858458	1.24432	1.85913	1.00957	1.54146	-0.00439	0.17446	0.206264	0.162399	0.311134	0.482466
2,84666667	2.16951	2.27306	2.01431	6.9149	6.8447	6.27468	1.77118	0.854783	1.24776	1.85938	1.00753	1.53867	-0.00289	0.174712	0.207972	0.162222	0.310983	0.474732
2,85	2.17304	2.28075	2.01564	6.91674	6.84627	6.27966	1.77033	0.859711	1.24624	1.85973	1.00722	1.54035	-0.00366	0.176677	0.207791	0.165566	0.309949	0.480798
2,85333333	2.17725	2.28615	2.02332	6.91743	6.8386	6.28027	1.77224	0.855841	1.2472	1.8598	1.00729	1.54059	-0.00445	0.176561	0.209982	0.166403	0.30853	0.474246
2,85666667	2.18249	2.29326	2.02384	6.91853	6.84595	6.28671	1.77437	0.861358	1.24375	1.85914	1.01122	1.54215	-0.00802	0.175068	0.208712	0.165636	0.307413	0.481171
2,86	2.18649	2.29351	2.03403	6.91943	6.84669	6.28474	1.77565	0.859952	1.24594	1.85963	1.01021	1.54259	-0.00725	0.172846	0.209159	0.167024	0.307224	0.477086
2,86333333	2.19352	2.29733	2.03336	6.92062	6.85248	6.28735	1.77601	0.856181	1.24733	1.85966	1.00873	1.54099	-0.00702	0.171189	0.207927	0.166788	0.306492	0.481478
2,86666667	2.20073	2.30382	2.04406	6.92082	6.85182	6.29099	1.77745	0.857872	1.24577	1.86155	1.01266	1.54091	-0.00794	0.165751	0.207633	0.16419	0.307258	0.481259
2,87	2.20741	2.30465	2.04836	6.92393	6.85912	6.29113	1.77721	0.857456	1.2426	1.86224	1.01266	1.53848	-0.00647	0.167913	0.208996	0.162667	0.309692	0.4782
2,87333333	2.21201	2.3056	2.04642	6.92625	6.85993	6.29441	1.77643	0.859919	1.24475	1.86174	1.01076	1.54145	-0.00429	0.168505	0.210915	0.163312	0.31132	0.483779
2,87666667	2.21808	2.31556	2.05353	6.92971	6.86166	6.2966	1.7757	0.857165	1.24689	1.86108	1.00825	1.54013	-0.00463	0.168663	0.211015	0.163044	0.312459	0.474454
2,88	2.22227	2.31765	2.05701	6.93168	6.85801	6.30387	1.77722	0.862732	1.24023	1.86261	1.00946	1.5424	-0.00644	0.17219	0.210432	0.164088	0.312733	0.483254
2,88333333	2.22583	2.32677	2.06018	6.93414	6.86189	6.2946	1.77725	0.857583	1.24198	1.8607	1.01148	1.54064	-0.00567	0.174732	0.21046	0.164353	0.313929	0.475458
2,88666667	2.23015	2.32692	2.06375	6.9339	6.86627	6.30457	1.77875	0.859307	1.24119	1.85963	1.01099	1.54178	-0.00696	0.173169	0.207137	0.16566	0.313316	0.482629
2,89	2.23599	2.33124	2.07262	6.93512	6.86425	6.30764	1.78024	0.858544	1.24539	1.86206	1.01059	1.53897	-0.00702	0.17301	0.20564	0.165536	0.313843	0.478372
2,89333333	2.24122	2.33435	2.07333	6.93531	6.86779	6.30264	1.78105	0.86113	1.25025	1.86356	1.00933	1.53811	-0.00821	0.174343	0.204813	0.165492	0.313747	0.480581
2,89666667	2.24611	2.33643	2.08367	6.93745	6.86667	6.31071	1.78063	0.862467	1.24405	1.86287	1.00941	1.54157	-0.00597	0.172017	0.205262	0.165082	0.313731	0.48158
2,9	2.24897	2.34211	2.085	6.93928	6.87266	6.31592	1.78037	0.857887	1.24662	1.86411	1.00663	1.54037	-0.00649	0.171611	0.205821	0.165781	0.314329	0.477711
2,90333333	2.25237	2.34585	2.08545	6.94087	6.87777	6.31662	1.78037	0.8576	1.24768	1.86637	1.00655	1.54142	-0.00742	0.172156	0.206919	0.165895	0.314271	0.483287
2,90666667	2.25711	2.35327	2.08937	6.94297	6.87713	6.31863	1.78086	0.85888	1.24402	1.86597	1.00844	1.5385	-0.00793	0.170958	0.207877	0.16525	0.31358	0.475272
2,91	2.25856	2.3578	2.10193	6.94472	6.8791	6.31554	1.78049	0.857844	1.24443	1.86357	1.00972	1.53921	-0.00852	0.168249	0.207838	0.164736	0.313182	0.483291
2,91333333	2.262	2.35771	2.09756	6.94636	6.87962	6.31833	1.78054	0.860012	1.24377	1.86357	1.00936	1.53923	-0.00912	0.168401	0.209162	0.164081	0.313771	0.476977
2,91666667	2.26796	2.3656	2.1028	6.94819	6.87815	6.31838	1.7809	0.863488	1.24505	1.86203	1.01439	1.54066	-0.00788	0.168599	0.207419	0.163651	0.313034	0.480758
2,92	2.2745	2.3664	2.10451	6.94973	6.88057	6.32543	1.78054	0.862268	1.23924	1.86051	1.01235	1.53891	-0.00517	0.167077	0.207148	0.165333	0.313314	0.477298
2,92333333	2.27871	2.37407	2.11833	6.95121	6.88503	6.32888	1.77854	0.862955	1.24536	1.86164	1.01306	1.54002	-0.00575	0.168169	0.207202	0.164658	0.313814	0.47675
2,92666667	2.28681	2.37737	2.12004	6.95157	6.88526	6.33029	1.77932	0.860433	1.24497	1.86362	1.01254	1.54224	-0.00569	0.171295	0.207223	0.164902	0.314293	0.477951
2,93	2.29144	2.37477	2.11983	6.95192	6.89066	6.33551	1.78027	0.859609	1.24291	1.86116	1.01364	1.54235	-0.00783	0.17132	0.205819	0.163813	0.313671	0.472293
2,93333333	2.29769	2.38174	2.12468	6.95365	6.88827	6.33295	1.77969	0.863407	1.243	1.86127	1.01284	1.54181	-0.00819	0.173306	0.207409	0.165047	0.313344	0.478924
2,93666667	2.30199	2.38673	2.1375	6.95607	6.88512	6.33272	1.78007	0.859589	1.24566	1.8629	1.0121	1.54047	-0.00636	0.175694	0.208294	0.163717	0.313237	0.473763
2,94	2.30751	2.3935	2.13767	6.95717	6.8951	6.33452	1.78103	0.857255	1.24263	1.86231	1.00829	1.53942	-0.00295	0.175925	0.208228	0.166113	0.312339	0.476278
2,94333333	2.31206	2.39322	2.14013	6.95902	6.88968	6.33405	1.78006	0.861286	1.24266	1.86004	1.00887	1.54192	-0.00119	0.176293	0.208306	0.164948	0.313204	0.475913
2,94666667	2.3183	2.39828	2.14313	6.96001	6.89512	6.34035	1.77888	0.859923	1.24616	1.86211	1.00938	1.53901	-0.00114	0.175516	0.209934	0.166623	0.313463	0.47504
2,95	2.32195	2.40571	2.14592	6.96025	6.89952	6.3397	1.78062	0.858418	1.24075	1.86299	1.00824	1.53729	-0.00171	0.172253	0.21127	0.166888	0.31359	0.477753
2,95333333	2.32764	2.40752	2.14897	6.96009	6.90033	6.34853	1.78029	0.858437	1.24401	1.86228	1.01219	1.54205	-0.0032	0.16852	0.210497	0.165678	0.314309	0.472656
2,95666667	2.33094	2.40892	2.15522	6.96283	6.89853	6.34169	1.78177	0.857276	1.24353	1.86387	1.0145	1.54195	-0.00572	0.167213	0.210636	0.163425	0.314399	0.478615
2,96	2.33818	2.4192	2.16022	6.96436	6.902	6.34741	1.78213	0.860887	1.24499	1.86573	1.01208	1.54198	-0.00452	0.165411	0.210973	0.163805	0.314268	0.469465
2,96333333	2.34227	2.4223	2.16712	6.96925	6.90088	6.34831	1.78295	0.859842	1.24097	1.86599	1.01598	1.54163	-0.00335	0.167116	0.210943	0.163536	0.314575	0.479096
2,96666667	2.34807	2.427	2.17014	6.96987	6.9042	6.35388	1.78205	0.863036	1.23992	1.86622	1.01239	1.54139	-0.00244	0.169929	0.209229	0.164153	0.314439	0.472406
2,97	2.35089	2.42803	2.17482	6.97205	6.90817	6.35867	1.78479	0.863734	1.24531	1.86533	1.01469	1.53784	-0.00479	0.171078	0.209777	0.163295	0.313879	0.474451
2,97333333	2.35691	2.43056	2.18089	6.97263	6.91021	6.35613	1.78282	0.856252	1.24187	1.86271	1.00958	1.53888	-0.0046	0.173032	0.210602	0.162955	0.31339	0.47698
2,97666667	2.36031	2.43842	2.17882	6.97522	6.91201	6.35857	1.78236	0.861202	1.2436	1.86293	1.0117	1.54886	-0.00472	0.174479	0.212281	0.1633	0.312134	0.474982
2,98	2.36645	2.43854	2.18291	6.97435	6.91474	6.36198	1.78141	0.861016	1.242	1.86401	1.01064	1.53923	-0.00441	0.172532	0.212461	0.164418	0.308759	0.478606
2,98333333	2.37052	2.43628	2.18921	6.97662	6.91203	6.36159	1.78051	0.86135	1.24394	1.86363	1.01272	1.53787	-0.00295	0.170525	0.212219	0.162015	0.306619	0.472151
2,98666667	2.37378	2.44851	2.19988	6.97916	6.91483	6.36468	1.77741	0.86374	1.24233	1.86579	1.00825	1.53619	-0.00078	0.170874	0.212339	0.163944	0.303961	0.480601
2,99	2.37702	2.4589	2.20331	6.98007	6.9151	6.3701	1.77801	0.859598	1.24167	1.86487	1.01001	1.5399	0.001806	0.170198	0.212064	0.16433	0.301588	0.474797
2,99333333	2.38362	2.45618	2.20099	6.97994	6.91478	6.37262	1.7782	0.860049	1.24399	1.8648	1.01112	1.53692	0.00273	0.166544	0.212421	0.165771	0.29926	0.478761
2,99666667	2.38541	2.45445	2.20742	6.98268	6.91515	6.37582	1.77817	0.862446	1.24276	1.86247	1.01254	1.5404	0.003305	0.168462	0.210552	0.164782	0.299278	0.475752
3	2.3904	2.46463	2.21258	6.98388	6.91969	6.37578	1.78055	0.857348	1.24578	1.86406	1.01465	1.53844	0.002835	0.169495	0.21077	0.165575	0.298235	0.475743
3,00333333	2.39445	2.46975	2.21705	6.98586	6.92519	6.3733	1.78299	0.862468	1.2445	1.8636	1.0113	1.54168	0.003619	0.171795	0.212872	0.165101	0.297334	0.47646
3,00666667	2.39926	2.473	2.22279	6.988	6.92427	6.37993	1.78431	0.856372	1.24179	1.86518	1.01231	1.5372	-1.3e-05	0.172932	0.21515	0.165807	0.296895	0.471253
3,01	2.40198	2.47673	2.22109	6.99125	6.92868	6.37731	1.78532	0.861056	1.24359	1.86583	1.01245	1.53802	-0.00133	0.17708	0.215565	0.164694	0.295328	0.477192
3,01333333	2.40726	2.47779	2.23165	6.99241	6.9292	6.38144	1.78647	0.860655	1.24229	1.86694	1.01494	1.54102	-0.00196	0.17645	0.217753	0.164351	0.294297	0.471345
3,01666667	2.40832	2.48075	2.23162	6.99491	6.9284	6.38051	1.7856	0.863568	1.24553	1.86441	1.01281	1.53773	-0.0021	0.175832	0.217202	0.163857	0.293302	0.476739
3,02	2.41349	2.48494	2.23974	6.99527	6.93136	6.38471	1.7846	0.859442	1.24208	1.86454	1.01445	1.53949	-0.00232	0.17412	0.213591	0.163487	0.293409	0.474653
3,02333333	2.41766	2.48793	2.24087	6.99759	6.93103	6.38708	1.7836	0.859316	1.24308	1.86439	1.01149	1.537	0.000713	0.170886	0.210849	0.163765	0.292373	0.473447
3,02666667	2.42532	2.49851	2.24814	6.99851	6.93351	6.38888	1.78467	0.867022	1.24187	1.86486	1.01266	1.54081	0.000314	0.169504	0.209317	0.163534	0.292598	0.475891
3,03	2.42963	2.49966	2.25033	7.00028	6.93795	6.38782	1.78355	0.861393	1.2428	1.8665	1.01138	1.53936	0.001127	0.169744	0.208053	0.163637	0.293301	0.469992
3,03333333	2.43745	2.50418	2.25359	7.00094	6.93956	6.39509	1.78459	0.864258	1.24267	1.86651	1.00504	1.53971	0.001292	0.169577	0.210488	0.164347	0.293493	0.473499
3,03666667	2.44343	2.50622	2.25911	7.00146	6.94061	6.39234	1.78441	0.861455	1.24734	1.86611	1.0162	1.53873	0.000854	0.169251	0.214288	0.16488	0.292669	0.470335
3,04	2.44866	2.51002	2.26238	7.00282	6.94175	6.39522	1.78563	0.860588	1.23995	1.86581	1.01352	1.53539	0.001087	0.170848	0.214896	0.164184	0.292971	0.473161
3,04333333	2.45144	2.51214	2.26851	7.00447	6.94337	6.40415	1.78565	0.860671	1.23922	1.86411	1.0144	1.53957	-0.00137	0.171645	0.215752	0.164213	0.292159	0.472993
3,04666667	2.45605	2.51486	2.27209	7.00256	6.94185	6.40116	1.78748	0.859939	1.24375	1.86248	1.01618	1.54062	-0.0022	0.17173	0.216636	0.163674	0.289964	0.473855
3,05	2.45996	2.51825	2.27592	7.00365	6.94806	6.39795	1.78587	0.861288	1.24205	1.86425	1.01578	1.54303	-0.00298	0.173319	0.216576	0.163177	0.29008	0.476314
3,05333333	2.46542	2.52433	2.27918	7.00601	6.94141	6.4047	1.78623	0.857993	1.23967	1.86353	1.01472	1.54294	-0.00142	0.172888	0.212032	0.16362	0.289413	0.470611
3,05666667	2.47055	2.53229	2.27889	7.00615	6.95065	6.40645	1.78612	0.861607	1.2435	1.86322	1.01668	1.53695	-0.00055	0.174224	0.212035	0.164801	0.288905	0.47622
3,06	2.47681	2.53245	2.28824	7.00828	6.94739	6.4106	1.78474	0.862621	1.24464	1.86301	1.0133	1.54116	0.002001	0.172012	0.210663	0.16522	0.29001	0.469024
3,06333333	2.48227	2.53446	2.29146	7.01149	6.9525	6.40914	1.7844	0.859478	1.24455	1.86287	1.01477	1.54098	-0.00102	0.169943	0.212038	0.164935	0.290869	0.475395
3,06666667	2.48728	2.53964	2.30141	7.01244	6.95388	6.40903	1.78548	0.858631	1.24301	1.86123	1.01185	1.53892	-0.00074	0.169221	0.208639	0.165367	0.290264	0.474205
3,07	2.49225	2.54936	2.30247	7.0134	6.95442	6.41655	1.78667	0.858155	1.24226	1.86156	1.01554	1.54013	-0.00271	0.168874	0.210409	0.16501	0.291435	0.472081
3,07333333	2.49585	2.54516	2.30749	7.01548	6.95412	6.4167	1.78649	0.861394	1.24415	1.86501	1.01653	1.54155	-0.00561	0.168242	0.211474	0.16429	0.291958	0.475376
3,07666667	2.49898	2.55517	2.31086	7.01666	6.95466	6.41516	1.78749	0.861689	1.24281	1.86625	1.01722	1.53923	-0.00471	0.167206	0.214177	0.165315	0.291536	0.472543
3,08	2.50176	2.55666	2.31369	7.01808	6.9615	6.41797	1.78785	0.863033	1.24338	1.86585	1.01704	1.54007	-0.00219	0.170746	0.214366	0.165764	0.293204	0.473137
3,08333333	2.50571	2.55963	2.32097	7.02	6.96072	6.41808	1.7884	0.863546	1.24316	1.86707	1.01678	1.5399	-0.00189	0.170575	0.217855	0.165581	0.294953	0.471603
3,08666667	2.50831	2.56423	2.32409	7.02086	6.96069	6.42106	1.78762	0.860333	1.24572	1.86482	1.01237	1.54549	-0.0026	0.171834	0.219343	0.163144	0.295744	0.473387
3,09	2.51265	2.56899	2.32926	7.02199	6.96825	6.42291	1.78724	0.865437	1.24083	1.86284	1.01427	1.53987	-0.00332	0.170179	0.218878	0.16414	0.296392	0.472587
3,09333333	2.51871	2.57016	2.33171	7.02164	6.96865	6.42198	1.78688	0.861784	1.24024	1.86559	1.01296	1.54416	-0.00506	0.172366	0.218153	0.163515	0.298548	0.469459
3,09666667	2.52296	2.57544	2.33613	7.02357	6.9727	6.4276	1.78764	0.864818	1.24244	1.86647	1.01604	1.53874	-0.00485	0.172602	0.215847	0.165144	0.298905	0.473119
3,1	2.52916	2.58023	2.34091	7.02473	6.96962	6.43518	1.78873	0.863961	1.24087	1.8672	1.01936	1.53595	-0.00395	0.172642	0.212899	0.165725	0.297788	0.468593
3,10333333	2.53393	2.58383	2.34321	7.02762	6.97162	6.4273	1.78938	0.862281	1.24123	1.87016	1.01998	1.53884	-0.0022	0.172346	0.212294	0.167399	0.297545	0.473047
3,10666667	2.54094	2.5881	2.34818	7.02755	6.97418	6.43167	1.79004	0.856608	1.24502	1.87056	1.01408	1.53944	-0.00264	0.172428	0.213736	0.166414	0.298953	0.472448
3,11	2.54425	2.59006	2.35715	7.03026	6.9718	6.43728	1.79173	0.862727	1.24551	1.86929	1.01826	1.53853	0.002253	0.172297	0.211622	0.165044	0.300106	0.472791
3,11333333	2.55114	2.59561	2.35878	7.03082	6.97408	6.43305	1.79163	0.865848	1.24095	1.86964	1.01611	1.54371	0.004639	0.169955	0.212572	0.164243	0.299753	0.476452
3,11666667	2.55345	2.60478	2.36016	7.0335	6.97561	6.43682	1.79117	0.863951	1.24079	1.86946	1.01351	1.53785	0.002716	0.169265	0.215521	0.165302	0.30102	0.471938
3,12	2.55841	2.60341	2.36542	7.03401	6.97728	6.44103	1.78991	0.862857	1.24405	1.8696	1.01771	1.53996	0.003357	0.170371	0.213003	0.166053	0.303073	0.473218
3,12333333	2.56021	2.60733	2.36968	7.03683	6.97867	6.44153	1.79058	0.865522	1.24128	1.86978	1.01218	1.54433	0.004945	0.172934	0.20948	0.166235	0.30586	0.469899
3,12666667	2.56664	2.6104	2.37406	7.03758	6.97796	6.44191	1.78895	0.863554	1.24394	1.87059	1.01575	1.54013	6.91e-05	0.173195	0.2094	0.168644	0.306353	0.472211
3,13	2.5714	2.61168	2.37831	7.03835	6.98366	6.44471	1.78932	0.8641	1.24095	1.87056	1.01441	1.53362	-0.0029	0.174433	0.210129	0.167965	0.309456	0.469762
3,13333333	2.57751	2.61864	2.37989	7.03827	6.97784	6.44563	1.78961	0.865719	1.24124	1.87077	1.01517	1.54212	-0.00222	0.174141	0.210003	0.166312	0.312582	0.468437
3,13666667	2.58339	2.6178	2.38428	7.03983	6.98339	6.44776	1.7913	0.861069	1.23954	1.86946	1.01709	1.54177	-0.00316	0.173359	0.2135	0.168255	0.315154	0.471255
3,14	2.59081	2.62728	2.39031	7.03969	6.98721	6.45176	1.7901	0.862711	1.23879	1.86984	1.01825	1.54073	-0.00228	0.173657	0.215287	0.168471	0.314712	0.471599
3,14333333	2.5955	2.62594	2.39144	7.0403	6.98668	6.45152	1.7905	0.861613	1.24074	1.86947	1.01965	1.5414	-0.00037	0.171724	0.217324	0.168317	0.315706	0.471332
3,14666667	2.6011	2.63026	2.39786	7.04171	6.98892	6.4509	1.79034	0.864006	1.24217	1.86846	1.01626	1.54398	0.000503	0.170835	0.217094	0.168719	0.317744	0.470607
3,15	2.60604	2.64048	2.40421	7.04456	6.98836	6.44998	1.79011	0.861818	1.24434	1.86585	1.0177	1.54374	-0.0004	0.171618	0.21599	0.168832	0.31702	0.471539
3,15333333	2.6103	2.64452	2.40527	7.04585	6.98771	6.45319	1.79025	0.86307	1.24363	1.86894	1.01696	1.54197	-0.00089	0.174044	0.213987	0.166448	0.315578	0.473326
3,15666667	2.61425	2.64745	2.41246	7.04807	6.98905	6.45509	1.79172	0.864283	1.24434	1.86724	1.01804	1.53681	-0.00145	0.173935	0.213761	0.165692	0.315987	0.467148
3,16	2.6185	2.65139	2.41761	7.0506	6.99497	6.46113	1.79437	0.868393	1.23767	1.86654	1.0209	1.53867	-0.00274	0.176186	0.214589	0.164425	0.31476	0.473352
3,16333333	2.6205	2.65176	2.41866	7.05165	6.98786	6.46027	1.79508	0.863083	1.24151	1.86784	1.01965	1.54389	-0.00463	0.177291	0.213593	0.164505	0.311025	0.468602
3,16666667	2.62341	2.65419	2.42685	7.05118	6.989	6.46411	1.79413	0.863124	1.24108	1.86951	1.01849	1.5432	-0.00326	0.177571	0.213597	0.16686	0.309515	0.467799
3,17	2.62753	2.66017	2.42356	7.05089	7.00009	6.46288	1.79256	0.865139	1.23719	1.86813	1.01697	1.53448	-0.00443	0.176013	0.215422	0.166166	0.307608	0.468335
3,17333333	2.63033	2.66622	2.43451	7.05298	7.0011	6.4655	1.79266	0.863772	1.23931	1.87057	1.01981	1.54036	-0.00543	0.175115	0.215948	0.166242	0.30505	0.467014
3,17666667	2.63425	2.67135	2.43808	7.05327	7.00236	6.4664	1.79133	0.864153	1.23897	1.87035	1.01856	1.54215	-0.00539	0.175447	0.213965	0.167607	0.304086	0.466918
3,18	2.64027	2.67755	2.44167	7.05507	7.00239	6.46773	1.79131	0.864644	1.23924	1.87066	1.01852	1.5381	-0.00313	0.175118	0.215362	0.167369	0.302848	0.465547
3,18333333	2.6453	2.67767	2.44229	7.05644	7.00115	6.46436	1.79071	0.865544	1.23959	1.87025	1.02148	1.53898	-0.00327	0.175579	0.217458	0.166993	0.300728	0.469235
3,18666667	2.64912	2.68187	2.44903	7.05875	7.00447	6.47497	1.79236	0.862709	1.24257	1.86872	1.01471	1.53714	-0.0038	0.176029	0.217971	0.168283	0.298904	0.468338
3,19	2.65479	2.68485	2.44865	7.05822	7.00197	6.46789	1.79248	0.861734	1.23932	1.86814	1.01963	1.54221	-0.00085	0.177002	0.21851	0.167768	0.297368	0.467283
3,19333333	2.6612	2.6886	2.45648	7.05949	7.00954	6.47171	1.79329	0.865815	1.24197	1.86777	1.01901	1.53923	-0.00339	0.176278	0.219908	0.167841	0.295005	0.469295
3,19666667	2.66532	2.6883	2.45969	7.05987	7.01565	6.47782	1.79376	0.867919	1.24197	1.86732	1.01643	1.54105	-0.00235	0.176813	0.218563	0.168046	0.294289	0.467276
3,2	2.6703	2.69062	2.46347	7.06147	7.00981	6.48357	1.79593	0.864185	1.23347	1.86714	1.02343	1.54416	-0.00292	0.176466	0.216476	0.165699	0.292873	0.467797
3,20333333	2.67625	2.69669	2.46157	7.06224	7.01207	6.48022	1.7961	0.865291	1.24177	1.86786	1.02025	1.53994	0.000247	0.175744	0.214229	0.163814	0.29163	0.466516
3,20666667	2.67923	2.70056	2.46844	7.06443	7.01362	6.47977	1.79643	0.868912	1.24163	1.86769	1.01876	1.54037	-0.00102	0.17341	0.213654	0.164767	0.29004	0.467789
3,21	2.68182	2.70537	2.47306	7.06654	7.01496	6.48077	1.79627	0.862815	1.24261	1.86882	1.01734	1.54501	0.001742	0.174847	0.213312	0.165246	0.290945	0.46885
3,21333333	2.68525	2.7069	2.48298	7.0685	7.01338	6.48723	1.79511	0.861368	1.23904	1.86742	1.01812	1.54547	-0.00038	0.173125	0.211348	0.164005	0.290217	0.466815
3,21666667	2.68887	2.71526	2.48575	7.06944	7.02407	6.48606	1.79463	0.864548	1.23936	1.86996	1.02264	1.54051	-0.00144	0.17316	0.21135	0.165639	0.290444	0.468963
3,22	2.6907	2.71647	2.4853	7.07065	7.02217	6.48822	1.79401	0.863842	1.23785	1.87087	1.02107	1.54039	-0.00119	0.172156	0.211035	0.167011	0.29099	0.467091
3,22333333	2.69556	2.72227	2.48628	7.07155	7.02144	6.48761	1.79364	0.865249	1.24069	1.87011	1.02255	1.53869	-0.0015	0.174216	0.209338	0.167509	0.291806	0.464102
3,22666667	2.70233	2.72726	2.49862	7.07238	7.02422	6.48792	1.79332	0.862146	1.2393	1.86911	1.01811	1.53813	-0.00179	0.173096	0.208675	0.166645	0.29044	0.464629
3,23	2.70907	2.72605	2.49187	7.07345	7.02185	6.49651	1.79258	0.86555	1.24069	1.8697	1.02068	1.54144	-0.00173	0.175066	0.211241	0.167476	0.290372	0.462727
3,23333333	2.71321	2.73095	2.50524	7.07482	7.0206	6.4941	1.7935	0.865273	1.24238	1.86893	1.01891	1.53685	-0.00073	0.175357	0.209975	0.166293	0.291301	0.464127
3,23666667	2.71872	2.73615	2.50827	7.07685	7.02399	6.49646	1.79442	0.860366	1.2408	1.86859	1.02438	1.54059	-0.00205	0.178671	0.209341	0.165693	0.291242	0.463456
3,24	2.72476	2.74138	2.51735	7.07827	7.02646	6.49326	1.79343	0.86492	1.23737	1.87005	1.02435	1.53617	-0.00057	0.179365	0.211396	0.165948	0.290661	0.466972
3,24333333	2.72869	2.7411	2.51814	7.08016	7.02713	6.5007	1.79395	0.868768	1.24102	1.87205	1.02247	1.53782	0.000846	0.180356	0.211283	0.166174	0.292233	0.465479
3,24666667	2.7334	2.74799	2.52483	7.08074	7.03235	6.49502	1.79548	0.867969	1.23839	1.87091	1.02015	1.53833	0.003438	0.178517	0.208797	0.167353	0.293782	0.465471
3,25	2.73866	2.7526	2.52793	7.08281	7.02723	6.50097	1.79523	0.863198	1.24013	1.87027	1.02275	1.53684	0.002966	0.178736	0.210495	0.167052	0.294819	0.467898
3,25333333	2.74304	2.75597	2.53302	7.08362	7.0323	6.50373	1.79517	0.869729	1.24278	1.87069	1.01649	1.53969	0.004179	0.17501	0.209928	0.168918	0.297223	0.464143
3,25666667	2.74471	2.76111	2.53339	7.08554	7.03432	6.50181	1.79737	0.86504	1.23936	1.8692	1.01978	1.54002	0.003023	0.174243	0.210083	0.167972	0.298963	0.466666
3,26	2.74997	2.76559	2.53643	7.08625	7.03706	6.50609	1.79757	0.865128	1.24028	1.8677	1.01629	1.54148	0.001968	0.173851	0.208867	0.168424	0.301523	0.465697
3,26333333	2.7526	2.76655	2.53978	7.08886	7.03844	6.50556	1.79788	0.868121	1.24236	1.86818	1.0149	1.54423	-0.00026	0.174205	0.209877	0.167367	0.303803	0.464741
3,26666667	2.75676	2.77017	2.54564	7.08891	7.03643	6.51042	1.79819	0.866254	1.23995	1.86777	1.02122	1.53626	0.000447	0.174407	0.210847	0.169165	0.306598	0.465406
3,27	2.76145	2.77503	2.55	7.08963	7.04172	6.51111	1.79776	0.866135	1.24462	1.86709	1.01834	1.54087	-0.00011	0.17735	0.21146	0.167844	0.308769	0.464416
3,27333333	2.7666	2.77965	2.55304	7.09067	7.03969	6.51026	1.79763	0.867737	1.23471	1.86854	1.02075	1.54257	0.000805	0.178675	0.208737	0.167648	0.311337	0.462992
3,27666667	2.772	2.78379	2.55599	7.09332	7.0432	6.51078	1.79723	0.865061	1.24203	1.86909	1.02182	1.54399	0.000863	0.178921	0.208504	0.165744	0.313116	0.461334
3,28	2.77588	2.783	2.55869	7.09448	7.04696	6.51183	1.79728	0.862279	1.23763	1.86934	1.02232	1.54104	0.002759	0.178961	0.207762	0.165547	0.313159	0.461617
3,28333333	2.77928	2.78521	2.56195	7.09565	7.04895	6.52079	1.79646	0.864222	1.23879	1.86895	1.01818	1.54445	0.001191	0.179959	0.20707	0.165239	0.313672	0.459381
3,28666667	2.78465	2.79577	2.56821	7.0986	7.04666	6.51918	1.79685	0.867734	1.23671	1.86972	1.01985	1.5349	0.002246	0.180828	0.208003	0.167121	0.312424	0.459227
3,29	2.78971	2.79232	2.57429	7.0988	7.04682	6.52213	1.79639	0.864472	1.24134	1.86998	1.01653	1.536	0.000893	0.179516	0.210594	0.167853	0.309328	0.460144
3,29333333	2.79458	2.79936	2.57707	7.09946	7.05074	6.52379	1.7951	0.861559	1.23317	1.8687	1.02135	1.53897	0.001254	0.179413	0.21235	0.169294	0.306852	0.462912
3,29666667	2.79805	2.80297	2.57896	7.10078	7.05302	6.52013	1.79449	0.86538	1.24207	1.87066	1.02224	1.53561	0.000219	0.183003	0.214131	0.168783	0.304812	0.461879
3,3	2.80348	2.80081	2.58791	7.10138	7.05431	6.52545	1.7944	0.867339	1.23706	1.87188	1.02269	1.53748	0.001578	0.182166	0.212713	0.168471	0.300237	0.464739
3,30333333	2.80629	2.8057	2.58671	7.10215	7.05353	6.52483	1.79423	0.862371	1.23747	1.87199	1.02328	1.54086	-0.00076	0.182604	0.212472	0.16646	0.297917	0.462956
3,30666667	2.80986	2.81549	2.59185	7.10445	7.05653	6.52763	1.79373	0.862613	1.23862	1.86947	1.01806	1.53987	-0.00081	0.183375	0.209194	0.167818	0.297456	0.465046
3,31	2.81395	2.81971	2.59628	7.10572	7.05588	6.52961	1.79498	0.869598	1.23576	1.87092	1.02024	1.53916	-0.00279	0.183692	0.207008	0.169168	0.294281	0.462739
3,31333333	2.81958	2.82111	2.60056	7.10644	7.05332	6.53876	1.79508	0.865283	1.23812	1.87108	1.01848	1.54224	-0.00149	0.180768	0.204948	0.170076	0.292195	0.464824
3,31666667	2.82461	2.82485	2.60604	7.10858	7.05927	6.53232	1.79515	0.863386	1.23811	1.87053	1.02188	1.53874	0.000153	0.180753	0.205946	0.171463	0.292437	0.463026
3,32	2.83187	2.82493	2.61016	7.1096	7.06342	6.5317	1.79504	0.8639	1.24175	1.86842	1.01988	1.53989	0.000978	0.177626	0.205868	0.171524	0.290976	0.461581
3,32333333	2.83677	2.83149	2.61216	7.11084	7.06712	6.53644	1.79559	0.866858	1.23615	1.86998	1.01776	1.54049	0.000855	0.175854	0.205507	0.170319	0.290478	0.462635
3,32666667	2.84332	2.83421	2.61759	7.11352	7.06172	6.53902	1.79637	0.867963	1.2357	1.87045	1.02071	1.53985	0.003104	0.177307	0.205152	0.16761	0.29302	0.459553
3,33	2.84855	2.83749	2.62572	7.11524	7.06039	6.53454	1.79786	0.864662	1.23594	1.86951	1.01999	1.53844	0.003422	0.179011	0.204886	0.167729	0.294126	0.4589
3,33333333	2.85301	2.84101	2.62748	7.1168	7.06297	6.5392	1.79828	0.863495	1.23664	1.86927	1.02244	1.53731	0.002825	0.178158	0.204949	0.166516	0.294923	0.460216
3,33666667	2.85569	2.84801	2.62739	7.11687	7.07293	6.5413	1.80004	0.865523	1.23964	1.87204	1.01763	1.53889	0.001114	0.179614	0.204812	0.168285	0.296981	0.459207
3,34	2.86173	2.85244	2.63363	7.11768	7.06471	6.54306	1.80022	0.866832	1.24286	1.87146	1.02239	1.54298	0.00032	0.179822	0.206621	0.167559	0.298856	0.458794
3,34333333	2.86478	2.8503	2.64028	7.11636	7.06998	6.54556	1.80044	0.869296	1.23639	1.87056	1.01937	1.53956	-0.00088	0.177188	0.206757	0.168144	0.300081	0.457452
3,34666667	2.8699	2.86048	2.64033	7.11665	7.06981	6.54524	1.79965	0.866394	1.23495	1.8716	1.02039	1.53705	-0.00213	0.176689	0.207479	0.16908	0.303288	0.458462
3,35	2.87459	2.86086	2.64643	7.11732	7.06708	6.5495	1.80085	0.865215	1.23938	1.87101	1.01953	1.5423	-0.00177	0.177409	0.206106	0.169578	0.307186	0.458739
3,35333333	2.87752	2.86147	2.6468	7.11955	7.0679	6.55034	1.8003	0.864831	1.24127	1.86959	1.02047	1.53989	0.00012	0.175119	0.205537	0.169591	0.309367	0.459479
3,35666667	2.88141	2.86948	2.65682	7.12012	7.06971	6.55328	1.80016	0.863638	1.23662	1.87031	1.02412	1.54025	0.001886	0.177188	0.203946	0.170162	0.311633	0.458924
3,36	2.88564	2.87254	2.65375	7.12083	7.0766	6.54929	1.79926	0.861892	1.23863	1.87181	1.02067	1.54014	0.002553	0.17946	0.204363	0.171737	0.31246	0.459211
3,36333333	2.88857	2.87079	2.66145	7.12282	7.07939	6.55136	1.79968	0.865966	1.23866	1.869	1.02216	1.54274	0.002428	0.177837	0.203674	0.172074	0.309872	0.460305
3,36666667	2.89143	2.88166	2.66396	7.12459	7.07867	6.55799	1.79854	0.868074	1.23845	1.87068	1.0232	1.54119	0.003081	0.177608	0.203017	0.170911	0.306514	0.458828
3,37	2.89573	2.88457	2.66911	7.12589	7.08084	6.55802	1.79891	0.866611	1.24252	1.87119	1.02107	1.53477	0.005418	0.180382	0.202303	0.16949	0.304884	0.458699
3,37333333	2.89952	2.88064	2.6719	7.12715	7.08211	6.55683	1.79988	0.870954	1.23823	1.87087	1.01947	1.54441	0.005176	0.180919	0.202036	0.169924	0.301822	0.45988
3,37666667	2.90425	2.88681	2.67482	7.13088	7.08673	6.55984	1.80006	0.867547	1.24023	1.86797	1.02054	1.54005	0.005582	0.180743	0.201498	0.169685	0.299123	0.458949
3,38	2.909	2.89293	2.68018	7.13027	7.08796	6.56306	1.80021	0.869977	1.23701	1.87274	1.0257	1.53719	0.007295	0.182093	0.202855	0.168944	0.297698	0.459611
3,38333333	2.91338	2.89648	2.68802	7.12985	7.08247	6.5644	1.80089	0.867127	1.23711	1.87118	1.0221	1.54084	0.008278	0.181297	0.20541	0.169569	0.294466	0.459059
3,38666667	2.9194	2.9007	2.6883	7.13067	7.08267	6.56254	1.80191	0.869083	1.23776	1.87244	1.02064	1.53993	0.007099	0.181814	0.206772	0.170683	0.292909	0.457999
3,39	2.92256	2.90389	2.69315	7.13275	7.09218	6.56384	1.80223	0.864182	1.2397	1.87397	1.02178	1.54015	0.008825	0.180536	0.207183	0.170936	0.292275	0.456435
3,39333333	2.92786	2.9032	2.70043	7.13333	7.08768	6.56584	1.80273	0.871521	1.24115	1.87564	1.02205	1.54228	0.008175	0.179764	0.209527	0.171649	0.289938	0.454383
3,39666667	2.93065	2.91258	2.70012	7.13628	7.08915	6.5724	1.80258	0.8665	1.24165	1.87217	1.02217	1.54091	0.008214	0.180099	0.209459	0.172447	0.291564	0.454046
3,4	2.9351	2.9173	2.70243	7.13839	7.09447	6.57153	1.80298	0.865689	1.237	1.87511	1.02354	1.54056	0.006929	0.181487	0.208833	0.173068	0.294066	0.454864
3,40333333	2.93776	2.92032	2.70851	7.13949	7.09486	6.56713	1.80232	0.865852	1.23493	1.87526	1.02369	1.53943	0.00749	0.182436	0.210013	0.173099	0.296569	0.456169
3,40666667	2.94348	2.92272	2.71294	7.13968	7.09321	6.57152	1.8014	0.866845	1.23896	1.87482	1.021	1.53642	0.007482	0.182952	0.211501	0.171106	0.29884	0.456224
3,41	2.94857	2.92405	2.71475	7.13909	7.0943	6.57893	1.80114	0.86507	1.23957	1.87443	1.02239	1.54262	0.007664	0.182682	0.210181	0.17091	0.302581	0.458463
3,41333333	2.9517	2.93331	2.72104	7.1403	7.10251	6.57502	1.80184	0.866021	1.23752	1.87666	1.02188	1.54457	0.008926	0.182711	0.208301	0.170101	0.304393	0.457115
3,41666667	2.95509	2.92933	2.72338	7.14136	7.09762	6.57435	1.80182	0.866271	1.2394	1.8755	1.02535	1.53988	0.008395	0.182904	0.207783	0.168793	0.30832	0.456533
3,42	2.95916	2.9354	2.72467	7.14177	7.09833	6.57677	1.80087	0.868252	1.24054	1.87451	1.02073	1.53971	0.007573	0.181876	0.20651	0.16788	0.30972	0.45507
3,42333333	2.96255	2.93949	2.73284	7.14306	7.10108	6.57697	1.80152	0.868512	1.23902	1.873	1.02703	1.53884	0.006891	0.180414	0.206197	0.168555	0.310529	0.456796
3,42666667	2.96503	2.9422	2.73228	7.14738	7.10208	6.58082	1.80066	0.865942	1.23732	1.87326	1.01933	1.53793	0.007337	0.180284	0.205301	0.166365	0.312732	0.455043
3,43	2.97022	2.94462	2.73471	7.14799	7.1027	6.58143	1.80156	0.8646	1.23704	1.87283	1.02122	1.54055	0.004867	0.178487	0.205173	0.165807	0.310962	0.456236
3,43333333	2.97456	2.94908	2.74336	7.15003	7.10328	6.58167	1.80091	0.87004	1.23459	1.87287	1.02219	1.53848	0.005043	0.179048	0.203471	0.167182	0.307726	0.45784
3,43666667	2.97999	2.95003	2.74894	7.14977	7.10308	6.58538	1.8025	0.863068	1.24055	1.8719	1.02335	1.53835	0.003549	0.179108	0.20419	0.167267	0.305218	0.45829
3,44	2.9841	2.95637	2.75236	7.15189	7.10976	6.583	1.80282	0.863724	1.2427	1.87373	1.02425	1.54168	0.004948	0.18056	0.204494	0.168536	0.302974	0.457697
3,44333333	2.98941	2.95562	2.75476	7.15131	7.10616	6.58875	1.80487	0.865326	1.23726	1.87511	1.02312	1.54019	0.004749	0.180864	0.204521	0.168871	0.298682	0.458913
3,44666667	2.99471	2.96709	2.75937	7.15251	7.10749	6.58749	1.80373	0.870166	1.23798	1.87412	1.02745	1.53608	0.003361	0.181092	0.204506	0.168773	0.296713	0.456859
3,45	2.99979	2.9678	2.76422	7.15212	7.10849	6.58896	1.80472	0.865023	1.24006	1.87651	1.02116	1.54055	0.002402	0.180395	0.206562	0.167285	0.294118	0.455064
3,45333333	3.00394	2.96804	2.76336	7.15506	7.11079	6.58832	1.80402	0.868988	1.23914	1.87751	1.02839	1.53944	0.003451	0.180107	0.205183	0.166709	0.292428	0.454485
3,45666667	3.00883	2.97359	2.77428	7.15689	7.1109	6.59611	1.80381	0.865284	1.23362	1.87766	1.02602	1.54017	0.001731	0.177598	0.204765	0.166204	0.291275	0.452124
3,46	3.0132	2.97414	2.77531	7.15886	7.11252	6.59245	1.80285	0.86854	1.23706	1.8778	1.02412	1.54198	0.004032	0.17884	0.204949	0.167339	0.291786	0.455907
3,46333333	3.01738	2.97702	2.77549	7.15978	7.11679	6.59453	1.80347	0.863927	1.23238	1.87872	1.02805	1.53687	0.00568	0.181749	0.203577	0.167616	0.293371	0.455121
3,46666667	3.02121	2.98382	2.779	7.16097	7.11728	6.60016	1.80375	0.87061	1.23791	1.87696	1.02444	1.53694	0.007193	0.182139	0.202056	0.167353	0.296692	0.455124
3,47	3.02485	2.98631	2.78533	7.16102	7.11728	6.59384	1.80347	0.86642	1.23701	1.87796	1.02832	1.53598	0.007723	0.181786	0.201933	0.168091	0.300362	0.459943
3,47333333	3.02974	2.9895	2.78195	7.16066	7.12139	6.59835	1.80289	0.865822	1.23639	1.8789	1.02195	1.54072	0.009295	0.182764	0.202652	0.167328	0.304986	0.459131
3,47666667	3.03466	2.99405	2.79008	7.16153	7.12235	6.60085	1.80404	0.867905	1.23854	1.87727	1.02205	1.53527	0.008999	0.180185	0.202366	0.165601	0.307508	0.460618
3,48	3.03867	2.99585	2.79567	7.1622	7.12024	6.60474	1.80406	0.86647	1.23524	1.87706	1.02753	1.53582	0.009417	0.178593	0.205256	0.167205	0.309471	0.459573
3,48333333	3.04359	3.00248	2.80101	7.16374	7.11996	6.60495	1.80334	0.865364	1.23786	1.87671	1.02209	1.53947	0.011691	0.179231	0.205053	0.169106	0.311297	0.460218
3,48666667	3.04866	3.00568	2.80653	7.16698	7.12781	6.60532	1.80461	0.869999	1.23252	1.87508	1.02729	1.53425	0.010145	0.178941	0.203811	0.170415	0.309496	0.458234
3,49	3.05251	3.00593	2.80552	7.16868	7.12355	6.60086	1.80564	0.868683	1.23936	1.87281	1.02499	1.54104	0.009041	0.177946	0.20323	0.171671	0.305641	0.457488
3,49333333	3.0571	3.01623	2.81149	7.16916	7.13064	6.60902	1.80589	0.870017	1.23625	1.87411	1.02473	1.54017	0.007421	0.183054	0.201653	0.173665	0.302242	0.458613
3,49666667	3.06356	3.0128	2.81559	7.17075	7.12562	6.60987	1.80625	0.870996	1.23599	1.87426	1.0227	1.54191	0.007494	0.183715	0.199458	0.172281	0.300158	0.459163
3,5	3.06812	3.01709	2.8211	7.17214	7.12527	6.60899	1.80703	0.867896	1.23884	1.87462	1.02276	1.53863	0.005509	0.183183	0.199248	0.171039	0.294043	0.456166
3,50333333	3.07192	3.01909	2.82123	7.17192	7.13194	6.6116	1.80683	0.865219	1.23763	1.87545	1.02415	1.54029	0.009658	0.182704	0.201055	0.16875	0.290872	0.458633
3,50666667	3.07716	3.02065	2.82582	7.1732	7.13115	6.61465	1.80714	0.870536	1.23854	1.87537	1.02657	1.53784	0.009567	0.187288	0.200254	0.168909	0.28952	0.454866
3,51	3.0803	3.02617	2.83019	7.17487	7.13165	6.61193	1.80657	0.867519	1.23579	1.87554	1.02121	1.53715	0.010369	0.182222	0.200591	0.167749	0.288881	0.454822
3,51333333	3.08354	3.03241	2.83389	7.17591	7.12872	6.61703	1.80783	0.866052	1.23862	1.8751	1.02332	1.53766	0.011214	0.182669	0.201771	0.167386	0.290332	0.453671
3,51666667	3.08778	3.03531	2.83793	7.1783	7.13349	6.6164	1.80862	0.87197	1.23565	1.87368	1.02989	1.53742	0.010921	0.181384	0.202569	0.167719	0.292939	0.452181
3,52	3.09155	3.03883	2.8449	7.18059	7.13331	6.61354	1.80813	0.86876	1.23937	1.87342	1.02456	1.54259	0.008072	0.182223	0.201694	0.169536	0.296894	0.455297
3,52333333	3.09513	3.042	2.84417	7.18144	7.13735	6.61589	1.80827	0.867881	1.24203	1.87343	1.0227	1.54023	0.005792	0.180185	0.200612	0.169397	0.301952	0.454272
3,52666667	3.10239	3.04629	2.84675	7.18193	7.14014	6.62176	1.80888	0.867049	1.23555	1.8742	1.02202	1.53758	0.006476	0.183647	0.201379	0.170661	0.306046	0.453969
3,53	3.10638	3.04729	2.8524	7.18297	7.13727	6.6191	1.80776	0.870765	1.23461	1.87537	1.02638	1.54054	0.004832	0.184312	0.199746	0.172392	0.30768	0.455788
3,53333333	3.11005	3.04954	2.85958	7.18374	7.13623	6.6249	1.80727	0.866782	1.24115	1.87769	1.02421	1.5443	0.003793	0.186094	0.198096	0.17097	0.309553	0.454774
3,53666667	3.114	3.05226	2.86042	7.18324	7.14098	6.62304	1.80779	0.863929	1.23441	1.87614	1.0257	1.54295	0.004821	0.186967	0.197463	0.170221	0.309338	0.456507
3,54	3.11598	3.05593	2.86444	7.18352	7.14249	6.62118	1.80755	0.867564	1.23587	1.87852	1.02689	1.53567	0.009074	0.18617	0.198134	0.169232	0.305868	0.457202
3,54333333	3.11817	3.05734	2.86936	7.18531	7.14342	6.6279	1.80727	0.868858	1.23566	1.87738	1.02499	1.53454	0.006489	0.185514	0.19866	0.168428	0.301998	0.457548
3,54666667	3.1187	3.06778	2.86987	7.18504	7.1411	6.62421	1.80692	0.872713	1.23369	1.87611	1.02835	1.53707	0.006411	0.184544	0.198403	0.167946	0.29743	0.456731
3,55	3.1211	3.06779	2.87383	7.18638	7.14505	6.62857	1.80727	0.870539	1.23938	1.87579	1.03088	1.53997	0.006812	0.185443	0.197409	0.169225	0.294509	0.45875
3,55333333	3.12582	3.07346	2.87911	7.1872	7.14407	6.63165	1.80675	0.868909	1.23641	1.87727	1.02523	1.54426	0.005147	0.185425	0.196276	0.169465	0.292856	0.454539
3,55666667	3.12891	3.07136	2.88696	7.18905	7.14954	6.63812	1.80714	0.869414	1.23506	1.87445	1.02548	1.53917	0.001776	0.185784	0.196373	0.16976	0.292658	0.454796
3,56	3.13284	3.07526	2.88458	7.19228	7.15271	6.63377	1.80676	0.871386	1.23584	1.87368	1.02622	1.53815	0.001277	0.185896	0.196644	0.168306	0.29618	0.454127
3,56333333	3.13927	3.07779	2.88868	7.19471	7.14918	6.63686	1.80676	0.870067	1.23342	1.87316	1.02867	1.53817	-0.00017	0.184966	0.198944	0.167291	0.298786	0.453684
3,56666667	3.1441	3.08358	2.89801	7.19477	7.15056	6.63742	1.80713	0.870046	1.23961	1.87346	1.02543	1.53552	0.001525	0.183192	0.200365	0.168067	0.303667	0.449624
3,57	3.14652	3.08402	2.89299	7.19639	7.14839	6.64256	1.80751	0.868806	1.23541	1.87419	1.02598	1.53328	0.004061	0.181112	0.200858	0.168196	0.306518	0.45334
3,57333333	3.15247	3.09077	2.89998	7.19711	7.15469	6.64025	1.80634	0.864815	1.23605	1.87334	1.02518	1.53899	0.006094	0.181735	0.199983	0.168254	0.308967	0.452107
3,57666667	3.1575	3.09639	2.90359	7.19599	7.14778	6.63884	1.80823	0.86815	1.24083	1.87451	1.02333	1.53659	0.009331	0.182259	0.198484	0.169778	0.308417	0.45199
3,58	3.16013	3.09469	2.90642	7.19689	7.15321	6.64203	1.80873	0.868082	1.23816	1.87558	1.02979	1.53892	0.011689	0.183852	0.196837	0.169948	0.307345	0.452023
3,58333333	3.16466	3.09946	2.91158	7.19953	7.15566	6.64134	1.8091	0.869678	1.23931	1.87528	1.02718	1.54331	0.011887	0.182416	0.195945	0.169769	0.303299	0.455337
3,58666667	3.17115	3.10536	2.91391	7.20118	7.16426	6.64104	1.80899	0.86531	1.23816	1.87504	1.0224	1.53893	0.010118	0.186753	0.196072	0.171962	0.299229	0.453766
3,59	3.17532	3.10907	2.9221	7.20318	7.16323	6.64707	1.81097	0.871931	1.23515	1.87427	1.02557	1.53948	0.008043	0.184946	0.197134	0.171119	0.295824	0.454822
3,59333333	3.17827	3.10753	2.92551	7.20471	7.16174	6.64785	1.80943	0.867782	1.23128	1.87441	1.02398	1.53708	0.007274	0.180888	0.196573	0.171988	0.292684	0.45542
3,59666667	3.18532	3.11259	2.92479	7.20733	7.16111	6.64533	1.8086	0.868441	1.23891	1.87623	1.03029	1.53865	0.00436	0.183193	0.194768	0.173033	0.29204	0.453983
3,6	3.18939	3.11646	2.92459	7.2057	7.16103	6.64874	1.8087	0.871292	1.23735	1.87515	1.02334	1.53819	0.001544	0.186311	0.196	0.172898	0.29283	0.454128
3,60333333	3.19286	3.11531	2.9325	7.20707	7.16695	6.64948	1.80938	0.869614	1.24038	1.87701	1.02618	1.54195	0.000649	0.184346	0.195615	0.171185	0.294652	0.452321
3,60666667	3.19715	3.12568	2.93661	7.20722	7.16403	6.6522	1.80934	0.86674	1.23705	1.881	1.02683	1.54128	-0.00039	0.184988	0.193803	0.172336	0.298754	0.452397
3,61	3.20309	3.1289	2.94478	7.20955	7.16888	6.64963	1.81008	0.868782	1.23017	1.88184	1.02702	1.54037	0.000145	0.188394	0.192457	0.170631	0.302748	0.449484
3,61333333	3.20752	3.12451	2.94143	7.20994	7.16447	6.64954	1.81081	0.871875	1.237	1.8813	1.03205	1.5346	0.002926	0.18509	0.195287	0.171196	0.307308	0.449585
3,61666667	3.21033	3.12796	2.95142	7.21238	7.16802	6.65461	1.81079	0.868859	1.23718	1.88035	1.02571	1.54057	0.005289	0.183501	0.195422	0.169797	0.309588	0.451283
3,62	3.21352	3.14017	2.95524	7.21416	7.17287	6.65449	1.80986	0.867812	1.23737	1.87893	1.03016	1.53774	0.006597	0.181809	0.197061	0.168411	0.310727	0.445585
3,62333333	3.21707	3.13621	2.95569	7.21586	7.17545	6.65013	1.80974	0.867317	1.23848	1.87846	1.02294	1.53615	0.009319	0.182604	0.199158	0.168327	0.308187	0.447638
3,62666667	3.22162	3.14324	2.96002	7.2157	7.17171	6.65786	1.80945	0.868065	1.23853	1.8763	1.02899	1.54031	0.009902	0.181673	0.200552	0.169806	0.305156	0.447949
3,63	3.22451	3.1462	2.9624	7.21666	7.17539	6.66133	1.80828	0.868185	1.23331	1.87615	1.02309	1.53981	0.013561	0.183077	0.199574	0.168469	0.301291	0.447169
3,63333333	3.22978	3.14477	2.96673	7.21808	7.17404	6.66024	1.80866	0.868448	1.23359	1.87719	1.02824	1.53437	0.012289	0.18269	0.198696	0.170806	0.2976	0.448275
3,63666667	3.23388	3.15196	2.96859	7.21996	7.17537	6.66566	1.80965	0.867926	1.2394	1.87656	1.02047	1.53992	0.01276	0.185038	0.198044	0.172021	0.295592	0.448652
3,64	3.2377	3.15361	2.97399	7.22013	7.18081	6.66024	1.80874	0.868465	1.23444	1.87586	1.0209	1.53559	0.011551	0.186952	0.197565	0.173053	0.294625	0.450371
3,64333333	3.23985	3.1527	2.97491	7.22201	7.17822	6.6651	1.80979	0.870583	1.23514	1.87845	1.02758	1.54181	0.010057	0.188814	0.197617	0.172735	0.29339	0.449913
3,64666667	3.24311	3.15783	2.98167	7.22374	7.17906	6.66493	1.81178	0.872148	1.23374	1.87821	1.02461	1.53611	0.005818	0.189271	0.197326	0.172391	0.292168	0.451436
3,65	3.24615	3.16651	2.98155	7.22432	7.18131	6.66882	1.81031	0.86928	1.23306	1.87892	1.02782	1.5421	0.006124	0.190917	0.19847	0.171325	0.293814	0.450647
3,65333333	3.25119	3.16758	2.98764	7.22328	7.18303	6.66845	1.8101	0.870951	1.23746	1.87936	1.02686	1.53715	0.006572	0.191106	0.198494	0.172226	0.296396	0.450219
3,65666667	3.25548	3.16606	2.99057	7.225	7.18724	6.67565	1.81147	0.874125	1.23517	1.87863	1.02748	1.54319	0.007909	0.189381	0.198979	0.170627	0.299349	0.450567
3,66	3.26069	3.17158	2.99204	7.22473	7.17767	6.6702	1.81192	0.868372	1.2402	1.87803	1.02519	1.53931	0.009702	0.188144	0.200317	0.17206	0.305304	0.448394
3,66333333	3.265	3.17717	3.00366	7.22569	7.19235	6.67536	1.81214	0.868479	1.23572	1.87842	1.02463	1.53879	0.013055	0.186757	0.199851	0.172537	0.30785	0.449472
3,66666667	3.26843	3.17953	3.00646	7.22709	7.18773	6.67371	1.81216	0.869316	1.23242	1.8776	1.02538	1.53734	0.01413	0.187997	0.200299	0.172727	0.307795	0.450379
3,67	3.27235	3.17864	3.00894	7.22912	7.18516	6.6743	1.813	0.870981	1.23558	1.87869	1.02608	1.53833	0.013219	0.188044	0.200823	0.171128	0.304826	0.450362
3,67333333	3.27636	3.19044	3.00579	7.22984	7.18346	6.67496	1.81241	0.870444	1.23385	1.88197	1.03139	1.5416	0.014826	0.189203	0.199993	0.171695	0.300522	0.449321
3,67666667	3.27992	3.19094	3.01352	7.23216	7.18608	6.68136	1.81279	0.870972	1.23412	1.88132	1.03238	1.53902	0.011572	0.190187	0.198713	0.170004	0.294587	0.449549
3,68	3.28511	3.19126	3.01789	7.23114	7.18726	6.67486	1.81291	0.867545	1.23638	1.88322	1.02658	1.54102	0.007262	0.190928	0.199335	0.171114	0.292271	0.44931
3,68333333	3.28935	3.19569	3.01991	7.23287	7.19291	6.67949	1.81424	0.869473	1.22861	1.88443	1.02773	1.54275	0.006353	0.1901	0.197662	0.170088	0.290843	0.448583
3,68666667	3.28928	3.20381	3.02413	7.23449	7.19606	6.6828	1.81366	0.869532	1.23473	1.88424	1.03058	1.53621	0.006634	0.190668	0.197774	0.170094	0.291819	0.445989
3,69	3.291	3.20205	3.02189	7.23603	7.19027	6.67998	1.81283	0.871489	1.23581	1.88348	1.0284	1.53606	0.003717	0.190876	0.19985	0.170292	0.295838	0.448589
3,69333333	3.29309	3.20245	3.02891	7.23761	7.19555	6.68299	1.81221	0.867601	1.24048	1.88312	1.02832	1.53644	0.006242	0.191204	0.200049	0.171657	0.299967	0.446002
3,69666667	3.29825	3.20871	3.03381	7.2407	7.19564	6.68577	1.81352	0.870613	1.23371	1.88075	1.02926	1.53681	0.008362	0.192045	0.201961	0.171142	0.302743	0.447164
3,7	3.3033	3.21021	3.043	7.24019	7.19763	6.68694	1.8145	0.870672	1.23472	1.88089	1.02841	1.53833	0.007907	0.19227	0.203072	0.172796	0.305873	0.446818
3,70333333	3.30773	3.21399	3.04199	7.24025	7.19845	6.68978	1.81496	0.868489	1.23738	1.87869	1.03022	1.53918	0.006029	0.191195	0.201107	0.173779	0.305754	0.44835
3,70666667	3.31212	3.22053	3.04601	7.24045	7.19961	6.68916	1.81676	0.867931	1.23408	1.87666	1.02393	1.54189	0.007473	0.191067	0.198602	0.17199	0.302044	0.450357
3,71	3.31751	3.21913	3.04801	7.242	7.19954	6.68825	1.81749	0.873906	1.23639	1.87747	1.03274	1.53675	0.005894	0.189644	0.198116	0.170677	0.296749	0.449501
3,71333333	3.32139	3.21708	3.05091	7.24306	7.20294	6.69015	1.81545	0.866408	1.23194	1.87811	1.02772	1.54017	0.005605	0.188862	0.197517	0.170497	0.293324	0.449773
3,71666667	3.32322	3.22497	3.05181	7.24503	7.20166	6.69566	1.81495	0.873879	1.23394	1.87734	1.02877	1.53617	0.006133	0.189082	0.196294	0.169001	0.290552	0.450179
3,72	3.32888	3.2323	3.06106	7.24692	7.20477	6.69662	1.81456	0.869076	1.23379	1.87914	1.02748	1.53762	0.0065	0.188863	0.198379	0.168328	0.291863	0.449894
3,72333333	3.33432	3.23794	3.06296	7.24933	7.19888	6.69675	1.8144	0.870782	1.23433	1.88079	1.0291	1.53927	0.005995	0.189484	0.198902	0.170802	0.296869	0.448781
3,72666667	3.33875	3.23884	3.06681	7.24974	7.20727	6.69697	1.81352	0.87728	1.23404	1.88171	1.02747	1.53824	0.007348	0.188473	0.199278	0.170262	0.303093	0.447081
3,73	3.34322	3.24022	3.06556	7.25062	7.20842	6.69779	1.81496	0.867509	1.23727	1.88274	1.02779	1.54064	0.007289	0.188503	0.198936	0.169122	0.307765	0.448293
3,73333333	3.34846	3.23863	3.07548	7.25147	7.20559	6.7037	1.81616	0.86932	1.23222	1.88368	1.02675	1.53699	0.00707	0.188374	0.200601	0.16875	0.310038	0.447569
3,73666667	3.35093	3.24886	3.07609	7.25169	7.20477	6.70234	1.81793	0.868745	1.23273	1.88344	1.02952	1.53789	0.005727	0.187664	0.20075	0.169912	0.308946	0.446542
3,74	3.35454	3.24422	3.07476	7.2507	7.21068	6.7043	1.81814	0.871326	1.23879	1.8837	1.03392	1.53734	0.00486	0.18819	0.20045	0.168978	0.304404	0.446758
3,74333333	3.35692	3.24793	3.08415	7.2524	7.20959	6.7048	1.81919	0.868884	1.23347	1.885	1.02857	1.5353	0.004823	0.190463	0.198903	0.168659	0.300191	0.448829
3,74666667	3.35999	3.25697	3.08683	7.25194	7.20687	6.70026	1.81843	0.868108	1.23132	1.88434	1.03089	1.53502	0.002853	0.19085	0.197118	0.170305	0.295235	0.447985
3,75	3.36441	3.25969	3.08968	7.25483	7.21109	6.70356	1.81621	0.87292	1.23121	1.88486	1.03076	1.5396	0.005569	0.190942	0.195996	0.170785	0.293622	0.448234
3,75333333	3.36867	3.26287	3.09019	7.25484	7.21112	6.70128	1.8159	0.868125	1.23704	1.88421	1.02712	1.53939	0.005718	0.192578	0.195728	0.169792	0.295181	0.448792
3,75666667	3.37277	3.26507	3.09803	7.25745	7.21124	6.70596	1.81539	0.873329	1.23174	1.8835	1.02993	1.53988	0.006497	0.191324	0.197166	0.169528	0.299003	0.448013
3,76	3.37605	3.26829	3.10116	7.25695	7.21707	6.70668	1.81506	0.87006	1.23141	1.88275	1.0333	1.54078	0.005014	0.1915	0.198022	0.171509	0.301378	0.447167
3,76333333	3.37805	3.26942	3.10597	7.25882	7.21185	6.70835	1.8163	0.868814	1.2333	1.88262	1.02659	1.53597	0.005986	0.191613	0.201357	0.16981	0.305265	0.446099
3,76666667	3.38039	3.2751	3.10895	7.25755	7.21955	6.70981	1.81808	0.869001	1.23091	1.88262	1.03364	1.53998	0.002755	0.191003	0.203844	0.170527	0.305426	0.446151
3,77	3.38314	3.27833	3.10752	7.25982	7.22215	6.70655	1.81771	0.869017	1.23401	1.88404	1.03066	1.53465	0.004464	0.190246	0.203598	0.171202	0.301571	0.445236
3,77333333	3.38608	3.27814	3.11092	7.26074	7.2157	6.71213	1.81969	0.873072	1.23491	1.88527	1.03175	1.53646	0.00292	0.191004	0.203396	0.173642	0.297267	0.44602
3,77666667	3.38831	3.29012	3.11572	7.26305	7.22281	6.71426	1.82025	0.872349	1.22933	1.88367	1.02699	1.53691	0.003613	0.189607	0.205089	0.171493	0.296317	0.447986
3,78	3.39392	3.28313	3.12511	7.26484	7.22348	6.71116	1.82047	0.871986	1.23316	1.88342	1.03053	1.53855	0.002585	0.189025	0.203664	0.172703	0.297265	0.447774
3,78333333	3.3978	3.28759	3.12527	7.26615	7.22241	6.70865	1.81968	0.869433	1.2352	1.88283	1.03412	1.54343	0.003236	0.190655	0.200145	0.172163	0.298206	0.447229
3,78666667	3.4038	3.29218	3.12566	7.26612	7.22793	6.7233	1.81933	0.870186	1.22868	1.88461	1.03167	1.53784	0.003586	0.192145	0.199719	0.172152	0.298674	0.447337
3,79	3.40718	3.29596	3.13003	7.26604	7.22586	6.72138	1.81872	0.868659	1.23283	1.8839	1.0304	1.54117	0.004348	0.192275	0.198104	0.171018	0.299762	0.444644
3,79333333	3.41341	3.29834	3.13107	7.26575	7.2245	6.71483	1.81815	0.871263	1.23169	1.8854	1.03611	1.53728	0.005263	0.194686	0.197302	0.171649	0.300766	0.442787
3,79666667	3.41573	3.29565	3.1414	7.26674	7.22686	6.72109	1.81876	0.871308	1.23463	1.88542	1.02678	1.53571	0.005474	0.194835	0.19744	0.170421	0.299871	0.441824
3,8	3.42091	3.30323	3.14438	7.2684	7.22756	6.72106	1.81937	0.87415	1.23961	1.88503	1.02849	1.53662	0.007311	0.193729	0.197567	0.169597	0.29756	0.442118
3,80333333	3.4245	3.31008	3.14382	7.2689	7.22852	6.71737	1.82012	0.872033	1.2368	1.88233	1.03089	1.53864	0.008996	0.193133	0.197024	0.168819	0.298205	0.443384
3,80666667	3.42876	3.31013	3.15065	7.27036	7.23458	6.72636	1.81941	0.872495	1.23601	1.88243	1.0309	1.53752	0.009847	0.19132	0.198234	0.166384	0.300279	0.443549
3,81	3.4341	3.31074	3.15537	7.27257	7.2355	6.72658	1.81938	0.871063	1.23442	1.88016	1.03596	1.53441	0.009276	0.189714	0.19943	0.166849	0.300636	0.445763
3,81333333	3.43846	3.31794	3.15767	7.27298	7.23437	6.72552	1.81809	0.872648	1.23799	1.88001	1.0345	1.53539	0.010132	0.189668	0.198605	0.167421	0.296898	0.446392
3,81666667	3.44064	3.31779	3.15345	7.27407	7.23506	6.72575	1.81779	0.87327	1.23542	1.87985	1.03121	1.53778	0.006669	0.18985	0.200222	0.169531	0.296231	0.44686
3,82	3.44474	3.32103	3.16309	7.27542	7.23643	6.72852	1.81835	0.869985	1.23106	1.88221	1.03059	1.53872	0.00542	0.188921	0.201254	0.170559	0.300064	0.446816
3,82333333	3.44741	3.32634	3.17078	7.27702	7.23336	6.72966	1.81948	0.872082	1.23641	1.87982	1.0342	1.53888	0.006785	0.190631	0.201842	0.171785	0.29961	0.446544
3,82666667	3.45009	3.32696	3.16903	7.27781	7.23754	6.7317	1.81987	0.871433	1.23593	1.88227	1.02759	1.54001	0.007493	0.190546	0.200631	0.171742	0.294917	0.446383
3,83	3.45561	3.33266	3.17623	7.27884	7.24771	6.73397	1.8212	0.871558	1.23535	1.88211	1.03071	1.54045	0.011004	0.189948	0.201226	0.17288	0.295205	0.445569
3,83333333	3.46068	3.32725	3.17443	7.27838	7.2419	6.73571	1.82234	0.86941	1.22831	1.88131	1.03254	1.53742	0.012033	0.191391	0.200673	0.169662	0.300984	0.445747
3,83666667	3.46522	3.33349	3.17885	7.28176	7.23931	6.73962	1.82143	0.871946	1.23504	1.87935	1.02976	1.54065	0.014488	0.191336	0.201597	0.170658	0.297142	0.445647
3,84	3.47051	3.3423	3.18523	7.28324	7.24164	6.73486	1.82149	0.869063	1.22464	1.88103	1.02582	1.53622	0.01453	0.192387	0.202476	0.170403	0.294553	0.444563
3,84333333	3.47471	3.34343	3.18645	7.28557	7.24492	6.73693	1.82122	0.86693	1.2322	1.87931	1.03084	1.53793	0.013886	0.192051	0.202141	0.170591	0.299892	0.445138
3,84666667	3.47818	3.34759	3.1937	7.28676	7.24259	6.73865	1.82147	0.87431	1.23573	1.88118	1.02936	1.53841	0.01018	0.191943	0.200064	0.171976	0.302785	0.443201
3,85	3.48046	3.35229	3.19413	7.28873	7.24625	6.73842	1.82164	0.868005	1.23491	1.88397	1.0273	1.53691	0.00981	0.191139	0.202048	0.174362	0.296481	0.441652
3,85333333	3.48247	3.3517	3.19327	7.28832	7.24712	6.73669	1.82338	0.868069	1.23374	1.88683	1.03519	1.53759	0.006644	0.192841	0.201574	0.171767	0.29623	0.443422
3,85666667	3.48625	3.36089	3.19715	7.28886	7.25247	6.74317	1.82392	0.871364	1.2363	1.88964	1.03153	1.5396	0.005804	0.191244	0.200028	0.172124	0.300933	0.442488
3,86	3.48883	3.35817	3.20205	7.2891	7.24709	6.73763	1.82548	0.871597	1.23108	1.89235	1.03122	1.54177	0.006525	0.193696	0.199572	0.171934	0.299176	0.444528
3,86333333	3.49391	3.35639	3.21106	7.29003	7.24917	6.74237	1.82351	0.871717	1.23735	1.88934	1.02901	1.53946	0.009214	0.196894	0.203682	0.169538	0.295507	0.445351
3,86666667	3.49757	3.3615	3.20448	7.29195	7.25118	6.74389	1.82362	0.870706	1.23454	1.88804	1.03431	1.53522	0.011173	0.195872	0.202053	0.16897	0.297523	0.446403
3,87	3.50298	3.36762	3.21502	7.29275	7.25566	6.74806	1.8228	0.869405	1.23168	1.88479	1.03275	1.53652	0.014071	0.195279	0.201865	0.170418	0.300839	0.446063
3,87333333	3.50629	3.36882	3.21968	7.29392	7.24909	6.7431	1.82128	0.874178	1.23235	1.88325	1.0356	1.53994	0.013674	0.197076	0.201909	0.171429	0.296993	0.444991
3,87666667	3.50928	3.37234	3.21561	7.29469	7.25313	6.74216	1.82067	0.871068	1.23413	1.88059	1.03095	1.53638	0.013593	0.195974	0.203988	0.169832	0.293992	0.444743
3,88	3.51118	3.37791	3.22013	7.29509	7.25021	6.74818	1.82248	0.8695	1.2333	1.87961	1.02999	1.54192	0.012158	0.194629	0.20337	0.17108	0.298266	0.444627
3,88333333	3.51377	3.37579	3.22637	7.29537	7.25831	6.75316	1.82298	0.872818	1.22733	1.8784	1.03096	1.53425	0.010659	0.194357	0.204947	0.171795	0.300798	0.443424
3,88666667	3.51427	3.37677	3.22649	7.2978	7.2564	6.75079	1.82367	0.872476	1.23341	1.87877	1.0311	1.53981	0.008597	0.194592	0.204951	0.171451	0.297419	0.445615
3,89	3.51775	3.37934	3.2349	7.29906	7.25444	6.74685	1.82428	0.873652	1.2358	1.87758	1.03159	1.53909	0.006354	0.192635	0.205639	0.170262	0.296704	0.444375
3,89333333	3.52167	3.38907	3.23715	7.29998	7.26211	6.75092	1.82338	0.870846	1.23491	1.87993	1.03194	1.54129	0.006084	0.192843	0.204438	0.171016	0.300706	0.443491
3,89666667	3.52577	3.38759	3.2378	7.30182	7.25465	6.74886	1.82203	0.872999	1.23067	1.88243	1.03725	1.54007	0.009461	0.19012	0.203043	0.170994	0.300261	0.443747
3,9	3.5294	3.39288	3.23772	7.30147	7.26087	6.75625	1.82245	0.867606	1.23477	1.88401	1.0324	1.53565	0.010764	0.191113	0.200221	0.171053	0.295558	0.441269
3,90333333	3.53522	3.38929	3.24545	7.30165	7.26143	6.75968	1.82252	0.871707	1.23179	1.88483	1.02883	1.54195	0.01221	0.190995	0.201371	0.169176	0.296789	0.443352
3,90666667	3.53774	3.39821	3.24779	7.3006	7.26362	6.75704	1.82352	0.871496	1.22945	1.88538	1.0373	1.53763	0.015897	0.192401	0.201689	0.169758	0.301914	0.440064
3,91	3.54019	3.39849	3.24737	7.30164	7.2723	6.75847	1.82485	0.873741	1.23366	1.88468	1.03606	1.53965	0.015296	0.190789	0.202489	0.171268	0.300093	0.441483
3,91333333	3.54374	3.4058	3.2513	7.30284	7.26487	6.76195	1.82824	0.869627	1.23042	1.88339	1.03253	1.53879	0.01072	0.194473	0.203119	0.171322	0.297389	0.441727
3,91666667	3.5487	3.4055	3.25704	7.30442	7.26725	6.75998	1.82945	0.871877	1.23389	1.88375	1.03259	1.54206	0.011624	0.192728	0.205472	0.169488	0.300802	0.437444
3,92	3.55091	3.4053	3.26243	7.30474	7.26544	6.7585	1.83045	0.872286	1.23137	1.88508	1.03056	1.53429	0.008866	0.19445	0.202764	0.171949	0.303122	0.440495
3,92333333	3.55487	3.41228	3.26594	7.30788	7.26172	6.76261	1.82867	0.868618	1.2304	1.88478	1.03253	1.53481	0.007544	0.192179	0.201715	0.171328	0.298708	0.44003
3,92666667	3.55998	3.41824	3.27053	7.3085	7.26911	6.76059	1.82959	0.870931	1.23063	1.88607	1.03066	1.53588	0.007266	0.193926	0.202133	0.170692	0.296691	0.436727
3,93	3.56486	3.41787	3.27062	7.30825	7.27148	6.76354	1.82695	0.872451	1.23472	1.88571	1.03297	1.53847	0.008651	0.194301	0.201364	0.170445	0.299898	0.441375
3,93333333	3.56838	3.42162	3.2698	7.30998	7.26673	6.76681	1.82523	0.870393	1.2326	1.88551	1.03188	1.53595	0.008313	0.195042	0.200581	0.172437	0.302463	0.438712
3,93666667	3.57241	3.42653	3.27807	7.31141	7.26709	6.76931	1.82425	0.872949	1.22853	1.88344	1.03122	1.54026	0.010718	0.192165	0.201754	0.171718	0.29771	0.439096
3,94	3.57646	3.42627	3.28125	7.31081	7.27336	6.76742	1.82675	0.870045	1.23265	1.88205	1.03498	1.54168	0.012427	0.193528	0.20091	0.170333	0.297575	0.44298
3,94333333	3.58081	3.42934	3.28827	7.31212	7.27705	6.76503	1.82653	0.870654	1.23351	1.87904	1.03251	1.53663	0.014065	0.194631	0.199715	0.168795	0.301724	0.440006
3,94666667	3.58397	3.43199	3.28518	7.31456	7.27287	6.7713	1.8276	0.87289	1.23159	1.87925	1.0352	1.53431	0.013094	0.194105	0.201716	0.169013	0.29978	0.442656
3,95	3.58733	3.43538	3.28533	7.31647	7.27479	6.77422	1.82717	0.868196	1.2332	1.87996	1.03498	1.53587	0.014157	0.192942	0.201905	0.168228	0.294606	0.441393
3,95333333	3.59196	3.43428	3.28944	7.31615	7.27736	6.77559	1.82651	0.871046	1.23629	1.88108	1.03029	1.53657	0.014133	0.194185	0.203873	0.168187	0.296206	0.441392
3,95666667	3.59474	3.43861	3.29911	7.31875	7.27395	6.77462	1.82531	0.86827	1.23476	1.88308	1.03229	1.53682	0.013808	0.197149	0.205426	0.169116	0.299066	0.440948
3,96	3.59795	3.43799	3.30404	7.31897	7.27663	6.77817	1.82484	0.877068	1.22946	1.88486	1.0329	1.53999	0.013083	0.196687	0.207602	0.170221	0.295451	0.440189
3,96333333	3.60132	3.44304	3.30175	7.32011	7.27857	6.77587	1.82236	0.871098	1.23141	1.88572	1.0353	1.5342	0.01333	0.196433	0.20946	0.168681	0.293255	0.443079
3,96666667	3.6044	3.44905	3.30585	7.32048	7.28105	6.77799	1.82168	0.86999	1.23119	1.88597	1.03025	1.5315	0.013196	0.199043	0.209446	0.169214	0.296246	0.443371
3,97	3.60697	3.45191	3.30631	7.32172	7.28396	6.77769	1.82359	0.869423	1.2314	1.88522	1.03099	1.53451	0.01134	0.201036	0.209974	0.169588	0.298845	0.439492
3,97333333	3.61135	3.45419	3.31192	7.32258	7.28346	6.77962	1.82391	0.874194	1.23142	1.88449	1.03295	1.54227	0.00855	0.199037	0.21022	0.169726	0.294245	0.444446
3,97666667	3.61484	3.46003	3.31713	7.32568	7.28414	6.77994	1.82354	0.871973	1.22927	1.88489	1.03485	1.53819	0.007507	0.198582	0.208984	0.169672	0.294013	0.439948
3,98	3.61962	3.46354	3.3218	7.32629	7.28337	6.77929	1.82763	0.874685	1.22784	1.88691	1.0336	1.53733	0.010264	0.199256	0.208708	0.169689	0.298276	0.438826
3,98333333	3.6227	3.45763	3.31898	7.32779	7.28173	6.78103	1.82918	0.872089	1.23534	1.88337	1.03289	1.53583	0.006553	0.199117	0.206807	0.170913	0.299148	0.441732
3,98666667	3.62682	3.46708	3.32189	7.33062	7.28648	6.781	1.82803	0.873416	1.22806	1.88402	1.0321	1.53885	0.00839	0.195901	0.205419	0.169242	0.296834	0.435682
3,99	3.62896	3.46865	3.32593	7.33065	7.28848	6.78549	1.82771	0.874235	1.23176	1.88635	1.03346	1.53339	0.010936	0.195498	0.205408	0.169299	0.298471	0.43929
3,99333333	3.63234	3.46756	3.3314	7.33047	7.28765	6.78726	1.82882	0.874227	1.23633	1.8875	1.03318	1.53809	0.012796	0.195869	0.204826	0.169524	0.301314	0.441949
3,99666667	3.6348	3.46956	3.33281	7.3319	7.28835	6.78462	1.82668	0.872205	1.22967	1.88654	1.03229	1.53952	0.012141	0.195995	0.202086	0.169621	0.302096	0.436942
4	3.63811	3.47432	3.33648	7.33131	7.29334	6.78321	1.82752	0.871844	1.23185	1.88948	1.03829	1.53846	0.016308	0.197776	0.204149	0.167599	0.297877	0.442761
4,00333333	3.64169	3.47973	3.33911	7.33283	7.29134	6.78911	1.82831	0.871217	1.22839	1.89061	1.03151	1.53037	0.01435	0.198048	0.20357	0.170873	0.297657	0.441745
4,00666667	3.64524	3.48019	3.34349	7.3341	7.29428	6.79186	1.82853	0.873064	1.22887	1.88985	1.03753	1.53778	0.011283	0.19735	0.203134	0.170662	0.299689	0.440027
4,01	3.64757	3.4853	3.34979	7.33551	7.29275	6.79206	1.82883	0.872776	1.22564	1.88728	1.03645	1.5387	0.008925	0.197011	0.202823	0.170218	0.300413	0.443115
4,01333333	3.65146	3.4863	3.35274	7.33511	7.29349	6.7948	1.83124	0.872625	1.23115	1.887	1.03491	1.54394	0.010253	0.195622	0.202562	0.173595	0.296208	0.44108
4,01666667	3.65395	3.49023	3.35321	7.33723	7.29394	6.7935	1.83081	0.872079	1.23441	1.88534	1.03554	1.53823	0.007566	0.194344	0.201535	0.174558	0.296423	0.442469
4,02	3.65496	3.48701	3.35665	7.33698	7.29784	6.79365	1.83067	0.872882	1.22792	1.88372	1.03522	1.53919	0.009994	0.196631	0.202361	0.172928	0.29858	0.441273
4,02333333	3.65603	3.4914	3.36048	7.3386	7.29364	6.79615	1.8327	0.871783	1.22818	1.88282	1.03567	1.53464	0.012604	0.19806	0.20393	0.174005	0.300062	0.439212
4,02666667	3.66012	3.491	3.36168	7.33968	7.29257	6.79169	1.83235	0.868123	1.22769	1.88325	1.03499	1.53817	0.014195	0.199472	0.206056	0.174696	0.297105	0.441067
4,03	3.66498	3.50332	3.36538	7.34126	7.29701	6.79549	1.83041	0.870137	1.22673	1.8824	1.03422	1.53696	0.015066	0.198919	0.20798	0.173039	0.297135	0.438756
4,03333333	3.67047	3.50184	3.3704	7.34191	7.29721	6.80072	1.83013	0.873877	1.22988	1.88477	1.03924	1.53996	0.018674	0.20025	0.208849	0.171649	0.300112	0.438505
4,03666667	3.67701	3.50191	3.36924	7.34286	7.29957	6.80224	1.83065	0.876951	1.23224	1.88525	1.03232	1.54109	0.017145	0.200436	0.209402	0.171452	0.302026	0.442219
4,04	3.68289	3.50562	3.37855	7.34341	7.2996	6.79892	1.82968	0.871777	1.22863	1.8847	1.03672	1.53748	0.015384	0.199097	0.209149	0.169131	0.298167	0.437147
4,04333333	3.686	3.51026	3.377	7.34259	7.30292	6.79978	1.83056	0.874537	1.23336	1.88404	1.03532	1.53763	0.016601	0.19883	0.207024	0.168686	0.297003	0.439823
4,04666667	3.69043	3.5162	3.37891	7.34265	7.30115	6.8039	1.8303	0.873107	1.23002	1.88716	1.03234	1.53781	0.018401	0.201064	0.205634	0.169303	0.298914	0.436954
4,05	3.69414	3.5177	3.38423	7.34315	7.30318	6.80214	1.82925	0.872166	1.23163	1.88564	1.03528	1.54094	0.016477	0.199326	0.207726	0.170595	0.300816	0.433579
4,05333333	3.69718	3.51972	3.38892	7.34439	7.3108	6.80538	1.82917	0.874423	1.23078	1.88562	1.03467	1.53847	0.01963	0.197261	0.20598	0.169292	0.297037	0.440194
4,05666667	3.70037	3.51597	3.39566	7.34534	7.30631	6.80224	1.82833	0.871055	1.23077	1.88346	1.03704	1.53772	0.021076	0.202453	0.204887	0.171241	0.296731	0.437164
4,06	3.70322	3.52674	3.39596	7.34678	7.30825	6.80443	1.82777	0.875477	1.23211	1.88466	1.03312	1.54395	0.021992	0.201363	0.206047	0.171415	0.298111	0.43623
4,06333333	3.70408	3.52699	3.3962	7.34982	7.30959	6.81255	1.82863	0.873192	1.23039	1.88125	1.03164	1.53975	0.017093	0.201499	0.20687	0.169094	0.299991	0.441236
4,06666667	3.70969	3.52983	3.39849	7.34959	7.30944	6.81204	1.82923	0.873451	1.23131	1.88102	1.03378	1.54175	0.016269	0.201386	0.205533	0.168807	0.299155	0.436
4,07	3.71217	3.5345	3.40143	7.34893	7.30981	6.80979	1.82812	0.87326	1.23276	1.88105	1.0338	1.53533	0.016333	0.202056	0.206173	0.171485	0.296676	0.438969
4,07333333	3.71628	3.53599	3.40535	7.34905	7.30782	6.80715	1.82841	0.871693	1.23092	1.88292	1.03659	1.53498	0.015943	0.199805	0.206718	0.171686	0.297511	0.44048
4,07666667	3.72044	3.54056	3.40611	7.3497	7.31421	6.81388	1.82911	0.873195	1.22974	1.88298	1.03948	1.53604	0.013458	0.201524	0.205798	0.172687	0.298244	0.435721
4,08	3.728	3.53999	3.41634	7.35094	7.31156	6.80925	1.82884	0.874802	1.23141	1.88659	1.03746	1.54132	0.01687	0.201157	0.204184	0.173796	0.29837	0.44155
4,08333333	3.7288	3.54138	3.4133	7.35325	7.3134	6.81309	1.82878	0.87386	1.22942	1.88717	1.035	1.53514	0.020397	0.202377	0.203757	0.172861	0.296756	0.438563
4,08666667	3.73198	3.54671	3.4182	7.35483	7.3168	6.81546	1.83055	0.871671	1.22763	1.88441	1.03722	1.53819	0.018461	0.202382	0.204222	0.170347	0.298107	0.434377
4,09	3.73584	3.55042	3.41717	7.35736	7.31305	6.81553	1.83066	0.871375	1.22775	1.88496	1.03394	1.53924	0.020818	0.202317	0.204387	0.171215	0.29909	0.438218
4,09333333	3.73816	3.55218	3.42516	7.3604	7.32035	6.81564	1.82907	0.878848	1.22795	1.88621	1.03505	1.53758	0.022551	0.200648	0.20382	0.171175	0.301603	0.434595
4,09666667	3.73981	3.55381	3.42148	7.36185	7.31662	6.81496	1.82938	0.875243	1.23002	1.88321	1.03568	1.53946	0.019082	0.20128	0.205935	0.171182	0.299586	0.436326
4,1	3.74398	3.55847	3.42571	7.36309	7.31708	6.8122	1.82947	0.87254	1.2261	1.88306	1.03436	1.53809	0.016279	0.20189	0.206368	0.172563	0.297368	0.437379
4,10333333	3.74677	3.55824	3.4291	7.36642	7.3275	6.8183	1.82963	0.873799	1.23054	1.88634	1.03544	1.53786	0.019532	0.201573	0.207812	0.172527	0.298654	0.435852
4,10666667	3.74821	3.56083	3.43497	7.36646	7.3233	6.81985	1.83102	0.873554	1.22508	1.88824	1.03632	1.53558	0.017916	0.199149	0.20842	0.172048	0.299984	0.440019
4,11	3.75225	3.56184	3.43977	7.36578	7.32427	6.82475	1.832	0.873567	1.23262	1.88622	1.03367	1.53678	0.018049	0.200978	0.209568	0.17206	0.299126	0.438538
4,11333333	3.75646	3.56772	3.44447	7.36595	7.32006	6.82686	1.83186	0.872574	1.23116	1.88861	1.03482	1.53825	0.017851	0.199597	0.208518	0.172904	0.296854	0.438233
4,11666667	3.75739	3.56894	3.44274	7.3676	7.32023	6.82412	1.83253	0.873374	1.23187	1.88979	1.03763	1.53751	0.018293	0.198335	0.207871	0.171315	0.29721	0.440434
4,12	3.76009	3.57247	3.44789	7.36678	7.32877	6.82166	1.83144	0.86946	1.23339	1.88866	1.03814	1.53893	0.016781	0.199104	0.207512	0.17221	0.29842	0.434641
4,12333333	3.76427	3.57617	3.44868	7.36674	7.33354	6.827	1.83048	0.872961	1.23202	1.88825	1.03563	1.54036	0.019246	0.199408	0.205789	0.172085	0.299705	0.435693
4,12666667	3.76729	3.57567	3.45292	7.36864	7.32904	6.82235	1.8313	0.876658	1.22981	1.88932	1.03808	1.53642	0.018902	0.198394	0.206682	0.170597	0.297089	0.437091
4,13	3.7711	3.57468	3.45508	7.37059	7.32746	6.82631	1.83056	0.876033	1.2289	1.88619	1.03164	1.53292	0.021621	0.198729	0.207325	0.169529	0.29724	0.431988
4,13333333	3.77595	3.57974	3.45507	7.37012	7.32887	6.83072	1.83035	0.871244	1.23363	1.88645	1.03588	1.53819	0.021178	0.19823	0.208037	0.169076	0.297743	0.436162
4,13666667	3.77967	3.58343	3.45778	7.3711	7.33142	6.82966	1.8299	0.873374	1.22845	1.88768	1.0371	1.53684	0.019499	0.196646	0.207348	0.17002	0.298965	0.43562
4,14	3.78143	3.58811	3.46524	7.37185	7.33184	6.8283	1.83002	0.874275	1.23051	1.8872	1.03685	1.53538	0.017852	0.198355	0.208835	0.169625	0.296409	0.432686
4,14333333	3.78445	3.59039	3.47024	7.37268	7.32824	6.83352	1.82864	0.875904	1.23094	1.88693	1.03628	1.54032	0.017616	0.199279	0.210173	0.169407	0.295979	0.438698
4,14666667	3.78789	3.59391	3.46972	7.37189	7.33657	6.83046	1.82982	0.872532	1.22775	1.88849	1.0344	1.53183	0.014706	0.198799	0.208689	0.169509	0.296922	0.431972
4,15	3.79142	3.59496	3.47517	7.37496	7.33473	6.8355	1.82971	0.873558	1.23189	1.88744	1.03695	1.52994	0.015459	0.201246	0.210095	0.171651	0.29944	0.435216
4,15333333	3.79564	3.59548	3.4721	7.37601	7.33576	6.83124	1.82969	0.873685	1.23426	1.8875	1.03418	1.53577	0.01502	0.203507	0.207728	0.171004	0.297472	0.437428
4,15666667	3.79918	3.59914	3.47996	7.37673	7.33778	6.83458	1.8296	0.874028	1.23034	1.88488	1.03528	1.53788	0.014617	0.202647	0.20557	0.169956	0.295295	0.433145
4,16	3.80254	3.60294	3.48238	7.37873	7.33544	6.83599	1.83019	0.871654	1.22935	1.88533	1.03831	1.53411	0.017668	0.202218	0.202658	0.170991	0.295499	0.435421
4,16333333	3.80252	3.60683	3.48519	7.38041	7.33451	6.8358	1.8299	0.873772	1.22855	1.8868	1.03576	1.53671	0.021533	0.202968	0.204022	0.171083	0.298824	0.436998
4,16666667	3.80691	3.60551	3.4907	7.37999	7.33765	6.84081	1.82967	0.87317	1.23069	1.88926	1.03305	1.53492	0.023773	0.200853	0.201161	0.170571	0.298019	0.434409
4,17	3.80813	3.61109	3.49179	7.37982	7.33646	6.84359	1.83022	0.873186	1.2275	1.88858	1.03313	1.54007	0.024001	0.198698	0.204103	0.172245	0.295955	0.439246
4,17333333	3.81281	3.61285	3.49292	7.38271	7.33843	6.84211	1.82996	0.8724	1.22848	1.89201	1.03713	1.53702	0.024744	0.199489	0.206328	0.173875	0.29735	0.435997
4,17666667	3.81607	3.61615	3.49329	7.38265	7.33946	6.84501	1.83057	0.869714	1.23255	1.89284	1.03633	1.53813	0.02554	0.199438	0.206549	0.173436	0.299879	0.434199
4,18	3.82011	3.62239	3.49936	7.38305	7.3441	6.84334	1.8311	0.873536	1.22892	1.89071	1.04134	1.53556	0.022914	0.201314	0.205089	0.171512	0.299326	0.439603
4,18333333	3.82153	3.61905	3.50512	7.38399	7.3387	6.84502	1.83129	0.875824	1.22861	1.88884	1.03497	1.53622	0.017219	0.201889	0.206627	0.1713	0.296168	0.431737
4,18666667	3.82564	3.62215	3.50264	7.38543	7.34247	6.84979	1.83171	0.87458	1.22955	1.89182	1.03725	1.53959	0.018252	0.20534	0.20539	0.16967	0.296237	0.434652
4,19	3.82864	3.6193	3.51056	7.38544	7.34153	6.84877	1.8327	0.874184	1.22902	1.89199	1.0371	1.53194	0.018261	0.206205	0.20531	0.169637	0.298293	0.438311
4,19333333	3.83131	3.63069	3.50986	7.38587	7.34844	6.84728	1.8328	0.873262	1.23026	1.88972	1.03937	1.53987	0.015431	0.205328	0.208037	0.171074	0.297953	0.433169
4,19666667	3.83477	3.62621	3.51177	7.38798	7.34657	6.84919	1.83402	0.873663	1.23064	1.88998	1.03663	1.53492	0.014118	0.203511	0.210655	0.172282	0.294093	0.438313
4,2	3.83838	3.6325	3.51658	7.38734	7.3509	6.84826	1.83423	0.876946	1.23011	1.89088	1.03663	1.533	0.018258	0.205051	0.210774	0.172704	0.295627	0.439406
4,20333333	3.84126	3.633	3.52022	7.3896	7.34546	6.84701	1.83303	0.876041	1.23296	1.88753	1.03999	1.53615	0.017172	0.20413	0.212222	0.172668	0.299378	0.433875
4,20666667	3.844	3.63608	3.52084	7.39231	7.35096	6.85043	1.83193	0.869959	1.22581	1.88688	1.03612	1.53843	0.017711	0.20449	0.212796	0.173025	0.298653	0.44102
4,21	3.84703	3.63903	3.5269	7.39356	7.35092	6.84795	1.83117	0.875202	1.23022	1.88725	1.0411	1.53782	0.020709	0.205718	0.211532	0.171242	0.295879	0.439549
4,21333333	3.85265	3.64302	3.53369	7.39494	7.35272	6.85283	1.83053	0.873283	1.2321	1.88784	1.03727	1.53372	0.025389	0.206438	0.210766	0.171048	0.296557	0.430777
4,21666667	3.85528	3.65132	3.52588	7.39666	7.35032	6.85142	1.83172	0.876531	1.22813	1.88718	1.03708	1.53666	0.025349	0.204488	0.210974	0.170412	0.299231	0.439729
4,22	3.85909	3.64511	3.52922	7.39698	7.34966	6.86016	1.83346	0.873149	1.2312	1.88849	1.03477	1.54089	0.027088	0.206627	0.209723	0.169334	0.299883	0.432169
4,22333333	3.86204	3.65076	3.5369	7.39581	7.35682	6.85443	1.83517	0.871556	1.23036	1.8897	1.03761	1.53466	0.029339	0.207174	0.209183	0.169487	0.297638	0.425882
4,22666667	3.86661	3.64901	3.53838	7.39594	7.35601	6.85859	1.83656	0.872098	1.23125	1.88925	1.03765	1.53472	0.025837	0.206464	0.209476	0.17045	0.298397	0.435067
4,23	3.8679	3.65277	3.54258	7.39566	7.35966	6.85897	1.83748	0.874605	1.22718	1.89048	1.03732	1.5336	0.026059	0.209034	0.209927	0.171202	0.300687	0.430317
4,23333333	3.87154	3.65415	3.54597	7.39739	7.36258	6.85867	1.83772	0.875205	1.22463	1.88795	1.03678	1.5368	0.025246	0.211399	0.210202	0.171694	0.301775	0.425653
4,23666667	3.87313	3.66078	3.54743	7.39821	7.35971	6.85949	1.83882	0.873389	1.22569	1.88684	1.0341	1.53733	0.027414	0.211477	0.212106	0.172739	0.297666	0.438987
4,24	3.877	3.66071	3.54709	7.39983	7.35754	6.86242	1.83797	0.875756	1.23134	1.88636	1.03516	1.5404	0.026935	0.211081	0.212112	0.172468	0.297804	0.433288
4,24333333	3.87817	3.66366	3.55829	7.40048	7.35775	6.86682	1.83719	0.873815	1.22923	1.88828	1.04106	1.53537	0.028595	0.211753	0.212149	0.171199	0.300235	0.427638
4,24666667	3.88332	3.66576	3.54949	7.40273	7.35997	6.86252	1.83603	0.874857	1.22684	1.89018	1.03879	1.53669	0.027065	0.209006	0.212332	0.171256	0.301066	0.438444
4,25	3.88592	3.67223	3.55881	7.40381	7.3587	6.86484	1.83618	0.872589	1.2324	1.89265	1.03896	1.53743	0.027146	0.208426	0.211591	0.1733	0.295833	0.431719
4,25333333	3.88896	3.67023	3.56438	7.40371	7.365	6.86365	1.83538	0.874981	1.22586	1.89513	1.04059	1.53533	0.024743	0.208169	0.209022	0.173937	0.294917	0.428878
4,25666667	3.89045	3.67386	3.56084	7.40358	7.36324	6.86585	1.83669	0.876396	1.22925	1.89324	1.03621	1.53353	0.022992	0.207207	0.207767	0.172291	0.29624	0.437441
4,26	3.89273	3.67587	3.56424	7.40676	7.36017	6.87102	1.83682	0.874928	1.22911	1.89472	1.03958	1.53266	0.020888	0.205369	0.206661	0.171645	0.297092	0.432296
4,26333333	3.89683	3.68099	3.56997	7.40728	7.36631	6.86566	1.83776	0.8731	1.22822	1.89233	1.0408	1.53536	0.018711	0.204921	0.206827	0.170966	0.294967	0.432908
4,26666667	3.89991	3.68197	3.5673	7.40938	7.36047	6.87029	1.83716	0.874046	1.22822	1.89519	1.0332	1.5399	0.017603	0.206056	0.207401	0.169035	0.295101	0.437706
4,27	3.90466	3.68524	3.57345	7.40977	7.36676	6.87218	1.83844	0.874243	1.22839	1.89375	1.03986	1.53617	0.017015	0.205574	0.208922	0.167144	0.2982	0.4297
4,27333333	3.90928	3.68229	3.5761	7.41151	7.36939	6.87095	1.83866	0.876758	1.22682	1.89442	1.03784	1.53612	0.018576	0.20547	0.208709	0.168849	0.29979	0.431071
4,27666667	3.91416	3.6882	3.58059	7.41007	7.36708	6.8701	1.8403	0.872357	1.22629	1.89283	1.03719	1.53493	0.02145	0.209329	0.208995	0.170621	0.297107	0.436536
4,28	3.91641	3.69084	3.581	7.41084	7.37073	6.87169	1.8391	0.879116	1.22553	1.8924	1.0395	1.53636	0.02359	0.213282	0.207955	0.171275	0.295042	0.427579
4,28333333	3.91773	3.69037	3.58466	7.41183	7.3694	6.87438	1.83885	0.873073	1.22934	1.89093	1.0415	1.53453	0.024952	0.213189	0.206901	0.171432	0.29658	0.435228
4,28666667	3.92007	3.69683	3.59238	7.41286	7.37224	6.87081	1.83732	0.873383	1.22728	1.89154	1.03944	1.53594	0.024334	0.213463	0.206391	0.170594	0.298968	0.435781
4,29	3.92199	3.69692	3.59131	7.41247	7.37245	6.87777	1.83721	0.873678	1.22575	1.89172	1.03707	1.53269	0.022075	0.211964	0.208346	0.169138	0.296978	0.429484
4,29333333	3.9244	3.70054	3.59651	7.41533	7.37191	6.87497	1.83513	0.871733	1.22549	1.89195	1.03785	1.53272	0.017581	0.212173	0.209504	0.169335	0.295821	0.433533
4,29666667	3.92707	3.70274	3.59795	7.41633	7.37507	6.87392	1.83762	0.875576	1.22808	1.894	1.0371	1.53611	0.01507	0.210231	0.208978	0.169956	0.295632	0.433561
4,3	3.93275	3.7014	3.60356	7.41598	7.37264	6.87958	1.83918	0.876389	1.22718	1.89412	1.04094	1.53666	0.01351	0.20993	0.210644	0.169132	0.298333	0.428311
4,30333333	3.93634	3.70999	3.59954	7.41747	7.379	6.88212	1.84048	0.872903	1.22145	1.89327	1.04166	1.53886	0.013861	0.208958	0.208886	0.172122	0.296826	0.43576
4,30666667	3.93906	3.70783	3.60424	7.41975	7.37366	6.88396	1.84092	0.874127	1.22749	1.89293	1.03969	1.53762	0.015027	0.211723	0.208063	0.173436	0.295718	0.431018
4,31	3.94279	3.70944	3.60733	7.41933	7.3754	6.886	1.84332	0.874479	1.22921	1.8923	1.03903	1.53332	0.016566	0.210026	0.207304	0.172881	0.295312	0.42713
4,31333333	3.94815	3.71544	3.61438	7.42103	7.37606	6.87992	1.84317	0.869631	1.22863	1.89398	1.03247	1.53459	0.0204	0.209904	0.208353	0.173069	0.300606	0.434396
4,31666667	3.95065	3.71586	3.60982	7.42202	7.37794	6.88527	1.84283	0.873381	1.22671	1.89166	1.03876	1.53839	0.025182	0.208897	0.206831	0.17251	0.300817	0.425625
4,32	3.95391	3.7169	3.61834	7.4223	7.37594	6.88508	1.84267	0.873096	1.22967	1.89219	1.0368	1.53903	0.026431	0.207688	0.208456	0.171859	0.2976	0.42375
4,32333333	3.95734	3.72126	3.6182	7.42369	7.38281	6.88903	1.84197	0.875108	1.22805	1.89322	1.03594	1.53505	0.026248	0.209223	0.208934	0.170497	0.297884	0.433441
4,32666667	3.96008	3.72065	3.62191	7.4241	7.38508	6.88315	1.84144	0.871949	1.22869	1.89323	1.04123	1.53665	0.02701	0.212402	0.208487	0.170413	0.301265	0.427463
4,33	3.95955	3.72258	3.62128	7.42478	7.38869	6.88567	1.84147	0.873513	1.22584	1.89012	1.03723	1.53412	0.026221	0.212549	0.208086	0.167657	0.301882	0.424964
4,33333333	3.96405	3.73146	3.62652	7.42493	7.38467	6.8927	1.84275	0.875708	1.22426	1.8913	1.04143	1.53327	0.022444	0.211685	0.208985	0.169009	0.299172	0.434868
4,33666667	3.96479	3.7305	3.63429	7.42689	7.38231	6.88966	1.84322	0.87423	1.22728	1.88997	1.03812	1.53866	0.020323	0.213754	0.208194	0.168281	0.299499	0.427572
4,34	3.96996	3.73126	3.63111	7.4272	7.38371	6.88797	1.84347	0.876621	1.22778	1.89005	1.03612	1.53474	0.019385	0.211898	0.206442	0.168964	0.300858	0.42643
4,34333333	3.9731	3.73507	3.62942	7.42826	7.38445	6.88743	1.84321	0.873034	1.23025	1.89089	1.03552	1.5369	0.020113	0.210151	0.207068	0.170446	0.301543	0.435809
4,34666667	3.97717	3.73919	3.64247	7.42823	7.39191	6.89218	1.84157	0.874284	1.22532	1.8908	1.0382	1.53892	0.021115	0.208661	0.207497	0.171551	0.29794	0.427229
4,35	3.97914	3.74372	3.63774	7.43063	7.38671	6.89222	1.84074	0.872513	1.23005	1.89009	1.04095	1.53727	0.021677	0.209598	0.207352	0.1721	0.296192	0.427755
4,35333333	3.98435	3.74089	3.63774	7.42997	7.38923	6.89228	1.84102	0.873884	1.2315	1.89296	1.04009	1.53661	0.025331	0.20923	0.207188	0.171623	0.297194	0.435082
4,35666667	3.98498	3.74219	3.64908	7.43146	7.38935	6.89816	1.84216	0.873429	1.22543	1.89344	1.04046	1.53594	0.02819	0.207766	0.20891	0.171847	0.300345	0.426616
4,36	3.98803	3.74696	3.64654	7.43346	7.39306	6.89708	1.84329	0.875817	1.22497	1.89213	1.03645	1.53853	0.029146	0.209035	0.206685	0.170152	0.298308	0.4259
4,36333333	3.99114	3.74883	3.65021	7.43538	7.38848	6.89478	1.84472	0.873088	1.23041	1.89067	1.04015	1.53523	0.030359	0.209456	0.207139	0.170371	0.296799	0.435168
4,36666667	3.99409	3.75118	3.65345	7.43498	7.39695	6.89619	1.84583	0.868988	1.22722	1.89279	1.03827	1.53596	0.029557	0.208538	0.206819	0.169203	0.298541	0.427616
4,37	3.9969	3.7545	3.65227	7.43788	7.39676	6.89646	1.84683	0.874346	1.22438	1.89167	1.04083	1.53274	0.025777	0.209229	0.207677	0.170047	0.301625	0.429271
4,37333333	3.99999	3.75336	3.65928	7.43835	7.39924	6.89897	1.84776	0.875103	1.22504	1.89221	1.03462	1.5367	0.024214	0.210691	0.207051	0.170004	0.298332	0.434852
4,37666667	4.00211	3.75919	3.65852	7.43983	7.39246	6.90153	1.84822	0.870669	1.22946	1.89382	1.04119	1.53267	0.021005	0.209355	0.208517	0.169324	0.296914	0.426656
4,38	4.00528	3.75996	3.66466	7.44055	7.39439	6.90012	1.84728	0.873475	1.22311	1.89734	1.03591	1.53438	0.020147	0.211266	0.207817	0.170444	0.297666	0.430337
4,38333333	4.00665	3.76105	3.66437	7.44273	7.39909	6.89879	1.84689	0.875469	1.226	1.89496	1.04194	1.53522	0.02185	0.214792	0.207934	0.169721	0.299947	0.432698
4,38666667	4.00759	3.76659	3.66695	7.44238	7.39241	6.90985	1.846	0.877888	1.22445	1.89617	1.03965	1.5319	0.024289	0.215297	0.207435	0.169845	0.298467	0.425819
4,39	4.00992	3.76394	3.66977	7.44328	7.39699	6.90537	1.84443	0.876338	1.22467	1.89635	1.03972	1.53495	0.023664	0.215016	0.208545	0.169573	0.29598	0.432588
4,39333333	4.01195	3.77195	3.67413	7.44467	7.39597	6.90491	1.84327	0.87727	1.23156	1.89564	1.04094	1.53655	0.025914	0.215588	0.207702	0.170355	0.296292	0.434794
4,39666667	4.01254	3.77436	3.67675	7.44688	7.40366	6.90851	1.84327	0.875233	1.22704	1.89432	1.0369	1.53627	0.022107	0.21432	0.207069	0.170091	0.299904	0.426709
4,4	4.01582	3.77457	3.6826	7.44539	7.39917	6.90596	1.84181	0.874025	1.22858	1.89444	1.04122	1.53631	0.020801	0.210687	0.20714	0.170582	0.30012	0.434136
4,40333333	4.01941	3.77691	3.68052	7.44538	7.40195	6.90804	1.84035	0.870687	1.2287	1.89256	1.0416	1.53597	0.019679	0.209533	0.208259	0.170875	0.29614	0.43264
4,40666667	4.02295	3.777	3.68507	7.44721	7.40433	6.90917	1.84044	0.877316	1.22552	1.89169	1.03977	1.53236	0.020694	0.212419	0.208731	0.171919	0.296194	0.424941
4,41	4.02592	3.77904	3.68712	7.44724	7.40082	6.90867	1.84148	0.878848	1.22046	1.8925	1.03933	1.53752	0.018283	0.213443	0.210666	0.172591	0.298377	0.432782
4,41333333	4.03061	3.78044	3.68986	7.44592	7.40226	6.90997	1.84182	0.874389	1.22514	1.89345	1.03819	1.5293	0.021723	0.214656	0.212526	0.172629	0.297886	0.43074
4,41666667	4.03555	3.78421	3.69047	7.44889	7.40291	6.90918	1.84149	0.872983	1.22982	1.89476	1.04003	1.53288	0.023955	0.215914	0.21147	0.172343	0.294216	0.425664
4,42	4.03744	3.78191	3.69226	7.45124	7.40667	6.90941	1.84179	0.875584	1.22576	1.89716	1.04327	1.53112	0.024065	0.215108	0.211301	0.170716	0.295019	0.433869
4,42333333	4.03754	3.78948	3.69762	7.4511	7.40425	6.91152	1.84143	0.877915	1.22542	1.89977	1.04029	1.53539	0.024819	0.212093	0.211967	0.170172	0.297897	0.428826
4,42666667	4.04104	3.79501	3.70446	7.45196	7.41207	6.91749	1.84068	0.871187	1.22654	1.90056	1.03987	1.53346	0.02744	0.210989	0.211861	0.169037	0.297474	0.422178
4,43	4.04302	3.7914	3.6985	7.45476	7.40649	6.91885	1.84128	0.872008	1.22565	1.89847	1.04103	1.5366	0.025561	0.209547	0.210706	0.168106	0.294567	0.430557
4,43333333	4.04738	3.79523	3.70806	7.45466	7.40821	6.91779	1.84174	0.87912	1.22437	1.89981	1.04388	1.53259	0.024852	0.208767	0.211105	0.169356	0.295071	0.423047
4,43666667	4.05101	3.80037	3.70586	7.45609	7.41851	6.91462	1.84254	0.879191	1.22263	1.8993	1.03976	1.53434	0.026942	0.211552	0.209808	0.171169	0.298834	0.420269
4,44	4.05686	3.79591	3.70688	7.45602	7.41429	6.91866	1.8426	0.878203	1.22492	1.89658	1.04276	1.53902	0.026746	0.213535	0.208102	0.170369	0.299927	0.429948
4,44333333	4.05849	3.80223	3.71207	7.45709	7.41401	6.92081	1.84289	0.877643	1.22518	1.8967	1.03811	1.52962	0.027901	0.214712	0.208698	0.169538	0.297057	0.425429
4,44666667	4.06132	3.80647	3.71629	7.45795	7.41449	6.92223	1.84217	0.878897	1.22614	1.89851	1.03805	1.53396	0.029087	0.215466	0.208347	0.169997	0.2952	0.422484
4,45	4.06253	3.80409	3.71742	7.45913	7.41625	6.92359	1.84152	0.875973	1.22532	1.89406	1.03859	1.53632	0.028974	0.215352	0.20894	0.170624	0.297897	0.43218
4,45333333	4.06694	3.80984	3.72295	7.45902	7.41905	6.92283	1.84141	0.87448	1.22225	1.89295	1.04389	1.53407	0.028833	0.214748	0.2107	0.169548	0.298052	0.426119
4,45666667	4.07005	3.81288	3.72254	7.46014	7.41868	6.91993	1.84098	0.873348	1.22631	1.89392	1.03961	1.53668	0.028262	0.213033	0.207991	0.169961	0.295776	0.422906
4,46	4.07469	3.81542	3.72408	7.46086	7.4192	6.92594	1.8394	0.87172	1.2295	1.89319	1.04021	1.53006	0.028967	0.211704	0.207634	0.17306	0.29565	0.432584
4,46333333	4.07805	3.81204	3.72896	7.46128	7.42264	6.92336	1.83991	0.878294	1.22639	1.89365	1.03946	1.53806	0.028454	0.212452	0.207143	0.173277	0.299927	0.425619
4,46666667	4.08008	3.81654	3.72774	7.46199	7.42248	6.92883	1.8434	0.874879	1.22373	1.89832	1.03879	1.5359	0.028506	0.212945	0.208293	0.170728	0.299593	0.422772
4,47	4.08029	3.81693	3.73277	7.46308	7.41974	6.92866	1.84445	0.874265	1.23068	1.89768	1.04389	1.53218	0.029525	0.212712	0.208376	0.170522	0.295612	0.431663
4,47333333	4.08237	3.82328	3.73629	7.46584	7.42235	6.93045	1.84388	0.875787	1.22403	1.89734	1.03913	1.53754	0.031106	0.214612	0.211617	0.17089	0.295429	0.424881
4,47666667	4.08415	3.82416	3.73594	7.46732	7.42936	6.92857	1.84473	0.875272	1.22705	1.89797	1.0402	1.53628	0.030106	0.214816	0.211782	0.168048	0.299019	0.42028
4,48	4.0876	3.8274	3.73743	7.46765	7.41921	6.92499	1.84543	0.873231	1.22413	1.8964	1.03644	1.53378	0.029961	0.215832	0.212961	0.167304	0.298904	0.430653
4,48333333	4.09073	3.82504	3.7381	7.46928	7.42476	6.93144	1.84308	0.874886	1.22593	1.89207	1.0426	1.53394	0.032046	0.21638	0.212383	0.168108	0.296845	0.425076
4,48666667	4.09303	3.82906	3.74254	7.46975	7.42201	6.93423	1.84164	0.87503	1.23163	1.89267	1.04272	1.53652	0.029824	0.217893	0.212289	0.168477	0.297917	0.421703
4,49	4.09775	3.83484	3.74629	7.46975	7.42156	6.93424	1.84209	0.879014	1.22594	1.89102	1.0397	1.52893	0.028392	0.217575	0.211882	0.167952	0.299999	0.43153
4,49333333	4.09957	3.837	3.75293	7.46917	7.43152	6.93007	1.84253	0.877051	1.22742	1.88893	1.03727	1.52867	0.027251	0.216741	0.209193	0.168515	0.301109	0.42798
4,49666667	4.10044	3.83466	3.75349	7.47026	7.43121	6.93593	1.842	0.87564	1.23158	1.89002	1.04301	1.53384	0.027437	0.215606	0.209742	0.168965	0.298189	0.421235
4,5	4.10298	3.84163	3.753	7.46971	7.42619	6.93673	1.84308	0.873001	1.22514	1.89542	1.04016	1.53375	0.023918	0.216362	0.208519	0.170392	0.29786	0.43043
4,50333333	4.10667	3.84367	3.75739	7.47217	7.42941	6.9353	1.84394	0.878629	1.2266	1.89701	1.04142	1.52789	0.023036	0.214556	0.206195	0.17199	0.300634	0.425821
4,50666667	4.10623	3.84023	3.75968	7.47268	7.43117	6.93015	1.84617	0.878786	1.22826	1.89792	1.03835	1.52614	0.023751	0.215767	0.208608	0.172239	0.300793	0.42025
4,51	4.10832	3.84428	3.7617	7.47346	7.43198	6.94221	1.8458	0.875384	1.22808	1.89791	1.04558	1.53069	0.023653	0.214589	0.209807	0.172078	0.29647	0.428927
4,51333333	4.11161	3.84782	3.76341	7.47372	7.43027	6.94142	1.84535	0.878851	1.22527	1.89686	1.04076	1.52628	0.024611	0.212912	0.20868	0.171199	0.296035	0.430542
4,51666667	4.11511	3.85242	3.76812	7.47569	7.43005	6.94172	1.84564	0.877687	1.22565	1.89199	1.04307	1.53072	0.029474	0.214048	0.209655	0.170642	0.298869	0.422638
4,52	4.11751	3.85171	3.76681	7.4753	7.43442	6.93472	1.84663	0.876897	1.22777	1.89164	1.03781	1.53209	0.03093	0.215252	0.211482	0.169138	0.298737	0.432285
4,52333333	4.12136	3.85313	3.7723	7.47708	7.43137	6.94171	1.846	0.875567	1.22461	1.89166	1.03699	1.53562	0.031405	0.212461	0.209988	0.166742	0.294431	0.433107
4,52666667	4.12399	3.85534	3.77326	7.47766	7.43187	6.94367	1.84728	0.876135	1.22519	1.89219	1.04463	1.53242	0.0327	0.215241	0.209028	0.166114	0.295058	0.423159
4,53	4.12738	3.85748	3.77554	7.47854	7.42987	6.94278	1.8493	0.87349	1.23097	1.8922	1.03984	1.53686	0.033492	0.215895	0.209168	0.167263	0.300168	0.427106
4,53333333	4.13007	3.85761	3.77766	7.48017	7.43731	6.94451	1.84869	0.874774	1.22799	1.89539	1.04426	1.53435	0.028981	0.214493	0.208474	0.166668	0.298049	0.430486
4,53666667	4.13346	3.86643	3.78303	7.48145	7.43587	6.94445	1.84744	0.876543	1.21754	1.89441	1.04638	1.53399	0.029275	0.214812	0.208341	0.16628	0.294548	0.419537
4,54	4.13607	3.86658	3.78363	7.4813	7.4409	6.94766	1.8484	0.877069	1.22905	1.89691	1.042	1.53482	0.028369	0.216406	0.207228	0.168981	0.295136	0.422251
4,54333333	4.13892	3.86788	3.78556	7.48318	7.44365	6.94589	1.84861	0.875686	1.2252	1.89816	1.04296	1.53736	0.029013	0.217248	0.208625	0.169661	0.298573	0.429366
4,54666667	4.14079	3.86903	3.79331	7.48461	7.44048	6.95218	1.84886	0.877016	1.22415	1.89811	1.0388	1.53344	0.029404	0.218859	0.208989	0.168696	0.293911	0.420713
4,55	4.14458	3.86859	3.79079	7.48305	7.44302	6.94894	1.84938	0.871859	1.22641	1.89746	1.03807	1.53526	0.032159	0.221246	0.209937	0.166741	0.293388	0.421221
4,55333333	4.14771	3.87147	3.79117	7.48274	7.44366	6.94795	1.8507	0.872687	1.22496	1.89877	1.03934	1.52739	0.032454	0.221519	0.210458	0.167615	0.294673	0.429829
4,55666667	4.14931	3.87176	3.79144	7.4847	7.43985	6.94972	1.84935	0.876086	1.22563	1.89954	1.04397	1.53137	0.033336	0.219976	0.210102	0.166565	0.300142	0.422244
4,56	4.15307	3.8762	3.80046	7.48494	7.44808	6.95236	1.84939	0.872754	1.22846	1.89795	1.04022	1.53071	0.034839	0.220589	0.210818	0.166723	0.297564	0.417965
4,56333333	4.15726	3.87748	3.80411	7.4863	7.44301	6.95022	1.84908	0.876519	1.22812	1.89911	1.04154	1.53296	0.034034	0.22027	0.211489	0.168233	0.297198	0.427885
4,56666667	4.16001	3.88463	3.80122	7.4873	7.44508	6.957	1.84962	0.876277	1.22563	1.90026	1.04114	1.53266	0.031948	0.220071	0.210937	0.170964	0.298234	0.422889
4,57	4.16052	3.88174	3.80819	7.4893	7.44714	6.95766	1.85033	0.874867	1.23024	1.90025	1.04233	1.52923	0.034387	0.220601	0.209416	0.169192	0.300974	0.417933
4,57333333	4.1653	3.88087	3.80666	7.48799	7.44599	6.95527	1.85121	0.873895	1.22513	1.89847	1.03603	1.53295	0.036095	0.221222	0.211327	0.169612	0.296635	0.428683
4,57666667	4.16834	3.88641	3.80512	7.48969	7.4459	6.95952	1.85164	0.880962	1.2249	1.90091	1.04098	1.52987	0.035608	0.219918	0.211201	0.17115	0.295365	0.427236
4,58	4.16967	3.8866	3.8115	7.49079	7.44635	6.95592	1.85256	0.875505	1.22618	1.90076	1.03834	1.53283	0.036225	0.218976	0.210202	0.169251	0.296712	0.41926
4,58333333	4.1707	3.88987	3.81136	7.49223	7.44958	6.9603	1.85361	0.878427	1.22408	1.90062	1.04311	1.5364	0.036842	0.215835	0.211202	0.167007	0.298054	0.428829
4,58666667	4.17383	3.89692	3.81753	7.4924	7.44891	6.95655	1.8516	0.877325	1.22691	1.90073	1.04312	1.53394	0.034356	0.213857	0.212163	0.168725	0.294427	0.426447
4,59	4.1749	3.89658	3.82113	7.49531	7.45006	6.95991	1.85287	0.876308	1.22368	1.90004	1.04118	1.533	0.034772	0.213332	0.213658	0.169245	0.293827	0.416547
4,59333333	4.1771	3.90057	3.82529	7.49577	7.45402	6.96001	1.85268	0.876095	1.23087	1.90032	1.04445	1.5336	0.034244	0.215502	0.213434	0.168152	0.297331	0.425249
4,59666667	4.17964	3.8985	3.82259	7.49698	7.4542	6.96378	1.85154	0.875115	1.22675	1.90228	1.04067	1.53309	0.032865	0.215143	0.214065	0.169149	0.298878	0.423496
4,6	4.18212	3.90274	3.82684	7.4988	7.45364	6.9597	1.84877	0.875761	1.22654	1.90157	1.0451	1.53155	0.034119	0.214537	0.212563	0.170509	0.295898	0.412555
4,60333333	4.18508	3.90446	3.82978	7.5009	7.45186	6.9612	1.85053	0.875574	1.22725	1.89996	1.04231	1.53086	0.031145	0.214178	0.213397	0.16973	0.296102	0.420235
4,60666667	4.18785	3.90728	3.83322	7.50089	7.45329	6.96333	1.84963	0.876082	1.22008	1.90338	1.04838	1.53053	0.030108	0.214791	0.209636	0.16908	0.299634	0.422743
4,61	4.18996	3.90586	3.83025	7.50094	7.45164	6.96949	1.84746	0.874142	1.22669	1.90226	1.03788	1.53527	0.029926	0.209651	0.211752	0.169032	0.296739	0.411147
4,61333333	4.19251	3.90962	3.83438	7.50185	7.45632	6.96719	1.84782	0.878291	1.22411	1.89966	1.04134	1.53141	0.032296	0.209818	0.213147	0.169771	0.29247	0.41921
4,61666667	4.1953	3.91058	3.83764	7.50212	7.45694	6.96658	1.84867	0.877021	1.22389	1.8992	1.03784	1.53607	0.035296	0.212335	0.215782	0.168892	0.292987	0.424266
4,62	4.19928	3.91256	3.83766	7.50229	7.45668	6.96539	1.84743	0.877116	1.22691	1.9008	1.04246	1.53034	0.039909	0.211999	0.215227	0.169732	0.29771	0.415016
4,62333333	4.20077	3.91548	3.84275	7.50347	7.46191	6.96437	1.84677	0.879219	1.22334	1.89712	1.04366	1.53138	0.037911	0.214021	0.217768	0.16903	0.295709	0.419668
4,62666667	4.20282	3.91695	3.8421	7.50542	7.45928	6.97253	1.84907	0.874864	1.22801	1.89532	1.04289	1.53344	0.039032	0.218521	0.215005	0.167819	0.293751	0.429296
4,63	4.20415	3.91401	3.84947	7.50625	7.4645	6.96397	1.84816	0.874879	1.22666	1.89846	1.04844	1.53265	0.038421	0.219885	0.213961	0.167694	0.296305	0.421287
4,63333333	4.20665	3.91792	3.85126	7.50726	7.46186	6.97288	1.84812	0.874698	1.22641	1.90192	1.04193	1.53256	0.034798	0.220659	0.213261	0.169707	0.300142	0.42202
4,63666667	4.20792	3.92153	3.85443	7.50762	7.46196	6.97045	1.84839	0.877254	1.23108	1.90118	1.04291	1.53207	0.033687	0.223187	0.213335	0.1701	0.295893	0.431389
4,64	4.21068	3.92382	3.85581	7.50883	7.46229	6.96557	1.84906	0.877069	1.22571	1.90051	1.04253	1.53615	0.035239	0.222715	0.210964	0.170462	0.294005	0.422315
4,64333333	4.21318	3.92418	3.85894	7.50797	7.46346	6.97102	1.84858	0.875075	1.22263	1.90363	1.03892	1.53489	0.034255	0.222122	0.212124	0.172316	0.297901	0.41648
4,64666667	4.21706	3.92447	3.86097	7.50685	7.46582	6.97043	1.84946	0.874699	1.22552	1.90059	1.04182	1.53856	0.0335	0.222247	0.211417	0.170933	0.301505	0.425525
4,65	4.22174	3.93459	3.86166	7.50728	7.46157	6.97498	1.85119	0.874875	1.22047	1.89874	1.04204	1.53322	0.035634	0.222892	0.209846	0.169696	0.297851	0.417963
4,65333333	4.2239	3.938	3.86138	7.50857	7.46793	6.9733	1.85246	0.877051	1.22823	1.89879	1.0415	1.5349	0.036095	0.222574	0.209648	0.167952	0.296623	0.412583
4,65666667	4.22454	3.93324	3.86981	7.50801	7.4661	6.97895	1.85258	0.879294	1.22255	1.9011	1.03823	1.53209	0.03787	0.224229	0.212612	0.166708	0.300602	0.421856
4,66	4.2272	3.93388	3.87037	7.50981	7.47022	6.97833	1.85432	0.876661	1.22717	1.90236	1.04398	1.5352	0.037007	0.224936	0.211553	0.165879	0.30038	0.422652
4,66333333	4.23086	3.93919	3.86957	7.51341	7.46669	6.97767	1.85525	0.8768	1.22463	1.90268	1.04319	1.53306	0.034715	0.224473	0.212452	0.165949	0.294805	0.413842
4,66666667	4.23259	3.94084	3.87113	7.51471	7.46448	6.98077	1.85428	0.876241	1.22712	1.90126	1.04174	1.53414	0.033676	0.221971	0.213488	0.164426	0.295359	0.42366
4,67	4.23511	3.93823	3.87806	7.51579	7.46939	6.98114	1.85236	0.876004	1.22359	1.89956	1.04328	1.53484	0.03555	0.220474	0.214632	0.165312	0.299762	0.423737
4,67333333	4.23977	3.94604	3.87667	7.51808	7.46596	6.9789	1.85292	0.875439	1.22089	1.89887	1.04168	1.53234	0.034194	0.217273	0.215246	0.167458	0.29737	0.414865
4,67666667	4.24383	3.94809	3.88143	7.51916	7.47109	6.98224	1.85235	0.87633	1.22005	1.89642	1.04199	1.53342	0.036057	0.2179	0.21666	0.168668	0.294839	0.41976
4,68	4.24584	3.9483	3.88079	7.51766	7.47485	6.98083	1.85208	0.877725	1.22545	1.89857	1.04117	1.5313	0.040061	0.217738	0.216287	0.169402	0.296028	0.42551
4,68333333	4.24748	3.94846	3.88311	7.51703	7.47821	6.98673	1.85268	0.878372	1.223	1.90005	1.04486	1.53188	0.038234	0.217256	0.216184	0.170504	0.298894	0.417157
4,68666667	4.25157	3.95464	3.88277	7.51699	7.47325	6.98594	1.8551	0.878423	1.22567	1.90085	1.04147	1.53236	0.035882	0.217831	0.213175	0.168757	0.295555	0.420643
4,69	4.25477	3.95376	3.88585	7.51714	7.47335	6.99047	1.85557	0.874769	1.22577	1.90139	1.04316	1.53435	0.036465	0.218101	0.210501	0.167009	0.293766	0.428974
4,69333333	4.25661	3.95222	3.89143	7.51853	7.47934	6.98855	1.85582	0.878769	1.22207	1.90295	1.04575	1.53226	0.035201	0.21639	0.208822	0.166102	0.295608	0.419318
4,69666667	4.25947	3.95485	3.8929	7.52063	7.47209	6.99533	1.85672	0.877135	1.22276	1.90143	1.04314	1.5289	0.03196	0.21731	0.209498	0.166395	0.298913	0.420859
4,7	4.26422	3.95749	3.89818	7.52169	7.47597	6.99151	1.85796	0.882546	1.22276	1.90114	1.04133	1.53429	0.033372	0.218281	0.208895	0.16796	0.294314	0.42762
4,70333333	4.26644	3.96351	3.89628	7.52262	7.48473	6.98828	1.85706	0.879906	1.22403	1.90317	1.04589	1.53432	0.036485	0.218338	0.209949	0.169376	0.293957	0.419043
4,70666667	4.26945	3.96206	3.89801	7.52238	7.4787	6.98873	1.85616	0.876098	1.22526	1.90247	1.04476	1.53299	0.034979	0.219665	0.211658	0.170062	0.296979	0.41926
4,71	4.27238	3.96692	3.89912	7.52131	7.4788	6.99008	1.85559	0.878929	1.22319	1.90056	1.04475	1.53237	0.03317	0.220651	0.21271	0.168716	0.298554	0.429487
4,71333333	4.27443	3.96505	3.90229	7.52203	7.47863	6.98982	1.85585	0.879756	1.22429	1.90098	1.04546	1.53706	0.033946	0.220983	0.210979	0.167797	0.294976	0.421943
4,71666667	4.27545	3.96471	3.9112	7.52358	7.48275	6.993	1.85548	0.880084	1.22222	1.90219	1.04674	1.53524	0.033712	0.221933	0.211098	0.166534	0.295167	0.42118
4,72	4.27621	3.96848	3.90865	7.52592	7.48119	6.99772	1.85674	0.871863	1.22759	1.90132	1.04166	1.53362	0.030446	0.223113	0.211552	0.166392	0.298449	0.429445
4,72333333	4.27879	3.97444	3.90523	7.52915	7.4823	6.9917	1.85867	0.874953	1.22256	1.90073	1.04189	1.53014	0.032442	0.223557	0.208921	0.166303	0.298636	0.420643
4,72666667	4.28182	3.97294	3.91241	7.53115	7.48729	7.00013	1.85965	0.877393	1.22459	1.9019	1.04099	1.53411	0.035579	0.222267	0.210403	0.167352	0.29554	0.415878
4,73	4.28437	3.97949	3.91765	7.53283	7.48563	6.99499	1.8595	0.873315	1.22411	1.90329	1.03885	1.53519	0.035612	0.22172	0.212298	0.166544	0.296832	0.424394
4,73333333	4.2866	3.97678	3.91705	7.53491	7.48672	6.99646	1.85999	0.875697	1.226	1.90197	1.04329	1.53062	0.032667	0.221966	0.21135	0.166686	0.301463	0.419382
4,73666667	4.29089	3.98098	3.91796	7.53516	7.48846	6.9974	1.86052	0.876034	1.22389	1.90267	1.04641	1.53177	0.033677	0.22012	0.212498	0.165672	0.299237	0.415835
4,74	4.29392	3.9811	3.91949	7.53464	7.48147	7.00073	1.85983	0.878148	1.22446	1.90466	1.04354	1.535	0.031268	0.219311	0.214875	0.166878	0.297265	0.425605
4,74333333	4.29692	3.98413	3.9226	7.53605	7.48895	6.99599	1.86034	0.876521	1.22179	1.9066	1.04279	1.53337	0.029395	0.220568	0.213164	0.168395	0.298551	0.421371
4,74666667	4.29861	3.98131	3.92611	7.53659	7.48458	6.99824	1.86049	0.882108	1.22326	1.90397	1.04382	1.53165	0.032082	0.221411	0.212968	0.16976	0.301126	0.413775
4,75	4.30168	3.99047	3.9251	7.53591	7.49127	7.00365	1.86124	0.875697	1.2246	1.90139	1.04438	1.52816	0.03623	0.221525	0.214481	0.171983	0.29723	0.420647
4,75333333	4.30309	3.98669	3.92914	7.53529	7.49437	7.00021	1.86004	0.871696	1.22392	1.9023	1.04246	1.5312	0.038518	0.22337	0.214026	0.173241	0.29575	0.416624
4,75666667	4.30254	3.99241	3.92854	7.53638	7.48651	7.00112	1.85917	0.877506	1.22577	1.90228	1.04129	1.52777	0.038977	0.22082	0.212294	0.170357	0.297324	0.408671
4,76	4.30374	3.99341	3.93127	7.53683	7.49914	7.00368	1.85794	0.874931	1.22743	1.89865	1.0426	1.52684	0.040195	0.220426	0.212624	0.170627	0.29902	0.417908
4,76333333	4.30586	3.99388	3.93065	7.53609	7.49366	7.00499	1.85769	0.872999	1.22519	1.90065	1.04729	1.53076	0.039809	0.221017	0.212522	0.171198	0.295099	0.417899
4,76666667	4.30836	3.99401	3.93832	7.53743	7.49518	7.00031	1.85551	0.872707	1.2277	1.90372	1.04636	1.53189	0.042079	0.219886	0.213278	0.168385	0.294314	0.410658
4,77	4.30914	3.99713	3.93778	7.54063	7.49118	7.0063	1.85641	0.875313	1.22554	1.90235	1.0414	1.5268	0.039616	0.218685	0.215048	0.169121	0.297876	0.420801
4,77333333	4.31215	4.00508	3.93888	7.54261	7.49769	7.01385	1.85605	0.878966	1.2217	1.90195	1.04248	1.53387	0.037937	0.220749	0.216641	0.171134	0.297751	0.423351
4,77666667	4.31392	4.00474	3.93897	7.54395	7.49951	7.00944	1.85523	0.879791	1.22423	1.90637	1.04124	1.53094	0.035819	0.222026	0.21631	0.168795	0.293993	0.413792
4,78	4.31556	4.00221	3.94414	7.54581	7.49553	7.01241	1.85453	0.879698	1.22422	1.90672	1.04363	1.52922	0.036865	0.221582	0.2171	0.166936	0.294167	0.421097
4,78333333	4.3175	4.00662	3.95065	7.54662	7.49673	7.01176	1.85545	0.877552	1.22499	1.90853	1.04681	1.53642	0.034138	0.221959	0.216029	0.166222	0.298026	0.425154
4,78666667	4.32	4.00839	3.94778	7.54662	7.49977	7.01042	1.85453	0.876119	1.22258	1.90975	1.04548	1.53095	0.032937	0.223014	0.214491	0.166463	0.29574	0.414821
4,79	4.32312	4.00946	3.95138	7.54666	7.50168	7.01255	1.85625	0.877998	1.22332	1.90791	1.04629	1.53189	0.035303	0.224006	0.21402	0.167263	0.293807	0.420142
4,79333333	4.32432	4.01073	3.95252	7.54685	7.49962	7.00938	1.85884	0.877497	1.22296	1.90471	1.0475	1.5332	0.037427	0.222008	0.214406	0.167861	0.296182	0.42385
4,79666667	4.32824	4.01165	3.95745	7.5478	7.50231	7.01079	1.85928	0.875894	1.22031	1.90304	1.0467	1.53394	0.035485	0.221069	0.214346	0.169212	0.299578	0.414655
4,8	4.33012	4.01285	3.95938	7.54833	7.50001	7.01255	1.85981	0.874384	1.22582	1.9022	1.04671	1.53104	0.03433	0.221472	0.214995	0.171326	0.294446	0.417886
4,80333333	4.33194	4.02123	3.96101	7.54922	7.50392	7.01494	1.86134	0.876068	1.22519	1.90206	1.04154	1.53228	0.033731	0.220929	0.216042	0.170724	0.293685	0.419933
4,80666667	4.33396	4.01867	3.95773	7.54976	7.50433	7.01214	1.86086	0.875732	1.2214	1.90223	1.0453	1.53325	0.036795	0.222282	0.2157	0.171196	0.296334	0.409199
4,81	4.33727	4.02019	3.9621	7.551	7.50331	7.02124	1.86026	0.877161	1.2246	1.90418	1.04472	1.53433	0.03339	0.221417	0.215931	0.171818	0.296182	0.412624
4,81333333	4.33896	4.01876	3.96706	7.55204	7.51336	7.01385	1.86141	0.87202	1.22397	1.90409	1.04726	1.53385	0.034096	0.22264	0.216236	0.170552	0.293429	0.419161
4,81666667	4.34202	4.02825	3.96861	7.55318	7.50547	7.0195	1.86097	0.875317	1.22426	1.90184	1.0454	1.52725	0.039286	0.221882	0.217088	0.170987	0.295388	0.409299
4,82	4.34532	4.0272	3.96983	7.55378	7.51082	7.01953	1.86069	0.875848	1.22322	1.90115	1.04125	1.53348	0.039627	0.222064	0.217133	0.169629	0.299083	0.41575
4,82333333	4.34805	4.03004	3.96515	7.55529	7.50961	7.02222	1.86111	0.875021	1.22271	1.90399	1.04318	1.53567	0.037385	0.218935	0.218517	0.167646	0.297335	0.423923
4,82666667	4.35002	4.02535	3.97576	7.55453	7.50551	7.01525	1.86191	0.874384	1.22097	1.90313	1.04373	1.53031	0.040264	0.218709	0.217389	0.168189	0.295173	0.416028
4,83	4.35245	4.0311	3.9752	7.5557	7.50329	7.01878	1.86109	0.876248	1.22718	1.90494	1.0481	1.53308	0.041215	0.216295	0.216477	0.168556	0.297931	0.417962
4,83333333	4.355	4.02857	3.98348	7.55715	7.51049	7.02294	1.86281	0.877159	1.22817	1.90621	1.0424	1.53634	0.035844	0.217588	0.216091	0.166635	0.299689	0.42545
4,83666667	4.3582	4.03574	3.9796	7.55776	7.50913	7.02649	1.86224	0.876704	1.22497	1.9061	1.04737	1.52963	0.036766	0.2162	0.215984	0.1668	0.294496	0.415891
4,84	4.35968	4.03898	3.98522	7.55748	7.50968	7.02338	1.86173	0.874295	1.22646	1.90644	1.04486	1.52909	0.036431	0.217655	0.215847	0.166717	0.292944	0.417503
4,84333333	4.36328	4.03811	3.98551	7.55974	7.51245	7.02923	1.85953	0.875864	1.22135	1.90594	1.04104	1.52859	0.038196	0.216942	0.218021	0.166862	0.297368	0.426236
4,84666667	4.36527	4.04091	3.98207	7.55948	7.50812	7.03026	1.85909	0.879819	1.22618	1.90604	1.04114	1.52881	0.035127	0.219339	0.218552	0.168321	0.296282	0.417224
4,85	4.36711	4.03951	3.98889	7.56052	7.51785	7.02544	1.85702	0.877279	1.21956	1.90496	1.04695	1.53314	0.035863	0.218328	0.218075	0.169124	0.293331	0.418909
4,85333333	4.36827	4.04594	3.98908	7.56218	7.51115	7.02384	1.85755	0.880511	1.22205	1.90299	1.04834	1.52989	0.035787	0.220776	0.217619	0.16906	0.29583	0.426925
4,85666667	4.37177	4.04667	3.99106	7.56471	7.51748	7.02539	1.85794	0.873831	1.22395	1.90028	1.04446	1.53479	0.034727	0.221175	0.217667	0.169869	0.300388	0.417126
4,86	4.37254	4.04655	4.00115	7.56536	7.51859	7.03003	1.85915	0.879	1.22536	1.90014	1.04572	1.53157	0.033229	0.224312	0.216028	0.168478	0.297026	0.415058
4,86333333	4.37392	4.04834	3.9935	7.56673	7.5106	7.025	1.86126	0.879322	1.22462	1.89999	1.04347	1.53018	0.034167	0.221834	0.216573	0.167894	0.295809	0.423691
4,86666667	4.3758	4.04996	3.99892	7.56749	7.51934	7.02709	1.8622	0.875734	1.2241	1.90269	1.04722	1.5282	0.035587	0.22428	0.217581	0.166771	0.298781	0.414475
4,87	4.37962	4.05296	4.00337	7.56739	7.51965	7.03092	1.8622	0.877268	1.22233	1.90587	1.04459	1.52643	0.034889	0.222513	0.21797	0.166441	0.299612	0.41421
4,87333333	4.38083	4.05244	4.00352	7.56638	7.51847	7.03503	1.86404	0.877521	1.22374	1.90718	1.04399	1.5302	0.034332	0.223582	0.217377	0.16635	0.295141	0.423736
4,87666667	4.38245	4.05795	4.00829	7.56646	7.52242	7.0287	1.8652	0.874467	1.22187	1.90748	1.04187	1.52937	0.036176	0.220449	0.218957	0.166371	0.294739	0.416302
4,88	4.38533	4.05477	4.00663	7.56678	7.52079	7.03714	1.86537	0.880772	1.22125	1.9059	1.04096	1.5299	0.03597	0.221995	0.216859	0.164932	0.297867	0.413132
4,88333333	4.38904	4.05705	4.00819	7.5685	7.52007	7.039	1.86624	0.873198	1.21782	1.90559	1.04336	1.52905	0.036757	0.220015	0.215237	0.166301	0.296426	0.421672
4,88666667	4.39136	4.0591	4.00734	7.57007	7.52275	7.03432	1.86521	0.876421	1.22003	1.90405	1.0421	1.52661	0.038856	0.219865	0.213135	0.166816	0.293762	0.415343
4,89	4.39398	4.06412	4.01241	7.57118	7.5263	7.0421	1.86335	0.881695	1.22128	1.9035	1.04405	1.52548	0.03801	0.22016	0.2137	0.167301	0.295705	0.410815
4,89333333	4.39717	4.06404	4.01479	7.57281	7.52451	7.03717	1.86102	0.880452	1.22425	1.90379	1.04408	1.53224	0.038385	0.222521	0.211993	0.169783	0.299583	0.422247
4,89666667	4.39826	4.06707	4.01997	7.57496	7.52495	7.03666	1.86006	0.873187	1.22282	1.9036	1.04652	1.53503	0.038251	0.222701	0.211428	0.169682	0.295404	0.418678
4,9	4.3996	4.06708	4.01853	7.57363	7.52291	7.04422	1.85984	0.875955	1.22244	1.901	1.04206	1.53291	0.037941	0.223705	0.211749	0.170714	0.292964	0.414871
4,90333333	4.3996	4.06706	4.01979	7.5733	7.53471	7.04308	1.8609	0.87946	1.22185	1.90171	1.05005	1.53037	0.035287	0.224246	0.211905	0.170716	0.296312	0.423929
4,90666667	4.40158	4.07069	4.02053	7.57463	7.52737	7.03933	1.86132	0.878495	1.22508	1.9033	1.04517	1.52667	0.037081	0.223209	0.21217	0.170836	0.296449	0.422344
4,91	4.4022	4.06915	4.02338	7.57687	7.52761	7.03851	1.86428	0.880947	1.22063	1.9026	1.04777	1.53772	0.034464	0.222945	0.213219	0.168658	0.290852	0.414081
4,91333333	4.40372	4.07346	4.02719	7.57559	7.53045	7.04331	1.86521	0.88068	1.22046	1.90272	1.0438	1.53123	0.036536	0.222587	0.213849	0.171345	0.292927	0.422276
4,91666667	4.40792	4.07458	4.03188	7.57845	7.53418	7.04178	1.86528	0.877869	1.2186	1.90513	1.04691	1.53531	0.036191	0.221737	0.213234	0.169589	0.298126	0.419858
4,92	4.41041	4.07535	4.03296	7.58005	7.53738	7.04242	1.86688	0.874451	1.22255	1.90515	1.04482	1.53209	0.035246	0.221357	0.214747	0.16766	0.293995	0.412584
4,92333333	4.41148	4.07517	4.03104	7.58077	7.53472	7.04841	1.86879	0.876787	1.22036	1.90585	1.04453	1.53125	0.035645	0.220422	0.2151	0.167766	0.293057	0.420027
4,92666667	4.41539	4.08053	4.03386	7.57996	7.52686	7.0493	1.86841	0.875952	1.22487	1.90666	1.04467	1.52826	0.034771	0.221114	0.215563	0.168271	0.297901	0.419631
4,93	4.4174	4.08435	4.0343	7.58251	7.52765	7.05004	1.86861	0.875985	1.22133	1.90677	1.04454	1.52807	0.03198	0.223284	0.216708	0.166705	0.297129	0.410756
4,93333333	4.4182	4.08621	4.03995	7.582	7.53179	7.04663	1.86858	0.876817	1.22237	1.90667	1.04738	1.52858	0.032953	0.225179	0.215691	0.166426	0.292122	0.41911
4,93666667	4.42175	4.08393	4.03855	7.58162	7.53442	7.04668	1.86784	0.879111	1.22019	1.90844	1.0492	1.53019	0.034629	0.224722	0.217053	0.168894	0.296443	0.4166
4,94	4.42556	4.08571	4.03652	7.582	7.53148	7.04928	1.86709	0.885	1.21819	1.90765	1.04406	1.53052	0.031203	0.22506	0.216546	0.166471	0.29796	0.408296
4,94333333	4.42666	4.08888	4.04381	7.58294	7.53256	7.04503	1.86704	0.880243	1.21963	1.90859	1.04605	1.53283	0.033123	0.226568	0.214718	0.16574	0.294797	0.414945
4,94666667	4.43031	4.0887	4.04509	7.58296	7.53742	7.0497	1.86723	0.876667	1.21985	1.91128	1.04363	1.52886	0.03422	0.224936	0.216166	0.165474	0.294706	0.417075
4,95	4.43247	4.09602	4.0475	7.58428	7.53719	7.05264	1.86717	0.879664	1.2171	1.91031	1.04465	1.53223	0.033381	0.221158	0.219488	0.165056	0.299328	0.407347
4,95333333	4.43383	4.08993	4.04609	7.58616	7.53682	7.05525	1.86755	0.87603	1.21868	1.90869	1.04621	1.53337	0.033523	0.223542	0.218531	0.164511	0.296352	0.416806
4,95666667	4.43454	4.09621	4.05729	7.58717	7.53608	7.05786	1.86677	0.876381	1.22315	1.90717	1.04585	1.52944	0.036329	0.224741	0.219159	0.165559	0.294321	0.417726
4,96	4.43807	4.0979	4.05786	7.58846	7.53881	7.05595	1.86644	0.877352	1.21797	1.90548	1.0456	1.53202	0.036135	0.222091	0.221505	0.166148	0.296636	0.409356
4,96333333	4.44018	4.0987	4.05304	7.59003	7.54031	7.05691	1.86558	0.879076	1.22293	1.90412	1.045	1.52674	0.036888	0.220547	0.219825	0.167307	0.298519	0.415964
4,96666667	4.4433	4.09912	4.05976	7.59163	7.54378	7.05024	1.86782	0.877953	1.22395	1.90569	1.04966	1.52906	0.0355	0.221257	0.219177	0.167992	0.294167	0.417556
4,97	4.44616	4.10544	4.05821	7.593	7.5415	7.05221	1.86712	0.876315	1.21844	1.90628	1.04806	1.52972	0.035209	0.220729	0.219194	0.167941	0.29507	0.407823
4,97333333	4.4478	4.10305	4.05789	7.59418	7.54818	7.05379	1.86751	0.878434	1.22254	1.90794	1.04435	1.52806	0.035042	0.220056	0.218757	0.168408	0.300773	0.414898
4,97666667	4.44777	4.10351	4.05785	7.59414	7.53716	7.05979	1.86858	0.877155	1.2216	1.90818	1.04531	1.52822	0.03411	0.219738	0.218195	0.167411	0.298328	0.417531
4,98	4.44828	4.10925	4.06778	7.59343	7.54418	7.05757	1.86789	0.875242	1.22288	1.90738	1.04465	1.53202	0.033754	0.221173	0.218573	0.167323	0.295498	0.407577
4,98333333	4.45058	4.11301	4.06327	7.59306	7.54658	7.05727	1.86696	0.873493	1.21899	1.90394	1.04434	1.5285	0.036498	0.222788	0.21883	0.167059	0.299709	0.415908
4,98666667	4.45177	4.10532	4.07075	7.59282	7.54763	7.05818	1.86808	0.880694	1.22275	1.90466	1.04957	1.52662	0.037753	0.224638	0.218882	0.166968	0.300023	0.419725
4,99	4.45465	4.1179	4.07333	7.59315	7.54919	7.06361	1.86762	0.876041	1.22295	1.90452	1.0491	1.53528	0.038189	0.225712	0.21854	0.167196	0.294486	0.409904
4,99333333	4.45791	4.10867	4.0745	7.5942	7.54929	7.05921	1.86543	0.874503	1.22401	1.90666	1.04483	1.52879	0.042338	0.22718	0.218343	0.167947	0.295915	0.415705
4,99666667	4.46082	4.11396	4.0781	7.59572	7.55097	7.06059	1.86577	0.879827	1.22063	1.90591	1.0454	1.53202	0.042733	0.228504	0.218412	0.166092	0.29974	0.421051
5	4.46223	4.11939	4.07837	7.59699	7.54381	7.05815	1.86501	0.881527	1.22398	1.90998	1.04253	1.53438	0.041712	0.229623	0.216766	0.167157	0.295644	0.410652
5,00333333	4.4655	4.12048	4.08154	7.59825	7.54398	7.06695	1.86335	0.879916	1.22773	1.90993	1.04407	1.53265	0.044727	0.226642	0.216937	0.167674	0.294417	0.415883
5,00666667	4.46695	4.12128	4.08295	7.59961	7.55178	7.05709	1.86229	0.87517	1.22145	1.91019	1.04559	1.52981	0.046857	0.223573	0.217661	0.169423	0.296848	0.421601
5,01	4.46913	4.12416	4.0793	7.59921	7.55018	7.0589	1.86321	0.877644	1.21883	1.90925	1.0495	1.52835	0.044419	0.223244	0.216013	0.168341	0.296468	0.412996
5,01333333	4.47081	4.12467	4.08449	7.59982	7.55086	7.06756	1.86308	0.87612	1.2205	1.91133	1.04695	1.53279	0.043515	0.221583	0.215157	0.169328	0.291731	0.416223
5,01666667	4.47281	4.12627	4.0874	7.59918	7.55417	7.06927	1.86398	0.876486	1.22323	1.91044	1.04874	1.53069	0.043469	0.220148	0.215113	0.16963	0.293361	0.42018
5,02	4.47533	4.12582	4.08438	7.59994	7.55416	7.06398	1.86428	0.873869	1.22162	1.90953	1.04992	1.53257	0.042773	0.221548	0.214763	0.170023	0.297344	0.412124
5,02333333	4.47757	4.12289	4.08766	7.60035	7.55508	7.06478	1.86551	0.882008	1.2221	1.90684	1.04699	1.53283	0.042928	0.220834	0.214171	0.168042	0.294959	0.414557
5,02666667	4.4784	4.12831	4.09073	7.60164	7.55433	7.06896	1.86557	0.875647	1.22346	1.90644	1.04388	1.53331	0.042478	0.221442	0.215976	0.169178	0.29331	0.419063
5,03	4.48131	4.1325	4.09466	7.60366	7.55277	7.07183	1.86701	0.877262	1.22151	1.90559	1.04788	1.52825	0.045566	0.221038	0.215853	0.168029	0.297267	0.410589
5,03333333	4.48392	4.13205	4.09457	7.60685	7.55666	7.07488	1.86595	0.875328	1.22043	1.90428	1.0463	1.53238	0.043458	0.220251	0.215969	0.166609	0.2961	0.415672
5,03666667	4.48414	4.13765	4.09325	7.60709	7.55973	7.07446	1.86771	0.871602	1.21932	1.90253	1.04767	1.53103	0.039024	0.219429	0.215841	0.165594	0.291534	0.419639
5,04	4.48728	4.13439	4.09813	7.60679	7.56239	7.07491	1.86871	0.880339	1.22205	1.90619	1.04971	1.53144	0.037667	0.221824	0.21654	0.165795	0.29282	0.41176
5,04333333	4.4916	4.13658	4.10134	7.60838	7.55784	7.0748	1.87001	0.88195	1.21832	1.9066	1.04591	1.53243	0.040683	0.221699	0.215191	0.164859	0.296375	0.41584
5,04666667	4.49276	4.13633	4.09966	7.60764	7.55879	7.07475	1.87135	0.877958	1.21789	1.90613	1.04976	1.5255	0.040524	0.220964	0.216315	0.167109	0.293565	0.423141
5,05	4.49389	4.14143	4.10261	7.60716	7.55746	7.07415	1.87277	0.88083	1.21944	1.90897	1.04603	1.52871	0.043437	0.22278	0.217437	0.166623	0.293262	0.412727
5,05333333	4.49438	4.14296	4.10474	7.6077	7.5617	7.07339	1.87266	0.875161	1.22305	1.91141	1.04517	1.52872	0.046819	0.224917	0.216238	0.166435	0.297883	0.416517
5,05666667	4.49497	4.14373	4.10843	7.60939	7.56371	7.08124	1.87354	0.878716	1.21751	1.9107	1.04372	1.53138	0.048751	0.226431	0.21834	0.165484	0.298712	0.420542
5,06	4.49693	4.14804	4.11307	7.60906	7.56785	7.07397	1.87382	0.87845	1.21726	1.90967	1.04727	1.52815	0.044562	0.225567	0.21912	0.164645	0.295075	0.411348
5,06333333	4.49912	4.14996	4.11247	7.61028	7.55393	7.07319	1.87222	0.878752	1.22286	1.91087	1.04737	1.52972	0.042494	0.228717	0.220307	0.163942	0.296674	0.411152
5,06666667	4.50066	4.15031	4.11217	7.61125	7.56523	7.0834	1.8706	0.87614	1.21415	1.90934	1.04773	1.53408	0.04228	0.229467	0.220601	0.164823	0.299456	0.417591
5,07	4.50401	4.1552	4.11425	7.61342	7.56673	7.08072	1.87076	0.880868	1.22006	1.90902	1.0491	1.5315	0.043378	0.22647	0.222318	0.165853	0.29538	0.409011
5,07333333	4.50435	4.1484	4.11504	7.61344	7.56177	7.08095	1.87086	0.880696	1.22024	1.90911	1.04927	1.52489	0.043889	0.226932	0.220712	0.165006	0.293589	0.41215
5,07666667	4.50589	4.15094	4.1193	7.61514	7.57094	7.08355	1.87118	0.875872	1.21719	1.91018	1.04667	1.53303	0.045232	0.228799	0.220655	0.167727	0.298149	0.419232
5,08	4.50757	4.1528	4.12096	7.61511	7.56707	7.08045	1.87199	0.878909	1.22374	1.9093	1.04867	1.52905	0.046739	0.230453	0.219873	0.167119	0.295789	0.410291
5,08333333	4.51028	4.15251	4.12243	7.61667	7.56529	7.08257	1.87295	0.877959	1.22361	1.90742	1.04912	1.52683	0.046659	0.229298	0.219081	0.167199	0.293956	0.410187
5,08666667	4.51174	4.16164	4.12439	7.61581	7.56945	7.08011	1.87313	0.874652	1.2204	1.90753	1.04658	1.53121	0.045163	0.232127	0.218004	0.167512	0.297793	0.417989
5,09	4.51566	4.15914	4.12614	7.61822	7.57175	7.08486	1.87274	0.878463	1.2207	1.90612	1.04764	1.5287	0.044375	0.228425	0.218372	0.167367	0.298295	0.408525
5,09333333	4.51697	4.15627	4.12701	7.61892	7.56626	7.08854	1.8728	0.878731	1.21911	1.90545	1.04916	1.53155	0.046137	0.228605	0.21819	0.16571	0.293886	0.40585
5,09666667	4.51931	4.16605	4.12519	7.62042	7.56834	7.08944	1.87355	0.877234	1.21754	1.90767	1.04821	1.53008	0.047239	0.227471	0.21838	0.165842	0.297152	0.415586
5,1	4.52255	4.16139	4.13257	7.62037	7.56517	7.08997	1.87454	0.88158	1.21976	1.9094	1.05102	1.53222	0.046668	0.228106	0.217608	0.166836	0.298607	0.409734
5,10333333	4.52463	4.16293	4.12797	7.62244	7.57159	7.09095	1.8738	0.878922	1.22027	1.90993	1.04368	1.52873	0.047918	0.227765	0.218966	0.165547	0.293739	0.404965
5,10666667	4.52683	4.16613	4.13487	7.62239	7.57218	7.08683	1.87249	0.878569	1.22063	1.90909	1.049	1.52743	0.04948	0.231104	0.217315	0.166539	0.29477	0.416329
5,11	4.5282	4.17084	4.13755	7.62257	7.57141	7.08706	1.87171	0.878773	1.21691	1.91093	1.04818	1.53186	0.048934	0.231302	0.216409	0.16702	0.297635	0.411051
5,11333333	4.5308	4.16959	4.13676	7.62336	7.57463	7.08606	1.8709	0.87689	1.21443	1.9086	1.04674	1.52463	0.04764	0.229011	0.215131	0.165917	0.294288	0.404428
5,11666667	4.53197	4.17201	4.13531	7.62498	7.5759	7.08874	1.8717	0.876606	1.22112	1.90761	1.04893	1.52787	0.046148	0.230289	0.216621	0.165493	0.292836	0.415184
5,12	4.53531	4.17284	4.14192	7.62436	7.58035	7.09604	1.87307	0.877652	1.22057	1.90827	1.05018	1.53479	0.045596	0.230171	0.218066	0.165957	0.29838	0.412784
5,12333333	4.53697	4.17192	4.14255	7.62434	7.57397	7.08833	1.87446	0.875711	1.22118	1.91066	1.04737	1.52839	0.044925	0.230673	0.217154	0.164508	0.295774	0.402919
5,12666667	4.54016	4.17131	4.14932	7.62619	7.5812	7.09421	1.8741	0.881469	1.22141	1.90865	1.04481	1.53061	0.043497	0.231375	0.219151	0.163726	0.293814	0.412689
5,13	4.5415	4.17717	4.15037	7.62699	7.57528	7.09503	1.87347	0.877438	1.22446	1.91208	1.05251	1.53235	0.044366	0.233309	0.219669	0.164429	0.297378	0.414773
5,13333333	4.5447	4.18097	4.1484	7.62607	7.57521	7.09954	1.87491	0.876343	1.21977	1.91193	1.05012	1.52793	0.044969	0.231471	0.219219	0.164947	0.297087	0.402242
5,13666667	4.54562	4.1818	4.14295	7.62748	7.58011	7.0965	1.87408	0.877079	1.22392	1.9137	1.04526	1.5281	0.046295	0.231746	0.216501	0.166032	0.292368	0.409674
5,14	4.54715	4.17759	4.15085	7.62964	7.58323	7.09217	1.87463	0.872743	1.21626	1.91314	1.04845	1.52841	0.043805	0.229128	0.217922	0.168537	0.295292	0.415159
5,14333333	4.54683	4.18293	4.15553	7.63006	7.58012	7.09969	1.87392	0.877979	1.22195	1.91377	1.046	1.53157	0.043582	0.228563	0.217134	0.170808	0.296996	0.40515
5,14666667	4.54806	4.18522	4.1536	7.63087	7.58422	7.09627	1.87504	0.878183	1.21957	1.91102	1.04673	1.53147	0.041019	0.229674	0.219144	0.171206	0.29329	0.409392
5,15	4.55017	4.19091	4.15407	7.63313	7.58136	7.10363	1.87361	0.877395	1.22649	1.91194	1.0458	1.53189	0.04207	0.230683	0.219985	0.170156	0.294712	0.415596
5,15333333	4.55363	4.18854	4.15809	7.63446	7.58397	7.09958	1.87502	0.87658	1.2163	1.91035	1.05078	1.52659	0.04101	0.230713	0.220803	0.169298	0.298167	0.406473
5,15666667	4.55441	4.18888	4.16051	7.63526	7.5813	7.10075	1.87512	0.877682	1.21958	1.90815	1.04973	1.52721	0.043553	0.231856	0.220527	0.169704	0.295171	0.40918
5,16	4.55843	4.19042	4.1618	7.63615	7.58131	7.09783	1.87752	0.878336	1.22161	1.90854	1.04811	1.53254	0.04149	0.229808	0.221789	0.168261	0.29429	0.417327
5,16333333	4.56073	4.18722	4.16446	7.6369	7.58675	7.10323	1.87749	0.878087	1.21941	1.90989	1.05235	1.52626	0.044367	0.227642	0.221395	0.169096	0.297831	0.408948
5,16666667	4.56128	4.19054	4.16235	7.63885	7.58111	7.10459	1.87857	0.877409	1.21744	1.90842	1.04854	1.52739	0.046579	0.227818	0.221483	0.16955	0.295326	0.412059
5,17	4.5611	4.19396	4.16727	7.64011	7.58311	7.11125	1.87863	0.878665	1.22099	1.90489	1.05079	1.52891	0.04706	0.22647	0.22107	0.168669	0.29388	0.420606
5,17333333	4.56353	4.19894	4.16289	7.6404	7.59018	7.10311	1.87796	0.877374	1.22	1.90759	1.04874	1.53001	0.046145	0.224619	0.222407	0.167639	0.298242	0.410491
5,17666667	4.56355	4.19755	4.16759	7.64109	7.58679	7.10505	1.87697	0.880488	1.22227	1.90891	1.04879	1.53024	0.049899	0.225351	0.222923	0.168037	0.296979	0.407017
5,18	4.5664	4.19936	4.17233	7.64165	7.58458	7.10773	1.87944	0.87587	1.22149	1.90873	1.04726	1.52947	0.049832	0.226761	0.222771	0.165167	0.294429	0.416067
5,18333333	4.56788	4.20047	4.17572	7.64109	7.59232	7.10376	1.88026	0.87588	1.22284	1.91004	1.05034	1.52955	0.047509	0.225164	0.221319	0.164627	0.297722	0.408074
5,18666667	4.5718	4.2031	4.1718	7.64122	7.59068	7.10883	1.87868	0.878645	1.22031	1.91197	1.05181	1.52669	0.046051	0.227529	0.221489	0.164943	0.296408	0.404589
5,19	4.57364	4.19679	4.17776	7.64178	7.58645	7.1094	1.87943	0.88314	1.21811	1.90938	1.04412	1.52988	0.045682	0.230832	0.219451	0.166856	0.291666	0.414547
5,19333333	4.57667	4.20449	4.17934	7.64237	7.59314	7.10586	1.88124	0.879147	1.22088	1.90737	1.0474	1.52227	0.04619	0.231159	0.217393	0.165936	0.294937	0.411163
5,19666667	4.57798	4.2035	4.18324	7.64308	7.59166	7.11093	1.87778	0.879792	1.21988	1.90548	1.05129	1.52718	0.045682	0.230238	0.217916	0.168141	0.296831	0.404053
5,2	4.57897	4.20841	4.18248	7.64401	7.58396	7.10881	1.87549	0.880023	1.22242	1.90609	1.04778	1.52717	0.045858	0.229184	0.218693	0.168836	0.2947	0.412714
5,20333333	4.57999	4.21109	4.18214	7.64428	7.59592	7.11363	1.87564	0.878805	1.21813	1.90707	1.05239	1.52935	0.046078	0.228964	0.218112	0.168945	0.295245	0.408432
5,20666667	4.58322	4.20772	4.18165	7.64465	7.59992	7.11555	1.87532	0.881986	1.2218	1.91013	1.04953	1.52622	0.043929	0.228887	0.217775	0.167321	0.298045	0.402307
5,21	4.58373	4.21041	4.18194	7.64563	7.59178	7.11607	1.87455	0.875951	1.22193	1.90933	1.05034	1.5268	0.04355	0.230125	0.217561	0.166481	0.295017	0.410593
5,21333333	4.58406	4.21246	4.19201	7.64745	7.59355	7.11136	1.8753	0.876397	1.22029	1.90884	1.04969	1.52675	0.042589	0.230571	0.218302	0.164928	0.294382	0.412093
5,21666667	4.58673	4.21569	4.19141	7.64858	7.59353	7.11463	1.87551	0.879744	1.21985	1.91046	1.0481	1.5315	0.043088	0.230195	0.219199	0.165745	0.296409	0.403439
5,22	4.59044	4.21763	4.19499	7.65113	7.59873	7.11445	1.87613	0.883405	1.21411	1.90977	1.04774	1.52811	0.044063	0.22849	0.220129	0.166322	0.295696	0.411172
5,22333333	4.59205	4.21516	4.19583	7.65133	7.59481	7.11177	1.87692	0.875888	1.22256	1.90835	1.04748	1.52869	0.045153	0.226372	0.222177	0.166552	0.294211	0.414615
5,22666667	4.5941	4.22248	4.19342	7.65227	7.60503	7.1151	1.87621	0.876918	1.2137	1.90766	1.05378	1.5337	0.044198	0.225798	0.223128	0.167062	0.29721	0.404343
5,23	4.59453	4.22181	4.19404	7.65144	7.60455	7.11323	1.87642	0.879452	1.21791	1.90902	1.05351	1.52315	0.043822	0.224343	0.220166	0.168842	0.296168	0.407193
5,23333333	4.59571	4.21833	4.19549	7.65288	7.60083	7.12045	1.87863	0.878669	1.21838	1.90814	1.04716	1.53036	0.043219	0.227961	0.219136	0.167414	0.29386	0.415258
5,23666667	4.59457	4.22549	4.19894	7.65396	7.59964	7.11621	1.87945	0.880819	1.21717	1.90768	1.04883	1.52696	0.042819	0.230318	0.219137	0.167305	0.295709	0.40523
5,24	4.59582	4.2215	4.20111	7.65553	7.60086	7.11899	1.87904	0.882756	1.21664	1.90859	1.05286	1.52998	0.040334	0.23308	0.218525	0.167275	0.297335	0.404416
5,24333333	4.59536	4.22836	4.19919	7.65601	7.60245	7.11848	1.88037	0.878694	1.21476	1.91086	1.04761	1.52796	0.039879	0.233638	0.218314	0.166772	0.293524	0.414593
5,24666667	4.59903	4.22851	4.20273	7.65766	7.60927	7.12185	1.87987	0.874851	1.2232	1.91116	1.04768	1.52625	0.039651	0.236151	0.220176	0.165029	0.293623	0.408506
5,25	4.60085	4.22869	4.20442	7.65869	7.61016	7.11892	1.87811	0.879578	1.22208	1.90845	1.05095	1.52954	0.039157	0.236122	0.220816	0.164297	0.29634	0.40316
5,25333333	4.60527	4.22889	4.20291	7.65616	7.60695	7.12755	1.87897	0.876269	1.22159	1.90851	1.05008	1.52848	0.038602	0.235511	0.221041	0.162919	0.294011	0.412525
5,25666667	4.60845	4.2319	4.20971	7.65657	7.60797	7.12444	1.87925	0.881004	1.21846	1.90766	1.05278	1.5256	0.041417	0.23316	0.222976	0.163561	0.292326	0.411792
5,26	4.61247	4.23562	4.20605	7.65815	7.60321	7.12439	1.87989	0.87577	1.22072	1.90762	1.04947	1.52952	0.043288	0.232151	0.223988	0.163454	0.296465	0.401708
5,26333333	4.61407	4.23704	4.21266	7.65846	7.60896	7.12479	1.88038	0.881146	1.22121	1.90892	1.05175	1.52816	0.045643	0.231614	0.224296	0.164072	0.29683	0.40819
5,26666667	4.61767	4.23432	4.21212	7.65749	7.6071	7.12481	1.88128	0.877974	1.22145	1.91086	1.0486	1.52419	0.045462	0.230379	0.225798	0.16541	0.293526	0.41382
5,27	4.61752	4.23462	4.21856	7.65935	7.60951	7.12863	1.88088	0.882293	1.22013	1.9106	1.05279	1.53161	0.045923	0.22806	0.224561	0.166712	0.297426	0.405229
5,27333333	4.61844	4.23617	4.21389	7.66068	7.60736	7.12552	1.8809	0.884325	1.21841	1.91239	1.04744	1.5277	0.045992	0.226819	0.222287	0.163902	0.298841	0.406229
5,27666667	4.62041	4.24407	4.22106	7.65979	7.60886	7.13046	1.87995	0.880023	1.21976	1.91132	1.05109	1.52765	0.046802	0.228281	0.219429	0.165516	0.294197	0.417681
5,28	4.6226	4.24116	4.21653	7.65992	7.61321	7.12499	1.88118	0.876672	1.22115	1.90788	1.0515	1.52947	0.044721	0.228651	0.218509	0.165749	0.29598	0.413044
5,28333333	4.62262	4.24456	4.22523	7.65991	7.60851	7.12688	1.88051	0.880852	1.22063	1.90965	1.04902	1.52416	0.045441	0.228864	0.216515	0.165992	0.298895	0.406137
5,28666667	4.62657	4.2426	4.22169	7.66118	7.61785	7.13507	1.88023	0.880033	1.21886	1.91034	1.04886	1.52607	0.046406	0.23072	0.217556	0.166973	0.293871	0.417495
5,29	4.62716	4.24712	4.21771	7.66199	7.61053	7.12951	1.88113	0.883685	1.22228	1.9099	1.04984	1.52825	0.045113	0.231357	0.218283	0.167632	0.291517	0.41639
5,29333333	4.62821	4.2473	4.23026	7.66353	7.61202	7.13562	1.88124	0.879847	1.22108	1.90991	1.0474	1.52991	0.042412	0.229962	0.221374	0.167632	0.296048	0.405141
5,29666667	4.62973	4.25422	4.22754	7.66575	7.61761	7.13377	1.88171	0.880971	1.2179	1.91233	1.05173	1.52696	0.040808	0.228816	0.222613	0.16726	0.293847	0.409982
5,3	4.63079	4.24894	4.22769	7.66875	7.61225	7.12787	1.88408	0.880733	1.21613	1.91085	1.05212	1.53252	0.041528	0.230729	0.224241	0.166949	0.292173	0.415473
5,30333333	4.63112	4.25372	4.23113	7.67042	7.61422	7.13801	1.88448	0.88323	1.22185	1.91165	1.05062	1.52639	0.042988	0.23047	0.223983	0.165556	0.296287	0.402737
5,30666667	4.63358	4.25572	4.22906	7.67043	7.61525	7.13688	1.88501	0.881495	1.22019	1.91211	1.04737	1.52902	0.04732	0.232423	0.224176	0.16654	0.298356	0.403147
5,31	4.63569	4.25511	4.23894	7.67133	7.61643	7.13459	1.88651	0.879038	1.21939	1.91336	1.05457	1.5252	0.048572	0.231102	0.22385	0.16693	0.293934	0.41263
5,31333333	4.63538	4.25518	4.2347	7.67105	7.61697	7.1358	1.88655	0.882424	1.22084	1.91491	1.04886	1.5299	0.051728	0.231474	0.223732	0.167028	0.294922	0.404426
5,31666667	4.63812	4.25335	4.23126	7.67224	7.62338	7.13778	1.88444	0.879463	1.21775	1.91459	1.05204	1.52982	0.050896	0.228576	0.222368	0.167194	0.296912	0.401553
5,32	4.64003	4.26039	4.23326	7.67401	7.62224	7.1383	1.88419	0.881674	1.21252	1.91304	1.0471	1.53474	0.047525	0.231209	0.222643	0.166835	0.293227	0.411477
5,32333333	4.64014	4.25962	4.24149	7.67488	7.61785	7.13543	1.88428	0.878739	1.21518	1.91203	1.05524	1.5294	0.045659	0.231697	0.223764	0.167201	0.292068	0.405604
5,32666667	4.64082	4.26223	4.23888	7.6742	7.61909	7.13957	1.88436	0.88018	1.21982	1.91202	1.04711	1.52401	0.044849	0.2317	0.223282	0.166442	0.296118	0.398376
5,33	4.64493	4.26287	4.2427	7.67536	7.61955	7.14073	1.88407	0.881669	1.21441	1.90973	1.0455	1.52563	0.043526	0.229949	0.221996	0.166644	0.2944	0.408143
5,33333333	4.64593	4.26436	4.24416	7.6747	7.62564	7.14199	1.88319	0.8785	1.21907	1.9089	1.05099	1.52522	0.042293	0.231191	0.222119	0.16685	0.290697	0.406511
5,33666667	4.64695	4.26194	4.25067	7.6741	7.62581	7.14017	1.88427	0.884043	1.21803	1.9085	1.05013	1.52309	0.046005	0.228708	0.222296	0.168135	0.295025	0.398797
5,34	4.64831	4.26419	4.24622	7.67486	7.62288	7.13842	1.88325	0.878664	1.21963	1.90699	1.05069	1.53006	0.048323	0.227566	0.222272	0.168194	0.29528	0.408581
5,34333333	4.65003	4.26586	4.25176	7.67659	7.62847	7.1413	1.88267	0.879244	1.22032	1.9068	1.05133	1.52967	0.051031	0.228451	0.223005	0.167021	0.291947	0.412212
5,34666667	4.652	4.26692	4.24333	7.67696	7.62481	7.14181	1.88259	0.878823	1.21617	1.90778	1.05177	1.52699	0.051365	0.231336	0.224372	0.167222	0.294985	0.402486
5,35	4.65182	4.27177	4.24957	7.67747	7.62063	7.14838	1.88407	0.882663	1.21704	1.90848	1.05022	1.52709	0.054519	0.229699	0.225716	0.165933	0.297978	0.407711
5,35333333	4.65587	4.26731	4.25292	7.67732	7.62545	7.14202	1.88441	0.881878	1.22096	1.90957	1.05006	1.53106	0.052848	0.228654	0.226291	0.164636	0.29409	0.413702
5,35666667	4.65786	4.27254	4.2516	7.67768	7.62794	7.14785	1.88541	0.878093	1.21892	1.91112	1.04873	1.526	0.049213	0.229235	0.22641	0.163966	0.296015	0.40322
5,36	4.65998	4.26989	4.25663	7.67786	7.62462	7.14932	1.88532	0.881175	1.21759	1.9109	1.05094	1.53165	0.048312	0.22928	0.224798	0.165251	0.298878	0.40283
5,36333333	4.65816	4.2747	4.25928	7.67993	7.62443	7.14601	1.8851	0.883711	1.21961	1.91043	1.04969	1.52688	0.050486	0.229702	0.225599	0.166212	0.294392	0.41233
5,36666667	4.66219	4.27396	4.26065	7.68188	7.62927	7.14793	1.88386	0.881768	1.21985	1.91149	1.04859	1.53065	0.051213	0.231526	0.225032	0.166405	0.293737	0.404605
5,37	4.6607	4.27814	4.25936	7.68347	7.62959	7.1526	1.88041	0.880727	1.21626	1.91241	1.05119	1.53262	0.051672	0.231766	0.225273	0.167411	0.296802	0.400428
5,37333333	4.66169	4.27836	4.26368	7.68612	7.6352	7.14636	1.87826	0.884263	1.21936	1.91162	1.05158	1.52469	0.050871	0.232928	0.226024	0.166972	0.293482	0.411248
5,37666667	4.66443	4.27776	4.26282	7.68842	7.63311	7.14601	1.8777	0.879099	1.21983	1.91401	1.05022	1.52829	0.0501	0.234691	0.22763	0.16693	0.290947	0.408954
5,38	4.66873	4.28041	4.2687	7.6876	7.63391	7.14961	1.87987	0.876552	1.22004	1.915	1.0509	1.53049	0.050387	0.231026	0.226568	0.166743	0.296922	0.399435
5,38333333	4.67031	4.28127	4.26767	7.68888	7.63825	7.15232	1.88109	0.882002	1.2173	1.91272	1.05471	1.52933	0.046743	0.229321	0.22474	0.16575	0.295333	0.406321
5,38666667	4.67312	4.28489	4.26782	7.6878	7.63081	7.15537	1.88352	0.883506	1.2135	1.91205	1.05205	1.52589	0.044662	0.229796	0.223607	0.164513	0.292444	0.410444
5,39	4.67399	4.28591	4.2701	7.68701	7.63561	7.15763	1.88516	0.882854	1.22039	1.91356	1.05458	1.52906	0.043875	0.22918	0.220801	0.166074	0.296743	0.399827
5,39333333	4.67517	4.29031	4.27145	7.68645	7.63787	7.159	1.88541	0.883869	1.21781	1.90958	1.05389	1.52433	0.044749	0.227281	0.220406	0.164625	0.297555	0.402644
5,39666667	4.67656	4.28964	4.27344	7.68609	7.63657	7.15732	1.88517	0.88334	1.22152	1.90921	1.04713	1.52475	0.044887	0.228988	0.220299	0.16248	0.292266	0.411613
5,4	4.67831	4.2925	4.26884	7.68536	7.63607	7.15715	1.88486	0.885296	1.21518	1.91017	1.05343	1.52735	0.047301	0.230144	0.220828	0.162523	0.294428	0.404538
5,40333333	4.67915	4.29174	4.27637	7.68809	7.64023	7.15859	1.88399	0.874539	1.21654	1.9084	1.05133	1.53097	0.050447	0.229882	0.220742	0.163542	0.297554	0.399816
5,40666667	4.68191	4.28913	4.27959	7.6886	7.63556	7.15971	1.88324	0.87792	1.21344	1.90771	1.04879	1.53236	0.051701	0.227544	0.221711	0.162102	0.29231	0.411076
5,41	4.68338	4.29526	4.27878	7.68952	7.63708	7.15755	1.88173	0.882962	1.21986	1.91156	1.05263	1.52666	0.053837	0.226702	0.221644	0.16338	0.292565	0.408766
5,41333333	4.68625	4.2964	4.28035	7.69225	7.64128	7.15548	1.88146	0.881011	1.21907	1.91231	1.04987	1.52575	0.052779	0.226854	0.221714	0.162867	0.297202	0.400587
5,41666667	4.6862	4.29503	4.28405	7.69431	7.64212	7.16564	1.88169	0.884445	1.21635	1.91221	1.05425	1.52293	0.052768	0.225163	0.222615	0.163086	0.294754	0.409003
5,42	4.68972	4.29972	4.28996	7.69457	7.64077	7.16109	1.88217	0.880752	1.21553	1.91343	1.05356	1.52748	0.049583	0.226842	0.221542	0.164701	0.292585	0.41285
5,42333333	4.69077	4.29628	4.28668	7.6961	7.64314	7.16264	1.88151	0.882493	1.21974	1.91299	1.0525	1.52666	0.047749	0.226888	0.221496	0.165971	0.298475	0.402286
5,42666667	4.69192	4.29867	4.28696	7.69673	7.64041	7.16116	1.88382	0.88045	1.21606	1.91141	1.04953	1.52511	0.045679	0.22887	0.220878	0.164983	0.296819	0.405181
5,43	4.69112	4.30236	4.29021	7.6974	7.64427	7.16237	1.88162	0.884981	1.22177	1.91032	1.05364	1.52724	0.044875	0.228038	0.221505	0.168443	0.292784	0.414518
5,43333333	4.69544	4.3049	4.28362	7.6963	7.64515	7.16023	1.88201	0.884045	1.21836	1.9117	1.05098	1.52889	0.043852	0.229871	0.219295	0.170247	0.296483	0.406923
5,43666667	4.69755	4.30105	4.28829	7.69672	7.64537	7.16054	1.88248	0.881192	1.21515	1.91192	1.05058	1.52652	0.047474	0.228099	0.221306	0.167818	0.297401	0.403229
5,44	4.7018	4.30213	4.2884	7.69633	7.64967	7.16558	1.88307	0.880037	1.22025	1.91168	1.05353	1.5271	0.051458	0.22922	0.222243	0.167973	0.291998	0.414442
5,44333333	4.70489	4.30608	4.2904	7.69622	7.64405	7.16316	1.8817	0.88236	1.216	1.9111	1.05496	1.52532	0.049046	0.226768	0.223563	0.16915	0.293328	0.410735
5,44666667	4.70852	4.30947	4.29631	7.69695	7.64591	7.16394	1.88239	0.881221	1.21291	1.91418	1.04926	1.53307	0.047753	0.228495	0.2225	0.165649	0.297343	0.399954
5,45	4.70965	4.31036	4.29521	7.69893	7.64514	7.16341	1.88207	0.88317	1.21532	1.9144	1.04828	1.52879	0.047719	0.228295	0.222896	0.163868	0.292704	0.406044
5,45333333	4.71102	4.31101	4.29237	7.6994	7.6523	7.16981	1.88092	0.880904	1.21786	1.91763	1.04857	1.52579	0.045229	0.228715	0.224348	0.164262	0.291819	0.409925
5,45666667	4.71156	4.30757	4.29999	7.70048	7.6458	7.16854	1.88099	0.877399	1.21549	1.91829	1.04696	1.52567	0.044205	0.23046	0.224816	0.163761	0.296733	0.397371
5,46	4.71205	4.31507	4.29749	7.7032	7.64861	7.16686	1.88131	0.882647	1.21832	1.91797	1.05111	1.52897	0.044982	0.233416	0.22504	0.164131	0.295672	0.402057
5,46333333	4.7109	4.31353	4.29995	7.70447	7.64613	7.16966	1.8807	0.881529	1.21951	1.91337	1.05385	1.52578	0.044783	0.233579	0.226835	0.167253	0.292736	0.410858
5,46666667	4.71034	4.31382	4.3042	7.70479	7.64537	7.1712	1.8808	0.878514	1.22363	1.91353	1.0517	1.52489	0.045002	0.234674	0.229968	0.169287	0.298007	0.402821
5,47	4.71328	4.31722	4.30724	7.70571	7.65322	7.17171	1.88131	0.879753	1.21959	1.90874	1.05355	1.527	0.044712	0.235384	0.228764	0.167447	0.296148	0.402326
5,47333333	4.71454	4.31478	4.30516	7.70693	7.65048	7.17034	1.88043	0.881409	1.21811	1.91083	1.05101	1.53147	0.04496	0.234387	0.22744	0.16727	0.292905	0.412634
5,47666667	4.71563	4.32064	4.30218	7.70639	7.64944	7.16951	1.88101	0.878837	1.21986	1.9114	1.05447	1.53164	0.045895	0.233356	0.22853	0.16558	0.296432	0.405781
5,48	4.71854	4.32187	4.31035	7.70634	7.65495	7.16892	1.88151	0.882753	1.21522	1.91423	1.05306	1.52535	0.046101	0.233755	0.228191	0.163656	0.295271	0.401702
5,48333333	4.72021	4.31673	4.30993	7.7077	7.65126	7.17762	1.88149	0.880996	1.21442	1.91247	1.05265	1.52765	0.046008	0.232523	0.227307	0.160774	0.290539	0.411777
5,48666667	4.71815	4.32016	4.31471	7.70795	7.65162	7.17262	1.88228	0.881211	1.21556	1.91543	1.05401	1.52401	0.046308	0.232769	0.228953	0.161592	0.294082	0.405863
5,49	4.71907	4.3234	4.30781	7.70861	7.65388	7.17578	1.88295	0.883096	1.21787	1.91344	1.05338	1.52575	0.045978	0.232544	0.229602	0.161733	0.294163	0.39947
5,49333333	4.72078	4.32423	4.31382	7.70879	7.64823	7.17542	1.8825	0.875685	1.21901	1.91546	1.05168	1.5234	0.046909	0.23392	0.228946	0.163311	0.290595	0.408549
5,49666667	4.72105	4.32643	4.31697	7.70975	7.65972	7.1781	1.88216	0.880868	1.21696	1.91472	1.0532	1.5285	0.048217	0.2331	0.227304	0.163058	0.293896	0.406946
5,5	4.72417	4.32541	4.31669	7.71025	7.65799	7.17849	1.88126	0.88645	1.21408	1.91607	1.05053	1.52879	0.049197	0.233059	0.225192	0.163999	0.296295	0.39746
5,50333333	4.72564	4.32646	4.31489	7.71115	7.66122	7.17736	1.87975	0.880897	1.21764	1.91468	1.05161	1.52921	0.050172	0.229552	0.223468	0.165383	0.293186	0.408403
5,50666667	4.72849	4.33239	4.31821	7.71053	7.66196	7.18114	1.87987	0.882352	1.21613	1.91577	1.05416	1.52375	0.050175	0.228958	0.224414	0.166408	0.294225	0.410935
5,51	4.72865	4.33777	4.32193	7.71195	7.65731	7.17707	1.87979	0.880287	1.21496	1.91235	1.05509	1.52994	0.050747	0.229158	0.223743	0.164801	0.295409	0.400625
5,51333333	4.73157	4.32951	4.32202	7.71141	7.65911	7.18155	1.88026	0.878963	1.21849	1.91189	1.05504	1.52676	0.052613	0.230085	0.226066	0.164801	0.291433	0.405882
5,51666667	4.73374	4.33104	4.32216	7.71283	7.65837	7.17495	1.88045	0.885681	1.21392	1.91057	1.05208	1.52787	0.052804	0.230354	0.229516	0.164841	0.292879	0.411752
5,52	4.7367	4.33683	4.32425	7.71449	7.66129	7.18297	1.88094	0.882226	1.21589	1.91139	1.05048	1.52736	0.051583	0.231653	0.228854	0.163916	0.294672	0.401009
5,52333333	4.73597	4.33625	4.32497	7.71681	7.66059	7.18186	1.88091	0.883169	1.21594	1.90745	1.05315	1.52584	0.052263	0.234506	0.22934	0.162229	0.293031	0.401977
5,52666667	4.73872	4.33518	4.32783	7.71807	7.66215	7.18395	1.88164	0.882611	1.21548	1.90837	1.05065	1.52874	0.050899	0.233275	0.229186	0.164162	0.292447	0.410306
5,53	4.74031	4.34035	4.32657	7.72055	7.66331	7.18456	1.88115	0.880728	1.21854	1.90913	1.05299	1.52996	0.047717	0.232077	0.228695	0.164192	0.295714	0.402377
5,53333333	4.73996	4.33669	4.32943	7.72084	7.66236	7.18527	1.88238	0.882226	1.21137	1.91012	1.05422	1.52775	0.048589	0.232686	0.225465	0.164358	0.29245	0.398051
5,53666667	4.74089	4.33836	4.32772	7.72005	7.6644	7.18404	1.88325	0.879228	1.21505	1.90821	1.05458	1.53175	0.052198	0.230839	0.226256	0.16405	0.293828	0.408379
5,54	4.74337	4.34031	4.3308	7.72189	7.66459	7.18558	1.88511	0.883312	1.2183	1.91163	1.05576	1.52675	0.053373	0.226984	0.222978	0.16519	0.296623	0.403211
5,54333333	4.74483	4.34201	4.33303	7.72071	7.66517	7.18515	1.88365	0.877695	1.21508	1.91184	1.05423	1.52445	0.053281	0.226638	0.223734	0.163578	0.295413	0.398193
5,54666667	4.74586	4.33924	4.33622	7.72175	7.67189	7.18628	1.88456	0.884653	1.21815	1.91128	1.05247	1.53068	0.053072	0.228533	0.223544	0.164652	0.29485	0.407341
5,55	4.74705	4.34249	4.33552	7.72224	7.66523	7.19309	1.88447	0.880914	1.21447	1.91075	1.05775	1.5233	0.051146	0.228538	0.2259	0.165125	0.296799	0.409484
5,55333333	4.74898	4.34377	4.33932	7.72326	7.66707	7.19517	1.88577	0.884673	1.2182	1.91467	1.05366	1.52666	0.046864	0.231513	0.227117	0.166129	0.292942	0.398477
5,55666667	4.74885	4.3477	4.34083	7.72237	7.67114	7.18935	1.88549	0.877092	1.21644	1.91235	1.05478	1.52244	0.045616	0.232862	0.228796	0.165327	0.292952	0.407474
5,56	4.74968	4.34791	4.33983	7.72468	7.66925	7.19291	1.88701	0.881332	1.21814	1.91329	1.05035	1.5253	0.047705	0.231864	0.22727	0.16605	0.295972	0.410042
5,56333333	4.75055	4.35022	4.34196	7.72429	7.67283	7.19392	1.88776	0.877651	1.21418	1.91392	1.0535	1.52679	0.050518	0.228378	0.2269	0.1647	0.29384	0.39972
5,56666667	4.75148	4.35596	4.34545	7.72479	7.6665	7.19144	1.88827	0.878151	1.21666	1.91625	1.05224	1.5269	0.05297	0.22767	0.227589	0.16364	0.294708	0.401788
5,57	4.75235	4.35058	4.33999	7.72533	7.67327	7.19604	1.88708	0.880999	1.2148	1.91671	1.05272	1.52494	0.056388	0.226173	0.228623	0.163457	0.29577	0.410623
5,57333333	4.75503	4.3516	4.34518	7.72571	7.67723	7.20518	1.88719	0.881342	1.21439	1.91888	1.05339	1.52595	0.056872	0.226325	0.228422	0.163671	0.293302	0.401983
5,57666667	4.75751	4.35286	4.34774	7.72719	7.67314	7.19486	1.88847	0.880271	1.21598	1.92003	1.05194	1.52864	0.054703	0.227476	0.231002	0.16258	0.293704	0.39825
5,58	4.75785	4.35288	4.3473	7.72739	7.67032	7.19376	1.88939	0.883296	1.21497	1.921	1.05345	1.52903	0.051136	0.229089	0.2308	0.161655	0.294012	0.40881
5,58333333	4.76016	4.35345	4.34841	7.72809	7.67572	7.19408	1.89002	0.880437	1.21647	1.91818	1.05267	1.52501	0.046594	0.228816	0.230381	0.162243	0.291118	0.404702
5,58666667	4.76411	4.36041	4.35025	7.73061	7.67704	7.19591	1.8919	0.882001	1.22047	1.91648	1.05436	1.52554	0.045954	0.229019	0.227569	0.161774	0.293856	0.39689
5,59	4.76561	4.35856	4.35025	7.73209	7.67429	7.19404	1.89323	0.879022	1.21653	1.91664	1.054	1.52971	0.044118	0.229956	0.229097	0.160587	0.291976	0.404251
5,59333333	4.76515	4.36233	4.35158	7.73142	7.67482	7.19693	1.89244	0.882435	1.21839	1.91472	1.05283	1.52346	0.046281	0.228917	0.227405	0.162101	0.290591	0.408591
5,59666667	4.76865	4.35721	4.35728	7.73305	7.67805	7.20221	1.89268	0.885105	1.21722	1.91246	1.05153	1.52689	0.048543	0.228791	0.227513	0.164049	0.294701	0.397715
5,6	4.76998	4.36469	4.35279	7.73474	7.67471	7.19872	1.89362	0.879244	1.213	1.9139	1.05041	1.52873	0.05172	0.230784	0.228003	0.163929	0.294497	0.399736
5,60333333	4.77018	4.36633	4.35966	7.7336	7.67905	7.1981	1.89436	0.882571	1.21893	1.91127	1.05231	1.52233	0.048573	0.232864	0.227522	0.16484	0.295438	0.40852
5,60666667	4.77102	4.36619	4.35792	7.73434	7.67603	7.20189	1.89437	0.879561	1.21831	1.91159	1.05112	1.52879	0.050233	0.233822	0.227612	0.167365	0.298645	0.398817
5,61	4.77186	4.36897	4.35591	7.73622	7.68061	7.20094	1.89429	0.882967	1.21666	1.9114	1.05298	1.52495	0.047484	0.234675	0.228409	0.166304	0.297048	0.395148
5,61333333	4.77384	4.37012	4.35991	7.73617	7.68043	7.2002	1.89366	0.880426	1.21836	1.91407	1.05504	1.52929	0.046605	0.236059	0.230498	0.164464	0.296587	0.407312
5,61666667	4.77586	4.37127	4.36105	7.73757	7.68274	7.20274	1.89257	0.882648	1.21668	1.91494	1.0559	1.52594	0.046013	0.236215	0.229533	0.165143	0.29699	0.404873
5,62	4.77825	4.37222	4.36503	7.73814	7.67839	7.204	1.89074	0.885008	1.21653	1.91734	1.05327	1.5289	0.047173	0.236752	0.230404	0.164256	0.292895	0.396127
5,62333333	4.7786	4.37211	4.3621	7.73802	7.68228	7.20475	1.89043	0.878454	1.21766	1.9162	1.05571	1.52445	0.047667	0.236657	0.23067	0.161038	0.294355	0.405041
5,62666667	4.78155	4.36859	4.36648	7.73819	7.68129	7.19933	1.89066	0.879882	1.21471	1.91781	1.05541	1.52459	0.049458	0.237533	0.229677	0.160439	0.294374	0.407222
5,63	4.78174	4.37448	4.36653	7.73833	7.68103	7.2074	1.89015	0.882673	1.21873	1.91492	1.05516	1.526	0.050987	0.237082	0.228672	0.160531	0.293611	0.396203
5,63333333	4.78461	4.37414	4.36635	7.73688	7.68504	7.20787	1.89044	0.882452	1.21435	1.91418	1.05644	1.52759	0.052332	0.236765	0.229734	0.160681	0.294543	0.399042
5,63666667	4.78467	4.37276	4.37383	7.73795	7.67982	7.20859	1.8889	0.887029	1.21108	1.91092	1.0547	1.52365	0.054203	0.235789	0.229824	0.161102	0.296818	0.406275
5,64	4.78836	4.38097	4.36661	7.73935	7.68023	7.20375	1.88892	0.885072	1.21447	1.91177	1.05381	1.52793	0.053813	0.23286	0.229077	0.16309	0.294464	0.398127
5,64333333	4.7912	4.37913	4.37677	7.74067	7.68654	7.20987	1.88965	0.880998	1.22609	1.91316	1.04811	1.52902	0.053357	0.231561	0.231181	0.162596	0.294606	0.397824
5,64666667	4.794	4.37724	4.37044	7.742	7.6839	7.20877	1.89139	0.881222	1.2135	1.91489	1.05632	1.52606	0.05023	0.230831	0.227663	0.163887	0.294855	0.407253
5,65	4.79574	4.38	4.37361	7.74463	7.6871	7.21388	1.89137	0.883741	1.21701	1.91556	1.057	1.52412	0.050434	0.229781	0.226691	0.164839	0.292291	0.400237
5,65333333	4.79794	4.37672	4.37777	7.74677	7.68546	7.21171	1.89341	0.883171	1.2194	1.91941	1.05759	1.52439	0.051166	0.230202	0.228327	0.164594	0.292889	0.397708
5,65666667	4.79964	4.38051	4.37833	7.74674	7.69046	7.21086	1.8927	0.882802	1.21312	1.91921	1.05382	1.52183	0.051014	0.23187	0.227279	0.164457	0.29223	0.407892
5,66	4.80006	4.38416	4.37576	7.746	7.68778	7.21464	1.8935	0.882936	1.21684	1.91952	1.05213	1.5201	0.050988	0.231787	0.225006	0.166973	0.293178	0.401211
5,66333333	4.80144	4.38904	4.37872	7.74678	7.68855	7.21513	1.89331	0.88236	1.21626	1.91985	1.05275	1.52538	0.05403	0.230834	0.228508	0.166219	0.291858	0.396135
5,66666667	4.80019	4.38722	4.38278	7.74548	7.69097	7.21114	1.89412	0.881653	1.22311	1.92016	1.05509	1.51963	0.052737	0.229813	0.227953	0.163569	0.294414	0.406669
5,67	4.80135	4.38748	4.38244	7.74552	7.69536	7.21592	1.8939	0.880174	1.21626	1.92086	1.05141	1.52842	0.050403	0.228502	0.226139	0.162295	0.294867	0.401167
5,67333333	4.80176	4.38626	4.37957	7.74619	7.69063	7.21323	1.8951	0.879986	1.21509	1.92293	1.05432	1.52543	0.050684	0.230277	0.226296	0.162399	0.293587	0.394288
5,67666667	4.80296	4.38359	4.38298	7.74768	7.69666	7.21566	1.89492	0.879362	1.21778	1.92206	1.05471	1.52383	0.0503	0.229103	0.227913	0.161524	0.296058	0.405554
5,68	4.80311	4.38903	4.3855	7.74912	7.69413	7.21429	1.89465	0.88063	1.21572	1.92083	1.05432	1.52355	0.050183	0.22925	0.228896	0.162857	0.294191	0.403713
5,68333333	4.80288	4.3906	4.38894	7.7512	7.69498	7.21105	1.89504	0.877943	1.2155	1.92133	1.05052	1.52668	0.052118	0.230994	0.228211	0.163561	0.296211	0.395806
5,68666667	4.80532	4.38679	4.39176	7.75161	7.6902	7.21563	1.89714	0.881236	1.21588	1.9193	1.05422	1.52607	0.051387	0.232413	0.228819	0.164203	0.294071	0.406915
5,69	4.80694	4.39241	4.39022	7.7524	7.6919	7.22028	1.89797	0.884579	1.21037	1.91747	1.05356	1.52199	0.049351	0.232673	0.228654	0.162782	0.29692	0.405416
5,69333333	4.80861	4.39158	4.39182	7.75249	7.69148	7.21906	1.89828	0.879242	1.21944	1.91748	1.055	1.52697	0.049389	0.237022	0.229332	0.161017	0.294002	0.397756
5,69666667	4.80963	4.39647	4.38951	7.75234	7.69742	7.21859	1.89804	0.883419	1.21609	1.91958	1.05077	1.52451	0.049287	0.238942	0.22692	0.160411	0.29442	0.405168
5,7	4.8118	4.39803	4.38999	7.75237	7.6936	7.22045	1.898	0.885878	1.21792	1.91915	1.05519	1.52641	0.048398	0.237486	0.226881	0.160982	0.295128	0.4093
5,70333333	4.81054	4.39127	4.39415	7.75384	7.69725	7.2221	1.8968	0.883694	1.21612	1.91833	1.0554	1.5283	0.051556	0.236581	0.227097	0.163031	0.293079	0.397476
5,70666667	4.81099	4.40092	4.39372	7.7558	7.70008	7.22836	1.89705	0.886056	1.21767	1.91957	1.05492	1.5232	0.052473	0.234733	0.228698	0.165237	0.295787	0.405489
5,71	4.81114	4.39741	4.39929	7.75679	7.69863	7.224	1.89651	0.879262	1.21147	1.91886	1.05356	1.52683	0.050304	0.231913	0.22643	0.165328	0.295386	0.407634
5,71333333	4.81033	4.39966	4.39734	7.75845	7.69844	7.22564	1.89772	0.882988	1.21483	1.91919	1.05386	1.52385	0.050119	0.230347	0.227219	0.165557	0.296947	0.396008
5,71666667	4.81285	4.40357	4.39968	7.76015	7.6982	7.2257	1.89821	0.880372	1.21647	1.91809	1.05259	1.52545	0.050514	0.229831	0.228044	0.164068	0.293453	0.398104
5,72	4.81659	4.40365	4.40414	7.76001	7.69794	7.22611	1.89931	0.880312	1.21553	1.92105	1.05243	1.52371	0.048457	0.229697	0.227726	0.163882	0.293405	0.405958
5,72333333	4.8187	4.40519	4.4006	7.75996	7.7	7.2272	1.8974	0.887901	1.21852	1.91937	1.05169	1.52217	0.049657	0.232688	0.226332	0.162169	0.290997	0.394366
5,72666667	4.82196	4.40566	4.40258	7.76136	7.69993	7.22856	1.89741	0.880452	1.21526	1.92047	1.05571	1.5268	0.049533	0.23137	0.227083	0.162796	0.290526	0.397625
5,73	4.82628	4.40513	4.40614	7.76202	7.70257	7.23139	1.89618	0.881225	1.21532	1.91973	1.05488	1.52511	0.049738	0.230562	0.227075	0.163623	0.29208	0.407667
5,73333333	4.82838	4.41231	4.40603	7.76154	7.7039	7.22596	1.89592	0.88042	1.21524	1.9208	1.05492	1.52321	0.047016	0.232831	0.228226	0.164236	0.291663	0.400676
5,73666667	4.83021	4.40918	4.40734	7.76401	7.70112	7.23332	1.89493	0.885696	1.21537	1.91922	1.05253	1.52386	0.046631	0.23278	0.228858	0.163004	0.296316	0.398057
5,74	4.83087	4.40791	4.41027	7.76479	7.70621	7.2323	1.89566	0.885308	1.21464	1.91962	1.05527	1.52398	0.045302	0.230776	0.228562	0.164214	0.294147	0.408152
5,74333333	4.82987	4.41122	4.41024	7.76591	7.71212	7.23185	1.89481	0.886005	1.21884	1.91807	1.05282	1.52446	0.049029	0.232063	0.227276	0.165271	0.295881	0.401107
5,74666667	4.83048	4.40991	4.41334	7.76557	7.70548	7.22542	1.89621	0.883407	1.21643	1.91765	1.0539	1.523	0.052539	0.232563	0.22903	0.165075	0.29393	0.396673
5,75	4.83121	4.41293	4.41189	7.76691	7.71179	7.23918	1.89615	0.884347	1.21	1.91651	1.05166	1.52579	0.054937	0.230479	0.229561	0.16592	0.295097	0.405213
5,75333333	4.83179	4.41506	4.4171	7.76646	7.70638	7.23131	1.89703	0.883689	1.2132	1.91694	1.05533	1.52066	0.057084	0.232689	0.229755	0.166695	0.292769	0.4005
5,75666667	4.83408	4.41641	4.41341	7.76726	7.70419	7.23567	1.89706	0.881625	1.21493	1.91801	1.06	1.52042	0.059293	0.232337	0.230789	0.165972	0.293815	0.39572
5,76	4.83669	4.41911	4.41975	7.7675	7.71296	7.23277	1.89871	0.883839	1.21142	1.91965	1.05366	1.52455	0.058951	0.232372	0.233403	0.166151	0.295094	0.405697
5,76333333	4.8399	4.41791	4.415	7.76976	7.70746	7.23362	1.8984	0.880948	1.21108	1.91764	1.05509	1.52455	0.055567	0.235021	0.234119	0.165193	0.293112	0.403529
5,76666667	4.84098	4.42079	4.41722	7.77164	7.70896	7.23809	1.89849	0.881545	1.2135	1.9173	1.05433	1.5267	0.053306	0.237568	0.234137	0.164858	0.295288	0.39525
5,77	4.84152	4.42069	4.41881	7.77219	7.70967	7.23605	1.89698	0.879603	1.21476	1.91893	1.05871	1.52527	0.051776	0.23397	0.233013	0.164203	0.294274	0.406336
5,77333333	4.84171	4.42128	4.41891	7.77351	7.71112	7.2354	1.8959	0.883852	1.21271	1.91662	1.05272	1.52562	0.050689	0.233213	0.233636	0.163192	0.297199	0.405895
5,77666667	4.84301	4.41913	4.42134	7.77462	7.71738	7.23133	1.89474	0.883535	1.21519	1.91418	1.05199	1.52525	0.047006	0.234498	0.233402	0.16228	0.294725	0.394375
5,78	4.84219	4.42131	4.4212	7.77398	7.71607	7.24295	1.89549	0.878764	1.21413	1.91819	1.05595	1.52659	0.048111	0.231538	0.231825	0.1619	0.29813	0.399956
5,78333333	4.84391	4.4233	4.42429	7.7736	7.71366	7.23414	1.89418	0.886003	1.21725	1.92008	1.05357	1.52407	0.048942	0.229713	0.229654	0.161552	0.295551	0.406058
5,78666667	4.84502	4.42095	4.41952	7.77415	7.71386	7.23585	1.89429	0.883651	1.21849	1.91932	1.05708	1.52456	0.0485	0.231684	0.231041	0.161314	0.295545	0.392712
5,79	4.84713	4.42423	4.42758	7.77319	7.71342	7.24598	1.89648	0.88004	1.21604	1.92057	1.0517	1.52352	0.050087	0.232247	0.230186	0.162567	0.294176	0.396755
5,79333333	4.84824	4.42795	4.42798	7.77251	7.71662	7.24448	1.89871	0.885291	1.21925	1.92154	1.05297	1.52132	0.053776	0.231506	0.22966	0.16353	0.293591	0.404635
5,79666667	4.85026	4.42655	4.42523	7.77395	7.71636	7.23872	1.89733	0.881611	1.21354	1.92078	1.05602	1.52574	0.053573	0.229917	0.229652	0.162277	0.294051	0.395699
5,8	4.84995	4.42666	4.43037	7.77556	7.71593	7.24627	1.89965	0.881353	1.21705	1.92116	1.05125	1.52645	0.054873	0.230442	0.23109	0.162227	0.292491	0.392308
5,80333333	4.85277	4.43045	4.42884	7.77779	7.7207	7.24257	1.90143	0.882246	1.2173	1.91754	1.05882	1.52473	0.057193	0.231523	0.22944	0.162944	0.295364	0.403089
5,80666667	4.85132	4.43044	4.43059	7.77971	7.71523	7.2434	1.90191	0.885308	1.21412	1.91823	1.05167	1.52105	0.052211	0.232928	0.230477	0.162417	0.2926	0.395134
5,81	4.85186	4.42949	4.43197	7.77999	7.71688	7.24409	1.90022	0.884414	1.21113	1.91975	1.05451	1.52468	0.049594	0.231545	0.230529	0.162073	0.293545	0.390113
5,81333333	4.8531	4.4346	4.43624	7.78073	7.71623	7.24349	1.90221	0.883589	1.21297	1.91999	1.0547	1.52543	0.048331	0.232626	0.230889	0.164017	0.292663	0.400855
5,81666667	4.85469	4.43448	4.43248	7.77987	7.7179	7.24485	1.90125	0.881597	1.21652	1.91807	1.0562	1.52545	0.047482	0.233185	0.22943	0.165022	0.29285	0.400884
5,82	4.85598	4.43595	4.4355	7.77962	7.72459	7.24434	1.89957	0.88048	1.21427	1.9217	1.05399	1.52656	0.049901	0.232815	0.230255	0.163668	0.293386	0.392448
5,82333333	4.85956	4.43487	4.43644	7.78067	7.72081	7.25166	1.89711	0.888311	1.21338	1.92158	1.05366	1.52355	0.05481	0.229164	0.22947	0.163926	0.291936	0.401028
5,82666667	4.86179	4.43806	4.43855	7.78132	7.71843	7.24605	1.89687	0.883385	1.21472	1.91917	1.0569	1.52942	0.057703	0.227401	0.230943	0.164154	0.293644	0.405825
5,83	4.86116	4.43987	4.43849	7.78253	7.72872	7.25338	1.89442	0.886716	1.22043	1.91839	1.05728	1.52277	0.058477	0.228746	0.231624	0.162905	0.291906	0.395331
5,83333333	4.86213	4.44134	4.43937	7.78466	7.72596	7.25353	1.89411	0.881987	1.2142	1.91807	1.05596	1.5226	0.057409	0.228469	0.231542	0.162758	0.293431	0.396769
5,83666667	4.86651	4.44373	4.44274	7.78637	7.71857	7.25202	1.89619	0.884585	1.21375	1.91783	1.06061	1.52554	0.054039	0.225981	0.230796	0.162825	0.291973	0.405794
5,84	4.86869	4.44132	4.43793	7.78534	7.72314	7.25308	1.89751	0.881247	1.21549	1.91665	1.0547	1.52596	0.053063	0.228015	0.230294	0.161157	0.292609	0.397684
5,84333333	4.8705	4.44301	4.44409	7.78798	7.72285	7.25236	1.89852	0.886325	1.21574	1.91891	1.0575	1.52329	0.052968	0.23057	0.22833	0.161532	0.2928	0.394726
5,84666667	4.87296	4.4401	4.44762	7.78787	7.72559	7.25419	1.90037	0.880134	1.21029	1.91915	1.05849	1.52223	0.050894	0.232402	0.226467	0.161666	0.291324	0.405465
5,85	4.87558	4.44122	4.44691	7.78679	7.7272	7.25228	1.90096	0.884454	1.21241	1.92019	1.05286	1.524	0.052876	0.233494	0.227762	0.161548	0.293325	0.400527
5,85333333	4.87383	4.4463	4.44121	7.78659	7.72651	7.25562	1.90071	0.886249	1.21105	1.92229	1.05504	1.52475	0.051846	0.235905	0.228426	0.1622	0.29254	0.392717
5,85666667	4.87538	4.44382	4.4465	7.788	7.72574	7.25954	1.90128	0.882516	1.21183	1.92293	1.05103	1.52784	0.052582	0.234209	0.228769	0.163905	0.295361	0.402587
5,86	4.87601	4.44457	4.44752	7.78795	7.73269	7.25873	1.90014	0.882907	1.21621	1.92155	1.05468	1.52303	0.050524	0.234172	0.229657	0.163485	0.29268	0.400754
5,86333333	4.87699	4.45097	4.45387	7.78841	7.72837	7.25291	1.89894	0.884419	1.21379	1.92043	1.05636	1.51708	0.051603	0.233507	0.231246	0.164936	0.293615	0.390349
5,86666667	4.87881	4.44755	4.45188	7.78878	7.73136	7.25645	1.89853	0.883604	1.21131	1.91963	1.05406	1.52055	0.052232	0.232008	0.230081	0.163685	0.29284	0.396484
5,87	4.87925	4.45147	4.45494	7.79164	7.7339	7.25555	1.8988	0.883429	1.21408	1.91723	1.05405	1.52382	0.053512	0.230883	0.230395	0.162885	0.291155	0.402124
5,87333333	4.87925	4.45071	4.44869	7.7922	7.72788	7.25759	1.89871	0.880598	1.21762	1.91867	1.05123	1.52414	0.050004	0.235448	0.231722	0.16244	0.292124	0.38912
5,87666667	4.87945	4.4547	4.45598	7.7919	7.73	7.25913	1.89886	0.882389	1.21427	1.91873	1.05421	1.52294	0.049434	0.236371	0.22945	0.162369	0.291583	0.392657
5,88	4.88144	4.45565	4.45664	7.79265	7.73184	7.25937	1.90014	0.887675	1.21876	1.91877	1.05566	1.52492	0.051255	0.235034	0.228599	0.162303	0.293787	0.402295
5,88333333	4.88183	4.45534	4.45587	7.79363	7.73736	7.26149	1.89947	0.881002	1.21546	1.92001	1.05695	1.52208	0.049139	0.2349	0.230302	0.162652	0.292522	0.397489
5,88666667	4.88279	4.45671	4.45712	7.79107	7.73371	7.25919	1.90023	0.883688	1.21321	1.92082	1.05752	1.52619	0.047116	0.234632	0.231066	0.162544	0.29514	0.392425
5,89	4.88316	4.45444	4.45763	7.79224	7.73437	7.26097	1.90055	0.881717	1.22094	1.92146	1.05258	1.52502	0.047729	0.230167	0.230321	0.162886	0.2926	0.403957
5,89333333	4.88441	4.45647	4.45892	7.79256	7.74041	7.26533	1.90309	0.881405	1.21435	1.92213	1.05431	1.52446	0.050509	0.229143	0.23166	0.162415	0.294462	0.40069
5,89666667	4.88458	4.45772	4.46226	7.79319	7.73237	7.26215	1.9027	0.886	1.2103	1.9228	1.05291	1.52158	0.049346	0.230361	0.231123	0.161299	0.29389	0.391838
5,9	4.88457	4.45836	4.46069	7.79464	7.73546	7.26583	1.90388	0.885084	1.21405	1.92434	1.05669	1.52698	0.050276	0.231796	0.229686	0.160867	0.292977	0.398731
5,90333333	4.88548	4.46065	4.46439	7.79768	7.73878	7.2652	1.90377	0.880411	1.2159	1.92077	1.05415	1.52212	0.052212	0.233292	0.229437	0.162894	0.293641	0.4018
5,90666667	4.88784	4.46368	4.46641	7.79751	7.73657	7.26876	1.90465	0.879972	1.21514	1.92036	1.05469	1.52138	0.055927	0.235006	0.228266	0.163936	0.293026	0.392604
5,91	4.88848	4.46386	4.46777	7.79904	7.73124	7.26576	1.90324	0.882227	1.21512	1.92127	1.05728	1.52458	0.054402	0.236265	0.229488	0.163168	0.294609	0.398675
5,91333333	4.89042	4.4614	4.46701	7.79866	7.73848	7.26359	1.90409	0.884952	1.21681	1.92187	1.05378	1.52517	0.053723	0.236627	0.228473	0.164424	0.293326	0.40606
5,91666667	4.8923	4.46519	4.47816	7.80122	7.74179	7.26549	1.9042	0.884813	1.21198	1.91844	1.058	1.51996	0.054942	0.23428	0.22928	0.164947	0.29443	0.397816
5,92	4.89511	4.46583	4.46698	7.80199	7.73843	7.26956	1.90429	0.882991	1.21404	1.92015	1.05441	1.52018	0.055077	0.235647	0.229218	0.163532	0.294379	0.398118
5,92333333	4.89542	4.46461	4.46911	7.80255	7.73953	7.26974	1.90292	0.884067	1.2138	1.91964	1.05455	1.52106	0.053728	0.238168	0.230131	0.162786	0.294731	0.407287
5,92666667	4.89512	4.46729	4.47335	7.80486	7.73964	7.27032	1.90275	0.881411	1.21286	1.91778	1.0567	1.52693	0.05496	0.235923	0.230152	0.162425	0.294535	0.398637
5,93	4.89728	4.46866	4.47302	7.80631	7.7426	7.26809	1.90076	0.882622	1.21653	1.91666	1.05452	1.52864	0.057827	0.234168	0.232055	0.162002	0.292723	0.39465
5,93333333	4.89636	4.47007	4.47291	7.80533	7.74015	7.26386	1.90131	0.887548	1.21267	1.91892	1.05756	1.5221	0.056991	0.234928	0.231959	0.161351	0.294454	0.403419
5,93666667	4.89631	4.47002	4.47386	7.80408	7.74736	7.26762	1.90137	0.883727	1.20876	1.92154	1.05735	1.52545	0.05563	0.230972	0.233057	0.16044	0.291502	0.39839
5,94	4.89932	4.47252	4.47252	7.80603	7.74568	7.26924	1.90339	0.887272	1.21163	1.92121	1.05643	1.52147	0.053643	0.226257	0.235018	0.161044	0.292735	0.391045
5,94333333	4.90305	4.47212	4.47714	7.80402	7.74398	7.26214	1.90342	0.885074	1.20962	1.92082	1.05887	1.52054	0.053286	0.225068	0.234279	0.162312	0.291533	0.401489
5,94666667	4.90237	4.47504	4.47566	7.80576	7.74685	7.27352	1.90491	0.878629	1.21638	1.92171	1.05818	1.52256	0.050565	0.226162	0.23281	0.162058	0.29168	0.402268
5,95	4.90413	4.47513	4.47746	7.80651	7.74589	7.27249	1.9037	0.887253	1.21255	1.91996	1.05836	1.52306	0.051596	0.228417	0.231936	0.162089	0.292639	0.393852
5,95333333	4.90454	4.47491	4.48098	7.80879	7.74594	7.2744	1.90367	0.881827	1.21258	1.92051	1.06039	1.52211	0.052677	0.22998	0.229851	0.162763	0.292287	0.400778
5,95666667	4.90642	4.47432	4.48146	7.81032	7.74922	7.26882	1.90236	0.882045	1.21528	1.92024	1.05745	1.52109	0.053618	0.233547	0.228658	0.162799	0.292733	0.406023
5,96	4.90628	4.47304	4.48021	7.81227	7.75268	7.27643	1.90287	0.881844	1.21069	1.92209	1.05405	1.52777	0.055031	0.238492	0.228136	0.162936	0.292641	0.396154
5,96333333	4.9083	4.47796	4.48368	7.81255	7.74691	7.27678	1.90256	0.883935	1.2147	1.92223	1.05775	1.52451	0.056504	0.237657	0.228341	0.160653	0.293881	0.397348
5,96666667	4.91051	4.47501	4.4784	7.81356	7.7486	7.27408	1.90531	0.886563	1.2155	1.92374	1.05709	1.52535	0.05617	0.238606	0.230835	0.160787	0.292098	0.405696
5,97	4.91333	4.47918	4.48282	7.81283	7.74776	7.27808	1.90508	0.883621	1.2156	1.92024	1.05877	1.52713	0.057208	0.238265	0.233534	0.16069	0.290941	0.39907
5,97333333	4.91329	4.48075	4.48804	7.81265	7.75201	7.27632	1.9059	0.88596	1.21557	1.91971	1.05796	1.51771	0.057178	0.23859	0.233116	0.160536	0.292301	0.395887
5,97666667	4.91632	4.48242	4.48536	7.81329	7.74888	7.27327	1.90697	0.88491	1.21626	1.91773	1.0566	1.52274	0.055445	0.235913	0.23403	0.160138	0.290997	0.404967
5,98	4.91765	4.48132	4.48312	7.8134	7.74932	7.27372	1.90927	0.885283	1.21731	1.91825	1.05639	1.52632	0.056714	0.237919	0.233764	0.16168	0.291788	0.400809
5,98333333	4.92087	4.48343	4.4864	7.81336	7.74862	7.27609	1.90835	0.885427	1.21546	1.91825	1.05587	1.51865	0.056601	0.236937	0.230476	0.162903	0.290888	0.393049
5,98666667	4.92255	4.49085	4.48446	7.81614	7.75233	7.28088	1.90726	0.882327	1.21253	1.92089	1.05655	1.52205	0.054423	0.238986	0.228792	0.163952	0.293141	0.401284
5,99	4.92207	4.48546	4.49085	7.81685	7.75549	7.2791	1.90583	0.882642	1.21269	1.92165	1.05509	1.51896	0.055916	0.237715	0.229945	0.163097	0.293013	0.401133
5,99333333	4.92134	4.48849	4.49702	7.81778	7.75357	7.28059	1.90577	0.884331	1.21506	1.92312	1.058	1.5223	0.056532	0.238568	0.229453	0.161931	0.292899	0.391062
5,99666667	4.92114	4.49233	4.49116	7.81876	7.74972	7.28158	1.90451	0.880133	1.21377	1.92043	1.05829	1.52339	0.056406	0.237217	0.232361	0.161866	0.293748	0.39663
6	4.92038	4.48533	4.49143	7.81969	7.74929	7.28682	1.90398	0.882309	1.2119	1.91988	1.05448	1.52546	0.054302	0.236731	0.233611	0.160507	0.292614	0.402813
6,00333333	4.92027	4.48952	4.487	7.81945	7.75904	7.28294	1.90652	0.883735	1.21366	1.91823	1.05454	1.52267	0.054422	0.238306	0.234429	0.160668	0.294533	0.392599
6,00666667	4.92146	4.48649	4.49472	7.81969	7.75675	7.2783	1.90802	0.881688	1.21338	1.91909	1.05168	1.5253	0.052765	0.237024	0.234432	0.160644	0.290848	0.394995
6,01	4.92349	4.49254	4.49249	7.81959	7.75336	7.28655	1.90838	0.886837	1.2149	1.92014	1.05338	1.52352	0.053249	0.236066	0.236159	0.161903	0.294858	0.403517
6,01333333	4.92592	4.49225	4.50053	7.81913	7.75867	7.27952	1.90791	0.88321	1.21141	1.92276	1.05861	1.5239	0.052161	0.234842	0.236089	0.161112	0.293567	0.39724
6,01666667	4.92684	4.49753	4.49545	7.81998	7.75937	7.28384	1.9077	0.887809	1.20985	1.92557	1.0558	1.52124	0.05365	0.235248	0.238117	0.16127	0.295521	0.390769
6,02	4.92742	4.49423	4.49945	7.82009	7.76105	7.29223	1.90825	0.880521	1.21451	1.92452	1.05975	1.52471	0.053682	0.232266	0.238077	0.162278	0.294465	0.400502
6,02333333	4.92958	4.49604	4.50195	7.82125	7.7615	7.29053	1.90774	0.884562	1.20903	1.92238	1.05844	1.52528	0.055807	0.234343	0.236045	0.161716	0.296135	0.396174
6,02666667	4.93016	4.49752	4.50019	7.82342	7.76126	7.28621	1.90757	0.885236	1.21172	1.92112	1.05676	1.52101	0.056252	0.237376	0.234628	0.161152	0.294529	0.388866
6,03	4.92959	4.4998	4.50457	7.82491	7.76068	7.28716	1.90704	0.884172	1.21795	1.92087	1.05607	1.52396	0.055803	0.240078	0.234189	0.160948	0.294276	0.396672
6,03333333	4.93102	4.49939	4.50583	7.82547	7.76051	7.28956	1.90785	0.881762	1.21547	1.91956	1.05347	1.52137	0.05582	0.240437	0.233558	0.160822	0.294892	0.400643
6,03666667	4.93197	4.49812	4.4997	7.8257	7.76231	7.29264	1.90669	0.886653	1.21036	1.92229	1.06081	1.52037	0.055424	0.239408	0.232198	0.159557	0.292099	0.391619
6,04	4.93335	4.50104	4.50677	7.82614	7.76617	7.29312	1.90796	0.879744	1.21249	1.92467	1.0596	1.52017	0.054504	0.239129	0.232474	0.160552	0.295002	0.398104
6,04333333	4.93528	4.49804	4.5085	7.82583	7.75872	7.29289	1.90867	0.885011	1.2106	1.92429	1.05645	1.52059	0.052363	0.237934	0.232742	0.161007	0.292248	0.404332
6,04666667	4.9357	4.49989	4.50549	7.82581	7.76864	7.29262	1.90888	0.880745	1.21263	1.92534	1.05673	1.52146	0.052472	0.238136	0.233118	0.163114	0.295652	0.39405
6,05	4.93691	4.50348	4.50971	7.82632	7.76657	7.29299	1.91065	0.887543	1.2122	1.9246	1.05857	1.52528	0.051478	0.238866	0.233286	0.164821	0.293438	0.39383
6,05333333	4.93804	4.50436	4.51049	7.82814	7.76548	7.29831	1.91089	0.881907	1.218	1.92612	1.05648	1.52112	0.053339	0.241344	0.233472	0.162504	0.296895	0.402864
6,05666667	4.94056	4.50411	4.50798	7.82766	7.76648	7.28967	1.91109	0.882474	1.21454	1.9263	1.05403	1.52066	0.051918	0.242982	0.234035	0.162493	0.294625	0.394617
6,06	4.94082	4.4992	4.51024	7.82807	7.76483	7.2948	1.91033	0.88562	1.21277	1.92742	1.05879	1.52422	0.054155	0.244465	0.233741	0.161724	0.2965	0.38962
6,06333333	4.9433	4.50384	4.51126	7.82934	7.77086	7.30085	1.91266	0.881074	1.21198	1.92557	1.05884	1.52136	0.055207	0.243847	0.233586	0.160898	0.293542	0.401035
6,06666667	4.94253	4.50198	4.51696	7.82965	7.76603	7.29927	1.91222	0.887154	1.2128	1.92718	1.05461	1.52228	0.056554	0.244355	0.232026	0.161258	0.29377	0.398292
6,07	4.94504	4.50382	4.51356	7.82835	7.7649	7.29209	1.9097	0.886534	1.21053	1.92338	1.06111	1.52049	0.056492	0.242349	0.232456	0.162288	0.294834	0.387377
6,07333333	4.94757	4.50891	4.51487	7.82999	7.7754	7.29734	1.90645	0.887349	1.21518	1.92416	1.05548	1.52512	0.056615	0.238568	0.233085	0.162277	0.292132	0.397475
6,07666667	4.94983	4.50894	4.51346	7.82955	7.76656	7.29615	1.90481	0.888256	1.21158	1.92349	1.06016	1.52139	0.05528	0.240706	0.232634	0.162904	0.293242	0.399889
6,08	4.9517	4.5034	4.51654	7.82966	7.77498	7.29131	1.9025	0.88609	1.21118	1.92213	1.05784	1.52126	0.055075	0.240243	0.233206	0.164017	0.292118	0.389412
6,08333333	4.95372	4.51122	4.52005	7.83042	7.77069	7.30003	1.90154	0.878117	1.21184	1.92181	1.05718	1.52048	0.056304	0.238173	0.233992	0.162444	0.293829	0.391698
6,08666667	4.95284	4.51001	4.51967	7.83281	7.76953	7.30377	1.90359	0.886737	1.21039	1.92469	1.05829	1.51901	0.055061	0.236978	0.235757	0.16293	0.29172	0.402571
6,09	4.95177	4.51487	4.51792	7.83291	7.77524	7.30468	1.90685	0.885536	1.2106	1.92283	1.05997	1.5243	0.057082	0.239043	0.235516	0.162334	0.293132	0.393273
6,09333333	4.95167	4.51112	4.5221	7.83428	7.77086	7.29633	1.90876	0.887858	1.2135	1.92371	1.05637	1.52452	0.05681	0.234403	0.235916	0.163779	0.291671	0.390061
6,09666667	4.95147	4.51295	4.5278	7.83559	7.78085	7.30549	1.90982	0.883352	1.21412	1.92687	1.0587	1.52247	0.057461	0.235072	0.2347	0.16187	0.291367	0.400245
6,1	4.95274	4.51834	4.5248	7.83695	7.77428	7.29993	1.90999	0.881971	1.2124	1.92592	1.05736	1.52397	0.056778	0.233425	0.23396	0.162615	0.292182	0.400654
6,10333333	4.95558	4.51989	4.5303	7.83845	7.77226	7.30676	1.91073	0.884958	1.21295	1.92447	1.05743	1.52363	0.058658	0.23617	0.232252	0.161779	0.290275	0.390555
6,10666667	4.95618	4.51729	4.52483	7.83893	7.77638	7.30861	1.90937	0.88377	1.20982	1.92609	1.06302	1.52154	0.057165	0.235833	0.232669	0.161758	0.293542	0.396233
6,11	4.95794	4.52272	4.52726	7.84037	7.77847	7.30521	1.9093	0.883542	1.21504	1.92642	1.05977	1.52309	0.057294	0.235249	0.234203	0.160482	0.291288	0.402252
6,11333333	4.95786	4.51814	4.52785	7.84128	7.77501	7.3043	1.90912	0.883933	1.21241	1.92443	1.05568	1.51981	0.055823	0.234076	0.234018	0.163043	0.294639	0.393148
6,11666667	4.95945	4.52285	4.52869	7.84138	7.77821	7.30426	1.90737	0.889341	1.21425	1.92356	1.05688	1.52351	0.05501	0.23669	0.236024	0.161509	0.291785	0.388225
6,12	4.95901	4.5229	4.52774	7.84144	7.77609	7.30954	1.90679	0.888152	1.2117	1.92417	1.06297	1.52068	0.055826	0.235757	0.237154	0.162681	0.295408	0.398056
6,12333333	4.95912	4.52304	4.53221	7.84179	7.77506	7.31445	1.90716	0.885797	1.21654	1.92495	1.05617	1.52238	0.058208	0.234985	0.236335	0.162696	0.292448	0.397346
6,12666667	4.95882	4.52131	4.53227	7.84043	7.7829	7.3052	1.90762	0.886698	1.21568	1.92411	1.0574	1.52442	0.059817	0.237814	0.235969	0.162646	0.29611	0.389399
6,13	4.96135	4.5258	4.53188	7.84069	7.7783	7.30351	1.90767	0.888333	1.21262	1.9256	1.05391	1.52233	0.058961	0.240845	0.238164	0.161043	0.294041	0.393972
6,13333333	4.96025	4.52635	4.53239	7.84125	7.77805	7.31102	1.90874	0.882376	1.21129	1.92744	1.05598	1.5225	0.059286	0.24028	0.235885	0.161084	0.293947	0.402606
6,13666667	4.96365	4.5229	4.53899	7.84189	7.78147	7.30666	1.9105	0.881005	1.21417	1.92558	1.05991	1.51887	0.058084	0.240363	0.234015	0.161319	0.293487	0.394612
6,14	4.96579	4.52768	4.53354	7.84336	7.78409	7.30807	1.91136	0.882872	1.21184	1.92257	1.05757	1.52363	0.059451	0.24365	0.232949	0.160476	0.29346	0.390088
6,14333333	4.96768	4.5325	4.53993	7.84556	7.78043	7.31025	1.91147	0.88673	1.21214	1.92146	1.05937	1.52085	0.059398	0.241284	0.231659	0.160585	0.294511	0.398683
6,14666667	4.96784	4.52782	4.53813	7.8451	7.7836	7.31397	1.912	0.880353	1.21129	1.92001	1.05964	1.52451	0.063	0.240625	0.230183	0.160188	0.293862	0.398374
6,15	4.97024	4.52935	4.54297	7.84768	7.78644	7.30803	1.91279	0.884431	1.20914	1.91911	1.05594	1.52305	0.062473	0.239066	0.230249	0.160868	0.295536	0.387727
6,15333333	4.9691	4.5284	4.53525	7.84849	7.78242	7.31774	1.9111	0.881086	1.21274	1.92261	1.05725	1.52031	0.062069	0.239992	0.231362	0.159793	0.293725	0.390402
6,15666667	4.97079	4.53092	4.53804	7.84813	7.78348	7.31635	1.91072	0.884932	1.21379	1.92257	1.0551	1.51954	0.061322	0.239359	0.234038	0.159739	0.29344	0.398298
6,16	4.97041	4.53167	4.54245	7.8486	7.78118	7.31884	1.90898	0.883796	1.21329	1.92383	1.05851	1.5194	0.062728	0.240785	0.234169	0.159724	0.293846	0.390843
6,16333333	4.97211	4.53681	4.54073	7.85021	7.78395	7.31468	1.91013	0.884822	1.2112	1.92538	1.05876	1.52121	0.061783	0.238632	0.233876	0.159933	0.292821	0.3861
6,16666667	4.97271	4.53446	4.54192	7.84842	7.78879	7.31271	1.90958	0.887314	1.21207	1.92574	1.0568	1.51997	0.063032	0.23962	0.235501	0.159144	0.294892	0.395047
6,17	4.9737	4.53429	4.54608	7.84868	7.78536	7.32024	1.90974	0.882599	1.21536	1.92527	1.05846	1.52007	0.064448	0.238126	0.236015	0.159963	0.294161	0.399498
6,17333333	4.97182	4.53529	4.54745	7.85093	7.78956	7.31953	1.90998	0.889147	1.21256	1.92571	1.05756	1.52132	0.062749	0.236846	0.234906	0.16019	0.297247	0.38802
6,17666667	4.97511	4.5412	4.54307	7.85246	7.79238	7.31804	1.91272	0.885126	1.21442	1.92653	1.05768	1.52266	0.062537	0.239111	0.234614	0.159792	0.292343	0.39165
6,18	4.97698	4.53556	4.54453	7.8536	7.78995	7.3193	1.91084	0.877977	1.20865	1.92601	1.05751	1.52064	0.062881	0.240023	0.235102	0.159069	0.294162	0.400533
6,18333333	4.97858	4.53729	4.54903	7.85603	7.78835	7.31675	1.91074	0.886301	1.21062	1.92681	1.06002	1.52108	0.064357	0.24057	0.235203	0.160048	0.289953	0.396504
6,18666667	4.98101	4.53913	4.54461	7.85509	7.78865	7.32495	1.91187	0.885371	1.21563	1.9262	1.05555	1.52096	0.064821	0.243855	0.23441	0.158839	0.291001	0.388508
6,19	4.98331	4.54246	4.55071	7.85524	7.79462	7.3172	1.9131	0.882078	1.20975	1.9273	1.05755	1.51973	0.06572	0.243716	0.234149	0.159665	0.290518	0.398665
6,19333333	4.98236	4.53915	4.5536	7.85481	7.79337	7.32428	1.91053	0.887832	1.21026	1.92632	1.05797	1.51817	0.064169	0.242203	0.23541	0.160539	0.291613	0.401902
6,19666667	4.98316	4.54146	4.5498	7.85554	7.78956	7.32275	1.91149	0.883711	1.211	1.92549	1.058	1.51917	0.064066	0.243722	0.235235	0.161816	0.293636	0.393163
6,2	4.98466	4.53777	4.55196	7.85425	7.79513	7.31955	1.91219	0.879441	1.20973	1.92433	1.05532	1.5254	0.064305	0.24433	0.234586	0.162835	0.293929	0.390909
6,20333333	4.98502	4.54532	4.5514	7.85755	7.79523	7.32666	1.91248	0.885472	1.20792	1.92649	1.06109	1.51935	0.063417	0.242235	0.236718	0.16436	0.294956	0.400399
6,20666667	4.98571	4.54875	4.55566	7.85887	7.79998	7.31617	1.91247	0.884343	1.21225	1.9278	1.05731	1.51871	0.063062	0.242834	0.236393	0.164751	0.293416	0.39582
6,21	4.98712	4.54721	4.55513	7.85943	7.79787	7.32411	1.91408	0.881435	1.21044	1.92912	1.05771	1.5219	0.062603	0.239855	0.236702	0.164163	0.294881	0.386145
6,21333333	4.98836	4.54502	4.55174	7.85922	7.79692	7.32393	1.91377	0.885475	1.21319	1.92921	1.05924	1.51399	0.062209	0.240209	0.237647	0.163277	0.294515	0.392677
6,21666667	4.98897	4.54526	4.55254	7.86029	7.80075	7.32813	1.91426	0.884497	1.21462	1.92967	1.05793	1.52219	0.06109	0.240988	0.238803	0.160748	0.294835	0.398463
6,22	4.98987	4.55173	4.55966	7.86005	7.79952	7.32586	1.91338	0.883988	1.21033	1.92562	1.05469	1.52161	0.061189	0.24262	0.237221	0.158819	0.295583	0.388595
6,22333333	4.99271	4.54701	4.55923	7.85945	7.80435	7.32766	1.9121	0.884041	1.20968	1.92444	1.05662	1.52051	0.05784	0.242566	0.237226	0.157453	0.293456	0.389274
6,22666667	4.99503	4.54643	4.55917	7.85974	7.80362	7.32572	1.91098	0.88875	1.2119	1.92466	1.06006	1.51949	0.0634	0.246331	0.236113	0.157759	0.2955	0.398174
6,23	4.99733	4.55153	4.56265	7.85985	7.80231	7.32467	1.91092	0.883612	1.21175	1.92547	1.05721	1.52102	0.060215	0.244835	0.235438	0.157912	0.292175	0.39019
6,23333333	4.99979	4.55468	4.56345	7.86126	7.79959	7.32771	1.91108	0.880462	1.20917	1.9242	1.05926	1.52318	0.05687	0.242994	0.233893	0.160079	0.293683	0.383099
6,23666667	5.00298	4.55167	4.561	7.86214	7.8023	7.3284	1.91157	0.88266	1.2109	1.92624	1.05713	1.51802	0.05841	0.243217	0.233868	0.161119	0.292936	0.392482
6,24	5.00421	4.54992	4.56352	7.86386	7.79521	7.33299	1.91155	0.883615	1.214	1.92554	1.06215	1.52005	0.063301	0.244331	0.234468	0.160961	0.29456	0.394167
6,24333333	5.00532	4.55535	4.56619	7.86532	7.79723	7.3295	1.91261	0.88277	1.21141	1.92136	1.05578	1.52223	0.056851	0.242395	0.236266	0.159077	0.293074	0.386269
6,24666667	5.00481	4.55555	4.56663	7.8679	7.80055	7.33767	1.91295	0.889787	1.21108	1.92256	1.05759	1.5196	0.057627	0.242999	0.235692	0.158866	0.295069	0.388999
6,25	5.00477	4.55511	4.56503	7.86725	7.80201	7.32918	1.914	0.886699	1.21254	1.92328	1.05466	1.51976	0.061131	0.243605	0.237989	0.158509	0.295214	0.397008
6,25333333	5.00395	4.55759	4.56971	7.86702	7.79644	7.33211	1.91387	0.883794	1.21011	1.92101	1.06101	1.5188	0.057312	0.243005	0.238315	0.159332	0.292954	0.392748
6,25666667	5.00381	4.55815	4.57174	7.86518	7.80209	7.33388	1.91456	0.886532	1.21576	1.92014	1.06112	1.51852	0.058399	0.240841	0.238678	0.161497	0.295726	0.384526
6,26	5.00428	4.56074	4.56059	7.86588	7.80158	7.3341	1.91478	0.889987	1.21432	1.92352	1.05941	1.52051	0.058991	0.245115	0.23692	0.162966	0.291775	0.392313
6,26333333	5.00655	4.56024	4.57097	7.86529	7.80576	7.33915	1.91534	0.886943	1.21335	1.92058	1.05591	1.52473	0.059872	0.243994	0.23787	0.164817	0.293521	0.398434
6,26666667	5.00742	4.56284	4.565	7.86685	7.80771	7.33439	1.91404	0.888789	1.21286	1.92108	1.05672	1.51911	0.060181	0.244881	0.235727	0.164731	0.291472	0.390149
6,27	5.00822	4.55984	4.57323	7.86887	7.80484	7.33821	1.9141	0.881706	1.20618	1.92265	1.05858	1.52151	0.063267	0.24505	0.235271	0.163437	0.294248	0.386535
6,27333333	5.01139	4.56074	4.57381	7.87069	7.80444	7.33867	1.91387	0.882776	1.20998	1.92312	1.05941	1.52252	0.062422	0.245546	0.236039	0.162272	0.290917	0.399023
6,27666667	5.01297	4.56223	4.57766	7.87021	7.80524	7.33512	1.91384	0.890975	1.21153	1.92435	1.06469	1.52237	0.063507	0.242225	0.236252	0.161784	0.294404	0.398186
6,28	5.01337	4.56198	4.5736	7.87173	7.807	7.33455	1.91265	0.883336	1.21509	1.92622	1.05667	1.52226	0.064971	0.244034	0.234699	0.160277	0.291905	0.389269
6,28333333	5.01527	4.56703	4.58091	7.87211	7.8064	7.33725	1.9121	0.88422	1.21263	1.92722	1.05871	1.51928	0.06385	0.242119	0.23521	0.160864	0.292896	0.392566
6,28666667	5.01662	4.56356	4.57443	7.87306	7.80786	7.33454	1.91301	0.884531	1.21058	1.92767	1.05612	1.52229	0.064884	0.243123	0.236643	0.16125	0.291363	0.398151
6,29	5.01548	4.56951	4.57587	7.87384	7.8103	7.33952	1.91244	0.882555	1.21398	1.92876	1.06041	1.52546	0.06445	0.243739	0.235604	0.161272	0.291049	0.390218
6,29333333	5.01552	4.56493	4.57794	7.87627	7.81016	7.33393	1.91324	0.883599	1.21105	1.92886	1.05943	1.51832	0.066044	0.243721	0.236444	0.160413	0.29143	0.382735
6,29666667	5.01638	4.56676	4.57656	7.87648	7.81064	7.34137	1.91392	0.887912	1.20666	1.92828	1.06062	1.52062	0.064882	0.240714	0.237434	0.159526	0.291364	0.389685
6,3	5.016	4.57371	4.58075	7.87744	7.81242	7.34243	1.91624	0.885089	1.20961	1.92674	1.05712	1.5185	0.067513	0.24372	0.238369	0.157604	0.293356	0.394041
6,30333333	5.0153	4.56582	4.57979	7.87604	7.81293	7.33998	1.91581	0.887629	1.20918	1.9257	1.05963	1.51735	0.063931	0.242167	0.236959	0.157712	0.2918	0.388159
6,30666667	5.01873	4.57154	4.58579	7.87692	7.81376	7.34386	1.91592	0.883564	1.21027	1.92638	1.05756	1.52057	0.06466	0.242175	0.236364	0.157028	0.294587	0.387844
6,31	5.01983	4.56417	4.58359	7.87743	7.80743	7.34724	1.91558	0.885506	1.20988	1.92506	1.0631	1.52049	0.064523	0.243643	0.237175	0.158686	0.292208	0.396427
6,31333333	5.02068	4.57214	4.57961	7.87849	7.81256	7.34366	1.91638	0.882285	1.21441	1.92664	1.05848	1.51718	0.065921	0.244687	0.237764	0.159799	0.294742	0.39287
6,31666667	5.0212	4.57162	4.58031	7.87848	7.81292	7.3528	1.9145	0.882216	1.20716	1.92703	1.05522	1.52042	0.063865	0.245644	0.23833	0.161042	0.292222	0.384521
6,32	5.02309	4.58362	4.58376	7.88045	7.81588	7.34347	1.91426	0.885391	1.21102	1.92715	1.0587	1.52373	0.064144	0.246399	0.239343	0.160019	0.294169	0.388376
6,32333333	5.02422	4.57379	4.58762	7.88172	7.82332	7.34626	1.91521	0.880726	1.21108	1.92375	1.05955	1.51967	0.063075	0.246949	0.239389	0.161631	0.292897	0.394397
6,32666667	5.02458	4.58025	4.58384	7.88201	7.81697	7.34495	1.91437	0.885117	1.20859	1.92397	1.05933	1.51985	0.06423	0.246854	0.237852	0.162124	0.294039	0.387367
6,33	5.02493	4.57832	4.58789	7.88284	7.81227	7.34353	1.91528	0.884585	1.20986	1.92238	1.05927	1.52024	0.064318	0.24764	0.238314	0.162654	0.293559	0.386094
6,33333333	5.02699	4.57349	4.58161	7.88361	7.81386	7.34765	1.91726	0.880412	1.21369	1.92254	1.05773	1.52038	0.064483	0.244215	0.236703	0.163077	0.293201	0.395422
6,33666667	5.02771	4.57904	4.59098	7.88443	7.81813	7.34695	1.91751	0.885922	1.21115	1.92231	1.06183	1.51684	0.067939	0.243817	0.237745	0.165174	0.294407	0.396031
6,34	5.02859	4.58243	4.591	7.88578	7.81478	7.349	1.9185	0.887568	1.21143	1.92568	1.06224	1.51999	0.06885	0.242583	0.238306	0.163556	0.291921	0.386459
6,34333333	5.0304	4.57941	4.58673	7.88616	7.82015	7.34815	1.92112	0.888223	1.21053	1.92526	1.05798	1.51735	0.068361	0.23968	0.238698	0.163113	0.295377	0.392192
6,34666667	5.03111	4.58213	4.59212	7.88653	7.8225	7.35013	1.92113	0.884384	1.20936	1.92528	1.05948	1.52097	0.07044	0.239962	0.236511	0.162301	0.29122	0.399783
6,35	5.03159	4.58062	4.59196	7.88693	7.82304	7.34625	1.92074	0.887566	1.21169	1.9251	1.05929	1.51697	0.071353	0.239659	0.237591	0.16146	0.294078	0.394309
6,35333333	5.03059	4.58197	4.59286	7.88762	7.82291	7.35665	1.92105	0.886336	1.21415	1.92716	1.06199	1.52049	0.070419	0.238769	0.236556	0.16169	0.291078	0.389235
6,35666667	5.03067	4.58434	4.59564	7.88799	7.82148	7.35289	1.92165	0.881804	1.20828	1.92581	1.05658	1.5169	0.070977	0.236975	0.239759	0.16161	0.294286	0.399371
6,36	5.02888	4.58374	4.59314	7.88909	7.82496	7.35258	1.921	0.885905	1.20898	1.92641	1.06192	1.52529	0.069742	0.238047	0.239747	0.162031	0.289657	0.397803
6,36333333	5.03115	4.58186	4.59297	7.88863	7.82194	7.35267	1.92128	0.882182	1.21286	1.92836	1.0614	1.51974	0.06887	0.236816	0.240094	0.16257	0.29415	0.385791
6,36666667	5.03176	4.58525	4.5994	7.88946	7.81947	7.35658	1.92085	0.884665	1.20784	1.92995	1.06029	1.51808	0.070263	0.236622	0.240522	0.162538	0.290607	0.388418
6,37	5.03319	4.58078	4.5964	7.88958	7.81785	7.35225	1.91951	0.88405	1.20939	1.92902	1.05939	1.51868	0.069212	0.236867	0.239207	0.16201	0.294246	0.395501
6,37333333	5.03269	4.58824	4.59149	7.88984	7.82624	7.35661	1.91588	0.886146	1.20935	1.92974	1.06368	1.52153	0.068191	0.240085	0.236742	0.162305	0.290971	0.387589
6,37666667	5.03544	4.58592	4.59553	7.89063	7.8258	7.35426	1.91294	0.884618	1.20976	1.92915	1.05463	1.5223	0.070301	0.239292	0.237737	0.163086	0.294338	0.38454
6,38	5.03457	4.58552	4.5973	7.8918	7.8313	7.35995	1.91096	0.887006	1.21227	1.92864	1.06035	1.5154	0.070407	0.239624	0.237662	0.16257	0.292431	0.395638
6,38333333	5.03665	4.58886	4.59946	7.89357	7.83177	7.35277	1.90866	0.882775	1.21348	1.92638	1.06542	1.52107	0.069135	0.241714	0.237071	0.164388	0.294259	0.394304
6,38666667	5.04023	4.58879	4.59928	7.89464	7.82832	7.35338	1.90968	0.88383	1.20789	1.92686	1.06186	1.52183	0.070234	0.242516	0.237885	0.163865	0.292783	0.385977
6,39	5.04148	4.58839	4.60421	7.89468	7.82673	7.35712	1.91091	0.883517	1.2082	1.92696	1.05788	1.52294	0.069691	0.242155	0.237123	0.163811	0.294931	0.391282
6,39333333	5.04212	4.5899	4.60292	7.89488	7.82935	7.35703	1.91321	0.887164	1.20724	1.92721	1.06307	1.51991	0.067153	0.244097	0.235927	0.162342	0.292753	0.396147
6,39666667	5.04512	4.59243	4.60619	7.89626	7.82562	7.3561	1.91413	0.884125	1.21393	1.92594	1.06049	1.52076	0.067592	0.244867	0.23601	0.162325	0.292075	0.387978
6,4	5.04617	4.59514	4.60908	7.89661	7.8286	7.36338	1.91615	0.883765	1.21009	1.92699	1.05733	1.52117	0.068036	0.245253	0.236852	0.159772	0.294158	0.383993
6,40333333	5.04682	4.59352	4.60554	7.89709	7.83117	7.35663	1.91688	0.883899	1.20964	1.92564	1.06332	1.51849	0.068353	0.245112	0.23787	0.160227	0.292123	0.393069
6,40666667	5.04791	4.59402	4.60973	7.89787	7.83283	7.3601	1.91928	0.884413	1.21051	1.92491	1.061	1.52	0.067024	0.245079	0.239031	0.159767	0.293608	0.390241
6,41	5.05065	4.60076	4.60906	7.89897	7.83292	7.36686	1.9192	0.884389	1.20636	1.9254	1.06062	1.52059	0.068141	0.245902	0.240588	0.159162	0.292502	0.382761
6,41333333	5.05014	4.59577	4.61157	7.8993	7.83565	7.36812	1.92126	0.884866	1.21112	1.92664	1.0626	1.5163	0.069127	0.246241	0.240976	0.159332	0.29506	0.386664
6,41666667	5.04973	4.59758	4.6073	7.89951	7.82913	7.36482	1.92185	0.884266	1.21309	1.92585	1.06046	1.51874	0.068316	0.246356	0.239995	0.16008	0.290608	0.394554
6,42	5.05123	4.60239	4.60933	7.89951	7.83619	7.36554	1.92336	0.885704	1.20924	1.92829	1.05794	1.5183	0.067493	0.246279	0.24072	0.159995	0.293835	0.389217
6,42333333	5.04971	4.59767	4.60913	7.90121	7.83264	7.36348	1.92345	0.883646	1.2124	1.92916	1.06127	1.51649	0.069455	0.246773	0.240513	0.161443	0.291059	0.385297
6,42666667	5.04894	4.6041	4.61134	7.90089	7.83375	7.36157	1.92436	0.887681	1.21015	1.92827	1.05977	1.51978	0.069909	0.245987	0.238232	0.160104	0.292724	0.394001
6,43	5.04883	4.59703	4.61016	7.90172	7.83748	7.36516	1.92279	0.880829	1.20726	1.92528	1.06376	1.51947	0.067526	0.246749	0.237892	0.160812	0.289494	0.397446
6,43333333	5.04984	4.59759	4.61218	7.90191	7.83181	7.36134	1.92402	0.88826	1.21163	1.92745	1.06101	1.51936	0.067987	0.245709	0.235752	0.16167	0.292949	0.389484
6,43666667	5.04861	4.5975	4.61671	7.90349	7.8354	7.3692	1.92321	0.88324	1.21311	1.92722	1.06214	1.52057	0.067629	0.246402	0.23389	0.160932	0.290966	0.386575
6,44	5.05126	4.6002	4.6158	7.90446	7.84421	7.3741	1.92448	0.885678	1.21175	1.92949	1.05684	1.52079	0.066615	0.247076	0.233397	0.161266	0.291852	0.395199
6,44333333	5.05305	4.60267	4.61674	7.9058	7.83423	7.36511	1.92464	0.885787	1.20716	1.92988	1.05753	1.52076	0.065191	0.246274	0.233657	0.16229	0.292505	0.391664
6,44666667	5.05417	4.60596	4.6162	7.90708	7.83778	7.36577	1.92575	0.886061	1.21124	1.93197	1.05855	1.51559	0.065832	0.243873	0.235664	0.162526	0.293056	0.384323
6,45	5.0564	4.60671	4.61985	7.90843	7.83781	7.37239	1.92436	0.886287	1.21204	1.93113	1.06106	1.51735	0.066664	0.246164	0.238404	0.163313	0.29294	0.386845
6,45333333	5.05941	4.60387	4.61684	7.90787	7.83815	7.36698	1.9232	0.885635	1.21076	1.93164	1.06024	1.52188	0.067668	0.245937	0.239321	0.163826	0.292018	0.393891
6,45666667	5.06215	4.61029	4.61576	7.90819	7.84238	7.37112	1.91969	0.889634	1.20991	1.92979	1.05976	1.51638	0.067497	0.245256	0.238945	0.163905	0.293344	0.389185
6,46	5.06199	4.60663	4.621	7.90801	7.83765	7.36893	1.9193	0.886445	1.20978	1.93009	1.06506	1.51938	0.068389	0.247033	0.238706	0.164287	0.291407	0.385102
6,46333333	5.06273	4.61293	4.61968	7.90792	7.8408	7.37577	1.91842	0.886332	1.20876	1.93029	1.06521	1.51791	0.0677	0.247654	0.23798	0.165316	0.294824	0.388867
6,46666667	5.06394	4.61015	4.61979	7.90879	7.84144	7.3729	1.91867	0.885929	1.20622	1.92999	1.05838	1.51765	0.06554	0.247175	0.238104	0.164825	0.292161	0.392569
6,47	5.06526	4.60861	4.62071	7.90922	7.84387	7.37306	1.91963	0.882311	1.21383	1.92728	1.06066	1.52034	0.065842	0.245145	0.238474	0.164871	0.295806	0.387824
6,47333333	5.06495	4.6054	4.62199	7.90942	7.84606	7.37127	1.92025	0.884914	1.2093	1.92771	1.06226	1.52459	0.069324	0.244105	0.239507	0.163056	0.293911	0.382556
6,47666667	5.06724	4.61112	4.62216	7.91121	7.84485	7.37485	1.92054	0.886686	1.20897	1.92728	1.05962	1.52145	0.06488	0.243362	0.237087	0.163358	0.295818	0.387323
6,48	5.07021	4.61302	4.62495	7.91197	7.84396	7.37743	1.92078	0.883892	1.20961	1.92696	1.06493	1.51759	0.069258	0.244715	0.235727	0.161166	0.29312	0.390323
6,48333333	5.07074	4.61369	4.62642	7.91149	7.84171	7.37271	1.92159	0.88446	1.20931	1.92648	1.05732	1.5143	0.068631	0.243883	0.235039	0.159994	0.295308	0.386235
6,48666667	5.07214	4.6174	4.62183	7.91289	7.84565	7.37647	1.92085	0.886393	1.21087	1.92815	1.06058	1.52002	0.066643	0.245203	0.234349	0.161465	0.292633	0.383741
6,49	5.07399	4.61343	4.62483	7.91378	7.84197	7.37833	1.91972	0.884155	1.21093	1.92839	1.06121	1.51222	0.062693	0.246281	0.23361	0.161209	0.293035	0.392202
6,49333333	5.07584	4.61451	4.62388	7.91526	7.84457	7.37543	1.92065	0.886313	1.20662	1.93077	1.06248	1.51861	0.065551	0.246352	0.237855	0.161475	0.293341	0.392752
6,49666667	5.07649	4.61225	4.62427	7.91618	7.84388	7.37594	1.92108	0.885542	1.21287	1.93036	1.06021	1.51757	0.061741	0.24754	0.240192	0.161083	0.293043	0.387302
6,5	5.07611	4.61735	4.63187	7.91714	7.84854	7.37995	1.92006	0.88476	1.21133	1.92971	1.06008	1.51899	0.061112	0.247295	0.238729	0.164322	0.294454	0.385564
6,50333333	5.07425	4.61659	4.62382	7.91713	7.85044	7.37641	1.92008	0.884315	1.20802	1.92741	1.05772	1.52156	0.062446	0.248569	0.238082	0.163318	0.292318	0.392223
6,50666667	5.07402	4.61402	4.63194	7.91605	7.85134	7.3783	1.92113	0.885071	1.2059	1.92428	1.06227	1.51301	0.063383	0.24743	0.238188	0.165188	0.294335	0.390486
6,51	5.07343	4.61963	4.63467	7.91591	7.85137	7.38645	1.92096	0.885665	1.21066	1.92089	1.05879	1.51422	0.063268	0.246919	0.237002	0.164225	0.291771	0.384993
6,51333333	5.07246	4.61949	4.63444	7.91532	7.84781	7.38554	1.92007	0.884703	1.21446	1.92242	1.05725	1.52121	0.062418	0.246142	0.236994	0.164373	0.294816	0.385316
6,51666667	5.07404	4.61952	4.63284	7.91673	7.84884	7.38801	1.92093	0.885215	1.20611	1.92396	1.06278	1.5219	0.064032	0.245677	0.239223	0.162093	0.290778	0.394082
6,52	5.07382	4.62002	4.63282	7.91816	7.85641	7.38258	1.92076	0.888101	1.20591	1.92744	1.06185	1.51741	0.0643	0.244785	0.24116	0.160655	0.294833	0.39219
6,52333333	5.07548	4.62278	4.63652	7.92102	7.85179	7.38569	1.92176	0.885271	1.20784	1.92901	1.06081	1.51562	0.065139	0.247641	0.239694	0.158921	0.292277	0.386424
6,52666667	5.07535	4.62256	4.63374	7.92102	7.84835	7.3803	1.92036	0.887441	1.20808	1.93154	1.0566	1.52122	0.065189	0.248677	0.241146	0.160039	0.295409	0.389593
6,53	5.07561	4.62109	4.63834	7.92032	7.85281	7.38585	1.92007	0.88435	1.2074	1.93134	1.06574	1.51957	0.063353	0.247192	0.240542	0.159593	0.291928	0.396254
6,53333333	5.07591	4.62442	4.63959	7.91979	7.85207	7.38803	1.92064	0.889474	1.20672	1.93108	1.05628	1.51726	0.064207	0.2485	0.239415	0.159812	0.296066	0.391332
6,53666667	5.07851	4.62274	4.63853	7.91981	7.85747	7.38574	1.92025	0.885717	1.21059	1.92736	1.05805	1.51801	0.063219	0.249773	0.238707	0.160509	0.294168	0.385431
6,54	5.08096	4.62263	4.63578	7.91945	7.85421	7.38494	1.91888	0.883512	1.21063	1.9289	1.0608	1.52062	0.063667	0.247201	0.240065	0.161054	0.295922	0.391125
6,54333333	5.08365	4.62457	4.64105	7.92049	7.85875	7.38834	1.91828	0.88567	1.20637	1.92774	1.06025	1.51937	0.063357	0.245459	0.237467	0.160566	0.29399	0.395275
6,54666667	5.08551	4.62746	4.64077	7.92306	7.85791	7.37939	1.91907	0.881653	1.20766	1.92656	1.06173	1.51871	0.065367	0.244678	0.236551	0.162203	0.294819	0.389489
6,55	5.08732	4.62654	4.64615	7.92417	7.85552	7.38434	1.91705	0.88607	1.21368	1.92796	1.05936	1.51592	0.063706	0.243184	0.238057	0.162527	0.293239	0.383677
6,55333333	5.08861	4.62752	4.64153	7.92604	7.85773	7.38213	1.91806	0.884856	1.20854	1.9336	1.0624	1.52206	0.065562	0.240118	0.2357	0.164269	0.293656	0.389732
6,55666667	5.08852	4.62703	4.63999	7.92721	7.85825	7.38984	1.91979	0.883956	1.21248	1.93298	1.0554	1.52203	0.064928	0.241365	0.236211	0.163904	0.293306	0.392049
6,56	5.08889	4.62941	4.64022	7.92716	7.8581	7.39085	1.92059	0.884897	1.20767	1.93414	1.06043	1.51712	0.06792	0.242082	0.238079	0.162855	0.292127	0.386304
6,56333333	5.08993	4.62586	4.64522	7.92808	7.85988	7.38566	1.92023	0.888133	1.20824	1.93566	1.06003	1.51484	0.066271	0.242854	0.237268	0.161471	0.29411	0.383148
6,56666667	5.09042	4.62971	4.64496	7.9286	7.86315	7.39259	1.92141	0.885526	1.20728	1.9346	1.0605	1.52077	0.067987	0.244569	0.236462	0.161658	0.293281	0.389594
6,57	5.08999	4.63669	4.64578	7.9279	7.85768	7.38935	1.92359	0.886529	1.21075	1.92984	1.06063	1.5206	0.066469	0.246367	0.239111	0.160804	0.294867	0.391797
6,57333333	5.08968	4.63295	4.64415	7.92927	7.85563	7.38794	1.92369	0.887654	1.20929	1.92804	1.06086	1.51464	0.068279	0.246816	0.239617	0.161393	0.292976	0.383173
6,57666667	5.09174	4.63026	4.64652	7.93005	7.85912	7.39702	1.92367	0.887409	1.20967	1.92646	1.06129	1.52024	0.064986	0.248912	0.240706	0.161429	0.295214	0.382651
6,58	5.09358	4.63324	4.64878	7.93026	7.86377	7.39565	1.92394	0.883129	1.20754	1.92679	1.06152	1.51445	0.06595	0.247873	0.244401	0.161339	0.290454	0.391276
6,58333333	5.09291	4.63743	4.64902	7.93063	7.86097	7.3926	1.92515	0.885321	1.20923	1.92444	1.05831	1.51847	0.065501	0.24484	0.243676	0.161859	0.292884	0.390056
6,58666667	5.09392	4.63959	4.64899	7.9321	7.86646	7.39593	1.92408	0.886851	1.2096	1.92757	1.06283	1.51934	0.065682	0.243946	0.244064	0.161735	0.289485	0.382752
6,59	5.09567	4.63559	4.65042	7.93134	7.85468	7.39548	1.92458	0.889656	1.21192	1.93006	1.0631	1.51466	0.066025	0.242415	0.243725	0.161395	0.291824	0.389149
6,59333333	5.09326	4.63709	4.64813	7.93142	7.86399	7.39606	1.92416	0.888999	1.20888	1.9305	1.05695	1.51478	0.069092	0.241442	0.242223	0.163101	0.289771	0.394703
6,59666667	5.09261	4.63637	4.65241	7.93302	7.86743	7.39765	1.92512	0.888047	1.20973	1.93104	1.06311	1.52364	0.070745	0.243234	0.239605	0.164388	0.294472	0.387524
6,6	5.09425	4.63721	4.65271	7.93388	7.86554	7.39753	1.92414	0.888904	1.21056	1.93421	1.06242	1.5189	0.070642	0.243506	0.243284	0.162828	0.291785	0.383458
6,60333333	5.09499	4.63747	4.64757	7.93513	7.86788	7.39743	1.92273	0.887999	1.21019	1.9333	1.06419	1.51411	0.070681	0.241612	0.243007	0.161194	0.29455	0.39053
6,60666667	5.09653	4.64281	4.65427	7.9359	7.86868	7.39726	1.92402	0.885288	1.20716	1.9315	1.06362	1.51945	0.07184	0.240446	0.243181	0.162132	0.292885	0.390438
6,61	5.09963	4.64485	4.6566	7.93653	7.86563	7.39795	1.92552	0.885827	1.21141	1.93296	1.06125	1.52119	0.072303	0.237241	0.24316	0.15997	0.294116	0.382738
6,61333333	5.10077	4.64261	4.6549	7.93659	7.86757	7.39696	1.92382	0.887848	1.20919	1.93107	1.0634	1.52123	0.073038	0.236344	0.243502	0.157912	0.292604	0.38551
6,61666667	5.10304	4.64051	4.65394	7.9365	7.86696	7.3929	1.92386	0.886577	1.2109	1.92798	1.05885	1.51699	0.074498	0.238757	0.240723	0.158355	0.292007	0.394432
6,62	5.10469	4.64504	4.65802	7.93647	7.86632	7.39923	1.92578	0.887853	1.20767	1.92747	1.06256	1.51664	0.073954	0.238809	0.241572	0.161302	0.292305	0.388554
6,62333333	5.10482	4.64371	4.66134	7.93697	7.86631	7.3997	1.92674	0.887078	1.20895	1.9276	1.06716	1.51751	0.073723	0.23969	0.240231	0.158998	0.293248	0.383328
6,62666667	5.10414	4.64571	4.66142	7.93775	7.87071	7.40456	1.92699	0.882636	1.21114	1.92663	1.06644	1.51894	0.068234	0.243119	0.241508	0.160841	0.295079	0.392949
6,63	5.10617	4.64136	4.66199	7.93712	7.87062	7.40345	1.92924	0.888008	1.21018	1.92828	1.06531	1.52068	0.068278	0.243238	0.240481	0.16129	0.29421	0.392397
6,63333333	5.10671	4.64487	4.65811	7.93707	7.87053	7.40108	1.93069	0.890167	1.20973	1.93146	1.06483	1.51398	0.070178	0.242654	0.241776	0.160036	0.298069	0.382874
6,63666667	5.10761	4.64933	4.65913	7.93702	7.8699	7.4039	1.92929	0.883278	1.20834	1.93294	1.06133	1.51272	0.069917	0.244905	0.240898	0.156908	0.293697	0.3852
6,64	5.10804	4.64667	4.66283	7.93807	7.87379	7.40797	1.92953	0.885704	1.21075	1.93232	1.0603	1.51433	0.066975	0.243726	0.243308	0.15831	0.294704	0.393304
6,64333333	5.10973	4.64437	4.66372	7.93861	7.86879	7.4091	1.93079	0.88984	1.20805	1.93123	1.0621	1.50835	0.070934	0.243765	0.243966	0.156923	0.290607	0.385915
6,64666667	5.11008	4.64687	4.66288	7.93922	7.87221	7.40437	1.93023	0.887847	1.20696	1.9304	1.06056	1.51691	0.068994	0.244404	0.245325	0.155933	0.293303	0.381949
6,65	5.10983	4.65298	4.66708	7.94161	7.87184	7.41297	1.92884	0.887072	1.2101	1.9319	1.06165	1.51811	0.065735	0.24286	0.244764	0.156744	0.2898	0.390294
6,65333333	5.1104	4.64856	4.66422	7.9423	7.87425	7.40454	1.93072	0.885943	1.20741	1.93258	1.06152	1.51802	0.066721	0.244366	0.24313	0.158337	0.294772	0.391055
6,65666667	5.11112	4.64936	4.66223	7.94246	7.87852	7.4036	1.93009	0.883935	1.20688	1.93455	1.05848	1.51951	0.067198	0.247494	0.241805	0.158822	0.294456	0.379459
6,66	5.11337	4.64956	4.66749	7.94381	7.87744	7.4079	1.92938	0.885712	1.20996	1.93792	1.05925	1.51463	0.06749	0.243433	0.240595	0.160908	0.296288	0.383437
[truncated: 7,149 more rows]
