# Supplementary material for: Early steps of protein disaggregation by Hsp70 chaperone and class B J-domain proteins are shaped by Hsp110
Source: eLife. 2024 Oct 15;13:RP94795. doi: 10.7554/eLife.94795 (PMC11479587; doi:10.7554/eLife.94795)
Supplement: Figure 1—source data 3. [file elife-94795-fig1-data3.xlsx]

## Sheet: Fig 1C
	DNAJB4, Hsc70			DNAJB4, Hsc70, Hsp105			DNAJA2, Hsc70			DNAJA2, Hsc70, Hsp105
0	0	0	0	0	0	0	0	0	0	0	0	0
0.003333	-0.00096	0.001553	0.00252	-0.00145	0.006032	0.002283	-0.00093	-0.00037	0.006612	0.003915	-0.00691	-0.01258
0.006667	6.79e-05	0.000666	0.003228	-0.00428	0.003744	0.001792	-0.00117	-0.00081	0.007489	0.005417	-0.00759	-0.02028
0.01	-0.00572	-0.0005	0.00504	-0.00801	0.009327	0.001012	-0.00507	-0.00171	0.009168	0.00724	-0.01188	-0.01831
0.013333	-0.00837	-0.0024	0.005948	-0.00879	0.013796	0.002035	0.001618	-0.0022	0.009782	0.006624	-0.00936	-0.02117
0.016667	-0.00697	-0.00296	0.004867	-0.00738	0.016346	0.002093	0.002967	-0.00251	0.008982	0.003709	-0.01307	-0.02098
0.02	-0.00934	-0.00511	0.003764	-0.00093	0.017211	-0.00033	0.000916	-0.00371	0.005894	0.002639	-0.01148	-0.0189
0.023333	-0.00705	-0.00661	0.001674	-0.00179	0.019718	-0.00011	-0.00226	-0.00337	0.005698	0.002293	-0.01131	-0.01778
0.026667	-0.00417	-0.00536	-0.00169	-0.00636	0.0199	0.001437	0.001601	-0.00279	0.005046	0.010871	-0.01273	-0.02295
0.03	-0.0071	-0.00435	-0.00346	-0.00177	0.016798	0.000401	0.003175	-0.00323	0.004781	0.006672	-0.01502	-0.02279
0.033333	-0.00863	-0.00571	-0.00059	-0.00367	0.017623	-0.00082	-0.00266	-0.00479	0.005912	0.010898	-0.01125	-0.02419
0.036667	0.002429	-0.00488	0.005836	0.005159	0.017229	0.000529	-0.00199	-0.00406	0.008035	0.013534	-0.01039	-0.02416
0.04	-0.00259	-0.00358	0.01787	-0.00102	0.016305	6.11e-05	-0.00015	-0.00503	0.007918	0.012022	-0.01225	-0.02682
0.043333	-0.00483	-0.00456	0.033739	-0.00127	0.012455	-0.00024	-0.00185	-0.0075	0.008352	0.011492	-0.01002	-0.0227
0.046667	-0.00801	-0.00527	0.04562	0.002767	0.013687	-0.00167	0.009327	-0.00888	0.008234	0.014948	-0.01151	-0.02357
0.05	-0.00532	-0.0048	0.049786	0.003842	0.012894	-0.0022	-0.00246	-0.00868	0.008382	0.005275	-0.01456	-0.01998
0.053333	-0.00282	-0.00501	0.044341	-0.00521	0.012156	-0.00348	-0.0001	-0.00948	0.007044	0.010641	-0.01647	-0.02275
0.056667	-0.00932	-0.00553	0.031265	-0.00241	0.014482	-0.00324	0.000159	-0.01037	0.007474	0.007945	-0.01595	-0.01891
0.06	-0.00884	-0.00714	0.016428	-0.00576	0.015243	-0.00461	-0.0054	-0.00882	0.007831	0.010455	-0.01624	-0.0208
0.063333	-0.0087	-0.00778	0.008355	-0.00409	0.015665	-0.00391	0.000851	-0.00694	0.007871	0.008619	-0.01652	-0.01795
0.066667	-0.00683	-0.00672	0.010758	-0.00389	0.015156	-0.00311	-0.00163	-0.00802	0.005494	0.013708	-0.01401	-0.02021
0.07	-0.00903	-0.00927	0.023234	-0.00579	0.012952	-0.00185	-0.00012	-0.00699	0.00619	0.01038	-0.01515	-0.01515
0.073333	-0.00651	-0.00985	0.031626	-0.00141	0.008789	-0.00179	-0.00237	-0.00874	0.004959	0.007807	-0.01631	-0.01597
0.076667	-0.00658	-0.01051	0.031402	0.003332	0.00933	-0.00301	9.89e-05	-0.00934	0.00391	0.009622	-0.01546	-0.01736
0.08	-0.00805	-0.00935	0.025361	-0.00523	0.009415	-0.00443	0.000821	-0.01017	0.003598	0.01072	-0.01572	-0.01951
0.083333	-0.00959	-0.01296	0.019563	0.002329	0.007565	-0.00381	-0.00057	-0.01117	0.005289	0.013606	-0.01737	-0.01996
0.086667	-0.00439	-0.01112	0.017557	-0.001	0.010216	-0.00443	-0.00412	-0.01383	0.004258	0.001414	-0.01453	-0.0235
0.09	-0.01026	-0.01203	0.022578	-0.00355	0.012124	-0.00536	-0.00064	-0.0119	0.004914	0.009799	-0.01339	-0.02027
0.093333	-0.00766	-0.01229	0.025784	-0.00729	0.011045	-0.00526	-0.0054	-0.01357	0.00491	0.012509	-0.01336	-0.01867
0.096667	-0.00262	-0.01402	0.02447	-0.00375	0.007573	-0.00357	-0.00046	-0.01382	0.005831	0.008386	-0.01052	-0.01886
0.1	-0.00701	-0.01149	0.02202	-0.00363	0.007286	-0.00501	0.001401	-0.01439	0.00548	0.00917	-0.01099	-0.01764
0.103333	-0.00911	-0.01256	0.021756	0.002088	0.003462	-0.00479	0.001626	-0.01525	0.007077	0.010697	-0.01066	-0.01491
0.106667	-0.00386	-0.0124	0.020371	-0.00206	0.002494	-0.00522	0.004732	-0.01602	0.007391	0.010024	-0.00978	-0.01831
0.11	-0.00606	-0.01233	0.015231	-0.00658	0.002034	-0.00373	-0.00187	-0.0161	0.005998	0.009065	-0.01032	-0.01612
0.113333	-0.01208	-0.01329	0.017089	0.001092	0.004939	-0.00423	0.00199	-0.01704	0.004878	0.015012	-0.01308	-0.01405
0.116667	-0.00581	-0.01458	0.023624	-0.00023	0.006599	-0.00463	-0.00199	-0.01553	0.004429	0.011009	-0.00982	-0.01719
0.12	-0.00312	-0.01471	0.021427	-0.00238	0.008233	-0.00596	-0.00059	-0.01361	0.003493	0.009881	-0.01316	-0.0181
0.123333	-0.00955	-0.01612	0.0095	-0.00065	0.006536	-0.00578	0.001115	-0.01222	0.002955	0.009441	-0.01234	-0.01732
0.126667	-0.00412	-0.01564	0.010274	8.77e-05	0.002247	-0.00793	-0.00341	-0.01176	0.003334	0.013402	-0.01243	-0.01822
0.13	-0.00387	-0.01477	0.022016	-0.00335	-0.0034	-0.00865	-0.0005	-0.01006	0.003688	0.014286	-0.00921	-0.01946
0.133333	-0.00811	-0.01423	0.022868	-0.00326	-0.00971	-0.00897	-3.8e-05	-0.00875	0.002415	0.009667	-0.01003	-0.01801
0.136667	-9.8e-05	-0.01527	0.009894	-0.00349	-0.01347	-0.01009	-0.00222	-0.00856	0.000877	0.01168	-0.00914	-0.01821
0.14	-0.00141	-0.01436	0.01039	-0.00016	-0.01647	-0.01145	-0.00079	-0.00991	-0.00027	0.011755	-0.0111	-0.01899
0.143333	-0.00558	-0.01474	0.02457	-0.00588	-0.01537	-0.01197	-0.00422	-0.0101	-0.00234	0.009212	-0.01001	-0.01951
0.146667	-0.00755	-0.01579	0.019432	-0.00097	-0.01959	-0.0121	-0.00062	-0.01078	-0.0045	0.011215	-0.01208	-0.01925
0.15	-0.00234	-0.01825	0.005431	0.001379	-0.01994	-0.01197	0.004644	-0.01158	-0.0035	0.006557	-0.0152	-0.02224
0.153333	-0.00632	-0.01814	0.012345	0.002736	-0.02177	-0.01089	-0.00025	-0.01351	-0.00241	0.01071	-0.01722	-0.0231
0.156667	-0.00394	-0.0167	0.025383	-0.00496	-0.02199	-0.01129	-0.00241	-0.01491	-0.00205	0.01064	-0.01779	-0.02019
0.16	-0.00635	-0.01764	0.009643	0.000478	-0.02608	-0.00994	-0.00256	-0.01433	0.000825	0.014354	-0.02028	-0.02261
0.163333	-0.00559	-0.01869	0.001443	0.001878	-0.02508	-0.01137	0.004236	-0.01661	0.000197	0.004229	-0.01958	-0.0219
0.166667	-0.00966	-0.0188	0.017068	-0.00092	-0.02788	-0.01158	-0.00075	-0.01641	-0.00104	0.012948	-0.01837	-0.01747
0.17	-0.00348	-0.01846	0.016196	-0.00241	-0.02843	-0.01286	-0.0016	-0.01577	-0.00134	0.012913	-0.01586	-0.01902
0.173333	-0.01009	-0.02075	-0.00185	-0.00481	-0.02692	-0.01127	0.001317	-0.01445	-0.00286	0.01221	-0.01497	-0.0202
0.176667	-0.00131	-0.02062	0.006014	0.003168	-0.02556	-0.01249	-0.00118	-0.01371	-0.00642	0.015931	-0.01654	-0.01629
0.18	-0.0055	-0.0196	0.019387	-0.00119	-0.02302	-0.00957	-0.00121	-0.0134	-0.00565	0.015379	-0.01663	-0.01226
0.183333	-0.00669	-0.01955	0.002472	0.002228	-0.02084	-0.00946	-0.00078	-0.0151	-0.00365	0.011938	-0.01734	-0.01088
0.186667	-0.00889	-0.02029	0.002025	-0.0025	-0.02163	-0.00959	0.003418	-0.01496	-0.00381	0.012493	-0.01975	-0.01092
0.19	-0.00382	-0.02046	0.017685	0.004714	-0.02424	-0.01161	5.9e-05	-0.01563	-0.00226	0.020449	-0.01952	-0.01221
0.193333	-0.00297	-0.02091	0.010217	-0.00163	-0.02466	-0.01068	0.003502	-0.01707	-0.00153	0.014	-0.01858	-0.01287
0.196667	-0.00537	-0.02143	-0.00258	-0.00081	-0.02799	-0.01365	0.000924	-0.01624	-0.00117	0.012884	-0.02148	-0.01662
0.2	-0.00573	-0.02105	0.013837	0.004804	-0.0283	-0.01504	0.001544	-0.01518	-0.00286	0.018405	-0.02092	-0.01991
0.203333	-0.00457	-0.02177	0.010084	-0.00069	-0.02713	-0.01397	0.004282	-0.01569	-0.00433	0.010336	-0.02125	-0.01906
0.206667	-0.00384	-0.02336	-0.00277	-0.00339	-0.0279	-0.01483	-0.00246	-0.01397	-0.00507	0.010908	-0.0201	-0.01819
0.21	-0.00228	-0.0238	0.010402	-0.00035	-0.03002	-0.01662	0.000143	-0.01273	-0.00342	0.010137	-0.01883	-0.01709
0.213333	-0.00454	-0.0235	0.012187	-0.00226	-0.03133	-0.01553	-0.00053	-0.01402	-0.00379	0.01632	-0.01855	-0.01756
0.216667	-0.00795	-0.02439	-0.00226	0.001298	-0.02992	-0.01302	-0.00215	-0.01297	-0.0053	0.013026	-0.01654	-0.01713
0.22	-0.00015	-0.02355	0.009043	0.002137	-0.03293	-0.0144	0.002275	-0.01312	-0.00575	0.015868	-0.01509	-0.01726
0.223333	-0.0033	-0.02522	0.009051	0.002864	-0.03221	-0.01204	-0.00114	-0.01436	-0.00734	0.010793	-0.0178	-0.01913
0.226667	-0.00518	-0.02498	-0.00532	0.002433	-0.03248	-0.01202	0.001304	-0.01658	-0.00894	0.011294	-0.01759	-0.02077
0.23	0.000475	-0.02669	0.006858	0.000542	-0.03087	-0.0125	0.003749	-0.01533	-0.00839	0.01492	-0.01515	-0.01912
0.233333	-0.00482	-0.02619	0.006898	-0.0047	-0.03725	-0.01429	0.002803	-0.0157	-0.0069	0.012137	-0.01791	-0.01891
0.236667	0.002378	-0.02865	-0.00632	-0.00191	-0.03178	-0.01445	0.000956	-0.01573	-0.00573	0.018836	-0.01826	-0.01878
0.24	-0.00689	-0.02723	0.006048	0.001188	-0.03638	-0.01548	0.000878	-0.0158	-0.00468	0.010726	-0.01242	-0.01737
0.243333	-0.00206	-0.02842	0.004312	-0.00025	-0.03508	-0.01559	0.003651	-0.01384	-0.00482	0.017798	-0.01664	-0.02105
0.246667	-0.00622	-0.02758	-0.00872	0.001583	-0.03633	-0.01639	0.001892	-0.0147	-0.00683	0.014284	-0.01507	-0.02258
0.25	-0.0064	-0.02904	0.004155	0.000838	-0.03401	-0.01736	-0.00171	-0.01425	-0.00802	0.016261	-0.01551	-0.02334
0.253333	-0.00613	-0.02731	0.000119	-0.0012	-0.0406	-0.01683	0.005196	-0.01436	-0.00882	0.019238	-0.01729	-0.02387
0.256667	-0.00267	-0.02715	-0.00851	0.00224	-0.03708	-0.01852	0.001826	-0.01421	-0.01016	0.019531	-0.02308	-0.02516
0.26	-0.00101	-0.02646	0.004144	0.00152	-0.03888	-0.01742	0.001703	-0.01569	-0.0105	0.019937	-0.01729	-0.02085
0.263333	-0.00546	-0.02745	-0.00187	-0.00047	-0.03927	-0.01863	0.001712	-0.01409	-0.00946	0.015228	-0.02067	-0.02227
0.266667	-0.00526	-0.02721	-0.00836	-0.00066	-0.04024	-0.0191	-0.00321	-0.01482	-0.01045	0.014239	-0.01867	-0.02157
0.27	-0.00323	-0.02849	0.004455	0.001445	-0.03761	-0.01963	0.003741	-0.01342	-0.00963	0.02341	-0.01654	-0.01912
0.273333	-0.00493	-0.03069	-0.00351	0.005069	-0.04061	-0.02013	-0.00188	-0.01636	-0.00835	0.023309	-0.01688	-0.01962
0.276667	-0.00279	-0.0311	-0.00532	0.004781	-0.04136	-0.02006	0.002014	-0.01505	-0.00729	0.018727	-0.02055	-0.01994
0.28	0.000891	-0.03149	0.003859	0.004438	-0.04183	-0.0181	0.004481	-0.01495	-0.00739	0.016571	-0.02091	-0.01743
0.283333	-0.00078	-0.0321	-0.00602	0.001059	-0.04043	-0.01675	0.002203	-0.01469	-0.00656	0.019885	-0.02293	-0.01815
0.286667	-0.00129	-0.03211	-0.00383	0.006371	-0.04232	-0.0165	-0.00015	-0.01662	-0.00718	0.02069	-0.02434	-0.01946
0.29	-0.00741	-0.03009	-8.5e-05	-6e-05	-0.03913	-0.01421	-0.00234	-0.01513	-0.00744	0.014344	-0.02508	-0.01665
0.293333	-0.00459	-0.0314	-0.01186	0.001393	-0.03627	-0.0155	0.005356	-0.01718	-0.00731	0.015436	-0.02412	-0.01899
0.296667	-0.0054	-0.03111	-0.00514	0.008872	-0.03838	-0.01682	0.004033	-0.01757	-0.00832	0.012658	-0.02185	-0.02044
0.3	-0.0048	-0.0303	-0.00312	0.006462	-0.03866	-0.01759	-0.00095	-0.01872	-0.00918	0.020622	-0.02266	-0.02089
0.303333	-0.00286	-0.03103	-0.01376	0.003845	-0.03919	-0.01756	0.004086	-0.01623	-0.00922	0.021115	-0.0188	-0.02037
0.306667	-0.00773	-0.03257	-0.00339	-0.00021	-0.04173	-0.01763	-0.00095	-0.01588	-0.0096	0.021257	-0.01475	-0.02284
0.31	-0.00304	-0.03344	-0.00456	0.005314	-0.04601	-0.01508	-0.00317	-0.01396	-0.00934	0.020774	-0.01278	-0.02273
0.313333	0.000684	-0.03421	-0.01135	0.003275	-0.04137	-0.01424	-0.00037	-0.01447	-0.00885	0.023408	-0.01483	-0.02338
0.316667	-0.00087	-0.03524	-0.00115	0.004384	-0.04246	-0.01275	0.002654	-0.01515	-0.00923	0.020023	-0.01306	-0.02268
0.32	-0.00106	-0.03513	-0.00652	0.005098	-0.04292	-0.01508	0.006776	-0.01617	-0.00959	0.018266	-0.01438	-0.02268
0.323333	-0.00553	-0.03509	-0.00705	0.000383	-0.04339	-0.01591	0.00421	-0.01545	-0.00961	0.02077	-0.01936	-0.02049
0.326667	0.002163	-0.03369	0.000736	0.006467	-0.04186	-0.01586	0.003125	-0.017	-0.01135	0.018615	-0.0186	-0.02045
0.33	-2.9e-05	-0.0349	-0.00993	0.006999	-0.0437	-0.01469	-0.00034	-0.01626	-0.01234	0.018715	-0.01871	-0.02191
0.333333	-0.00294	-0.03536	-0.00506	0.003095	-0.04385	-0.01835	0.004926	-0.01535	-0.0111	0.018952	-0.01688	-0.02036
0.336667	-0.00315	-0.03596	-0.00349	0.004026	-0.04373	-0.01599	0.002682	-0.01611	-0.01048	0.011698	-0.0183	-0.02216
0.34	-0.00148	-0.03525	-0.01266	0.007529	-0.04252	-0.01598	0.004308	-0.01772	-0.01081	0.021105	-0.01764	-0.02369
0.343333	-0.00101	-0.03637	-0.00659	0.005254	-0.04077	-0.01882	-0.00563	-0.01637	-0.01057	0.019143	-0.02047	-0.02031
0.346667	-0.00245	-0.03562	-0.0084	0.005432	-0.04226	-0.0195	0.002426	-0.01887	-0.01083	0.018505	-0.01977	-0.01606
0.35	0.000211	-0.03609	-0.01703	0.009645	-0.0414	-0.01743	-0.00173	-0.01825	-0.00913	0.023996	-0.0248	-0.01915
0.353333	-0.00225	-0.03566	-0.00943	0.006682	-0.04293	-0.0199	0.005498	-0.0188	-0.01088	0.017989	-0.02368	-0.01888
0.356667	-0.00414	-0.03679	-0.01441	0.004077	-0.04189	-0.02089	0.000491	-0.01774	-0.01104	0.016485	-0.02505	-0.01827
0.36	-0.00113	-0.03686	-0.0156	0.006594	-0.04371	-0.02161	0.00115	-0.01853	-0.01168	0.019512	-0.0242	-0.02023
0.363333	-0.00331	-0.0361	-0.00954	0.004425	-0.04179	-0.02376	0.005001	-0.01709	-0.0098	0.016899	-0.02569	-0.02027
0.366667	-0.00246	-0.03671	-0.01569	0.007404	-0.04378	-0.0245	0.008988	-0.01789	-0.01177	0.014468	-0.02467	-0.01696
0.37	-0.00256	-0.03612	-0.01057	0.009284	-0.04354	-0.02394	0.002677	-0.01778	-0.01139	0.012581	-0.02699	-0.01905
0.373333	0.003093	-0.03667	-0.01305	0.007396	-0.04566	-0.02458	0.004628	-0.01802	-0.01171	0.014115	-0.02634	-0.01972
0.376667	-0.00152	-0.03786	-0.01794	0.010509	-0.04605	-0.02528	0.001332	-0.01728	-0.0107	0.019392	-0.02721	-0.01841
0.38	-0.00257	-0.03963	-0.01152	0.007242	-0.04907	-0.02541	0.007515	-0.02027	-0.01246	0.01804	-0.02469	-0.02135
0.383333	0.001112	-0.03867	-0.01772	0.013085	-0.04665	-0.02742	0.004058	-0.01994	-0.01308	0.020722	-0.02531	-0.02366
0.386667	-0.00451	-0.03947	-0.01893	0.003676	-0.04594	-0.02723	0.001803	-0.0195	-0.01298	0.015754	-0.02228	-0.01853
0.39	0.002567	-0.03885	-0.01312	0.007523	-0.04658	-0.02679	0.002523	-0.02006	-0.01278	0.019278	-0.0203	-0.01614
0.393333	-0.00121	-0.03815	-0.02029	0.004075	-0.04689	-0.0275	-0.00298	-0.0198	-0.01446	0.01742	-0.02047	-0.0152
0.396667	-0.00203	-0.03828	-0.01687	0.002953	-0.04541	-0.02734	0.004524	-0.01772	-0.01358	0.018698	-0.0235	-0.01431
0.4	-0.0023	-0.03805	-0.0145	0.00942	-0.04781	-0.02732	-0.00279	-0.01979	-0.01217	0.015466	-0.02242	-0.01555
0.403333	-0.0025	-0.03819	-0.01977	0.005023	-0.04609	-0.0274	0.000102	-0.02034	-0.01305	0.021309	-0.02311	-0.01613
0.406667	-0.00494	-0.03871	-0.0156	0.004081	-0.04544	-0.02659	0.002567	-0.02036	-0.01392	0.021904	-0.01978	-0.01697
0.41	-0.00325	-0.03849	-0.01684	0.00264	-0.04514	-0.02373	0.004443	-0.02172	-0.0121	0.023987	-0.01912	-0.01927
0.413333	-0.00017	-0.03868	-0.01698	0.009319	-0.04583	-0.02236	0.0066	-0.02174	-0.0131	0.023595	-0.01795	-0.02051
0.416667	-0.00452	-0.04039	-0.01625	0.004671	-0.04244	-0.0191	0.005968	-0.02105	-0.01492	0.017739	-0.01844	-0.02065
0.42	0.002461	-0.04079	-0.01923	0.003909	-0.04572	-0.01706	0.005847	-0.01855	-0.01389	0.025364	-0.01871	-0.0229
0.423333	0.008279	-0.04075	-0.0163	0.007247	-0.04664	-0.01932	0.002098	-0.01888	-0.01387	0.016122	-0.02359	-0.02362
0.426667	-0.00269	-0.04137	-0.01884	0.005408	-0.04917	-0.0196	-0.00035	-0.01836	-0.01448	0.016338	-0.02516	-0.02595
0.43	-0.00148	-0.04162	-0.01925	0.005265	-0.04851	-0.01945	0.001714	-0.01927	-0.0138	0.015816	-0.02498	-0.02511
0.433333	-0.00142	-0.04187	-0.01815	0.006727	-0.05119	-0.01987	0.007795	-0.01802	-0.01298	0.024652	-0.02271	-0.02381
0.436667	-0.00457	-0.04157	-0.02114	0.008315	-0.04957	-0.02225	0.005909	-0.02036	-0.01372	0.019815	-0.02199	-0.02168
0.44	-0.00232	-0.04309	-0.01994	0.005993	-0.0497	-0.02217	0.002005	-0.01863	-0.01364	0.021233	-0.02191	-0.02154
0.443333	0.001279	-0.04338	-0.02191	0.013255	-0.0478	-0.02442	0.003386	-0.02101	-0.01386	0.029166	-0.02106	-0.02038
0.446667	-0.0019	-0.04512	-0.02608	0.008062	-0.04913	-0.02566	0.003042	-0.01851	-0.01392	0.018287	-0.02414	-0.02009
0.45	-0.00177	-0.04479	-0.02334	0.006784	-0.04915	-0.0248	0.004801	-0.01998	-0.0136	0.018598	-0.02438	-0.02097
0.453333	0.001514	-0.046	-0.02538	-0.00023	-0.05001	-0.0239	0.004027	-0.01907	-0.0146	0.016906	-0.02631	-0.02404
0.456667	-0.00065	-0.04575	-0.02509	0.003449	-0.0512	-0.02016	-0.00286	-0.02184	-0.01383	0.016145	-0.02515	-0.02277
0.46	-0.00163	-0.04533	-0.0241	0.003647	-0.04934	-0.01989	-0.00096	-0.01892	-0.01414	0.017804	-0.02375	-0.02188
0.463333	-0.00192	-0.04375	-0.02468	0.009114	-0.05087	-0.02032	0.003147	-0.02026	-0.01559	0.022073	-0.01981	-0.02232
0.466667	0.004232	-0.04438	-0.0229	0.005211	-0.05133	-0.02043	0.002921	-0.01994	-0.01603	0.022589	-0.02288	-0.01958
0.47	0.002612	-0.04465	-0.0251	0.007072	-0.05076	-0.02029	0.003165	-0.02084	-0.01495	0.019864	-0.02417	-0.01728
0.473333	0.001239	-0.04322	-0.02381	0.007832	-0.04949	-0.02037	0.00508	-0.01789	-0.01585	0.020871	-0.02434	-0.01809
0.476667	0.001824	-0.04488	-0.02295	0.007998	-0.05412	-0.02069	0.00188	-0.01956	-0.01647	0.021705	-0.02526	-0.01936
0.48	0.000959	-0.04541	-0.02694	0.011168	-0.05346	-0.02162	0.003946	-0.01878	-0.01501	0.025756	-0.02703	-0.01754
0.483333	0.002147	-0.04542	-0.02292	0.005229	-0.05443	-0.0262	-0.00277	-0.02006	-0.0164	0.025404	-0.02329	-0.0199
0.486667	0.003609	-0.04594	-0.02496	0.006802	-0.05596	-0.03032	-0.00067	-0.01925	-0.0175	0.020144	-0.01771	-0.02025
0.49	0.001031	-0.04775	-0.02661	0.007693	-0.05519	-0.03384	0.003052	-0.02081	-0.0174	0.018323	-0.01787	-0.0227
0.493333	0.001006	-0.04785	-0.02506	0.004765	-0.05418	-0.03453	-0.00053	-0.02045	-0.01712	0.017735	-0.01375	-0.02281
0.496667	-0.00158	-0.04757	-0.02717	0.009619	-0.05574	-0.03689	0.003204	-0.0232	-0.01916	0.024321	-0.00884	-0.02575
0.5	-0.00158	0.027255	0.202698	0.009619	-0.00214	0.166291	0.003204	0.000871	0.069421	0.024321	0.117658	0.038678
0.503333	0.033405	0.024168	0.199776	0.069947	0.003966	0.150447	0.073872	0.015341	0.077924	0.101106	0.123933	0.044949
0.506667	0.039926	0.031546	0.201824	0.077168	0.017333	0.164712	0.115114	0.027554	0.085219	0.155869	0.136994	0.056597
0.51	0.046975	0.027237	0.206283	0.092903	0.01854	0.149092	0.160035	0.037023	0.098973	0.203757	0.139612	0.070794
0.513333	0.045547	0.028561	0.203244	0.093755	0.021155	0.146955	0.177378	0.047351	0.115276	0.252325	0.151031	0.082837
0.516667	0.053443	0.031096	0.203495	0.094654	0.026596	0.144054	0.197552	0.060491	0.126417	0.274668	0.161903	0.095525
0.52	0.052216	0.034587	0.203181	0.099628	0.028383	0.143465	0.21764	0.070447	0.136676	0.308291	0.172992	0.109805
0.523333	0.048898	0.034531	0.203003	0.100143	0.027887	0.140239	0.232144	0.080662	0.143068	0.320941	0.183725	0.122304
0.526667	0.04691	0.0354	0.200638	0.105873	0.029438	0.143136	0.245311	0.090497	0.147493	0.345433	0.193927	0.138025
0.53	0.055381	0.036305	0.199362	0.105546	0.027079	0.145767	0.255061	0.098709	0.150205	0.359039	0.203108	0.151781
0.533333	0.047886	0.036198	0.195733	0.108693	0.026789	0.149084	0.258225	0.10626	0.153316	0.373413	0.212102	0.161313
0.536667	0.051635	0.037436	0.192615	0.108039	0.027567	0.150883	0.277204	0.114205	0.160785	0.391424	0.219879	0.17062
0.54	0.050649	0.039818	0.185335	0.112135	0.026281	0.152312	0.284775	0.119564	0.168793	0.404478	0.22736	0.177871
0.543333	0.055085	0.042276	0.180162	0.113389	0.02159	0.152615	0.29108	0.125473	0.172881	0.420948	0.235511	0.18169
0.546667	0.048389	0.043962	0.18169	0.11155	0.024503	0.152359	0.301845	0.131621	0.17699	0.429035	0.242749	0.185895
0.55	0.050377	0.044198	0.185659	0.116044	0.021681	0.15046	0.309627	0.137796	0.184106	0.445839	0.249015	0.190812
0.553333	0.050125	0.042056	0.18697	0.117675	0.01807	0.151825	0.321679	0.143126	0.188225	0.454335	0.257001	0.195618
0.556667	0.054496	0.03986	0.191968	0.115786	0.01742	0.152095	0.322329	0.15032	0.18808	0.462231	0.263561	0.201828
0.56	0.0573	0.039914	0.19495	0.114803	0.01489	0.1522	0.329758	0.15667	0.192835	0.478352	0.271837	0.210587
0.563333	0.048828	0.039504	0.187767	0.117549	0.011248	0.156205	0.338933	0.163301	0.201206	0.483823	0.281023	0.219082
0.566667	0.053879	0.040606	0.186041	0.120407	0.010467	0.159396	0.347066	0.169332	0.202325	0.495492	0.289754	0.231025
0.57	0.053696	0.039129	0.189219	0.117675	0.010029	0.163429	0.344728	0.174914	0.20151	0.50251	0.298458	0.240179
0.573333	0.050625	0.039207	0.188734	0.120798	0.007986	0.166625	0.350222	0.179275	0.211769	0.507214	0.310228	0.248797
0.576667	0.058503	0.038625	0.189722	0.127239	0.01083	0.172932	0.35762	0.183594	0.216324	0.523266	0.320225	0.256991
0.58	0.054048	0.037845	0.189477	0.129591	0.011315	0.173268	0.358676	0.187917	0.214207	0.530433	0.327204	0.264691
0.583333	0.048967	0.036833	0.189274	0.126542	0.010992	0.174977	0.369869	0.192659	0.221651	0.532756	0.33473	0.270345
0.586667	0.052266	0.037592	0.186604	0.12005	0.01113	0.175225	0.373584	0.198548	0.225627	0.549877	0.339513	0.280763
0.59	0.060442	0.039183	0.187004	0.135993	0.012639	0.173704	0.378346	0.202716	0.225402	0.554941	0.347715	0.290024
0.593333	0.057926	0.038693	0.181999	0.125316	0.011215	0.172992	0.374283	0.207371	0.232183	0.566724	0.356258	0.299065
0.596667	0.054438	0.038829	0.184295	0.124919	0.007849	0.173035	0.383046	0.212725	0.235334	0.567905	0.366645	0.309855
0.6	0.057543	0.039178	0.185786	0.130785	0.006878	0.175384	0.385343	0.217533	0.236606	0.578587	0.375343	0.320724
0.603333	0.054407	0.041464	0.184645	0.126429	0.006225	0.175058	0.394589	0.221456	0.243807	0.586579	0.387816	0.329824
0.606667	0.054732	0.040032	0.181083	0.128621	0.0026	0.179984	0.397982	0.227425	0.244661	0.601774	0.393511	0.342054
0.61	0.058752	0.038193	0.182277	0.129008	0.006202	0.178401	0.399018	0.233232	0.249201	0.605829	0.401004	0.353061
0.613333	0.064608	0.037156	0.18664	0.128566	0.008993	0.177746	0.409726	0.237605	0.255175	0.614642	0.408386	0.362641
0.616667	0.05573	0.036272	0.183824	0.129584	0.012094	0.175849	0.413862	0.243224	0.256148	0.618139	0.41761	0.37431
0.62	0.060659	0.035971	0.179109	0.132263	0.015867	0.175321	0.411087	0.248246	0.260894	0.628444	0.425225	0.386544
0.623333	0.053548	0.036551	0.180018	0.13019	0.01895	0.171402	0.420371	0.253359	0.264688	0.641954	0.437581	0.394298
0.626667	0.056935	0.03827	0.18448	0.138187	0.016911	0.174496	0.424506	0.25759	0.266862	0.653546	0.447242	0.40425
0.63	0.058997	0.037544	0.182464	0.14032	0.017704	0.174623	0.423738	0.262938	0.270315	0.656703	0.4559	0.415387
0.633333	0.060714	0.037377	0.177906	0.13847	0.015937	0.174832	0.43226	0.268266	0.274527	0.66306	0.466908	0.425069
0.636667	0.057183	0.036602	0.184713	0.141361	0.014246	0.175089	0.429548	0.273512	0.278413	0.675463	0.474662	0.432388
0.64	0.059318	0.037184	0.186746	0.137236	0.012932	0.178188	0.439039	0.278624	0.281154	0.681769	0.484156	0.443025
0.643333	0.063386	0.037283	0.183926	0.14083	0.012562	0.174596	0.444268	0.282594	0.286072	0.685228	0.494013	0.450105
0.646667	0.064672	0.038522	0.179315	0.138535	0.01181	0.174326	0.439004	0.288619	0.289735	0.702407	0.507622	0.460414
0.65	0.067737	0.039094	0.185991	0.141207	0.009921	0.173726	0.44468	0.292872	0.294492	0.705313	0.515166	0.46812
0.653333	0.063529	0.03969	0.181884	0.135695	0.008657	0.175144	0.45019	0.298129	0.297309	0.707749	0.526159	0.479725
0.656667	0.064166	0.039196	0.176554	0.140697	0.010381	0.173526	0.449532	0.302753	0.302034	0.722773	0.536896	0.488846
0.66	0.061632	0.037519	0.180157	0.145144	0.010608	0.177516	0.456521	0.307899	0.304675	0.72957	0.545538	0.500555
0.663333	0.061827	0.03748	0.182706	0.146789	0.011573	0.177955	0.458822	0.311323	0.30666	0.737757	0.553363	0.510337
0.666667	0.065147	0.036255	0.175489	0.143669	0.014583	0.177939	0.466839	0.317181	0.312106	0.744509	0.564848	0.520187
0.67	0.064226	0.035491	0.177268	0.147223	0.013833	0.180087	0.463899	0.323488	0.314972	0.758455	0.576023	0.530712
0.673333	0.060775	0.035448	0.180859	0.146961	0.012273	0.17753	0.466105	0.32735	0.321252	0.762652	0.58425	0.541435
0.676667	0.060943	0.035752	0.175015	0.144215	0.011911	0.176802	0.467124	0.333553	0.324515	0.770997	0.595484	0.551742
0.68	0.061775	0.035873	0.175582	0.139227	0.012078	0.177277	0.471646	0.338772	0.328852	0.779831	0.606161	0.562187
0.683333	0.07008	0.037384	0.17791	0.148619	0.010251	0.17964	0.477287	0.342807	0.333435	0.785021	0.615883	0.573296
0.686667	0.064403	0.037624	0.173886	0.145047	0.010008	0.176874	0.480573	0.348476	0.333942	0.795986	0.627237	0.583675
0.69	0.064658	0.036563	0.173816	0.15028	0.01141	0.181962	0.484559	0.354509	0.339971	0.80129	0.638629	0.597814
0.693333	0.067141	0.037462	0.175996	0.15079	0.013186	0.181152	0.487385	0.358348	0.341855	0.811117	0.651134	0.608532
0.696667	0.063584	0.036651	0.173052	0.148571	0.013897	0.182153	0.486556	0.363356	0.348205	0.813935	0.66304	0.619912
0.7	0.063496	0.036525	0.173899	0.15133	0.012085	0.17951	0.493029	0.368776	0.351196	0.835606	0.673112	0.632249
0.703333	0.064417	0.036083	0.174638	0.155947	0.01468	0.181015	0.49578	0.374001	0.356271	0.843284	0.683013	0.642153
0.706667	0.063146	0.036926	0.172195	0.156779	0.013765	0.179217	0.501485	0.378517	0.361722	0.843423	0.691913	0.648971
0.71	0.063247	0.036563	0.170935	0.158402	0.012027	0.180894	0.498966	0.384796	0.362991	0.85291	0.703996	0.659538
0.713333	0.066269	0.038726	0.17203	0.15252	0.010003	0.181727	0.501569	0.389688	0.369248	0.864456	0.71129	0.670365
0.716667	0.07052	0.038698	0.16843	0.152973	0.012247	0.179926	0.504935	0.394993	0.37136	0.866012	0.721678	0.679156
0.72	0.065331	0.036977	0.170021	0.157227	0.011163	0.177532	0.504291	0.400726	0.378677	0.874002	0.735655	0.690272
0.723333	0.070064	0.037661	0.170987	0.155206	0.012339	0.178446	0.505431	0.407213	0.381596	0.894199	0.747773	0.702379
0.726667	0.06897	0.041008	0.169207	0.162123	0.013174	0.171914	0.51186	0.41242	0.386363	0.900289	0.760008	0.714024
0.73	0.070956	0.041048	0.170443	0.16071	0.012509	0.169196	0.512293	0.417751	0.391317	0.910973	0.775044	0.723983
0.733333	0.068935	0.041345	0.171341	0.163001	0.010868	0.172408	0.51985	0.423197	0.39492	0.920592	0.787895	0.735417
0.736667	0.061452	0.042048	0.166862	0.160295	0.012175	0.173599	0.518387	0.429527	0.40194	0.919881	0.79791	0.746017
0.74	0.065491	0.043186	0.170207	0.156908	0.012323	0.174383	0.519669	0.432799	0.403283	0.934487	0.808316	0.7577
0.743333	0.067328	0.042589	0.171461	0.166017	0.011909	0.180727	0.52658	0.439152	0.411515	0.944084	0.818974	0.771076
0.746667	0.063548	0.042362	0.166766	0.160217	0.014907	0.18136	0.530446	0.445138	0.414515	0.946827	0.82831	0.783782
0.75	0.071499	0.043083	0.171982	0.159573	0.021139	0.182941	0.529535	0.450559	0.418587	0.957879	0.839436	0.795856
0.753333	0.06887	0.045112	0.176061	0.16646	0.021157	0.183685	0.530698	0.455207	0.422497	0.968439	0.850465	0.808412
0.756667	0.069993	0.045405	0.169288	0.163461	0.022174	0.182812	0.53696	0.461422	0.426189	0.979474	0.865278	0.821049
0.76	0.070034	0.044727	0.171153	0.169767	0.023914	0.180856	0.531771	0.467006	0.431238	0.985023	0.877294	0.83131
0.763333	0.073258	0.043354	0.173389	0.165648	0.021176	0.183381	0.539874	0.472363	0.435884	0.992786	0.889232	0.844456
0.766667	0.068361	0.042048	0.167421	0.165652	0.017351	0.181638	0.539736	0.478802	0.439914	1.00421	0.899533	0.856551
0.77	0.068916	0.043485	0.16484	0.168157	0.018764	0.180169	0.540069	0.485674	0.445601	1.01253	0.911775	0.868824
0.773333	0.068729	0.040863	0.168035	0.172124	0.016442	0.178683	0.540186	0.491021	0.451523	1.0206	0.92115	0.878603
0.776667	0.068256	0.037954	0.167016	0.17659	0.016943	0.180605	0.543351	0.497049	0.451684	1.02953	0.934252	0.89051
0.78	0.068295	0.037688	0.1689	0.166049	0.020853	0.179999	0.54359	0.501952	0.458536	1.04504	0.944964	0.90247
0.783333	0.07231	0.037322	0.169414	0.168506	0.019223	0.177215	0.558292	0.507401	0.464364	1.04772	0.957306	0.913442
0.786667	0.066456	0.034619	0.172233	0.17002	0.019782	0.18082	0.554737	0.511935	0.464991	1.05762	0.968732	0.924609
0.79	0.06484	0.035445	0.170225	0.170206	0.021379	0.179794	0.559204	0.518827	0.473302	1.06886	0.978767	0.935119
0.793333	0.073221	0.035675	0.165157	0.175658	0.020493	0.179891	0.562367	0.523039	0.48097	1.07594	0.98805	0.949063
0.796667	0.074295	0.037473	0.164849	0.171732	0.016239	0.179957	0.558466	0.528581	0.480447	1.08666	1.00009	0.958734
0.8	0.070012	0.039337	0.165166	0.175442	0.018925	0.186072	0.559143	0.534142	0.489526	1.09454	1.01301	0.971574
0.803333	0.070545	0.038161	0.160646	0.170894	0.016834	0.182673	0.561858	0.541137	0.495996	1.1067	1.0255	0.983759
0.806667	0.073788	0.037181	0.16343	0.176281	0.018569	0.184648	0.568053	0.546275	0.497506	1.11728	1.03927	0.995484
0.81	0.074758	0.039962	0.16393	0.177162	0.01873	0.181574	0.568495	0.552408	0.505024	1.12122	1.053	1.00792
0.813333	0.066777	0.040098	0.162641	0.177187	0.021992	0.180831	0.573892	0.559114	0.508644	1.12885	1.06477	1.02056
0.816667	0.070732	0.039922	0.162629	0.179884	0.020579	0.175771	0.580773	0.564716	0.513448	1.13728	1.07406	1.03466
0.82	0.068515	0.043939	0.161635	0.182403	0.020456	0.175839	0.578124	0.570657	0.519034	1.15016	1.08701	1.04776
0.823333	0.072139	0.045727	0.160995	0.184538	0.018556	0.175857	0.575641	0.576506	0.524482	1.1558	1.09798	1.06002
0.826667	0.076171	0.046102	0.164153	0.18248	0.017444	0.175646	0.579882	0.582823	0.528855	1.17068	1.10829	1.06846
0.83	0.076909	0.042953	0.16483	0.177207	0.016962	0.174963	0.586668	0.588315	0.53421	1.17651	1.12011	1.07874
0.833333	0.075304	0.041188	0.165281	0.185508	0.017066	0.176187	0.581107	0.593884	0.539873	1.1857	1.13479	1.08875
0.836667	0.070922	0.038989	0.165524	0.185277	0.016724	0.174987	0.586276	0.601606	0.544346	1.19646	1.1416	1.09813
0.84	0.070486	0.038029	0.166339	0.184826	0.016521	0.175706	0.587005	0.607518	0.552305	1.20325	1.15384	1.10822
0.843333	0.072721	0.035362	0.164675	0.183662	0.01728	0.177982	0.591185	0.612122	0.552884	1.2149	1.16389	1.1208
0.846667	0.071902	0.037021	0.162223	0.186617	0.01549	0.181114	0.593326	0.619447	0.562572	1.22366	1.17762	1.13119
0.85	0.071721	0.035719	0.163223	0.185739	0.015511	0.182702	0.59956	0.624904	0.562735	1.23526	1.18699	1.1434
0.853333	0.07386	0.03492	0.163176	0.187861	0.018307	0.184759	0.597123	0.630696	0.571082	1.24491	1.20169	1.15453
0.856667	0.077785	0.034348	0.160477	0.188808	0.018451	0.184476	0.602667	0.636316	0.573016	1.25047	1.21395	1.16844
0.86	0.076597	0.036958	0.16179	0.191344	0.018923	0.184354	0.604684	0.642611	0.581863	1.25475	1.22688	1.17914
0.863333	0.07356	0.038747	0.159664	0.18595	0.02205	0.182303	0.601407	0.647932	0.583904	1.2642	1.23775	1.18969
0.866667	0.07873	0.041436	0.157618	0.187742	0.02316	0.18403	0.607375	0.653354	0.591391	1.28222	1.25092	1.20013
0.87	0.075157	0.043666	0.158959	0.191073	0.020425	0.182206	0.61034	0.658868	0.596334	1.2908	1.26178	1.21232
0.873333	0.075431	0.046016	0.157624	0.196694	0.021519	0.181331	0.611315	0.665348	0.601594	1.30088	1.27306	1.22339
0.876667	0.072967	0.045449	0.156828	0.193707	0.024092	0.183134	0.611597	0.672414	0.606	1.30308	1.28452	1.23719
0.88	0.075455	0.043687	0.156881	0.193021	0.023234	0.181223	0.609336	0.677296	0.612731	1.3176	1.29427	1.25111
0.883333	0.078359	0.042396	0.158885	0.191892	0.023582	0.180751	0.615881	0.684488	0.617962	1.32904	1.30471	1.26235
0.886667	0.071051	0.042719	0.158008	0.192533	0.027747	0.182736	0.615097	0.691576	0.621389	1.33355	1.31426	1.27407
0.89	0.079104	0.0397	0.158548	0.192667	0.027877	0.183009	0.621335	0.697667	0.628357	1.34767	1.32555	1.2854
0.893333	0.076654	0.038376	0.157443	0.191012	0.030013	0.181188	0.623043	0.702188	0.630361	1.3578	1.33808	1.29692
0.896667	0.073332	0.03958	0.158417	0.20026	0.032021	0.182121	0.625645	0.708638	0.636226	1.36574	1.34876	1.30642
0.9	0.070074	0.041579	0.157687	0.196597	0.0352	0.18166	0.625364	0.71306	0.639722	1.37535	1.35916	1.31787
0.903333	0.08182	0.039771	0.157265	0.199518	0.037057	0.18338	0.626921	0.719034	0.64825	1.38481	1.37253	1.32767
0.906667	0.078757	0.043705	0.157342	0.196102	0.039557	0.184428	0.633899	0.724294	0.650664	1.39023	1.38347	1.33784
0.91	0.079258	0.045705	0.158815	0.204309	0.038063	0.185969	0.635357	0.729877	0.659913	1.4052	1.39154	1.34649
0.913333	0.078723	0.046676	0.157293	0.202823	0.041219	0.186245	0.639112	0.735731	0.664498	1.4123	1.4049	1.35883
0.916667	0.080006	0.044922	0.157558	0.203614	0.041603	0.187018	0.638203	0.743003	0.672876	1.42469	1.41748	1.37015
0.92	0.079401	0.046554	0.15766	0.197911	0.041268	0.189008	0.642672	0.748982	0.676637	1.43038	1.4283	1.38003
0.923333	0.07726	0.044743	0.155305	0.204097	0.044505	0.187756	0.642499	0.755242	0.683862	1.44665	1.43803	1.38955
0.926667	0.08192	0.042455	0.153612	0.199642	0.047126	0.184948	0.647698	0.761922	0.68768	1.45328	1.45246	1.40065
0.93	0.073646	0.040244	0.154594	0.20165	0.043629	0.186915	0.646955	0.768089	0.693814	1.46307	1.46253	1.41047
0.933333	0.081202	0.039611	0.155122	0.207234	0.042554	0.184746	0.647123	0.774451	0.698123	1.46753	1.47059	1.42132
0.936667	0.076235	0.038618	0.155538	0.205017	0.042503	0.180121	0.651611	0.781654	0.704477	1.47671	1.48433	1.43292
0.94	0.079883	0.037969	0.158749	0.205533	0.038502	0.183259	0.651179	0.787709	0.710471	1.48723	1.49594	1.44446
0.943333	0.074243	0.037959	0.159662	0.204648	0.036486	0.184513	0.659262	0.793224	0.71518	1.49858	1.50383	1.45555
0.946667	0.078293	0.040855	0.158521	0.202988	0.03796	0.181598	0.653374	0.799248	0.722678	1.51093	1.51786	1.46708
0.95	0.077524	0.043048	0.155337	0.210414	0.039709	0.183994	0.657517	0.80431	0.725174	1.52286	1.53041	1.47915
0.953333	0.078501	0.042273	0.155241	0.208977	0.038549	0.184762	0.658006	0.810644	0.733347	1.52644	1.53728	1.48869
0.956667	0.079658	0.043336	0.154325	0.207199	0.040227	0.18605	0.664849	0.816187	0.736172	1.53861	1.54894	1.49948
0.96	0.075518	0.044177	0.153706	0.213579	0.042363	0.187218	0.661963	0.82235	0.745357	1.54024	1.5592	1.512
0.963333	0.080188	0.04043	0.155282	0.209109	0.040378	0.191293	0.6683	0.828486	0.745594	1.55264	1.56752	1.52389
0.966667	0.083059	0.038198	0.156159	0.212491	0.038535	0.192999	0.671097	0.834407	0.755464	1.56053	1.57685	1.53324
0.97	0.084027	0.038654	0.154166	0.210478	0.041612	0.193224	0.673434	0.840432	0.757283	1.57716	1.59112	1.54491
0.973333	0.08016	0.036786	0.156727	0.21382	0.040869	0.189784	0.673481	0.847927	0.768173	1.5832	1.60147	1.55404
0.976667	0.080463	0.036893	0.155383	0.215547	0.040801	0.190366	0.676754	0.854161	0.769427	1.58674	1.61128	1.56129
0.98	0.079602	0.038229	0.154876	0.211174	0.04428	0.190135	0.67802	0.859679	0.778868	1.59678	1.62327	1.57275
0.983333	0.08486	0.04068	0.153442	0.215839	0.047247	0.184257	0.676959	0.865382	0.781112	1.61016	1.63281	1.58093
0.986667	0.0868	0.040886	0.154677	0.211829	0.045753	0.187742	0.676523	0.872534	0.79165	1.6197	1.64181	1.59151
0.99	0.083934	0.041931	0.15287	0.216912	0.048426	0.188256	0.680512	0.87847	0.792843	1.63046	1.65208	1.60034
0.993333	0.084149	0.043642	0.153877	0.218395	0.047232	0.186871	0.686329	0.883532	0.800671	1.6381	1.66328	1.61304
0.996667	0.080738	0.043922	0.155103	0.221357	0.047581	0.186855	0.691979	0.888645	0.806038	1.64775	1.67149	1.61948
1	0.076595	0.041738	0.154136	0.220718	0.047369	0.190003	0.686431	0.895719	0.81039	1.65019	1.68318	1.63281
1.00333	0.079415	0.042792	0.152698	0.220023	0.048189	0.189127	0.682252	0.902851	0.815498	1.66888	1.69433	1.64175
1.00667	0.07919	0.040885	0.153294	0.227749	0.047093	0.190569	0.690816	0.907769	0.819599	1.67228	1.70164	1.65283
1.01	0.080427	0.038431	0.151385	0.22043	0.04952	0.19155	0.689401	0.913941	0.826899	1.68302	1.71172	1.66043
1.01333	0.082574	0.037527	0.151663	0.217125	0.049432	0.190543	0.696389	0.920184	0.829857	1.6913	1.72197	1.67085
1.01667	0.085537	0.040167	0.152654	0.221548	0.049285	0.190438	0.695533	0.925851	0.837728	1.7001	1.73215	1.67874
1.02	0.07713	0.037012	0.153243	0.224301	0.050071	0.192401	0.702154	0.931473	0.842091	1.71062	1.74073	1.68954
1.02333	0.082682	0.040345	0.151677	0.222358	0.052428	0.191026	0.703384	0.938072	0.849774	1.71917	1.75111	1.69776
1.02667	0.081488	0.041434	0.150894	0.223406	0.051061	0.190871	0.704459	0.943898	0.854637	1.72887	1.75845	1.70991
1.03	0.083862	0.040868	0.15246	0.225644	0.052601	0.191281	0.704737	0.950439	0.859882	1.73861	1.76878	1.71917
1.03333	0.080809	0.038845	0.151237	0.224721	0.053536	0.190628	0.710124	0.956847	0.86676	1.74484	1.778	1.72794
1.03667	0.084697	0.042129	0.153686	0.228528	0.052515	0.189932	0.709699	0.962347	0.8708	1.76	1.78618	1.73537
1.04	0.084136	0.041007	0.152244	0.228281	0.053259	0.190109	0.71919	0.968121	0.8781	1.76294	1.7966	1.74752
1.04333	0.085144	0.039736	0.153615	0.227153	0.05612	0.190701	0.71716	0.974861	0.882674	1.77621	1.80896	1.75498
1.04667	0.089423	0.042951	0.152282	0.227258	0.055018	0.19189	0.716455	0.981093	0.888767	1.78828	1.81492	1.76276
1.05	0.08304	0.043269	0.150847	0.229492	0.056215	0.194322	0.72181	0.98661	0.894247	1.79493	1.82524	1.77041
1.05333	0.086829	0.04163	0.150726	0.226608	0.059356	0.192791	0.717243	0.992802	0.899801	1.80644	1.83435	1.78239
1.05667	0.088498	0.04228	0.149298	0.22907	0.058734	0.192906	0.724513	0.998068	0.907027	1.80346	1.84368	1.79069
1.06	0.082161	0.043343	0.149546	0.228858	0.059449	0.193674	0.727984	1.00385	0.911315	1.81995	1.85081	1.80149
1.06333	0.086834	0.040823	0.147299	0.232872	0.060464	0.19528	0.725393	1.01026	0.918578	1.82933	1.86101	1.8125
1.06667	0.086655	0.039229	0.147444	0.238728	0.060078	0.197009	0.726695	1.01653	0.924192	1.83732	1.87011	1.82253
1.07	0.079953	0.040385	0.145756	0.240758	0.058641	0.195652	0.725157	1.02391	0.93071	1.84363	1.87889	1.82892
1.07333	0.087126	0.039774	0.146483	0.23469	0.059306	0.197115	0.73469	1.03018	0.935284	1.85334	1.88568	1.83921
1.07667	0.084116	0.039306	0.146767	0.238596	0.057397	0.196478	0.734766	1.0361	0.939651	1.86686	1.89521	1.84557
1.08	0.091591	0.041575	0.146914	0.234591	0.058679	0.193996	0.740766	1.04069	0.945974	1.8717	1.90363	1.85228
1.08333	0.091466	0.044143	0.1484	0.240665	0.058624	0.192687	0.73838	1.04716	0.950022	1.88366	1.90978	1.85893
1.08667	0.086052	0.042444	0.149332	0.234568	0.059595	0.190955	0.740137	1.05407	0.957626	1.8917	1.91874	1.87
1.09	0.087225	0.043095	0.146232	0.239623	0.057984	0.191181	0.744358	1.05948	0.961854	1.90368	1.92848	1.87806
1.09333	0.087441	0.042872	0.145764	0.237017	0.059033	0.191656	0.747617	1.06662	0.967398	1.90595	1.93972	1.88363
1.09667	0.088941	0.039784	0.145179	0.242357	0.060154	0.190683	0.742022	1.07234	0.974318	1.91571	1.94967	1.89422
1.1	0.089633	0.037834	0.146021	0.244977	0.061045	0.188363	0.739767	1.0783	0.980283	1.92927	1.96036	1.90394
1.10333	0.086254	0.037684	0.144081	0.244397	0.061064	0.191704	0.751646	1.08308	0.986569	1.93877	1.96753	1.91013
1.10667	0.083645	0.03803	0.147704	0.241505	0.062803	0.189522	0.751502	1.08959	0.993581	1.94108	1.97589	1.91884
1.11	0.088925	0.037641	0.146802	0.244169	0.063252	0.189951	0.753239	1.09342	0.999156	1.95755	1.98213	1.93074
1.11333	0.092979	0.040723	0.145249	0.24247	0.0638	0.193907	0.755595	1.10073	1.0038	1.95527	1.98774	1.9404
1.11667	0.081111	0.042523	0.144004	0.24692	0.064778	0.197857	0.752935	1.1046	1.00894	1.9659	1.99703	1.94985
1.12	0.088242	0.044543	0.142861	0.247317	0.065956	0.197254	0.763211	1.11253	1.01394	1.97545	2.00604	1.95895
1.12333	0.084844	0.043779	0.144465	0.245195	0.067492	0.199889	0.763161	1.11825	1.01909	1.98286	2.01299	1.96728
1.12667	0.085377	0.043247	0.144261	0.252048	0.067682	0.200416	0.758937	1.12406	1.02497	1.99968	2.02025	1.97556
1.13	0.089041	0.042933	0.146995	0.245396	0.068712	0.197075	0.762851	1.13002	1.03085	2.00726	2.03139	1.98151
1.13333	0.090941	0.042205	0.148299	0.246319	0.070783	0.193962	0.765006	1.13659	1.03622	2.00822	2.03908	1.98855
1.13667	0.093985	0.040865	0.149504	0.244593	0.070689	0.198356	0.772105	1.14171	1.04215	2.01913	2.04705	1.99584
1.14	0.093325	0.04115	0.149092	0.248267	0.071017	0.19824	0.769785	1.14772	1.04803	2.03057	2.05512	2.00386
1.14333	0.089734	0.043537	0.146829	0.249481	0.071406	0.197571	0.774388	1.15404	1.05221	2.02633	2.06303	2.01095
1.14667	0.084973	0.042342	0.147405	0.248644	0.071628	0.197967	0.775994	1.15822	1.05685	2.04508	2.07152	2.01976
1.15	0.09017	0.040365	0.143782	0.250924	0.070454	0.200378	0.77888	1.16566	1.06455	2.05537	2.07883	2.02926
1.15333	0.09058	0.04075	0.145415	0.252938	0.072607	0.2004	0.774994	1.17354	1.0703	2.05954	2.08751	2.03714
1.15667	0.091062	0.039643	0.143954	0.25772	0.07328	0.201482	0.775359	1.17972	1.07547	2.06947	2.09543	2.04532
1.16	0.087508	0.038116	0.146757	0.247848	0.073985	0.205204	0.780594	1.1864	1.08389	2.08613	2.10365	2.05353
1.16333	0.091208	0.040573	0.14613	0.25254	0.074886	0.209819	0.778986	1.19372	1.08774	2.08719	2.10977	2.0589
1.16667	0.085266	0.044107	0.147057	0.256904	0.076312	0.211957	0.782359	1.1985	1.09253	2.0911	2.1154	2.06544
1.17	0.08693	0.043928	0.14516	0.25591	0.075816	0.213225	0.786788	1.2046	1.09845	2.10562	2.12225	2.07308
1.17333	0.089396	0.044452	0.143136	0.254811	0.077092	0.218078	0.786694	1.20963	1.10177	2.10527	2.12905	2.07973
1.17667	0.087961	0.045827	0.145214	0.25775	0.079811	0.216074	0.79318	1.21575	1.10839	2.1171	2.13611	2.08633
1.18	0.092324	0.043779	0.143851	0.252876	0.078987	0.215808	0.794715	1.22093	1.11256	2.12781	2.14188	2.09591
1.18333	0.09579	0.041464	0.144085	0.259819	0.080004	0.213758	0.796448	1.22597	1.11927	2.13383	2.15228	2.10387
1.18667	0.088808	0.041952	0.143943	0.259037	0.083038	0.208662	0.795372	1.23195	1.12497	2.13859	2.15644	2.10993
1.19	0.093511	0.041464	0.14301	0.265447	0.083109	0.202245	0.796217	1.23806	1.13009	2.14939	2.16357	2.11691
1.19333	0.088176	0.04297	0.140415	0.257733	0.083058	0.201104	0.800161	1.24375	1.1374	2.15358	2.17129	2.12448
1.19667	0.091562	0.043398	0.139853	0.261214	0.08564	0.198862	0.810351	1.24921	1.14112	2.16555	2.18051	2.1288
1.2	0.090372	0.04306	0.141447	0.262857	0.085493	0.198406	0.807748	1.25474	1.14419	2.1769	2.1847	2.13408
1.20333	0.09042	0.04309	0.138631	0.260473	0.084046	0.202605	0.806471	1.25819	1.15255	2.17349	2.19554	2.14085
1.20667	0.091863	0.043198	0.143547	0.262289	0.086719	0.205556	0.805293	1.26504	1.15607	2.18375	2.20431	2.14776
1.21	0.09139	0.039943	0.140398	0.268318	0.088323	0.205695	0.802351	1.2698	1.16003	2.1869	2.2107	2.15541
1.21333	0.090313	0.038743	0.140985	0.267442	0.087592	0.207654	0.810718	1.27567	1.16956	2.20375	2.21478	2.1631
1.21667	0.092593	0.040695	0.139552	0.262361	0.090929	0.208411	0.813468	1.28104	1.17247	2.2142	2.22216	2.17022
1.22	0.088902	0.040635	0.141409	0.269073	0.092222	0.206414	0.816239	1.28729	1.1791	2.21133	2.22603	2.17762
1.22333	0.091788	0.041784	0.13756	0.269797	0.090027	0.204718	0.816558	1.2922	1.18586	2.22756	2.23254	2.18389
1.22667	0.092016	0.043664	0.141371	0.270721	0.089931	0.209415	0.823097	1.29659	1.18892	2.22368	2.23802	2.19136
1.23	0.094033	0.043227	0.141222	0.271781	0.089713	0.209239	0.822563	1.30211	1.19484	2.23601	2.24588	2.19824
1.23333	0.090432	0.041731	0.139503	0.269145	0.088858	0.209348	0.824026	1.30828	1.20083	2.23817	2.252	2.20422
1.23667	0.095924	0.042549	0.139088	0.269069	0.088514	0.209138	0.825734	1.31531	1.20377	2.25752	2.25894	2.21256
1.24	0.085893	0.041886	0.138547	0.270709	0.091133	0.213347	0.821653	1.31953	1.21094	2.26372	2.2636	2.21759
1.24333	0.095106	0.043471	0.138744	0.27154	0.092604	0.207277	0.826958	1.32527	1.21521	2.26428	2.2711	2.22383
1.24667	0.09601	0.044586	0.135217	0.274774	0.095257	0.206107	0.831165	1.33025	1.21875	2.28398	2.27973	2.22927
1.25	0.096513	0.044802	0.137092	0.273974	0.095352	0.209953	0.83388	1.33493	1.2275	2.28181	2.28781	2.23545
1.25333	0.096847	0.043431	0.135316	0.27359	0.096301	0.209739	0.834465	1.33968	1.23152	2.29209	2.29615	2.23964
1.25667	0.097138	0.04293	0.13649	0.275235	0.094088	0.210338	0.833964	1.34572	1.23618	2.29415	2.30404	2.24702
1.26	0.09306	0.039926	0.135716	0.273415	0.093609	0.217316	0.83509	1.35221	1.24413	2.30361	2.30987	2.25151
1.26333	0.094742	0.040728	0.140022	0.276376	0.094081	0.21842	0.831771	1.35724	1.2474	2.31052	2.31326	2.25709
1.26667	0.098481	0.04235	0.139288	0.278403	0.094483	0.219713	0.841503	1.36124	1.25136	2.31957	2.31924	2.26353
1.27	0.094989	0.044478	0.139854	0.279315	0.096783	0.223667	0.843497	1.36829	1.25994	2.31965	2.32409	2.26745
1.27333	0.0973	0.045405	0.14233	0.282076	0.09989	0.222958	0.844786	1.37401	1.26362	2.33403	2.32905	2.2737
1.27667	0.098621	0.045826	0.138803	0.27961	0.099897	0.222493	0.843113	1.37894	1.27013	2.33997	2.3361	2.27835
1.28	0.098938	0.04433	0.13716	0.282316	0.10029	0.220702	0.849285	1.38486	1.27648	2.34588	2.3439	2.28842
1.28333	0.091423	0.043427	0.135976	0.279193	0.102875	0.218473	0.84854	1.39286	1.27979	2.34941	2.3495	2.29398
1.28667	0.096311	0.040516	0.139987	0.283598	0.10045	0.217606	0.855179	1.39838	1.28615	2.35978	2.35443	2.30403
1.29	0.093048	0.04022	0.133718	0.280479	0.100331	0.213737	0.85627	1.40239	1.29195	2.36306	2.3607	2.30845
1.29333	0.100113	0.041953	0.139974	0.283334	0.10216	0.21346	0.851216	1.40736	1.2929	2.37736	2.36689	2.31459
1.29667	0.098725	0.044128	0.137858	0.283618	0.102663	0.217946	0.855019	1.41173	1.30035	2.37844	2.37183	2.31681
1.3	0.100616	0.043057	0.139972	0.281825	0.09983	0.215146	0.857791	1.41582	1.30725	2.38565	2.37768	2.32254
1.30333	0.09814	0.044088	0.135952	0.286379	0.102403	0.215195	0.866029	1.42149	1.30902	2.39103	2.38616	2.32591
1.30667	0.097174	0.043675	0.140439	0.28317	0.101748	0.218299	0.865724	1.42596	1.31642	2.39812	2.39173	2.33141
1.31	0.097562	0.041601	0.135522	0.28656	0.100697	0.215836	0.864435	1.43124	1.32252	2.41402	2.39614	2.33794
1.31333	0.097858	0.043457	0.137303	0.291369	0.100595	0.213593	0.862921	1.43679	1.32297	2.40918	2.40238	2.3429
1.31667	0.097856	0.043833	0.137095	0.288999	0.102871	0.214547	0.872163	1.44118	1.32887	2.41941	2.40542	2.34723
1.32	0.098956	0.044392	0.138506	0.286427	0.102708	0.215133	0.870477	1.44479	1.33485	2.42207	2.41071	2.35235
1.32333	0.09952	0.044752	0.135982	0.287265	0.105874	0.216109	0.874785	1.45057	1.33564	2.43345	2.41755	2.35843
1.32667	0.096283	0.044482	0.135921	0.290457	0.106343	0.220371	0.875187	1.45482	1.3429	2.43911	2.4211	2.36199
1.33	0.094841	0.041328	0.135982	0.290509	0.106415	0.220665	0.879325	1.45857	1.34923	2.44414	2.42574	2.3691
1.33333	0.096124	0.044334	0.131371	0.291817	0.106689	0.222336	0.880603	1.46317	1.35195	2.45172	2.43249	2.37353
1.33667	0.091308	0.044406	0.130567	0.298202	0.10757	0.225189	0.883269	1.47025	1.36159	2.4597	2.4373	2.37984
1.34	0.098476	0.046661	0.129665	0.290839	0.106327	0.227626	0.886244	1.47615	1.36814	2.46634	2.44089	2.38449
1.34333	0.095448	0.048365	0.130454	0.294695	0.108479	0.227226	0.887536	1.48236	1.36958	2.47456	2.449	2.39037
1.34667	0.103643	0.04763	0.129378	0.291908	0.109007	0.230859	0.888377	1.4886	1.37834	2.47601	2.45465	2.39443
1.35	0.100564	0.046197	0.133713	0.303676	0.111103	0.232698	0.891851	1.49397	1.38294	2.48117	2.4595	2.39955
1.35333	0.094047	0.046878	0.133512	0.298471	0.11089	0.231333	0.896158	1.49815	1.3827	2.48231	2.46511	2.4048
1.35667	0.100164	0.044597	0.135748	0.296684	0.111298	0.22967	0.89489	1.50305	1.38979	2.49051	2.46922	2.40931
1.36	0.101916	0.046081	0.135633	0.297753	0.111398	0.230621	0.894061	1.50626	1.3965	2.49842	2.47128	2.41572
1.36333	0.102193	0.047333	0.136606	0.301695	0.111806	0.22975	0.895415	1.5108	1.39602	2.50548	2.4754	2.42018
1.36667	0.100405	0.046111	0.134688	0.30195	0.111327	0.228769	0.895945	1.51607	1.40246	2.51032	2.47987	2.42524
1.37	0.102026	0.044092	0.134781	0.30457	0.112938	0.228816	0.902246	1.52124	1.40993	2.51776	2.4843	2.42828
1.37333	0.102675	0.04324	0.135588	0.297606	0.113646	0.230838	0.906504	1.52556	1.41144	2.52535	2.48885	2.4331
1.37667	0.099537	0.044106	0.133509	0.304255	0.114235	0.228295	0.901173	1.53213	1.41669	2.53209	2.49412	2.43729
1.38	0.100589	0.044502	0.132245	0.306587	0.115902	0.227681	0.908921	1.5363	1.42601	2.53605	2.49967	2.44103
1.38333	0.103856	0.04537	0.130791	0.309594	0.115294	0.229832	0.912193	1.54142	1.42904	2.54251	2.50647	2.44635
1.38667	0.097294	0.046118	0.132023	0.305916	0.117296	0.230064	0.91042	1.54617	1.43494	2.54442	2.50912	2.45035
1.39	0.096946	0.048451	0.128309	0.302156	0.117876	0.229447	0.910211	1.55052	1.44302	2.54992	2.51495	2.45314
1.39333	0.096552	0.044063	0.132324	0.309898	0.118397	0.23148	0.914499	1.55543	1.44582	2.55906	2.51811	2.45595
1.39667	0.096771	0.043821	0.130266	0.309078	0.11855	0.232005	0.915225	1.56091	1.4483	2.5661	2.52289	2.46144
1.4	0.095902	0.045585	0.133333	0.309124	0.12001	0.232362	0.918885	1.5657	1.45741	2.56476	2.52656	2.46554
1.40333	0.098507	0.047176	0.130567	0.307125	0.116349	0.233029	0.917463	1.57175	1.46109	2.57713	2.53054	2.4726
1.40667	0.10391	0.047177	0.134443	0.312182	0.117155	0.234157	0.917587	1.57846	1.46167	2.58	2.53715	2.47741
1.41	0.098044	0.048543	0.131156	0.307287	0.117745	0.236902	0.9188	1.58284	1.46806	2.59117	2.54285	2.48244
1.41333	0.10245	0.047978	0.134828	0.311157	0.118321	0.239166	0.924465	1.58601	1.4739	2.59003	2.54742	2.48776
1.41667	0.09955	0.047239	0.134278	0.307329	0.118439	0.242015	0.923207	1.59043	1.47203	2.60198	2.55247	2.49063
1.42	0.105136	0.048	0.138536	0.312471	0.12239	0.244004	0.925457	1.5958	1.47847	2.59712	2.55735	2.49423
1.42333	0.099834	0.048355	0.137115	0.318202	0.122531	0.244361	0.932041	1.59998	1.48571	2.60862	2.55822	2.49781
1.42667	0.101579	0.049598	0.138707	0.313872	0.12231	0.242921	0.929072	1.60468	1.48807	2.61384	2.56422	2.50242
1.43	0.095802	0.048501	0.138206	0.309863	0.12344	0.242063	0.934128	1.61116	1.49245	2.62182	2.56839	2.50453
1.43333	0.099443	0.047096	0.136127	0.315196	0.125024	0.239894	0.935588	1.61531	1.50197	2.61719	2.57364	2.50972
1.43667	0.100025	0.045733	0.132997	0.313175	0.125489	0.2372	0.941678	1.61912	1.50413	2.63112	2.57644	2.51308
1.44	0.09726	0.0438	0.129136	0.325045	0.126822	0.237853	0.937829	1.62318	1.50804	2.63739	2.58343	2.51735
1.44333	0.103199	0.045675	0.12926	0.312635	0.129501	0.239082	0.935575	1.62612	1.51592	2.63835	2.5873	2.5213
1.44667	0.103598	0.047363	0.12748	0.322442	0.130458	0.238191	0.941804	1.62988	1.51893	2.64839	2.59022	2.52587
1.45	0.100091	0.046869	0.129931	0.325935	0.13014	0.239404	0.947637	1.63515	1.51941	2.6495	2.59325	2.53034
1.45333	0.10162	0.046304	0.127435	0.322942	0.129062	0.243463	0.944914	1.63952	1.52593	2.65997	2.59962	2.53324
1.45667	0.100586	0.046585	0.132576	0.31983	0.129029	0.246788	0.948019	1.64562	1.53213	2.6633	2.60327	2.53864
1.46	0.10284	0.043731	0.129774	0.320704	0.128701	0.246763	0.944018	1.65084	1.5325	2.66685	2.60692	2.54146
1.46333	0.106207	0.044911	0.131856	0.328065	0.129798	0.248493	0.951148	1.65553	1.53747	2.67156	2.61136	2.54453
1.46667	0.105068	0.04506	0.129227	0.323382	0.130168	0.250485	0.956886	1.65959	1.54548	2.67832	2.61395	2.54726
1.47	0.106066	0.045417	0.132087	0.321982	0.13288	0.24954	0.953467	1.66473	1.54852	2.67716	2.61856	2.55222
1.47333	0.110861	0.046867	0.129217	0.326815	0.135919	0.247288	0.958462	1.66994	1.55124	2.68858	2.62301	2.5533
1.47667	0.108166	0.0469	0.131426	0.322525	0.13577	0.251052	0.961968	1.67391	1.55948	2.69017	2.62609	2.55751
1.48	0.104605	0.046725	0.129606	0.32898	0.135752	0.250154	0.96014	1.67874	1.56486	2.70457	2.62992	2.56092
1.48333	0.104797	0.048863	0.133419	0.326599	0.137572	0.248899	0.967205	1.6813	1.5645	2.69853	2.6345	2.56532
1.48667	0.105373	0.049239	0.132148	0.329224	0.137621	0.24885	0.965211	1.68452	1.56988	2.70643	2.63731	2.56736
1.49	0.100453	0.049984	0.133786	0.327945	0.137165	0.251494	0.965324	1.68913	1.57735	2.71149	2.63991	2.57338
1.49333	0.105444	0.049008	0.134258	0.32827	0.141076	0.250807	0.972225	1.69394	1.57753	2.71686	2.64554	2.57743
1.49667	0.109149	0.047657	0.134759	0.333584	0.141725	0.255103	0.963029	1.69882	1.58061	2.72146	2.64739	2.58205
1.5	0.105115	0.047607	0.132329	0.332811	0.142142	0.258001	0.978264	1.70497	1.58967	2.72646	2.65087	2.58556
1.50333	0.101799	0.048848	0.132415	0.331831	0.144652	0.258421	0.972703	1.70892	1.5949	2.72709	2.6546	2.58891
1.50667	0.106943	0.046878	0.129701	0.335485	0.146341	0.258523	0.975533	1.71229	1.59386	2.73437	2.65937	2.59242
1.51	0.105924	0.049393	0.128289	0.331214	0.142883	0.257482	0.981515	1.71652	1.6026	2.73453	2.66141	2.59466
1.51333	0.105237	0.048351	0.127815	0.333948	0.146681	0.254829	0.975947	1.72	1.60923	2.74638	2.668	2.59646
1.51667	0.110172	0.047783	0.127044	0.338294	0.148406	0.254919	0.980807	1.72478	1.60988	2.75255	2.67112	2.59903
1.52	0.103026	0.048137	0.129587	0.336892	0.146961	0.258049	0.983616	1.7292	1.61135	2.75187	2.6749	2.60219
1.52333	0.105266	0.048095	0.129445	0.338028	0.146993	0.257512	0.988599	1.734	1.62072	2.75995	2.67621	2.60311
1.52667	0.101689	0.048407	0.131509	0.339712	0.148906	0.258178	0.98544	1.73759	1.62211	2.75902	2.68111	2.60729
1.53	0.108649	0.050927	0.128715	0.340486	0.146523	0.260593	0.990008	1.74105	1.62168	2.7653	2.68322	2.61103
1.53333	0.111311	0.049189	0.129578	0.342595	0.145925	0.26065	0.989789	1.7443	1.62764	2.765	2.68929	2.61414
1.53667	0.107786	0.048888	0.125279	0.338405	0.147091	0.258887	0.991925	1.7481	1.6353	2.774	2.69201	2.6181
1.54	0.106212	0.048333	0.126936	0.338594	0.146337	0.261214	0.994249	1.75228	1.63605	2.77893	2.69664	2.62298
1.54333	0.106061	0.048011	0.123868	0.344114	0.147317	0.261758	1.00172	1.75717	1.63962	2.77945	2.69887	2.62624
1.54667	0.100868	0.048817	0.128977	0.346357	0.149744	0.260062	0.993034	1.76289	1.64833	2.78429	2.70506	2.63085
1.55	0.107548	0.049147	0.128501	0.341606	0.150098	0.260735	0.998345	1.76787	1.6522	2.79932	2.70504	2.63485
1.55333	0.106392	0.048143	0.133137	0.343686	0.151472	0.261671	1.00024	1.77316	1.6518	2.79597	2.70911	2.63936
1.55667	0.110013	0.049286	0.132592	0.351709	0.155331	0.258384	1.00392	1.77822	1.65767	2.80118	2.71212	2.64294
1.56	0.106811	0.048564	0.135476	0.346152	0.153609	0.256512	1.00727	1.78203	1.6643	2.80512	2.71697	2.64636
1.56333	0.109468	0.047179	0.132138	0.349729	0.15287	0.25849	1.00689	1.78418	1.66327	2.80817	2.71654	2.65041
1.56667	0.105914	0.048795	0.132218	0.345702	0.154543	0.256859	1.01021	1.78708	1.66631	2.81096	2.72307	2.65327
1.57	0.10613	0.04677	0.129359	0.345241	0.154018	0.256726	1.01118	1.79022	1.67667	2.8134	2.72576	2.65433
1.57333	0.111351	0.047665	0.130187	0.34858	0.152428	0.258384	1.01096	1.79421	1.68066	2.8199	2.72871	2.65789
1.57667	0.107895	0.04784	0.127896	0.352392	0.15611	0.263646	1.01348	1.79836	1.68041	2.82841	2.72977	2.66326
1.58	0.109531	0.047142	0.129632	0.352233	0.156119	0.266715	1.01588	1.80338	1.68865	2.82871	2.73532	2.66363
1.58333	0.112246	0.048498	0.130673	0.351404	0.154958	0.268472	1.01849	1.808	1.69491	2.83104	2.73902	2.66677
1.58667	0.107337	0.049373	0.130342	0.35522	0.155015	0.273654	1.01944	1.81229	1.69409	2.83565	2.74222	2.67015
1.59	0.105771	0.049871	0.131768	0.355789	0.15498	0.275513	1.02224	1.81582	1.69701	2.84123	2.74578	2.6711
1.59333	0.100804	0.049006	0.132764	0.356796	0.155962	0.273732	1.02579	1.82009	1.70507	2.846	2.75016	2.67067
1.59667	0.105557	0.049356	0.13355	0.349786	0.157632	0.273763	1.02181	1.82308	1.7088	2.84332	2.75136	2.67589
1.6	0.110402	0.048457	0.130718	0.35564	0.160202	0.272839	1.02746	1.82731	1.71	2.84849	2.75341	2.6782
1.60333	0.108885	0.04937	0.131611	0.358934	0.160408	0.269833	1.02681	1.83035	1.71453	2.85565	2.75739	2.68085
1.60667	0.10413	0.049637	0.128444	0.365631	0.16061	0.27176	1.02924	1.83594	1.72149	2.86407	2.75848	2.6841
1.61	0.109665	0.048471	0.127945	0.358478	0.160077	0.271795	1.03406	1.83926	1.72369	2.86482	2.76077	2.68653
1.61333	0.11599	0.049174	0.125397	0.362837	0.160098	0.273759	1.03043	1.84356	1.72474	2.86337	2.76554	2.68777
1.61667	0.108311	0.049586	0.129441	0.364529	0.161156	0.276732	1.03631	1.8472	1.73074	2.86503	2.76739	2.6909
1.62	0.11265	0.050335	0.127352	0.357245	0.161515	0.272044	1.03623	1.85097	1.73616	2.87516	2.76928	2.69557
1.62333	0.110597	0.049124	0.131091	0.36083	0.162803	0.266896	1.03875	1.85386	1.73748	2.87468	2.77541	2.69732
1.62667	0.109706	0.050596	0.128976	0.361316	0.163945	0.266395	1.0424	1.85744	1.7409	2.88529	2.77715	2.70026
1.63	0.112728	0.050331	0.131427	0.36557	0.16681	0.262731	1.04163	1.86185	1.74782	2.88052	2.77768	2.704
1.63333	0.110137	0.051588	0.12627	0.367307	0.166857	0.26036	1.04603	1.8662	1.75046	2.89258	2.78118	2.708
1.63667	0.110565	0.052661	0.128139	0.36371	0.169137	0.264346	1.04064	1.87078	1.75184	2.88945	2.7842	2.71068
1.64	0.109895	0.052321	0.123557	0.365231	0.169993	0.265166	1.04778	1.87562	1.75669	2.89856	2.78536	2.71289
1.64333	0.113607	0.054141	0.126198	0.371756	0.17159	0.267053	1.06038	1.87977	1.76223	2.89805	2.78932	2.71654
1.64667	0.113313	0.053783	0.123813	0.37155	0.170843	0.268448	1.05216	1.8837	1.76315	2.89828	2.79338	2.71784
1.65	0.11264	0.050776	0.129133	0.370631	0.17122	0.270805	1.05131	1.88626	1.76477	2.90651	2.79594	2.71833
1.65333	0.110062	0.050442	0.127764	0.370005	0.17357	0.271012	1.05999	1.88893	1.76943	2.90926	2.80021	2.71886
1.65667	0.114057	0.050326	0.131342	0.37233	0.174584	0.274317	1.05753	1.89274	1.77468	2.91094	2.80084	2.72271
1.66	0.119483	0.050051	0.127951	0.376617	0.173902	0.275209	1.05897	1.89562	1.77557	2.91827	2.80328	2.72427
1.66333	0.110276	0.051016	0.130441	0.371167	0.175186	0.276949	1.06381	1.89847	1.77779	2.92176	2.80642	2.72918
1.66667	0.107319	0.051001	0.125408	0.374143	0.175345	0.277849	1.06663	1.9012	1.78525	2.9223	2.80939	2.72943
1.67	0.111034	0.049969	0.126301	0.375367	0.175139	0.28065	1.05973	1.90575	1.78905	2.92828	2.81181	2.73362
1.67333	0.112832	0.050506	0.123176	0.371858	0.176637	0.280413	1.06705	1.90858	1.78975	2.92489	2.81592	2.73425
1.67667	0.11124	0.051436	0.126311	0.37521	0.177911	0.279611	1.06738	1.9115	1.79393	2.93781	2.81942	2.73709
1.68	0.111794	0.050759	0.123119	0.376849	0.176748	0.279684	1.06846	1.91344	1.80166	2.93351	2.81938	2.73936
1.68333	0.10795	0.050545	0.128599	0.377115	0.179085	0.279514	1.06932	1.91796	1.80369	2.94796	2.82095	2.74479
1.68667	0.111968	0.050774	0.126327	0.379449	0.179134	0.277905	1.07327	1.92128	1.80539	2.94285	2.82092	2.74543
1.69	0.115521	0.050077	0.127881	0.378688	0.179504	0.280991	1.07603	1.92528	1.81137	2.94366	2.82507	2.75111
1.69333	0.109552	0.050243	0.126634	0.37968	0.179925	0.281456	1.0779	1.92943	1.81666	2.94195	2.82526	2.75205
1.69667	0.113703	0.052004	0.131112	0.378987	0.182423	0.280002	1.08113	1.93431	1.81855	2.95187	2.82832	2.75196
1.7	0.115664	0.051987	0.125871	0.38579	0.18175	0.280799	1.08138	1.93791	1.81949	2.95806	2.83217	2.7556
1.70333	0.116359	0.052206	0.127904	0.382839	0.181316	0.280012	1.08454	1.94176	1.82406	2.96378	2.83597	2.7574
1.70667	0.113401	0.051563	0.125465	0.373904	0.181694	0.277363	1.08283	1.94502	1.82885	2.96543	2.83658	2.75924
1.71	0.114575	0.050383	0.126881	0.385348	0.181996	0.280397	1.08417	1.94907	1.83115	2.96666	2.84202	2.76427
1.71333	0.113977	0.050062	0.123327	0.386636	0.181849	0.282771	1.08731	1.95166	1.83183	2.96589	2.84279	2.76822
1.71667	0.119639	0.048992	0.12812	0.382885	0.182193	0.284198	1.08984	1.95473	1.83883	2.97555	2.84665	2.7698
1.72	0.11104	0.049164	0.128694	0.390498	0.183528	0.286986	1.09329	1.95686	1.84434	2.97379	2.84907	2.77315
1.72333	0.115172	0.051088	0.131456	0.380991	0.184022	0.290909	1.09457	1.96099	1.8445	2.97035	2.85176	2.77438
1.72667	0.116523	0.050921	0.131272	0.387997	0.184396	0.288795	1.09672	1.9638	1.84628	2.98195	2.85242	2.77539
1.73	0.117498	0.050813	0.132974	0.391826	0.185263	0.289731	1.09831	1.96862	1.85306	2.98643	2.85766	2.77752
1.73333	0.112576	0.052393	0.129187	0.398867	0.187321	0.293066	1.10312	1.97132	1.85507	2.98452	2.85912	2.77944
1.73667	0.10956	0.050733	0.128741	0.397232	0.19038	0.295949	1.09948	1.97419	1.85548	2.9867	2.86057	2.78034
1.74	0.114571	0.049592	0.129184	0.393792	0.191738	0.296457	1.10742	1.97719	1.86025	2.98781	2.86232	2.78182
1.74333	0.118795	0.048376	0.12863	0.397557	0.192907	0.303096	1.10496	1.98057	1.86602	2.99356	2.86437	2.78491
1.74667	0.115345	0.049322	0.12747	0.395246	0.192691	0.305989	1.10672	1.98301	1.86842	2.99834	2.86609	2.78748
1.75	0.11696	0.050614	0.129059	0.397564	0.195313	0.304469	1.10856	1.98682	1.86906	2.99879	2.86762	2.7868
1.75333	0.117519	0.05091	0.131998	0.399263	0.194587	0.30516	1.10284	1.99108	1.87317	2.9977	2.86839	2.79125
1.75667	0.113971	0.0523	0.13031	0.393386	0.194803	0.3091	1.11668	1.99503	1.87805	2.99959	2.87187	2.79501
1.76	0.115723	0.053831	0.131503	0.401402	0.195786	0.306733	1.11391	1.9975	1.87901	3.00791	2.87441	2.79544
1.76333	0.117331	0.052584	0.131546	0.398557	0.197676	0.309315	1.11602	2.00036	1.87897	3.00727	2.87635	2.79741
1.76667	0.115447	0.052558	0.132934	0.396054	0.195028	0.31298	1.11255	2.00309	1.88531	3.00892	2.87733	2.80234
1.77	0.114736	0.051602	0.130095	0.40064	0.196623	0.316045	1.1191	2.00615	1.89014	3.01831	2.88187	2.8006
1.77333	0.118669	0.050005	0.132951	0.400397	0.198348	0.310963	1.11583	2.00894	1.89081	3.01706	2.88301	2.80285
1.77667	0.117936	0.049606	0.131108	0.397976	0.198884	0.311627	1.12135	2.01257	1.89253	3.024	2.8868	2.8055
1.78	0.115534	0.050996	0.130811	0.400561	0.199985	0.308578	1.12547	2.01564	1.89864	3.02307	2.89033	2.80675
1.78333	0.1154	0.051236	0.12738	0.402025	0.20261	0.307381	1.12379	2.01822	1.90176	3.02381	2.8934	2.80655
1.78667	0.120752	0.053377	0.130031	0.407563	0.201835	0.305157	1.13307	2.02176	1.90315	3.02411	2.89485	2.81017
1.79	0.114028	0.055099	0.125526	0.402652	0.202496	0.307214	1.13177	2.02553	1.90648	3.03487	2.89809	2.81087
1.79333	0.120581	0.054183	0.127337	0.408132	0.203058	0.306954	1.13102	2.02866	1.91263	3.03117	2.89678	2.81081
1.79667	0.115886	0.054493	0.126979	0.408865	0.202129	0.310255	1.13659	2.03275	1.91787	3.03038	2.89967	2.81327
1.8	0.117577	0.054321	0.130251	0.410397	0.202231	0.309669	1.13364	2.03512	1.91863	3.0401	2.90342	2.81517
1.80333	0.118309	0.053388	0.12745	0.408414	0.203275	0.306581	1.13609	2.0386	1.91996	3.03872	2.90639	2.81596
1.80667	0.115182	0.053731	0.133132	0.410801	0.201038	0.306139	1.13847	2.04138	1.92585	3.03999	2.90768	2.81653
1.81	0.117982	0.054806	0.129596	0.406162	0.202803	0.307053	1.14243	2.04528	1.92986	3.04516	2.91231	2.82034
1.81333	0.123433	0.053963	0.129949	0.4114	0.204177	0.30459	1.13776	2.04714	1.92915	3.04466	2.91167	2.82145
1.81667	0.121278	0.054054	0.127988	0.407653	0.204389	0.304103	1.144	2.05256	1.93134	3.05036	2.91169	2.82338
1.82	0.115749	0.054927	0.129404	0.407232	0.204895	0.307861	1.1469	2.05453	1.93687	3.04772	2.91191	2.82508
1.82333	0.120687	0.054412	0.125313	0.408026	0.2082	0.30812	1.14762	2.05822	1.94046	3.05603	2.91194	2.82759
1.82667	0.11596	0.053674	0.127881	0.415817	0.207299	0.308393	1.14757	2.05932	1.94074	3.0587	2.91191	2.82959
1.83	0.129796	0.053687	0.12996	0.412937	0.206746	0.308505	1.14891	2.06293	1.94394	3.06263	2.91448	2.83064
1.83333	0.124618	0.053557	0.130832	0.408854	0.208654	0.308249	1.15516	2.06336	1.94946	3.06167	2.9155	2.83261
1.83667	0.113664	0.054608	0.130585	0.416984	0.210621	0.308225	1.15544	2.06599	1.95317	3.06924	2.91895	2.83542
1.84	0.117505	0.054842	0.13235	0.4128	0.208344	0.30898	1.16303	2.06879	1.95376	3.07145	2.92221	2.83617
1.84333	0.121693	0.054615	0.133935	0.418686	0.212003	0.30941	1.15864	2.0727	1.9552	3.07515	2.92665	2.83711
1.84667	0.120779	0.055214	0.131563	0.41557	0.212251	0.311814	1.15865	2.07549	1.96109	3.07789	2.92644	2.84009
1.85	0.124357	0.055271	0.131279	0.418191	0.210996	0.312751	1.1577	2.07918	1.96469	3.07826	2.9308	2.84197
1.85333	0.124126	0.054198	0.13021	0.413042	0.210793	0.315555	1.16404	2.08171	1.96423	3.07806	2.9299	2.84343
1.85667	0.124887	0.053663	0.128183	0.420478	0.214252	0.317095	1.16246	2.0841	1.96726	3.07564	2.93324	2.84566
1.86	0.120098	0.055368	0.126142	0.417501	0.210039	0.318241	1.16173	2.08705	1.97377	3.08152	2.93393	2.84665
1.86333	0.120363	0.054838	0.127261	0.426893	0.213303	0.318224	1.16935	2.08957	1.97566	3.08082	2.93862	2.84747
1.86667	0.124383	0.054261	0.126543	0.417631	0.212046	0.319731	1.17098	2.09285	1.97546	3.08478	2.93944	2.85
1.87	0.12665	0.054658	0.129471	0.429705	0.211155	0.318152	1.16963	2.09554	1.97865	3.08359	2.94327	2.85099
1.87333	0.115701	0.056283	0.129568	0.430881	0.211739	0.317152	1.17867	2.09944	1.98476	3.08519	2.94423	2.85258
1.87667	0.1239	0.054835	0.131102	0.425193	0.213041	0.31425	1.17303	2.10188	1.98716	3.09699	2.94762	2.85474
1.88	0.127282	0.054955	0.127719	0.428682	0.212322	0.313077	1.17607	2.10489	1.988	3.08865	2.94806	2.85661
1.88333	0.118667	0.056749	0.128341	0.429588	0.214727	0.316175	1.18112	2.10782	1.99008	3.09611	2.94984	2.85759
1.88667	0.117393	0.057025	0.124436	0.438788	0.216147	0.31685	1.17895	2.11114	1.99429	3.10116	2.95065	2.861
1.89	0.115588	0.055457	0.128281	0.429224	0.214008	0.319551	1.17922	2.11345	1.99719	3.09889	2.95165	2.86373
1.89333	0.124518	0.056401	0.125134	0.430976	0.215274	0.324088	1.18866	2.11597	1.99649	3.10387	2.95233	2.8659
1.89667	0.125989	0.056831	0.128143	0.438936	0.215545	0.327322	1.18836	2.11708	1.99899	3.10062	2.9552	2.86762
1.9	0.121877	0.056108	0.127013	0.437097	0.213634	0.325615	1.18752	2.11966	2.00534	3.10456	2.95524	2.86718
1.90333	0.115077	0.055034	0.129931	0.432059	0.213537	0.325715	1.19205	2.12153	2.00893	3.10548	2.95743	2.8695
1.90667	0.118593	0.056224	0.126112	0.428988	0.214651	0.324648	1.19385	2.12522	2.00844	3.10618	2.96108	2.86993
1.91	0.12948	0.056334	0.128813	0.440359	0.215918	0.325581	1.19189	2.12817	2.0122	3.1157	2.96096	2.87116
1.91333	0.11847	0.056493	0.130313	0.438611	0.215462	0.326799	1.19625	2.1328	2.01699	3.11741	2.96387	2.87121
1.91667	0.117728	0.055348	0.131247	0.443123	0.21972	0.326661	1.19707	2.13495	2.01802	3.1151	2.96412	2.87487
1.92	0.12645	0.056368	0.130334	0.436994	0.221581	0.331658	1.19273	2.13944	2.01847	3.12045	2.96627	2.87544
1.92333	0.12099	0.056561	0.13133	0.437588	0.223314	0.335188	1.19824	2.14167	2.02179	3.11934	2.96623	2.87618
1.92667	0.119716	0.05594	0.1303	0.438465	0.222771	0.336007	1.20312	2.14458	2.02543	3.12065	2.96784	2.87837
1.93	0.117768	0.056917	0.129019	0.438812	0.224006	0.336517	1.20865	2.14724	2.02778	3.12386	2.96711	2.88098
1.93333	0.123482	0.057265	0.130384	0.448332	0.222664	0.340588	1.20144	2.15112	2.03013	3.122	2.97111	2.88135
1.93667	0.119781	0.05663	0.130375	0.443625	0.222462	0.340405	1.20432	2.15291	2.03305	3.12583	2.97173	2.88212
1.94	0.122609	0.055967	0.132697	0.440446	0.22411	0.341386	1.20703	2.1565	2.03812	3.12579	2.97496	2.88487
1.94333	0.123897	0.056537	0.133464	0.448449	0.224761	0.344548	1.21186	2.15895	2.0413	3.12759	2.97722	2.88713
1.94667	0.126464	0.054396	0.136182	0.445962	0.225595	0.34886	1.2067	2.16208	2.04214	3.13498	2.97917	2.89029
1.95	0.126087	0.054031	0.13296	0.44637	0.226011	0.352735	1.21052	2.16285	2.04359	3.13221	2.9812	2.8925
1.95333	0.12552	0.05436	0.132342	0.44168	0.227005	0.353013	1.21865	2.16481	2.04658	3.13158	2.98296	2.89352
1.95667	0.123824	0.054456	0.12939	0.443525	0.227072	0.356484	1.21749	2.16784	2.04889	3.13543	2.98386	2.8957
1.96	0.123328	0.055873	0.131871	0.449653	0.228674	0.358448	1.21768	2.17128	2.04963	3.14126	2.98692	2.89458
1.96333	0.126464	0.056977	0.126159	0.446582	0.229358	0.357273	1.22039	2.17314	2.04931	3.13985	2.99008	2.89513
1.96667	0.123518	0.058902	0.130664	0.444915	0.231795	0.358797	1.22565	2.17645	2.05187	3.14281	2.9912	2.89641
1.97	0.131383	0.060398	0.131272	0.449125	0.231886	0.360387	1.22515	2.17924	2.05727	3.14056	2.9933	2.90035
1.97333	0.125998	0.059448	0.13444	0.452704	0.232516	0.362484	1.22394	2.18015	2.05829	3.14761	2.99414	2.90051
1.97667	0.128455	0.058613	0.131722	0.455635	0.231938	0.363953	1.22988	2.18148	2.05967	3.15481	2.99557	2.90199
1.98	0.122905	0.058062	0.137578	0.454013	0.232087	0.366558	1.22556	2.183	2.06436	3.14386	2.99753	2.90377
1.98333	0.126102	0.056996	0.134497	0.454008	0.232478	0.366568	1.23278	2.18514	2.06956	3.15186	2.99976	2.904
1.98667	0.125451	0.056894	0.13486	0.452882	0.23211	0.36761	1.23363	2.18628	2.07088	3.15154	2.99962	2.90438
1.99	0.12889	0.057582	0.132955	0.46095	0.233011	0.365586	1.22667	2.19001	2.07223	3.15714	3.00082	2.90766
1.99333	0.125866	0.058938	0.13373	0.460329	0.236089	0.365799	1.23691	2.19332	2.07579	3.15554	3.00214	2.91129
1.99667	0.127077	0.05928	0.13159	0.458835	0.236724	0.36708	1.23781	2.19659	2.07759	3.15397	2.9998	2.91035
2	0.127344	0.059476	0.131281	0.454667	0.237286	0.36609	1.24693	2.19849	2.07915	3.15679	3.0009	2.91456
2.00333	0.126682	0.059367	0.132056	0.459136	0.24079	0.371883	1.24515	2.203	2.08177	3.16009	3.00287	2.91462
2.00667	0.127277	0.060393	0.130414	0.45988	0.241899	0.374417	1.24468	2.2052	2.08441	3.16622	3.00543	2.91488
2.01	0.120928	0.060776	0.130824	0.463102	0.24073	0.378488	1.25318	2.20857	2.0862	3.16706	3.00594	2.91527
2.01333	0.125139	0.06065	0.129575	0.465666	0.2429	0.376454	1.24885	2.21013	2.09024	3.16699	3.01041	2.92021
2.01667	0.125541	0.060359	0.133104	0.469677	0.243945	0.378001	1.24934	2.21374	2.09298	3.16519	3.01146	2.91672
2.02	0.125083	0.061536	0.130555	0.460446	0.242462	0.372988	1.25448	2.21568	2.09418	3.16853	3.01458	2.91588
2.02333	0.122515	0.060432	0.131796	0.468722	0.242056	0.374028	1.26024	2.21807	2.09761	3.16598	3.01516	2.91622
2.02667	0.122513	0.060929	0.132194	0.469169	0.24479	0.372138	1.25704	2.21798	2.10147	3.17162	3.01574	2.91602
2.03	0.125211	0.059188	0.134587	0.467906	0.245065	0.377349	1.25528	2.22052	2.10488	3.16913	3.01239	2.9133
2.03333	0.130092	0.06015	0.131608	0.463415	0.24692	0.377964	1.2601	2.22242	2.10473	3.17546	3.01581	2.91792
2.03667	0.131992	0.061211	0.133315	0.466976	0.249137	0.379676	1.2521	2.22333	2.10498	3.17819	3.0163	2.92327
2.04	0.118137	0.062853	0.134224	0.46691	0.25226	0.378568	1.25464	2.22618	2.10573	3.18012	3.01726	2.92588
2.04333	0.125618	0.060295	0.132423	0.470853	0.251771	0.376808	1.26467	2.22957	2.10924	3.18234	3.02082	2.92583
2.04667	0.134676	0.061232	0.132803	0.471819	0.253647	0.372126	1.26764	2.23173	2.10998	3.18113	3.02602	2.92762
2.05	0.128963	0.062319	0.132988	0.471937	0.255064	0.368983	1.26993	2.23469	2.11268	3.18636	3.02385	2.92677
2.05333	0.123388	0.06057	0.135807	0.473634	0.254244	0.367782	1.26961	2.23777	2.11438	3.18444	3.02548	2.92403
2.05667	0.134966	0.059015	0.133559	0.472237	0.252599	0.366807	1.26929	2.24009	2.11944	3.18396	3.0266	2.92351
2.06	0.132637	0.05896	0.137087	0.477019	0.255398	0.366197	1.27648	2.24284	2.1208	3.18767	3.02679	2.92601
2.06333	0.128578	0.058992	0.133156	0.478919	0.256043	0.368241	1.27342	2.24481	2.1234	3.1897	3.02675	2.9282
2.06667	0.136317	0.058511	0.135878	0.48114	0.253959	0.372442	1.27303	2.24614	2.12594	3.18278	3.031	2.93087
2.07	0.127314	0.058084	0.131131	0.477862	0.256077	0.373386	1.27137	2.24856	2.12738	3.19518	3.03116	2.93352
2.07333	0.129105	0.058835	0.133093	0.483341	0.258394	0.37419	1.28261	2.25043	2.13019	3.19306	3.03324	2.93424
2.07667	0.13028	0.059607	0.129917	0.480028	0.257914	0.377488	1.2786	2.25127	2.13269	3.19239	3.03493	2.93634
2.08	0.12879	0.060868	0.134138	0.485831	0.258753	0.378281	1.28219	2.25439	2.13433	3.1954	3.03846	2.93622
2.08333	0.132394	0.060661	0.132569	0.485896	0.261043	0.379254	1.28512	2.25663	2.13588	3.19553	3.03743	2.93715
2.08667	0.133062	0.059017	0.135653	0.483874	0.261767	0.381412	1.2922	2.25896	2.13874	3.19989	3.0409	2.93845
2.09	0.129427	0.059881	0.137503	0.483133	0.261673	0.385276	1.29	2.26303	2.14045	3.20225	3.04112	2.93955
2.09333	0.134605	0.058611	0.138811	0.483899	0.263132	0.384844	1.28761	2.2651	2.14321	3.19895	3.04151	2.93984
2.09667	0.128611	0.058922	0.138986	0.488721	0.262704	0.386566	1.29152	2.26704	2.14481	3.19925	3.04176	2.94121
2.1	0.131277	0.058952	0.137661	0.487418	0.262888	0.386849	1.29407	2.26988	2.14585	3.20697	3.04395	2.94395
2.10333	0.129814	0.059952	0.136605	0.490776	0.264266	0.387789	1.29381	2.27251	2.14971	3.20102	3.04261	2.94613
2.10667	0.133111	0.059523	0.134302	0.485308	0.265077	0.386671	1.29358	2.27397	2.15263	3.21031	3.04507	2.94777
2.11	0.13921	0.061457	0.134958	0.488031	0.265046	0.390153	1.29574	2.27725	2.1528	3.20431	3.04592	2.94975
2.11333	0.130771	0.061768	0.130605	0.495612	0.267865	0.390169	1.29957	2.27892	2.15365	3.20388	3.04763	2.9497
2.11667	0.129905	0.061036	0.131436	0.487898	0.268224	0.392526	1.29954	2.28055	2.15691	3.20079	3.04719	2.94708
2.12	0.134005	0.060618	0.129671	0.489931	0.268577	0.393117	1.30715	2.28233	2.15868	3.2079	3.05031	2.94715
2.12333	0.127364	0.060905	0.132898	0.495743	0.271133	0.39498	1.3047	2.28375	2.1619	3.20867	3.05007	2.94686
2.12667	0.131114	0.061591	0.131074	0.494176	0.272722	0.394328	1.30842	2.28523	2.16464	3.2102	3.05043	2.94683
2.13	0.127288	0.061293	0.135764	0.494228	0.27218	0.396693	1.30612	2.28576	2.16792	3.21158	3.05192	2.94984
2.13333	0.127426	0.060867	0.13662	0.496356	0.275617	0.396169	1.3063	2.28755	2.17026	3.21492	3.05446	2.95289
2.13667	0.130196	0.063249	0.139122	0.498649	0.277681	0.401039	1.30976	2.28844	2.17204	3.22449	3.05383	2.95431
2.14	0.134834	0.064176	0.136517	0.499768	0.277852	0.402204	1.31195	2.29129	2.17228	3.21791	3.05553	2.95692
2.14333	0.126189	0.064127	0.1378	0.499559	0.278746	0.403545	1.31508	2.29278	2.17197	3.22293	3.05714	2.95844
2.14667	0.129142	0.062543	0.136204	0.494543	0.279899	0.404717	1.31384	2.29662	2.17351	3.22524	3.05521	2.95832
2.15	0.131466	0.063394	0.134224	0.502742	0.281051	0.407869	1.31733	2.29845	2.17655	3.21856	3.05683	2.95831
2.15333	0.128798	0.062956	0.134714	0.505947	0.281342	0.408535	1.31924	2.30125	2.17543	3.21542	3.0574	2.95897
2.15667	0.138436	0.062769	0.132709	0.501341	0.284149	0.409085	1.32034	2.30275	2.17792	3.22443	3.05865	2.96004
2.16	0.131231	0.063585	0.132365	0.501297	0.28363	0.411336	1.31516	2.30544	2.1818	3.22315	3.06001	2.95975
2.16333	0.133074	0.063336	0.131876	0.507273	0.284998	0.412629	1.3275	2.30754	2.18235	3.22573	3.06187	2.961
2.16667	0.130485	0.063622	0.137196	0.509722	0.286586	0.412442	1.32838	2.31037	2.18496	3.22535	3.06234	2.96397
2.17	0.134008	0.065051	0.136357	0.506751	0.287837	0.411696	1.32738	2.31228	2.18835	3.22734	3.06287	2.96198
2.17333	0.133564	0.063244	0.139074	0.510142	0.288382	0.41227	1.32841	2.31491	2.18954	3.22638	3.06482	2.96468
2.17667	0.135337	0.063992	0.141986	0.508922	0.292077	0.414523	1.33128	2.31667	2.19163	3.22802	3.06582	2.96606
2.18	0.136596	0.064691	0.142607	0.508747	0.291455	0.415974	1.33438	2.31896	2.19368	3.23369	3.06742	2.96691
2.18333	0.135258	0.065891	0.140074	0.50823	0.291635	0.417257	1.33579	2.32004	2.1943	3.2332	3.06916	2.96764
2.18667	0.141155	0.064134	0.13817	0.509342	0.291487	0.420139	1.33814	2.32148	2.19744	3.23188	3.0702	2.97159
2.19	0.134199	0.065232	0.138188	0.516977	0.291489	0.422208	1.33531	2.32363	2.19653	3.23605	3.07101	2.971
2.19333	0.132848	0.062917	0.13471	0.514439	0.289153	0.4197	1.3409	2.32513	2.19977	3.23064	3.07372	2.97234
2.19667	0.140812	0.064525	0.134226	0.519827	0.291645	0.417755	1.33643	2.32683	2.20209	3.23921	3.07468	2.97341
2.2	0.133294	0.06531	0.134534	0.51499	0.291384	0.418634	1.34386	2.32782	2.20203	3.23895	3.07319	2.97428
2.20333	0.139056	0.065295	0.138118	0.516048	0.291727	0.417462	1.35097	2.32998	2.2055	3.24059	3.078	2.97498
2.20667	0.135556	0.066562	0.139231	0.510489	0.29262	0.419913	1.346	2.33144	2.20729	3.24118	3.07872	2.9757
2.21	0.133723	0.065759	0.139967	0.515403	0.294231	0.422055	1.34567	2.33429	2.20757	3.24085	3.0797	2.97871
2.21333	0.135133	0.066358	0.1437	0.519741	0.294607	0.423982	1.35002	2.33552	2.21055	3.24802	3.08175	2.97841
2.21667	0.137295	0.065189	0.140933	0.525283	0.294866	0.422509	1.34743	2.33814	2.21015	3.24785	3.08422	2.98167
2.22	0.131275	0.063923	0.141886	0.524608	0.296632	0.421468	1.35259	2.33987	2.21165	3.24383	3.08346	2.98152
2.22333	0.137751	0.063437	0.13835	0.524497	0.297666	0.419263	1.35478	2.34135	2.21626	3.24595	3.08467	2.9827
2.22667	0.138704	0.065234	0.140996	0.525748	0.299313	0.419665	1.35428	2.34217	2.21616	3.2391	3.0862	2.98291
2.23	0.133642	0.065494	0.136964	0.528186	0.300691	0.419563	1.35846	2.34419	2.21989	3.24603	3.08782	2.98566
2.23333	0.137806	0.063918	0.139123	0.523449	0.30115	0.422938	1.35981	2.34685	2.22349	3.24577	3.08855	2.98495
2.23667	0.139424	0.065619	0.136972	0.527296	0.303257	0.426757	1.36344	2.34812	2.22342	3.24568	3.09039	2.9878
2.24	0.134179	0.066506	0.139422	0.529832	0.304378	0.428178	1.35527	2.34956	2.22566	3.25101	3.09201	2.99149
2.24333	0.142771	0.066499	0.136985	0.526376	0.306439	0.429227	1.35797	2.35274	2.22534	3.25478	3.09242	2.99191
2.24667	0.137597	0.065448	0.137328	0.526524	0.306584	0.43091	1.36771	2.35359	2.22539	3.24261	3.09284	2.99233
2.25	0.137925	0.066185	0.138863	0.533619	0.310495	0.432003	1.3695	2.35509	2.22943	3.25401	3.09389	2.99399
2.25333	0.138027	0.066829	0.137427	0.529833	0.309485	0.432591	1.36904	2.35765	2.23034	3.25346	3.09493	2.99519
2.25667	0.143006	0.065183	0.136871	0.534981	0.309959	0.43538	1.36996	2.35964	2.2318	3.25228	3.09526	2.99365
2.26	0.136221	0.066174	0.138313	0.531851	0.309681	0.436721	1.36495	2.36283	2.23502	3.25091	3.0944	2.99381
2.26333	0.135247	0.067001	0.139244	0.529681	0.310031	0.438943	1.37523	2.36482	2.23553	3.25452	3.09461	2.99601
2.26667	0.139109	0.06758	0.13952	0.538689	0.309706	0.439446	1.37805	2.36698	2.23819	3.25582	3.09664	2.9961
2.27	0.134414	0.067867	0.138464	0.536806	0.31196	0.4418	1.374	2.36887	2.23931	3.26587	3.0978	2.99486
2.27333	0.139078	0.069241	0.138806	0.538886	0.313812	0.442844	1.37528	2.37097	2.24099	3.2591	3.09744	2.99573
2.27667	0.138826	0.067956	0.137791	0.533462	0.31431	0.445259	1.37807	2.37131	2.24436	3.25913	3.09986	2.99467
2.28	0.13567	0.065735	0.137763	0.540227	0.316724	0.446108	1.37915	2.37367	2.24409	3.26448	3.10209	2.99527
2.28333	0.138639	0.066636	0.134983	0.540953	0.317782	0.447617	1.38064	2.37508	2.24462	3.26447	3.10297	2.99669
2.28667	0.13721	0.067464	0.139663	0.540616	0.31838	0.447816	1.38129	2.37571	2.24939	3.27017	3.10286	2.99606
2.29	0.138331	0.065705	0.143086	0.53858	0.31779	0.449439	1.38042	2.37776	2.24957	3.2674	3.10395	2.9971
2.29333	0.140452	0.066254	0.142086	0.544056	0.31952	0.449773	1.37925	2.37978	2.25322	3.2669	3.10549	3.00015
2.29667	0.136827	0.06779	0.144173	0.54082	0.318735	0.452575	1.38619	2.38076	2.25599	3.26781	3.10633	2.99998
2.3	0.142719	0.067521	0.144166	0.545197	0.31945	0.454934	1.38973	2.38234	2.25575	3.27046	3.10786	2.99858
2.30333	0.137526	0.064677	0.142438	0.547285	0.319265	0.45722	1.38901	2.38442	2.25675	3.27048	3.10872	3.0022
2.30667	0.136219	0.066033	0.139007	0.548092	0.318164	0.456968	1.39238	2.38448	2.2589	3.27018	3.11085	3.00246
2.31	0.141395	0.065538	0.142837	0.549263	0.319672	0.459721	1.39531	2.38718	2.25774	3.27366	3.11238	3.00348
2.31333	0.141598	0.067702	0.142163	0.55137	0.322568	0.460511	1.39683	2.38979	2.26257	3.26761	3.11283	3.00678
2.31667	0.139359	0.067286	0.141219	0.553409	0.321578	0.460274	1.3937	2.39133	2.26252	3.27198	3.1121	3.00979
2.32	0.138711	0.069175	0.141837	0.546614	0.322767	0.460542	1.39776	2.39357	2.26416	3.26953	3.11299	3.00946
2.32333	0.141832	0.070818	0.142518	0.546492	0.329074	0.461553	1.39284	2.39589	2.26771	3.27226	3.11316	3.01205
2.32667	0.139087	0.070299	0.138368	0.559117	0.328872	0.462724	1.40509	2.39669	2.26792	3.27481	3.11426	3.01541
2.33	0.138211	0.069417	0.138411	0.554233	0.328437	0.465516	1.4038	2.39853	2.26974	3.27532	3.11445	3.01266
2.33333	0.14314	0.068793	0.140707	0.559738	0.330477	0.467175	1.40301	2.40009	2.27296	3.27132	3.11624	3.01069
2.33667	0.14159	0.068744	0.143044	0.5553	0.330596	0.469124	1.39835	2.4017	2.27093	3.27198	3.11788	3.01205
2.34	0.14407	0.06756	0.142687	0.554728	0.326874	0.470498	1.40836	2.40344	2.27273	3.28158	3.1192	3.00907
2.34333	0.133448	0.069006	0.145802	0.554838	0.327997	0.472288	1.40715	2.4051	2.27485	3.27352	3.11796	3.00635
2.34667	0.145565	0.068203	0.143689	0.557038	0.326994	0.471518	1.40874	2.4065	2.27293	3.27402	3.11857	3.00799
2.35	0.147586	0.068482	0.14359	0.563553	0.327449	0.47243	1.41499	2.408	2.2775	3.28167	3.12048	3.00923
2.35333	0.143112	0.069602	0.140825	0.559296	0.330758	0.472901	1.41317	2.41019	2.28044	3.27758	3.12037	3.01138
2.35667	0.147606	0.069094	0.139879	0.556922	0.334068	0.47844	1.4186	2.4119	2.28035	3.283	3.12195	3.01372
2.36	0.141357	0.067833	0.141619	0.558667	0.333846	0.480688	1.41165	2.41235	2.28555	3.28422	3.12335	3.01591
2.36333	0.139937	0.066431	0.140278	0.560278	0.339175	0.480657	1.41946	2.41337	2.28644	3.28018	3.12443	3.01759
2.36667	0.137096	0.067814	0.140032	0.560372	0.342643	0.484251	1.41761	2.4153	2.2878	3.27741	3.12569	3.01902
2.37	0.141747	0.067394	0.141054	0.567173	0.343733	0.482435	1.42944	2.41647	2.28889	3.28441	3.12716	3.02015
2.37333	0.145437	0.06659	0.141852	0.566527	0.342007	0.479617	1.42197	2.41835	2.28882	3.28334	3.12689	3.02048
2.37667	0.145436	0.068023	0.140716	0.569165	0.346616	0.47687	1.42473	2.42186	2.29013	3.28628	3.12781	3.02325
2.38	0.14496	0.06925	0.143556	0.568795	0.345789	0.476584	1.43026	2.4234	2.29196	3.28779	3.12829	3.02437
2.38333	0.147667	0.070141	0.145583	0.567778	0.344789	0.475089	1.43059	2.4249	2.29106	3.28944	3.12616	3.02425
2.38667	0.139858	0.06995	0.1456	0.574912	0.344743	0.479367	1.42968	2.42533	2.29584	3.2849	3.12613	3.02361
2.39	0.139537	0.071384	0.145838	0.567567	0.346942	0.478846	1.42579	2.42661	2.2988	3.29326	3.12724	3.02371
2.39333	0.142423	0.070619	0.14773	0.574445	0.343868	0.47852	1.43309	2.42798	2.29752	3.29042	3.1292	3.02246
2.39667	0.13921	0.072217	0.145285	0.574742	0.34466	0.480955	1.43018	2.43011	2.30251	3.28175	3.13239	3.02218
2.4	0.145121	0.071533	0.143762	0.577782	0.344954	0.481869	1.43211	2.43133	2.30144	3.29051	3.13428	3.02459
2.40333	0.144381	0.070296	0.142794	0.574753	0.345114	0.481696	1.43751	2.43341	2.3019	3.29378	3.13673	3.02376
2.40667	0.140908	0.071739	0.14379	0.576982	0.345925	0.485539	1.43191	2.43495	2.30385	3.29202	3.13742	3.0268
2.41	0.137229	0.072983	0.140407	0.572593	0.347926	0.487972	1.44425	2.43645	2.30419	3.293	3.13737	3.02687
2.41333	0.144764	0.071899	0.141634	0.576969	0.348471	0.489282	1.44205	2.4383	2.30533	3.29817	3.13569	3.0257
2.41667	0.14232	0.070255	0.141247	0.578048	0.348763	0.490134	1.4426	2.43944	2.3098	3.29542	3.1367	3.02521
2.42	0.144632	0.072432	0.141698	0.58088	0.35093	0.49181	1.44735	2.44246	2.30841	3.29509	3.13667	3.02618
2.42333	0.13688	0.07136	0.143523	0.575228	0.350016	0.490483	1.45415	2.44402	2.31033	3.2976	3.13848	3.02475
2.42667	0.142781	0.070502	0.14375	0.582481	0.348249	0.488158	1.44377	2.44409	2.31314	3.29705	3.13995	3.02429
2.43	0.141341	0.068904	0.144016	0.582162	0.349628	0.488112	1.45055	2.44432	2.31117	3.29926	3.14077	3.02701
2.43333	0.142887	0.071541	0.14696	0.58182	0.348463	0.488734	1.45085	2.44642	2.31318	3.29802	3.14307	3.0282
2.43667	0.138723	0.071018	0.145394	0.586223	0.347427	0.488766	1.45137	2.44635	2.31425	3.29124	3.14239	3.03005
2.44	0.143775	0.069762	0.142893	0.587504	0.349956	0.489607	1.45124	2.44716	2.31396	3.29996	3.14167	3.03203
2.44333	0.146105	0.070021	0.143364	0.585118	0.354919	0.492429	1.45542	2.45021	2.31755	3.29561	3.14261	3.03321
2.44667	0.145828	0.071229	0.143814	0.586776	0.356574	0.492458	1.46013	2.45156	2.31835	3.30024	3.14409	3.03389
2.45	0.146692	0.071644	0.142391	0.591413	0.360732	0.491995	1.45946	2.45409	2.31789	3.30445	3.14473	3.03396
2.45333	0.14471	0.070711	0.144045	0.589085	0.363384	0.4927	1.45495	2.45501	2.3217	3.30242	3.14801	3.03477
2.45667	0.148116	0.071766	0.147653	0.592705	0.364437	0.493372	1.46165	2.45627	2.32252	3.30007	3.1498	3.03495
2.46	0.14626	0.07107	0.145709	0.593526	0.36437	0.494372	1.46079	2.45877	2.3255	3.30196	3.14925	3.03525
2.46333	0.141085	0.072441	0.146682	0.598814	0.366765	0.496109	1.46237	2.46119	2.32766	3.30126	3.15002	3.03744
2.46667	0.14373	0.070466	0.14582	0.590303	0.369126	0.498016	1.46475	2.46064	2.32897	3.29608	3.15078	3.03963
2.47	0.147474	0.071184	0.144905	0.594453	0.372231	0.497553	1.46475	2.46168	2.33177	3.30467	3.15121	3.04184
2.47333	0.145984	0.072731	0.144367	0.597181	0.373794	0.499152	1.46578	2.46441	2.33175	3.30859	3.15248	3.04404
2.47667	0.142262	0.074112	0.145434	0.601649	0.373721	0.500095	1.47294	2.46468	2.33124	3.30416	3.15459	3.04565
2.48	0.147289	0.074527	0.146979	0.597623	0.372901	0.50017	1.47294	2.46659	2.3336	3.30683	3.15384	3.04607
2.48333	0.149796	0.074598	0.146999	0.603268	0.371872	0.500046	1.4756	2.46817	2.33417	3.30447	3.15373	3.04622
2.48667	0.14996	0.075815	0.146726	0.597435	0.370038	0.502098	1.47202	2.47159	2.33446	3.30366	3.15439	3.04446
2.49	0.145364	0.074668	0.144466	0.602085	0.369229	0.501684	1.47421	2.47257	2.33784	3.30864	3.15474	3.0436
2.49333	0.156353	0.075095	0.144795	0.603618	0.368849	0.503142	1.47401	2.47372	2.33671	3.30645	3.15474	3.04437
2.49667	0.146322	0.073708	0.14332	0.602076	0.368864	0.504872	1.46913	2.47522	2.34006	3.30688	3.1557	3.04482
2.5	0.152754	0.074753	0.143704	0.605529	0.368562	0.507989	1.48528	2.47692	2.34115	3.31296	3.15621	3.04669
2.50333	0.148841	0.073723	0.147517	0.60503	0.368791	0.50893	1.47778	2.47794	2.34096	3.30287	3.15606	3.04736
2.50667	0.147207	0.073631	0.147958	0.604835	0.370037	0.512127	1.48713	2.47988	2.34464	3.30997	3.15421	3.04916
2.51	0.148084	0.073358	0.149733	0.606719	0.371915	0.513121	1.47908	2.48192	2.34535	3.31242	3.15617	3.05008
2.51333	0.151764	0.073731	0.150349	0.606414	0.3738	0.513557	1.4795	2.48127	2.34442	3.31347	3.15957	3.05159
2.51667	0.149551	0.0739	0.151	0.609134	0.375733	0.514468	1.485	2.48259	2.34891	3.31359	3.15892	3.04781
2.52	0.146203	0.073918	0.1504	0.614469	0.375056	0.515561	1.4888	2.48394	2.34899	3.31129	3.16073	3.04919
2.52333	0.149892	0.075256	0.149501	0.615082	0.377261	0.515147	1.49085	2.48396	2.34886	3.31459	3.1624	3.04925
2.52667	0.148887	0.074015	0.150269	0.610724	0.380042	0.515531	1.48803	2.48491	2.35239	3.31756	3.16161	3.04566
2.53	0.150945	0.074999	0.147711	0.619134	0.380125	0.519874	1.48784	2.48681	2.35238	3.31233	3.16326	3.0451
2.53333	0.153253	0.074811	0.147075	0.615612	0.37803	0.519528	1.49135	2.48747	2.3537	3.31551	3.16662	3.04403
2.53667	0.149077	0.074647	0.144561	0.617139	0.380208	0.520328	1.49121	2.48763	2.35558	3.32082	3.16521	3.04427
2.54	0.150234	0.074609	0.147142	0.615662	0.380829	0.523246	1.49863	2.48916	2.35399	3.31686	3.16844	3.04394
2.54333	0.148807	0.076197	0.145179	0.62311	0.379822	0.526652	1.50205	2.48973	2.35665	3.3177	3.1694	3.04745
2.54667	0.151205	0.075585	0.148131	0.618906	0.380238	0.526885	1.49727	2.49199	2.3572	3.31726	3.16689	3.04743
2.55	0.150094	0.075865	0.151462	0.618328	0.383236	0.52949	1.50218	2.49338	2.35722	3.32034	3.16452	3.05433
2.55333	0.150256	0.078096	0.151631	0.617745	0.383501	0.532923	1.50201	2.49528	2.36162	3.32653	3.16824	3.05344
2.55667	0.15169	0.075979	0.152758	0.623443	0.382817	0.533883	1.49746	2.49705	2.36286	3.31753	3.16944	3.05569
2.56	0.146984	0.076731	0.151596	0.621873	0.384737	0.534948	1.50258	2.49911	2.36352	3.31401	3.16843	3.0571
2.56333	0.152636	0.077319	0.152367	0.627668	0.385981	0.534891	1.50531	2.49898	2.36661	3.31687	3.17182	3.05991
2.56667	0.153219	0.077291	0.149898	0.625322	0.387794	0.537472	1.50653	2.50054	2.36532	3.31352	3.17442	3.06125
2.57	0.152005	0.075116	0.150838	0.628854	0.393527	0.538361	1.50803	2.50183	2.36653	3.32299	3.17424	3.06358
2.57333	0.154328	0.07658	0.149062	0.627364	0.394507	0.539828	1.50972	2.50235	2.3695	3.3257	3.17322	3.05889
2.57667	0.14605	0.075012	0.149877	0.627294	0.396314	0.541647	1.51074	2.50413	2.36924	3.31866	3.17496	3.05857
2.58	0.152412	0.075578	0.148235	0.637103	0.398406	0.543329	1.51375	2.50638	2.37318	3.32032	3.17457	3.05774
2.58333	0.15495	0.076009	0.148164	0.633156	0.399595	0.543977	1.51411	2.50725	2.37418	3.32028	3.17602	3.05356
2.58667	0.149976	0.076653	0.150104	0.633013	0.399075	0.545021	1.51578	2.50797	2.3742	3.32349	3.17507	3.05533
2.59	0.152674	0.077685	0.150932	0.634503	0.403012	0.547141	1.51525	2.50968	2.37649	3.32204	3.17609	3.06086
2.59333	0.152553	0.078575	0.152225	0.629064	0.401739	0.546407	1.51459	2.5116	2.37721	3.32052	3.17868	3.06109
2.59667	0.154576	0.077637	0.154527	0.631883	0.402222	0.547575	1.52138	2.51181	2.37661	3.32421	3.17702	3.06273
2.6	0.158974	0.077279	0.15278	0.634345	0.404188	0.548665	1.52478	2.51322	2.37906	3.32008	3.17967	3.06564
2.60333	0.150685	0.077628	0.154367	0.636977	0.405906	0.548742	1.52447	2.51424	2.37719	3.32906	3.18152	3.06558
2.60667	0.157618	0.077471	0.152049	0.637578	0.407239	0.550354	1.52708	2.51576	2.37908	3.32347	3.18187	3.06598
2.61	0.151269	0.076811	0.153226	0.64216	0.412067	0.551851	1.52386	2.516	2.38023	3.32884	3.18171	3.06893
2.61333	0.154584	0.076213	0.151654	0.635468	0.413229	0.554588	1.52682	2.51849	2.38036	3.32135	3.18515	3.06796
2.61667	0.15591	0.076033	0.152516	0.639738	0.413058	0.556141	1.52757	2.52072	2.38383	3.32963	3.18311	3.06784
2.62	0.151157	0.075972	0.151379	0.642623	0.413333	0.559553	1.52674	2.52135	2.38599	3.32984	3.18273	3.06859
2.62333	0.152906	0.075288	0.152756	0.642654	0.413057	0.559981	1.53296	2.52272	2.38465	3.3306	3.18423	3.06858
2.62667	0.151619	0.076125	0.154247	0.642439	0.413951	0.562714	1.53186	2.52523	2.38793	3.32533	3.18582	3.06719
2.63	0.155269	0.078152	0.152792	0.650612	0.415806	0.563445	1.53608	2.52598	2.38775	3.33026	3.18628	3.06788
2.63333	0.15638	0.078056	0.156115	0.644459	0.416926	0.563595	1.52882	2.52635	2.38793	3.32974	3.18515	3.07079
2.63667	0.157104	0.078574	0.155529	0.648467	0.416724	0.563007	1.53425	2.5288	2.39012	3.32561	3.18703	3.06814
2.64	0.148294	0.080178	0.154254	0.648774	0.418756	0.565857	1.53623	2.52978	2.39062	3.32879	3.186	3.06715
2.64333	0.152137	0.081627	0.154602	0.645804	0.416807	0.566731	1.5415	2.53183	2.39262	3.32921	3.18479	3.07005
2.64667	0.15509	0.081508	0.155818	0.651258	0.416338	0.569954	1.54116	2.53239	2.39434	3.3248	3.18411	3.06978
2.65	0.151608	0.080828	0.15717	0.647302	0.41732	0.573073	1.54364	2.53319	2.3932	3.33285	3.18668	3.06844
2.65333	0.152425	0.081028	0.155555	0.653823	0.417837	0.576259	1.54652	2.53362	2.39622	3.3332	3.18669	3.07232
2.65667	0.156151	0.080133	0.158035	0.656114	0.417471	0.577357	1.55	2.53388	2.3973	3.32895	3.18994	3.07464
2.66	0.155586	0.07978	0.155582	0.653142	0.419624	0.579347	1.54464	2.53339	2.39698	3.33357	3.19131	3.07509
2.66333	0.155727	0.078809	0.155388	0.654607	0.420154	0.580929	1.54667	2.53513	2.40089	3.34137	3.19156	3.07726
2.66667	0.156933	0.082276	0.152027	0.653535	0.419803	0.58495	1.55033	2.53753	2.40075	3.3326	3.19104	3.07787
2.67	0.157831	0.082215	0.152097	0.659523	0.419833	0.587744	1.55279	2.53972	2.39994	3.33072	3.19258	3.07783
2.67333	0.155896	0.081437	0.153718	0.658268	0.419533	0.587045	1.5547	2.54146	2.40313	3.33655	3.19234	3.07979
2.67667	0.154225	0.081564	0.153964	0.663905	0.417526	0.590973	1.54751	2.5434	2.40172	3.33805	3.19354	3.07952
2.68	0.157125	0.082416	0.15694	0.665835	0.420169	0.591299	1.55394	2.54583	2.40113	3.3361	3.19493	3.07896
2.68333	0.159163	0.081259	0.158794	0.668275	0.418917	0.592662	1.55913	2.54634	2.40559	3.34348	3.19828	3.07879
2.68667	0.155928	0.080407	0.158933	0.656844	0.421116	0.594489	1.56204	2.54759	2.40427	3.3356	3.19696	3.07991
2.69	0.15207	0.082406	0.158469	0.663897	0.422708	0.599892	1.55676	2.54901	2.40482	3.34415	3.19884	3.07841
2.69333	0.15374	0.080788	0.156747	0.66222	0.426456	0.599178	1.56163	2.55009	2.40803	3.33827	3.19853	3.07868
2.69667	0.15115	0.081938	0.156521	0.662186	0.427222	0.603207	1.56105	2.55032	2.40653	3.33565	3.20075	3.08095
2.7	0.162774	0.080426	0.154421	0.665912	0.430344	0.603	1.55662	2.55278	2.40716	3.3401	3.19915	3.08008
2.70333	0.154904	0.082147	0.155254	0.670592	0.428704	0.604935	1.56493	2.55267	2.41072	3.33574	3.20135	3.08005
2.70667	0.157551	0.081831	0.152872	0.662492	0.430496	0.604517	1.56377	2.55459	2.40974	3.34017	3.20075	3.08197
2.71	0.156143	0.082658	0.154622	0.672167	0.429404	0.607142	1.57183	2.5558	2.41237	3.3347	3.20287	3.08165
2.71333	0.152846	0.080406	0.153977	0.672624	0.42908	0.607948	1.57427	2.55598	2.41382	3.34073	3.20228	3.08334
2.71667	0.1573	0.082066	0.155338	0.679161	0.428626	0.607798	1.56275	2.55686	2.41293	3.34478	3.20502	3.08605
2.72	0.158068	0.081326	0.158583	0.671067	0.43172	0.605715	1.56497	2.55889	2.41597	3.33765	3.20635	3.08637
2.72333	0.153182	0.079972	0.160837	0.671195	0.431536	0.606096	1.57728	2.55874	2.41686	3.34362	3.20676	3.08573
2.72667	0.155164	0.080415	0.160616	0.678656	0.432837	0.60693	1.57788	2.56021	2.41689	3.34178	3.20656	3.08793
2.73	0.152642	0.081065	0.162007	0.676489	0.434114	0.606243	1.57579	2.56113	2.42113	3.34212	3.20576	3.08722
2.73333	0.154679	0.081262	0.160572	0.682597	0.436418	0.609619	1.57822	2.56094	2.42238	3.34143	3.20479	3.08659
2.73667	0.157548	0.079993	0.1599	0.683769	0.436107	0.612886	1.57474	2.56215	2.42052	3.34778	3.20467	3.08756
2.74	0.159076	0.081516	0.156985	0.681478	0.436045	0.614941	1.57802	2.56303	2.42459	3.34358	3.20394	3.08812
2.74333	0.159884	0.082444	0.158992	0.678607	0.438094	0.614107	1.58381	2.56401	2.42344	3.34228	3.20547	3.08428
2.74667	0.158043	0.083092	0.157836	0.678956	0.437227	0.614992	1.58933	2.56743	2.42277	3.34195	3.20794	3.08381
2.75	0.156795	0.08224	0.158323	0.6823	0.437643	0.613902	1.58537	2.56948	2.42538	3.35037	3.20936	3.08271
2.75333	0.155459	0.084384	0.156785	0.681001	0.437761	0.615236	1.58616	2.57113	2.42525	3.33303	3.20979	3.08113
2.75667	0.154128	0.084555	0.158333	0.684947	0.438495	0.61744	1.59068	2.5737	2.42572	3.343	3.21204	3.08133
2.76	0.160091	0.083544	0.158709	0.685982	0.438605	0.618613	1.58771	2.57322	2.43065	3.34173	3.21188	3.08825
2.76333	0.158653	0.082781	0.159211	0.68756	0.441322	0.62092	1.587	2.57279	2.42828	3.34561	3.21096	3.08828
2.76667	0.160709	0.083823	0.159118	0.68557	0.443584	0.624121	1.58779	2.5735	2.43108	3.33712	3.21117	3.09197
2.77	0.154157	0.08224	0.162195	0.688775	0.4441	0.624986	1.593	2.57375	2.43354	3.34211	3.21298	3.09656
2.77333	0.160551	0.081307	0.161754	0.689388	0.447353	0.628013	1.5925	2.57452	2.43159	3.34123	3.21245	3.09784
2.77667	0.158887	0.082245	0.160721	0.694155	0.448197	0.630257	1.59456	2.57717	2.43246	3.34432	3.21372	3.09343
2.78	0.161771	0.083465	0.162678	0.68941	0.449387	0.631396	1.5977	2.57869	2.43673	3.34809	3.21586	3.0959
2.78333	0.1596	0.08282	0.161537	0.696564	0.451337	0.632721	1.59612	2.57966	2.43383	3.3492	3.21632	3.09323
2.78667	0.159378	0.084461	0.157956	0.693791	0.453425	0.633608	1.59681	2.5804	2.43609	3.34595	3.21593	3.092
2.79	0.154282	0.085251	0.158365	0.698112	0.452209	0.632484	1.60359	2.58146	2.43764	3.35438	3.21528	3.09347
2.79333	0.158038	0.08445	0.160452	0.691895	0.455197	0.63388	1.59626	2.58275	2.43487	3.34727	3.21511	3.0963
2.79667	0.156575	0.084476	0.156564	0.697821	0.455949	0.636431	1.60238	2.58203	2.43811	3.34885	3.21487	3.09357
2.8	0.161908	0.08403	0.157325	0.703514	0.455729	0.636276	1.60312	2.5827	2.43938	3.35324	3.21674	3.09809
2.80333	0.162382	0.084406	0.159297	0.701922	0.456601	0.638999	1.59997	2.58493	2.43751	3.3511	3.21608	3.09767
2.80667	0.158068	0.082698	0.160233	0.697622	0.458888	0.640221	1.60481	2.58469	2.44165	3.35744	3.21853	3.09741
2.81	0.157195	0.083035	0.158517	0.703878	0.456868	0.642418	1.60552	2.58505	2.44326	3.3535	3.22016	3.09687
2.81333	0.161944	0.081644	0.159879	0.706432	0.457132	0.643765	1.60274	2.58741	2.44193	3.35157	3.21903	3.10042
2.81667	0.160292	0.083244	0.162118	0.700802	0.458733	0.647425	1.60662	2.58914	2.44498	3.34949	3.21895	3.10019
2.82	0.162129	0.08141	0.162759	0.707717	0.460183	0.646432	1.61116	2.58973	2.44576	3.34641	3.21976	3.10203
2.82333	0.164189	0.082385	0.163174	0.703975	0.460055	0.649527	1.60942	2.59192	2.44443	3.3475	3.21976	3.10136
2.82667	0.158194	0.083215	0.163199	0.711612	0.463337	0.650506	1.61423	2.59343	2.44888	3.35656	3.22055	3.10453
2.83	0.165548	0.085422	0.165575	0.703476	0.464556	0.651675	1.61327	2.59397	2.44725	3.35759	3.22356	3.10233
2.83333	0.16329	0.083665	0.164227	0.708716	0.466196	0.650952	1.61582	2.5942	2.44884	3.35099	3.22437	3.10301
2.83667	0.165895	0.083816	0.163203	0.714557	0.467939	0.654366	1.61483	2.59586	2.45325	3.35608	3.22416	3.10113
2.84	0.164363	0.085779	0.162335	0.710116	0.469951	0.655473	1.6146	2.59539	2.45354	3.36076	3.22526	3.10466
2.84333	0.161301	0.084878	0.161431	0.713246	0.470724	0.657878	1.61492	2.59668	2.45311	3.35049	3.22483	3.10407
2.84667	0.159166	0.083711	0.159986	0.716679	0.471618	0.659231	1.62045	2.59845	2.45753	3.3546	3.22331	3.10518
2.85	0.157507	0.084037	0.160809	0.715246	0.472062	0.660277	1.61975	2.60057	2.45573	3.355	3.22365	3.1048
2.85333	0.158531	0.086493	0.161558	0.712074	0.471877	0.662418	1.61904	2.59988	2.45462	3.35714	3.22609	3.10753
2.85667	0.163013	0.085415	0.164709	0.721192	0.472539	0.664517	1.62334	2.60218	2.45766	3.35387	3.22701	3.10573
2.86	0.163475	0.086818	0.166145	0.72177	0.474903	0.66532	1.62208	2.60207	2.4567	3.35605	3.22602	3.10748
2.86333	0.164402	0.086698	0.166247	0.722757	0.4759	0.666609	1.6292	2.60296	2.45735	3.3532	3.22834	3.10882
2.86667	0.169894	0.08854	0.168268	0.724404	0.475841	0.668565	1.62528	2.60343	2.46063	3.35397	3.22926	3.11042
2.87	0.164563	0.086793	0.168919	0.724549	0.478784	0.668446	1.62553	2.60506	2.45938	3.35091	3.229	3.10884
2.87333	0.16385	0.08725	0.167011	0.726154	0.478869	0.666731	1.63173	2.60631	2.4595	3.35918	3.2295	3.11196
2.87667	0.164205	0.087452	0.166791	0.730711	0.479971	0.662497	1.63057	2.60871	2.46262	3.35929	3.23064	3.11157
2.88	0.171828	0.088621	0.168318	0.721005	0.481975	0.659129	1.63119	2.60834	2.46001	3.35498	3.23065	3.11232
2.88333	0.16847	0.086653	0.166937	0.72518	0.484161	0.65701	1.63036	2.60991	2.45938	3.35854	3.23066	3.11181
2.88667	0.164501	0.087966	0.165878	0.729165	0.486044	0.654901	1.63601	2.61124	2.46363	3.35435	3.23102	3.11544
2.89	0.161451	0.087502	0.166234	0.729374	0.486745	0.652735	1.63434	2.61188	2.46102	3.36059	3.23169	3.1136
2.89333	0.169396	0.087598	0.165971	0.728334	0.487765	0.653969	1.63436	2.61115	2.46184	3.35775	3.23057	3.11298
2.89667	0.162519	0.086449	0.163957	0.730731	0.488736	0.654528	1.6454	2.61362	2.46543	3.3587	3.23071	3.1127
2.9	0.163641	0.087799	0.164869	0.732097	0.489137	0.655324	1.64303	2.61396	2.46477	3.36022	3.23135	3.11563
2.90333	0.163082	0.085885	0.165967	0.734441	0.487769	0.6555	1.64105	2.61415	2.46495	3.36563	3.23163	3.11576
2.90667	0.166334	0.086952	0.168148	0.738989	0.491664	0.656524	1.64222	2.61457	2.46917	3.35995	3.2324	3.11745
2.91	0.160665	0.08836	0.168438	0.742479	0.492063	0.657783	1.64083	2.61589	2.46725	3.36163	3.23527	3.12059
2.91333	0.161118	0.0902	0.171451	0.734742	0.490988	0.658781	1.64959	2.61586	2.46941	3.36009	3.23688	3.12289
2.91667	0.166796	0.090211	0.17301	0.740262	0.491162	0.659683	1.6502	2.6176	2.47381	3.3662	3.23707	3.12162
2.92	0.16549	0.091972	0.171046	0.737101	0.494107	0.66191	1.64698	2.62004	2.47228	3.35922	3.23764	3.12014
2.92333	0.163114	0.091868	0.170894	0.73786	0.492732	0.662118	1.647	2.62042	2.47282	3.35822	3.238	3.12102
2.92667	0.163805	0.089911	0.170339	0.744184	0.492103	0.664521	1.64865	2.6216	2.47469	3.36396	3.23811	3.12104
2.93	0.171968	0.090519	0.169019	0.750321	0.491724	0.669587	1.64769	2.62221	2.4721	3.3621	3.23943	3.11773
2.93333	0.162373	0.090985	0.168756	0.74466	0.493374	0.670062	1.64626	2.6217	2.47247	3.36659	3.24005	3.12037
2.93667	0.164649	0.091074	0.16836	0.742482	0.494036	0.669872	1.65516	2.62237	2.47436	3.36212	3.24112	3.12144
2.94	0.161984	0.089462	0.16834	0.75135	0.4951	0.671035	1.6564	2.62349	2.47308	3.36647	3.24134	3.12328
2.94333	0.167149	0.090306	0.170599	0.745874	0.494216	0.667723	1.6592	2.62489	2.47703	3.36547	3.24396	3.12218
2.94667	0.16667	0.08866	0.169398	0.747612	0.497634	0.663491	1.65682	2.62625	2.47871	3.36249	3.24389	3.12395
2.95	0.158107	0.088953	0.168689	0.757596	0.498802	0.663815	1.65491	2.62651	2.47618	3.36424	3.24456	3.12246
2.95333	0.167044	0.088307	0.170656	0.756568	0.499743	0.664374	1.66119	2.62623	2.47982	3.36115	3.24538	3.12177
2.95667	0.162262	0.089614	0.170391	0.753927	0.500757	0.666163	1.65691	2.62744	2.48218	3.36344	3.2451	3.11924
2.96	0.165648	0.089528	0.173487	0.76119	0.504743	0.675042	1.66335	2.62863	2.48022	3.36619	3.24374	3.11844
2.96333	0.167204	0.090245	0.172973	0.755516	0.506085	0.68557	1.65958	2.62948	2.48433	3.36049	3.24296	3.12011
2.96667	0.165951	0.088761	0.175274	0.759085	0.507246	0.690074	1.65817	2.63291	2.48495	3.36807	3.24158	3.12001
2.97	0.169117	0.090077	0.175425	0.758503	0.506365	0.690451	1.66501	2.63394	2.48243	3.36873	3.24091	3.11992
2.97333	0.163216	0.09005	0.174239	0.758046	0.507877	0.69584	1.66098	2.63526	2.48527	3.3702	3.24325	3.11984
2.97667	0.163271	0.088286	0.17096	0.761184	0.509966	0.700271	1.66475	2.63595	2.4853	3.36865	3.2443	3.12224
2.98	0.172082	0.087648	0.17286	0.761958	0.511807	0.703421	1.66358	2.63605	2.48346	3.36672	3.24574	3.1219
2.98333	0.168496	0.09078	0.17252	0.757327	0.512325	0.70202	1.66947	2.63495	2.48749	3.36355	3.24715	3.12376
2.98667	0.174912	0.089182	0.172041	0.761265	0.514095	0.700966	1.66816	2.63657	2.4883	3.37042	3.24993	3.12513
2.99	0.176064	0.089207	0.172122	0.764066	0.515663	0.697624	1.67172	2.6376	2.48629	3.36353	3.24765	3.12529
2.99333	0.168723	0.091858	0.173587	0.763492	0.512385	0.692331	1.66809	2.63839	2.48979	3.36817	3.24852	3.12191
2.99667	0.170671	0.093738	0.171927	0.770374	0.512877	0.686743	1.67484	2.64142	2.49055	3.3704	3.24912	3.1241
3	0.167821	0.092631	0.171006	0.771707	0.514913	0.688228	1.67447	2.64305	2.4893	3.36568	3.25041	3.12436
3.00333	0.173686	0.093964	0.172901	0.764958	0.517706	0.693479	1.67505	2.64319	2.49294	3.37058	3.24793	3.12433
3.00667	0.166195	0.094782	0.172059	0.769886	0.518875	0.693632	1.6764	2.64352	2.49472	3.37426	3.2514	3.12615
3.01	0.169847	0.092818	0.172516	0.776159	0.522667	0.692157	1.67498	2.64493	2.49232	3.36748	3.25229	3.12956
3.01333	0.167075	0.09106	0.173147	0.774708	0.523726	0.692857	1.68207	2.64553	2.49579	3.36857	3.25064	3.12595
3.01667	0.171404	0.090878	0.172744	0.772634	0.522398	0.692617	1.68579	2.64529	2.49652	3.369	3.25383	3.12719
3.02	0.174358	0.090503	0.172615	0.778598	0.523728	0.694165	1.68358	2.64702	2.49462	3.37161	3.25677	3.12881
3.02333	0.172808	0.089538	0.174063	0.779333	0.523819	0.703383	1.68436	2.64783	2.49698	3.36328	3.25521	3.12903
3.02667	0.174849	0.091691	0.173604	0.76918	0.526274	0.702846	1.68285	2.64804	2.49989	3.37182	3.25649	3.12995
3.03	0.167888	0.092405	0.177291	0.777576	0.527291	0.702442	1.67976	2.6488	2.49775	3.37053	3.25978	3.13386
3.03333	0.171666	0.091673	0.176562	0.781316	0.532389	0.705121	1.6885	2.65002	2.5012	3.37246	3.25912	3.13205
3.03667	0.175763	0.091598	0.175459	0.78544	0.532896	0.704401	1.6867	2.6495	2.5034	3.37245	3.25987	3.13453
3.04	0.17475	0.093058	0.17586	0.785734	0.533869	0.700031	1.68699	2.65052	2.50043	3.37122	3.26019	3.13355
3.04333	0.170184	0.092037	0.174495	0.782368	0.534472	0.705449	1.68538	2.65267	2.50142	3.36887	3.25987	3.13442
3.04667	0.172546	0.093237	0.172583	0.785607	0.535496	0.707907	1.68778	2.65334	2.50376	3.37242	3.25866	3.13298
3.05	0.170648	0.093522	0.173408	0.788788	0.534443	0.709356	1.69974	2.65331	2.50129	3.3739	3.25799	3.13429
3.05333	0.170594	0.09552	0.175789	0.793148	0.533803	0.713636	1.69648	2.65472	2.50276	3.37051	3.25791	3.13159
3.05667	0.171761	0.0936	0.176978	0.782013	0.53724	0.716227	1.69398	2.65372	2.50554	3.3669	3.25815	3.13212
3.06	0.17381	0.094327	0.176448	0.790218	0.53899	0.719188	1.6904	2.65416	2.50405	3.36931	3.25705	3.13267
3.06333	0.172105	0.093849	0.176242	0.787249	0.540436	0.723732	1.6949	2.65471	2.50564	3.37162	3.2598	3.1345
3.06667	0.176604	0.093865	0.177394	0.787325	0.542125	0.726589	1.7009	2.65644	2.50735	3.37665	3.25944	3.13261
3.07	0.169474	0.091496	0.176907	0.788401	0.543593	0.729576	1.70163	2.65619	2.50403	3.3825	3.2601	3.13416
3.07333	0.179024	0.093929	0.176951	0.796428	0.54166	0.733158	1.69971	2.6596	2.50589	3.37803	3.26259	3.13484
3.07667	0.176019	0.094047	0.177924	0.792302	0.541906	0.734579	1.696	2.6605	2.50939	3.37356	3.26327	3.13321
3.08	0.173198	0.094295	0.181198	0.793224	0.542862	0.73679	1.70504	2.66075	2.50563	3.37286	3.26186	3.13296
3.08333	0.172676	0.094469	0.18034	0.795338	0.545965	0.739993	1.70442	2.66047	2.50742	3.37817	3.26378	3.13466
3.08667	0.174705	0.096999	0.179068	0.806235	0.544799	0.742768	1.69767	2.66123	2.51308	3.37963	3.26395	3.13609
3.09	0.171596	0.095194	0.179462	0.798477	0.547469	0.743489	1.70834	2.66114	2.51115	3.37159	3.262	3.13625
3.09333	0.170086	0.094211	0.180007	0.809122	0.547395	0.744925	1.7008	2.66022	2.51005	3.37614	3.26427	3.13767
3.09667	0.171754	0.093952	0.177511	0.801617	0.548299	0.747052	1.7104	2.66166	2.51647	3.37624	3.26586	3.13543
3.1	0.173655	0.095494	0.178942	0.803192	0.544934	0.749034	1.70509	2.66461	2.51478	3.37466	3.26676	3.13406
3.10333	0.175233	0.094412	0.180993	0.804617	0.547594	0.749252	1.70889	2.66589	2.51147	3.37727	3.26645	3.13364
3.10667	0.172491	0.094522	0.182802	0.803061	0.551217	0.751355	1.70962	2.66542	2.51471	3.36806	3.26904	3.13245
3.11	0.177414	0.095898	0.184194	0.808323	0.55253	0.757209	1.71546	2.66744	2.51516	3.37595	3.26988	3.12989
3.11333	0.174184	0.097503	0.185508	0.81031	0.552988	0.755675	1.71475	2.66843	2.51231	3.37749	3.26953	3.13219
3.11667	0.177556	0.09682	0.186235	0.810879	0.554972	0.757358	1.71674	2.6682	2.51588	3.37471	3.26896	3.13325
3.12	0.171048	0.097002	0.184627	0.805039	0.557438	0.758395	1.71331	2.66873	2.51825	3.37441	3.27108	3.13233
3.12333	0.172998	0.099109	0.183001	0.814299	0.555746	0.759511	1.71852	2.66983	2.51571	3.3763	3.27047	3.13516
3.12667	0.174134	0.097827	0.181501	0.806475	0.557981	0.756638	1.71093	2.67125	2.51804	3.37354	3.26873	3.13749
3.13	0.178493	0.095999	0.179563	0.812456	0.558951	0.758651	1.7207	2.67252	2.52157	3.37861	3.27054	3.13941
3.13333	0.174176	0.096242	0.180902	0.814503	0.560393	0.7593	1.72137	2.67315	2.51962	3.37718	3.26855	3.14158
3.13667	0.174733	0.096309	0.180295	0.815781	0.560143	0.760863	1.72017	2.67377	2.52085	3.37717	3.26957	3.14257
3.14	0.175284	0.094354	0.179822	0.818027	0.562228	0.762836	1.71952	2.67599	2.52577	3.37768	3.271	3.14506
3.14333	0.169525	0.096075	0.180637	0.81844	0.562998	0.765533	1.71919	2.67659	2.52517	3.38329	3.272	3.14446
3.14667	0.176128	0.09782	0.180974	0.816574	0.565515	0.769479	1.72489	2.67576	2.52355	3.38149	3.27182	3.14231
3.15	0.175333	0.096954	0.179056	0.824441	0.56772	0.771273	1.72394	2.67632	2.52736	3.37452	3.27616	3.14197
3.15333	0.177518	0.097306	0.181041	0.823444	0.570042	0.774701	1.72532	2.67933	2.52752	3.37993	3.27437	3.14325
3.15667	0.172015	0.098993	0.181026	0.824679	0.569874	0.77648	1.72943	2.68021	2.52458	3.3785	3.27549	3.14042
3.16	0.174168	0.097841	0.184762	0.817925	0.573308	0.777561	1.72576	2.68058	2.52719	3.37869	3.27655	3.14284
3.16333	0.178099	0.096335	0.184514	0.825992	0.573697	0.779403	1.72559	2.68203	2.52883	3.38474	3.27628	3.14396
3.16667	0.175222	0.097296	0.186692	0.81871	0.574016	0.781773	1.72873	2.68249	2.52575	3.38123	3.27552	3.14581
3.17	0.174007	0.096518	0.189169	0.826004	0.576234	0.782882	1.73149	2.68293	2.52733	3.3762	3.27738	3.14443
3.17333	0.1741	0.09658	0.187717	0.828418	0.5782	0.786075	1.73171	2.68341	2.53124	3.3797	3.27661	3.14428
3.17667	0.173231	0.098775	0.185188	0.82609	0.576642	0.788778	1.72865	2.68284	2.52834	3.3794	3.27701	3.14338
3.18	0.179321	0.099964	0.187735	0.833485	0.577952	0.790715	1.73396	2.68409	2.52869	3.38112	3.27854	3.14425
3.18333	0.176783	0.098343	0.184794	0.83441	0.578629	0.792845	1.73378	2.68609	2.53352	3.38265	3.28004	3.14557
3.18667	0.175174	0.098438	0.181989	0.834129	0.578408	0.796176	1.73501	2.68743	2.53268	3.37746	3.27982	3.14646
3.19	0.172046	0.098944	0.182834	0.833112	0.579128	0.795909	1.73488	2.6877	2.53019	3.38162	3.28069	3.14875
3.19333	0.183781	0.097252	0.183033	0.833235	0.580959	0.799296	1.73541	2.68902	2.53408	3.37744	3.28295	3.15046
3.19667	0.17398	0.095338	0.181298	0.833731	0.581311	0.799065	1.73951	2.68945	2.5333	3.37852	3.28178	3.15331
3.2	0.181765	0.09718	0.181137	0.832644	0.583425	0.80062	1.73823	2.6924	2.52969	3.38052	3.28251	3.1513
3.20333	0.17354	0.097685	0.182844	0.841949	0.583569	0.799469	1.73305	2.69166	2.5311	3.38428	3.28429	3.1522
3.20667	0.177009	0.096631	0.184153	0.838993	0.584177	0.801199	1.73875	2.69269	2.53452	3.38192	3.28326	3.15237
3.21	0.17951	0.099207	0.183512	0.843521	0.583628	0.801845	1.73627	2.69439	2.53188	3.38242	3.28368	3.1523
3.21333	0.181681	0.101483	0.18494	0.841399	0.584175	0.803839	1.74542	2.69694	2.53487	3.38341	3.28495	3.15271
3.21667	0.173558	0.100858	0.187343	0.83587	0.586758	0.805836	1.74862	2.69608	2.53933	3.38642	3.28478	3.15219
3.22	0.175565	0.101799	0.188256	0.845484	0.588501	0.807969	1.75139	2.69639	2.53858	3.3844	3.28464	3.15472
3.22333	0.179281	0.102926	0.190148	0.84697	0.590861	0.811051	1.74471	2.69648	2.53607	3.3845	3.28656	3.15518
3.22667	0.182899	0.101182	0.190225	0.842804	0.590581	0.813268	1.74911	2.69732	2.54061	3.3844	3.28449	3.15761
3.23	0.178946	0.10002	0.192288	0.843724	0.591808	0.816435	1.74843	2.69805	2.53982	3.38352	3.2872	3.15706
3.23333	0.181392	0.100351	0.190437	0.846255	0.590222	0.816446	1.74659	2.69812	2.53752	3.38545	3.28561	3.15877
3.23667	0.178627	0.100112	0.188173	0.850319	0.588346	0.818344	1.75588	2.69862	2.54085	3.37673	3.28842	3.1582
3.24	0.178463	0.098962	0.186498	0.853016	0.585674	0.819707	1.75568	2.69925	2.54425	3.387	3.28771	3.15733
3.24333	0.18389	0.100401	0.18622	0.853078	0.587631	0.820486	1.7568	2.70017	2.54088	3.38151	3.29018	3.15778
3.24667	0.179322	0.100858	0.184105	0.852498	0.58949	0.820012	1.74853	2.7004	2.54381	3.38315	3.29039	3.15799
3.25	0.180388	0.102229	0.183428	0.853954	0.59109	0.824774	1.75855	2.70147	2.54636	3.38376	3.29265	3.15834
3.25333	0.179184	0.103167	0.183968	0.85967	0.592101	0.826765	1.75373	2.70264	2.5441	3.38276	3.29203	3.15789
3.25667	0.17684	0.104478	0.187645	0.858825	0.596384	0.827872	1.76051	2.7041	2.544	3.38693	3.29482	3.16001
3.26	0.179089	0.103334	0.189951	0.858004	0.598561	0.829043	1.75605	2.70455	2.54728	3.38767	3.29462	3.16061
3.26333	0.178076	0.103473	0.190621	0.861263	0.598504	0.832387	1.75593	2.70534	2.54562	3.38647	3.2948	3.15876
3.26667	0.183778	0.102874	0.194834	0.862684	0.60003	0.832146	1.75948	2.70626	2.5444	3.38649	3.29492	3.15992
3.27	0.181682	0.102898	0.193674	0.855854	0.602229	0.833723	1.76125	2.70713	2.54727	3.38878	3.29414	3.16221
3.27333	0.181065	0.101531	0.192317	0.861719	0.602922	0.836662	1.76696	2.70881	2.54906	3.38587	3.29444	3.16341
3.27667	0.178532	0.102533	0.191122	0.865219	0.601915	0.838695	1.7667	2.70843	2.54846	3.38506	3.29469	3.16005
3.28	0.178824	0.102785	0.190489	0.869293	0.603505	0.840768	1.77298	2.70784	2.55067	3.38715	3.29375	3.1607
3.28333	0.186623	0.102224	0.190924	0.869791	0.603586	0.841515	1.76545	2.70752	2.5547	3.38479	3.29329	3.16318
3.28667	0.183148	0.101433	0.191199	0.863738	0.606672	0.842982	1.76308	2.70828	2.55338	3.38659	3.29347	3.16095
3.29	0.178535	0.104129	0.189358	0.868888	0.608062	0.845702	1.76447	2.70851	2.55175	3.38875	3.29248	3.1584
3.29333	0.185832	0.102401	0.191201	0.874327	0.610967	0.847226	1.76933	2.71026	2.55467	3.3805	3.29244	3.15987
3.29667	0.178489	0.10351	0.191165	0.868193	0.611317	0.849721	1.76693	2.71248	2.55449	3.38443	3.29398	3.16015
3.3	0.18665	0.104545	0.190119	0.868697	0.614382	0.852386	1.77187	2.71363	2.55092	3.38952	3.29799	3.15768
3.30333	0.1799	0.104729	0.192413	0.876357	0.612516	0.855267	1.7699	2.71516	2.55422	3.39035	3.29949	3.15954
3.30667	0.182607	0.102823	0.193784	0.871841	0.611398	0.853923	1.77202	2.71659	2.55739	3.39316	3.29957	3.16359
3.31	0.18137	0.104065	0.19584	0.880277	0.612205	0.856741	1.77218	2.71843	2.55527	3.39279	3.30146	3.16395
3.31333	0.184449	0.103608	0.195338	0.878425	0.613303	0.857472	1.77565	2.71862	2.55565	3.38986	3.30139	3.16584
3.31667	0.176063	0.103755	0.196376	0.88134	0.611242	0.859163	1.77669	2.71856	2.5602	3.39112	3.29864	3.16739
3.32	0.18287	0.102629	0.198094	0.875136	0.61444	0.859656	1.77415	2.71746	2.55898	3.38795	3.29907	3.16735
3.32333	0.180573	0.10428	0.195696	0.883122	0.616862	0.861966	1.77435	2.71856	2.55644	3.39201	3.30145	3.16559
3.32667	0.184418	0.103094	0.193431	0.885221	0.616316	0.86158	1.76847	2.71814	2.56006	3.38732	3.30198	3.1668
3.33	0.1865	0.102126	0.19595	0.880185	0.6186	0.863101	1.78017	2.71984	2.56082	3.39264	3.30229	3.17056
3.33333	0.182045	0.101675	0.193118	0.880454	0.62233	0.864753	1.77896	2.72107	2.55791	3.38833	3.30353	3.17061
3.33667	0.185872	0.103672	0.191397	0.883136	0.621782	0.867672	1.78039	2.72196	2.56045	3.39032	3.30433	3.17121
3.34	0.183601	0.102495	0.192456	0.884081	0.624179	0.870423	1.78266	2.71968	2.56423	3.39428	3.3019	3.17003
3.34333	0.178947	0.104046	0.192308	0.889508	0.62701	0.872413	1.78328	2.72092	2.56126	3.39109	3.30135	3.16867
3.34667	0.185501	0.104198	0.194122	0.890792	0.629148	0.874996	1.77836	2.72107	2.5625	3.38789	3.30146	3.16815
3.35	0.183135	0.104755	0.19401	0.891021	0.63002	0.877331	1.78368	2.72136	2.56709	3.39218	3.30112	3.16839
3.35333	0.182152	0.103795	0.194718	0.888461	0.632522	0.878364	1.78516	2.72227	2.56631	3.39538	3.30158	3.16821
3.35667	0.180892	0.104415	0.196063	0.89576	0.635134	0.879675	1.7839	2.72358	2.56232	3.38633	3.30345	3.16808
3.36	0.185721	0.102377	0.19598	0.891337	0.635809	0.883114	1.78422	2.72329	2.56482	3.391	3.3045	3.16956
3.36333	0.182598	0.103435	0.194694	0.90237	0.635118	0.884982	1.7874	2.72459	2.56722	3.39001	3.30528	3.16896
3.36667	0.189951	0.103801	0.197336	0.893753	0.63707	0.887322	1.78816	2.72601	2.56332	3.39568	3.30755	3.16799
3.37	0.182411	0.104874	0.198089	0.897872	0.638434	0.889938	1.79143	2.72662	2.56303	3.39193	3.30724	3.16805
3.37333	0.18375	0.104926	0.19946	0.8939	0.638752	0.892558	1.79506	2.72721	2.5685	3.39086	3.30754	3.17077
3.37667	0.18885	0.107151	0.198635	0.898905	0.642342	0.89458	1.79246	2.72855	2.56857	3.39044	3.30745	3.16938
3.38	0.19034	0.10692	0.19944	0.899768	0.643324	0.895782	1.7927	2.72778	2.56532	3.39172	3.3087	3.16798
3.38333	0.180784	0.106736	0.198606	0.895382	0.642818	0.896947	1.79972	2.72864	2.56973	3.3942	3.30635	3.17011
3.38667	0.192407	0.106134	0.197383	0.903735	0.644579	0.898682	1.79425	2.73095	2.57204	3.39194	3.30978	3.17241
3.39	0.187674	0.107445	0.196878	0.91098	0.643523	0.901075	1.79413	2.73268	2.56888	3.39068	3.31151	3.17202
3.39333	0.189375	0.105955	0.19821	0.902528	0.64344	0.903673	1.79382	2.73273	2.56981	3.39466	3.31058	3.17463
3.39667	0.191208	0.106058	0.196582	0.906948	0.645731	0.906693	1.79882	2.7336	2.57396	3.39534	3.31039	3.17773
3.4	0.189472	0.106744	0.19768	0.912035	0.646584	0.907803	1.79693	2.73398	2.57265	3.39536	3.31213	3.17758
3.40333	0.190161	0.108018	0.197717	0.911624	0.646684	0.909778	1.79663	2.73443	2.57076	3.39873	3.30929	3.17799
3.40667	0.189686	0.105834	0.199253	0.904616	0.649548	0.910607	1.79797	2.73554	2.5756	3.39356	3.30914	3.17814
3.41	0.188386	0.108044	0.200822	0.907058	0.649806	0.910436	1.79689	2.73541	2.57625	3.39611	3.31168	3.17871
3.41333	0.187861	0.10965	0.201397	0.915243	0.649251	0.911624	1.79995	2.73644	2.57302	3.39375	3.31076	3.17781
3.41667	0.186331	0.10944	0.202261	0.919052	0.651327	0.913455	1.80125	2.73619	2.57454	3.39676	3.31082	3.17716
3.42	0.189793	0.109258	0.205189	0.920999	0.652158	0.915399	1.8057	2.7381	2.57769	3.39294	3.31233	3.17596
3.42333	0.188866	0.110549	0.203149	0.919335	0.652986	0.916845	1.80427	2.73865	2.57365	3.40006	3.3138	3.17462
3.42667	0.186176	0.109081	0.203813	0.919532	0.652738	0.919793	1.80503	2.74075	2.57359	3.39163	3.3152	3.17585
3.43	0.188118	0.107234	0.204677	0.92191	0.654716	0.922935	1.80761	2.74269	2.5786	3.38856	3.3181	3.17478
3.43333	0.193911	0.107618	0.203493	0.916349	0.654501	0.925275	1.80569	2.74411	2.57679	3.39498	3.32	3.17687
3.43667	0.188456	0.107572	0.204335	0.922384	0.655615	0.926551	1.80476	2.74224	2.57425	3.39701	3.31912	3.17924
3.44	0.191628	0.107039	0.20373	0.919359	0.658237	0.928052	1.81262	2.74301	2.57898	3.39752	3.31925	3.18019
3.44333	0.184573	0.108584	0.201728	0.925525	0.662185	0.928169	1.80703	2.74341	2.5813	3.39426	3.31967	3.17616
3.44667	0.188618	0.109088	0.201561	0.93066	0.662649	0.929445	1.81589	2.74418	2.57746	3.39501	3.31922	3.17631
3.45	0.18824	0.108869	0.201646	0.920807	0.665941	0.931734	1.81521	2.74493	2.57853	3.39317	3.31776	3.17382
3.45333	0.18205	0.108837	0.198264	0.931038	0.666079	0.935425	1.81078	2.74578	2.58245	3.39778	3.32007	3.17175
3.45667	0.187062	0.109868	0.200177	0.931216	0.665043	0.93896	1.8163	2.74518	2.58014	3.40139	3.31881	3.17162
3.46	0.18893	0.108945	0.200911	0.927078	0.664539	0.94276	1.81514	2.7469	2.57911	3.39706	3.31779	3.17499
3.46333	0.185759	0.109166	0.20094	0.931092	0.666793	0.944248	1.81209	2.74621	2.58444	3.39499	3.3191	3.17538
3.46667	0.187452	0.110775	0.203524	0.935887	0.666281	0.946151	1.81883	2.74849	2.58597	3.39733	3.32034	3.17754
3.47	0.187777	0.111671	0.205277	0.929898	0.668299	0.946649	1.81866	2.75072	2.58332	3.39658	3.3191	3.17797
3.47333	0.191001	0.110129	0.207915	0.940428	0.669107	0.947943	1.81613	2.75344	2.585	3.401	3.32188	3.18124
3.47667	0.190275	0.11182	0.209491	0.934486	0.6708	0.950269	1.81763	2.75316	2.58769	3.39535	3.32328	3.18271
3.48	0.185336	0.112571	0.209007	0.941915	0.671104	0.951532	1.81843	2.75446	2.58439	3.39792	3.32308	3.18168
3.48333	0.193977	0.110545	0.209916	0.943997	0.674438	0.951534	1.81561	2.75309	2.58487	3.40075	3.32489	3.18091
3.48667	0.190696	0.110035	0.209536	0.946511	0.676124	0.954409	1.82137	2.75301	2.58839	3.40017	3.32522	3.18274
3.49	0.190639	0.111322	0.206136	0.943793	0.678231	0.955048	1.82702	2.7527	2.58813	3.39298	3.32301	3.18085
3.49333	0.189271	0.10954	0.204487	0.94391	0.679409	0.955061	1.82656	2.7532	2.58441	3.39902	3.32255	3.18087
3.49667	0.187388	0.109036	0.204771	0.945054	0.679618	0.957478	1.8284	2.75515	2.58753	3.39716	3.32378	3.18299
3.5	0.191105	0.111057	0.203261	0.950693	0.679033	0.95894	1.8188	2.75747	2.58897	3.3964	3.32456	3.18299
3.50333	0.186974	0.110763	0.202777	0.9475	0.67968	0.960468	1.82658	2.75733	2.58662	3.39876	3.32479	3.18231
3.50667	0.190701	0.110724	0.203195	0.947224	0.68126	0.963924	1.82732	2.75677	2.58846	3.39856	3.32782	3.18418
3.51	0.195092	0.112003	0.204627	0.949142	0.683069	0.966054	1.83066	2.75699	2.59342	3.39838	3.32917	3.18419
3.51333	0.192779	0.111463	0.208031	0.953343	0.686011	0.967489	1.82521	2.75618	2.59176	3.40048	3.32614	3.18624
3.51667	0.191484	0.110001	0.206226	0.95364	0.689547	0.971032	1.83105	2.75593	2.59142	3.39697	3.32682	3.18658
3.52	0.195573	0.110669	0.20763	0.956227	0.69062	0.973349	1.83196	2.75768	2.59511	3.39886	3.32779	3.18558
3.52333	0.190099	0.110701	0.208132	0.958644	0.692405	0.97459	1.83135	2.75877	2.59493	3.40308	3.32677	3.18437
3.52667	0.193394	0.111086	0.209737	0.952722	0.693294	0.97758	1.82956	2.75892	2.59176	3.39619	3.32683	3.18562
3.53	0.188978	0.111217	0.209168	0.95973	0.692537	0.97995	1.83215	2.75848	2.59576	3.40339	3.3301	3.18473
3.53333	0.190553	0.112398	0.209795	0.960209	0.690153	0.983913	1.83061	2.75804	2.5971	3.40448	3.32857	3.18659
3.53667	0.192438	0.111869	0.209892	0.961661	0.691016	0.984795	1.83265	2.75902	2.59338	3.40745	3.33032	3.18831
3.54	0.19438	0.112755	0.212083	0.95851	0.689795	0.986199	1.83404	2.76002	2.59451	3.40266	3.33323	3.19071
3.54333	0.197955	0.11289	0.208862	0.963618	0.691572	0.988539	1.83475	2.76353	2.59808	3.4031	3.33244	3.19127
3.54667	0.188973	0.114153	0.207744	0.962654	0.693807	0.989693	1.84149	2.76532	2.59407	3.3981	3.33203	3.19232
3.55	0.194038	0.112703	0.210487	0.958992	0.695865	0.98929	1.83613	2.76542	2.59389	3.39752	3.33186	3.19034
3.55333	0.194016	0.113854	0.20993	0.966153	0.697745	0.992701	1.83895	2.76477	2.59837	3.39764	3.33126	3.19125
3.55667	0.189656	0.113314	0.208433	0.970185	0.699854	0.996119	1.84444	2.76511	2.59725	3.4015	3.32794	3.19118
3.56	0.194835	0.112854	0.210524	0.966941	0.701868	0.997059	1.84483	2.76382	2.59506	3.39582	3.32882	3.19021
3.56333	0.190645	0.112767	0.210754	0.971749	0.702146	0.998931	1.84102	2.76567	2.59807	3.39896	3.32887	3.19018
3.56667	0.197645	0.115276	0.209674	0.967049	0.70388	1.00098	1.8481	2.76906	2.5994	3.40496	3.3316	3.19378
3.57	0.193	0.113376	0.210115	0.966328	0.705755	1.00342	1.84322	2.77092	2.59748	3.39609	3.3325	3.19356
3.57333	0.191639	0.114555	0.212812	0.972871	0.706832	1.00456	1.84811	2.77125	2.59928	3.40514	3.33481	3.19524
3.57667	0.197948	0.114607	0.213854	0.975512	0.705296	1.00735	1.84336	2.7715	2.60322	3.39884	3.33584	3.19622
3.58	0.199461	0.114669	0.213154	0.974949	0.706858	1.00969	1.84545	2.77195	2.60266	3.405	3.33775	3.19697
3.58333	0.196939	0.11318	0.215723	0.978266	0.708388	1.01263	1.8472	2.76984	2.60028	3.4072	3.33778	3.19547
3.58667	0.198383	0.115358	0.217468	0.981695	0.707433	1.01295	1.85262	2.76932	2.60349	3.39656	3.33721	3.19722
3.59	0.19396	0.113713	0.215341	0.976952	0.706208	1.01683	1.84778	2.77088	2.60424	3.40645	3.33666	3.19548
3.59333	0.198377	0.114844	0.215739	0.980745	0.707335	1.01842	1.84996	2.77194	2.60182	3.40527	3.33875	3.19552
3.59667	0.188989	0.114893	0.216194	0.985741	0.711629	1.02101	1.84573	2.77156	2.60394	3.40483	3.33817	3.19682
3.6	0.193417	0.114894	0.215587	0.980187	0.710602	1.02192	1.84876	2.7737	2.60717	3.40483	3.33724	3.19533
3.60333	0.199009	0.114518	0.215803	0.985574	0.712489	1.02423	1.85078	2.77234	2.60629	3.40472	3.33734	3.19515
3.60667	0.189996	0.116262	0.215968	0.986371	0.716285	1.02348	1.85899	2.77283	2.60463	3.4053	3.3397	3.19574
3.61	0.195055	0.115418	0.215756	0.990454	0.718415	1.02523	1.85328	2.77259	2.60671	3.40142	3.33786	3.19419
3.61333	0.195978	0.116611	0.21656	0.989506	0.71726	1.0257	1.85064	2.77313	2.6078	3.40618	3.33891	3.19387
3.61667	0.198312	0.116742	0.214867	0.992688	0.719682	1.03029	1.85984	2.77341	2.60593	3.40323	3.34154	3.19405
3.62	0.19696	0.117041	0.213937	0.992673	0.719065	1.03136	1.85812	2.77631	2.60662	3.39921	3.34373	3.19491
3.62333	0.19969	0.115763	0.214281	0.998805	0.720037	1.035	1.8565	2.7769	2.60928	3.4021	3.34362	3.19392
3.62667	0.1999	0.11742	0.215347	0.992041	0.721349	1.03673	1.85801	2.77965	2.60782	3.40555	3.34508	3.19704
3.63	0.200967	0.118482	0.217619	0.996719	0.721363	1.03976	1.86309	2.78097	2.60622	3.4058	3.3469	3.19604
3.63333	0.193521	0.119346	0.21837	0.996081	0.721707	1.0415	1.86257	2.7812	2.61133	3.4051	3.34663	3.20024
3.63667	0.193476	0.119055	0.220821	1.00058	0.723949	1.0433	1.86233	2.78197	2.61172	3.4011	3.34533	3.19815
3.64	0.197504	0.12123	0.222144	1.00097	0.724298	1.0457	1.8534	2.7816	2.61022	3.40273	3.3467	3.20175
3.64333	0.197515	0.119903	0.220114	1.00138	0.72638	1.04849	1.86068	2.77912	2.61159	3.40306	3.34673	3.19972
3.64667	0.196422	0.117906	0.217353	1.00325	0.72802	1.05171	1.86186	2.77879	2.61482	3.40655	3.34536	3.20184
3.65	0.195533	0.11819	0.217989	1.00357	0.731388	1.05392	1.86098	2.77983	2.61151	3.40666	3.34649	3.20038
3.65333	0.19763	0.11774	0.217385	1.00516	0.73122	1.05764	1.86489	2.78053	2.61083	3.40617	3.3474	3.20281
3.65667	0.20045	0.117124	0.215821	1.00488	0.732595	1.06004	1.86365	2.78257	2.61464	3.40733	3.34762	3.20035
3.66	0.200879	0.118039	0.21618	1.01124	0.730907	1.0609	1.86244	2.78547	2.61562	3.40947	3.34803	3.20143
3.66333	0.197863	0.117809	0.21803	1.00546	0.730468	1.06318	1.86969	2.78653	2.61111	3.40571	3.34749	3.20066
3.66667	0.201417	0.116652	0.217438	1.01435	0.731843	1.06474	1.86832	2.7869	2.61372	3.40478	3.34723	3.20329
3.67	0.201513	0.117295	0.214344	1.01288	0.73438	1.0673	1.87091	2.78584	2.61638	3.41068	3.34712	3.20254
3.67333	0.198856	0.117664	0.216752	1.01738	0.735561	1.06943	1.86973	2.78638	2.61321	3.40814	3.34568	3.20379
3.67667	0.190585	0.118509	0.218366	1.01712	0.737087	1.07168	1.87396	2.78543	2.61334	3.39995	3.34517	3.20478
3.68	0.198982	0.119895	0.216952	1.01517	0.739066	1.07293	1.86946	2.7871	2.61959	3.41182	3.34511	3.20611
3.68333	0.198143	0.121092	0.217907	1.02209	0.739129	1.07392	1.87028	2.78816	2.61883	3.40314	3.3461	3.20326
3.68667	0.202098	0.121365	0.21984	1.01897	0.740977	1.07491	1.86959	2.79042	2.61779	3.41094	3.34574	3.20416
3.69	0.200773	0.121472	0.218933	1.02572	0.742665	1.07448	1.87258	2.79098	2.62026	3.40448	3.34563	3.20379
3.69333	0.199991	0.119589	0.220779	1.01618	0.743812	1.07707	1.87627	2.79179	2.62206	3.40338	3.34822	3.20245
3.69667	0.203864	0.119301	0.220648	1.02722	0.745691	1.07934	1.87289	2.79206	2.61952	3.40479	3.34971	3.20044
3.7	0.195852	0.118912	0.221121	1.01721	0.746879	1.082	1.88111	2.79322	2.61986	3.40487	3.34872	3.20159
3.70333	0.202696	0.119292	0.224854	1.02595	0.748295	1.08443	1.87671	2.79183	2.62295	3.4151	3.35147	3.20154
3.70667	0.202914	0.11781	0.22351	1.02278	0.748927	1.08876	1.87394	2.79066	2.62155	3.40467	3.35316	3.20336
3.71	0.195951	0.118445	0.221265	1.02451	0.751019	1.09019	1.87633	2.79112	2.62011	3.40948	3.35028	3.20495
3.71333	0.200649	0.118236	0.223907	1.03072	0.751305	1.0909	1.88165	2.79132	2.62391	3.40899	3.34969	3.20809
3.71667	0.201327	0.117995	0.222161	1.02558	0.75151	1.09316	1.88118	2.79164	2.62445	3.40467	3.34857	3.20811
3.72	0.199955	0.117203	0.218382	1.02995	0.75006	1.09478	1.87403	2.79457	2.62134	3.40677	3.34596	3.21113
3.72333	0.203633	0.118686	0.220904	1.03648	0.751425	1.09598	1.88389	2.79638	2.6252	3.40438	3.34443	3.20999
3.72667	0.201483	0.118805	0.221309	1.0323	0.75233	1.10073	1.8764	2.79724	2.62873	3.40742	3.34637	3.21349
3.73	0.202266	0.120356	0.222375	1.0343	0.753653	1.10424	1.88167	2.79852	2.62516	3.40922	3.34676	3.20912
3.73333	0.197875	0.121603	0.223382	1.04162	0.754425	1.10434	1.87419	2.79873	2.6265	3.41073	3.34904	3.21042
3.73667	0.193836	0.122881	0.225414	1.03986	0.757706	1.10579	1.88475	2.79687	2.62959	3.41507	3.35286	3.2068
3.74	0.201609	0.121848	0.226818	1.04015	0.757648	1.10737	1.88121	2.79742	2.62883	3.41045	3.35472	3.20945
3.74333	0.202498	0.123395	0.227382	1.04336	0.760197	1.10769	1.88461	2.79809	2.62527	3.41099	3.35567	3.20357
3.74667	0.206984	0.120933	0.225796	1.04604	0.762583	1.10943	1.88336	2.79727	2.63038	3.4089	3.35732	3.20843
3.75	0.202662	0.121239	0.229333	1.04553	0.765426	1.11443	1.88598	2.79874	2.63073	3.40753	3.35809	3.20843
3.75333	0.202005	0.121438	0.227822	1.0487	0.766422	1.1179	1.89051	2.80184	2.62915	3.41019	3.35649	3.21025
3.75667	0.202065	0.123213	0.225347	1.04599	0.769354	1.11989	1.88711	2.80224	2.62939	3.40653	3.35891	3.20691
3.76	0.202391	0.121905	0.225681	1.05092	0.769377	1.12233	1.89091	2.80385	2.63275	3.41105	3.35964	3.21118
3.76333	0.207613	0.125463	0.225338	1.04594	0.769955	1.12367	1.88713	2.80628	2.62918	3.41077	3.35856	3.20911
3.76667	0.206576	0.125407	0.223423	1.05231	0.769993	1.12234	1.88458	2.80544	2.62828	3.41682	3.35964	3.20889
3.77	0.19985	0.123623	0.226778	1.04977	0.77076	1.12292	1.88694	2.80613	2.63039	3.41242	3.36067	3.20843
3.77333	0.201428	0.122642	0.225349	1.05026	0.771662	1.12542	1.88825	2.80533	2.63031	3.41259	3.3593	3.20938
3.77667	0.212591	0.122245	0.224322	1.05305	0.772744	1.12613	1.88987	2.80392	2.62928	3.41383	3.36083	3.20649
3.78	0.206293	0.120599	0.225997	1.05561	0.772454	1.12758	1.89154	2.80248	2.63056	3.41076	3.3615	3.2095
3.78333	0.205856	0.120248	0.225522	1.05648	0.77314	1.13031	1.89487	2.80248	2.63273	3.40769	3.3617	3.21031
3.78667	0.204109	0.123424	0.223914	1.05628	0.774599	1.13257	1.89509	2.80322	2.6315	3.41443	3.36168	3.21408
3.79	0.201595	0.123952	0.227713	1.06273	0.775758	1.13471	1.89096	2.80695	2.63119	3.41476	3.3628	3.21472
3.79333	0.206786	0.124742	0.227635	1.06273	0.776579	1.13786	1.89602	2.80895	2.63417	3.4086	3.36263	3.21901
3.79667	0.19929	0.123815	0.227501	1.0612	0.780224	1.13991	1.89526	2.81037	2.63698	3.41259	3.36299	3.21786
3.8	0.200278	0.125336	0.228096	1.0608	0.783812	1.14348	1.8998	2.8114	2.63467	3.41298	3.3634	3.21928
3.80333	0.206007	0.123607	0.228804	1.06395	0.784739	1.14537	1.89322	2.8099	2.63671	3.41714	3.36447	3.21735
3.80667	0.213416	0.123767	0.229327	1.06681	0.785199	1.14874	1.89918	2.80829	2.64004	3.40884	3.36398	3.21925
3.81	0.2042	0.123996	0.232637	1.06948	0.786954	1.14963	1.90098	2.80939	2.63838	3.41632	3.36392	3.21879
3.81333	0.210339	0.126142	0.232096	1.06485	0.787014	1.15192	1.90095	2.80968	2.63625	3.41355	3.36448	3.21843
3.81667	0.20798	0.125731	0.233764	1.06909	0.786611	1.15279	1.90067	2.81175	2.64086	3.41213	3.36477	3.21718
3.82	0.208887	0.125096	0.234502	1.07781	0.789174	1.15761	1.89959	2.81387	2.63965	3.41275	3.36484	3.21838
3.82333	0.212323	0.124631	0.231832	1.07243	0.790918	1.15762	1.90178	2.81488	2.63668	3.4155	3.36532	3.21632
3.82667	0.207895	0.125193	0.230187	1.07375	0.792645	1.15952	1.90996	2.81452	2.63833	3.40593	3.36611	3.21631
3.83	0.205377	0.125117	0.231286	1.07788	0.793471	1.16159	1.89635	2.81597	2.63876	3.41159	3.36777	3.21737
3.83333	0.201678	0.123764	0.229441	1.07632	0.793561	1.16427	1.90429	2.81559	2.63576	3.41345	3.36834	3.21983
3.83667	0.207437	0.125424	0.227879	1.07988	0.794104	1.16558	1.90576	2.81447	2.63802	3.41459	3.36918	3.21928
3.84	0.209227	0.125718	0.229047	1.08303	0.79456	1.16929	1.91192	2.8152	2.64017	3.41276	3.36992	3.22339
3.84333	0.205094	0.124761	0.229955	1.08052	0.794791	1.17166	1.90536	2.81659	2.63742	3.4133	3.36926	3.22106
3.84667	0.201851	0.125273	0.230609	1.07695	0.797281	1.17649	1.90072	2.81691	2.63969	3.41499	3.36853	3.22116
3.85	0.207614	0.126979	0.231846	1.08753	0.801336	1.17647	1.91132	2.81739	2.64287	3.40908	3.36811	3.21886
3.85333	0.202321	0.125173	0.234024	1.0835	0.803259	1.17751	1.90721	2.81896	2.64101	3.41196	3.36694	3.21938
3.85667	0.203484	0.126518	0.236987	1.08931	0.804778	1.17899	1.90669	2.81958	2.64255	3.41595	3.36704	3.21651
3.86	0.209153	0.127456	0.240009	1.08506	0.80574	1.18394	1.91063	2.81987	2.64632	3.41551	3.36963	3.21855
3.86333	0.209748	0.126822	0.238287	1.08856	0.80556	1.18294	1.9064	2.81881	2.64366	3.41626	3.36945	3.21908
3.86667	0.206003	0.126915	0.239624	1.09049	0.804476	1.18964	1.90785	2.81988	2.64323	3.41271	3.37106	3.21806
3.87	0.204938	0.129202	0.241104	1.09084	0.80536	1.19308	1.91363	2.81993	2.64705	3.41262	3.37345	3.21854
3.87333	0.211582	0.127868	0.238914	1.09141	0.807677	1.1948	1.90796	2.82086	2.64496	3.40964	3.37353	3.2207
3.87667	0.204953	0.128947	0.235564	1.09335	0.810198	1.19381	1.91205	2.82193	2.64274	3.41109	3.37334	3.22205
3.88	0.209501	0.128941	0.238035	1.09269	0.811999	1.19866	1.91697	2.82472	2.64743	3.41244	3.37562	3.22193
3.88333	0.212924	0.128741	0.238621	1.09693	0.812338	1.19799	1.91734	2.82674	2.64565	3.41888	3.37378	3.22388
3.88667	0.204053	0.128307	0.236435	1.0896	0.813868	1.19785	1.91801	2.82771	2.64373	3.41355	3.37217	3.22444
3.89	0.206614	0.130249	0.237963	1.10411	0.813008	1.19996	1.91323	2.82612	2.64745	3.41606	3.37227	3.22361
3.89333	0.206829	0.129187	0.238037	1.10058	0.812904	1.20343	1.91759	2.82559	2.6487	3.41401	3.37128	3.22524
3.89667	0.210783	0.129552	0.23699	1.10077	0.813896	1.20308	1.91474	2.82569	2.64593	3.41633	3.37139	3.22553
3.9	0.201868	0.130366	0.235466	1.10394	0.815544	1.20538	1.92	2.82493	2.65029	3.41277	3.37249	3.22539
3.90333	0.210322	0.130468	0.234662	1.10417	0.815998	1.20816	1.9147	2.82544	2.64992	3.41477	3.37427	3.22401
3.90667	0.211694	0.129024	0.233689	1.10245	0.816092	1.21004	1.92049	2.82762	2.64716	3.4139	3.37485	3.22672
3.91	0.210357	0.130026	0.234996	1.10121	0.817608	1.2118	1.92091	2.82764	2.64923	3.41228	3.37514	3.22385
3.91333	0.212768	0.129214	0.235982	1.11111	0.81908	1.21447	1.92282	2.82545	2.65179	3.41801	3.37576	3.22501
3.91667	0.210403	0.128235	0.236016	1.11127	0.820921	1.21593	1.92074	2.82413	2.6475	3.42036	3.37717	3.22474
3.92	0.20498	0.128792	0.23895	1.11051	0.822463	1.21739	1.9228	2.82426	2.64955	3.41609	3.37686	3.22694
3.92333	0.213287	0.129004	0.239516	1.11199	0.824079	1.21889	1.92252	2.82567	2.6522	3.41226	3.37889	3.22355
3.92667	0.212385	0.128096	0.24026	1.11484	0.824536	1.22061	1.93012	2.82817	2.64952	3.41623	3.37778	3.22748
3.93	0.210245	0.129525	0.242566	1.11308	0.825498	1.2233	1.92317	2.83144	2.6477	3.41882	3.37688	3.22754
3.93333	0.211295	0.130017	0.243098	1.11696	0.827524	1.22671	1.93159	2.83412	2.65277	3.41779	3.37669	3.22927
3.93667	0.206238	0.129541	0.243234	1.11716	0.828898	1.22844	1.92419	2.83451	2.6511	3.41774	3.37789	3.22794
3.94	0.212339	0.130063	0.245547	1.12032	0.831663	1.23135	1.92293	2.83505	2.65004	3.41894	3.37656	3.23104
3.94333	0.209592	0.130127	0.244131	1.1234	0.832297	1.23407	1.93296	2.83381	2.6549	3.41948	3.37924	3.22856
3.94667	0.206338	0.129959	0.241517	1.11976	0.832997	1.23551	1.92613	2.8332	2.65735	3.41934	3.3809	3.2296
3.95	0.213603	0.130219	0.244434	1.12199	0.833553	1.23663	1.92553	2.83199	2.65257	3.41741	3.38175	3.23024
3.95333	0.20303	0.131593	0.243952	1.12383	0.833981	1.23886	1.92886	2.83492	2.65721	3.41937	3.381	3.23261
3.95667	0.207643	0.131905	0.240995	1.12417	0.835214	1.2411	1.9299	2.83509	2.65826	3.41833	3.38234	3.23083
3.96	0.21046	0.132482	0.241589	1.13354	0.838466	1.24166	1.92534	2.83701	2.65455	3.41628	3.38106	3.23336
3.96333	0.210244	0.131583	0.241492	1.12494	0.840532	1.2435	1.93336	2.83846	2.65425	3.42133	3.38158	3.23256
3.96667	0.214723	0.132475	0.239904	1.13429	0.841208	1.24508	1.92922	2.84093	2.65991	3.42388	3.38149	3.23224
3.97	0.208434	0.131403	0.238773	1.13676	0.842074	1.24832	1.9356	2.83986	2.6569	3.4151	3.38317	3.23274
3.97333	0.215099	0.13143	0.241306	1.13114	0.843854	1.25045	1.93304	2.83868	2.65937	3.41669	3.38445	3.23512
3.97667	0.214443	0.130488	0.241465	1.12884	0.845165	1.25428	1.93267	2.83789	2.66352	3.41757	3.38547	3.23407
3.98	0.213484	0.131411	0.243434	1.12871	0.84814	1.25772	1.93394	2.83861	2.66194	3.41601	3.38436	3.2371
3.98333	0.20802	0.130949	0.244148	1.13675	0.851568	1.26094	1.93731	2.83809	2.66108	3.42033	3.38629	3.23862
3.98667	0.211467	0.131981	0.24423	1.13805	0.85486	1.26355	1.93382	2.83858	2.66441	3.42514	3.38663	3.23826
3.99	0.210163	0.131934	0.245402	1.14005	0.855781	1.26994	1.93731	2.84106	2.66028	3.42287	3.38748	3.23933
3.99333	0.215664	0.132495	0.248658	1.13885	0.855246	1.27291	1.93965	2.84376	2.65995	3.42401	3.38916	3.24026
3.99667	0.208549	0.133481	0.247644	1.14316	0.856371	1.27812	1.93629	2.84448	2.66336	3.42378	3.38934	3.23767
4	0.210836	0.13144	0.248861	1.14231	0.85697	1.28157	1.93761	2.84476	2.66031	3.41842	3.3893	3.23958
4.00333	0.211033	0.131873	0.251563	1.14341	0.856411	1.28267	1.9387	2.84483	2.65991	3.4219	3.38862	3.2395
4.00667	0.220231	0.132029	0.248644	1.14874	0.859474	1.2808	1.94016	2.8443	2.66427	3.41899	3.38693	3.2402
4.01	0.210375	0.13235	0.246433	1.14564	0.862478	1.28245	1.9489	2.84226	2.66182	3.42298	3.38816	3.23935
4.01333	0.216588	0.131301	0.246395	1.15116	0.861553	1.28043	1.94615	2.84158	2.66065	3.42383	3.39009	3.24045
4.01667	0.212856	0.133448	0.244684	1.14452	0.862333	1.2802	1.93994	2.84192	2.66445	3.42539	3.38889	3.23816
4.02	0.214887	0.132567	0.242665	1.14838	0.864832	1.28253	1.93812	2.84365	2.66224	3.41477	3.3889	3.23619
4.02333	0.212652	0.132941	0.243795	1.15304	0.864562	1.28566	1.94793	2.84317	2.66137	3.42145	3.38964	3.23315
4.02667	0.213313	0.13273	0.243168	1.15186	0.865611	1.28724	1.93827	2.84422	2.66505	3.42105	3.38921	3.23303
4.03	0.215201	0.134467	0.245749	1.15223	0.869424	1.29013	1.94043	2.84527	2.66377	3.42312	3.38826	3.23155
4.03333	0.219236	0.134061	0.24605	1.15851	0.870752	1.29536	1.94855	2.8466	2.66456	3.4229	3.38981	3.23456
4.03667	0.219631	0.133505	0.246336	1.15708	0.870382	1.30034	1.94886	2.84737	2.66826	3.41934	3.39201	3.23704
4.04	0.220801	0.134571	0.247067	1.1545	0.871797	1.30109	1.94605	2.84952	2.66666	3.42528	3.39272	3.2386
4.04333	0.215738	0.134648	0.251267	1.15961	0.873416	1.30623	1.94355	2.84924	2.66617	3.41925	3.39311	3.2402
4.04667	0.216382	0.133166	0.250424	1.16064	0.873041	1.30726	1.95245	2.84817	2.67249	3.42516	3.39416	3.24368
4.05	0.219038	0.133	0.251721	1.16831	0.874734	1.30876	1.94365	2.84787	2.66971	3.42256	3.39393	3.24023
4.05333	0.21531	0.134324	0.25499	1.163	0.876958	1.306	1.94713	2.84579	2.66847	3.42265	3.39305	3.24161
4.05667	0.219306	0.134089	0.254883	1.16584	0.87827	1.30841	1.9477	2.84525	2.67383	3.42315	3.39433	3.24332
4.06	0.214255	0.134031	0.252791	1.1677	0.877912	1.30832	1.94692	2.84823	2.6715	3.42282	3.39378	3.24398
4.06333	0.221929	0.134758	0.256178	1.16668	0.880153	1.31002	1.94491	2.85055	2.66691	3.42246	3.39332	3.2426
4.06667	0.213839	0.136521	0.25527	1.17511	0.880758	1.31285	1.94558	2.85319	2.67194	3.42488	3.39562	3.24495
4.07	0.21732	0.135223	0.253305	1.16892	0.882854	1.31771	1.95492	2.85471	2.67099	3.42393	3.39582	3.24372
4.07333	0.21455	0.135346	0.256323	1.17347	0.885399	1.32086	1.94875	2.85695	2.67	3.42393	3.3966	3.2435
4.07667	0.216277	0.136076	0.254924	1.17532	0.888026	1.32327	1.94983	2.85675	2.67281	3.42159	3.39824	3.24222
4.08	0.214728	0.135869	0.252306	1.17275	0.88674	1.32663	1.94522	2.85657	2.67285	3.42338	3.40054	3.24459
4.08333	0.214877	0.136316	0.255631	1.18286	0.884439	1.3294	1.95129	2.85573	2.67273	3.42203	3.40046	3.24141
4.08667	0.217017	0.136987	0.253499	1.17724	0.884192	1.33185	1.95484	2.8578	2.67383	3.4285	3.40083	3.24519
4.09	0.21579	0.135571	0.250583	1.17877	0.883954	1.33563	1.95543	2.8567	2.67195	3.42363	3.40124	3.24445
4.09333	0.219166	0.136623	0.252801	1.17946	0.883919	1.33956	1.96079	2.85572	2.67446	3.42098	3.39979	3.24511
4.09667	0.214218	0.134684	0.252319	1.18699	0.885338	1.34279	1.95778	2.85592	2.67501	3.43043	3.40084	3.24433
4.1	0.215798	0.132868	0.250886	1.18305	0.889908	1.34571	1.95301	2.85594	2.67502	3.4222	3.40154	3.24802
4.10333	0.218807	0.133107	0.254857	1.18212	0.890311	1.34797	1.95556	2.85496	2.67647	3.41775	3.40171	3.24603
4.10667	0.21721	0.133815	0.256849	1.18805	0.891058	1.34909	1.95886	2.85572	2.67516	3.42211	3.40178	3.24681
4.11	0.222708	0.133049	0.257935	1.19037	0.890166	1.34949	1.95719	2.85628	2.67623	3.42242	3.40258	3.24631
4.11333	0.216695	0.135124	0.259347	1.18863	0.890851	1.3521	1.95639	2.85728	2.6769	3.42731	3.40274	3.2467
4.11667	0.221553	0.135758	0.259245	1.18964	0.891594	1.35279	1.95522	2.85857	2.67679	3.4231	3.4003	3.24577
4.12	0.216981	0.135924	0.260225	1.19133	0.892586	1.35447	1.95745	2.85874	2.6783	3.42682	3.4016	3.24581
4.12333	0.221878	0.137561	0.259846	1.19451	0.893269	1.3562	1.95768	2.86068	2.67872	3.42574	3.40118	3.24327
4.12667	0.217136	0.137441	0.257693	1.20114	0.895481	1.3564	1.95981	2.86234	2.67851	3.42787	3.40188	3.24605
4.13	0.225857	0.13729	0.257217	1.19502	0.896923	1.3574	1.96251	2.86391	2.67931	3.42623	3.40118	3.24421
4.13333	0.216436	0.137107	0.259862	1.19509	0.89674	1.35943	1.96404	2.86558	2.67786	3.42292	3.40517	3.24273
4.13667	0.214656	0.138056	0.256981	1.20476	0.898891	1.36332	1.96033	2.86672	2.67819	3.42658	3.40565	3.23755
4.14	0.218798	0.136053	0.25731	1.20547	0.900976	1.36607	1.96254	2.86581	2.67854	3.42757	3.40582	3.23884
4.14333	0.221888	0.137854	0.257185	1.20468	0.901026	1.36863	1.95973	2.86588	2.67853	3.43139	3.40724	3.23443
4.14667	0.22304	0.137679	0.256843	1.2033	0.904495	1.37349	1.96623	2.86508	2.67895	3.42017	3.40733	3.23258
4.15	0.217546	0.138431	0.253827	1.2049	0.906171	1.37559	1.96819	2.864	2.68013	3.42721	3.40505	3.23116
4.15333	0.222026	0.137885	0.256333	1.21094	0.907843	1.37767	1.96342	2.86352	2.67965	3.43199	3.40692	3.23136
4.15667	0.216733	0.1379	0.256761	1.21149	0.90951	1.38171	1.96524	2.86272	2.68059	3.4248	3.40726	3.23021
4.16	0.219559	0.136782	0.26121	1.20139	0.912616	1.38411	1.967	2.86381	2.68009	3.42862	3.40575	3.23129
4.16333	0.222316	0.137932	0.263445	1.2067	0.912097	1.38269	1.9666	2.864	2.68151	3.42796	3.40629	3.23038
4.16667	0.220246	0.137619	0.264287	1.2091	0.916761	1.386	1.96168	2.86405	2.68023	3.42635	3.40694	3.23053
4.17	0.219646	0.136745	0.265493	1.2136	0.91834	1.38674	1.97126	2.86537	2.68149	3.42376	3.40446	3.23183
4.17333	0.222899	0.139102	0.266047	1.20871	0.91934	1.38622	1.96654	2.86763	2.68174	3.43231	3.40476	3.23071
4.17667	0.223767	0.138874	0.261855	1.21753	0.922362	1.38814	1.96731	2.86713	2.68181	3.42832	3.40665	3.2307
4.18	0.2218	0.138426	0.262051	1.21885	0.925009	1.39117	1.96911	2.86747	2.68408	3.42788	3.40656	3.23166
4.18333	0.219645	0.138981	0.263363	1.21592	0.923862	1.39259	1.97075	2.86839	2.68489	3.43094	3.40712	3.23259
4.18667	0.222104	0.139612	0.261812	1.22616	0.923694	1.39388	1.96869	2.86815	2.68626	3.42326	3.40963	3.232
4.19	0.220451	0.138364	0.262358	1.22562	0.924189	1.39442	1.97203	2.86923	2.68876	3.42946	3.40931	3.2331
4.19333	0.222617	0.13971	0.265674	1.22516	0.924013	1.39741	1.96972	2.87082	2.68636	3.4269	3.40946	3.23267
4.19667	0.21805	0.140368	0.262827	1.22281	0.922829	1.40026	1.96819	2.8727	2.68745	3.42566	3.41156	3.23406
4.2	0.21799	0.140447	0.262495	1.2278	0.9235	1.40126	1.97139	2.87422	2.68856	3.43026	3.41311	3.23428
4.20333	0.220173	0.141143	0.265607	1.22285	0.924515	1.40205	1.96883	2.87503	2.68742	3.42812	3.41234	3.23587
4.20667	0.222596	0.14313	0.263411	1.22223	0.925666	1.40683	1.97611	2.87542	2.6877	3.42734	3.41361	3.23462
4.21	0.220137	0.143005	0.261398	1.23008	0.927386	1.40866	1.97682	2.87646	2.68836	3.42888	3.41526	3.23324
4.21333	0.218924	0.143577	0.264572	1.23218	0.930555	1.40837	1.97498	2.87716	2.68746	3.43196	3.41375	3.23186
4.21667	0.223894	0.142556	0.263167	1.2343	0.932201	1.41153	1.98003	2.87735	2.68768	3.42399	3.41227	3.22977
4.22	0.218746	0.142548	0.260794	1.23725	0.933782	1.41415	1.97585	2.87973	2.68701	3.42617	3.41311	3.22895
4.22333	0.224993	0.141661	0.2636	1.23264	0.935839	1.41528	1.97324	2.87975	2.68901	3.43442	3.4141	3.2285
4.22667	0.219698	0.140823	0.264188	1.23667	0.936372	1.41835	1.97719	2.87865	2.6877	3.4326	3.41373	3.22912
4.23	0.221883	0.141624	0.263689	1.23885	0.938207	1.42278	1.97968	2.87872	2.68704	3.42932	3.41667	3.2293
4.23333	0.222041	0.144083	0.265207	1.24314	0.941078	1.42399	1.97507	2.87946	2.68977	3.43662	3.41751	3.23041
4.23667	0.221749	0.144648	0.265224	1.23996	0.943435	1.42657	1.97843	2.8785	2.68921	3.42926	3.41761	3.23066
4.24	0.226821	0.145515	0.264414	1.24328	0.944488	1.43012	1.97966	2.87859	2.68958	3.42668	3.41593	3.23111
4.24333	0.222519	0.147935	0.26711	1.24478	0.945832	1.43341	1.98283	2.87829	2.6916	3.42526	3.41506	3.2319
4.24667	0.229114	0.145148	0.266077	1.24789	0.945215	1.43494	1.98267	2.87793	2.6909	3.42587	3.4137	3.23275
4.25	0.223371	0.145231	0.266232	1.25337	0.945884	1.4377	1.98044	2.87817	2.69099	3.43149	3.41237	3.23362
4.25333	0.219863	0.146173	0.268346	1.24972	0.94724	1.44051	1.98101	2.87756	2.69062	3.43339	3.41341	3.23262
4.25667	0.223563	0.144779	0.269402	1.25244	0.949362	1.44087	1.98558	2.87798	2.69118	3.42791	3.41513	3.23355
4.26	0.223735	0.143822	0.2674	1.2479	0.951128	1.44161	1.98021	2.87957	2.69412	3.43375	3.41618	3.23297
4.26333	0.21996	0.145429	0.268782	1.25373	0.952473	1.44297	1.98121	2.88027	2.69268	3.42393	3.41721	3.23315
4.26667	0.224452	0.144197	0.270658	1.25566	0.954773	1.4449	1.98542	2.88065	2.69498	3.42343	3.42025	3.23435
4.27	0.228337	0.14236	0.268172	1.25582	0.956983	1.44605	1.98795	2.88177	2.69737	3.43257	3.41867	3.23515
4.27333	0.224838	0.143833	0.269055	1.25914	0.956882	1.44723	1.98722	2.8822	2.69393	3.42656	3.41919	3.23568
4.27667	0.221444	0.142781	0.270809	1.25589	0.95814	1.4488	1.98389	2.88212	2.69635	3.43281	3.41846	3.23597
4.28	0.225672	0.142767	0.270251	1.26278	0.962372	1.45266	1.98537	2.88254	2.69823	3.43248	3.41884	3.23569
4.28333	0.225923	0.142533	0.269717	1.25997	0.963624	1.4554	1.98818	2.88096	2.69573	3.42953	3.41836	3.23494
4.28667	0.228262	0.143303	0.271348	1.26696	0.962679	1.45815	1.98351	2.88156	2.69798	3.43078	3.42116	3.23543
4.29	0.226147	0.140985	0.270232	1.26593	0.965937	1.46274	1.98432	2.88125	2.69847	3.43016	3.4207	3.23375
4.29333	0.224368	0.141589	0.269915	1.26723	0.967199	1.46585	1.98432	2.88153	2.69699	3.42568	3.42107	3.23367
4.29667	0.225124	0.141703	0.273821	1.27164	0.965832	1.46676	1.99375	2.88073	2.69884	3.43002	3.42061	3.23361
4.3	0.231431	0.143132	0.273301	1.26914	0.965538	1.46914	1.98751	2.88177	2.69832	3.42663	3.42083	3.23498
4.30333	0.225591	0.145282	0.272991	1.27352	0.968098	1.47282	1.9856	2.88235	2.69768	3.43132	3.41904	3.23502
4.30667	0.228536	0.146619	0.275945	1.27142	0.967049	1.47622	1.98848	2.88361	2.6982	3.43482	3.42056	3.2377
4.31	0.229942	0.146507	0.277673	1.27256	0.966373	1.47846	1.9898	2.88388	2.6991	3.43288	3.42207	3.23806
4.31333	0.227328	0.147825	0.273374	1.27583	0.968033	1.481	1.98987	2.88504	2.70033	3.43231	3.42323	3.23984
4.31667	0.224813	0.147736	0.273646	1.27145	0.968814	1.48297	1.98831	2.88748	2.70023	3.43883	3.42291	3.23823
4.32	0.230995	0.146765	0.275896	1.28265	0.969718	1.48379	1.9885	2.88747	2.70263	3.43567	3.42618	3.23812
4.32333	0.231899	0.147395	0.271723	1.27975	0.972043	1.48568	1.99159	2.88834	2.70508	3.43158	3.42595	3.23748
4.32667	0.225704	0.14829	0.269728	1.27921	0.976215	1.48622	1.9925	2.89002	2.70277	3.42955	3.42496	3.23799
4.33	0.223411	0.148297	0.271473	1.28286	0.977589	1.49028	1.99461	2.89085	2.70421	3.42757	3.42504	3.23811
4.33333	0.234594	0.147263	0.27216	1.28726	0.980439	1.49121	1.99308	2.89046	2.70546	3.4348	3.42505	3.23974
4.33667	0.229267	0.147602	0.269849	1.28058	0.982674	1.49451	1.99634	2.89205	2.70222	3.43099	3.42391	3.24015
4.34	0.232774	0.148783	0.270795	1.28544	0.983717	1.4968	2.00117	2.89276	2.7042	3.43702	3.42121	3.24041
4.34333	0.230209	0.149206	0.271187	1.29033	0.98345	1.50197	1.9977	2.89305	2.70371	3.43782	3.42321	3.24112
4.34667	0.227135	0.148801	0.271888	1.28779	0.984623	1.50426	1.99385	2.89492	2.70085	3.43274	3.42078	3.24049
4.35	0.230563	0.150678	0.272448	1.28704	0.985506	1.50856	2.00015	2.89534	2.70364	3.43882	3.42392	3.23993
4.35333	0.23192	0.149524	0.273601	1.29613	0.9851	1.51131	2.00152	2.89579	2.70356	3.4295	3.42364	3.2405
4.35667	0.228807	0.146694	0.275983	1.29375	0.985705	1.51352	1.99694	2.89675	2.70242	3.43065	3.4257	3.23982
4.36	0.232041	0.1466	0.277064	1.2947	0.985908	1.51591	2.0055	2.89703	2.70568	3.43649	3.42677	3.24202
4.36333	0.229904	0.146529	0.280051	1.29499	0.987858	1.51839	2.00034	2.897	2.70485	3.43417	3.42894	3.24192
4.36667	0.225759	0.146206	0.280659	1.29377	0.988544	1.51817	1.9973	2.89933	2.70495	3.43375	3.42629	3.24219
4.37	0.220963	0.148271	0.280547	1.29758	0.992492	1.5218	1.99666	2.89943	2.70705	3.42988	3.42683	3.2427
4.37333	0.231823	0.149748	0.283817	1.30226	0.995594	1.52412	2.0022	2.89883	2.70489	3.43243	3.42783	3.24363
4.37667	0.232972	0.149337	0.28533	1.29962	0.999385	1.5255	1.99761	2.89987	2.70618	3.43979	3.42744	3.24402
4.38	0.22904	0.150395	0.281778	1.30205	0.999972	1.5247	1.99977	2.90119	2.70936	3.43319	3.42671	3.24345
4.38333	0.230437	0.150391	0.281376	1.30614	1.00041	1.52962	1.99672	2.90042	2.70532	3.43689	3.42992	3.24404
4.38667	0.228848	0.150686	0.285302	1.30412	0.999331	1.52982	2.00042	2.90122	2.70709	3.43536	3.43168	3.24315
4.39	0.227659	0.152464	0.282309	1.31303	0.999128	1.53113	2.00313	2.9023	2.71038	3.43018	3.43087	3.24552
4.39333	0.229149	0.152016	0.281233	1.31214	0.999626	1.53186	2.00568	2.90255	2.70772	3.42958	3.43178	3.24259
4.39667	0.232369	0.151874	0.281555	1.30576	1.00198	1.53673	2.00402	2.90171	2.70768	3.4374	3.43515	3.2449
4.4	0.228562	0.151171	0.282126	1.31216	1.00604	1.53796	1.9999	2.9025	2.71291	3.43761	3.43333	3.2454
4.40333	0.228903	0.149307	0.280196	1.30906	1.00871	1.53991	2.00708	2.90333	2.70993	3.43375	3.43152	3.24622
4.40667	0.232896	0.147732	0.279678	1.31393	1.01075	1.54414	2.003	2.90358	2.71075	3.43756	3.43325	3.24488
4.41	0.230754	0.149632	0.280164	1.31415	1.01131	1.54682	2.00706	2.90418	2.71293	3.43919	3.43038	3.24746
4.41333	0.234195	0.149118	0.281201	1.31641	1.01107	1.54916	1.99849	2.90503	2.71016	3.4351	3.42842	3.24683
4.41667	0.235846	0.15081	0.280057	1.31913	1.01037	1.55295	2.00373	2.90518	2.71119	3.43678	3.43029	3.24696
4.42	0.231812	0.151649	0.280277	1.31581	1.01166	1.5565	2.00149	2.90468	2.71225	3.43503	3.43055	3.24854
4.42333	0.226795	0.152155	0.280822	1.32164	1.0132	1.55586	2.0028	2.90445	2.7099	3.43464	3.43013	3.24848
4.42667	0.235858	0.152292	0.280196	1.3178	1.01544	1.56021	2.00619	2.90531	2.71232	3.43988	3.43238	3.2487
4.43	0.234356	0.151649	0.28137	1.32388	1.01788	1.56173	2.01161	2.90458	2.71499	3.43447	3.43363	3.25049
4.43333	0.231305	0.151807	0.285207	1.32379	1.02109	1.56301	2.00657	2.90483	2.71194	3.43178	3.43332	3.25089
4.43667	0.230886	0.152105	0.283456	1.32971	1.02221	1.56432	2.00571	2.90618	2.71509	3.43771	3.43371	3.25018
4.44	0.233178	0.152348	0.283615	1.33083	1.02418	1.56788	2.01105	2.90653	2.71543	3.43194	3.43619	3.25137
4.44333	0.234442	0.151262	0.286932	1.32065	1.02498	1.56856	2.00577	2.9059	2.71211	3.43494	3.43625	3.25185
4.44667	0.237739	0.153064	0.288651	1.32916	1.02707	1.57173	2.00978	2.9079	2.71441	3.43678	3.43621	3.25211
4.45	0.225375	0.152319	0.287042	1.32752	1.02598	1.5738	2.0063	2.90996	2.71473	3.44024	3.43932	3.25273
4.45333	0.234645	0.153078	0.289761	1.3379	1.02797	1.57681	2.01081	2.91041	2.71146	3.43943	3.43906	3.25445
4.45667	0.232523	0.154056	0.292298	1.32973	1.02888	1.57861	2.0129	2.91091	2.71577	3.43593	3.4394	3.25408
4.46	0.234291	0.155515	0.290387	1.33978	1.03073	1.58191	2.00842	2.91157	2.71632	3.43928	3.43954	3.25297
4.46333	0.231533	0.155515	0.286435	1.33939	1.03195	1.58406	2.01102	2.91163	2.71428	3.43901	3.44078	3.25247
4.46667	0.228765	0.156376	0.286423	1.34039	1.03624	1.58591	2.01322	2.91119	2.71634	3.43918	3.43868	3.25213
4.47	0.233952	0.15542	0.287734	1.33785	1.03448	1.58817	2.01269	2.91227	2.71664	3.43892	3.43984	3.25153
4.47333	0.232264	0.155141	0.285491	1.34528	1.03466	1.59135	2.01596	2.91244	2.71349	3.43467	3.43866	3.25235
4.47667	0.238647	0.155318	0.283996	1.3463	1.03589	1.59459	2.01208	2.91472	2.71578	3.43533	3.43909	3.25344
4.48	0.234974	0.155465	0.285204	1.34883	1.03567	1.59673	2.01765	2.91394	2.71486	3.4377	3.43827	3.25383
4.48333	0.238054	0.155241	0.285282	1.34451	1.0346	1.59962	2.01471	2.9152	2.71608	3.43706	3.43875	3.25433
4.48667	0.232721	0.156415	0.283685	1.35437	1.03791	1.60258	2.01696	2.91432	2.71885	3.43492	3.44089	3.25579
4.49	0.235817	0.15679	0.28435	1.34831	1.0411	1.60645	2.01993	2.91524	2.71811	3.43758	3.44228	3.25556
4.49333	0.23179	0.156377	0.285562	1.35002	1.04236	1.60562	2.01696	2.91365	2.71782	3.43643	3.44288	3.25692
4.49667	0.237935	0.155253	0.28613	1.35745	1.04468	1.60832	2.01852	2.91454	2.72252	3.43995	3.44439	3.25616
4.5	0.235625	0.155358	0.287778	1.35391	1.04673	1.61214	2.01764	2.91421	2.71834	3.44075	3.44479	3.25642
4.50333	0.234167	0.155463	0.288382	1.35845	1.04559	1.61604	2.01505	2.91296	2.71881	3.445	3.44278	3.25578
4.50667	0.234914	0.155285	0.288342	1.35827	1.0451	1.61948	2.01518	2.91427	2.72298	3.43654	3.44208	3.25777
4.51	0.234235	0.155162	0.289229	1.36614	1.04551	1.62436	2.01857	2.91568	2.7209	3.43885	3.44222	3.25828
4.51333	0.236307	0.157522	0.293381	1.35865	1.04483	1.62782	2.0181	2.91779	2.71974	3.44154	3.44316	3.25864
4.51667	0.234942	0.156372	0.293901	1.36442	1.04491	1.62966	2.02493	2.91834	2.72417	3.43728	3.44334	3.25888
4.52	0.239417	0.156991	0.293744	1.36916	1.04873	1.63024	2.02226	2.92036	2.72162	3.43525	3.4437	3.25871
4.52333	0.234646	0.158503	0.297159	1.36903	1.05173	1.6319	2.02498	2.92075	2.7207	3.4399	3.44271	3.2588
4.52667	0.235517	0.157507	0.298387	1.36242	1.05462	1.63365	2.0216	2.91999	2.72277	3.43751	3.44527	3.25728
4.53	0.236675	0.157573	0.295562	1.36508	1.05698	1.63565	2.01699	2.9182	2.72116	3.43977	3.4448	3.25837
4.53333	0.233278	0.15879	0.295986	1.37587	1.05814	1.63726	2.01833	2.91859	2.72332	3.43911	3.44403	3.25951
4.53667	0.24125	0.158553	0.298041	1.37331	1.06045	1.64035	2.02021	2.91919	2.72368	3.44122	3.44611	3.2614
4.54	0.241538	0.156757	0.295914	1.37245	1.06064	1.64141	2.02427	2.91885	2.72434	3.43876	3.44855	3.26164
4.54333	0.237617	0.158284	0.294338	1.37673	1.06151	1.64381	2.02095	2.92056	2.72675	3.44447	3.4477	3.26208
4.54667	0.236985	0.155756	0.293096	1.37318	1.06296	1.64558	2.02464	2.923	2.72673	3.44184	3.44719	3.26182
4.55	0.238716	0.156286	0.292511	1.37791	1.06562	1.64892	2.02847	2.92393	2.72526	3.44324	3.44922	3.26105
4.55333	0.237954	0.156552	0.290647	1.37709	1.06391	1.65099	2.02414	2.92448	2.72814	3.44	3.44885	3.25912
4.55667	0.23505	0.15605	0.291904	1.37539	1.06406	1.65514	2.03005	2.92638	2.72557	3.44439	3.44912	3.25822
4.56	0.242204	0.155914	0.291228	1.38311	1.06584	1.65727	2.0268	2.92739	2.72651	3.43695	3.44923	3.25894
4.56333	0.241751	0.157773	0.29207	1.38632	1.06665	1.65985	2.02564	2.92651	2.72861	3.44714	3.4508	3.25946
4.56667	0.238358	0.157596	0.291065	1.38309	1.06387	1.66231	2.02765	2.92693	2.72698	3.44056	3.45108	3.2615
4.57	0.23732	0.157153	0.292095	1.38886	1.06764	1.66606	2.02563	2.92814	2.72771	3.43837	3.45085	3.26222
4.57333	0.239225	0.158208	0.290381	1.39059	1.07073	1.66576	2.02418	2.92688	2.72963	3.4425	3.45173	3.26275
4.57667	0.23606	0.157658	0.292593	1.38997	1.07074	1.667	2.03068	2.92644	2.72644	3.43427	3.45078	3.2635
4.58	0.240775	0.157122	0.295039	1.39124	1.07209	1.66759	2.02982	2.92772	2.728	3.44138	3.45163	3.26423
4.58333	0.2434	0.157059	0.298058	1.39278	1.0789	1.66946	2.02656	2.92752	2.72875	3.43699	3.45172	3.26252
4.58667	0.235328	0.158117	0.297591	1.39445	1.07956	1.66838	2.02352	2.92806	2.72674	3.44112	3.45308	3.26254
4.59	0.237778	0.160503	0.299284	1.39651	1.0808	1.67165	2.02794	2.92936	2.7294	3.44268	3.4528	3.26207
4.59333	0.236571	0.160842	0.302429	1.40182	1.08157	1.67328	2.02768	2.92996	2.73027	3.43692	3.45371	3.26233
4.59667	0.235393	0.161612	0.302479	1.39372	1.08269	1.67572	2.02944	2.931	2.72712	3.43818	3.45361	3.26227
4.6	0.238664	0.162364	0.301129	1.39892	1.07938	1.67757	2.02436	2.93182	2.73054	3.44049	3.45346	3.26274
4.60333	0.239792	0.16284	0.302879	1.40195	1.07961	1.68088	2.02627	2.93129	2.73027	3.4412	3.45362	3.26412
4.60667	0.238671	0.161521	0.304764	1.40095	1.07953	1.68148	2.02836	2.93178	2.72786	3.43855	3.45324	3.26415
4.61	0.240979	0.162224	0.300756	1.39882	1.08016	1.68534	2.02939	2.93103	2.73125	3.44486	3.45509	3.26414
4.61333	0.235909	0.160961	0.302136	1.40609	1.08183	1.6885	2.03102	2.92987	2.73311	3.44255	3.45507	3.26513
4.61667	0.241283	0.16115	0.301757	1.40822	1.08503	1.68964	2.03113	2.92965	2.73102	3.44367	3.45631	3.2653
4.62	0.238166	0.159615	0.301258	1.41328	1.087	1.69123	2.03429	2.92917	2.73527	3.44238	3.45589	3.26544
4.62333	0.24066	0.157243	0.299488	1.41217	1.08813	1.69509	2.03311	2.92879	2.7351	3.44461	3.45518	3.26638
4.62667	0.240619	0.15758	0.302557	1.40691	1.09124	1.69661	2.0304	2.92992	2.73254	3.4411	3.45519	3.26498
4.63	0.237654	0.158756	0.300023	1.41485	1.09307	1.69825	2.03931	2.93011	2.73522	3.44029	3.45561	3.26429
4.63333	0.240033	0.158377	0.300608	1.41423	1.09478	1.70005	2.0307	2.93108	2.73488	3.44092	3.45595	3.2652
4.63667	0.243709	0.159003	0.302594	1.41669	1.09561	1.70288	2.03426	2.93178	2.73316	3.4372	3.45652	3.26587
4.64	0.244388	0.161858	0.301533	1.41173	1.09735	1.70479	2.02817	2.93195	2.73644	3.4433	3.4592	3.26583
4.64333	0.241225	0.161055	0.299791	1.42301	1.09689	1.70805	2.03963	2.93207	2.73587	3.44169	3.4604	3.26795
4.64667	0.240634	0.162037	0.300119	1.41476	1.09735	1.70983	2.0309	2.93289	2.73488	3.44335	3.45923	3.26841
4.65	0.240258	0.161641	0.300167	1.42902	1.09794	1.71277	2.03519	2.93157	2.73804	3.4469	3.45914	3.26858
4.65333	0.238526	0.161603	0.298084	1.42525	1.09853	1.71459	2.03639	2.93173	2.73589	3.44445	3.45999	3.2677
4.65667	0.242304	0.161518	0.300549	1.4232	1.09988	1.71573	2.03536	2.93073	2.7364	3.44347	3.46057	3.2691
4.66	0.245058	0.162967	0.301314	1.42802	1.10152	1.71824	2.03928	2.92959	2.74027	3.44003	3.45934	3.26831
4.66333	0.238201	0.162492	0.302912	1.42498	1.10213	1.72073	2.03714	2.92909	2.73882	3.43846	3.46042	3.26866
4.66667	0.240532	0.163061	0.303032	1.42959	1.10255	1.72321	2.03986	2.92944	2.73747	3.44122	3.46006	3.26951
4.67	0.245867	0.164905	0.305008	1.42709	1.1064	1.72667	2.03895	2.92955	2.74222	3.44292	3.46087	3.27157
4.67333	0.240923	0.164915	0.304345	1.42893	1.10723	1.7302	2.04041	2.9314	2.73813	3.44182	3.46009	3.26948
4.67667	0.247517	0.166402	0.304776	1.43626	1.10926	1.7348	2.04013	2.93359	2.73756	3.45143	3.45867	3.27091
4.68	0.242852	0.165755	0.307201	1.43373	1.11248	1.73743	2.03457	2.93458	2.7406	3.44843	3.45895	3.27005
4.68333	0.238779	0.167465	0.307451	1.43784	1.11586	1.73998	2.04041	2.93686	2.73995	3.44622	3.45947	3.2709
4.68667	0.245534	0.167005	0.307607	1.43892	1.11726	1.74305	2.04391	2.93951	2.73901	3.44495	3.45989	3.2701
4.69	0.243442	0.166264	0.30909	1.44741	1.12006	1.74698	2.0398	2.93949	2.74382	3.43987	3.45978	3.27305
4.69333	0.242174	0.165141	0.310085	1.44025	1.12158	1.74606	2.04276	2.94016	2.74149	3.44819	3.46177	3.27303
4.69667	0.240944	0.165561	0.307267	1.43965	1.12089	1.74867	2.04419	2.93991	2.74085	3.44545	3.46271	3.27496
4.7	0.247009	0.163824	0.308794	1.44077	1.12231	1.75105	2.04381	2.94045	2.74203	3.43791	3.46323	3.27397
4.70333	0.244271	0.16304	0.310503	1.44418	1.12086	1.7514	2.04071	2.94017	2.74063	3.44513	3.4624	3.2732
4.70667	0.2402	0.164709	0.308966	1.44437	1.12222	1.75304	2.03557	2.94132	2.73863	3.44786	3.4637	3.27293
4.71	0.249228	0.164057	0.30938	1.44556	1.12304	1.75668	2.04074	2.94262	2.74327	3.45054	3.4641	3.27293
4.71333	0.245788	0.165203	0.310879	1.4524	1.12597	1.76126	2.04361	2.94481	2.74128	3.446	3.46377	3.27167
4.71667	0.248363	0.165459	0.31007	1.44884	1.12667	1.76534	2.04664	2.94546	2.74389	3.44789	3.46555	3.27167
4.72	0.244227	0.166007	0.307842	1.45284	1.12848	1.76832	2.03979	2.9455	2.74638	3.44576	3.46451	3.27411
4.72333	0.240482	0.166165	0.309817	1.44806	1.12777	1.77082	2.04539	2.94618	2.74689	3.44134	3.46444	3.27358
4.72667	0.244325	0.165504	0.310602	1.45133	1.12773	1.77117	2.04091	2.94604	2.74649	3.44889	3.46352	3.27469
4.73	0.243137	0.165341	0.310069	1.45633	1.12856	1.77276	2.0394	2.94555	2.74846	3.44896	3.46449	3.27672
4.73333	0.2516	0.164862	0.312511	1.45859	1.1286	1.77405	2.04232	2.94633	2.7447	3.44579	3.46317	3.27685
4.73667	0.246605	0.166444	0.313548	1.46241	1.13063	1.77519	2.05104	2.94602	2.74615	3.45099	3.46529	3.27657
4.74	0.245945	0.165436	0.312101	1.4628	1.13299	1.77624	2.04618	2.94672	2.74549	3.44607	3.46568	3.27757
4.74333	0.247453	0.166385	0.311696	1.46258	1.13702	1.78018	2.04656	2.94627	2.74338	3.44792	3.46645	3.2773
4.74667	0.247018	0.166065	0.31387	1.46439	1.13956	1.78197	2.05147	2.94632	2.74533	3.44584	3.46544	3.27729
4.75	0.244422	0.168538	0.311795	1.46513	1.14197	1.78492	2.05078	2.9461	2.74528	3.44634	3.46697	3.27966
4.75333	0.247658	0.167477	0.311934	1.47135	1.14349	1.78814	2.04944	2.94753	2.74518	3.44774	3.46693	3.28013
4.75667	0.250392	0.166057	0.31525	1.46683	1.14436	1.7933	2.05039	2.9471	2.74755	3.45133	3.466	3.28128
4.76	0.24749	0.16779	0.315612	1.47036	1.14453	1.79517	2.04733	2.94816	2.74584	3.44494	3.46805	3.28194
4.76333	0.247711	0.168077	0.313421	1.47284	1.14417	1.79645	2.05265	2.94834	2.74592	3.44711	3.46755	3.28082
4.76667	0.249001	0.167234	0.313851	1.47592	1.14632	1.79893	2.04962	2.94838	2.75001	3.44683	3.46539	3.2799
4.77	0.245448	0.167155	0.316035	1.47929	1.14785	1.80037	2.0498	2.94873	2.74792	3.45198	3.46691	3.27986
4.77333	0.246964	0.169481	0.31378	1.47791	1.14726	1.79932	2.04586	2.94866	2.74778	3.43989	3.46786	3.27916
4.77667	0.244453	0.168638	0.312935	1.48084	1.14881	1.80235	2.05512	2.94763	2.75221	3.44376	3.46655	3.2783
4.78	0.24497	0.169389	0.313689	1.47585	1.15046	1.8055	2.05075	2.94766	2.75194	3.44679	3.47013	3.2794
4.78333	0.245488	0.168716	0.314664	1.48173	1.15092	1.80624	2.04768	2.94694	2.74998	3.44337	3.47268	3.2796
4.78667	0.248835	0.168674	0.313676	1.48049	1.15348	1.81118	2.05281	2.94624	2.75221	3.45095	3.47232	3.28025
4.79	0.244557	0.169072	0.314394	1.48978	1.15731	1.81529	2.05293	2.94678	2.75439	3.45107	3.4729	3.28066
4.79333	0.247981	0.168177	0.315349	1.48302	1.1602	1.81803	2.04887	2.94759	2.75327	3.44733	3.47333	3.28118
4.79667	0.241169	0.168794	0.316375	1.49092	1.16178	1.81994	2.05123	2.94806	2.75166	3.44871	3.47252	3.28181
4.8	0.252505	0.168884	0.317877	1.495	1.16314	1.82385	2.05134	2.94876	2.75337	3.44748	3.47134	3.2831
4.80333	0.251443	0.1699	0.317441	1.49073	1.16347	1.82486	2.04928	2.95125	2.75619	3.44667	3.47314	3.283
4.80667	0.245102	0.16959	0.317074	1.4928	1.16412	1.82745	2.05519	2.95189	2.75538	3.44761	3.47318	3.28417
4.81	0.249537	0.171141	0.317061	1.49356	1.16472	1.82903	2.05385	2.95139	2.75451	3.45171	3.4727	3.28465
4.81333	0.249566	0.170372	0.319601	1.49496	1.16571	1.83184	2.05627	2.95352	2.75579	3.44732	3.47338	3.28381
4.81667	0.251095	0.171203	0.318254	1.49407	1.16694	1.83317	2.05749	2.95425	2.75647	3.44731	3.47788	3.28286
4.82	0.245512	0.170516	0.318838	1.49558	1.16801	1.8357	2.05696	2.95485	2.75396	3.45594	3.47664	3.28247
4.82333	0.245686	0.169491	0.322298	1.5042	1.16912	1.8379	2.05504	2.9564	2.75232	3.45099	3.4756	3.28232
4.82667	0.253273	0.170222	0.324652	1.50567	1.17058	1.841	2.05379	2.95837	2.75327	3.44874	3.47803	3.28265
4.83	0.245012	0.171244	0.322071	1.50628	1.17389	1.84351	2.05244	2.95944	2.75516	3.45101	3.47698	3.28355
4.83333	0.253075	0.172691	0.321549	1.50291	1.17615	1.8443	2.05142	2.96042	2.75563	3.45181	3.47531	3.28352
4.83667	0.253055	0.174263	0.324926	1.51041	1.17814	1.84738	2.05686	2.96113	2.75465	3.44944	3.47627	3.28336
4.84	0.247059	0.174557	0.320895	1.5133	1.18155	1.84936	2.05519	2.96131	2.75514	3.4475	3.47807	3.28312
4.84333	0.250219	0.173747	0.318205	1.50556	1.18221	1.85301	2.06001	2.96181	2.75721	3.44855	3.47718	3.28536
4.84667	0.254401	0.1725	0.318655	1.51192	1.18123	1.85505	2.05541	2.96111	2.75805	3.45175	3.47887	3.28612
4.85	0.246164	0.171637	0.319862	1.51321	1.18058	1.85907	2.0571	2.96085	2.75731	3.44654	3.47834	3.28725
4.85333	0.24777	0.171198	0.316848	1.50813	1.18198	1.85946	2.05128	2.95992	2.75734	3.45138	3.47705	3.28938
4.85667	0.256009	0.171869	0.319091	1.51538	1.18142	1.8626	2.058	2.96053	2.75951	3.45469	3.47843	3.28884
4.86	0.247819	0.172896	0.320402	1.51627	1.18301	1.86419	2.05779	2.96041	2.75987	3.45498	3.4797	3.28697
4.86333	0.249473	0.173975	0.320626	1.51912	1.1858	1.86802	2.05458	2.9613	2.76103	3.44823	3.47885	3.28702
4.86667	0.253526	0.173161	0.321045	1.51795	1.18832	1.87002	2.05979	2.96251	2.75983	3.44351	3.47945	3.2865
4.87	0.258225	0.174231	0.322697	1.52085	1.18838	1.87329	2.05567	2.96276	2.75963	3.44598	3.48177	3.28473
4.87333	0.248646	0.17524	0.321658	1.52204	1.19022	1.87634	2.05868	2.96157	2.7605	3.45101	3.48161	3.28471
4.87667	0.249476	0.173555	0.324192	1.52028	1.1917	1.87844	2.06411	2.96196	2.76096	3.45175	3.48218	3.28479
4.88	0.248333	0.173915	0.327772	1.52275	1.19275	1.88069	2.05735	2.96118	2.75766	3.4451	3.48547	3.28548
4.88333	0.252753	0.175871	0.328246	1.53193	1.19555	1.88339	2.05971	2.96189	2.75863	3.44608	3.48575	3.28499
4.88667	0.249145	0.173584	0.327257	1.53163	1.19837	1.88721	2.06169	2.96212	2.76138	3.44948	3.48483	3.28441
4.89	0.250235	0.173727	0.331833	1.53296	1.19983	1.88845	2.06675	2.96251	2.76266	3.44737	3.48592	3.28576
4.89333	0.25798	0.174953	0.331085	1.52974	1.20012	1.8901	2.06366	2.96324	2.76259	3.44575	3.48561	3.28652
4.89667	0.254705	0.175049	0.328102	1.53151	1.2013	1.89474	2.06501	2.96332	2.7622	3.44396	3.48318	3.28719
4.9	0.253302	0.173137	0.327886	1.53536	1.20117	1.90022	2.05708	2.96404	2.76323	3.45399	3.48408	3.28945
4.90333	0.253523	0.173747	0.331019	1.53417	1.20101	1.90341	2.06561	2.96488	2.765	3.45441	3.48628	3.29231
4.90667	0.253903	0.174194	0.327796	1.54062	1.20186	1.90522	2.06256	2.96654	2.76341	3.45946	3.48512	3.29312
4.91	0.251082	0.174087	0.327468	1.53892	1.20352	1.90788	2.06362	2.96723	2.76188	3.4577	3.48437	3.29381
4.91333	0.252973	0.173152	0.32867	1.5382	1.20522	1.90892	2.06515	2.96959	2.76315	3.44424	3.48508	3.29315
4.91667	0.25647	0.175444	0.328573	1.53972	1.20718	1.90873	2.06058	2.96968	2.76372	3.45303	3.48493	3.29411
4.92	0.250994	0.175432	0.325807	1.5467	1.20912	1.91047	2.06471	2.97087	2.76307	3.45674	3.48343	3.29336
4.92333	0.253071	0.174497	0.326948	1.54573	1.21094	1.91372	2.0674	2.97073	2.76406	3.44913	3.48504	3.29315
4.92667	0.253371	0.174588	0.326384	1.54447	1.21309	1.91675	2.06882	2.97053	2.76345	3.45558	3.48647	3.29313
4.93	0.256419	0.176005	0.325383	1.54853	1.21359	1.91788	2.06604	2.96883	2.76414	3.4514	3.48603	3.29428
4.93333	0.257183	0.175843	0.326745	1.54662	1.21433	1.92079	2.05844	2.96839	2.76511	3.44673	3.48542	3.29268
4.93667	0.251996	0.177572	0.325885	1.55221	1.21505	1.92326	2.06723	2.96747	2.76613	3.45317	3.48512	3.29421
4.94	0.25607	0.179067	0.325047	1.54832	1.21596	1.92623	2.06955	2.96704	2.76493	3.45333	3.48421	3.29465
4.94333	0.255457	0.179102	0.325925	1.5588	1.21732	1.92804	2.06962	2.96678	2.76542	3.45303	3.48496	3.29501
4.94667	0.256385	0.177568	0.329778	1.55732	1.21826	1.93021	2.06976	2.96705	2.76581	3.45362	3.48635	3.29695
4.95	0.256437	0.177122	0.331395	1.55726	1.21901	1.93343	2.06486	2.96698	2.76685	3.45864	3.48665	3.29791
4.95333	0.252934	0.176617	0.332448	1.56049	1.22134	1.9357	2.07219	2.96546	2.76624	3.45157	3.48883	3.29707
4.95667	0.252748	0.176618	0.33463	1.55822	1.22318	1.93919	2.06392	2.96563	2.76667	3.45512	3.49115	3.29749
4.96	0.254208	0.177551	0.337016	1.56151	1.22491	1.94256	2.06584	2.96709	2.76642	3.45579	3.49276	3.29837
4.96333	0.254022	0.179428	0.334516	1.56605	1.22583	1.94594	2.07038	2.96828	2.76793	3.45456	3.49293	3.29713
4.96667	0.249726	0.17777	0.333788	1.56479	1.22709	1.94796	2.07488	2.96967	2.76856	3.45106	3.49378	3.29766
4.97	0.253318	0.178757	0.335965	1.56844	1.22748	1.9521	2.06873	2.97224	2.76734	3.45312	3.49179	3.299
4.97333	0.256069	0.178066	0.337679	1.5721	1.22962	1.95402	2.07039	2.97414	2.76697	3.45847	3.49092	3.30067
4.97667	0.250005	0.178064	0.335521	1.56292	1.22959	1.95697	2.07599	2.97494	2.77125	3.45242	3.48959	3.30141
4.98	0.253476	0.179788	0.336281	1.57051	1.23062	1.96017	2.07157	2.97582	2.7722	3.45518	3.48995	3.30153
4.98333	0.260521	0.182358	0.33584	1.57188	1.23325	1.96231	2.06837	2.97491	2.76982	3.4532	3.49179	3.30066
4.98667	0.252714	0.181752	0.336076	1.57245	1.2346	1.96238	2.06726	2.97492	2.77077	3.45194	3.49227	3.3005
4.99	0.256221	0.181977	0.33353	1.57686	1.23644	1.9649	2.07487	2.9737	2.77301	3.45516	3.49327	3.29808
4.99333	0.253969	0.179857	0.333687	1.57073	1.23725	1.96736	2.07232	2.97485	2.77255	3.45406	3.49457	3.29784
4.99667	0.257907	0.177269	0.332643	1.57553	1.23962	1.97064	2.07235	2.97308	2.77236	3.45116	3.49419	3.29768
5	0.255369	0.176455	0.332112	1.58056	1.24024	1.97289	2.07185	2.97324	2.77138	3.45139	3.49356	3.29859
5.00333	0.259557	0.176139	0.33331	1.58181	1.24122	1.97704	2.07482	2.97346	2.7732	3.45832	3.49444	3.29914
5.00667	0.260904	0.176445	0.333316	1.58138	1.23989	1.97895	2.07337	2.97326	2.77489	3.45445	3.49388	3.30256
5.01	0.256998	0.179626	0.333107	1.58866	1.24185	1.98093	2.07188	2.97167	2.77484	3.45725	3.4931	3.30278
5.01333	0.258828	0.179538	0.334328	1.59351	1.24299	1.98235	2.0733	2.97401	2.77288	3.45764	3.49508	3.3027
5.01667	0.254048	0.180687	0.338744	1.58723	1.2443	1.98652	2.07446	2.97443	2.77479	3.4549	3.4956	3.30129
5.02	0.256583	0.180042	0.335842	1.58822	1.24779	1.98947	2.07628	2.97576	2.77607	3.45745	3.49612	3.30195
5.02333	0.260142	0.180295	0.336253	1.59056	1.24884	1.99202	2.07811	2.97768	2.77513	3.45659	3.49615	3.3014
5.02667	0.255602	0.181299	0.338175	1.59416	1.25007	1.99546	2.07632	2.97771	2.77363	3.45804	3.49681	3.30157
5.03	0.258646	0.182905	0.341453	1.59754	1.25242	1.99742	2.07508	2.97815	2.77423	3.45375	3.49639	3.30133
5.03333	0.260494	0.182214	0.338815	1.60038	1.25444	1.99845	2.06989	2.97956	2.77517	3.4508	3.49616	3.30337
5.03667	0.256572	0.184019	0.341472	1.59743	1.25369	1.99928	2.07788	2.97987	2.77483	3.45618	3.49678	3.30108
5.04	0.255622	0.184289	0.346213	1.5971	1.25626	2.00249	2.07139	2.98062	2.77512	3.45475	3.49766	3.30025
5.04333	0.255608	0.181236	0.346509	1.6031	1.25775	2.00296	2.0744	2.98267	2.77535	3.45931	3.49705	3.30008
5.04667	0.259366	0.181582	0.343242	1.60475	1.25876	2.00586	2.08266	2.98254	2.77599	3.46005	3.49802	3.30022
5.05	0.257247	0.18192	0.344273	1.60167	1.26084	2.01125	2.08091	2.98216	2.77786	3.45837	3.49693	3.29917
5.05333	0.260425	0.182872	0.343397	1.60196	1.26367	2.01418	2.07682	2.98305	2.77744	3.45831	3.49807	3.30039
5.05667	0.254598	0.183111	0.34205	1.61127	1.26389	2.0169	2.07131	2.98384	2.77647	3.45523	3.49723	3.30051
5.06	0.258331	0.182405	0.341339	1.60797	1.26511	2.02147	2.08355	2.98319	2.77674	3.45856	3.49785	3.30056
5.06333	0.259836	0.182298	0.341524	1.60812	1.2663	2.02344	2.07171	2.98411	2.77845	3.4572	3.4984	3.30106
5.06667	0.257175	0.181828	0.340516	1.60545	1.26671	2.02474	2.0771	2.98487	2.77935	3.45622	3.49805	3.30268
5.07	0.261753	0.181777	0.340702	1.61296	1.26909	2.02782	2.07817	2.98564	2.78079	3.45559	3.49665	3.30374
5.07333	0.260263	0.181849	0.339687	1.61401	1.27121	2.02992	2.08006	2.9849	2.78032	3.45681	3.49753	3.30385
5.07667	0.265654	0.183662	0.339572	1.61711	1.27209	2.03063	2.0815	2.9864	2.78073	3.46265	3.4983	3.30781
5.08	0.265263	0.18388	0.340214	1.6199	1.2721	2.03431	2.08141	2.98595	2.78099	3.45862	3.49878	3.30905
5.08333	0.258483	0.183427	0.34077	1.62078	1.27336	2.03552	2.07658	2.98535	2.77999	3.45648	3.50182	3.30751
5.08667	0.264756	0.182368	0.340932	1.62771	1.27343	2.03716	2.08072	2.98521	2.77717	3.45125	3.50329	3.30768
5.09	0.26374	0.182604	0.339916	1.62274	1.27515	2.0403	2.07906	2.98607	2.77737	3.45233	3.50502	3.30869
5.09333	0.262829	0.184012	0.339482	1.62737	1.27745	2.04263	2.08497	2.98358	2.77998	3.45669	3.50435	3.30607
5.09667	0.267083	0.18408	0.340335	1.62521	1.27945	2.04234	2.07901	2.98383	2.78136	3.45547	3.50434	3.30692
5.1	0.262034	0.186571	0.342147	1.6266	1.28013	2.04562	2.08189	2.98562	2.78156	3.46164	3.5036	3.30905
5.10333	0.261922	0.185682	0.345854	1.62038	1.28072	2.04685	2.0859	2.98521	2.78171	3.45679	3.50488	3.30973
5.10667	0.263	0.186055	0.345164	1.62796	1.28177	2.04823	2.07905	2.98503	2.78397	3.46612	3.50408	3.31101
5.11	0.263385	0.186044	0.347045	1.63418	1.28344	2.05129	2.07593	2.98718	2.78453	3.46211	3.50506	3.31142
5.11333	0.254898	0.185217	0.34972	1.63733	1.28781	2.05551	2.07667	2.98855	2.78445	3.45793	3.50507	3.30895
5.11667	0.255873	0.184367	0.351053	1.63595	1.28978	2.0562	2.08073	2.98814	2.78255	3.45817	3.50555	3.30902
5.12	0.25959	0.18554	0.349467	1.63717	1.29033	2.05911	2.08027	2.988	2.78369	3.45625	3.50348	3.30898
5.12333	0.262207	0.186211	0.354587	1.64002	1.29047	2.05967	2.08225	2.98878	2.78426	3.45686	3.50332	3.30788
5.12667	0.261351	0.186587	0.3568	1.63861	1.29257	2.06129	2.08159	2.98865	2.78471	3.45639	3.50379	3.30707
5.13	0.258431	0.186572	0.354933	1.64731	1.29128	2.06184	2.08143	2.98679	2.78276	3.455	3.50394	3.31009
5.13333	0.263858	0.188478	0.351977	1.64388	1.29281	2.06613	2.08216	2.98764	2.78291	3.45791	3.50488	3.3101
5.13667	0.255908	0.187688	0.352785	1.64722	1.29424	2.06896	2.08461	2.98881	2.7851	3.45648	3.50553	3.31065
5.14	0.261745	0.186577	0.351948	1.64844	1.29632	2.0738	2.08183	2.98861	2.78638	3.45776	3.50508	3.30968
5.14333	0.258341	0.186713	0.348902	1.63734	1.29839	2.07649	2.077	2.98815	2.78622	3.46535	3.50516	3.31108
5.14667	0.261362	0.188604	0.34836	1.65274	1.30096	2.08179	2.08597	2.99094	2.78696	3.45784	3.5036	3.30916
5.15	0.264035	0.187703	0.349842	1.64966	1.30145	2.08404	2.08497	2.99125	2.78802	3.46177	3.50409	3.31117
5.15333	0.267676	0.189337	0.348501	1.65246	1.30557	2.08627	2.08209	2.99077	2.78913	3.46365	3.50539	3.31125
5.15667	0.260438	0.190211	0.347306	1.65037	1.30755	2.08729	2.08592	2.99172	2.78824	3.45939	3.50796	3.31295
5.16	0.270166	0.188936	0.348759	1.66162	1.30542	2.09097	2.08869	2.99364	2.78531	3.45305	3.50906	3.31303
5.16333	0.267226	0.188469	0.349751	1.65229	1.30539	2.092	2.08502	2.99368	2.78548	3.46139	3.51066	3.31569
5.16667	0.26521	0.186609	0.349815	1.66006	1.30801	2.09272	2.083	2.9937	2.78834	3.46175	3.50974	3.31517
5.17	0.2603	0.187483	0.351449	1.66535	1.31039	2.09635	2.08707	2.99456	2.78742	3.46087	3.50933	3.31626
5.17333	0.265325	0.187947	0.35156	1.66565	1.31191	2.09937	2.08939	2.99388	2.78676	3.45562	3.50837	3.31554
5.17667	0.266072	0.188796	0.353123	1.66145	1.31338	2.10007	2.08085	2.9935	2.78808	3.46148	3.50819	3.31345
5.18	0.265115	0.18876	0.352379	1.66759	1.31598	2.10267	2.08685	2.99326	2.79066	3.45746	3.50873	3.31315
5.18333	0.265778	0.190036	0.35638	1.66643	1.3191	2.10625	2.08733	2.99432	2.79024	3.45448	3.5098	3.31185
5.18667	0.266435	0.189496	0.356714	1.66457	1.31913	2.10644	2.08859	2.99517	2.78809	3.45291	3.5094	3.31146
5.19	0.265336	0.190128	0.35534	1.67147	1.31996	2.10898	2.08545	2.99619	2.78726	3.46047	3.51021	3.31055
5.19333	0.267347	0.189564	0.356172	1.67287	1.32342	2.11249	2.08825	2.99726	2.78993	3.45595	3.51014	3.31267
5.19667	0.266542	0.190803	0.359641	1.67323	1.32294	2.11507	2.07871	2.99911	2.78998	3.46034	3.51073	3.31449
5.2	0.266198	0.19081	0.356515	1.67572	1.32389	2.11842	2.09267	2.99823	2.78831	3.46273	3.50979	3.31532
5.20333	0.266973	0.19005	0.356252	1.68252	1.32529	2.12105	2.08787	2.99887	2.78893	3.45646	3.50988	3.31475
5.20667	0.264679	0.188769	0.362055	1.67341	1.32701	2.12604	2.09292	3.00084	2.79188	3.45961	3.51	3.31678
5.21	0.266836	0.190672	0.360749	1.68005	1.32816	2.1281	2.08651	3.00093	2.79257	3.45811	3.51079	3.31745
5.21333	0.267668	0.189141	0.358376	1.68474	1.3314	2.12819	2.08993	2.99988	2.79138	3.46231	3.51074	3.31577
5.21667	0.268097	0.188826	0.358057	1.68152	1.33134	2.12976	2.08694	3.00153	2.79017	3.46371	3.51157	3.31645
5.22	0.268181	0.188628	0.358537	1.68484	1.33149	2.13378	2.0947	3.00082	2.79234	3.45707	3.51299	3.31693
5.22333	0.266362	0.189338	0.356004	1.68618	1.33198	2.13308	2.09166	3.00073	2.79225	3.45387	3.51349	3.31772
5.22667	0.268511	0.188834	0.356034	1.68504	1.33233	2.13424	2.08181	3.00192	2.7911	3.46211	3.5141	3.3181
5.23	0.266287	0.189624	0.356592	1.69166	1.33314	2.13873	2.09429	3.00365	2.78972	3.46751	3.51483	3.31788
5.23333	0.266654	0.19219	0.358169	1.68122	1.3346	2.14117	2.09	3.00467	2.79183	3.45723	3.51451	3.31773
5.23667	0.264291	0.19236	0.357284	1.69105	1.33335	2.14334	2.08833	3.00663	2.79351	3.4624	3.515	3.31998
5.24	0.266026	0.192721	0.355895	1.69396	1.33577	2.14459	2.08965	3.0061	2.79313	3.45765	3.5138	3.31807
5.24333	0.2668	0.193608	0.356749	1.69559	1.33752	2.14871	2.09415	3.00628	2.79154	3.45661	3.51323	3.31789
5.24667	0.267751	0.19408	0.357189	1.69455	1.33761	2.15141	2.0869	3.00567	2.79212	3.45718	3.51407	3.31744
5.25	0.271812	0.193023	0.357125	1.69901	1.33908	2.15346	2.09069	3.00661	2.79328	3.45823	3.51521	3.31939
5.25333	0.26716	0.193571	0.36002	1.69845	1.34406	2.15538	2.09464	3.00526	2.79325	3.46283	3.5147	3.31686
5.25667	0.270906	0.194007	0.361587	1.70261	1.3445	2.16114	2.09407	3.00784	2.79199	3.4627	3.51526	3.31872
5.26	0.263934	0.192982	0.361892	1.71327	1.3471	2.16393	2.09472	3.00718	2.79271	3.47022	3.5163	3.31825
5.26333	0.267346	0.193013	0.364093	1.70392	1.34946	2.16539	2.09785	3.00736	2.79595	3.46301	3.51565	3.32042
5.26667	0.268407	0.192936	0.366461	1.70774	1.35011	2.16781	2.0936	3.00723	2.79719	3.45897	3.51605	3.31909
5.27	0.270943	0.193682	0.366708	1.70631	1.34965	2.17109	2.09404	3.00767	2.79451	3.46392	3.51708	3.32041
5.27333	0.268944	0.193001	0.366312	1.70884	1.35327	2.17384	2.08892	3.0074	2.79483	3.46536	3.51832	3.31982
5.27667	0.271131	0.192972	0.3692	1.71082	1.35343	2.17403	2.09122	3.00906	2.7973	3.46075	3.51718	3.32078
5.28	0.269317	0.19299	0.370367	1.71785	1.35419	2.17619	2.09341	3.00944	2.79739	3.45681	3.51686	3.31984
5.28333	0.271443	0.193075	0.368459	1.72146	1.3548	2.17917	2.09609	3.00988	2.79621	3.4606	3.51672	3.32042
5.28667	0.273512	0.193398	0.366781	1.71655	1.35834	2.18078	2.09575	3.01176	2.79718	3.45707	3.51669	3.31981
5.29	0.272545	0.194032	0.371318	1.71734	1.35973	2.18035	2.09762	3.01082	2.79808	3.46039	3.51634	3.32235
5.29333	0.274211	0.193455	0.369514	1.72014	1.36027	2.18428	2.09644	3.01082	2.79964	3.46448	3.51835	3.32168
5.29667	0.271647	0.192694	0.367097	1.7211	1.36156	2.18829	2.09793	3.0115	2.80043	3.46482	3.51847	3.32358
5.3	0.272582	0.193705	0.367846	1.72051	1.36401	2.19166	2.09545	3.01071	2.79953	3.46899	3.52023	3.32443
5.30333	0.271011	0.194827	0.368817	1.72299	1.36405	2.1953	2.09405	3.00852	2.79934	3.46219	3.52166	3.32633
5.30667	0.268641	0.195123	0.365709	1.73019	1.36479	2.19892	2.09883	3.00891	2.80182	3.46133	3.52282	3.32593
5.31	0.271129	0.195377	0.365488	1.72862	1.36537	2.20302	2.09761	3.00896	2.8014	3.46398	3.5236	3.32768
5.31333	0.270516	0.196104	0.366192	1.72218	1.36906	2.20585	2.09568	3.00981	2.79962	3.46148	3.52594	3.32489
5.31667	0.276462	0.195156	0.365868	1.72583	1.37019	2.2075	2.09639	3.01164	2.80008	3.46706	3.52535	3.32522
5.32	0.271577	0.194918	0.36522	1.72924	1.36937	2.20971	2.09398	3.0139	2.80178	3.46393	3.52326	3.32564
5.32333	0.270646	0.194604	0.365085	1.73389	1.37059	2.21439	2.09952	3.01373	2.80108	3.46644	3.52374	3.32505
5.32667	0.26626	0.195691	0.365543	1.73676	1.3741	2.21813	2.09313	3.01456	2.80054	3.45737	3.5225	3.32507
5.33	0.27618	0.195537	0.365541	1.73614	1.37465	2.22085	2.09632	3.01365	2.79907	3.46414	3.5219	3.32763
5.33333	0.265602	0.194784	0.366652	1.73352	1.37589	2.22338	2.09985	3.01083	2.79929	3.46065	3.52129	3.32769
5.33667	0.270494	0.193779	0.370402	1.73856	1.37953	2.22592	2.0999	3.01099	2.80101	3.46751	3.52282	3.32751
5.34	0.270904	0.194542	0.37004	1.7415	1.38122	2.22628	2.10353	3.01198	2.80242	3.46226	3.52123	3.32874
5.34333	0.274456	0.194436	0.369943	1.74499	1.38233	2.22575	2.10296	3.01043	2.80118	3.46673	3.52242	3.33014
5.34667	0.274439	0.194496	0.373463	1.743	1.38519	2.22552	2.10046	3.01107	2.80166	3.46951	3.52271	3.33067
5.35	0.27234	0.195233	0.374988	1.74837	1.38614	2.22618	2.10027	3.01337	2.8032	3.46003	3.52469	3.33173
5.35333	0.271868	0.194462	0.372752	1.74952	1.38656	2.22682	2.09927	3.01298	2.80256	3.47044	3.52516	3.33254
5.35667	0.26912	0.194321	0.374434	1.75279	1.38757	2.229	2.1033	3.01275	2.80126	3.46871	3.52626	3.33346
5.36	0.272488	0.195274	0.376054	1.75165	1.38802	2.23081	2.09777	3.01304	2.80048	3.4606	3.52567	3.33342
5.36333	0.274222	0.194799	0.375576	1.74876	1.38734	2.23293	2.10145	3.01336	2.8006	3.46596	3.52534	3.33445
5.36667	0.276622	0.196825	0.374101	1.75487	1.38785	2.2361	2.1003	3.0119	2.80121	3.46209	3.52497	3.33339
5.37	0.268591	0.197531	0.373842	1.75349	1.39	2.23838	2.09937	3.01215	2.80155	3.46373	3.5244	3.33293
5.37333	0.271531	0.197318	0.376102	1.7535	1.39235	2.24183	2.10694	3.01276	2.80244	3.46623	3.52451	3.33081
5.37667	0.267447	0.197246	0.376266	1.75744	1.39406	2.24514	2.10118	3.01428	2.80273	3.46824	3.52351	3.33012
5.38	0.269968	0.197975	0.373978	1.76288	1.39478	2.24863	2.10064	3.014	2.80477	3.46504	3.52429	3.33024
5.38333	0.273523	0.197318	0.373862	1.76699	1.39831	2.25128	2.10105	3.01572	2.80496	3.46614	3.52455	3.33194
5.38667	0.267173	0.197486	0.375213	1.76483	1.40031	2.25547	2.10035	3.0156	2.80563	3.46408	3.5265	3.33419
5.39	0.272663	0.19817	0.373596	1.76327	1.39926	2.25767	2.1016	3.01707	2.80525	3.46255	3.52688	3.3375
5.39333	0.271664	0.198999	0.371721	1.76264	1.39975	2.25871	2.10125	3.01691	2.80447	3.46068	3.52868	3.33991
5.39667	0.28116	0.200835	0.37216	1.76861	1.40301	2.26089	2.10032	3.01775	2.80479	3.46921	3.52946	3.34101
5.4	0.273884	0.200699	0.373228	1.76307	1.40471	2.26379	2.09868	3.01898	2.80498	3.4626	3.5285	3.34252
5.40333	0.271558	0.201233	0.372353	1.77168	1.40404	2.2648	2.10354	3.02001	2.80423	3.46726	3.52704	3.34452
5.40667	0.273712	0.200074	0.371776	1.77658	1.40599	2.26587	2.10315	3.01954	2.80361	3.46424	3.52862	3.34535
5.41	0.274727	0.200041	0.374425	1.77418	1.40893	2.26934	2.10095	3.02105	2.80613	3.46374	3.52839	3.34591
5.41333	0.270462	0.199762	0.374342	1.77672	1.41015	2.27227	2.10168	3.02127	2.80753	3.4596	3.52833	3.34843
5.41667	0.273174	0.19903	0.373934	1.77635	1.40914	2.2757	2.10823	3.02109	2.80848	3.4666	3.53123	3.34936
5.42	0.273312	0.199109	0.375621	1.78096	1.41154	2.27796	2.10754	3.02219	2.80871	3.46895	3.5332	3.3494
5.42333	0.277612	0.200485	0.376197	1.78025	1.41451	2.28133	2.107	3.02432	2.80785	3.46837	3.53288	3.35093
5.42667	0.281497	0.200046	0.37469	1.78106	1.41365	2.283	2.10877	3.02456	2.80804	3.46935	3.53499	3.35218
5.43	0.275846	0.200593	0.376146	1.78274	1.41423	2.28366	2.10747	3.0257	2.80958	3.46899	3.53571	3.35215
5.43333	0.275075	0.201387	0.377833	1.78147	1.41743	2.28495	2.10855	3.02698	2.8107	3.46855	3.53346	3.35135
5.43667	0.275488	0.202423	0.379634	1.78892	1.41911	2.28903	2.10565	3.02711	2.81138	3.46294	3.53297	3.35041
5.44	0.280967	0.202998	0.379377	1.78633	1.41863	2.29106	2.10333	3.02561	2.81186	3.46648	3.53338	3.34877
5.44333	0.273913	0.202386	0.381031	1.79048	1.42047	2.29283	2.10485	3.02498	2.81333	3.46844	3.53253	3.35069
5.44667	0.27537	0.202098	0.383074	1.78674	1.42227	2.29813	2.10905	3.02487	2.81234	3.46745	3.53245	3.35011
5.45	0.274584	0.202308	0.384136	1.79028	1.42219	2.30075	2.10924	3.024	2.81113	3.47159	3.53331	3.3513
5.45333	0.27368	0.202379	0.382038	1.79011	1.42264	2.30261	2.10897	3.02385	2.80982	3.46899	3.5329	3.35098
5.45667	0.280469	0.201321	0.384038	1.79672	1.42422	2.30557	2.10547	3.02394	2.80978	3.46502	3.53366	3.35143
5.46	0.277582	0.201378	0.387156	1.79978	1.42815	2.30945	2.10799	3.02349	2.81029	3.47435	3.53448	3.3492
5.46333	0.271973	0.201181	0.386378	1.79741	1.4291	2.31013	2.1062	3.02279	2.81197	3.46465	3.53304	3.349
5.46667	0.278062	0.202435	0.384639	1.79858	1.43125	2.31292	2.09842	3.02327	2.81225	3.46952	3.53283	3.34941
5.47	0.280283	0.202723	0.385286	1.80381	1.43164	2.31561	2.10696	3.02285	2.81283	3.47091	3.53425	3.35172
5.47333	0.278704	0.203711	0.388297	1.80482	1.4335	2.31857	2.10445	3.02341	2.81429	3.46845	3.53351	3.35237
5.47667	0.274383	0.204684	0.384861	1.80658	1.43468	2.32046	2.1107	3.0249	2.81342	3.46732	3.53276	3.35367
5.48	0.281579	0.204429	0.383273	1.80083	1.43516	2.32345	2.11019	3.02735	2.81314	3.46601	3.53347	3.35379
5.48333	0.278659	0.203766	0.384158	1.80869	1.43557	2.32582	2.10772	3.02656	2.81415	3.46962	3.53543	3.35353
5.48667	0.275741	0.203096	0.385395	1.8152	1.43797	2.32897	2.10777	3.02898	2.81437	3.46852	3.53471	3.35171
5.49	0.272449	0.201207	0.383203	1.81668	1.44031	2.33105	2.10533	3.03097	2.81488	3.47489	3.53513	3.3519
5.49333	0.283078	0.20113	0.382758	1.8141	1.44122	2.33289	2.10793	3.0321	2.81762	3.46575	3.53524	3.35247
5.49667	0.274571	0.201251	0.384786	1.81161	1.44271	2.33672	2.10668	3.03158	2.81634	3.46861	3.53685	3.35163
5.5	0.27763	0.201565	0.385894	1.81747	1.44535	2.33937	2.10901	3.03366	2.81513	3.47018	3.53584	3.35142
5.50333	0.276749	0.20212	0.384291	1.81463	1.44539	2.34074	2.10734	3.03345	2.8149	3.46839	3.53557	3.35217
5.50667	0.275564	0.204797	0.382889	1.81874	1.44631	2.34452	2.11266	3.03175	2.81596	3.46991	3.5363	3.35306
5.51	0.274039	0.205495	0.384773	1.82193	1.44717	2.34795	2.11168	3.03198	2.81458	3.4703	3.53909	3.35265
5.51333	0.283779	0.205907	0.383935	1.82937	1.44943	2.34968	2.10767	3.03337	2.81704	3.46718	3.53826	3.35134
5.51667	0.280573	0.205594	0.38357	1.82751	1.45158	2.35231	2.1062	3.03301	2.8184	3.47342	3.53895	3.35262
5.52	0.279766	0.205845	0.384821	1.82889	1.45427	2.35581	2.10687	3.03173	2.81944	3.46687	3.54021	3.35365
5.52333	0.280803	0.205694	0.385424	1.82916	1.45427	2.35782	2.10838	3.03314	2.81856	3.46934	3.54007	3.35314
5.52667	0.281004	0.204721	0.387195	1.8304	1.45352	2.3591	2.1121	3.03296	2.8192	3.46994	3.54013	3.35086
5.53	0.278089	0.203685	0.387712	1.8318	1.45497	2.3609	2.11124	3.03249	2.81829	3.4682	3.54229	3.35381
5.53333	0.276587	0.204682	0.388515	1.8374	1.45783	2.36208	2.10781	3.03351	2.81864	3.46878	3.54402	3.35253
5.53667	0.2754	0.205468	0.390866	1.83654	1.45864	2.36462	2.10674	3.03617	2.81924	3.46782	3.54309	3.35331
5.54	0.281775	0.204664	0.392023	1.83548	1.46114	2.3661	2.10526	3.03726	2.81875	3.47249	3.54344	3.35398
5.54333	0.281063	0.206141	0.391575	1.84383	1.46322	2.37057	2.11125	3.03776	2.81971	3.47022	3.54289	3.3581
5.54667	0.280519	0.207243	0.39257	1.84149	1.46416	2.37434	2.1099	3.03937	2.82078	3.46773	3.54132	3.3587
5.55	0.282303	0.206832	0.39402	1.84007	1.46415	2.37661	2.11529	3.03936	2.82025	3.46484	3.54167	3.36153
5.55333	0.282764	0.206889	0.392583	1.84236	1.46598	2.37908	2.10931	3.03855	2.8199	3.46497	3.54384	3.3599
5.55667	0.279647	0.207775	0.392415	1.85018	1.46641	2.38132	2.11679	3.03783	2.82127	3.47112	3.54463	3.36013
5.56	0.281315	0.207676	0.393172	1.8454	1.4679	2.38443	2.10404	3.03739	2.81992	3.46772	3.54357	3.35851
5.56333	0.281251	0.207933	0.395017	1.84878	1.4695	2.38605	2.10997	3.03629	2.81971	3.46825	3.54573	3.35897
5.56667	0.280907	0.208349	0.393899	1.85039	1.46959	2.38944	2.11711	3.03625	2.82176	3.47659	3.54347	3.35949
5.57	0.279468	0.208163	0.392777	1.84238	1.4726	2.39114	2.1106	3.03586	2.82219	3.46552	3.54161	3.36283
5.57333	0.286295	0.208272	0.395477	1.85439	1.47683	2.39425	2.11391	3.03595	2.8222	3.46695	3.54162	3.36434
5.57667	0.281704	0.207468	0.396698	1.85737	1.47854	2.39609	2.11202	3.03674	2.8225	3.46336	3.54326	3.36469
5.58	0.28135	0.208288	0.395016	1.85276	1.48015	2.3989	2.11909	3.03685	2.82325	3.46971	3.54071	3.36596
5.58333	0.279091	0.208767	0.395011	1.86016	1.48328	2.40121	2.11133	3.03741	2.82218	3.46927	3.54265	3.36328
5.58667	0.278244	0.209888	0.396594	1.86302	1.4855	2.40349	2.11148	3.03901	2.82188	3.46956	3.5458	3.36085
5.59	0.285038	0.209333	0.396488	1.86192	1.48553	2.40669	2.11149	3.0419	2.82251	3.46678	3.54463	3.36031
5.59333	0.282472	0.210734	0.393049	1.85772	1.4879	2.4082	2.10939	3.04288	2.82269	3.46858	3.54429	3.35985
5.59667	0.281432	0.211075	0.393281	1.86376	1.49	2.41113	2.10782	3.04353	2.8229	3.46839	3.54583	3.35937
5.6	0.290403	0.210942	0.393381	1.86966	1.48821	2.41322	2.12337	3.04438	2.82397	3.46921	3.54555	3.36001
5.60333	0.282351	0.21018	0.396627	1.86807	1.48852	2.41733	2.11767	3.04444	2.82521	3.47042	3.54424	3.36037
5.60667	0.281381	0.210326	0.394964	1.86761	1.49018	2.41867	2.11261	3.04307	2.82505	3.46873	3.54557	3.35917
5.61	0.284362	0.210376	0.397148	1.87608	1.49211	2.42295	2.11445	3.0442	2.82483	3.46911	3.54466	3.36099
5.61333	0.280336	0.210717	0.398443	1.87146	1.49172	2.42547	2.11641	3.04471	2.82431	3.46913	3.54574	3.35896
5.61667	0.285582	0.20928	0.401849	1.87967	1.49501	2.42968	2.11614	3.04401	2.82413	3.47483	3.54581	3.35922
5.62	0.284025	0.210177	0.399045	1.87387	1.49714	2.42926	2.11635	3.04345	2.82352	3.47131	3.54671	3.3609
5.62333	0.280041	0.210432	0.400317	1.87826	1.49761	2.43156	2.11332	3.04353	2.82515	3.46714	3.54659	3.36454
5.62667	0.277714	0.210734	0.403869	1.88259	1.49847	2.4333	2.1161	3.04104	2.82648	3.46857	3.54911	3.36418
5.63	0.285121	0.210802	0.404542	1.88152	1.50017	2.43586	2.11998	3.04053	2.82733	3.47087	3.54931	3.36761
5.63333	0.277518	0.212543	0.403071	1.88631	1.50153	2.43675	2.12168	3.04038	2.8279	3.47328	3.54991	3.36908
5.63667	0.280613	0.211994	0.404605	1.88352	1.50251	2.44034	2.11787	3.04044	2.82808	3.47037	3.54894	3.36987
5.64	0.281182	0.211692	0.407685	1.88537	1.5033	2.44473	2.11498	3.04182	2.82747	3.47811	3.5504	3.36761
5.64333	0.285716	0.212952	0.405523	1.88112	1.50648	2.44863	2.11917	3.04442	2.82935	3.47462	3.54895	3.36801
5.64667	0.288105	0.212559	0.404119	1.88947	1.50892	2.45014	2.11564	3.0468	2.82859	3.47318	3.54806	3.3656
5.65	0.28826	0.211952	0.403873	1.89277	1.50956	2.45314	2.11411	3.04833	2.82635	3.47182	3.54897	3.36619
5.65333	0.284542	0.211061	0.402439	1.89746	1.51013	2.45513	2.11818	3.04987	2.82619	3.47219	3.55134	3.36537
5.65667	0.287675	0.212264	0.401266	1.88976	1.51342	2.45626	2.11865	3.0493	2.82656	3.47107	3.55105	3.3652
5.66	0.281281	0.211203	0.400047	1.88995	1.51225	2.45696	2.11913	3.04901	2.82587	3.48216	3.5506	3.36407
5.66333	0.286758	0.211775	0.400195	1.89551	1.51286	2.46155	2.11712	3.04718	2.82617	3.47192	3.55205	3.36664
5.66667	0.285859	0.213288	0.39971	1.89632	1.51565	2.46347	2.11338	3.04741	2.82822	3.4704	3.55165	3.36635
5.67	0.287971	0.212855	0.399563	1.89761	1.51727	2.46619	2.11447	3.04832	2.82929	3.47049	3.5519	3.36725
5.67333	0.281103	0.21325	0.398511	1.91091	1.51805	2.46986	2.11856	3.04989	2.83081	3.47553	3.55235	3.36777
5.67667	0.285558	0.214932	0.400302	1.90661	1.52034	2.47301	2.12115	3.04967	2.83232	3.47738	3.55445	3.36611
5.68	0.284019	0.213527	0.401	1.90009	1.52092	2.47442	2.12293	3.05289	2.83274	3.47045	3.55337	3.36418
5.68333	0.285206	0.214353	0.400517	1.90468	1.52148	2.47737	2.1226	3.0535	2.83276	3.47486	3.55297	3.3656
5.68667	0.285353	0.215328	0.402003	1.90941	1.52311	2.48137	2.12648	3.05327	2.83298	3.46957	3.55263	3.36383
5.69	0.289253	0.215111	0.402223	1.90828	1.52471	2.48212	2.1188	3.05466	2.83288	3.47359	3.55177	3.36554
5.69333	0.29004	0.215091	0.401047	1.91262	1.52478	2.48382	2.12889	3.05627	2.83247	3.47624	3.55153	3.36805
5.69667	0.286108	0.215036	0.40224	1.91328	1.52707	2.48496	2.11725	3.05514	2.83271	3.46855	3.55265	3.3691
5.7	0.287447	0.213901	0.406276	1.91478	1.53055	2.48748	2.11623	3.05602	2.83178	3.47481	3.55306	3.36708
5.70333	0.288354	0.21395	0.409126	1.91853	1.53399	2.48895	2.11947	3.05556	2.83076	3.46987	3.55358	3.37064
5.70667	0.286431	0.214108	0.409922	1.91588	1.53555	2.49323	2.12294	3.05211	2.83225	3.47444	3.55392	3.36771
5.71	0.282996	0.214217	0.412172	1.91617	1.53808	2.49618	2.12273	3.05208	2.83187	3.47838	3.55593	3.3697
5.71333	0.291887	0.214413	0.415366	1.91804	1.5376	2.49842	2.11999	3.05176	2.83166	3.47653	3.55532	3.36832
5.71667	0.287654	0.213303	0.414392	1.92269	1.53704	2.49958	2.12306	3.05185	2.83206	3.46646	3.55526	3.37154
5.72	0.287486	0.214255	0.412474	1.92593	1.53772	2.50373	2.12087	3.05245	2.83278	3.47387	3.5558	3.37116
5.72333	0.289203	0.214966	0.412274	1.92691	1.53925	2.5057	2.11823	3.05521	2.83372	3.47817	3.55712	3.37185
5.72667	0.289865	0.214117	0.415618	1.93404	1.53977	2.50776	2.12146	3.05767	2.8341	3.47177	3.55483	3.37063
5.73	0.290549	0.214524	0.412345	1.93127	1.54393	2.51017	2.11838	3.05859	2.83343	3.48301	3.55645	3.37101
5.73333	0.290389	0.21624	0.410604	1.9307	1.54653	2.51467	2.11978	3.05763	2.83302	3.47846	3.55642	3.36847
5.73667	0.289931	0.21633	0.410582	1.93283	1.54577	2.51659	2.12507	3.05857	2.83435	3.47709	3.55608	3.36738
5.74	0.289467	0.216773	0.414845	1.93642	1.547	2.51835	2.11944	3.05653	2.83405	3.47621	3.5568	3.36661
5.74333	0.285689	0.216529	0.410806	1.93357	1.54947	2.5203	2.11986	3.05347	2.83302	3.47416	3.55849	3.36602
5.74667	0.290727	0.216912	0.410692	1.94198	1.54975	2.52379	2.12191	3.05262	2.83179	3.47116	3.55695	3.36685
5.75	0.294573	0.215436	0.411817	1.94324	1.55016	2.5254	2.12159	3.05407	2.83255	3.47164	3.55802	3.36685
5.75333	0.292832	0.216335	0.412037	1.94526	1.55196	2.52796	2.1183	3.05568	2.83465	3.47787	3.55918	3.36633
5.75667	0.293932	0.215601	0.407645	1.94476	1.55279	2.53082	2.12396	3.05918	2.83464	3.47256	3.55799	3.36831
5.76	0.292327	0.215487	0.407353	1.94508	1.55302	2.53498	2.12429	3.05965	2.83459	3.47854	3.55744	3.37017
5.76333	0.291344	0.216112	0.409608	1.94514	1.5559	2.53739	2.12523	3.06022	2.83641	3.47665	3.55675	3.37121
5.76667	0.285584	0.217531	0.410035	1.94925	1.55865	2.53973	2.11931	3.05982	2.83607	3.47769	3.55777	3.37116
5.77	0.287742	0.217887	0.409713	1.95081	1.56047	2.54233	2.12002	3.05936	2.83478	3.47721	3.55621	3.37304
5.77333	0.291248	0.21727	0.411073	1.95143	1.56257	2.5454	2.12587	3.05789	2.83521	3.47341	3.55544	3.37236
5.77667	0.29367	0.216699	0.412144	1.96121	1.56559	2.54629	2.12074	3.05896	2.83484	3.47171	3.55407	3.3737
5.78	0.282412	0.216522	0.412816	1.95365	1.56449	2.55007	2.12527	3.06162	2.83213	3.47493	3.5561	3.3743
5.78333	0.292021	0.216709	0.413655	1.96032	1.56489	2.55346	2.12033	3.06181	2.83442	3.47915	3.55541	3.37686
5.78667	0.295006	0.21671	0.416304	1.95663	1.56715	2.55538	2.12383	3.06247	2.83568	3.47355	3.55828	3.37554
5.79	0.296271	0.217069	0.419078	1.96245	1.56782	2.55933	2.12572	3.06126	2.83511	3.47657	3.55988	3.37775
5.79333	0.285854	0.218947	0.419353	1.96013	1.56898	2.56311	2.12366	3.06059	2.83585	3.47484	3.56053	3.37405
5.79667	0.29459	0.221157	0.418027	1.97315	1.5724	2.56509	2.12582	3.05848	2.83782	3.47756	3.56175	3.37382
5.8	0.291594	0.22102	0.420009	1.96819	1.57579	2.56736	2.1232	3.05898	2.83896	3.48122	3.56125	3.37357
5.80333	0.288993	0.221303	0.419916	1.96876	1.57461	2.56956	2.12085	3.05922	2.83883	3.47685	3.55911	3.37434
5.80667	0.287891	0.220846	0.418528	1.96253	1.57516	2.56841	2.12952	3.0624	2.83984	3.47678	3.55862	3.37323
5.81	0.295062	0.220089	0.420069	1.97094	1.57657	2.5712	2.13001	3.0629	2.83909	3.47244	3.55954	3.37713
5.81333	0.286479	0.219865	0.423192	1.97503	1.57838	2.57425	2.12696	3.06414	2.84029	3.4844	3.55919	3.37789
5.81667	0.299002	0.221163	0.422493	1.97526	1.57978	2.57645	2.12569	3.06423	2.8399	3.47653	3.5596	3.37811
5.82	0.292312	0.220642	0.421706	1.97722	1.58449	2.58094	2.12655	3.0628	2.84082	3.47866	3.55989	3.37912
5.82333	0.293941	0.221867	0.421202	1.9762	1.58745	2.58448	2.12506	3.06259	2.84034	3.47584	3.56058	3.38086
5.82667	0.295794	0.223069	0.422949	1.9849	1.58703	2.58677	2.1257	3.06419	2.84148	3.47827	3.56172	3.37858
5.83	0.292493	0.222394	0.421363	1.98117	1.58828	2.58746	2.12929	3.06436	2.84141	3.47548	3.56162	3.37949
5.83333	0.290005	0.220775	0.42052	1.9788	1.58873	2.59186	2.12966	3.06643	2.84082	3.47865	3.56253	3.37698
5.83667	0.286843	0.220874	0.420269	1.98577	1.58901	2.59485	2.12952	3.06882	2.84114	3.48036	3.56366	3.37712
5.84	0.295007	0.221345	0.42141	1.98934	1.58868	2.59845	2.13019	3.06909	2.84081	3.47372	3.56487	3.37617
5.84333	0.290188	0.22107	0.419989	1.98868	1.59288	2.60013	2.12931	3.06846	2.84064	3.4789	3.56438	3.37886
5.84667	0.295877	0.22032	0.419191	1.98856	1.59268	2.60327	2.12617	3.06822	2.84164	3.47869	3.56485	3.37736
5.85	0.294471	0.220559	0.41862	1.98748	1.59312	2.60415	2.12738	3.06589	2.84366	3.47929	3.56592	3.37926
5.85333	0.288685	0.219905	0.420326	1.99261	1.59448	2.60536	2.13417	3.06345	2.84332	3.48064	3.56785	3.37946
5.85667	0.290275	0.220983	0.419244	1.99181	1.59826	2.60809	2.12768	3.06354	2.84355	3.48228	3.56751	3.38042
5.86	0.299514	0.220822	0.418923	1.99045	1.59849	2.60976	2.12964	3.06321	2.84314	3.47786	3.56753	3.38017
5.86333	0.296456	0.221309	0.419275	2.00523	1.59957	2.61268	2.12458	3.06516	2.8435	3.47822	3.56727	3.38042
5.86667	0.290734	0.222137	0.421784	1.99577	1.59986	2.6137	2.12067	3.06698	2.84259	3.48084	3.56719	3.38199
5.87	0.293363	0.223479	0.420957	2.00341	1.60108	2.61576	2.12686	3.06862	2.84218	3.47664	3.56436	3.38162
5.87333	0.295566	0.223483	0.422528	2.00335	1.60197	2.61638	2.13088	3.06892	2.8407	3.4788	3.56386	3.38166
5.87667	0.289552	0.222858	0.423325	2.00378	1.60195	2.62166	2.12856	3.07056	2.84115	3.48024	3.56498	3.38309
5.88	0.29341	0.223816	0.425318	2.00505	1.6052	2.62538	2.1314	3.06948	2.84216	3.47741	3.56568	3.38359
5.88333	0.293921	0.225267	0.424396	2.01021	1.60781	2.62826	2.1269	3.06979	2.84461	3.48264	3.56574	3.38155
5.88667	0.293576	0.225134	0.425631	2.00562	1.60974	2.63054	2.12936	3.06933	2.84523	3.47956	3.56703	3.38247
5.89	0.289076	0.225159	0.426372	2.01033	1.61048	2.63476	2.12792	3.06916	2.84601	3.48104	3.56548	3.38347
5.89333	0.290202	0.226253	0.427285	2.00852	1.61195	2.63761	2.13016	3.06943	2.847	3.4746	3.56481	3.38178
5.89667	0.295986	0.226148	0.427955	2.01123	1.61189	2.63833	2.13318	3.06877	2.84706	3.47505	3.56712	3.38274
5.9	0.296303	0.22604	0.428208	2.01895	1.61349	2.64161	2.12735	3.06887	2.84699	3.47924	3.56717	3.38288
5.90333	0.296568	0.225061	0.427623	2.01654	1.61498	2.64632	2.12756	3.06921	2.84669	3.48269	3.56826	3.38392
5.90667	0.295071	0.225164	0.428223	2.01674	1.61789	2.64846	2.12564	3.07076	2.84735	3.48116	3.57129	3.38504
5.91	0.293686	0.226257	0.428779	2.01746	1.61961	2.64909	2.12694	3.07149	2.84908	3.48134	3.57142	3.38391
5.91333	0.298027	0.226302	0.427508	2.02756	1.62183	2.65229	2.12828	3.07325	2.85165	3.48588	3.57061	3.38341
5.91667	0.301712	0.227232	0.429256	2.02187	1.62365	2.65485	2.12922	3.07255	2.85025	3.48389	3.57252	3.38525
5.92	0.299162	0.227327	0.431138	2.02399	1.62469	2.65716	2.13435	3.07271	2.84981	3.48382	3.57199	3.38248
5.92333	0.296479	0.226941	0.429206	2.02352	1.62529	2.65905	2.13426	3.07223	2.84989	3.47847	3.57191	3.38048
5.92667	0.294963	0.227043	0.429176	2.03061	1.63021	2.66226	2.12523	3.07147	2.85134	3.47955	3.57277	3.38291
5.93	0.291982	0.225997	0.430444	2.02829	1.63211	2.66602	2.13237	3.07024	2.85009	3.48388	3.57345	3.38324
5.93333	0.293064	0.224649	0.429441	2.03103	1.63336	2.66666	2.12809	3.07033	2.84931	3.47986	3.5725	3.38305
5.93667	0.297674	0.224096	0.427628	2.02985	1.63543	2.66831	2.12678	3.07187	2.8489	3.48179	3.57321	3.38446
5.94	0.289571	0.226093	0.428437	2.03155	1.63664	2.67248	2.13118	3.07292	2.85038	3.47798	3.57254	3.38679
5.94333	0.299545	0.225644	0.429192	2.04239	1.6364	2.6748	2.12078	3.07486	2.85047	3.47841	3.57453	3.38596
5.94667	0.301071	0.226471	0.427522	2.03664	1.63734	2.67659	2.1312	3.07609	2.85026	3.48389	3.57334	3.38627
5.95	0.295039	0.226785	0.427267	2.03851	1.63978	2.68181	2.1276	3.07749	2.85103	3.47983	3.57211	3.38659
5.95333	0.295547	0.229129	0.428892	2.04232	1.64041	2.68469	2.1315	3.07686	2.85148	3.48589	3.57266	3.38542
5.95667	0.297272	0.228811	0.430135	2.03898	1.64142	2.6867	2.13656	3.07489	2.85116	3.47618	3.57433	3.38563
5.96	0.296686	0.22827	0.429933	2.04853	1.64363	2.68947	2.13141	3.07417	2.85172	3.47979	3.57207	3.38444
5.96333	0.301836	0.229379	0.430966	2.05422	1.64601	2.69053	2.1305	3.07425	2.85182	3.47896	3.57189	3.38536
5.96667	0.299635	0.229879	0.432767	2.04763	1.64762	2.69442	2.13642	3.07464	2.85039	3.47556	3.57396	3.38529
5.97	0.296697	0.230142	0.433386	2.0522	1.6477	2.69729	2.12819	3.07629	2.85197	3.48253	3.57264	3.38797
5.97333	0.306669	0.229164	0.435532	2.05653	1.6499	2.70006	2.1356	3.07831	2.85355	3.48509	3.57101	3.38661
5.97667	0.301899	0.230125	0.433571	2.05881	1.64917	2.70398	2.13152	3.07825	2.85306	3.47862	3.57139	3.38729
5.98	0.300186	0.229638	0.433834	2.05089	1.65028	2.70805	2.13606	3.07799	2.85166	3.48705	3.57354	3.38715
5.98333	0.301142	0.22966	0.433581	2.05509	1.65116	2.70786	2.13433	3.07782	2.85222	3.48024	3.57177	3.38937
5.98667	0.303202	0.229726	0.435632	2.05847	1.65489	2.70973	2.13634	3.07665	2.85218	3.48585	3.57431	3.38665
5.99	0.300368	0.229613	0.435315	2.05977	1.65556	2.7098	2.13141	3.07807	2.85347	3.48325	3.57541	3.38329
5.99333	0.300446	0.229091	0.438296	2.06002	1.6581	2.71253	2.13027	3.07833	2.85306	3.47902	3.576	3.38434
5.99667	0.303033	0.230358	0.439861	2.06518	1.65987	2.71702	2.13447	3.07918	2.85328	3.48012	3.57585	3.38349
6	0.29664	0.229617	0.442759	2.0638	1.65982	2.71999	2.13849	3.07803	2.85379	3.48743	3.57746	3.38119
6.00333	0.29852	0.227013	0.442115	2.06606	1.66236	2.72159	2.13475	3.07781	2.85517	3.48608	3.57448	3.38544
6.00667	0.297819	0.227945	0.442457	2.06702	1.66499	2.72843	2.13009	3.07722	2.85464	3.49007	3.57407	3.38761
6.01	0.299216	0.228838	0.442602	2.06771	1.66658	2.72982	2.13677	3.07867	2.85411	3.47736	3.57542	3.38549
6.01333	0.299487	0.229842	0.444058	2.06782	1.66694	2.73062	2.12685	3.07993	2.85471	3.486	3.5745	3.38747
6.01667	0.30132	0.228557	0.443152	2.07291	1.6705	2.73461	2.13752	3.08285	2.85569	3.48551	3.57386	3.38956
6.02	0.307316	0.23186	0.442996	2.07707	1.67179	2.73854	2.13284	3.08422	2.85644	3.48247	3.57564	3.38726
6.02333	0.300209	0.231193	0.441708	2.08066	1.67221	2.73691	2.13302	3.08399	2.85685	3.48207	3.57789	3.38777
6.02667	0.30337	0.231385	0.442754	2.0794	1.67336	2.73774	2.13308	3.08352	2.85584	3.48246	3.5788	3.38957
6.03	0.302649	0.230364	0.442696	2.08234	1.67652	2.7398	2.13294	3.08271	2.85553	3.4862	3.57902	3.38822
6.03333	0.305692	0.231164	0.442309	2.08476	1.67591	2.74133	2.13167	3.08372	2.85615	3.48466	3.58128	3.38524
6.03667	0.299484	0.231451	0.44176	2.08879	1.67818	2.74189	2.13114	3.08677	2.85615	3.48744	3.58131	3.38628
6.04	0.300877	0.23364	0.442019	2.08128	1.6802	2.74579	2.1316	3.08657	2.85495	3.47649	3.58138	3.38774
6.04333	0.301103	0.232861	0.443761	2.08478	1.68202	2.7498	2.13687	3.08696	2.85484	3.48247	3.58085	3.38781
6.04667	0.302008	0.234016	0.442803	2.09136	1.68268	2.75206	2.13643	3.08674	2.8549	3.47954	3.5812	3.39048
6.05	0.307622	0.234313	0.441415	2.09171	1.6848	2.75429	2.13943	3.08396	2.85586	3.48256	3.5781	3.39178
6.05333	0.307603	0.233946	0.441828	2.09064	1.68497	2.7585	2.13235	3.08112	2.85614	3.48392	3.5782	3.39335
6.05667	0.303103	0.231957	0.443205	2.08998	1.68516	2.76039	2.1312	3.08208	2.85596	3.48593	3.57647	3.39287
6.06	0.305695	0.233219	0.442996	2.09041	1.68516	2.76326	2.1387	3.08253	2.85682	3.47761	3.57435	3.39269
6.06333	0.297941	0.232591	0.44144	2.09539	1.6862	2.765	2.13732	3.08441	2.85846	3.48133	3.57411	3.39237
6.06667	0.298929	0.233128	0.443137	2.09911	1.68858	2.76644	2.13395	3.08585	2.85923	3.48457	3.57643	3.39038
6.07	0.304168	0.233442	0.443591	2.10165	1.6903	2.7679	2.1388	3.08722	2.85886	3.48084	3.57837	3.38952
6.07333	0.308721	0.234324	0.44545	2.10495	1.69232	2.7708	2.13645	3.08723	2.85845	3.48258	3.57955	3.39043
6.07667	0.307805	0.235186	0.443074	2.10714	1.69588	2.77329	2.13722	3.08881	2.85971	3.47875	3.58228	3.39203
6.08	0.299772	0.234837	0.445476	2.10757	1.69831	2.77561	2.13866	3.08802	2.86219	3.48939	3.58301	3.39023
6.08333	0.302405	0.234145	0.445673	2.10783	1.69813	2.77922	2.13886	3.08833	2.86062	3.48593	3.58297	3.39401
6.08667	0.310594	0.234298	0.44801	2.10994	1.69723	2.78226	2.13451	3.08849	2.85877	3.48236	3.58345	3.39389
6.09	0.305806	0.235113	0.44833	2.11145	1.69883	2.78567	2.1367	3.08898	2.85973	3.4823	3.58464	3.39384
6.09333	0.302991	0.233295	0.448464	2.11163	1.69933	2.78769	2.13518	3.08772	2.86217	3.48762	3.58511	3.39387
6.09667	0.301904	0.234883	0.450672	2.11084	1.69891	2.78995	2.14094	3.08832	2.85983	3.48887	3.58633	3.39338
6.1	0.305001	0.235765	0.454176	2.11839	1.7011	2.79211	2.13865	3.08921	2.86	3.48824	3.58782	3.39211
6.10333	0.304564	0.236574	0.45555	2.12064	1.70405	2.79575	2.13953	3.08966	2.86017	3.48758	3.5862	3.39274
6.10667	0.301334	0.235366	0.453901	2.11959	1.70785	2.7972	2.13641	3.08979	2.86266	3.48606	3.58664	3.38944
6.11	0.307246	0.236456	0.456381	2.12344	1.70946	2.79972	2.13484	3.08988	2.86171	3.48378	3.58645	3.38972
6.11333	0.308807	0.236053	0.455459	2.12092	1.71067	2.804	2.13976	3.08967	2.86169	3.48515	3.58652	3.39007
6.11667	0.311726	0.236814	0.454526	2.12735	1.71088	2.8067	2.13839	3.09082	2.86036	3.48447	3.58463	3.39191
6.12	0.306827	0.237261	0.452312	2.12464	1.71252	2.80825	2.14238	3.09034	2.86395	3.4887	3.58653	3.39109
6.12333	0.304034	0.238036	0.45254	2.13142	1.71257	2.81121	2.1404	3.0915	2.86327	3.48553	3.58676	3.39373
6.12667	0.307716	0.237407	0.453072	2.12921	1.71468	2.81425	2.13476	3.09185	2.86188	3.48734	3.58739	3.39437
6.13	0.299977	0.237688	0.455262	2.12852	1.71688	2.81646	2.13996	3.09397	2.86086	3.48582	3.58822	3.39577
6.13333	0.310256	0.239582	0.453888	2.13139	1.71863	2.81932	2.13664	3.09262	2.86517	3.48211	3.58966	3.39439
6.13667	0.308749	0.237589	0.453319	2.13389	1.72126	2.82337	2.14083	3.0943	2.865	3.48965	3.589	3.39556
6.14	0.304489	0.237389	0.453487	2.14073	1.72112	2.82597	2.13762	3.09424	2.86365	3.4815	3.5886	3.39584
6.14333	0.308834	0.239111	0.45607	2.12912	1.72007	2.82755	2.13635	3.09313	2.86248	3.48617	3.58827	3.39386
6.14667	0.306249	0.238467	0.454772	2.1418	1.72248	2.83019	2.14584	3.09114	2.86471	3.48171	3.58747	3.39497
6.15	0.303027	0.23677	0.454485	2.1396	1.72591	2.83258	2.13798	3.0924	2.86505	3.48889	3.5863	3.39446
6.15333	0.308963	0.237655	0.455004	2.13915	1.72479	2.8334	2.14193	3.0921	2.86241	3.48923	3.58636	3.39263
6.15667	0.30173	0.238941	0.455765	2.14981	1.72529	2.83485	2.13797	3.09262	2.86127	3.48066	3.58722	3.39537
6.16	0.307879	0.239595	0.455272	2.15007	1.72951	2.83723	2.14149	3.09578	2.86263	3.48914	3.58763	3.3987
6.16333	0.306661	0.238908	0.454516	2.14391	1.729	2.8409	2.14297	3.09591	2.86352	3.49295	3.58698	3.39701
6.16667	0.304631	0.240186	0.454759	2.1537	1.72792	2.84293	2.13737	3.09514	2.86263	3.48825	3.58753	3.3983
6.17	0.306922	0.241053	0.454972	2.14676	1.73103	2.84681	2.14162	3.09597	2.86407	3.49412	3.58797	3.40061
6.17333	0.308536	0.241543	0.454982	2.15718	1.73419	2.85061	2.13915	3.09741	2.86404	3.4809	3.58817	3.39813
6.17667	0.304929	0.240381	0.452379	2.15579	1.73439	2.85245	2.14149	3.09648	2.86721	3.48667	3.58855	3.39577
6.18	0.30789	0.24218	0.452028	2.15376	1.73674	2.85398	2.13806	3.09837	2.86868	3.4858	3.58917	3.39516
6.18333	0.309092	0.241811	0.453615	2.15535	1.7384	2.85647	2.14588	3.10022	2.86634	3.48249	3.59164	3.39525
6.18667	0.308213	0.242966	0.455535	2.15661	1.73999	2.85857	2.14132	3.09966	2.86555	3.49039	3.59369	3.3957
6.19	0.306617	0.242389	0.456015	2.161	1.74238	2.86073	2.13952	3.09863	2.86841	3.48771	3.59284	3.39641
6.19333	0.308749	0.243287	0.45591	2.16231	1.74579	2.86279	2.13825	3.09944	2.8698	3.48212	3.5928	3.39837
6.19667	0.312513	0.243494	0.457592	2.16321	1.74908	2.86642	2.13676	3.09828	2.86879	3.48618	3.59423	3.40234
6.2	0.311857	0.243527	0.456645	2.16768	1.74967	2.86975	2.14262	3.09682	2.86925	3.48597	3.59335	3.40037
6.20333	0.30824	0.242432	0.455933	2.16554	1.75105	2.8735	2.13828	3.0987	2.87029	3.48551	3.59147	3.39772
6.20667	0.313169	0.243954	0.455341	2.16704	1.75262	2.87735	2.14425	3.09836	2.8703	3.49005	3.59226	3.39913
6.21	0.306083	0.242237	0.455845	2.16475	1.75312	2.88271	2.14428	3.10006	2.8684	3.48474	3.59333	3.39853
6.21333	0.308034	0.242569	0.456116	2.17022	1.75466	2.88429	2.14743	3.10216	2.86638	3.48471	3.59343	3.39782
6.21667	0.312465	0.243702	0.458515	2.1714	1.75501	2.88552	2.14374	3.1033	2.86577	3.49202	3.59338	3.40102
6.22	0.313723	0.244239	0.459288	2.17511	1.75781	2.8866	2.14203	3.1016	2.86569	3.48762	3.595	3.40187
6.22333	0.312673	0.242548	0.461826	2.17983	1.75968	2.88761	2.14921	3.1016	2.86616	3.48747	3.59662	3.4014
6.22667	0.310444	0.24463	0.465741	2.1795	1.76045	2.88892	2.14211	3.1013	2.86429	3.48554	3.59535	3.39987
6.23	0.310556	0.244529	0.465459	2.18722	1.7596	2.89055	2.13823	3.10121	2.86516	3.48776	3.59498	3.40079
6.23333	0.305651	0.24353	0.464182	2.18883	1.76261	2.89262	2.14179	3.10234	2.86659	3.49406	3.59525	3.40013
6.23667	0.311682	0.244017	0.464064	2.18411	1.76276	2.89508	2.14332	3.10294	2.86875	3.49108	3.59455	3.40147
6.24	0.312473	0.245303	0.462512	2.18414	1.76411	2.89679	2.14147	3.10378	2.86867	3.48736	3.59219	3.40128
6.24333	0.308748	0.244351	0.460481	2.19046	1.76573	2.89991	2.14435	3.10513	2.86851	3.4895	3.5919	3.40301
6.24667	0.312944	0.243461	0.461036	2.19302	1.7679	2.90431	2.14564	3.10551	2.86915	3.48949	3.59242	3.40062
6.25	0.30633	0.244631	0.460366	2.19045	1.76875	2.90907	2.13905	3.10548	2.87211	3.48676	3.59367	3.40064
6.25333	0.308657	0.244672	0.460138	2.19752	1.77191	2.91167	2.1411	3.10717	2.87124	3.49028	3.59259	3.39911
6.25667	0.314171	0.243676	0.460328	2.19141	1.77301	2.91403	2.14278	3.10782	2.86938	3.489	3.59537	3.39512
6.26	0.305583	0.245566	0.460698	2.19575	1.77483	2.91594	2.14425	3.10589	2.87141	3.48801	3.59608	3.38845
6.26333	0.311977	0.245887	0.461334	2.19818	1.77633	2.91426	2.1448	3.10563	2.87279	3.49152	3.59611	3.38536
6.26667	0.312983	0.244242	0.463517	2.20014	1.77908	2.91616	2.14389	3.10457	2.87228	3.49046	3.59581	3.38113
6.27	0.312179	0.244079	0.46361	2.20081	1.77774	2.91927	2.14422	3.10247	2.8709	3.4891	3.59687	3.37722
6.27333	0.30828	0.244709	0.464368	2.208	1.77818	2.92255	2.14326	3.10298	2.87064	3.49573	3.59768	3.37756
6.27667	0.313547	0.242681	0.464164	2.20653	1.77963	2.9244	2.14448	3.10391	2.87194	3.49425	3.59808	3.37897
6.28	0.311955	0.244265	0.46367	2.20301	1.78214	2.93034	2.14467	3.10413	2.87142	3.48915	3.59811	3.37942
6.28333	0.304672	0.245662	0.461628	2.21119	1.78277	2.93375	2.13518	3.10594	2.87053	3.49609	3.5994	3.37992
6.28667	0.315956	0.245582	0.463504	2.20901	1.78467	2.93488	2.14357	3.10726	2.87111	3.49173	3.60066	3.38081
6.29	0.320416	0.244511	0.463961	2.21049	1.78526	2.93742	2.14359	3.10739	2.87342	3.48709	3.59801	3.383
6.29333	0.310413	0.246504	0.46483	2.20737	1.78799	2.9417	2.14362	3.10813	2.87276	3.4889	3.59923	3.38263
6.29667	0.309394	0.247264	0.466504	2.21482	1.79031	2.94234	2.14	3.10862	2.87427	3.49403	3.60009	3.38275
6.3	0.321793	0.24624	0.468417	2.21668	1.79174	2.94556	2.14582	3.10827	2.87459	3.49079	3.59984	3.38359
6.30333	0.308562	0.246697	0.468722	2.21483	1.79314	2.95032	2.14029	3.1091	2.87437	3.49292	3.60019	3.38346
6.30667	0.320075	0.247194	0.471503	2.2195	1.79738	2.95276	2.14441	3.10925	2.87461	3.48963	3.60225	3.38343
6.31	0.309631	0.246884	0.471607	2.22362	1.79851	2.95467	2.14403	3.10835	2.87681	3.48998	3.60241	3.38381
6.31333	0.314941	0.245354	0.471686	2.22856	1.79774	2.95969	2.14704	3.10849	2.87399	3.49416	3.60234	3.38496
6.31667	0.316779	0.246968	0.473367	2.22826	1.80062	2.96207	2.14279	3.10853	2.87277	3.48849	3.60131	3.38459
6.32	0.309199	0.247211	0.475433	2.22864	1.80255	2.96308	2.14103	3.10799	2.87437	3.49515	3.59973	3.38512
6.32333	0.314793	0.247607	0.47372	2.22698	1.80229	2.96776	2.14535	3.10845	2.87554	3.4933	3.59942	3.38392
6.32667	0.317803	0.24792	0.473306	2.23475	1.80198	2.97136	2.14306	3.10942	2.87439	3.48403	3.59825	3.38438
6.33	0.321806	0.248115	0.473121	2.22812	1.80299	2.97238	2.15235	3.10887	2.87428	3.4931	3.59942	3.38446
6.33333	0.311508	0.246685	0.4743	2.23454	1.80496	2.97475	2.15044	3.10921	2.87491	3.49044	3.60047	3.38429
6.33667	0.314317	0.246795	0.471876	2.23797	1.80709	2.97791	2.1456	3.10973	2.87502	3.49223	3.60103	3.38448
6.34	0.313275	0.246996	0.472448	2.2353	1.80614	2.97907	2.14875	3.10927	2.875	3.49717	3.60161	3.38619
6.34333	0.318447	0.246505	0.474703	2.24083	1.80851	2.97991	2.14209	3.10965	2.87446	3.49067	3.6018	3.38691
6.34667	0.314162	0.247425	0.476323	2.24042	1.8108	2.98431	2.1475	3.10979	2.87423	3.49012	3.60093	3.38588
6.35	0.314793	0.248061	0.475201	2.24717	1.81218	2.98666	2.14718	3.10985	2.87542	3.49556	3.60199	3.38706
6.35333	0.315136	0.24852	0.47516	2.24277	1.81251	2.98947	2.14412	3.11097	2.87786	3.49512	3.6035	3.38647
6.35667	0.313146	0.24892	0.474392	2.24585	1.81587	2.99212	2.14559	3.11221	2.87873	3.49334	3.60329	3.38675
6.36	0.315857	0.250739	0.476217	2.24562	1.81608	2.99679	2.14484	3.11218	2.8794	3.4979	3.6041	3.38681
6.36333	0.313181	0.250325	0.476327	2.24767	1.81711	2.99773	2.1454	3.11273	2.87976	3.49508	3.60533	3.38821
6.36667	0.315838	0.251115	0.475252	2.24934	1.81892	2.9998	2.14434	3.11378	2.87957	3.49233	3.60473	3.38788
6.37	0.316646	0.251968	0.476564	2.25516	1.8213	3.00287	2.14366	3.11278	2.87923	3.49353	3.60371	3.38939
6.37333	0.315089	0.25245	0.478	2.25002	1.82346	3.00454	2.14723	3.11286	2.87818	3.49426	3.60505	3.38962
6.37667	0.313836	0.251635	0.476689	2.25604	1.82729	3.00551	2.14882	3.11327	2.87785	3.48752	3.60641	3.39102
6.38	0.317353	0.252399	0.475495	2.25479	1.82999	3.01068	2.14476	3.11435	2.87795	3.4945	3.60565	3.39053
6.38333	0.314328	0.252196	0.474778	2.26249	1.82992	3.01254	2.14566	3.11388	2.87918	3.49424	3.60626	3.38977
6.38667	0.318723	0.250872	0.475409	2.26163	1.83059	3.01495	2.14639	3.11465	2.88035	3.49063	3.60688	3.39016
6.39	0.317724	0.249959	0.474971	2.2615	1.83203	3.01753	2.14283	3.11406	2.88092	3.49712	3.6055	3.38866
6.39333	0.317078	0.249346	0.47445	2.26575	1.83143	3.01838	2.14528	3.11368	2.87959	3.49808	3.60448	3.38751
6.39667	0.320222	0.248756	0.474642	2.26619	1.8326	3.01736	2.15023	3.11356	2.88156	3.48962	3.6058	3.38701
6.4	0.318155	0.248828	0.477574	2.27014	1.83362	3.01971	2.14377	3.11468	2.88144	3.49035	3.60649	3.38752
6.40333	0.319343	0.249925	0.480428	2.27165	1.83495	3.02123	2.14353	3.11654	2.88148	3.4961	3.60759	3.38701
6.40667	0.318223	0.250134	0.481742	2.27255	1.83725	3.02364	2.15643	3.11711	2.88125	3.49025	3.60902	3.38754
6.41	0.313651	0.251569	0.482451	2.27317	1.84051	3.02418	2.14835	3.11657	2.88115	3.48825	3.60966	3.3878
6.41333	0.312754	0.25352	0.487009	2.28302	1.8399	3.02827	2.14356	3.11768	2.88054	3.49344	3.60837	3.38871
6.41667	0.316844	0.253692	0.488415	2.27698	1.84166	3.03122	2.14535	3.11727	2.88217	3.49285	3.60889	3.38883
6.42	0.318754	0.252764	0.484595	2.28968	1.84302	3.03338	2.14742	3.11675	2.88142	3.48843	3.60863	3.38908
6.42333	0.31393	0.254285	0.483586	2.27974	1.84356	3.03858	2.1459	3.11762	2.88195	3.49356	3.60747	3.38981
6.42667	0.318262	0.254349	0.486578	2.28303	1.84551	3.04371	2.14525	3.11915	2.88215	3.49323	3.60826	3.38955
6.43	0.318878	0.25184	0.485045	2.27989	1.84754	3.04537	2.15073	3.11864	2.88321	3.49729	3.60973	3.38984
6.43333	0.322499	0.252505	0.483363	2.28671	1.84854	3.04837	2.14686	3.1195	2.88247	3.49815	3.60667	3.39168
6.43667	0.317309	0.253957	0.484823	2.2907	1.85119	3.04974	2.15381	3.11944	2.88321	3.49414	3.6056	3.39205
6.44	0.318429	0.252277	0.48587	2.28936	1.85138	3.05151	2.14548	3.11955	2.88238	3.49721	3.6079	3.3924
6.44333	0.319457	0.251845	0.485639	2.28727	1.85038	3.05572	2.15143	3.11961	2.88212	3.49268	3.60789	3.39373
6.44667	0.324862	0.253156	0.483673	2.29493	1.85285	3.05729	2.14949	3.12024	2.88169	3.50206	3.60549	3.39438
6.45	0.319071	0.252502	0.48421	2.29266	1.85528	3.06053	2.15024	3.1203	2.88153	3.49654	3.60641	3.39482
6.45333	0.323278	0.252398	0.485862	2.29615	1.85434	3.06298	2.14969	3.12048	2.88085	3.4952	3.60723	3.39566
6.45667	0.321951	0.254596	0.486259	2.29514	1.85517	3.06488	2.14646	3.12156	2.88143	3.49596	3.60522	3.39907
6.46	0.322749	0.255759	0.485015	2.29765	1.8576	3.06482	2.14591	3.12126	2.88088	3.49286	3.60403	3.40116
6.46333	0.316134	0.256611	0.485173	2.30301	1.8596	3.06766	2.14274	3.12223	2.88212	3.49431	3.6076	3.40245
6.46667	0.318574	0.258478	0.484712	2.30128	1.86089	3.06789	2.14446	3.12059	2.88336	3.49095	3.60856	3.40679
6.47	0.321379	0.257172	0.483166	2.3037	1.86288	3.07348	2.14814	3.121	2.88287	3.49104	3.60797	3.41086
6.47333	0.317988	0.256881	0.48379	2.3105	1.86446	3.07491	2.14753	3.12023	2.88244	3.49885	3.60883	3.41132
6.47667	0.321426	0.257469	0.483851	2.30503	1.86492	3.07946	2.15142	3.12104	2.88521	3.49979	3.61018	3.41326
6.48	0.322957	0.258361	0.484795	2.31032	1.86499	3.08283	2.15358	3.12106	2.88543	3.49406	3.60968	3.41599
6.48333	0.321613	0.258523	0.484755	2.30622	1.86741	3.08836	2.1492	3.12406	2.88549	3.49734	3.6113	3.41245
6.48667	0.318152	0.260849	0.48694	2.31115	1.86936	3.08783	2.14711	3.12465	2.88545	3.49974	3.61181	3.41236
6.49	0.322569	0.26132	0.486079	2.31477	1.87248	3.09242	2.14726	3.12425	2.88613	3.49225	3.6131	3.41265
6.49333	0.315723	0.260976	0.486427	2.31169	1.8755	3.09593	2.15031	3.12598	2.88527	3.49898	3.61452	3.41417
6.49667	0.32016	0.259628	0.486501	2.30976	1.87593	3.09852	2.14928	3.12619	2.88584	3.49538	3.61435	3.41438
6.5	0.319855	0.259166	0.489193	2.3171	1.8767	3.09814	2.15078	3.12601	2.88607	3.49238	3.61477	3.41579
6.50333	0.317837	0.257779	0.488426	2.32213	1.87888	3.10231	2.14836	3.12501	2.88641	3.49526	3.61534	3.41597
6.50667	0.324468	0.259015	0.491905	2.32361	1.8796	3.10345	2.14513	3.12617	2.88659	3.5013	3.6169	3.41623
6.51	0.315805	0.25857	0.492707	2.32477	1.88202	3.10442	2.14893	3.12525	2.88742	3.49923	3.6161	3.41309
6.51333	0.325375	0.259108	0.493503	2.31988	1.88543	3.10582	2.15066	3.12668	2.88749	3.49147	3.61548	3.41504
6.51667	0.321907	0.260671	0.492298	2.33147	1.88602	3.11152	2.15129	3.12683	2.8878	3.49578	3.61463	3.41612
6.52	0.320626	0.260095	0.49467	2.33668	1.88673	3.11313	2.15459	3.12676	2.88851	3.49923	3.61661	3.41608
6.52333	0.321746	0.259197	0.494014	2.32935	1.88662	3.11677	2.14887	3.12562	2.88819	3.50079	3.6155	3.41453
6.52667	0.322155	0.259111	0.49372	2.33123	1.8853	3.11802	2.14688	3.12633	2.88962	3.48951	3.61555	3.41747
6.53	0.324889	0.259879	0.494781	2.33564	1.88525	3.1215	2.1476	3.12576	2.89099	3.49584	3.61681	3.41343
6.53333	0.322808	0.258043	0.496868	2.33494	1.88808	3.12093	2.14722	3.12661	2.89115	3.48998	3.61481	3.41446
6.53667	0.325399	0.258426	0.495726	2.34337	1.8906	3.12373	2.1578	3.12726	2.89141	3.49176	3.61317	3.4143
6.54	0.321891	0.259498	0.493579	2.34173	1.89444	3.12572	2.14954	3.12806	2.89189	3.49679	3.61275	3.41709
6.54333	0.32296	0.258745	0.494727	2.34352	1.89722	3.13025	2.14718	3.12906	2.89101	3.49867	3.61382	3.41648
6.54667	0.324508	0.259337	0.496116	2.33891	1.89825	3.13044	2.15119	3.12878	2.89012	3.49376	3.61434	3.41745
6.55	0.325336	0.259854	0.496785	2.34139	1.8983	3.13409	2.15618	3.12779	2.89123	3.49337	3.61676	3.41843
6.55333	0.323729	0.260586	0.496185	2.34541	1.89959	3.13575	2.15946	3.12812	2.89062	3.49482	3.61734	3.41771
6.55667	0.327235	0.260959	0.495965	2.3468	1.90118	3.13675	2.14223	3.12994	2.89086	3.49861	3.61613	3.41728
6.56	0.328467	0.261924	0.496777	2.35088	1.90294	3.13727	2.15496	3.13057	2.89191	3.4958	3.61581	3.4172
6.56333	0.320708	0.260469	0.498013	2.3494	1.90481	3.14236	2.1496	3.12939	2.89277	3.4988	3.6148	3.41737
6.56667	0.319648	0.2626	0.494693	2.35453	1.90488	3.14429	2.14323	3.12988	2.89236	3.49948	3.61423	3.41583
6.57	0.321741	0.263164	0.496148	2.35542	1.90669	3.14622	2.15288	3.12946	2.89387	3.49738	3.61543	3.41833
6.57333	0.320863	0.262177	0.497865	2.35925	1.90858	3.14826	2.14805	3.1294	2.89368	3.49481	3.61746	3.41752
6.57667	0.326225	0.263188	0.499555	2.35799	1.90927	3.15188	2.14912	3.12872	2.89212	3.50139	3.61819	3.41653
6.58	0.324299	0.263769	0.497292	2.35794	1.91006	3.15235	2.15364	3.12885	2.89221	3.49338	3.61913	3.41712
6.58333	0.321184	0.262519	0.499947	2.35432	1.91332	3.15286	2.15094	3.13095	2.8913	3.4979	3.62109	3.41882
6.58667	0.32937	0.261578	0.499099	2.35093	1.9139	3.15631	2.15043	3.13327	2.89212	3.4948	3.622	3.41669
6.59	0.324471	0.262841	0.502491	2.36694	1.91452	3.16103	2.15014	3.13194	2.891	3.50042	3.62121	3.41786
6.59333	0.326758	0.26151	0.502681	2.36471	1.91595	3.16221	2.14867	3.13171	2.89238	3.50083	3.62053	3.41851
6.59667	0.323252	0.261739	0.501196	2.36675	1.91797	3.1657	2.15316	3.13381	2.89349	3.50405	3.62005	3.4188
6.6	0.320636	0.263509	0.501677	2.36939	1.91893	3.16894	2.14661	3.13273	2.89521	3.49766	3.61951	3.41814
6.60333	0.327202	0.263805	0.504698	2.37424	1.9211	3.17228	2.15279	3.13121	2.89357	3.49646	3.61643	3.4209
6.60667	0.32306	0.26372	0.504407	2.37337	1.92226	3.17394	2.14935	3.13257	2.89506	3.50355	3.6173	3.42124
6.61	0.328431	0.266376	0.503337	2.37246	1.92288	3.17628	2.15186	3.13216	2.89582	3.50304	3.61815	3.42284
6.61333	0.326896	0.267889	0.505206	2.38107	1.92517	3.18047	2.15039	3.13168	2.89649	3.49902	3.6193	3.42409
6.61667	0.328056	0.266466	0.507098	2.37536	1.9269	3.1839	2.15009	3.13116	2.89632	3.49914	3.61974	3.42232
6.62	0.329786	0.26679	0.507576	2.38454	1.92751	3.18499	2.14888	3.1326	2.89578	3.50105	3.62281	3.42199
6.62333	0.333418	0.265415	0.506087	2.38325	1.92959	3.1888	2.14622	3.13303	2.89593	3.50225	3.62118	3.42316
6.62667	0.331312	0.263417	0.505938	2.3823	1.93066	3.1934	2.15226	3.13379	2.89556	3.49786	3.62197	3.42329
6.63	0.324834	0.26262	0.506837	2.3894	1.93219	3.19656	2.15723	3.13454	2.89528	3.50173	3.62055	3.4221
6.63333	0.322745	0.262175	0.508891	2.38531	1.93569	3.19883	2.15164	3.13569	2.89397	3.49972	3.62165	3.42634
6.63667	0.32341	0.264202	0.508248	2.38881	1.93745	3.20082	2.15698	3.13685	2.89487	3.49982	3.61903	3.42238
6.64	0.32335	0.266332	0.507034	2.39684	1.93802	3.20364	2.15053	3.13662	2.89456	3.50027	3.624	3.42182
6.64333	0.332839	0.267532	0.506658	2.39264	1.94218	3.20407	2.15339	3.13634	2.89585	3.49442	3.62306	3.41986
6.64667	0.324339	0.267719	0.509468	2.39732	1.94333	3.20378	2.15448	3.13621	2.89521	3.50258	3.62385	3.42093
6.65	0.32788	0.268002	0.506351	2.39808	1.94217	3.20766	2.15371	3.13613	2.89498	3.50124	3.62313	3.42051
6.65333	0.326082	0.267187	0.506022	2.39879	1.94271	3.21095	2.15161	3.13535	2.8932	3.49648	3.62495	3.42438
6.65667	0.328797	0.266575	0.507662	2.39769	1.94579	3.21146	2.14681	3.1347	2.89491	3.49767	3.62205	3.4231
6.66	0.323097	0.267367	0.508675	2.40756	1.94591	3.21547	2.15042	3.13659	2.89587	3.49749	3.62446	3.42566
[truncated: 24,999 more rows]
