# Supplementary material for: Early steps of protein disaggregation by Hsp70 chaperone and class B J-domain proteins are shaped by Hsp110
Source: eLife. 2024 Oct 15;13:RP94795. doi: 10.7554/eLife.94795 (PMC11479587; doi:10.7554/eLife.94795)
Supplement: Figure 2—figure supplement 1—source data 1. [file elife-94795-fig2-figsupp1-data1.xlsx]

## Sheet: Figure 2—figure supplement 1A
	Ssa1, Sis1			Ssa1, Sis1, Sse1			Ssa1, Ydj1			Ssa1, Ydj1, Sse1			Ssa1, Sis1, Hsp104			Ssa1, Sis1, Sse1, Hsp104			Ssa1, Ydj1, Hsp104			Ssa1, Ydj1, Sse1, Hsp104
activity (%)	1.09	0.96	1.09	1.31	1.16	0.78	0.34	0.31	0.24	0.18	0.19	0.19	6.18	5.6	4.34	13.91	14.14	10.71	2.61	2.69	1.9	0.78	1.03	0.91
