# Supplementary material for: Early steps of protein disaggregation by Hsp70 chaperone and class B J-domain proteins are shaped by Hsp110
Source: eLife. 2024 Oct 15;13:RP94795. doi: 10.7554/eLife.94795 (PMC11479587; doi:10.7554/eLife.94795)
Supplement: Figure 2—figure supplement 1—source data 2. [file elife-94795-fig2-figsupp1-data2.xlsx]

## Sheet: Figure 2—figure supplement 1B
Volume (%)	Ssa1, Sis1			Ssa1, Sis1, Sse1			Ssa1, Ydj1			Ssa1, Ydj1, Sse1				Volume	Luc agg			Luc agg 60'					Luc agg + Ssa1, Sis1, Sse1 no ATP 0			Luc agg + Ssa1, Sis1, Sse1 no ATP 60'					Native Luc			Native Luc + Ssa1, Sis1, Sse1			Ssa1, Sis1, Sse1
	Mean	SD	N	Mean	SD	N	Mean	SD	N	Mean	SD	N			Mean	SD	N	Mean	SD	N			Mean	SD	N	Mean	SD	N			Mean	SD	N	Mean	SD	N	Mean	SD	N
0.4	0	0	3	0	0	3	0	0	3	0	0	3		0.4	0	0	3	0	0	3		0.4	0	0	3	0	0	3		0.4	0	0	3	0	0	3	0	0	3
0.463	0	0	3	0	0	3	0	0	3	0	0	3		0.463	0	0	3	0	0	3		0.463	0	0	3	0	0	3		0.463	0	0	3	0	0	3	0	0	3
0.536	0	0	3	0	0	3	0	0	3	0	0	3		0.536	0	0	3	0	0	3		0.536	0	0	3	0	0	3		0.536	0	0	3	0	0	3	0	0	3
0.621	0	0	3	0	0	3	0	0	3	0	0	3		0.621	0	0	3	0	0	3		0.621	0	0	3	0	0	3		0.621	0	0	3	0	0	3	0	0	3
0.719	0	0	3	0	0	3	0	0	3	0	0	3		0.719	0	0	3	0	0	3		0.719	0	0	3	0	0	3		0.719	0	0	3	0	0	3	0	0	3
0.833	0	0	3	0	0	3	0	0	3	0	0	3		0.833	0	0	3	0	0	3		0.833	0	0	3	0	0	3		0.833	0	0	3	0	0	3	0	0	3
0.965	0	0	3	0	0	3	0	0	3	0	0	3		0.965	0	0	3	0	0	3		0.965	0	0	3	0	0	3		0.965	0	0	3	0	0	3	0	0	3
1.12	0	0	3	0	0	3	0	0	3	0	0	3		1.12	0	0	3	0	0	3		1.12	0	0	3	0	0	3		1.12	0	0	3	0	0	3	0	0	3
1.29	0	0	3	0	0	3	0	0	3	0	0	3		1.29	0	0	3	0	0	3		1.29	0	0	3	0	0	3		1.29	0	0	3	0	0	3	0	0	3
1.5	0	0	3	0	0	3	0	0	3	0	0	3		1.5	0	0	3	0	0	3		1.5	0	0	3	0	0	3		1.5	0	0	3	0	0	3	0	0	3
1.74	0	0	3	0	0	3	0	0	3	0	0	3		1.74	0	0	3	0	0	3		1.74	0	0	3	0	0	3		1.74	0	0	3	0	0	3	0	0	3
2.01	0	0	3	0	0	3	0	0	3	0	0	3		2.01	0	0	3	0	0	3		2.01	0	0	3	0	0	3		2.01	0	0	3	0	0	3	0	0	3
2.33	0	0	3	0	0	3	0	0	3	0	0	3		2.33	0	0	3	0	0	3		2.33	0	0	3	0	0	3		2.33	0	0	3	0	0	3	0	0	3
2.7	0	0	3	0	0	3	0	0	3	0	0	3		2.7	0	0	3	0	0	3		2.7	0	0	3	0	0	3		2.7	0	0	3	0	0	3	0	0	3
3.12	0	0	3	0	0	3	0	0	3	0	0	3		3.12	0	0	3	0	0	3		3.12	0	0	3	0	0	3		3.12	0.018533	0.032101	3	0	0	3	0	0	3
3.62	0	0	3	0	0	3	0	0	3	0	0	3		3.62	0	0	3	0	0	3		3.62	0	0	3	0	0	3		3.62	1.723	0.829781	3	0	0	3	0	0	3
4.19	0	0	3	0	0	3	0	0	3	0	0	3		4.19	0	0	3	0	0	3		4.19	0	0	3	0	0	3		4.19	7.38	2.10478	3	0.096	0.166277	3	0	0	3
4.85	0	0	3	0	0	3	0	0	3	0	0	3		4.85	0	0	3	0	0	3		4.85	0	0	3	0	0	3		4.85	14.8667	1.8037	3	1.86	0.770195	3	0.523333	0.90644	3
5.61	0	0	3	0	0	3	0	0	3	0	0	3		5.61	0	0	3	0	0	3		5.61	0	0	3	0	0	3		5.61	19.3667	0.416333	3	7.12667	1.38001	3	2.22333	3.85093	3
6.5	0	0	3	0	0	3	0	0	3	0	0	3		6.5	0	0	3	0	0	3		6.5	0	0	3	0	0	3		6.5	19.0667	1.25033	3	13.8333	0.896289	3	7.03	5.3434	3
7.53	0	0	3	0	0	3	0	0	3	0	0	3		7.53	0	0	3	0	0	3		7.53	0	0	3	0	0	3		7.53	15.4	1.53948	3	17.9667	0.351188	3	16.2333	1.12398	3
8.72	0	0	3	0	0	3	0	0	3	0	0	3		8.72	0	0	3	0	0	3		8.72	0	0	3	0	0	3		8.72	10.5633	1.20625	3	17.9667	0.929157	3	23.6	5.89491	3
10.1	0	0	3	0	0	3	0	0	3	0	0	3		10.1	0	0	3	0	0	3		10.1	0	0	3	0	0	3		10.1	6.25667	0.705998	3	14.9667	0.907377	3	22.1333	6.85006	3
11.7	0	0	3	0	0	3	0	0	3	0	0	3		11.7	0	0	3	0	0	3		11.7	0	0	3	0	0	3		11.7	3.18333	0.332014	3	10.8	0.52915	3	14.2333	3.48186	3
13.5	0	0	3	0	0	3	0	0	3	0	0	3		13.5	0	0	3	0	0	3		13.5	0	0	3	0	0	3		13.5	1.36	0.150997	3	6.90667	0.255799	3	6.61	1.72988	3
15.7	0.0131	0.02269	3	0.0053	0.00918	3	0	0	3	0	0	3		15.7	0	0	3	0	0	3		15.7	0	0	3	0	0	3		15.7	0.462667	0.08399	3	3.94	0.081854	3	2.44533	1.73037	3
18.2	0.2637	0.3758	3	0.272667	0.472273	3	0	0	3	0	0	3		18.2	0	0	3	0	0	3		18.2	0	0	3	0	0	3		18.2	0.111433	0.038914	3	2.01	0.034641	3	0.943333	1.31074	3
21	0.900667	1.09534	3	1.04	1.80133	3	0	0	3	0	0	3		21	0	0	3	0	0	3		21	0	0	3	0	0	3		21	0.01462	0.009272	3	0.918	0.036497	3	0.503333	0.871799	3
24.4	1.49333	1.51547	3	2.10033	3.10748	3	0	0	3	0	0	3		24.4	0	0	3	0	0	3		24.4	0	0	3	0	0	3		24.4	0.000308	0.000267	3	0.389	0.042532	3	0.35	0.606218	3
28.2	1.61	1.43168	3	3.21967	3.34263	3	0	0	3	0	0	3		28.2	0	0	3	0	0	3		28.2	0	0	3	0	0	3		28.2	0.000664	0.000576	3	0.178667	0.044837	3	0.273155	0.472716	3
32.7	1.33333	1.1582	3	4.06	2.62966	3	0	0	3	0	0	3		32.7	0	0	3	0	0	3		32.7	0	0	3	0	0	3		32.7	0.003403	0.002406	3	0.118833	0.039763	3	0.2564	0.370349	3
37.8	0.951667	0.825868	3	4.18333	1.56721	3	0	0	3	0.000897	0.001553	3		37.8	0	0	3	0	0	3		37.8	0	0	3	0	0	3		37.8	0.008493	0.004169	3	0.112833	0.029767	3	0.344333	0.21976	3
43.8	0.667	0.454664	3	3.58333	0.660101	3	0	0	3	0.008833	0.0153	3		43.8	0	0	3	0	0	3		43.8	0	0	3	0	0	3		43.8	0.014307	0.004049	3	0.1154	0.019649	3	0.511333	0.050639	3
50.7	0.533333	0.156564	3	2.60667	0.191398	3	0	0	3	0.026267	0.045495	3		50.7	0	0	3	0	0	3		50.7	0	0	3	0	0	3		50.7	0.0186	0.00239	3	0.1109	0.012338	3	0.607	0.250054	3
58.8	0.486667	0.211022	3	1.64333	0.248261	3	0	0	3	0.041	0.071014	3		58.8	0	0	3	0	0	3		58.8	0	0	3	0	0	3		58.8	0.0202	0.001442	3	0.0985	0.009014	3	0.536	0.31166	3
68.1	0.446667	0.285659	3	0.892333	0.26231	3	0	0	3	0.043	0.074478	3		68.1	0.00168	0.00291	3	0	0	3		68.1	0	0	3	0	0	3		68.1	0.0196	0.0022	3	0.0808	0.007333	3	0.352333	0.221597	3
78.8	0.381	0.261006	3	0.420667	0.19851	3	0	0	3	0.035	0.060622	3		78.8	0.009133	0.015819	3	0	0	3		78.8	0	0	3	0	0	3		78.8	0.017467	0.002732	3	0.062733	0.006352	3	0.168667	0.094156	3
91.3	0.293667	0.186736	3	0.181633	0.125665	3	0	0	3	0.024114	0.041644	3		91.3	0.021733	0.037643	3	0	0	3		91.3	0	0	3	0	0	3		91.3	0.014733	0.002765	3	0.0466	0.00526	3	0.059267	0.034537	3
106	0.203667	0.109418	3	0.1027	0.085839	3	0	0	3	0.016687	0.025221	3		106	0.0317	0.054906	3	0	0	3		106	0	0	3	0	0	3		106	0.012033	0.002401	3	0.033567	0.004174	3	0.020754	0.029974	3
122	0.1272	0.060907	3	0.123533	0.076907	3	0.000149	0.000258	3	0.015867	0.015287	3		122	0.033667	0.058312	3	0	0	3		122	0	0	3	0	0	3		122	0.00965	0.001863	3	0.023833	0.003233	3	0.0115	0.019919	3
142	0.071767	0.046298	3	0.210667	0.078564	3	0.001457	0.002523	3	0.019967	0.017855	3		142	0.028767	0.049825	3	0	0	3		142	0	0	3	0	0	3		142	0.00787	0.001363	3	0.017	0.0025	3	0.0071	0.012298	3
164	0.038673	0.039919	3	0.363	0.088391	3	0.0055	0.009526	3	0.0259	0.025093	3		164	0.021473	0.034779	3	0	0	3		164	0	0	3	0	0	3		164	0.00672	0.000874	3	0.012533	0.001976	3	0.004333	0.007506	3
190	0.024823	0.024954	3	0.594333	0.104644	3	0.0124	0.021477	3	0.031033	0.03028	3		190	0.0189	0.017521	3	0	0	3		190	0	0	3	0	0	3		190	0.006057	0.000483	3	0.009607	0.001732	3	0.002597	0.004498	3
220	0.029467	0.028457	3	0.907333	0.128099	3	0.0204	0.035334	3	0.034977	0.026689	3		220	0.029167	0.039794	3	0	0	3		220	0	0	3	0	0	3		220	0.005487	0.00062	3	0.007183	0.001539	3	0.00138	0.00239	3
255	0.063087	0.071433	3	1.30333	0.165025	3	0.026967	0.046708	3	0.041367	0.010005	3		255	0.055733	0.087014	3	0	0	3		255	0	0	3	0	0	3		255	0.004837	0.001185	3	0.00496	0.001363	3	0.000557	0.000964	3
295	0.1524	0.125165	3	1.79333	0.228983	3	0.03132	0.051706	3	0.053233	0.038992	3		295	0.098667	0.12852	3	0	0	3		295	0	0	3	0	0	3		295	0.004173	0.001789	3	0.003053	0.00118	3	0.000137	0.000237	3
342	0.334667	0.185883	3	2.41667	0.332014	3	0.041267	0.046919	3	0.071633	0.079064	3		342	0.159667	0.156596	3	0	0	3		342	0	0	3	0	0	3		342	0.003577	0.002271	3	0.001583	0.000945	3	1.19e-05	2.07e-05	3
396	0.643333	0.256637	3	3.14667	0.475009	3	0.086067	0.057298	3	0.1009	0.090564	3		396	0.242667	0.211637	3	0	0	3		396	0	0	3	0	0	3		396	0.003054	0.002471	3	0.00063	0.000603	3	0	0	3
459	1.094	0.337325	3	3.89667	0.624046	3	0.225	0.142717	3	0.155633	0.053484	3		459	0.354333	0.375548	3	0	0	3		459	0	0	3	0	0	3		459	0.002539	0.002294	3	0.00021	0.000217	3	0	0	3
531	1.73	0.441362	3	4.65667	0.759627	3	0.549333	0.309453	3	0.275667	0.155507	3		531	0.526333	0.676957	3	0	0	3		531	0.024733	0.042839	3	0	0	3		531	0.00201	0.001886	3	0.000245	0.00036	3	0	0	3
615	2.66	0.570877	3	5.58	0.876071	3	1.20333	0.583809	3	0.5469	0.45211	3		615	0.836667	1.14378	3	0.013667	0.023671	3		615	0.151	0.26154	3	0	0	3		615	0.001493	0.001434	3	0.000683	0.001184	3	0	0	3
712	3.90667	0.733235	3	6.54333	0.928781	3	2.3	0.956452	3	1.0782	0.897086	3		712	1.34967	1.75229	3	0.137667	0.139691	3		712	0.466667	0.80829	3	0	0	3		712	0.00099	0.00098	3	0.001547	0.002679	3	0	0	3
825	5.23	0.867468	3	7.09333	0.892039	3	3.78667	1.32259	3	1.92933	1.39803	3		825	2.101	2.35375	3	0.638	0.36388	3		825	1.251	1.51158	3	0.096667	0.088596	3		825	0.000509	0.000531	3	0.002803	0.004856	3	0	0	3
955	6.37	0.920163	3	6.97667	0.964797	3	5.46333	1.54733	3	3.09667	1.80857	3		955	3.18633	2.65629	3	1.83	0.564269	3		955	3.11667	1.73275	3	1.50833	1.7725	3		955	0.000168	0.000194	3	0.004333	0.007506	3	0	0	3
1110	7.33667	0.906936	3	6.40667	1.36647	3	7.24333	1.55359	3	4.62667	2.04089	3		1110	4.82	2.36913	3	3.88	0.612454	3		1110	6.55	1.42927	3	6.17	6.52439	3		1110	4.27e-05	3.71e-05	3	0.0061	0.010566	3	0	0	3
1280	8.29	0.849647	3	5.69667	1.9886	3	9.2	1.30778	3	6.64333	2.05213	3		1280	7.21	1.39871	3	6.75	0.533948	3		1280	11.2833	2.46086	3	13.3167	11.1144	3		1280	0.000102	0.000177	3	0.008233	0.014261	3	0	0	3
1480	9.38333	0.744603	3	5.01333	2.65108	3	11.4333	0.723418	3	9.38	1.77798	3		1480	10.4667	0.305505	3	10.3667	0.404145	3		1480	16.2333	4.2004	3	19.0833	10.4262	3		1480	0.00033	0.000572	3	0.010941	0.018844	3	0	0	3
1720	10.7667	0.550757	3	4.469	3.17687	3	14.1	0.2	3	13.1667	1.0116	3		1720	14.6667	2.21209	3	14.7	0.43589	3		1720	19.9333	4.65224	3	20.3667	6.40416	3		1720	0.000874	0.001359	3	0.014995	0.0246	3	0	0	3
1990	10.9667	0.378594	3	3.70933	3.0669	3	15.0667	1.25033	3	15.8333	0.152753	3		1990	17.1333	3.65011	3	17	0.8544	3		1990	18.7333	2.89885	3	16.51	9.36271	3		1990	0.001718	0.002239	3	0.01862	0.027092	3	0.000211	0.000365	3
2300	8.68667	0.147422	3	2.44667	2.14143	3	12.2667	1.85023	3	14.5667	1.43643	3		2300	14.7	3.4176	3	14.5667	1.10151	3		2300	11.6533	2.02596	3	10.1203	8.54632	3		2300	0.002507	0.002679	3	0.018853	0.021784	3	0.001007	0.001744	3
2670	5.51667	0.162583	3	1.26667	1.17823	3	7.85	1.8189	3	10.7667	2.13001	3		2670	9.77667	2.0815	3	9.85667	1.03905	3		2670	4.82333	3.0355	3	5.12	6.40353	3		2670	0.002927	0.0027	3	0.01646	0.012772	3	0.00221	0.003828	3
3090	3.18	0.183576	3	0.583667	0.635091	3	4.43	1.39603	3	7.14	2.16723	3		3090	5.59	1.00881	3	6.21333	0.581578	3		3090	1.79533	2.4143	3	2.73833	4.61793	3		3090	0.003148	0.002325	3	0.013667	0.005404	3	0.003333	0.005774	3
3580	1.79	0.176918	3	0.261	0.359459	3	2.35667	0.944475	3	4.54667	1.93975	3		3580	2.98333	0.582866	3	4.24	0.530283	3		3580	0.87	1.50688	3	1.76333	3.05418	3		3580	0.00352	0.001345	3	0.0113	0.0007	3	0.004067	0.007044	3
4150	1.00833	0.16007	3	0.127033	0.207089	3	1.22133	0.588953	3	2.8	1.56703	3		4150	1.62333	0.334863	3	3.36333	1.06232	3		4150	0.634333	0.842298	3	1.21667	2.10733	3		4150	0.003927	0.000734	3	0.008993	0.001675	3	0.004167	0.007217	3
4800	0.582333	0.161735	3	0.068667	0.118934	3	0.630333	0.390929	3	1.68733	1.21838	3		4800	1.032	0.236837	3	3.15333	1.63127	3		4800	0.948	0.796249	3	0.988333	1.59636	3		4800	0.004387	0.002199	3	0.007197	0.002815	3	0.004	0.006928	3
5560	0.321333	0.127379	3	0.037333	0.064663	3	0.324033	0.262466	3	0.932667	0.795765	3		5560	0.681333	0.352592	3	2.46	1.50143	3		5560	1.08967	1.15386	3	0.749667	1.07395	3		5560	0.00358	0.00243	3	0.004827	0.002434	3	0.002967	0.005138	3
6440	0.093533	0.043753	3	0.010767	0.018648	3	0.09167	0.086416	3	0.268	0.248815	3		6440	0.224667	0.154649	3	0.849333	0.54532	3		6440	0.451	0.513904	3	0.262333	0.344146	3		6440	0.001244	0.000934	3	0.001535	0.000849	3	0.000983	0.001703	3
7460	0	0	3	0	0	3	0	0	3	0	0	3		7460	0	0	3	0	0	3		7460	0	0	3	0	0	3		7460	0	0	3	0	0	3	0	0	3
8630	0	0	3	0	0	3	0	0	3	0	0	3		8630	0	0	3	0	0	3		8630	0	0	3	0	0	3		8630	0	0	3	0	0	3	0	0	3
