# Supplementary material for: Early steps of protein disaggregation by Hsp70 chaperone and class B J-domain proteins are shaped by Hsp110
Source: eLife. 2024 Oct 15;13:RP94795. doi: 10.7554/eLife.94795 (PMC11479587; doi:10.7554/eLife.94795)
Supplement: Figure 2—source data 1. [file elife-94795-fig2-data1.xlsx]

## Sheet: Fig 2A
Time (min)	Hsp104 D484K_F508A	Hsp104 D484K_F508A	Hsp104 D484K_F508A	0' incubation with Ssa1, Ydj1 +Hsp104 D484K_F508A	0' incubation with Ssa1, Ydj1 +Hsp104 D484K_F508A	0' incubation with Ssa1, Ydj1 +Hsp104 D484K_F508A	0' incubation with Ssa1, Ydj1, Sse1 +Hsp104 D484K_F508A	0' incubation with Ssa1, Ydj1, Sse1 +Hsp104 D484K_F508A	0' incubation with Ssa1, Ydj1, Sse1 +Hsp104 D484K_F508A	60' incubation with Ssa1, Ydj1 +Hsp104 D484K_F508A	60' incubation with Ssa1, Ydj1 +Hsp104 D484K_F508A	60' incubation with Ssa1, Ydj1 +Hsp104 D484K_F508A	60' incubation with Ssa1, Ydj1, Sse1 +Hsp104 D484K_F508A	60' incubation with Ssa1, Ydj1, Sse1 +Hsp104 D484K_F508A	60' incubation with Ssa1, Ydj1, Sse1 +Hsp104 D484K_F508A	Ssa1, Ydj1	Ssa1, Ydj1	Ssa1, Ydj1	Ssa1, Ydj1, Sse1	Ssa1, Ydj1, Sse1	Ssa1, Ydj1, Sse1	Hsp104 D484K_F508A	Hsp104 D484K_F508A	Hsp104 D484K_F508A	0' incubation with Ssa1, Sis1+Hsp104 D484K_F508A	0' incubation with Ssa1, Sis1+Hsp104 D484K_F508A	0' incubation with Ssa1, Sis1+Hsp104 D484K_F508A	0' incubation with Ssa1, Sis1, Sse1 +Hsp104 D484K_F508A	0' incubation with Ssa1, Sis1, Sse1 +Hsp104 D484K_F508A	0' incubation with Ssa1, Sis1, Sse1 +Hsp104 D484K_F508A	60' incubation with Ssa1, Sis1+Hsp104 D484K_F508A	60' incubation with Ssa1, Sis1+Hsp104 D484K_F508A	60' incubation with Ssa1, Sis1+Hsp104 D484K_F508A	60' incubation with Ssa1, Sis1, Sse1 +Hsp104 D484K_F508A	60' incubation with Ssa1, Sis1, Sse1 +Hsp104 D484K_F508A	60' incubation with Ssa1, Sis1, Sse1 +Hsp104 D484K_F508A	Ssa1, Sis1	Ssa1, Sis1	Ssa1, Sis1	Ssa1, Sis1, Sse1	Ssa1, Sis1, Sse1	Ssa1, Sis1, Sse1
-60	0.613753	0.578009	0.646497							0.661065	0.642286	0.706708	0.64427	0.63367	0.678998							0.613753	0.578009	0.646497							0.675271	0.641366	0.687323	0.703997	0.642213	0.706732
-58	0.612979	0.570022	0.640882							0.658137	0.65758	0.713315	0.654289	0.636695	0.69422							0.612979	0.570022	0.640882							0.686645	0.640979	0.689864	0.720551	0.649013	0.701432
-56	0.607606	0.578081	0.640882							0.667745	0.651579	0.716049	0.665131	0.642165	0.69589							0.607606	0.578081	0.640882							0.680692	0.647295	0.68333	0.725439	0.652014	0.726383
-54	0.60475	0.570313	0.64352							0.673238	0.651167	0.717453	0.67653	0.660436	0.699036							0.60475	0.570313	0.64352							0.677183	0.637518	0.69226	0.727448	0.687759	0.741654
-52	0.61051	0.566973	0.633404							0.673262	0.662179	0.736402	0.674497	0.65988	0.703876							0.61051	0.566973	0.633404							0.688049	0.660872	0.688073	0.749519	0.711959	0.766072
-50	0.59991	0.568474	0.64214							0.6691	0.673698	0.745405	0.694801	0.677207	0.729384							0.59991	0.568474	0.64214							0.693155	0.655572	0.688969	0.774687	0.738217	0.798912
-48	0.609808	0.568377	0.647852							0.687662	0.683064	0.763241	0.710677	0.693809	0.758618							0.609808	0.568377	0.647852							0.69318	0.65971	0.705401	0.833931	0.799421	0.85772
-46	0.615253	0.568038	0.651579							0.702376	0.70315	0.762345	0.722559	0.711621	0.762176							0.615253	0.568038	0.651579							0.705014	0.683403	0.710217	0.880662	0.860334	0.927418
-44	0.61431	0.572418	0.646908							0.708063	0.768565	0.774857	0.740032	0.734321	0.773695							0.61431	0.572418	0.646908							0.730691	0.703538	0.73161	0.944988	0.938163	0.996366
-42	0.624353	0.576774	0.655814							0.727908	0.828074	0.793274	0.755642	0.753657	0.795863							0.624353	0.576774	0.655814							0.73449	0.70862	0.744146	1.01064	1.0166	1.07216
-40	0.617819	0.58522	0.654555							0.728609	0.764596	0.803244	0.762006	0.77384	0.817692							0.617819	0.58522	0.654555							0.762006	0.727133	0.769073	1.07664	1.10309	1.14922
-38	0.626071	0.586285	0.667479							0.752616	0.742283	0.811545	0.787562	0.782238	0.839352							0.626071	0.586285	0.667479							0.78219	0.756537	0.790587	1.14888	1.1688	1.22242
-36	0.632968	0.591755	0.663437							0.748527	0.753778	0.826041	0.819338	0.796516	0.856437							0.632968	0.591755	0.663437							0.804164	0.773066	0.819797	1.21855	1.26625	1.31707
-34	0.622078	0.580743	0.664236							0.771759	0.755133	0.83819	0.831293	0.808084	0.869602							0.622078	0.580743	0.664236							0.816482	0.801937	0.829381	1.28365	1.3217	1.38483
-32	0.635316	0.592384	0.666801							0.777809	0.77718	0.842062	0.837416	0.834148	0.902346							0.635316	0.592384	0.666801							0.842014	0.828437	0.863528	1.36071	1.38571	1.44553
-30	0.642745	0.58931	0.668326							0.788579	0.793249	0.861132	0.858954	0.846346	0.894287							0.642745	0.58931	0.668326							0.874733	0.861181	0.892036	1.40766	1.44751	1.52251
-28	0.644415	0.589504	0.677861							0.786086	0.797073	0.878266	0.885502	0.858857	0.917592							0.644415	0.589504	0.677861							0.898982	0.880832	0.914228	1.46692	1.50376	1.58848
-26	0.637445	0.595046	0.673916							0.807165	0.801816	0.877032	0.888479	0.873136	0.924078							0.637445	0.595046	0.673916							0.914132	0.904476	0.95445	1.5237	1.55944	1.63529
-24	0.646811	0.601387	0.668931							0.810287	0.810553	0.893561	0.912607	0.885188	0.938453							0.646811	0.601387	0.668931							0.951425	0.939325	0.980224	1.58829	1.62111	1.68371
-22	0.649812	0.603032	0.683161							0.817329	0.822508	0.901305	0.911566	0.905879	0.958951							0.649812	0.603032	0.683161							0.963767	0.95641	1.00479	1.63175	1.65975	1.7589
-20	0.661622	0.614213	0.687396							0.833301	0.822992	0.910719	0.920279	0.908541	0.980224							0.661622	0.614213	0.687396							0.994817	0.99547	1.02925	1.68703	1.71333	1.79608
-18	0.659129	0.609663	0.689671							0.840562	0.842812	0.914422	0.941478	0.925409	0.974851							0.659129	0.609663	0.689671							1.03271	1.0126	1.04777	1.7165	1.75641	1.84852
-16	0.655838	0.616076	0.69923							0.838843	0.839957	0.931919	0.954256	0.938115	1.01222							0.655838	0.616076	0.69923							1.04448	1.01744	1.08617	1.77493	1.81152	1.90241
-14	0.653418	0.617795	0.690009							0.854114	0.849734	0.922166	0.971899	0.945786	1.01638							0.653418	0.617795	0.690009							1.07279	1.05842	1.10314	1.81759	1.8362	1.9612
-12	0.657943	0.619779	0.686694							0.860987	0.848669	0.942906	0.964445	0.955128	1.02318							0.657943	0.619779	0.686694							1.08576	1.07318	1.11933	1.85767	1.87877	1.98847
-10	0.651482	0.608066	0.69606							0.867836	0.870667	0.949561	0.978409	0.968849	1.02333							0.651482	0.608066	0.69606							1.10999	1.09675	1.15529	1.88492	1.92308	2.0277
-8	0.657629	0.622465	0.700149							0.870691	0.85847	0.958879	0.992687	0.979014	1.04566							0.657629	0.622465	0.700149							1.12707	1.13474	1.17412	1.92427	1.94561	2.06645
-6	0.662759	0.622465	0.696907							0.860285	0.870304	0.970011	1.01193	0.995543	1.06115							0.662759	0.622465	0.696907							1.16282	1.14222	1.21359	1.93746	1.99322	2.10751
-4	0.665276	0.623095	0.702981							0.87512	0.886349	0.961033	1.01694	0.991017	1.05648							0.665276	0.623095	0.702981							1.17857	1.15333	1.2353	1.98707	2.01575	2.14815
-2	0.675852	0.629024	0.710846							0.883566	0.881437	0.961517	1.01769	0.988016	1.07018							0.675852	0.629024	0.710846							1.19205	1.18605	1.24099	2.02172	2.05798	2.1686
0	0.667454	0.630911	0.713073							0.89073	0.873838	0.981313	1.03049	1.01127	1.08397							0.667454	0.630911	0.713073							1.20899	1.20604	1.26315	2.04145	2.07724	2.20059
2	1.41601	1.29834	0.851646	0.938768	0.86953	0.775123	0.942737	0.903266	0.754964	1.22736	1.25241	1.22322	1.59879	1.73015	1.3548	0.661065	0.642286	0.706708	0.64427	0.63367	0.678998	1.41601	1.29834	0.851646	0.746106	0.616125	0.668471	0.739596	0.651337	0.67244	2.08936	2.13866	1.65736	3.89152	3.08413	2.92015	0.675271	0.641366	0.687323	0.703997	0.642213	0.706732
4	1.58147	1.54516	0.9446	1.02645	0.944818	0.807915	1.034	1.02001	0.830349	1.29781	1.33435	1.30054	1.68091	1.8431	1.43437	0.658137	0.65758	0.713315	0.654289	0.636695	0.69422	1.58147	1.54516	0.9446	0.789861	0.654967	0.715226	0.813989	0.740516	0.761159	2.29401	2.50738	1.78417	4.38986	3.59544	3.19734	0.686645	0.640979	0.689864	0.720551	0.649013	0.701432
6	1.87434	1.85283	1.11899	1.13271	1.09302	0.910405	1.19551	1.20621	0.941115	1.39955	1.49049	1.46102	1.83456	2.04999	1.58546	0.667745	0.651579	0.716049	0.665131	0.642165	0.69589	1.87434	1.85283	1.11899	0.870498	0.727085	0.830131	0.960379	0.914253	0.916189	2.65263	3.06877	2.02848	5.31582	4.66373	3.76579	0.680692	0.647295	0.68333	0.725439	0.652014	0.726383
8	2.29657	2.36477	1.44647	1.3186	1.30175	1.07618	1.41388	1.48592	1.12248	1.56554	1.70213	1.70941	2.08247	2.32123	1.83775	0.673238	0.651167	0.717453	0.67653	0.660436	0.699036	2.29657	2.36477	1.44647	1.00123	0.86394	0.971003	1.26509	1.27119	1.3164	3.14672	3.83474	2.42689	6.72609	6.57443	4.70901	0.677183	0.637518	0.69226	0.727448	0.687759	0.741654
10	2.79825	3.00173	1.89569	1.54417	1.59482	1.34846	1.73458	1.88765	1.4418	1.83124	1.96962	2.06151	2.41932	2.7347	2.2282	0.673262	0.662179	0.736402	0.674497	0.65988	0.703876	2.79825	3.00173	1.89569	1.20277	1.07306	1.18247	1.85128	1.96594	2.05178	3.75507	4.76102	2.97112	8.76122	9.28778	6.30098	0.688049	0.660872	0.688073	0.749519	0.711959	0.766072
12	3.4084	3.71984	2.45828	1.86962	1.9415	1.67072	2.12085	2.39374	1.85474	2.16243	2.33904	2.49538	2.91117	3.28277	2.74603	0.6691	0.673698	0.745405	0.694801	0.677207	0.729384	3.4084	3.71984	2.45828	1.48403	1.33559	1.48759	2.83504	3.14446	3.31801	4.55067	5.80262	3.71746	11.5039	12.7903	8.64581	0.693155	0.655572	0.688969	0.774687	0.738217	0.798912
14	4.10073	4.46103	3.12479	2.21424	2.32803	2.06601	2.6234	2.97216	2.37283	2.53216	2.74293	2.98801	3.49286	3.99727	3.40208	0.687662	0.683064	0.763241	0.710677	0.693809	0.758618	4.10073	4.46103	3.12479	1.82495	1.68139	1.86043	4.28366	4.78345	5.09777	5.41577	6.82902	4.5399	14.7825	16.5146	11.6116	0.69318	0.65971	0.705401	0.833931	0.799421	0.85772
16	4.78537	5.24399	3.88167	2.61858	2.7603	2.5226	3.13423	3.63922	2.9572	2.97857	3.20601	3.57773	4.15518	4.70069	4.08546	0.702376	0.70315	0.762345	0.722559	0.711621	0.762176	4.78537	5.24399	3.88167	2.2433	2.08515	2.35189	6.17352	6.96899	7.36504	6.32617	7.80905	5.49036	18.2369	19.989	15.1468	0.705014	0.683403	0.710217	0.880662	0.860334	0.927418
18	5.55865	5.95803	4.66923	3.02917	3.19674	2.99307	3.70207	4.21849	3.56631	3.4553	3.65566	4.08652	4.85928	5.4565	4.8464	0.708063	0.768565	0.774857	0.740032	0.734321	0.773695	5.55865	5.95803	4.66923	2.68855	2.53817	2.81964	8.24829	9.48802	9.8875	7.2246	8.74484	6.44919	21.6543	23.0041	18.7099	0.730691	0.703538	0.73161	0.944988	0.938163	0.996366
20	6.26906	6.57363	5.46395	3.41856	3.56846	3.4371	4.27979	4.83263	4.23386	3.92022	4.13899	4.62351	5.62694	6.20812	5.58825	0.727908	0.828074	0.793274	0.755642	0.753657	0.795863	6.26906	6.57363	5.46395	3.16007	3.01908	3.32991	10.4908	12.0695	12.4308	8.11727	9.55866	7.43062	24.7276	25.5253	22.1837	0.73449	0.70862	0.744146	1.01064	1.0166	1.07216
22	6.88395	7.17976	6.17332	3.79532	3.96083	3.87772	4.87406	5.4435	4.86068	4.35767	4.58675	5.15046	6.33496	6.92882	6.30851	0.728609	0.764596	0.803244	0.762006	0.77384	0.817692	6.88395	7.17976	6.17332	3.62553	3.47512	3.87658	12.6988	14.5468	14.9624	8.93692	10.3027	8.33084	27.5895	27.6126	25.3576	0.762006	0.727133	0.769073	1.07664	1.10309	1.14922
24	7.47251	7.67597	6.85106	4.18386	4.28482	4.29843	5.44355	5.96525	5.50347	4.82162	4.95876	5.63215	7.0717	7.6524	7.03112	0.752616	0.742283	0.811545	0.787562	0.782238	0.839352	7.47251	7.67597	6.85106	4.082	3.92924	4.36379	14.8481	16.9088	17.3167	9.72475	10.9102	9.14742	30.018	29.5615	28.1573	0.78219	0.756537	0.790587	1.14888	1.1688	1.22242
26	7.98344	8.03087	7.42457	4.52427	4.61107	4.70967	5.9386	6.45499	6.10984	5.25532	5.31902	6.053	7.75462	8.28771	7.70936	0.748527	0.753778	0.826041	0.819338	0.796516	0.856437	7.98344	8.03087	7.42457	4.55781	4.33676	4.81339	16.8427	18.9944	19.4509	10.3717	11.4211	9.89674	32.2633	30.9533	30.6496	0.804164	0.773066	0.819797	1.21855	1.26625	1.31707
28	8.38652	8.41331	7.955	4.86857	4.90136	5.0129	6.40458	6.8969	6.66815	5.56441	5.62612	6.4345	8.40598	8.88213	8.29204	0.771759	0.755133	0.83819	0.831293	0.808084	0.869602	8.38652	8.41331	7.955	4.94669	4.75093	5.265	18.6532	20.8365	21.41	10.967	11.8956	10.563	34.143	32.1706	32.8076	0.816482	0.801937	0.829381	1.28365	1.3217	1.38483
30	8.75984	8.70099	8.38091	5.11752	5.1136	5.3307	6.82536	7.27733	7.15923	5.91592	5.94526	6.76394	8.93133	9.41265	8.80672	0.777809	0.77718	0.842062	0.837416	0.834148	0.902346	8.75984	8.70099	8.38091	5.29056	5.03964	5.65337	20.2451	22.5663	23.1319	11.4743	12.258	11.1977	35.7027	33.2097	34.6336	0.842014	0.828437	0.863528	1.36071	1.38571	1.44553
32	9.11813	8.96146	8.79355	5.39934	5.35115	5.64945	7.22187	7.62848	7.58916	6.19694	6.1936	7.05415	9.45539	9.87053	9.32222	0.788579	0.793249	0.861132	0.858954	0.846346	0.894287	9.11813	8.96146	8.79355	5.62675	5.3996	5.99855	21.7645	24.0114	24.7611	11.8823	12.614	11.7109	37.0515	34.0529	36.262	0.874733	0.861181	0.892036	1.40766	1.44751	1.52251
34	9.40281	9.1836	9.10175	5.62242	5.52429	5.84497	7.58555	7.92168	7.99834	6.45732	6.41702	7.29984	9.9146	10.2766	9.72951	0.786086	0.797073	0.878266	0.885502	0.858857	0.917592	9.40281	9.1836	9.10175	5.89942	5.64224	6.31756	23.0205	25.3225	26.1198	12.2865	12.8686	12.1303	38.2905	34.7484	37.6865	0.898982	0.880832	0.914228	1.46692	1.50376	1.58848
36	9.68024	9.35866	9.41674	5.82176	5.65303	6.11948	7.87698	8.19318	8.35898	6.70862	6.65615	7.55625	10.2908	10.6956	10.1187	0.807165	0.801816	0.877032	0.888479	0.873136	0.924078	9.68024	9.35866	9.41674	6.16943	5.91128	6.58839	24.2557	26.4732	27.2949	12.6364	13.1427	12.5093	39.3226	35.3279	38.9523	0.914132	0.904476	0.95445	1.5237	1.55944	1.63529
38	9.88788	9.56117	9.69181	6.0175	5.79502	6.3073	8.17382	8.45448	8.68044	6.90319	6.77759	7.75815	10.6791	11.0012	10.4636	0.810287	0.810553	0.893561	0.912607	0.885188	0.938453	9.88788	9.56117	9.69181	6.40686	6.14936	6.87563	25.267	27.4888	28.4543	12.8871	13.4192	12.8707	40.2499	35.9234	39.9548	0.951425	0.939325	0.980224	1.58829	1.62111	1.68371
40	10.0314	9.69771	9.90574	6.13414	5.92945	6.50102	8.43183	8.66483	8.93167	7.08363	6.94682	7.96812	10.9691	11.3483	10.7681	0.817329	0.822508	0.901305	0.911566	0.905879	0.958951	10.0314	9.69771	9.90574	6.59645	6.3639	7.08951	26.2265	28.3211	29.4562	13.232	13.6035	13.1611	41.017	36.412	40.877	0.963767	0.95641	1.00479	1.63175	1.65975	1.7589
42	10.2665	9.82094	10.0899	6.27526	6.06926	6.61697	8.59702	8.83779	9.21334	7.21226	7.11098	8.05877	11.275	11.5488	11.0173	0.833301	0.822992	0.910719	0.920279	0.908541	0.980224	10.2665	9.82094	10.0899	6.78952	6.52719	7.30538	27.1182	29.1426	30.3726	13.466	13.747	13.4349	41.7352	36.846	41.7449	0.994817	0.99547	1.02925	1.68703	1.71333	1.79608
44	10.361	9.91915	10.2668	6.39672	6.13085	6.74325	8.82589	8.98699	9.43076	7.35974	7.23084	8.17029	11.4855	11.8052	11.2754	0.840562	0.842812	0.914422	0.941478	0.925409	0.974851	10.361	9.91915	10.2668	6.95844	6.68916	7.4783	27.7324	29.7865	31.0697	13.6598	13.9275	13.6957	42.2485	37.0885	42.4576	1.03271	1.0126	1.04777	1.7165	1.75641	1.84852
46	10.5469	9.99166	10.3783	6.50451	6.22126	6.90655	9.01412	9.12295	9.67083	7.47302	7.32181	8.29788	11.7096	12.0349	11.4776	0.838843	0.839957	0.931919	0.954256	0.938115	1.01222	10.5469	9.99166	10.3783	7.09873	6.83724	7.64211	28.4029	30.4516	31.9038	13.8209	14.036	13.8363	42.8752	37.4193	43.0148	1.04448	1.01744	1.08617	1.77493	1.81152	1.90241
48	10.6251	10.1051	10.536	6.59158	6.30367	7.00655	9.14112	9.26581	9.82264	7.5849	7.39219	8.46675	11.9189	12.2062	11.6842	0.854114	0.849734	0.922166	0.971899	0.945786	1.01638	10.6251	10.1051	10.536	7.29045	6.96108	7.80016	29.0536	30.9855	32.5032	13.9988	14.1832	14.0834	43.3757	37.7536	43.692	1.07279	1.05842	1.10314	1.81759	1.8362	1.9612
50	10.7427	10.1894	10.6587	6.6843	6.33968	7.07664	9.3506	9.41856	10.0154	7.70104	7.52166	8.52802	12.0855	12.3625	11.8415	0.860987	0.848669	0.942906	0.964445	0.955128	1.02318	10.7427	10.1894	10.6587	7.35988	7.0784	7.92952	29.6594	31.5268	33.099	14.1365	14.256	14.2845	43.8238	37.9704	44.0977	1.08576	1.07318	1.11933	1.85767	1.87877	1.98847
52	10.818	10.2874	10.7855	6.76469	6.40938	7.19207	9.4272	9.51923	10.11	7.77129	7.58652	8.6409	12.2621	12.5165	11.9871	0.867836	0.870667	0.949561	0.978409	0.968849	1.02333	10.818	10.2874	10.7855	7.4539	7.17283	8.06688	30.3048	31.9333	33.6794	14.2526	14.4163	14.4209	44.1148	38.2314	44.5289	1.10999	1.09675	1.15529	1.88492	1.92308	2.0277
54	10.8845	10.314	10.8413	6.83734	6.46867	7.22085	9.51241	9.62405	10.2445	7.8068	7.65039	8.72165	12.4293	12.6695	12.1199	0.870691	0.85847	0.958879	0.992687	0.979014	1.04566	10.8845	10.314	10.8413	7.55496	7.29899	8.18314	30.6648	32.335	34.2253	14.3613	14.4568	14.5199	44.5269	38.4219	44.9603	1.12707	1.13474	1.17412	1.92427	1.94561	2.06645
56	10.9305	10.35	10.9543	6.92662	6.52406	7.30369	9.61517	9.68745	10.3636	7.91555	7.6696	8.78801	12.5186	12.7975	12.2587	0.860285	0.870304	0.970011	1.01193	0.995543	1.06115	10.9305	10.35	10.9543	7.64547	7.37944	8.30238	31.172	32.7844	34.6295	14.4793	14.5131	14.6204	44.7279	38.6091	45.3937	1.16282	1.14222	1.21359	1.93746	1.99322	2.10751
58	11.0413	10.4151	11.0436	6.99249	6.56736	7.38135	9.73857	9.74781	10.4832	7.98786	7.74254	8.81647	12.6486	12.8871	12.3998	0.87512	0.886349	0.961033	1.01694	0.991017	1.05648	11.0413	10.4151	11.0436	7.72655	7.47091	8.41856	31.4894	33.0841	35.1235	14.5883	14.6284	14.8013	45.0299	38.7655	45.6567	1.17857	1.15333	1.2353	1.98707	2.01575	2.14815
60	11.025	10.468	11.1061	6.97901	6.62675	7.45034	9.8215	9.82295	10.5796	8.01896	7.82245	8.90834	12.7316	12.9759	12.4984	0.883566	0.881437	0.961517	1.01769	0.988016	1.07018	11.025	10.468	11.1061	7.79615	7.53485	8.48725	31.8682	33.3927	35.5033	14.6634	14.7276	14.8474	45.2675	38.9579	46.0749	1.19205	1.18605	1.24099	2.02172	2.05798	2.1686
62	11.1123	10.5132	11.1918	7.03734	6.64267	7.4972	9.85611	9.89415	10.6412	8.05894	7.81991	8.94052	12.8366	13.0676	12.5851	0.89073	0.873838	0.981313	1.03049	1.01127	1.08397	11.1123	10.5132	11.1918	7.89317	7.59564	8.55932	32.2623	33.5864	35.8929	14.7183	14.7635	14.9621	45.5565	39.0914	46.3765	1.20899	1.20604	1.26315	2.04145	2.07724	2.20059
64	11.1836	10.5711	11.2132	7.08293	6.68645	7.54473	9.98853	9.92619	10.7578	8.10057	7.90655	9.02973	12.9498	13.1055	12.6402	0.906266	0.887753	0.997987	1.04859	1.02035	1.09295	11.1836	10.5711	11.2132	7.92274	7.68272	8.67378	32.5732	33.9449	36.2189	14.8093	14.8064	15.0626	45.7708	39.3282	46.6313	1.23164	1.22114	1.29345	2.07218	2.10914	2.23558
66	11.2127	10.5789	11.2737	7.11543	6.70153	7.62519	10.0055	9.98391	10.8551	8.17111	7.90173	9.07895	12.9719	13.2207	12.7416	0.91343	0.906508	0.985064	1.04506	1.02514	1.0921	11.2127	10.5789	11.2737	7.99191	7.73342	8.72715	32.861	34.1292	36.3814	14.8465	14.8337	15.1503	45.8926	39.333	46.8519	1.24278	1.24106	1.32032	2.08658	2.13474	2.27273
68	11.2398	10.6348	11.3402	7.1382	6.72783	7.64359	10.0933	10.0817	10.8793	8.1729	7.94958	9.1069	13.0936	13.2719	12.7836	0.895086	0.904524	0.995978	1.05268	1.02127	1.09992	11.2398	10.6348	11.3402	8.05548	7.80128	8.78775	33.1401	34.3613	36.7405	14.8876	14.8442	15.167	45.9854	39.4051	46.9624	1.26705	1.26548	1.33268	2.13535	2.15217	2.30908
70	11.2579	10.6087	11.3662	7.15986	6.74279	7.66542	10.1299	10.0754	10.9387	8.2092	7.95861	9.12837	13.1485	13.3638	12.8984	0.908057	0.913623	1.00246	1.05965	1.03741	1.11105	11.2579	10.6087	11.3662	8.10686	7.84179	8.87513	33.3313	34.569	37.0842	14.9229	14.9062	15.2602	46.1502	39.551	47.1352	1.29449	1.28619	1.34248	2.1525	2.18111	2.3351
72	11.3107	10.6702	11.4644	7.22719	6.73567	7.72972	10.1698	10.1064	11.0204	8.23031	8.01877	9.18817	13.2047	13.3864	12.9525	0.913914	0.910671	0.998011	1.07531	1.05636	1.12925	11.3107	10.6702	11.4644	8.15937	7.87536	8.90727	33.6305	34.7454	37.3287	14.9986	14.9523	15.3287	46.394	39.6393	47.3502	1.31005	1.30577	1.37143	2.17862	2.21008	2.35693
74	11.3223	10.6362	11.4545	7.22128	6.78831	7.72809	10.2369	10.1284	11.1048	8.2759	8.01802	9.19006	13.2495	13.4553	12.9885	0.913841	0.919577	1.00331	1.077	1.05752	1.13058	11.3223	10.6362	11.4545	8.21637	7.9089	8.96211	33.9167	34.9042	37.5081	15.0146	15.0428	15.3752	46.5126	39.6561	47.5417	1.30957	1.31093	1.39882	2.20379	2.24519	2.38481
76	11.3679	10.6241	11.4995	7.23728	6.80402	7.7779	10.2757	10.1791	11.0961	8.3161	8.03791	9.22953	13.2985	13.4652	13.0098	0.914107	0.920787	1.02374	1.07555	1.06476	1.14063	11.3679	10.6241	11.4995	8.23495	7.96323	9.02138	34.0369	34.9979	37.7082	15.1478	15.0171	15.4827	46.5105	39.8606	47.7217	1.32559	1.33113	1.40662	2.2049	2.25785	2.41346
78	11.3866	10.6476	11.5242	7.27811	6.81341	7.81483	10.3027	10.1662	11.1791	8.31709	8.07574	9.26181	13.3499	13.5049	13.0797	0.93221	0.936372	1.02035	1.08315	1.07625	1.14384	11.3866	10.6476	11.5242	8.28972	8.01611	9.07319	34.2249	35.2257	37.8757	15.1237	15.008	15.5036	46.6618	39.829	47.8247	1.34028	1.33987	1.4193	2.24006	2.28282	2.44441
80	11.3913	10.6416	11.5261	7.29026	6.83538	7.84128	10.3119	10.2337	11.1911	8.33933	8.08982	9.28122	13.3406	13.5193	13.136	0.929136	0.923255	1.00943	1.08504	1.07071	1.15544	11.3913	10.6416	11.5261	8.3371	8.06473	9.11274	34.4104	35.3009	38.1474	15.1934	15.0623	15.5197	46.7123	39.867	47.9719	1.36167	1.35362	1.43796	2.24183	2.29858	2.45535
82	11.3814	10.6796	11.5484	7.289	6.83202	7.82219	10.3711	10.2172	11.2611	8.34783	8.09558	9.28224	13.4058	13.5641	13.146	0.940728	0.944939	1.03296	1.09489	1.08356	1.15294	11.3814	10.6796	11.5484	8.3545	8.08365	9.10339	34.6048	35.4033	38.237	15.2134	15.1143	15.5592	46.7876	39.9108	48.191	1.36789	1.36581	1.4669	2.28689	2.32184	2.47619
84	11.3641	10.7303	11.62	7.3244	6.8728	7.83656	10.3566	10.2488	11.2866	8.34175	8.13174	9.33882	13.4038	13.6162	13.2371	0.926087	0.943148	1.03509	1.10706	1.07928	1.15137	11.3641	10.7303	11.62	8.39666	8.11685	9.16445	34.7587	35.5273	38.4229	15.1989	15.0442	15.6184	46.9437	39.95	48.1754	1.37317	1.37755	1.48449	2.30855	2.34713	2.49001
86	11.4258	10.6714	11.5907	7.31601	6.83889	7.88404	10.387	10.3151	11.2883	8.36382	8.13774	9.35939	13.4247	13.5625	13.2457	0.937994	0.954111	1.0391	1.10849	1.08433	1.16843	11.4258	10.6714	11.5907	8.42505	8.13578	9.21005	34.9168	35.7097	38.436	15.236	15.1312	15.6865	46.8641	40.0605	48.2864	1.40773	1.41146	1.49178	2.32145	2.35555	2.52101
88	11.4303	10.7198	11.6251	7.34531	6.86345	7.89803	10.3587	10.2835	11.3298	8.38115	8.1337	9.39789	13.464	13.6959	13.2744	0.941527	0.946149	1.03886	1.12264	1.0944	1.16008	11.4303	10.7198	11.6251	8.42858	8.16141	9.23272	34.9723	35.7309	38.7422	15.1724	15.1182	15.6694	46.9951	40.1051	48.3859	1.41187	1.41252	1.49265	2.34899	2.38103	2.53337
90	11.4478	10.6969	11.6713	7.33783	6.87364	7.92516	10.4015	10.2843	11.3675	8.38996	8.13416	9.38887	13.469	13.6536	13.2884	0.948206	0.947141	1.0309	1.12744	1.09767	1.17775	11.4478	10.6969	11.6713	8.42234	8.19357	9.31152	35.1223	35.8284	38.8232	15.2872	15.1463	15.6938	47.0513	40.253	48.466	1.41862	1.4322	1.51987	2.34526	2.39015	2.58565
92	11.435	10.6947	11.693	7.32888	6.88477	7.92129	10.4459	10.3184	11.387	8.41525	8.17924	9.44247	13.4843	13.6799	13.3191	0.947141	0.945544	1.04218	1.12959	1.10897	1.18404	11.435	10.6947	11.693	8.48802	8.2313	9.34843	35.3168	35.8329	38.9278	15.2664	15.1967	15.7619	47.028	40.3145	48.5035	1.44207	1.42726	1.5351	2.38408	2.41692	2.58199
94	11.4536	10.6984	11.7039	7.36608	6.88277	7.93583	10.4558	10.3091	11.4062	8.37355	8.16092	9.45585	13.5083	13.7387	13.3877	0.961371	0.958322	1.03511	1.13433	1.09455	1.19457	11.4536	10.6984	11.7039	8.51813	8.22554	9.3501	35.3556	35.9415	39.0971	15.321	15.111	15.7301	47.1536	40.2941	48.6719	1.45388	1.45148	1.55489	2.39887	2.43797	2.59993
96	11.4866	10.6895	11.7311	7.34301	6.90953	7.94413	10.483	10.3823	11.4513	8.4243	8.15516	9.44116	13.5157	13.6833	13.3565	0.95157	0.95474	1.0507	1.13658	1.10897	1.19832	11.4866	10.6895	11.7311	8.5455	8.26203	9.36232	35.5222	36.0314	39.1248	15.3507	15.1591	15.7585	47.2739	40.2794	48.6844	1.4602	1.45913	1.56034	2.41811	2.4288	2.62071
98	11.4477	10.7139	11.7072	7.36303	6.90786	7.96458	10.474	10.314	11.4347	8.36769	8.16228	9.39659	13.5134	13.7078	13.3982	0.962509	0.952345	1.04341	1.15176	1.11904	1.19675	11.4477	10.7139	11.7072	8.54794	8.29178	9.38059	35.6144	36.0439	39.249	15.354	15.1643	15.8462	47.2075	40.2229	48.6911	1.46162	1.47263	1.56344	2.42505	2.45864	2.6416
100	11.4561	10.6924	11.7137	7.37205	6.89612	8.01008	10.4624	10.3597	11.4489	8.37304	8.17508	9.44775	13.5281	13.72	13.4265	0.963574	0.96384	1.05007	1.13767	1.1118	1.21504	11.4561	10.6924	11.7137	8.55634	8.27106	9.4211	35.6965	36.0664	39.3571	15.3536	15.1737	15.8081	47.2163	40.2374	48.7768	1.48549	1.48636	1.56406	2.429	2.45419	2.63533
102	11.4832	10.6931	11.7244	7.39037	6.90675	7.98789	10.4959	10.4052	11.4718	8.41593	8.15981	9.46103	13.508	13.7027	13.423	0.953579	0.974658	1.05699	1.1451	1.1135	1.19997	11.4832	10.6931	11.7244	8.54322	8.3275	9.39409	35.6972	36.2309	39.4896	15.3718	15.1773	15.8389	47.2285	40.2834	48.9007	1.49691	1.49478	1.58134	2.43246	2.48117	2.65973
104	11.4682	10.725	11.7103	7.35722	6.88978	8.00115	10.4879	10.3138	11.4417	8.42004	8.20032	9.47904	13.5227	13.7065	13.4343	0.966115	0.968293	1.05883	1.15747	1.12158	1.21787	11.4682	10.725	11.7103	8.58378	8.3395	9.44203	35.8118	36.2471	39.5097	15.3451	15.1978	15.813	47.2206	40.2297	48.9403	1.5101	1.51077	1.60375	2.46568	2.50997	2.70936
106	11.4243	10.674	11.728	7.35344	6.89479	8.04612	10.5132	10.3464	11.5049	8.42188	8.17711	9.46173	13.5935	13.7107	13.4146	0.973399	0.978336	1.06909	1.1626	1.1301	1.21272	11.4243	10.674	11.728	8.62911	8.33379	9.5014	36.0117	36.3272	39.5995	15.3415	15.1913	15.8808	47.2627	40.2514	49.0542	1.5129	1.54103	1.63161	2.47232	2.51106	2.6947
108	11.4458	10.6653	11.7561	7.40514	6.90469	8.01054	10.4818	10.3977	11.4919	8.46341	8.16327	9.51391	13.5507	13.6986	13.4392	0.969116	0.965679	1.07359	1.15292	1.13491	1.21453	11.4458	10.6653	11.7561	8.59988	8.38623	9.51517	35.9885	36.3949	39.7259	15.3449	15.1894	15.8736	47.3297	40.302	49.06	1.53195	1.52075	1.6325	2.49729	2.52856	2.73034
110	11.4519	10.709	11.7323	7.39967	6.91048	7.99554	10.51	10.39	11.547	8.38132	8.17956	9.46048	13.5721	13.7088	13.4642	0.971027	0.975722	1.07618	1.16928	1.12671	1.21725	11.4519	10.709	11.7323	8.6377	8.35722	9.51202	36.0534	36.3968	39.7431	15.3467	15.1527	15.8928	47.2882	40.2471	49.1012	1.53563	1.52801	1.64289	2.50346	2.52072	2.73407
112	11.4674	10.6718	11.7735	7.3549	6.91277	8.03341	10.5663	10.3362	11.5389	8.42101	8.20703	9.48022	13.5375	13.7306	13.4667	0.973641	0.986008	1.05963	1.15202	1.13883	1.23324	11.4674	10.6718	11.7735	8.65254	8.34286	9.53083	36.1484	36.5098	39.8399	15.3824	15.1657	15.8831	47.2917	40.3068	49.1961	1.55634	1.55424	1.65569	2.50656	2.5438	2.73134
114	11.456	10.673	11.7519	7.3784	6.90355	8.05013	10.5135	10.36	11.5296	8.39664	8.17043	9.47836	13.5574	13.7254	13.4878	0.976787	0.986419	1.05377	1.16028	1.14987	1.22363	11.456	10.673	11.7519	8.66706	8.37321	9.53879	36.3521	36.5194	39.8593	15.3939	15.1539	15.896	47.3051	40.3012	49.1646	1.55801	1.53645	1.66469	2.53565	2.56079	2.76664
116	11.4467	10.6457	11.7928	7.3903	6.87945	8.03898	10.5025	10.3786	11.555	8.41515	8.16484	9.5098	13.5659	13.7393	13.442	0.975892	0.97911	1.08005	1.17153	1.15016	1.24624	11.4467	10.6457	11.7928	8.65186	8.3993	9.56885	36.3625	36.5355	39.823	15.3804	15.1258	15.9201	47.3258	40.3002	49.1598	1.57326	1.56765	1.66977	2.55048	2.55782	2.79184
118	11.4504	10.6937	11.7461	7.3782	6.9121	8.01098	10.5274	10.3347	11.5806	8.43086	8.13767	9.49186	13.5558	13.7133	13.5047	0.960113	0.981748	1.07819	1.16572	1.14948	1.23675	11.4504	10.6937	11.7461	8.6341	8.41612	9.54658	36.4601	36.546	39.9541	15.4406	15.1317	15.9755	47.356	40.3836	49.2003	1.55881	1.58297	1.69078	2.57761	2.57057	2.77545
120	11.4211	10.6375	11.7602	7.38212	6.91043	8.05943	10.536	10.3301	11.5506	8.37764	8.14982	9.47785	13.5792	13.7237	13.5089	0.980756	0.986637	1.0651	1.17235	1.13883	1.24522	11.4211	10.6375	11.7602	8.68012	8.41401	9.56159	36.4339	36.5364	40.1397	15.3897	15.121	15.9356	47.273	40.2986	49.1843	1.59318	1.57193	1.68144	2.5682	2.5963	2.79198
122	11.4006	10.7002	11.7485	7.38401	6.88814	8.02915	10.5417	10.3286	11.5415	8.39545	8.17302	9.47575	13.5308	13.7069	13.5221	0.975238	0.982353	1.07557	1.18702	1.15747	1.22862	11.4006	10.7002	11.7485	8.67115	8.42164	9.5854	36.4848	36.5589	40.0496	15.4117	15.2032	15.9848	47.3279	40.3078	49.2441	1.58313	1.59429	1.69731	2.56803	2.60861	2.82923
124	11.4512	10.6746	11.7559	7.42648	6.92575	8.03917	10.5227	10.3385	11.5608	8.40508	8.15057	9.51853	13.5433	13.7015	13.4749	0.982257	0.993655	1.07562	1.1869	1.16761	1.23871	11.4512	10.6746	11.7559	8.69382	8.42955	9.57027	36.4786	36.5677	40.1123	15.4174	15.0997	15.9916	47.2621	40.2933	49.325	1.59424	1.58737	1.71062	2.59068	2.63935	2.81766
126	11.4311	10.6244	11.7379	7.34972	6.8923	8.05229	10.5123	10.3368	11.5987	8.39429	8.1512	9.4485	13.5303	13.7359	13.4745	0.972552	0.99455	1.0869	1.18615	1.15328	1.24471	11.4311	10.6244	11.7379	8.6641	8.40177	9.589	36.6244	36.6627	40.1048	15.3916	15.1228	15.975	47.3275	40.2992	49.3086	1.61116	1.59741	1.71718	2.60837	2.62238	2.83172
128	11.4154	10.6561	11.744	7.36003	6.9438	8.0466	10.4911	10.3708	11.6038	8.43081	8.15964	9.50496	13.4924	13.6806	13.4893	0.979062	0.988331	1.09196	1.18513	1.16417	1.26603	11.4154	10.6561	11.744	8.72664	8.44681	9.66976	36.5952	36.6167	40.1623	15.3972	15.1065	15.937	47.2561	40.3374	49.3458	1.61319	1.6251	1.7333	2.6015	2.6157	2.86294
130	11.4315	10.6433	11.724	7.38929	6.8869	8.06245	10.5372	10.345	11.5621	8.40397	8.18977	9.49179	13.53	13.6942	13.503	0.983273	0.999802	1.09022	1.18888	1.16267	1.26001	11.4315	10.6433	11.724	8.70413	8.45562	9.63332	36.6795	36.6362	40.1973	15.346	15.0465	15.943	47.2822	40.2739	49.2835	1.62411	1.62432	1.73998	2.61602	2.63441	2.84438
132	11.4093	10.6159	11.763	7.38454	6.87478	8.08418	10.5393	10.3213	11.5959	8.40627	8.16593	9.47502	13.5329	13.7356	13.4424	0.988113	0.997116	1.06962	1.19946	1.18365	1.26066	11.4093	10.6159	11.763	8.70883	8.46372	9.64145	36.714	36.7035	40.2524	15.3995	15.1224	15.9312	47.2527	40.2264	49.3785	1.61101	1.63369	1.75121	2.6355	2.67214	2.85161
134	11.4433	10.6023	11.7318	7.37143	6.84293	8.04597	10.4991	10.3408	11.554	8.40588	8.15865	9.4788	13.5549	13.6953	13.484	0.993849	0.999463	1.0916	1.20667	1.16161	1.26461	11.4433	10.6023	11.7318	8.70191	8.43575	9.6337	36.756	36.6898	40.2092	15.3987	15.1369	15.8861	47.2712	40.0805	49.3274	1.62297	1.63957	1.74494	2.64029	2.65711	2.86567
136	11.4234	10.5817	11.7377	7.37704	6.86326	8.0906	10.4761	10.363	11.5648	8.3948	8.15395	9.49673	13.5458	13.6864	13.496	0.994793	0.989977	1.09305	1.20498	1.17131	1.27199	11.4234	10.5817	11.7377	8.73678	8.46788	9.62489	36.764	36.6436	40.2642	15.4661	15.1141	15.9671	47.2127	40.2085	49.3248	1.64552	1.64339	1.76626	2.65784	2.68371	2.87136
138	11.4296	10.6052	11.6783	7.39582	6.84373	8.04532	10.4887	10.3448	11.5423	8.38294	8.16443	9.49259	13.5332	13.6965	13.5113	1.00193	0.999052	1.09372	1.18893	1.17151	1.27182	11.4296	10.6052	11.6783	8.68705	8.47168	9.66117	36.777	36.7412	40.2366	15.4364	15.0603	15.9939	47.182	40.188	49.2372	1.64695	1.66302	1.76314	2.66369	2.66457	2.87402
140	11.3976	10.6601	11.6864	7.35502	6.84584	8.06594	10.5228	10.325	11.609	8.41588	8.11129	9.54387	13.538	13.6498	13.4984	0.998374	0.997043	1.08811	1.1966	1.17552	1.26168	11.3976	10.6601	11.6864	8.71272	8.4477	9.70103	36.8716	36.6527	40.338	15.3678	15.042	15.9621	47.2207	40.2559	49.3333	1.65704	1.65128	1.76084	2.68383	2.68569	2.90945
142	11.4232	10.6155	11.6837	7.38907	6.84867	8.045	10.5265	10.2847	11.5764	8.41036	8.12678	9.48296	13.5589	13.6971	13.5188	0.990969	1.00822	1.10273	1.20268	1.17402	1.27748	11.4232	10.6155	11.6837	8.74288	8.48521	9.69682	37.0178	36.6701	40.3254	15.4326	15.026	15.986	47.1614	40.2272	49.2976	1.66609	1.66004	1.78768	2.67834	2.69269	2.92448
144	11.3478	10.591	11.7227	7.38527	6.84915	8.01971	10.5374	10.3292	11.5691	8.40874	8.1676	9.4695	13.4865	13.6411	13.4565	0.996704	1.01781	1.0824	1.20408	1.17194	1.28392	11.3478	10.591	11.7227	8.72862	8.42111	9.67468	37.0355	36.8122	40.2744	15.346	15.0335	15.9502	47.1975	40.1779	49.3529	1.66733	1.66614	1.77376	2.68267	2.69518	2.9058
146	11.3779	10.5819	11.725	7.40035	6.8332	8.06146	10.4966	10.2755	11.5452	8.35252	8.12148	9.52887	13.5086	13.6715	13.4757	1.00026	1.00438	1.10019	1.21013	1.17741	1.25597	11.3779	10.5819	11.725	8.74617	8.44453	9.66964	37.0249	36.753	40.3464	15.4132	15.0382	15.9128	47.0806	40.1277	49.3176	1.67043	1.67132	1.79731	2.69562	2.7219	2.93561
148	11.3458	10.5546	11.7177	7.37239	6.84567	8.04687	10.4645	10.2783	11.5621	8.35528	8.13675	9.48872	13.5206	13.6493	13.5064	0.996825	1.01628	1.09498	1.20902	1.18883	1.27012	11.3458	10.5546	11.7177	8.73351	8.45494	9.67758	36.964	36.682	40.3155	15.3712	15.0669	16.0116	47.1517	40.1129	49.4589	1.68439	1.66672	1.80142	2.69496	2.70808	2.91773
150	11.355	10.5829	11.6616	7.42147	6.8127	8.05108	10.466	10.255	11.5362	8.39652	8.09336	9.52069	13.4433	13.6105	13.4478	0.988863	1.00595	1.105	1.21749	1.19445	1.28401	11.355	10.5829	11.6616	8.74411	8.45116	9.70316	37.0063	36.7218	40.3589	15.357	14.9926	15.9789	47.0529	40.1362	49.2728	1.66762	1.66905	1.82006	2.69644	2.74656	2.95224
152	11.3759	10.5523	11.6761	7.37331	6.79402	8.05071	10.4318	10.24	11.5671	8.3538	8.11117	9.49165	13.4552	13.6151	13.495	1.00164	1.00801	1.09668	1.21635	1.19488	1.28605	11.3759	10.5523	11.6761	8.76013	8.47135	9.7073	37.0622	36.6655	40.3809	15.3851	14.9825	16.0236	46.9913	40.1474	49.3377	1.68316	1.6886	1.81793	2.71439	2.73693	2.91804
154	11.359	10.5354	11.6602	7.35524	6.7947	8.06957	10.4685	10.2343	11.5967	8.34894	8.11896	9.48579	13.4443	13.614	13.4571	1.00164	1.02526	1.08891	1.21335	1.20614	1.28438	11.359	10.5354	11.6602	8.73746	8.46704	9.69636	37.0448	36.7151	40.4038	15.4043	15.0475	15.988	47.0358	40.1623	49.3703	1.68129	1.70109	1.82149	2.70692	2.72889	2.95875
156	11.3287	10.5488	11.6461	7.36748	6.79637	8.09316	10.5096	10.2284	11.536	8.34577	8.09977	9.46878	13.4474	13.5793	13.4317	0.994889	1.01999	1.09702	1.21923	1.20173	1.28324	11.3287	10.5488	11.6461	8.76081	8.4818	9.72463	37.1348	36.5539	40.3874	15.3725	14.9979	15.9324	46.9325	40.107	49.3417	1.69204	1.70336	1.82722	2.72783	2.74571	2.96526
158	11.3203	10.5409	11.6691	7.34783	6.82079	8.01792	10.435	10.2232	11.5319	8.35668	8.09369	9.47112	13.365	13.5627	13.4615	1.00203	1.00041	1.09481	1.21412	1.19169	1.28348	11.3203	10.5409	11.6691	8.75805	8.49276	9.74166	37.02	36.7187	40.434	15.3211	14.9903	16.0251	47.0873	40.0507	49.3406	1.6969	1.70332	1.82974	2.72003	2.74269	2.97828
160	11.3353	10.4867	11.6215	7.33103	6.81844	8.017	10.466	10.2132	11.5534	8.37374	8.12847	9.4892	13.4431	13.5603	13.4578	0.997818	1.02337	1.10174	1.21286	1.18678	1.30471	11.3353	10.4867	11.6215	8.7232	8.48432	9.7344	37.1432	36.6325	40.4262	15.3491	14.9949	16.0004	46.9542	40.0181	49.2848	1.70414	1.71953	1.83422	2.72715	2.76096	2.97915
162	11.2914	10.5122	11.6723	7.35911	6.79593	8.04079	10.4489	10.2095	11.5667	8.35397	8.0466	9.46048	13.4701	13.5028	13.4375	1.00387	1.00822	1.09121	1.21848	1.19902	1.29004	11.2914	10.5122	11.6723	8.77303	8.48884	9.71538	37.0525	36.5863	40.4223	15.337	15.0051	15.9795	46.9596	40.1636	49.272	1.69884	1.71602	1.8332	2.7445	2.76108	2.99815
164	11.2504	10.5384	11.6412	7.34258	6.79124	8.04014	10.4589	10.1963	11.5637	8.2941	8.07141	9.46977	13.4108	13.5673	13.4492	1.0157	1.01101	1.10863	1.21775	1.20643	1.30838	11.2504	10.5384	11.6412	8.76792	8.48066	9.7406	37.115	36.5554	40.4947	15.3011	14.9581	15.9516	46.9717	39.9908	49.3302	1.70186	1.72285	1.84583	2.75287	2.76287	2.9876
166	11.2528	10.5207	11.6088	7.31308	6.77594	8.01964	10.4471	10.1571	11.5187	8.27372	8.05442	9.46123	13.3969	13.5254	13.4127	1.00646	1.02253	1.10592	1.21584	1.21129	1.29938	11.2528	10.5207	11.6088	8.76042	8.48098	9.73278	37.2984	36.5764	40.3762	15.3283	14.9022	15.9773	46.9597	39.9665	49.239	1.73001	1.72401	1.86551	2.74961	2.76236	2.98355
168	11.2441	10.483	11.6395	7.34362	6.75465	8.04568	10.4239	10.1788	11.5275	8.29976	8.06879	9.43434	13.3729	13.5494	13.4155	1.01149	1.01655	1.09559	1.21838	1.20229	1.31482	11.2441	10.483	11.6395	8.76134	8.47168	9.73999	37.1928	36.6977	40.4555	15.3196	14.958	16.0113	46.9426	40.0535	49.3408	1.7205	1.74097	1.84402	2.74782	2.78743	3.01136
170	11.2566	10.5235	11.5736	7.34253	6.79255	8.01458	10.456	10.1663	11.5266	8.30393	8.05909	9.45985	13.3905	13.5077	13.4192	1.01471	1.02454	1.09399	1.23227	1.20502	1.28878	11.2566	10.5235	11.5736	8.75529	8.49758	9.76008	37.1224	36.6138	40.4293	15.2957	14.9198	15.9601	46.9376	40.0094	49.2725	1.71992	1.72696	1.86246	2.75796	2.77282	2.99418
172	11.2324	10.4984	11.6157	7.29345	6.75341	8.02521	10.4445	10.1663	11.5058	8.30823	8.02811	9.42763	13.3321	13.5166	13.396	1.00229	1.02333	1.09017	1.22238	1.21616	1.3012	11.2324	10.4984	11.6157	8.72398	8.48045	9.77274	37.224	36.5175	40.4762	15.2711	14.9384	15.9624	46.8799	39.9126	49.2382	1.73061	1.73553	1.86415	2.7687	2.77952	3.03336
174	11.208	10.5142	11.5894	7.29466	6.71622	8.02562	10.4177	10.1743	11.5389	8.30787	8.03433	9.43112	13.3732	13.5246	13.4193	1.01364	1.02347	1.10115	1.22039	1.21376	1.3049	11.208	10.5142	11.5894	8.7407	8.46687	9.77939	37.2187	36.5861	40.4179	15.2958	14.8694	15.9324	46.8722	39.8684	49.2168	1.73025	1.75252	1.86848	2.78634	2.79702	3.01414
176	11.1948	10.4567	11.5482	7.31	6.78272	8.03411	10.3867	10.1697	11.4939	8.30978	8.07317	9.45077	13.3165	13.489	13.3932	1.01534	1.02383	1.10643	1.2359	1.20553	1.29268	11.1948	10.4567	11.5482	8.75258	8.45615	9.71052	37.2585	36.5832	40.4616	15.3008	14.9133	15.9145	46.7917	39.844	49.23	1.72899	1.74332	1.8741	2.77475	2.81226	3.03789
178	11.216	10.4671	11.6026	7.31187	6.71392	8.01521	10.3856	10.113	11.5167	8.25286	8.03673	9.41684	13.39	13.5081	13.3329	1.01483	1.0179	1.11391	1.23484	1.19527	1.29962	11.216	10.4671	11.6026	8.74653	8.49293	9.76942	37.2193	36.5789	40.4199	15.2925	14.9309	15.9214	46.8902	39.8749	49.1878	1.74734	1.75005	1.88148	2.78913	2.81616	3.05575
180	11.2354	10.4422	11.5481	7.2843	6.70128	7.99866	10.374	10.1395	11.4736	8.27259	8.03508	9.41447	13.34	13.4778	13.3783	1.02662	1.02485	1.10222	1.22724	1.20776	1.31199	11.2354	10.4422	11.5481	8.75945	8.48441	9.75115	37.287	36.5073	40.3782	15.2797	14.9061	15.8917	46.8891	39.8829	49.2345	1.7493	1.74864	1.88564	2.79317	2.80745	3.0381
182	11.2376	10.4408	11.5485	7.23871	6.71247	7.9897	10.419	10.1653	11.4769	8.25923	8.00868	9.42478	13.3812	13.4915	13.3419	1.02582	1.0174	1.10181	1.23426	1.21579	1.30541	11.2376	10.4408	11.5485	8.74561	8.47033	9.74781	37.1732	36.5744	40.3097	15.284	14.9049	15.9642	46.8004	39.7859	49.1948	1.75043	1.76123	1.87732	2.80111	2.81188	3.05432
184	11.1688	10.4571	11.5804	7.28196	6.72662	8.00839	10.3795	10.097	11.5012	8.26099	8.02356	9.39864	13.2921	13.4711	13.3369	1.01565	1.02579	1.09932	1.23285	1.21146	1.3201	11.1688	10.4571	11.5804	8.70275	8.48134	9.73581	37.309	36.4987	40.3848	15.272	14.8908	15.9248	46.9274	39.7578	49.1477	1.75467	1.76164	1.89646	2.80747	2.82463	3.07438
186	11.1783	10.4593	11.5722	7.29788	6.7288	8.00176	10.3935	10.1044	11.5177	8.2387	8.00275	9.4044	13.2888	13.4594	13.3488	1.03651	1.02579	1.10863	1.24217	1.21136	1.30217	11.1783	10.4593	11.5722	8.69733	8.43763	9.75016	37.3058	36.5249	40.4544	15.2131	14.8571	15.9191	46.8122	39.8723	49.1571	1.75549	1.77159	1.90176	2.80793	2.82983	3.07402
188	11.1866	10.4162	11.5531	7.26335	6.72868	7.9945	10.3432	10.0901	11.5001	8.26431	7.99914	9.41505	13.3216	13.4601	13.3475	1.0204	1.02916	1.11212	1.24737	1.21485	1.30923	11.1866	10.4162	11.5531	8.71783	8.4516	9.72414	37.3363	36.5913	40.4008	15.2184	14.8295	15.8982	46.7817	39.8123	49.2093	1.75905	1.76863	1.88472	2.80541	2.82097	3.04401
190	11.1511	10.4116	11.5366	7.24551	6.67771	7.97095	10.3718	10.0896	11.4962	8.24548	8.03404	9.39383	13.2866	13.4503	13.3772	1.02468	1.03661	1.10599	1.22175	1.20788	1.3055	11.1511	10.4116	11.5366	8.69244	8.50114	9.73203	37.2515	36.5496	40.3321	15.2287	14.8559	15.9212	46.73	39.732	49.1597	1.77967	1.77173	1.90921	2.82492	2.83709	3.07138
192	11.1333	10.425	11.5345	7.25197	6.67374	7.97613	10.357	10.0621	11.4829	8.20635	7.97644	9.39509	13.2813	13.4451	13.3116	1.0151	1.03005	1.10447	1.25282	1.21606	1.30918	11.1333	10.425	11.5345	8.7301	8.46365	9.68871	37.3657	36.4434	40.3824	15.191	14.862	15.8813	46.7709	39.7257	49.1897	1.76312	1.77224	1.91205	2.84135	2.85031	3.08813
194	11.1461	10.3915	11.4939	7.23747	6.70099	7.9512	10.3572	10.0651	11.4521	8.19783	7.97056	9.38095	13.2997	13.3953	13.2832	1.0181	1.0234	1.10684	1.24735	1.21352	1.31141	11.1461	10.3915	11.4939	8.71831	8.45068	9.73752	37.2956	36.4638	40.3293	15.1334	14.857	15.8898	46.6986	39.7862	49.1502	1.78531	1.78978	1.89375	2.82458	2.84612	3.08689
196	11.1136	10.4015	11.4925	7.20962	6.69531	7.96028	10.3508	10.0576	11.4648	8.25376	7.96921	9.37812	13.2252	13.4457	13.3464	1.01761	1.04421	1.10607	1.23859	1.22545	1.31264	11.1136	10.4015	11.4925	8.70875	8.49271	9.77864	37.3912	36.4598	40.3137	15.1603	14.8009	15.8928	46.7579	39.7197	49.0948	1.75685	1.78514	1.92115	2.84234	2.84481	3.08946
198	11.0818	10.3439	11.5081	7.20587	6.66648	7.95943	10.3581	10.0598	11.4135	8.23181	7.95611	9.37524	13.2549	13.3754	13.3279	1.01708	1.02611	1.11911	1.23186	1.21226	1.3209	11.0818	10.3439	11.5081	8.6862	8.44463	9.74273	37.3257	36.3834	40.3198	15.1654	14.8563	15.9038	46.6042	39.6986	49.1607	1.78209	1.79099	1.90091	2.85183	2.86091	3.07574
200	11.1051	10.3836	11.4791	7.20993	6.67234	7.95234	10.3677	10.0354	11.4495	8.19618	7.96652	9.37851	13.2462	13.3568	13.3273	1.01447	1.04138	1.10781	1.23058	1.21589	1.31245	11.1051	10.3836	11.4791	8.67591	8.46781	9.76078	37.3628	36.3976	40.23	15.1728	14.8156	15.8887	46.6112	39.6498	49.1906	1.77693	1.78422	1.91238	2.84063	2.86274	3.09115
	-0.10427			-0.00565			-0.43316			-0.39953
	-0.10151			-0.00511			-0.43546			-0.39414
	-0.10277			-0.00881			-0.42823			-0.40093
	-0.10475			-0.00196			-0.4308			-0.40457
	-0.10713			-0.00192			-0.43065			-0.39598
	-0.10759			-0.00616			-0.42848			-0.40154
	-0.10675			-0.0012			-0.43005			-0.39989
	-0.10443			-0.0066			-0.42774			-0.39817
	-0.10259			-0.0072			-0.42694			-0.39687
	-0.09909			-0.00322			-0.43206			-0.40315
	-0.10121			0.002974			-0.43409			-0.39322
	-0.10319			0.003416			-0.43196			-0.40245
	-0.09967			-0.00049			-0.43249			-0.39419
	-0.10538			-0.00333			-0.43257			-0.39864
	-0.10141			-0.00242			-0.43574			-0.39355
	-0.10049			-0.00269			-0.43045			-0.39611
	-0.09716			-0.00651			-0.43151			-0.39564
	-0.104			0.000283			-0.43447			-0.40204
	-0.09939			-0.00447			-0.43446			-0.39282
	-0.10698			-0.00084			-0.43015			-0.40043
	-0.10619			0.001586			-0.43185			-0.39819
	-0.10123			-0.00293			-0.43209			-0.39799
	-0.10273			0.006938			-0.42906			-0.40478
	-0.10905			-0.00093			-0.43264			-0.39429
	-0.10184			-0.00339			-0.42905			-0.3994
	-0.09941			-0.00819			-0.4293			-0.40231
	-0.10163			-0.00566			-0.43285			-0.39144
	-0.10331			-0.0028			-0.43292			-0.39264
	-0.10782			-0.00665			-0.43722			-0.40294
	-0.10684			-0.00858			-0.43152			-0.39833
	-0.10784			-0.00135			-0.43253			-0.39424
	-0.09952			-0.00423			-0.42909			-0.40565
	-0.10182			-0.00475			-0.43174			-0.40082
	-0.10279			-0.00273			-0.42951			-0.39521
	-0.10053			0.001373			-0.43482			-0.40073
	-0.10428			-0.00343			-0.43228			-0.39526
	-0.0991			-0.00032			-0.43208			-0.39553
	-0.10707			0.002761			-0.43704			-0.40359
	-0.10833			-0.00186			-0.43363			-0.40149
	-0.10864			-0.0037			-0.4314			-0.39444
	-0.10378			-0.00279			-0.4287			-0.39814
	-0.10418			-0.00418			-0.42672			-0.39749
	-0.10001			-0.00423			-0.43194			-0.3986
	-0.10395			-0.00399			-0.42803			-0.39729
	-0.10657			-0.00512			-0.43467			-0.40069
	-0.1068			0.001124			-0.42842			-0.39644
	-0.10599			-0.00076			-0.43015			-0.39352
	-0.1036			0.000746			-0.42781			-0.39891
	-0.10572			-0.00144			-0.43031			-0.40069
	-0.10649			-0.00748			-0.43312			-0.39892
	-0.09797			-0.00481			-0.43394			-0.39573
	-0.10091			-0.00201			-0.42853			-0.40118
	-0.10796			-0.00562			-0.4362			-0.39833
	-0.10253			-0.0077			-0.43679			-0.39712
	-0.10277			-0.00747			-0.42731			-0.40034
	-0.09977			-0.00905			-0.42745			-0.4024
	-0.10561			-0.00274			-0.42962			-0.39849
	-0.10561			-0.00028			-0.43347			-0.40221
	-0.10928			-0.00043			-0.43134			-0.40074
	-0.09958			-0.00572			-0.43104			-0.40178
	-0.1014			-0.00451			-0.43111			-0.39473
	-0.10583			0.001236			-0.43439			-0.39918
	-0.10263			-0.00194			-0.43455			-0.39358
	-0.10555			-0.00097			-0.42987			-0.39637
	-0.10896			-0.00163			-0.42941			-0.40279
	-0.10553			-0.00469			-0.43109			-0.40593
	-0.10086			-0.00647			-0.42964			-0.39392
	-0.10592			0.001978			-0.43656			-0.39792
	-0.10941			-0.0067			-0.43167			-0.40224
	-0.10302			-0.0077			-0.43458			-0.39517
	-0.10308			-0.00624			-0.43301			-0.40125
	-0.10966			-0.00576			-0.43576			-0.39513
	-0.105			-0.00773			-0.43527			-0.39756
	-0.10653			-0.00401			-0.42979			-0.39735
	-0.10187			-0.00048			-0.42909			-0.40288
	-0.10163			-0.00265			-0.43159			-0.39503
	-0.10389			-0.00458			-0.42897			-0.39634
	-0.1047			-0.00524			-0.42852			-0.40199
	-0.09961			-0.00416			-0.43635			-0.39788
	-0.10144			-0.00353			-0.43673			-0.39647
	-0.10284			-0.00569			-0.43383			-0.39326
	-0.10244			-0.00138			-0.43551			-0.40299
	-0.09881			-0.00454			-0.43			-0.39681
	-0.11044			-0.00235			-0.43036			-0.3956
	-0.10349			-0.00426			-0.43012			-0.39691
	-0.09874			-0.00102			-0.42802			-0.40353
	-0.10317			-0.00277			-0.43385			-0.39774
	-0.10147			0.000562			-0.43071			-0.40101
	-0.10055			-0.00247			-0.43814			-0.39626
	-0.10635			-0.00151			-0.43437			-0.39778
	-0.10356			-0.00225			-0.4276			-0.40462
	-0.11136			-0.00759			-0.43106			-0.40251
	-0.10992			-0.00213			-0.4312			-0.40096
	-0.1041			-0.00185			-0.4353			-0.39823
	-0.10089			-0.00582			-0.42993			-0.40128
	-0.10368			-0.00544			-0.42984			-0.39968
	-0.10059			-0.00233			-0.43583			-0.39821
	-0.10585			-0.00509			-0.43302			-0.3959
	-0.10776			-0.0005			-0.4338			-0.4024
	-0.09811			-0.00305			-0.43573			-0.39798
	-0.10414			-0.00491			-0.43087			-0.40128
	-0.1012			-0.00806			-0.42985			-0.40143
	-0.10663			-0.00643			-0.43092			-0.40061
	-0.10283			-0.00788			-0.43167			-0.40254
	-0.10552			-0.00307			-0.43861			-0.40191
	-0.10723			-0.00808			-0.43103			-0.40161
	-0.10659			0.000428			-0.43283			-0.39751
	-0.10368			-0.00748			-0.43708			-0.39908
	-0.10238			-0.0085			-0.42962			-0.40104
	-0.10518			-0.00866			-0.43492			-0.3933
	-0.10808			0.000666			-0.43808			-0.40058
	-0.10749			-0.00188			-0.43419			-0.40369
	-0.10575			-0.00868			-0.43644			-0.40148
	-0.10539			-0.00385			-0.43242			-0.40228
	-0.10954			-0.00093			-0.4327			-0.40135
	-0.10557			-0.00042			-0.43494			-0.39952
	-0.1063			-0.00528			-0.43133			-0.40681
	-0.10598			0.000169			-0.43482			-0.40052
	-0.10976			-0.00392			-0.43494			-0.4018
	-0.10783			-0.00462			-0.43058			-0.40148
	-0.10291			-0.00413			-0.43465			-0.39855
	-0.09903			-0.00437			-0.43231			-0.39693
	-0.10039			-0.00201			-0.43534			-0.39983
	-0.10683			0.000312			-0.4348			-0.39832
	-0.10097			-0.00218			-0.43162			-0.39862
	-0.10665			-0.00562			-0.43734			-0.39753
	-0.09908			-0.00722			-0.42908			-0.39737
	-0.10482			-0.00651			-0.43238			-0.39877
	-0.10372			-0.00789			-0.43193			-0.39992
	-0.10527			-0.00192			-0.43975			-0.39675
	-0.10315			-0.00134			-0.43494			-0.4025
	-0.10518			-0.00219			-0.43058			-0.39739
	-0.10482			-0.00623			-0.43866			-0.39517
	-0.10124			-0.00471			-0.43211			-0.40392
	-0.09859			-0.00127			-0.43297			-0.40555
	-0.10806			-0.00093			-0.43633			-0.39772
	-0.10343			-0.00365			-0.43461			-0.40246
	-0.10785			-0.01059			-0.4339			-0.40035
	-0.10994			-0.00293			-0.43497			-0.39644
	-0.10419			-0.00877			-0.43293			-0.40451
	-0.10232			-0.00187			-0.42842			-0.4026
	-0.10414			-0.00777			-0.43651			-0.40175
	-0.10491			-0.00667			-0.43746			-0.40354
	-0.10391			-0.00589			-0.43005			-0.40128
	-0.11009			-0.00358			-0.4349			-0.39855
	-0.10021			-0.01086			-0.43261			-0.40138
	-0.10658			-0.00543			-0.4351			-0.39959
	-0.10045			-0.00566			-0.43247			-0.40024
	-0.10529			-0.00588			-0.43416			-0.40243
	-0.10364			-0.00343			-0.44098			-0.39942
	-0.10661			-0.00117			-0.43446			-0.40302
	-0.11			-0.00597			-0.4326			-0.40653
	-0.10527			-0.00538			-0.43028			-0.401
	-0.10383			-0.00876			-0.43679			-0.39672
	-0.10487			-0.00263			-0.43454			-0.3987
	-0.10685			-0.00776			-0.43564			-0.40438
	-0.10504			-0.00409			-0.43377			-0.39858
	-0.10157			-0.00203			-0.43416			-0.40495
	-0.1054			-0.00177			-0.43694			-0.40753
	-0.11418			-0.0049			-0.43529			-0.40553
	-0.10415			-0.00778			-0.43648			-0.40413
	-0.10568			-0.00133			-0.43722			-0.40142
	-0.10064			-0.00408			-0.43212			-0.39896
	-0.10438			-0.00585			-0.43547			-0.39931
	-0.10392			-0.00545			-0.43332			-0.40363
	-0.10724			-0.01183			-0.43528			-0.40182
	-0.10469			-0.00366			-0.43905			-0.39767
	-0.10208			-0.01004			-0.43777			-0.40473
	-0.1108			-0.00995			-0.44019			-0.40234
	-0.10619			-0.00646			-0.43471			-0.40369
	-0.10597			-0.00825			-0.43081			-0.39787
	-0.10634			-0.00701			-0.42847			-0.39749
	-0.1065			-0.01087			-0.42977			-0.40373
	-0.10357			-0.00214			-0.43201			-0.40163
	-0.10748			-0.00609			-0.43227			-0.39369
	-0.11127			-0.00647			-0.42905			-0.39837
	-0.1027			-0.00751			-0.44061			-0.40527
	-0.10471			-0.01135			-0.43625			-0.40829
	-0.10387			-0.00774			-0.43791			-0.40302
	-0.10724			-0.00639			-0.4346			-0.39955
	-0.10928			-0.00607			-0.43342			-0.4015
	-0.10605			-0.00653			-0.43444			-0.40518
	-0.10478			-0.00985			-0.43219			-0.40247
	-0.10681			-0.00346			-0.43663			-0.39824
	-0.1042			-0.00574			-0.43397			-0.39822
	-0.10309			-0.00691			-0.43197			-0.39928
	-0.11056			-0.00493			-0.4335			-0.39904
	-0.10764			-0.00213			-0.43225			-0.40046
	-0.10867			-0.0053			-0.43444			-0.40202
	-0.10667			-0.00395			-0.43538			-0.4033
	-0.10682			-0.00746			-0.43409			-0.40111
	-0.1084			-0.00654			-0.43453			-0.40348
	-0.1043			-0.01035			-0.43465			-0.39996
	-0.11278			-0.00465			-0.43201			-0.39897
	-0.10385			-0.00571			-0.43689			-0.40421
	-0.10602			-0.00629			-0.43309			-0.39731
	-0.1079			-0.01002			-0.43513			-0.39783
	-0.1059			-0.00905			-0.43584			-0.40867
	-0.10679			-0.00711			-0.43348			-0.40316
	-0.10636			-0.00938			-0.43243			-0.40019
	-0.10259			-0.01155			-0.43728			-0.3993
	-0.10023			0.000464			-0.43294			-0.40486
	-0.10519			-0.00256			-0.4344			-0.40248
	-0.10581			-0.0074			-0.43048			-0.40004
	-0.10805			-0.00429			-0.44028			-0.39996
	-0.10875			-0.00556			-0.43504			-0.39508
	-0.10253			-0.00651			-0.43362			-0.40582
	-0.10871			-0.00248			-0.43048			-0.4021
	-0.10648			-0.00348			-0.43611			-0.4021
	-0.10048			-0.00358			-0.43865			-0.39688
	-0.10643			-0.00385			-0.43523			-0.39848
	-0.10626			-0.00786			-0.43702			-0.40207
	-0.10397			-0.00497			-0.43805			-0.40083
	-0.10868			-0.0071			-0.43866			-0.40492
	-0.10611			-0.00982			-0.43357			-0.40431
	-0.10107			-0.00501			-0.43431			-0.40513
	-0.10871			-0.00062			-0.43166			-0.39923
	-0.1016			-0.00723			-0.43824			-0.40309
	-0.10849			-0.0088			-0.43743			-0.40196
	-0.10772			-0.00964			-0.43602			-0.40228
	-0.10692			-0.00633			-0.43393			-0.39918
	-0.1059			-0.01235			-0.43323			-0.398
	-0.10388			-0.01062			-0.43244			-0.40504
	-0.10242			-0.00895			-0.43471			-0.39979
	-0.10722			0.002234			-0.43756			-0.40027
	-0.10725			-0.01024			-0.43682			-0.40215
	-0.10855			-0.00709			-0.43361			-0.4059
	-0.10437			-0.00749			-0.43653			-0.3992
	-0.10465			-0.00419			-0.44253			-0.3996
	-0.1034			-0.00262			-0.43292			-0.39494
	-0.10249			-0.00707			-0.43416			-0.40108
	-0.10944			-0.00364			-0.4291			-0.39775
	-0.10683			-0.0068			-0.43242			-0.404
	-0.10496			-0.0095			-0.43191			-0.40265
	-0.1077			-0.01139			-0.43533			-0.401
	-0.1051			-0.00173			-0.43609			-0.40207
	-0.11176			-0.00773			-0.43664			-0.40025
	-0.10911			-0.01209			-0.43303			-0.40621
	-0.10526			-0.00234			-0.438			-0.40113
	-0.10151			-0.00736			-0.43143			-0.39958
	-0.10438			-0.00483			-0.43498			-0.39907
	-0.09963			-0.01435			-0.43576			-0.40159
	-0.10637			-0.00899			-0.43389			-0.40423
	-0.10508			-0.00519			-0.43373			-0.40195
	-0.10838			-0.00604			-0.43037			-0.40203
	-0.10602			-0.00781			-0.43543			-0.39725
	-0.11071			-0.01117			-0.43844			-0.40545
	-0.10552			-0.00727			-0.43983			-0.39936
	-0.10037			-0.00418			-0.42869			-0.40514
	-0.10691			-0.00553			-0.4378			-0.40461
	-0.10267			-0.00912			-0.43809			-0.40364
	-0.10592			-0.00244			-0.43832			-0.39861
	-0.10632			-0.00948			-0.4386			-0.40539
	-0.10861			-0.00562			-0.43474			-0.40835
	-0.10861			-0.00814			-0.42996			-0.4061
	-0.10169			-0.00958			-0.4317			-0.40146
	-0.10122			-0.00896			-0.43255			-0.40286
	-0.11214			-0.00498			-0.43477			-0.39916
	-0.10487			-0.00891			-0.43627			-0.40594
	-0.11028			-0.01087			-0.43824			-0.40554
	-0.11125			-0.00442			-0.43494			-0.39878
	-0.10504			-0.00558			-0.43399			-0.40121
	-0.10668			-0.00642			-0.43938			-0.40505
	-0.10328			-0.00355			-0.43604			-0.40181
	-0.10136			-0.00801			-0.44284			-0.40141
	-0.10849			-0.01081			-0.43822			-0.40505
	-0.10194			-0.01022			-0.43146			-0.40211
	-0.10277			-0.01136			-0.44052			-0.4056
	-0.10165			-0.00733			-0.43966			-0.40717
	-0.10513			-0.00867			-0.43731			-0.39988
	-0.10156			-0.0071			-0.43457			-0.39979
	-0.10408			-0.009			-0.43284			-0.40212
	-0.10045			-0.00605			-0.43962			-0.39358
	-0.10113			-0.00453			-0.43053			-0.39439
	-0.10801			-0.00794			-0.43504			-0.40462
	-0.10889			-0.00591			-0.44206			-0.40153
	-0.10183			-0.01105			-0.44067			-0.39943
	-0.10287			-0.00895			-0.43473			-0.40394
	-0.10595			-0.0116			-0.43794			-0.40413
	-0.11027			-0.00791			-0.43091			-0.40323
	-0.10276			-0.00388			-0.43609			-0.39844
	-0.10622			-0.00881			-0.43759			-0.40188
	-0.09956			-0.00642			-0.43534			-0.39839
	-0.10872			-0.01392			-0.43241			-0.40273
	-0.10462			-0.01243			-0.43553			-0.40493
	-0.10062			-0.00802			-0.43156			-0.401
	-0.10452			-0.0093			-0.43985			-0.40176
	-0.10999			-0.00864			-0.43951			-0.40505
	-0.10897			-0.00349			-0.4319			-0.40687
	-0.1006			-0.01205			-0.43804			-0.40414
	-0.10776			-0.01197			-0.43686			-0.39637
	-0.1055			-0.00983			-0.43775			-0.40107
	-0.10822			-0.00999			-0.43801			-0.39989
	-0.10871			-0.00898			-0.43419			-0.40358
	-0.1036			-0.00983			-0.43297			-0.40966
	-0.10181			-0.00604			-0.433			-0.40296
	-0.11001			-0.01123			-0.43562			-0.40061
	-0.10635			-0.01081			-0.43321			-0.4098
	-0.10558			-0.00772			-0.43265			-0.40308
	-0.10883			-0.00901			-0.43927			-0.40492
	-0.10636			-0.00206			-0.43764			-0.4076
	-0.10567			-0.00885			-0.43732			-0.40244
	-0.10682			-0.01144			-0.43372			-0.40349
	-0.10611			-0.01564			-0.43279			-0.41137
	-0.1073			-0.00948			-0.4362			-0.3987
	-0.10555			-0.00719			-0.43413			-0.3998
	-0.10667			-0.0096			-0.43149			-0.3994
	-0.10597			-0.0068			-0.43831			-0.39855
	-0.10481			-0.00722			-0.43917			-0.40604
	-0.10478			-0.00968			-0.43376			-0.40013
	-0.10121			-0.00829			-0.43677			-0.39966
	-0.10222			-0.00349			-0.43603			-0.3997
	-0.10294			-0.00934			-0.43414			-0.40202
	-0.1067			-0.01002			-0.43715			-0.4032
	-0.10717			-0.01206			-0.43815			-0.40042
	-0.10664			-0.00476			-0.43278			-0.40431
	-0.10881			-0.01321			-0.43623			-0.40112
	-0.11055			-0.01091			-0.4395			-0.40078
	-0.10531			-0.01134			-0.43439			-0.39986
	-0.10663			-0.0095			-0.43477			-0.3992
	-0.10802			-0.01364			-0.43563			-0.4025
	-0.10624			-0.01103			-0.43729			-0.3988
	-0.1065			-0.00878			-0.43131			-0.3981
	-0.10708			-0.00812			-0.43563			-0.40347
	-0.10975			-0.01695			-0.43947			-0.40659
	-0.1083			-0.01105			-0.43856			-0.40198
	-0.10726			-0.00795			-0.43313			-0.39679
	-0.10694			-0.01671			-0.43928			-0.4021
	-0.10797			-0.01517			-0.43343			-0.40203
	-0.10481			-0.00945			-0.44054			-0.40279
	-0.10168			-0.0065			-0.4326			-0.40049
	-0.10293			-0.00824			-0.43907			-0.40242
	-0.10783			-0.01389			-0.43752			-0.40576
	-0.10809			-0.0054			-0.43001			-0.40036
	-0.10941			-0.01322			-0.43269			-0.40331
	-0.11055			-0.01119			-0.44155			-0.39835
	-0.10659			-0.00202			-0.43541			-0.40211
	-0.10075			-0.00966			-0.43853			-0.40504
	-0.10848			-0.00652			-0.43873			-0.40126
	-0.10606			-0.01271			-0.4372			-0.40607
	-0.10605			-0.01097			-0.43427			-0.40188
	-0.10974			-0.01209			-0.44034			-0.40092
	-0.10736			-0.00687			-0.43463			-0.40019
	-0.10738			-0.01646			-0.43361			-0.4052
	-0.11184			-0.01201			-0.43713			-0.40364
	-0.10599			-0.01308			-0.43637			-0.40128
	-0.10156			-0.00973			-0.43025			-0.39917
	-0.10572			-0.01589			-0.43516			-0.40129
	-0.10568			-0.00575			-0.43889			-0.40305
	-0.10647			-0.00413			-0.4349			-0.40039
	-0.10596			-0.00942			-0.43534			-0.41118
	-0.11027			-0.00903			-0.43713			-0.40507
	-0.10706			-0.01027			-0.43341			-0.39924
	-0.10505			-0.01307			-0.43256			-0.40699
	-0.10646			-0.01476			-0.43635			-0.39775
	-0.10534			-0.01108			-0.43702			-0.40293
	-0.10414			-0.01044			-0.4359			-0.41105
	-0.10667			-0.01132			-0.4337			-0.39966
	-0.10758			-0.01046			-0.43665			-0.40412
	-0.1049			-0.00857			-0.44172			-0.40117
	-0.10794			-0.01018			-0.43889			-0.405
	-0.10463			-0.00964			-0.43541			-0.4058
	-0.10501			-0.00658			-0.44102			-0.40637
	-0.11109			-0.01333			-0.43439			-0.40139
	-0.10861			-0.00565			-0.43459			-0.40063
	-0.10372			-0.00468			-0.4352			-0.39928
	-0.11074			-0.01241			-0.43689			-0.40449
	-0.10549			-0.01169			-0.43643			-0.39932
	-0.11091			-0.00855			-0.43247			-0.3987
	-0.11282			-0.00741			-0.44006			-0.39921
	-0.10799			-0.00978			-0.43264			-0.40108
	-0.10719			-0.01271			-0.43642			-0.39773
	-0.10437			-0.01447			-0.43942			-0.4074
	-0.10852			-0.01133			-0.44033			-0.39995
	-0.10333			-0.01129			-0.43579			-0.40017
	-0.10789			-0.00803			-0.43918			-0.40065
	-0.10828			-0.00956			-0.43475			-0.39969
	-0.10694			-0.00867			-0.43753			-0.40009
	-0.10586			-0.01306			-0.44044			-0.40363
	-0.10823			-0.00913			-0.43947			-0.40163
	-0.10596			-0.01309			-0.43491			-0.40225
	-0.10515			-0.00873			-0.43497			-0.39916
	-0.10406			-0.0184			-0.43653			-0.40698
	-0.10457			-0.01216			-0.43397			-0.40136
	-0.10641			-0.00932			-0.43533			-0.4028
	-0.10997			-0.00901			-0.44019			-0.39819
	-0.10286			-0.00834			-0.44255			-0.40467
	-0.10519			-0.01462			-0.43549			-0.40202
	-0.11884			-0.01885			-0.43785			-0.40057
	-0.108			-0.01981			-0.43683			-0.40178
	-0.10226			-0.01537			-0.43463			-0.3974
	-0.10368			-0.00787			-0.43775			-0.39871
	-0.10886			-0.01496			-0.44317			-0.40349
	-0.11074			-0.00806			-0.44001			-0.40225
	-0.10809			-0.01102			-0.43629			-0.40441
	-0.10936			-0.01191			-0.43935			-0.40448
	-0.10917			-0.01073			-0.4429			-0.402
	-0.10349			-0.01465			-0.43371			-0.40137
	-0.11314			-0.01134			-0.43689			-0.40097
	-0.10814			-0.01079			-0.43565			-0.40002
	-0.10816			-0.01289			-0.43637			-0.40337
	-0.10522			-0.01035			-0.43777			-0.40266
	-0.11138			-0.01245			-0.4355			-0.40452
	-0.10623			-0.00942			-0.43769			-0.40893
	-0.10797			-0.00664			-0.43437			-0.40295
	-0.10812			-0.00952			-0.43955			-0.40849
	-0.1043			-0.00651			-0.43985			-0.40589
	-0.10661			-0.01343			-0.43884			-0.4069
	-0.11109			-0.00785			-0.43674			-0.40261
	-0.10605			-0.01512			-0.438			-0.40172
	-0.10576			-0.01073			-0.43693			-0.40756
	-0.10708			-0.01076			-0.43563			-0.40077
	-0.1068			-0.01218			-0.43953			-0.39813
	-0.10584			-0.01328			-0.44105			-0.41032
	-0.10653			-0.01803			-0.44079			-0.40321
	-0.10755			-0.00955			-0.43366			-0.40515
	-0.10998			-0.01519			-0.43632			-0.40405
	-0.10262			-0.01629			-0.43621			-0.40178
	-0.1047			-0.01993			-0.4363			-0.40309
	-0.10613			-0.011			-0.43822			-0.40218
	-0.10856			-0.00721			-0.43503			-0.40387
	-0.11049			-0.00798			-0.43505			-0.40498
	-0.10945			-0.01412			-0.43982			-0.40796
	-0.10533			-0.01435			-0.43617			-0.40498
	-0.10538			-0.01092			-0.43893			-0.41036
	-0.10877			-0.00944			-0.44148			-0.39852
	-0.10634			-0.01316			-0.43779			-0.40864
	-0.1087			-0.01289			-0.43955			-0.40091
	-0.10341			-0.0111			-0.43301			-0.40622
	-0.10612			-0.00931			-0.44063			-0.40787
	-0.09946			-0.017			-0.43623			-0.40023
	-0.10954			-0.01367			-0.43777			-0.4078
	-0.10561			-0.01037			-0.43493			-0.40575
	-0.11021			-0.01174			-0.43859			-0.40336
	-0.10674			-0.01289			-0.43306			-0.4082
	-0.10867			-0.0127			-0.43626			-0.40366
	-0.11338			-0.01395			-0.44076			-0.40213
	-0.10763			-0.01301			-0.43773			-0.40329
	-0.10609			-0.01176			-0.43673			-0.40102
	-0.10876			-0.01887			-0.44088			-0.40402
	-0.11122			-0.01124			-0.43612			-0.40275
	-0.10297			-0.00842			-0.43521			-0.40566
	-0.11309			-0.01038			-0.44129			-0.40162
	-0.10416			-0.01136			-0.43277			-0.40518
	-0.10875			-0.00901			-0.43633			-0.40758
	-0.10897			-0.01342			-0.43819			-0.40089
	-0.10876			-0.01559			-0.42998			-0.39914
	-0.10518			-0.01457			-0.43648			-0.40155
	-0.10698			-0.0182			-0.43924			-0.4066
	-0.1076			-0.01088			-0.4369			-0.40077
	-0.10698			-0.01557			-0.43201			-0.39706
	-0.1078			-0.01014			-0.43551			-0.4004
	-0.10056			-0.01163			-0.43679			-0.39883
	-0.10314			-0.01373			-0.43565			-0.4062
	-0.10707			-0.01501			-0.44052			-0.39711
	-0.10789			-0.01184			-0.43824			-0.40661
	-0.10477			-0.0125			-0.43438			-0.40219
	-0.11194			-0.01499			-0.43773			-0.40682
	-0.10333			-0.01608			-0.43972			-0.40372
	-0.10825			-0.01406			-0.43455			-0.40395
	-0.10683			-0.01238			-0.43198			-0.40391
	-0.10557			-0.01689			-0.44101			-0.40696
	-0.10798			-0.01455			-0.44031			-0.40049
	-0.1111			-0.0144			-0.44121			-0.40587
	-0.10961			-0.01259			-0.44029			-0.40981
	-0.10475			-0.01575			-0.43595			-0.40404
	-0.10794			-0.01522			-0.4382			-0.40068
	-0.11277			-0.01259			-0.44456			-0.40102
	-0.11079			-0.01298			-0.44067			-0.40687
	-0.10761			-0.01024			-0.43065			-0.40742
	-0.10856			-0.01561			-0.44381			-0.40755
	-0.10685			-0.01211			-0.43445			-0.40009
	-0.10942			-0.00765			-0.43726			-0.4005
	-0.11193			-0.00995			-0.43521			-0.40373
	-0.11226			-0.01499			-0.43927			-0.4058
	-0.10976			-0.01454			-0.43839			-0.40447
	-0.10845			-0.00988			-0.44086			-0.39854
	-0.10511			-0.01631			-0.43775			-0.41212
	-0.11371			-0.00997			-0.43739			-0.40484
	-0.10871			-0.01895			-0.43794			-0.39694
	-0.11495			-0.01059			-0.43964			-0.39915
	-0.1138			-0.01653			-0.4396			-0.40635
	-0.10366			-0.01446			-0.43812			-0.40543
	-0.10664			-0.01228			-0.43969			-0.40433
	-0.10657			-0.01077			-0.44217			-0.40152
	-0.10567			-0.01736			-0.43798			-0.41035
	-0.1123			-0.00807			-0.4351			-0.40741
	-0.10736			-0.01431			-0.43546			-0.4044
	-0.10556			-0.01218			-0.43743			-0.40411
	-0.10847			-0.0168			-0.4359			-0.39961
	-0.10004			-0.01538			-0.43508			-0.40376
	-0.10947			-0.01632			-0.43612			-0.4048
	-0.10752			-0.01693			-0.43942			-0.40698
	-0.10592			-0.01104			-0.43408			-0.40485
	-0.10838			-0.01327			-0.43573			-0.41041
	-0.10608			-0.01746			-0.43678			-0.39914
	-0.11315			-0.01293			-0.43822			-0.40325
	-0.11296			-0.01219			-0.43717			-0.40867
	-0.10603			-0.01379			-0.438			-0.40434
	-0.11267			-0.01493			-0.43934			-0.40423
	-0.11064			-0.01048			-0.43654			-0.40552
	-0.10864			-0.01843			-0.43714			-0.40241
	-0.10739			-0.01095			-0.4306			-0.40537
	-0.10725			-0.01552			-0.43486			-0.40384
	-0.10263			-0.01789			-0.43744			-0.4076
	-0.10908			-0.01783			-0.43813			-0.4002
	-0.10597			-0.01239			-0.43639			-0.40112
	-0.11502			-0.01626			-0.44207			-0.4086
	-0.10813			-0.01638			-0.43973			-0.40293
	-0.10733			-0.01391			-0.4375			-0.40343
	-0.11113			-0.00893			-0.43775			-0.40504
	-0.1128			-0.01476			-0.4343			-0.40442
	-0.11061			-0.01781			-0.4373			-0.40381
	-0.10502			-0.01769			-0.43814			-0.40167
	-0.10958			-0.01225			-0.44031			-0.40324
	-0.10565			-0.01449			-0.43993			-0.40583
	-0.10092			-0.01397			-0.43973			-0.40512
	-0.10664			-0.01724			-0.43909			-0.401
	-0.11066			-0.01768			-0.43906			-0.40527
	-0.11299			-0.01187			-0.43497			-0.40955
	-0.106			-0.01452			-0.439			-0.40188
	-0.10826			-0.01575			-0.43493			-0.40571
	-0.10786			-0.01241			-0.43521			-0.40294
	-0.10667			-0.01627			-0.43798			-0.40332
	-0.11188			-0.01909			-0.43644			-0.41026
	-0.1136			-0.0134			-0.44065			-0.39928
	-0.1106			-0.00963			-0.44349			-0.3981
	-0.10553			-0.01336			-0.43342			-0.41053
	-0.11081			-0.01794			-0.43892			-0.40171
	-0.10458			-0.01445			-0.43821			-0.40403
	-0.10871			-0.01514			-0.44595			-0.40493
	-0.10873			-0.01498			-0.43922			-0.40509
	-0.11219			-0.01023			-0.44436			-0.4014
	-0.10958			-0.0189			-0.44451			-0.40602
	-0.10432			-0.01878			-0.44074			-0.40508
	-0.10924			-0.01577			-0.43588			-0.39594
	-0.10967			-0.01502			-0.44506			-0.40164
	-0.1116			-0.01666			-0.44186			-0.40158
	-0.10391			-0.01403			-0.4308			-0.40853
	-0.1084			-0.01577			-0.43849			-0.39822
	-0.11213			-0.01422			-0.43925			-0.40034
	-0.10935			-0.01179			-0.43692			-0.40392
	-0.10566			-0.01155			-0.44238			-0.40199
	-0.10487			-0.01548			-0.43948			-0.4105
	-0.10541			-0.01178			-0.43434			-0.40755
	-0.10466			-0.01167			-0.43803			-0.40177
	-0.11073			-0.01865			-0.43853			-0.39862
	-0.10857			-0.01364			-0.4376			-0.40469
	-0.10539			-0.01151			-0.43616			-0.4022
	-0.10922			-0.01372			-0.43535			-0.40287
	-0.10608			-0.01508			-0.43911			-0.40637
	-0.1054			-0.01154			-0.43973			-0.40444
	-0.10525			-0.0143			-0.4395			-0.40489
	-0.10498			-0.02235			-0.43451			-0.41007
	-0.10936			-0.01969			-0.43503			-0.4066
	-0.10875			-0.01567			-0.44015			-0.40001
	-0.10706			-0.01352			-0.44381			-0.39953
	-0.10947			-0.01558			-0.43406			-0.40343
	-0.11189			-0.01756			-0.44337			-0.40085
	-0.111			-0.02123			-0.43546			-0.40567
	-0.10557			-0.01909			-0.43904			-0.40501
	-0.10751			-0.01486			-0.4337			-0.39948
	-0.11058			-0.01469			-0.43488			-0.40716
	-0.10855			-0.01783			-0.43848			-0.40161
	-0.10511			-0.01757			-0.43636			-0.40172
	-0.11163			-0.02195			-0.44023			-0.39998
	-0.11044			-0.01129			-0.4361			-0.40302
	-0.11147			-0.01503			-0.43953			-0.4053
	-0.11055			-0.01835			-0.4418			-0.4066
	-0.11168			-0.01405			-0.43902			-0.40601
	-0.10984			-0.01612			-0.44341			-0.40483
	-0.11255			-0.01626			-0.44348			-0.40114
	-0.10716			-0.01695			-0.43588			-0.40158
	-0.10571			-0.02186			-0.43922			-0.40067
	-0.10358			-0.01419			-0.4362			-0.4031
	-0.11062			-0.01652			-0.43993			-0.40417
	-0.10879			-0.01771			-0.44368			-0.40181
	-0.10821			-0.01465			-0.43818			-0.40551
	-0.11459			-0.01591			-0.43824			-0.40934
	-0.10258			-0.01492			-0.43632			-0.40742
	-0.10604			-0.01257			-0.43808			-0.40561
	-0.11006			-0.01741			-0.43562			-0.40418
	-0.10989			-0.02134			-0.43436			-0.4083
	-0.10844			-0.01648			-0.44334			-0.39939
	-0.10562			-0.01261			-0.44078			-0.40805
	-0.10577			-0.0148			-0.44104			-0.40176
	-0.11093			-0.01151			-0.43659			-0.40721
	-0.1105			-0.01654			-0.43635			-0.40142
	-0.10564			-0.01341			-0.44037			-0.40438
	-0.10618			-0.01844			-0.44141			-0.40288
	-0.11268			-0.01996			-0.43749			-0.40766
	-0.11455			-0.02032			-0.43457			-0.40653
	-0.10938			-0.02225			-0.43761			-0.40615
	-0.10925			-0.01327			-0.44118			-0.4098
	-0.10934			-0.016			-0.43625			-0.40499
	-0.11629			-0.01938			-0.44121			-0.39969
	-0.11118			-0.01785			-0.43911			-0.40815
	-0.10626			-0.01855			-0.43852			-0.40985
	-0.11004			-0.01273			-0.43925			-0.40187
	-0.1119			-0.01294			-0.44013			-0.39532
	-0.1116			-0.0152			-0.43703			-0.40695
	-0.10272			-0.01798			-0.43762			-0.40317
	-0.11154			-0.02068			-0.44024			-0.40478
	-0.11413			-0.01574			-0.43645			-0.40474
	-0.10665			-0.0165			-0.43642			-0.41007
	-0.11485			-0.0162			-0.43737			-0.40216
	-0.10783			-0.01717			-0.43936			-0.40945
	-0.11136			-0.02076			-0.44026			-0.40134
	-0.10709			-0.01839			-0.43964			-0.40605
	-0.10962			-0.01993			-0.4387			-0.40102
	-0.11317			-0.01825			-0.44299			-0.40262
	-0.11055			-0.01856			-0.44037			-0.40103
	-0.10373			-0.01782			-0.43945			-0.40901
	-0.11076			-0.01304			-0.44091			-0.40671
	-0.10384			-0.02047			-0.44161			-0.40704
	-0.1087			-0.01783			-0.44165			-0.40159
	-0.11123			-0.01826			-0.44382			-0.40638
	-0.11501			-0.02585			-0.44459			-0.40934
	-0.10565			-0.01588			-0.43672			-0.40475
	-0.11017			-0.0124			-0.43846			-0.40403
	-0.10654			-0.01704			-0.44176			-0.40823
	-0.11038			-0.01536			-0.44171			-0.4066
	-0.11484			-0.01792			-0.43708			-0.40388
	-0.11263			-0.01649			-0.43867			-0.40749
	-0.11005			-0.02004			-0.43855			-0.40028
	-0.11502			-0.02103			-0.43541			-0.4027
	-0.1076			-0.01616			-0.43635			-0.40015
	-0.11037			-0.01981			-0.44217			-0.40403
	-0.11512			-0.01691			-0.44589			-0.41056
	-0.11202			-0.02203			-0.43662			-0.40556
	-0.10567			-0.01874			-0.43575			-0.41079
	-0.11362			-0.01779			-0.43999			-0.40508
	-0.11361			-0.01701			-0.43525			-0.4059
	-0.11688			-0.01505			-0.43991			-0.40504
	-0.10338			-0.01685			-0.4448			-0.4009
	-0.11078			-0.01724			-0.43646			-0.403
	-0.10653			-0.01776			-0.43717			-0.40645
	-0.11163			-0.01428			-0.44063			-0.41046
	-0.10882			-0.01739			-0.44303			-0.40786
	-0.1167			-0.01446			-0.44215			-0.40208
	-0.11362			-0.01568			-0.44046			-0.40793
	-0.10817			-0.01681			-0.44186			-0.40268
	-0.11032			-0.02315			-0.43696			-0.40848
	-0.11054			-0.01949			-0.44237			-0.40486
	-0.10881			-0.01811			-0.4379			-0.40315
	-0.10734			-0.02022			-0.43551			-0.40471
	-0.11317			-0.01947			-0.43632			-0.40944
	-0.11233			-0.01285			-0.43933			-0.40238
	-0.10424			-0.01215			-0.43603			-0.40395
	-0.10713			-0.01021			-0.44294			-0.4014
	-0.10784			-0.01318			-0.44041			-0.40413
	-0.11211			-0.01877			-0.43964			-0.40631
	-0.10343			-0.01647			-0.43858			-0.4041
	-0.10713			-0.02326			-0.43754			-0.40504
	-0.10984			-0.02013			-0.4353			-0.41115
	-0.11303			-0.01634			-0.4395			-0.40747
	-0.11062			-0.01568			-0.43602			-0.41097
	-0.10918			-0.01982			-0.44154			-0.41022
	-0.11135			-0.01948			-0.43307			-0.40379
	-0.11028			-0.01439			-0.43457			-0.4086
	-0.10988			-0.02445			-0.43678			-0.40569
	-0.10979			-0.01779			-0.44146			-0.40309
	-0.10626			-0.01599			-0.44239			-0.4064
	-0.11002			-0.01897			-0.43649			-0.40661
	-0.1137			-0.02129			-0.44103			-0.40655
	-0.11238			-0.01482			-0.44095			-0.41024
	-0.11393			-0.01735			-0.44876			-0.40162
	-0.11048			-0.01798			-0.44051			-0.40688
	-0.11024			-0.01233			-0.44297			-0.40349
	-0.11017			-0.01529			-0.4397			-0.40359
	-0.10798			-0.01507			-0.43984			-0.40388
	-0.10921			-0.02164			-0.44044			-0.41211
	-0.11277			-0.02399			-0.43881			-0.40074
	-0.10335			-0.02053			-0.43747			-0.40962
	-0.10723			-0.01614			-0.44065			-0.40679
	-0.11105			-0.01884			-0.44089			-0.40411
	-0.10916			-0.01719			-0.44141			-0.4026
	-0.1136			-0.02563			-0.44036			-0.40489
	-0.10438			-0.01772			-0.4465			-0.40415
	-0.11139			-0.01761			-0.43506			-0.40687
	-0.11156			-0.0135			-0.44395			-0.40009
	-0.10983			-0.02215			-0.44346			-0.40483
	-0.10711			-0.02173			-0.44367			-0.40528
	-0.106			-0.016			-0.43507			-0.40968
	-0.10888			-0.01128			-0.44387			-0.4044
	-0.11239			-0.01777			-0.43485			-0.40748
	-0.11296			-0.02363			-0.43351			-0.40444
	-0.11374			-0.02579			-0.44043			-0.4085
	-0.11394			-0.02108			-0.43898			-0.39791
	-0.10779			-0.01956			-0.43842			-0.4023
	-0.11057			-0.01973			-0.43983			-0.40203
	-0.1036			-0.01637			-0.44262			-0.40364
	-0.10858			-0.01972			-0.43729			-0.40861
	-0.10581			-0.02114			-0.43857			-0.40169
	-0.11079			-0.0163			-0.4333			-0.40083
	-0.11073			-0.01444			-0.43901			-0.40298
	-0.11115			-0.01777			-0.43727			-0.40721
	-0.11146			-0.01517			-0.44157			-0.40653
	-0.11285			-0.01836			-0.43489			-0.40529
	-0.11098			-0.01723			-0.43983			-0.40669
	-0.1144			-0.02016			-0.44225			-0.40169
	-0.11353			-0.02424			-0.43927			-0.40585
	-0.11176			-0.0188			-0.4415			-0.4088
	-0.10924			-0.02357			-0.44			-0.40841
	-0.11389			-0.02075			-0.4384			-0.40934
	-0.10903			-0.02114			-0.44156			-0.40778
	-0.11023			-0.02065			-0.43853			-0.40447
	-0.11395			-0.02469			-0.43627			-0.40829
	-0.11514			-0.02027			-0.44012			-0.40245
	-0.10863			-0.01851			-0.44366			-0.4071
	-0.1126			-0.02119			-0.43721			-0.40314
	-0.10794			-0.01769			-0.44097			-0.40758
	-0.10873			-0.02046			-0.44376			-0.40464
	-0.11159			-0.01915			-0.44295			-0.40582
	-0.10669			-0.01591			-0.4428			-0.41125
	-0.11227			-0.02301			-0.44065			-0.40549
	-0.10719			-0.01759			-0.4399			-0.40479
	-0.11377			-0.01438			-0.44557			-0.41094
	-0.1101			-0.01782			-0.44591			-0.40335
	-0.10535			-0.02114			-0.43967			-0.4091
	-0.11671			-0.01863			-0.43459			-0.40428
	-0.10771			-0.02609			-0.43734			-0.4071
	-0.10832			-0.02008			-0.44003			-0.4037
	-0.10747			-0.0226			-0.44229			-0.40505
	-0.11755			-0.01943			-0.44493			-0.40751
	-0.11111			-0.02187			-0.43992			-0.40949
	-0.10992			-0.02052			-0.43752			-0.40889
	-0.1087			-0.02406			-0.43763			-0.40116
	-0.11424			-0.02117			-0.44001			-0.40475
	-0.11125			-0.02098			-0.44133			-0.39897
	-0.10731			-0.01468			-0.43626			-0.40532
	-0.10843			-0.02015			-0.43887			-0.40799
	-0.11262			-0.01796			-0.43963			-0.40998
	-0.10984			-0.018			-0.44204			-0.40362
	-0.11171			-0.0242			-0.4389			-0.40705
	-0.10926			-0.02205			-0.43764			-0.40338
	-0.10789			-0.01579			-0.44023			-0.4036
	-0.11722			-0.021			-0.4425			-0.40566
	-0.11029			-0.01954			-0.44375			-0.40585
	-0.10873			-0.01844			-0.43917			-0.40986
	-0.10939			-0.02135			-0.43871			-0.40713
	-0.11743			-0.02281			-0.43555			-0.39792
	-0.11027			-0.01651			-0.43771			-0.404
	-0.11363			-0.02057			-0.44485			-0.40968
	-0.11233			-0.01696			-0.44259			-0.40284
	-0.11741			-0.01748			-0.43717			-0.41393
	-0.10539			-0.01908			-0.43953			-0.40844
	-0.11474			-0.0215			-0.44145			-0.40334
	-0.11062			-0.0223			-0.44072			-0.40078
	-0.11155			-0.02043			-0.44121			-0.4068
	-0.11285			-0.01301			-0.43532			-0.4038
	-0.11784			-0.02261			-0.44193			-0.41073
	-0.11016			-0.02465			-0.44548			-0.41063
	-0.1137			-0.01641			-0.43717			-0.40537
	-0.108			-0.02133			-0.44416			-0.40888
	-0.1107			-0.01862			-0.44228			-0.40442
	-0.11465			-0.02378			-0.4343			-0.40211
	-0.10532			-0.02011			-0.44152			-0.40802
	-0.11137			-0.02561			-0.44131			-0.40751
	-0.11378			-0.01838			-0.43798			-0.40449
	-0.10875			-0.01873			-0.43881			-0.40766
	-0.11137			-0.02106			-0.44059			-0.4066
	-0.11326			-0.01885			-0.4509			-0.4105
	-0.11291			-0.0266			-0.44299			-0.41025
	-0.10801			-0.01776			-0.44079			-0.40676
	-0.11423			-0.01825			-0.44187			-0.40797
	-0.11491			-0.01986			-0.44114			-0.40891
	-0.11223			-0.02358			-0.43852			-0.40972
	-0.10484			-0.01994			-0.43564			-0.4089
	-0.1116			-0.01636			-0.4433			-0.40668
	-0.11109			-0.01906			-0.438			-0.40564
	-0.11234			-0.01917			-0.44326			-0.40956
	-0.10668			-0.02684			-0.44118			-0.40595
	-0.10963			-0.02025			-0.43644			-0.40416
	-0.11005			-0.0212			-0.44272			-0.40505
	-0.11168			-0.0235			-0.44106			-0.4114
	-0.10662			-0.02153			-0.4442			-0.41397
	-0.11561			-0.02132			-0.44269			-0.40601
	-0.11204			-0.02154			-0.44391			-0.40821
	-0.11039			-0.01805			-0.44549			-0.40031
	-0.11203			-0.02052			-0.44065			-0.41114
	-0.11109			-0.02048			-0.45051			-0.40792
	-0.11411			-0.02324			-0.44259			-0.40736
	-0.1106			-0.01978			-0.44031			-0.40872
	-0.11549			-0.02162			-0.44207			-0.40717
	-0.10424			-0.01746			-0.44334			-0.40897
	-0.10992			-0.01643			-0.4348			-0.40633
	-0.10277			-0.02139			-0.44204			-0.40678
	-0.1116			-0.02255			-0.43573			-0.40926
	-0.10453			-0.02081			-0.4421			-0.41057
	-0.11444			-0.02411			-0.44133			-0.40469
	-0.11312			-0.02084			-0.43831			-0.40653
	-0.11015			-0.02526			-0.4387			-0.405
	-0.10738			-0.02192			-0.4377			-0.40151
	-0.11338			-0.02226			-0.43902			-0.41039
	-0.11609			-0.02476			-0.43964			-0.40428
	-0.10984			-0.01855			-0.44457			-0.4112
	-0.11113			-0.02452			-0.4442			-0.40306
	-0.10989			-0.02356			-0.43961			-0.40731
	-0.11035			-0.02042			-0.44246			-0.40403
	-0.10961			-0.02049			-0.44386			-0.41794
	-0.11126			-0.01579			-0.44275			-0.40939
	-0.11194			-0.01665			-0.4413			-0.4048
	-0.10745			-0.02403			-0.44738			-0.40959
	-0.11455			-0.02672			-0.44061			-0.41024
	-0.10374			-0.01787			-0.44366			-0.40714
	-0.10687			-0.01863			-0.44281			-0.40851
	-0.11386			-0.02421			-0.43775			-0.40924
	-0.10986			-0.01965			-0.44128			-0.40507
	-0.11062			-0.01859			-0.43655			-0.40774
	-0.10589			-0.02392			-0.4479			-0.41205
	-0.11232			-0.02032			-0.4436			-0.41076
	-0.11061			-0.02478			-0.44094			-0.40701
	-0.11026			-0.02107			-0.44604			-0.40796
	-0.11022			-0.02912			-0.4358			-0.40529
	-0.11134			-0.02334			-0.44382			-0.40471
	-0.11045			-0.02155			-0.44382			-0.40763
	-0.11167			-0.02096			-0.44083			-0.40939
	-0.11237			-0.02115			-0.44041			-0.40187
	-0.11618			-0.0208			-0.44382			-0.41146
	-0.11351			-0.01408			-0.44108			-0.41033
	-0.11331			-0.01818			-0.44162			-0.40309
	-0.11222			-0.03147			-0.43993			-0.40952
	-0.10539			-0.02237			-0.44278			-0.40808
	-0.10946			-0.02295			-0.44422			-0.41137
	-0.11887			-0.02137			-0.44519			-0.40815
	-0.11007			-0.01896			-0.44924			-0.41135
	-0.11301			-0.02003			-0.44231			-0.40758
	-0.11405			-0.02203			-0.44241			-0.41177
	-0.11313			-0.01916			-0.44044			-0.41597
	-0.10264			-0.02316			-0.44196			-0.41153
	-0.11119			-0.0205			-0.4415			-0.41453
	-0.11266			-0.02434			-0.44338			-0.40682
	-0.1095			-0.01972			-0.44813			-0.40783
	-0.11485			-0.02655			-0.4426			-0.40655
	-0.10784			-0.01768			-0.44297			-0.41084
	-0.11548			-0.02601			-0.4436			-0.40801
	-0.10441			-0.022			-0.44758			-0.40758
	-0.11338			-0.01536			-0.44441			-0.40648
	-0.10858			-0.02595			-0.44089			-0.40274
	-0.11182			-0.02254			-0.44645			-0.40463
	-0.11359			-0.02564			-0.43986			-0.40749
	-0.11495			-0.02597			-0.44183			-0.41166
	-0.11209			-0.02323			-0.44155			-0.40668
	-0.11371			-0.0233			-0.43866			-0.40738
	-0.10943			-0.01964			-0.43821			-0.40959
	-0.11079			-0.02275			-0.44357			-0.40843
	-0.11324			-0.02103			-0.44328			-0.41314
	-0.11128			-0.0206			-0.43938			-0.41432
	-0.11424			-0.02481			-0.43761			-0.40933
	-0.11233			-0.02281			-0.4431			-0.41093
	-0.1108			-0.01694			-0.44255			-0.41024
	-0.11286			-0.01947			-0.4432			-0.41499
	-0.11524			-0.02291			-0.43928			-0.40527
	-0.1121			-0.02111			-0.44006			-0.40845
	-0.11128			-0.02371			-0.44171			-0.40741
	-0.10934			-0.02703			-0.44606			-0.39903
	-0.11521			-0.02289			-0.43773			-0.4074
	-0.1107			-0.01885			-0.43835			-0.40579
	-0.10524			-0.02249			-0.43903			-0.40558
	-0.11514			-0.02349			-0.4426			-0.41113
	-0.11494			-0.02234			-0.44075			-0.40321
	-0.11082			-0.02408			-0.44295			-0.41333
	-0.11112			-0.02461			-0.44501			-0.41003
	-0.11033			-0.02037			-0.44233			-0.40966
	-0.10926			-0.02118			-0.44085			-0.41344
	-0.11077			-0.02012			-0.43986			-0.40564
	-0.11394			-0.0198			-0.44394			-0.40876
	-0.10877			-0.02163			-0.44752			-0.4073
	-0.11082			-0.02166			-0.44595			-0.40336
	-0.10767			-0.02257			-0.446			-0.40538
	-0.10967			-0.02129			-0.43714			-0.41188
	-0.10945			-0.0265			-0.44408			-0.40452
	-0.11322			-0.02663			-0.44307			-0.40866
	-0.11497			-0.01222			-0.44402			-0.41012
	-0.11371			-0.02458			-0.44252			-0.40765
	-0.11345			-0.02285			-0.43753			-0.41354
	-0.11122			-0.02152			-0.44615			-0.40839
	-0.10831			-0.02301			-0.44359			-0.41043
	-0.10984			-0.02149			-0.44101			-0.41592
	-0.11132			-0.03056			-0.44075			-0.40553
	-0.11339			-0.02509			-0.44303			-0.40858
	-0.10878			-0.02307			-0.44093			-0.40649
	-0.11308			-0.02645			-0.44257			-0.40937
	-0.11248			-0.02416			-0.43948			-0.40979
	-0.11239			-0.02213			-0.44588			-0.40679
	-0.11389			-0.02716			-0.43897			-0.4049
	-0.11282			-0.02275			-0.44589			-0.41189
	-0.11057			-0.02459			-0.44311			-0.40686
	-0.11641			-0.01901			-0.44125			-0.40382
	-0.11626			-0.02361			-0.44183			-0.4038
	-0.11129			-0.02886			-0.4427			-0.41253
	-0.11103			-0.0246			-0.44485			-0.4132
	-0.11676			-0.02661			-0.4418			-0.40645
	-0.11822			-0.025			-0.44374			-0.41008
	-0.10855			-0.02308			-0.44403			-0.4026
	-0.11399			-0.02425			-0.44064			-0.4051
	-0.11217			-0.02526			-0.44709			-0.40827
	-0.11347			-0.02303			-0.44367			-0.40685
	-0.10914			-0.02243			-0.43351			-0.40516
	-0.11653			-0.02528			-0.44696			-0.41252
	-0.115			-0.02402			-0.44085			-0.41277
	-0.11496			-0.02236			-0.44059			-0.40512
	-0.10939			-0.02583			-0.44622			-0.40732
	-0.1147			-0.02271			-0.44015			-0.40809
	-0.11282			-0.02483			-0.43922			-0.41013
	-0.11532			-0.01592			-0.44388			-0.40873
	-0.11102			-0.01786			-0.44753			-0.40554
	-0.11126			-0.02305			-0.44081			-0.40282
	-0.11055			-0.02142			-0.448			-0.40448
	-0.10961			-0.02951			-0.4395			-0.40905
	-0.11431			-0.02026			-0.4383			-0.40883
	-0.11807			-0.02867			-0.44253			-0.40877
	-0.11814			-0.01785			-0.44246			-0.41151
	-0.11934			-0.02454			-0.44157			-0.40877
	-0.11472			-0.02465			-0.44489			-0.4079
	-0.1138			-0.02411			-0.44611			-0.40841
	-0.11589			-0.02721			-0.44159			-0.40994
	-0.10877			-0.02497			-0.44003			-0.40616
	-0.11234			-0.02648			-0.44325			-0.40789
	-0.11615			-0.02849			-0.44866			-0.41042
	-0.11745			-0.02395			-0.43653			-0.40833
	-0.11563			-0.01773			-0.44045			-0.41235
	-0.11865			-0.02283			-0.44109			-0.4143
	-0.10903			-0.02415			-0.44436			-0.40489
	-0.1123			-0.01706			-0.43981			-0.4103
	-0.11404			-0.02503			-0.44176			-0.40618
	-0.11844			-0.02212			-0.44435			-0.40954
	-0.11158			-0.02652			-0.44182			-0.41308
	-0.11391			-0.02193			-0.44103			-0.40416
	-0.11226			-0.0153			-0.44336			-0.40842
	-0.10967			-0.02426			-0.44244			-0.41109
	-0.10844			-0.02732			-0.4479			-0.41235
	-0.10882			-0.03151			-0.44484			-0.41113
	-0.11446			-0.02164			-0.44142			-0.40705
	-0.11411			-0.02543			-0.44598			-0.41032
	-0.11059			-0.01893			-0.44655			-0.40521
	-0.11401			-0.02358			-0.44504			-0.41594
	-0.11007			-0.02761			-0.44757			-0.408
	-0.11463			-0.01972			-0.44101			-0.40873
	-0.11095			-0.01965			-0.44154			-0.40808
	-0.1142			-0.02554			-0.44274			-0.41059
	-0.11665			-0.01979			-0.44323			-0.40993
	-0.11153			-0.02257			-0.44036			-0.40586
	-0.11593			-0.02022			-0.4514			-0.41173
	-0.10751			-0.02533			-0.43883			-0.40597
	-0.11279			-0.02629			-0.44332			-0.40568
	-0.11221			-0.0289			-0.45172			-0.40796
	-0.11464			-0.02008			-0.43933			-0.40878
	-0.11385			-0.01867			-0.44311			-0.41221
	-0.11305			-0.02475			-0.44435			-0.40706
	-0.11857			-0.02996			-0.44031			-0.39861
	-0.10944			-0.0258			-0.44503			-0.40875
	-0.11474			-0.02541			-0.44741			-0.40978
	-0.11704			-0.03133			-0.44046			-0.40806
	-0.1115			-0.02409			-0.44654			-0.41093
	-0.10749			-0.02467			-0.44297			-0.40715
	-0.10633			-0.02366			-0.43893			-0.41185
	-0.11533			-0.02156			-0.44323			-0.40418
	-0.10978			-0.0209			-0.44723			-0.40601
	-0.10898			-0.02508			-0.44234			-0.40458
	-0.11981			-0.02872			-0.44319			-0.40535
	-0.10904			-0.01922			-0.44578			-0.40917
	-0.10673			-0.02153			-0.43978			-0.40569
	-0.11803			-0.02551			-0.44113			-0.41143
	-0.11249			-0.024			-0.44101			-0.40753
	-0.11357			-0.02874			-0.44398			-0.40386
	-0.11271			-0.02702			-0.44677			-0.41392
	-0.1058			-0.0233			-0.43707			-0.41139
	-0.10873			-0.02485			-0.44195			-0.40111
	-0.1136			-0.02323			-0.44856			-0.40896
	-0.11778			-0.02562			-0.44183			-0.4115
	-0.11454			-0.02232			-0.4451			-0.41289
	-0.11489			-0.02384			-0.44166			-0.41288
	-0.11057			-0.02882			-0.44552			-0.40608
	-0.11116			-0.01907			-0.44387			-0.40547
	-0.11327			-0.02393			-0.44118			-0.40817
	-0.11108			-0.02463			-0.43465			-0.41191
	-0.11408			-0.02333			-0.44335			-0.41338
	-0.11359			-0.02132			-0.4422			-0.40964
	-0.11231			-0.02683			-0.44512			-0.41201
	-0.11373			-0.0256			-0.44117			-0.40846
	-0.1118			-0.02361			-0.4416			-0.41101
	-0.11935			-0.02427			-0.44369			-0.40723
	-0.11274			-0.02446			-0.44005			-0.41267
	-0.11148			-0.01971			-0.44486			-0.40642
	-0.11625			-0.02516			-0.44404			-0.40224
	-0.10842			-0.02885			-0.44008			-0.40675
	-0.11286			-0.02286			-0.43921			-0.40906
	-0.11897			-0.03418			-0.44898			-0.40845
	-0.11588			-0.02524			-0.43962			-0.40783
	-0.11406			-0.0247			-0.43899			-0.41043
	-0.11695			-0.02993			-0.4457			-0.41114
	-0.11287			-0.02843			-0.44177			-0.40955
	-0.1159			-0.02697			-0.439			-0.40864
	-0.11636			-0.02184			-0.44413			-0.40785
	-0.1181			-0.02223			-0.44281			-0.41103
	-0.11294			-0.02033			-0.44862			-0.40739
	-0.11404			-0.03201			-0.44646			-0.40907
	-0.11643			-0.02424			-0.44778			-0.40609
	-0.10806			-0.02244			-0.44014			-0.41097
	-0.11588			-0.02521			-0.44562			-0.41038
	-0.10828			-0.02919			-0.43621			-0.40895
	-0.1097			-0.02473			-0.44251			-0.40967
	-0.11145			-0.03034			-0.43922			-0.40465
	-0.11244			-0.02495			-0.43924			-0.41198
	-0.11623			-0.03042			-0.44062			-0.40745
	-0.11328			-0.02825			-0.44153			-0.40573
	-0.11157			-0.02464			-0.4435			-0.40772
	-0.11638			-0.02345			-0.44492			-0.40684
	-0.11158			-0.02192			-0.44328			-0.40881
	-0.12164			-0.02451			-0.44747			-0.40824
	-0.11427			-0.03206			-0.43975			-0.40949
	-0.11116			-0.02646			-0.44392			-0.4122
	-0.12225			-0.02275			-0.44265			-0.40388
	-0.1108			-0.02678			-0.43941			-0.41313
	-0.11228			-0.02785			-0.44206			-0.41188
	-0.11691			-0.02412			-0.44569			-0.41155
	-0.11827			-0.02525			-0.44437			-0.41403
	-0.11832			-0.02312			-0.44162			-0.40947
	-0.11094			-0.02777			-0.44774			-0.41057
	-0.11788			-0.02391			-0.44385			-0.40932
	-0.11276			-0.01554			-0.44454			-0.41459
	-0.11419			-0.02902			-0.44605			-0.41408
	-0.12011			-0.02584			-0.44517			-0.40754
	-0.11031			-0.02641			-0.44341			-0.40816
	-0.11425			-0.02194			-0.44466			-0.41281
	-0.11842			-0.0214			-0.44543			-0.41364
	-0.1119			-0.02516			-0.44471			-0.41205
	-0.11327			-0.02459			-0.44285			-0.41002
	-0.11471			-0.02888			-0.44613			-0.40619
	-0.10761			-0.02377			-0.44637			-0.40635
	-0.11348			-0.02942			-0.44073			-0.41008
	-0.11669			-0.02678			-0.4414			-0.4096
	-0.11423			-0.02473			-0.44596			-0.41295
	-0.11607			-0.03228			-0.44485			-0.41049
	-0.1177			-0.03123			-0.45014			-0.41447
	-0.11308			-0.0275			-0.44339			-0.41108
	-0.11505			-0.03458			-0.4416			-0.40717
	-0.10878			-0.02798			-0.44363			-0.41385
	-0.11401			-0.02916			-0.44467			-0.4172
	-0.11044			-0.0304			-0.44261			-0.41141
	-0.1096			-0.02208			-0.44765			-0.41325
	-0.11695			-0.03129			-0.44091			-0.40452
	-0.11474			-0.02617			-0.44193			-0.41036
	-0.11392			-0.02264			-0.44419			-0.40824
	-0.11247			-0.02935			-0.44549			-0.41423
	-0.11379			-0.02561			-0.44028			-0.40664
	-0.11503			-0.02748			-0.44354			-0.40882
	-0.11291			-0.02853			-0.44571			-0.40684
	-0.12022			-0.02622			-0.44566			-0.41192
	-0.11496			-0.02355			-0.44456			-0.41123
	-0.11784			-0.0249			-0.44237			-0.40916
	-0.11812			-0.02228			-0.44253			-0.412
	-0.11788			-0.03091			-0.43944			-0.40983
	-0.11431			-0.02524			-0.44032			-0.41289
	-0.11357			-0.02592			-0.44549			-0.41105
	-0.11491			-0.03312			-0.44264			-0.4116
	-0.11386			-0.02939			-0.44467			-0.40923
	-0.11157			-0.02879			-0.44373			-0.40655
	-0.11565			-0.02289			-0.44756			-0.40721
	-0.11499			-0.02799			-0.44462			-0.40967
	-0.11232			-0.01882			-0.44292			-0.40807
	-0.11233			-0.02984			-0.44542			-0.40745
	-0.11602			-0.02627			-0.44096			-0.41036
	-0.11337			-0.02614			-0.44306			-0.41052
	-0.11904			-0.02825			-0.44333			-0.40944
	-0.10863			-0.02479			-0.44301			-0.40727
	-0.10756			-0.02856			-0.44432			-0.40872
	-0.11407			-0.02689			-0.45137			-0.41574
	-0.11208			-0.02709			-0.4455			-0.4102
	-0.11295			-0.02498			-0.44603			-0.40989
	-0.11101			-0.02525			-0.44076			-0.40632
	-0.11075			-0.02327			-0.4396			-0.40695
	-0.11454			-0.02753			-0.44644			-0.40845
	-0.11435			-0.02283			-0.44105			-0.40674
	-0.11518			-0.02981			-0.44653			-0.40471
	-0.11517			-0.02965			-0.44574			-0.41031
	-0.11112			-0.02681			-0.4441			-0.40971
	-0.11581			-0.02354			-0.44955			-0.40882
	-0.11374			-0.03057			-0.44514			-0.4079
	-0.11545			-0.02632			-0.44634			-0.41327
	-0.11767			-0.03041			-0.44414			-0.40587
	-0.1173			-0.02977			-0.45109			-0.40858
	-0.11118			-0.02862			-0.44544			-0.40839
	-0.11206			-0.02235			-0.44323			-0.41131
	-0.11995			-0.02259			-0.44801			-0.40955
	-0.11854			-0.02852			-0.44464			-0.40688
	-0.11415			-0.02722			-0.44195			-0.40772
	-0.11553			-0.0282			-0.44799			-0.41446
	-0.11407			-0.02553			-0.44547			-0.41151
	-0.1112			-0.02791			-0.45046			-0.40288
	-0.11632			-0.02418			-0.44357			-0.41251
	-0.12305			-0.02499			-0.4423			-0.40979
	-0.1159			-0.02392			-0.44402			-0.40723
	-0.11841			-0.03485			-0.44723			-0.41414
	-0.11803			-0.03149			-0.45086			-0.40777
	-0.11707			-0.02186			-0.44597			-0.40939
	-0.11077			-0.02463			-0.44422			-0.41641
	-0.11382			-0.0206			-0.44583			-0.41146
	-0.11049			-0.02615			-0.43893			-0.4158
	-0.11127			-0.02699			-0.4486			-0.40649
	-0.11624			-0.02633			-0.44409			-0.40868
	-0.11864			-0.02603			-0.44249			-0.40664
	-0.10987			-0.02127			-0.4473			-0.41354
	-0.11409			-0.02213			-0.44317			-0.4127
	-0.1171			-0.02822			-0.44352			-0.41408
	-0.11306			-0.02399			-0.44792			-0.4148
	-0.11357			-0.02245			-0.4444			-0.41273
	-0.11504			-0.03108			-0.44615			-0.41014
	-0.11285			-0.02541			-0.44538			-0.4118
	-0.11787			-0.02836			-0.44718			-0.40816
	-0.11224			-0.03089			-0.44448			-0.40921
	-0.11242			-0.02452			-0.44808			-0.4076
	-0.1177			-0.0244			-0.44988			-0.41448
	-0.11483			-0.02581			-0.44904			-0.4113
	-0.11838			-0.02593			-0.44506			-0.41065
	-0.11125			-0.02607			-0.44262			-0.4106
	-0.11188			-0.02739			-0.44521			-0.41513
	-0.11498			-0.02594			-0.44949			-0.40744
	-0.1187			-0.03303			-0.43962			-0.41546
	-0.11952			-0.02824			-0.44294			-0.41019
	-0.11174			-0.02753			-0.44378			-0.41316
	-0.11243			-0.02753			-0.4453			-0.40979
	-0.11333			-0.03377			-0.44843			-0.41311
	-0.11976			-0.0323			-0.44143			-0.40637
	-0.11388			-0.02815			-0.44415			-0.4113
	-0.11928			-0.02438			-0.4496			-0.41452
	-0.10838			-0.02643			-0.44739			-0.40723
	-0.12042			-0.02772			-0.44336			-0.41199
	-0.11562			-0.02886			-0.44551			-0.41315
	-0.11321			-0.02957			-0.45116			-0.41338
	-0.11509			-0.02863			-0.44979			-0.40455
	-0.11291			-0.02425			-0.44547			-0.40639
	-0.11471			-0.02575			-0.44186			-0.41575
	-0.11162			-0.03396			-0.44801			-0.41638
	-0.11407			-0.03457			-0.44003			-0.41423
	-0.11579			-0.02827			-0.44691			-0.41552
	-0.11275			-0.02361			-0.44877			-0.40956
	-0.11628			-0.02503			-0.44867			-0.41098
	-0.11638			-0.02845			-0.4477			-0.40963
	-0.11591			-0.02737			-0.43992			-0.4125
	-0.11932			-0.02972			-0.44601			-0.41199
	-0.11212			-0.03087			-0.4486			-0.41136
	-0.11517			-0.02725			-0.44505			-0.41572
	-0.11575			-0.02858			-0.44677			-0.40817
	-0.11064			-0.02969			-0.43987			-0.41375
	-0.11406			-0.03082			-0.44848			-0.41162
	-0.11195			-0.0244			-0.44377			-0.40782
	-0.11534			-0.02861			-0.44835			-0.41736
	-0.11482			-0.03096			-0.44945			-0.41549
	-0.11591			-0.03124			-0.44775			-0.41252
	-0.11659			-0.02675			-0.44479			-0.41417
	-0.11333			-0.02675			-0.44506			-0.41315
	-0.11715			-0.02381			-0.4459			-0.41202
	-0.1172			-0.02173			-0.45249			-0.41518
	-0.1206			-0.02738			-0.44611			-0.41215
	-0.12052			-0.02871			-0.4472			-0.41782
	-0.11113			-0.02744			-0.44101			-0.4129
	-0.1172			-0.03024			-0.44625			-0.41157
	-0.11359			-0.03037			-0.44432			-0.40791
	-0.11262			-0.025			-0.44637			-0.40397
	-0.11448			-0.02666			-0.44916			-0.40855
	-0.11684			-0.03039			-0.44717			-0.41672
	-0.11294			-0.02733			-0.44651			-0.40752
	-0.11598			-0.02944			-0.44594			-0.4174
	-0.11801			-0.02976			-0.4457			-0.40789
	-0.10971			-0.02914			-0.44394			-0.41112
	-0.11317			-0.03108			-0.44484			-0.41302
	-0.11152			-0.02864			-0.4463			-0.40766
	-0.11652			-0.0339			-0.44913			-0.41432
	-0.1133			-0.02735			-0.44068			-0.40595
	-0.11306			-0.02995			-0.44498			-0.412
	-0.10827			-0.02623			-0.4488			-0.41088
	-0.11829			-0.02985			-0.44503			-0.40804
	-0.10948			-0.02991			-0.44496			-0.41529
	-0.12067			-0.03508			-0.44668			-0.41296
	-0.11717			-0.02564			-0.44351			-0.41193
	-0.11351			-0.03263			-0.44612			-0.41433
	-0.11939			-0.03203			-0.4468			-0.41355
	-0.11316			-0.0252			-0.44684			-0.41299
	-0.11133			-0.02642			-0.45344			-0.40991
	-0.1148			-0.03047			-0.4476			-0.41409
	-0.11344			-0.03182			-0.44569			-0.41414
	-0.11481			-0.02537			-0.44458			-0.41127
	-0.11878			-0.0262			-0.44304			-0.4135
	-0.11197			-0.02506			-0.44693			-0.41353
	-0.1123			-0.02743			-0.44695			-0.40964
	-0.11451			-0.02786			-0.44515			-0.41504
	-0.11322			-0.03418			-0.45036			-0.41096
	-0.11893			-0.02981			-0.44726			-0.41041
	-0.11689			-0.02625			-0.44814			-0.41095
	-0.11745			-0.03457			-0.44838			-0.41853
	-0.11334			-0.03294			-0.44774			-0.41137
	-0.11992			-0.02989			-0.44527			-0.41291
	-0.11226			-0.03093			-0.44703			-0.40808
	-0.11566			-0.03122			-0.44394			-0.41311
	-0.11158			-0.02189			-0.44263			-0.41103
	-0.11623			-0.0307			-0.44098			-0.41535
	-0.11614			-0.02808			-0.44441			-0.41311
	-0.11264			-0.03044			-0.4438			-0.40803
	-0.11309			-0.02958			-0.44219			-0.41635
	-0.11709			-0.02682			-0.45117			-0.41353
	-0.11268			-0.02926			-0.44469			-0.40468
	-0.10856			-0.02895			-0.45096			-0.40899
	-0.11416			-0.02737			-0.44459			-0.41431
	-0.11493			-0.0248			-0.43788			-0.41297
	-0.11748			-0.02319			-0.44442			-0.40749
	-0.11804			-0.0306			-0.44758			-0.40753
	-0.11901			-0.02801			-0.44606			-0.41194
	-0.1167			-0.02744			-0.4485			-0.41426
	-0.1127			-0.02297			-0.44776			-0.41246
	-0.12042			-0.03321			-0.44687			-0.4097
	-0.11589			-0.03209			-0.44516			-0.41216
	-0.11203			-0.0324			-0.44492			-0.4136
	-0.1168			-0.02886			-0.44301			-0.41596
	-0.11027			-0.02833			-0.44409			-0.41071
	-0.11772			-0.02987			-0.44571			-0.41529
	-0.11633			-0.02562			-0.45096			-0.41048
	-0.12016			-0.02997			-0.44817			-0.4098
	-0.1141			-0.02829			-0.44208			-0.41462
	-0.11202			-0.03044			-0.44893			-0.41079
	-0.11657			-0.02919			-0.44652			-0.41688
	-0.11717			-0.02696			-0.44635			-0.41172
	-0.10945			-0.02834			-0.4518			-0.41114
	-0.11481			-0.03162			-0.44874			-0.41196
	-0.11736			-0.03076			-0.44789			-0.40999
	-0.11422			-0.0278			-0.44885			-0.40823
	-0.11529			-0.02663			-0.44585			-0.41386
	-0.11561			-0.02024			-0.44366			-0.41579
	-0.11351			-0.03301			-0.44831			-0.413
	-0.11746			-0.02844			-0.44432			-0.40893
	-0.11604			-0.03181			-0.44454			-0.40956
	-0.11568			-0.02983			-0.44588			-0.40714
	-0.11338			-0.03071			-0.44482			-0.4118
	-0.11479			-0.03248			-0.43989			-0.41551
	-0.1153			-0.03438			-0.4534			-0.41138
	-0.11789			-0.02904			-0.44761			-0.41361
	-0.11387			-0.02856			-0.44432			-0.41224
	-0.12004			-0.03105			-0.4483			-0.41248
	-0.11896			-0.03102			-0.45242			-0.41125
	-0.11694			-0.03542			-0.44939			-0.40769
	-0.11883			-0.02835			-0.44577			-0.41038
	-0.11127			-0.02993			-0.44271			-0.4148
	-0.11797			-0.03399			-0.44353			-0.41135
	-0.11072			-0.03721			-0.44878			-0.41268
	-0.1181			-0.02913			-0.44801			-0.41388
	-0.11846			-0.03005			-0.44039			-0.41345
	-0.11487			-0.02804			-0.44623			-0.41623
	-0.11099			-0.03004			-0.44609			-0.4165
	-0.12048			-0.02792			-0.44752			-0.41119
	-0.11752			-0.03132			-0.44662			-0.41657
	-0.11747			-0.02939			-0.44429			-0.41132
	-0.11391			-0.03322			-0.44353			-0.41197
	-0.11884			-0.02996			-0.44527			-0.41861
	-0.11563			-0.02946			-0.44577			-0.4129
	-0.11343			-0.0319			-0.44657			-0.41004
	-0.12245			-0.03129			-0.45056			-0.41235
	-0.11437			-0.0331			-0.44195			-0.4159
	-0.11663			-0.03129			-0.44828			-0.40867
	-0.12183			-0.03399			-0.44607			-0.40699
	-0.1153			-0.03133			-0.44624			-0.41123
	-0.11901			-0.02815			-0.44666			-0.40973
	-0.12045			-0.0304			-0.45287			-0.41101
	-0.12188			-0.02833			-0.44639			-0.41039
	-0.11667			-0.02975			-0.44629			-0.41372
	-0.11872			-0.02669			-0.44467			-0.40856
	-0.11419			-0.02275			-0.44688			-0.40823
	-0.11663			-0.02945			-0.45131			-0.41044
	-0.11902			-0.0331			-0.44002			-0.41369
	-0.11044			-0.03218			-0.44115			-0.40678
	-0.11354			-0.02957			-0.44609			-0.40963
	-0.11324			-0.0317			-0.44928			-0.41408
	-0.11308			-0.03066			-0.44761			-0.40942
	-0.11659			-0.02636			-0.45176			-0.41133
	-0.11934			-0.02917			-0.44367			-0.4138
	-0.11901			-0.03219			-0.44477			-0.40923
	-0.10932			-0.02816			-0.45409			-0.41192
	-0.11058			-0.02888			-0.44585			-0.41539
	-0.11718			-0.02931			-0.44656			-0.4105
	-0.12342			-0.0305			-0.4471			-0.41513
	-0.11406			-0.03384			-0.4496			-0.40683
	-0.11435			-0.03147			-0.44338			-0.41254
	-0.11847			-0.03107			-0.44474			-0.41601
	-0.11447			-0.02774			-0.44655			-0.4094
	-0.1159			-0.02868			-0.4485			-0.41159
	-0.12115			-0.03054			-0.44425			-0.41187
	-0.11423			-0.03387			-0.44664			-0.41215
	-0.1182			-0.03454			-0.44511			-0.40998
	-0.11182			-0.03059			-0.44459			-0.40927
	-0.11067			-0.03295			-0.44169			-0.41332
	-0.11662			-0.03032			-0.45032			-0.41207
	-0.11527			-0.03497			-0.44862			-0.41085
	-0.11688			-0.02944			-0.44692			-0.41071
	-0.1191			-0.03387			-0.44492			-0.41102
	-0.12278			-0.03025			-0.45146			-0.40257
	-0.11534			-0.03265			-0.44856			-0.41146
	-0.11385			-0.02899			-0.44896			-0.41554
	-0.11261			-0.02918			-0.445			-0.41427
	-0.1201			-0.02761			-0.44617			-0.41425
	-0.11645			-0.02979			-0.44589			-0.4123
	-0.11646			-0.03056			-0.44726			-0.41875
	-0.11115			-0.03597			-0.44788			-0.41106
	-0.11592			-0.03196			-0.4468			-0.40823
	-0.11457			-0.03315			-0.4506			-0.41068
	-0.11581			-0.03319			-0.44664			-0.41272
	-0.11399			-0.04042			-0.4441			-0.41275
	-0.11519			-0.029			-0.4439			-0.41124
	-0.11495			-0.03425			-0.45015			-0.40893
	-0.11173			-0.02998			-0.45382			-0.41088
	-0.11457			-0.03265			-0.44846			-0.40589
	-0.11206			-0.03406			-0.44318			-0.40851
	-0.11659			-0.0293			-0.44337			-0.41493
	-0.11789			-0.03509			-0.44829			-0.41271
	-0.11274			-0.02762			-0.45205			-0.41212
	-0.11474			-0.02538			-0.44767			-0.40788
	-0.11938			-0.02969			-0.44386			-0.41162
	-0.11699			-0.03063			-0.44779			-0.41499
	-0.12366			-0.02525			-0.44804			-0.41346
	-0.11288			-0.03165			-0.44314			-0.41957
	-0.11842			-0.03249			-0.44986			-0.41708
	-0.11919			-0.03151			-0.44674			-0.41024
	-0.11879			-0.03313			-0.44347			-0.41507
	-0.1207			-0.03403			-0.44621			-0.41454
	-0.11814			-0.03389			-0.45087			-0.41645
	-0.11509			-0.03503			-0.45022			-0.41286
	-0.11044			-0.02915			-0.44512			-0.41628
	-0.11608			-0.03528			-0.44887			-0.41446
	-0.11904			-0.03615			-0.4474			-0.40895
	-0.11565			-0.03298			-0.44437			-0.41219
	-0.11903			-0.03928			-0.44361			-0.41171
	-0.11632			-0.03202			-0.44896			-0.41262
	-0.1162			-0.03621			-0.44955			-0.41562
	-0.1191			-0.03018			-0.45015			-0.40914
	-0.11871			-0.03742			-0.44874			-0.41353
	-0.11734			-0.0336			-0.44488			-0.41477
	-0.1132			-0.02656			-0.44829			-0.41741
	-0.11184			-0.02129			-0.45369			-0.41082
	-0.11527			-0.02892			-0.44552			-0.41555
	-0.11412			-0.03425			-0.44996			-0.40619
	-0.11436			-0.03326			-0.44777			-0.41416
	-0.11989			-0.03475			-0.44488			-0.41348
	-0.11446			-0.03814			-0.44347			-0.41139
	-0.11491			-0.03465			-0.45035			-0.41534
	-0.11725			-0.03085			-0.44821			-0.41166
	-0.12227			-0.02943			-0.44945			-0.41224
	-0.11669			-0.03183			-0.44842			-0.41277
	-0.11251			-0.0326			-0.4458			-0.41428
	-0.12364			-0.03568			-0.44733			-0.41232
	-0.11289			-0.03196			-0.44894			-0.4171
	-0.11308			-0.03745			-0.45047			-0.41605
	-0.11053			-0.03387			-0.45136			-0.41566
	-0.11259			-0.0333			-0.45068			-0.4117
	-0.12111			-0.03371			-0.44465			-0.41333
	-0.11902			-0.02873			-0.44534			-0.40671
	-0.11942			-0.03304			-0.45122			-0.41138
	-0.10878			-0.02975			-0.44866			-0.40911
	-0.1143			-0.03321			-0.45114			-0.41473
	-0.11787			-0.03272			-0.45299			-0.40716
	-0.1203			-0.03321			-0.45426			-0.41529
	-0.11604			-0.02833			-0.45235			-0.41165
	-0.12172			-0.03352			-0.45025			-0.41621
	-0.11341			-0.03203			-0.449			-0.41788
	-0.11824			-0.02848			-0.44646			-0.41386
	-0.11335			-0.03332			-0.44929			-0.41748
	-0.11524			-0.03392			-0.44657			-0.41441
	-0.11252			-0.03059			-0.44922			-0.40761
	-0.11704			-0.02945			-0.4475			-0.41266
	-0.12098			-0.03455			-0.44972			-0.4128
	-0.1145			-0.03178			-0.45075			-0.40855
	-0.11272			-0.03289			-0.44171			-0.42074
	-0.11847			-0.03696			-0.44817			-0.41828
	-0.11299			-0.03484			-0.44802			-0.41357
	-0.1187			-0.03822			-0.44795			-0.41405
	-0.11532			-0.03397			-0.44895			-0.41388
	-0.11683			-0.03547			-0.45134			-0.41401
	-0.11821			-0.02858			-0.44416			-0.4133
	-0.11422			-0.03331			-0.44914			-0.41289
	-0.12066			-0.03308			-0.44661			-0.41316
	-0.11602			-0.03344			-0.44871			-0.41032
	-0.11493			-0.03296			-0.45516			-0.41165
	-0.12214			-0.03695			-0.45067			-0.41
	-0.11945			-0.03426			-0.4503			-0.41265
	-0.12242			-0.03005			-0.44792			-0.40979
	-0.11517			-0.03412			-0.45057			-0.41211
	-0.11546			-0.03184			-0.44832			-0.40925
	-0.1221			-0.02779			-0.44823			-0.41404
	-0.10968			-0.03249			-0.45191			-0.41025
	-0.1209			-0.03539			-0.45494			-0.41141
	-0.11975			-0.03098			-0.44399			-0.40913
	-0.11043			-0.03222			-0.44788			-0.42067
	-0.11534			-0.0294			-0.45248			-0.41263
	-0.11827			-0.03065			-0.4488			-0.41658
	-0.11681			-0.03281			-0.44743			-0.40926
	-0.1145			-0.03682			-0.44392			-0.41181
	-0.11658			-0.03468			-0.44858			-0.41363
	-0.12083			-0.03225			-0.4509			-0.40788
	-0.11969			-0.03265			-0.45118			-0.41274
	-0.11976			-0.0315			-0.44864			-0.4105
	-0.11345			-0.03537			-0.44348			-0.40979
	-0.10781			-0.03232			-0.44984			-0.4113
	-0.11795			-0.03557			-0.44864			-0.41654
	-0.11214			-0.037			-0.45026			-0.41522
	-0.11954			-0.03255			-0.44588			-0.41144
	-0.11663			-0.0322			-0.44933			-0.41733
	-0.11557			-0.03373			-0.44663			-0.41398
	-0.11345			-0.03795			-0.44624			-0.41585
	-0.1121			-0.03146			-0.44849			-0.40928
	-0.11651			-0.03894			-0.45132			-0.41823
	-0.11729			-0.03271			-0.44068			-0.41538
	-0.11339			-0.03766			-0.44655			-0.41681
	-0.11668			-0.03565			-0.45171			-0.41398
	-0.11645			-0.04048			-0.45049			-0.41301
	-0.11278			-0.03201			-0.44439			-0.41172
	-0.11501			-0.03598			-0.44936			-0.41328
	-0.1211			-0.03481			-0.44578			-0.41876
	-0.11672			-0.03204			-0.44797			-0.41579
	-0.11925			-0.03332			-0.45244			-0.41198
	-0.11948			-0.03579			-0.44862			-0.40979
	-0.11446			-0.03943			-0.44998			-0.41316
	-0.12106			-0.0341			-0.44927			-0.41247
	-0.11554			-0.03453			-0.44765			-0.41238
	-0.11273			-0.03484			-0.45291			-0.41222
	-0.11963			-0.03296			-0.45679			-0.40971
	-0.11373			-0.03781			-0.44502			-0.40996
	-0.11619			-0.02943			-0.45212			-0.41256
	-0.11366			-0.03057			-0.45594			-0.41075
	-0.11205			-0.03506			-0.45168			-0.41387
	-0.11406			-0.03193			-0.45123			-0.41672
	-0.12115			-0.03115			-0.4499			-0.41401
	-0.12041			-0.03531			-0.45035			-0.41349
	-0.12048			-0.03702			-0.45511			-0.41182
	-0.11247			-0.03119			-0.44581			-0.41328
	-0.11503			-0.0353			-0.45074			-0.41587
	-0.11394			-0.03907			-0.45416			-0.41352
	-0.11756			-0.03351			-0.44853			-0.41302
	-0.11791			-0.03543			-0.44819			-0.41443
	-0.11524			-0.03537			-0.44557			-0.41327
	-0.1183			-0.03328			-0.4499			-0.41764
	-0.1177			-0.03416			-0.45182			-0.4124
	-0.11693			-0.03415			-0.44952			-0.41351
	-0.11666			-0.03255			-0.45069			-0.41337
	-0.11968			-0.03866			-0.45038			-0.40941
	-0.12215			-0.03309			-0.44853			-0.41623
	-0.117			-0.03758			-0.45073			-0.41715
	-0.11684			-0.03329			-0.44591			-0.40935
	-0.12023			-0.03424			-0.44767			-0.41222
	-0.11542			-0.03528			-0.44698			-0.41444
	-0.11376			-0.03141			-0.45183			-0.41129
	-0.11531			-0.03794			-0.44895			-0.41741
	-0.12055			-0.03905			-0.44958			-0.41431
	-0.12015			-0.0352			-0.45098			-0.41404
	-0.11717			-0.03414			-0.44894			-0.41537
	-0.1223			-0.03489			-0.44772			-0.41742
	-0.1212			-0.03554			-0.44975			-0.41613
	-0.12162			-0.03458			-0.44685			-0.41815
	-0.11639			-0.0445			-0.44881			-0.40879
	-0.11524			-0.03839			-0.44959			-0.41047
	-0.11438			-0.03395			-0.45118			-0.41013
	-0.11608			-0.04108			-0.44833			-0.41572
	-0.11996			-0.03375			-0.44511			-0.41508
	-0.11727			-0.0397			-0.44571			-0.41204
	-0.1133			-0.03764			-0.44579			-0.40889
	-0.12281			-0.03535			-0.44663			-0.41075
	-0.11788			-0.03319			-0.44779			-0.41389
	-0.11995			-0.03784			-0.44692			-0.416
	-0.12261			-0.03707			-0.44991			-0.41116
	-0.12114			-0.03546			-0.44782			-0.41328
	-0.11675			-0.04088			-0.45088			-0.40848
	-0.11102			-0.03451			-0.45251			-0.41797
	-0.11677			-0.03469			-0.44437			-0.40774
	-0.11877			-0.03333			-0.45519			-0.41133
	-0.11918			-0.03171			-0.44366			-0.41365
	-0.11645			-0.03089			-0.4462			-0.41517
	-0.11853			-0.03417			-0.45271			-0.41515
	-0.12273			-0.03381			-0.44725			-0.41328
	-0.11902			-0.03275			-0.45323			-0.41389
	-0.11976			-0.03961			-0.44852			-0.41609
	-0.11563			-0.03451			-0.45231			-0.41774
	-0.11581			-0.03268			-0.4533			-0.41218
	-0.12521			-0.03819			-0.44799			-0.41758
	-0.11811			-0.03617			-0.45162			-0.41371
	-0.11603			-0.03438			-0.44697			-0.41876
	-0.11931			-0.03613			-0.44913			-0.4093
	-0.11025			-0.03335			-0.44391			-0.41968
	-0.12217			-0.03738			-0.44952			-0.41369
	-0.11671			-0.03581			-0.44707			-0.41136
	-0.1191			-0.03743			-0.44755			-0.41437
	-0.11755			-0.03684			-0.44755			-0.41027
	-0.11678			-0.03466			-0.45111			-0.41337
	-0.11297			-0.03866			-0.44832			-0.41419
	-0.11801			-0.03601			-0.4463			-0.41463
	-0.11832			-0.03547			-0.44604			-0.41778
	-0.11428			-0.03964			-0.45236			-0.41399
	-0.11793			-0.03622			-0.4539			-0.41383
	-0.12151			-0.03411			-0.45094			-0.41437
	-0.11577			-0.03074			-0.44453			-0.41158
	-0.11819			-0.03842			-0.45213			-0.41347
	-0.11788			-0.03218			-0.4483			-0.40452
	-0.11723			-0.03724			-0.44594			-0.41106
	-0.12024			-0.03244			-0.4483			-0.41293
	-0.11714			-0.03591			-0.44601			-0.41879
	-0.12701			-0.04008			-0.45019			-0.40971
	-0.1183			-0.03974			-0.4428			-0.40617
	-0.12073			-0.03919			-0.45323			-0.41216
	-0.1165			-0.03968			-0.45614			-0.41535
	-0.11337			-0.03702			-0.44843			-0.4142
	-0.12071			-0.03933			-0.45475			-0.41917
	-0.12083			-0.03509			-0.44815			-0.41532
	-0.11741			-0.03791			-0.453			-0.41304
	-0.12122			-0.03825			-0.45123			-0.40717
	-0.1141			-0.0397			-0.44556			-0.41276
	-0.11781			-0.03694			-0.45071			-0.41383
	-0.11919			-0.03178			-0.45096			-0.41211
	-0.11703			-0.03788			-0.44898			-0.41165
	-0.11886			-0.03758			-0.44452			-0.41001
	-0.11786			-0.03668			-0.44668			-0.4138
	-0.11712			-0.03628			-0.44882			-0.41321
	-0.11696			-0.03799			-0.45043			-0.41887
	-0.12407			-0.03134			-0.45313			-0.41329
	-0.11829			-0.03846			-0.45352			-0.41853
	-0.12454			-0.04184			-0.4461			-0.41994
	-0.11905			-0.03026			-0.45008			-0.41468
	-0.11974			-0.03103			-0.44515			-0.41734
	-0.11699			-0.0343			-0.4514			-0.41768
	-0.11822			-0.0344			-0.45199			-0.41252
	-0.11766			-0.03572			-0.45098			-0.41479
	-0.11752			-0.03672			-0.4497			-0.41429
	-0.1135			-0.03399			-0.44846			-0.41314
	-0.11759			-0.03794			-0.44938			-0.41323
	-0.11488			-0.03722			-0.4506			-0.41892
	-0.11803			-0.0316			-0.45025			-0.41873
	-0.12252			-0.03283			-0.44878			-0.41981
	-0.11873			-0.04285			-0.44553			-0.40912
	-0.11808			-0.03475			-0.45112			-0.41374
	-0.11581			-0.03817			-0.44435			-0.4159
	-0.11705			-0.03635			-0.45459			-0.41301
	-0.119			-0.03931			-0.4494			-0.41216
	-0.11669			-0.03243			-0.44447			-0.41433
	-0.11641			-0.03704			-0.44808			-0.41492
	-0.12413			-0.03749			-0.4517			-0.41715
	-0.12117			-0.04029			-0.44598			-0.4134
	-0.11554			-0.03764			-0.45384			-0.41793
	-0.12589			-0.04005			-0.44544			-0.41931
	-0.11963			-0.03357			-0.44818			-0.41164
	-0.11311			-0.03542			-0.44534			-0.41107
	-0.11983			-0.03463			-0.44972			-0.4134
	-0.118			-0.03724			-0.448			-0.41496
	-0.12164			-0.03993			-0.44639			-0.41441
	-0.12074			-0.03027			-0.44677			-0.4191
	-0.12099			-0.03515			-0.45341			-0.41221
	-0.11644			-0.03762			-0.44697			-0.41413
	-0.12018			-0.03548			-0.44822			-0.419
	-0.1182			-0.03548			-0.44918			-0.41553
	-0.11816			-0.04318			-0.44737			-0.41343
	-0.11726			-0.03185			-0.44483			-0.41452
	-0.11646			-0.03735			-0.45333			-0.41322
	-0.1204			-0.03137			-0.44999			-0.41898
	-0.12055			-0.03466			-0.45461			-0.41778
	-0.1169			-0.0336			-0.44857			-0.41489
	-0.11087			-0.03656			-0.45184			-0.41509
	-0.12155			-0.03021			-0.44882			-0.4131
	-0.1159			-0.03843			-0.4448			-0.413
	-0.11739			-0.03934			-0.45393			-0.41581
	-0.11879			-0.03123			-0.45222			-0.4176
	-0.11971			-0.03675			-0.45222			-0.40371
	-0.11289			-0.04749			-0.45172			-0.41609
	-0.11552			-0.03993			-0.4544			-0.41217
	-0.1202			-0.03648			-0.45063			-0.41808
	-0.11839			-0.03786			-0.45306			-0.41036
	-0.12268			-0.03358			-0.45654			-0.41204
	-0.11623			-0.03663			-0.45041			-0.42143
	-0.11869			-0.0397			-0.44927			-0.41697
	-0.12466			-0.03871			-0.45008			-0.41533
	-0.12076			-0.03797			-0.4478			-0.41207
	-0.11895			-0.04032			-0.45119			-0.41036
	-0.11545			-0.03165			-0.44756			-0.4132
	-0.1145			-0.03706			-0.45097			-0.41674
	-0.11493			-0.03606			-0.44389			-0.41443
	-0.11451			-0.04361			-0.44538			-0.41377
	-0.11828			-0.0359			-0.45053			-0.4168
	-0.11577			-0.0355			-0.45226			-0.42102
	-0.12184			-0.03188			-0.45034			-0.41451
	-0.12032			-0.04147			-0.45323			-0.41705
	-0.12008			-0.03919			-0.44939			-0.41215
	-0.11807			-0.0396			-0.44898			-0.4158
	-0.11923			-0.0411			-0.45031			-0.40871
	-0.12093			-0.03984			-0.44591			-0.4172
	-0.11613			-0.03706			-0.44941			-0.41499
	-0.12108			-0.03839			-0.44639			-0.4158
	-0.11885			-0.03441			-0.44649			-0.41584
	-0.11416			-0.04259			-0.44724			-0.41606
	-0.12105			-0.0347			-0.45058			-0.41
	-0.11094			-0.03525			-0.44964			-0.40828
	-0.12558			-0.03401			-0.45185			-0.4194
	-0.11902			-0.03777			-0.45416			-0.41665
	-0.11981			-0.03387			-0.45651			-0.41119
	-0.11617			-0.03667			-0.44868			-0.4121
	-0.11834			-0.0342			-0.45186			-0.40732
	-0.11691			-0.04197			-0.44742			-0.41019
	-0.11935			-0.03506			-0.45421			-0.40943
	-0.11937			-0.03632			-0.44789			-0.41406
	-0.12182			-0.03555			-0.45613			-0.41441
	-0.11669			-0.04287			-0.452			-0.41884
	-0.11942			-0.03358			-0.45313			-0.41375
	-0.12066			-0.03775			-0.44554			-0.41343
	-0.12199			-0.03682			-0.45245			-0.40962
	-0.11659			-0.03529			-0.45329			-0.4172
	-0.11682			-0.03931			-0.45519			-0.41339
	-0.12246			-0.04035			-0.44775			-0.41656
	-0.11904			-0.04071			-0.45274			-0.41277
	-0.12391			-0.03772			-0.45158			-0.41979
	-0.11665			-0.0345			-0.44341			-0.41125
	-0.11452			-0.03402			-0.44513			-0.41375
	-0.11693			-0.0354			-0.45781			-0.41525
	-0.11912			-0.03861			-0.4533			-0.41221
	-0.11774			-0.03464			-0.4483			-0.40855
	-0.1154			-0.03614			-0.45271			-0.41668
	-0.12029			-0.03858			-0.45259			-0.41502
	-0.12017			-0.04189			-0.44408			-0.40792
	-0.12361			-0.03955			-0.45137			-0.4182
	-0.11723			-0.0388			-0.45023			-0.41303
	-0.11107			-0.03461			-0.45104			-0.41893
	-0.12182			-0.03484			-0.45115			-0.41669
	-0.11834			-0.03959			-0.45048			-0.41563
	-0.1191			-0.03628			-0.44986			-0.41121
	-0.11669			-0.03396			-0.45023			-0.41625
	-0.11607			-0.03946			-0.45104			-0.41888
	-0.12353			-0.04509			-0.44755			-0.41601
	-0.11584			-0.04015			-0.44736			-0.41649
	-0.11793			-0.04119			-0.45262			-0.41787
	-0.12278			-0.03857			-0.44566			-0.41478
	-0.12074			-0.03869			-0.44987			-0.41389
	-0.11462			-0.03564			-0.45045			-0.41146
	-0.1172			-0.03444			-0.45001			-0.41715
	-0.12028			-0.03639			-0.4498			-0.41545
	-0.12037			-0.03858			-0.45621			-0.41704
	-0.11521			-0.04019			-0.4544			-0.41031
	-0.12136			-0.03659			-0.45314			-0.41762
	-0.1163			-0.03797			-0.44916			-0.41858
	-0.12132			-0.03458			-0.45046			-0.41469
	-0.11711			-0.04086			-0.45126			-0.41634
	-0.12024			-0.0367			-0.45191			-0.41573
	-0.12086			-0.0441			-0.45006			-0.41268
	-0.11717			-0.04171			-0.44819			-0.41486
	-0.11671			-0.03817			-0.44973			-0.41245
	-0.11317			-0.04354			-0.44744			-0.41136
	-0.12144			-0.03909			-0.45092			-0.41641
	-0.11998			-0.04709			-0.45082			-0.41238
	-0.11769			-0.04449			-0.45554			-0.41161
	-0.11603			-0.04339			-0.45355			-0.41582
	-0.12079			-0.04149			-0.45141			-0.42029
	-0.11912			-0.03966			-0.45199			-0.41587
	-0.12195			-0.04346			-0.44973			-0.41611
	-0.11501			-0.03586			-0.45215			-0.41654
	-0.12194			-0.04318			-0.44635			-0.417
	-0.1194			-0.04644			-0.44974			-0.41366
	-0.12224			-0.04064			-0.45238			-0.41423
	-0.12264			-0.03814			-0.45162			-0.41993
	-0.12131			-0.04054			-0.44946			-0.41877
	-0.11984			-0.04006			-0.44818			-0.41153
	-0.12267			-0.03574			-0.45275			-0.41312
	-0.12324			-0.04313			-0.44953			-0.41431
	-0.11604			-0.03623			-0.45348			-0.41437
	-0.12			-0.04176			-0.45025			-0.41957
	-0.11842			-0.04119			-0.44656			-0.41206
	-0.11831			-0.04175			-0.45362			-0.42045
	-0.12236			-0.03877			-0.45179			-0.41176
	-0.11797			-0.03892			-0.45498			-0.41233
	-0.12547			-0.0383			-0.44992			-0.41498
	-0.11647			-0.04091			-0.44593			-0.41811
	-0.11458			-0.03829			-0.45212			-0.41864
	-0.11419			-0.03999			-0.45408			-0.41128
	-0.11468			-0.03246			-0.45366			-0.41775
	-0.12068			-0.03994			-0.44949			-0.41324
	-0.11705			-0.03886			-0.45198			-0.41279
	-0.1171			-0.04111			-0.44908			-0.4129
	-0.1213			-0.03832			-0.45247			-0.41265
	-0.1188			-0.04266			-0.4495			-0.41544
	-0.12084			-0.03842			-0.45423			-0.4153
	-0.11224			-0.03981			-0.45328			-0.41747
	-0.12256			-0.03811			-0.44848			-0.41449
	-0.1226			-0.03692			-0.45335			-0.41511
	-0.12149			-0.04994			-0.45138			-0.41685
	-0.12386			-0.03665			-0.45079			-0.41664
	-0.11567			-0.04056			-0.44955			-0.41122
	-0.11829			-0.04354			-0.45239			-0.41692
	-0.11513			-0.04368			-0.44919			-0.4196
	-0.11811			-0.03937			-0.44922			-0.41224
	-0.11835			-0.04325			-0.45319			-0.4182
	-0.1213			-0.03919			-0.45078			-0.41365
	-0.11734			-0.03856			-0.4558			-0.42031
	-0.11461			-0.04047			-0.45413			-0.41634
	-0.12056			-0.04481			-0.45589			-0.41644
	-0.12193			-0.04029			-0.44838			-0.41752
	-0.11723			-0.04471			-0.44962			-0.41383
	-0.11945			-0.04222			-0.45215			-0.42028
	-0.12392			-0.04084			-0.44992			-0.41574
	-0.1213			-0.04046			-0.44584			-0.41644
	-0.11807			-0.03998			-0.453			-0.41208
	-0.12546			-0.0412			-0.45319			-0.41706
	-0.12572			-0.04154			-0.44617			-0.41655
	-0.12143			-0.04707			-0.45244			-0.41019
	-0.12119			-0.04372			-0.44907			-0.41455
	-0.12046			-0.04227			-0.45129			-0.4139
	-0.12166			-0.04355			-0.45298			-0.42213
	-0.11658			-0.04031			-0.45036			-0.41434
	-0.12255			-0.04053			-0.44892			-0.41459
	-0.12051			-0.0429			-0.44572			-0.41858
	-0.12105			-0.03651			-0.446			-0.41645
	-0.1215			-0.03973			-0.44893			-0.41746
	-0.12388			-0.03328			-0.44944			-0.40804
	-0.12578			-0.04337			-0.44894			-0.41571
	-0.12099			-0.04376			-0.4517			-0.41471
	-0.12057			-0.03443			-0.45152			-0.41445
	-0.11609			-0.04422			-0.45418			-0.41027
	-0.12141			-0.04472			-0.4489			-0.41474
	-0.11696			-0.04091			-0.45008			-0.41572
	-0.12054			-0.04098			-0.45564			-0.41638
	-0.1212			-0.04265			-0.45384			-0.40905
	-0.11881			-0.03485			-0.44992			-0.415
	-0.12355			-0.04326			-0.45341			-0.41984
	-0.11848			-0.04496			-0.4482			-0.41723
	-0.11726			-0.03906			-0.44674			-0.41593
	-0.12049			-0.04085			-0.44751			-0.41416
	-0.11418			-0.04404			-0.44689			-0.40984
	-0.11398			-0.03836			-0.44409			-0.41432
	-0.1213			-0.04697			-0.45168			-0.41839
	-0.11945			-0.04342			-0.45182			-0.41308
	-0.12113			-0.04395			-0.4502			-0.41862
	-0.12169			-0.0418			-0.45365			-0.41198
	-0.12296			-0.04825			-0.45233			-0.41218
	-0.12149			-0.03693			-0.45248			-0.417
	-0.12179			-0.04084			-0.44873			-0.41831
	-0.12013			-0.04805			-0.45636			-0.41952
	-0.12273			-0.04754			-0.44825			-0.41995
	-0.11569			-0.03699			-0.45113			-0.42044
	-0.11912			-0.04372			-0.45055			-0.41787
	-0.11916			-0.04008			-0.45193			-0.41584
	-0.12012			-0.04254			-0.44757			-0.41395
	-0.11956			-0.03741			-0.44981			-0.41744
	-0.12192			-0.04791			-0.45006			-0.41812
	-0.11918			-0.0407			-0.45169			-0.41727
	-0.11847			-0.0422			-0.44717			-0.41712
	-0.11664			-0.04231			-0.44623			-0.4159
	-0.12244			-0.04379			-0.45194			-0.41893
	-0.12315			-0.04037			-0.45047			-0.4148
	-0.12153			-0.0424			-0.45237			-0.41024
	-0.11747			-0.04251			-0.45364			-0.41833
	-0.12084			-0.0318			-0.44708			-0.41218
	-0.12385			-0.04528			-0.44808			-0.4186
	-0.12311			-0.03747			-0.45127			-0.41557
	-0.12571			-0.03915			-0.45443			-0.41486
	-0.12077			-0.04414			-0.45543			-0.41793
	-0.11641			-0.03904			-0.44935			-0.41284
	-0.11879			-0.04238			-0.44933			-0.41404
	-0.11237			-0.03932			-0.45184			-0.41549
	-0.11923			-0.04113			-0.44781			-0.41815
	-0.1224			-0.04025			-0.45024			-0.41925
	-0.12178			-0.0439			-0.44907			-0.41833
	-0.12403			-0.04648			-0.44998			-0.4129
	-0.12002			-0.0424			-0.4556			-0.41818
	-0.11287			-0.04171			-0.4493			-0.41793
	-0.11904			-0.04472			-0.45255			-0.41317
	-0.11787			-0.03252			-0.45209			-0.41539
	-0.11914			-0.03748			-0.4545			-0.42128
	-0.12227			-0.04624			-0.45083			-0.41586
	-0.11722			-0.04237			-0.4523			-0.41423
	-0.12322			-0.04054			-0.45293			-0.41632
	-0.12688			-0.04023			-0.45242			-0.41569
	-0.1215			-0.04414			-0.4488			-0.41273
	-0.11927			-0.04062			-0.45067			-0.41548
	-0.12362			-0.04755			-0.44879			-0.41753
	-0.12029			-0.04293			-0.45133			-0.41626
	-0.11876			-0.05104			-0.45496			-0.41723
	-0.12035			-0.04293			-0.45015			-0.41324
	-0.12001			-0.04145			-0.45221			-0.41667
	-0.11571			-0.0412			-0.44903			-0.41773
	-0.12572			-0.04134			-0.44907			-0.41981
	-0.11797			-0.04092			-0.45054			-0.42568
	-0.11955			-0.04059			-0.4549			-0.41429
	-0.12234			-0.04361			-0.4498			-0.41198
	-0.12264			-0.04859			-0.44807			-0.41816
	-0.12115			-0.04314			-0.4537			-0.41513
	-0.11877			-0.04223			-0.44918			-0.41099
	-0.11793			-0.03561			-0.4507			-0.41554
	-0.12275			-0.04287			-0.45539			-0.41463
	-0.11573			-0.0398			-0.45349			-0.41599
	-0.11886			-0.04603			-0.45078			-0.41705
	-0.12007			-0.04092			-0.44982			-0.41317
	-0.12315			-0.04006			-0.45654			-0.41795
	-0.11954			-0.04341			-0.44676			-0.41438
	-0.12703			-0.04036			-0.45021			-0.41571
	-0.12044			-0.04063			-0.45304			-0.41348
	-0.11961			-0.03907			-0.45092			-0.41397
	-0.11583			-0.04591			-0.4581			-0.41707
	-0.12029			-0.04876			-0.45283			-0.4211
	-0.11524			-0.04357			-0.44962			-0.42153
	-0.12157			-0.03908			-0.45465			-0.41474
	-0.1195			-0.04002			-0.4519			-0.41672
	-0.11984			-0.05154			-0.44972			-0.41401
	-0.12169			-0.04425			-0.44743			-0.41283
	-0.11306			-0.04005			-0.44988			-0.41871
	-0.12029			-0.04356			-0.45031			-0.41727
	-0.12265			-0.04518			-0.45784			-0.41994
	-0.11792			-0.04043			-0.45452			-0.4188
	-0.12207			-0.03542			-0.45052			-0.41796
	-0.12671			-0.04274			-0.44771			-0.41827
	-0.11943			-0.04043			-0.45052			-0.41363
	-0.12162			-0.04763			-0.44905			-0.41937
	-0.12296			-0.0418			-0.4533			-0.41112
	-0.11807			-0.04586			-0.45616			-0.42102
	-0.12369			-0.04386			-0.45216			-0.41637
	-0.12056			-0.0424			-0.45835			-0.41851
	-0.12335			-0.04117			-0.44949			-0.41641
	-0.12343			-0.03688			-0.45028			-0.41361
	-0.1215			-0.04005			-0.45122			-0.41869
	-0.12431			-0.04715			-0.44935			-0.41681
	-0.12301			-0.04025			-0.45353			-0.41714
	-0.1207			-0.04368			-0.45282			-0.41417
	-0.11496			-0.04008			-0.44945			-0.42218
	-0.12221			-0.04382			-0.44978			-0.41593
	-0.12249			-0.04486			-0.4618			-0.42004
	-0.11877			-0.04589			-0.4493			-0.4164
	-0.12597			-0.04764			-0.45714			-0.41335
	-0.11638			-0.04642			-0.45312			-0.41966
	-0.11978			-0.04615			-0.45031			-0.41239
	-0.11936			-0.03919			-0.45206			-0.41569
	-0.11861			-0.04084			-0.44605			-0.42038
	-0.12255			-0.04905			-0.45101			-0.41269
	-0.11916			-0.04039			-0.451			-0.41503
	-0.11757			-0.0428			-0.45399			-0.41471
	-0.12424			-0.04146			-0.4473			-0.41601
	-0.12192			-0.04221			-0.45439			-0.41383
	-0.12403			-0.04451			-0.45332			-0.4143
	-0.1235			-0.04393			-0.45094			-0.41405
	-0.12158			-0.04507			-0.4519			-0.41605
	-0.11993			-0.04242			-0.44803			-0.41959
	-0.12306			-0.04339			-0.4473			-0.41798
	-0.12198			-0.04591			-0.45027			-0.41566
	-0.1204			-0.04188			-0.45076			-0.4194
	-0.12448			-0.04122			-0.45496			-0.41653
	-0.12186			-0.04905			-0.44767			-0.41557
	-0.11724			-0.03951			-0.45646			-0.41727
	-0.12237			-0.03974			-0.45053			-0.41541
	-0.12381			-0.05122			-0.44736			-0.41006
	-0.12871			-0.04573			-0.44937			-0.41488
	-0.12242			-0.04746			-0.448			-0.42142
	-0.12818			-0.04478			-0.45558			-0.41917
	-0.11925			-0.04529			-0.45187			-0.41533
	-0.1215			-0.03876			-0.45611			-0.41236
	-0.1245			-0.04179			-0.4547			-0.41538
	-0.12461			-0.04713			-0.44949			-0.41296
	-0.11854			-0.04831			-0.45188			-0.41412
	-0.11931			-0.04338			-0.45271			-0.41661
	-0.12331			-0.04512			-0.45175			-0.41589
	-0.11767			-0.04622			-0.45277			-0.4186
	-0.12293			-0.04004			-0.45264			-0.42061
	-0.11648			-0.04726			-0.45289			-0.41483
	-0.12622			-0.04012			-0.45228			-0.41627
	-0.11787			-0.03689			-0.4506			-0.41921
	-0.12147			-0.04592			-0.45146			-0.41756
	-0.11838			-0.0456			-0.45448			-0.42237
	-0.12263			-0.04388			-0.45312			-0.41399
	-0.12184			-0.04778			-0.44952			-0.41863
	-0.12219			-0.0397			-0.45435			-0.41635
	-0.1202			-0.04555			-0.45124			-0.41445
	-0.11999			-0.04637			-0.4508			-0.42005
[truncated: 981 more rows]
