# Supplementary material for: Early steps of protein disaggregation by Hsp70 chaperone and class B J-domain proteins are shaped by Hsp110
Source: eLife. 2024 Oct 15;13:RP94795. doi: 10.7554/eLife.94795 (PMC11479587; doi:10.7554/eLife.94795)
Supplement: Figure 2—source data 2. [file elife-94795-fig2-data2.xlsx]

## Sheet: Fig 2B
	Ssa1, Sis1						AVG			SD				Ssa1, Sis1, Sse1						AVG			SD
	LARGE >2uM			SMALL <2uM				LARGE	SMALL					LARGE >2uM			SMALL <2uM				LARGE	SMALL
	1	2	3	1	2	3		25.7882	74.2118		6.68936	6.68936		1	2	3	1	2	3		12.5085	87.4915		1.44009	1.44009
1	6	28	14	18	24	35							1	5	9	2	30	96	78
2	7	15	9	26	46	41							2	5	16	10	25	60	80
3	6	14	13	25	28	55							3	2	12	8	26	106	75
4	4	13	10	21	33	45							4	3	10	10	15	64	48
5	7	13	11	6	36	30							5	2	13	10	36	58	75
6	9	17	9	20	31	40							6	3	16	6	27	96	88
7	5	20	7	33	22	32							7	4	20	10	23	114	84
8	10	15	10	35	40	33							8	5	13	10	16	106	46
9	6	16	10	26	35	22							9	3	12	13	42	86	83
10	8	15	14	22	35	64							10	4	17	12	30	50	37
TOTAL	68	166	107	232	330	397							TOTAL	36	138	91	270	836	694
%	22.6667	33.4677	21.2302	77.3333	66.5323	78.7698							%	11.7647	14.1684	11.5924	88.2353	85.8316	88.4076
	Ssa1, Sis1, Sse1 no ATP						AVG			SD				Ssa1, Ydj1						AVG			SD
	LARGE >2uM			SMALL <2uM				85.3476	14.6524		9.52516	9.52516		LARGE >2uM			SMALL <2uM				66.736	33.264		12.1599	12.1599
	1	2	3	1	2	3								1	2	3	1	2	3
1	9	10	17	4	4	2							1	18	20	13	11	8	1
2	12	15	8	6	2	0							2	21	21	16	20	8	1
3	12	10	14	2	1	0							3	10	26	14	14	9	7
4	11	6	16	6	0	2							4	14	19	11	14	12	4
5	12	8	13	4	0	2							5	13	27	12	13	6	5
6	13	11	7	2	2	0							6	9	12	15	9	9	5
7	11	8	16	5	0	2							7	8	17	15	18	6	2
8	13	10	15	4	0	2							8	28	19	13	16	6	6
9	10	12	13	5	1	2							9	34	16	10	14	6	7
10	16	11	10	3	1	0							10	8	11	14	15	8	3
TOTAL	119	101	129	41	11	12							TOTAL	163	188	133	144	78	41
%	74.375	90.1786	91.4894	25.625	9.82143	8.51064							%	53.0945	70.6767	76.4368	46.9055	29.3233	23.5632
	Ssa1, Ydj1, Sse1						AVG			SD				Luc agg 60', no chaperones						AVG			SD
	LARGE >2uM			SMALL <2uM										LARGE >2uM			SMALL <2uM				78.8376	21.1624		8.14384	8.14384
	1	2	3	1	2	3		67.6771	32.3229		10.2901	10.2901		1	2	3	1	2	3
1	14	16	15	10	7	9							1	49	77	62	17	7	17
2	18	10	10	16	2	3							2	47	95	54	29	16	14
3	9	10	15	10	3	4							3	13	91	79	15	14	17
4	14	11	16	9	2	2							4	55	85	65	17	15	20
5	17	14	14	15	7	4							5	54	88	67	11	17	13
6	11	8	12	7	5	7							6	33	98	54	15	8	24
7	13	11	15	6	7	1							7	46	80	28	16	7	15
8	12	15	14	6	7	5							8	61	74	25	18	17	12
9	16	12	11	16	4	5							9	29	109	70	23	17	16
10	22	11	11	20	2	4							10	55	97	58	18	11	11
TOTAL	146	118	133	115	46	44							TOTAL	442	894	562	179	129	159
%	55.9387	71.9512	75.1412	44.0613	28.0488	24.8588							%	71.1755	87.39	77.9473	28.8245	12.61	22.0527
