# Supplementary material for: Early steps of protein disaggregation by Hsp70 chaperone and class B J-domain proteins are shaped by Hsp110
Source: eLife. 2024 Oct 15;13:RP94795. doi: 10.7554/eLife.94795 (PMC11479587; doi:10.7554/eLife.94795)
Supplement: Figure 3—figure supplement 1—source data 1. [file elife-94795-fig3-figsupp1-data1.xlsx]

## Sheet: Figure 3—figure supplement 1A
											Ssa1, Sis1, Hsp104						Ssa1, Ydj1, Hsp104
										Sse1 (µM)	Mean	SD	N				Mean	SD	N
										0	14.9372	1.6345	3			0	4.9196	0.2669	3
										0.025	26.0858	3.2108	3			0.025	5.4957	0.3953	3
										0.05	32.5226	0.9649	3			0.05	6.0588	1.1666	3
										0.1	37.3648	2.5185	3			0.1	4.813	0.9543	3
										0.2	37.3038	3.6018	3			0.2	2.709	0.451	3
										0.3	34.3245	3.6573	3			0.3	1.361	0.3894	3
										0.5	21.8663	8.5532	3			0.5	0.4082	0.1636	3
										1	0.3843	0.5657	3			1	0.0434	0.0277	3
