# Supplementary material for: Early steps of protein disaggregation by Hsp70 chaperone and class B J-domain proteins are shaped by Hsp110
Source: eLife. 2024 Oct 15;13:RP94795. doi: 10.7554/eLife.94795 (PMC11479587; doi:10.7554/eLife.94795)
Supplement: Figure 3—figure supplement 1—source data 2. [file elife-94795-fig3-figsupp1-data2.xlsx]

## Sheet: Figure 3—figure supplement 1B
Aggregates	Small <2uM	Large >2uM		Small <2uM	Large >2uM		Small <2uM	Large >2uM
1	2	15		0	20		5	18
2	2	18		4	17		0	16
3	5	15		5	19		1	24
4	2	16		4	17		4	18
5	8	17		1	23		0	21
6	6	15		3	14		2	26
7	5	18		3	16		5	22
8	1	15		7	14		5	32
9	8	8		0	22		4	26
10	2	23		2	19		0	26
SUM	41	160		29	181		26	229
	20.398	79.602		13.8095	86.1905		10.1961	89.8039
