# Supplementary material for: Early steps of protein disaggregation by Hsp70 chaperone and class B J-domain proteins are shaped by Hsp110
Source: eLife. 2024 Oct 15;13:RP94795. doi: 10.7554/eLife.94795 (PMC11479587; doi:10.7554/eLife.94795)
Supplement: Figure 3—figure supplement 1—source data 4. [file elife-94795-fig3-figsupp1-data4.xlsx]

## Sheet: Figure 3—figure supplement 1C
Volume(%)	Luc agg + Sis1, Ssa1, 1uM Sse1 after 60min
0.4	0
0.463	0
0.536	0
0.621	0
0.719	0
0.833	0
0.965	0
1.12	0
1.29	0
1.5	0
1.74	0
2.01	0
2.33	0
2.7	0
3.12	0
3.62	0
4.19	0
4.85	0
5.61	0
6.5	0
7.53	0
8.72	0
10.1	0
11.7	0
13.5	0
15.7	0
18.2	0
21	0
24.4	0
28.2	0
32.7	0
37.8	0
43.8	0
50.7	0
58.8	0
68.1	0
78.8	0
91.3	0
106	0.00332
122	0.0208
142	0.0621
164	0.13
190	0.221
220	0.327
255	0.439
295	0.555
342	0.687
396	0.84
459	1.02
531	1.28
615	1.72
712	2.43
825	3.33
955	4.3
1110	5.39
1280	6.72
1480	8.47
1720	10.9
1990	12.5
2300	11.2
2670	8.43
3090	6.05
3580	4.46
4150	3.38
4800	2.7
5560	1.85
6440	0.599
7460	0
8630	0
