# Supplementary material for: Early steps of protein disaggregation by Hsp70 chaperone and class B J-domain proteins are shaped by Hsp110
Source: eLife. 2024 Oct 15;13:RP94795. doi: 10.7554/eLife.94795 (PMC11479587; doi:10.7554/eLife.94795)
Supplement: Figure 3—figure supplement 1—source data 5. [file elife-94795-fig3-figsupp1-data5.xlsx]

## Sheet: Figure 3—figure supplement 1D
Sse1						Sse1-2
	Ssa1 (nM)	Specific binding					Ssa1 (nM)	Specific binding
	8000	1.33733	1.34249	1.24548			16000	1.86809	1.76909	1.54896
	4000	1.27833	1.27754	1.19833			8000	1.66907	1.65172	1.27641
	2000	1.17011	1.27364	1.15301			4000	1.15179	0.958262	0.948023
	1000	1.09149	1.14831	1.09243			2000	0.884773	0.644672	0.649157
	500	0.944805	1.04576	1.00614			1000	0.431094	0.372146	0.403269
	250	0.880464	0.860402	0.894111			500	0.247795	0.192919	0.195323
	125	0.712714	0.709022	0.663334			250	0.13401	0.05483	0.061223
	63	0.506604	0.45926	0.390662			125	-0.02266	-0.00876	0.00562
	32	-0.05107	-0.01206	0.042582
	model fitting
	One site -- Specific binding						One site -- Specific binding
	Best-fit values						Best-fit values
	Bmax	1.306					Bmax	2.269
	Kd	143.2					Kd	4514
	Std. Error						Std. Error
	Bmax	0.03553					Bmax	0.1308
	Kd	17.96					Kd	646.6
	95% Confidence Intervals						95% Confidence Intervals
	Bmax	1,233 to 1,379					Bmax	1,998 to 2,541
	Kd	106,2 to 180,2					Kd	3173 to 5855
	Goodness of Fit						Goodness of Fit
	Degrees of Freedom	25					Degrees of Freedom	22
	R square	0.9414					R square	0.9705
	Absolute Sum of Squares	0.2649					Absolute Sum of Squares	0.2774
	Sy.x	0.1029					Sy.x	0.1123
	Number of points						Number of points
	Analyzed	27					Analyzed	24
