# Supplementary material for: Early steps of protein disaggregation by Hsp70 chaperone and class B J-domain proteins are shaped by Hsp110
Source: eLife. 2024 Oct 15;13:RP94795. doi: 10.7554/eLife.94795 (PMC11479587; doi:10.7554/eLife.94795)
Supplement: Figure 3—figure supplement 1—source data 6. [file elife-94795-fig3-figsupp1-data6.xlsx]

## Sheet: Figure 3—figure supplement 1E
	activity (% native)
Sis1, Ssa1	1.78626	1.81118	1.48282
Sis1, Ssa1, 0,1uM Sse1	2.79416	3.00305	2.42402
Sis1, Ssa1, 1uM Sse1	0.167433	0.28879	0.1602
Sis1, Ssa1, 0,1uM Sse1-2	1.83387	2.01207	2.59037
Sis1, Ssa1, 0,5uM Sse1-2	2.46159	2.49247	2.6196
Sis1, Ssa1, 1uM Sse1-2	2.65407	2.63259	2.56582
Sis1, Ssa1, 2uM Sse1-2	2.14511	1.58787	1.62858
