# Supplementary material for: Early steps of protein disaggregation by Hsp70 chaperone and class B J-domain proteins are shaped by Hsp110
Source: eLife. 2024 Oct 15;13:RP94795. doi: 10.7554/eLife.94795 (PMC11479587; doi:10.7554/eLife.94795)
Supplement: Figure 3—figure supplement 1—source data 7. [file elife-94795-fig3-figsupp1-data7.xlsx]

## Sheet: Figure 3—figure supplement 1F
Time (min)	Sis1, Ssa1, 0.1uM Sse1WT	Sis1, Ssa1, 1uM Sse1-2	Sis1, Ssa1	Sis1, Ssa1, 0,1uM Sse1-2
0	0	0	0	0
0.003333	-0.00701	-0.00483	0.006781	0.020583
0.006667	-0.01044	-0.00469	0.010993	0.029378
0.01	-0.01336	-0.00303	0.014139	0.02886
0.013333	-0.01332	-0.00355	0.016695	0.027787
0.016667	-0.01305	-0.00231	0.020338	0.03348
0.02	-0.01316	-0.00112	0.020687	0.02471
0.023333	-0.01293	0.000649	0.021915	0.029996
0.026667	-0.01204	0.000106	0.024254	0.027851
0.03	-0.01232	0.001577	0.026352	0.032125
0.033333	-0.01338	0.002172	0.027374	0.025948
0.036667	-0.01212	0.003753	0.028157	0.033234
0.04	-0.01176	0.001256	0.034156	0.026623
0.043333	-0.01067	0.002028	0.041304	0.031197
0.046667	-0.00966	0.002768	0.042806	0.027959
0.05	-0.00896	0.003414	0.050632	0.027831
0.053333	-0.00634	0.003891	0.066187	0.02792
0.056667	-0.00594	0.006395	0.061363	0.032385
0.06	-0.00557	0.006859	0.07474	0.036696
0.063333	-0.00679	0.007628	0.071561	0.040466
0.066667	-0.00707	0.009277	0.072988	0.03644
0.07	-0.00926	0.010924	0.059798	0.038923
0.073333	-0.00974	0.011787	0.063159	0.029777
0.076667	-0.01139	0.014071	0.04214	0.022508
0.08	-0.0109	0.016982	0.045065	0.024744
0.083333	-0.00969	0.016789	0.032274	0.023541
0.086667	-0.01018	0.019143	0.032259	0.020784
0.09	-0.01079	0.020612	0.023067	0.030409
0.093333	-0.01005	0.021205	0.020774	0.031899
0.096667	-0.01013	0.02094	0.017028	0.019974
0.1	-0.00935	0.020408	0.014693	0.025093
0.103333	-0.00804	0.019657	0.009659	0.029505
0.106667	-0.00527	0.017921	0.013161	0.024119
0.11	-0.00505	0.018953	0.011228	0.018624
0.113333	-0.00449	0.017332	0.010731	0.03273
0.116667	-0.00563	0.016464	0.013759	0.035539
0.12	-0.00701	0.017738	0.013438	0.024303
0.123333	-0.00871	0.018204	0.013433	0.030377
0.126667	-0.00869	0.01806	0.015031	0.036211
0.13	-0.00983	0.016649	0.015534	0.025887
0.133333	-0.01054	0.018673	0.01553	0.028047
0.136667	-0.01116	0.014012	0.01888	0.026063
0.14	-0.0112	0.01589	0.019314	0.025107
0.143333	-0.01207	0.014498	0.019914	0.02443
0.146667	-0.01099	0.016206	0.023261	0.028051
0.15	-0.00945	0.015337	0.023006	0.026031
0.153333	-0.00971	0.018158	0.0227	0.032305
0.156667	-0.00925	0.017308	0.023091	0.029662
0.16	-0.00964	0.016952	0.024319	0.029269
0.163333	-0.01076	0.017801	0.023135	0.028052
0.166667	-0.01313	0.016336	0.02638	0.026291
0.17	-0.01183	0.015851	0.029058	0.025831
0.173333	-0.01282	0.014723	0.037926	0.023649
0.176667	-0.01272	0.014433	0.055273	0.021625
0.18	-0.01225	0.011033	0.061334	0.026326
0.183333	-0.01079	0.012669	0.059416	0.020714
0.186667	-0.0109	0.010753	0.057796	0.02704
0.19	-0.0114	0.009171	0.064299	0.018972
0.193333	-0.01076	0.006795	0.061359	0.027798
0.196667	-0.0123	0.007028	0.053757	0.024471
0.2	-0.01346	0.005171	0.05403	0.027633
0.203333	-0.01266	0.005819	0.062837	0.023204
0.206667	-0.0122	0.006334	0.054188	0.024889
0.21	-0.01448	0.007028	0.03584	0.023511
0.213333	-0.01306	0.007774	0.035795	0.020359
0.216667	-0.01388	0.008954	0.038414	0.030966
0.22	-0.01478	0.007825	0.026063	0.031217
0.223333	-0.01639	0.008644	0.015045	0.038889
0.226667	-0.01541	0.008773	0.018678	0.035133
0.23	-0.01766	0.005597	0.017261	0.035617
0.233333	-0.01874	0.004169	0.009229	0.025303
0.236667	-0.01968	0.002581	0.01033	0.026551
0.24	-0.01878	0.001001	0.012955	0.025218
0.243333	-0.01857	9.55e-05	0.008459	0.021946
0.246667	-0.01661	0.003625	0.009874	0.026264
0.25	-0.01556	0.004734	0.010658	0.019648
0.253333	-0.01679	0.005922	0.009225	0.015077
0.256667	-0.01717	0.007203	0.010023	0.018169
0.26	-0.01739	0.006735	0.00707	0.027465
0.263333	-0.01734	0.004641	0.002126	0.027128
0.266667	-0.01711	0.00327	0.000977	0.031272
0.27	-0.0158	0.000666	-4.2e-05	0.038307
0.273333	-0.01716	-0.0006	-0.00221	0.030008
0.276667	-0.01817	-0.00196	0.002055	0.022528
0.28	-0.01964	-0.0052	0.002289	0.02286
0.283333	-0.02056	-0.0061	0.004401	0.019613
0.286667	-0.0216	-0.00429	0.003149	0.006489
0.29	-0.01992	-0.00644	0.00185	0.008299
0.293333	-0.02014	-0.00781	0.002118	0.011006
0.296667	-0.01981	-0.006	0.00216	0.011482
0.3	-0.01953	-0.00697	0.002678	0.018599
0.303333	-0.01955	-0.00994	0.004763	0.022979
0.306667	-0.01974	-0.0095	0.005617	0.024621
0.31	-0.01839	-0.0096	0.007213	0.026098
0.313333	-0.01918	-0.0112	0.006645	0.019396
0.316667	-0.02005	-0.01382	0.006765	0.026292
0.32	-0.0202	-0.01452	0.007362	0.032495
0.323333	-0.02143	-0.01503	0.00612	0.033044
0.326667	-0.02265	-0.01535	0.005344	0.028708
0.33	-0.02395	-0.01753	0.00555	0.02775
0.333333	-0.02341	-0.01757	0.006252	0.020563
0.336667	-0.0236	-0.01693	0.005731	0.02056
0.34	-0.02462	-0.01662	0.005753	0.020197
0.343333	-0.02517	-0.01809	0.003977	0.021264
0.346667	-0.02476	-0.01869	0.003877	0.027983
0.35	-0.02658	-0.01747	0.004745	0.026465
0.353333	-0.02586	-0.01978	0.001026	0.021542
0.356667	-0.0244	-0.02181	0.00364	0.019357
0.36	-0.02512	-0.0206	0.004004	0.016554
0.363333	-0.02535	-0.01822	0.004345	0.011794
0.366667	-0.0232	-0.01856	0.002824	0.010032
0.37	-0.02571	-0.01656	0.00451	0.013687
0.373333	-0.02668	-0.01783	0.005748	0.013857
0.376667	-0.0258	-0.02077	0.00233	0.014544
0.38	-0.02553	-0.0209	0.005356	0.018822
0.383333	-0.02524	-0.02372	0.001816	0.01918
0.386667	-0.024	-0.02565	0.004293	0.017978
0.39	-0.02417	-0.02527	-0.00012	0.019076
0.393333	-0.02434	-0.022	0.002648	0.019211
0.396667	-0.02455	-0.0242	0.000728	0.018331
0.4	-0.02693	-0.0222	0.002845	0.019411
0.403333	-0.02675	-0.0207	-0.0002	0.013671
0.406667	-0.02746	-0.02153	0.001164	0.007951
0.41	-0.02676	-0.02333	0.001018	0.004553
0.413333	-0.02796	-0.02411	-0.00028	0.000362
0.416667	-0.02729	-0.02377	0.000513	0.005627
0.42	-0.02888	-0.02669	-4.9e-05	0.003945
0.423333	-0.02758	-0.02538	0.001628	0.013001
0.426667	-0.02927	-0.02544	-0.00017	0.011386
0.43	-0.02836	-0.02387	0.003153	0.016202
0.433333	-0.02875	-0.02433	-0.00015	0.006453
0.436667	-0.02767	-0.02307	0.002774	0.011781
0.44	-0.02776	-0.02518	-0.00023	0.012922
0.443333	-0.0288	-0.02652	0.002721	0.021382
0.446667	-0.02992	-0.02799	-0.0013	0.022009
0.45	-0.0306	-0.02846	0.002537	0.024654
0.453333	-0.03087	-0.0295	-0.00103	0.026012
0.456667	-0.03204	-0.03012	0.001239	0.017828
0.46	-0.03108	-0.03042	-0.00342	0.014408
0.463333	-0.0308	-0.0312	-0.00435	0.011306
0.466667	-0.03153	-0.03373	-0.0076	0.008142
0.47	-0.03187	-0.0346	-0.00651	-0.0004
0.473333	-0.03354	-0.03451	-0.00902	0.001191
0.476667	-0.03325	-0.03413	-0.00734	0.002016
0.48	-0.03388	-0.03425	-0.00258	0.004892
0.483333	-0.03242	-0.03089	-0.00443	0.012357
0.486667	-0.03186	-0.03053	-0.00201	0.016853
0.49	-0.03091	-0.0306	-0.00385	0.019444
0.493333	-0.03142	-0.03098	-0.0017	0.021865
0.496667	-0.0323	-0.03007	-0.00726	0.013767
0.5	0.014938	-0.03007	-0.04174	-0.03549
0.503333	0.013806	-0.01205	-0.03388	-0.04474
0.506667	0.014861	-0.00695	-0.02758	-0.00341
0.51	0.014206	-0.00017	-0.02183	-0.02119
0.513333	0.020754	0.003573	-0.02143	-0.00929
0.516667	0.021184	0.009363	-0.01738	0.002314
0.52	0.022143	0.010978	-0.01489	0.015837
0.523333	0.024634	0.011763	-0.01208	0.015945
0.526667	0.02758	0.013106	-0.00894	0.021975
0.53	0.027209	0.013574	-0.00641	0.024781
0.533333	0.028247	0.014996	-0.00443	0.023693
0.536667	0.029195	0.016161	-0.00118	0.018453
0.54	0.030887	0.019168	-0.00149	0.024113
0.543333	0.031365	0.01995	-0.00122	0.026472
0.546667	0.032787	0.021335	-0.00083	0.03147
0.55	0.033508	0.023275	0.000984	0.033511
0.553333	0.03571	0.024807	0.001648	0.036864
0.556667	0.035351	0.024914	0.003375	0.036664
0.56	0.035285	0.02781	0.003002	0.037221
0.563333	0.036572	0.030391	0.004415	0.032133
0.566667	0.03835	0.033901	0.00699	0.033073
0.57	0.039221	0.035813	0.006426	0.037686
0.573333	0.038459	0.040007	0.007341	0.037819
0.576667	0.038813	0.039884	0.009581	0.040209
0.58	0.038982	0.04219	0.009154	0.04124
0.583333	0.037766	0.042184	0.007682	0.044694
0.586667	0.037889	0.041915	0.010077	0.043809
0.59	0.039468	0.041781	0.009745	0.040274
0.593333	0.040414	0.044217	0.009291	0.044529
0.596667	0.04048	0.044331	0.012193	0.0456
0.6	0.04184	0.046554	0.012238	0.042723
0.603333	0.042149	0.048761	0.011817	0.045045
0.606667	0.043843	0.048847	0.015117	0.044537
0.61	0.044548	0.048919	0.016083	0.042816
0.613333	0.045164	0.048454	0.01411	0.042869
0.616667	0.046408	0.048319	0.015721	0.047271
0.62	0.046686	0.04995	0.018045	0.043773
0.623333	0.046081	0.051192	0.016623	0.047568
0.626667	0.047964	0.053779	0.017188	0.046948
0.63	0.048676	0.056371	0.018221	0.048058
0.633333	0.04963	0.055445	0.018752	0.046394
0.636667	0.049781	0.056947	0.019998	0.042798
0.64	0.050811	0.057398	0.020969	0.041897
0.643333	0.050076	0.05637	0.021273	0.041816
0.646667	0.050826	0.05745	0.023733	0.044771
0.65	0.051265	0.059403	0.0234	0.045581
0.653333	0.053882	0.058364	0.021595	0.0494
0.656667	0.055644	0.059978	0.022999	0.053994
0.66	0.057083	0.060813	0.023743	0.051389
0.663333	0.057832	0.060909	0.024376	0.05636
0.666667	0.059568	0.063436	0.025644	0.053045
0.67	0.059115	0.064974	0.026564	0.057402
0.673333	0.058982	0.0663	0.025801	0.054609
0.676667	0.060378	0.067243	0.02568	0.056244
0.68	0.062909	0.067679	0.026974	0.054926
0.683333	0.060989	0.066112	0.026814	0.057861
0.686667	0.062244	0.066717	0.028913	0.059591
0.69	0.06441	0.065593	0.02838	0.065466
0.693333	0.064681	0.065426	0.030263	0.068448
0.696667	0.065207	0.067393	0.028951	0.06427
0.7	0.067915	0.068357	0.030746	0.061116
0.703333	0.069118	0.071227	0.029302	0.059073
0.706667	0.068551	0.073448	0.030874	0.058111
0.71	0.070485	0.075109	0.031261	0.059205
0.713333	0.069959	0.075245	0.030249	0.061238
0.716667	0.071386	0.07731	0.029347	0.069028
0.72	0.071243	0.07682	0.028654	0.070329
0.723333	0.073698	0.079602	0.028739	0.069473
0.726667	0.074324	0.081611	0.028359	0.066212
0.73	0.076285	0.082071	0.030217	0.063871
0.733333	0.076085	0.082911	0.031329	0.058166
0.736667	0.078028	0.083679	0.033871	0.058973
0.74	0.077296	0.082997	0.034433	0.059248
0.743333	0.077987	0.084954	0.036192	0.065665
0.746667	0.079855	0.085988	0.036576	0.066195
0.75	0.082078	0.086672	0.038303	0.069437
0.753333	0.082519	0.089276	0.037315	0.067183
0.756667	0.085245	0.089571	0.039107	0.07053
0.76	0.086176	0.090225	0.039494	0.070446
0.763333	0.087405	0.092864	0.040354	0.076963
0.766667	0.08779	0.093071	0.037632	0.080147
0.77	0.091232	0.094622	0.041123	0.079662
0.773333	0.091599	0.096769	0.04004	0.08145
0.776667	0.094189	0.098236	0.039844	0.076666
0.78	0.095257	0.09957	0.040943	0.07366
0.783333	0.097189	0.102311	0.042938	0.072402
0.786667	0.096466	0.102579	0.039434	0.071099
0.79	0.098986	0.104663	0.041658	0.063141
0.793333	0.099907	0.105103	0.041177	0.062796
0.796667	0.102283	0.105553	0.039556	0.060612
0.8	0.10454	0.109609	0.038326	0.06119
0.803333	0.106161	0.111037	0.039982	0.070116
0.806667	0.107486	0.111582	0.040138	0.071121
0.81	0.109067	0.113842	0.041534	0.076782
0.813333	0.110275	0.114848	0.045185	0.084108
0.816667	0.111917	0.114188	0.046487	0.082807
0.82	0.114437	0.115358	0.049316	0.085321
0.823333	0.115962	0.118102	0.048047	0.094151
0.826667	0.116229	0.118466	0.049446	0.096284
0.83	0.116767	0.119819	0.047692	0.096567
0.833333	0.117691	0.121102	0.050246	0.100881
0.836667	0.119076	0.123191	0.048697	0.099732
0.84	0.121354	0.123813	0.051662	0.0925
0.843333	0.124742	0.125121	0.048839	0.095835
0.846667	0.12627	0.128149	0.050583	0.091932
0.85	0.128997	0.129719	0.049228	0.091946
0.853333	0.131488	0.131925	0.05145	0.086527
0.856667	0.13428	0.134567	0.049163	0.091442
0.86	0.134093	0.137082	0.053361	0.091287
0.863333	0.137459	0.138365	0.052501	0.098593
0.866667	0.137461	0.139404	0.05608	0.100366
0.87	0.139646	0.13998	0.055671	0.107728
0.873333	0.140596	0.139353	0.059298	0.10991
0.876667	0.14403	0.141272	0.058057	0.105443
0.88	0.145932	0.142387	0.060017	0.10568
0.883333	0.150154	0.142325	0.060674	0.104874
0.886667	0.151454	0.144041	0.064095	0.104322
0.89	0.154281	0.147249	0.064643	0.100331
0.893333	0.156659	0.147413	0.065526	0.102112
0.896667	0.159158	0.148997	0.066429	0.104074
0.9	0.160467	0.152451	0.064908	0.105793
0.903333	0.164136	0.153088	0.06355	0.10791
0.906667	0.165457	0.153024	0.06234	0.113204
0.91	0.16751	0.155395	0.063903	0.115508
0.913333	0.169047	0.157129	0.063154	0.11397
0.916667	0.171553	0.159002	0.065036	0.117258
0.92	0.172655	0.161668	0.065721	0.115268
0.923333	0.175448	0.16409	0.065498	0.119376
0.926667	0.178594	0.165183	0.066202	0.122043
0.93	0.181403	0.167341	0.066862	0.11694
0.933333	0.182924	0.169353	0.06793	0.113485
0.936667	0.186284	0.169889	0.069405	0.11953
0.94	0.187058	0.172152	0.07209	0.11605
0.943333	0.188639	0.174496	0.071882	0.115165
0.946667	0.191385	0.17624	0.07359	0.122762
0.95	0.194058	0.177724	0.072141	0.127563
0.953333	0.196542	0.180629	0.072207	0.125159
0.956667	0.200583	0.18222	0.070017	0.129391
0.96	0.203219	0.18276	0.071266	0.133686
0.963333	0.206008	0.182947	0.071374	0.135483
0.966667	0.208706	0.183907	0.074323	0.137394
0.97	0.211532	0.185833	0.074672	0.140649
0.973333	0.214173	0.186973	0.078765	0.135862
0.976667	0.217471	0.189828	0.077701	0.13001
0.98	0.220429	0.193191	0.079887	0.131229
0.983333	0.224791	0.196489	0.079493	0.130812
0.986667	0.227652	0.198646	0.082047	0.131576
0.99	0.229885	0.201394	0.081581	0.136741
0.993333	0.23233	0.205084	0.083643	0.143314
0.996667	0.23376	0.206254	0.081146	0.141445
1	0.236132	0.208474	0.081448	0.139985
1.00333	0.238397	0.212524	0.08095	0.139546
1.00667	0.241205	0.214183	0.082975	0.143353
1.01	0.243262	0.215324	0.086332	0.14358
1.01333	0.247922	0.218464	0.089136	0.14435
1.01667	0.249841	0.220605	0.090015	0.147881
1.02	0.253495	0.221116	0.090253	0.142122
1.02333	0.256724	0.223824	0.089815	0.139234
1.02667	0.260152	0.226258	0.086715	0.138985
1.03	0.263371	0.227018	0.086855	0.144672
1.03333	0.266689	0.230356	0.08861	0.148555
1.03667	0.269258	0.232575	0.088471	0.159192
1.04	0.27277	0.235798	0.087546	0.157963
1.04333	0.276253	0.237444	0.090671	0.164215
1.04667	0.276803	0.240397	0.09228	0.161079
1.05	0.280657	0.24146	0.08964	0.159787
1.05333	0.285346	0.243006	0.091406	0.163935
1.05667	0.288149	0.244553	0.094902	0.162925
1.06	0.290712	0.246102	0.092687	0.166184
1.06333	0.295118	0.248625	0.09332	0.168343
1.06667	0.297534	0.252198	0.095678	0.170654
1.07	0.298628	0.255014	0.096633	0.170355
1.07333	0.302863	0.259609	0.094759	0.173762
1.07667	0.308668	0.263839	0.096666	0.171552
1.08	0.311851	0.267666	0.096799	0.176961
1.08333	0.316107	0.268067	0.098211	0.171055
1.08667	0.320256	0.271849	0.099034	0.173684
1.09	0.324043	0.2715	0.101956	0.180347
1.09333	0.325673	0.273832	0.102429	0.176875
1.09667	0.329885	0.276162	0.103333	0.176147
1.1	0.331901	0.279642	0.10224	0.179464
1.10333	0.33543	0.280853	0.102068	0.174102
1.10667	0.337418	0.285306	0.101826	0.171291
1.11	0.341386	0.287661	0.103957	0.178028
1.11333	0.345009	0.289073	0.106668	0.1824
1.11667	0.350867	0.292419	0.110583	0.189338
1.12	0.354316	0.295697	0.112073	0.196271
1.12333	0.358891	0.296784	0.11271	0.20186
1.12667	0.362035	0.298418	0.112797	0.197586
1.13	0.365014	0.301191	0.110904	0.198247
1.13333	0.3655	0.303502	0.111367	0.1953
1.13667	0.369555	0.30451	0.112965	0.197716
1.14	0.372261	0.308768	0.113649	0.199011
1.14333	0.376013	0.312562	0.11344	0.198521
1.14667	0.378644	0.314457	0.115386	0.195633
1.15	0.384048	0.316622	0.115454	0.204222
1.15333	0.387655	0.320379	0.11672	0.205067
1.15667	0.393073	0.323486	0.117237	0.203275
1.16	0.395314	0.325817	0.118814	0.208832
1.16333	0.401419	0.330574	0.120945	0.214222
1.16667	0.40498	0.333832	0.120456	0.208647
1.17	0.408248	0.336234	0.119316	0.205193
1.17333	0.411314	0.339076	0.122586	0.2143
1.17667	0.417519	0.341574	0.124657	0.215064
1.18	0.419563	0.343283	0.123612	0.214848
1.18333	0.424415	0.345502	0.126686	0.221034
1.18667	0.427975	0.348372	0.130582	0.22435
1.19	0.432693	0.349919	0.130035	0.225202
1.19333	0.435568	0.352791	0.131868	0.227803
1.19667	0.441185	0.356237	0.132315	0.231995
1.2	0.44367	0.360261	0.131434	0.230363
1.20333	0.449399	0.364329	0.131961	0.234021
1.20667	0.45172	0.367886	0.132866	0.23271
1.21	0.457502	0.370705	0.132987	0.232221
1.21333	0.459461	0.374603	0.135865	0.23319
1.21667	0.464447	0.376511	0.136738	0.235485
1.22	0.466992	0.379103	0.138724	0.236759
1.22333	0.472403	0.382611	0.139061	0.240534
1.22667	0.475941	0.387094	0.139291	0.244533
1.23	0.482014	0.388428	0.141676	0.247133
1.23333	0.487128	0.391698	0.141477	0.249343
1.23667	0.492299	0.394518	0.141192	0.254221
1.24	0.497172	0.39804	0.142895	0.254906
1.24333	0.50168	0.400145	0.145054	0.257623
1.24667	0.505143	0.401847	0.144535	0.256689
1.25	0.509148	0.406717	0.148713	0.261448
1.25333	0.513923	0.410196	0.149022	0.259955
1.25667	0.516648	0.41252	0.149227	0.262658
1.26	0.521307	0.416271	0.150312	0.268947
1.26333	0.526148	0.420427	0.152933	0.272822
1.26667	0.530738	0.422556	0.153674	0.27287
1.27	0.533925	0.424003	0.155716	0.275955
1.27333	0.539451	0.427161	0.158307	0.277231
1.27667	0.543091	0.430163	0.159963	0.273421
1.28	0.546639	0.435813	0.158765	0.275027
1.28333	0.552968	0.438574	0.158411	0.27665
1.28667	0.55953	0.442752	0.159386	0.280119
1.29	0.563871	0.445958	0.159983	0.281421
1.29333	0.568224	0.448562	0.15871	0.285962
1.29667	0.57416	0.452499	0.159226	0.284381
1.3	0.576373	0.456337	0.161756	0.285326
1.30333	0.579728	0.460057	0.16074	0.286254
1.30667	0.585162	0.464181	0.162063	0.283729
1.31	0.589894	0.466954	0.163845	0.288649
1.31333	0.5946	0.470971	0.165082	0.292358
1.31667	0.600963	0.473998	0.166973	0.295652
1.32	0.606683	0.477364	0.168716	0.296517
1.32333	0.611179	0.480291	0.172005	0.299389
1.32667	0.615978	0.483952	0.172396	0.299454
1.33	0.621592	0.483874	0.173763	0.29911
1.33333	0.624425	0.488504	0.174211	0.296999
1.33667	0.629037	0.490442	0.175244	0.29697
1.34	0.635329	0.494767	0.175397	0.30441
1.34333	0.641094	0.498259	0.177837	0.303095
1.34667	0.645869	0.503152	0.179182	0.309304
1.35	0.651755	0.505974	0.179838	0.312873
1.35333	0.654606	0.510968	0.182516	0.321397
1.35667	0.658911	0.514629	0.184	0.31655
1.36	0.664312	0.518407	0.183242	0.319801
1.36333	0.667946	0.522775	0.182216	0.319854
1.36667	0.673824	0.527894	0.183429	0.323686
1.37	0.679521	0.531412	0.183323	0.324865
1.37333	0.684365	0.532232	0.182258	0.33197
1.37667	0.688807	0.536119	0.185611	0.334738
1.38	0.694201	0.539584	0.188452	0.337554
1.38333	0.697517	0.543739	0.188077	0.338691
1.38667	0.703722	0.547657	0.191727	0.340887
1.39	0.707722	0.552812	0.194216	0.341276
1.39333	0.713198	0.557235	0.194411	0.34095
1.39667	0.718793	0.560188	0.19508	0.340048
1.4	0.725432	0.562913	0.199637	0.343651
1.40333	0.731209	0.566476	0.197599	0.346326
1.40667	0.737517	0.569974	0.198348	0.34805
1.41	0.743395	0.574041	0.201058	0.353707
1.41333	0.748275	0.578741	0.200574	0.360732
1.41667	0.754753	0.5808	0.200106	0.364744
1.42	0.758993	0.584211	0.202648	0.366017
1.42333	0.76265	0.591032	0.203078	0.371411
1.42667	0.765813	0.594419	0.202695	0.370082
1.43	0.771166	0.596771	0.206325	0.370066
1.43333	0.774945	0.602727	0.207265	0.372526
1.43667	0.780539	0.605696	0.209517	0.374941
1.44	0.786409	0.60865	0.209897	0.375969
1.44333	0.792221	0.612948	0.213888	0.379103
1.44667	0.797249	0.617701	0.215053	0.381142
1.45	0.801649	0.621127	0.216257	0.382825
1.45333	0.807263	0.626383	0.217364	0.382721
1.45667	0.813184	0.627606	0.219645	0.38349
1.46	0.819391	0.630741	0.219235	0.387454
1.46333	0.824805	0.635289	0.220503	0.392655
1.46667	0.831555	0.639225	0.220806	0.390836
1.47	0.837477	0.642905	0.220875	0.395537
1.47333	0.842482	0.648908	0.223232	0.392686
1.47667	0.847796	0.653487	0.222865	0.397988
1.48	0.85322	0.656758	0.223402	0.394693
1.48333	0.8575	0.660507	0.224407	0.399971
1.48667	0.862643	0.663994	0.22677	0.403435
1.49	0.869597	0.66787	0.229106	0.407394
1.49333	0.875879	0.671249	0.229046	0.410034
1.49667	0.880151	0.676176	0.231132	0.409854
1.5	0.88716	0.680877	0.23375	0.41126
1.50333	0.892163	0.685774	0.235778	0.411204
1.50667	0.896739	0.690656	0.236253	0.413347
1.51	0.901399	0.696645	0.239049	0.416481
1.51333	0.910111	0.699724	0.241252	0.421666
1.51667	0.91509	0.702255	0.243535	0.422302
1.52	0.921391	0.70614	0.243158	0.425533
1.52333	0.927427	0.709586	0.244642	0.433989
1.52667	0.934622	0.714412	0.246734	0.428306
1.53	0.938672	0.720018	0.248116	0.425765
1.53333	0.944173	0.725385	0.248324	0.428253
1.53667	0.949604	0.73024	0.248342	0.430894
1.54	0.954651	0.735311	0.251182	0.42865
1.54333	0.959664	0.737839	0.253942	0.437888
1.54667	0.968321	0.742163	0.254528	0.443805
1.55	0.975008	0.747286	0.254961	0.449
1.55333	0.981361	0.75017	0.258637	0.451098
1.55667	0.987813	0.753717	0.258416	0.457947
1.56	0.994468	0.758531	0.257367	0.453286
1.56333	0.999612	0.762374	0.259606	0.457438
1.56667	1.00535	0.767326	0.261827	0.462608
1.57	1.01098	0.773426	0.260736	0.461147
1.57333	1.01648	0.776741	0.263402	0.463098
1.57667	1.02175	0.781206	0.267177	0.465187
1.58	1.02795	0.786702	0.265122	0.473617
1.58333	1.03421	0.789258	0.266716	0.468913
1.58667	1.03942	0.792628	0.271402	0.474678
1.59	1.04521	0.797345	0.271364	0.477609
1.59333	1.04898	0.799685	0.270224	0.482058
1.59667	1.05372	0.802931	0.276588	0.481121
1.6	1.05983	0.80761	0.27738	0.484579
1.60333	1.06609	0.812343	0.275364	0.482567
1.60667	1.07391	0.817167	0.280166	0.483351
1.61	1.08096	0.823116	0.28207	0.490773
1.61333	1.08564	0.828651	0.279977	0.492104
1.61667	1.09119	0.832109	0.284243	0.490496
1.62	1.09905	0.837006	0.285912	0.49774
1.62333	1.10455	0.842948	0.285072	0.501443
1.62667	1.11224	0.84933	0.28805	0.49862
1.63	1.11853	0.852458	0.289984	0.500971
1.63333	1.12451	0.8592	0.288984	0.507648
1.63667	1.13033	0.86216	0.294068	0.50483
1.64	1.13599	0.867364	0.293133	0.501953
1.64333	1.14128	0.870277	0.294691	0.505386
1.64667	1.14823	0.873595	0.298195	0.510328
1.65	1.15369	0.879366	0.297994	0.515081
1.65333	1.15992	0.884886	0.297299	0.520121
1.65667	1.16761	0.888978	0.299328	0.522294
1.66	1.17495	0.894197	0.300756	0.528757
1.66333	1.18151	0.899065	0.300564	0.527304
1.66667	1.1881	0.900109	0.301237	0.526859
1.67	1.19462	0.906061	0.302882	0.531831
1.67333	1.19849	0.91106	0.3047	0.533522
1.67667	1.20412	0.914045	0.304637	0.53641
1.68	1.21102	0.920463	0.306991	0.533697
1.68333	1.21765	0.926134	0.308835	0.540914
1.68667	1.22426	0.930017	0.31046	0.537038
1.69	1.23171	0.932879	0.313043	0.549388
1.69333	1.2393	0.937696	0.314887	0.543373
1.69667	1.24484	0.939831	0.317836	0.556338
1.7	1.2513	0.945803	0.319606	0.551284
1.70333	1.25896	0.949078	0.32194	0.561775
1.70667	1.26432	0.954554	0.323186	0.557887
1.71	1.27048	0.961132	0.325246	0.569269
1.71333	1.27621	0.96732	0.324046	0.564582
1.71667	1.28272	0.971475	0.326503	0.573539
1.72	1.28741	0.97788	0.326527	0.568408
1.72333	1.29504	0.98114	0.329464	0.574938
1.72667	1.29875	0.986276	0.330545	0.576572
1.73	1.30544	0.991961	0.333145	0.584634
1.73333	1.31325	0.996175	0.335215	0.587738
1.73667	1.31849	1.00107	0.3343	0.596253
1.74	1.32355	1.00533	0.33634	0.593032
1.74333	1.33232	1.00881	0.336453	0.596424
1.74667	1.33812	1.01153	0.33919	0.595731
1.75	1.34313	1.01927	0.33944	0.59509
1.75333	1.34924	1.02389	0.342431	0.5939
1.75667	1.35746	1.03069	0.344025	0.602312
1.76	1.36316	1.03476	0.345719	0.60162
1.76333	1.37123	1.04077	0.345786	0.602689
1.76667	1.37847	1.04357	0.347141	0.60566
1.77	1.38677	1.04947	0.350257	0.608641
1.77333	1.39262	1.05386	0.350039	0.607017
1.77667	1.39839	1.05858	0.352164	0.603694
1.78	1.40351	1.06252	0.353693	0.604098
1.78333	1.40982	1.06774	0.354586	0.603291
1.78667	1.4151	1.07112	0.356409	0.607435
1.79	1.42184	1.07824	0.359795	0.615083
1.79333	1.42854	1.08388	0.362039	0.625764
1.79667	1.43472	1.0905	0.363378	0.631779
1.8	1.44164	1.0952	0.36777	0.640672
1.80333	1.44853	1.1001	0.366739	0.643151
1.80667	1.45568	1.10401	0.36717	0.64272
1.81	1.46293	1.10878	0.368637	0.641047
1.81333	1.46972	1.11232	0.370068	0.64623
1.81667	1.47605	1.11865	0.370261	0.642522
1.82	1.48274	1.12586	0.371176	0.646413
1.82333	1.48868	1.12924	0.37305	0.651581
1.82667	1.49647	1.13477	0.375328	0.655061
1.83	1.5043	1.1412	0.376626	0.652384
1.83333	1.50964	1.14481	0.379757	0.658512
1.83667	1.51642	1.14725	0.381349	0.660429
1.84	1.52392	1.15409	0.383097	0.664623
1.84333	1.52919	1.15856	0.384343	0.664419
1.84667	1.53336	1.16439	0.384879	0.671178
1.85	1.54221	1.16932	0.386679	0.674053
1.85333	1.54761	1.17512	0.388582	0.672658
1.85667	1.55357	1.17935	0.389325	0.674476
1.86	1.56162	1.18407	0.389229	0.68303
1.86333	1.57073	1.1881	0.391964	0.686759
1.86667	1.57572	1.19351	0.391404	0.689108
1.87	1.58282	1.19722	0.395021	0.695839
1.87333	1.58976	1.20148	0.399336	0.697564
1.87667	1.59672	1.20854	0.399645	0.696552
1.88	1.60203	1.21322	0.400456	0.697891
1.88333	1.60912	1.21936	0.404361	0.701154
1.88667	1.61586	1.22486	0.405632	0.703004
1.89	1.62274	1.23094	0.404411	0.708664
1.89333	1.62901	1.23516	0.40716	0.713132
1.89667	1.63673	1.24176	0.410668	0.715698
1.9	1.64445	1.24654	0.409935	0.718761
1.90333	1.65187	1.25326	0.410497	0.72165
1.90667	1.65917	1.25617	0.41427	0.724166
1.91	1.66472	1.26147	0.416337	0.726752
1.91333	1.67071	1.2638	0.416943	0.728448
1.91667	1.67702	1.26976	0.420951	0.729333
1.92	1.68331	1.2759	0.422241	0.73287
1.92333	1.68913	1.2829	0.422547	0.736106
1.92667	1.69697	1.28898	0.426754	0.73649
1.93	1.70438	1.29568	0.426547	0.741206
1.93333	1.71094	1.2985	0.426483	0.743975
1.93667	1.71894	1.30361	0.428926	0.746261
1.94	1.72657	1.30953	0.430696	0.749246
1.94333	1.73333	1.31479	0.431695	0.74949
1.94667	1.74057	1.31871	0.433437	0.750259
1.95	1.74597	1.32601	0.434852	0.75326
1.95333	1.75348	1.32949	0.436263	0.755591
1.95667	1.75957	1.33594	0.438225	0.75607
1.96	1.76795	1.34114	0.437167	0.760767
1.96333	1.77432	1.3468	0.439509	0.762999
1.96667	1.78217	1.35253	0.442758	0.766011
1.97	1.78868	1.35759	0.445782	0.769852
1.97333	1.79526	1.35935	0.446079	0.771949
1.97667	1.80011	1.36417	0.450555	0.777024
1.98	1.80904	1.37087	0.451037	0.780187
1.98333	1.81345	1.37332	0.452635	0.78271
1.98667	1.81948	1.37934	0.453965	0.785536
1.99	1.8259	1.38583	0.456743	0.789479
1.99333	1.83329	1.39188	0.458038	0.792988
1.99667	1.83735	1.39789	0.460848	0.79771
2	1.84677	1.40454	0.461649	0.805107
2.00333	1.85387	1.41072	0.463288	0.810754
2.00667	1.86139	1.41572	0.464891	0.81617
2.01	1.86894	1.4216	0.46335	0.824791
2.01333	1.87533	1.4254	0.466875	0.827866
2.01667	1.88292	1.43383	0.469163	0.832691
2.02	1.89112	1.43979	0.468403	0.835512
2.02333	1.89839	1.44693	0.472545	0.840857
2.02667	1.90375	1.44973	0.476499	0.839666
2.03	1.91045	1.45606	0.476461	0.84753
2.03333	1.91755	1.45981	0.477723	0.846871
2.03667	1.92449	1.46479	0.482773	0.848882
2.04	1.92938	1.46932	0.48404	0.854258
2.04333	1.93639	1.47512	0.487607	0.860727
2.04667	1.94257	1.47933	0.491162	0.862579
2.05	1.94932	1.48338	0.490521	0.868999
2.05333	1.955	1.48938	0.491394	0.874032
2.05667	1.96312	1.49417	0.492923	0.874756
2.06	1.96894	1.50057	0.493841	0.874864
2.06333	1.97729	1.50754	0.494313	0.874643
2.06667	1.9843	1.51312	0.498054	0.874919
2.07	1.99064	1.51856	0.500631	0.876708
2.07333	1.9976	1.52319	0.503201	0.878185
2.07667	2.00644	1.52855	0.503837	0.88065
2.08	2.01299	1.53288	0.50452	0.886191
2.08333	2.02078	1.53867	0.505304	0.889087
2.08667	2.02839	1.54203	0.505799	0.890757
2.09	2.03454	1.54868	0.508685	0.897198
2.09333	2.04031	1.55404	0.5092	0.89836
2.09667	2.04802	1.55996	0.510354	0.90167
2.1	2.05408	1.56488	0.51512	0.903008
2.10333	2.06173	1.57277	0.514884	0.907503
2.10667	2.06707	1.57739	0.515966	0.908591
2.11	2.07448	1.58304	0.518844	0.912138
2.11333	2.08149	1.58879	0.521758	0.913942
2.11667	2.08687	1.59369	0.522618	0.920089
2.12	2.09222	1.5965	0.524461	0.921027
2.12333	2.10063	1.60334	0.524682	0.924712
2.12667	2.10825	1.6083	0.527931	0.926523
2.13	2.11458	1.61308	0.530167	0.927674
2.13333	2.12169	1.61966	0.529488	0.931285
2.13667	2.1287	1.62594	0.53425	0.935349
2.14	2.13624	1.62954	0.53646	0.934995
2.14333	2.14465	1.63592	0.537092	0.941247
2.14667	2.15189	1.64248	0.539174	0.943758
2.15	2.15925	1.64817	0.544028	0.943482
2.15333	2.16693	1.65367	0.543692	0.944523
2.15667	2.17311	1.65967	0.544002	0.947009
2.16	2.17932	1.66413	0.548231	0.949189
2.16333	2.18605	1.66802	0.547085	0.953538
2.16667	2.19276	1.67223	0.54761	0.955207
2.17	2.20045	1.67752	0.54951	0.958722
2.17333	2.20747	1.68282	0.551788	0.964539
2.17667	2.21365	1.69044	0.552516	0.963739
2.18	2.22156	1.69792	0.555882	0.96367
2.18333	2.22841	1.70494	0.554611	0.966168
2.18667	2.23485	1.71187	0.555125	0.967904
2.19	2.2404	1.71733	0.5562	0.970003
2.19333	2.24591	1.72118	0.55619	0.97743
2.19667	2.25263	1.72559	0.559213	0.981419
2.2	2.26079	1.7316	0.56383	0.984596
2.20333	2.2683	1.73546	0.567488	0.990633
2.20667	2.27523	1.74334	0.569144	0.990451
2.21	2.28312	1.74906	0.571728	0.992731
2.21333	2.2895	1.7533	0.571778	0.99567
2.21667	2.29636	1.75831	0.574901	0.9979
2.22	2.30416	1.76534	0.57583	1.0006
2.22333	2.31102	1.76866	0.57699	1.00451
2.22667	2.31824	1.7734	0.578717	1.00664
2.23	2.32617	1.78106	0.58098	1.00844
2.23333	2.33097	1.78777	0.581403	1.0145
2.23667	2.33916	1.79347	0.585478	1.01231
2.24	2.3457	1.79907	0.588272	1.0177
2.24333	2.35408	1.80682	0.589898	1.0185
2.24667	2.36103	1.81181	0.59365	1.02155
2.25	2.36808	1.81599	0.593858	1.02296
2.25333	2.37296	1.82053	0.593105	1.02893
2.25667	2.3818	1.82583	0.596419	1.02871
2.26	2.3899	1.83073	0.59817	1.03445
2.26333	2.39681	1.8368	0.598616	1.03791
2.26667	2.40397	1.84185	0.600852	1.03788
2.27	2.41355	1.8469	0.603024	1.03977
2.27333	2.41887	1.85413	0.604597	1.04462
2.27667	2.4246	1.85957	0.606453	1.04785
2.28	2.43041	1.86421	0.607218	1.05074
2.28333	2.4382	1.86952	0.610277	1.05588
2.28667	2.44169	1.87631	0.612319	1.06141
2.29	2.44894	1.87959	0.613325	1.06512
2.29333	2.45605	1.88658	0.617087	1.06653
2.29667	2.46404	1.89273	0.617643	1.06956
2.3	2.46997	1.89815	0.618226	1.07291
2.30333	2.47986	1.905	0.618862	1.07471
2.30667	2.4862	1.91255	0.619084	1.07397
2.31	2.49386	1.91855	0.621258	1.08123
2.31333	2.50034	1.92412	0.624476	1.08013
2.31667	2.50626	1.92885	0.626074	1.08376
2.32	2.51174	1.93407	0.628346	1.08339
2.32333	2.51768	1.93937	0.632314	1.08603
2.32667	2.52319	1.94336	0.633479	1.08332
2.33	2.5306	1.94936	0.635705	1.08815
2.33333	2.537	1.95557	0.639159	1.0871
2.33667	2.54153	1.96152	0.643375	1.09186
2.34	2.54921	1.96668	0.643642	1.09653
2.34333	2.55734	1.9725	0.643378	1.0988
2.34667	2.56224	1.97771	0.645692	1.10282
2.35	2.57127	1.98406	0.645079	1.10504
2.35333	2.5806	1.98762	0.645802	1.1061
2.35667	2.58662	1.99424	0.647102	1.10595
2.36	2.59384	1.99971	0.652289	1.10927
2.36333	2.60037	2.00402	0.652938	1.11277
2.36667	2.6051	2.01002	0.656729	1.11503
2.37	2.61081	2.01579	0.656487	1.11603
2.37333	2.61945	2.02061	0.658931	1.12157
2.37667	2.62605	2.02655	0.660634	1.12245
2.38	2.6338	2.0331	0.661314	1.12377
2.38333	2.64284	2.0383	0.662181	1.12977
2.38667	2.65042	2.04759	0.665769	1.1325
2.39	2.65736	2.0537	0.665399	1.13612
2.39333	2.6625	2.05792	0.666546	1.1407
2.39667	2.66813	2.064	0.670393	1.14226
2.4	2.67343	2.06804	0.673602	1.146
2.40333	2.67867	2.07396	0.674958	1.15078
2.40667	2.68561	2.07909	0.678552	1.1512
2.41	2.69179	2.0865	0.679936	1.15465
2.41333	2.70245	2.09286	0.682259	1.15578
2.41667	2.70961	2.10002	0.68304	1.15426
2.42	2.71709	2.10434	0.684854	1.1565
2.42333	2.72265	2.11017	0.685828	1.16117
2.42667	2.72904	2.11587	0.686881	1.16331
2.43	2.73321	2.1206	0.688751	1.16932
2.43333	2.74034	2.12739	0.690506	1.17503
2.43667	2.74868	2.13207	0.69378	1.17805
2.44	2.75513	2.1391	0.698268	1.17786
2.44333	2.7631	2.14421	0.700765	1.18338
2.44667	2.77	2.14931	0.702361	1.18419
2.45	2.77646	2.15416	0.702913	1.18356
2.45333	2.78136	2.16103	0.705761	1.18705
2.45667	2.78805	2.16539	0.705318	1.188
2.46	2.7945	2.17111	0.70775	1.18915
2.46333	2.80146	2.17834	0.708903	1.19493
2.46667	2.80985	2.18142	0.712714	1.19703
2.47	2.81727	2.18619	0.712771	1.19717
2.47333	2.82462	2.19137	0.715996	1.20549
2.47667	2.83076	2.19586	0.718784	1.20742
2.48	2.83817	2.19986	0.72107	1.20905
2.48333	2.84291	2.2068	0.722124	1.21375
2.48667	2.85203	2.214	0.722277	1.2166
2.49	2.85693	2.21843	0.723186	1.21958
2.49333	2.86407	2.22636	0.72518	1.22179
2.49667	2.87014	2.23169	0.728945	1.22315
2.5	2.87687	2.2391	0.731113	1.226
2.50333	2.88195	2.24407	0.733213	1.2291
2.50667	2.8901	2.25051	0.735891	1.23167
2.51	2.89731	2.25498	0.736134	1.23456
2.51333	2.90387	2.26215	0.736003	1.23728
2.51667	2.91084	2.26717	0.738719	1.23933
2.52	2.91745	2.27196	0.741367	1.24315
2.52333	2.92216	2.27621	0.744897	1.24387
2.52667	2.92831	2.28244	0.748802	1.24724
2.53	2.93469	2.28772	0.750016	1.25069
2.53333	2.94064	2.2932	0.749868	1.25415
2.53667	2.947	2.29975	0.753188	1.2587
2.54	2.95526	2.30613	0.753005	1.25911
2.54333	2.96073	2.3116	0.754929	1.26391
2.54667	2.96984	2.31537	0.755572	1.26589
2.55	2.97754	2.32134	0.759519	1.26719
2.55333	2.98443	2.32794	0.762028	1.26761
2.55667	2.99035	2.33357	0.765481	1.2724
2.56	2.99833	2.34011	0.764285	1.2752
2.56333	3.00264	2.34652	0.767499	1.27673
2.56667	3.00806	2.35147	0.768497	1.28044
2.57	3.01571	2.35594	0.768721	1.28302
2.57333	3.02312	2.36375	0.769935	1.28721
2.57667	3.0291	2.369	0.775703	1.29224
2.58	3.03425	2.37441	0.778362	1.29691
2.58333	3.04194	2.37957	0.778445	1.30141
2.58667	3.04706	2.38576	0.781767	1.30661
2.59	3.05246	2.3898	0.783138	1.30739
2.59333	3.05967	2.39554	0.785179	1.307
2.59667	3.06733	2.40034	0.786122	1.30888
2.6	3.07231	2.40463	0.787851	1.31234
2.60333	3.07797	2.40887	0.788444	1.31287
2.60667	3.08499	2.41382	0.791544	1.31167
2.61	3.09198	2.42169	0.791459	1.31986
2.61333	3.09695	2.42772	0.792363	1.3213
2.61667	3.10441	2.43544	0.798062	1.32109
2.62	3.11255	2.4423	0.798056	1.32507
2.62333	3.11898	2.44738	0.799551	1.33091
2.62667	3.1243	2.45101	0.801806	1.32897
2.63	3.13317	2.45796	0.805168	1.33295
2.63333	3.13878	2.46454	0.804811	1.33819
2.63667	3.14425	2.46931	0.807022	1.34119
2.64	3.14924	2.47465	0.80866	1.3447
2.64333	3.15625	2.47904	0.810227	1.3502
2.64667	3.16164	2.48434	0.813173	1.35265
2.65	3.16934	2.4893	0.816068	1.35485
2.65333	3.17544	2.49427	0.820262	1.35533
2.65667	3.18412	2.50009	0.820019	1.35725
2.66	3.19004	2.50709	0.823632	1.35959
2.66333	3.19742	2.51298	0.825416	1.36371
2.66667	3.20374	2.51761	0.82609	1.36595
2.67	3.21043	2.52468	0.825952	1.36727
2.67333	3.21607	2.53116	0.828835	1.37186
2.67667	3.22172	2.53692	0.830733	1.37721
2.68	3.22737	2.54357	0.832567	1.37662
2.68333	3.23128	2.55014	0.835178	1.37922
2.68667	3.23758	2.55331	0.83672	1.38479
2.69	3.24267	2.55957	0.839847	1.38482
2.69333	3.25029	2.56515	0.839917	1.38519
2.69667	3.25837	2.57012	0.842362	1.38772
2.7	3.26407	2.57355	0.84231	1.3926
2.70333	3.27185	2.58082	0.844389	1.39417
2.70667	3.27848	2.58568	0.845372	1.39917
2.71	3.2847	2.59052	0.849594	1.4023
2.71333	3.28873	2.59718	0.849474	1.40546
2.71667	3.29708	2.60307	0.851664	1.40514
2.72	3.3025	2.60999	0.856204	1.4071
2.72333	3.31028	2.61463	0.857562	1.40792
2.72667	3.31662	2.62017	0.856676	1.40887
2.73	3.32367	2.62464	0.861823	1.41049
2.73333	3.3278	2.6302	0.862165	1.41302
2.73667	3.33201	2.63319	0.863125	1.41672
2.74	3.33761	2.64021	0.865326	1.42286
2.74333	3.34378	2.646	0.869161	1.425
2.74667	3.34917	2.65276	0.869073	1.43335
2.75	3.35496	2.65839	0.873589	1.43501
2.75333	3.36261	2.66479	0.875262	1.44065
2.75667	3.36866	2.66951	0.879164	1.43909
2.76	3.37501	2.67516	0.88001	1.44571
2.76333	3.38112	2.6802	0.879491	1.44767
2.76667	3.38753	2.68523	0.881634	1.4524
2.77	3.39447	2.69091	0.882694	1.44994
2.77333	3.39911	2.69683	0.881177	1.45302
2.77667	3.40506	2.70301	0.886139	1.45656
2.78	3.41096	2.70743	0.888064	1.45773
2.78333	3.41869	2.71445	0.8902	1.45879
2.78667	3.42437	2.71969	0.892333	1.46577
2.79	3.4316	2.72483	0.897353	1.46966
2.79333	3.43795	2.72867	0.897438	1.46717
2.79667	3.44486	2.73396	0.90034	1.47003
2.8	3.45111	2.73875	0.902476	1.4742
2.80333	3.45632	2.74449	0.902602	1.47364
2.80667	3.46115	2.75006	0.904561	1.47857
2.81	3.46543	2.75695	0.905779	1.48191
2.81333	3.47172	2.76241	0.909608	1.48472
2.81667	3.47797	2.768	0.908285	1.48549
2.82	3.48485	2.7744	0.913583	1.49093
2.82333	3.49095	2.77973	0.911983	1.49354
2.82667	3.49752	2.78515	0.91503	1.49572
2.83	3.50449	2.79027	0.915467	1.49856
2.83333	3.50815	2.79561	0.919622	1.50156
2.83667	3.51481	2.80024	0.918622	1.50296
2.84	3.52146	2.80573	0.923919	1.50511
2.84333	3.52771	2.8092	0.925662	1.51129
2.84667	3.53233	2.81453	0.928735	1.51363
2.85	3.53997	2.82128	0.928955	1.51572
2.85333	3.54535	2.82686	0.932897	1.51934
2.85667	3.55146	2.83289	0.93308	1.52034
2.86	3.55841	2.83942	0.936045	1.52169
2.86333	3.56442	2.84705	0.936415	1.52413
2.86667	3.57063	2.85133	0.939993	1.52956
2.87	3.5765	2.8569	0.940475	1.53066
2.87333	3.58183	2.86222	0.943843	1.53548
2.87667	3.58647	2.86797	0.948119	1.5382
2.88	3.59302	2.87147	0.94994	1.54055
2.88333	3.59816	2.87625	0.953034	1.54415
2.88667	3.6058	2.88436	0.957412	1.54809
2.89	3.61109	2.88966	0.956898	1.54891
2.89333	3.61677	2.8949	0.958519	1.55033
2.89667	3.62039	2.90179	0.962204	1.55175
2.9	3.62695	2.90827	0.96136	1.55463
2.90333	3.63011	2.91096	0.962554	1.55413
2.90667	3.6354	2.91578	0.965898	1.55814
2.91	3.64287	2.92089	0.966583	1.56164
2.91333	3.64928	2.92561	0.966738	1.56511
2.91667	3.65406	2.93078	0.969541	1.56553
2.92	3.66112	2.93683	0.972982	1.57132
2.92333	3.66708	2.94156	0.973788	1.57263
2.92667	3.67199	2.94701	0.975707	1.57793
2.93	3.68007	2.95237	0.978916	1.5788
2.93333	3.68676	2.95623	0.982491	1.58238
2.93667	3.69197	2.96034	0.980568	1.58638
2.94	3.69859	2.96592	0.984952	1.59232
2.94333	3.70521	2.97277	0.985178	1.59544
2.94667	3.7094	2.9776	0.985036	1.59991
2.95	3.71366	2.98439	0.984841	1.60021
2.95333	3.72035	2.98902	0.987042	1.60326
2.95667	3.72449	2.99576	0.985343	1.60064
2.96	3.73142	3.00123	0.985928	1.60065
2.96333	3.73712	3.00593	0.989118	1.60479
2.96667	3.74473	3.01187	0.991904	1.60913
2.97	3.74997	3.018	0.993773	1.61012
2.97333	3.75697	3.02223	0.995842	1.61208
2.97667	3.75995	3.0269	0.998137	1.61472
2.98	3.76634	3.03278	1.00088	1.61378
2.98333	3.77187	3.03701	1.00288	1.61589
2.98667	3.7769	3.04302	1.00466	1.61862
2.99	3.78436	3.04898	1.00835	1.62557
2.99333	3.79069	3.05444	1.01189	1.62838
2.99667	3.79379	3.06058	1.01326	1.63557
3	3.79927	3.06558	1.01618	1.63728
3.00333	3.80545	3.07076	1.01899	1.63928
3.00667	3.80967	3.07366	1.01901	1.63896
3.01	3.81425	3.07995	1.02096	1.64379
3.01333	3.82088	3.0853	1.02417	1.64348
3.01667	3.82543	3.09029	1.02298	1.64705
3.02	3.82976	3.09538	1.02508	1.65141
3.02333	3.83416	3.10321	1.02922	1.65197
3.02667	3.84181	3.10721	1.02912	1.65437
3.03	3.84731	3.11069	1.03191	1.65712
3.03333	3.85423	3.11655	1.03273	1.66071
3.03667	3.85907	3.12261	1.03525	1.65754
3.04	3.86363	3.12728	1.0353	1.6622
3.04333	3.86975	3.13467	1.03944	1.66714
3.04667	3.87539	3.1404	1.03916	1.66954
3.05	3.88006	3.14716	1.04408	1.67148
3.05333	3.88694	3.15202	1.04445	1.67922
3.05667	3.89351	3.15658	1.04639	1.68241
3.06	3.89742	3.16087	1.0481	1.67999
3.06333	3.90188	3.16668	1.05002	1.68278
3.06667	3.90704	3.17124	1.05273	1.68699
3.07	3.9131	3.1766	1.05331	1.68535
3.07333	3.91801	3.18322	1.05718	1.69053
3.07667	3.92404	3.18829	1.05708	1.69147
3.08	3.92985	3.19361	1.05995	1.69815
3.08333	3.93415	3.19783	1.05973	1.69835
3.08667	3.93841	3.20237	1.06444	1.70379
3.09	3.94535	3.2064	1.06542	1.70715
3.09333	3.94896	3.21125	1.06879	1.71212
3.09667	3.95501	3.21721	1.07159	1.71415
3.1	3.96152	3.22132	1.07308	1.71709
3.10333	3.96753	3.22585	1.07497	1.71777
3.10667	3.97287	3.23031	1.07592	1.7163
3.11	3.97877	3.23526	1.07706	1.71888
3.11333	3.98466	3.24098	1.07865	1.7183
3.11667	3.9909	3.24722	1.07997	1.71985
3.12	3.99648	3.25597	1.08096	1.7254
3.12333	4.00052	3.26194	1.08547	1.72781
3.12667	4.00664	3.26583	1.08884	1.73033
3.13	4.01217	3.26859	1.09149	1.73374
3.13333	4.01527	3.27416	1.0961	1.73799
3.13667	4.02018	3.27755	1.0964	1.73821
3.14	4.02583	3.28342	1.09588	1.74134
3.14333	4.03148	3.28739	1.09622	1.74354
3.14667	4.03558	3.29467	1.09616	1.74747
3.15	4.04345	3.29953	1.0964	1.75225
3.15333	4.04752	3.30388	1.09799	1.75676
3.15667	4.05243	3.30857	1.10035	1.76013
3.16	4.05573	3.31506	1.10221	1.7647
3.16333	4.0595	3.31883	1.10528	1.76619
3.16667	4.06323	3.32292	1.10644	1.76645
3.17	4.06913	3.32829	1.10973	1.76767
3.17333	4.07412	3.33346	1.10999	1.77122
3.17667	4.08067	3.33907	1.11262	1.77403
3.18	4.08589	3.34472	1.11428	1.77975
3.18333	4.09018	3.34978	1.11744	1.78168
3.18667	4.09446	3.35408	1.11928	1.78452
3.19	4.09852	3.3596	1.12445	1.78584
3.19333	4.10297	3.36354	1.12759	1.78766
3.19667	4.10772	3.36976	1.13125	1.78829
3.2	4.11379	3.37403	1.13417	1.78947
3.20333	4.11821	3.37985	1.13497	1.7935
3.20667	4.1234	3.38366	1.13787	1.79486
3.21	4.13005	3.38988	1.13805	1.79641
3.21333	4.13409	3.39289	1.14004	1.80114
3.21667	4.1398	3.39963	1.13903	1.80693
3.22	4.14434	3.40351	1.1438	1.8092
3.22333	4.14943	3.409	1.14166	1.81111
3.22667	4.15252	3.41352	1.14606	1.81302
3.23	4.16088	3.42013	1.14535	1.81679
3.23333	4.16534	3.42564	1.15134	1.82068
3.23667	4.17195	3.43204	1.15343	1.82497
3.24	4.17833	3.43798	1.15732	1.82755
3.24333	4.18434	3.44191	1.156	1.83104
3.24667	4.18816	3.44797	1.15844	1.83089
3.25	4.19265	3.4524	1.15736	1.83151
3.25333	4.19772	3.45608	1.15858	1.83074
3.25667	4.20183	3.46129	1.15945	1.83392
3.26	4.20645	3.46765	1.16195	1.83637
3.26333	4.21173	3.47096	1.16521	1.83995
3.26667	4.21907	3.47534	1.16699	1.84379
3.27	4.22096	3.47943	1.16684	1.84447
3.27333	4.22561	3.48272	1.16819	1.8496
3.27667	4.23153	3.48729	1.16982	1.85251
3.28	4.23553	3.49185	1.17222	1.85465
3.28333	4.23857	3.49692	1.17443	1.85629
3.28667	4.24595	3.50322	1.17889	1.86103
3.29	4.25088	3.50843	1.1807	1.86026
3.29333	4.25413	3.51278	1.18251	1.86087
3.29667	4.25901	3.51746	1.18483	1.86349
3.3	4.26484	3.52393	1.18657	1.86339
3.30333	4.26928	3.5287	1.18785	1.8652
3.30667	4.27385	3.53456	1.19004	1.8699
3.31	4.28007	3.53916	1.19454	1.87591
3.31333	4.28496	3.54304	1.19555	1.87769
3.31667	4.28926	3.54421	1.2003	1.88234
3.32	4.2943	3.55063	1.19792	1.88617
3.32333	4.29825	3.55534	1.2006	1.88956
3.32667	4.30086	3.56125	1.19972	1.89001
3.33	4.30614	3.56648	1.20067	1.89404
3.33333	4.31078	3.5736	1.20173	1.89893
3.33667	4.31559	3.57677	1.207	1.89954
3.34	4.32061	3.58164	1.20799	1.8995
3.34333	4.32538	3.58671	1.20955	1.90471
3.34667	4.32916	3.59289	1.21555	1.90549
3.35	4.33363	3.59708	1.21629	1.90777
3.35333	4.33883	3.60209	1.21825	1.91072
3.35667	4.34373	3.60668	1.22039	1.91721
3.36	4.34952	3.60937	1.22338	1.91849
3.36333	4.35394	3.6143	1.22025	1.9222
3.36667	4.35866	3.61897	1.22342	1.91925
3.37	4.36327	3.6226	1.22535	1.92218
3.37333	4.36768	3.62733	1.22828	1.9221
3.37667	4.37188	3.63203	1.22851	1.92353
3.38	4.37765	3.6379	1.23367	1.92697
3.38333	4.37994	3.64322	1.23316	1.93082
3.38667	4.38403	3.64871	1.23375	1.93138
3.39	4.38845	3.6528	1.23406	1.93712
3.39333	4.3929	3.65908	1.23722	1.93807
3.39667	4.39705	3.66313	1.23836	1.93789
3.4	4.40446	3.66717	1.2415	1.94118
3.40333	4.4097	3.67269	1.24517	1.94685
3.40667	4.41368	3.67809	1.24911	1.94402
3.41	4.41809	3.68232	1.25136	1.95055
3.41333	4.42184	3.68704	1.25526	1.95469
3.41667	4.4252	3.69247	1.2556	1.95956
3.42	4.42926	3.69652	1.25762	1.96138
3.42333	4.43457	3.70153	1.25803	1.96611
3.42667	4.44005	3.70571	1.2615	1.96453
3.43	4.44485	3.71066	1.2594	1.97055
3.43333	4.45043	3.71534	1.26411	1.9693
3.43667	4.45302	3.71913	1.26297	1.97101
3.44	4.45726	3.7231	1.26377	1.97493
3.44333	4.46128	3.72795	1.26261	1.97622
3.44667	4.46665	3.73414	1.26826	1.97762
3.45	4.47055	3.73787	1.26869	1.98016
3.45333	4.47685	3.74438	1.27082	1.9819
3.45667	4.47998	3.74979	1.27535	1.98315
3.46	4.4828	3.75463	1.28141	1.9877
3.46333	4.48545	3.75708	1.28261	1.99045
3.46667	4.49125	3.76081	1.28387	1.99347
3.47	4.4945	3.76472	1.28692	1.9975
3.47333	4.50006	3.7685	1.28829	2.00004
3.47667	4.50641	3.77371	1.28858	2.00286
3.48	4.51036	3.77678	1.291	2.00478
3.48333	4.51316	3.78199	1.29239	2.00721
3.48667	4.51683	3.78725	1.29461	2.00994
3.49	4.52273	3.79178	1.29495	2.0107
3.49333	4.52619	3.79555	1.29761	2.01423
3.49667	4.53156	3.80244	1.29871	2.01479
3.5	4.53699	3.80767	1.30061	2.02026
3.50333	4.54104	3.81102	1.3042	2.02195
3.50667	4.54441	3.81631	1.30813	2.02684
3.51	4.54778	3.82008	1.30714	2.02606
3.51333	4.55046	3.82531	1.30835	2.0286
3.51667	4.55398	3.83106	1.31218	2.02833
3.52	4.55873	3.8368	1.3111	2.0292
3.52333	4.56155	3.8413	1.31208	2.02775
3.52667	4.56692	3.84696	1.31631	2.03357
3.53	4.57115	3.85137	1.31625	2.03851
3.53333	4.57533	3.85426	1.31661	2.0407
3.53667	4.57998	3.85933	1.31829	2.04668
3.54	4.58358	3.86319	1.3188	2.05068
3.54333	4.5863	3.86728	1.31867	2.05272
3.54667	4.59189	3.86997	1.32304	2.0542
3.55	4.59667	3.87435	1.3228	2.05605
3.55333	4.6011	3.87864	1.32717	2.05766
3.55667	4.60674	3.88358	1.32936	2.05986
3.56	4.61208	3.88869	1.33226	2.06157
3.56333	4.61525	3.89339	1.33305	2.0675
3.56667	4.6186	3.89794	1.33913	2.07136
3.57	4.62261	3.90097	1.33891	2.07088
3.57333	4.62569	3.90586	1.33973	2.07459
3.57667	4.62922	3.9103	1.34119	2.07439
3.58	4.63355	3.91729	1.344	2.07485
3.58333	4.63772	3.92152	1.34279	2.07806
3.58667	4.64127	3.92792	1.34696	2.08466
3.59	4.64547	3.9312	1.34963	2.08872
3.59333	4.64836	3.93454	1.34978	2.09194
3.59667	4.65094	3.93849	1.35252	2.0909
3.6	4.65485	3.9426	1.35593	2.09341
3.60333	4.66044	3.94586	1.35423	2.0934
3.60667	4.66309	3.95019	1.35566	2.09272
3.61	4.66766	3.95376	1.35829	2.09642
3.61333	4.6737	3.95692	1.36118	2.10074
3.61667	4.67741	3.9625	1.35977	2.10372
3.62	4.67981	3.96801	1.36389	2.10394
3.62333	4.68394	3.97326	1.36629	2.10923
3.62667	4.68711	3.97866	1.36789	2.10978
3.63	4.69009	3.98537	1.36931	2.11136
3.63333	4.69399	3.9878	1.37344	2.11018
3.63667	4.69764	3.99137	1.37501	2.11324
3.64	4.70245	3.99577	1.37744	2.11396
3.64333	4.70937	4.00026	1.37755	2.11645
3.64667	4.71188	4.00268	1.37715	2.11838
3.65	4.7157	4.00937	1.38147	2.12102
3.65333	4.72052	4.01386	1.38182	2.12285
3.65667	4.72277	4.01923	1.38384	2.12602
3.66	4.72554	4.02419	1.38723	2.13135
3.66333	4.73157	4.02949	1.39118	2.13582
3.66667	4.73508	4.03065	1.39137	2.14276
3.67	4.73919	4.03416	1.39591	2.14894
3.67333	4.74374	4.03705	1.39862	2.15145
3.67667	4.74703	4.03951	1.39993	2.15346
3.68	4.75049	4.04399	1.39949	2.15391
3.68333	4.75554	4.04971	1.39902	2.15172
3.68667	4.75866	4.05425	1.39965	2.1524
3.69	4.76245	4.05823	1.40055	2.15323
3.69333	4.766	4.06434	1.40246	2.15247
3.69667	4.76808	4.06915	1.40461	2.15609
3.7	4.77138	4.07369	1.40749	2.16209
3.70333	4.77377	4.07783	1.4075	2.16557
3.70667	4.77905	4.08174	1.40684	2.16625
3.71	4.78301	4.08548	1.40963	2.17035
3.71333	4.78804	4.08856	1.41258	2.17431
3.71667	4.7908	4.09375	1.41352	2.17516
3.72	4.79519	4.09838	1.41693	2.17401
3.72333	4.79777	4.102	1.42091	2.17575
3.72667	4.80182	4.10647	1.42132	2.17983
3.73	4.80556	4.11096	1.42406	2.17966
3.73333	4.81119	4.1164	1.42602	2.18117
3.73667	4.81646	4.12155	1.42821	2.18445
3.74	4.82051	4.12674	1.43069	2.18719
3.74333	4.82394	4.13113	1.43343	2.18796
3.74667	4.82663	4.13222	1.43699	2.19461
3.75	4.82925	4.13653	1.44059	2.19403
3.75333	4.83311	4.13842	1.4409	2.19763
3.75667	4.83614	4.14265	1.43999	2.20226
3.76	4.83982	4.14731	1.44114	2.20344
3.76333	4.84351	4.15309	1.44173	2.20529
3.76667	4.84706	4.15638	1.44204	2.21158
3.77	4.84999	4.16249	1.44554	2.21183
3.77333	4.85288	4.16578	1.448	2.21671
3.77667	4.85611	4.16894	1.4522	2.22167
3.78	4.85979	4.17349	1.45252	2.22037
3.78333	4.86243	4.17662	1.45432	2.22166
3.78667	4.86549	4.18026	1.45443	2.22355
3.79	4.86932	4.18369	1.45814	2.22514
3.79333	4.87162	4.18711	1.4559	2.22362
3.79667	4.8756	4.19079	1.45816	2.22855
3.8	4.88001	4.19548	1.46094	2.23181
3.80333	4.8841	4.19911	1.46258	2.23936
3.80667	4.88795	4.2044	1.46215	2.24025
3.81	4.89395	4.2089	1.46634	2.24588
3.81333	4.89603	4.21358	1.46839	2.24823
3.81667	4.89935	4.21584	1.47012	2.24839
3.82	4.90204	4.22068	1.47237	2.24505
3.82333	4.90529	4.2249	1.47574	2.24652
3.82667	4.90672	4.22982	1.47885	2.24856
3.83	4.91014	4.23256	1.48085	2.24817
3.83333	4.91324	4.23764	1.48397	2.25367
3.83667	4.91665	4.24183	1.48737	2.25731
3.84	4.92066	4.24457	1.48933	2.25683
3.84333	4.92297	4.24868	1.49182	2.25779
3.84667	4.92796	4.25499	1.49345	2.26259
3.85	4.93161	4.25934	1.49309	2.26396
3.85333	4.93507	4.26144	1.4948	2.26606
3.85667	4.9352	4.26824	1.49538	2.26864
3.86	4.94165	4.2717	1.49246	2.27094
3.86333	4.94329	4.27648	1.49469	2.27252
3.86667	4.94526	4.27943	1.4995	2.2774
3.87	4.94871	4.28433	1.49865	2.28135
3.87333	4.95395	4.28623	1.49915	2.28319
3.87667	4.95588	4.29142	1.50496	2.28526
3.88	4.95875	4.2939	1.50686	2.28697
3.88333	4.96328	4.29851	1.50509	2.28811
3.88667	4.9656	4.30316	1.50838	2.28861
3.89	4.96886	4.30581	1.511	2.29518
3.89333	4.97199	4.30769	1.51145	2.29504
3.89667	4.97829	4.31058	1.51404	2.29741
3.9	4.98211	4.31438	1.51845	2.29847
3.90333	4.98503	4.31773	1.52085	2.30091
3.90667	4.98758	4.32131	1.52327	2.29909
3.91	4.99095	4.32644	1.52466	2.30514
3.91333	4.99206	4.33183	1.52827	2.30876
3.91667	4.99494	4.33631	1.52966	2.30996
3.92	5.00011	4.33922	1.53133	2.31341
3.92333	5.00475	4.34389	1.53222	2.31794
3.92667	5.00735	4.34495	1.53382	2.31789
3.93	5.00965	4.34728	1.53062	2.31913
3.93333	5.01302	4.35135	1.53174	2.32423
3.93667	5.01529	4.35523	1.53234	2.32506
3.94	5.01617	4.3602	1.53483	2.32909
3.94333	5.01986	4.36495	1.53826	2.33067
3.94667	5.02446	4.36979	1.54179	2.33126
3.95	5.02713	4.37413	1.5445	2.33432
3.95333	5.02744	4.37658	1.54665	2.33512
3.95667	5.03312	4.38085	1.54985	2.33389
3.96	5.03502	4.38628	1.55128	2.33954
3.96333	5.0382	4.38935	1.55407	2.34199
3.96667	5.04131	4.3914	1.5562	2.34307
3.97	5.04686	4.39772	1.5576	2.34916
3.97333	5.05083	4.39858	1.55735	2.35294
3.97667	5.05447	4.40149	1.55841	2.35144
3.98	5.05639	4.40506	1.56044	2.35403
3.98333	5.05905	4.40963	1.56049	2.35647
3.98667	5.06285	4.41173	1.56293	2.35604
3.99	5.06401	4.41797	1.56659	2.35445
3.99333	5.06615	4.42172	1.5672	2.35671
3.99667	5.06842	4.42742	1.56742	2.35736
4	5.07149	4.43261	1.57358	2.35652
4.00333	5.07348	4.43786	1.5727	2.35921
4.00667	5.07635	4.44256	1.57448	2.36339
4.01	5.08245	4.44659	1.57811	2.36922
4.01333	5.08622	4.44841	1.58058	2.37127
4.01667	5.08869	4.45015	1.5774	2.37431
4.02	5.09276	4.45253	1.5827	2.37856
4.02333	5.09555	4.45494	1.58352	2.38318
4.02667	5.0961	4.45816	1.58499	2.38124
4.03	5.09863	4.46184	1.58547	2.38471
4.03333	5.10166	4.46768	1.59089	2.39139
4.03667	5.10411	4.47121	1.59077	2.39168
4.04	5.10772	4.475	1.59054	2.38942
4.04333	5.11143	4.47816	1.59097	2.3922
4.04667	5.11214	4.48344	1.59201	2.39727
4.05	5.11498	4.48575	1.59177	2.39487
4.05333	5.11654	4.49084	1.59287	2.39783
4.05667	5.12114	4.49415	1.59748	2.40136
4.06	5.12326	4.49992	1.60115	2.40541
4.06333	5.12968	4.50391	1.6036	2.40381
4.06667	5.13353	4.50787	1.60675	2.40977
4.07	5.13674	4.51081	1.60981	2.41109
4.07333	5.13825	4.51303	1.6093	2.41529
4.07667	5.14053	4.51514	1.60986	2.41644
4.08	5.14213	4.51729	1.61263	2.42089
4.08333	5.14488	4.52068	1.61265	2.41794
4.08667	5.14918	4.52463	1.61575	2.42003
4.09	5.14967	4.5288	1.61762	2.42017
4.09333	5.15377	4.53475	1.62109	2.4234
4.09667	5.15562	4.53685	1.62157	2.4256
4.1	5.15766	4.53988	1.62396	2.43105
4.10333	5.15973	4.5428	1.62371	2.43354
4.10667	5.16267	4.54707	1.62735	2.43464
4.11	5.16528	4.5492	1.6263	2.4368
4.11333	5.17047	4.55512	1.63137	2.43744
4.11667	5.17285	4.55824	1.6323	2.43956
4.12	5.17546	4.56104	1.63375	2.43938
4.12333	5.18025	4.56461	1.63575	2.44281
4.12667	5.18363	4.56745	1.63834	2.44257
4.13	5.1864	4.5689	1.63703	2.4469
4.13333	5.18835	4.57285	1.64023	2.4486
4.13667	5.19158	4.57715	1.64097	2.45009
4.14	5.19223	4.5796	1.64117	2.45417
4.14333	5.19413	4.58322	1.6431	2.45608
4.14667	5.19367	4.58816	1.64821	2.45461
4.15	5.19831	4.59201	1.65037	2.45674
4.15333	5.19912	4.59558	1.65181	2.461
4.15667	5.2034	4.59946	1.65457	2.4626
4.16	5.20566	4.60346	1.65561	2.46402
4.16333	5.21072	4.60677	1.65453	2.47032
4.16667	5.2128	4.60781	1.65388	2.47075
4.17	5.21691	4.61239	1.65623	2.47301
4.17333	5.21945	4.6162	1.65744	2.47266
4.17667	5.22183	4.61812	1.65815	2.47757
4.18	5.2248	4.62064	1.65845	2.47629
4.18333	5.22787	4.62686	1.66371	2.47885
4.18667	5.23008	4.62917	1.66513	2.47935
4.19	5.23347	4.63342	1.66429	2.4833
4.19333	5.23596	4.63796	1.6662	2.48474
4.19667	5.23916	4.64212	1.66931	2.48576
4.2	5.24143	4.64348	1.6717	2.49162
4.20333	5.24371	4.64726	1.67528	2.49206
4.20667	5.245	4.6484	1.67878	2.49504
4.21	5.24708	4.6507	1.68133	2.49431
4.21333	5.24674	4.65413	1.68453	2.49981
4.21667	5.24909	4.65874	1.68252	2.49919
4.22	5.25385	4.66134	1.68478	2.5039
4.22333	5.25583	4.66627	1.68627	2.50355
4.22667	5.25864	4.67087	1.6874	2.51099
4.23	5.26319	4.67383	1.68687	2.50878
4.23333	5.2656	4.67652	1.69	2.51127
4.23667	5.26662	4.6796	1.69173	2.51578
4.24	5.26923	4.68351	1.69205	2.52015
4.24333	5.27343	4.68669	1.69576	2.51814
4.24667	5.27492	4.68801	1.6957	2.5216
4.25	5.27833	4.69304	1.6998	2.52647
4.25333	5.28051	4.69566	1.69826	2.52342
4.25667	5.28277	4.69883	1.7018	2.52729
4.26	5.28383	4.702	1.70174	2.52852
4.26333	5.28752	4.70797	1.70667	2.53372
4.26667	5.28871	4.71121	1.70625	2.53263
4.27	5.29225	4.71579	1.70906	2.53816
4.27333	5.29602	4.71635	1.71094	2.53764
4.27667	5.29656	4.72041	1.71258	2.53876
4.28	5.29925	4.72427	1.71247	2.53757
4.28333	5.30314	4.72585	1.71409	2.54141
4.28667	5.30445	4.72897	1.71552	2.54381
4.29	5.30641	4.73487	1.71737	2.54791
4.29333	5.31086	4.7364	1.71936	2.55161
4.29667	5.31357	4.73754	1.72233	2.55268
4.3	5.31559	4.73972	1.72343	2.55717
4.30333	5.31734	4.74215	1.72684	2.55664
4.30667	5.31825	4.74631	1.72698	2.55352
4.31	5.32082	4.7501	1.72963	2.55435
4.31333	5.31974	4.75489	1.72833	2.55982
4.31667	5.32126	4.75952	1.73165	2.55959
4.32	5.32257	4.76319	1.73154	2.56112
4.32333	5.32764	4.76595	1.73409	2.56747
4.32667	5.33038	4.7686	1.73328	2.56972
4.33	5.3347	4.7711	1.736	2.56986
4.33333	5.33714	4.77508	1.73645	2.57251
4.33667	5.34109	4.77984	1.73886	2.57673
4.34	5.34133	4.78168	1.74005	2.5744
4.34333	5.34326	4.78355	1.74268	2.57909
4.34667	5.34528	4.78753	1.74566	2.58137
4.35	5.34832	4.7908	1.74905	2.581
4.35333	5.34969	4.7922	1.75055	2.58087
4.35667	5.35333	4.79507	1.75083	2.58544
4.36	5.35514	4.79879	1.75393	2.58709
4.36333	5.35754	4.80166	1.75448	2.58831
4.36667	5.36031	4.80466	1.7552	2.59191
4.37	5.363	4.80721	1.75835	2.59426
4.37333	5.36406	4.81003	1.76251	2.59579
4.37667	5.36617	4.8131	1.76463	2.59647
4.38	5.3691	4.81669	1.7673	2.60008
4.38333	5.37161	4.81935	1.77016	2.60086
4.38667	5.37501	4.82325	1.77056	2.60345
4.39	5.37846	4.82507	1.77061	2.60932
4.39333	5.38122	4.82936	1.77086	2.61372
4.39667	5.38341	4.83144	1.77435	2.61298
4.4	5.38506	4.83448	1.77328	2.61559
4.40333	5.38623	4.83753	1.77515	2.61943
4.40667	5.3879	4.84226	1.78	2.61628
4.41	5.38949	4.84527	1.78187	2.61739
4.41333	5.39136	4.84921	1.78041	2.62387
4.41667	5.39293	4.84999	1.78329	2.62628
4.42	5.39393	4.85279	1.7858	2.62626
4.42333	5.39674	4.85621	1.78327	2.63248
4.42667	5.39909	4.85752	1.78556	2.63179
4.43	5.40163	4.86045	1.78751	2.63056
4.43333	5.40453	4.86432	1.78768	2.63301
4.43667	5.40769	4.86714	1.78922	2.63394
4.44	5.40946	4.86978	1.7908	2.63223
4.44333	5.41289	4.87174	1.79059	2.63581
4.44667	5.41394	4.87475	1.79333	2.63631
4.45	5.41494	4.87925	1.79574	2.63804
4.45333	5.41706	4.88146	1.79533	2.64246
4.45667	5.41913	4.88377	1.79841	2.64302
4.46	5.42163	4.88845	1.80015	2.6427
4.46333	5.42494	4.89041	1.80188	2.64428
4.46667	5.42757	4.89403	1.80315	2.64461
4.47	5.42976	4.89755	1.80579	2.64346
4.47333	5.43099	4.90023	1.80896	2.64781
4.47667	5.43238	4.90463	1.81171	2.65014
4.48	5.43344	4.90882	1.81364	2.6567
4.48333	5.43605	4.90968	1.81676	2.66208
4.48667	5.43963	4.91429	1.81676	2.66618
4.49	5.44277	4.91616	1.81778	2.66596
4.49333	5.44396	4.91834	1.81998	2.66854
4.49667	5.44862	4.92089	1.82153	2.66951
4.5	5.45091	4.92553	1.8234	2.6727
4.50333	5.4514	4.92693	1.82598	2.67194
4.50667	5.45255	4.93082	1.82875	2.67534
4.51	5.45598	4.93365	1.83061	2.67818
4.51333	5.45634	4.93445	1.83359	2.67785
4.51667	5.4578	4.9351	1.83593	2.67849
4.52	5.45818	4.93946	1.83606	2.68358
4.52333	5.46152	4.94171	1.8371	2.68551
4.52667	5.46275	4.944	1.83743	2.68897
4.53	5.46534	4.94742	1.83773	2.68995
4.53333	5.46761	4.95052	1.83733	2.69241
4.53667	5.47195	4.95143	1.84166	2.69195
4.54	5.4733	4.95412	1.83981	2.69667
4.54333	5.47357	4.95644	1.84296	2.69454
4.54667	5.47472	4.96146	1.84282	2.69718
4.55	5.47512	4.96322	1.84652	2.69946
4.55333	5.47656	4.96797	1.8454	2.70046
4.55667	5.4777	4.97005	1.84951	2.69812
4.56	5.48261	4.9733	1.84758	2.70065
4.56333	5.4841	4.97439	1.84919	2.70198
4.56667	5.4867	4.9801	1.85035	2.7014
4.57	5.48921	4.98217	1.85371	2.70816
4.57333	5.49101	4.98609	1.85386	2.71297
4.57667	5.49086	4.98842	1.85732	2.71741
4.58	5.49372	4.99282	1.86079	2.71906
4.58333	5.49498	4.99441	1.86177	2.72045
4.58667	5.49823	4.99647	1.86278	2.71865
4.59	5.50207	5.00098	1.86462	2.71822
4.59333	5.50318	5.00425	1.86617	2.72054
4.59667	5.50484	5.00534	1.86754	2.7234
4.6	5.50977	5.00711	1.86918	2.72592
4.60333	5.50926	5.00976	1.87083	2.72809
4.60667	5.51228	5.01018	1.87499	2.72967
4.61	5.5156	5.01403	1.87371	2.7312
4.61333	5.52031	5.01656	1.87507	2.73361
4.61667	5.52088	5.02225	1.87912	2.73366
4.62	5.52557	5.02482	1.87971	2.73679
4.62333	5.52659	5.02883	1.87943	2.73869
4.62667	5.53013	5.03014	1.88309	2.74167
4.63	5.53088	5.03357	1.88405	2.74203
4.63333	5.53371	5.03385	1.88375	2.74623
4.63667	5.53314	5.03762	1.88569	2.74987
4.64	5.53419	5.03812	1.88416	2.751
4.64333	5.53468	5.04162	1.88474	2.75241
4.64667	5.53443	5.04518	1.88522	2.75618
4.65	5.5354	5.0488	1.88772	2.75456
4.65333	5.53891	5.05164	1.88966	2.7564
4.65667	5.54105	5.05603	1.89267	2.75775
4.66	5.54229	5.05675	1.89568	2.7583
4.66333	5.54675	5.05853	1.89705	2.75882
4.66667	5.54854	5.05883	1.89699	2.76196
4.67	5.54989	5.06118	1.89801	2.76321
4.67333	5.55165	5.06384	1.89874	2.76505
4.67667	5.55361	5.06693	1.90018	2.76871
4.68	5.55522	5.06785	1.90229	2.7686
4.68333	5.55815	5.0729	1.903	2.77368
4.68667	5.56028	5.0741	1.90805	2.77592
4.69	5.56209	5.07681	1.91232	2.7786
4.69333	5.56456	5.08093	1.91218	2.77719
4.69667	5.56561	5.08288	1.91483	2.78147
4.7	5.56718	5.08456	1.9177	2.78305
4.70333	5.56997	5.08814	1.91546	2.78329
4.70667	5.57286	5.09022	1.91427	2.78336
4.71	5.57489	5.09177	1.91869	2.78498
4.71333	5.57744	5.09627	1.91663	2.78847
4.71667	5.57831	5.09799	1.91836	2.78752
4.72	5.57859	5.10102	1.92187	2.7883
4.72333	5.58032	5.10404	1.92336	2.79408
4.72667	5.58069	5.10747	1.92208	2.79492
4.73	5.58229	5.1089	1.92567	2.79641
4.73333	5.58474	5.11269	1.92727	2.80113
4.73667	5.58798	5.11519	1.92615	2.80101
4.74	5.58982	5.11661	1.92982	2.80284
4.74333	5.59319	5.11849	1.9333	2.80517
4.74667	5.5947	5.12019	1.93242	2.80587
4.75	5.59683	5.1228	1.93507	2.80689
4.75333	5.59704	5.12345	1.93626	2.81079
4.75667	5.59778	5.12623	1.93789	2.81092
4.76	5.59863	5.12935	1.93751	2.81284
4.76333	5.59995	5.13377	1.94001	2.81609
4.76667	5.60203	5.13583	1.93907	2.81619
4.77	5.6056	5.1404	1.94369	2.81982
4.77333	5.60833	5.14382	1.94127	2.82271
4.77667	5.61064	5.14643	1.94268	2.82816
4.78	5.6118	5.14875	1.94625	2.82535
4.78333	5.61386	5.15113	1.94557	2.82809
4.78667	5.61526	5.15097	1.94707	2.83144
4.79	5.61733	5.15233	1.95041	2.82996
4.79333	5.61906	5.15307	1.95055	2.83087
4.79667	5.62207	5.15555	1.9491	2.83511
4.8	5.62452	5.15844	1.95474	2.83653
4.80333	5.62692	5.16184	1.95511	2.83775
4.80667	5.62799	5.16473	1.95582	2.8406
4.81	5.63034	5.16842	1.9591	2.84116
4.81333	5.63219	5.17129	1.96347	2.84364
4.81667	5.63256	5.17226	1.96156	2.84405
4.82	5.63304	5.1748	1.96456	2.84475
4.82333	5.63529	5.17676	1.96635	2.84959
4.82667	5.63734	5.17838	1.9662	2.84992
4.83	5.63974	5.17815	1.96611	2.84901
4.83333	5.64094	5.18139	1.96724	2.85199
4.83667	5.64376	5.18283	1.96632	2.85298
4.84	5.64536	5.18611	1.96911	2.85059
4.84333	5.64581	5.18747	1.97283	2.85488
4.84667	5.647	5.19099	1.97276	2.85721
4.85	5.64929	5.19404	1.97662	2.86176
4.85333	5.64872	5.19727	1.97815	2.86345
4.85667	5.65007	5.19897	1.97966	2.87176
4.86	5.65112	5.20168	1.97808	2.87436
4.86333	5.65195	5.20374	1.98005	2.87675
4.86667	5.65498	5.20523	1.98071	2.87458
4.87	5.65627	5.20739	1.98309	2.87547
4.87333	5.65909	5.2076	1.98165	2.87097
4.87667	5.66188	5.21103	1.98617	2.86897
4.88	5.66343	5.2143	1.98681	2.87214
4.88333	5.66427	5.21658	1.98853	2.87689
4.88667	5.66786	5.21871	1.98812	2.87945
4.89	5.66723	5.22293	1.99111	2.88132
4.89333	5.6705	5.22521	1.99122	2.88562
4.89667	5.67383	5.22637	1.99553	2.88626
4.9	5.67418	5.228	1.99451	2.88725
4.90333	5.6758	5.23245	1.99972	2.88961
4.90667	5.67826	5.23314	1.99976	2.89184
4.91	5.67894	5.23399	1.99879	2.89408
4.91333	5.68109	5.23702	1.99986	2.89656
4.91667	5.68333	5.23966	2.00237	2.89498
4.92	5.68494	5.2406	2.00416	2.89895
4.92333	5.68757	5.24259	2.00798	2.90264
4.92667	5.68869	5.24407	2.0113	2.90009
4.93	5.6892	5.2487	2.01373	2.89982
4.93333	5.6916	5.25224	2.0174	2.90659
4.93667	5.69226	5.25402	2.01546	2.90744
4.94	5.69291	5.25748	2.01774	2.90512
4.94333	5.6951	5.26231	2.02008	2.90741
4.94667	5.69635	5.26319	2.0196	2.90936
4.95	5.69755	5.26432	2.01783	2.91113
4.95333	5.70105	5.26531	2.01904	2.91344
4.95667	5.70341	5.26612	2.02119	2.91538
4.96	5.70424	5.26837	2.02252	2.91771
4.96333	5.70474	5.26943	2.02223	2.92372
4.96667	5.70579	5.27273	2.02605	2.92098
4.97	5.70651	5.27499	2.02949	2.91986
4.97333	5.70865	5.27835	2.02974	2.92604
4.97667	5.71027	5.27894	2.02882	2.92701
4.98	5.71337	5.28024	2.03261	2.92393
4.98333	5.71583	5.28044	2.0313	2.92766
4.98667	5.71599	5.2834	2.03132	2.9327
4.99	5.71618	5.28666	2.03084	2.93314
4.99333	5.7177	5.28779	2.03434	2.93927
4.99667	5.71906	5.2905	2.03532	2.94003
5	5.71986	5.293	2.03852	2.93926
5.00333	5.72343	5.29482	2.04177	2.93807
5.00667	5.72471	5.29686	2.04464	2.93685
5.01	5.72715	5.29947	2.04542	2.93469
5.01333	5.72899	5.30006	2.04566	2.941
5.01667	5.73025	5.30395	2.04656	2.94614
5.02	5.73178	5.30586	2.04716	2.9465
5.02333	5.73567	5.30682	2.04959	2.95156
5.02667	5.73649	5.30935	2.05009	2.95454
5.03	5.737	5.31382	2.05154	2.9534
5.03333	5.73882	5.31345	2.05528	2.95444
5.03667	5.73941	5.31589	2.05647	2.95947
5.04	5.73829	5.31816	2.05469	2.96199
5.04333	5.74037	5.31911	2.05704	2.96374
5.04667	5.74231	5.31808	2.05988	2.96847
5.05	5.74273	5.32109	2.05795	2.96691
5.05333	5.74288	5.32394	2.06047	2.96774
5.05667	5.74601	5.32464	2.06251	2.96868
5.06	5.74534	5.32751	2.06488	2.96658
5.06333	5.74751	5.33104	2.06554	2.96225
5.06667	5.75027	5.33264	2.06723	2.96382
5.07	5.75443	5.33467	2.07041	2.96627
5.07333	5.7574	5.33643	2.07073	2.96897
5.07667	5.76044	5.33883	2.07233	2.97121
5.08	5.76113	5.33994	2.07053	2.97369
5.08333	5.76292	5.34224	2.07335	2.9786
5.08667	5.7623	5.34444	2.07262	2.97825
5.09	5.76226	5.34886	2.07689	2.9793
5.09333	5.76349	5.34973	2.07835	2.98417
5.09667	5.76517	5.35297	2.08485	2.98729
5.1	5.76529	5.35494	2.08536	2.98451
5.10333	5.76607	5.35709	2.08577	2.98637
5.10667	5.76815	5.35843	2.0843	2.98496
5.11	5.7701	5.36148	2.08608	2.98426
5.11333	5.77257	5.36317	2.08634	2.98655
5.11667	5.77547	5.36767	2.0878	2.99264
5.12	5.77879	5.36928	2.08937	2.9931
5.12333	5.77972	5.37168	2.09187	2.99534
5.12667	5.7826	5.37561	2.0905	2.99615
5.13	5.78496	5.37831	2.08975	2.99544
5.13333	5.78627	5.37866	2.09205	2.9947
5.13667	5.78878	5.37976	2.09384	2.99994
5.14	5.79031	5.38143	2.097	2.99891
5.14333	5.7906	5.38204	2.09743	3.00281
5.14667	5.79007	5.38409	2.09882	3.00683
5.15	5.79086	5.38591	2.10121	3.00857
5.15333	5.79069	5.38791	2.10316	3.00883
5.15667	5.79194	5.38949	2.10207	3.01359
5.16	5.79349	5.3913	2.10472	3.01348
5.16333	5.79487	5.39098	2.10524	3.0138
5.16667	5.7981	5.3925	2.10431	3.0162
5.17	5.8008	5.39561	2.10454	3.01838
5.17333	5.80125	5.39841	2.10873	3.02073
5.17667	5.80155	5.40044	2.11153	3.02188
5.18	5.80356	5.40316	2.11378	3.02406
5.18333	5.80365	5.40409	2.11589	3.02573
5.18667	5.80342	5.40485	2.11665	3.02653
5.19	5.80674	5.40537	2.11552	3.02556
5.19333	5.80901	5.40501	2.11774	3.03054
5.19667	5.80991	5.40596	2.11811	3.03089
5.2	5.81312	5.40972	2.12027	3.0321
5.20333	5.81575	5.41122	2.12282	3.03794
5.20667	5.81561	5.41328	2.12528	3.04107
5.21	5.81726	5.41805	2.12584	3.03974
5.21333	5.81793	5.42135	2.12888	3.04328
5.21667	5.81832	5.42281	2.12721	3.04743
5.22	5.8195	5.4257	2.12885	3.04371
5.22333	5.82146	5.42664	2.12733	3.04626
5.22667	5.8214	5.42776	2.12698	3.04729
5.23	5.82412	5.43016	2.12709	3.04865
5.23333	5.82494	5.43039	2.12906	3.04741
5.23667	5.82599	5.4317	2.13397	3.05018
5.24	5.82794	5.43347	2.13546	3.05281
5.24333	5.83002	5.43553	2.13526	3.05366
5.24667	5.83116	5.43731	2.13827	3.05637
5.25	5.83277	5.43947	2.14034	3.05827
5.25333	5.83391	5.44134	2.1386	3.05789
5.25667	5.83353	5.44415	2.14076	3.05868
5.26	5.83626	5.44664	2.14213	3.06106
5.26333	5.83764	5.44713	2.14291	3.06087
5.26667	5.8381	5.44934	2.14431	3.06408
5.27	5.83935	5.44873	2.14492	3.07155
5.27333	5.84104	5.4508	2.14839	3.07066
5.27667	5.84246	5.45182	2.14919	3.07353
5.28	5.84258	5.452	2.14959	3.07547
5.28333	5.84426	5.45323	2.14892	3.07398
5.28667	5.84452	5.45444	2.15034	3.07504
5.29	5.84717	5.45726	2.15309	3.07489
5.29333	5.84805	5.45867	2.15596	3.07867
5.29667	5.84806	5.46144	2.1575	3.07743
5.3	5.84904	5.46413	2.16252	3.08144
5.30333	5.85135	5.4692	2.16356	3.08043
5.30667	5.85215	5.46889	2.16466	3.08263
5.31	5.8524	5.47	2.16501	3.07988
5.31333	5.85557	5.47312	2.16587	3.08497
5.31667	5.85688	5.47503	2.16695	3.08523
5.32	5.85882	5.47542	2.16934	3.08473
5.32333	5.86074	5.47892	2.16828	3.09113
5.32667	5.86245	5.4801	2.17193	3.09225
5.33	5.86441	5.48125	2.17408	3.09382
5.33333	5.86719	5.48072	2.17279	3.09415
5.33667	5.86638	5.48319	2.17259	3.09707
5.34	5.86725	5.48353	2.17264	3.09769
5.34333	5.86824	5.48453	2.17133	3.10095
5.34667	5.86847	5.48733	2.17218	3.09912
5.35	5.86934	5.48991	2.17378	3.10052
5.35333	5.8719	5.49069	2.17889	3.10494
5.35667	5.87276	5.49371	2.18322	3.10598
5.36	5.87299	5.49717	2.18499	3.10712
5.36333	5.87555	5.49776	2.18728	3.10813
5.36667	5.87451	5.49981	2.19071	3.10991
5.37	5.8764	5.50132	2.18968	3.10735
5.37333	5.87882	5.50264	2.18724	3.10843
5.37667	5.88124	5.50387	2.19292	3.11083
5.38	5.88012	5.50476	2.19222	3.11628
5.38333	5.88392	5.50557	2.19315	3.11979
5.38667	5.8856	5.50801	2.19338	3.12275
5.39	5.8859	5.50823	2.19887	3.12278
5.39333	5.88631	5.50884	2.19677	3.12797
5.39667	5.88944	5.50995	2.1984	3.12587
5.4	5.89096	5.51009	2.19755	3.12759
5.40333	5.89053	5.51245	2.20235	3.12777
5.40667	5.89155	5.51493	2.20202	3.12853
5.41	5.89344	5.51677	2.20194	3.12652
5.41333	5.89446	5.52098	2.20659	3.13088
5.41667	5.89517	5.52399	2.20754	3.13143
5.42	5.89738	5.52258	2.20606	3.13244
5.42333	5.89987	5.52385	2.20881	3.13619
5.42667	5.90046	5.52641	2.21182	3.13868
5.43	5.90181	5.52638	2.2088	3.13982
5.43333	5.9044	5.52901	2.21124	3.14011
5.43667	5.90608	5.53183	2.21349	3.14485
5.44	5.9052	5.53377	2.21317	3.14511
5.44333	5.90697	5.53457	2.21437	3.14971
5.44667	5.90906	5.53715	2.21829	3.14972
5.45	5.9073	5.53851	2.22022	3.15101
5.45333	5.90764	5.54071	2.22219	3.1523
5.45667	5.90971	5.54209	2.22373	3.15666
5.46	5.91219	5.5443	2.22395	3.15255
5.46333	5.91122	5.54441	2.22541	3.15664
5.46667	5.91388	5.54662	2.22621	3.15748
5.47	5.91712	5.5486	2.22677	3.15613
5.47333	5.91819	5.55128	2.22775	3.15723
5.47667	5.91764	5.55201	2.22875	3.15925
5.48	5.91877	5.55409	2.22727	3.16143
5.48333	5.92092	5.55514	2.2289	3.16372
5.48667	5.92147	5.5542	2.22729	3.16924
5.49	5.92352	5.55324	2.22909	3.16695
5.49333	5.92546	5.55637	2.23459	3.17062
5.49667	5.92784	5.55783	2.23997	3.1665
5.5	5.92741	5.55777	2.24226	3.16837
5.50333	5.9286	5.56122	2.24575	3.16759
5.50667	5.92885	5.5639	2.24452	3.16993
5.51	5.929	5.56424	2.24165	3.16726
5.51333	5.93028	5.56651	2.24079	3.16865
5.51667	5.93215	5.5702	2.24023	3.16976
5.52	5.93312	5.5725	2.24044	3.16955
5.52333	5.93526	5.57362	2.24645	3.17083
5.52667	5.93842	5.57551	2.24792	3.17861
5.53	5.93826	5.57699	2.24812	3.18308
5.53333	5.94017	5.57691	2.25165	3.18189
5.53667	5.94025	5.57865	2.25408	3.1826
5.54	5.94134	5.58059	2.25316	3.18407
5.54333	5.94029	5.58121	2.25454	3.18183
5.54667	5.94403	5.58061	2.25691	3.18397
5.55	5.94316	5.58398	2.25601	3.19043
5.55333	5.9455	5.58263	2.25625	3.19394
5.55667	5.9467	5.58249	2.25726	3.19895
5.56	5.94833	5.58483	2.25859	3.19872
5.56333	5.9483	5.58864	2.25967	3.19756
5.56667	5.95109	5.58798	2.26007	3.19704
5.57	5.95246	5.59064	2.2624	3.20096
5.57333	5.95188	5.5936	2.26333	3.20167
5.57667	5.95375	5.59562	2.2663	3.20112
5.58	5.95419	5.59406	2.2665	3.20365
5.58333	5.95469	5.5973	2.26858	3.20684
5.58667	5.95585	5.59889	2.27022	3.20358
5.59	5.95786	5.60001	2.27469	3.20075
5.59333	5.95969	5.60069	2.27583	3.2057
5.59667	5.96222	5.6041	2.28009	3.20696
5.6	5.96361	5.60493	2.28217	3.20514
5.60333	5.96238	5.60684	2.28483	3.20908
5.60667	5.96289	5.60802	2.28625	3.21224
5.61	5.96296	5.60909	2.28829	3.2124
5.61333	5.96386	5.60967	2.28814	3.21468
5.61667	5.9659	5.61175	2.28813	3.21466
5.62	5.96777	5.61271	2.28965	3.21623
5.62333	5.97	5.61498	2.28727	3.21828
5.62667	5.97157	5.61854	2.28831	3.21938
5.63	5.97189	5.61932	2.28721	3.22071
5.63333	5.97289	5.62021	2.29001	3.22461
5.63667	5.97409	5.62129	2.28926	3.22287
5.64	5.9753	5.62175	2.28888	3.22503
5.64333	5.97829	5.61906	2.28964	3.22816
5.64667	5.97893	5.62175	2.29217	3.22922
5.65	5.97989	5.62299	2.29038	3.23048
5.65333	5.98076	5.62613	2.29126	3.23235
5.65667	5.98201	5.6276	2.29514	3.23253
5.66	5.98034	5.63137	2.29427	3.23473
5.66333	5.98182	5.63306	2.29676	3.23492
5.66667	5.98196	5.63361	2.29947	3.23723
5.67	5.98333	5.6344	2.30321	3.23912
5.67333	5.98409	5.63566	2.30361	3.24348
5.67667	5.98578	5.63587	2.30791	3.24203
5.68	5.9876	5.63626	2.30709	3.24433
5.68333	5.98803	5.63793	2.31001	3.24323
5.68667	5.98969	5.63807	2.3087	3.24811
5.69	5.99088	5.64069	2.3112	3.24829
5.69333	5.9912	5.6417	2.30919	3.25295
5.69667	5.99243	5.64385	2.31275	3.2529
5.7	5.9948	5.64577	2.31237	3.25434
5.70333	5.995	5.64802	2.31573	3.2549
5.70667	5.99459	5.64776	2.31711	3.255
5.71	5.99835	5.65067	2.321	3.25191
5.71333	5.99881	5.65061	2.32275	3.25566
5.71667	6.0006	5.65154	2.32599	3.26071
5.72	6.00196	5.65282	2.32383	3.25987
5.72333	6.00546	5.65523	2.3273	3.26252
5.72667	6.00423	5.65515	2.32564	3.26842
5.73	6.0061	5.65788	2.32544	3.26684
5.73333	6.00548	5.65932	2.32614	3.26641
5.73667	6.00648	5.66108	2.32761	3.26546
5.74	6.00623	5.66074	2.32582	3.26852
5.74333	6.00793	5.66358	2.32715	3.26489
5.74667	6.00911	5.66326	2.32606	3.26912
5.75	6.01196	5.66532	2.3251	3.26769
5.75333	6.01362	5.66508	2.3269	3.27203
5.75667	6.0135	5.66634	2.32761	3.27277
5.76	6.01461	5.66807	2.33108	3.27804
5.76333	6.01568	5.66992	2.33461	3.27683
5.76667	6.01548	5.66967	2.33554	3.27777
5.77	6.016	5.67113	2.33769	3.28006
5.77333	6.01838	5.67434	2.33811	3.27912
5.77667	6.02001	5.67445	2.33821	3.27915
5.78	6.01966	5.67624	2.33758	3.28025
5.78333	6.02349	5.67939	2.33891	3.28492
5.78667	6.02539	5.68112	2.33979	3.28522
5.79	6.02777	5.68261	2.34197	3.28554
5.79333	6.02895	5.68358	2.34228	3.28977
5.79667	6.02962	5.68448	2.34611	3.29345
5.8	6.02882	5.68516	2.3464	3.29254
5.80333	6.02895	5.68605	2.34621	3.29139
5.80667	6.02998	5.68604	2.34876	3.29399
5.81	6.03005	5.68764	2.35116	3.29003
5.81333	6.03197	5.68857	2.3512	3.28994
5.81667	6.02995	5.68861	2.35074	3.29431
5.82	6.0325	5.69019	2.3521	3.29948
5.82333	6.0322	5.69135	2.35527	3.30057
5.82667	6.03424	5.69105	2.35312	3.30523
5.83	6.0346	5.69204	2.35475	3.30715
5.83333	6.03731	5.69365	2.35785	3.30744
5.83667	6.03785	5.69578	2.36106	3.30889
5.84	6.03815	5.69792	2.35996	3.30993
5.84333	6.04014	5.70105	2.36378	3.31149
5.84667	6.04254	5.70298	2.36396	3.31544
5.85	6.04423	5.70498	2.36631	3.31806
5.85333	6.04809	5.70464	2.36565	3.31888
5.85667	6.04929	5.70652	2.3657	3.31887
5.86	6.04748	5.70813	2.36626	3.31774
5.86333	6.04835	5.70934	2.36799	3.31871
5.86667	6.0486	5.70954	2.3677	3.31917
5.87	6.04745	5.71122	2.3684	3.31575
5.87333	6.04801	5.71165	2.36906	3.32061
5.87667	6.05003	5.71153	2.36908	3.32483
5.88	6.05147	5.71357	2.3694	3.32147
5.88333	6.05461	5.71534	2.37247	3.3221
5.88667	6.05552	5.7183	2.37626	3.32521
5.89	6.05876	5.71981	2.37764	3.32549
5.89333	6.06058	5.72147	2.38194	3.32405
5.89667	6.06168	5.72043	2.38312	3.32577
5.9	6.06134	5.72121	2.38697	3.32481
5.90333	6.06122	5.72092	2.38638	3.32432
5.90667	6.06192	5.72082	2.39011	3.32565
5.91	6.06352	5.7218	2.39135	3.33043
5.91333	6.06307	5.7244	2.39203	3.33427
5.91667	6.06544	5.72649	2.38914	3.3375
5.92	6.06628	5.72876	2.38809	3.34355
5.92333	6.06734	5.73109	2.38739	3.34523
5.92667	6.06751	5.73242	2.38552	3.34601
5.93	6.07001	5.73365	2.38603	3.34376
5.93333	6.06958	5.73506	2.38769	3.34296
5.93667	6.07106	5.73678	2.39049	3.34076
5.94	6.07215	5.73538	2.39496	3.34392
5.94333	6.07226	5.73838	2.39526	3.34194
5.94667	6.07165	5.74018	2.39853	3.34757
5.95	6.07343	5.73973	2.39815	3.35149
5.95333	6.07442	5.73846	2.40026	3.35479
5.95667	6.07456	5.74147	2.39991	3.35547
5.96	6.0747	5.74213	2.40236	3.35817
5.96333	6.07592	5.74199	2.40232	3.35584
5.96667	6.0765	5.74454	2.40496	3.35814
5.97	6.07724	5.74758	2.40537	3.35715
5.97333	6.07783	5.74693	2.40635	3.35991
5.97667	6.0803	5.74523	2.40873	3.35944
5.98	6.07999	5.74829	2.41021	3.36491
5.98333	6.0816	5.74794	2.41246	3.36512
5.98667	6.08334	5.74756	2.41343	3.36562
5.99	6.08288	5.74989	2.41365	3.36566
5.99333	6.08504	5.75332	2.41261	3.36598
5.99667	6.08876	5.75326	2.4146	3.3648
6	6.08914	5.75504	2.41342	3.36697
6.00333	6.09015	5.75648	2.4137	3.37
6.00667	6.09359	5.75905	2.41662	3.36781
6.01	6.09277	5.76064	2.41787	3.37189
6.01333	6.09289	5.76127	2.41608	3.3745
6.01667	6.09401	5.76218	2.41934	3.37383
6.02	6.09398	5.76172	2.41903	3.37429
6.02333	6.09477	5.76076	2.41757	3.37656
6.02667	6.09584	5.76135	2.41828	3.37839
6.03	6.09569	5.76242	2.42153	3.37993
6.03333	6.09583	5.76215	2.42314	3.38018
6.03667	6.09783	5.76428	2.42488	3.38162
6.04	6.09898	5.7669	2.42707	3.38542
6.04333	6.10045	5.76782	2.42976	3.38435
6.04667	6.10141	5.76968	2.42975	3.3836
6.05	6.1031	5.77206	2.42942	3.38517
6.05333	6.10379	5.77319	2.43162	3.3882
6.05667	6.10622	5.77327	2.43389	3.3886
6.06	6.10721	5.7746	2.43545	3.39076
6.06333	6.10932	5.77545	2.43734	3.39384
6.06667	6.11008	5.77591	2.44004	3.39189
6.07	6.10986	5.77775	2.44258	3.39388
6.07333	6.10837	5.77899	2.4444	3.39644
6.07667	6.10991	5.77936	2.44453	3.39593
6.08	6.11004	5.78217	2.44498	3.39524
6.08333	6.11041	5.78304	2.445	3.40074
6.08667	6.11109	5.78536	2.44598	3.40071
6.09	6.11335	5.78586	2.44824	3.39795
6.09333	6.11379	5.78845	2.45204	3.40005
6.09667	6.1156	5.78715	2.45523	3.40199
6.1	6.11761	5.78798	2.45747	3.40054
6.10333	6.1198	5.78598	2.45722	3.40356
6.10667	6.12082	5.78797	2.45623	3.40562
6.11	6.12159	5.78627	2.45421	3.40835
6.11333	6.12244	5.78787	2.45481	3.40722
6.11667	6.12325	5.78874	2.45444	3.41208
6.12	6.12315	5.79091	2.45524	3.41226
6.12333	6.1229	5.79294	2.45542	3.41373
6.12667	6.12485	5.79597	2.46092	3.41512
6.13	6.12555	5.79588	2.46284	3.4161
6.13333	6.12643	5.79706	2.4632	3.41341
6.13667	6.12842	5.79933	2.46448	3.4119
6.14	6.12865	5.79802	2.46817	3.41642
6.14333	6.12999	5.79812	2.46352	3.41375
6.14667	6.1312	5.80043	2.46233	3.41502
6.15	6.13048	5.80152	2.46315	3.41711
6.15333	6.13037	5.8012	2.46295	3.41809
6.15667	6.13312	5.80411	2.46274	3.41735
6.16	6.1331	5.80448	2.46793	3.42352
6.16333	6.13462	5.80498	2.46881	3.42871
6.16667	6.13631	5.80634	2.47052	3.42785
6.17	6.13803	5.80763	2.47401	3.42792
6.17333	6.13854	5.807	2.47318	3.42848
6.17667	6.13931	5.80788	2.47497	3.42794
6.18	6.14085	5.80816	2.47463	3.4279
6.18333	6.14239	5.80957	2.47569	3.43192
6.18667	6.1429	5.80991	2.47535	3.43715
6.19	6.14401	5.81121	2.4778	3.43665
6.19333	6.14387	5.81382	2.47481	3.43657
6.19667	6.14376	5.81565	2.47756	3.43905
6.2	6.1441	5.81684	2.47762	3.43876
6.20333	6.14675	5.81866	2.48019	3.43901
6.20667	6.1481	5.81868	2.48065	3.4409
6.21	6.15066	5.81857	2.48389	3.44103
6.21333	6.15005	5.81921	2.4849	3.44042
6.21667	6.15245	5.82066	2.4872	3.44239
6.22	6.15219	5.82139	2.48958	3.44134
6.22333	6.14975	5.82428	2.49078	3.4445
6.22667	6.15098	5.82598	2.48946	3.4464
6.23	6.15243	5.82743	2.48834	3.44451
6.23333	6.15281	5.82785	2.48846	3.44781
6.23667	6.15466	5.82849	2.48704	3.44894
6.24	6.15799	5.83047	2.49066	3.44711
6.24333	6.15694	5.82961	2.49373	3.4501
6.24667	6.15947	5.83057	2.4949	3.45665
6.25	6.16038	5.83208	2.49938	3.45712
6.25333	6.15958	5.83372	2.50227	3.45999
6.25667	6.16152	5.83471	2.49893	3.46267
6.26	6.16307	5.83628	2.50039	3.46141
6.26333	6.16305	5.83833	2.50372	3.45948
6.26667	6.16337	5.83877	2.50112	3.4636
6.27	6.16591	5.83835	2.50117	3.46599
6.27333	6.16595	5.83662	2.50561	3.46848
6.27667	6.1678	5.83871	2.5063	3.46867
6.28	6.16769	5.8372	2.50596	3.47013
6.28333	6.16964	5.83752	2.50816	3.46741
6.28667	6.17124	5.84071	2.50777	3.4679
6.29	6.17265	5.84302	2.51018	3.4667
6.29333	6.17215	5.84388	2.51132	3.47479
6.29667	6.17476	5.8465	2.51652	3.47416
6.3	6.17425	5.84763	2.51711	3.4731
6.30333	6.17275	5.84852	2.51907	3.47246
6.30667	6.17305	5.84863	2.51867	3.47708
6.31	6.17481	5.84893	2.51842	3.47178
6.31333	6.17539	5.84785	2.51829	3.47159
6.31667	6.17618	5.85003	2.52036	3.47432
6.32	6.17582	5.85154	2.52082	3.47943
6.32333	6.17635	5.85439	2.52307	3.4767
6.32667	6.17646	5.8553	2.52646	3.47772
6.33	6.1776	5.85643	2.52459	3.48288
6.33333	6.18034	5.85575	2.52778	3.48137
6.33667	6.18342	5.85433	2.52846	3.47666
6.34	6.18466	5.85501	2.52833	3.47934
6.34333	6.18474	5.85613	2.53163	3.48548
6.34667	6.18476	5.8571	2.53328	3.48428
6.35	6.1865	5.85927	2.5305	3.48994
6.35333	6.18549	5.86005	2.53572	3.49189
6.35667	6.18693	5.85978	2.53427	3.49344
6.36	6.19014	5.86047	2.53165	3.48936
6.36333	6.1926	5.86166	2.53479	3.48864
6.36667	6.19032	5.8614	2.53551	3.4872
6.37	6.19364	5.86399	2.53571	3.48816
6.37333	6.19381	5.86549	2.53804	3.48894
6.37667	6.1941	5.86763	2.54092	3.49283
6.38	6.19425	5.86907	2.54018	3.49556
6.38333	6.19547	5.87021	2.54422	3.49586
6.38667	6.19671	5.86915	2.5417	3.49787
6.39	6.19783	5.86997	2.54355	3.49924
6.39333	6.19827	5.87108	2.54319	3.49706
6.39667	6.1977	5.87284	2.5464	3.49772
6.4	6.19927	5.87254	2.54619	3.4984
6.40333	6.19639	5.87498	2.55134	3.50176
6.40667	6.19591	5.8776	2.55432	3.50121
6.41	6.19685	5.87704	2.5581	3.50683
6.41333	6.19848	5.87832	2.5581	3.50572
6.41667	6.20033	5.87993	2.55847	3.50962
6.42	6.20237	5.8807	2.55734	3.50894
6.42333	6.20482	5.88131	2.55503	3.50938
6.42667	6.20441	5.88159	2.55568	3.50685
6.43	6.20611	5.88202	2.55616	3.50877
6.43333	6.20647	5.88376	2.55638	3.50703
6.43667	6.2097	5.8837	2.55668	3.50629
6.44	6.21043	5.88086	2.55775	3.50805
6.44333	6.21236	5.88172	2.56021	3.51233
6.44667	6.21292	5.88255	2.55891	3.51447
6.45	6.21436	5.88268	2.56337	3.51494
6.45333	6.21377	5.88462	2.56286	3.51769
6.45667	6.21395	5.88649	2.56481	3.52116
6.46	6.21357	5.88815	2.56404	3.5183
6.46333	6.21362	5.88798	2.56514	3.52157
6.46667	6.21535	5.89035	2.56466	3.5268
6.47	6.21715	5.89045	2.5671	3.52705
6.47333	6.21769	5.89284	2.56833	3.52463
6.47667	6.22047	5.8942	2.57016	3.5299
6.48	6.22142	5.896	2.57494	3.52709
6.48333	6.22048	5.89625	2.57683	3.5279
6.48667	6.22031	5.89684	2.57578	3.52761
6.49	6.22293	5.8979	2.57521	3.53214
6.49333	6.22258	5.89934	2.57676	3.52924
6.49667	6.22415	5.89916	2.57564	3.53462
6.5	6.22473	5.90094	2.57393	3.53328
6.50333	6.22486	5.90388	2.5774	3.5339
6.50667	6.22592	5.90235	2.58039	3.53367
6.51	6.22656	5.90292	2.57995	3.53571
6.51333	6.22749	5.90441	2.58102	3.53773
6.51667	6.22875	5.9033	2.58204	3.53675
6.52	6.23179	5.9014	2.58396	3.5423
6.52333	6.23202	5.90348	2.58527	3.54095
6.52667	6.23208	5.90303	2.58515	3.54233
6.53	6.23235	5.90637	2.58562	3.53703
6.53333	6.23387	5.90777	2.58857	3.53779
6.53667	6.23263	5.90979	2.58835	3.53586
6.54	6.23216	5.91201	2.5868	3.53968
6.54333	6.23552	5.91404	2.59031	3.54379
6.54667	6.23629	5.91266	2.59204	3.54843
6.55	6.23696	5.91469	2.59141	3.55409
6.55333	6.23912	5.91335	2.59324	3.55546
6.55667	6.24109	5.91223	2.59677	3.55495
6.56	6.24028	5.91128	2.59477	3.55233
6.56333	6.24246	5.91163	2.59517	3.5543
6.56667	6.24261	5.9112	2.59808	3.5543
6.57	6.24294	5.91393	2.59667	3.55557
6.57333	6.24302	5.91503	2.59845	3.55587
6.57667	6.24356	5.9164	2.59938	3.55963
6.58	6.24432	5.91708	2.6007	3.55985
6.58333	6.24531	5.91762	2.60245	3.55999
6.58667	6.24599	5.91719	2.60755	3.56086
6.59	6.24627	5.91978	2.60558	3.56118
6.59333	6.24762	5.92041	2.60571	3.56244
6.59667	6.24708	5.92112	2.60869	3.56161
6.6	6.24797	5.92196	2.60762	3.56513
6.60333	6.24787	5.92367	2.60597	3.57006
6.60667	6.24926	5.92249	2.6081	3.57503
6.61	6.24961	5.92219	2.61308	3.57181
6.61333	6.2506	5.92413	2.61164	3.57545
6.61667	6.24993	5.92605	2.61306	3.57553
6.62	6.25331	5.92678	2.61721	3.5708
6.62333	6.25355	5.93007	2.61804	3.56969
6.62667	6.25517	5.93197	2.61839	3.57187
6.63	6.25581	5.933	2.62141	3.56994
6.63333	6.25754	5.93386	2.62368	3.56725
6.63667	6.25779	5.93479	2.62189	3.57072
6.64	6.25953	5.93402	2.62216	3.57315
6.64333	6.25994	5.93429	2.62048	3.5793
6.64667	6.26141	5.93438	2.62193	3.58171
6.65	6.26212	5.93389	2.61902	3.58292
6.65333	6.26384	5.93704	2.62079	3.58214
6.65667	6.26441	5.93929	2.62186	3.58003
6.66	6.26474	5.93944	2.62568	3.57632
[truncated: 22,302 more rows]
