# Supplementary material for: Early steps of protein disaggregation by Hsp70 chaperone and class B J-domain proteins are shaped by Hsp110
Source: eLife. 2024 Oct 15;13:RP94795. doi: 10.7554/eLife.94795 (PMC11479587; doi:10.7554/eLife.94795)
Supplement: Figure 3—source data 1. [file elife-94795-fig3-data1.xlsx]

## Sheet: Fig 3A
	Sis1,Ssa1			Ydj1, Ssa1
Sse1 (µM)	Mean	SD	N	Mean	SD	N
0	1.48582	0.421653	3	0.157366	0.034234	3
0.025	4.06356	0.319266	3	0.148428	0.038779	3
0.05	4.3462	0.710932	3	0.133618	0.042544	3
0.1	4.40585	0.682827	3	0.094637	0.041846	3
0.2	3.5004	0.930854	3	0.053527	0.035089	3
0.3	2.28286	1.01996	3	0.022369	0.005951	3
0.5	0.925826	0.803675	3	0.007143	0.003759	3
1	0.00846	0.014292	3	0.000615	0.000326	3
2	0.000103	5.74e-05	3	0.000112	4.7e-05	3
	Model fitting:
	Sis1,Ssa1					Sis1,Ssa1						Ydj1, Ssa1
0	1.48582	0.421653	3		0.1	4.40585	0.682827	3		0	0.157366	0.034234	3
0.025	4.06356	0.319266	3		0.2	3.5004	0.930854	3		0.025	0.148428	0.038779	3
0.05	4.3462	0.710932	3		0.3	2.28286	1.01996	3		0.05	0.133618	0.042544	3
0.1	4.40585	0.682827	3		0.5	0.925826	0.803675	3		0.1	0.094637	0.041846	3
					1	0.00846	0.014292	3		0.2	0.053527	0.035089	3
					2	0.000103	5.74e-05	3		0.3	0.022369	0.005951	3
										0.5	0.007143	0.003759	3
										1	0.000615	0.000326	3
										2	0.000112	4.7e-05	3
GraphPrism Model	Agonist vs. response -- Variable slope (3 parameters) [2]					Agonist vs. response -- Variable slope (four parameters)					Agonist vs. response -- Variable slope (four parameters)
Equation	Y=Bottom + (X^Hillslope)*(Top-Bottom)/(X^HillSlope + EC50^HillSlope)
						Best-fit values					Best-fit values
	HillSlope	1				Bottom	~ 1,445e-016				Bottom	~ 1,556e-016
						Top	4.585				Top	0.1558
						logEC50	-0.5215				logEC50	-0.8884
						HillSlope	-2.877				HillSlope	-1.918
	Best-fit values					EC50	0.301				EC50	0.1293
	Bottom	1.486				Span	~ 4,585				Span	~ 0,1558
	Top	4.571				Std. Error					Std. Error
	logEC50	-2.325				Bottom					Bottom
	EC50	0.004728				Top	0.5661				Top	0.01223
	Span	3.085				logEC50	0.06162				logEC50	0.08677
	Std. Error					HillSlope	1.127				HillSlope	0.6151
	Bottom	0.3049				Span					Span
	Top	0.4349				95% Confidence Intervals					95% Confidence Intervals
	logEC50	0.5973				Bottom					Bottom
	Span	0.5293				Top	3,371 to 5,799				Top	0,1305 to 0,1811
	95% Confidence Intervals					logEC50	-0,6537 to -0,3893				logEC50	-1,068 to -0,7089
	Bottom	0,7959 to 2,175				HillSlope	-5,295 to -0,4600				HillSlope	-3,190 to -0,6448
	Top	3,587 to 5,554				EC50	0,2220 to 0,4080				EC50	0,08552 to 0,1955
	logEC50	-3,676 to -0,9741				Span					Span
	EC50	0,0002106 to 0,1061				Goodness of Fit					Goodness of Fit
	Span	1,888 to 4,282				Degrees of Freedom	14				Degrees of Freedom	23
	Goodness of Fit					R square	0.8936				R square	0.8715
	Degrees of Freedom	9				Absolute Sum of Squares	6.105				Absolute Sum of Squares	0.01528
	R square	0.8755				Sy.x	0.6603				Sy.x	0.02577
	Absolute Sum of Squares	2.511				Constraints					Constraints
	Sy.x	0.5282				Bottom	Bottom > 0,0				Bottom	Bottom > 0,0
						Top	Top > 0,0				Top	Top > 0,0
