# Supplementary material for: Early steps of protein disaggregation by Hsp70 chaperone and class B J-domain proteins are shaped by Hsp110
Source: eLife. 2024 Oct 15;13:RP94795. doi: 10.7554/eLife.94795 (PMC11479587; doi:10.7554/eLife.94795)
Supplement: Figure 3—source data 2. [file elife-94795-fig3-data2.xlsx]

## Sheet: Fig. 3B
Hsp105 (µM)	HSC70, DNAJB4			HSC70, DNAJA2
0	0.213492	0.253764	0.314036	0.169079	0.173985	0.206595
0.3	5.02975	5.56571	5.77569	0.44233	0.519317	0.687852
0.9	7.95284	7.90986	9.03855	0.407918	0.385867	0.683547
1.5	9.05708	8.57658	9.45298	0.352547	0.272231	0.424771
3	6.4123	6.78892	8.01015	0.224298	0.152809	0.17299
4	3.95058	4.09703	2.31645	0.069733	0.081492	0.082416
