# Supplementary material for: Early steps of protein disaggregation by Hsp70 chaperone and class B J-domain proteins are shaped by Hsp110
Source: eLife. 2024 Oct 15;13:RP94795. doi: 10.7554/eLife.94795 (PMC11479587; doi:10.7554/eLife.94795)
Supplement: Figure 3—source data 3. [file elife-94795-fig3-data3.xlsx]

## Sheet: Fig. 3C
Sse1 (µM)	- chaperones			Ssa1, Sis1			Ssa1, Ydj1
0	16.823	16.304	18.3158	29.3971	29.9485	23.1632	37.3086	52.4874	52.038
0.1				26.6909	18.7323	31.2971	35.8364	36.117	48.1807
0.3				16.8291	15.7374	17.9924	19.4559	31.2132	34.2167
0.6				13.5205	17.9961	15.5927	23.5599	32.5398	23.3363
1				15.7337	7.27169	16.9447	14.745	21.5899	26.769
