# Supplementary material for: Early steps of protein disaggregation by Hsp70 chaperone and class B J-domain proteins are shaped by Hsp110
Source: eLife. 2024 Oct 15;13:RP94795. doi: 10.7554/eLife.94795 (PMC11479587; doi:10.7554/eLife.94795)
Supplement: Figure 3—source data 4. [file elife-94795-fig3-data4.xlsx]

## Sheet: Fig. 3D - left and middle panel
Time (s)	Sis1, Ssa1	Sis1, Ssa1,0,025 Sse	Sis1, Ssa1, 0,05 Sse	Sis1, Ssa1, 0,1 Sse	Sis1, Ssa1, 0,2 Sse	Sis1, Ssa1, 0,3 Sse	Sis1, Ssa1, 0,5 Sse	Sis1, Ssa1, 1 Sse			Time (s)	Sis1, Ssa1	Sis1, Ssa1, 0,025 Sse	Sis1, Ssa1, 0,05 Sse	Sis1, Ssa1, 0,1 Sse	Sis1, Ssa1, 0,2 Sse	Sis1, Ssa1, 0,3 Sse	Sis1, Ssa1, 0,5 Sse	Sis1, Ssa1, 1 Sse		Time (s)	Sis1, Ssa1	Sis1, Ssa1, 0,025 Sse	Sis1, Ssa1, 0,05 Sse	Sis1, Ssa1, 0,1 Sse	Sis1, Ssa1, 0,2 Sse	Sis1, Ssa1, 0,3 Sse	Sis1, Ssa1, 0,5 Sse	Sis1, Ssa1, 1 Sse		Time (s)	Ydj1, Ssa1	Ydj1, Ssa1, 0,025uM Sse1	Ydj1, Ssa1, 0,05uM Sse1	Ydj1, Ssa1, 0,1uM Sse1	Ydj1, Ssa1, 0,2uM Sse1	Ydj1, Ssa1, 0,3uM Sse1	Ydj1, Ssa1, 0,5uM Sse1	Ydj1, Ssa1, 1uM Sse1		Time (s)	Ydj1, Ssa1	Ydj1, Ssa1, 0,025uM Sse1	Ydj1, Ssa1, 0,05uM Sse1	Ydj1, Ssa1, 0,1uM Sse1	Ydj1, Ssa1, 0,2uM Sse1	Ydj1, Ssa1, 0,3uM Sse1	Ydj1, Ssa1, 0,5uM Sse1	Ydj1, Ssa1, 1uM Sse1
0	0	0	0	0	0	0	0	0			0	0	0	0	0	0	0	0	0		0	0	0	0	0	0	0	0	0		0	0	0	0	0	0	0	0	0		0	0	0	0	0	0	0	0	0
0.2	-0.00239587	-0.000468887	0.00016119	-0.00454665	-0.00415963	-0.00785298	-0.0122175	0.00983517			0.2	-0.00125995	0.00156902	0.0115144	0.00321877	1.07031e-05	0.00103252	-0.0119263	-0.0174593		0.2	-0.00581436	0.00526993	0.00113541	0.00789478	0.00193699	0.00727661	-0.0116085	0.00370386		0.2	0.00217086	0.0013104	-0.00616399	-0.00279975	-0.0049726	0.00019952	0.00025626	-0.00133608		0.2	0.00379908	0.000257315	0.0043918	0.00287048	0.00190857	-0.00710933	-0.00368467	0.00504628
0.4	-0.00257536	-0.00444185	0.00106435	-0.0100333	-0.0106492	-0.0125417	-0.0169759	0.0166853			0.4	-0.000820889	-0.00804788	0.0189124	-0.00606924	0.0025954	0.0151996	-0.0271641	-0.0369311		0.4	0.00818257	0.00770539	7.68532e-05	0.0130035	0.00654073	0.00827223	-0.0109459	0.00820016		0.4	-0.00131943	-0.00223439	-0.0029947	0.00056523	-0.00933308	-0.00611188	-0.00204691	-0.00292008		0.4	0.00189084	-0.00175974	0.0041935	0.00421503	0.00217306	-0.00713512	-0.0044928	0.00762712
0.6	-0.00140712	-0.007617	0.00440574	-0.0186543	-0.0185841	-0.0160437	-0.0163661	0.0232651			0.6	0.000145593	-0.0116118	0.0238713	-0.00295975	0.000529487	0.014988	-0.0204116	-0.0376244		0.6	0.00426254	0.00511265	0.000650401	0.0199586	0.00744564	0.00635822	-0.00888559	0.00945906		0.6	-0.00417265	-0.0124784	-0.00801916	-0.00751358	-0.00896959	-0.0055941	-0.00254624	-0.00842236		0.6	0.00427866	-0.00546691	0.00646768	0.00573662	0.00193682	-0.00647205	-0.00347112	0.00887343
0.8	-0.00222039	-0.0114367	0.00336079	-0.0217481	-0.0257695	-0.0170714	-0.0134322	0.02566			0.8	-0.000992389	-0.0133487	0.0256767	-0.00824084	0.00106791	0.0227078	-0.0247735	-0.0376807		0.8	0.00876947	0.00689596	0.00120705	0.0290389	0.00616878	0.0081685	-0.00943787	0.0119254		0.8	-0.00656867	-0.00979472	-0.010449	-0.00788419	-0.0155319	-0.0128671	-0.00206041	-0.00710601		0.8	0.00453326	-0.00569159	0.00481008	0.00736571	0.00176298	-0.0060704	-0.00236766	0.00916606
1	-0.00424696	-0.012123	0.00793972	-0.0256556	-0.0306498	-0.0181219	-0.013995	0.0265814			1	3.74439e-05	-0.0149257	0.0267768	-0.00890558	-0.000147073	0.0223791	-0.0335304	-0.0426894		1	0.00955171	0.00860698	0.001519	0.0354817	0.00759732	0.00774844	-0.0114981	0.0152629		1	-0.00650212	-0.00993051	-0.0130502	-0.00934025	-0.0119789	-0.0141383	-0.00486786	-0.00842004		1	0.00375522	-0.00593037	0.00652174	0.00788108	0.00299416	-0.00674118	-0.00360706	0.00806229
1.2	-0.00332078	-0.0141922	0.000864906	-0.0271087	-0.0358563	-0.0170862	-0.0126995	0.0248339			1.2	-0.000965114	-0.0166995	0.0254112	-0.0103775	-0.000180179	0.0215793	-0.0311754	-0.0456236		1.2	0.00922359	0.00687363	0.00151371	0.0381171	0.0066903	0.00530502	-0.00843456	0.0163927		1.2	-0.00829741	-0.0112985	-0.0131411	-0.0111851	-0.016105	-0.0152977	-0.00027701	-0.0138278		1.2	0.0043129	-0.00592244	0.00456907	0.00794923	0.00408585	-0.00602791	-0.00309772	0.00549586
1.4	-0.00161799	-0.0148758	0.00506559	-0.0278745	-0.0375996	-0.0158556	-0.0123384	0.0243462			1.4	-0.00241822	-0.0145671	0.0264296	-0.0080692	-0.00251449	0.0107946	-0.0236655	-0.0392268		1.4	0.00712524	0.00749239	0.000515605	0.0352297	0.00243862	0.00064672	-0.0092904	0.0149759		1.4	-0.00875561	-0.0101066	-0.0092436	-0.013299	-0.0183435	-0.0112966	-0.00453843	-0.00696467		1.4	0.00574759	-0.00503579	0.00405381	0.00918976	0.00561999	-0.00699413	-0.001986	0.00499094
1.6	-0.00157268	-0.0154009	-0.00344914	-0.025724	-0.0374698	-0.0148418	-0.0149744	0.0229846			1.6	-0.00334886	-0.0174566	0.0279538	-0.0112769	-0.00136333	0.0111223	-0.0340806	-0.0380115		1.6	0.00488043	0.00870068	-0.0010292	0.0220869	0.0014931	-0.00313778	-0.011002	0.0134125		1.6	-0.0100175	-0.012723	-0.0106635	-0.0107976	-0.0161826	-0.0201527	-0.00714948	-0.00801028		1.6	0.00455916	-0.00380648	0.00284851	0.00852821	0.00493232	-0.00811358	-0.00224638	0.00438698
1.8	-0.000584982	-0.0156505	-0.00269193	-0.0269567	-0.0353616	-0.0167481	-0.019735	0.023714			1.8	-0.00412554	-0.0170049	0.0273595	-0.00973706	-0.00167197	0.0107312	-0.0384703	-0.0407265		1.8	0.00589955	0.00776877	-0.000761838	0.00166543	0.00153633	-0.00723347	-0.0129415	0.00916892		1.8	-0.0113787	-0.0154487	-0.0125228	-0.0154449	-0.0131152	-0.0170234	-0.00057578	-0.00728802		1.8	0.0051196	-0.000677977	0.00420572	0.00824053	0.00744563	-0.00995003	-0.00198172	0.00325407
2	0.00321245	-0.015814	-0.00472954	-0.0271329	-0.0335472	-0.0175316	-0.0191914	0.0247777			2	-0.0063287	-0.0172185	0.0254041	-0.0104051	-0.000449108	0.00616422	-0.0290454	-0.0450382		2	-0.00472189	0.00968586	-0.00303644	-0.0189234	-3.91489e-05	-0.0117019	-0.0101533	0.000972901		2	-0.00966573	-0.0143271	-0.00964698	-0.011737	-0.0150389	-0.0162986	-0.00104855	-0.0102644		2	0.0064084	-0.00151295	0.00195199	0.00731502	0.00778186	-0.0103984	0.00112274	0.00312177
2.2	0.00302638	-0.0122033	-0.00588761	-0.0293887	-0.0307884	-0.019853	-0.0189095	0.0238016			2.2	-0.00589289	-0.018069	0.0265331	-0.0139158	-0.000825674	0.0106537	-0.0271362	-0.0414911		2.2	-0.000126895	0.0120551	-0.00467745	-0.0309124	-0.00228529	-0.0155547	-0.0110685	-0.00642795		2.2	-0.012346	-0.0155746	-0.00793239	-0.0192661	-0.0163605	-0.0184683	-0.00465444	-0.00725115		2.2	0.00591303	-0.0038364	0.00247219	0.00647834	0.00745735	-0.0111198	0.00503545	0.00482205
2.4	0.00311934	-0.00993719	-0.00884587	-0.0303991	-0.0290511	-0.0226075	-0.0185509	0.0213179			2.4	-0.0054744	-0.0166386	0.0240117	-0.0144833	-0.00255235	0.0145403	-0.0332001	-0.0387194		2.4	-0.0135942	0.0127447	-0.00614907	-0.031699	-0.00190078	-0.0179526	-0.0137132	-0.0111341		2.4	-0.0104675	-0.0182608	-0.0114121	-0.0171522	-0.0182679	-0.0216052	-0.00311006	-0.00911213		2.4	0.00760174	-0.00359231	0.0034159	0.00504428	0.00666095	-0.010897	0.00852404	0.00494746
2.6	0.00196123	-0.00862923	-0.000561767	-0.0326589	-0.0264635	-0.0247973	-0.0183523	0.0225304			2.6	-0.00616217	-0.0119339	0.0232798	-0.0172497	-0.00327295	0.0129624	-0.0360472	-0.0373334		2.6	-0.00317628	0.0170015	-0.0061425	-0.0190632	-0.00194266	-0.0193895	-0.0133438	-0.0116296		2.6	-0.0148129	-0.0177588	-0.0114648	-0.0136849	-0.0180789	-0.0158901	-0.00300385	-0.0120561		2.6	0.007574	-0.00225336	0.00221797	0.00516163	0.00945447	-0.0115495	0.0132615	0.0044822
2.8	0.000621749	-0.00669876	-0.0093255	-0.0338331	-0.0262723	-0.0249235	-0.0192826	0.0220421			2.8	-0.0053593	-0.0118742	0.0259777	-0.0175265	-0.00473	0.00549633	-0.027193	-0.0361353		2.8	-0.0154352	0.0173889	-0.0100884	-0.00887937	0.000107732	-0.0246189	-0.0101656	-0.00830217		2.8	-0.0152918	-0.0135724	-0.0130041	-0.0152889	-0.0146841	-0.0200323	-0.00034203	-0.0134422		2.8	0.00801731	-0.0052598	0.00234086	0.00349871	0.00717005	-0.0102993	0.0155182	0.0030983
3	-0.00165956	-0.0101788	-0.0103462	-0.034878	-0.026094	-0.0255896	-0.0227817	0.0187746			3	-0.00624477	-0.00545363	0.0293092	-0.0188861	-0.00700089	0.00883226	-0.0248225	-0.0353601		3	-0.00420441	0.015266	-0.0103086	-0.00611519	0.000340753	-0.0282263	-0.012106	-0.00115665		3	-0.0124519	-0.0154999	-0.0133806	-0.0196947	-0.0222045	-0.0200068	-0.00328556	-0.013098		3	0.00918567	-0.00573382	0.00188309	0.00366377	0.00654381	-0.010388	0.0171309	0.0038892
3.2	-0.00467762	-0.018965	0.000472444	-0.0333338	-0.0255597	-0.0260595	-0.0251597	0.0225476			3.2	-0.00814107	0.0013332	0.0294667	-0.0183518	-0.00808364	0.0051272	-0.0282873	-0.0411238		3.2	-0.0151047	0.0181281	-0.0138275	-0.012276	0.00399629	-0.0309988	-0.0120972	0.00422986		3.2	-0.0113867	-0.0129556	-0.0105591	-0.0180406	-0.0206511	-0.0253021	-0.00277656	-0.0109342		3.2	0.00936835	-0.0038196	0.00292831	0.00420882	0.00656939	-0.00961587	0.0192957	0.00311067
3.4	-0.00554591	-0.0254007	-0.00930199	-0.0360455	-0.0267429	-0.0261616	-0.0287452	0.0246471			3.4	-0.00979772	0.00606296	0.0299652	-0.0167864	-0.00817722	0.00837991	-0.0288383	-0.0472597		3.4	-0.00465181	0.0184403	-0.0147359	-0.0206358	0.00651922	-0.0343424	-0.00894433	0.00271328		3.4	-0.0177946	-0.0194852	-0.0147485	-0.0195729	-0.0202587	-0.0228208	-0.00174533	-0.0147075		3.4	0.00737325	-0.00356126	0.0017515	0.00351077	0.00637739	-0.0102482	0.0191561	0.000760004
3.6	-0.00418376	-0.0303941	-0.0156916	-0.0353014	-0.0279989	-0.0256217	-0.0289916	0.023173			3.6	-0.0103271	0.00577051	0.0286412	-0.018466	-0.00832877	0.00619292	-0.0286679	-0.0506807		3.6	-0.0168698	0.0168306	-0.0153286	-0.0234849	0.00439486	-0.0356442	-0.0109834	0.00028831		3.6	-0.0143006	-0.0139161	-0.0157343	-0.0131506	-0.0209459	-0.0251651	-0.00491089	-0.0131296		3.6	0.00883346	-0.00180387	0.00272928	0.0030912	0.00477042	-0.00927404	0.0191043	0.000582219
3.8	-0.00267646	-0.0336523	-0.00357341	-0.0372054	-0.0282594	-0.0256621	-0.0288967	0.0214239			3.8	-0.0109414	0.00916588	0.0268217	-0.0172525	-0.00834689	0.0057411	-0.0301883	-0.046261		3.8	-0.0077182	0.0199691	-0.0156867	-0.01757	0.00265143	-0.0360975	-0.0116029	-0.00367406		3.8	-0.0171221	-0.0159153	-0.013181	-0.0185797	-0.0173884	-0.0243282	-0.00291009	-0.0131772		3.8	0.00791062	-0.00227662	0.00231631	0.00370026	0.00821335	-0.0105822	0.0205476	0.00315834
4	-0.0021676	-0.0327887	-0.00628263	-0.0375707	-0.0299051	-0.0243803	-0.0280981	0.0241073			4	-0.00994158	0.00821176	0.0269281	-0.0220308	-0.00635991	0.00660698	-0.0285609	-0.035387		4	-0.00931883	0.0221562	-0.0173121	-0.0185251	0.00306144	-0.0382503	-0.0123433	-0.00589146		4	-0.0147893	-0.0165685	-0.013967	-0.0149815	-0.0175912	-0.0241628	-0.00450516	-0.0151058		4	0.00805214	-0.00055821	0.00416212	0.00380008	0.00779647	-0.0108707	0.0210184	0.00516613
4.2	-0.00390379	-0.0263539	-0.0187288	-0.0392954	-0.0335249	-0.0228159	-0.0295608	0.0221597			4.2	-0.00918159	0.00465784	0.0251444	-0.0191565	-0.00596289	0.00328171	-0.0272883	-0.0294482		4.2	-0.00797879	0.0172155	-0.0147284	-0.0212854	0.00199126	-0.0417131	-0.0151794	-0.00292528		4.2	-0.0124306	-0.0154151	-0.0165626	-0.0145955	-0.0235816	-0.0239682	-0.00915088	-0.0168496		4.2	0.0083042	-0.000435995	0.00111936	0.00408222	0.00840115	-0.00965939	0.0212344	0.00339859
4.4	-0.00623471	-0.0204553	-0.0115768	-0.0369613	-0.0368248	-0.0220845	-0.0268815	0.0194773			4.4	-0.00862238	0.00341553	0.0231213	-0.023567	-0.00678076	-0.00526777	-0.0287533	-0.0318002		4.4	-0.00584738	0.0126456	-0.0130159	-0.019243	0.00121519	-0.0427291	-0.0166689	0.00495684		4.4	-0.0202092	-0.0170147	-0.0164585	-0.0205076	-0.0234292	-0.0235598	-0.00671015	-0.0223643		4.4	0.0082166	-0.00102366	0.000952379	0.00554605	0.00999927	-0.00934897	0.022718	0.00572946
4.6	-0.00343543	-0.0180818	-0.0049973	-0.0387169	-0.040543	-0.0225201	-0.0280422	0.0163522			4.6	-0.0093334	0.0094513	0.0237434	-0.0221676	-0.00739163	-0.00549636	-0.0291935	-0.0414146		4.6	-0.00790924	0.0172732	-0.0136418	-0.017814	0.00471765	-0.0486912	-0.017337	0.00507281		4.6	-0.0143871	-0.0173566	-0.0160265	-0.0213066	-0.0266032	-0.0257573	-0.00293561	-0.018679		4.6	0.00847024	-0.00279113	0.000858758	0.00601493	0.00960025	-0.0101303	0.0226739	0.00583783
4.8	-0.00476092	-0.0200428	-0.0115467	-0.0369112	-0.0454992	-0.0242176	-0.027199	0.0172359			4.8	-0.0101663	0.0102455	0.0250902	-0.0214387	-0.00875854	-0.00446345	-0.0340533	-0.0513263		4.8	-0.00652208	0.0121875	-0.0134881	-0.0271697	0.00388182	-0.0542931	-0.0201137	0.00242137		4.8	-0.0125546	-0.0176048	-0.0177542	-0.0205476	-0.0213677	-0.030084	-0.00444143	-0.0165484		4.8	0.00980247	-0.00361297	0.000568699	0.00569188	0.00609715	-0.00956435	0.0208386	0.0045852
5	-0.0055482	-0.0242445	-0.0191797	-0.0370993	-0.0496754	-0.0263205	-0.027924	0.0160127			5	-0.0109461	0.0096224	0.0209798	-0.0213887	-0.0090489	-0.00788941	-0.0370394	-0.0563597		5	-0.0122168	0.0127616	-0.0138815	-0.0317475	0.00389829	-0.0548707	-0.0197728	4.17405e-05		5	-0.0185165	-0.0174431	-0.0165061	-0.0227156	-0.0239766	-0.0257253	-0.00704816	-0.0202582		5	0.00758668	-0.00536308	-0.00116907	0.00671542	0.00623918	-0.00835127	0.0224727	0.00324876
5.2	0.00031113	-0.0249121	-0.0106681	-0.0387704	-0.0513226	-0.0282939	-0.0265242	0.0130316			5.2	-0.0114333	0.0123716	0.0219826	-0.0222854	-0.0112548	-0.0115871	-0.0323811	-0.0538115		5.2	-0.011771	0.0113654	-0.015381	-0.0276305	0.00412507	-0.058474	-0.0206304	-0.00123799		5.2	-0.0196743	-0.0222466	-0.0199996	-0.0206753	-0.0256067	-0.0258491	-0.00453065	-0.0235916		5.2	0.00691388	-0.00557759	0.00150211	0.00550747	0.00657196	-0.00777421	0.0216579	0.00572222
5.4	0.00115343	-0.0265767	-0.0065575	-0.0402186	-0.0542218	-0.0312825	-0.02972	0.0139501			5.4	-0.0123199	0.0161788	0.0251352	-0.0237893	-0.00787492	-0.00649742	-0.0243465	-0.0468471		5.4	-0.0143409	0.0184888	-0.016686	-0.0196467	0.00299481	-0.0637731	-0.0208667	-0.000593727		5.4	-0.0144612	-0.0183146	-0.0167832	-0.0208437	-0.028502	-0.0225205	-0.00624462	-0.0249694		5.4	0.00699311	-0.00835759	0.00173374	0.00330787	0.00508133	-0.00647916	0.0209065	0.00411859
5.6	-0.00616252	-0.0248158	-0.0111896	-0.0398583	-0.055172	-0.0342855	-0.0324829	0.0145329			5.6	-0.012726	0.0147221	0.02147	-0.0242046	-0.0076846	-0.00556244	-0.0176898	-0.0333885		5.6	-0.0167308	0.0151156	-0.0194057	-0.0258818	0.00313537	-0.0659218	-0.0206207	0.000847569		5.6	-0.0174797	-0.018063	-0.0164541	-0.0196817	-0.0243924	-0.0269441	-0.0066885	-0.0221968		5.6	0.00626338	-0.00718276	-0.000238634	0.00244605	0.00714269	-0.00642109	0.0208537	0.00295629
5.8	-0.00220611	-0.0255158	-0.0171057	-0.0421387	-0.0529727	-0.0347774	-0.0361478	0.0138683			5.8	-0.0133917	0.0175845	0.0206665	-0.0241472	-0.0072947	-0.00712563	-0.0186954	-0.0236838		5.8	-0.0196481	0.0209183	-0.0198703	-0.0357872	0.00349259	-0.0691495	-0.0215039	0.00165267		5.8	-0.0146366	-0.0230643	-0.0162724	-0.0239445	-0.0261665	-0.0272586	-0.0102825	-0.0237701		5.8	0.00433569	-0.00542172	-0.000907812	0.00193985	0.00874088	-0.00535868	0.0226627	0.00386658
6	-0.00140185	-0.0245372	-0.0135904	-0.0422229	-0.0505911	-0.0367015	-0.037538	0.0147448			6	-0.0146183	0.0221788	0.022537	-0.0246585	-0.0114621	-0.00573798	-0.0293751	-0.0204541		6	-0.0180395	0.020537	-0.0200732	-0.029377	0.00166303	-0.0760639	-0.0205313	0.00103378		6	-0.0175293	-0.0218461	-0.0189991	-0.0182709	-0.0286317	-0.0286321	-0.00913082	-0.0283509		6	0.00485106	-0.00252016	-0.00291029	0.000410039	0.00906127	-0.00660061	0.0218898	0.000629077
6.2	-0.00461368	-0.0227469	-0.00873504	-0.0422022	-0.0472096	-0.0375665	-0.0372826	0.0146306			6.2	-0.0149983	0.0257582	0.0208714	-0.0251278	-0.0108141	-0.0010139	-0.0390785	-0.0214843		6.2	-0.0211465	0.0249768	-0.0215291	-0.0153408	0.000120809	-0.0814707	-0.0204345	0.00151221		6.2	-0.0212636	-0.0189711	-0.0182754	-0.0193567	-0.0256808	-0.0279458	-0.0120104	-0.0288063		6.2	0.00567834	-0.00325999	-0.00349564	0.000256675	0.00962651	-0.00879663	0.0216673	-0.000704386
6.4	-0.00494151	-0.0227518	-0.0130853	-0.0404322	-0.0399521	-0.0372994	-0.0358948	0.012562			6.4	-0.0163561	0.0247999	0.0177189	-0.0210657	-0.0124399	-0.00466807	-0.0425285	-0.0273382		6.4	-0.0218	0.0230034	-0.0226512	-0.0207942	-0.000723186	-0.0856144	-0.0199958	0.000784049		6.4	-0.0158213	-0.0231836	-0.0189274	-0.0227473	-0.0267585	-0.0271802	-0.00838659	-0.0246671		6.4	0.0057704	-0.00122994	-0.00428588	0.00022538	0.00939846	-0.0106845	0.0217818	0.00130183
6.6	-0.00405851	-0.0275931	-0.018264	-0.0406666	-0.0342001	-0.0362444	-0.0351906	0.0121			6.6	-0.0169375	0.0254882	0.0176786	-0.0254167	-0.0125544	-0.00559567	-0.0406446	-0.041337		6.6	-0.0194076	0.0212878	-0.0235014	-0.036404	-0.00229028	-0.0906135	-0.0229863	-0.00214084		6.6	-0.0175442	-0.0195019	-0.019502	-0.0206434	-0.029916	-0.0272439	-0.00562184	-0.025713		6.6	0.00485923	-0.00308955	-0.00478213	0.000405795	0.00901172	-0.0126366	0.0222159	0.00357034
6.8	-0.00812435	-0.0301758	-0.0164231	-0.0373178	-0.0303205	-0.037101	-0.0351796	0.0118118			6.8	-0.017721	0.0263718	0.0167065	-0.0262803	-0.0115331	-0.00668329	-0.0301023	-0.0537766		6.8	-0.0224175	0.0170662	-0.0250351	-0.0251543	-0.00331691	-0.0923661	-0.0219263	-0.00187562		6.8	-0.0205881	-0.0206697	-0.0193188	-0.0239461	-0.0292703	-0.0312923	-0.0125548	-0.0238066		6.8	0.00549201	-0.00749278	-0.00808181	-0.00040228	0.00822067	-0.0150711	0.0232143	0.00116392
7	-0.00937956	-0.023703	-0.0112665	-0.0360434	-0.0289786	-0.0373541	-0.0361334	0.0102832			7	-0.0175331	0.0295462	0.0179481	-0.0239753	-0.00814872	-0.00914079	-0.0188401	-0.0629973		7	-0.0155585	0.0160954	-0.0255001	-0.0132133	-0.00453572	-0.0941598	-0.0238835	-0.00097855		7	-0.0202292	-0.0218969	-0.0179334	-0.0264657	-0.0306774	-0.0302096	-0.00983274	-0.0237683		7	0.0058721	-0.0102174	-0.00784649	-0.000968218	0.00996439	-0.0130999	0.024516	0.0035529
7.2	-0.00641962	-0.0263164	-0.0132058	-0.0375817	-0.0305716	-0.0383571	-0.0361987	0.0119219			7.2	-0.0186754	0.0320464	0.0177304	-0.0309082	-0.00625145	-0.0129549	-0.015067	-0.0686609		7.2	-0.0181276	0.0138805	-0.0263321	-0.0304068	-0.00558247	-0.0938371	-0.0233219	-0.00109987		7.2	-0.0192145	-0.0184291	-0.0165518	-0.0259668	-0.027159	-0.0326449	-0.0120509	-0.0227552		7.2	0.00366155	-0.00793147	-0.00936036	-0.000188256	0.0079922	-0.0133838	0.0265525	0.00275887
7.4	-0.00795595	-0.0345335	-0.0151791	-0.0385081	-0.0360662	-0.0388399	-0.0402167	0.0115558			7.4	-0.0186072	0.0348235	0.0180052	-0.0307999	-0.00684872	-0.0148257	-0.0184515	-0.0705115		7.4	-0.0223356	0.0142569	-0.0274066	-0.040966	-0.00624065	-0.0943012	-0.0241258	-0.00515759		7.4	-0.0202806	-0.0200923	-0.0192791	-0.0270232	-0.0274856	-0.0296982	-0.012822	-0.0254335		7.4	0.00495865	-0.00945027	-0.0107475	-0.00052011	0.00949258	-0.0127873	0.0261682	2.71787e-06
7.6	-0.00572623	-0.0312643	-0.0171917	-0.0374913	-0.0424634	-0.039675	-0.0410755	0.0102149			7.6	-0.0188699	0.0398364	0.0186269	-0.0259349	-0.00626897	-0.0142114	-0.027106	-0.0661748		7.6	-0.0126077	0.0164555	-0.0267898	-0.0211922	-0.00764411	-0.0934456	-0.0234872	-0.00552757		7.6	-0.0171637	-0.0207944	-0.0177951	-0.0262158	-0.0313217	-0.032586	-0.0149705	-0.0273035		7.6	0.00515277	-0.0103447	-0.0090725	-0.000944658	0.00865031	-0.0111772	0.0259524	0.000429849
7.8	-0.00512891	-0.0219217	-0.0178601	-0.0409096	-0.0495586	-0.0394444	-0.0396449	0.00953471			7.8	-0.0194226	0.042539	0.0184656	-0.0321443	-0.00623089	-0.0147835	-0.0411772	-0.0615952		7.8	-0.0213231	0.0181124	-0.026296	-0.0230032	-0.00714913	-0.0950724	-0.0200669	-0.003605		7.8	-0.0196902	-0.0242925	-0.0188194	-0.0270809	-0.0284719	-0.0341972	-0.016878	-0.0290699		7.8	0.00577353	-0.0074441	-0.00537517	0.000624991	0.00789826	-0.00994788	0.0277266	0.00331321
8	-0.00530606	-0.0294971	-0.0180113	-0.0425419	-0.0537598	-0.0377355	-0.038792	0.0104161			8	-0.021743	0.0396491	0.0169437	-0.0287286	-0.00550008	-0.0130895	-0.0526235	-0.0564241		8	-0.0269372	0.0200786	-0.0275398	-0.0431694	-0.00610193	-0.0934404	-0.0231863	0.00148311		8	-0.0221793	-0.0209248	-0.0194329	-0.0286192	-0.0345887	-0.0364939	-0.0129213	-0.0271037		8	0.00614176	-0.00732431	-0.00409863	0.000956388	0.00489791	-0.00866652	0.0289837	0.00481714
8.2	-0.00635371	-0.0360847	-0.0193039	-0.0400474	-0.0567647	-0.0354464	-0.0419871	0.00814956			8.2	-0.022143	0.0375137	0.016488	-0.024508	-0.00502482	-0.0107857	-0.0548957	-0.0513416		8.2	-0.0142008	0.022249	-0.0280852	-0.0332867	-0.00409963	-0.0928036	-0.0209186	-0.00272667		8.2	-0.0204576	-0.0242387	-0.0207848	-0.0310679	-0.033094	-0.0381701	-0.0122598	-0.0299945		8.2	0.00739857	-0.00918764	-0.00362792	7.78596e-05	0.00482777	-0.00607306	0.0271207	0.00635058
8.4	-0.00748212	-0.0255641	-0.0196163	-0.0410113	-0.0560464	-0.0349819	-0.039028	0.0107604			8.4	-0.0221268	0.0364958	0.0171774	-0.0329819	-0.00553767	-0.00923593	-0.0503829	-0.0444956		8.4	-0.0223369	0.0191036	-0.0291209	-0.0173005	-0.0024471	-0.0921421	-0.0220637	-0.00733428		8.4	-0.0252803	-0.0222744	-0.0224106	-0.0289381	-0.0339257	-0.0306549	-0.0126023	-0.0283562		8.4	0.00592637	-0.00837865	-0.00448781	0.00156684	0.00440517	-0.00765349	0.0298563	0.00909516
8.6	-0.0081309	-0.0251022	-0.0220742	-0.0418471	-0.0516515	-0.0365745	-0.0391746	0.014241			8.6	-0.0235403	0.0341406	0.0169927	-0.0328129	-0.00842168	-0.0165546	-0.0403125	-0.0391646		8.6	-0.0289879	0.014091	-0.0296079	-0.0371497	-0.000812013	-0.0928686	-0.0221909	-0.00533736		8.6	-0.0203552	-0.0212017	-0.0215208	-0.0269479	-0.0333411	-0.0334277	-0.0125315	-0.0327245		8.6	0.00551565	-0.00746945	-0.00611116	0.000532959	0.00535982	-0.00822524	0.0305367	0.00725988
8.8	-0.00930197	-0.0354753	-0.0217428	-0.0399674	-0.0460142	-0.0392782	-0.0401879	0.0123229			8.8	-0.0244073	0.0364583	0.0169288	-0.0278742	-0.00760965	-0.0207403	-0.0276766	-0.0356648		8.8	-0.0137621	0.0130109	-0.0302515	-0.0450126	-0.000137922	-0.0931556	-0.0260995	-0.00256877		8.8	-0.0241688	-0.0201421	-0.0240238	-0.0257405	-0.0324099	-0.0365738	-0.0138631	-0.0336887		8.8	0.00497782	-0.00888111	-0.00801367	-0.000265609	0.00762079	-0.00627662	0.0296831	0.00446653
9	-0.00869387	-0.0303064	-0.0222367	-0.0388459	-0.0423456	-0.0428282	-0.0414695	0.00794675			9	-0.0241462	0.0364967	0.0175192	-0.0366977	-0.00850318	-0.0195861	-0.0183489	-0.030199		9	-0.0249164	0.0118405	-0.0303353	-0.026614	0.000766173	-0.0971227	-0.024521	-0.00767488		9	-0.0269556	-0.0186695	-0.0195465	-0.0283139	-0.0393874	-0.0357289	-0.0173946	-0.0299954		9	0.00415642	-0.00687744	-0.00940121	-0.00132745	0.00854144	-0.0101737	0.0285466	0.00313567
9.2	-0.010875	-0.0228127	-0.0215019	-0.0384759	-0.0384474	-0.0469333	-0.0380663	0.00940165			9.2	-0.0240751	0.0393487	0.0183718	-0.0370012	-0.00988899	-0.0243655	-0.0150949	-0.0253493		9.2	-0.0313091	0.0134063	-0.0314258	-0.0336601	-6.54788e-05	-0.0979584	-0.0259012	-0.0131368		9.2	-0.0261658	-0.0226407	-0.021882	-0.0263422	-0.0341722	-0.0328246	-0.0125628	-0.0298029		9.2	0.00324703	-0.00594933	-0.010518	-0.000513603	0.00841405	-0.0132087	0.0320987	0.00231481
9.4	-0.00777506	-0.0329423	-0.0188703	-0.0401564	-0.0407681	-0.0490851	-0.0387498	0.0072531			9.4	-0.0251009	0.0398651	0.0166472	-0.0278543	-0.009398	-0.0317905	-0.0181053	-0.0239681		9.4	-0.0185424	0.0135666	-0.0312715	-0.0533825	-0.00138677	-0.0942171	-0.027838	-0.0100217		9.4	-0.0221221	-0.0228389	-0.0200719	-0.0284683	-0.0337601	-0.034127	-0.0149349	-0.0332867		9.4	0.00382047	-0.00451436	-0.00872364	-0.00068126	0.00842623	-0.0108744	0.0306089	0.0006342
9.6	-0.00729979	-0.0370023	-0.0131038	-0.0395135	-0.0465984	-0.0502112	-0.0374366	0.00581702			9.6	-0.0244478	0.0375978	0.0149028	-0.0340382	-0.00624736	-0.0260249	-0.0237624	-0.0212595		9.6	-0.0256068	0.0170745	-0.0322489	-0.032568	-0.00152456	-0.0878095	-0.024472	-0.00520993		9.6	-0.0225527	-0.0209277	-0.0220412	-0.0311087	-0.0348383	-0.0355812	-0.0143086	-0.0350405		9.6	0.00356738	-0.00450671	-0.00807163	-0.000165808	0.00812657	-0.00805778	0.0294357	0.00100798
9.8	-0.00690198	-0.0267112	-0.0162591	-0.0400042	-0.0527581	-0.0528809	-0.0387157	0.00748248			9.8	-0.0243063	0.0324417	0.0145326	-0.0388679	-0.00756811	-0.0249845	-0.0347034	-0.0167828		9.8	-0.0345253	0.0186144	-0.0338305	-0.0274051	3.00126e-05	-0.0807302	-0.0268149	-0.00806224		9.8	-0.0269962	-0.0218855	-0.0258718	-0.0263802	-0.0310609	-0.0360144	-0.0178787	-0.0321816		9.8	0.00249137	-0.00603994	-0.00671519	-0.00128973	0.00602197	-0.00911258	0.0281567	0.00159961
10	-0.00904185	-0.0305426	-0.0255025	-0.0406358	-0.0565301	-0.0551668	-0.0382584	0.0117898			10	-0.0222586	0.0359689	0.0130642	-0.0316491	-0.00744865	-0.0317636	-0.0440879	-0.0175577		10	-0.0215313	0.0177088	-0.0353596	-0.0462461	-0.00249295	-0.0761574	-0.0243915	-0.0125302		10	-0.0251733	-0.0251757	-0.0259555	-0.0247528	-0.0308943	-0.0345158	-0.0136322	-0.0313307		10	0.00229371	-0.00726581	-0.00821773	9.42063e-05	0.00756036	-0.00753126	0.0284548	0.00213228
10.2	-0.0074505	-0.0385301	-0.0293789	-0.0388424	-0.0559513	-0.0572431	-0.0422076	0.0111484			10.2	-0.0230472	0.0358894	0.0102893	-0.0319471	-0.00844779	-0.0305409	-0.0532779	-0.0190429		10.2	-0.0228917	0.0136978	-0.0364572	-0.0353047	-0.00371636	-0.0705222	-0.0275477	-0.00717642		10.2	-0.0271935	-0.0269944	-0.0283294	-0.028716	-0.0384288	-0.0362838	-0.0141451	-0.0354703		10.2	0.00176029	-0.00870096	-0.00638925	-0.00234003	0.00629744	-0.00484701	0.0271298	0.00345151
10.4	-0.00975465	-0.0283921	-0.0272604	-0.0360711	-0.050858	-0.0598082	-0.044609	0.0120242			10.4	-0.0228486	0.0399479	0.00845766	-0.0401468	-0.0080591	-0.0298753	-0.0581993	-0.0178141		10.4	-0.035919	0.013956	-0.0367722	-0.0258018	-0.00287351	-0.0716071	-0.0250078	-0.00286721		10.4	-0.023155	-0.0245944	-0.0264904	-0.0308495	-0.0338856	-0.0363365	-0.012327	-0.0349904		10.4	0.00284258	-0.0104343	-0.0080485	-0.0046516	0.00651535	-0.00594056	0.0268128	0.00289859
10.6	-0.0119673	-0.0349294	-0.0217706	-0.0374209	-0.0463229	-0.0622224	-0.0462999	0.0110802			10.6	-0.0241533	0.0424626	0.00797068	-0.0360598	-0.00817737	-0.0338658	-0.0631186	-0.0172099		10.6	-0.0229408	0.0142086	-0.0368935	-0.0479693	-0.00578932	-0.0747833	-0.0293316	-0.0100778		10.6	-0.0261029	-0.0246999	-0.0236641	-0.031992	-0.0357104	-0.0377084	-0.0158149	-0.0332836		10.6	0.00287056	-0.0102439	-0.00841362	-0.00490332	0.00611098	-0.00796514	0.027272	0.00236773
10.8	-0.0132418	-0.0358222	-0.0157478	-0.0362625	-0.0422976	-0.0636061	-0.044873	0.0109184			10.8	-0.0233101	0.044838	0.00451023	-0.0313735	-0.0103091	-0.0352632	-0.0606835	-0.0188856		10.8	-0.0204706	0.0126762	-0.0393106	-0.0407764	-0.01071	-0.0786525	-0.0263427	-0.0140843		10.8	-0.0236438	-0.0275881	-0.0281901	-0.0302418	-0.0408744	-0.0383342	-0.0186641	-0.0385766		10.8	0.00408349	-0.00747274	-0.0125805	-0.0042644	0.00752194	-0.00870699	0.0278148	0.000780172
11	-0.00965059	-0.0417095	-0.0152384	-0.0353891	-0.0423491	-0.0677606	-0.0461255	0.00903141			11	-0.0247269	0.0436837	0.00505839	-0.0348069	-0.010497	-0.0324485	-0.0539299	-0.0174741		11	-0.0344973	0.00865848	-0.0393377	-0.0342223	-0.0112565	-0.0779325	-0.0287387	-0.00976273		11	-0.0282295	-0.0260072	-0.0229656	-0.0305538	-0.0395967	-0.0408863	-0.0181923	-0.0367197		11	0.00365241	-0.0075512	-0.010998	-0.00446244	0.00569549	-0.009779	0.027612	-0.000615793
11.2	-0.00958261	-0.0325282	-0.0258362	-0.0377486	-0.0494605	-0.0716855	-0.0462168	0.00874812			11.2	-0.0242624	0.0414876	0.00562422	-0.0409299	-0.00950536	-0.032162	-0.0464417	-0.0165797		11.2	-0.0289668	0.0122125	-0.0391798	-0.0513519	-0.0138441	-0.0824485	-0.0256558	-0.0113526		11.2	-0.0270017	-0.0214939	-0.0265843	-0.0294841	-0.0406094	-0.0424502	-0.0174218	-0.0381192		11.2	0.00438934	-0.00837558	-0.0150659	-0.00313201	0.00721005	-0.0128225	0.0274919	-0.000737465
11.4	-0.00747995	-0.046858	-0.0355938	-0.0362307	-0.0563306	-0.072928	-0.0453105	0.00803595			11.4	-0.0247555	0.0397888	0.00633936	-0.0375128	-0.0106064	-0.0294163	-0.036682	-0.0172301		11.4	-0.0153212	0.0121616	-0.0399759	-0.044271	-0.015803	-0.0837725	-0.0288412	-0.0218903		11.4	-0.0274768	-0.0269461	-0.0227398	-0.0287116	-0.0399977	-0.0389939	-0.0161554	-0.0331557		11.4	0.00281486	-0.00688779	-0.0152413	-0.00175614	0.00477021	-0.0110587	0.0288923	-0.000551304
11.6	-0.00606765	-0.031892	-0.0384679	-0.0336631	-0.0586865	-0.0736801	-0.0484366	0.00696467			11.6	-0.0242129	0.0398427	0.00718543	-0.0353898	-0.011969	-0.0279627	-0.0250996	-0.0167255		11.6	-0.0266851	0.00930468	-0.0409009	-0.0363986	-0.0171298	-0.0853599	-0.0258141	-0.0230893		11.6	-0.0245015	-0.0251207	-0.0261603	-0.0291203	-0.0353219	-0.0429937	-0.0164692	-0.0325003		11.6	0.00186524	-0.00706384	-0.0175111	-0.00205811	0.0032078	-0.0110189	0.0299526	1.81815e-05
11.8	-0.00389775	-0.0441988	-0.0338302	-0.0362372	-0.058372	-0.0730951	-0.0498117	0.00652506			11.8	-0.0257602	0.0385324	0.00899969	-0.0409177	-0.0122469	-0.0274289	-0.0177482	-0.0165096		11.8	-0.0314824	0.00709922	-0.0390542	-0.0520062	-0.0176601	-0.0891652	-0.0293166	-0.0190208		11.8	-0.0293324	-0.0255955	-0.0249024	-0.0318988	-0.033108	-0.0438332	-0.0171911	-0.0377192		11.8	0.000291831	-0.00654777	-0.0158551	-0.00228055	0.00193317	-0.00984908	0.0319351	0.00166877
12	-0.00701461	-0.0316812	-0.0261177	-0.0367967	-0.0541361	-0.0720736	-0.0482348	0.00912835			12	-0.0268079	0.0355506	0.006927	-0.0435163	-0.0124581	-0.0282651	-0.0140814	-0.0183686		12	-0.0174042	0.00790095	-0.0394954	-0.0407273	-0.0189503	-0.0924173	-0.0273986	-0.0256582		12	-0.0301593	-0.0290714	-0.027864	-0.0350504	-0.0401799	-0.0384467	-0.0174887	-0.039501		12	0.000782881	-0.0110073	-0.0171172	-0.00420473	0.00349255	-0.00911318	0.0309783	0.00225237
12.2	-0.00864313	-0.0454341	-0.0167582	-0.0346323	-0.0502034	-0.0716571	-0.0479755	0.0102733			12.2	-0.0290057	0.0354183	0.00543489	-0.0373581	-0.0125378	-0.0284302	-0.0095505	-0.0200565		12.2	-0.0193104	0.00522238	-0.039885	-0.0380443	-0.0193706	-0.0992719	-0.0302685	-0.0322079		12.2	-0.0306982	-0.0237845	-0.0287963	-0.033558	-0.0393365	-0.0420527	-0.0158656	-0.0370645		12.2	-0.000562798	-0.0134111	-0.0176246	-0.00513987	0.00337324	-0.00874883	0.0299467	-0.000908833
12.4	-0.0101186	-0.0325674	-0.0176703	-0.0392178	-0.0491004	-0.0713947	-0.0478505	0.00718652			12.4	-0.029052	0.0295604	0.00561654	-0.0353616	-0.0130237	-0.0330086	-0.0118825	-0.0200515		12.4	-0.0363102	0.00547461	-0.0405009	-0.053936	-0.0211919	-0.103278	-0.0280299	-0.0254662		12.4	-0.0268922	-0.030107	-0.0244738	-0.0332123	-0.0404911	-0.0380847	-0.0181507	-0.0355637		12.4	-0.000338744	-0.0167218	-0.0186006	-0.00514737	0.00433634	-0.012068	0.0310533	-0.00109338
12.6	-0.0114328	-0.044609	-0.0278091	-0.0410424	-0.0533178	-0.0706267	-0.0461485	0.00874133			12.6	-0.0298214	0.0263155	0.00566518	-0.0400481	-0.0138598	-0.0344769	-0.0141691	-0.0215046		12.6	-0.0274631	0.00654944	-0.0412988	-0.0411629	-0.0220404	-0.110551	-0.0308068	-0.0214674		12.6	-0.0269429	-0.0262895	-0.0281227	-0.0357645	-0.0406423	-0.0392872	-0.0155391	-0.0436938		12.6	0.000410638	-0.0180401	-0.0170866	-0.00516372	0.00637701	-0.0120973	0.0304445	-0.00213811
12.8	-0.0110083	-0.0383627	-0.0401041	-0.0395022	-0.0582912	-0.0711097	-0.0458299	0.00866667			12.8	-0.0289269	0.0284563	0.00275575	-0.0422258	-0.0128688	-0.0360486	-0.0188831	-0.0235997		12.8	-0.0187142	0.00672648	-0.0428478	-0.0440952	-0.0215083	-0.118323	-0.0276876	-0.0281959		12.8	-0.0265768	-0.0272433	-0.0271147	-0.0328551	-0.0378113	-0.0404511	-0.0156499	-0.0379493		12.8	0.00127102	-0.0216967	-0.0187799	-0.00474889	0.00671372	-0.0147003	0.0291821	-0.000846751
13	-0.00949086	-0.043503	-0.0455561	-0.0369597	-0.0606367	-0.0709264	-0.0495274	0.00631938			13	-0.0288092	0.0282877	0.00102439	-0.0386541	-0.0140523	-0.0379074	-0.0261388	-0.0256207		13	-0.0264226	0.00726997	-0.042438	-0.0574228	-0.0219435	-0.12955	-0.0321394	-0.0241012		13	-0.0281705	-0.0281603	-0.0269758	-0.0344812	-0.0403026	-0.0421868	-0.0233582	-0.0385493		13	-0.000112656	-0.0199542	-0.018641	-0.00534282	0.00577455	-0.0171218	0.0304136	-0.0016844
13.2	-0.0114081	-0.0413309	-0.0449474	-0.0361378	-0.0580364	-0.0716019	-0.0479326	0.00375717			13.2	-0.0271697	0.0268228	0.002772	-0.0368112	-0.0171434	-0.0398552	-0.0335982	-0.0271129		13.2	-0.0364428	0.00496332	-0.0425959	-0.0450482	-0.0211201	-0.13611	-0.0291034	-0.0144561		13.2	-0.0308782	-0.0287957	-0.0267069	-0.0360895	-0.0390657	-0.0445161	-0.0198346	-0.0414977		13.2	0.0013329	-0.0151064	-0.0188715	-0.00594967	0.00530369	-0.0162543	0.0314236	0.000634194
13.4	-0.0117718	-0.0411211	-0.0374289	-0.0328568	-0.0542843	-0.073556	-0.0484494	0.0059518			13.4	-0.0283126	0.0256887	0.00161798	-0.03913	-0.0168104	-0.0389719	-0.0393809	-0.0315652		13.4	-0.0222394	0.00461456	-0.0431427	-0.0491112	-0.0203022	-0.145824	-0.0322697	-0.0208132		13.4	-0.0304689	-0.0214712	-0.0248532	-0.0347489	-0.0392455	-0.0438327	-0.0204657	-0.0425048		13.4	0.000235417	-0.0135294	-0.0173806	-0.00608781	0.00573984	-0.0150059	0.0307322	0.00113316
13.6	-0.0106602	-0.0441054	-0.02515	-0.0324675	-0.0509937	-0.0747788	-0.0497155	0.005474			13.6	-0.0277466	0.0291104	0.00194228	-0.0416689	-0.016081	-0.0400837	-0.0485166	-0.0373711		13.6	-0.0202772	0.00628747	-0.0431807	-0.0579228	-0.0205207	-0.149595	-0.0295824	-0.025424		13.6	-0.0313737	-0.0289624	-0.0276749	-0.0352615	-0.0420021	-0.0456798	-0.0217146	-0.0367617		13.6	0.00182759	-0.0140752	-0.0173189	-0.00653598	0.00423585	-0.0169862	0.0316351	0.000969846
13.8	-0.0144448	-0.0370155	-0.019113	-0.031203	-0.0528021	-0.0749729	-0.0517276	0.00409292			13.8	-0.0292864	0.0286746	0.00295492	-0.0410504	-0.0179848	-0.0396611	-0.0541561	-0.041497		13.8	-0.0332359	0.00663637	-0.0427415	-0.045648	-0.0225936	-0.151005	-0.0323633	-0.0165894		13.8	-0.0299266	-0.0295446	-0.0313566	-0.034248	-0.041908	-0.0432427	-0.0218787	-0.0440698		13.8	0.000650537	-0.0117766	-0.0178039	-0.00774524	0.00519029	-0.0161903	0.032829	0.00136244
14	-0.0163601	-0.0467673	-0.022714	-0.0332331	-0.0577788	-0.0771639	-0.0496634	0.00359239			14	-0.0305859	0.0254919	0.00285972	-0.0399925	-0.0166552	-0.0436109	-0.0570123	-0.0462496		14	-0.0385759	0.0076316	-0.0444761	-0.0523083	-0.024315	-0.149874	-0.0292042	-0.018281		14	-0.0283912	-0.0260099	-0.0322795	-0.036676	-0.0405115	-0.0434156	-0.0214941	-0.0432732		14	0.000676349	-0.0103451	-0.0204925	-0.00716027	0.00281563	-0.0145404	0.0326387	-0.00140226
14.2	-0.0165174	-0.034877	-0.0334491	-0.036082	-0.0609187	-0.0789264	-0.0520095	0.00510077			14.2	-0.0308867	0.0236802	0.000158735	-0.0421481	-0.0132394	-0.0451002	-0.0614711	-0.0529753		14.2	-0.0251702	0.00905958	-0.0444	-0.0519259	-0.0270177	-0.142497	-0.0323486	-0.0254078		14.2	-0.0326985	-0.0249844	-0.0270259	-0.0338928	-0.0428409	-0.0462889	-0.0190588	-0.0430727		14.2	0.000861395	-0.0121492	-0.019228	-0.0079138	0.00391082	-0.0138849	0.0332423	-0.00411755
14.4	-0.0155504	-0.0483937	-0.0456109	-0.0367866	-0.060338	-0.0808335	-0.0524595	0.00842561			14.4	-0.0322003	0.0286626	0.000856263	-0.0463747	-0.01309	-0.0425506	-0.0645926	-0.0573627		14.4	-0.0242471	0.00881422	-0.0454463	-0.0459794	-0.0298159	-0.138863	-0.0286441	-0.0215332		14.4	-0.0261066	-0.0277305	-0.0298449	-0.0324318	-0.0398381	-0.0441335	-0.0189182	-0.0431862		14.4	0.00150563	-0.0103999	-0.0202957	-0.00896433	0.00166603	-0.0150738	0.0323175	-0.00520065
14.6	-0.0162171	-0.0349567	-0.0555785	-0.0362087	-0.0587555	-0.0850725	-0.0512696	0.00843892			14.6	-0.0335309	0.0273651	-0.000820475	-0.0464972	-0.0131572	-0.0404028	-0.0666047	-0.0611201		14.6	-0.0349184	0.00671657	-0.0452749	-0.0538175	-0.0307522	-0.137381	-0.0309407	-0.0179389		14.6	-0.033381	-0.0311488	-0.0316374	-0.034943	-0.0407525	-0.044778	-0.0236528	-0.041682		14.6	-0.000641103	-0.00979692	-0.0207375	-0.00938834	0.00350188	-0.0131508	0.0337846	-0.00437391
14.8	-0.0168018	-0.0465698	-0.0548097	-0.0377136	-0.0571237	-0.0890562	-0.0515973	0.0130494			14.8	-0.0349005	0.0252491	-0.00181053	-0.0446761	-0.010191	-0.0399941	-0.0680904	-0.066322		14.8	-0.0366244	0.00597521	-0.0465446	-0.0492672	-0.0320645	-0.137061	-0.0284287	-0.0279461		14.8	-0.0326656	-0.0300698	-0.0258379	-0.037894	-0.0460962	-0.0458636	-0.0215806	-0.0395625		14.8	0.00110148	-0.011076	-0.0207146	-0.00961295	0.00115402	-0.0128518	0.0314371	-0.00724135
15	-0.0158029	-0.0340819	-0.0440629	-0.0373902	-0.056932	-0.0925314	-0.0541817	0.0137685			15	-0.0341704	0.0287265	0.000375657	-0.0437432	-0.0128994	-0.0409025	-0.0693186	-0.0695226		15	-0.025851	0.00469283	-0.0470311	-0.0506192	-0.0321748	-0.139692	-0.0294283	-0.0292909		15	-0.0308647	-0.0290766	-0.0322455	-0.0361628	-0.0443599	-0.0466126	-0.0190434	-0.0437317		15	0.00104074	-0.0107303	-0.0195525	-0.00941879	0.00346168	-0.0144594	0.0330021	-0.00629468
15.2	-0.0147397	-0.0433665	-0.0335163	-0.0355334	-0.0597785	-0.0953532	-0.0555038	0.0131677			15.2	-0.0343436	0.0315473	0.00128875	-0.0439742	-0.0126301	-0.0362195	-0.0694907	-0.0720569		15.2	-0.0267694	0.0042889	-0.0472648	-0.0570331	-0.0313751	-0.148018	-0.0287441	-0.0230755		15.2	-0.0304684	-0.0280589	-0.0319852	-0.0403953	-0.0442386	-0.0482903	-0.0188325	-0.0436308		15.2	0.00124551	-0.0107024	-0.0193845	-0.00877492	0.00151291	-0.0144158	0.0329865	-0.00540966
15.4	-0.017824	-0.0377785	-0.0232094	-0.033847	-0.061811	-0.0996066	-0.0568954	0.0115401			15.4	-0.0344924	0.0305648	-0.000341604	-0.0438748	-0.0120688	-0.0414316	-0.0682712	-0.0766003		15.4	-0.0350019	0.00324154	-0.0474651	-0.0510858	-0.030857	-0.155898	-0.0297621	-0.0273865		15.4	-0.0316768	-0.0273454	-0.0329195	-0.0406446	-0.0486856	-0.0492465	-0.0231303	-0.0420904		15.4	-1.35205e-05	-0.0131242	-0.0212543	-0.00936196	0.00452307	-0.0133194	0.0324843	-0.00564457
15.6	-0.0175947	-0.0436351	-0.0200013	-0.0318716	-0.0594552	-0.102672	-0.058928	0.0116649			15.6	-0.0341471	0.0298878	-0.00158671	-0.0461205	-0.0112143	-0.0394432	-0.0678309	-0.0794899		15.6	-0.0402668	0.00225042	-0.049335	-0.0567858	-0.0313013	-0.162933	-0.030608	-0.0312908		15.6	-0.0308569	-0.032492	-0.0333698	-0.0403472	-0.0466705	-0.0472602	-0.0206158	-0.046893		15.6	0.000715904	-0.0133777	-0.0239581	-0.010157	0.00274076	-0.0137805	0.0310066	-0.00722764
15.8	-0.0144579	-0.0436821	-0.0280901	-0.0316309	-0.0576184	-0.104826	-0.0602838	0.00984067			15.8	-0.032818	0.028345	0.00115799	-0.0450729	-0.0104165	-0.0355657	-0.0653479	-0.0804112		15.8	-0.0317763	0.00385198	-0.0510229	-0.0577833	-0.0301271	-0.169261	-0.0307897	-0.0234931		15.8	-0.0361284	-0.0311401	-0.0311849	-0.036296	-0.0464543	-0.0498323	-0.0218707	-0.0489494		15.8	-0.000178244	-0.0126817	-0.0217227	-0.00991783	0.00524578	-0.0138086	0.0319808	-0.00599221
16	-0.0142585	-0.0439663	-0.04387	-0.031355	-0.0579154	-0.106612	-0.0588446	0.00958111			16	-0.0331743	0.0269104	-0.00046579	-0.0474886	-0.0084053	-0.0290296	-0.0643378	-0.0800548		16	-0.0307449	0.0034257	-0.0516696	-0.0544301	-0.0312378	-0.17479	-0.03261	-0.0236634		16	-0.030332	-0.0311375	-0.0332531	-0.0397982	-0.0490748	-0.0484651	-0.0218666	-0.0457763		16	-0.000279089	-0.011729	-0.0224503	-0.0107373	0.00462325	-0.0108265	0.0308803	-0.00408723
16.2	-0.0130097	-0.0496928	-0.0533128	-0.0338091	-0.0602137	-0.108077	-0.0590396	0.0108893			16.2	-0.0330905	0.0258146	0.000638801	-0.049763	-0.00918107	-0.0306271	-0.0615858	-0.0768125		16.2	-0.0376167	0.00259821	-0.0540491	-0.0578314	-0.0324616	-0.175546	-0.0308504	-0.0310722		16.2	-0.0356923	-0.0295955	-0.0292371	-0.0410959	-0.0461723	-0.0466963	-0.0236726	-0.0448838		16.2	-0.00188707	-0.0127566	-0.0240456	-0.0108079	0.00507165	-0.0114067	0.0309489	-0.00549052
16.4	-0.0127564	-0.0414179	-0.0582897	-0.0377222	-0.0637871	-0.109671	-0.0594408	0.0104497			16.4	-0.0335226	0.0255634	0.00386148	-0.0521904	-0.00848035	-0.0241313	-0.0592895	-0.0691972		16.4	-0.0451616	0.00155809	-0.0554974	-0.0524189	-0.0332808	-0.17354	-0.0336279	-0.0254693		16.4	-0.0299225	-0.0298672	-0.0318707	-0.0414359	-0.0438086	-0.048967	-0.0216441	-0.0498382		16.4	-0.00210168	-0.0117062	-0.0240025	-0.0115406	0.00262611	-0.0122259	0.0315227	-0.00568798
16.6	-0.0127052	-0.0503746	-0.0534518	-0.0402089	-0.0649417	-0.112042	-0.0598834	0.0110087			16.6	-0.0344808	0.0259018	0.00548373	-0.0501294	-0.00949371	-0.0263738	-0.0573316	-0.0592342		16.6	-0.0376007	0.00157753	-0.0556505	-0.0539585	-0.0340166	-0.170422	-0.0300611	-0.0198346		16.6	-0.0341897	-0.028787	-0.0319726	-0.0407502	-0.0489725	-0.0473173	-0.0228798	-0.0455905		16.6	-0.00314832	-0.011689	-0.0226287	-0.0122179	0.00332932	-0.0129301	0.0317808	-0.00636524
16.8	-0.0147376	-0.0387255	-0.0431855	-0.0389113	-0.0626264	-0.114382	-0.0569214	0.0101659			16.8	-0.034687	0.027209	0.00361541	-0.0507588	-0.0114636	-0.0282238	-0.0572707	-0.0488144		16.8	-0.0328456	-0.000394423	-0.0550178	-0.0558413	-0.0344729	-0.167441	-0.0329549	-0.026738		16.8	-0.0318493	-0.0327397	-0.0298656	-0.039881	-0.0514207	-0.0500089	-0.02428	-0.0440786		16.8	-0.003609	-0.0135952	-0.0246822	-0.0119204	-0.000312784	-0.0134698	0.0326969	-0.00451968
17	-0.0167153	-0.0512841	-0.0300001	-0.0386985	-0.0608529	-0.117334	-0.0558733	0.00917009			17	-0.0359017	0.0272379	0.00324684	-0.0498443	-0.0113534	-0.0326875	-0.0562908	-0.0366403		17	-0.0343411	-0.00182602	-0.0570632	-0.0509316	-0.0343583	-0.165743	-0.0299731	-0.023546		17	-0.0343976	-0.0307889	-0.0350058	-0.042502	-0.0489723	-0.0485536	-0.0188282	-0.0492604		17	-0.0030344	-0.0179939	-0.0252348	-0.0115877	0.000244915	-0.0154941	0.0336822	-0.00609335
17.2	-0.0179381	-0.0385943	-0.0238877	-0.0388763	-0.0611078	-0.120112	-0.0535287	0.0100738			17.2	-0.0373168	0.026101	0.00276556	-0.0491127	-0.0121625	-0.0326222	-0.0576184	-0.0283532		17.2	-0.0389675	-0.00266038	-0.0570105	-0.0559205	-0.0364606	-0.165797	-0.0314342	-0.0160155		17.2	-0.0358837	-0.0314158	-0.0325297	-0.0447391	-0.0485891	-0.0505265	-0.0214346	-0.0435827		17.2	-0.00390561	-0.0175935	-0.0237544	-0.0110204	0.000485711	-0.0171413	0.0344652	-0.0032116
17.4	-0.0161373	-0.0515728	-0.0248077	-0.0398622	-0.0616964	-0.122475	-0.052344	0.0101557			17.4	-0.0353674	0.0256158	-0.000531295	-0.047607	-0.014088	-0.0336568	-0.0585501	-0.0221035		17.4	-0.0371311	-0.00133991	-0.0574269	-0.0567335	-0.0377153	-0.165887	-0.0305996	-0.0230604		17.4	-0.0348173	-0.031283	-0.0337784	-0.0435473	-0.0437258	-0.0524888	-0.0253646	-0.0489525		17.4	-0.00264933	-0.0194036	-0.0238055	-0.0101611	0.00206179	-0.0174303	0.0347538	-0.000890894
17.6	-0.0167878	-0.038793	-0.0362396	-0.0355747	-0.0645032	-0.125983	-0.0511631	0.00802394			17.6	-0.0343732	0.0264656	-0.00138506	-0.0508519	-0.013664	-0.0327818	-0.0597528	-0.0205524		17.6	-0.0316118	-0.00410433	-0.05861	-0.0566172	-0.0375645	-0.167341	-0.0333948	-0.026375		17.6	-0.0322652	-0.0319562	-0.032206	-0.039224	-0.0491492	-0.0521711	-0.024149	-0.0434866		17.6	-0.00295635	-0.0181262	-0.0255943	-0.00859987	0.000837548	-0.0149091	0.0352234	0.00120567
17.8	-0.0154865	-0.0497701	-0.0481157	-0.0356863	-0.0650998	-0.129348	-0.0544591	0.00561443			17.8	-0.0350155	0.024809	-0.00257046	-0.0548981	-0.0127211	-0.0329123	-0.0611976	-0.0204898		17.8	-0.0320007	-0.00433457	-0.0586829	-0.0605929	-0.0379375	-0.165863	-0.0336314	-0.0194955		17.8	-0.0301343	-0.0348164	-0.0325912	-0.0445261	-0.0504129	-0.0517208	-0.0206589	-0.0471476		17.8	-0.00403447	-0.0156758	-0.0281887	-0.0104232	0.00394797	-0.0162102	0.0350997	-0.000928886
18	-0.0149164	-0.0397774	-0.0597813	-0.0369445	-0.065348	-0.131798	-0.057885	0.00508519			18	-0.0341306	0.0222157	-0.00248696	-0.0559075	-0.0150166	-0.0301889	-0.0608837	-0.0254844		18	-0.0351526	-0.00371068	-0.0578289	-0.0598127	-0.0397217	-0.163833	-0.0322922	-0.0254894		18	-0.0348603	-0.0330836	-0.0303983	-0.0413557	-0.0514973	-0.0498745	-0.0257497	-0.0524951		18	-0.00479333	-0.0132305	-0.0294572	-0.00995658	0.0033951	-0.0165423	0.0339864	-0.00383926
18.2	-0.014335	-0.0475678	-0.0620388	-0.0371726	-0.0645796	-0.135666	-0.061613	0.00501253			18.2	-0.0354031	0.0201737	-0.00188176	-0.0556026	-0.0132062	-0.0307247	-0.0603726	-0.0315956		18.2	-0.0378018	-0.00490204	-0.0581507	-0.0630198	-0.0398124	-0.160686	-0.0337443	-0.0319201		18.2	-0.0379921	-0.0341796	-0.0320772	-0.0400394	-0.0497363	-0.054304	-0.0262971	-0.0518595		18.2	-0.00407572	-0.0148887	-0.030201	-0.0120713	0.00303885	-0.0131832	0.0329774	-0.00354268
18.4	-0.0153908	-0.0430882	-0.0591021	-0.0331102	-0.0647355	-0.139113	-0.0634618	0.00161492			18.4	-0.0363257	0.0176251	-0.00112568	-0.0538722	-0.0123585	-0.0308692	-0.0606958	-0.0382324		18.4	-0.0363265	-0.00552363	-0.0575786	-0.0626706	-0.0395849	-0.159936	-0.0339186	-0.0240432		18.4	-0.0362359	-0.0352989	-0.0342697	-0.0411668	-0.0542118	-0.0573739	-0.0258527	-0.0535476		18.4	-0.00423005	-0.0115156	-0.0308196	-0.0118946	0.00220279	-0.0124403	0.0327956	-0.00547763
18.6	-0.0163682	-0.0446615	-0.0483317	-0.036972	-0.0629546	-0.143214	-0.0644703	0.000742995			18.6	-0.0383142	0.0135048	-0.00254039	-0.0520702	-0.0136239	-0.0319354	-0.0610944	-0.0456368		18.6	-0.0351877	-0.00310504	-0.0575484	-0.0615052	-0.0406661	-0.160686	-0.0319869	-0.0277466		18.6	-0.0380228	-0.0347645	-0.0312895	-0.0430976	-0.0545507	-0.0547137	-0.0218951	-0.0527338		18.6	-0.00332898	-0.0114568	-0.0289554	-0.0123072	0.000842146	-0.0144543	0.0324476	-0.00633929
18.8	-0.019579	-0.0471404	-0.0355603	-0.0382158	-0.0618555	-0.146659	-0.0644648	0.00411753			18.8	-0.0383663	0.0166802	-0.00269407	-0.0531097	-0.0154465	-0.0336736	-0.0588104	-0.0552926		18.8	-0.0378425	-0.0042365	-0.0589183	-0.0607983	-0.0425921	-0.161489	-0.0317988	-0.0351951		18.8	-0.0363143	-0.0350864	-0.0329146	-0.0409889	-0.0470482	-0.0531163	-0.0245969	-0.0559306		18.8	-0.00263926	-0.0110155	-0.0263431	-0.0120292	0.000185257	-0.0129552	0.0323141	-0.00682163
19	-0.0191422	-0.0428827	-0.0260411	-0.0384337	-0.061749	-0.148084	-0.0654522	0.00509556			19	-0.0395883	0.0210531	-0.00411508	-0.0569118	-0.0152514	-0.0317745	-0.0577289	-0.0637941		19	-0.0414107	-0.00587924	-0.0595789	-0.0600603	-0.0426621	-0.164134	-0.0330231	-0.0289696		19	-0.0363891	-0.0349489	-0.0354191	-0.0428773	-0.0512666	-0.0532536	-0.0253252	-0.0523023		19	-0.00193466	-0.00923074	-0.0238576	-0.0126936	2.27269e-05	-0.012127	0.0319365	-0.00580248
19.2	-0.0221737	-0.0490686	-0.0255346	-0.0375761	-0.0622579	-0.149501	-0.0653938	0.00284873			19.2	-0.0404828	0.0244561	-0.00413965	-0.0566048	-0.0195215	-0.0343323	-0.0549494	-0.0694306		19.2	-0.0443585	-0.00443178	-0.0598784	-0.0610527	-0.0422242	-0.167476	-0.0313615	-0.0309165		19.2	-0.03552	-0.0326348	-0.0367798	-0.0461406	-0.0526635	-0.0561126	-0.0248628	-0.0513164		19.2	-0.00125637	-0.0107786	-0.0240692	-0.0121329	0.000428514	-0.0132663	0.0311885	-0.00824478
19.4	-0.0224341	-0.0417877	-0.032448	-0.0398412	-0.0626782	-0.152621	-0.0652746	0.00567604			19.4	-0.0413102	0.0273834	-0.00766901	-0.0548286	-0.0188926	-0.0347743	-0.0542765	-0.0751281		19.4	-0.0403181	-0.00718191	-0.0604627	-0.0607293	-0.0426971	-0.170545	-0.028881	-0.0393668		19.4	-0.0363686	-0.0326064	-0.0351006	-0.0433092	-0.0505904	-0.0554466	-0.0283654	-0.0522548		19.4	-0.000954964	-0.0136288	-0.0232039	-0.0140883	0.000802469	-0.0134426	0.0312611	-0.00795378
19.6	-0.0244109	-0.0510684	-0.0463106	-0.0397369	-0.0620421	-0.153807	-0.0654298	0.0061072			19.6	-0.040135	0.0313842	-0.00952262	-0.0523527	-0.0177359	-0.0367936	-0.0509215	-0.0752288		19.6	-0.0409463	-0.00809656	-0.060379	-0.0628439	-0.0431022	-0.173481	-0.0318676	-0.0352541		19.6	-0.0380553	-0.034743	-0.0343664	-0.0461796	-0.0524857	-0.0568393	-0.0232697	-0.0518518		19.6	-0.00205488	-0.0135645	-0.0252412	-0.0143478	-0.000271507	-0.0121965	0.0301567	-0.00928229
19.8	-0.0226195	-0.0420616	-0.0605909	-0.0387976	-0.064098	-0.155589	-0.0632945	0.00490164			19.8	-0.0408781	0.0280394	-0.0122956	-0.0534924	-0.0178338	-0.0372489	-0.0497863	-0.0706799		19.8	-0.0417927	-0.00868723	-0.0611673	-0.0667665	-0.0420078	-0.176072	-0.0304659	-0.0368039		19.8	-0.0407597	-0.0359863	-0.0374241	-0.0438515	-0.0527442	-0.0560312	-0.0278596	-0.0544673		19.8	-0.00369623	-0.0149303	-0.0251053	-0.014041	-0.00114628	-0.0105519	0.0288018	-0.0118197
20	-0.0214524	-0.0494446	-0.0681041	-0.0354151	-0.0657945	-0.157585	-0.0614844	0.000654756			20	-0.0411793	0.0296698	-0.0147364	-0.0556754	-0.0168291	-0.0414111	-0.0509416	-0.0614979		20	-0.0468601	-0.00875877	-0.0612262	-0.0689376	-0.0420079	-0.178779	-0.031614	-0.041083		20	-0.0410968	-0.0310704	-0.0342167	-0.049797	-0.0523623	-0.0547268	-0.0263005	-0.0557969		20	-0.00393637	-0.0172083	-0.0255385	-0.0156727	-0.0029143	-0.0116851	0.0298525	-0.00936151
20.2	-0.0171194	-0.0460703	-0.0687775	-0.0347816	-0.0652061	-0.15911	-0.0608863	-0.00047094			20.2	-0.0405281	0.0304136	-0.0186989	-0.0580159	-0.014305	-0.0419633	-0.0519283	-0.0491406		20.2	-0.0453799	-0.00967667	-0.0607062	-0.0661077	-0.0417671	-0.181702	-0.0325458	-0.0347555		20.2	-0.0393002	-0.0351463	-0.036303	-0.0482463	-0.05184	-0.0544149	-0.0318422	-0.0558411		20.2	-0.00448761	-0.0144415	-0.0257324	-0.0160739	-0.00284061	-0.0136209	0.0296116	-0.00929311
20.4	-0.0176845	-0.0470867	-0.060142	-0.0332123	-0.0613648	-0.160493	-0.0622435	-0.00214816			20.4	-0.0396512	0.0274285	-0.0190476	-0.0576255	-0.0146299	-0.0451952	-0.0525121	-0.0363999		20.4	-0.041867	-0.00689093	-0.0609083	-0.0678376	-0.0422698	-0.183152	-0.0325596	-0.0361227		20.4	-0.0368089	-0.0323354	-0.0359497	-0.0468213	-0.0563537	-0.0568156	-0.0249207	-0.0568934		20.4	-0.00523679	-0.0128392	-0.0247449	-0.014223	-0.00433888	-0.0134125	0.0287761	-0.0103238
20.6	-0.0160441	-0.0493749	-0.0475059	-0.0313106	-0.0634076	-0.16336	-0.063129	-0.00394393			20.6	-0.0408635	0.0257842	-0.0199668	-0.054459	-0.0164189	-0.0441332	-0.0562433	-0.0313975		20.6	-0.0424179	-0.0073966	-0.0603577	-0.0680193	-0.0430416	-0.183558	-0.0316965	-0.0389684		20.6	-0.0369688	-0.0362702	-0.0405362	-0.050264	-0.0562793	-0.0556141	-0.029654	-0.0553546		20.6	-0.00441345	-0.0142595	-0.0245137	-0.0149102	-0.001592	-0.0158185	0.0292	-0.0126743
20.8	-0.0170807	-0.0453325	-0.0348013	-0.0296118	-0.0666643	-0.16225	-0.0655314	-0.00792545			20.8	-0.0401684	0.0294959	-0.0200223	-0.0536008	-0.0150709	-0.0456423	-0.0602885	-0.031132		20.8	-0.0431346	-0.00696167	-0.0595927	-0.0617322	-0.0440329	-0.187499	-0.0314537	-0.0316024		20.8	-0.0397563	-0.0330741	-0.0365345	-0.0491803	-0.05594	-0.0583849	-0.0289816	-0.0569617		20.8	-0.00309429	-0.0156801	-0.0254057	-0.0155605	-0.00326945	-0.0180715	0.0314998	-0.00888095
21	-0.0205068	-0.0529308	-0.0260935	-0.0328144	-0.0685995	-0.163506	-0.0686973	-0.00730143			21	-0.0394321	0.0287732	-0.0212167	-0.0553022	-0.0145018	-0.0453813	-0.0627199	-0.0349883		21	-0.0452026	-0.00664432	-0.058241	-0.065859	-0.0426652	-0.187236	-0.0308132	-0.0329591		21	-0.0417351	-0.0326764	-0.0387366	-0.0486719	-0.0547284	-0.0582821	-0.0298106	-0.0592255		21	-0.00413717	-0.0185005	-0.0278418	-0.0139731	-0.00156582	-0.016879	0.0302965	-0.0093877
21.2	-0.0251677	-0.044327	-0.0255654	-0.0331737	-0.0666718	-0.165362	-0.0703523	-0.00788046			21.2	-0.0390997	0.0293435	-0.0239719	-0.0581897	-0.0139717	-0.0451592	-0.0660897	-0.0457038		21.2	-0.042801	-0.0072359	-0.058855	-0.0633895	-0.0427285	-0.188205	-0.0317758	-0.0373567		21.2	-0.0434338	-0.0379425	-0.0390874	-0.0498187	-0.0579616	-0.0609216	-0.0276018	-0.0551457		21.2	-0.00250814	-0.0184117	-0.0283487	-0.0142107	-0.0041508	-0.0161071	0.0315551	-0.00828578
21.4	-0.0263037	-0.0526253	-0.0330849	-0.0322489	-0.0648019	-0.164022	-0.0691995	-0.0085461			21.4	-0.0413674	0.0302754	-0.025515	-0.0603047	-0.014352	-0.0431833	-0.0696718	-0.0585931		21.4	-0.0416393	-0.0111965	-0.0587727	-0.0688481	-0.0416094	-0.187686	-0.0323325	-0.0296571		21.4	-0.0402317	-0.0328496	-0.0426677	-0.0476578	-0.0528367	-0.0570862	-0.0300873	-0.056275		21.4	-0.00269299	-0.0194293	-0.0283429	-0.0149466	-0.0030576	-0.0141936	0.0315692	-0.00813195
21.6	-0.0256827	-0.0471395	-0.0445189	-0.0336843	-0.0674213	-0.163664	-0.0689833	-0.00781868			21.6	-0.040719	0.030163	-0.0267125	-0.0601036	-0.0136878	-0.0438356	-0.0712652	-0.0684474		21.6	-0.0407882	-0.0117993	-0.0587171	-0.0695727	-0.0398646	-0.188539	-0.0335099	-0.0297329		21.6	-0.0398174	-0.0376061	-0.0422866	-0.0497617	-0.0556349	-0.0614414	-0.0297096	-0.058197		21.6	-0.00345055	-0.021195	-0.0277208	-0.0150143	-0.00447545	-0.0144959	0.032408	-0.0057347
21.8	-0.0255698	-0.0526946	-0.057365	-0.0366561	-0.0691961	-0.165797	-0.0694898	-0.00669596			21.8	-0.0420215	0.0310082	-0.028524	-0.0557727	-0.0155064	-0.0431318	-0.0714607	-0.0747676		21.8	-0.0433374	-0.0138821	-0.0576641	-0.0686595	-0.0396627	-0.18869	-0.0334808	-0.0317435		21.8	-0.0446727	-0.0386629	-0.0366108	-0.0490037	-0.0562525	-0.0588934	-0.0238238	-0.0558974		21.8	-0.00287098	-0.0188634	-0.0270556	-0.0146049	-0.00273126	-0.014012	0.032215	-0.00534985
22	-0.0244235	-0.0496582	-0.0677226	-0.0338591	-0.0692468	-0.167922	-0.0690442	-0.00661891			22	-0.0415072	0.0295541	-0.0315157	-0.0549566	-0.0165067	-0.0444427	-0.0716796	-0.0760239		22	-0.042814	-0.0153547	-0.0593792	-0.0748689	-0.0410573	-0.192201	-0.0340036	-0.0272286		22	-0.0410901	-0.0398205	-0.0354744	-0.0489087	-0.058957	-0.0591486	-0.0265556	-0.0587303		22	-0.00335536	-0.015077	-0.0258082	-0.014049	-0.00497547	-0.0146273	0.0332317	-0.00535451
22.2	-0.0231744	-0.0483258	-0.0698373	-0.0324096	-0.0657662	-0.167726	-0.0663182	-0.00749127			22.2	-0.0418788	0.0260132	-0.0321051	-0.0582921	-0.0170111	-0.0447317	-0.0731938	-0.068263		22.2	-0.0438153	-0.0146443	-0.059699	-0.0665615	-0.0418819	-0.196193	-0.0331753	-0.0309932		22.2	-0.0418653	-0.0358274	-0.0383973	-0.0477547	-0.0577501	-0.0609735	-0.0282182	-0.0626364		22.2	-0.00553884	-0.0150943	-0.0252358	-0.0139996	-0.00357394	-0.0141093	0.033709	-0.00645772
22.4	-0.0219833	-0.0541105	-0.0653335	-0.0311544	-0.068147	-0.16967	-0.067596	-0.0080588			22.4	-0.0411544	0.0295081	-0.0335012	-0.0615283	-0.017669	-0.0422056	-0.0721711	-0.0568739		22.4	-0.0439242	-0.013008	-0.0598434	-0.0727692	-0.0423141	-0.198273	-0.0342459	-0.032511		22.4	-0.0441526	-0.035805	-0.0422415	-0.0493343	-0.0591016	-0.0630773	-0.0287356	-0.0575503		22.4	-0.00575108	-0.0158295	-0.0268499	-0.0142053	-0.00674945	-0.0155975	0.0345446	-0.00692732
22.6	-0.0218521	-0.0446809	-0.0543955	-0.0315547	-0.0710831	-0.169702	-0.0696183	-0.00943796			22.6	-0.0418296	0.0323433	-0.0350961	-0.064429	-0.0177094	-0.0406278	-0.0719056	-0.043207		22.6	-0.0447972	-0.013357	-0.0613159	-0.0669395	-0.0445254	-0.199881	-0.0333678	-0.0296146		22.6	-0.0432506	-0.0383436	-0.0404821	-0.0478624	-0.0541063	-0.0617675	-0.0329851	-0.0570839		22.6	-0.00562359	-0.0156239	-0.0279833	-0.0142644	-0.00578602	-0.0149892	0.0344774	-0.00488556
22.8	-0.0213808	-0.0530815	-0.0411814	-0.0316075	-0.0724784	-0.170231	-0.0715893	-0.011153			22.8	-0.0406278	0.0302306	-0.0376993	-0.0633185	-0.0167084	-0.0393309	-0.0729536	-0.0331577		22.8	-0.0428394	-0.0104557	-0.0623765	-0.0708987	-0.0450034	-0.201315	-0.0340982	-0.0353215		22.8	-0.041341	-0.0380746	-0.0372985	-0.0562292	-0.0579482	-0.0614796	-0.0278981	-0.0610793		22.8	-0.00642744	-0.0164868	-0.0304473	-0.0141326	-0.00688986	-0.0156452	0.0333904	-0.00625252
23	-0.0216568	-0.0458124	-0.0300625	-0.0340809	-0.0685021	-0.169985	-0.0703728	-0.0140834			23	-0.0431519	0.0285278	-0.0393546	-0.0603545	-0.0156198	-0.0392749	-0.0725908	-0.0333119		23	-0.0426023	-0.00832717	-0.0631923	-0.0714192	-0.0446591	-0.201391	-0.0331664	-0.035123		23	-0.0428466	-0.037713	-0.0378422	-0.0542221	-0.0580897	-0.0638205	-0.0302571	-0.0641253		23	-0.0041226	-0.0184951	-0.030317	-0.0143178	-0.00477847	-0.0163349	0.0320161	-0.00727701
23.2	-0.0227151	-0.0530713	-0.0241174	-0.0355502	-0.0689452	-0.170522	-0.0709906	-0.0145869			23.2	-0.0429329	0.030615	-0.0404847	-0.0583409	-0.0154147	-0.0370318	-0.0713288	-0.0408659		23.2	-0.0461762	-0.010321	-0.0640412	-0.0707259	-0.0465737	-0.200006	-0.0327505	-0.0323116		23.2	-0.046439	-0.0404562	-0.0392144	-0.049446	-0.0561384	-0.0668898	-0.0343073	-0.0595023		23.2	-0.00326414	-0.0185468	-0.0305123	-0.0144823	-0.00682831	-0.0182588	0.0300222	-0.00791741
23.4	-0.023016	-0.0481379	-0.0272912	-0.0363195	-0.0715551	-0.172103	-0.0711018	-0.016655			23.4	-0.0439303	0.0290035	-0.0420149	-0.0616473	-0.0147422	-0.0370504	-0.0700019	-0.0513742		23.4	-0.0503196	-0.0114565	-0.0644535	-0.0764668	-0.0470694	-0.201316	-0.0336699	-0.0362453		23.4	-0.0413249	-0.0392192	-0.0377384	-0.0503955	-0.0576727	-0.0652819	-0.0309473	-0.0585593		23.4	-0.00408061	-0.0192363	-0.0299865	-0.0143617	-0.00430109	-0.0178887	0.0291437	-0.00665195
23.6	-0.0255508	-0.0512645	-0.033738	-0.0365605	-0.0739988	-0.173454	-0.069512	-0.0182185			23.6	-0.0431839	0.0245652	-0.0448608	-0.0650313	-0.0153992	-0.0357134	-0.0679967	-0.064746		23.6	-0.0492584	-0.0120762	-0.0643791	-0.0714636	-0.045879	-0.202401	-0.0322763	-0.0334538		23.6	-0.0450031	-0.0389768	-0.0438569	-0.0503454	-0.0643329	-0.0614825	-0.0316687	-0.0586798		23.6	-0.00412034	-0.0195994	-0.0304899	-0.0153702	-0.00570385	-0.0166098	0.0282838	-0.0091369
23.8	-0.0218604	-0.051732	-0.0452515	-0.0393715	-0.0715342	-0.175962	-0.067693	-0.0204393			23.8	-0.0451203	0.0259323	-0.0437284	-0.0672616	-0.0156922	-0.0356778	-0.0657122	-0.0741747		23.8	-0.0461943	-0.0158227	-0.0654672	-0.0778889	-0.045255	-0.202555	-0.0331254	-0.0316834		23.8	-0.0418469	-0.0374714	-0.038734	-0.0522109	-0.0571632	-0.0610397	-0.0318282	-0.0611765		23.8	-0.00426606	-0.0206596	-0.029243	-0.0167612	-0.00362091	-0.0146911	0.0285192	-0.0102524
24	-0.0203959	-0.0488454	-0.0591248	-0.039917	-0.0692311	-0.178029	-0.0691908	-0.0191363			24	-0.0448513	0.0287858	-0.0439512	-0.0649265	-0.0174386	-0.0306396	-0.0627891	-0.0762479		24	-0.0404182	-0.0177425	-0.0652567	-0.0723133	-0.0464814	-0.201008	-0.0328542	-0.0362571		24	-0.0451306	-0.0396986	-0.043234	-0.0564198	-0.0571912	-0.0581873	-0.0252586	-0.0588668		24	-0.00513842	-0.0183868	-0.0296317	-0.0187769	-0.00567218	-0.0129198	0.029206	-0.0119409
24.2	-0.0179395	-0.0528545	-0.0708366	-0.0413984	-0.0717603	-0.178954	-0.0714865	-0.0192369			24.2	-0.0453193	0.0257523	-0.0457217	-0.0602146	-0.0187818	-0.0308028	-0.0569923	-0.0692246		24.2	-0.0393109	-0.0177049	-0.0655321	-0.0750216	-0.0455656	-0.200324	-0.0335273	-0.0312655		24.2	-0.0462648	-0.0337544	-0.0424409	-0.0527382	-0.0596519	-0.0700985	-0.0356712	-0.0575548		24.2	-0.0049048	-0.0180227	-0.0326649	-0.0177904	-0.0033682	-0.0102743	0.0304251	-0.0119544
24.4	-0.0158095	-0.0467241	-0.0747915	-0.0445879	-0.0741357	-0.178661	-0.0737802	-0.0182152			24.4	-0.0454811	0.0265715	-0.047014	-0.0558496	-0.0194778	-0.0310626	-0.0498802	-0.0576477		24.4	-0.0462671	-0.0167176	-0.0666432	-0.0761342	-0.0454287	-0.200474	-0.0332753	-0.0332971		24.4	-0.0458227	-0.0427432	-0.0439943	-0.053877	-0.0615892	-0.0647344	-0.0323941	-0.0608161		24.4	-0.00395789	-0.0175742	-0.0358483	-0.0189686	-0.00474539	-0.0107108	0.0304105	-0.0130629
24.6	-0.0139539	-0.0517961	-0.0740914	-0.044286	-0.0726334	-0.179802	-0.0756011	-0.0197668			24.6	-0.0466435	0.0313894	-0.0481519	-0.0573857	-0.0173335	-0.0303802	-0.0425771	-0.0452408		24.6	-0.0520931	-0.0182355	-0.0669638	-0.0696379	-0.0461582	-0.200725	-0.0335476	-0.0392769		24.6	-0.0474026	-0.0420866	-0.040801	-0.0550497	-0.0600935	-0.0648923	-0.0290534	-0.0621035		24.6	-0.00443689	-0.0150866	-0.035267	-0.0175328	-0.00353354	-0.0124579	0.0310247	-0.0128831
24.8	-0.019214	-0.0507045	-0.0660016	-0.0413345	-0.0693224	-0.178853	-0.0766687	-0.0192646			24.8	-0.0456369	0.0266817	-0.0512816	-0.0622133	-0.0168651	-0.0309105	-0.0349819	-0.0399623		24.8	-0.0529171	-0.0182064	-0.0670114	-0.0793248	-0.0476053	-0.200052	-0.0337042	-0.0382481		24.8	-0.0446147	-0.0407259	-0.0407227	-0.0550115	-0.0592677	-0.0650329	-0.0327948	-0.0596297		24.8	-0.00355382	-0.0142088	-0.0345884	-0.0162658	-0.00541675	-0.0131939	0.0302402	-0.0125282
25	-0.0206813	-0.0517354	-0.0537304	-0.0427392	-0.0710402	-0.177323	-0.0749972	-0.0208474			25	-0.0453967	0.0278087	-0.0518613	-0.0693496	-0.0167491	-0.0327516	-0.0294385	-0.0382706		25	-0.0481019	-0.0196534	-0.067284	-0.0701906	-0.0471214	-0.20206	-0.0349244	-0.0397566		25	-0.044275	-0.0429016	-0.0444033	-0.0538963	-0.0624289	-0.0697638	-0.0319625	-0.060509		25	-0.00461845	-0.0141196	-0.0352593	-0.01532	-0.00538295	-0.0165256	0.0319194	-0.0131959
25.2	-0.0233828	-0.0532922	-0.042023	-0.0403059	-0.0747716	-0.178894	-0.0744953	-0.0222368			25.2	-0.045207	0.0314523	-0.0536748	-0.0723401	-0.0144937	-0.027606	-0.025687	-0.0475463		25.2	-0.040461	-0.0196576	-0.06744	-0.0825476	-0.0466111	-0.202701	-0.033914	-0.0419168		25.2	-0.0437047	-0.0401236	-0.0399416	-0.055114	-0.0605735	-0.0665296	-0.0305045	-0.0633283		25.2	-0.00517529	-0.0142179	-0.0350352	-0.0157665	-0.00765741	-0.0177956	0.0318916	-0.0121156
25.4	-0.0244925	-0.0503615	-0.0307239	-0.0366721	-0.0757219	-0.180165	-0.0733437	-0.0253678			25.4	-0.0448248	0.0303519	-0.0546966	-0.0710672	-0.0143565	-0.0230363	-0.0239251	-0.0627901		25.4	-0.0433805	-0.0198419	-0.0671976	-0.0691711	-0.0483578	-0.203653	-0.0337367	-0.037637		25.4	-0.0432241	-0.0411236	-0.0405805	-0.0519056	-0.0615684	-0.0651447	-0.0320608	-0.0612971		25.4	-0.00607287	-0.014343	-0.0348393	-0.0162146	-0.00877173	-0.0178927	0.0314049	-0.0135752
25.6	-0.0235171	-0.0570512	-0.0223178	-0.0384518	-0.071561	-0.17845	-0.0722782	-0.0269477			25.6	-0.0457755	0.0288835	-0.0553407	-0.0655242	-0.0160308	-0.0256399	-0.0218165	-0.0748964		25.6	-0.0540342	-0.0193917	-0.0674585	-0.0790382	-0.0491807	-0.202083	-0.0340247	-0.0399026		25.6	-0.0417544	-0.039889	-0.0448585	-0.0535792	-0.0630428	-0.0681919	-0.0349851	-0.0647959		25.6	-0.00518463	-0.0151743	-0.036312	-0.0161806	-0.00810833	-0.017568	0.0312227	-0.0143124
25.8	-0.0216565	-0.0475612	-0.0241224	-0.0381364	-0.0717645	-0.181275	-0.0725086	-0.0270473			25.8	-0.0458081	0.0285304	-0.0559921	-0.0590728	-0.0179669	-0.0232406	-0.0205109	-0.0748323		25.8	-0.0609322	-0.0195372	-0.0673351	-0.0746949	-0.049926	-0.203781	-0.034623	-0.0347846		25.8	-0.0482524	-0.0417778	-0.0445206	-0.0582771	-0.06572	-0.0696471	-0.0333694	-0.0659219		25.8	-0.00627338	-0.0154508	-0.038506	-0.0159179	-0.00781656	-0.015273	0.0331211	-0.0155189
26	-0.0209082	-0.0552875	-0.0304261	-0.0382144	-0.076429	-0.184111	-0.0739333	-0.0252633			26	-0.0459749	0.0261214	-0.0581937	-0.0570324	-0.01822	-0.0216409	-0.0208548	-0.0689704		26	-0.0603064	-0.0189708	-0.0668376	-0.0746632	-0.0512471	-0.202647	-0.0359888	-0.032933		26	-0.0457616	-0.0435663	-0.043824	-0.0558174	-0.0627252	-0.0683894	-0.0332117	-0.0626201		26	-0.00652815	-0.0177187	-0.0392166	-0.014884	-0.00715928	-0.0152218	0.0311197	-0.0149771
26.2	-0.0206521	-0.0507087	-0.0389588	-0.0422063	-0.077833	-0.186358	-0.074571	-0.0259312			26.2	-0.0474439	0.0261227	-0.0579517	-0.0612736	-0.0191946	-0.0261602	-0.0214655	-0.0576355		26.2	-0.0540988	-0.0179306	-0.0672605	-0.0769608	-0.0525253	-0.202908	-0.0359915	-0.0362583		26.2	-0.0479267	-0.0363021	-0.0402561	-0.0528741	-0.0605401	-0.0672513	-0.0310072	-0.0609395		26.2	-0.00739053	-0.0189829	-0.0384189	-0.0160478	-0.00624323	-0.0143762	0.0310882	-0.0151577
26.4	-0.0210367	-0.0519861	-0.0511185	-0.0487789	-0.0728823	-0.186024	-0.0739724	-0.0260026			26.4	-0.047529	0.0235828	-0.0595626	-0.0698137	-0.0187842	-0.028308	-0.0241729	-0.0476976		26.4	-0.0434355	-0.0202085	-0.0675478	-0.0739239	-0.0517369	-0.202772	-0.0368564	-0.0340612		26.4	-0.0489391	-0.0432492	-0.0434611	-0.0583668	-0.0644948	-0.063556	-0.0328391	-0.0659429		26.4	-0.0069889	-0.0187663	-0.0383162	-0.0156357	-0.00365012	-0.0152583	0.0331062	-0.0139084
26.6	-0.0207174	-0.0526656	-0.0648669	-0.0491178	-0.0716457	-0.190428	-0.0765382	-0.027063			26.6	-0.0475284	0.0241714	-0.0605996	-0.0755599	-0.0174456	-0.0241588	-0.0306598	-0.0450924		26.6	-0.0408243	-0.0210183	-0.0687042	-0.0823077	-0.0518636	-0.204998	-0.0369147	-0.0341444		26.6	-0.0477677	-0.0369491	-0.0449551	-0.0528094	-0.0630669	-0.0650546	-0.0335947	-0.0673962		26.6	-0.00786695	-0.0213122	-0.038958	-0.0156551	-0.00613511	-0.0155889	0.0319552	-0.0139564
26.8	-0.0243782	-0.0491625	-0.0748949	-0.0506302	-0.0777253	-0.189615	-0.0759598	-0.0287857			26.8	-0.0479748	0.0278351	-0.0605373	-0.081564	-0.0175779	-0.0237811	-0.0375358	-0.0513896		26.8	-0.0502422	-0.0204605	-0.0683738	-0.0676125	-0.0506432	-0.204919	-0.0344289	-0.0372763		26.8	-0.0471179	-0.040614	-0.0446946	-0.055711	-0.0656953	-0.0706519	-0.0396394	-0.0694522		26.8	-0.00822718	-0.0236765	-0.0388926	-0.0184626	-0.006125	-0.0188775	0.0299541	-0.0113118
27	-0.0254359	-0.0540305	-0.0806288	-0.0483512	-0.0782603	-0.188692	-0.0758292	-0.0330299			27	-0.0480969	0.0271633	-0.0609082	-0.0789374	-0.0181083	-0.0208464	-0.0440439	-0.0637144		27	-0.0616384	-0.0203648	-0.0691263	-0.0812257	-0.0492559	-0.204261	-0.0363008	-0.0337828		27	-0.046707	-0.0461034	-0.0455014	-0.054784	-0.0644197	-0.0718633	-0.0389684	-0.066214		27	-0.00771641	-0.0229411	-0.0376858	-0.0196956	-0.00651227	-0.0174912	0.0290463	-0.00986242
27.2	-0.0252106	-0.0476021	-0.0811602	-0.0435022	-0.070776	-0.187541	-0.0746888	-0.035146			27.2	-0.0475985	0.0248288	-0.0625718	-0.072678	-0.0179015	-0.0202346	-0.0524756	-0.0720271		27.2	-0.0638353	-0.0219607	-0.0691119	-0.0687417	-0.0491491	-0.204863	-0.0345097	-0.0360279		27.2	-0.046258	-0.0409697	-0.0462859	-0.0557989	-0.0651641	-0.0656781	-0.0361558	-0.066692		27.2	-0.00797673	-0.021691	-0.0373184	-0.0179143	-0.00508746	-0.017193	0.0296344	-0.0109701
27.4	-0.0255053	-0.0558204	-0.077169	-0.0387333	-0.0712732	-0.189353	-0.0751418	-0.0354084			27.4	-0.0489016	0.0232851	-0.0641769	-0.0638012	-0.0194405	-0.017913	-0.0612596	-0.0710284		27.4	-0.0603475	-0.023135	-0.069454	-0.0803674	-0.0493691	-0.205821	-0.0349141	-0.0351035		27.4	-0.0468651	-0.0466263	-0.0459699	-0.0609777	-0.0641992	-0.0700995	-0.0339635	-0.0654816		27.4	-0.00844299	-0.0212313	-0.0368554	-0.0173506	-0.00727656	-0.0161681	0.0285343	-0.0107993
27.6	-0.0265859	-0.0503394	-0.070813	-0.0384586	-0.0786921	-0.188132	-0.0726257	-0.0369518			27.6	-0.0484111	0.0215463	-0.0655143	-0.060919	-0.021509	-0.0202636	-0.0665907	-0.0613762		27.6	-0.0481973	-0.0215865	-0.0673193	-0.0755555	-0.0502812	-0.205209	-0.0356388	-0.0340218		27.6	-0.0468514	-0.0417944	-0.0449199	-0.0564129	-0.0647123	-0.0739146	-0.0343487	-0.0672527		27.6	-0.00945882	-0.0184516	-0.0367005	-0.0176942	-0.004719	-0.0148395	0.0284789	-0.0103714
27.8	-0.0213572	-0.0569103	-0.0592111	-0.0366154	-0.0776884	-0.188665	-0.0744547	-0.0410485			27.8	-0.0497555	0.0211812	-0.0669466	-0.0627195	-0.019321	-0.0218138	-0.072123	-0.0520412		27.8	-0.0374106	-0.0218527	-0.0678013	-0.0811939	-0.0510078	-0.206405	-0.035113	-0.0360359		27.8	-0.0460157	-0.0415824	-0.0479235	-0.0568454	-0.0621584	-0.0698453	-0.0386777	-0.0713046		27.8	-0.00898002	-0.0136645	-0.0355765	-0.0155233	-0.00563425	-0.0137307	0.030073	-0.0117151
28	-0.022308	-0.0553224	-0.048648	-0.0410192	-0.0716112	-0.189172	-0.073664	-0.0433737			28	-0.050516	0.0217981	-0.0686153	-0.0686717	-0.0187576	-0.0235871	-0.0760377	-0.0464131		28	-0.0385035	-0.0209598	-0.0664451	-0.0790896	-0.0523472	-0.208074	-0.0336846	-0.0350957		28	-0.0515303	-0.0415263	-0.046207	-0.0562869	-0.070542	-0.0704644	-0.0336145	-0.0643462		28	-0.00958163	-0.0138593	-0.036859	-0.0159462	-0.00532797	-0.0120342	0.0313448	-0.0128819
28.2	-0.0214625	-0.0529743	-0.0411994	-0.0426601	-0.0751067	-0.188826	-0.0741794	-0.0459389			28.2	-0.0506454	0.0227619	-0.0703823	-0.0759872	-0.0219312	-0.0230896	-0.0772714	-0.050605		28.2	-0.053358	-0.0231459	-0.0661853	-0.0778928	-0.0517444	-0.208554	-0.0352736	-0.0350606		28.2	-0.0520192	-0.0453745	-0.0439869	-0.0560469	-0.0682502	-0.0712515	-0.0344005	-0.0647987		28.2	-0.00884779	-0.014802	-0.0383479	-0.016648	-0.00671558	-0.0146552	0.03042	-0.012262
28.4	-0.0208595	-0.0577219	-0.0343038	-0.043559	-0.0805364	-0.189661	-0.0758012	-0.0518613			28.4	-0.0500036	0.0255117	-0.0706721	-0.081746	-0.0197595	-0.0270129	-0.0756692	-0.0604099		28.4	-0.0647086	-0.0221699	-0.066546	-0.0842555	-0.0532131	-0.20931	-0.0343722	-0.0364642		28.4	-0.0495715	-0.0462246	-0.0451486	-0.0632752	-0.0632015	-0.0719634	-0.0339499	-0.0680945		28.4	-0.0103964	-0.0178152	-0.039931	-0.0172618	-0.00512725	-0.0146939	0.0314672	-0.0135933
28.6	-0.0207178	-0.0522093	-0.0310449	-0.0425649	-0.0766182	-0.190541	-0.0780521	-0.0538545			28.6	-0.0506708	0.0225454	-0.0725876	-0.0821287	-0.021117	-0.025307	-0.0707926	-0.0707338		28.6	-0.0678368	-0.0253659	-0.0687707	-0.0723886	-0.0514641	-0.208625	-0.0349378	-0.0353863		28.6	-0.0499136	-0.0429439	-0.0498423	-0.0550843	-0.071662	-0.0711744	-0.0355182	-0.068705		28.6	-0.00822616	-0.0164865	-0.0407242	-0.0173603	-0.00680672	-0.0153959	0.0320661	-0.0135031
28.8	-0.0232325	-0.0559946	-0.0303435	-0.0424077	-0.0705982	-0.190583	-0.0795185	-0.0529031			28.8	-0.0500547	0.0206729	-0.0757176	-0.0760795	-0.0232073	-0.0249082	-0.0623053	-0.0715328		28.8	-0.0634822	-0.0236688	-0.0692478	-0.0874634	-0.0530766	-0.206364	-0.0364564	-0.0357994		28.8	-0.0491546	-0.0413084	-0.0489286	-0.0576237	-0.0687143	-0.0702883	-0.0373296	-0.0696715		28.8	-0.00913504	-0.019695	-0.0422849	-0.0181597	-0.00613506	-0.0168407	0.0310726	-0.0170146
29	-0.023112	-0.0524585	-0.0332864	-0.0350259	-0.0754225	-0.192011	-0.083211	-0.0543956			29	-0.0499146	0.0205915	-0.0754295	-0.0692595	-0.0240988	-0.0263584	-0.0523373	-0.0632711		29	-0.0508662	-0.0260928	-0.0695312	-0.0750734	-0.0526687	-0.206554	-0.0350438	-0.0357333		29	-0.053045	-0.0437206	-0.0467195	-0.062605	-0.065201	-0.0700123	-0.0357318	-0.0675061		29	-0.00852714	-0.0195421	-0.0411141	-0.0190121	-0.00668767	-0.0180134	0.0303775	-0.0152788
29.2	-0.0247257	-0.0561378	-0.0386469	-0.0361522	-0.0789803	-0.192509	-0.0860176	-0.0555497			29.2	-0.0496274	0.0202602	-0.076579	-0.0628918	-0.0241332	-0.0229034	-0.0419277	-0.0534315		29.2	-0.0373251	-0.0246158	-0.0691364	-0.0904029	-0.0531987	-0.20599	-0.0360452	-0.0356829		29.2	-0.0497538	-0.0442873	-0.0444119	-0.061648	-0.0663909	-0.0713933	-0.0402156	-0.0739158		29.2	-0.00908491	-0.0183443	-0.0403276	-0.0195385	-0.00695775	-0.0165175	0.0290705	-0.0158685
29.4	-0.0243494	-0.0575589	-0.0480129	-0.0381519	-0.0721596	-0.192771	-0.0869927	-0.0538441			29.4	-0.0515238	0.0187273	-0.0767565	-0.0587301	-0.0246255	-0.0187743	-0.033233	-0.0478774		29.4	-0.0365128	-0.0251791	-0.0694259	-0.0742771	-0.0519616	-0.204394	-0.0339791	-0.0369439		29.4	-0.0520109	-0.0427739	-0.0482493	-0.060279	-0.0674104	-0.0724926	-0.0389241	-0.0714712		29.4	-0.00699631	-0.0157925	-0.0389848	-0.0194424	-0.00664106	-0.0164718	0.0268371	-0.0153104
29.6	-0.0267557	-0.0557311	-0.0562973	-0.0388369	-0.0714699	-0.193952	-0.0876071	-0.054326			29.6	-0.0517814	0.0209123	-0.0750207	-0.0601738	-0.0218167	-0.0171425	-0.0271816	-0.0475456		29.6	-0.046789	-0.0256843	-0.0688665	-0.0898259	-0.0532118	-0.205012	-0.0336335	-0.0339675		29.6	-0.0525084	-0.0435014	-0.0479003	-0.0586261	-0.0682196	-0.0753626	-0.0422829	-0.071313		29.6	-0.00916167	-0.0157655	-0.0370281	-0.0197169	-0.00742549	-0.0146015	0.026242	-0.017285
29.8	-0.0278056	-0.0602489	-0.0650468	-0.0382	-0.0784135	-0.195257	-0.0866004	-0.0555405			29.8	-0.0509173	0.0236449	-0.0745009	-0.0643519	-0.0193938	-0.0142133	-0.0241019	-0.0533044		29.8	-0.057734	-0.0271786	-0.0676668	-0.0745031	-0.0521834	-0.205586	-0.0341506	-0.0350464		29.8	-0.0484267	-0.0417164	-0.046926	-0.0613721	-0.0684937	-0.0753944	-0.0398852	-0.0688517		29.8	-0.00809607	-0.0134696	-0.0371999	-0.0205524	-0.00775745	-0.0137322	0.0261606	-0.0145845
30	0.0570872	0.00821334	-0.0581485	0.164954	-0.00721953	-0.122126	0.015703	0.0698775			30	0.000954565	-0.104277	0.141968	-0.00862176	0.0879483	0.0485635	-0.0023254	0.104305		30	-0.129832	0.115443	-0.0343493	-0.0499117	0.127692	0.0552361	0.150726	0.120567		30	-0.0776732	-0.0577187	-0.0777358	-0.121726	-0.123952	-0.152188	-0.0630097	-0.153354		30	0.117602	0.212389	0.00581862	0.465383	0.214749	-0.142561	-0.160716	-0.161556
30.2	0.0307049	0.0386158	-0.0456117	0.09416	-0.0144479	-0.113729	0.0292882	0.0633706			30.2	0.00642833	-0.104192	0.127472	0.00707964	0.117176	0.0556311	0.00998966	0.108876		30.2	-0.129095	0.0632249	-0.0249034	-0.0580417	0.136516	0.00967381	0.11196	0.121246		30.2	-0.0700505	-0.0470605	-0.0594714	-0.108459	-0.111453	-0.140253	-0.0523065	-0.142029		30.2	0.141123	0.221495	0.0224928	0.470617	0.239817	-0.150115	-0.188079	-0.179431
30.4	0.0455997	0.0300563	-0.043054	0.0938133	-0.00625996	-0.103675	0.0433488	0.072597			30.4	0.0186029	-0.0925892	0.132314	0.0103287	0.141993	0.0570286	0.0289884	0.142121		30.4	-0.144861	0.0350931	-0.0206392	-0.0732476	0.13748	0.00529606	0.153073	0.112944		30.4	-0.0632484	-0.0343255	-0.0510107	-0.10192	-0.100943	-0.131776	-0.0469143	-0.131009		30.4	0.1503	0.226109	0.0459509	0.464794	0.253113	-0.137939	-0.18642	-0.162028
30.6	0.0412994	0.045404	-0.0329088	0.0881659	-0.00595089	-0.100046	0.0496768	0.0777417			30.6	0.0267916	-0.0923119	0.126333	0.0158248	0.150448	0.0692526	0.039811	0.0930054		30.6	-0.0955581	0.023336	-0.0149464	-0.0933983	0.141754	-0.00438195	0.158274	0.12497		30.6	-0.0545265	-0.0336659	-0.0398297	-0.0911876	-0.0938003	-0.119036	-0.0322908	-0.121842		30.6	0.165997	0.240948	0.0398548	0.467831	0.264645	-0.1328	-0.169677	-0.17239
30.8	0.0502126	0.0384153	-0.0375093	0.0872445	-0.000974719	-0.0973575	0.0576336	0.0746214			30.8	0.0330896	-0.0873123	0.123618	0.0216247	0.157913	0.0506513	0.0338484	0.109944		30.8	-0.120492	0.0219402	-0.0117287	-0.0621593	0.152	-0.00498898	0.138294	0.122058		30.8	-0.0498548	-0.0187214	-0.033039	-0.0852264	-0.0842988	-0.110452	-0.0236145	-0.112678		30.8	0.17019	0.24665	0.0562495	0.474091	0.263842	-0.125139	-0.172327	-0.154543
31	0.0499102	0.0448418	-0.0241206	0.075875	0.00333605	-0.0922812	0.0700322	0.0789462			31	0.0411188	-0.0842846	0.122797	0.0258502	0.172267	0.0608444	0.0397208	0.12769		31	-0.107181	0.00429757	-0.00421514	-0.0621987	0.158238	-0.0146807	0.148089	0.124603		31	-0.0388314	-0.00903569	-0.0193496	-0.0780151	-0.0803412	-0.103215	-0.0159543	-0.105514		31	0.184106	0.253632	0.0652198	0.475049	0.274268	-0.120585	-0.170087	-0.157574
31.2	0.0562116	0.0480537	-0.0249497	0.0846859	0.0119559	-0.0898238	0.0736626	0.0845871			31.2	0.0475891	-0.0813556	0.123188	0.0300599	0.182573	0.068154	0.0400761	0.140385		31.2	-0.10726	0.00525054	-0.000291702	-0.0619185	0.164138	-0.0117367	0.156992	0.12798		31.2	-0.0370125	-0.00094337	-0.0146684	-0.0676896	-0.074393	-0.0905826	-0.00852914	-0.098852		31.2	0.18871	0.260305	0.0719445	0.477776	0.280877	-0.112867	-0.161767	-0.15361
31.4	0.0548268	0.0485642	-0.0135781	0.0887042	0.020745	-0.0894718	0.0767363	0.0879643			31.4	0.0524183	-0.0811654	0.121856	0.0329323	0.187934	0.0724729	0.0387566	0.12833		31.4	-0.0919649	0.0119673	0.00436284	-0.0619753	0.170623	-0.0112467	0.155132	0.130717		31.4	-0.0295527	0.00207287	-0.0101301	-0.0619913	-0.0599794	-0.0840193	-0.00482864	-0.0935553		31.4	0.195991	0.267955	0.0774038	0.483976	0.285316	-0.107401	-0.156385	-0.15495
31.6	0.0538793	0.049054	-0.0161302	0.0922056	0.028127	-0.0868992	0.0812216	0.0891698			31.6	0.0568944	-0.0791592	0.123491	0.033538	0.192568	0.0685904	0.0393475	0.126455		31.6	-0.101978	0.0162989	0.00748521	-0.0509816	0.174622	-0.0082873	0.158525	0.132642		31.6	-0.0234459	0.0131456	-0.00348537	-0.0529536	-0.0630884	-0.076086	0.0100685	-0.0836676		31.6	0.202447	0.273913	0.0861725	0.487794	0.288563	-0.10113	-0.153844	-0.151795
31.8	0.0491819	0.0541683	-0.0108876	0.0945522	0.0330757	-0.0850461	0.0842525	0.0901377			31.8	0.0613419	-0.0768211	0.124137	0.0365002	0.198438	0.0743221	0.0410928	0.12238		31.8	-0.0915075	0.014663	0.0113522	-0.0504503	0.178558	-0.00764144	0.162089	0.133244		31.8	-0.0178847	0.0201424	0.00743197	-0.043798	-0.04673	-0.0729841	0.0163433	-0.0745814		31.8	0.207391	0.278333	0.0913271	0.492796	0.294127	-0.0962754	-0.147774	-0.155318
32	0.0440044	0.0536966	-0.00706487	0.095977	0.0350759	-0.0837652	0.0865806	0.0915667			32	0.063865	-0.0803917	0.123687	0.0392809	0.203802	0.0696558	0.0455215	0.111926		32	-0.0958742	0.0170155	0.0121438	-0.0595169	0.181646	-0.00706318	0.162718	0.136515		32	-0.0116584	0.0258116	0.0152149	-0.0400905	-0.045781	-0.0604712	0.0179814	-0.0685117		32	0.210856	0.284934	0.0985606	0.499011	0.299325	-0.0909123	-0.145172	-0.152606
32.2	0.0416711	0.0571597	-0.00621829	0.094158	0.0333767	-0.0808902	0.0913488	0.0955347			32.2	0.0672374	-0.0796356	0.126125	0.0385666	0.205701	0.0615837	0.0505142	0.11114		32.2	-0.0909574	0.0160266	0.0144447	-0.055592	0.185071	-0.00705969	0.160636	0.136047		32.2	-0.00893504	0.0325708	0.0256039	-0.0314689	-0.0367919	-0.0533381	0.0285617	-0.0610944		32.2	0.216388	0.291099	0.105806	0.50503	0.302104	-0.0852838	-0.142535	-0.149853
32.4	0.0410618	0.0571214	-0.0124938	0.0900657	0.030441	-0.0797367	0.094429	0.0954981			32.4	0.0696346	-0.0772877	0.127408	0.0425469	0.208541	0.0548938	0.0535649	0.133957		32.4	-0.0879773	0.0162127	0.0164221	-0.0475298	0.188771	-0.00379207	0.165879	0.141272		32.4	-0.00288377	0.0394347	0.0317423	-0.0230124	-0.0226008	-0.0447428	0.034702	-0.0559722		32.4	0.221903	0.297975	0.111146	0.508874	0.306197	-0.0806514	-0.138725	-0.146038
32.6	0.0415963	0.061001	0.000572515	0.088018	0.0313422	-0.0792674	0.0933804	0.0943289			32.6	0.0724316	-0.077457	0.128175	0.0453562	0.211081	0.0588136	0.0551185	0.160692		32.6	-0.0889451	0.0177692	0.0181162	-0.0547334	0.193247	-0.00213582	0.161086	0.141323		32.6	0.00518749	0.0437151	0.0383452	-0.0170467	-0.0203651	-0.0334548	0.0461524	-0.0489961		32.6	0.224199	0.302627	0.118107	0.516704	0.311035	-0.0773125	-0.13388	-0.144123
32.8	0.0444516	0.0569703	-0.00237313	0.0884027	0.0350289	-0.0777902	0.0966412	0.0949982			32.8	0.0741727	-0.0829307	0.130246	0.044654	0.213777	0.0597676	0.0575385	0.175968		32.8	-0.0867582	0.0226284	0.0203105	-0.0533331	0.196497	0.00100983	0.167604	0.146542		32.8	0.0102632	0.0566184	0.0433953	-0.00614586	-0.0110546	-0.029503	0.0526742	-0.0463482		32.8	0.229524	0.308579	0.1263	0.522738	0.315638	-0.0720891	-0.131197	-0.141553
33	0.0476279	0.0630013	-0.0108831	0.0863285	0.0362612	-0.0769234	0.0967705	0.0996463			33	0.076518	-0.0786373	0.131358	0.0481763	0.215705	0.0695833	0.0576305	0.177163		33	-0.0836846	0.0251325	0.0231603	-0.0488583	0.198641	0.00533635	0.162061	0.1466		33	0.00976158	0.0596339	0.0536723	0.00308024	-0.00326567	-0.0125618	0.0602706	-0.0350947		33	0.235036	0.315039	0.133272	0.530597	0.321923	-0.0662632	-0.127047	-0.142433
33.2	0.0492974	0.0574658	0.00197072	0.0894962	0.0380191	-0.0766481	0.101084	0.0964949			33.2	0.0801404	-0.0794442	0.133601	0.0507529	0.219169	0.0785738	0.0566175	0.164971		33.2	-0.0878361	0.0278452	0.0242675	-0.0525865	0.199489	0.00909201	0.170959	0.152036		33.2	0.0150772	0.0678849	0.0601675	0.0103345	0.00842393	-0.0036094	0.0635006	-0.0246562		33.2	0.240171	0.322839	0.143211	0.538736	0.328365	-0.0609457	-0.123715	-0.143396
33.4	0.0513111	0.0643843	0.00486105	0.0954785	0.0367508	-0.0745488	0.10635	0.0935968			33.4	0.0804309	-0.0813172	0.136138	0.0497632	0.220724	0.0773439	0.0558008	0.145657		33.4	-0.087728	0.0290564	0.0248652	-0.0469841	0.201859	0.0110334	0.161159	0.152283		33.4	0.0182831	0.0742844	0.072318	0.0198444	0.0120953	0.00200638	0.0812845	-0.0244566		33.4	0.243221	0.325833	0.150416	0.5467	0.334938	-0.0535842	-0.118684	-0.144879
33.6	0.0526734	0.0623075	-0.00678634	0.0997345	0.0386304	-0.0725067	0.110407	0.0953608			33.6	0.0803069	-0.0834507	0.13739	0.0501327	0.223569	0.0858363	0.0562509	0.124229		33.6	-0.0774385	0.0266831	0.0256694	-0.0472358	0.204643	0.0134199	0.169019	0.154906		33.6	0.0250582	0.0815653	0.0801146	0.0303621	0.0226303	0.0116391	0.0897862	-0.0195573		33.6	0.249827	0.332473	0.157997	0.555483	0.341547	-0.0467469	-0.117191	-0.145031
33.8	0.0545185	0.0651551	-0.00186583	0.103493	0.039143	-0.0739596	0.110566	0.101888			33.8	0.081463	-0.0814919	0.138249	0.0537239	0.225818	0.0844395	0.0602277	0.107206		33.8	-0.08688	0.0239535	0.0254645	-0.0461499	0.205441	0.016092	0.16574	0.156031		33.8	0.0317033	0.0911413	0.0910323	0.0369941	0.0302049	0.0227246	0.0927508	-0.0138192		33.8	0.252302	0.341864	0.163018	0.563403	0.34713	-0.0402448	-0.113057	-0.143202
34	0.0557612	0.0662237	0.00811509	0.107342	0.0405012	-0.0715246	0.10967	0.0987042			34	0.0816757	-0.0822451	0.139431	0.0536451	0.229056	0.0797108	0.0655744	0.102512		34	-0.080185	0.0256645	0.0266063	-0.0425251	0.207301	0.0177615	0.17168	0.15584		34	0.0318028	0.102889	0.0996334	0.0478326	0.0435294	0.0292255	0.102155	-0.00819269		34	0.255344	0.346186	0.172185	0.569304	0.352524	-0.0345197	-0.109647	-0.139929
34.2	0.0580571	0.0688955	0.00118804	0.10642	0.039692	-0.0707553	0.108163	0.0949825			34.2	0.0818561	-0.0829972	0.139196	0.0530625	0.23045	0.0754894	0.0738052	0.105951		34.2	-0.0677187	0.024902	0.0269099	-0.041233	0.211044	0.0196902	0.167181	0.156841		34.2	0.0392585	0.108525	0.108686	0.0646205	0.0474639	0.0393727	0.111373	-0.00225525		34.2	0.261911	0.351739	0.176711	0.57751	0.35978	-0.0279623	-0.1029	-0.137204
34.4	0.0599468	0.0675719	-0.00364726	0.105387	0.0440467	-0.0700383	0.106161	0.0969374			34.4	0.0843354	-0.0840296	0.140026	0.0537375	0.23417	0.0837967	0.0807137	0.11397		34.4	-0.0831182	0.0244873	0.0296986	-0.0401263	0.212287	0.0205468	0.176108	0.156436		34.4	0.0472877	0.112583	0.117737	0.0712707	0.0604748	0.0492615	0.121668	0.00248997		34.4	0.267027	0.359466	0.184817	0.586058	0.366502	-0.0235852	-0.0999078	-0.135788
34.6	0.0627063	0.0671177	0.00256117	0.106684	0.045657	-0.0706299	0.106216	0.0982646			34.6	0.0849721	-0.0830089	0.140701	0.0544024	0.237007	0.0754898	0.0855866	0.124103		34.6	-0.0809998	0.0323577	0.0308499	-0.0384974	0.2132	0.0229457	0.175512	0.159071		34.6	0.0480556	0.125293	0.127254	0.0803861	0.0652303	0.0681851	0.128884	0.0113967		34.6	0.270694	0.367206	0.194046	0.592843	0.37259	-0.0187224	-0.0951339	-0.136939
34.8	0.0642549	0.0695608	0.00730951	0.106735	0.0438934	-0.0681702	0.107213	0.0941156			34.8	0.0861886	-0.082188	0.141974	0.0554936	0.238457	0.0742867	0.0875527	0.138335		34.8	-0.0663192	0.0345814	0.0323159	-0.0349421	0.215864	0.0254626	0.175472	0.159179		34.8	0.0503523	0.132291	0.134484	0.0931571	0.0779812	0.0701618	0.134328	0.0212353		34.8	0.277033	0.373258	0.202772	0.602517	0.379799	-0.0125811	-0.0935025	-0.137744
35	0.0653262	0.0683034	0.00811865	0.106922	0.0412472	-0.0667478	0.110326	0.0912721			35	0.087122	-0.081144	0.143936	0.0558007	0.239223	0.0764511	0.08646	0.149412		35	-0.0773836	0.0263822	0.0330161	-0.0404777	0.217351	0.0245382	0.178294	0.161068		35	0.060481	0.140027	0.144174	0.100082	0.0873434	0.0812994	0.146156	0.0306027		35	0.280637	0.381976	0.206674	0.610526	0.387123	-0.00725796	-0.0882892	-0.139064
35.2	0.0662574	0.0657058	0.0065598	0.110161	0.045324	-0.0666489	0.110502	0.093099			35.2	0.0880751	-0.0806953	0.144326	0.0571833	0.240601	0.0760765	0.0827087	0.15953		35.2	-0.085462	0.0267605	0.0339026	-0.0340069	0.219518	0.0268582	0.17897	0.163329		35.2	0.0629881	0.148627	0.153015	0.114831	0.0973083	0.0969472	0.154688	0.0286813		35.2	0.283257	0.390195	0.214513	0.61827	0.393211	-0.00275166	-0.0864403	-0.139726
35.4	0.0653004	0.068246	0.00667168	0.112637	0.0501341	-0.0657324	0.113139	0.0924885			35.4	0.0883784	-0.0805177	0.145471	0.0567977	0.242358	0.075471	0.0791886	0.16946		35.4	-0.0700095	0.0315533	0.0338272	-0.0379765	0.222668	0.0286305	0.180914	0.165221		35.4	0.0687498	0.156904	0.17109	0.124111	0.108964	0.103399	0.157381	0.0368057		35.4	0.289899	0.398826	0.220547	0.628505	0.398241	0.00386075	-0.0828233	-0.140145
35.6	0.066191	0.0662862	0.00819446	0.114247	0.0481325	-0.0651181	0.115974	0.0908276			35.6	0.0898761	-0.0804431	0.148377	0.0586989	0.244291	0.075325	0.077431	0.177406		35.6	-0.0660606	0.0222792	0.0361326	-0.0320465	0.22279	0.0302495	0.176923	0.165274		35.6	0.0764482	0.167557	0.175661	0.131481	0.12121	0.116803	0.175738	0.0425111		35.6	0.295439	0.40883	0.228057	0.637665	0.406134	0.0103778	-0.079449	-0.136735
35.8	0.0665807	0.0699416	0.0100943	0.114166	0.0450944	-0.0638486	0.11649	0.0886593			35.8	0.0900213	-0.0782256	0.150141	0.0594908	0.246112	0.0771297	0.079175	0.180652		35.8	-0.0806259	0.0225636	0.0372695	-0.0338058	0.223923	0.0331312	0.180531	0.166917		35.8	0.0833265	0.175818	0.188373	0.144539	0.129091	0.123632	0.18352	0.0515857		35.8	0.302102	0.418516	0.237389	0.648409	0.414319	0.0164298	-0.0746038	-0.134763
36	0.0699198	0.0642933	0.00834093	0.114375	0.0509963	-0.0656718	0.115911	0.0872878			36	0.0912115	-0.0784818	0.151273	0.0614041	0.247955	0.0708618	0.0846516	0.184443		36	-0.0766549	0.0371005	0.0385314	-0.0327894	0.226502	0.0362133	0.178953	0.168265		36	0.0882688	0.185402	0.198819	0.155535	0.1422	0.135261	0.186929	0.0578523		36	0.310524	0.427323	0.249301	0.659383	0.422067	0.0239896	-0.0735831	-0.133935
36.2	0.068856	0.0733311	0.00874695	0.111437	0.055959	-0.0647936	0.118231	0.0857766			36.2	0.0904921	-0.0782242	0.153697	0.062698	0.2521	0.0683802	0.0907404	0.188303		36.2	-0.0640308	0.0408305	0.0403945	-0.0280318	0.229588	0.0371771	0.17855	0.16737		36.2	0.0930538	0.190016	0.207973	0.169628	0.150646	0.146179	0.194539	0.0627678		36.2	0.317489	0.43344	0.256267	0.668521	0.428618	0.0314876	-0.0707768	-0.132719
36.4	0.0716833	0.0683657	0.00851931	0.10883	0.0512278	-0.0647685	0.118889	0.0833117			36.4	0.0920283	-0.0762311	0.15465	0.0641863	0.250978	0.0637181	0.0954777	0.190337		36.4	-0.0637552	0.0357271	0.040922	-0.0326021	0.228677	0.041447	0.181702	0.167576		36.4	0.0962019	0.200118	0.216489	0.17677	0.160388	0.155533	0.211466	0.0689298		36.4	0.320983	0.441637	0.266454	0.677906	0.437853	0.0390782	-0.0675373	-0.131127
36.6	0.0735667	0.0759287	0.00800759	0.107644	0.0497125	-0.0635967	0.119379	0.0798854			36.6	0.0921115	-0.0764628	0.153366	0.0633077	0.252136	0.0645929	0.0970236	0.193118		36.6	-0.0740999	0.0421624	0.0411457	-0.0249089	0.233078	0.0438539	0.182208	0.167453		36.6	0.101225	0.214209	0.233641	0.191588	0.164749	0.168922	0.214877	0.0776502		36.6	0.324949	0.448898	0.276056	0.689711	0.44505	0.0453207	-0.0651037	-0.131914
36.8	0.0749595	0.071975	0.00610988	0.106375	0.0565586	-0.0630902	0.118038	0.0751662			36.8	0.0928843	-0.0780898	0.155047	0.0640487	0.253367	0.0628225	0.0949902	0.197072		36.8	-0.0687351	0.0418354	0.0418166	-0.0326294	0.234524	0.0441743	0.183724	0.169018		36.8	0.10653	0.222922	0.242377	0.203233	0.178967	0.181843	0.229115	0.0816295		36.8	0.3314	0.457255	0.284807	0.698909	0.452119	0.0529524	-0.0600606	-0.132566
37	0.0746376	0.0780585	0.00944629	0.105786	0.057212	-0.0604208	0.117855	0.0728022			37	0.093902	-0.0805915	0.155476	0.064929	0.255743	0.0615351	0.0916597	0.198559		37	-0.0576856	0.0379979	0.0426427	-0.0215879	0.235018	0.0474263	0.182431	0.169276		37	0.115513	0.231496	0.248419	0.212337	0.193326	0.197079	0.23723	0.0884377		37	0.335947	0.466232	0.294417	0.709952	0.459287	0.0579913	-0.0587355	-0.131095
37.2	0.0759668	0.0744953	0.0160467	0.108736	0.0517505	-0.0578575	0.116269	0.0707724			37.2	0.0963497	-0.0799237	0.156655	0.0646165	0.255837	0.0619863	0.0921935	0.199135		37.2	-0.0543939	0.0390973	0.0459647	-0.0309862	0.234364	0.0478591	0.187122	0.16943		37.2	0.118698	0.237502	0.264365	0.226151	0.207528	0.203828	0.24899	0.0913326		37.2	0.339453	0.475861	0.304562	0.721318	0.467978	0.0649153	-0.0539865	-0.130945
37.4	0.0768652	0.0718859	0.0176618	0.110903	0.0533523	-0.0572023	0.116697	0.0665598			37.4	0.095275	-0.0795792	0.158103	0.0653869	0.260441	0.0634754	0.0958159	0.197598		37.4	-0.0646874	0.0407373	0.0486509	-0.0214471	0.235593	0.0478501	0.186248	0.171763		37.4	0.124523	0.249362	0.280095	0.241569	0.212901	0.215717	0.256454	0.0975025		37.4	0.343819	0.485947	0.31499	0.732375	0.475467	0.0720607	-0.0523397	-0.130557
37.6	0.0774723	0.0743601	0.0118531	0.109199	0.0586895	-0.0559628	0.117814	0.0644445			37.6	0.0974717	-0.078394	0.160008	0.0677445	0.261346	0.062022	0.09972	0.196185		37.6	-0.0635495	0.0434043	0.0509384	-0.0300857	0.236504	0.0477142	0.187732	0.17224		37.6	0.129897	0.261454	0.285255	0.249182	0.225551	0.229116	0.265797	0.104659		37.6	0.350091	0.49414	0.325092	0.742829	0.484548	0.0789664	-0.0492404	-0.131023
37.8	0.0787134	0.0703396	0.00884659	0.113142	0.0549017	-0.0551787	0.127444	0.062201			37.8	0.0970943	-0.0771154	0.160228	0.0652767	0.263094	0.0668279	0.103154	0.190993		37.8	-0.0600999	0.0455906	0.0526179	-0.0204354	0.2396	0.0483536	0.189754	0.173731		37.8	0.134989	0.267354	0.296602	0.262111	0.231003	0.23799	0.274704	0.111858		37.8	0.355987	0.503226	0.336263	0.755677	0.491468	0.0860562	-0.0493102	-0.129989
38	0.0782508	0.0756062	0.0045903	0.119461	0.0531103	-0.055289	0.132929	0.0605156			38	0.0983946	-0.0737543	0.162166	0.066093	0.264289	0.072119	0.104578	0.185241		38	-0.0596382	0.0458029	0.0545373	-0.0270961	0.242723	0.0509361	0.192458	0.176558		38	0.14378	0.274672	0.307958	0.275636	0.245628	0.246597	0.283772	0.114771		38	0.361976	0.512554	0.346545	0.766105	0.500932	0.0924755	-0.0440345	-0.131891
38.2	0.079216	0.0768213	0.00905874	0.121936	0.060519	-0.055224	0.140982	0.0581344			38.2	0.0991993	-0.0756743	0.163992	0.0703031	0.264975	0.0736607	0.101998	0.180888		38.2	-0.0594726	0.0467979	0.0549001	-0.018646	0.245528	0.053929	0.192334	0.1747		38.2	0.148586	0.289439	0.31633	0.281419	0.257646	0.258189	0.297178	0.123484		38.2	0.36846	0.524561	0.358344	0.776545	0.509806	0.10058	-0.0440537	-0.132116
38.4	0.077933	0.0808677	0.0204574	0.126848	0.0619718	-0.0530633	0.144454	0.0584984			38.4	0.100964	-0.0765606	0.165466	0.0711613	0.26629	0.0781787	0.101402	0.17669		38.4	-0.0556079	0.0469467	0.0555241	-0.0230819	0.24716	0.0557486	0.192607	0.175086		38.4	0.155145	0.297519	0.326671	0.301559	0.272606	0.26961	0.298006	0.127689		38.4	0.374963	0.534084	0.369293	0.787181	0.518082	0.1064	-0.0403293	-0.13221
38.6	0.0776097	0.0801791	0.0278208	0.131338	0.0577045	-0.0531033	0.148399	0.058442			38.6	0.100664	-0.0758473	0.167244	0.0704704	0.26838	0.0772751	0.105423	0.168483		38.6	-0.0561653	0.0481379	0.0587444	-0.0167427	0.249674	0.0596008	0.19098	0.177112		38.6	0.158264	0.30847	0.344184	0.313022	0.281658	0.286533	0.313223	0.134771		38.6	0.382041	0.543794	0.380283	0.797703	0.524912	0.115549	-0.038378	-0.131418
38.8	0.0761397	0.0820306	0.0220772	0.128345	0.0624083	-0.053489	0.145591	0.0568205			38.8	0.102645	-0.0745164	0.169059	0.0720906	0.270408	0.077147	0.10865	0.162198		38.8	-0.0579945	0.0538763	0.0604655	-0.019993	0.251484	0.0610647	0.191684	0.174927		38.8	0.166792	0.317183	0.355036	0.319971	0.28935	0.293078	0.324868	0.140842		38.8	0.387266	0.553656	0.391165	0.80792	0.535908	0.122773	-0.0343137	-0.131481
39	0.076522	0.0813286	0.0160654	0.125551	0.0648343	-0.0527399	0.144849	0.0547057			39	0.102439	-0.0746917	0.171191	0.0696252	0.271645	0.0783297	0.110551	0.1578		39	-0.0598952	0.054213	0.0624915	-0.0129417	0.252275	0.0597829	0.193111	0.172998		39	0.172085	0.324895	0.367135	0.331655	0.30498	0.30767	0.333168	0.142697		39	0.392194	0.564546	0.401416	0.821268	0.546235	0.132247	-0.0339045	-0.130611
39.2	0.077453	0.0777464	0.00476645	0.123413	0.0581483	-0.0528121	0.145537	0.0537165			39.2	0.101017	-0.0715096	0.171071	0.0668112	0.27476	0.0811409	0.113337	0.150825		39.2	-0.0574949	0.0526635	0.0658379	-0.0154432	0.253405	0.0636088	0.193468	0.175124		39.2	0.173998	0.338291	0.3814	0.340528	0.314962	0.319534	0.340536	0.151749		39.2	0.399721	0.573567	0.411616	0.834128	0.553104	0.138045	-0.0290986	-0.130895
39.4	0.0796567	0.080351	-0.0023358	0.125026	0.0605964	-0.0540497	0.147956	0.051069			39.4	0.10156	-0.0683579	0.171903	0.0695122	0.276575	0.0839007	0.1128	0.145721		39.4	-0.0503506	0.0562833	0.0685749	-0.0127739	0.256594	0.0640961	0.196584	0.172419		39.4	0.180432	0.348646	0.390958	0.35798	0.322888	0.333178	0.347754	0.156754		39.4	0.407017	0.585034	0.423607	0.847287	0.564132	0.148064	-0.0260144	-0.132022
39.6	0.0801571	0.0805938	-0.00037881	0.126549	0.0658187	-0.0535632	0.14901	0.0489476			39.6	0.102835	-0.0665935	0.173257	0.0739463	0.277344	0.0874514	0.113782	0.1423		39.6	-0.0489431	0.0557284	0.0694076	-0.0148877	0.258173	0.0635709	0.199079	0.172082		39.6	0.188147	0.352959	0.400412	0.372925	0.332627	0.344971	0.353284	0.161567		39.6	0.412865	0.59332	0.434442	0.860255	0.573277	0.154266	-0.0229639	-0.132028
39.8	0.0829066	0.0802197	0.00970346	0.131128	0.0619612	-0.0508927	0.14949	0.0497606			39.8	0.102599	-0.0670471	0.172995	0.0762372	0.27902	0.0848465	0.115509	0.141081		39.8	-0.0527334	0.0529377	0.0701709	-0.011124	0.2574	0.064909	0.199721	0.174014		39.8	0.196349	0.367684	0.419091	0.381937	0.347757	0.354726	0.364345	0.172995		39.8	0.418489	0.604525	0.444216	0.872238	0.581253	0.16138	-0.0202893	-0.130999
40	0.0841981	0.0837094	0.0211566	0.133481	0.0642824	-0.0514028	0.149941	0.0503158			40	0.102021	-0.0658366	0.172459	0.0779384	0.279873	0.0878917	0.118189	0.138798		40	-0.0604536	0.0518061	0.0715881	-0.0150592	0.257502	0.0667257	0.20047	0.174017		40	0.201809	0.377955	0.427581	0.396311	0.355414	0.364042	0.375902	0.179225		40	0.426041	0.615353	0.458406	0.883757	0.589882	0.16817	-0.0165221	-0.128337
40.2	0.084802	0.0868448	0.0337665	0.136669	0.0700572	-0.0509261	0.1509	0.049228			40.2	0.103725	-0.0624038	0.174272	0.079489	0.280591	0.0855089	0.119701	0.138848		40.2	-0.065031	0.0473452	0.0710414	-0.0110574	0.258131	0.0662196	0.201679	0.174516		40.2	0.20636	0.38236	0.435486	0.406088	0.367644	0.378236	0.38363	0.185146		40.2	0.431853	0.625345	0.470584	0.897385	0.601626	0.175706	-0.0136993	-0.128184
40.4	0.0861168	0.0849895	0.0367692	0.132585	0.0649855	-0.0497838	0.148917	0.05002			40.4	0.104602	-0.0654617	0.176821	0.0793875	0.280773	0.0845924	0.12017	0.139205		40.4	-0.0594461	0.0411241	0.0709532	-0.0126525	0.25962	0.0687014	0.202345	0.177041		40.4	0.21585	0.401421	0.449941	0.418818	0.378064	0.394019	0.394301	0.185746		40.4	0.437892	0.636191	0.481107	0.909107	0.609071	0.181597	-0.0113295	-0.123228
40.6	0.0892164	0.0872899	0.031118	0.132984	0.0654965	-0.0497806	0.149614	0.0489102			40.6	0.103942	-0.0635523	0.177063	0.0772183	0.284157	0.0837056	0.120943	0.143956		40.6	-0.0446989	0.0365662	0.0709239	-0.00875686	0.261266	0.0711079	0.205569	0.177169		40.6	0.219428	0.408342	0.462142	0.435002	0.391351	0.397837	0.40073	0.189224		40.6	0.444168	0.648955	0.489167	0.919688	0.619173	0.190225	-0.00771547	-0.122662
40.8	0.0885163	0.087183	0.0227894	0.134128	0.071641	-0.0508307	0.152908	0.0481416			40.8	0.105564	-0.0640898	0.179556	0.0755623	0.28475	0.0848276	0.123026	0.15102		40.8	-0.0353348	0.0337754	0.0728798	-0.0109339	0.263828	0.0736406	0.206069	0.174175		40.8	0.228426	0.418582	0.474769	0.442901	0.399606	0.408706	0.4116	0.193821		40.8	0.449977	0.659689	0.500569	0.932668	0.628871	0.19887	-0.00489923	-0.121988
41	0.0903309	0.0836609	0.0143456	0.136223	0.0684436	-0.0489981	0.157854	0.0467019			41	0.106838	-0.064056	0.181851	0.077738	0.286934	0.0805529	0.124496	0.16196		41	-0.0372602	0.0308331	0.0727621	-0.00489619	0.265971	0.0746138	0.208767	0.174949		41	0.232919	0.429112	0.488128	0.458273	0.412785	0.420725	0.418646	0.201458		41	0.455963	0.670394	0.510398	0.945226	0.638037	0.206754	-0.00249366	-0.122506
41.2	0.0912278	0.0858802	0.00685553	0.137001	0.0718311	-0.0502901	0.156607	0.0457425			41.2	0.108587	-0.0664997	0.181962	0.0797628	0.289086	0.0837165	0.126796	0.177854		41.2	-0.0485309	0.0333106	0.0744734	-0.00741703	0.266521	0.0741019	0.20912	0.178343		41.2	0.240854	0.436237	0.500576	0.47057	0.42417	0.432125	0.435104	0.206766		41.2	0.462135	0.681958	0.521607	0.956857	0.647033	0.217396	0.00128684	-0.120306
41.4	0.0932311	0.0846872	0.00813833	0.140853	0.0773108	-0.0490823	0.156198	0.0447418			41.4	0.108817	-0.0631025	0.180054	0.0798775	0.291253	0.0827513	0.127626	0.191952		41.4	-0.060898	0.0374204	0.0752331	-0.000945128	0.266805	0.0748333	0.208708	0.17925		41.4	0.245276	0.443894	0.509914	0.479407	0.433622	0.446104	0.436465	0.216416		41.4	0.471062	0.691432	0.530349	0.968648	0.657106	0.225773	0.00478632	-0.122157
41.6	0.0939316	0.0860317	0.0186439	0.139246	0.072863	-0.0493904	0.156635	0.0459978			41.6	0.109922	-0.0641889	0.182991	0.0817621	0.29233	0.0858231	0.129413	0.207504		41.6	-0.0667973	0.0437709	0.0770249	-0.00539078	0.266542	0.0723042	0.210298	0.182736		41.6	0.250039	0.459629	0.522135	0.493638	0.443794	0.454654	0.444935	0.219144		41.6	0.476486	0.701345	0.544199	0.982255	0.666436	0.233518	0.00767765	-0.121171
41.8	0.0960623	0.0917227	0.0297145	0.140656	0.0754178	-0.0491367	0.15196	0.0463867			41.8	0.109457	-0.0617321	0.184357	0.083434	0.294597	0.0908261	0.130249	0.222309		41.8	-0.0592654	0.0478782	0.0769473	0.00291988	0.265905	0.0701914	0.206945	0.18774		41.8	0.259073	0.469774	0.540142	0.512289	0.457113	0.467997	0.456962	0.222198		41.8	0.483552	0.708946	0.553662	0.994866	0.674228	0.241624	0.0109994	-0.121958
42	0.0977391	0.090253	0.0415244	0.139104	0.0785797	-0.0495362	0.153967	0.0450851			42	0.108924	-0.0574283	0.184399	0.0847059	0.297235	0.0902626	0.131597	0.235381		42	-0.044122	0.0528851	0.0778589	-0.00412914	0.267921	0.0717736	0.208223	0.191413		42	0.264814	0.480326	0.544453	0.519702	0.466428	0.480436	0.466537	0.231951		42	0.492206	0.719586	0.564708	1.00751	0.682021	0.250054	0.0140428	-0.121227
42.2	0.0983328	0.0950653	0.0486739	0.139291	0.0740775	-0.0480308	0.15606	0.0448605			42.2	0.108674	-0.0541799	0.186112	0.085021	0.297242	0.0884797	0.133653	0.246366		42.2	-0.0280221	0.0583472	0.0785227	0.00361786	0.269253	0.0743413	0.208925	0.194356		42.2	0.266487	0.488759	0.558646	0.532964	0.476356	0.48802	0.474204	0.230768		42.2	0.49904	0.730069	0.573379	1.02087	0.690667	0.25726	0.0155855	-0.121611
42.4	0.0965452	0.0954753	0.0482022	0.137223	0.0785711	-0.048678	0.159738	0.0453997			42.4	0.110578	-0.0552521	0.188159	0.0841923	0.299021	0.0910155	0.138435	0.254677		42.4	-0.0264673	0.062029	0.0802132	-0.00366109	0.272599	0.0727865	0.207106	0.196569		42.4	0.272056	0.497873	0.572256	0.540435	0.486012	0.49881	0.48742	0.240302		42.4	0.506115	0.742315	0.584754	1.03325	0.700144	0.265709	0.0200907	-0.121192
42.6	0.0947231	0.091659	0.0405756	0.143297	0.0832561	-0.0483458	0.160925	0.0445871			42.6	0.111917	-0.0534537	0.18687	0.083714	0.298594	0.0937285	0.141171	0.257723		42.6	-0.0333038	0.0620453	0.0804851	0.00600976	0.27451	0.0752099	0.212495	0.196386		42.6	0.281615	0.509821	0.579555	0.557344	0.499593	0.509856	0.489113	0.24475		42.6	0.514223	0.754218	0.59696	1.04617	0.708644	0.27516	0.0244711	-0.120475
42.8	0.0942686	0.094364	0.0295849	0.144045	0.0788921	-0.0460464	0.163554	0.0440784			42.8	0.113136	-0.0519477	0.187755	0.0861916	0.298561	0.0921263	0.141426	0.256972		42.8	-0.0466147	0.0665676	0.0823023	-0.00147819	0.27766	0.0776404	0.21532	0.197316		42.8	0.29324	0.521128	0.592938	0.56593	0.509375	0.520729	0.498391	0.247188		42.8	0.522245	0.768997	0.610878	1.05801	0.717129	0.282478	0.0279851	-0.118967
43	0.0928341	0.0916798	0.0167039	0.147246	0.0834291	-0.0467408	0.164466	0.0457959			43	0.114993	-0.0535619	0.18891	0.0895208	0.298657	0.0939849	0.142445	0.250703		43	-0.0569785	0.0670582	0.0846405	0.007911	0.27893	0.0769295	0.215893	0.197687		43	0.29621	0.532135	0.607153	0.581115	0.519975	0.53119	0.509809	0.256153		43	0.529146	0.778883	0.621423	1.06983	0.726859	0.289813	0.0307252	-0.119329
43.2	0.0932964	0.0904871	0.0101126	0.149412	0.0853046	-0.0468519	0.164403	0.0470641			43.2	0.117281	-0.0526678	0.189156	0.0929727	0.302371	0.0985048	0.143865	0.23545		43.2	-0.0611481	0.067465	0.0849403	0.00153093	0.281857	0.0749567	0.221465	0.195173		43.2	0.303401	0.54161	0.618999	0.591586	0.529334	0.541802	0.516367	0.263623		43.2	0.537187	0.790017	0.63537	1.0812	0.735334	0.298444	0.0330585	-0.118323
43.4	0.0949052	0.0926715	0.00845129	0.152919	0.082225	-0.0453071	0.16476	0.0461334			43.4	0.11609	-0.0499057	0.189102	0.0959836	0.303601	0.0949486	0.146739	0.220569		43.4	-0.0506296	0.0661665	0.0866417	0.0117352	0.281867	0.0758808	0.220484	0.1963		43.4	0.307718	0.553716	0.628606	0.602716	0.540859	0.555883	0.529316	0.266217		43.4	0.54292	0.801866	0.647682	1.0962	0.744524	0.304951	0.0337507	-0.117036
43.6	0.0955057	0.0932291	0.0115822	0.149933	0.0870361	-0.0447016	0.167277	0.0448299			43.6	0.116825	-0.0497067	0.189996	0.0973734	0.30856	0.0939785	0.147908	0.206331		43.6	-0.0344559	0.0646392	0.0877107	0.00667557	0.283281	0.0787462	0.221543	0.197694		43.6	0.315045	0.562247	0.640691	0.617005	0.55139	0.562913	0.535504	0.268237		43.6	0.550545	0.811903	0.658449	1.10764	0.751829	0.312107	0.0355939	-0.117542
43.8	0.0948286	0.0950972	0.0211435	0.151988	0.0882091	-0.045469	0.16935	0.0445696			43.8	0.116153	-0.0486458	0.189167	0.0975651	0.313255	0.0962452	0.149795	0.191434		43.8	-0.0185692	0.0552537	0.0878605	0.0116647	0.285557	0.0796114	0.222955	0.198806		43.8	0.320371	0.57915	0.654414	0.625152	0.561323	0.576772	0.542872	0.274371		43.8	0.556829	0.820483	0.669111	1.12048	0.761793	0.321067	0.0380861	-0.117313
44	0.0942754	0.0943276	0.0311938	0.152589	0.0893054	-0.042752	0.169341	0.0427591			44	0.115876	-0.046982	0.190732	0.0962768	0.315804	0.0965855	0.149159	0.17837		44	-0.0107983	0.0551494	0.0873232	0.00816314	0.288243	0.079442	0.217672	0.198371		44	0.324212	0.584722	0.66904	0.642872	0.571526	0.586408	0.550232	0.277333		44	0.562597	0.832302	0.680529	1.13318	0.7712	0.328752	0.0406802	-0.116895
44.2	0.0927229	0.0958657	0.0408534	0.151919	0.093445	-0.0426325	0.167938	0.0419873			44.2	0.113666	-0.0471153	0.191511	0.09403	0.317158	0.0952709	0.152369	0.171988		44.2	-0.0123277	0.054023	0.0877483	0.0134292	0.289163	0.0805662	0.220564	0.20084		44.2	0.332972	0.592468	0.67675	0.655587	0.584649	0.598546	0.558363	0.28378		44.2	0.569223	0.842503	0.692175	1.14532	0.780658	0.334733	0.0447391	-0.118326
44.4	0.0911508	0.0987869	0.0502519	0.155422	0.0913503	-0.0422852	0.17155	0.041941			44.4	0.11492	-0.0473125	0.193572	0.0936173	0.319849	0.0978982	0.157442	0.1669		44.4	-0.0238242	0.0527601	0.0871213	0.0109693	0.291024	0.0826715	0.22126	0.201906		44.4	0.342395	0.602019	0.688237	0.666195	0.591893	0.606039	0.565271	0.28705		44.4	0.576041	0.851689	0.70561	1.15587	0.787705	0.343337	0.0489356	-0.117698
44.6	0.0912668	0.0946236	0.0595207	0.160558	0.0919307	-0.0397015	0.172817	0.0436955			44.6	0.11391	-0.0458942	0.194276	0.0947747	0.321063	0.0985853	0.158627	0.163911		44.6	-0.038708	0.0523202	0.0874662	0.014392	0.29485	0.0831162	0.218936	0.201876		44.6	0.349051	0.61212	0.701371	0.681854	0.602795	0.618977	0.572992	0.290913		44.6	0.584643	0.862637	0.717802	1.16794	0.797946	0.351468	0.053359	-0.115936
44.8	0.0905492	0.0976211	0.0638191	0.158799	0.0950094	-0.0398846	0.173618	0.0434148			44.8	0.115596	-0.0453115	0.195664	0.0961496	0.321315	0.0996101	0.156359	0.164079		44.8	-0.0525594	0.0580098	0.0873908	0.0160429	0.29689	0.0837266	0.224936	0.202188		44.8	0.356315	0.623664	0.716368	0.693131	0.611102	0.627151	0.577889	0.297832		44.8	0.593655	0.875612	0.728831	1.18076	0.807399	0.357896	0.0569408	-0.115661
45	0.0910679	0.102111	0.0655855	0.159487	0.091335	-0.0398895	0.173225	0.0439405			45	0.118194	-0.0448325	0.195545	0.0993469	0.323866	0.101902	0.161121	0.16928		45	-0.0609517	0.0570741	0.0890328	0.0147309	0.297899	0.0892107	0.22944	0.204821		45	0.358476	0.635701	0.731315	0.703893	0.622226	0.637879	0.591301	0.296546		45	0.600589	0.886031	0.742616	1.19235	0.817332	0.36532	0.0597947	-0.114374
45.2	0.0927297	0.0963912	0.0620909	0.162265	0.0949614	-0.0363418	0.179036	0.0433385			45.2	0.120764	-0.0454336	0.196506	0.103817	0.326299	0.1047	0.165053	0.178882		45.2	-0.0594886	0.0544211	0.0916136	0.0184843	0.298731	0.0908398	0.225732	0.203939		45.2	0.368168	0.645773	0.740072	0.712874	0.631584	0.645031	0.6015	0.305574		45.2	0.607806	0.897608	0.752837	1.20267	0.827231	0.373968	0.0645335	-0.110476
45.4	0.0940957	0.104448	0.0541556	0.161045	0.0979602	-0.0365573	0.180772	0.0434934			45.4	0.119991	-0.0446192	0.196936	0.106391	0.327792	0.104161	0.16525	0.193741		45.4	-0.0495933	0.0561254	0.094073	0.017902	0.301832	0.0927444	0.231744	0.201803		45.4	0.372877	0.660212	0.755508	0.722556	0.643778	0.656816	0.609288	0.311546		45.4	0.616204	0.908374	0.763783	1.21638	0.836956	0.382704	0.0666059	-0.110719
45.6	0.0941384	0.10216	0.0434449	0.160123	0.0966438	-0.0361859	0.181094	0.043864			45.6	0.122862	-0.0440593	0.198259	0.107081	0.331099	0.102431	0.162498	0.210363		45.6	-0.0325144	0.0615906	0.0946513	0.0238979	0.301035	0.092469	0.229608	0.199213		45.6	0.382766	0.664982	0.761043	0.735535	0.65277	0.664528	0.614257	0.315477		45.6	0.621355	0.920203	0.774655	1.22834	0.845921	0.389552	0.0666186	-0.110115
45.8	0.0952996	0.100009	0.0336013	0.163206	0.101541	-0.0339714	0.185525	0.0441019			45.8	0.123104	-0.0441556	0.200451	0.10775	0.333984	0.101134	0.166098	0.230851		45.8	-0.0160008	0.0643493	0.0985514	0.0202413	0.302217	0.0935006	0.23152	0.198652		45.8	0.383954	0.674014	0.773352	0.740574	0.660092	0.678035	0.61901	0.3229		45.8	0.628147	0.92956	0.786559	1.2405	0.855338	0.398657	0.0693981	-0.109127
46	0.095582	0.103187	0.0253238	0.163599	0.102132	-0.0340192	0.190946	0.0441706			46	0.122888	-0.0432073	0.202407	0.107086	0.336177	0.101453	0.170375	0.249172		46	-0.00229996	0.0661097	0.0999848	0.0293239	0.302588	0.0906434	0.23492	0.197046		46	0.390312	0.682401	0.787041	0.757593	0.66734	0.688255	0.630459	0.321001		46	0.635324	0.941514	0.79524	1.25137	0.8628	0.406976	0.0738028	-0.111068
46.2	0.0985403	0.0997836	0.01984	0.165425	0.101361	-0.0349895	0.189916	0.0437815			46.2	0.123372	-0.0402685	0.205052	0.105063	0.337964	0.100762	0.173857	0.261757		46.2	0.00292037	0.0719467	0.101538	0.0220431	0.305027	0.0897737	0.233922	0.199267		46.2	0.399262	0.69911	0.797549	0.769272	0.68307	0.698474	0.635831	0.328946		46.2	0.642061	0.953115	0.809236	1.26468	0.870199	0.415602	0.0740168	-0.11202
46.4	0.0993466	0.0979406	0.0176535	0.165267	0.105707	-0.0335441	0.183411	0.0450689			46.4	0.125036	-0.0403566	0.206446	0.103658	0.340457	0.104478	0.173771	0.264652		46.4	-0.000467255	0.0705174	0.101276	0.0292813	0.302872	0.0886867	0.236973	0.204003		46.4	0.407766	0.708064	0.810242	0.780099	0.68679	0.706425	0.644593	0.33178		46.4	0.649842	0.96538	0.820832	1.27415	0.879543	0.423339	0.0766637	-0.113839
46.6	0.102243	0.10524	0.0173591	0.169557	0.105397	-0.0356393	0.18097	0.043579			46.6	0.124493	-0.0389847	0.207782	0.105513	0.341861	0.106358	0.175565	0.258272		46.6	-0.0153637	0.0689977	0.103977	0.0218857	0.305701	0.0904446	0.243666	0.206956		46.6	0.411327	0.711054	0.819559	0.789487	0.699779	0.71555	0.648528	0.338965		46.6	0.658947	0.97554	0.831714	1.28715	0.887137	0.431198	0.0813571	-0.11295
46.8	0.106605	0.0971653	0.0208188	0.173655	0.106227	-0.0363545	0.182974	0.0447176			46.8	0.125384	-0.0378151	0.208802	0.107899	0.34423	0.110986	0.178917	0.245584		46.8	-0.0316331	0.0680943	0.104789	0.0329929	0.306071	0.0905995	0.238899	0.207775		46.8	0.421249	0.72601	0.83206	0.802807	0.704724	0.723667	0.660217	0.341632		46.8	0.665612	0.990539	0.839708	1.29864	0.895353	0.437907	0.0822379	-0.113863
47	0.110468	0.100757	0.0225129	0.178812	0.107355	-0.0351209	0.185579	0.0460028			47	0.124952	-0.0371216	0.210115	0.110252	0.346181	0.112734	0.183251	0.227637		47	-0.045809	0.0678873	0.104499	0.0267598	0.307619	0.0899029	0.242971	0.212098		47	0.423571	0.740846	0.849027	0.807239	0.717842	0.731906	0.668495	0.343874		47	0.672656	1.00212	0.85211	1.31121	0.904513	0.445204	0.0859054	-0.112227
47.2	0.110496	0.106007	0.0236012	0.182239	0.107409	-0.035061	0.183966	0.0470341			47.2	0.124782	-0.0368768	0.210778	0.11454	0.348595	0.116027	0.183351	0.208285		47.2	-0.0557816	0.067388	0.10483	0.0399079	0.309334	0.0920245	0.248319	0.213241		47.2	0.432986	0.757904	0.854674	0.823191	0.728663	0.742656	0.672779	0.345137		47.2	0.682102	1.01217	0.863016	1.32399	0.913017	0.451805	0.0894845	-0.112627
47.4	0.111148	0.0992026	0.0275075	0.187214	0.111782	-0.0341061	0.190102	0.0462057			47.4	0.124944	-0.0339493	0.212079	0.120662	0.34992	0.116624	0.183402	0.193945		47.4	-0.0580765	0.0728601	0.107479	0.0333372	0.31401	0.0947682	0.244665	0.213161		47.4	0.437986	0.758829	0.867255	0.832012	0.734641	0.751234	0.676841	0.349805		47.4	0.687815	1.02092	0.872565	1.3357	0.922404	0.459008	0.0925483	-0.110642
47.6	0.111916	0.10542	0.0335128	0.185281	0.112284	-0.0329067	0.195684	0.048307			47.6	0.125195	-0.0341058	0.213421	0.122389	0.351122	0.118168	0.187102	0.186034		47.6	-0.0506077	0.0738621	0.108681	0.0423313	0.315027	0.0943567	0.246766	0.215101		47.6	0.445386	0.762939	0.876308	0.844561	0.74406	0.760288	0.687174	0.35711		47.6	0.692878	1.03177	0.885827	1.34484	0.931051	0.465388	0.0943997	-0.111836
47.8	0.111322	0.110501	0.0373183	0.183918	0.114293	-0.0328965	0.193341	0.0474353			47.8	0.126403	-0.0330636	0.215235	0.122674	0.353465	0.119204	0.19305	0.179798		47.8	-0.0405528	0.0769416	0.110602	0.0386257	0.318839	0.0955574	0.249147	0.217663		47.8	0.450001	0.776178	0.888752	0.858276	0.752128	0.773712	0.691792	0.361716		47.8	0.698238	1.04085	0.898558	1.35635	0.939527	0.472422	0.100046	-0.109565
48	0.10911	0.106223	0.0434004	0.183936	0.117715	-0.0309095	0.194247	0.0454052			48	0.127946	-0.0326687	0.215665	0.122507	0.356126	0.121558	0.192361	0.18069		48	-0.0281247	0.0805426	0.114086	0.0429818	0.319603	0.096146	0.243971	0.21534		48	0.457874	0.786435	0.90347	0.86883	0.762241	0.775089	0.700046	0.362849		48	0.705933	1.05054	0.910657	1.36615	0.949146	0.479452	0.101164	-0.110368
48.2	0.108908	0.113294	0.0504902	0.183463	0.117249	-0.0299002	0.197294	0.045535			48.2	0.129568	-0.0309044	0.216011	0.121092	0.356331	0.123587	0.19255	0.190059		48.2	-0.0129584	0.080871	0.115987	0.0412178	0.321705	0.0960527	0.25001	0.21299		48.2	0.469704	0.795212	0.913122	0.876006	0.767839	0.790496	0.708939	0.364728		48.2	0.711016	1.06155	0.919899	1.37774	0.957818	0.486588	0.103737	-0.109066
48.4	0.109406	0.115532	0.0558301	0.18361	0.118548	-0.031387	0.20086	0.0466814			48.4	0.131799	-0.0296087	0.2171	0.11958	0.360521	0.125729	0.195113	0.206006		48.4	0.00201832	0.0820027	0.118392	0.0452451	0.32171	0.0974667	0.250339	0.209934		48.4	0.469647	0.801803	0.920791	0.89081	0.780617	0.795775	0.718358	0.377326		48.4	0.718893	1.07187	0.934214	1.39084	0.963689	0.492972	0.107044	-0.108869
48.6	0.107362	0.112688	0.0602339	0.185677	0.120425	-0.0297335	0.201297	0.0455766			48.6	0.131099	-0.0258386	0.217514	0.121088	0.363039	0.126442	0.200974	0.226654		48.6	0.0110336	0.0838007	0.119562	0.0481969	0.324134	0.0998338	0.247682	0.211609		48.6	0.478642	0.814139	0.939085	0.898517	0.788416	0.801783	0.717145	0.375332		48.6	0.726476	1.08328	0.941207	1.40284	0.971588	0.500941	0.111418	-0.106672
48.8	0.104876	0.118142	0.0665784	0.187059	0.119562	-0.0287763	0.203168	0.044047			48.8	0.131542	-0.0243897	0.217891	0.12094	0.364625	0.123583	0.201088	0.248927		48.8	0.0164509	0.084274	0.120807	0.0458405	0.322473	0.101497	0.25278	0.211909		48.8	0.482481	0.826422	0.947732	0.905686	0.800909	0.814128	0.725913	0.375682		48.8	0.735497	1.0926	0.953663	1.41236	0.97958	0.508436	0.114806	-0.10888
49	0.104756	0.11555	0.0719262	0.188055	0.122095	-0.0301367	0.200428	0.0462649			49	0.132444	-0.02208	0.219268	0.120143	0.36586	0.123609	0.199937	0.267511		49	0.0168072	0.0855102	0.12212	0.054686	0.326726	0.105531	0.257535	0.211672		49	0.49082	0.836533	0.958523	0.918456	0.809492	0.820118	0.732821	0.382734		49	0.743005	1.10349	0.962657	1.42568	0.987488	0.516525	0.118445	-0.106885
49.2	0.103118	0.114891	0.0764444	0.18952	0.122372	-0.0281816	0.202635	0.0459874			49.2	0.132329	-0.0212514	0.220827	0.120593	0.369729	0.125893	0.202448	0.27619		49.2	0.0107929	0.0866697	0.1233	0.0516007	0.32812	0.109872	0.252627	0.212324		49.2	0.496031	0.841262	0.967841	0.924659	0.816494	0.827104	0.738338	0.389664		49.2	0.751436	1.11459	0.973414	1.4357	0.995417	0.524064	0.122024	-0.107737
49.4	0.102891	0.119895	0.0818892	0.188544	0.124017	-0.026253	0.198418	0.045177			49.4	0.131568	-0.0206729	0.222446	0.120539	0.369438	0.126403	0.208885	0.271284		49.4	-0.000999034	0.0866587	0.123549	0.0608173	0.333891	0.108257	0.259884	0.217139		49.4	0.506665	0.851878	0.980919	0.938175	0.821793	0.835535	0.752295	0.393964		49.4	0.758227	1.12482	0.980643	1.446	1.00424	0.530992	0.123512	-0.108161
49.6	0.102912	0.113873	0.0867672	0.192322	0.125703	-0.0259717	0.198991	0.0450386			49.6	0.134245	-0.0223838	0.224155	0.122094	0.371515	0.129658	0.211397	0.257476		49.6	-0.0120032	0.0867298	0.125326	0.0549012	0.334698	0.108126	0.262349	0.216441		49.6	0.508698	0.860031	0.989365	0.945435	0.834787	0.85001	0.754984	0.391543		49.6	0.764684	1.13392	0.995122	1.45764	1.01051	0.537595	0.126694	-0.108342
49.8	0.104008	0.118182	0.0881354	0.193888	0.125958	-0.0242191	0.200741	0.0465712			49.8	0.134501	-0.0214644	0.224743	0.126751	0.373907	0.131787	0.20991	0.236786		49.8	-0.0243891	0.0871884	0.1262	0.0651005	0.339747	0.111749	0.261576	0.215436		49.8	0.516862	0.869464	0.998439	0.958068	0.839136	0.849638	0.757369	0.395403		49.8	0.770559	1.14474	1.00561	1.46922	1.01861	0.543838	0.127566	-0.106359
50	0.103989	0.120977	0.0909973	0.197893	0.129808	-0.0229937	0.199657	0.047351			50	0.134394	-0.0209555	0.22565	0.130592	0.37724	0.133608	0.21343	0.216687		50	-0.0343757	0.0897103	0.125895	0.0613885	0.342541	0.111901	0.265337	0.21772		50	0.526095	0.881212	1.00735	0.967095	0.84553	0.858812	0.765878	0.39745		50	0.778044	1.15513	1.0169	1.47763	1.0265	0.549564	0.130306	-0.10625
50.2	0.105785	0.113659	0.0933968	0.200989	0.13167	-0.0234478	0.202256	0.048881			50.2	0.135845	-0.0197797	0.226202	0.137009	0.38064	0.134329	0.220986	0.19991		50.2	-0.0409124	0.0928213	0.12728	0.066737	0.346633	0.111165	0.268566	0.219694		50.2	0.530216	0.892148	1.02189	0.974738	0.852814	0.870242	0.767131	0.407244		50.2	0.784607	1.16533	1.0263	1.48753	1.03411	0.555832	0.133366	-0.107053
50.4	0.106275	0.119013	0.0933197	0.204303	0.131291	-0.0231092	0.209961	0.0501413			50.4	0.137305	-0.0177427	0.228204	0.14145	0.384718	0.137713	0.22306	0.194714		50.4	-0.044135	0.0951219	0.129032	0.0662199	0.346366	0.114183	0.267168	0.216131		50.4	0.535562	0.901331	1.03308	0.982186	0.862184	0.877919	0.771518	0.405383		50.4	0.791997	1.17638	1.03602	1.49772	1.04216	0.563769	0.138469	-0.105695
50.6	0.109546	0.12197	0.0934116	0.205538	0.134748	-0.0225002	0.211146	0.0502359			50.6	0.137371	-0.0168951	0.230768	0.143144	0.387434	0.139602	0.220494	0.196797		50.6	-0.045417	0.100047	0.13042	0.0697581	0.350197	0.116123	0.270808	0.21452		50.6	0.541199	0.908868	1.03983	0.994554	0.870877	0.883993	0.778988	0.405456		50.6	0.800085	1.1871	1.04669	1.5071	1.05215	0.571009	0.140085	-0.106522
50.8	0.111313	0.11437	0.0946217	0.207718	0.134996	-0.0229331	0.211705	0.0510958			50.8	0.13939	-0.015137	0.232902	0.141918	0.390153	0.143686	0.224746	0.209215		50.8	-0.0430791	0.101228	0.133059	0.0734186	0.352159	0.111927	0.268531	0.216313		50.8	0.546864	0.920993	1.04671	1.00142	0.880584	0.888708	0.792027	0.414384		50.8	0.80777	1.19674	1.05645	1.51675	1.05955	0.577773	0.14189	-0.10573
51	0.114122	0.122722	0.0945028	0.20461	0.137477	-0.0236058	0.21327	0.052013			51	0.139716	-0.0123885	0.234531	0.141589	0.393317	0.145553	0.231064	0.229538		51	-0.039667	0.101151	0.135325	0.0716821	0.35415	0.110913	0.26606	0.219182		51	0.558486	0.927366	1.06495	1.01622	0.886681	0.898221	0.794503	0.417117		51	0.815463	1.20689	1.06488	1.52698	1.06727	0.584976	0.141672	-0.106681
51.2	0.117964	0.125291	0.0951273	0.204309	0.140354	-0.0240785	0.211207	0.0527126			51.2	0.139474	-0.0130729	0.235664	0.139623	0.395252	0.145978	0.233381	0.254814		51.2	-0.0360043	0.0979907	0.137682	0.0791565	0.3546	0.112632	0.270374	0.220045		51.2	0.560076	0.93836	1.06689	1.0264	0.894802	0.903218	0.797846	0.418988		51.2	0.821902	1.21886	1.07647	1.53624	1.07526	0.592505	0.142792	-0.104716
51.4	0.11921	0.12118	0.0968045	0.209297	0.142435	-0.0233685	0.212556	0.0533207			51.4	0.139653	-0.0138009	0.235551	0.140711	0.395513	0.142688	0.233973	0.27296		51.4	-0.0315623	0.0996352	0.139256	0.0743231	0.355999	0.111679	0.267372	0.223566		51.4	0.566862	0.94974	1.07949	1.03012	0.901393	0.913508	0.807114	0.422448		51.4	0.829016	1.22964	1.08982	1.54754	1.08287	0.59782	0.143965	-0.103193
51.6	0.118032	0.127453	0.0975562	0.212528	0.146794	-0.0233942	0.216317	0.0545423			51.6	0.140266	-0.0124623	0.236173	0.142523	0.397685	0.143096	0.236102	0.284145		51.6	-0.0285903	0.0960467	0.140868	0.0833004	0.358105	0.112972	0.266585	0.225892		51.6	0.573339	0.95666	1.0917	1.03858	0.909769	0.921916	0.808381	0.422964		51.6	0.835873	1.23898	1.09992	1.55749	1.08972	0.603283	0.146097	-0.104457
51.8	0.118723	0.126906	0.0985442	0.214444	0.146997	-0.0233564	0.223113	0.0561793			51.8	0.140624	-0.0117811	0.236117	0.144034	0.400372	0.142875	0.241426	0.285471		51.8	-0.0270676	0.0981953	0.140724	0.0783072	0.359186	0.116834	0.274974	0.226931		51.8	0.580715	0.961698	1.10043	1.04666	0.916223	0.925036	0.820638	0.429681		51.8	0.84233	1.25109	1.10832	1.56783	1.09744	0.609332	0.15013	-0.104667
52	0.120765	0.123864	0.0992708	0.215571	0.151016	-0.0217433	0.229713	0.0549245			52	0.141131	-0.0135263	0.237467	0.145588	0.400749	0.145742	0.245107	0.274727		52	-0.0270169	0.101026	0.140774	0.0840216	0.359367	0.123315	0.276847	0.226351		52	0.589102	0.974686	1.10974	1.05623	0.921433	0.937291	0.822333	0.434718		52	0.849873	1.26082	1.11892	1.57779	1.10268	0.614502	0.154728	-0.103632
52.2	0.119289	0.131358	0.0994384	0.218881	0.152239	-0.0206265	0.231804	0.0567923			52.2	0.141021	-0.0123104	0.238709	0.146345	0.402198	0.143904	0.243049	0.255395		52.2	-0.0280595	0.107383	0.141953	0.0837246	0.362707	0.124832	0.276436	0.228247		52.2	0.593059	0.978193	1.12257	1.06709	0.929338	0.94395	0.824423	0.435857		52.2	0.85693	1.26837	1.12917	1.58967	1.10891	0.621288	0.159201	-0.104658
52.4	0.122832	0.126838	0.0993785	0.220238	0.152577	-0.0189757	0.232229	0.0566265			52.4	0.142034	-0.0114484	0.240545	0.146179	0.406041	0.148598	0.2428	0.236495		52.4	-0.02839	0.10886	0.144265	0.089102	0.366714	0.129423	0.283939	0.228775		52.4	0.601826	0.99459	1.13239	1.07402	0.935067	0.946355	0.831348	0.442125		52.4	0.863638	1.2781	1.13827	1.59841	1.11665	0.627633	0.162519	-0.105668
52.6	0.12556	0.128486	0.0999598	0.219069	0.154394	-0.0173579	0.22978	0.0580684			52.6	0.143314	-0.00838933	0.24225	0.14769	0.40899	0.151795	0.250631	0.219693		52.6	-0.028718	0.112438	0.146581	0.0908208	0.369388	0.133493	0.283209	0.231576		52.6	0.610154	0.998103	1.13639	1.07967	0.94618	0.952803	0.839146	0.440205		52.6	0.869462	1.28787	1.14742	1.60976	1.1235	0.634714	0.164037	-0.103376
52.8	0.127782	0.134991	0.0992336	0.223992	0.156898	-0.0172835	0.227201	0.0580058			52.8	0.14239	-0.00680472	0.245663	0.151653	0.412904	0.153002	0.253477	0.212419		52.8	-0.0276051	0.113123	0.148581	0.0901793	0.372297	0.136422	0.283734	0.232191		52.8	0.616089	1.00706	1.14402	1.08786	0.951933	0.961689	0.843661	0.445657		52.8	0.877176	1.29612	1.15565	1.62007	1.12961	0.640719	0.164214	-0.102297
53	0.12927	0.129986	0.100574	0.229494	0.157483	-0.016641	0.224308	0.0597537			53	0.143748	-0.00550505	0.247805	0.156149	0.416199	0.155948	0.250991	0.21503		53	-0.0275197	0.114357	0.151999	0.0968194	0.376455	0.134677	0.288171	0.23086		53	0.618169	1.01648	1.1536	1.09424	0.95757	0.969279	0.847459	0.446362		53	0.883183	1.30513	1.16751	1.62807	1.13771	0.648485	0.16589	-0.102241
53.2	0.131035	0.131651	0.103405	0.231154	0.161145	-0.0150958	0.229486	0.0591639			53.2	0.145971	-0.00376534	0.251527	0.162349	0.4209	0.159445	0.25317	0.23281		53.2	-0.0272279	0.117301	0.15288	0.096603	0.377194	0.135699	0.286581	0.227458		53.2	0.619779	1.02614	1.1679	1.11187	0.966693	0.970172	0.851529	0.449283		53.2	0.890118	1.3151	1.17648	1.63558	1.14553	0.652695	0.168487	-0.100559
53.4	0.130361	0.137912	0.10415	0.230837	0.162082	-0.0159413	0.229571	0.059309			53.4	0.1462	-0.00150625	0.253844	0.166602	0.423612	0.164106	0.26092	0.255899		53.4	-0.0271639	0.117275	0.153737	0.102532	0.380325	0.136382	0.288753	0.224268		53.4	0.631083	1.03265	1.17409	1.11268	0.968211	0.979693	0.855853	0.44905		53.4	0.896907	1.32446	1.18662	1.64486	1.15049	0.659504	0.16871	-0.0982351
53.6	0.131658	0.13064	0.106341	0.234924	0.163858	-0.0147103	0.233548	0.0586765			53.6	0.145893	-0.000845113	0.254575	0.169296	0.427384	0.162948	0.262234	0.277534		53.6	-0.0281335	0.118759	0.154796	0.103302	0.38114	0.136451	0.296289	0.216326		53.6	0.639601	1.04274	1.18557	1.12432	0.979876	0.982109	0.86252	0.458082		53.6	0.904704	1.33294	1.19439	1.65229	1.15697	0.663996	0.1726	-0.0987206
53.8	0.131467	0.135466	0.109475	0.234376	0.165549	-0.0138214	0.23692	0.0587626			53.8	0.147966	-0.00130028	0.255445	0.170281	0.428806	0.167493	0.260894	0.286817		53.8	-0.0294326	0.120627	0.157717	0.109068	0.385129	0.13991	0.293476	0.209034		53.8	0.642339	1.05224	1.19349	1.13093	0.984514	0.9913	0.864025	0.453611		53.8	0.911506	1.34217	1.20304	1.65906	1.16498	0.669231	0.177231	-0.099476
54	0.132436	0.141313	0.113927	0.234486	0.165818	-0.0135187	0.241244	0.0591121			54	0.14864	0.000979458	0.255957	0.171521	0.431627	0.1658	0.26348	0.284229		54	-0.0279814	0.121313	0.158929	0.112302	0.387564	0.142587	0.293736	0.204456		54	0.647254	1.05777	1.19793	1.14297	0.991081	1.00115	0.865241	0.457422		54	0.917908	1.35078	1.21235	1.66897	1.17019	0.675101	0.179616	-0.100277
54.2	0.133096	0.134957	0.115005	0.23481	0.167698	-0.0130582	0.245142	0.0589499			54.2	0.148883	0.00268476	0.256345	0.17153	0.43333	0.164906	0.272075	0.267337		54.2	-0.0270106	0.119747	0.160199	0.111095	0.392469	0.144283	0.303205	0.203598		54.2	0.656958	1.07912	1.21333	1.14805	0.997833	0.996826	0.873139	0.461672		54.2	0.922639	1.35903	1.22053	1.67679	1.17739	0.681121	0.181018	-0.0999305
54.4	0.135521	0.13997	0.117432	0.240876	0.16995	-0.0125595	0.247484	0.0600121			54.4	0.151835	0.00486844	0.25761	0.172434	0.436643	0.160793	0.274034	0.244441		54.4	-0.0280609	0.121377	0.161808	0.1157	0.393454	0.147793	0.301265	0.203929		54.4	0.6676	1.0768	1.22322	1.15687	1.00501	1.00777	0.87763	0.46399		54.4	0.929192	1.36982	1.22886	1.68454	1.18549	0.685548	0.185197	-0.10068
54.6	0.137095	0.142554	0.118674	0.242105	0.172714	-0.0124697	0.24715	0.0593445			54.6	0.153069	0.00556035	0.259332	0.173904	0.440396	0.161218	0.274313	0.225607		54.6	-0.0278285	0.122742	0.164544	0.113418	0.397351	0.149862	0.29942	0.207867		54.6	0.666797	1.08286	1.22865	1.1586	1.01005	1.01577	0.8821	0.464726		54.6	0.937179	1.3791	1.23793	1.69244	1.19149	0.693394	0.186103	-0.0999452
54.8	0.139118	0.137247	0.120426	0.242468	0.174503	-0.00937645	0.25367	0.0600566			54.8	0.152807	0.00793727	0.261601	0.175277	0.44486	0.158649	0.278227	0.218878		54.8	-0.026924	0.121717	0.165074	0.119415	0.39963	0.151582	0.306224	0.214619		54.8	0.673265	1.09009	1.24049	1.16842	1.01484	1.01922	0.88331	0.468306		54.8	0.943442	1.38813	1.25024	1.70033	1.19668	0.698697	0.187362	-0.101631
55	0.137097	0.143174	0.12048	0.247825	0.177505	-0.00869246	0.256888	0.0595882			55	0.155318	0.009745	0.263605	0.177565	0.446236	0.161028	0.285834	0.227165		55	-0.0266456	0.120745	0.170172	0.11753	0.402026	0.155022	0.306076	0.225825		55	0.678345	1.09688	1.24454	1.17346	1.02042	1.02712	0.893255	0.46986		55	0.949069	1.39694	1.2587	1.70822	1.20366	0.70262	0.189245	-0.0987337
55.2	0.140243	0.144238	0.122483	0.252377	0.179774	-0.00669013	0.256956	0.0584443			55.2	0.155862	0.0105534	0.265816	0.179049	0.44949	0.164139	0.286756	0.247751		55.2	-0.0262412	0.118245	0.171826	0.125555	0.403842	0.156394	0.303394	0.234885		55.2	0.687012	1.10745	1.25428	1.17993	1.02593	1.03289	0.897962	0.476924		55.2	0.957527	1.40504	1.26912	1.71796	1.20792	0.708169	0.190991	-0.0977206
55.4	0.141619	0.142082	0.125042	0.25127	0.18118	-0.00466383	0.256523	0.0570223			55.4	0.155542	0.010804	0.267254	0.181688	0.451042	0.166236	0.286279	0.272187		55.4	-0.0244701	0.118589	0.172963	0.128321	0.409075	0.158373	0.309993	0.241869		55.4	0.689809	1.11513	1.26188	1.18844	1.03332	1.03543	0.900589	0.47585		55.4	0.96552	1.41124	1.27745	1.7267	1.2121	0.713974	0.194617	-0.0982716
55.6	0.144104	0.15007	0.127408	0.25035	0.183984	-0.00324549	0.266453	0.0580703			55.6	0.156209	0.0118644	0.270254	0.180867	0.450861	0.169121	0.290418	0.290988		55.6	-0.0227832	0.117783	0.174997	0.129699	0.411216	0.160413	0.309859	0.24769		55.6	0.699748	1.12358	1.26687	1.20207	1.0361	1.04287	0.903991	0.478064		55.6	0.970419	1.41963	1.28607	1.73448	1.21951	0.717718	0.198124	-0.0983383
55.8	0.14742	0.147061	0.130278	0.255559	0.185431	-0.00386879	0.260399	0.0581104			55.8	0.157222	0.0124485	0.269974	0.181339	0.451525	0.16988	0.298865	0.296994		55.8	-0.021057	0.119619	0.177726	0.134605	0.414046	0.161988	0.305676	0.252728		55.8	0.705624	1.13257	1.27728	1.20186	1.04132	1.04933	0.905963	0.482288		55.8	0.97722	1.42775	1.2906	1.74279	1.22551	0.723803	0.200181	-0.0952035
56	0.150707	0.145445	0.133562	0.254172	0.186689	-0.00216403	0.260991	0.0587994			56	0.157677	0.0128458	0.271873	0.180573	0.454938	0.16921	0.298651	0.288555		56	-0.0184121	0.12382	0.176811	0.135301	0.419039	0.164126	0.311005	0.251395		56	0.711981	1.13725	1.28346	1.20888	1.04575	1.05151	0.918132	0.488357		56	0.986597	1.43419	1.29682	1.74939	1.23174	0.73022	0.204426	-0.0967228
56.2	0.151847	0.153966	0.134344	0.254245	0.188605	-0.00179375	0.260463	0.0607619			56.2	0.158614	0.014681	0.274267	0.180418	0.4563	0.1696	0.298511	0.269192		56.2	-0.0143644	0.129355	0.181412	0.14046	0.424068	0.170066	0.31044	0.251132		56.2	0.721201	1.15179	1.29378	1.21101	1.05626	1.06045	0.914215	0.488331		56.2	0.992543	1.44172	1.30378	1.75628	1.23722	0.735941	0.205764	-0.0979661
56.4	0.153189	0.148351	0.134869	0.25764	0.192114	0.000381646	0.262806	0.062785			56.4	0.15806	0.0173797	0.276173	0.181133	0.460383	0.173254	0.304464	0.247988		56.4	-0.0103558	0.13295	0.184228	0.14026	0.425994	0.172401	0.304888	0.252187		56.4	0.723878	1.15366	1.29765	1.22731	1.05989	1.06434	0.918654	0.48878		56.4	0.998519	1.44836	1.31218	1.76225	1.24299	0.74071	0.207094	-0.0947693
56.6	0.15247	0.148408	0.134611	0.264781	0.193847	0.000913433	0.257269	0.0634874			56.6	0.15988	0.017967	0.277502	0.183324	0.464661	0.172596	0.308865	0.235381		56.6	-0.00520669	0.135633	0.185711	0.14475	0.42864	0.172427	0.313	0.254888		56.6	0.724744	1.1593	1.30639	1.23275	1.06267	1.07065	0.926177	0.490618		56.6	1.00684	1.45669	1.32023	1.77109	1.24901	0.747049	0.209894	-0.0936669
56.8	0.149783	0.155669	0.133194	0.266188	0.196128	0.00273527	0.261826	0.0629559			56.8	0.159878	0.018993	0.280385	0.185764	0.46852	0.175284	0.307013	0.240469		56.8	9.56941e-06	0.139073	0.186774	0.147535	0.431536	0.176684	0.319925	0.255881		56.8	0.734754	1.17498	1.3132	1.23587	1.07374	1.07448	0.929297	0.495955		56.8	1.01358	1.4654	1.33009	1.77707	1.25439	0.751445	0.212248	-0.0941727
57	0.149896	0.149462	0.128916	0.273695	0.199314	0.00358649	0.263552	0.0642889			57	0.159553	0.0202778	0.281362	0.188441	0.470901	0.179209	0.308495	0.257285		57	0.00352025	0.138818	0.189666	0.148169	0.434272	0.179211	0.317014	0.256555		57	0.741153	1.17397	1.32564	1.24263	1.07772	1.07592	0.931581	0.495134		57	1.01753	1.47475	1.33916	1.78631	1.26024	0.756035	0.21203	-0.0931978
57.2	0.151363	0.150478	0.126106	0.278852	0.202141	0.00347729	0.26794	0.0650287			57.2	0.160745	0.0206229	0.28241	0.19279	0.475023	0.183172	0.317129	0.279893		57.2	0.00928127	0.138419	0.189855	0.15427	0.435436	0.182484	0.3239	0.25783		57.2	0.748615	1.18963	1.33368	1.24612	1.08236	1.08834	0.939303	0.496497		57.2	1.02488	1.48451	1.34896	1.79424	1.26615	0.760989	0.216233	-0.0918076
57.4	0.152696	0.15803	0.123488	0.28141	0.204261	0.00162863	0.270939	0.064795			57.4	0.161332	0.0194967	0.283185	0.194708	0.479038	0.185622	0.320363	0.295969		57.4	0.0171233	0.13784	0.191084	0.152763	0.438813	0.184599	0.329865	0.259656		57.4	0.753416	1.19282	1.3376	1.25365	1.08545	1.08725	0.937949	0.501485		57.4	1.029	1.4947	1.35696	1.80281	1.27228	0.765709	0.218076	-0.0950898
57.6	0.152973	0.152489	0.118969	0.281036	0.205395	0.00269299	0.277729	0.0665635			57.6	0.160973	0.0207414	0.284488	0.199957	0.482863	0.189502	0.31977	0.299174		57.6	0.024784	0.136941	0.193023	0.161164	0.440531	0.191865	0.326182	0.260261		57.6	0.75495	1.20161	1.34705	1.25895	1.09446	1.08838	0.943226	0.501465		57.6	1.0347	1.50084	1.36601	1.80874	1.27549	0.769243	0.219693	-0.0944315
57.8	0.156597	0.158513	0.115465	0.28492	0.208291	0.00348795	0.280781	0.0677867			57.8	0.162365	0.0229545	0.286582	0.20529	0.484431	0.193552	0.322416	0.286676		57.8	0.0326429	0.138635	0.196043	0.161148	0.445216	0.194426	0.327131	0.260287		57.8	0.75777	1.20532	1.35371	1.268	1.09591	1.09693	0.942889	0.508712		57.8	1.04091	1.50722	1.376	1.81697	1.28268	0.775235	0.220973	-0.0952685
58	0.159793	0.162955	0.112397	0.285235	0.210562	0.00524144	0.276361	0.0667031			58	0.162753	0.0258804	0.28858	0.210357	0.491084	0.195266	0.330738	0.267312		58	0.0414509	0.141706	0.198274	0.165914	0.447875	0.198245	0.333698	0.262654		58	0.772498	1.2121	1.36203	1.27349	1.09982	1.10364	0.948354	0.509154		58	1.04723	1.51443	1.38492	1.8243	1.28643	0.77954	0.224599	-0.0954585
58.2	0.158784	0.158807	0.109365	0.28657	0.211429	0.00682583	0.275631	0.0676353			58.2	0.162413	0.0294025	0.289695	0.214959	0.49461	0.198068	0.331869	0.248857		58.2	0.0512889	0.141772	0.200222	0.169221	0.452217	0.193506	0.331732	0.262587		58.2	0.776452	1.22249	1.36201	1.28389	1.10555	1.10521	0.957046	0.508755		58.2	1.05172	1.52185	1.39158	1.83191	1.29274	0.784506	0.225437	-0.0981385
58.4	0.159302	0.164354	0.107206	0.286278	0.215382	0.00882218	0.280332	0.0689561			58.4	0.163347	0.0317133	0.29257	0.220237	0.496047	0.198834	0.331641	0.244771		58.4	0.0577176	0.142644	0.204061	0.172396	0.455772	0.195191	0.334672	0.261679		58.4	0.782989	1.22929	1.37207	1.28916	1.11037	1.10663	0.958375	0.510556		58.4	1.05896	1.52883	1.39898	1.83803	1.29724	0.789266	0.226868	-0.0985184
58.6	0.159555	0.166519	0.105775	0.289874	0.21664	0.0112327	0.278658	0.0691582			58.6	0.165157	0.0325414	0.293925	0.224522	0.500058	0.202757	0.339982	0.260123		58.6	0.0633677	0.147876	0.205985	0.176645	0.461137	0.195717	0.338928	0.261854		58.6	0.785686	1.23881	1.37964	1.29293	1.11357	1.11348	0.958373	0.510338		58.6	1.06503	1.54031	1.40578	1.84681	1.30505	0.793265	0.228152	-0.098451
58.8	0.159246	0.161417	0.104028	0.288901	0.221143	0.0100875	0.277775	0.0700447			58.8	0.165213	0.0352785	0.294941	0.227629	0.504609	0.203422	0.345979	0.28123		58.8	0.0675529	0.150221	0.207701	0.178623	0.463176	0.196029	0.334957	0.26253		58.8	0.796973	1.24126	1.38658	1.3006	1.12448	1.11392	0.960591	0.51324		58.8	1.07158	1.54745	1.4133	1.85267	1.31031	0.797143	0.232076	-0.0977216
59	0.158293	0.169185	0.102739	0.290723	0.22236	0.00905385	0.285021	0.0709717			59	0.167079	0.0362657	0.297021	0.230322	0.506734	0.207892	0.342875	0.297793		59	0.0728455	0.15216	0.210467	0.182736	0.466646	0.196366	0.334633	0.262795		59	0.796006	1.24877	1.39575	1.30193	1.12322	1.12033	0.968656	0.513625		59	1.07777	1.55569	1.41993	1.85765	1.31571	0.802322	0.233547	-0.0975963
59.2	0.158393	0.168341	0.101823	0.293327	0.223812	0.00935806	0.287133	0.0711574			59.2	0.169215	0.0344574	0.300023	0.234752	0.509576	0.208947	0.343822	0.298117		59.2	0.0733693	0.158363	0.2135	0.183021	0.469321	0.20005	0.339247	0.263074		59.2	0.804872	1.25363	1.40029	1.31095	1.13098	1.12499	0.968044	0.52405		59.2	1.085	1.56453	1.42672	1.86358	1.31898	0.807265	0.237006	-0.0936877
59.4	0.158687	0.164059	0.102121	0.299589	0.227871	0.0112698	0.28714	0.0713442			59.4	0.170748	0.0343897	0.301786	0.236747	0.51235	0.209088	0.353189	0.289494		59.4	0.0717573	0.16029	0.214296	0.186487	0.47049	0.200426	0.336258	0.26403		59.4	0.808742	1.26567	1.41333	1.31743	1.13201	1.12884	0.969939	0.525078		59.4	1.09118	1.57335	1.43286	1.86948	1.32632	0.811878	0.237696	-0.0917276
59.6	0.159267	0.172718	0.10436	0.301045	0.228525	0.0110643	0.289499	0.0708655			59.6	0.170761	0.0381989	0.304176	0.237926	0.514439	0.212004	0.354148	0.270526		59.6	0.0688631	0.160229	0.215634	0.190376	0.473044	0.200463	0.338317	0.266977		59.6	0.813618	1.26391	1.4096	1.32185	1.13979	1.13051	0.974804	0.518843		59.6	1.09715	1.57845	1.44313	1.87392	1.32867	0.81598	0.240847	-0.0921695
59.8	0.161609	0.169796	0.108394	0.307714	0.232143	0.0131761	0.290264	0.0707698			59.8	0.173014	0.037801	0.306644	0.239132	0.517973	0.214168	0.353513	0.260596		59.8	0.0632601	0.160393	0.218082	0.190091	0.475608	0.197475	0.347265	0.26829		59.8	0.824315	1.27289	1.41898	1.32267	1.14136	1.138	0.982083	0.526302		59.8	1.10301	1.58883	1.44797	1.88075	1.33165	0.820537	0.240714	-0.0918505
60	0.163987	0.167903	0.115151	0.310371	0.233819	0.0166127	0.293541	0.0707075			60	0.173712	0.0382347	0.309268	0.240621	0.520514	0.214455	0.363185	0.267796		60	0.0547278	0.159692	0.218196	0.196866	0.479846	0.199044	0.348221	0.268736		60	0.825668	1.27618	1.42524	1.3304	1.14195	1.13982	0.983928	0.520026		60	1.10984	1.59573	1.45625	1.88695	1.33594	0.824406	0.242993	-0.0908778
60.2	0.167797	0.17732	0.121654	0.31441	0.237672	0.0186221	0.293711	0.0717619			60.2	0.175059	0.0410321	0.31115	0.240249	0.523078	0.21566	0.372245	0.286738		60.2	0.0439506	0.1603	0.219721	0.198065	0.483178	0.202434	0.349127	0.269828		60.2	0.829953	1.28628	1.43125	1.3374	1.14942	1.14012	0.987344	0.531157		60.2	1.11737	1.59954	1.46376	1.89339	1.3411	0.827548	0.245577	-0.0916826
60.4	0.165838	0.173545	0.129361	0.314469	0.242238	0.0162062	0.294537	0.0728098			60.4	0.176921	0.04406	0.314739	0.240886	0.529023	0.219803	0.369494	0.300111		60.4	0.034519	0.162466	0.223178	0.202953	0.48688	0.203086	0.355482	0.272163		60.4	0.829882	1.28847	1.4394	1.33873	1.15317	1.14949	0.985834	0.530821		60.4	1.12242	1.60702	1.47073	1.89857	1.34541	0.832049	0.24911	-0.0910385
60.6	0.168518	0.171829	0.14011	0.315705	0.242581	0.0169626	0.296269	0.07545			60.6	0.178182	0.0425881	0.317225	0.243521	0.532481	0.219577	0.371273	0.301595		60.6	0.0245219	0.163421	0.227596	0.20611	0.490532	0.203406	0.355091	0.272847		60.6	0.840744	1.30075	1.4449	1.34111	1.15754	1.1552	0.988623	0.530143		60.6	1.12869	1.61357	1.47407	1.90454	1.35138	0.837523	0.249788	-0.0919005
60.8	0.173501	0.179876	0.148878	0.315275	0.248195	0.0175061	0.300312	0.0761922			60.8	0.178334	0.0449614	0.31959	0.245396	0.536392	0.221822	0.379947	0.293974		60.8	0.0164882	0.166711	0.230259	0.209861	0.494359	0.203465	0.354389	0.27252		60.8	0.845479	1.30748	1.44671	1.35066	1.1607	1.15679	0.993978	0.535273		60.8	1.13497	1.61747	1.48239	1.91116	1.35574	0.840249	0.253814	-0.0912945
61	0.173335	0.174528	0.158832	0.316472	0.247302	0.016492	0.29795	0.0784266			61	0.17835	0.0472531	0.320637	0.246586	0.541131	0.22081	0.382474	0.277682		61	0.00914635	0.170542	0.235163	0.21461	0.49698	0.200729	0.359696	0.271521		61	0.857126	1.31644	1.45454	1.35515	1.1659	1.15481	0.989876	0.538856		61	1.14072	1.62406	1.4878	1.9165	1.36101	0.843886	0.254976	-0.0914217
61.2	0.174273	0.174672	0.168838	0.317501	0.253578	0.0187473	0.302584	0.0769964			61.2	0.178496	0.0498051	0.322288	0.25001	0.545565	0.222826	0.380178	0.272327		61.2	0.00564728	0.172128	0.23684	0.217506	0.499851	0.200162	0.360735	0.272623		61.2	0.856254	1.31994	1.45841	1.35835	1.1671	1.15821	0.996121	0.536349		61.2	1.14404	1.63191	1.49527	1.92117	1.36643	0.847273	0.255189	-0.0908044
61.4	0.179898	0.183187	0.175933	0.321492	0.252853	0.0216228	0.303965	0.0766913			61.4	0.177083	0.0514236	0.323234	0.252075	0.5477	0.225817	0.387149	0.283265		61.4	0.00401368	0.174938	0.238978	0.223355	0.504864	0.19943	0.361119	0.27167		61.4	0.863798	1.32003	1.46498	1.36281	1.17151	1.1642	1.0012	0.535401		61.4	1.15116	1.63597	1.50109	1.92878	1.36864	0.850332	0.255737	-0.0898894
61.6	0.183578	0.176446	0.175921	0.325657	0.256692	0.023164	0.304092	0.0753823			61.6	0.176581	0.0540092	0.324896	0.254338	0.551193	0.225123	0.396108	0.299652		61.6	0.00535348	0.177515	0.241488	0.22502	0.508697	0.197356	0.367351	0.269497		61.6	0.865657	1.32823	1.47276	1.36669	1.17693	1.16455	1.00214	0.539161		61.6	1.15542	1.64259	1.50946	1.93418	1.37399	0.85466	0.255669	-0.0889025
61.8	0.181506	0.179328	0.174175	0.330405	0.260577	0.0250874	0.303476	0.0773734			61.8	0.176611	0.055435	0.327762	0.256295	0.552757	0.22553	0.395579	0.304574		61.8	0.0104954	0.177598	0.243558	0.227179	0.513166	0.197008	0.370647	0.268236		61.8	0.870966	1.33545	1.47893	1.37449	1.1791	1.17291	1.00717	0.539357		61.8	1.16062	1.65168	1.5141	1.938	1.37769	0.860129	0.256883	-0.0871383
62	0.185653	0.184794	0.168904	0.334266	0.261422	0.0263373	0.30867	0.0763492			62	0.177014	0.0562405	0.330461	0.259458	0.553726	0.227218	0.395541	0.301908		62	0.017804	0.176885	0.245761	0.232361	0.516363	0.195456	0.365619	0.264773		62	0.880746	1.34155	1.48664	1.37864	1.18496	1.17496	1.00619	0.54281		62	1.16587	1.65815	1.52003	1.94263	1.38141	0.863818	0.258928	-0.0868288
62.2	0.187253	0.180112	0.162368	0.335918	0.26746	0.0274385	0.309903	0.0773708			62.2	0.179915	0.0569278	0.332032	0.262759	0.554654	0.228174	0.405693	0.290784		62.2	0.0300602	0.176296	0.249368	0.234562	0.520189	0.193006	0.371382	0.258798		62.2	0.883691	1.34482	1.49131	1.3822	1.18338	1.17616	1.00676	0.544882		62.2	1.17367	1.66395	1.52588	1.94909	1.38595	0.868718	0.260815	-0.085157
62.4	0.187911	0.184744	0.156047	0.339012	0.268213	0.0291067	0.311078	0.0779367			62.4	0.182437	0.0591463	0.333154	0.267462	0.558088	0.226301	0.4079	0.274099		62.4	0.0440945	0.179587	0.252636	0.238781	0.52243	0.19207	0.375149	0.255617		62.4	0.890004	1.35695	1.49731	1.38565	1.19521	1.18169	1.0147	0.54789		62.4	1.17627	1.6703	1.53288	1.95296	1.39098	0.872524	0.263992	-0.0850023
62.6	0.188351	0.189417	0.151697	0.34001	0.275742	0.02949	0.315157	0.0789802			62.6	0.18591	0.0620756	0.336235	0.267902	0.561477	0.231279	0.404481	0.276409		62.6	0.0600028	0.180484	0.253205	0.241611	0.52485	0.1919	0.369709	0.253705		62.6	0.896471	1.35707	1.50296	1.3909	1.19454	1.17892	1.01536	0.549075		62.6	1.18431	1.67781	1.53729	1.95794	1.39491	0.874359	0.268657	-0.0843233
62.8	0.18893	0.184254	0.148711	0.341675	0.27457	0.0306044	0.315633	0.0780044			62.8	0.188259	0.0629706	0.337884	0.271323	0.56544	0.23348	0.412082	0.294438		62.8	0.0730959	0.181192	0.256599	0.244862	0.527047	0.19398	0.371251	0.253271		62.8	0.901204	1.36225	1.50657	1.39779	1.19591	1.18423	1.01665	0.549954		62.8	1.18914	1.683	1.54466	1.96521	1.40006	0.877453	0.269214	-0.0868459
63	0.191956	0.190486	0.145809	0.341968	0.281679	0.0315346	0.315828	0.0790361			63	0.190623	0.0660853	0.339916	0.274609	0.571514	0.233559	0.419843	0.307088		63	0.0841829	0.182201	0.259246	0.249314	0.532386	0.194345	0.380753	0.254731		63	0.902899	1.36759	1.51019	1.40292	1.20326	1.18989	1.02179	0.550174		63	1.19444	1.68869	1.55279	1.971	1.40546	0.88116	0.271798	-0.0852883
63.2	0.194642	0.189425	0.144324	0.34526	0.282153	0.0307425	0.318117	0.0801295			63.2	0.189513	0.0683236	0.342194	0.276182	0.577099	0.234608	0.417971	0.306576		63.2	0.08843	0.183892	0.26183	0.252639	0.536717	0.194879	0.378524	0.257962		63.2	0.91057	1.378	1.51713	1.40556	1.20516	1.19145	1.01919	0.548074		63.2	1.20044	1.69539	1.55613	1.97509	1.40854	0.885081	0.27356	-0.0879343
63.4	0.195628	0.187314	0.142405	0.345701	0.284201	0.0325352	0.321044	0.0810063			63.4	0.18949	0.0683326	0.344878	0.277532	0.579996	0.236651	0.422112	0.303269		63.4	0.0883948	0.183683	0.26422	0.25702	0.541116	0.193494	0.377865	0.260617		63.4	0.915318	1.38237	1.51883	1.40624	1.20962	1.19227	1.02594	0.5508		63.4	1.20804	1.69995	1.56391	1.97992	1.41257	0.889991	0.273797	-0.0864801
63.6	0.196086	0.193936	0.143064	0.353389	0.288415	0.0345794	0.320859	0.082909			63.6	0.187875	0.0681336	0.345531	0.280212	0.581457	0.237093	0.43256	0.290797		63.6	0.0803229	0.186271	0.269257	0.260581	0.547304	0.192681	0.388175	0.263018		63.6	0.922918	1.38768	1.52517	1.41203	1.21092	1.19677	1.03094	0.557603		63.6	1.21186	1.70582	1.56902	1.98574	1.41548	0.895019	0.275023	-0.0875802
63.8	0.193562	0.194235	0.147118	0.355437	0.287456	0.0366111	0.32448	0.084924			63.8	0.187586	0.071278	0.347845	0.282633	0.585196	0.235927	0.433059	0.284368		63.8	0.0711229	0.190595	0.269973	0.266422	0.552553	0.191361	0.388763	0.264146		63.8	0.925853	1.39147	1.53031	1.41569	1.22085	1.19505	1.03073	0.557341		63.8	1.21887	1.71087	1.57489	1.98933	1.42022	0.898286	0.278169	-0.08431
64	0.193819	0.194906	0.156213	0.362328	0.292733	0.038047	0.324035	0.0856043			64	0.187081	0.0705617	0.348946	0.283647	0.589216	0.237991	0.433554	0.297128		64	0.0578435	0.192396	0.273267	0.268643	0.554412	0.193725	0.385657	0.264844		64	0.930484	1.39595	1.54164	1.42259	1.2169	1.20031	1.03053	0.555463		64	1.22554	1.7169	1.58044	1.99442	1.42323	0.903302	0.279229	-0.085867
64.2	0.192973	0.20269	0.167112	0.36549	0.292973	0.0391397	0.325549	0.0852076			64.2	0.188671	0.0724025	0.351815	0.285522	0.59185	0.23838	0.444974	0.314885		64.2	0.0445644	0.19744	0.27547	0.272053	0.557028	0.191364	0.393103	0.265983		64.2	0.936416	1.40282	1.53981	1.4222	1.21552	1.20273	1.03326	0.555526		64.2	1.23059	1.72391	1.58692	1.99999	1.42728	0.904086	0.281435	-0.0845328
64.4	0.193476	0.196835	0.180221	0.370421	0.299907	0.0402092	0.327844	0.0859739			64.4	0.189692	0.0750934	0.353398	0.287015	0.597408	0.242806	0.448604	0.322639		64.4	0.0334408	0.200108	0.278642	0.275688	0.558603	0.193163	0.398675	0.265555		64.4	0.939524	1.40694	1.54692	1.43215	1.22088	1.21043	1.03654	0.561721		64.4	1.23723	1.73024	1.59107	2.00525	1.43091	0.905985	0.282613	-0.083848
64.6	0.19354	0.200416	0.194082	0.369116	0.301119	0.0386963	0.332511	0.0844467			64.6	0.190813	0.0778117	0.356052	0.2888	0.602522	0.245621	0.4472	0.318457		64.6	0.0286174	0.202559	0.279633	0.278452	0.559802	0.192049	0.394367	0.266582		64.6	0.941596	1.41419	1.55052	1.43059	1.23035	1.20705	1.03555	0.557888		64.6	1.24295	1.73461	1.59729	2.0092	1.43318	0.907042	0.284001	-0.0807578
64.8	0.197615	0.205103	0.202967	0.373184	0.306442	0.0397736	0.336899	0.0841797			64.8	0.193188	0.0780908	0.358118	0.29082	0.605478	0.246913	0.455401	0.307173		64.8	0.0260092	0.199603	0.283287	0.283145	0.560861	0.189458	0.399148	0.267865		64.8	0.943527	1.41705	1.55473	1.43268	1.23072	1.21552	1.03843	0.565666		64.8	1.2476	1.74139	1.60206	2.01491	1.43815	0.910359	0.282501	-0.0829776
65	0.197469	0.198485	0.207647	0.37512	0.309568	0.0399371	0.340213	0.0848641			65	0.194974	0.0808134	0.360726	0.293263	0.608964	0.250493	0.46149	0.291421		65	0.0306179	0.205574	0.285086	0.287985	0.565992	0.186205	0.406014	0.268159		65	0.953025	1.42413	1.55583	1.4387	1.2354	1.21211	1.03814	0.565048		65	1.25138	1.74628	1.60593	2.01789	1.44029	0.911375	0.284323	-0.0812208
65.2	0.19813	0.202677	0.208581	0.377751	0.310528	0.0433565	0.344275	0.0871619			65.2	0.194276	0.0822061	0.363114	0.296057	0.615016	0.254856	0.4591	0.29389		65.2	0.042528	0.205705	0.288886	0.29089	0.571088	0.188162	0.403137	0.268128		65.2	0.959351	1.42735	1.56423	1.44633	1.23347	1.21544	1.0392	0.567139		65.2	1.25532	1.74916	1.61219	2.02023	1.44426	0.915265	0.286817	-0.0811285
65.4	0.201049	0.208653	0.204631	0.385035	0.316499	0.0449483	0.346586	0.0868916			65.4	0.194784	0.0836966	0.365273	0.298725	0.618641	0.255357	0.466474	0.310488		65.4	0.0562587	0.209081	0.291538	0.296771	0.575026	0.184907	0.40387	0.270029		65.4	0.962183	1.43379	1.56388	1.44603	1.2376	1.21826	1.04586	0.563035		65.4	1.25787	1.75593	1.61721	2.02476	1.44669	0.918038	0.289353	-0.0830425
65.6	0.202785	0.199184	0.196428	0.391637	0.315852	0.0485883	0.347773	0.0885306			65.6	0.195488	0.0856473	0.367954	0.302183	0.623439	0.254546	0.473755	0.324628		65.6	0.072418	0.21165	0.295225	0.29998	0.576524	0.183638	0.411671	0.269506		65.6	0.970514	1.43729	1.56961	1.44872	1.23528	1.22545	1.04648	0.569506		65.6	1.26418	1.76229	1.62076	2.02789	1.45096	0.922479	0.291266	-0.0832672
65.8	0.203329	0.206655	0.188985	0.396233	0.32236	0.0500374	0.350562	0.0886581			65.8	0.194984	0.0871551	0.369929	0.303307	0.629585	0.260038	0.470485	0.324445		65.8	0.086789	0.218222	0.299354	0.302708	0.579779	0.183194	0.41268	0.272526		65.8	0.972528	1.43988	1.57425	1.45418	1.2432	1.22812	1.05013	0.564939		65.8	1.26752	1.76635	1.62425	2.03024	1.45105	0.925305	0.295996	-0.0814117
66	0.203437	0.210285	0.18185	0.40177	0.322426	0.0516448	0.355699	0.0895865			66	0.194947	0.087289	0.372566	0.307321	0.634139	0.261085	0.47488	0.320071		66	0.0987465	0.220782	0.303687	0.30775	0.582425	0.183194	0.411475	0.275728		66	0.974509	1.44782	1.58068	1.45229	1.24949	1.22793	1.04722	0.573557		66	1.2738	1.77161	1.63017	2.03531	1.45607	0.927385	0.296834	-0.0817203
66.2	0.206333	0.205381	0.177846	0.407938	0.329449	0.0517722	0.355443	0.0900014			66.2	0.196547	0.0881272	0.375094	0.310487	0.639332	0.261349	0.484348	0.306285		66.2	0.101902	0.223958	0.306212	0.312404	0.583917	0.182314	0.418982	0.278418		66.2	0.981145	1.451	1.58566	1.46351	1.2479	1.22895	1.05313	0.570813		66.2	1.27865	1.77894	1.63385	2.03986	1.45873	0.929925	0.296967	-0.0828764
66.4	0.202677	0.212012	0.17679	0.408986	0.33071	0.0530944	0.358135	0.089633			66.4	0.199452	0.088533	0.378395	0.315248	0.644087	0.259595	0.483091	0.2997		66.4	0.0993184	0.221853	0.309031	0.315074	0.58844	0.182874	0.42225	0.281208		66.4	0.989979	1.45725	1.58853	1.46573	1.24711	1.22677	1.05751	0.5741		66.4	1.28646	1.78283	1.63696	2.0438	1.46219	0.933235	0.297276	-0.0808237
66.6	0.202462	0.21797	0.182548	0.411659	0.334896	0.0521505	0.362546	0.0900663			66.6	0.201237	0.0900909	0.37945	0.318905	0.649727	0.259059	0.48682	0.310687		66.6	0.0874196	0.224357	0.311526	0.320636	0.595971	0.183631	0.420785	0.28278		66.6	0.991731	1.46482	1.59159	1.47391	1.25278	1.23275	1.05674	0.573661		66.6	1.2892	1.78735	1.64318	2.04877	1.46588	0.935767	0.298952	-0.0797663
66.8	0.203893	0.20931	0.191733	0.414227	0.338354	0.0529811	0.361768	0.0902035			66.8	0.202523	0.092181	0.381983	0.323929	0.654895	0.259478	0.498332	0.327527		66.8	0.0743196	0.22642	0.313617	0.325673	0.604364	0.182499	0.423628	0.282696		66.8	0.993508	1.46515	1.60384	1.46796	1.25638	1.23242	1.05751	0.579199		66.8	1.29391	1.79411	1.6511	2.05327	1.47087	0.938256	0.300315	-0.080324
67	0.201486	0.217459	0.202418	0.413726	0.338299	0.0552281	0.360772	0.0895804			67	0.204365	0.096971	0.3838	0.327722	0.659368	0.260988	0.49834	0.333175		67	0.0586934	0.225996	0.315707	0.327703	0.609108	0.181558	0.429814	0.287188		67	1.00129	1.46947	1.60544	1.47423	1.25634	1.23595	1.05872	0.574196		67	1.29876	1.79675	1.65418	2.05702	1.47484	0.942108	0.301251	-0.0816376
67.2	0.198088	0.220536	0.218076	0.417738	0.345506	0.0565613	0.362756	0.0903033			67.2	0.204771	0.0983295	0.384906	0.333351	0.662453	0.261911	0.499671	0.329907		67.2	0.0480531	0.225201	0.319456	0.333551	0.613528	0.179086	0.429241	0.288074		67.2	1.00651	1.47703	1.60733	1.47433	1.25999	1.23691	1.05958	0.579078		67.2	1.30488	1.79963	1.65968	2.05994	1.4782	0.945437	0.301983	-0.0794787
67.4	0.198717	0.213027	0.229594	0.418269	0.343921	0.059086	0.36243	0.0919377			67.4	0.204173	0.100136	0.387958	0.336854	0.666541	0.267416	0.509421	0.318696		67.4	0.0438329	0.230888	0.323528	0.337225	0.618414	0.177613	0.429559	0.286608		67.4	1.00544	1.47905	1.61	1.48167	1.26283	1.24127	1.05946	0.579691		67.4	1.30702	1.80671	1.66403	2.06307	1.4816	0.948135	0.303465	-0.0819659
67.6	0.200615	0.221236	0.233942	0.422043	0.351494	0.0606098	0.362376	0.0923915			67.6	0.205373	0.101983	0.391245	0.341476	0.669919	0.272094	0.510864	0.310814		67.6	0.0492346	0.228437	0.326085	0.340328	0.623121	0.175652	0.436382	0.286519		67.6	1.01318	1.48653	1.61431	1.48322	1.26358	1.24299	1.06152	0.584083		67.6	1.31138	1.81093	1.66864	2.06619	1.4842	0.949997	0.303188	-0.0837891
67.8	0.203383	0.224844	0.235011	0.420338	0.351278	0.0617508	0.366152	0.0932725			67.8	0.206188	0.104387	0.392423	0.346591	0.673585	0.273265	0.513914	0.318525		67.8	0.0602539	0.229525	0.329165	0.34384	0.627072	0.175892	0.43642	0.284928		67.8	1.01883	1.48435	1.61719	1.48648	1.26675	1.24344	1.06432	0.581288		67.8	1.31862	1.81421	1.67029	2.06878	1.48496	0.953296	0.305057	-0.0837935
68	0.208172	0.217613	0.232521	0.426147	0.360102	0.0635425	0.369707	0.0948329			68	0.207438	0.10418	0.395751	0.350112	0.678528	0.274608	0.523629	0.327205		68	0.0782871	0.232875	0.331335	0.349699	0.631399	0.171796	0.432837	0.281486		68	1.02767	1.48874	1.61868	1.49164	1.26721	1.2474	1.0632	0.580804		68	1.32191	1.82111	1.67703	2.07216	1.48661	0.955222	0.307281	-0.0812821
68.2	0.212269	0.225606	0.224086	0.425046	0.358501	0.0636656	0.376272	0.0934882			68.2	0.210844	0.107609	0.400138	0.354123	0.682989	0.276639	0.526341	0.332609		68.2	0.0972245	0.238519	0.331612	0.353784	0.635983	0.169436	0.438613	0.280364		68.2	1.02483	1.49397	1.62466	1.4947	1.27119	1.24735	1.06242	0.583834		68.2	1.32483	1.82589	1.67965	2.07778	1.48836	0.957592	0.306698	-0.0837593
68.4	0.219796	0.230036	0.215751	0.426907	0.363686	0.063382	0.382158	0.0936421			68.4	0.212637	0.110027	0.402244	0.357441	0.687338	0.27841	0.530192	0.330097		68.4	0.109789	0.240154	0.332647	0.358001	0.641465	0.166763	0.443633	0.276393		68.4	1.03107	1.50118	1.62789	1.49509	1.27455	1.24907	1.06588	0.588329		68.4	1.33007	1.82994	1.68502	2.08134	1.49152	0.959727	0.307999	-0.0813353
68.6	0.22376	0.223309	0.212293	0.429808	0.366591	0.0652096	0.385164	0.0921758			68.6	0.213266	0.111864	0.405372	0.361826	0.691841	0.276403	0.538901	0.321875		68.6	0.112464	0.244322	0.337044	0.36514	0.645172	0.163581	0.438658	0.274529		68.6	1.03284	1.50426	1.63489	1.4953	1.27587	1.24991	1.06827	0.585214		68.6	1.33584	1.8335	1.69099	2.0844	1.49411	0.962778	0.310064	-0.07973
68.8	0.228321	0.231905	0.210168	0.436039	0.369636	0.0666063	0.38848	0.0936496			68.8	0.21442	0.11366	0.410048	0.364286	0.695219	0.280393	0.538715	0.313229		68.8	0.106279	0.242999	0.340584	0.36858	0.648535	0.161145	0.441913	0.27542		68.8	1.03879	1.50681	1.63841	1.49813	1.27876	1.25163	1.07187	0.584179		68.8	1.34156	1.83978	1.69555	2.08817	1.49808	0.964399	0.310546	-0.0786401
69	0.228084	0.234278	0.211311	0.438952	0.37574	0.0671213	0.390673	0.0940717			69	0.214464	0.115149	0.413917	0.367836	0.698966	0.283401	0.542157	0.323216		69	0.0925623	0.24577	0.345227	0.370608	0.652471	0.159971	0.451586	0.27791		69	1.04183	1.5152	1.64002	1.50105	1.2791	1.25588	1.06986	0.587529		69	1.34623	1.84426	1.69749	2.09006	1.49924	0.968112	0.314045	-0.0794513
69.2	0.23254	0.22665	0.216812	0.443265	0.376431	0.0695444	0.387987	0.0968073			69.2	0.212816	0.116527	0.415476	0.37068	0.702705	0.28613	0.551319	0.336504		69.2	0.0752158	0.247319	0.349782	0.378947	0.655864	0.157574	0.448531	0.27848		69.2	1.05058	1.51532	1.64021	1.50168	1.27851	1.25516	1.07337	0.591488		69.2	1.35172	1.84983	1.70352	2.09231	1.50231	0.970316	0.317094	-0.0770008
69.4	0.232623	0.235445	0.228139	0.4497	0.384819	0.072299	0.389165	0.0979384			69.4	0.213169	0.118643	0.41724	0.374873	0.708357	0.28694	0.549091	0.345676		69.4	0.0613627	0.249367	0.353652	0.379001	0.659613	0.155817	0.448108	0.281268		69.4	1.05077	1.52222	1.64601	1.50837	1.28423	1.2582	1.07406	0.586727		69.4	1.35651	1.85256	1.70928	2.09592	1.50444	0.972401	0.318144	-0.0766123
69.6	0.235235	0.236984	0.241216	0.449882	0.384185	0.0743352	0.394285	0.0998066			69.6	0.214062	0.119828	0.419679	0.377255	0.712232	0.292851	0.553998	0.343166		69.6	0.0574807	0.252957	0.356416	0.385568	0.662414	0.154448	0.458171	0.282843		69.6	1.05511	1.52623	1.64592	1.50817	1.28618	1.2576	1.07203	0.591411		69.6	1.36123	1.85587	1.71602	2.09875	1.50743	0.975466	0.318362	-0.0774704
69.8	0.231298	0.231891	0.253001	0.451308	0.390738	0.0755773	0.396261	0.0984036			69.8	0.215592	0.119168	0.421997	0.382789	0.717387	0.29303	0.561864	0.333671		69.8	0.0620642	0.255971	0.357837	0.391596	0.665655	0.152456	0.463686	0.284405		69.8	1.06517	1.52889	1.65157	1.50691	1.2857	1.26037	1.07514	0.590734		69.8	1.36381	1.85961	1.72213	2.10159	1.50945	0.978235	0.318715	-0.0771793
70	0.236715	0.240581	0.26073	0.453332	0.390411	0.0760983	0.400637	0.0989702			70	0.217513	0.122136	0.422794	0.386965	0.721265	0.294825	0.562889	0.326807		70	0.0757804	0.251321	0.35973	0.395015	0.670069	0.152416	0.460522	0.286852		70	1.06568	1.52881	1.65906	1.51624	1.28667	1.26448	1.07601	0.591484		70	1.3684	1.86272	1.72777	2.10567	1.51429	0.979225	0.317525	-0.0766161
70.2	0.236053	0.244611	0.262989	0.457939	0.396096	0.0781473	0.402646	0.0973752			70.2	0.219982	0.123444	0.426948	0.392696	0.724768	0.296187	0.569677	0.335083		70.2	0.0947904	0.250579	0.363953	0.400444	0.676164	0.152466	0.465219	0.289725		70.2	1.0712	1.53715	1.65877	1.51591	1.28799	1.26695	1.08282	0.592252		70.2	1.37271	1.8665	1.73107	2.10769	1.51731	0.982522	0.317022	-0.0764119
70.4	0.233949	0.236671	0.259044	0.459945	0.399684	0.0779223	0.405811	0.0980303			70.4	0.219694	0.125517	0.430838	0.396394	0.727706	0.296058	0.578922	0.347954		70.4	0.111576	0.250883	0.368502	0.405298	0.68054	0.153011	0.47195	0.293394		70.4	1.07428	1.54206	1.65815	1.52246	1.28534	1.26831	1.07835	0.598769		70.4	1.37783	1.87043	1.73347	2.10944	1.52102	0.985204	0.319107	-0.075276
70.6	0.234011	0.246479	0.250958	0.468428	0.403605	0.0796626	0.402639	0.0983106			70.6	0.220401	0.126962	0.431869	0.401153	0.732193	0.29915	0.57932	0.354431		70.6	0.118387	0.249891	0.371569	0.407824	0.685697	0.154406	0.47128	0.28998		70.6	1.07811	1.54146	1.666	1.52442	1.29545	1.27027	1.08175	0.597118		70.6	1.38308	1.8745	1.73258	2.11107	1.52233	0.985459	0.321861	-0.0746492
70.8	0.242973	0.250287	0.243798	0.473879	0.409955	0.0825766	0.407336	0.0998264			70.8	0.219717	0.129965	0.433979	0.402282	0.736983	0.303121	0.58558	0.354364		70.8	0.114334	0.252059	0.377536	0.41064	0.68988	0.154441	0.471857	0.28495		70.8	1.08455	1.54733	1.67007	1.52217	1.2939	1.27048	1.08584	0.59802		70.8	1.38653	1.87619	1.73502	2.11466	1.52522	0.986655	0.323794	-0.0753484
71	0.246268	0.24303	0.239557	0.477838	0.409891	0.0842778	0.408786	0.100135			71	0.220718	0.133052	0.437848	0.40601	0.742909	0.305273	0.593537	0.344879		71	0.1017	0.259571	0.380734	0.412931	0.695264	0.155927	0.480156	0.279276		71	1.08862	1.55054	1.6683	1.52601	1.30364	1.27122	1.08439	0.602033		71	1.39077	1.88139	1.73932	2.11739	1.52566	0.989305	0.323321	-0.0749017
71.2	0.245355	0.250086	0.239133	0.481102	0.418376	0.0871617	0.411743	0.101959			71.2	0.222807	0.135163	0.439026	0.408744	0.747967	0.306195	0.592383	0.338115		71.2	0.0839961	0.26454	0.384135	0.422545	0.699917	0.155719	0.484631	0.281331		71.2	1.09382	1.55637	1.66876	1.53091	1.29763	1.27261	1.08311	0.59968		71.2	1.3951	1.88456	1.74387	2.12001	1.52803	0.990331	0.325982	-0.0751456
71.4	0.250963	0.257974	0.2472	0.485296	0.416624	0.087138	0.412353	0.101636			71.4	0.226695	0.13796	0.441472	0.413638	0.753692	0.311953	0.601524	0.345213		71.4	0.0710445	0.265189	0.386726	0.425853	0.703879	0.15713	0.483896	0.280448		71.4	1.09674	1.55698	1.67597	1.53352	1.30202	1.27368	1.08394	0.599083		71.4	1.39789	1.8903	1.74853	2.12348	1.52835	0.991676	0.326353	-0.0754106
71.6	0.2535	0.248826	0.258582	0.488429	0.42584	0.0899872	0.419556	0.102806			71.6	0.227565	0.140336	0.445608	0.416699	0.75941	0.310585	0.60594	0.354781		71.6	0.0669849	0.271143	0.389774	0.431405	0.709109	0.159477	0.488448	0.284095		71.6	1.10106	1.55937	1.67609	1.53591	1.30049	1.27571	1.08653	0.600837		71.6	1.40181	1.8957	1.75337	2.12711	1.5329	0.995054	0.327326	-0.0756132
71.8	0.249759	0.255021	0.272418	0.490964	0.422772	0.0901918	0.415987	0.103245			71.8	0.230973	0.142294	0.447831	0.422887	0.763659	0.31059	0.607118	0.355171		71.8	0.0762822	0.275554	0.392171	0.440982	0.712744	0.160822	0.492173	0.287598		71.8	1.10203	1.55932	1.68352	1.53382	1.30357	1.27795	1.09022	0.600401		71.8	1.40676	1.90003	1.75912	2.12794	1.53409	0.996434	0.328191	-0.0743485
72	0.246191	0.26504	0.285182	0.494234	0.432165	0.0915901	0.419937	0.103513			72	0.229275	0.143101	0.449726	0.427204	0.765609	0.311387	0.612611	0.352567		72	0.0929028	0.275212	0.395999	0.442506	0.716549	0.161824	0.488196	0.290206		72	1.10133	1.56468	1.68341	1.53934	1.30818	1.27507	1.09334	0.601146		72	1.41148	1.90029	1.7602	2.13061	1.53647	0.999562	0.330554	-0.0760852
72.2	0.24831	0.256356	0.29403	0.496876	0.431959	0.0943941	0.427249	0.103556			72.2	0.228653	0.145556	0.451344	0.432493	0.771324	0.315786	0.620181	0.342927		72.2	0.113546	0.274539	0.398637	0.445951	0.722351	0.164976	0.492546	0.288889		72.2	1.11031	1.56893	1.68658	1.5377	1.30846	1.27848	1.09306	0.605138		72.2	1.41577	1.90547	1.76272	2.13301	1.54016	1.00263	0.330581	-0.0760704
72.4	0.2481	0.257844	0.292321	0.50112	0.439878	0.0953181	0.432361	0.105511			72.4	0.226692	0.147446	0.453858	0.434126	0.776149	0.315497	0.61883	0.334957		72.4	0.126566	0.279706	0.402672	0.452837	0.727917	0.165156	0.498827	0.292671		72.4	1.11463	1.57029	1.69055	1.54212	1.30917	1.28124	1.09148	0.604517		72.4	1.42216	1.90875	1.7652	2.13495	1.54237	1.0047	0.332972	-0.0759934
72.6	0.247124	0.268942	0.28648	0.502987	0.441011	0.0963064	0.434238	0.106196			72.6	0.229492	0.149444	0.457039	0.437326	0.780446	0.321274	0.630925	0.344862		72.6	0.130162	0.280324	0.407453	0.454945	0.731092	0.165075	0.496746	0.298652		72.6	1.11919	1.5719	1.69579	1.54402	1.31376	1.2788	1.09166	0.605009		72.6	1.42503	1.91341	1.76715	2.1382	1.54316	1.00736	0.331781	-0.0742895
72.8	0.250815	0.260548	0.277219	0.509765	0.446844	0.0962678	0.438815	0.106004			72.8	0.229989	0.152737	0.460631	0.439935	0.786541	0.324865	0.633404	0.360948		72.8	0.122235	0.279735	0.411851	0.461961	0.738023	0.16698	0.494372	0.303907		72.8	1.12247	1.57589	1.6968	1.54658	1.31418	1.28021	1.09516	0.604924		72.8	1.4302	1.91591	1.76745	2.1421	1.54621	1.01022	0.33388	-0.0730631
73	0.252865	0.258593	0.27003	0.510328	0.449629	0.0983402	0.439999	0.106594			73	0.233525	0.153799	0.463496	0.4421	0.793653	0.324432	0.63719	0.367688		73	0.108382	0.280819	0.414214	0.46783	0.74341	0.167484	0.502632	0.306073		73	1.12741	1.58481	1.69576	1.5502	1.31385	1.28603	1.09745	0.608569		73	1.43131	1.92258	1.77338	2.14453	1.55016	1.01075	0.335212	-0.0704248
73.2	0.256683	0.270165	0.268146	0.514578	0.452533	0.0980467	0.43722	0.106808			73.2	0.234183	0.154283	0.46773	0.445088	0.79946	0.323438	0.646305	0.364476		73.2	0.0914015	0.283614	0.418134	0.472132	0.748732	0.167458	0.503724	0.309471		73.2	1.13189	1.58337	1.70127	1.5561	1.31144	1.28388	1.09552	0.604604		73.2	1.43445	1.92546	1.77633	2.14817	1.55031	1.01049	0.337217	-0.0689223
73.4	0.258071	0.267592	0.274547	0.516679	0.45883	0.10012	0.43753	0.106464			73.4	0.235072	0.155805	0.471164	0.450322	0.804819	0.326145	0.648731	0.354045		73.4	0.0815916	0.286794	0.421873	0.480155	0.753855	0.169813	0.499489	0.311274		73.4	1.13756	1.58851	1.70106	1.54898	1.31491	1.28256	1.0938	0.609269		73.4	1.43692	1.92782	1.78054	2.14954	1.55449	1.0126	0.339226	-0.0685152
73.6	0.258814	0.264124	0.285918	0.52191	0.458285	0.10089	0.438526	0.106494			73.6	0.232325	0.157277	0.472534	0.455746	0.811548	0.326923	0.648614	0.345487		73.6	0.082186	0.289733	0.424197	0.480512	0.760539	0.170483	0.505829	0.311491		73.6	1.13443	1.59021	1.70401	1.55233	1.3152	1.28971	1.09768	0.60409		73.6	1.44112	1.9316	1.78479	2.15199	1.55765	1.01388	0.342064	-0.0692485
73.8	0.257213	0.275973	0.301276	0.52558	0.466229	0.104808	0.445262	0.10628			73.8	0.232235	0.159699	0.474843	0.459569	0.81624	0.328607	0.658655	0.35349		73.8	0.0926425	0.295088	0.428468	0.485188	0.764971	0.171656	0.515164	0.311178		73.8	1.14113	1.59194	1.71013	1.55763	1.32015	1.28797	1.09651	0.611885		73.8	1.44317	1.93642	1.79045	2.15464	1.55905	1.01518	0.338717	-0.0695064
74	0.259063	0.276548	0.309229	0.531381	0.465798	0.107345	0.446575	0.106873			74	0.232496	0.162993	0.477583	0.464599	0.819349	0.334281	0.658986	0.366346		74	0.108934	0.301058	0.434944	0.488889	0.769564	0.173036	0.51538	0.311881		74	1.14548	1.59709	1.70999	1.55505	1.32134	1.29017	1.09912	0.610564		74	1.44738	1.94023	1.79143	2.15863	1.55964	1.01667	0.340068	-0.0694888
74.2	0.257176	0.27209	0.314015	0.535507	0.474596	0.108951	0.454078	0.107385			74.2	0.234536	0.166786	0.480807	0.467964	0.820618	0.339793	0.663353	0.371595		74.2	0.1281	0.306128	0.438984	0.487918	0.773663	0.175133	0.514597	0.309801		74.2	1.14768	1.60104	1.71025	1.55886	1.32179	1.28695	1.09988	0.609558		74.2	1.45206	1.94222	1.79593	2.15932	1.5617	1.01955	0.34087	-0.0696931
74.4	0.257249	0.281002	0.311194	0.539951	0.473782	0.111604	0.458047	0.108264			74.4	0.235815	0.170232	0.483166	0.470942	0.822677	0.340753	0.675435	0.370245		74.4	0.136839	0.306755	0.444071	0.498257	0.778344	0.17554	0.523437	0.308523		74.4	1.15181	1.60623	1.71074	1.55974	1.31945	1.28983	1.10319	0.613399		74.4	1.45631	1.94624	1.79646	2.16198	1.56234	1.02001	0.339785	-0.0694861
74.6	0.259972	0.284657	0.304669	0.54232	0.483173	0.114131	0.458599	0.110049			74.6	0.237243	0.173961	0.487186	0.473309	0.825824	0.340861	0.677552	0.363458		74.6	0.136214	0.307703	0.44775	0.501782	0.78404	0.177377	0.528398	0.309442		74.6	1.15235	1.60488	1.71744	1.56577	1.32359	1.29439	1.1011	0.614845		74.6	1.4593	1.9492	1.80022	2.16356	1.56332	1.02061	0.340674	-0.0693856
74.8	0.264217	0.275434	0.297805	0.545368	0.483807	0.113501	0.455279	0.113361			74.8	0.238343	0.174564	0.489686	0.477477	0.82914	0.345127	0.684011	0.359157		74.8	0.125819	0.309845	0.45102	0.507968	0.788919	0.179231	0.528464	0.312479		74.8	1.15665	1.60723	1.71704	1.56606	1.32357	1.2929	1.1035	0.615769		74.8	1.46252	1.95087	1.80089	2.16531	1.566	1.02208	0.346306	-0.0709753
75	0.268907	0.283144	0.299357	0.553336	0.491956	0.114348	0.458461	0.114898			75	0.238415	0.176133	0.493448	0.481009	0.835416	0.346394	0.693019	0.364978		75	0.111278	0.307423	0.453604	0.519597	0.794883	0.181101	0.530358	0.31124		75	1.1605	1.61172	1.72293	1.56427	1.32648	1.29554	1.09969	0.612297		75	1.46753	1.9549	1.8042	2.16566	1.56706	1.0229	0.347412	-0.0721143
75.2	0.271459	0.287128	0.308711	0.558772	0.491885	0.114392	0.459435	0.115295			75.2	0.239513	0.178204	0.494946	0.484978	0.843008	0.347059	0.692913	0.373525		75.2	0.0969864	0.306462	0.455533	0.525902	0.798569	0.18282	0.538291	0.311549		75.2	1.16308	1.61854	1.7262	1.56655	1.32675	1.29024	1.10487	0.613645		75.2	1.46947	1.95811	1.80709	2.16935	1.56975	1.02496	0.348448	-0.071958
75.4	0.277748	0.28021	0.323283	0.563492	0.500028	0.115025	0.462585	0.116092			75.4	0.24224	0.17863	0.499512	0.488743	0.850154	0.350888	0.698523	0.376016		75.4	0.0971048	0.310008	0.457479	0.532157	0.80271	0.185074	0.540515	0.30864		75.4	1.16802	1.61784	1.72263	1.56605	1.32982	1.29307	1.10356	0.616215		75.4	1.47155	1.96057	1.81209	2.17377	1.57096	1.02591	0.349436	-0.072865
75.6	0.280361	0.283969	0.335107	0.567251	0.502106	0.114981	0.470909	0.116157			75.6	0.245176	0.179737	0.501632	0.49121	0.855789	0.354664	0.707463	0.374046		75.6	0.108415	0.31215	0.462155	0.5402	0.807989	0.186019	0.539224	0.306329		75.6	1.17166	1.61983	1.72866	1.56995	1.33069	1.29408	1.10327	0.617836		75.6	1.47565	1.9617	1.81209	2.17531	1.57266	1.02766	0.351654	-0.0735027
75.8	0.276082	0.293225	0.339363	0.569706	0.506508	0.116774	0.473114	0.116627			75.8	0.247522	0.182579	0.506671	0.493631	0.861694	0.358623	0.707542	0.370163		75.8	0.126551	0.316457	0.465407	0.542404	0.812755	0.18701	0.541861	0.303422		75.8	1.17959	1.62028	1.72774	1.57347	1.32801	1.29509	1.1066	0.614675		75.8	1.48006	1.96627	1.81514	2.17547	1.57583	1.02881	0.349783	-0.0734331
76	0.27375	0.28524	0.33911	0.571123	0.510454	0.119867	0.480383	0.116223			76	0.248035	0.183883	0.509613	0.497591	0.865098	0.360671	0.717666	0.372126		76	0.137907	0.322634	0.469022	0.549485	0.817573	0.186766	0.54929	0.306001		76	1.17888	1.62653	1.73255	1.57944	1.33144	1.30145	1.10806	0.616737		76	1.48537	1.96833	1.81751	2.17752	1.57858	1.03121	0.35134	-0.0749865
76.2	0.272942	0.289521	0.332691	0.574449	0.513783	0.121279	0.485133	0.117531			76.2	0.24922	0.185017	0.513782	0.501893	0.868296	0.363198	0.724637	0.379005		76.2	0.142879	0.322226	0.475157	0.553647	0.822747	0.189136	0.550798	0.308245		76.2	1.18171	1.62694	1.73009	1.57944	1.33295	1.30046	1.10487	0.61558		76.2	1.48932	1.97188	1.82002	2.1788	1.57924	1.03223	0.352706	-0.0741302
76.4	0.269689	0.299529	0.324451	0.577606	0.52025	0.125564	0.488508	0.117278			76.4	0.249234	0.18751	0.51648	0.506619	0.870609	0.368926	0.725588	0.381927		76.4	0.134904	0.321284	0.479824	0.557759	0.829432	0.189772	0.551446	0.310047		76.4	1.18462	1.63287	1.73799	1.5779	1.3331	1.29794	1.10898	0.618501		76.4	1.49315	1.97375	1.82077	2.17783	1.58116	1.03537	0.352394	-0.0754304
76.6	0.268848	0.294183	0.322857	0.58162	0.522333	0.126045	0.48868	0.117451			76.6	0.250205	0.189377	0.521698	0.512501	0.874353	0.372245	0.734176	0.381844		76.6	0.121078	0.319699	0.482242	0.567233	0.834862	0.19173	0.557507	0.308869		76.6	1.18848	1.63224	1.73723	1.57914	1.33746	1.29995	1.10639	0.619996		76.6	1.49546	1.97761	1.82466	2.1802	1.58289	1.03634	0.352399	-0.0743006
76.8	0.272068	0.294629	0.330865	0.587954	0.52916	0.12848	0.490827	0.1173			76.8	0.251534	0.19009	0.523884	0.517007	0.877584	0.371781	0.739547	0.376855		76.8	0.111394	0.317726	0.487404	0.567607	0.84262	0.192351	0.562507	0.308547		76.8	1.18904	1.63099	1.73887	1.58275	1.33971	1.30024	1.10856	0.62167		76.8	1.49811	1.9788	1.83023	2.1828	1.5827	1.0382	0.355101	-0.0717805
77	0.271587	0.305519	0.344183	0.59641	0.529095	0.1282	0.487069	0.118695			77	0.2553	0.192338	0.527269	0.520981	0.88408	0.372635	0.741599	0.376231		77	0.11388	0.320823	0.491042	0.574158	0.849075	0.194514	0.561119	0.308024		77	1.19556	1.64227	1.74209	1.58535	1.33785	1.30227	1.11292	0.616875		77	1.49842	1.98056	1.83274	2.18441	1.58282	1.03951	0.355481	-0.0679135
77.2	0.273986	0.302016	0.357256	0.602119	0.536771	0.131075	0.489284	0.119803			77.2	0.255094	0.196021	0.529945	0.525975	0.891464	0.377761	0.750691	0.380359		77.2	0.125533	0.327527	0.494138	0.582813	0.855086	0.195704	0.563918	0.309037		77.2	1.19753	1.6385	1.74028	1.58338	1.3365	1.30107	1.11317	0.627059		77.2	1.50146	1.98314	1.83517	2.18528	1.58566	1.03999	0.354709	-0.0692342
77.4	0.273972	0.29725	0.366215	0.607676	0.535756	0.131084	0.489002	0.120662			77.4	0.256077	0.197382	0.533108	0.529388	0.897866	0.377382	0.75332	0.387022		77.4	0.144145	0.330743	0.499254	0.585477	0.860848	0.197396	0.568483	0.310158		77.4	1.19871	1.64177	1.74607	1.58323	1.33785	1.30024	1.11817	0.620656		77.4	1.50393	1.9879	1.83735	2.18738	1.58755	1.04119	0.356395	-0.0690919
77.6	0.27441	0.308972	0.365919	0.614495	0.545396	0.13345	0.490977	0.121045			77.6	0.257549	0.19933	0.534017	0.534625	0.903627	0.379493	0.75796	0.388107		77.6	0.153828	0.335135	0.503224	0.593309	0.863887	0.199138	0.570023	0.311764		77.6	1.20233	1.64543	1.7465	1.58491	1.34255	1.30457	1.11625	0.621298		77.6	1.50816	1.98913	1.84061	2.18819	1.58836	1.04245	0.355728	-0.0677559
77.8	0.273883	0.309288	0.360221	0.62019	0.545462	0.134855	0.497797	0.121375			77.8	0.257796	0.203573	0.537263	0.540696	0.909887	0.382376	0.766457	0.386729		77.8	0.151836	0.341225	0.506434	0.599664	0.86791	0.201468	0.568136	0.312241		77.8	1.20916	1.64595	1.75326	1.58701	1.34393	1.3056	1.1134	0.622278		77.8	1.51092	1.9939	1.84119	2.19094	1.59087	1.04345	0.355487	-0.0698015
78	0.27688	0.303197	0.353562	0.619702	0.557005	0.135924	0.503942	0.121776			78	0.258453	0.206151	0.540579	0.545148	0.914285	0.388197	0.768985	0.382053		78	0.142511	0.342163	0.512327	0.601458	0.873036	0.203495	0.569762	0.311667		78	1.2147	1.65176	1.74832	1.59038	1.34134	1.30069	1.11438	0.622943		78	1.51533	1.99615	1.84413	2.19281	1.59291	1.04471	0.355075	-0.071121
78.2	0.278529	0.311572	0.350162	0.624039	0.556972	0.137068	0.503961	0.121916			78.2	0.26085	0.209239	0.54386	0.55094	0.919653	0.387687	0.777049	0.384387		78.2	0.129125	0.343264	0.517091	0.610349	0.877006	0.204934	0.576864	0.31089		78.2	1.21294	1.65091	1.75906	1.59088	1.34239	1.30226	1.11316	0.622959		78.2	1.51753	1.99905	1.84649	2.1963	1.59463	1.04586	0.356124	-0.0691051
78.4	0.283275	0.319038	0.357474	0.627254	0.566218	0.138436	0.506371	0.12304			78.4	0.261605	0.212965	0.546797	0.556922	0.924041	0.388499	0.786429	0.39011		78.4	0.121451	0.344378	0.520681	0.611501	0.88214	0.206433	0.578331	0.311404		78.4	1.2166	1.65312	1.75219	1.59502	1.34471	1.30636	1.11646	0.627184		78.4	1.52085	2.00148	1.85116	2.19838	1.59581	1.04692	0.354051	-0.0659953
78.6	0.283499	0.312831	0.371729	0.630382	0.566395	0.140938	0.509275	0.123193			78.6	0.261966	0.214799	0.550852	0.562148	0.928459	0.388196	0.786804	0.392268		78.6	0.128731	0.344908	0.526089	0.618239	0.88838	0.208394	0.578392	0.31315		78.6	1.21977	1.65511	1.7564	1.59362	1.34275	1.30733	1.11867	0.624332		78.6	1.52263	2.00467	1.85397	2.2001	1.59791	1.04786	0.355949	-0.067723
78.8	0.288829	0.314287	0.38303	0.632991	0.574021	0.142529	0.512561	0.12458			78.8	0.262853	0.216474	0.553444	0.566924	0.932863	0.389439	0.796368	0.392536		78.8	0.146538	0.346422	0.529917	0.628572	0.893563	0.209165	0.58356	0.316126		78.8	1.22256	1.66054	1.75783	1.59613	1.34492	1.30946	1.11435	0.629109		78.8	1.52717	2.00646	1.85619	2.20077	1.59913	1.05005	0.35511	-0.0672816
79	0.289212	0.326757	0.388529	0.639896	0.575842	0.145088	0.515774	0.124317			79	0.26414	0.217846	0.55596	0.572855	0.939471	0.38907	0.801059	0.392715		79	0.157822	0.346122	0.534259	0.629622	0.898269	0.211158	0.591245	0.318488		79	1.22611	1.65962	1.75975	1.59431	1.34621	1.30443	1.12113	0.627733		79	1.5295	2.00963	1.85785	2.2025	1.60106	1.05211	0.356143	-0.067512
79.2	0.29162	0.32416	0.38805	0.643125	0.583494	0.147981	0.520185	0.124396			79.2	0.265747	0.217482	0.560048	0.579777	0.942016	0.391827	0.803552	0.396216		79.2	0.162988	0.351186	0.538142	0.638115	0.90435	0.213294	0.590527	0.317448		79.2	1.22777	1.66043	1.76176	1.59883	1.3481	1.30631	1.11624	0.629017		79.2	1.53361	2.01121	1.85921	2.20278	1.60133	1.05313	0.358649	-0.0685662
79.4	0.289522	0.319867	0.381363	0.646961	0.587306	0.149352	0.524567	0.124791			79.4	0.267101	0.217355	0.562845	0.587525	0.948331	0.395696	0.812114	0.400239		79.4	0.156437	0.356892	0.540602	0.647077	0.90668	0.215119	0.591245	0.317474		79.4	1.23106	1.66131	1.76397	1.6008	1.34826	1.31195	1.11605	0.627347		79.4	1.53708	2.0125	1.85998	2.20444	1.60357	1.05426	0.363412	-0.0695591
79.6	0.293117	0.328429	0.373887	0.652143	0.592101	0.150733	0.528457	0.126195			79.6	0.267808	0.219135	0.566915	0.593085	0.954	0.400861	0.816056	0.402167		79.6	0.144958	0.363455	0.544338	0.64922	0.910208	0.215848	0.600805	0.317514		79.6	1.23439	1.66713	1.76266	1.59895	1.35067	1.30862	1.11729	0.620693		79.6	1.53944	2.01668	1.86183	2.20497	1.60599	1.05588	0.361953	-0.0671692
79.8	0.291234	0.334872	0.374948	0.652722	0.597747	0.152122	0.528757	0.127535			79.8	0.269462	0.221085	0.570971	0.599411	0.959972	0.404184	0.819666	0.402108		79.8	0.135145	0.366218	0.54806	0.65773	0.913836	0.220694	0.608519	0.316988		79.8	1.23707	1.67065	1.76935	1.60106	1.34966	1.30581	1.11684	0.629127		79.8	1.54192	2.01835	1.86452	2.20791	1.60634	1.05683	0.365012	-0.0660387
80	0.296227	0.324618	0.384541	0.655395	0.600964	0.154064	0.532787	0.127286			80	0.270298	0.223089	0.574365	0.606233	0.963181	0.410216	0.828992	0.401692		80	0.14023	0.369559	0.550697	0.663164	0.918109	0.221929	0.609976	0.318797		80	1.23905	1.67565	1.76975	1.60195	1.3482	1.30938	1.11746	0.628905		80	1.54532	2.02095	1.86519	2.20943	1.60718	1.05698	0.366946	-0.0649864
80.2	0.294451	0.327722	0.399238	0.657609	0.606959	0.154698	0.53615	0.130662			80.2	0.271288	0.226922	0.57884	0.610784	0.970783	0.414884	0.832171	0.401801		80.2	0.154155	0.368535	0.553654	0.665187	0.92309	0.222771	0.615036	0.321079		80.2	1.24235	1.68025	1.76978	1.60182	1.35282	1.30884	1.11716	0.626756		80.2	1.54941	2.02102	1.86864	2.21142	1.60907	1.06029	0.365869	-0.0643783
80.4	0.297994	0.339059	0.407212	0.664578	0.608289	0.157933	0.540176	0.132237			80.4	0.27163	0.229315	0.583724	0.617129	0.975305	0.418187	0.840375	0.404296		80.4	0.169426	0.367639	0.558496	0.675252	0.930932	0.225786	0.623764	0.32281		80.4	1.24329	1.6764	1.77165	1.60394	1.35215	1.31187	1.11924	0.630305		80.4	1.55248	2.02486	1.87058	2.2134	1.60975	1.06199	0.365952	-0.0648657
80.6	0.297547	0.336808	0.410082	0.669365	0.617847	0.159389	0.544084	0.133215			80.6	0.271808	0.231677	0.586689	0.622778	0.981083	0.420974	0.848574	0.406647		80.6	0.174978	0.369922	0.562921	0.677183	0.936014	0.230481	0.626416	0.322948		80.6	1.24447	1.67541	1.77379	1.60868	1.35475	1.31231	1.11969	0.630736		80.6	1.55644	2.02616	1.87479	2.21737	1.61059	1.0639	0.36871	-0.0667065
80.8	0.301333	0.331146	0.407775	0.679814	0.616093	0.159818	0.550003	0.130806			80.8	0.272337	0.232646	0.589465	0.627292	0.987284	0.424046	0.850778	0.40842		80.8	0.168171	0.370576	0.568907	0.686684	0.942874	0.230518	0.62437	0.321022		80.8	1.25468	1.68215	1.77574	1.6049	1.35586	1.31027	1.11941	0.628708		80.8	1.55929	2.02918	1.87759	2.21681	1.61175	1.06447	0.366547	-0.064614
81	0.298363	0.342747	0.40178	0.684808	0.625509	0.162292	0.551902	0.132075			81	0.273902	0.234063	0.593816	0.631407	0.995481	0.424355	0.858527	0.405322		81	0.155667	0.373887	0.573403	0.695106	0.947762	0.233692	0.623325	0.319904		81	1.25739	1.68027	1.77888	1.60724	1.35275	1.31312	1.12126	0.635367		81	1.5632	2.0299	1.8801	2.21718	1.61229	1.0656	0.366803	-0.0663789
81.2	0.298587	0.346387	0.400049	0.694257	0.625793	0.163755	0.556912	0.130876			81.2	0.27443	0.235301	0.594828	0.637002	1.00158	0.427088	0.865345	0.406898		81.2	0.146751	0.377196	0.579584	0.697585	0.952508	0.237725	0.628992	0.321286		81.2	1.25672	1.68951	1.77849	1.60636	1.35196	1.31105	1.12099	0.633725		81.2	1.56384	2.03509	1.88041	2.21834	1.61241	1.06561	0.368944	-0.0657357
81.4	0.296303	0.339192	0.409632	0.697871	0.637053	0.165159	0.556854	0.131382			81.4	0.275496	0.237179	0.597318	0.64108	1.00693	0.428485	0.864988	0.410404		81.4	0.147756	0.380781	0.584692	0.70819	0.956381	0.240418	0.631749	0.32362		81.4	1.25684	1.68278	1.77943	1.61054	1.35708	1.30984	1.1208	0.635472		81.4	1.56536	2.0347	1.88576	2.22027	1.61439	1.06693	0.368234	-0.066348
81.6	0.296874	0.342313	0.423524	0.70228	0.634487	0.166146	0.560449	0.131149			81.6	0.27814	0.239439	0.600555	0.645102	1.01275	0.433103	0.874352	0.412464		81.6	0.162038	0.38354	0.588426	0.71332	0.962194	0.240552	0.627861	0.325951		81.6	1.26383	1.68611	1.78146	1.60928	1.35505	1.31721	1.12515	0.630468		81.6	1.56843	2.03676	1.88478	2.22018	1.61421	1.06775	0.368177	-0.0658799
81.8	0.293792	0.354514	0.432848	0.70337	0.646188	0.168581	0.564693	0.133343			81.8	0.279628	0.243498	0.60382	0.650943	1.01893	0.436425	0.878754	0.412467		81.8	0.178545	0.384066	0.591388	0.715743	0.966881	0.243314	0.629657	0.329457		81.8	1.2661	1.69449	1.78035	1.61001	1.35552	1.31618	1.12403	0.637267		81.8	1.57186	2.03637	1.88567	2.22306	1.61652	1.06951	0.368067	-0.0672607
82	0.292976	0.349725	0.437204	0.709768	0.644567	0.169368	0.567499	0.136317			82	0.279703	0.245694	0.606706	0.657163	1.02325	0.440877	0.883316	0.414522		82	0.185074	0.386304	0.595224	0.726582	0.971951	0.245388	0.638095	0.329901		82	1.27017	1.69024	1.78438	1.60869	1.35801	1.30943	1.12457	0.633056		82	1.57476	2.0391	1.88841	2.22554	1.61757	1.07033	0.369311	-0.0646763
82.2	0.298211	0.346242	0.435919	0.711289	0.655468	0.171419	0.567554	0.13746			82.2	0.280803	0.24704	0.612482	0.663589	1.02841	0.441193	0.890986	0.412945		82.2	0.179065	0.389448	0.598784	0.730634	0.977288	0.246923	0.642054	0.3297		82.2	1.27015	1.69044	1.78172	1.61369	1.35991	1.31461	1.12607	0.636602		82.2	1.57791	2.04	1.8894	2.22725	1.62018	1.07088	0.371299	-0.0655543
82.4	0.298344	0.358997	0.428769	0.717479	0.65475	0.172587	0.571746	0.13737			82.4	0.281763	0.250069	0.616245	0.671258	1.03439	0.446851	0.89632	0.416259		82.4	0.168246	0.388822	0.601695	0.736172	0.981663	0.249121	0.639792	0.329545		82.4	1.27397	1.69563	1.78511	1.61719	1.35848	1.31302	1.12543	0.633095		82.4	1.58068	2.04238	1.88936	2.22719	1.62037	1.07113	0.373336	-0.0641181
82.6	0.300126	0.361886	0.425221	0.723762	0.665788	0.174317	0.573551	0.138788			82.6	0.282316	0.251916	0.620525	0.678734	1.04036	0.447579	0.903479	0.419306		82.6	0.157978	0.388774	0.607043	0.746314	0.986775	0.252996	0.644936	0.330182		82.6	1.27367	1.69694	1.78665	1.61578	1.35927	1.31663	1.12575	0.632444		82.6	1.58369	2.04328	1.89214	2.22799	1.62214	1.07087	0.374272	-0.063622
82.8	0.301892	0.353682	0.431232	0.731187	0.666212	0.177764	0.57741	0.140349			82.8	0.284473	0.251956	0.62406	0.685685	1.04666	0.445623	0.911372	0.420921		82.8	0.160568	0.392258	0.611195	0.747671	0.991959	0.255625	0.653022	0.331004		82.8	1.27205	1.69975	1.78573	1.61974	1.3608	1.31373	1.12686	0.636702		82.8	1.5855	2.04657	1.89343	2.22793	1.62255	1.07273	0.376291	-0.0638654
83	0.302565	0.359339	0.444125	0.734496	0.676566	0.178154	0.58499	0.139801			83	0.284491	0.255923	0.627079	0.69225	1.05353	0.446338	0.916175	0.421012		83	0.174366	0.394449	0.617012	0.753518	0.999528	0.258118	0.656617	0.33421		83	1.28041	1.69749	1.79198	1.61452	1.36146	1.31229	1.12446	0.640913		83	1.58895	2.04862	1.89418	2.2285	1.62434	1.07398	0.376019	-0.0649574
83.2	0.299429	0.369961	0.457215	0.743626	0.675877	0.180912	0.590656	0.14089			83.2	0.28531	0.257333	0.628706	0.697785	1.05937	0.450254	0.926447	0.425188		83.2	0.18648	0.393519	0.622433	0.762878	1.00688	0.261352	0.65351	0.336868		83.2	1.28203	1.70298	1.78809	1.61631	1.35848	1.31941	1.12444	0.639531		83.2	1.59166	2.04987	1.89858	2.22908	1.62533	1.07546	0.374509	-0.0653067
83.4	0.304283	0.364336	0.462864	0.747543	0.686307	0.182533	0.596284	0.141939			83.4	0.287042	0.260576	0.63237	0.702416	1.06895	0.450769	0.933796	0.424252		83.4	0.19094	0.398434	0.626877	0.762485	1.01467	0.263847	0.658534	0.337286		83.4	1.28432	1.70213	1.79266	1.61837	1.36412	1.32144	1.1262	0.635459		83.4	1.5952	2.0526	1.89864	2.23024	1.62604	1.07593	0.372489	-0.0656641
83.6	0.303416	0.362244	0.462844	0.749249	0.686333	0.185065	0.598662	0.142129			83.6	0.289851	0.264217	0.636184	0.707219	1.0743	0.45618	0.937564	0.423638		83.6	0.185754	0.402391	0.632078	0.77339	1.02244	0.266299	0.665892	0.337067		83.6	1.28328	1.70439	1.792	1.62073	1.36442	1.32149	1.12781	0.637902		83.6	1.59553	2.05441	1.90062	2.23107	1.6263	1.07801	0.373735	-0.0671227
83.8	0.303257	0.375091	0.459031	0.752898	0.695207	0.184731	0.602371	0.142146			83.8	0.289414	0.267595	0.64055	0.710332	1.07883	0.460015	0.946218	0.424407		83.8	0.174261	0.406806	0.637322	0.779136	1.02767	0.268491	0.670201	0.335673		83.8	1.29399	1.70256	1.79629	1.61992	1.36703	1.31397	1.12614	0.640059		83.8	1.59679	2.05655	1.90346	2.23203	1.62733	1.07674	0.375598	-0.0665632
84	0.304366	0.378819	0.457871	0.755407	0.695108	0.1872	0.604071	0.143399			84	0.290873	0.267762	0.645478	0.712122	1.08182	0.463738	0.950096	0.42803		84	0.167557	0.409025	0.641885	0.783903	1.03391	0.271582	0.672011	0.334416		84	1.29513	1.70777	1.79436	1.62432	1.36412	1.3201	1.13131	0.639401		84	1.59756	2.05787	1.90607	2.23304	1.6292	1.0769	0.375728	-0.0665381
84.2	0.305038	0.371416	0.463307	0.7555	0.702662	0.1869	0.605996	0.145109			84.2	0.291945	0.271705	0.650422	0.713508	1.0884	0.466118	0.955964	0.429999		84.2	0.173871	0.413291	0.644554	0.79708	1.038	0.273676	0.676057	0.333264		84.2	1.29401	1.70987	1.79533	1.61986	1.36617	1.31861	1.12858	0.638717		84.2	1.60221	2.06041	1.90381	2.23524	1.63113	1.07746	0.376648	-0.0661527
84.4	0.303422	0.376124	0.475471	0.764418	0.704839	0.189899	0.609571	0.146147			84.4	0.293281	0.273629	0.654191	0.714442	1.09025	0.468258	0.963464	0.430685		84.4	0.186888	0.414248	0.650062	0.803391	1.04198	0.27638	0.68249	0.334933		84.4	1.29848	1.71548	1.79621	1.62337	1.36193	1.31692	1.12516	0.639952		84.4	1.60536	2.06197	1.90651	2.23445	1.63125	1.07853	0.380371	-0.0669821
84.6	0.303964	0.387112	0.484577	0.770258	0.711855	0.191803	0.614186	0.1462			84.6	0.293263	0.274466	0.658266	0.716349	1.09729	0.468837	0.967987	0.430538		84.6	0.194458	0.416638	0.654324	0.806295	1.04733	0.277861	0.686406	0.337381		84.6	1.29522	1.71311	1.8035	1.62537	1.3687	1.32305	1.13219	0.642665		84.6	1.60927	2.06383	1.90683	2.23568	1.63377	1.07832	0.380599	-0.0652254
84.8	0.306577	0.382971	0.48969	0.776139	0.713681	0.193722	0.614397	0.145901			84.8	0.294208	0.276415	0.661231	0.719808	1.10477	0.474958	0.976053	0.433864		84.8	0.193314	0.418299	0.657905	0.822133	1.05461	0.280616	0.686412	0.341061		84.8	1.29713	1.71766	1.80147	1.62437	1.37137	1.32149	1.13106	0.643686		84.8	1.6122	2.06628	1.90871	2.23662	1.63428	1.0798	0.381629	-0.066256
85	0.308652	0.379633	0.487911	0.784228	0.722034	0.196792	0.612028	0.145466			85	0.295463	0.280455	0.66568	0.725512	1.11261	0.477696	0.980346	0.436206		85	0.187293	0.41955	0.66308	0.827662	1.05957	0.283802	0.687954	0.343267		85	1.30463	1.72111	1.80018	1.62638	1.36675	1.31717	1.13031	0.642461		85	1.61446	2.06825	1.9106	2.23651	1.6357	1.08106	0.385803	-0.064994
85.2	0.310695	0.39058	0.482629	0.791552	0.726581	0.199201	0.612209	0.14562			85.2	0.296788	0.282474	0.669054	0.732082	1.11884	0.482466	0.98462	0.438242		85.2	0.181979	0.423188	0.668716	0.82697	1.06709	0.286987	0.695738	0.343333		85.2	1.30704	1.71374	1.80344	1.62571	1.36562	1.32259	1.12828	0.644536		85.2	1.61604	2.07002	1.91417	2.23642	1.63596	1.08178	0.383091	-0.0652818
85.4	0.311022	0.396456	0.478872	0.788992	0.732655	0.201596	0.612712	0.146251			85.4	0.298222	0.284881	0.672817	0.740616	1.1256	0.484844	0.994033	0.43908		85.4	0.183407	0.425857	0.672312	0.844014	1.07353	0.28966	0.702266	0.34288		85.4	1.31298	1.71747	1.81204	1.63027	1.36351	1.31805	1.12631	0.644073		85.4	1.61755	2.07091	1.91523	2.23943	1.63758	1.08243	0.382293	-0.0628532
85.6	0.312638	0.388508	0.486824	0.792385	0.739985	0.202879	0.6192	0.149142			85.6	0.300659	0.287467	0.676511	0.748838	1.13263	0.485841	0.997201	0.439995		85.6	0.196121	0.431177	0.677224	0.850417	1.07825	0.293162	0.703441	0.34085		85.6	1.31121	1.72015	1.79994	1.62732	1.36722	1.32363	1.13057	0.642316		85.6	1.61906	2.07354	1.91571	2.24123	1.63845	1.08305	0.380829	-0.0646274
85.8	0.314055	0.389889	0.498386	0.79706	0.745918	0.204979	0.623394	0.151241			85.8	0.302361	0.289511	0.681192	0.757228	1.13804	0.48591	1.00287	0.442619		85.8	0.206257	0.43318	0.682382	0.848543	1.0843	0.297568	0.706764	0.34017		85.8	1.31744	1.72286	1.80718	1.63266	1.37332	1.31582	1.12986	0.644158		85.8	1.6238	2.07423	1.91586	2.24211	1.6389	1.08404	0.380935	-0.0638299
86	0.315946	0.401041	0.506088	0.800921	0.750737	0.205467	0.631754	0.15356			86	0.302778	0.290878	0.683028	0.764171	1.14433	0.487781	1.01218	0.450115		86	0.207163	0.440177	0.686695	0.858056	1.08977	0.299501	0.712935	0.341511		86	1.3144	1.72019	1.80432	1.62184	1.36878	1.32117	1.13222	0.645112		86	1.62596	2.07777	1.91927	2.24564	1.63828	1.08521	0.380423	-0.0644852
86.2	0.315558	0.401247	0.508798	0.809135	0.754846	0.208143	0.640358	0.153533			86.2	0.303018	0.294529	0.686488	0.770963	1.14774	0.487575	1.01729	0.451341		86.2	0.200225	0.441686	0.690694	0.868404	1.09449	0.302392	0.719551	0.345334		86.2	1.31725	1.72446	1.80398	1.62918	1.37194	1.32636	1.13304	0.646556		86.2	1.62846	2.08201	1.92128	2.24524	1.63851	1.08569	0.381517	-0.0634654
86.4	0.318033	0.395481	0.509304	0.820011	0.762645	0.208464	0.645952	0.153917			86.4	0.30488	0.295998	0.691916	0.779262	1.15356	0.491029	1.02459	0.445323		86.4	0.193469	0.447569	0.69634	0.866994	1.10014	0.306477	0.718475	0.34748		86.4	1.31701	1.72775	1.80863	1.6328	1.37057	1.32649	1.13196	0.642935		86.4	1.63109	2.08411	1.92546	2.24505	1.64005	1.08708	0.38448	-0.0633245
86.6	0.319256	0.401629	0.509401	0.826543	0.763968	0.210098	0.644469	0.154197			86.6	0.305086	0.298068	0.694493	0.785443	1.15685	0.495458	1.03057	0.446295		86.6	0.192027	0.447198	0.701608	0.872936	1.10821	0.310751	0.719903	0.348994		86.6	1.3192	1.73239	1.81207	1.63138	1.37243	1.3241	1.12798	0.648388		86.6	1.63171	2.08616	1.92859	2.2465	1.6412	1.08848	0.386781	-0.0620489
86.8	0.318249	0.411622	0.515083	0.831356	0.77122	0.213864	0.64795	0.15572			86.8	0.306035	0.30102	0.696948	0.790944	1.16293	0.501153	1.03824	0.450739		86.8	0.202389	0.451013	0.708235	0.886545	1.11444	0.313276	0.725506	0.34917		86.8	1.32432	1.72634	1.81025	1.63348	1.37467	1.32139	1.13402	0.642888		86.8	1.63219	2.0881	1.92997	2.2474	1.64287	1.08879	0.387192	-0.0624053
87	0.31651	0.409634	0.52155	0.834926	0.773953	0.215473	0.653034	0.155772			87	0.308572	0.304988	0.701684	0.798278	1.16833	0.503774	1.04483	0.45806		87	0.21069	0.449413	0.712138	0.890168	1.12103	0.316979	0.729677	0.348531		87	1.32519	1.7277	1.80855	1.63273	1.37573	1.32658	1.13004	0.651341		87	1.6346	2.08857	1.92856	2.24663	1.64557	1.0883	0.385945	-0.0618514
87.2	0.318876	0.40694	0.527818	0.837808	0.782041	0.217467	0.652782	0.157471			87.2	0.310133	0.306922	0.707446	0.806042	1.17491	0.506174	1.04849	0.450985		87.2	0.21382	0.453696	0.717765	0.893184	1.12849	0.320646	0.728714	0.347562		87.2	1.32937	1.72717	1.8141	1.63379	1.3722	1.32151	1.13662	0.649121		87.2	1.63506	2.08785	1.92947	2.24894	1.6466	1.08886	0.385354	-0.0633155
87.4	0.319939	0.414309	0.531565	0.841597	0.782946	0.220213	0.656574	0.157339			87.4	0.309364	0.308215	0.711288	0.812911	1.18129	0.511477	1.05733	0.445594		87.4	0.208737	0.453639	0.721433	0.906995	1.13812	0.323272	0.731508	0.349106		87.4	1.33149	1.72956	1.81578	1.63072	1.37264	1.32582	1.13271	0.647139		87.4	1.63788	2.09015	1.92589	2.25089	1.64664	1.08772	0.382871	-0.0639974
87.6	0.320595	0.422217	0.532565	0.846737	0.793487	0.225332	0.658835	0.158456			87.6	0.311864	0.310463	0.716017	0.819562	1.18866	0.515027	1.06574	0.448302		87.6	0.199493	0.459352	0.724998	0.916665	1.14493	0.325498	0.73855	0.352269		87.6	1.33053	1.73822	1.81726	1.6347	1.37061	1.32503	1.13463	0.64504		87.6	1.64076	2.08899	1.92618	2.24936	1.6482	1.08768	0.384552	-0.0640205
87.8	0.321413	0.418475	0.535781	0.853288	0.794757	0.224811	0.665366	0.157292			87.8	0.312738	0.313288	0.720272	0.826397	1.19327	0.514001	1.06939	0.463786		87.8	0.195826	0.457324	0.730076	0.917387	1.15309	0.328806	0.74292	0.354777		87.8	1.33151	1.73197	1.81152	1.63296	1.37185	1.32211	1.13262	0.647219		87.8	1.64276	2.09052	1.92834	2.24988	1.64848	1.08851	0.384136	-0.0617397
88	0.324298	0.415951	0.542009	0.859319	0.804203	0.227489	0.669263	0.157942			88	0.313508	0.315032	0.724288	0.831512	1.20087	0.517264	1.0782	0.462293		88	0.206892	0.459873	0.734492	0.924323	1.15865	0.331776	0.742852	0.356647		88	1.33633	1.73659	1.81666	1.63749	1.37661	1.32819	1.13945	0.650233		88	1.64506	2.09124	1.93074	2.25055	1.64709	1.08971	0.383748	-0.0621521
88.2	0.325306	0.423332	0.548444	0.866403	0.805435	0.228793	0.674493	0.157551			88.2	0.31597	0.318028	0.725362	0.834573	1.20722	0.522881	1.08574	0.45348		88.2	0.219525	0.462869	0.739267	0.938151	1.16448	0.333816	0.747606	0.357941		88.2	1.33929	1.73593	1.81612	1.6411	1.37686	1.32412	1.13466	0.646559		88.2	1.64917	2.09162	1.93288	2.24977	1.64759	1.09092	0.388204	-0.0605753
88.4	0.326532	0.430081	0.551499	0.872847	0.817438	0.231154	0.678946	0.159364			88.4	0.319034	0.322203	0.728376	0.837372	1.21415	0.524102	1.09248	0.453614		88.4	0.221951	0.46679	0.743319	0.939858	1.17077	0.336715	0.753987	0.356958		88.4	1.3414	1.73854	1.81742	1.63847	1.37603	1.32507	1.13804	0.647359		88.4	1.65019	2.09204	1.93915	2.24991	1.6495	1.09328	0.389632	-0.0607984
88.6	0.333048	0.42469	0.552519	0.878521	0.818389	0.231725	0.685963	0.159291			88.6	0.319604	0.32791	0.732368	0.838282	1.21935	0.529139	1.09657	0.466256		88.6	0.221113	0.463525	0.748606	0.943118	1.17753	0.339408	0.758319	0.355063		88.6	1.34445	1.74072	1.8213	1.63704	1.37692	1.32945	1.13933	0.650353		88.6	1.65364	2.09455	1.943	2.25119	1.64942	1.09429	0.389029	-0.0608673
88.8	0.335711	0.424906	0.550505	0.883863	0.829869	0.233993	0.687923	0.161137			88.8	0.321473	0.331068	0.737352	0.840131	1.22457	0.534044	1.10266	0.470889		88.8	0.214812	0.465922	0.751638	0.955137	1.18409	0.342691	0.758113	0.354802		88.8	1.34158	1.74333	1.82125	1.63652	1.37569	1.32348	1.13528	0.650263		88.8	1.6547	2.09702	1.94447	2.25182	1.65184	1.095	0.38877	-0.0609013
89	0.337411	0.434673	0.555327	0.889405	0.830894	0.236635	0.69008	0.162262			89	0.322493	0.332955	0.74141	0.843944	1.23024	0.540164	1.10929	0.460089		89	0.209981	0.469369	0.758331	0.967794	1.19253	0.346267	0.760606	0.355357		89	1.34785	1.74407	1.8224	1.6363	1.37405	1.32259	1.13663	0.653008		89	1.65651	2.09745	1.94744	2.25226	1.65474	1.09574	0.390655	-0.0605179
89.2	0.340824	0.439891	0.565912	0.8894	0.839867	0.23872	0.694593	0.162898			89.2	0.322797	0.335097	0.746938	0.849604	1.2366	0.54471	1.11424	0.458753		89.2	0.217546	0.471524	0.764469	0.969907	1.20076	0.350086	0.764902	0.356935		89.2	1.35325	1.74103	1.82066	1.63873	1.37843	1.32823	1.13071	0.64951		89.2	1.65823	2.1008	1.94802	2.25394	1.65482	1.09633	0.390833	-0.0611186
89.4	0.342432	0.435353	0.575974	0.891428	0.839543	0.240657	0.695859	0.163677			89.4	0.32448	0.338791	0.750968	0.85672	1.24505	0.547886	1.12116	0.471746		89.4	0.230433	0.472783	0.769817	0.978727	1.20874	0.35344	0.766888	0.360899		89.4	1.34887	1.7505	1.82362	1.64462	1.37267	1.32868	1.13192	0.653181		89.4	1.66046	2.10223	1.946	2.255	1.65512	1.09572	0.388905	-0.0606753
89.6	0.34222	0.4369	0.581394	0.897244	0.848854	0.242204	0.702232	0.164246			89.6	0.325746	0.33926	0.755451	0.866557	1.25517	0.547126	1.13052	0.481473		89.6	0.233265	0.479598	0.776262	0.993422	1.21672	0.356607	0.766084	0.363627		89.6	1.3559	1.74965	1.82665	1.64007	1.37874	1.32242	1.14098	0.649401		89.6	1.66203	2.10506	1.94483	2.25721	1.65438	1.09711	0.388109	-0.0590153
89.8	0.34044	0.447317	0.58088	0.898651	0.847899	0.246396	0.704551	0.165607			89.8	0.32719	0.339795	0.758771	0.876096	1.26448	0.553568	1.13572	0.465595		89.8	0.231783	0.485269	0.78144	0.999236	1.22437	0.357955	0.768662	0.366031		89.8	1.35434	1.74789	1.82385	1.64308	1.37625	1.32864	1.13265	0.654849		89.8	1.66404	2.10539	1.94478	2.25641	1.65344	1.09709	0.388594	-0.060137
90	0.341231	0.448526	0.578869	0.902923	0.857852	0.247194	0.707705	0.166145			90	0.328056	0.342395	0.764429	0.88254	1.2697	0.556904	1.14249	0.462087		90	0.226305	0.487044	0.786235	0.998461	1.23112	0.360839	0.774001	0.365136		90	1.35341	1.75034	1.82226	1.64123	1.37744	1.32577	1.13284	0.653426		90	1.66711	2.10722	1.94376	2.25775	1.65427	1.09613	0.389709	-0.0612676
90.2	0.336223	0.443643	0.582693	0.912256	0.859168	0.250293	0.708425	0.166626			90.2	0.33079	0.345304	0.768258	0.890217	1.27815	0.559094	1.14929	0.473078		90.2	0.223134	0.488872	0.790161	1.00753	1.23887	0.36327	0.780162	0.366119		90.2	1.35734	1.74936	1.82793	1.63986	1.38147	1.3286	1.13685	0.650768		90.2	1.66779	2.10709	1.94609	2.25906	1.65603	1.09668	0.388122	-0.0589025
90.4	0.338776	0.446771	0.59023	0.919396	0.870081	0.250803	0.713974	0.16714			90.4	0.333069	0.346756	0.772619	0.89859	1.28399	0.563913	1.1556	0.48643		90.4	0.229096	0.489788	0.796246	1.02106	1.24545	0.365377	0.782708	0.364403		90.4	1.35876	1.75229	1.82976	1.64254	1.37626	1.3264	1.13983	0.651902		90.4	1.66947	2.1085	1.94905	2.25912	1.65649	1.09917	0.387362	-0.058473
90.6	0.341486	0.457486	0.594593	0.922022	0.871307	0.253084	0.715198	0.167388			90.6	0.333988	0.349416	0.775996	0.906222	1.28983	0.56726	1.16412	0.476811		90.6	0.23811	0.491619	0.799659	1.02178	1.25175	0.367527	0.785305	0.364265		90.6	1.36252	1.75386	1.82747	1.64196	1.37595	1.33008	1.13519	0.651553		90.6	1.67089	2.10931	1.95063	2.25893	1.65747	1.09922	0.390154	-0.0579066
90.8	0.349049	0.456751	0.599526	0.931712	0.882283	0.253272	0.716888	0.168706			90.8	0.332667	0.352749	0.780566	0.913661	1.29565	0.567778	1.16962	0.474564		90.8	0.238103	0.493077	0.805461	1.02413	1.25679	0.371347	0.789987	0.363117		90.8	1.36144	1.75369	1.82888	1.64493	1.37517	1.32912	1.1369	0.656084		90.8	1.67377	2.10978	1.95332	2.26133	1.65905	1.10013	0.390421	-0.0569272
91	0.347536	0.454342	0.602111	0.938873	0.884825	0.256044	0.716701	0.169741			91	0.334179	0.357878	0.783399	0.922174	1.30446	0.569696	1.17817	0.483886		91	0.236776	0.496814	0.811878	1.03793	1.26471	0.373819	0.798095	0.366129		91	1.36616	1.75664	1.8329	1.64963	1.37749	1.33328	1.13718	0.655004		91	1.67436	2.11305	1.95623	2.26242	1.65813	1.10198	0.389968	-0.0535695
91.2	0.35283	0.457942	0.604695	0.939974	0.89557	0.258255	0.721054	0.16999			91.2	0.333404	0.3594	0.78716	0.928943	1.31085	0.573122	1.18431	0.498833		91.2	0.233219	0.499331	0.817318	1.04642	1.26976	0.377496	0.801269	0.366999		91.2	1.36802	1.75167	1.82922	1.64252	1.37793	1.32689	1.13735	0.655283		91.2	1.677	2.1152	1.95695	2.26263	1.65697	1.10307	0.391671	-0.0570697
91.4	0.352097	0.46786	0.612502	0.945095	0.89819	0.262141	0.72385	0.168954			91.4	0.334478	0.36138	0.790384	0.93349	1.31544	0.573663	1.19215	0.48749		91.4	0.233652	0.50487	0.823868	1.04498	1.27727	0.380786	0.80354	0.36982		91.4	1.36862	1.75434	1.82941	1.64486	1.37786	1.32604	1.13564	0.657428		91.4	1.67678	2.11549	1.95696	2.2635	1.65871	1.10153	0.396051	-0.0565761
91.6	0.35021	0.467322	0.622227	0.953034	0.90623	0.265761	0.725989	0.170424			91.6	0.333092	0.363532	0.794557	0.93639	1.32089	0.575435	1.19944	0.478177		91.6	0.242703	0.504443	0.829475	1.05417	1.2853	0.383408	0.813089	0.370902		91.6	1.36883	1.75737	1.83381	1.64945	1.37931	1.32912	1.13829	0.652674		91.6	1.67877	2.11632	1.9581	2.26364	1.65783	1.10121	0.394979	-0.0575963
91.8	0.347784	0.463085	0.626169	0.953829	0.908314	0.267864	0.727579	0.169898			91.8	0.335255	0.365405	0.799668	0.93773	1.3262	0.579913	1.20544	0.487276		91.8	0.252654	0.509649	0.835653	1.06808	1.29378	0.386338	0.820703	0.372281		91.8	1.37029	1.76039	1.83218	1.64716	1.37966	1.3333	1.13874	0.655629		91.8	1.67995	2.1183	1.95718	2.26578	1.65788	1.10267	0.397591	-0.058408
92	0.351917	0.46729	0.628984	0.958821	0.915726	0.271087	0.733391	0.16947			92	0.336734	0.36702	0.804713	0.940302	1.33288	0.581033	1.21214	0.502539		92	0.252065	0.510789	0.837478	1.07048	1.30144	0.389165	0.825005	0.371716		92	1.37276	1.75664	1.83281	1.64702	1.37974	1.32844	1.13562	0.657439		92	1.68161	2.11868	1.95627	2.26559	1.65842	1.10283	0.398122	-0.0605901
92.2	0.35383	0.478227	0.627189	0.964501	0.919264	0.271634	0.739385	0.171321			92.2	0.339814	0.371063	0.810514	0.943934	1.33863	0.582649	1.21999	0.491029		92.2	0.248181	0.513015	0.842084	1.07305	1.30809	0.391136	0.827143	0.37242		92.2	1.37482	1.76446	1.8352	1.64529	1.37974	1.32752	1.13738	0.652119		92.2	1.68343	2.12082	1.95797	2.26602	1.66011	1.10191	0.400596	-0.057818
92.4	0.356688	0.477725	0.623584	0.971477	0.928333	0.273709	0.742947	0.174284			92.4	0.339868	0.375346	0.815327	0.951288	1.34584	0.586994	1.22481	0.482048		92.4	0.244696	0.514656	0.846335	1.09037	1.31383	0.394878	0.831587	0.373104		92.4	1.37826	1.75938	1.83161	1.64861	1.38081	1.32977	1.13786	0.6541		92.4	1.68896	2.12193	1.96087	2.2681	1.65931	1.10362	0.401459	-0.0582277
92.6	0.358039	0.472941	0.632034	0.978305	0.932574	0.272318	0.745814	0.174494			92.6	0.342621	0.378918	0.819886	0.959775	1.3521	0.59159	1.23292	0.490056		92.6	0.245188	0.517228	0.852782	1.09839	1.32046	0.398251	0.834217	0.374904		92.6	1.3744	1.76311	1.83799	1.64906	1.38205	1.33009	1.13784	0.65969		92.6	1.6906	2.12403	1.96147	2.2695	1.66253	1.1037	0.401934	-0.0583603
92.8	0.359093	0.480871	0.641916	0.987672	0.940084	0.276168	0.751706	0.175291			92.8	0.343328	0.382054	0.824473	0.968919	1.35753	0.594347	1.23982	0.504653		92.8	0.253103	0.517868	0.857195	1.09913	1.32849	0.401336	0.838039	0.376939		92.8	1.38197	1.76413	1.83694	1.65025	1.38004	1.32646	1.13922	0.656848		92.8	1.69264	2.12531	1.96303	2.2683	1.66325	1.10331	0.402442	-0.05659
93	0.359985	0.489166	0.645562	0.9935	0.945818	0.277534	0.751239	0.176679			93	0.346005	0.383232	0.829475	0.9778	1.364	0.599906	1.24708	0.496141		93	0.258328	0.521292	0.86525	1.109	1.33579	0.40467	0.838742	0.379328		93	1.38079	1.76504	1.8365	1.65265	1.38311	1.3302	1.14161	0.659439		93	1.69502	2.126	1.96504	2.26924	1.66424	1.10389	0.401321	-0.0556679
93.2	0.362299	0.484783	0.64936	1.00116	0.952242	0.280581	0.754559	0.177264			93.2	0.345354	0.383515	0.833217	0.986522	1.37195	0.605613	1.25402	0.487532		93.2	0.257784	0.52274	0.871713	1.12458	1.34222	0.407835	0.842755	0.380052		93.2	1.38015	1.76458	1.83656	1.65072	1.38141	1.32715	1.14072	0.656634		93.2	1.69537	2.12554	1.96459	2.26883	1.66527	1.10496	0.399265	-0.0565761
93.4	0.36232	0.480651	0.655207	1.00484	0.957692	0.282462	0.756048	0.177243			93.4	0.34628	0.383893	0.837325	0.995724	1.37947	0.611137	1.26106	0.492806		93.4	0.253412	0.528158	0.876534	1.12513	1.35056	0.410005	0.84818	0.37976		93.4	1.38653	1.76892	1.83568	1.64793	1.38367	1.32971	1.13423	0.659344		93.4	1.69454	2.12865	1.96454	2.26924	1.66438	1.10464	0.398543	-0.0579988
93.6	0.362449	0.490309	0.659141	1.00986	0.964165	0.285802	0.759434	0.177526			93.6	0.347709	0.384641	0.842227	1.00407	1.38633	0.615221	1.26976	0.510086		93.6	0.252273	0.53586	0.881919	1.12912	1.3594	0.412554	0.852274	0.380689		93.6	1.38333	1.77087	1.83825	1.65192	1.37941	1.32861	1.13977	0.659763		93.6	1.69777	2.12953	1.96361	2.27082	1.66407	1.10716	0.397695	-0.0571281
93.8	0.363554	0.496998	0.662196	1.01683	0.97063	0.285672	0.765446	0.178316			93.8	0.349793	0.389058	0.845728	1.01302	1.39487	0.619499	1.27573	0.502026		93.8	0.25709	0.538004	0.886465	1.14562	1.3676	0.415225	0.855389	0.38067		93.8	1.38802	1.76525	1.84126	1.65215	1.38322	1.32918	1.14123	0.657454		93.8	1.69936	2.1292	1.96581	2.2723	1.66476	1.10675	0.399322	-0.060016
94	0.365483	0.494395	0.666939	1.02349	0.974732	0.288256	0.773709	0.17964			94	0.350291	0.393295	0.850552	1.02035	1.40057	0.621106	1.2825	0.491998		94	0.265773	0.535447	0.891971	1.15542	1.37556	0.418205	0.856816	0.38004		94	1.38703	1.77154	1.84007	1.64969	1.38427	1.32729	1.13639	0.657223		94	1.70071	2.12914	1.96662	2.27334	1.66443	1.10669	0.404933	-0.0588612
94.2	0.364647	0.493653	0.671009	1.03131	0.980476	0.291012	0.774941	0.178368			94.2	0.350994	0.399007	0.85407	1.02526	1.40456	0.624249	1.29175	0.49934		94.2	0.266644	0.538036	0.897888	1.15436	1.3844	0.42072	0.857435	0.379729		94.2	1.3923	1.77065	1.84118	1.64669	1.38124	1.32779	1.13981	0.6598		94.2	1.7025	2.13213	1.96839	2.27577	1.6642	1.10777	0.410692	-0.0586397
94.4	0.366023	0.50118	0.673311	1.03686	0.985301	0.292778	0.781186	0.179685			94.4	0.353763	0.402747	0.858783	1.0275	1.41111	0.625889	1.29774	0.52045		94.4	0.266439	0.534347	0.903702	1.16735	1.39249	0.42374	0.863895	0.382754		94.4	1.39085	1.77126	1.84479	1.65031	1.38263	1.33382	1.14125	0.658896		94.4	1.70517	2.13108	1.96897	2.27419	1.66556	1.10928	0.414738	-0.0566907
94.6	0.366226	0.507205	0.677953	1.03942	0.993196	0.297155	0.790093	0.181573			94.6	0.356491	0.406055	0.863602	1.02854	1.41881	0.628652	1.30579	0.513709		94.6	0.265048	0.528967	0.90977	1.18075	1.3986	0.427979	0.868026	0.383733		94.6	1.39182	1.77183	1.84105	1.65123	1.38766	1.33422	1.14366	0.660715		94.6	1.7058	2.13127	1.97174	2.27444	1.66657	1.10821	0.421698	-0.0570968
94.8	0.367209	0.50421	0.687105	1.04579	0.996785	0.300185	0.794235	0.181121			94.8	0.358481	0.407704	0.868515	1.03078	1.42375	0.632718	1.31205	0.502612		94.8	0.266591	0.53228	0.915681	1.18257	1.40496	0.431042	0.869388	0.386331		94.8	1.39766	1.77281	1.84871	1.65399	1.38231	1.32727	1.14405	0.658433		94.8	1.70857	2.13379	1.97252	2.27495	1.66611	1.10988	0.425292	-0.0554317
95	0.368176	0.502977	0.691972	1.0495	1.00605	0.302772	0.797301	0.181896			95	0.35854	0.407878	0.873096	1.03486	1.43008	0.635539	1.31859	0.513027		95	0.270987	0.539188	0.921037	1.18533	1.41308	0.434125	0.871851	0.388717		95	1.39943	1.77753	1.8398	1.65402	1.38404	1.32885	1.14293	0.661599		95	1.70941	2.13556	1.97325	2.27482	1.66756	1.11048	0.426448	-0.0568353
95.2	0.369913	0.510662	0.696642	1.05258	1.01035	0.304984	0.804329	0.184854			95.2	0.360402	0.40811	0.879082	1.04036	1.4372	0.640743	1.32639	0.530587		95.2	0.275664	0.538473	0.925164	1.19896	1.421	0.438011	0.878532	0.389895		95.2	1.39991	1.77788	1.84184	1.65232	1.37951	1.32954	1.13934	0.659159		95.2	1.71136	2.13437	1.97457	2.27373	1.66868	1.11125	0.426855	-0.0551759
95.4	0.370726	0.519401	0.700872	1.05646	1.02035	0.309162	0.806532	0.185859			95.4	0.362322	0.411127	0.883362	1.05107	1.44385	0.644615	1.33301	0.517057		95.4	0.275237	0.542334	0.930629	1.20723	1.42653	0.441314	0.884813	0.389433		95.4	1.39972	1.77163	1.84486	1.65388	1.38016	1.32942	1.14078	0.661135		95.4	1.71135	2.13629	1.97417	2.27637	1.66953	1.11043	0.428807	-0.0564123
95.6	0.372858	0.515891	0.702761	1.06158	1.02151	0.308228	0.8047	0.186023			95.6	0.361711	0.41686	0.887288	1.06129	1.44981	0.647258	1.33866	0.504925		95.6	0.274654	0.546269	0.934878	1.20819	1.43556	0.44524	0.887261	0.389628		95.6	1.40292	1.77569	1.84302	1.65237	1.38416	1.3317	1.14326	0.663239		95.6	1.71297	2.13712	1.97699	2.27533	1.66922	1.1108	0.42848	-0.0568381
95.8	0.376292	0.515196	0.705374	1.06589	1.03174	0.311098	0.805046	0.187378			95.8	0.361665	0.420736	0.890604	1.07033	1.45787	0.650704	1.34882	0.522411		95.8	0.274605	0.546404	0.942073	1.21895	1.44302	0.449114	0.89014	0.387562		95.8	1.40467	1.77727	1.84556	1.65983	1.3833	1.32745	1.14265	0.658375		95.8	1.71339	2.13848	1.97853	2.27611	1.67149	1.11128	0.426049	-0.0571702
96	0.381543	0.523971	0.712108	1.0744	1.03229	0.310811	0.807091	0.186431			96	0.362781	0.422994	0.89377	1.07968	1.46455	0.655312	1.35378	0.5349		96	0.279432	0.546896	0.948221	1.23322	1.44891	0.453695	0.895025	0.386903		96	1.40318	1.77833	1.84644	1.65206	1.384	1.33476	1.14031	0.661921		96	1.71609	2.14047	1.98064	2.27623	1.67201	1.11199	0.426228	-0.056145
96.2	0.382981	0.529298	0.717611	1.08195	1.04132	0.313481	0.805635	0.187737			96.2	0.36608	0.426744	0.899253	1.09005	1.47025	0.657641	1.36231	0.516402		96.2	0.281696	0.550793	0.95497	1.23541	1.45788	0.457159	0.902513	0.388383		96.2	1.4062	1.7779	1.85075	1.65093	1.38574	1.33339	1.13893	0.663738		96.2	1.71833	2.14282	1.98134	2.27728	1.67232	1.11186	0.426634	-0.0557886
96.4	0.384592	0.524987	0.720701	1.09107	1.04374	0.315874	0.806656	0.187403			96.4	0.364622	0.431216	0.90488	1.09911	1.47663	0.660982	1.36882	0.512703		96.4	0.284048	0.555404	0.961749	1.24128	1.46656	0.460029	0.905854	0.389979		96.4	1.40235	1.78175	1.84857	1.65542	1.38924	1.3337	1.14	0.66257		96.4	1.72116	2.14389	1.98195	2.27733	1.6734	1.11242	0.427751	-0.0550449
96.6	0.390682	0.524907	0.723094	1.09944	1.05506	0.320511	0.812619	0.187749			96.6	0.365967	0.432653	0.909231	1.10527	1.4834	0.665811	1.37787	0.534807		96.6	0.284964	0.560127	0.969344	1.25659	1.47233	0.46337	0.906892	0.391817		96.6	1.40844	1.77898	1.84878	1.65665	1.38565	1.33376	1.1408	0.664261		96.6	1.72112	2.14404	1.98027	2.27871	1.67459	1.11337	0.428181	-0.0539908
96.8	0.390281	0.534228	0.732017	1.10349	1.05646	0.321811	0.815191	0.188521			96.8	0.369051	0.434146	0.913638	1.11035	1.49236	0.667156	1.38421	0.538853		96.8	0.287223	0.561177	0.975895	1.26051	1.48081	0.466557	0.910425	0.39571		96.8	1.40592	1.7815	1.84841	1.65624	1.38809	1.33359	1.13693	0.660715		96.8	1.72363	2.14538	1.97824	2.27774	1.67232	1.11262	0.432807	-0.0525452
97	0.389038	0.537605	0.740529	1.10581	1.06733	0.326235	0.821148	0.189059			97	0.371553	0.439611	0.91832	1.11321	1.50098	0.671784	1.38996	0.52088		97	0.2873	0.56501	0.980331	1.26228	1.48824	0.470876	0.915362	0.399202		97	1.41179	1.77878	1.84681	1.65543	1.38891	1.33087	1.13897	0.662609		97	1.72398	2.14502	1.97633	2.2776	1.67325	1.11367	0.433201	-0.0531985
97.2	0.394773	0.53605	0.748321	1.11056	1.07149	0.326683	0.829145	0.189455			97.2	0.371093	0.442796	0.921984	1.11625	1.51071	0.674625	1.39962	0.523561		97.2	0.290908	0.56653	0.984454	1.27585	1.49535	0.475324	0.921505	0.400809		97.2	1.41453	1.78408	1.84806	1.65974	1.38432	1.33861	1.13944	0.663599		97.2	1.72558	2.14463	1.97717	2.27839	1.67397	1.11403	0.434463	-0.0532776
97.4	0.393983	0.536119	0.751495	1.11571	1.07992	0.328527	0.835391	0.191382			97.4	0.373167	0.44397	0.924648	1.12031	1.52048	0.679154	1.40798	0.543832		97.4	0.29233	0.569488	0.990188	1.28865	1.50537	0.479269	0.921245	0.400968		97.4	1.41178	1.78466	1.85084	1.65641	1.38865	1.33145	1.14327	0.667487		97.4	1.72626	2.14581	1.97951	2.27854	1.67385	1.11504	0.437026	-0.0528864
97.6	0.392757	0.544326	0.752007	1.11728	1.08452	0.329601	0.84095	0.194118			97.6	0.376017	0.447058	0.929855	1.12754	1.529	0.682274	1.41327	0.538979		97.6	0.295302	0.575058	0.994555	1.28889	1.51458	0.483768	0.924964	0.402884		97.6	1.41497	1.78596	1.84661	1.65365	1.38577	1.32833	1.14017	0.664488		97.6	1.72975	2.14674	1.98115	2.27938	1.67448	1.11598	0.436618	-0.053631
97.8	0.398123	0.548294	0.75446	1.12438	1.09049	0.332275	0.848926	0.194797			97.8	0.375473	0.450145	0.935476	1.13638	1.53452	0.685303	1.4242	0.523552		97.8	0.297781	0.581736	0.999384	1.298	1.5242	0.488507	0.930036	0.401953		97.8	1.42035	1.78636	1.84941	1.65879	1.38685	1.3314	1.14153	0.665934		97.8	1.72951	2.1473	1.98514	2.27928	1.67506	1.11683	0.436326	-0.0534799
98	0.400668	0.548743	0.76218	1.1294	1.09588	0.333959	0.848633	0.196117			98	0.37628	0.451574	0.939857	1.1471	1.54053	0.689725	1.43031	0.529539		98	0.296413	0.587819	1.00381	1.31272	1.53323	0.491168	0.938923	0.399986		98	1.41936	1.78487	1.84823	1.65903	1.38566	1.32971	1.14277	0.665722		98	1.73144	2.15031	1.98725	2.28008	1.67439	1.11694	0.435437	-0.053185
98.2	0.400002	0.54763	0.767328	1.13578	1.10043	0.337823	0.851492	0.196134			98.2	0.377793	0.455244	0.944503	1.1572	1.54668	0.694697	1.43641	0.551036		98.2	0.295192	0.591411	1.01081	1.32118	1.53986	0.495322	0.941975	0.401364		98.2	1.41839	1.78754	1.85002	1.65774	1.38659	1.33004	1.14187	0.661186		98.2	1.7322	2.15128	1.98753	2.27892	1.67389	1.1165	0.434363	-0.0565074
98.4	0.405456	0.553967	0.770285	1.13947	1.10886	0.341228	0.852475	0.195281			98.4	0.38204	0.458235	0.951577	1.16596	1.55318	0.699538	1.44516	0.546291		98.4	0.298782	0.590504	1.01603	1.32281	1.54685	0.500712	0.947185	0.40213		98.4	1.42125	1.78904	1.85527	1.65655	1.38909	1.33035	1.14123	0.666873		98.4	1.73477	2.15177	1.98783	2.27891	1.67647	1.11677	0.434518	-0.0552027
98.6	0.400385	0.559608	0.775155	1.14992	1.11152	0.343053	0.854016	0.194555			98.6	0.381547	0.461128	0.955928	1.17572	1.55862	0.703469	1.45275	0.533955		98.6	0.302997	0.590868	1.02344	1.33851	1.55527	0.503848	0.955163	0.402543		98.6	1.42172	1.79052	1.8541	1.65908	1.38626	1.33189	1.14089	0.663978		98.6	1.7355	2.1533	1.99022	2.27689	1.67719	1.1164	0.433867	-0.0533525
98.8	0.393879	0.560197	0.778837	1.15494	1.12146	0.346096	0.857005	0.19644			98.8	0.383243	0.465244	0.961041	1.18107	1.56664	0.709106	1.45909	0.542318		98.8	0.306595	0.594121	1.02685	1.3512	1.56168	0.5066	0.961465	0.40572		98.8	1.42274	1.78795	1.85013	1.65415	1.38475	1.32818	1.13882	0.668487		98.8	1.73821	2.15366	1.98682	2.27857	1.6806	1.11716	0.432614	-0.0554721
99	0.394118	0.557996	0.782248	1.16155	1.12515	0.348526	0.863826	0.197383			99	0.384891	0.468496	0.965466	1.18471	1.57307	0.713044	1.46764	0.562179		99	0.306114	0.595242	1.03369	1.35396	1.56956	0.509964	0.965179	0.40867		99	1.42266	1.79175	1.85153	1.657	1.38882	1.32943	1.14167	0.664591		99	1.7379	2.15105	1.98811	2.2788	1.6832	1.11614	0.434324	-0.056232
99.2	0.393433	0.563747	0.786215	1.16381	1.13701	0.349711	0.866539	0.197372			99.2	0.387178	0.469999	0.970314	1.18883	1.57972	0.715645	1.477	0.548834		99.2	0.308161	0.601259	1.0389	1.35861	1.5766	0.51347	0.96854	0.409299		99.2	1.43053	1.78985	1.84884	1.65935	1.38787	1.33038	1.14084	0.660831		99.2	1.73868	2.15299	1.98722	2.28103	1.68659	1.11747	0.433508	-0.053086
99.4	0.391956	0.572107	0.79239	1.16918	1.14004	0.351724	0.87362	0.198466			99.4	0.386303	0.472805	0.973882	1.19372	1.58631	0.715047	1.48519	0.538187		99.4	0.311979	0.608014	1.04542	1.37716	1.58636	0.517535	0.973352	0.410782		99.4	1.42356	1.79218	1.8584	1.66252	1.38834	1.3317	1.14159	0.668542		99.4	1.73954	2.15363	1.9916	2.28181	1.68806	1.11755	0.434028	-0.0542229
99.6	0.396745	0.572592	0.79882	1.17432	1.15254	0.354006	0.881035	0.200166			99.6	0.3875	0.474601	0.977945	1.19841	1.59453	0.717662	1.49176	0.550765		99.6	0.316305	0.611455	1.04848	1.38408	1.5925	0.52176	0.977212	0.410779		99.6	1.42806	1.78983	1.85266	1.66253	1.38675	1.33171	1.14518	0.664191		99.6	1.74008	2.15456	1.98913	2.28323	1.68961	1.11804	0.434992	-0.0534455
99.8	0.402514	0.570063	0.805849	1.17853	1.15544	0.355617	0.884537	0.200048			99.8	0.391073	0.475823	0.981999	1.20696	1.60047	0.718839	1.49952	0.569646		99.8	0.315026	0.612121	1.05791	1.38563	1.59767	0.527275	0.981658	0.409238		99.8	1.43309	1.79042	1.85138	1.66206	1.38206	1.32953	1.14342	0.667565		99.8	1.7408	2.15456	1.99422	2.28287	1.69144	1.11885	0.43735	-0.0524342
100	0.403904	0.57547	0.807392	1.18525	1.16458	0.358388	0.887639	0.201248			100	0.392855	0.479299	0.98789	1.21766	1.60996	0.722744	1.50543	0.553234		100	0.311138	0.616591	1.06402	1.39667	1.60706	0.531865	0.986006	0.409242		100	1.43098	1.79379	1.85796	1.66164	1.38559	1.33124	1.13807	0.669167		100	1.74426	2.1563	1.99345	2.28386	1.69108	1.12069	0.437068	-0.0516737
100.2	0.408395	0.585427	0.810509	1.19591	1.16728	0.361893	0.894283	0.201852			100.2	0.392468	0.482964	0.993451	1.2281	1.61847	0.7255	1.51159	0.548287		100.2	0.311354	0.617314	1.07124	1.40977	1.61646	0.537593	0.987847	0.409297		100.2	1.43059	1.78999	1.85435	1.6608	1.38824	1.33518	1.14006	0.668135		100.2	1.7456	2.15515	1.99338	2.28309	1.69104	1.11984	0.438804	-0.0529082
100.4	0.41016	0.587657	0.816327	1.20473	1.17512	0.364801	0.898075	0.202565			100.4	0.395191	0.485562	0.999429	1.24173	1.6258	0.729789	1.51965	0.565746		100.4	0.316601	0.622206	1.07708	1.41329	1.6244	0.542794	0.992416	0.409606		100.4	1.43332	1.79329	1.85084	1.66167	1.39062	1.32965	1.1372	0.668826		100.4	1.74451	2.15586	1.99074	2.28313	1.68929	1.11848	0.436065	-0.052157
100.6	0.410705	0.58543	0.825015	1.21122	1.18068	0.367435	0.901757	0.202929			100.6	0.39869	0.488186	1.00493	1.24905	1.63353	0.733642	1.52672	0.577957		100.6	0.321165	0.626309	1.08585	1.41667	1.63389	0.548464	0.996578	0.411883		100.6	1.4352	1.79676	1.85544	1.66055	1.38345	1.33441	1.14476	0.667407		100.6	1.74793	2.15712	1.9942	2.28378	1.68966	1.11934	0.435872	-0.0538079
100.8	0.412192	0.589511	0.829692	1.21646	1.18657	0.371896	0.906061	0.203196			100.8	0.397591	0.49267	1.00934	1.25386	1.64034	0.737919	1.53743	0.55849		100.8	0.318775	0.630934	1.09079	1.42997	1.6445	0.553047	1.00227	0.414856		100.8	1.43765	1.79577	1.85471	1.66385	1.39024	1.33399	1.14321	0.669861		100.8	1.74965	2.15658	1.99432	2.28367	1.68883	1.12007	0.433681	-0.0541324
101	0.412971	0.596962	0.834729	1.22308	1.19355	0.37433	0.90841	0.205255			101	0.39831	0.497739	1.01322	1.25744	1.646	0.738808	1.5433	0.556774		101	0.318441	0.63331	1.09787	1.43896	1.65152	0.558121	1.00475	0.418012		101	1.43221	1.79465	1.85485	1.65941	1.38629	1.33266	1.14449	0.663655		101	1.75045	2.15912	1.99612	2.28443	1.68869	1.12154	0.434857	-0.0547928
101.2	0.410529	0.59874	0.839869	1.22801	1.19842	0.377466	0.912297	0.206284			101.2	0.402113	0.500225	1.01806	1.26085	1.65266	0.740642	1.55227	0.577101		101.2	0.321727	0.639991	1.10283	1.44176	1.6604	0.560899	1.00799	0.419734		101.2	1.43869	1.79972	1.85405	1.6619	1.39083	1.33193	1.13895	0.669718		101.2	1.75084	2.16092	1.99982	2.28534	1.6868	1.12182	0.435298	-0.0544211
101.4	0.41201	0.596614	0.844147	1.23253	1.20916	0.379203	0.915041	0.207529			101.4	0.403389	0.502645	1.02238	1.26612	1.66065	0.745083	1.56148	0.582826		101.4	0.328595	0.640961	1.10975	1.44881	1.66871	0.56291	1.0123	0.422257		101.4	1.43847	1.79661	1.85837	1.65963	1.38876	1.32883	1.14282	0.670795		101.4	1.75459	2.1614	2.00048	2.28521	1.68865	1.12257	0.436444	-0.0562298
101.6	0.415475	0.599184	0.847535	1.23728	1.20959	0.382952	0.916919	0.2083			101.6	0.402902	0.506486	1.02738	1.27492	1.66664	0.749536	1.56745	0.563695		101.6	0.333667	0.642587	1.11482	1.4634	1.67588	0.566197	1.0171	0.421915		101.6	1.4392	1.79848	1.85757	1.66324	1.38741	1.33409	1.14622	0.668097		101.6	1.75192	2.16334	2.00081	2.28646	1.68819	1.12347	0.436288	-0.0569167
101.8	0.417558	0.606593	0.851934	1.24357	1.22162	0.383351	0.922463	0.208735			101.8	0.405176	0.509443	1.03441	1.286	1.67431	0.753742	1.57267	0.565806		101.8	0.328792	0.648008	1.12083	1.47084	1.68621	0.570382	1.02214	0.421884		101.8	1.43955	1.79789	1.8576	1.66067	1.38778	1.3325	1.14038	0.673513		101.8	1.75187	2.16559	1.99938	2.2872	1.68831	1.12211	0.436622	-0.0554093
102	0.416728	0.611524	0.855874	1.25289	1.22215	0.387304	0.9278	0.207699			102	0.408049	0.510085	1.03963	1.29748	1.68225	0.757056	1.58153	0.589197		102	0.330105	0.649863	1.12541	1.47416	1.69551	0.573392	1.02563	0.420524		102	1.43836	1.80172	1.8601	1.66242	1.39004	1.33279	1.14129	0.668854		102	1.75177	2.16545	2.00045	2.28736	1.68909	1.12128	0.438187	-0.0539951
102.2	0.419644	0.608398	0.860819	1.26071	1.2329	0.389343	0.930948	0.208898			102.2	0.407614	0.513338	1.04371	1.30827	1.68989	0.763484	1.5883	0.582348		102.2	0.336263	0.652704	1.13337	1.48334	1.70266	0.579612	1.03107	0.420732		102.2	1.4418	1.80054	1.85447	1.66423	1.38856	1.33417	1.14288	0.66806		102.2	1.75377	2.16517	1.9999	2.28892	1.69075	1.1222	0.439581	-0.051934
102.4	0.420441	0.608878	0.865901	1.26913	1.23384	0.393266	0.9348	0.210571			102.4	0.410178	0.517862	1.04869	1.31761	1.6954	0.765779	1.59656	0.562283		102.4	0.343947	0.657074	1.14053	1.49691	1.70921	0.585901	1.03498	0.420184		102.4	1.44297	1.79677	1.85869	1.66426	1.392	1.33447	1.14231	0.669417		102.4	1.75355	2.1669	2.00172	2.28973	1.68897	1.12331	0.440211	-0.0508825
102.6	0.420111	0.617049	0.869517	1.27576	1.24784	0.39385	0.937873	0.210029			102.6	0.413174	0.522051	1.05403	1.32377	1.70501	0.768237	1.60517	0.575366		102.6	0.337803	0.662549	1.14665	1.50167	1.71907	0.589362	1.03934	0.42167		102.6	1.44297	1.80107	1.86149	1.6668	1.3918	1.33744	1.14154	0.666804		102.6	1.75676	2.168	2.00339	2.28947	1.68934	1.12289	0.440261	-0.0511218
102.8	0.415446	0.622657	0.874601	1.28354	1.25061	0.397596	0.94065	0.21084			102.8	0.412816	0.52389	1.05865	1.32719	1.7125	0.768757	1.61471	0.596735		102.8	0.336591	0.666735	1.15253	1.50525	1.7258	0.594084	1.04342	0.423732		102.8	1.44507	1.80365	1.86554	1.66614	1.38974	1.33388	1.14284	0.670312		102.8	1.7575	2.16817	2.00762	2.29097	1.68837	1.124	0.440841	-0.0518962
103	0.41299	0.620823	0.881746	1.28462	1.26131	0.397996	0.943245	0.211439			103	0.412789	0.529206	1.06335	1.33035	1.7186	0.772648	1.6211	0.578488		103	0.342562	0.671215	1.16108	1.51801	1.73523	0.599891	1.04719	0.426922		103	1.44824	1.80403	1.86032	1.66495	1.39004	1.33576	1.14107	0.667434		103	1.75877	2.16953	2.00807	2.29142	1.68842	1.12441	0.439697	-0.0532755
103.2	0.406485	0.620407	0.887664	1.28871	1.26573	0.400842	0.94436	0.211534			103.2	0.417215	0.533246	1.06912	1.33507	1.72552	0.775252	1.62792	0.569529		103.2	0.352757	0.67622	1.1646	1.53222	1.74357	0.602762	1.05002	0.428979		103.2	1.44824	1.80144	1.86096	1.6652	1.39438	1.33729	1.14525	0.670949		103.2	1.75859	2.17038	2.0094	2.28998	1.68664	1.12437	0.438596	-0.0551104
103.4	0.403119	0.625532	0.892739	1.2947	1.27325	0.40164	0.945243	0.212022			103.4	0.416336	0.535994	1.07366	1.34153	1.73265	0.780187	1.63529	0.589864		103.4	0.353415	0.680157	1.17057	1.53697	1.75245	0.60725	1.05609	0.430034		103.4	1.44929	1.80502	1.86372	1.66681	1.39183	1.32901	1.14621	0.669234		103.4	1.76074	2.17078	2.01081	2.29063	1.68832	1.12504	0.43813	-0.0541679
103.6	0.399863	0.631438	0.896489	1.29947	1.27987	0.407078	0.949186	0.214412			103.6	0.41563	0.538208	1.07775	1.35038	1.73624	0.785866	1.64	0.597829		103.6	0.346514	0.684484	1.1781	1.54195	1.7603	0.613864	1.05971	0.431168		103.6	1.44812	1.80152	1.86037	1.66074	1.38671	1.33086	1.14469	0.673375		103.6	1.76146	2.16823	2.00937	2.29063	1.68936	1.12409	0.439077	-0.0531599
103.8	0.400326	0.630714	0.901395	1.30976	1.2845	0.407126	0.955056	0.216432			103.8	0.41962	0.542997	1.08267	1.36084	1.7432	0.791513	1.64763	0.577722		103.8	0.348642	0.689952	1.1841	1.55587	1.76838	0.618664	1.06468	0.430032		103.8	1.45259	1.79924	1.86429	1.6629	1.38727	1.33639	1.14768	0.67057		103.8	1.76307	2.16696	2.00993	2.29118	1.69192	1.12539	0.439629	-0.053532
104	0.397214	0.630651	0.908767	1.31553	1.29303	0.411235	0.960317	0.217823			104	0.420886	0.545001	1.08869	1.37335	1.75104	0.794342	1.65647	0.580775		104	0.359688	0.698345	1.18893	1.56677	1.77616	0.625559	1.06838	0.42949		104	1.45685	1.80511	1.86006	1.66777	1.39031	1.33128	1.14239	0.667548		104	1.76332	2.16732	2.00875	2.29147	1.69189	1.12495	0.438793	-0.053811
104.2	0.396554	0.636111	0.915289	1.32129	1.2958	0.411951	0.967269	0.219173			104.2	0.419816	0.54755	1.09288	1.38486	1.75711	0.795647	1.66508	0.604642		104.2	0.363625	0.703215	1.19637	1.57028	1.78264	0.631502	1.07352	0.429197		104.2	1.45254	1.80498	1.86238	1.66204	1.38922	1.33253	1.14507	0.671747		104.2	1.76617	2.16717	2.00737	2.29267	1.69319	1.12648	0.437982	-0.0531697
104.4	0.394471	0.643776	0.922112	1.32563	1.30719	0.417631	0.9732	0.219512			104.4	0.424217	0.550186	1.09776	1.39439	1.76545	0.795818	1.6751	0.595899		104.4	0.35522	0.706434	1.20184	1.57797	1.79073	0.636054	1.0752	0.430977		104.4	1.45586	1.80085	1.86589	1.66952	1.39231	1.33123	1.14623	0.672772		104.4	1.76632	2.1657	2.0053	2.29191	1.69205	1.1268	0.43815	-0.0528069
104.6	0.394998	0.645391	0.926783	1.33533	1.30957	0.41813	0.977127	0.21948			104.6	0.426776	0.555103	1.10426	1.3988	1.77573	0.797	1.68693	0.580965		104.6	0.355363	0.709001	1.20653	1.59162	1.79651	0.641589	1.08151	0.43192		104.6	1.45451	1.80768	1.86508	1.66591	1.39268	1.33006	1.14661	0.670686		104.6	1.76703	2.16893	2.0074	2.29145	1.68922	1.12715	0.439281	-0.0527293
104.8	0.393769	0.643931	0.931092	1.33884	1.32196	0.424719	0.976042	0.22081			104.8	0.425628	0.556091	1.10877	1.40358	1.78147	0.800273	1.69321	0.599139		104.8	0.366029	0.708521	1.21246	1.60374	1.80489	0.646157	1.08547	0.434401		104.8	1.45763	1.80675	1.86546	1.66407	1.39052	1.33	1.14646	0.669721		104.8	1.76751	2.17164	2.00548	2.29032	1.68777	1.12556	0.439207	-0.0525758
105	0.396866	0.647993	0.935733	1.34888	1.32465	0.425698	0.97612	0.221165			105	0.427959	0.559808	1.11423	1.40733	1.7895	0.801726	1.70164	0.613977		105	0.371734	0.708427	1.21853	1.60709	1.81339	0.650363	1.09184	0.436362		105	1.45665	1.80735	1.86573	1.66879	1.39282	1.33705	1.1441	0.675087		105	1.76939	2.17088	2.00598	2.29084	1.68769	1.12657	0.440075	-0.0533196
105.2	0.400982	0.65631	0.939719	1.35371	1.33719	0.429966	0.978915	0.222955			105.2	0.43007	0.563622	1.11984	1.41257	1.79908	0.807795	1.70866	0.594601		105.2	0.362252	0.710376	1.22671	1.61375	1.82293	0.657154	1.09646	0.438768		105.2	1.45706	1.80587	1.86807	1.66813	1.39034	1.32872	1.1419	0.671601		105.2	1.76991	2.17318	2.0058	2.29055	1.68699	1.12444	0.43978	-0.0544339
105.4	0.403628	0.660074	0.943902	1.35993	1.33966	0.430688	0.98392	0.222777			105.4	0.42806	0.569268	1.12546	1.42037	1.80668	0.812977	1.71492	0.595438		105.4	0.357637	0.715073	1.232	1.62728	1.82992	0.662868	1.10192	0.440766		105.4	1.4596	1.80585	1.86009	1.6669	1.38931	1.33077	1.14588	0.676563		105.4	1.77119	2.17558	2.00762	2.29064	1.68698	1.12366	0.438268	-0.0567605
105.6	0.405331	0.658065	0.953323	1.36568	1.35173	0.435819	0.987403	0.222801			105.6	0.431078	0.571859	1.12862	1.43021	1.81306	0.815108	1.7231	0.621078		105.6	0.368537	0.718902	1.23895	1.63836	1.84062	0.667194	1.10541	0.442276		105.6	1.45994	1.81365	1.86596	1.66584	1.39236	1.33614	1.1426	0.675458		105.6	1.77376	2.17645	2.00751	2.29143	1.68808	1.12597	0.440167	-0.0557046
105.8	0.406244	0.660424	0.961231	1.36983	1.35469	0.434109	0.993318	0.222748			105.8	0.435851	0.575106	1.13409	1.44091	1.82286	0.820922	1.7299	0.612083		105.8	0.377777	0.724646	1.24723	1.6416	1.84785	0.67382	1.11111	0.442873		105.8	1.46272	1.80586	1.86944	1.66373	1.39235	1.33191	1.14382	0.675034		105.8	1.7753	2.17567	2.00831	2.29246	1.68705	1.12634	0.439302	-0.0567591
106	0.411543	0.667343	0.962241	1.37918	1.36449	0.439277	1.00051	0.221983			106	0.436126	0.57659	1.13909	1.4511	1.83136	0.82699	1.73766	0.595236		106	0.368683	0.72951	1.25441	1.64967	1.85377	0.680393	1.11665	0.442971		106	1.46338	1.80635	1.86665	1.66998	1.3906	1.32923	1.13772	0.672258		106	1.77675	2.17747	2.0084	2.29236	1.68839	1.12618	0.439145	-0.0545602
106.2	0.410131	0.672715	0.966808	1.3879	1.37028	0.440181	1.00171	0.222061			106.2	0.437249	0.578516	1.14437	1.45956	1.83935	0.82757	1.7464	0.610339		106.2	0.364114	0.730956	1.26039	1.66228	1.86157	0.688016	1.12246	0.441385		106.2	1.465	1.81038	1.8618	1.66443	1.38858	1.33376	1.1453	0.677945		106.2	1.77822	2.17852	2.01225	2.29304	1.69002	1.12806	0.439252	-0.0549594
106.4	0.413687	0.671713	0.973345	1.3941	1.37822	0.444543	1.00564	0.22408			106.4	0.441533	0.580049	1.14983	1.46526	1.84753	0.829977	1.75347	0.623528		106.4	0.375485	0.736542	1.26792	1.67564	1.87224	0.696049	1.12609	0.441169		106.4	1.46415	1.80734	1.86719	1.66879	1.39146	1.33315	1.14544	0.673068		106.4	1.77911	2.18	2.01281	2.29383	1.68937	1.12924	0.44264	-0.0535525
106.6	0.415917	0.671213	0.976944	1.39952	1.38541	0.443672	1.01061	0.225914			106.6	0.439889	0.583735	1.1551	1.46947	1.85627	0.839853	1.76339	0.603193		106.6	0.385227	0.740542	1.27614	1.67985	1.88179	0.704983	1.13132	0.440986		106.6	1.46487	1.81537	1.86685	1.66314	1.38876	1.3303	1.14612	0.676596		106.6	1.77953	2.17947	2.01294	2.2942	1.69012	1.12864	0.44118	-0.0531791
106.8	0.421915	0.679341	0.981209	1.40831	1.38939	0.450055	1.01167	0.225791			106.8	0.440712	0.587172	1.15916	1.4772	1.86317	0.842299	1.7694	0.603014		106.8	0.373994	0.740912	1.28186	1.6876	1.88996	0.71298	1.1357	0.442676		106.8	1.46462	1.81336	1.87152	1.66553	1.39326	1.33181	1.147	0.677668		106.8	1.78052	2.18169	2.01304	2.29544	1.6908	1.12903	0.442512	-0.0519704
107	0.421437	0.684978	0.989016	1.41338	1.39916	0.450095	1.01467	0.22832			107	0.443766	0.591413	1.16377	1.48698	1.87118	0.846324	1.77873	0.629179		107	0.369311	0.740088	1.28809	1.70032	1.90067	0.718755	1.13812	0.444586		107	1.46488	1.81219	1.86969	1.66877	1.38816	1.33132	1.1424	0.674914		107	1.78051	2.18159	2.01501	2.29491	1.691	1.12878	0.444839	-0.0533896
107.2	0.43042	0.683802	0.994432	1.41853	1.40211	0.455419	1.01736	0.228332			107.2	0.443843	0.594071	1.16629	1.49547	1.87865	0.853541	1.78476	0.624158		107.2	0.38176	0.746163	1.29513	1.71188	1.90907	0.722338	1.14122	0.448731		107.2	1.46733	1.8133	1.86878	1.66918	1.39131	1.32555	1.14095	0.675176		107.2	1.7815	2.18136	2.01284	2.29437	1.68968	1.12968	0.44371	-0.0534079
107.4	0.434055	0.685782	0.999161	1.4264	1.41219	0.457322	1.01946	0.226169			107.4	0.445364	0.597716	1.17193	1.5055	1.88739	0.859885	1.79398	0.608293		107.4	0.393459	0.74526	1.30014	1.71604	1.91517	0.725263	1.14799	0.45076		107.4	1.46635	1.81219	1.86538	1.66525	1.38912	1.33253	1.15011	0.671635		107.4	1.78359	2.18077	2.0125	2.29552	1.69212	1.12965	0.442779	-0.0526505
107.6	0.43751	0.692036	1.00212	1.43485	1.41473	0.463214	1.02318	0.22684			107.6	0.448994	0.599158	1.17665	1.51912	1.89527	0.859845	1.80129	0.624393		107.6	0.38167	0.745791	1.30517	1.72353	1.92172	0.728004	1.15296	0.454379		107.6	1.47027	1.81102	1.86891	1.66658	1.3897	1.32677	1.142	0.673461		107.6	1.78454	2.1815	2.01292	2.29699	1.69227	1.12936	0.44156	-0.0543998
107.8	0.439526	0.697839	1.00723	1.44166	1.42744	0.463694	1.03041	0.227184			107.8	0.448599	0.603891	1.18382	1.5259	1.90362	0.863429	1.80772	0.639555		107.8	0.379827	0.750622	1.31295	1.73781	1.9334	0.730726	1.15729	0.455879		107.8	1.46997	1.81864	1.8701	1.66859	1.39209	1.33187	1.14633	0.674153		107.8	1.78465	2.18216	2.01368	2.29658	1.69411	1.12975	0.442569	-0.0549596
108	0.445683	0.70082	1.01322	1.44992	1.42932	0.468768	1.0344	0.227968			108	0.450091	0.60712	1.19173	1.5283	1.91072	0.86662	1.81832	0.617604		108	0.391826	0.7573	1.32171	1.74862	1.94072	0.735839	1.16285	0.455008		108	1.46796	1.8155	1.86955	1.66666	1.3883	1.33056	1.14256	0.677247		108	1.7863	2.18402	2.01391	2.29696	1.69338	1.13111	0.440055	-0.0550357
108.2	0.446795	0.700436	1.02019	1.45922	1.43884	0.470986	1.04088	0.229788			108.2	0.452615	0.610684	1.20049	1.53482	1.91677	0.867618	1.82423	0.62156		108.2	0.401337	0.762303	1.32672	1.75475	1.94774	0.740726	1.16934	0.454722		108.2	1.47559	1.81708	1.8693	1.66547	1.39292	1.33048	1.14217	0.673383		108.2	1.78677	2.18618	2.01451	2.2986	1.69544	1.13136	0.442356	-0.0536134
108.4	0.44743	0.702767	1.02522	1.46736	1.44277	0.474109	1.04572	0.232156			108.4	0.452372	0.613088	1.20494	1.54299	1.92422	0.867408	1.83318	0.644051		108.4	0.3909	0.767744	1.33578	1.76269	1.95887	0.745605	1.17411	0.454199		108.4	1.47316	1.81137	1.86615	1.66059	1.38919	1.32827	1.14566	0.674682		108.4	1.78638	2.18742	2.01598	2.29913	1.69549	1.13186	0.444122	-0.05321
108.6	0.44759	0.710891	1.03341	1.47346	1.45189	0.475308	1.05218	0.232167			108.6	0.454756	0.617933	1.21173	1.55014	1.93176	0.869605	1.84075	0.636663		108.6	0.387957	0.774002	1.341	1.77499	1.96701	0.751406	1.18072	0.452411		108.6	1.48061	1.81612	1.86877	1.66593	1.38856	1.3339	1.14336	0.671558		108.6	1.78778	2.18706	2.01608	2.29824	1.69613	1.13326	0.445727	-0.0528275
108.8	0.450393	0.714698	1.03942	1.47969	1.45792	0.479281	1.05412	0.23343			108.8	0.457191	0.62059	1.21771	1.55949	1.93968	0.87099	1.84908	0.621085		108.8	0.399294	0.776831	1.34698	1.78513	1.97584	0.756014	1.18433	0.449732		108.8	1.47688	1.81541	1.87038	1.66782	1.39203	1.33428	1.14312	0.67376		108.8	1.79063	2.18726	2.01852	2.29807	1.69559	1.13197	0.4467	-0.0521084
109	0.449144	0.713543	1.04166	1.48615	1.46444	0.481101	1.05749	0.233929			109	0.455994	0.62504	1.22137	1.57201	1.94592	0.873367	1.85729	0.641906		109	0.409532	0.779193	1.35279	1.79325	1.98509	0.759894	1.18852	0.450529		109	1.47277	1.81572	1.87005	1.67304	1.39699	1.32978	1.1444	0.671943		109	1.79043	2.18697	2.01799	2.29923	1.69517	1.13125	0.447177	-0.0512447
109.2	0.446786	0.715311	1.04598	1.49422	1.47424	0.481691	1.06432	0.233693			109.2	0.457466	0.628853	1.22614	1.58146	1.9541	0.875715	1.86201	0.649989		109.2	0.400454	0.780418	1.3604	1.79875	1.99467	0.762864	1.19125	0.451836		109.2	1.47496	1.8176	1.86958	1.66883	1.38967	1.32855	1.14847	0.674312		109.2	1.79156	2.18541	2.02029	2.29835	1.69379	1.13095	0.448285	-0.0514988
109.4	0.447203	0.722569	1.05284	1.50081	1.47948	0.484993	1.06643	0.234683			109.4	0.459961	0.632065	1.23236	1.58765	1.9604	0.880515	1.87078	0.629733		109.4	0.396807	0.78343	1.36596	1.80987	2.00166	0.767034	1.1995	0.453978		109.4	1.47687	1.81702	1.87065	1.66694	1.38753	1.33027	1.1463	0.680183		109.4	1.79158	2.1857	2.02074	2.29851	1.69223	1.13047	0.446999	-0.0531212
109.6	0.449592	0.728867	1.05822	1.50634	1.49049	0.48648	1.06656	0.236343			109.6	0.459002	0.634567	1.23776	1.59229	1.96742	0.885019	1.87873	0.634377		109.6	0.407671	0.785375	1.37391	1.82248	2.00903	0.771408	1.20237	0.457099		109.6	1.47677	1.8204	1.86965	1.67156	1.39064	1.33328	1.14344	0.678355		109.6	1.7924	2.18804	2.02129	2.29814	1.69175	1.12972	0.449053	-0.0526333
109.8	0.446338	0.72869	1.06424	1.51387	1.49389	0.489377	1.07115	0.237117			109.8	0.460406	0.637373	1.24403	1.59816	1.97481	0.891781	1.88485	0.656673		109.8	0.416727	0.790099	1.38073	1.82834	2.01789	0.774792	1.20687	0.462909		109.8	1.48081	1.81614	1.87794	1.66827	1.38965	1.33355	1.14448	0.67538		109.8	1.79286	2.19012	2.02104	2.299	1.69011	1.13255	0.447906	-0.0532255
110	0.448518	0.728132	1.07156	1.51907	1.50401	0.490653	1.07481	0.238844			110	0.464455	0.640693	1.24901	1.60653	1.98229	0.89585	1.89427	0.643198		110	0.404513	0.793823	1.3883	1.83378	2.02561	0.77988	1.20855	0.465991		110	1.47736	1.81965	1.87112	1.66681	1.38742	1.3335	1.14743	0.681224		110	1.79363	2.19194	2.02408	2.298	1.6912	1.13118	0.448308	-0.0517171
110.2	0.451898	0.733593	1.07721	1.52579	1.50743	0.495926	1.07959	0.239876			110.2	0.467397	0.643617	1.25374	1.61462	1.9884	0.901617	1.90326	0.631911		110.2	0.400951	0.794777	1.39407	1.8435	2.03449	0.784834	1.21367	0.467778		110.2	1.48028	1.81849	1.87217	1.67004	1.39141	1.33119	1.14415	0.677533		110.2	1.79187	2.19388	2.0231	2.29924	1.69076	1.13076	0.448743	-0.052367
110.4	0.457724	0.741167	1.08277	1.53291	1.51828	0.498179	1.08241	0.241055			110.4	0.469478	0.646752	1.25992	1.62661	1.99622	0.91224	1.91678	0.656833		110.4	0.412502	0.798072	1.40032	1.85884	2.04158	0.790459	1.21932	0.469597		110.4	1.48282	1.82281	1.86788	1.66838	1.38978	1.32856	1.1429	0.674227		110.4	1.79385	2.19519	2.02402	2.29774	1.69125	1.1327	0.447519	-0.051001
110.6	0.461524	0.740659	1.09111	1.53967	1.52214	0.502335	1.0885	0.240911			110.6	0.473302	0.649583	1.26646	1.63727	2.00406	0.916831	1.9227	0.66276		110.6	0.423438	0.801899	1.40661	1.86756	2.05175	0.795123	1.22423	0.469058		110.6	1.47888	1.81841	1.87267	1.66967	1.3889	1.33271	1.14916	0.677892		110.6	1.7936	2.19488	2.02363	2.2999	1.69094	1.13197	0.445816	-0.0517283
110.8	0.468149	0.740794	1.09228	1.54337	1.53295	0.504288	1.09104	0.241483			110.8	0.472968	0.652742	1.27106	1.64501	2.00938	0.916017	1.93237	0.641238		110.8	0.410099	0.806679	1.4141	1.8737	2.05856	0.801234	1.22826	0.468064		110.8	1.48183	1.81896	1.87165	1.66798	1.38997	1.33138	1.1467	0.675591		110.8	1.79516	2.1942	2.02522	2.29984	1.69181	1.13209	0.446973	-0.0506629
111	0.470065	0.74454	1.09151	1.55316	1.53936	0.509124	1.09469	0.240309			111	0.473152	0.654626	1.27554	1.64945	2.01932	0.922898	1.94169	0.654135		111	0.409312	0.811756	1.42046	1.88322	2.06718	0.804369	1.23454	0.468723		111	1.48236	1.82012	1.87107	1.67025	1.38775	1.33393	1.14599	0.674478		111	1.79636	2.19317	2.02422	2.3014	1.68997	1.13425	0.448577	-0.0519866
111.2	0.471705	0.748606	1.09796	1.55823	1.54512	0.509944	1.0983	0.241588			111.2	0.474855	0.658611	1.28249	1.65615	2.02851	0.926572	1.94833	0.67381		111.2	0.425038	0.818643	1.42592	1.89574	2.07483	0.812137	1.23783	0.468666		111.2	1.48355	1.82019	1.87205	1.6679	1.39352	1.33615	1.14654	0.678721		111.2	1.79962	2.19272	2.02635	2.3013	1.69288	1.13369	0.449267	-0.0508322
111.4	0.470508	0.752355	1.11086	1.56374	1.5525	0.512072	1.10606	0.242004			111.4	0.475078	0.661071	1.2868	1.66543	2.03713	0.928303	1.9555	0.656479		111.4	0.432941	0.820404	1.43317	1.90296	2.08344	0.814694	1.24091	0.468532		111.4	1.48071	1.82511	1.86956	1.66758	1.39164	1.33472	1.14464	0.675608		111.4	1.7991	2.1929	2.027	2.30308	1.69127	1.13293	0.450097	-0.0517883
111.6	0.473678	0.755098	1.11737	1.56987	1.55902	0.515316	1.10739	0.243983			111.6	0.476098	0.664514	1.29256	1.67416	2.04551	0.932034	1.96294	0.648627		111.6	0.418275	0.826473	1.44021	1.90544	2.09143	0.819302	1.24583	0.471232		111.6	1.48271	1.82327	1.87421	1.67045	1.38856	1.32781	1.14053	0.679236		111.6	1.80101	2.19436	2.02913	2.30194	1.69242	1.13315	0.449297	-0.0522448
111.8	0.47271	0.756907	1.11622	1.57999	1.56841	0.518069	1.11449	0.24504			111.8	0.480337	0.669233	1.29974	1.68606	2.05599	0.940348	1.97238	0.675888		111.8	0.421905	0.829202	1.44708	1.91529	2.09868	0.827726	1.24942	0.473692		111.8	1.48691	1.81847	1.87557	1.67114	1.39041	1.3327	1.14851	0.677134		111.8	1.80191	2.19461	2.02857	2.30193	1.693	1.13305	0.447729	-0.0523394
112	0.474272	0.759066	1.12215	1.58403	1.57292	0.519437	1.12007	0.246679			112	0.481273	0.673838	1.30876	1.69783	2.06175	0.944903	1.97684	0.671487		112	0.439294	0.833075	1.45506	1.92813	2.10653	0.831755	1.25367	0.474863		112	1.48758	1.82001	1.87281	1.6702	1.39203	1.32859	1.14446	0.676424		112	1.80359	2.19636	2.02967	2.30184	1.69322	1.13316	0.447419	-0.0520173
112.2	0.475594	0.76728	1.13171	1.59248	1.58517	0.521268	1.12115	0.247195			112.2	0.479915	0.677938	1.31326	1.70571	2.06836	0.951897	1.98573	0.652212		112.2	0.436154	0.835165	1.46376	1.93752	2.11787	0.832921	1.25824	0.476734		112.2	1.49111	1.81813	1.87379	1.66803	1.3873	1.32946	1.14516	0.675973		112.2	1.80367	2.19624	2.02844	2.30179	1.6917	1.13507	0.445592	-0.0545336
112.4	0.477786	0.770272	1.1399	1.60403	1.58823	0.526816	1.12402	0.247448			112.4	0.483857	0.683418	1.31907	1.7107	2.07479	0.953344	1.99714	0.669137		112.4	0.422385	0.840864	1.46937	1.94217	2.12779	0.840504	1.26488	0.480224		112.4	1.49048	1.82392	1.87393	1.66702	1.39192	1.33052	1.15154	0.677491		112.4	1.8052	2.19577	2.02687	2.30278	1.69499	1.1346	0.445196	-0.0526306
112.6	0.476346	0.770898	1.14164	1.6112	1.59891	0.527582	1.12963	0.24825			112.6	0.483627	0.688165	1.32444	1.71673	2.08081	0.956077	2.0017	0.68706		112.6	0.432519	0.841311	1.47683	1.95411	2.1389	0.845607	1.26886	0.480313		112.6	1.4861	1.82518	1.87819	1.67142	1.39247	1.32654	1.1455	0.678272		112.6	1.80457	2.19519	2.02816	2.3025	1.69589	1.13587	0.446166	-0.0525203
112.8	0.476704	0.773126	1.14634	1.61408	1.60083	0.531359	1.13167	0.249816			112.8	0.482491	0.68994	1.32962	1.72514	2.08836	0.957918	2.01059	0.664558		112.8	0.448892	0.845899	1.48413	1.96725	2.14807	0.846901	1.27452	0.480524		112.8	1.49078	1.82575	1.87512	1.66708	1.39041	1.33189	1.14598	0.68059		112.8	1.80377	2.1951	2.02849	2.30129	1.6952	1.13515	0.447242	-0.0522624
113	0.47648	0.782097	1.15405	1.61836	1.6112	0.532946	1.13359	0.251908			113	0.487893	0.692003	1.33382	1.73371	2.09881	0.962139	2.0192	0.666952		113	0.436612	0.852019	1.49105	1.97414	2.1571	0.850974	1.2787	0.48177		113	1.49096	1.82322	1.8748	1.66857	1.38935	1.32984	1.14339	0.68424		113	1.80502	2.19451	2.02899	2.30092	1.69641	1.13548	0.446464	-0.0527247
113.2	0.475454	0.787441	1.16393	1.62222	1.61592	0.538909	1.13746	0.253461			113.2	0.490998	0.694466	1.3416	1.74423	2.10707	0.963586	2.02706	0.691041		113.2	0.431202	0.857936	1.49799	1.98013	2.1656	0.855972	1.2837	0.481632		113.2	1.48432	1.82569	1.87179	1.66999	1.38902	1.3266	1.14427	0.683034		113.2	1.80646	2.19573	2.02797	2.30262	1.69698	1.13436	0.447728	-0.0504606
113.4	0.477032	0.787959	1.16897	1.62634	1.62364	0.538931	1.14243	0.254784			113.4	0.490133	0.699422	1.34942	1.75651	2.11567	0.970284	2.03717	0.679362		113.4	0.449436	0.861606	1.50606	1.9932	2.17694	0.85836	1.28637	0.479735		113.4	1.4915	1.82757	1.8755	1.67362	1.39258	1.33141	1.14637	0.67611		113.4	1.80713	2.19657	2.03068	2.30078	1.69731	1.13504	0.448075	-0.0529577
113.6	0.480746	0.788663	1.17074	1.63299	1.63261	0.544111	1.14733	0.255031			113.6	0.494728	0.702676	1.35458	1.7686	2.12692	0.974288	2.04479	0.664208		113.6	0.454131	0.864672	1.51282	2.00507	2.1852	0.86441	1.29203	0.479504		113.6	1.49206	1.82413	1.8789	1.66697	1.38801	1.33003	1.14568	0.678134		113.6	1.80748	2.19714	2.02834	2.30231	1.69648	1.13382	0.447818	-0.0511377
113.8	0.486973	0.794537	1.17865	1.64197	1.63952	0.545732	1.15284	0.255749			113.8	0.496699	0.705963	1.36143	1.77325	2.13552	0.981976	2.05458	0.687973		113.8	0.437668	0.867412	1.5188	2.01277	2.19708	0.869756	1.29655	0.479464		113.8	1.48763	1.82726	1.87319	1.67401	1.39415	1.33043	1.14665	0.681437		113.8	1.80835	2.19832	2.0278	2.30385	1.69844	1.13399	0.44844	-0.0526035
114	0.490742	0.799557	1.18485	1.64748	1.6499	0.550381	1.15662	0.256574			114	0.494915	0.711487	1.36736	1.776	2.14384	0.982753	2.06098	0.694944		114	0.444719	0.867319	1.52305	2.01864	2.20755	0.87342	1.3029	0.479662		114	1.4921	1.82271	1.87831	1.67187	1.39269	1.33427	1.14516	0.679541		114	1.80865	2.19875	2.02732	2.30528	1.69887	1.13377	0.447538	-0.0523666
114.2	0.495496	0.80046	1.19058	1.65697	1.65437	0.549656	1.16151	0.256038			114.2	0.498386	0.71448	1.37274	1.78227	2.15148	0.989932	2.06974	0.6745		114.2	0.462424	0.871295	1.53022	2.02665	2.21686	0.879815	1.31021	0.481165		114.2	1.49288	1.82723	1.87912	1.67201	1.38929	1.32434	1.14761	0.680695		114.2	1.80762	2.20073	2.03094	2.30343	1.69796	1.13426	0.44526	-0.0534343
114.4	0.495495	0.804194	1.19511	1.66175	1.66673	0.553432	1.16375	0.256944			114.4	0.501192	0.71538	1.37868	1.79084	2.15951	0.988412	2.07608	0.682154		114.4	0.454485	0.87313	1.53802	2.03911	2.22281	0.885474	1.31574	0.483209		114.4	1.49796	1.82807	1.87621	1.66649	1.3909	1.32998	1.15021	0.683402		114.4	1.80814	2.20145	2.02998	2.30545	1.69882	1.13435	0.446097	-0.0515265
114.6	0.495436	0.806831	1.19874	1.67196	1.67236	0.555539	1.16595	0.257155			114.6	0.500662	0.718464	1.38601	1.79897	2.16556	0.994118	2.08423	0.705425		114.6	0.446613	0.879313	1.54483	2.04786	2.22919	0.888623	1.31995	0.485943		114.6	1.49453	1.82466	1.88122	1.67258	1.38788	1.33099	1.1466	0.679842		114.6	1.80791	2.20185	2.03276	2.30566	1.69832	1.13503	0.446124	-0.0521653
114.8	0.492721	0.810251	1.20198	1.68064	1.68266	0.558107	1.16884	0.259227			114.8	0.504761	0.723232	1.39111	1.80931	2.17402	0.993119	2.09563	0.688336		114.8	0.464946	0.885104	1.55262	2.05146	2.23604	0.89336	1.32679	0.488589		114.8	1.4953	1.82582	1.87453	1.66835	1.39485	1.33203	1.14904	0.677666		114.8	1.80816	2.20291	2.03342	2.30554	1.69812	1.13374	0.446417	-0.0496448
115	0.490647	0.814851	1.21127	1.69164	1.68605	0.559963	1.17585	0.25796			115	0.505769	0.724448	1.39692	1.82353	2.18244	0.996172	2.10079	0.678379		115	0.471068	0.890326	1.56061	2.06195	2.24401	0.899564	1.33195	0.490286		115	1.50065	1.82576	1.87981	1.67297	1.39045	1.32952	1.14549	0.680388		115	1.80904	2.20411	2.03688	2.30477	1.6972	1.13238	0.448541	-0.0512537
115.2	0.492299	0.817481	1.2196	1.69654	1.6953	0.562597	1.17898	0.258953			115.2	0.505439	0.727662	1.40158	1.83184	2.18971	0.995362	2.11096	0.700659		115.2	0.454034	0.891583	1.56726	2.07759	2.2522	0.901406	1.33569	0.492651		115.2	1.49565	1.8316	1.87647	1.66971	1.39264	1.33128	1.14606	0.67751		115.2	1.81034	2.20333	2.03663	2.30622	1.69928	1.13125	0.451099	-0.0508011
115.4	0.493896	0.817804	1.22	1.70338	1.70034	0.567653	1.18089	0.259296			115.4	0.509104	0.730138	1.40521	1.83537	2.1995	1.00412	2.11783	0.705644		115.4	0.460257	0.897664	1.57451	2.08565	2.26381	0.905195	1.33919	0.49499		115.4	1.50099	1.82788	1.87843	1.66961	1.38823	1.33139	1.14833	0.677856		115.4	1.81134	2.20343	2.03804	2.30557	1.69705	1.13173	0.451014	-0.0509056
115.6	0.493575	0.821173	1.22514	1.70579	1.70782	0.569448	1.18712	0.259707			115.6	0.509571	0.732203	1.40965	1.84124	2.2079	1.00957	2.12644	0.684636		115.6	0.478097	0.90393	1.58089	2.08934	2.27523	0.908917	1.34364	0.496091		115.6	1.50367	1.83085	1.87946	1.67245	1.39064	1.32985	1.14569	0.679579		115.6	1.81301	2.20493	2.0381	2.30547	1.69899	1.13228	0.450789	-0.0516593
115.8	0.493432	0.828853	1.23289	1.71297	1.71664	0.572636	1.19233	0.259412			115.8	0.510663	0.736364	1.41574	1.85021	2.21625	1.01743	2.13304	0.695848		115.8	0.465683	0.90665	1.58636	2.10119	2.28432	0.912745	1.34908	0.494805		115.8	1.49988	1.82872	1.87989	1.67298	1.3911	1.3299	1.14622	0.67904		115.8	1.81267	2.20507	2.03887	2.3045	1.69797	1.13423	0.450256	-0.0529297
116	0.494947	0.831667	1.24251	1.7169	1.72166	0.574649	1.19464	0.260968			116	0.512941	0.738734	1.42055	1.85814	2.22472	1.02209	2.13938	0.717681		116	0.459659	0.91232	1.5957	2.11453	2.29381	0.918517	1.35501	0.49734		116	1.49859	1.83239	1.87891	1.67289	1.39	1.32996	1.14651	0.684844		116	1.81233	2.20423	2.03744	2.30404	1.69761	1.13689	0.449361	-0.0499393
116.2	0.496338	0.831562	1.24204	1.72257	1.7318	0.579009	1.20075	0.261403			116.2	0.513229	0.744432	1.42792	1.8683	2.23327	1.02773	2.15096	0.700995		116.2	0.480825	0.92036	1.60328	2.1221	2.30299	0.923612	1.3608	0.49773		116.2	1.50181	1.83127	1.87576	1.67319	1.39513	1.3296	1.1472	0.672797		116.2	1.81371	2.20684	2.03832	2.30473	1.6972	1.13842	0.448217	-0.0497124
116.4	0.49945	0.833338	1.24538	1.72871	1.73776	0.58019	1.20619	0.262949			116.4	0.513756	0.749307	1.4347	1.88054	2.2409	1.0343	2.15671	0.694599		116.4	0.480959	0.924361	1.61153	2.12614	2.31095	0.928425	1.36637	0.496907		116.4	1.50181	1.82631	1.87957	1.66819	1.39144	1.32916	1.14576	0.682321		116.4	1.81392	2.20733	2.03721	2.3047	1.69771	1.13879	0.447584	-0.0503661
116.6	0.503909	0.839757	1.25314	1.7371	1.74837	0.585557	1.21144	0.26586			116.6	0.516087	0.753963	1.44163	1.89266	2.24908	1.0356	2.16895	0.720296		116.6	0.464841	0.929262	1.61864	2.13826	2.31806	0.934261	1.37122	0.497373		116.6	1.50372	1.83238	1.88024	1.67313	1.39306	1.32924	1.15262	0.681782		116.6	1.8153	2.20616	2.03851	2.3047	1.69758	1.13927	0.448645	-0.0500104
116.8	0.509849	0.845073	1.26219	1.74309	1.75286	0.587156	1.21716	0.265639			116.8	0.516227	0.755191	1.44607	1.89858	2.2574	1.03825	2.17153	0.719735		116.8	0.479586	0.933605	1.6259	2.15538	2.32801	0.939958	1.37562	0.499339		116.8	1.50207	1.82961	1.87815	1.67251	1.38862	1.32923	1.14304	0.681794		116.8	1.81855	2.20686	2.03698	2.30704	1.69972	1.13846	0.447678	-0.0500889
117	0.513563	0.848195	1.26803	1.75051	1.76254	0.591403	1.22339	0.266191			117	0.517723	0.760308	1.45269	1.90265	2.26395	1.04481	2.18387	0.700087		117	0.491289	0.936035	1.63217	2.16299	2.33622	0.94282	1.38163	0.498323		117	1.50635	1.82985	1.87459	1.67142	1.39261	1.3277	1.14325	0.683655		117	1.81959	2.20926	2.03925	2.30753	1.70124	1.13733	0.447879	-0.0517927
117.2	0.512868	0.849849	1.27026	1.75674	1.76875	0.59503	1.22775	0.268241			117.2	0.521133	0.762217	1.45717	1.90954	2.27053	1.05364	2.18957	0.714444		117.2	0.474627	0.939896	1.63964	2.16861	2.34784	0.949121	1.38614	0.498124		117.2	1.50409	1.83054	1.87765	1.67137	1.39034	1.32724	1.14628	0.676551		117.2	1.81969	2.20745	2.03788	2.30521	1.69986	1.13744	0.447437	-0.0514465
117.4	0.514173	0.852531	1.2768	1.76453	1.77414	0.598882	1.2304	0.268807			117.4	0.522498	0.765127	1.4628	1.91881	2.27675	1.05164	2.19645	0.730454		117.4	0.478609	0.941777	1.64585	2.18048	2.35623	0.952376	1.38967	0.499211		117.4	1.50289	1.83679	1.87782	1.66822	1.3909	1.33286	1.1468	0.67869		117.4	1.8208	2.207	2.03959	2.30603	1.6999	1.13691	0.449824	-0.0510704
117.6	0.514429	0.859237	1.28547	1.77459	1.78343	0.60024	1.23319	0.268433			117.6	0.525003	0.770112	1.46828	1.9278	2.28598	1.05126	2.20657	0.710581		117.6	0.499149	0.944089	1.65369	2.19529	2.36603	0.95484	1.39254	0.500558		117.6	1.50468	1.83054	1.87899	1.67454	1.39186	1.32696	1.14464	0.686038		117.6	1.82069	2.20819	2.0378	2.3072	1.6982	1.13775	0.448302	-0.0505535
117.8	0.513127	0.862609	1.29735	1.78282	1.78839	0.604744	1.23497	0.27088			117.8	0.526353	0.774266	1.47618	1.93952	2.29127	1.05251	2.21344	0.708755		117.8	0.48808	0.947283	1.6645	2.19976	2.37487	0.959014	1.39855	0.502583		117.8	1.50515	1.83095	1.87804	1.67456	1.39474	1.33026	1.14706	0.681863		117.8	1.81808	2.20777	2.04092	2.30642	1.69617	1.13809	0.449584	-0.050603
118	0.513138	0.865299	1.29544	1.79126	1.79867	0.608632	1.23597	0.273172			118	0.527641	0.777925	1.48202	1.9527	2.29935	1.05708	2.22616	0.733626		118	0.479607	0.951266	1.67168	2.20493	2.38367	0.964221	1.4037	0.504446		118	1.5056	1.83509	1.88156	1.67114	1.39007	1.33356	1.14522	0.682307		118	1.82047	2.20614	2.03846	2.3072	1.69789	1.13875	0.452394	-0.049837
118.2	0.515546	0.866533	1.29971	1.80322	1.80266	0.610379	1.23935	0.273619			118.2	0.529877	0.781785	1.48643	1.96053	2.30894	1.05584	2.2296	0.727285		118.2	0.501232	0.950398	1.6795	2.21498	2.39115	0.969263	1.41051	0.50772		118.2	1.50818	1.83397	1.87998	1.67521	1.39241	1.33328	1.14437	0.67913		118.2	1.82217	2.20681	2.03912	2.30949	1.69858	1.13976	0.452976	-0.049533
118.4	0.518377	0.872801	1.30772	1.81255	1.81212	0.614234	1.24519	0.273184			118.4	0.529983	0.784727	1.49285	1.96476	2.31826	1.06148	2.24367	0.711448		118.4	0.502455	0.956037	1.6867	2.23174	2.39923	0.975659	1.41887	0.510694		118.4	1.50496	1.82987	1.88056	1.66849	1.39128	1.33026	1.14936	0.678282		118.4	1.82331	2.20792	2.03686	2.3095	1.69862	1.13894	0.45409	-0.0506346
118.6	0.519478	0.877881	1.3183	1.81595	1.81724	0.616268	1.2491	0.273401			118.6	0.531678	0.788223	1.49774	1.9723	2.32544	1.0681	2.24976	0.732225		118.6	0.486355	0.958175	1.6962	2.23867	2.40611	0.981057	1.42593	0.513659		118.6	1.50833	1.83372	1.87817	1.67311	1.39214	1.33108	1.14837	0.685433		118.6	1.82409	2.20969	2.03875	2.30918	1.69801	1.13767	0.454272	-0.0506413
118.8	0.526418	0.880244	1.32011	1.82483	1.82616	0.620359	1.25313	0.273147			118.8	0.533763	0.791561	1.50287	1.98103	2.33447	1.07557	2.25935	0.742972		118.8	0.502193	0.963393	1.70226	2.24469	2.41523	0.98585	1.42911	0.514215		118.8	1.50416	1.83224	1.88167	1.66785	1.39322	1.33265	1.14836	0.680762		118.8	1.82702	2.20997	2.03665	2.30966	1.69931	1.13748	0.454227	-0.0500338
119	0.532983	0.878571	1.32211	1.83384	1.83348	0.6213	1.2618	0.273095			119	0.535113	0.79484	1.50807	1.98929	2.34375	1.07804	2.26575	0.720882		119	0.513422	0.969455	1.70879	2.25978	2.42313	0.991015	1.4342	0.514211		119	1.50695	1.83458	1.88065	1.67584	1.39166	1.33167	1.14404	0.681151		119	1.82607	2.21071	2.03874	2.31025	1.69687	1.13678	0.451139	-0.0508028
119.2	0.541568	0.881932	1.32783	1.83644	1.83997	0.625414	1.2641	0.275252			119.2	0.536644	0.797652	1.51451	2.00142	2.35273	1.08322	2.27356	0.729393		119.2	0.495563	0.977727	1.71625	2.27294	2.42982	0.996151	1.43738	0.515832		119.2	1.50831	1.83557	1.87979	1.67361	1.38776	1.32602	1.14108	0.682644		119.2	1.82706	2.21105	2.03879	2.30865	1.69803	1.1354	0.450633	-0.0514341
119.4	0.541241	0.888932	1.34037	1.84329	1.84886	0.626181	1.26964	0.277319			119.4	0.538406	0.802677	1.51779	2.01422	2.36117	1.08691	2.284	0.750309		119.4	0.50157	0.983836	1.72343	2.27875	2.43844	0.998829	1.44399	0.515325		119.4	1.50922	1.83377	1.87944	1.67349	1.38923	1.32902	1.14721	0.68313		119.4	1.82572	2.21108	2.04208	2.30878	1.6987	1.13616	0.449678	-0.0505036
119.6	0.540314	0.893589	1.34549	1.85176	1.85489	0.631487	1.27478	0.278089			119.6	0.541515	0.804523	1.52426	2.02396	2.36904	1.09214	2.2884	0.735396		119.6	0.521298	0.987807	1.72807	2.28587	2.44685	1.00187	1.44716	0.514523		119.6	1.50291	1.83202	1.87737	1.67221	1.39233	1.33204	1.1451	0.681865		119.6	1.82718	2.21032	2.04117	2.30872	1.70074	1.13659	0.450889	-0.0517243
119.8	0.541235	0.896005	1.34267	1.8561	1.86485	0.633803	1.28092	0.278168			119.8	0.544272	0.807925	1.53177	2.02768	2.37742	1.09591	2.30061	0.728418		119.8	0.507172	0.99365	1.73359	2.29935	2.45541	1.00704	1.45215	0.51596		119.8	1.5072	1.83635	1.87953	1.66925	1.3902	1.32834	1.14823	0.682998		119.8	1.82783	2.20998	2.04159	2.30813	1.70051	1.13735	0.450836	-0.0524049
120	0.543684	0.899361	1.35028	1.86216	1.86852	0.638979	1.27934	0.279232			120	0.545484	0.812214	1.53884	2.0353	2.38418	1.10319	2.30446	0.755386		120	0.50582	0.997624	1.74208	2.31063	2.46416	1.01567	1.45567	0.517488		120	1.51058	1.83625	1.87903	1.66997	1.39298	1.33009	1.14733	0.68059		120	1.82916	2.21164	2.04193	2.30786	1.7026	1.13957	0.450589	-0.0512287
120.2	0.536995	0.903396	1.36407	1.87102	1.87938	0.64224	1.2844	0.278092			120.2	0.547134	0.815833	1.54653	2.04413	2.39306	1.10636	2.31832	0.752706		120.2	0.526644	1.00227	1.74804	2.31733	2.47448	1.0186	1.46159	0.515968		120.2	1.5119	1.83565	1.88745	1.6735	1.38879	1.32552	1.14943	0.68121		120.2	1.82847	2.213	2.0426	2.30835	1.70348	1.14032	0.454245	-0.0516498
120.4	0.540393	0.906713	1.37011	1.87911	1.88626	0.647384	1.29358	0.279156			120.4	0.549432	0.820052	1.55481	2.0524	2.40026	1.11271	2.32541	0.735108		120.4	0.519487	1.00718	1.75675	2.32369	2.48193	1.02613	1.46767	0.51663		120.4	1.50976	1.83738	1.88268	1.67245	1.39324	1.32558	1.14804	0.682581		120.4	1.83125	2.21284	2.04216	2.30642	1.70381	1.14178	0.453148	-0.0533698
120.6	0.543651	0.911234	1.36578	1.88874	1.89404	0.649003	1.30022	0.28146			120.6	0.547893	0.823625	1.55998	2.06488	2.40922	1.1185	2.33428	0.751628		120.6	0.507949	1.01523	1.76258	2.33736	2.49085	1.03221	1.47395	0.517861		120.6	1.51731	1.8379	1.88069	1.66908	1.38643	1.32654	1.14708	0.686111		120.6	1.83082	2.2123	2.04247	2.30655	1.70327	1.14304	0.453012	-0.0514116
120.8	0.543806	0.914891	1.37773	1.89695	1.90206	0.65172	1.30155	0.281978			120.8	0.549054	0.82677	1.56419	2.07838	2.41692	1.12398	2.34379	0.763974		120.8	0.528563	1.01946	1.76987	2.35093	2.49799	1.03586	1.47824	0.518185		120.8	1.50887	1.83553	1.88129	1.67323	1.39141	1.32976	1.14666	0.6831		120.8	1.8311	2.21489	2.04437	2.30633	1.70455	1.14305	0.453178	-0.0511417
121	0.541076	0.918988	1.39405	1.90549	1.90682	0.653477	1.30901	0.282323			121	0.551422	0.828028	1.56892	2.0847	2.42497	1.12438	2.35129	0.741006		121	0.528575	1.02666	1.77582	2.35529	2.50575	1.03708	1.48432	0.518554		121	1.51182	1.83446	1.88614	1.67358	1.38962	1.33317	1.14827	0.684598		121	1.8303	2.21362	2.04353	2.30634	1.70325	1.14056	0.454707	-0.0507722
121.2	0.543524	0.922365	1.39469	1.91323	1.91741	0.654392	1.31737	0.28449			121.2	0.552039	0.831749	1.57421	2.09061	2.43304	1.13082	2.36099	0.744289		121.2	0.5149	1.03265	1.7844	2.36273	2.51326	1.04295	1.48965	0.519684		121.2	1.51158	1.83601	1.87988	1.67565	1.39035	1.32818	1.14207	0.685456		121.2	1.831	2.21414	2.04593	2.30762	1.70208	1.14188	0.450557	-0.0505363
121.4	0.541485	0.924426	1.3949	1.92048	1.92125	0.657007	1.31839	0.28567			121.4	0.553657	0.83309	1.57939	2.0991	2.44112	1.13342	2.36497	0.767769		121.4	0.531367	1.0355	1.78958	2.37653	2.52589	1.04541	1.49337	0.521731		121.4	1.51179	1.83595	1.88242	1.67003	1.3919	1.32671	1.14378	0.684419		121.4	1.82937	2.21573	2.04574	2.30789	1.7022	1.1405	0.450836	-0.0480419
121.6	0.541693	0.928792	1.40813	1.92686	1.93427	0.659885	1.32071	0.284341			121.6	0.555675	0.836801	1.58551	2.10894	2.44779	1.13744	2.37737	0.755548		121.6	0.540004	1.03702	1.79677	2.38901	2.53516	1.04986	1.49863	0.525824		121.6	1.51367	1.83792	1.87964	1.67485	1.39067	1.33187	1.14506	0.683739		121.6	1.83081	2.21681	2.04699	2.30687	1.70195	1.14047	0.452601	-0.0511028
121.8	0.540559	0.933044	1.42037	1.93417	1.93933	0.663502	1.32692	0.28697			121.8	0.559501	0.84027	1.59124	2.11729	2.45775	1.14076	2.37903	0.74402		121.8	0.523267	1.04071	1.80396	2.39296	2.54614	1.05351	1.50382	0.528571		121.8	1.51418	1.83692	1.88412	1.67148	1.39349	1.32693	1.14773	0.686566		121.8	1.83195	2.21574	2.04763	2.3075	1.7005	1.14026	0.452852	-0.0510029
122	0.54082	0.936048	1.41754	1.9443	1.95014	0.665694	1.33288	0.289422			122	0.560142	0.845081	1.598	2.13045	2.4662	1.14502	2.39031	0.768524		122	0.529785	1.04515	1.81281	2.40076	2.55747	1.05909	1.50898	0.532215		122	1.5127	1.83475	1.88561	1.67227	1.38961	1.32835	1.1449	0.685101		122	1.83271	2.21724	2.04959	2.30708	1.70104	1.14172	0.452578	-0.0510261
122.2	0.542429	0.939559	1.41994	1.95121	1.95609	0.671926	1.33362	0.289043			122.2	0.560418	0.849093	1.60542	2.14202	2.47342	1.1478	2.39538	0.77017		122.2	0.546793	1.04899	1.8207	2.41265	2.5678	1.06151	1.51478	0.53566		122.2	1.5147	1.83554	1.88466	1.67132	1.38788	1.32329	1.14756	0.686134		122.2	1.83191	2.21517	2.04545	2.30615	1.70142	1.14145	0.453196	-0.05011
122.4	0.548128	0.946332	1.42902	1.95766	1.96372	0.674864	1.33472	0.291415			122.4	0.563881	0.853909	1.61119	2.14757	2.48187	1.15257	2.40414	0.750523		122.4	0.534001	1.05698	1.82991	2.42412	2.57751	1.06743	1.52033	0.537137		122.4	1.51524	1.8431	1.88554	1.67533	1.39102	1.32727	1.14753	0.683913		122.4	1.83334	2.21657	2.04662	2.30751	1.70046	1.14187	0.453774	-0.0510103
122.6	0.552665	0.949859	1.44102	1.96574	1.97098	0.679982	1.33927	0.294176			122.6	0.564287	0.856416	1.61773	2.15313	2.49005	1.15706	2.41296	0.764945		122.6	0.531451	1.06651	1.83947	2.43157	2.58783	1.07314	1.52086	0.53668		122.6	1.51736	1.8343	1.88335	1.67404	1.38996	1.33092	1.14466	0.685412		122.6	1.83259	2.21798	2.04696	2.30783	1.70178	1.141	0.454077	-0.0479514
122.8	0.554591	0.950834	1.43859	1.9716	1.97677	0.682818	1.34487	0.295384			122.8	0.564715	0.860589	1.62394	2.16251	2.49617	1.15962	2.42062	0.781371		122.8	0.552528	1.07343	1.84778	2.43826	2.59479	1.07976	1.52575	0.536718		122.8	1.5181	1.83407	1.88421	1.67496	1.38933	1.32544	1.14598	0.683304		122.8	1.83218	2.21931	2.04652	2.30918	1.70166	1.14197	0.453669	-0.0482979
123	0.556045	0.955566	1.44138	1.97877	1.98764	0.68742	1.34986	0.296171			123	0.567953	0.863898	1.62867	2.17123	2.50418	1.16566	2.43166	0.760723		123	0.545887	1.07454	1.85563	2.4504	2.6024	1.08346	1.53052	0.536134		123	1.51565	1.8395	1.88461	1.67422	1.39295	1.32691	1.14687	0.684728		123	1.83237	2.21925	2.0454	2.31096	1.70348	1.14171	0.454227	-0.0479446
123.2	0.559216	0.961019	1.45615	1.9837	1.99252	0.68814	1.35758	0.298304			123.2	0.571149	0.866487	1.63497	2.17791	2.51242	1.16983	2.43702	0.763553		123.2	0.532474	1.07928	1.86258	2.46246	2.61057	1.08964	1.5341	0.535576		123.2	1.51616	1.8405	1.88325	1.66978	1.38969	1.32976	1.14707	0.682411		123.2	1.83529	2.22073	2.04805	2.31235	1.70263	1.14086	0.45598	-0.0483425
123.4	0.560176	0.963588	1.47018	1.98912	2.00315	0.690653	1.36617	0.298504			123.4	0.573444	0.869973	1.64167	2.19028	2.51953	1.17289	2.45214	0.78551		123.4	0.550071	1.08	1.86767	2.47017	2.6177	1.09625	1.53659	0.536707		123.4	1.51781	1.83728	1.89053	1.66843	1.39217	1.32526	1.142	0.681414		123.4	1.83533	2.21976	2.04772	2.31152	1.70355	1.14285	0.453755	-0.0466876
123.6	0.562854	0.967336	1.46777	1.99402	2.0109	0.692631	1.36914	0.29879			123.6	0.576956	0.873943	1.64749	2.19985	2.52903	1.17754	2.458	0.774552		123.6	0.556725	1.07818	1.87585	2.47586	2.62448	1.10121	1.54339	0.536066		123.6	1.51864	1.83577	1.88616	1.67419	1.38961	1.32796	1.14888	0.683417		123.6	1.83676	2.22198	2.04755	2.31264	1.70372	1.14301	0.451543	-0.0482681
123.8	0.566421	0.971853	1.47029	2.00121	2.01852	0.693937	1.37376	0.298829			123.8	0.576364	0.879195	1.65381	2.20472	2.53865	1.18343	2.46928	0.766621		123.8	0.539567	1.07849	1.88211	2.48786	2.63353	1.10394	1.54776	0.537459		123.8	1.51708	1.83637	1.88707	1.67102	1.39275	1.3314	1.14398	0.682315		123.8	1.83724	2.22123	2.04656	2.31253	1.70504	1.14297	0.452635	-0.0470578
124	0.571508	0.974122	1.48203	2.00323	2.02579	0.696737	1.37681	0.298567			124	0.579078	0.884039	1.65915	2.21283	2.5468	1.18668	2.47611	0.792209		124	0.553665	1.08086	1.88844	2.5011	2.64228	1.10791	1.55248	0.538199		124	1.52131	1.83939	1.88613	1.67406	1.39078	1.32796	1.14804	0.677115		124	1.83747	2.22076	2.0461	2.31018	1.70389	1.14248	0.4504	-0.0491143
124.2	0.571538	0.978225	1.49086	2.01022	2.03156	0.70053	1.3797	0.29949			124.2	0.580286	0.887726	1.66475	2.22372	2.55255	1.1903	2.48519	0.78785		124.2	0.566667	1.0796	1.89394	2.50814	2.65153	1.11463	1.5605	0.539854		124.2	1.52042	1.84443	1.88694	1.67263	1.39479	1.33026	1.14664	0.680077		124.2	1.83732	2.22228	2.04736	2.30988	1.70441	1.14196	0.450442	-0.0480567
124.4	0.575848	0.983987	1.489	2.02293	2.0409	0.705196	1.38199	0.298489			124.4	0.582043	0.889951	1.66938	2.23301	2.56094	1.19445	2.49569	0.77271		124.4	0.551842	1.08474	1.90327	2.51518	2.66026	1.11866	1.56706	0.540419		124.4	1.51776	1.84106	1.88667	1.67236	1.38991	1.32382	1.14483	0.68463		124.4	1.83681	2.22344	2.04803	2.31108	1.70483	1.13954	0.451167	-0.0486177
124.6	0.575282	0.985559	1.49146	2.03108	2.04669	0.707903	1.38754	0.29914			124.6	0.584189	0.893785	1.67461	2.24604	2.56733	1.19861	2.49977	0.79449		124.6	0.553865	1.08946	1.90999	2.52729	2.66797	1.12268	1.56998	0.543038		124.6	1.52024	1.84077	1.88431	1.67088	1.39183	1.32618	1.14406	0.68795		124.6	1.83773	2.22043	2.04931	2.31036	1.70494	1.14122	0.452481	-0.048224
124.8	0.578913	0.986643	1.50275	2.0384	2.05715	0.7122	1.38938	0.299657			124.8	0.588011	0.896814	1.67999	2.25829	2.5747	1.204	2.51069	0.799324		124.8	0.574955	1.09261	1.91885	2.5411	2.67662	1.13036	1.57317	0.544061		124.8	1.51906	1.84207	1.8865	1.66978	1.39089	1.32688	1.14546	0.684345		124.8	1.8372	2.22132	2.05163	2.3104	1.70442	1.14033	0.452433	-0.049423
125	0.578278	0.988222	1.51565	2.04492	2.0635	0.713837	1.39079	0.301003			125	0.589496	0.900317	1.68684	2.26271	2.58151	1.20741	2.515	0.778403		125	0.562864	1.09922	1.92791	2.54848	2.68666	1.13699	1.57963	0.545723		125	1.51832	1.84016	1.89276	1.67041	1.39092	1.33174	1.1405	0.6853		125	1.83907	2.22361	2.05445	2.31126	1.70533	1.14145	0.453924	-0.0480221
125.2	0.580809	0.99315	1.51415	2.05816	2.07184	0.718827	1.3944	0.302341			125.2	0.591031	0.902176	1.69241	2.2708	2.59077	1.21326	2.52836	0.793371		125.2	0.560658	1.1043	1.93833	2.55353	2.69486	1.13895	1.58387	0.547647		125.2	1.51836	1.8389	1.88453	1.67872	1.3908	1.32462	1.14748	0.684271		125.2	1.83966	2.22378	2.05456	2.31248	1.7056	1.14188	0.452687	-0.0497155
125.4	0.578413	0.99736	1.51753	2.06323	2.08043	0.719737	1.39799	0.305186			125.4	0.591226	0.905307	1.69992	2.28118	2.59998	1.21997	2.53189	0.807861		125.4	0.58208	1.10513	1.94666	2.5639	2.69886	1.14245	1.58973	0.550411		125.4	1.5209	1.83867	1.88513	1.6754	1.39336	1.32617	1.14361	0.684583		125.4	1.84147	2.22282	2.05451	2.31257	1.70583	1.14261	0.452573	-0.0511405
125.6	0.580676	1.00154	1.52958	2.07244	2.08789	0.726517	1.40437	0.305883			125.6	0.593457	0.909533	1.70675	2.29035	2.60865	1.22133	2.54297	0.788833		125.6	0.577326	1.10913	1.95448	2.57848	2.70585	1.14809	1.59537	0.551141		125.6	1.52043	1.84184	1.88479	1.67255	1.38991	1.32601	1.14278	0.689369		125.6	1.84244	2.22469	2.05372	2.31402	1.70567	1.14268	0.451166	-0.0507947
125.8	0.582034	1.00501	1.54426	2.07967	2.0974	0.728005	1.40873	0.307223			125.8	0.592358	0.912225	1.71327	2.29934	2.61925	1.22415	2.55199	0.795031		125.8	0.563577	1.1139	1.96154	2.58448	2.71239	1.15192	1.5998	0.552957		125.8	1.5237	1.84133	1.88345	1.67335	1.38866	1.32916	1.14282	0.683756		125.8	1.84334	2.22461	2.05375	2.3142	1.70462	1.14382	0.449029	-0.0480125
126	0.582905	1.01069	1.54184	2.09318	2.10299	0.733564	1.41463	0.308132			126	0.594464	0.915215	1.72061	2.31133	2.62888	1.23077	2.55878	0.817764		126	0.58344	1.1126	1.9679	2.58972	2.72004	1.15507	1.60318	0.554529		126	1.5216	1.84464	1.88213	1.67146	1.39336	1.32883	1.14307	0.691109		126	1.84313	2.22576	2.05248	2.31574	1.70421	1.14424	0.449358	-0.0484573
126.2	0.584253	1.01597	1.54398	2.0965	2.11292	0.734408	1.41728	0.307255			126.2	0.596743	0.92057	1.72864	2.31693	2.63814	1.23401	2.56763	0.803562		126.2	0.588505	1.11721	1.97399	2.60082	2.72836	1.15975	1.61035	0.556012		126.2	1.52335	1.84013	1.88859	1.67795	1.39152	1.327	1.14822	0.689411		126.2	1.84434	2.225	2.0533	2.31395	1.70532	1.14463	0.449521	-0.0459025
126.4	0.584234	1.01958	1.55315	2.10303	2.11935	0.739115	1.42239	0.30824			126.4	0.599402	0.926448	1.73517	2.32139	2.64585	1.23907	2.57283	0.798443		126.4	0.570684	1.12116	1.98011	2.61422	2.74126	1.16506	1.61733	0.556045		126.4	1.52664	1.84269	1.88623	1.67624	1.38991	1.32607	1.14782	0.691437		126.4	1.84588	2.22608	2.05403	2.31515	1.70689	1.14412	0.450787	-0.045936
126.6	0.583957	1.02309	1.56464	2.10806	2.12683	0.740538	1.4216	0.310046			126.6	0.600788	0.929626	1.74155	2.33082	2.65488	1.24307	2.58577	0.823511		126.6	0.58241	1.12555	1.98921	2.62212	2.75308	1.17028	1.62473	0.559888		126.6	1.52597	1.84077	1.88349	1.67453	1.39426	1.33036	1.141	0.68245		126.6	1.84484	2.22585	2.05496	2.31537	1.70547	1.14267	0.451418	-0.0461325
126.8	0.581856	1.02533	1.56309	2.1139	2.13513	0.746558	1.43044	0.310718			126.8	0.603989	0.934349	1.74899	2.34005	2.66123	1.24811	2.58836	0.813506		126.8	0.597696	1.12806	1.99663	2.63004	2.7616	1.1765	1.63209	0.560693		126.8	1.52229	1.83713	1.88721	1.67334	1.3899	1.33449	1.13998	0.681807		126.8	1.84612	2.22747	2.05339	2.31392	1.70711	1.14294	0.454874	-0.0495697
127	0.58559	1.02759	1.56669	2.1196	2.14062	0.749125	1.43517	0.312135			127	0.60628	0.936339	1.75534	2.35048	2.66849	1.25129	2.60211	0.799522		127	0.582131	1.13835	2.00215	2.63945	2.77277	1.18393	1.63659	0.562272		127	1.52654	1.84301	1.87855	1.67101	1.39001	1.33097	1.1503	0.685111		127	1.84748	2.22656	2.05481	2.31368	1.70552	1.14302	0.453723	-0.0488136
127.2	0.584636	1.03011	1.5786	2.12905	2.15003	0.753367	1.43779	0.314341			127.2	0.608247	0.94102	1.75967	2.36389	2.67474	1.25558	2.6046	0.825661		127.2	0.583119	1.14557	2.0109	2.65192	2.78406	1.19041	1.64111	0.56248		127.2	1.52606	1.84103	1.88522	1.67057	1.39388	1.3305	1.14615	0.686855		127.2	1.84786	2.22634	2.05268	2.31514	1.7046	1.1437	0.455975	-0.0505418
127.4	0.58787	1.0339	1.59511	2.13683	2.15619	0.757273	1.4448	0.314379			127.4	0.608807	0.944016	1.76722	2.37468	2.68072	1.26146	2.61872	0.826762		127.4	0.604581	1.15378	2.01943	2.66256	2.79165	1.19593	1.64866	0.563402		127.4	1.52901	1.84173	1.8888	1.67472	1.39178	1.32388	1.14521	0.686094		127.4	1.84663	2.22752	2.05292	2.31504	1.70261	1.14466	0.456692	-0.0491842
127.6	0.594886	1.03886	1.59553	2.1451	2.16664	0.75855	1.45193	0.316648			127.6	0.612102	0.948566	1.77364	2.38061	2.68593	1.26732	2.62518	0.80499		127.6	0.595094	1.15905	2.02543	2.67033	2.80011	1.20177	1.65591	0.561449		127.6	1.52968	1.84726	1.88496	1.67381	1.39056	1.32736	1.1397	0.686523		127.6	1.84709	2.22803	2.05003	2.31519	1.704	1.14525	0.456852	-0.0490644
127.8	0.59461	1.04299	1.59583	2.15364	2.17288	0.763794	1.45427	0.316888			127.8	0.613796	0.9485	1.77948	2.38795	2.69219	1.27494	2.63372	0.82783		127.8	0.588927	1.16297	2.03346	2.677	2.81004	1.20343	1.66189	0.561373		127.8	1.52675	1.84197	1.88831	1.67063	1.39161	1.32663	1.14884	0.688647		127.8	1.84731	2.22767	2.05292	2.31645	1.70484	1.14399	0.455397	-0.0470421
128	0.593491	1.04703	1.60461	2.16215	2.18177	0.76678	1.45703	0.316701			128	0.614887	0.951702	1.78522	2.39738	2.69957	1.28107	2.64198	0.838754		128	0.610347	1.16565	2.04124	2.68956	2.81761	1.2084	1.66813	0.561241		128	1.52802	1.84137	1.88562	1.67309	1.39243	1.32568	1.14732	0.681935		128	1.84755	2.22831	2.05247	2.31539	1.70491	1.14256	0.457161	-0.0484275
128.2	0.598668	1.05385	1.61652	2.1697	2.19018	0.771022	1.46522	0.318133			128.2	0.617258	0.956851	1.79181	2.40666	2.709	1.28828	2.64907	0.815655		128.2	0.604327	1.17129	2.04832	2.70187	2.8237	1.21354	1.67283	0.562874		128.2	1.52951	1.84045	1.8839	1.67564	1.38939	1.3256	1.14326	0.688513		128.2	1.84634	2.22957	2.05261	2.3152	1.70602	1.1426	0.455801	-0.0475878
128.4	0.597749	1.05841	1.61401	2.17802	2.19636	0.772617	1.4656	0.319602			128.4	0.619306	0.960931	1.79843	2.41805	2.71754	1.29161	2.65964	0.82684		128.4	0.592203	1.1721	2.05682	2.70854	2.83144	1.21914	1.68091	0.5627		128.4	1.52411	1.84046	1.89008	1.67409	1.39111	1.32632	1.14542	0.684926		128.4	1.8486	2.22915	2.05235	2.31477	1.70512	1.14426	0.455573	-0.0491251
128.6	0.596002	1.06119	1.61495	2.18451	2.20544	0.779077	1.46634	0.319035			128.6	0.620038	0.962466	1.8032	2.43115	2.72693	1.29694	2.66335	0.849067		128.6	0.612148	1.17563	2.06554	2.71659	2.84086	1.22117	1.68451	0.56421		128.6	1.53049	1.84479	1.8918	1.67197	1.39065	1.32496	1.14284	0.687573		128.6	1.84951	2.22908	2.05454	2.31326	1.70868	1.14345	0.45595	-0.0486791
128.8	0.599221	1.06367	1.62652	2.19205	2.21297	0.778114	1.47042	0.320402			128.8	0.621411	0.968586	1.80965	2.43837	2.73701	1.29958	2.67737	0.827736		128.8	0.611263	1.18162	2.07482	2.72753	2.8485	1.2282	1.68788	0.56581		128.8	1.52635	1.84438	1.88629	1.67406	1.38903	1.32681	1.14442	0.687807		128.8	1.84979	2.22896	2.05253	2.31374	1.70838	1.14438	0.456668	-0.0503201
129	0.601593	1.06942	1.64071	2.19731	2.22057	0.781316	1.47217	0.32266			129	0.622395	0.974028	1.81582	2.44401	2.74627	1.30354	2.68061	0.826032		129	0.5967	1.18501	2.08498	2.74048	2.85521	1.23077	1.69234	0.566828		129	1.52962	1.84831	1.88965	1.6701	1.3957	1.32289	1.14776	0.688065		129	1.84919	2.22847	2.05264	2.31474	1.71155	1.14698	0.455188	-0.049083
129.2	0.604283	1.07417	1.63774	2.20104	2.22888	0.783625	1.47583	0.322585			129.2	0.623328	0.975159	1.82248	2.45129	2.75304	1.30763	2.69519	0.849611		129.2	0.61571	1.1871	2.09425	2.74915	2.86327	1.23631	1.69735	0.567251		129.2	1.53312	1.84514	1.88921	1.67061	1.3881	1.32459	1.14362	0.686826		129.2	1.85044	2.22862	2.05293	2.31446	1.71108	1.14792	0.45594	-0.0500551
129.4	0.607892	1.07701	1.64049	2.20898	2.23538	0.78872	1.47974	0.323774			129.4	0.625198	0.978406	1.82745	2.45859	2.76289	1.31234	2.6988	0.83429		129.4	0.622262	1.19095	2.10183	2.75615	2.87267	1.24014	1.70243	0.569543		129.4	1.53201	1.84741	1.88854	1.66901	1.39071	1.32689	1.14208	0.685195		129.4	1.84989	2.22911	2.05171	2.31446	1.71356	1.14837	0.456162	-0.0483523
129.6	0.608507	1.07975	1.65459	2.2142	2.24468	0.791521	1.49135	0.324936			129.6	0.626789	0.982738	1.83486	2.4698	2.77159	1.31888	2.71288	0.824638		129.6	0.606758	1.19441	2.10926	2.7681	2.87931	1.24501	1.70904	0.570685		129.6	1.5307	1.84468	1.88739	1.66953	1.38666	1.32345	1.14115	0.685703		129.6	1.84939	2.22882	2.05206	2.31693	1.7107	1.14943	0.455872	-0.0502337
129.8	0.608606	1.08423	1.66441	2.22161	2.24968	0.796045	1.49448	0.327256			129.8	0.629159	0.985816	1.84039	2.48188	2.77812	1.32563	2.7187	0.851343		129.8	0.622824	1.20027	2.11678	2.78234	2.88804	1.2505	1.71602	0.571063		129.8	1.53064	1.84055	1.88492	1.67076	1.38905	1.3259	1.14352	0.687931		129.8	1.85065	2.22786	2.05331	2.31583	1.70887	1.14921	0.45432	-0.0508485
130	0.611997	1.08844	1.66118	2.23023	2.25998	0.799491	1.50273	0.327992			130	0.629324	0.990168	1.84761	2.4917	2.78957	1.33583	2.72857	0.846019		130	0.630832	1.2082	2.12519	2.79016	2.8994	1.25539	1.72187	0.57179		130	1.52945	1.84508	1.88687	1.67021	1.38987	1.32831	1.14528	0.686984		130	1.85011	2.22888	2.0544	2.31552	1.70645	1.14818	0.45437	-0.0501661
130.2	0.607726	1.09032	1.66711	2.23651	2.26592	0.802373	1.50736	0.329075			130.2	0.632117	0.996337	1.85474	2.49828	2.79747	1.34027	2.73461	0.833434		130.2	0.615711	1.21266	2.1338	2.79707	2.90911	1.25927	1.72603	0.573989		130.2	1.53516	1.84268	1.88752	1.6754	1.3851	1.32597	1.14207	0.686338		130.2	1.85058	2.22954	2.05691	2.31551	1.70702	1.1477	0.453541	-0.0493922
130.4	0.605491	1.09381	1.68603	2.24408	2.27351	0.807068	1.51111	0.329747			130.4	0.63473	0.998815	1.86102	2.5061	2.80426	1.34351	2.74097	0.859127		130.4	0.626178	1.21848	2.14154	2.80587	2.91745	1.2667	1.73192	0.576638		130.4	1.53577	1.84576	1.88422	1.67589	1.38915	1.32711	1.14495	0.687093		130.4	1.85039	2.22934	2.05938	2.31487	1.70568	1.14635	0.452507	-0.0489386
130.6	0.607857	1.09475	1.69181	2.25353	2.28317	0.808606	1.51492	0.331372			130.6	0.636116	1.00363	1.86684	2.51537	2.81212	1.34789	2.75189	0.85905		130.6	0.637549	1.22655	2.1477	2.81885	2.92936	1.27345	1.73877	0.579247		130.6	1.53127	1.84856	1.88452	1.67725	1.38924	1.32417	1.14698	0.69092		130.6	1.85233	2.23084	2.06029	2.31365	1.70575	1.14525	0.453669	-0.0473547
130.8	0.613003	1.09812	1.68793	2.26058	2.28953	0.813393	1.51894	0.332093			130.8	0.638755	1.00904	1.87518	2.52522	2.82018	1.35367	2.75644	0.841383		130.8	0.622245	1.23348	2.15488	2.82928	2.93806	1.27712	1.74417	0.582034		130.8	1.53179	1.84326	1.88527	1.66931	1.39165	1.32467	1.14581	0.688811		130.8	1.85311	2.23098	2.06073	2.31526	1.70594	1.14672	0.454484	-0.0460411
131	0.615913	1.10484	1.69827	2.26905	2.29838	0.816233	1.52253	0.333045			131	0.642164	1.01314	1.88046	2.53752	2.82616	1.35319	2.76939	0.864748		131	0.628734	1.23737	2.16084	2.83641	2.94454	1.28283	1.74941	0.585079		131	1.532	1.84681	1.89043	1.67061	1.38872	1.32694	1.14324	0.689952		131	1.85556	2.23112	2.05988	2.31593	1.70587	1.14699	0.455039	-0.0480785
131.2	0.620453	1.11144	1.71465	2.28133	2.30485	0.820346	1.51967	0.333227			131.2	0.644187	1.01649	1.88432	2.54823	2.83541	1.35868	2.7745	0.867362		131.2	0.641331	1.24375	2.16646	2.84276	2.95225	1.28853	1.75108	0.586213		131.2	1.53562	1.84849	1.88859	1.67328	1.3909	1.32975	1.14388	0.688589		131.2	1.85528	2.2307	2.05943	2.31654	1.70491	1.14592	0.454505	-0.0475076
131.4	0.625373	1.11335	1.71222	2.28742	2.31255	0.822032	1.52416	0.334065			131.4	0.645426	1.02154	1.89166	2.55509	2.8437	1.36566	2.7883	0.848729		131.4	0.628219	1.25286	2.17202	2.85393	2.95971	1.29368	1.75475	0.58656		131.4	1.53299	1.84305	1.88614	1.67678	1.38871	1.32929	1.14307	0.690724		131.4	1.85537	2.23088	2.05786	2.31759	1.7045	1.14537	0.454919	-0.0487847
131.6	0.624143	1.11602	1.71067	2.29583	2.32136	0.827657	1.52462	0.335439			131.6	0.647216	1.02427	1.89808	2.56342	2.85101	1.36952	2.79238	0.866647		131.6	0.635479	1.25942	2.18145	2.86583	2.96755	1.29869	1.75994	0.588181		131.6	1.53319	1.84619	1.89063	1.66996	1.39244	1.32776	1.14435	0.689589		131.6	1.85639	2.23124	2.05786	2.31797	1.70495	1.14654	0.453653	-0.0475551
131.8	0.624631	1.12148	1.72755	2.30411	2.32728	0.828504	1.52759	0.335902			131.8	0.649163	1.02743	1.90147	2.57347	2.8587	1.37401	2.80355	0.874824		131.8	0.650204	1.26493	2.1898	2.87235	2.97888	1.30591	1.76438	0.590964		131.8	1.53235	1.85105	1.88616	1.67167	1.3889	1.32253	1.14082	0.68799		131.8	1.85619	2.23206	2.0566	2.3166	1.7065	1.14568	0.455579	-0.0460601
132	0.623228	1.12905	1.73609	2.31081	2.33651	0.833004	1.53287	0.336355			132	0.649619	1.03061	1.90722	2.58134	2.86699	1.38144	2.8083	0.85279		132	0.638053	1.26976	2.19971	2.88038	2.99089	1.31077	1.7675	0.593194		132	1.53351	1.84655	1.88992	1.67137	1.38619	1.32907	1.14619	0.689501		132	1.85559	2.23184	2.05586	2.31479	1.70813	1.14658	0.456491	-0.0452817
132.2	0.623951	1.13218	1.7316	2.31723	2.34398	0.835087	1.54305	0.337382			132.2	0.65109	1.03335	1.91468	2.59292	2.87583	1.38615	2.81763	0.868187		132.2	0.644172	1.27368	2.21099	2.8915	2.99872	1.31489	1.77344	0.593211		132.2	1.53536	1.84567	1.88878	1.67153	1.38875	1.32576	1.1405	0.686778		132.2	1.85732	2.2316	2.05511	2.31308	1.70781	1.14793	0.457661	-0.0456371
132.4	0.624351	1.1319	1.73648	2.3226	2.35382	0.838185	1.54778	0.338592			132.4	0.653259	1.03627	1.91902	2.60378	2.88279	1.39168	2.8237	0.880828		132.4	0.65567	1.27383	2.2204	2.90462	3.00484	1.31824	1.78064	0.593757		132.4	1.53705	1.84876	1.88878	1.67247	1.38982	1.32364	1.14162	0.682834		132.4	1.85793	2.23247	2.05602	2.31427	1.70856	1.14819	0.455941	-0.0443509
132.6	0.630562	1.13562	1.75381	2.3281	2.35896	0.841696	1.55261	0.338318			132.6	0.654549	1.04125	1.9267	2.61208	2.89153	1.397	2.83159	0.862904		132.6	0.643195	1.27425	2.22784	2.91366	3.0131	1.32298	1.78587	0.596951		132.6	1.53541	1.84811	1.88736	1.67193	1.38755	1.3243	1.13824	0.690714		132.6	1.85736	2.2314	2.05639	2.3135	1.70851	1.14821	0.456302	-0.0459684
132.8	0.631934	1.14399	1.75806	2.33533	2.37092	0.84663	1.55746	0.339302			132.8	0.656045	1.04631	1.936	2.61631	2.90163	1.39727	2.84353	0.872017		132.8	0.64531	1.27346	2.23516	2.92175	3.02122	1.32554	1.7927	0.597012		132.8	1.53819	1.84784	1.89019	1.67173	1.39384	1.32079	1.1459	0.692371		132.8	1.85776	2.2311	2.05761	2.31381	1.70814	1.14847	0.45483	-0.0478241
133	0.636678	1.1465	1.75473	2.34361	2.3764	0.84917	1.56167	0.340624			133	0.65836	1.04984	1.94284	2.62555	2.91075	1.40001	2.8475	0.891188		133	0.662758	1.27537	2.2382	2.93115	3.02889	1.33149	1.79924	0.596258		133	1.53501	1.85101	1.88791	1.67332	1.38535	1.32209	1.14427	0.688529		133	1.85891	2.23249	2.05995	2.3139	1.70941	1.14758	0.454361	-0.0461219
133.2	0.641914	1.1471	1.76323	2.34959	2.38366	0.852181	1.56395	0.343624			133.2	0.661203	1.05381	1.95003	2.63528	2.92026	1.40364	2.85937	0.874806		133.2	0.648373	1.27698	2.24369	2.94423	3.03699	1.34002	1.80632	0.597929		133.2	1.53819	1.84919	1.8871	1.67543	1.39062	1.32727	1.14233	0.687885		133.2	1.85798	2.23399	2.05979	2.31481	1.70986	1.14703	0.453011	-0.0471855
133.4	0.644905	1.14908	1.78025	2.35768	2.39185	0.856162	1.56929	0.344997			133.4	0.662386	1.05839	1.9575	2.64819	2.93107	1.40384	2.86399	0.879034		133.4	0.651186	1.27789	2.2517	2.95412	3.04551	1.34519	1.81086	0.598956		133.4	1.53313	1.84534	1.89068	1.67684	1.38747	1.33001	1.14483	0.688377		133.4	1.85838	2.23328	2.06229	2.31413	1.70997	1.14692	0.454839	-0.047557
133.6	0.642406	1.15484	1.77875	2.36437	2.40141	0.858521	1.57293	0.346309			133.6	0.664241	1.0591	1.96321	2.65991	2.94005	1.40927	2.87894	0.899889		133.6	0.671136	1.27791	2.25924	2.96123	3.05395	1.3538	1.81634	0.598198		133.6	1.53385	1.84835	1.89332	1.67494	1.39165	1.32203	1.14133	0.686509		133.6	1.85967	2.23445	2.06023	2.31499	1.70917	1.147	0.454602	-0.0477457
133.8	0.642513	1.16041	1.77757	2.37042	2.40759	0.863108	1.57933	0.347			133.8	0.665509	1.06148	1.96726	2.67048	2.94798	1.41633	2.8791	0.886326		133.8	0.660849	1.27998	2.26492	2.96761	3.06133	1.36178	1.82185	0.598165		133.8	1.53708	1.84673	1.89164	1.67154	1.38503	1.31984	1.14219	0.690376		133.8	1.85849	2.23667	2.06267	2.31655	1.71042	1.14643	0.454986	-0.046791
134	0.63961	1.1652	1.79353	2.37691	2.41775	0.865101	1.58383	0.347733			134	0.666939	1.06414	1.97584	2.67756	2.95399	1.42139	2.89322	0.88171		134	0.660004	1.2811	2.27409	2.98125	3.06979	1.36428	1.83011	0.599236		134	1.53811	1.85082	1.891	1.67037	1.38907	1.3273	1.14339	0.686015		134	1.8597	2.23622	2.06189	2.31819	1.70629	1.14615	0.454541	-0.0497176
134.2	0.642132	1.16783	1.80615	2.38552	2.42434	0.871486	1.58757	0.348638			134.2	0.667463	1.06922	1.9812	2.68606	2.95981	1.42734	2.89901	0.903423		134.2	0.679267	1.28171	2.28473	2.99392	3.07918	1.36711	1.8353	0.601219		134.2	1.54122	1.85043	1.88812	1.67148	1.39013	1.31915	1.14273	0.69426		134.2	1.86078	2.23639	2.0633	2.31837	1.70701	1.14623	0.455789	-0.0489952
134.4	0.643627	1.17186	1.80148	2.39345	2.43278	0.873483	1.59013	0.351256			134.4	0.669442	1.07339	1.98591	2.69345	2.96548	1.43489	2.91132	0.891614		134.4	0.669161	1.28525	2.29051	3.00076	3.09113	1.37295	1.83928	0.601813		134.4	1.53798	1.84675	1.88999	1.67272	1.38828	1.32397	1.14328	0.68938		134.4	1.86101	2.23579	2.06054	2.31887	1.70619	1.14632	0.455359	-0.051551
134.6	0.64842	1.17575	1.80628	2.40442	2.44014	0.879264	1.59512	0.354716			134.6	0.673178	1.07872	1.99281	2.70447	2.97144	1.4392	2.91791	0.884447		134.6	0.667008	1.28342	2.29501	3.00782	3.09881	1.37395	1.84067	0.601729		134.6	1.53342	1.85217	1.88758	1.67495	1.39277	1.32514	1.14598	0.69006		134.6	1.86034	2.2364	2.06502	2.31877	1.70754	1.14651	0.454252	-0.0497542
134.8	0.651605	1.17885	1.82454	2.41331	2.44801	0.880716	1.60104	0.357467			134.8	0.673069	1.08239	2.0007	2.7167	2.98015	1.44517	2.92797	0.904958		134.8	0.684229	1.28337	2.30098	3.02462	3.1071	1.38066	1.8462	0.602674		134.8	1.53679	1.85023	1.89237	1.66961	1.39063	1.32211	1.14322	0.685502		134.8	1.86076	2.23654	2.06321	2.31816	1.70527	1.14841	0.454735	-0.0506244
135	0.657146	1.1822	1.82892	2.42003	2.45467	0.886871	1.60278	0.360078			135	0.676424	1.08686	2.00427	2.7259	2.98992	1.45106	2.93709	0.897748		135	0.674281	1.28264	2.3081	3.03617	3.11522	1.3905	1.85059	0.603687		135	1.54027	1.84576	1.89276	1.67187	1.38925	1.32393	1.14127	0.691934		135	1.86107	2.23678	2.06403	2.31754	1.70879	1.14885	0.454141	-0.0485603
135.2	0.65564	1.18635	1.82545	2.42629	2.46188	0.887779	1.6136	0.362545			135.2	0.678098	1.09073	2.01196	2.732	3.00074	1.45484	2.9413	0.891615		135.2	0.672398	1.28523	2.31618	3.04156	3.12589	1.3976	1.85628	0.60364		135.2	1.5381	1.85309	1.88571	1.66838	1.38599	1.32256	1.14169	0.689691		135.2	1.8615	2.23757	2.06456	2.31782	1.70618	1.14942	0.454025	-0.049898
135.4	0.657649	1.1916	1.83768	2.43103	2.47157	0.892267	1.61789	0.362993			135.4	0.681095	1.09577	2.01969	2.74138	3.01107	1.45883	2.95069	0.911017		135.4	0.690341	1.28807	2.32315	3.04811	3.13345	1.40149	1.86031	0.604598		135.4	1.54012	1.84971	1.89317	1.6702	1.38649	1.32308	1.14462	0.689173		135.4	1.86158	2.24041	2.06502	2.31616	1.70681	1.15069	0.453903	-0.0475361
135.6	0.65848	1.19732	1.85321	2.43573	2.47938	0.894346	1.61772	0.362863			135.6	0.68272	1.09862	2.02532	2.75235	3.02153	1.46114	2.95451	0.904481		135.6	0.681128	1.29565	2.33388	3.06169	3.143	1.40756	1.86526	0.606468		135.6	1.53172	1.85147	1.89322	1.67314	1.39304	1.32554	1.14253	0.692116		135.6	1.86256	2.24005	2.06268	2.31525	1.70684	1.15149	0.456515	-0.049453
135.8	0.658332	1.20296	1.84839	2.44342	2.48917	0.899248	1.61554	0.363842			135.8	0.684779	1.10372	2.02971	2.76076	3.02876	1.46722	2.96858	0.899355		135.8	0.678817	1.29954	2.3438	3.07118	3.15125	1.40925	1.86676	0.607457		135.8	1.53936	1.85207	1.89019	1.67051	1.39398	1.32363	1.1456	0.691216		135.8	1.86313	2.23917	2.06491	2.31653	1.70888	1.15063	0.454801	-0.0480573
136	0.658995	1.206	1.85027	2.45132	2.49681	0.901209	1.62584	0.365603			136	0.68724	1.10681	2.03624	2.77352	3.03652	1.4691	2.97182	0.920574		136	0.698896	1.3048	2.35283	3.07725	3.15865	1.41218	1.87054	0.607827		136	1.53554	1.85465	1.88925	1.66947	1.39195	1.32271	1.14064	0.68905		136	1.86341	2.24033	2.06563	2.3173	1.70777	1.14965	0.458866	-0.0501153
136.2	0.661187	1.21041	1.8673	2.46088	2.50331	0.903283	1.62464	0.366029			136.2	0.687625	1.11173	2.04324	2.78259	3.04218	1.47428	2.98603	0.910252		136.2	0.689203	1.3093	2.3567	3.08396	3.16796	1.41689	1.87651	0.607826		136.2	1.53946	1.8527	1.8925	1.67691	1.39099	1.32629	1.14492	0.69104		136.2	1.8631	2.24113	2.06463	2.31663	1.71099	1.14921	0.459855	-0.0464291
136.4	0.665727	1.2135	1.87153	2.46928	2.51161	0.908689	1.63103	0.368173			136.4	0.68952	1.11364	2.04873	2.78807	3.05018	1.47877	2.98897	0.907965		136.4	0.688199	1.31364	2.3646	3.09329	3.17651	1.42352	1.88639	0.609781		136.4	1.54022	1.84892	1.89275	1.67052	1.38282	1.324	1.1403	0.686884		136.4	1.86375	2.24101	2.06908	2.31737	1.71232	1.14845	0.459784	-0.0477891
136.6	0.664947	1.21821	1.86699	2.47192	2.51873	0.911895	1.63983	0.370962			136.6	0.689279	1.11819	2.05668	2.79597	3.05792	1.48435	3.0021	0.928086		136.6	0.708288	1.3271	2.37261	3.10817	3.18451	1.42788	1.89223	0.610412		136.6	1.5428	1.85039	1.8895	1.6738	1.38999	1.32317	1.14079	0.687197		136.6	1.8631	2.23909	2.06949	2.31869	1.70966	1.14804	0.4583	-0.0462537
136.8	0.667784	1.21999	1.88032	2.47352	2.52748	0.916937	1.64651	0.373134			136.8	0.691569	1.12116	2.06388	2.80541	3.06757	1.48757	3.00739	0.917403		136.8	0.700257	1.33751	2.38195	3.1188	3.19367	1.43548	1.89911	0.612308		136.8	1.53964	1.84949	1.89263	1.67652	1.38684	1.31963	1.14158	0.687674		136.8	1.8632	2.24045	2.0694	2.31755	1.71232	1.14778	0.459098	-0.0475036
137	0.666963	1.22639	1.89327	2.47723	2.53447	0.919898	1.64632	0.374126			137	0.694082	1.12661	2.07252	2.81358	3.0754	1.49474	3.01548	0.914356		137	0.696276	1.34972	2.38955	3.12587	3.20209	1.44049	1.90215	0.615088		137	1.53644	1.85408	1.88988	1.66928	1.39182	1.32332	1.14323	0.690007		137	1.86451	2.23982	2.06989	2.31817	1.71274	1.14876	0.454633	-0.0455404
137.2	0.67072	1.23063	1.88868	2.48354	2.54558	0.92704	1.65201	0.376243			137.2	0.695421	1.12799	2.07742	2.82626	3.08537	1.50031	3.02294	0.93383		137.2	0.714064	1.35687	2.39591	3.13417	3.21148	1.4434	1.90666	0.617135		137.2	1.53658	1.84954	1.88805	1.67103	1.39407	1.32372	1.1447	0.685452		137.2	1.8656	2.23787	2.07039	2.31887	1.70878	1.14868	0.453538	-0.0494647
137.4	0.670328	1.23524	1.89881	2.48878	2.5517	0.927897	1.65453	0.378511			137.4	0.698857	1.13357	2.08344	2.83876	3.09171	1.50683	3.03101	0.920474		137.4	0.704237	1.36966	2.40424	3.14601	3.21999	1.44836	1.91331	0.618644		137.4	1.54229	1.84847	1.89085	1.67205	1.39112	1.32101	1.14398	0.686004		137.4	1.87034	2.23749	2.06679	2.31951	1.70888	1.14782	0.453829	-0.0477901
137.6	0.675467	1.23608	1.91639	2.49752	2.55982	0.933754	1.65785	0.378941			137.6	0.700109	1.13778	2.08744	2.84597	3.09977	1.51324	3.04263	0.919482		137.6	0.699639	1.36918	2.41403	3.15579	3.22689	1.45526	1.92236	0.620942		137.6	1.53886	1.8514	1.89313	1.67283	1.38363	1.32224	1.14494	0.685237		137.6	1.87131	2.24008	2.06632	2.3197	1.71203	1.14827	0.453815	-0.0491187
137.8	0.677937	1.23852	1.91727	2.50577	2.56901	0.934174	1.66137	0.380277			137.8	0.704622	1.14246	2.09395	2.8531	3.10833	1.51929	3.04686	0.93904		137.8	0.717028	1.37273	2.41976	3.16114	3.23521	1.45937	1.92796	0.623277		137.8	1.54027	1.85117	1.89037	1.67076	1.38686	1.32257	1.13987	0.690733		137.8	1.87296	2.23973	2.0657	2.31947	1.7094	1.14834	0.453548	-0.047748
138	0.683261	1.2419	1.91692	2.51525	2.57462	0.938242	1.66626	0.382003			138	0.704282	1.14615	2.09974	2.86359	3.1153	1.52233	3.05976	0.92708		138	0.708095	1.37607	2.42573	3.16957	3.24354	1.46552	1.9356	0.624809		138	1.53997	1.85388	1.89064	1.67128	1.38836	1.32313	1.14384	0.692133		138	1.87124	2.24119	2.06351	2.31873	1.70996	1.14923	0.45415	-0.0496437
138.2	0.683349	1.24884	1.93488	2.521	2.58203	0.940592	1.66943	0.381794			138.2	0.70697	1.14853	2.10593	2.87169	3.12134	1.52834	3.063	0.929714		138.2	0.708707	1.38303	2.43514	3.18128	3.25023	1.47048	1.94162	0.627064		138.2	1.54235	1.85563	1.89374	1.67593	1.38797	1.32472	1.13993	0.686963		138.2	1.87067	2.24345	2.06449	2.31943	1.7132	1.15025	0.452863	-0.0480039
138.4	0.683548	1.25349	1.94243	2.52942	2.59166	0.944093	1.67402	0.383024			138.4	0.708278	1.15228	2.1128	2.88232	3.1319	1.53492	3.07719	0.946585		138.4	0.721639	1.38772	2.44323	3.19423	3.25851	1.4773	1.94203	0.627785		138.4	1.54408	1.8545	1.89168	1.67226	1.38624	1.32642	1.14288	0.690022		138.4	1.86821	2.24291	2.06503	2.31945	1.71308	1.15139	0.453404	-0.048672
138.6	0.685194	1.25852	1.93839	2.53913	2.59843	0.948263	1.6779	0.384674			138.6	0.710468	1.15706	2.11966	2.89518	3.14017	1.5389	3.08051	0.933433		138.6	0.714349	1.39813	2.44612	3.20243	3.26924	1.4826	1.94861	0.62922		138.6	1.54183	1.85294	1.89402	1.67137	1.38928	1.32702	1.14217	0.691478		138.6	1.86626	2.24325	2.0653	2.31916	1.71272	1.15067	0.454451	-0.0474795
138.8	0.687332	1.26244	1.95066	2.55021	2.60484	0.952175	1.68431	0.386609			138.8	0.71154	1.15936	2.12393	2.90429	3.14597	1.53917	3.09364	0.937632		138.8	0.715635	1.4102	2.45566	3.20881	3.27436	1.48808	1.95819	0.630917		138.8	1.54672	1.85296	1.89464	1.67036	1.39241	1.32268	1.14265	0.692467		138.8	1.86637	2.24395	2.06332	2.32005	1.7124	1.15048	0.456663	-0.0479716
139	0.687972	1.26556	1.96264	2.55607	2.61383	0.957142	1.68851	0.388181			139	0.712617	1.16294	2.12886	2.91034	3.15473	1.54276	3.09908	0.95374		139	0.727259	1.42126	2.46358	3.21839	3.28292	1.49225	1.96705	0.63253		139	1.54048	1.85567	1.88906	1.6714	1.38925	1.32242	1.14083	0.686472		139	1.8672	2.24275	2.06554	2.31958	1.70998	1.14916	0.459014	-0.0469927
139.2	0.690115	1.2692	1.95954	2.56505	2.62024	0.959716	1.69309	0.390789			139.2	0.717143	1.16826	2.13438	2.92019	3.16362	1.54806	3.10858	0.93766		139.2	0.717381	1.43481	2.47187	3.23045	3.29007	1.49996	1.97175	0.635364		139.2	1.54974	1.84842	1.89201	1.67274	1.38937	1.32762	1.13968	0.688645		139.2	1.86815	2.244	2.06509	2.31878	1.70969	1.149	0.460228	-0.0484177
139.4	0.694693	1.27448	1.96453	2.57436	2.62783	0.96519	1.69767	0.390852			139.4	0.717395	1.17145	2.14002	2.92863	3.1716	1.5495	3.11413	0.946624		139.4	0.726761	1.4425	2.47951	3.24048	3.29739	1.50292	1.97628	0.638459		139.4	1.5416	1.84979	1.8902	1.67075	1.39066	1.3219	1.14113	0.690328		139.4	1.8696	2.24528	2.06495	2.31844	1.71027	1.14952	0.459336	-0.0465064
139.6	0.693843	1.28008	1.98333	2.58174	2.63719	0.968216	1.70216	0.393061			139.6	0.721848	1.17563	2.14771	2.93946	3.17958	1.55647	3.12167	0.95948		139.6	0.736241	1.45285	2.48975	3.2488	3.30333	1.50712	1.9782	0.640202		139.6	1.5454	1.85449	1.89469	1.67405	1.38629	1.32443	1.14337	0.693506		139.6	1.87108	2.2455	2.06547	2.31763	1.70949	1.15001	0.460428	-0.0474646
139.8	0.692948	1.28041	1.98255	2.58814	2.6464	0.97292	1.70537	0.392527			139.8	0.721631	1.17987	2.15548	2.95112	3.18746	1.56374	3.12992	0.944979		139.8	0.727524	1.46213	2.49628	3.25928	3.31277	1.51321	1.97997	0.640653		139.8	1.5443	1.85478	1.8955	1.67329	1.38868	1.32201	1.13906	0.68975		139.8	1.87198	2.24499	2.06728	2.31733	1.71063	1.15015	0.458779	-0.0468926
140	0.694163	1.28254	1.98251	2.59626	2.65152	0.975231	1.70884	0.394354			140	0.724843	1.18385	2.16262	2.96045	3.19609	1.56949	3.13508	0.955325		140	0.74058	1.46854	2.50144	3.27074	3.3212	1.51956	1.98458	0.641472		140	1.54496	1.85378	1.89089	1.6702	1.38829	1.32122	1.14019	0.691321		140	1.87287	2.24622	2.06561	2.31806	1.712	1.1502	0.458988	-0.0465035
140.2	0.694315	1.28766	1.99855	2.60177	2.66005	0.978813	1.71381	0.398022			140.2	0.724659	1.18797	2.17256	2.96675	3.20355	1.57041	3.14929	0.965213		140.2	0.745833	1.47158	2.5082	3.28138	3.32846	1.52504	1.99379	0.641116		140.2	1.54815	1.85308	1.89374	1.67419	1.38287	1.32236	1.14068	0.687198		140.2	1.87181	2.24478	2.06455	2.31936	1.71306	1.15032	0.459243	-0.0441386
140.4	0.694523	1.29533	2.00676	2.60764	2.66601	0.981429	1.71778	0.401244			140.4	0.728112	1.19089	2.17663	2.97686	3.21128	1.57416	3.1529	0.951839		140.4	0.733769	1.47644	2.51683	3.28854	3.3375	1.52942	2.00254	0.641862		140.4	1.548	1.85635	1.89507	1.67274	1.38753	1.31814	1.14338	0.691254		140.4	1.87157	2.24496	2.06666	2.31856	1.71176	1.1498	0.460434	-0.0463957
140.6	0.69652	1.30128	2.00117	2.61517	2.6752	0.982406	1.72185	0.402611			140.6	0.728491	1.19401	2.18077	2.98661	3.21793	1.57538	3.16733	0.967368		140.6	0.748589	1.48096	2.52335	3.29611	3.34821	1.53688	2.00598	0.64339		140.6	1.54774	1.85572	1.89252	1.67376	1.3925	1.31945	1.14316	0.688591		140.6	1.87207	2.24453	2.0676	2.31937	1.71166	1.14918	0.456676	-0.0467024
140.8	0.700889	1.30532	2.01306	2.62455	2.68169	0.987603	1.7253	0.405188			140.8	0.731367	1.19707	2.18721	2.99679	3.22869	1.58033	3.17087	0.971599		140.8	0.75111	1.48452	2.53344	3.30571	3.35801	1.54372	2.01066	0.646507		140.8	1.54489	1.85465	1.89228	1.67406	1.38797	1.32307	1.13949	0.691305		140.8	1.87239	2.24394	2.06862	2.31905	1.70987	1.14912	0.456024	-0.0483807
141	0.702085	1.3047	2.02867	2.63155	2.69183	0.990996	1.73119	0.408722			141	0.73357	1.20078	2.19144	3.00892	3.23669	1.585	3.18403	0.958128		141	0.74115	1.49164	2.54334	3.31758	3.36869	1.54776	2.01581	0.648359		141	1.54545	1.85493	1.89128	1.66962	1.38471	1.32103	1.14044	0.692658		141	1.87233	2.24374	2.06866	2.31997	1.71084	1.14967	0.455897	-0.0483097
141.2	0.705056	1.3071	2.02334	2.64043	2.69966	0.995944	1.73515	0.410119			141.2	0.733499	1.20561	2.19173	3.01897	3.24614	1.59249	3.1853	0.979873		141.2	0.758681	1.49914	2.54881	3.32757	3.37883	1.55396	2.02117	0.650325		141.2	1.53988	1.85275	1.8916	1.67021	1.38734	1.3211	1.14216	0.690992		141.2	1.87278	2.24118	2.07047	2.31991	1.71047	1.14986	0.455541	-0.0492665
141.4	0.706826	1.31323	2.02825	2.64751	2.70893	0.999732	1.73867	0.411413			141.4	0.735694	1.21146	2.19902	3.02362	3.25313	1.59961	3.19965	0.978093		141.4	0.760053	1.5048	2.55348	3.33588	3.38753	1.56003	2.0295	0.650464		141.4	1.54395	1.85557	1.89136	1.67135	1.38424	1.31974	1.13939	0.685129		141.4	1.87397	2.2421	2.06807	2.32052	1.71125	1.14951	0.454274	-0.0485378
141.6	0.710279	1.3221	2.04582	2.65518	2.71568	1.005	1.74624	0.411648			141.6	0.737494	1.21653	2.2047	3.03178	3.26218	1.6018	3.20453	0.963558		141.6	0.750862	1.51162	2.56177	3.34324	3.39367	1.5644	2.03977	0.652099		141.6	1.54672	1.85243	1.8904	1.674	1.38697	1.32654	1.14743	0.690967		141.6	1.87426	2.24337	2.07011	2.32116	1.71207	1.14994	0.457207	-0.0490532
141.8	0.71022	1.32766	2.04816	2.66167	2.72361	1.00553	1.75131	0.415176			141.8	0.742597	1.22072	2.2098	3.04088	3.26847	1.60396	3.21288	0.983149		141.8	0.767745	1.51819	2.56635	3.35349	3.40052	1.56799	2.04616	0.651219		141.8	1.54592	1.85683	1.89348	1.67041	1.39102	1.32217	1.1391	0.687813		141.8	1.87514	2.24546	2.06815	2.32048	1.7128	1.15	0.458848	-0.0464403
142	0.713427	1.33073	2.04626	2.66978	2.73131	1.00945	1.75394	0.416155			142	0.742403	1.22532	2.21468	3.048	3.27577	1.61178	3.22101	0.978419		142	0.763459	1.52674	2.57279	3.3643	3.409	1.57344	2.05094	0.651132		142	1.54303	1.8556	1.89367	1.67042	1.38743	1.32221	1.14428	0.687812		142	1.87522	2.24615	2.06846	2.31896	1.7138	1.15125	0.456119	-0.0465092
142.2	0.71308	1.33024	2.06484	2.67826	2.73919	1.01267	1.7593	0.418934			142.2	0.748015	1.22655	2.22316	3.05942	3.28181	1.61605	3.22737	0.968905		142.2	0.758264	1.53414	2.5813	3.37251	3.41568	1.57762	2.05403	0.651285		142.2	1.5451	1.85308	1.89497	1.66953	1.38637	1.32223	1.13743	0.687639		142.2	1.87698	2.24878	2.06853	2.32009	1.71197	1.15006	0.457125	-0.0467691
142.4	0.7141	1.33231	2.07235	2.68523	2.74659	1.01424	1.76162	0.420638			142.4	0.748086	1.2283	2.23207	3.07023	3.28992	1.61777	3.2349	0.985955		142.4	0.771975	1.54503	2.58833	3.37822	3.42512	1.58325	2.05743	0.653579		142.4	1.54545	1.85378	1.89229	1.67166	1.39026	1.31925	1.14475	0.689711		142.4	1.87566	2.24675	2.06965	2.31983	1.71305	1.1508	0.45679	-0.0467785
142.6	0.714571	1.33943	2.06815	2.69032	2.75449	1.0191	1.76337	0.423631			142.6	0.751171	1.23306	2.23926	3.0791	3.29857	1.6245	3.23998	0.981223		142.6	0.765511	1.55279	2.59559	3.38988	3.43246	1.58789	2.06488	0.653774		142.6	1.55042	1.85473	1.88964	1.67408	1.38479	1.31739	1.14041	0.68904		142.6	1.87647	2.24625	2.06777	2.3198	1.71493	1.15216	0.456288	-0.0435397
142.8	0.717167	1.34798	2.08348	2.69724	2.76307	1.02326	1.76584	0.424273			142.8	0.750124	1.23675	2.24458	3.08535	3.30686	1.62942	3.25315	0.981561		142.8	0.765474	1.55972	2.60496	3.40008	3.4411	1.59414	2.07422	0.656661		142.8	1.54573	1.85849	1.89364	1.67548	1.38498	1.3249	1.14204	0.68775		142.8	1.87623	2.24433	2.06886	2.32061	1.7148	1.15215	0.458092	-0.0472417
143	0.718539	1.35569	2.0943	2.70714	2.77148	1.02692	1.77429	0.424622			143	0.754993	1.24115	2.25349	3.09528	3.31601	1.63202	3.2556	0.993117		143	0.778787	1.56121	2.61389	3.40831	3.4481	1.60236	2.07936	0.657837		143	1.54711	1.85629	1.89612	1.67063	1.38791	1.32381	1.13788	0.690234		143	1.87603	2.24391	2.06861	2.3206	1.71183	1.15182	0.460568	-0.0438154
143.2	0.724898	1.35645	2.0894	2.71168	2.77801	1.03163	1.78232	0.42301			143.2	0.754999	1.2477	2.25871	3.10462	3.32434	1.63454	3.26886	0.982602		143.2	0.770156	1.56543	2.62396	3.41594	3.45665	1.60561	2.08422	0.660443		143.2	1.54998	1.85227	1.88565	1.67074	1.38911	1.31964	1.14317	0.693767		143.2	1.87533	2.24542	2.06893	2.31901	1.71474	1.15257	0.459761	-0.0454153
143.4	0.728876	1.3545	2.10089	2.72208	2.78483	1.0361	1.79179	0.424258			143.4	0.758518	1.25348	2.26205	3.11586	3.3325	1.6413	3.27095	0.99195		143.4	0.776198	1.56499	2.63369	3.42491	3.46469	1.61223	2.08982	0.661518		143.4	1.54621	1.85704	1.88937	1.67002	1.38389	1.32201	1.14116	0.691461		143.4	1.87636	2.24689	2.07034	2.32155	1.71494	1.15277	0.461286	-0.0451133
143.6	0.731855	1.35277	2.11258	2.73202	2.79431	1.03946	1.79842	0.426347			143.6	0.759717	1.25492	2.26946	3.12809	3.33946	1.64928	3.28456	0.999938		143.6	0.787588	1.56246	2.64143	3.43502	3.47535	1.61632	2.09291	0.663751		143.6	1.54995	1.8566	1.89269	1.67474	1.39487	1.32454	1.14283	0.690286		143.6	1.87594	2.24709	2.07013	2.31966	1.71403	1.1515	0.462448	-0.0468872
143.8	0.735033	1.35754	2.10888	2.7417	2.80065	1.04208	1.80645	0.428625			143.8	0.762353	1.26075	2.27689	3.13545	3.34612	1.65597	3.28715	0.987362		143.8	0.777304	1.56071	2.64877	3.44367	3.48636	1.6218	2.0968	0.662934		143.8	1.55022	1.85932	1.89524	1.67136	1.38934	1.32597	1.14263	0.689843		143.8	1.87552	2.24773	2.07026	2.32148	1.71496	1.15181	0.458733	-0.0459201
144	0.737338	1.36427	2.11627	2.74583	2.80805	1.04675	1.80648	0.43087			144	0.762486	1.26472	2.28219	3.14016	3.35292	1.66014	3.29762	1.00186		144	0.787962	1.56454	2.65455	3.45404	3.49158	1.62592	2.10628	0.665281		144	1.54675	1.85262	1.89127	1.67314	1.38204	1.31927	1.1439	0.689493		144	1.87676	2.24825	2.07148	2.32253	1.71788	1.15253	0.457885	-0.0499427
144.2	0.736386	1.37283	2.13094	2.75698	2.81551	1.04645	1.80996	0.432753			144.2	0.763379	1.26815	2.29097	3.14757	3.35975	1.66415	3.30259	1.00221		144.2	0.793408	1.56475	2.6608	3.46204	3.50074	1.63423	2.11319	0.665684		144.2	1.5462	1.85587	1.89377	1.66691	1.38344	1.31992	1.1452	0.687775		144.2	1.8778	2.2461	2.07296	2.32402	1.71639	1.15326	0.459623	-0.0491689
144.4	0.738016	1.37653	2.1286	2.76225	2.82473	1.0511	1.81178	0.433612			144.4	0.765134	1.27126	2.29907	3.15736	3.36636	1.66701	3.31386	0.994248		144.4	0.784438	1.57002	2.66667	3.46977	3.50775	1.63594	2.11852	0.666935		144.4	1.54496	1.85655	1.89424	1.67646	1.38784	1.31652	1.1421	0.689488		144.4	1.87581	2.24618	2.07262	2.32328	1.71625	1.15295	0.457589	-0.0488998
144.6	0.737835	1.37829	2.13514	2.77088	2.83115	1.05823	1.81358	0.434612			144.6	0.766975	1.27434	2.30558	3.16702	3.37502	1.66576	3.32045	1.00626		144.6	0.79816	1.57995	2.67305	3.48219	3.51311	1.64114	2.12518	0.666495		144.6	1.54944	1.85389	1.89228	1.66746	1.38875	1.32613	1.14361	0.685956		144.6	1.87798	2.24719	2.07433	2.32444	1.71414	1.15298	0.455362	-0.0489549
144.8	0.73996	1.38011	2.15189	2.77738	2.83922	1.06166	1.81793	0.435621			144.8	0.770036	1.27755	2.31278	3.18018	3.38379	1.67002	3.32982	1.00343		144.8	0.798095	1.59459	2.67977	3.49272	3.51909	1.64701	2.1289	0.668006		144.8	1.54544	1.85505	1.8926	1.66852	1.38888	1.31984	1.1387	0.687062		144.8	1.87767	2.24959	2.07402	2.32233	1.71442	1.15406	0.455927	-0.0461776
145	0.739799	1.38747	2.15052	2.78403	2.84708	1.06604	1.8257	0.436911			145	0.772604	1.27973	2.32103	3.19197	3.39109	1.67424	3.33996	1.00087		145	0.789832	1.60376	2.69024	3.50109	3.5312	1.65343	2.13121	0.668099		145	1.5457	1.85636	1.89351	1.67209	1.3878	1.32339	1.14248	0.691104		145	1.87728	2.2501	2.07549	2.32246	1.71288	1.15337	0.45577	-0.0470987
145.2	0.741311	1.39532	2.1517	2.79288	2.85385	1.07129	1.82921	0.439205			145.2	0.775712	1.28608	2.32612	3.1985	3.40147	1.68011	3.3455	1.01591		145.2	0.805144	1.61357	2.69999	3.50883	3.53936	1.65895	2.13652	0.668955		145.2	1.54866	1.85554	1.89509	1.67067	1.38678	1.32291	1.14187	0.690012		145.2	1.87644	2.25076	2.07485	2.32201	1.71268	1.15182	0.453628	-0.0463204
145.4	0.741214	1.40277	2.17144	2.79969	2.86011	1.07553	1.83732	0.439783			145.4	0.776998	1.29107	2.33194	3.20345	3.40924	1.69001	3.35673	1.0084		145.4	0.800912	1.62019	2.7089	3.51842	3.54993	1.668	2.14508	0.669965		145.4	1.54938	1.85552	1.89439	1.67007	1.38939	1.32172	1.14636	0.69262		145.4	1.8785	2.25118	2.07568	2.32262	1.71348	1.1522	0.455397	-0.0471924
145.6	0.744518	1.40581	2.17195	2.80688	2.87052	1.07527	1.84427	0.440638			145.6	0.780127	1.29722	2.3369	3.21315	3.41542	1.70028	3.36251	1.01624		145.6	0.794797	1.62622	2.71836	3.52948	3.55915	1.67427	2.15161	0.671169		145.6	1.54791	1.85792	1.89363	1.67008	1.38638	1.32001	1.13695	0.685454		145.6	1.87809	2.25324	2.07398	2.32407	1.71443	1.15247	0.457763	-0.0466468
145.8	0.745514	1.40488	2.1698	2.81185	2.87851	1.07853	1.84321	0.441582			145.8	0.778695	1.30091	2.34247	3.22149	3.42428	1.70426	3.37562	1.02712		145.8	0.811965	1.62573	2.72368	3.53797	3.56664	1.67709	2.15794	0.672735		145.8	1.5519	1.85406	1.89816	1.67326	1.38498	1.32197	1.13903	0.686048		145.8	1.87918	2.2529	2.07459	2.32496	1.7145	1.15128	0.458606	-0.0473113
146	0.751713	1.40473	2.1891	2.82337	2.8863	1.08073	1.84732	0.442265			146	0.781946	1.30575	2.34513	3.23323	3.43301	1.70834	3.37709	1.01557		146	0.806557	1.63014	2.7303	3.547	3.57618	1.68259	2.16212	0.673847		146	1.54813	1.85839	1.89339	1.67271	1.38897	1.319	1.14209	0.691523		146	1.88019	2.25364	2.07425	2.32476	1.71512	1.15096	0.458908	-0.0456632
146.2	0.756002	1.41045	2.19376	2.82486	2.89429	1.08318	1.84965	0.442857			146.2	0.78286	1.30807	2.35366	3.24574	3.43996	1.71326	3.3923	1.02936		146.2	0.805386	1.6289	2.73737	3.55478	3.58292	1.68642	2.16649	0.674731		146.2	1.5474	1.85569	1.89817	1.67246	1.38901	1.32114	1.14002	0.694026		146.2	1.88138	2.25391	2.07481	2.32454	1.71699	1.15294	0.458434	-0.0465472
146.4	0.756785	1.41907	2.19261	2.83329	2.90319	1.08574	1.85167	0.445211			146.4	0.786803	1.31067	2.36247	3.25508	3.44799	1.71374	3.3925	1.03375		146.4	0.8176	1.63217	2.74323	3.5641	3.58917	1.68997	2.16944	0.676372		146.4	1.54818	1.85452	1.89237	1.67327	1.38927	1.31853	1.14049	0.688989		146.4	1.88254	2.25365	2.07386	2.32511	1.71465	1.15323	0.459729	-0.0456983
146.6	0.756769	1.42774	2.21056	2.83977	2.91191	1.0912	1.85417	0.445801			146.6	0.785982	1.31451	2.36756	3.26248	3.45918	1.71957	3.40608	1.02383		146.6	0.810693	1.63192	2.74974	3.5748	3.59707	1.69741	2.178	0.678487		146.6	1.5508	1.85542	1.8907	1.67373	1.38827	1.32242	1.14069	0.692634		146.6	1.88406	2.24908	2.07605	2.32466	1.71546	1.15297	0.458333	-0.0478238
146.8	0.756569	1.43409	2.2162	2.84772	2.91873	1.09764	1.86276	0.445078			146.8	0.79012	1.31955	2.37266	3.27096	3.46667	1.72573	3.40741	1.03889		146.8	0.814997	1.63499	2.75783	3.58607	3.60536	1.70243	2.18629	0.678583		146.8	1.55466	1.85917	1.89344	1.67494	1.3899	1.32591	1.14236	0.689439		146.8	1.88393	2.24887	2.07554	2.32406	1.71406	1.15249	0.45881	-0.0492383
147	0.756736	1.43301	2.21366	2.85461	2.92556	1.10224	1.86485	0.446241			147	0.78939	1.32353	2.37886	3.28003	3.47631	1.73368	3.42118	1.03922		147	0.822459	1.63765	2.76576	3.59274	3.61041	1.7077	2.19343	0.679529		147	1.54758	1.85805	1.88912	1.67344	1.38801	1.32359	1.14111	0.689281		147	1.88454	2.24885	2.07524	2.32483	1.71618	1.15191	0.45841	-0.0485006
147.2	0.754931	1.43309	2.2311	2.86837	2.93503	1.1069	1.87153	0.446844			147.2	0.79353	1.32798	2.38366	3.28932	3.48516	1.73971	3.42287	1.02888		147.2	0.816818	1.64518	2.77403	3.60388	3.6188	1.71425	2.19833	0.681035		147.2	1.55098	1.85734	1.89334	1.67291	1.38302	1.32075	1.14002	0.685111		147.2	1.88497	2.25053	2.07571	2.32391	1.71527	1.15096	0.459089	-0.0456598
147.4	0.759543	1.4365	2.23591	2.87631	2.94318	1.11151	1.87695	0.445663			147.4	0.794814	1.33134	2.38778	3.30127	3.49376	1.74602	3.43467	1.04192		147.4	0.828064	1.65299	2.78487	3.61256	3.62775	1.72164	2.20217	0.680691		147.4	1.54887	1.85821	1.89502	1.67036	1.38467	1.31925	1.1425	0.691014		147.4	1.8841	2.252	2.0763	2.32192	1.71659	1.15121	0.457966	-0.0474224
147.6	0.763793	1.44579	2.23272	2.88503	2.94957	1.11346	1.88849	0.446356			147.6	0.798139	1.33545	2.395	3.31218	3.50058	1.75043	3.4391	1.03632		147.6	0.834721	1.66254	2.79204	3.62206	3.63774	1.72719	2.20548	0.682291		147.6	1.54613	1.85728	1.89584	1.67114	1.38714	1.31926	1.13991	0.692688		147.6	1.88329	2.25461	2.07505	2.3224	1.71629	1.15053	0.459094	-0.0452997
147.8	0.767478	1.45367	2.25057	2.89464	2.95813	1.11713	1.89792	0.447159			147.8	0.800459	1.3392	2.39983	3.31818	3.50992	1.75376	3.44873	1.0342		147.8	0.827499	1.66901	2.8008	3.62994	3.64524	1.7339	2.20955	0.68443		147.8	1.5485	1.85995	1.89427	1.67088	1.38462	1.31908	1.13789	0.693061		147.8	1.88397	2.25664	2.07756	2.32289	1.71716	1.15166	0.458919	-0.0440871
148	0.76782	1.46168	2.25675	2.90073	2.96757	1.1182	1.90475	0.446595			148	0.802005	1.34058	2.40703	3.32503	3.51569	1.75893	3.45478	1.04648		148	0.84303	1.6762	2.80792	3.63772	3.65396	1.73762	2.21561	0.686534		148	1.54922	1.85348	1.89068	1.6688	1.38862	1.32092	1.13597	0.687417		148	1.88098	2.25345	2.0772	2.32151	1.71478	1.15276	0.458907	-0.0460306
148.2	0.771238	1.46218	2.25449	2.90653	2.97448	1.12387	1.91021	0.447811			148.2	0.803958	1.34356	2.41213	3.33493	3.52426	1.76453	3.46282	1.03799		148.2	0.840148	1.68123	2.81467	3.64333	3.66095	1.74183	2.22435	0.687862		148.2	1.55585	1.85488	1.891	1.67586	1.38473	1.32022	1.14177	0.691593		148.2	1.8807	2.25283	2.07624	2.32249	1.71378	1.15161	0.458822	-0.0479219
148.4	0.771114	1.45916	2.27292	2.91258	2.98101	1.12718	1.91135	0.450679			148.4	0.804199	1.34915	2.41677	3.3428	3.53393	1.7671	3.47	1.04615		148.4	0.835886	1.6841	2.82047	3.65341	3.66893	1.74541	2.23323	0.689962		148.4	1.55284	1.85814	1.89621	1.66942	1.38949	1.31912	1.14338	0.69265		148.4	1.881	2.25116	2.0778	2.32411	1.71417	1.15106	0.458965	-0.0462698
148.6	0.771548	1.45743	2.27945	2.92033	2.98998	1.13275	1.91669	0.45233			148.6	0.809066	1.35276	2.4215	3.35507	3.54296	1.76959	3.47634	1.05319		148.6	0.848405	1.68529	2.83117	3.66675	3.67353	1.75153	2.2365	0.691843		148.6	1.55238	1.86051	1.8897	1.66856	1.38662	1.3182	1.13877	0.687159		148.6	1.88127	2.25165	2.07994	2.32336	1.71337	1.15287	0.460491	-0.0479962
148.8	0.772093	1.46273	2.27486	2.92643	2.99609	1.13716	1.91083	0.456415			148.8	0.808702	1.35613	2.42854	3.36389	3.54924	1.77294	3.48635	1.0457		148.8	0.845019	1.69119	2.83797	3.67708	3.68339	1.75575	2.23859	0.693082		148.8	1.55393	1.85927	1.8977	1.67358	1.38761	1.31872	1.13985	0.68861		148.8	1.88158	2.2507	2.0795	2.32434	1.71513	1.15291	0.459722	-0.0504717
149	0.774736	1.47165	2.29169	2.93313	3.00232	1.14146	1.9165	0.457915			149	0.813711	1.36246	2.43284	3.37184	3.55856	1.77638	3.49168	1.05821		149	0.842781	1.69206	2.84699	3.68422	3.69147	1.76185	2.24182	0.694319		149	1.55316	1.85612	1.8972	1.6739	1.38494	1.32317	1.14268	0.693671		149	1.88371	2.25209	2.07937	2.32499	1.71788	1.15286	0.461041	-0.0499044
149.2	0.776157	1.48048	2.29676	2.94009	3.01062	1.14498	1.9159	0.459555			149.2	0.812876	1.3668	2.43792	3.38015	3.56495	1.77718	3.50395	1.05822		149.2	0.853277	1.69507	2.8547	3.69223	3.7017	1.77005	2.24574	0.694655		149.2	1.55224	1.85873	1.89804	1.6695	1.38708	1.31898	1.14414	0.691835		149.2	1.88455	2.25189	2.07825	2.32618	1.71763	1.15386	0.461918	-0.0499349
149.4	0.77691	1.48649	2.29253	2.95118	3.01787	1.14809	1.92462	0.459672			149.4	0.819068	1.37065	2.44477	3.38967	3.57264	1.78065	3.50871	1.05707		149.4	0.846257	1.69982	2.86281	3.70305	3.70777	1.77821	2.25443	0.695906		149.4	1.5516	1.85681	1.8957	1.67174	1.38565	1.31948	1.13938	0.690538		149.4	1.88419	2.25393	2.07682	2.32475	1.71823	1.15388	0.462722	-0.0495888
149.6	0.776546	1.48754	2.31004	2.95697	3.02678	1.15297	1.92225	0.460002			149.6	0.816846	1.37455	2.45119	3.39889	3.57853	1.78318	3.52167	1.06337		149.6	0.852892	1.7071	2.86937	3.71199	3.71779	1.78361	2.26502	0.696042		149.6	1.54982	1.85732	1.89481	1.67039	1.3817	1.32228	1.14205	0.691348		149.6	1.88345	2.25241	2.07708	2.32506	1.71624	1.15327	0.460577	-0.0494917
149.8	0.779381	1.48557	2.31735	2.96617	3.03565	1.15617	1.93038	0.458537			149.8	0.822417	1.37977	2.45726	3.4116	3.5852	1.79	3.52352	1.0605		149.8	0.856447	1.71011	2.87674	3.71849	3.72456	1.79024	2.27375	0.697813		149.8	1.55293	1.86469	1.89225	1.67059	1.3868	1.31722	1.14065	0.69018		149.8	1.8823	2.25238	2.07734	2.32423	1.71505	1.15321	0.459237	-0.0471387
150	0.781995	1.48672	2.31243	2.97078	3.04438	1.15997	1.93069	0.459978			150	0.821333	1.38405	2.46437	3.41892	3.59113	1.79277	3.53781	1.06437		150	0.851069	1.71475	2.88364	3.7278	3.73312	1.79617	2.28055	0.70019		150	1.55347	1.86101	1.89653	1.67249	1.38594	1.32132	1.13904	0.691168		150	1.88292	2.25366	2.07768	2.32525	1.71276	1.15327	0.460077	-0.047644
150.2	0.784355	1.49371	2.32909	2.98119	3.05108	1.16277	1.93602	0.459624			150.2	0.824909	1.38806	2.46832	3.42423	3.59788	1.799	3.53864	1.07107		150.2	0.862359	1.72212	2.88904	3.73783	3.74126	1.80056	2.2847	0.703037		150.2	1.55562	1.86215	1.89821	1.67096	1.38445	1.32004	1.13853	0.693577		150.2	1.88354	2.25418	2.07962	2.32477	1.71517	1.15362	0.459929	-0.0466056
150.4	0.788084	1.50358	2.33591	2.98524	3.05884	1.16577	1.93813	0.459651			150.4	0.822591	1.39256	2.47252	3.43284	3.60353	1.80525	3.55204	1.06446		150.4	0.862904	1.72789	2.89847	3.74686	3.7501	1.80419	2.28623	0.705451		150.4	1.55407	1.86064	1.89407	1.66848	1.38747	1.3204	1.13915	0.690431		150.4	1.88447	2.25343	2.08151	2.3254	1.71448	1.15414	0.457416	-0.0497003
150.6	0.793626	1.51543	2.3323	2.99252	3.06751	1.16939	1.9435	0.461956			150.6	0.827272	1.39778	2.47749	3.44255	3.61015	1.81351	3.55451	1.07574		150.6	0.859752	1.73083	2.90529	3.75777	3.75837	1.81147	2.28875	0.707871		150.6	1.55302	1.8588	1.8979	1.67047	1.38551	1.31816	1.14184	0.687645		150.6	1.88565	2.25479	2.07972	2.32542	1.7187	1.15386	0.458367	-0.049801
150.8	0.796322	1.51947	2.3488	2.99916	3.07459	1.17284	1.95026	0.462388			150.8	0.826385	1.40112	2.48302	3.45305	3.61916	1.81975	3.56822	1.077		150.8	0.871773	1.73465	2.91378	3.76646	3.764	1.81849	2.29324	0.707755		150.8	1.55257	1.86391	1.89094	1.66806	1.38694	1.31414	1.13836	0.686213		150.8	1.88727	2.25605	2.0789	2.32631	1.71886	1.15454	0.459439	-0.0515271
151	0.797539	1.51664	2.35444	3.00794	3.08289	1.17616	1.95818	0.462788			151	0.829721	1.40374	2.48863	3.46505	3.6269	1.82594	3.56827	1.0758		151	0.868205	1.74015	2.92212	3.77408	3.77235	1.82483	2.29842	0.708185		151	1.55381	1.85891	1.89332	1.6703	1.38391	1.31808	1.1396	0.691349		151	1.88988	2.25789	2.07936	2.32484	1.71696	1.15406	0.457753	-0.0499312
151.2	0.800204	1.51402	2.35282	3.01218	3.0908	1.18135	1.96546	0.463873			151.2	0.832051	1.40804	2.49571	3.47409	3.63435	1.82961	3.58148	1.08294		151.2	0.872043	1.7446	2.93151	3.78355	3.77866	1.83035	2.30585	0.708747		151.2	1.5515	1.85953	1.89079	1.67127	1.38527	1.31846	1.13959	0.690873		151.2	1.8874	2.25956	2.07926	2.32515	1.71648	1.15381	0.45761	-0.0508592
151.4	0.802446	1.51554	2.3693	3.01741	3.09739	1.18555	1.97393	0.465726			151.4	0.834913	1.41339	2.50362	3.48348	3.64394	1.83349	3.58233	1.07977		151.4	0.87895	1.74817	2.93778	3.79272	3.78668	1.83631	2.3141	0.709008		151.4	1.55545	1.85859	1.89318	1.66787	1.38711	1.31808	1.14314	0.688503		151.4	1.88884	2.25994	2.07706	2.3253	1.71646	1.15394	0.460406	-0.0486458
151.6	0.804918	1.52111	2.37021	3.02227	3.10492	1.18986	1.97774	0.466213			151.6	0.836942	1.41441	2.50975	3.49251	3.65392	1.83521	3.59642	1.08667		151.6	0.873313	1.75299	2.94774	3.79928	3.79278	1.84007	2.32078	0.708239		151.6	1.55559	1.86384	1.89676	1.66965	1.3843	1.31845	1.13949	0.690693		151.6	1.88881	2.26055	2.07913	2.32558	1.71562	1.15583	0.458733	-0.0473525
151.8	0.807157	1.53259	2.36975	3.02922	3.11304	1.19365	1.9831	0.467704			151.8	0.84054	1.41897	2.5159	3.50134	3.65882	1.83827	3.59965	1.09054		151.8	0.883511	1.76073	2.95724	3.80862	3.8024	1.84389	2.32544	0.709835		151.8	1.55438	1.8636	1.89072	1.67402	1.38601	1.32	1.13663	0.692418		151.8	1.8869	2.26003	2.07933	2.3255	1.71522	1.15553	0.459739	-0.0468083
152	0.808855	1.54421	2.38703	3.0378	3.11918	1.19831	1.98623	0.468731			152	0.84404	1.42476	2.52251	3.51014	3.66601	1.84055	3.61282	1.08583		152	0.885065	1.76947	2.96479	3.81773	3.80946	1.85024	2.3302	0.710805		152	1.55604	1.85936	1.89451	1.673	1.38467	1.31819	1.14255	0.689503		152	1.8863	2.2582	2.08029	2.32745	1.71935	1.15592	0.460162	-0.0461445
152.2	0.810426	1.55136	2.39065	3.04266	3.12597	1.20215	1.99095	0.471377			152.2	0.844024	1.42843	2.53016	3.51859	3.67652	1.84781	3.61628	1.09411		152.2	0.880701	1.77485	2.97273	3.82675	3.81826	1.85404	2.33071	0.711936		152.2	1.55252	1.85871	1.89374	1.67206	1.38294	1.31878	1.13667	0.687518		152.2	1.88829	2.25613	2.07994	2.32698	1.71733	1.15654	0.459607	-0.0454153
152.4	0.811569	1.55067	2.39273	3.052	3.13532	1.20692	1.98857	0.472833			152.4	0.84729	1.42948	2.53424	3.52655	3.68312	1.85135	3.62902	1.09369		152.4	0.891134	1.77892	2.98076	3.8356	3.82522	1.86212	2.33469	0.714566		152.4	1.55811	1.85938	1.89888	1.67404	1.38727	1.3204	1.13877	0.687286		152.4	1.887	2.25629	2.0791	2.32776	1.71814	1.1561	0.459357	-0.0460311
152.6	0.81237	1.54701	2.41136	3.0604	3.14459	1.21129	1.99195	0.473509			152.6	0.847856	1.43612	2.53979	3.53662	3.69101	1.85973	3.63172	1.09326		152.6	0.89032	1.78367	2.98752	3.84653	3.8355	1.86759	2.34134	0.715027		152.6	1.55467	1.8608	1.89592	1.67144	1.38512	1.31775	1.13633	0.687324		152.6	1.8876	2.25668	2.07807	2.32689	1.71792	1.15478	0.45862	-0.0467118
152.8	0.812408	1.54577	2.41274	3.06757	3.14992	1.21232	1.99803	0.474877			152.8	0.849984	1.44124	2.54457	3.54478	3.70238	1.86431	3.6441	1.10067		152.8	0.889823	1.7851	2.99332	3.85116	3.84218	1.87534	2.34918	0.715318		152.8	1.55354	1.86081	1.89504	1.67263	1.38258	1.31541	1.14317	0.692886		152.8	1.89019	2.25596	2.07963	2.32695	1.71962	1.15493	0.457021	-0.0461401
153	0.814532	1.55	2.41671	3.07182	3.16057	1.21532	2.0001	0.477258			153	0.850141	1.44528	2.55071	3.55454	3.71169	1.8694	3.64754	1.09465		153	0.897614	1.78394	3.00138	3.85985	3.84892	1.88085	2.35645	0.715673		153	1.55601	1.85766	1.89286	1.67085	1.38616	1.32007	1.13659	0.691632		153	1.88827	2.25803	2.07942	2.32563	1.71774	1.15573	0.458423	-0.046515
153.2	0.813762	1.55888	2.42866	3.07971	3.16738	1.21914	2.00458	0.476134			153.2	0.853915	1.44993	2.55596	3.56524	3.71891	1.87056	3.65834	1.10302		153.2	0.895391	1.78554	3.01129	3.86757	3.85614	1.8875	2.36683	0.716187		153.2	1.55821	1.86137	1.90042	1.66998	1.38385	1.318	1.13817	0.691405		153.2	1.8891	2.26	2.07851	2.32666	1.72115	1.15489	0.459991	-0.0457347
153.4	0.814623	1.57016	2.42889	3.08454	3.17299	1.22178	2.01331	0.477895			153.4	0.853911	1.45505	2.56117	3.57355	3.72685	1.87588	3.66228	1.10509		153.4	0.90293	1.79152	3.0192	3.87428	3.86579	1.89147	2.37222	0.716706		153.4	1.56057	1.8584	1.89804	1.6728	1.38749	1.32073	1.13814	0.68968		153.4	1.88939	2.25981	2.07832	2.32616	1.71985	1.15547	0.460043	-0.0451591
153.6	0.814779	1.57902	2.43646	3.0917	3.18109	1.22467	2.01515	0.47732			153.6	0.859161	1.45733	2.56939	3.58352	3.73249	1.87887	3.67247	1.10251		153.6	0.906164	1.79782	3.02709	3.8828	3.87195	1.89548	2.37592	0.719548		153.6	1.5528	1.86321	1.89208	1.66991	1.3853	1.31704	1.13647	0.687469		153.6	1.88882	2.25759	2.07687	2.32629	1.71975	1.15425	0.461964	-0.0448171
153.8	0.815485	1.58038	2.44499	3.09948	3.18878	1.23041	2.0159	0.479386			153.8	0.858815	1.46013	2.57849	3.59256	3.7385	1.88242	3.67827	1.11241		153.8	0.902443	1.80358	3.03635	3.8923	3.88015	1.90295	2.37881	0.721359		153.8	1.5552	1.86297	1.8982	1.67292	1.38415	1.31848	1.13963	0.68775		153.8	1.88956	2.25856	2.07571	2.32727	1.71846	1.15481	0.461886	-0.0457172
154	0.81799	1.57831	2.44566	3.11121	3.19515	1.23546	2.02492	0.480613			154	0.862802	1.46496	2.58366	3.60193	3.74671	1.8892	3.68805	1.1108		154	0.914062	1.81269	3.04456	3.8984	3.88727	1.90702	2.38173	0.722958		154	1.55818	1.86337	1.8964	1.66728	1.38323	1.3196	1.13986	0.694466		154	1.89041	2.25608	2.07773	2.32723	1.71963	1.15488	0.461143	-0.0462349
154.2	0.822481	1.57638	2.45717	3.12358	3.20455	1.23905	2.02874	0.481239			154.2	0.863111	1.47066	2.59072	3.6102	3.75401	1.89757	3.69341	1.11345		154.2	0.911651	1.82149	3.05126	3.90622	3.89398	1.91495	2.38505	0.72558		154.2	1.55838	1.85696	1.89837	1.66752	1.38505	1.31954	1.13888	0.691433		154.2	1.89222	2.25384	2.07938	2.32587	1.71821	1.15571	0.46076	-0.0467688
154.4	0.826218	1.57982	2.46474	3.13453	3.21101	1.2425	2.03026	0.480399			154.4	0.868386	1.4758	2.59883	3.61682	3.76125	1.90196	3.70181	1.11913		154.4	0.915342	1.82352	3.06001	3.91685	3.9007	1.91778	2.39015	0.725877		154.4	1.5574	1.857	1.89701	1.67356	1.38305	1.31573	1.137	0.69078		154.4	1.8922	2.25636	2.0818	2.32672	1.71811	1.15647	0.460687	-0.0465211
154.6	0.830056	1.5891	2.46477	3.14346	3.21918	1.24894	2.03944	0.483666			154.6	0.867912	1.48252	2.6012	3.62361	3.76846	1.90776	3.7081	1.11689		154.6	0.921204	1.82903	3.06602	3.92422	3.90778	1.92481	2.399	0.729143		154.6	1.55368	1.86086	1.89592	1.66994	1.38708	1.31671	1.13682	0.688311		154.6	1.89296	2.25858	2.08413	2.32742	1.71957	1.15681	0.45959	-0.0471776
154.8	0.832528	1.60046	2.47811	3.15105	3.22788	1.2513	2.04564	0.483746			154.8	0.873135	1.48691	2.60492	3.63232	3.77456	1.91953	3.71432	1.12492		154.8	0.916996	1.83426	3.07358	3.93202	3.9171	1.92699	2.40772	0.731623		154.8	1.55607	1.8592	1.896	1.67055	1.38544	1.31588	1.1399	0.687987		154.8	1.89319	2.25851	2.08457	2.32628	1.71836	1.15723	0.459626	-0.0462242
155	0.834236	1.60889	2.48115	3.1558	3.23422	1.25473	2.04675	0.483605			155	0.872425	1.49	2.60977	3.64159	3.78057	1.92262	3.72054	1.12712		155	0.923743	1.83578	3.08146	3.9409	3.92749	1.93504	2.41566	0.733557		155	1.55919	1.86036	1.89449	1.67382	1.38329	1.31918	1.13878	0.691391		155	1.89417	2.25972	2.08218	2.32667	1.71732	1.15691	0.459891	-0.0475799
155.2	0.836168	1.61106	2.48345	3.16104	3.24304	1.25759	2.0492	0.484401			155.2	0.876849	1.49279	2.61629	3.65211	3.78671	1.92213	3.72935	1.12706		155.2	0.924465	1.83847	3.08787	3.95176	3.93703	1.93893	2.41954	0.732903		155.2	1.55546	1.85975	1.89438	1.6708	1.38634	1.32199	1.14354	0.690177		155.2	1.89176	2.26191	2.08495	2.32884	1.71962	1.15616	0.4599	-0.04978
155.4	0.839892	1.60901	2.49719	3.16941	3.24834	1.25985	2.05542	0.486318			155.4	0.875162	1.49808	2.62148	3.6614	3.79368	1.92719	3.73867	1.13228		155.4	0.92029	1.84626	3.09452	3.96023	3.94583	1.94452	2.42394	0.734742		155.4	1.55424	1.8629	1.89587	1.66835	1.38735	1.3199	1.13415	0.690497		155.4	1.89217	2.26097	2.08574	2.3283	1.71909	1.15592	0.45883	-0.0503058
155.6	0.842016	1.60956	2.50086	3.17176	3.25717	1.26245	2.05807	0.487531			155.6	0.878802	1.50012	2.62775	3.66795	3.80128	1.92886	3.74478	1.12726		155.6	0.93032	1.84988	3.10359	3.96794	3.9553	1.95004	2.42696	0.735136		155.6	1.55485	1.86391	1.89503	1.67028	1.38397	1.31418	1.13895	0.691545		155.6	1.8903	2.26043	2.08601	2.32871	1.7192	1.15747	0.460777	-0.049257
155.8	0.845625	1.61483	2.50643	3.17515	3.26407	1.26671	2.0586	0.48972			155.8	0.877031	1.50418	2.63291	3.6777	3.80968	1.92975	3.75695	1.13273		155.8	0.929341	1.8536	3.11192	3.97527	3.96346	1.95728	2.43025	0.735606		155.8	1.55476	1.8648	1.89352	1.67111	1.38081	1.31953	1.13662	0.691371		155.8	1.89058	2.26183	2.08562	2.32938	1.72122	1.1557	0.460071	-0.049503
156	0.847463	1.62375	2.51646	3.18568	3.27132	1.27031	2.06468	0.490616			156	0.881394	1.50916	2.63987	3.68617	3.81866	1.93416	3.76178	1.13563		156	0.931017	1.86344	3.1177	3.9824	3.97153	1.96236	2.4354	0.736514		156	1.55589	1.86148	1.89281	1.67268	1.38047	1.31522	1.13421	0.688218		156	1.89031	2.26142	2.08752	2.33001	1.7219	1.15527	0.459157	-0.0488399
156.2	0.85017	1.6334	2.51848	3.1905	3.27894	1.27513	2.0677	0.493558			156.2	0.88221	1.51503	2.64369	3.69625	3.82784	1.94294	3.77014	1.13167		156.2	0.936305	1.86841	3.12328	3.99168	3.97941	1.96733	2.44613	0.739338		156.2	1.56088	1.86319	1.89462	1.67427	1.38392	1.31753	1.13956	0.691852		156.2	1.89264	2.26186	2.08703	2.32751	1.72058	1.15628	0.459619	-0.0460004
156.4	0.847926	1.64051	2.52976	3.1954	3.28543	1.28084	2.07087	0.494698			156.4	0.887419	1.51905	2.65025	3.70648	3.8343	1.95004	3.77526	1.14124		156.4	0.936347	1.87408	3.1281	4.00064	3.98553	1.97674	2.45527	0.741785		156.4	1.56175	1.86123	1.8911	1.6694	1.37909	1.31652	1.13538	0.693069		156.4	1.89268	2.2608	2.08659	2.32781	1.72093	1.15663	0.45932	-0.0459905
156.6	0.852348	1.64066	2.53669	3.20709	3.29119	1.285	2.07757	0.494847			156.6	0.888738	1.52272	2.65655	3.71518	3.84314	1.95657	3.78302	1.14011		156.6	0.942355	1.87896	3.13444	4.00793	3.99389	1.98312	2.46341	0.743427		156.6	1.55646	1.86646	1.89894	1.66585	1.38739	1.31988	1.13656	0.690738		156.6	1.89539	2.26225	2.08529	2.32783	1.71974	1.15594	0.459168	-0.0466044
156.8	0.853592	1.63708	2.5393	3.21794	3.30195	1.28924	2.08578	0.494138			156.8	0.893322	1.52617	2.66366	3.7236	3.85168	1.96079	3.78846	1.14111		156.8	0.945852	1.88391	3.14298	4.01597	4.00033	1.98881	2.46952	0.745916		156.8	1.55561	1.86462	1.8976	1.67162	1.38675	1.31659	1.13836	0.68832		156.8	1.89449	2.26195	2.08652	2.32738	1.7196	1.1569	0.459593	-0.0468146
157	0.853679	1.63663	2.55332	3.22393	3.30745	1.2946	2.08496	0.494079			157	0.893233	1.52927	2.66937	3.73216	3.85814	1.96718	3.79993	1.14726		157	0.948844	1.8855	3.15194	4.02625	4.00489	1.9936	2.47494	0.748385		157	1.55622	1.85941	1.89598	1.66975	1.38818	1.31733	1.1365	0.690253		157	1.89502	2.26341	2.086	2.32747	1.71946	1.15829	0.459042	-0.046341
157.2	0.85523	1.64415	2.55651	3.23484	3.31733	1.29724	2.08835	0.494547			157.2	0.896157	1.53149	2.67656	3.73995	3.8649	1.97297	3.80463	1.14609		157.2	0.954244	1.89159	3.16296	4.03379	4.01113	2.00124	2.4753	0.750234		157.2	1.55709	1.8644	1.89336	1.67468	1.3835	1.3163	1.14098	0.692814		157.2	1.89488	2.26216	2.08581	2.32965	1.71776	1.15865	0.457968	-0.0464878
157.4	0.859968	1.65516	2.55947	3.24008	3.32451	1.30075	2.09587	0.494618			157.4	0.895966	1.53479	2.67946	3.74995	3.87264	1.97996	3.81445	1.15166		157.4	0.953264	1.8956	3.17246	4.04178	4.01698	2.00592	2.48047	0.749709		157.4	1.55751	1.86556	1.89742	1.66782	1.3845	1.31484	1.13614	0.692339		157.4	1.8954	2.26249	2.08654	2.32828	1.71889	1.15789	0.457117	-0.0453923
157.6	0.85908	1.66525	2.57344	3.24505	3.33197	1.30457	2.09935	0.495071			157.6	0.899858	1.53863	2.68706	3.76062	3.88001	1.98633	3.82137	1.15527		157.6	0.956156	1.90061	3.18027	4.05036	4.02397	2.01224	2.4844	0.750863		157.6	1.5554	1.86008	1.8946	1.67404	1.38204	1.31508	1.13468	0.690376		157.6	1.8945	2.26225	2.08712	2.32914	1.72059	1.15795	0.455038	-0.0445719
157.8	0.861831	1.67131	2.57565	3.24776	3.34157	1.3089	2.102	0.495504			157.8	0.900711	1.54373	2.69149	3.76765	3.88578	1.99216	3.83148	1.15224		157.8	0.957693	1.90752	3.18572	4.05817	4.02965	2.01698	2.49032	0.752522		157.8	1.55718	1.86725	1.89772	1.67001	1.38233	1.31908	1.13708	0.691163		157.8	1.89585	2.26263	2.0863	2.32925	1.71834	1.15828	0.456155	-0.0431913
158	0.863972	1.67248	2.58139	3.25265	3.34707	1.31171	2.10854	0.497583			158	0.904451	1.5461	2.69727	3.77713	3.89222	2.00163	3.83417	1.15993		158	0.959585	1.91196	3.19142	4.06508	4.03974	2.02305	2.4973	0.752625		158	1.55424	1.85775	1.89809	1.67043	1.38433	1.31244	1.13558	0.694105		158	1.89627	2.2613	2.08814	2.32853	1.7178	1.15898	0.456359	-0.0424425
158.2	0.861285	1.66856	2.59349	3.25912	3.35392	1.31665	2.11409	0.49792			158.2	0.905724	1.54951	2.70179	3.78672	3.8998	2.00887	3.84254	1.15656		158.2	0.960151	1.91435	3.19711	4.07402	4.04703	2.02836	2.50776	0.754203		158.2	1.5591	1.86442	1.89571	1.67103	1.38187	1.3169	1.13773	0.69077		158.2	1.89559	2.26205	2.08702	2.32855	1.72068	1.15741	0.456598	-0.0469774
158.4	0.859814	1.6684	2.59291	3.26695	3.36279	1.32032	2.11813	0.499854			158.4	0.909234	1.55266	2.70954	3.7958	3.90781	2.01301	3.84633	1.1626		158.4	0.965808	1.92158	3.20508	4.08456	4.05815	2.03222	2.51318	0.756918		158.4	1.5579	1.86105	1.89498	1.66483	1.37982	1.31743	1.13725	0.694991		158.4	1.8977	2.26247	2.08652	2.3305	1.71902	1.15783	0.456483	-0.0473669
158.6	0.859418	1.67699	2.6021	3.27699	3.36969	1.32562	2.11889	0.502142			158.6	0.908568	1.56005	2.71389	3.80421	3.91386	2.01857	3.8541	1.16577		158.6	0.967084	1.92506	3.21466	4.09229	4.06533	2.03786	2.51929	0.758656		158.6	1.5588	1.86289	1.89954	1.6701	1.38246	1.3214	1.13702	0.691164		158.6	1.89831	2.26173	2.08838	2.33032	1.71673	1.1587	0.45991	-0.0470858
158.8	0.857543	1.68694	2.6116	3.28568	3.37633	1.32926	2.12665	0.503561			158.8	0.912608	1.56366	2.72206	3.81192	3.92517	2.02429	3.85858	1.16266		158.8	0.96907	1.93123	3.22322	4.09822	4.07043	2.04777	2.52443	0.758188		158.8	1.56323	1.86357	1.89694	1.66856	1.38483	1.3115	1.13654	0.691475		158.8	1.89702	2.26116	2.08799	2.3312	1.72073	1.15744	0.459918	-0.0508483
159	0.858547	1.69675	2.60983	3.29267	3.38271	1.33131	2.13384	0.504535			159	0.91423	1.56995	2.72904	3.81927	3.93018	2.02584	3.86915	1.17216		159	0.973177	1.93736	3.23088	4.10736	4.07493	2.05356	2.52841	0.760881		159	1.56169	1.86039	1.8976	1.66927	1.38398	1.31551	1.13467	0.688218		159	1.89665	2.26315	2.08828	2.33175	1.7207	1.15703	0.461321	-0.0501517
159.2	0.863745	1.70078	2.62261	3.29775	3.39218	1.33413	2.14222	0.506571			159.2	0.917095	1.57545	2.73689	3.827	3.93716	2.03151	3.87442	1.1715		159.2	0.975586	1.9438	3.2389	4.11798	4.08136	2.05845	2.53328	0.761076		159.2	1.5599	1.86147	1.89853	1.67007	1.38038	1.31172	1.13571	0.691824		159.2	1.89796	2.26291	2.08929	2.33144	1.7179	1.15812	0.462	-0.0462754
159.4	0.866006	1.69988	2.62961	3.3059	3.39884	1.3397	2.1458	0.507159			159.4	0.918018	1.57951	2.74527	3.8358	3.94433	2.0344	3.88434	1.17665		159.4	0.978175	1.94488	3.24424	4.1232	4.08581	2.06718	2.53613	0.762515		159.4	1.56483	1.86168	1.89701	1.66877	1.38511	1.31042	1.13807	0.692594		159.4	1.89691	2.26553	2.09058	2.33109	1.71796	1.15794	0.461864	-0.0463418
159.6	0.8704	1.69689	2.62948	3.31641	3.40524	1.3418	2.15763	0.506542			159.6	0.920916	1.58236	2.75196	3.84819	3.95202	2.03735	3.89084	1.1823		159.6	0.981043	1.95227	3.2483	4.13154	4.09021	2.07247	2.54452	0.763009		159.6	1.56041	1.86141	1.89652	1.66604	1.38202	1.31405	1.13661	0.689143		159.6	1.89788	2.26842	2.09042	2.33122	1.718	1.1571	0.459524	-0.0469811
159.8	0.873987	1.69945	2.64257	3.32659	3.41479	1.34779	2.1619	0.507423			159.8	0.921027	1.58775	2.7563	3.85577	3.95755	2.04123	3.89973	1.1808		159.8	0.983832	1.9546	3.25683	4.14163	4.09722	2.07397	2.55134	0.765442		159.8	1.56093	1.86232	1.89611	1.67044	1.38341	1.31758	1.13044	0.695128		159.8	1.89786	2.26831	2.09119	2.3317	1.71628	1.15762	0.457799	-0.0427828
160	0.876948	1.70645	2.64743	3.33431	3.42241	1.3532	2.164	0.509509			160	0.922119	1.59254	2.76041	3.86374	3.96809	2.04482	3.90429	1.18567		160	0.984008	1.9591	3.26522	4.15269	4.10541	2.07968	2.55504	0.766133		160	1.56348	1.86893	1.89445	1.66945	1.38025	1.31333	1.13417	0.693915		160	1.89787	2.26723	2.0889	2.3318	1.71495	1.15678	0.45809	-0.0443601
160.2	0.880415	1.71744	2.64903	3.34393	3.42825	1.35774	2.16432	0.511645			160.2	0.92281	1.59658	2.76544	3.87318	3.97536	2.0461	3.91241	1.18652		160.2	0.985354	1.96487	3.27428	4.15907	4.11301	2.08563	2.56118	0.768639		160.2	1.56393	1.86178	1.89619	1.67071	1.37662	1.31329	1.13868	0.688412		160.2	1.89755	2.26924	2.08967	2.33148	1.71493	1.15653	0.457944	-0.0438788
160.4	0.883054	1.72488	2.66309	3.3498	3.43759	1.36057	2.16951	0.512551			160.4	0.925252	1.59991	2.76957	3.88223	3.98385	2.05164	3.91907	1.18234		160.4	0.988818	1.96951	3.28212	4.16716	4.12048	2.09147	2.5675	0.769285		160.4	1.55998	1.86252	1.896	1.66632	1.38345	1.31443	1.13538	0.69406		160.4	1.89906	2.26626	2.08876	2.33152	1.71522	1.15671	0.457748	-0.0445994
160.6	0.885285	1.72733	2.66406	3.3564	3.44341	1.36507	2.16882	0.516029			160.6	0.928857	1.60372	2.77547	3.89191	3.99216	2.05818	3.92557	1.18663		160.6	0.990775	1.97134	3.29301	4.17405	4.1303	2.09801	2.57161	0.772071		160.6	1.56235	1.86463	1.8985	1.67383	1.38627	1.31526	1.13171	0.692514		160.6	1.89792	2.26361	2.08726	2.33089	1.71506	1.1587	0.45681	-0.045693
160.8	0.890999	1.72636	2.67227	3.36077	3.45149	1.36735	2.17167	0.518283			160.8	0.930539	1.60766	2.78012	3.90065	3.99955	2.06471	3.93133	1.18675		160.8	0.994253	1.97688	3.29991	4.18306	4.13843	2.10414	2.57477	0.773791		160.8	1.5597	1.86478	1.89502	1.66983	1.37919	1.31419	1.13268	0.688491		160.8	1.89962	2.26374	2.08915	2.33107	1.71493	1.15835	0.458835	-0.0458271
161	0.895839	1.72549	2.68057	3.36678	3.45946	1.37052	2.17407	0.518914			161	0.933061	1.61225	2.78665	3.9054	4.00632	2.07225	3.93881	1.19064		161	0.999045	1.98614	3.30817	4.19088	4.14719	2.10763	2.58079	0.774254		161	1.55836	1.863	1.89608	1.66961	1.38252	1.31673	1.13488	0.690711		161	1.9017	2.26475	2.09133	2.33172	1.71861	1.15894	0.456087	-0.0445686
161.2	0.895541	1.73072	2.68269	3.3739	3.46404	1.37267	2.1783	0.518428			161.2	0.936106	1.61495	2.79171	3.91405	4.01479	2.07951	3.9461	1.194		161.2	0.999085	1.99202	3.31524	4.19869	4.15488	2.11169	2.58559	0.774629		161.2	1.56105	1.86746	1.89802	1.67179	1.38236	1.30852	1.13493	0.691487		161.2	1.89941	2.2634	2.09037	2.33109	1.71881	1.15951	0.455133	-0.0449216
161.4	0.897404	1.74155	2.69343	3.38095	3.47277	1.37686	2.18502	0.518293			161.4	0.939041	1.62069	2.79767	3.92227	4.02081	2.0857	3.95219	1.19511		161.4	1.00363	1.99816	3.32631	4.20469	4.16371	2.11735	2.5934	0.777292		161.4	1.55973	1.86908	1.90085	1.67122	1.38037	1.31289	1.13516	0.685135		161.4	1.89731	2.26414	2.09006	2.33078	1.72055	1.15848	0.457172	-0.0438944
161.6	0.898642	1.75464	2.70179	3.38434	3.47913	1.37965	2.19206	0.517612			161.6	0.941035	1.62545	2.80125	3.93117	4.02785	2.09353	3.96075	1.19853		161.6	1.00258	2.00827	3.33353	4.21393	4.16997	2.12253	2.60264	0.778044		161.6	1.56112	1.85957	1.8948	1.66841	1.38329	1.31843	1.13604	0.693155		161.6	1.89928	2.2656	2.0922	2.3311	1.72175	1.1574	0.458465	-0.0428404
161.8	0.898677	1.76173	2.70181	3.39095	3.487	1.38325	2.19683	0.518408			161.8	0.94423	1.62953	2.80692	3.94331	4.03475	2.10029	3.96943	1.19968		161.8	1.00619	2.01426	3.34233	4.22172	4.17974	2.12681	2.6103	0.780412		161.8	1.56305	1.86215	1.89545	1.67009	1.38234	1.31379	1.13963	0.687855		161.8	1.89816	2.26514	2.09078	2.33012	1.72146	1.15793	0.459787	-0.0449279
162	0.898178	1.76259	2.71607	3.39978	3.49447	1.38669	2.2093	0.519974			162	0.947578	1.63341	2.81085	3.95145	4.04184	2.10611	3.97715	1.20456		162	1.00775	2.01457	3.34977	4.22996	4.18684	2.13621	2.61798	0.782595		162	1.55755	1.86394	1.9014	1.66795	1.3798	1.30762	1.13535	0.689231		162	1.89821	2.26569	2.09085	2.33038	1.71883	1.15809	0.461947	-0.0458445
162.2	0.900217	1.75929	2.72067	3.40582	3.50125	1.39108	2.21696	0.521489			162.2	0.948683	1.63784	2.81634	3.95624	4.0488	2.10919	3.98289	1.20699		162.2	1.01192	2.02022	3.35603	4.23626	4.19254	2.14471	2.62062	0.784158		162.2	1.56192	1.8635	1.89229	1.66999	1.37974	1.31276	1.137	0.690294		162.2	1.90023	2.26691	2.09031	2.3305	1.71967	1.15737	0.462576	-0.0456399
162.4	0.90389	1.75833	2.7219	3.41135	3.50995	1.3956	2.22139	0.524098			162.4	0.950067	1.64282	2.82181	3.96469	4.05824	2.10951	3.99156	1.20662		162.4	1.01671	2.02307	3.36281	4.24328	4.19898	2.14971	2.62217	0.784054		162.4	1.56382	1.86323	1.8965	1.67015	1.3818	1.31111	1.13493	0.692432		162.4	1.89993	2.26824	2.09036	2.33066	1.7182	1.15828	0.464245	-0.0471889
162.6	0.906287	1.76312	2.7372	3.42015	3.51616	1.40052	2.2236	0.523274			162.6	0.950671	1.64609	2.82639	3.97282	4.06413	2.11025	3.99681	1.21107		162.6	1.01633	2.02281	3.3689	4.25064	4.20648	2.15686	2.62455	0.784727		162.6	1.56075	1.86309	1.89828	1.66701	1.38282	1.31679	1.13379	0.687703		162.6	1.89806	2.26741	2.08882	2.33044	1.7197	1.15785	0.463442	-0.0481664
162.8	0.909225	1.7731	2.73866	3.42663	3.52278	1.40504	2.22641	0.525468			162.8	0.953617	1.6483	2.83273	3.98129	4.07262	2.11018	4.00525	1.21342		162.8	1.02147	2.02705	3.37672	4.25967	4.2117	2.16521	2.62813	0.787292		162.8	1.56067	1.86555	1.89612	1.67246	1.37918	1.31298	1.13698	0.688393		162.8	1.89983	2.26897	2.09064	2.32998	1.72162	1.15899	0.464082	-0.0479304
163	0.912045	1.78373	2.74268	3.43057	3.53245	1.41062	2.22795	0.524984			163	0.955172	1.65076	2.84028	3.9915	4.07965	2.11618	4.01189	1.21485		163	1.0246	2.02966	3.38249	4.26979	4.21569	2.16889	2.63192	0.79005		163	1.56602	1.86796	1.89593	1.66918	1.38368	1.32042	1.13865	0.691986		163	1.89924	2.26824	2.09006	2.32905	1.72257	1.15883	0.463816	-0.0467205
163.2	0.916	1.79097	2.75479	3.43838	3.53818	1.4156	2.22969	0.526021			163.2	0.957785	1.65641	2.84329	3.9995	4.08547	2.12172	4.02034	1.21801		163.2	1.02515	2.03254	3.38954	4.27773	4.22286	2.1726	2.64117	0.791825		163.2	1.56317	1.86575	1.89687	1.66884	1.37926	1.31221	1.14144	0.6923		163.2	1.90026	2.26741	2.09061	2.32998	1.72239	1.15905	0.46222	-0.0475648
163.4	0.915122	1.79031	2.75721	3.44622	3.54464	1.41909	2.23228	0.526581			163.4	0.959117	1.66097	2.84785	4.00694	4.09142	2.13217	4.02337	1.22187		163.4	1.02962	2.04014	3.39589	4.28358	4.23034	2.17872	2.65094	0.794443		163.4	1.56162	1.86557	1.89325	1.6685	1.38442	1.31846	1.13595	0.691773		163.4	1.90271	2.26786	2.09254	2.32989	1.72296	1.15818	0.460077	-0.0460405
163.6	0.918414	1.7903	2.76523	3.45187	3.55393	1.42469	2.23776	0.529782			163.6	0.961806	1.66547	2.85378	4.01555	4.09898	2.13918	4.03365	1.22416		163.6	1.03022	2.04899	3.40396	4.29072	4.23831	2.181	2.65898	0.797342		163.6	1.55922	1.86516	1.89216	1.66689	1.38134	1.31504	1.13589	0.691552		163.6	1.90584	2.26834	2.0935	2.33067	1.72052	1.15801	0.462807	-0.0455371
163.8	0.920008	1.79024	2.77575	3.45867	3.56072	1.42743	2.24019	0.531431			163.8	0.962186	1.67093	2.85915	4.02555	4.10388	2.1469	4.0379	1.22726		163.8	1.03612	2.05599	3.40906	4.30033	4.24515	2.18593	2.66622	0.798617		163.8	1.55866	1.86694	1.89904	1.66864	1.38299	1.31658	1.13647	0.686151		163.8	1.90488	2.26889	2.09244	2.33222	1.72008	1.15668	0.460181	-0.0446615
164	0.921239	1.79765	2.77791	3.46976	3.56929	1.43158	2.24659	0.533486			164	0.96299	1.67701	2.86345	4.03524	4.11182	2.15094	4.04698	1.22906		164	1.03579	2.06583	3.41765	4.30639	4.25393	2.19054	2.67214	0.799507		164	1.56072	1.86314	1.89671	1.6664	1.3781	1.31384	1.13512	0.693537		164	1.90499	2.27115	2.09187	2.33303	1.72047	1.15589	0.458375	-0.04639
164.2	0.922204	1.80804	2.79071	3.47394	3.57656	1.43357	2.25213	0.533537			164.2	0.965576	1.68011	2.87141	4.04182	4.12025	2.15821	4.05049	1.22993		164.2	1.03895	2.07289	3.42285	4.31282	4.26067	2.20072	2.67338	0.801124		164.2	1.56059	1.86472	1.90315	1.66551	1.38018	1.31687	1.13698	0.689948		164.2	1.90491	2.27153	2.09275	2.33198	1.72011	1.1553	0.46034	-0.0460318
164.4	0.92606	1.8193	2.79625	3.48199	3.58332	1.43764	2.25408	0.534859			164.4	0.966026	1.68362	2.87581	4.04932	4.128	2.16108	4.06147	1.2337		164.4	1.04279	2.07527	3.42976	4.32099	4.26387	2.20911	2.67635	0.802913		164.4	1.55738	1.86418	1.8917	1.66914	1.37936	1.31273	1.13397	0.69179		164.4	1.9031	2.26919	2.09004	2.33117	1.72127	1.15641	0.460048	-0.045294
164.6	0.926132	1.82347	2.79692	3.48908	3.5916	1.44371	2.2589	0.536665			164.6	0.970496	1.68779	2.88197	4.05774	4.13402	2.16563	4.0632	1.23179		164.6	1.04269	2.07726	3.43579	4.33263	4.26932	2.21734	2.6805	0.803603		164.6	1.56271	1.86193	1.89857	1.67038	1.38393	1.31162	1.13647	0.689711		164.6	1.90113	2.27046	2.08975	2.33061	1.72285	1.15663	0.460391	-0.0450411
164.8	0.927238	1.82424	2.80935	3.49472	3.59689	1.44575	2.265	0.536782			164.8	0.971897	1.69277	2.88728	4.06617	4.14284	2.16787	4.07439	1.23674		164.8	1.04806	2.07754	3.44235	4.34257	4.27785	2.22417	2.68463	0.804871		164.8	1.56494	1.8699	1.8959	1.66686	1.38078	1.31429	1.131	0.688493		164.8	1.90136	2.27196	2.09036	2.33024	1.72252	1.15658	0.460614	-0.0466883
165	0.931945	1.81996	2.81195	3.4995	3.60406	1.45013	2.26843	0.536071			165	0.976204	1.69617	2.89254	4.07431	4.1481	2.17334	4.07682	1.23712		165	1.04484	2.07833	3.44899	4.34924	4.28259	2.23154	2.69153	0.805468		165	1.55966	1.8679	1.89478	1.66875	1.38558	1.30985	1.1349	0.692381		165	1.90106	2.26974	2.09214	2.33031	1.72276	1.15717	0.462176	-0.0452826
165.2	0.934468	1.81977	2.81426	3.50731	3.61051	1.45592	2.27162	0.538375			165.2	0.976695	1.70013	2.89699	4.08324	4.15338	2.17761	4.08828	1.23963		165.2	1.05231	2.08054	3.45705	4.35512	4.28926	2.23304	2.70029	0.805844		165.2	1.56249	1.86838	1.90229	1.67005	1.37612	1.31471	1.13425	0.691995		165.2	1.90197	2.27061	2.08977	2.33031	1.7226	1.1571	0.462669	-0.0444406
165.4	0.938878	1.8265	2.82666	3.51197	3.61587	1.4594	2.27595	0.538861			165.4	0.980794	1.70514	2.90232	4.0909	4.15902	2.18323	4.09085	1.24524		165.4	1.05359	2.08695	3.46623	4.36051	4.29786	2.23567	2.70843	0.806001		165.4	1.56164	1.86802	1.89699	1.66436	1.37998	1.31654	1.13679	0.689618		165.4	1.90362	2.27162	2.09323	2.33138	1.72242	1.15778	0.464364	-0.0464008
165.6	0.940358	1.83685	2.83059	3.52109	3.6253	1.4623	2.28206	0.539644			165.6	0.980267	1.70933	2.9065	4.09967	4.16734	2.19045	4.10336	1.24466		165.6	1.05595	2.09289	3.47204	4.36877	4.30415	2.24203	2.71715	0.806319		165.6	1.5667	1.86744	1.90032	1.66931	1.38012	1.31509	1.13117	0.686875		165.6	1.90436	2.27232	2.09314	2.33203	1.72049	1.1576	0.463959	-0.047681
165.8	0.938093	1.84637	2.83787	3.53123	3.6324	1.46828	2.289	0.539603			165.8	0.981511	1.71292	2.90979	4.1082	4.17033	2.19952	4.10524	1.25141		165.8	1.063	2.09804	3.48179	4.37792	4.3084	2.24795	2.72333	0.806179		165.8	1.56291	1.86666	1.89938	1.66757	1.38076	1.31384	1.13434	0.689234		165.8	1.90622	2.27093	2.09358	2.33164	1.72141	1.1578	0.46518	-0.0457356
166	0.93604	1.85128	2.84665	3.54009	3.63984	1.47058	2.29169	0.541217			166	0.983241	1.71744	2.9158	4.11582	4.1781	2.20604	4.11567	1.25101		166	1.06176	2.10266	3.48929	4.38541	4.31888	2.25224	2.72889	0.807763		166	1.56594	1.86859	1.89923	1.67016	1.37898	1.31355	1.13586	0.691117		166	1.90757	2.27164	2.0927	2.33083	1.72135	1.15773	0.465033	-0.0460091
166.2	0.936155	1.85202	2.84596	3.54753	3.64914	1.47513	2.29603	0.541096			166.2	0.984357	1.72192	2.91931	4.12452	4.18417	2.20988	4.11479	1.255		166.2	1.06686	2.1084	3.49716	4.39218	4.32482	2.25762	2.73043	0.809925		166.2	1.55943	1.86556	1.89662	1.66669	1.38025	1.3108	1.13199	0.693898		166.2	1.90677	2.27303	2.09613	2.3329	1.72237	1.15846	0.462081	-0.046893
166.4	0.935196	1.84956	2.85755	3.55284	3.65444	1.47933	2.30426	0.543291			166.4	0.986605	1.72383	2.92415	4.13103	4.19093	2.21596	4.12662	1.25886		166.4	1.06634	2.11212	3.50314	4.40197	4.33298	2.26513	2.73312	0.811257		166.4	1.56421	1.86333	1.90031	1.66991	1.38145	1.31225	1.13625	0.693129		166.4	1.90705	2.27391	2.09487	2.33353	1.72242	1.15795	0.461935	-0.0461447
166.6	0.934661	1.85278	2.86259	3.55487	3.66156	1.48324	2.30754	0.544932			166.6	0.988124	1.72787	2.929	4.13959	4.19807	2.22112	4.12494	1.25763		166.6	1.06662	2.11903	3.5101	4.41178	4.34088	2.26934	2.73599	0.813538		166.6	1.56357	1.86288	1.89339	1.66584	1.38256	1.31282	1.12677	0.696244		166.6	1.90776	2.27215	2.09779	2.33387	1.72261	1.15813	0.461532	-0.0460783
166.8	0.938687	1.86034	2.86345	3.56031	3.66999	1.48769	2.31165	0.547182			166.8	0.994003	1.73306	2.93302	4.14886	4.20669	2.22584	4.13916	1.2648		166.8	1.07318	2.12566	3.51402	4.41707	4.34857	2.2746	2.74197	0.813725		166.8	1.5594	1.86417	1.90184	1.66652	1.38025	1.31365	1.13173	0.691112		166.8	1.90646	2.27213	2.09689	2.3347	1.72165	1.15857	0.460511	-0.0460025
167	0.941889	1.87017	2.8784	3.56681	3.67527	1.49178	2.31657	0.548151			167	0.993372	1.73753	2.93572	4.1605	4.21285	2.22959	4.14131	1.26036		167	1.07095	2.12739	3.52118	4.42219	4.35246	2.28213	2.74683	0.815285		167	1.56463	1.86406	1.90123	1.66489	1.3788	1.3128	1.13259	0.689738		167	1.90621	2.27169	2.09749	2.33576	1.72083	1.15805	0.46032	-0.0470722
167.2	0.944434	1.87684	2.88367	3.57592	3.6838	1.49431	2.32156	0.550363			167.2	0.998553	1.74087	2.94077	4.1688	4.22038	2.235	4.15444	1.26642		167.2	1.0774	2.13182	3.52803	4.42848	4.36143	2.28853	2.7569	0.816025		167.2	1.56416	1.86357	1.8988	1.66532	1.38041	1.31414	1.13205	0.689193		167.2	1.90655	2.2713	2.09676	2.33369	1.72288	1.15864	0.461524	-0.0476836
167.4	0.944545	1.88042	2.88701	3.58744	3.68978	1.49816	2.31994	0.552106			167.4	0.99965	1.74741	2.946	4.17626	4.2267	2.23845	4.15607	1.26676		167.4	1.07577	2.14067	3.53583	4.43605	4.36814	2.29359	2.76612	0.816585		167.4	1.56205	1.8664	1.89905	1.66812	1.37903	1.31497	1.13149	0.693564		167.4	1.90743	2.27118	2.09739	2.33422	1.72341	1.15798	0.45915	-0.0486678
167.6	0.952154	1.87839	2.90046	3.59637	3.6955	1.50043	2.32044	0.55332			167.6	1.00327	1.75187	2.9492	4.18397	4.233	2.24231	4.16932	1.26976		167.6	1.0832	2.14188	3.54379	4.44317	4.37237	2.29811	2.77389	0.818763		167.6	1.56446	1.8656	1.89906	1.66893	1.38115	1.31335	1.13674	0.687873		167.6	1.90786	2.27224	2.09529	2.33401	1.72404	1.1589	0.458743	-0.0476687
167.8	0.954633	1.87807	2.90315	3.60098	3.70288	1.50512	2.32415	0.553521			167.8	1.00184	1.75604	2.95419	4.19318	4.24024	2.24577	4.17001	1.27817		167.8	1.08484	2.14367	3.55318	4.45076	4.38022	2.30314	2.77862	0.821915		167.8	1.56105	1.86603	1.89392	1.66371	1.37855	1.31436	1.1355	0.689848		167.8	1.90832	2.27197	2.09595	2.33311	1.7247	1.15806	0.458571	-0.0480612
168	0.956685	1.88506	2.91077	3.60609	3.70728	1.50889	2.33009	0.556825			168	1.00688	1.76073	2.95653	4.19927	4.24714	2.25092	4.18095	1.27206		168	1.08571	2.15281	3.56004	4.45724	4.39014	2.30934	2.78174	0.823507		168	1.56579	1.86688	1.8955	1.66928	1.37708	1.31378	1.13697	0.686447		168	1.90889	2.27345	2.09639	2.33338	1.72484	1.15935	0.457186	-0.0464015
168.2	0.959545	1.8957	2.91712	3.61126	3.71591	1.51265	2.33542	0.5581			168.2	1.00862	1.76605	2.96058	4.20738	4.25333	2.25848	4.18262	1.2821		168.2	1.09503	2.15804	3.5674	4.46513	4.39538	2.31551	2.78616	0.824604		168.2	1.5661	1.87182	1.89912	1.66815	1.38225	1.31173	1.13127	0.693433		168.2	1.90795	2.27339	2.09537	2.33465	1.72354	1.16017	0.459614	-0.046201
168.4	0.961702	1.90425	2.91984	3.61553	3.72468	1.51756	2.34219	0.560087			168.4	1.01035	1.76825	2.96382	4.21477	4.26153	2.26662	4.19132	1.27522		168.4	1.092	2.16218	3.57297	4.47532	4.4012	2.31942	2.78669	0.826189		168.4	1.56474	1.86504	1.8981	1.66813	1.37793	1.31076	1.14058	0.689253		168.4	1.9065	2.27348	2.09386	2.33542	1.72195	1.16071	0.459582	-0.0461728
168.6	0.961604	1.90908	2.93033	3.62192	3.72979	1.52104	2.35043	0.559541			168.6	1.01305	1.774	2.96731	4.22169	4.26495	2.27127	4.19467	1.28363		168.6	1.09924	2.1696	3.58027	4.48607	4.41117	2.32723	2.79138	0.825484		168.6	1.56457	1.86812	1.89634	1.66495	1.37968	1.30875	1.1367	0.693519		168.6	1.90647	2.27442	2.09362	2.33549	1.72185	1.16082	0.459307	-0.0455918
168.8	0.964197	1.91002	2.93494	3.63406	3.74002	1.52494	2.35542	0.561352			168.8	1.01612	1.77836	2.972	4.22931	4.27226	2.27595	4.20627	1.28656		168.8	1.09502	2.17871	3.58648	4.4902	4.41682	2.33238	2.79877	0.827157		168.8	1.56788	1.86954	1.89559	1.66573	1.38015	1.31152	1.13343	0.693507		168.8	1.90825	2.27532	2.09443	2.3357	1.72174	1.16207	0.46011	-0.0458822
169	0.964171	1.90846	2.93815	3.64264	3.74593	1.53094	2.35704	0.560826			169	1.01712	1.78097	2.97899	4.23746	4.27692	2.28354	4.21086	1.28569		169	1.10144	2.18429	3.59467	4.49735	4.42287	2.33731	2.80892	0.828313		169	1.56248	1.86655	1.90157	1.67269	1.37885	1.31197	1.13291	0.690842		169	1.90675	2.27485	2.09431	2.33638	1.72298	1.16146	0.461275	-0.0490811
169.2	0.963854	1.91006	2.95012	3.64985	3.75192	1.53596	2.3596	0.561889			169.2	1.01786	1.78475	2.98412	4.24666	4.28174	2.28654	4.21999	1.29595		169.2	1.1036	2.19046	3.60027	4.50509	4.42977	2.3449	2.81536	0.829962		169.2	1.5658	1.86869	1.89762	1.67318	1.38091	1.30901	1.13353	0.693398		169.2	1.90693	2.27389	2.09628	2.33676	1.72398	1.15937	0.460728	-0.049669
169.4	0.970415	1.91861	2.95226	3.65523	3.75824	1.54	2.36319	0.560857			169.4	1.02238	1.79077	2.98972	4.25626	4.28902	2.29148	4.22448	1.28979		169.4	1.10182	2.1908	3.60895	4.51137	4.43748	2.35296	2.8239	0.829593		169.4	1.56292	1.86788	1.89898	1.66418	1.38087	1.31225	1.13281	0.692829		169.4	1.90816	2.27382	2.09621	2.33645	1.72457	1.16044	0.462694	-0.0498426
169.6	0.969799	1.92804	2.96266	3.6617	3.7634	1.54563	2.36418	0.560734			169.6	1.02437	1.79355	2.9959	4.26179	4.29812	2.29766	4.23152	1.29928		169.6	1.11232	2.19808	3.61537	4.51564	4.44322	2.35876	2.83002	0.83025		169.6	1.5636	1.86549	1.89959	1.66798	1.38362	1.31068	1.13602	0.687674		169.6	1.9071	2.27205	2.09787	2.33685	1.72771	1.15833	0.462688	-0.0493792
169.8	0.970626	1.93448	2.97044	3.66535	3.77333	1.54951	2.36501	0.560911			169.8	1.02923	1.79834	3.00153	4.27017	4.30558	2.30449	4.23635	1.29262		169.8	1.10956	2.20293	3.62233	4.52258	4.44881	2.36548	2.83343	0.831699		169.8	1.5681	1.86915	1.89617	1.66792	1.37642	1.31473	1.13159	0.689779		169.8	1.90567	2.27329	2.09891	2.33655	1.72626	1.15835	0.463215	-0.0486919
170	0.975188	1.93563	2.97212	3.67233	3.78089	1.55286	2.36792	0.562267			170	1.03014	1.8016	3.00732	4.27683	4.31475	2.30995	4.24286	1.30287		170	1.11713	2.20886	3.62574	4.52867	4.45616	2.37132	2.83694	0.830476		170	1.56531	1.87221	1.9007	1.66877	1.37824	1.30756	1.13449	0.689594		170	1.90681	2.2753	2.09814	2.33505	1.72561	1.15809	0.464046	-0.0475854
170.2	0.978159	1.93456	2.9826	3.67737	3.78589	1.55524	2.37318	0.564222			170.2	1.03465	1.80546	3.0138	4.28667	4.32621	2.31695	4.24963	1.30432		170.2	1.11502	2.21355	3.63444	4.53739	4.46299	2.37638	2.84057	0.831965		170.2	1.56391	1.86904	1.8964	1.66605	1.37703	1.31174	1.13129	0.691293		170.2	1.90814	2.27652	2.09486	2.33492	1.72635	1.1595	0.461499	-0.0467175
170.4	0.977408	1.93601	2.98938	3.68994	3.79609	1.55678	2.38037	0.565099			170.4	1.0351	1.80911	3.01946	4.29517	4.33184	2.31829	4.25468	1.30552		170.4	1.12093	2.22359	3.64183	4.54536	4.46653	2.38418	2.84674	0.834193		170.4	1.56801	1.86526	1.89988	1.66841	1.37697	1.31558	1.13485	0.691091		170.4	1.90726	2.27731	2.0977	2.3356	1.7245	1.15922	0.460331	-0.0453588
170.6	0.982341	1.94386	2.99201	3.69733	3.80168	1.56041	2.38442	0.565045			170.6	1.03872	1.81275	3.02589	4.30101	4.33843	2.32224	4.26314	1.31492		170.6	1.12575	2.22741	3.64864	4.55349	4.47083	2.38791	2.8524	0.836027		170.6	1.5644	1.86779	1.89858	1.66829	1.37721	1.31491	1.13505	0.688611		170.6	1.90887	2.2786	2.09639	2.33587	1.72096	1.16069	0.45808	-0.0469641
170.8	0.986365	1.95414	3.00184	3.70351	3.80674	1.5652	2.39056	0.565912			170.8	1.03862	1.81578	3.03346	4.30798	4.34437	2.32341	4.26771	1.30696		170.8	1.12068	2.2327	3.65681	4.5594	4.47875	2.39403	2.85913	0.835997		170.8	1.56429	1.86874	1.90327	1.666	1.38318	1.31133	1.1293	0.692028		170.8	1.90958	2.27726	2.09364	2.3364	1.72196	1.1608	0.456328	-0.0469736
171	0.989197	1.96224	3.00532	3.70979	3.81494	1.56812	2.3942	0.567266			171	1.04058	1.82025	3.03949	4.31776	4.34965	2.32536	4.27689	1.31704		171	1.13221	2.23702	3.66635	4.56682	4.48397	2.40312	2.86602	0.8386		171	1.56172	1.86604	1.89993	1.66965	1.38428	1.31118	1.13241	0.68943		171	1.91018	2.27686	2.0954	2.33751	1.72165	1.16068	0.453826	-0.0455499
171.2	0.98867	1.96456	3.01391	3.71815	3.8194	1.57333	2.3967	0.568271			171.2	1.04196	1.82431	3.04455	4.32568	4.35441	2.32585	4.28121	1.30834		171.2	1.12707	2.24267	3.66875	4.57613	4.48965	2.40839	2.8726	0.839463		171.2	1.56671	1.86891	1.90038	1.66408	1.379	1.30803	1.13518	0.686996		171.2	1.91018	2.27843	2.09853	2.33806	1.71955	1.16132	0.456947	-0.0456388
171.4	0.991645	1.96407	3.02059	3.71852	3.82753	1.57723	2.39973	0.56884			171.4	1.04378	1.82891	3.05089	4.33419	4.36099	2.33433	4.29097	1.31819		171.4	1.1367	2.24368	3.67479	4.58411	4.49736	2.41265	2.87768	0.840558		171.4	1.56639	1.86687	1.89921	1.66772	1.37438	1.31058	1.13414	0.69276		171.4	1.91113	2.27814	2.09719	2.33695	1.72314	1.16037	0.456394	-0.0453301
171.6	0.992156	1.96309	3.02088	3.72393	3.83805	1.58224	2.40398	0.573057			171.6	1.04466	1.83544	3.05781	4.3428	4.36892	2.33939	4.29301	1.31776		171.6	1.13643	2.24877	3.68307	4.58916	4.50486	2.42111	2.88217	0.842275		171.6	1.56945	1.86204	1.89989	1.66766	1.37804	1.31022	1.13416	0.693425		171.6	1.91035	2.27872	2.09797	2.33579	1.72416	1.16036	0.458065	-0.0454726
171.8	0.992151	1.96559	3.0328	3.73301	3.84374	1.58556	2.40935	0.575111			171.8	1.04565	1.83997	3.06405	4.34925	4.3749	2.34816	4.30347	1.32143		171.8	1.13912	2.24937	3.69028	4.59636	4.51083	2.42767	2.88711	0.844042		171.8	1.56404	1.87026	1.89799	1.66864	1.3771	1.30833	1.12839	0.694423		171.8	1.91016	2.27941	2.09926	2.33607	1.7252	1.15918	0.460474	-0.0474783
172	0.989859	1.97595	3.03838	3.7392	3.85426	1.5892	2.41596	0.5751			172	1.04957	1.84481	3.07036	4.35746	4.38323	2.3539	4.30521	1.33191		172	1.14272	2.25024	3.6971	4.6026	4.51573	2.43118	2.88937	0.845123		172	1.56666	1.866	1.89762	1.66536	1.37773	1.31279	1.13444	0.689114		172	1.91071	2.27873	2.09675	2.33653	1.7239	1.15994	0.462293	-0.048961
172.2	0.994055	1.9876	3.0395	3.74412	3.861	1.59513	2.4215	0.574787			172.2	1.04931	1.85129	3.07755	4.36543	4.39073	2.36101	4.31478	1.32693		172.2	1.1409	2.2493	3.70692	4.6082	4.52342	2.43646	2.89479	0.845094		172.2	1.5651	1.87069	1.8973	1.66542	1.37716	1.3097	1.13044	0.693538		172.2	1.91037	2.27676	2.09786	2.33437	1.72563	1.15986	0.462735	-0.0484997
172.4	0.994677	1.9932	3.05219	3.75221	3.86485	1.60107	2.43021	0.576773			172.4	1.05355	1.85483	3.08265	4.37299	4.3967	2.36574	4.31754	1.33792		172.4	1.14858	2.25432	3.71365	4.61505	4.532	2.44156	2.89933	0.847395		172.4	1.56875	1.86797	1.89816	1.66687	1.38109	1.31379	1.13431	0.686191		172.4	1.90828	2.27528	2.09821	2.33501	1.72285	1.15979	0.463666	-0.0496276
172.6	0.998815	1.99382	3.05616	3.76037	3.87105	1.60454	2.42871	0.57749			172.6	1.05638	1.85709	3.08742	4.38154	4.40247	2.37026	4.32913	1.3267		172.6	1.14348	2.25634	3.71895	4.62449	4.54054	2.4448	2.90882	0.848812		172.6	1.56321	1.87122	1.89645	1.67094	1.37864	1.30756	1.13595	0.690481		172.6	1.91019	2.27577	2.09933	2.33563	1.72335	1.15994	0.464694	-0.0479368
172.8	1.00102	1.99281	3.06132	3.76623	3.87563	1.61081	2.43734	0.579049			172.8	1.06046	1.86019	3.09326	4.38862	4.4094	2.37452	4.33018	1.33513		172.8	1.15313	2.26386	3.72389	4.63065	4.54787	2.44808	2.9156	0.850442		172.8	1.56409	1.86544	1.89978	1.67074	1.37854	1.31198	1.13205	0.689073		172.8	1.90943	2.27625	2.09868	2.33563	1.72275	1.16164	0.461754	-0.0449914
173	1.00369	1.9912	3.07177	3.77296	3.88053	1.61437	2.43416	0.580415			173	1.06129	1.86572	3.09828	4.39585	4.41452	2.38156	4.3414	1.33234		173	1.15278	2.27055	3.73021	4.63831	4.55539	2.45401	2.92406	0.850492		173	1.56355	1.8703	1.89702	1.66532	1.37381	1.31142	1.1317	0.690278		173	1.90843	2.27445	2.10195	2.33534	1.72496	1.16277	0.462148	-0.0447807
173.2	1.00571	1.99698	3.07373	3.78234	3.88681	1.61639	2.44503	0.581292			173.2	1.06522	1.86848	3.10438	4.40136	4.41925	2.38721	4.34235	1.33432		173.2	1.15556	2.27996	3.73741	4.64666	4.56198	2.45912	2.93006	0.853298		173.2	1.56586	1.86591	1.90076	1.66314	1.37767	1.31223	1.13144	0.689721		173.2	1.91022	2.27458	2.09897	2.33789	1.72367	1.16157	0.461265	-0.0469486
173.4	1.00833	2.00855	3.08224	3.78897	3.89097	1.62062	2.44428	0.582455			173.4	1.06647	1.87383	3.11172	4.41061	4.42531	2.3935	4.35214	1.34224		173.4	1.16121	2.28774	3.74491	4.65263	4.56692	2.46316	2.93553	0.855175		173.4	1.55872	1.87282	1.89901	1.66551	1.37611	1.30477	1.127	0.690613		173.4	1.91251	2.27565	2.09936	2.33687	1.72502	1.16236	0.462961	-0.046103
173.6	1.01021	2.02001	3.09	3.79567	3.90011	1.62271	2.45323	0.586411			173.6	1.06861	1.87895	3.11847	4.42049	4.43153	2.4014	4.3506	1.33995		173.6	1.15665	2.29442	3.75179	4.65917	4.57191	2.47291	2.93849	0.856575		173.6	1.56427	1.86843	1.89601	1.66837	1.38195	1.3075	1.13255	0.691566		173.6	1.9121	2.27475	2.09725	2.33693	1.72474	1.16324	0.460778	-0.0455791
173.8	1.01571	2.02863	3.09073	3.7972	3.90843	1.6257	2.4522	0.587008			173.8	1.06995	1.88233	3.1242	4.42815	4.43553	2.40815	4.36315	1.35249		173.8	1.16869	2.29827	3.76057	4.66517	4.5762	2.47956	2.94201	0.858083		173.8	1.5642	1.86879	1.8966	1.67007	1.37814	1.31636	1.12734	0.688979		173.8	1.91376	2.27319	2.09918	2.33636	1.72374	1.16256	0.462215	-0.0460803
174	1.02058	2.03058	3.10349	3.80771	3.91257	1.63124	2.46401	0.587724			174	1.07279	1.88537	3.13142	4.43396	4.44091	2.41323	4.36342	1.34292		174	1.16081	2.3055	3.76855	4.67091	4.58248	2.48595	2.94633	0.860812		174	1.56647	1.86423	1.894	1.66843	1.37538	1.3081	1.12987	0.686653		174	1.91411	2.27575	2.09733	2.3364	1.72419	1.16031	0.462106	-0.0445733
174.2	1.02217	2.02666	3.1077	3.81315	3.92371	1.63468	2.46259	0.589611			174.2	1.07578	1.89106	3.13835	4.44393	4.44984	2.41734	4.37383	1.35412		174.2	1.17144	2.30854	3.77577	4.67508	4.59063	2.49348	2.95141	0.862866		174.2	1.56459	1.86852	1.90183	1.66931	1.37837	1.31049	1.12859	0.689393		174.2	1.91422	2.277	2.09989	2.33559	1.72347	1.16061	0.460309	-0.041944
174.4	1.02297	2.02439	3.1104	3.82087	3.92955	1.63791	2.46636	0.590198			174.4	1.07661	1.89398	3.14296	4.45084	4.45636	2.42035	4.37764	1.348		174.4	1.16992	2.3085	3.78382	4.68236	4.59677	2.50006	2.95637	0.865004		174.4	1.56754	1.86393	1.89916	1.66476	1.3798	1.3078	1.13215	0.687712		174.4	1.91424	2.2763	2.10064	2.33636	1.72479	1.16076	0.460468	-0.0428054
174.6	1.02342	2.03001	3.12235	3.82617	3.93206	1.64459	2.47109	0.589118			174.6	1.07945	1.89704	3.14809	4.4583	4.46311	2.42217	4.38831	1.3542		174.6	1.17492	2.31192	3.7917	4.6882	4.60276	2.50392	2.96236	0.866449		174.6	1.56713	1.86419	1.89788	1.66746	1.3801	1.30888	1.12979	0.68614		174.6	1.91209	2.27624	2.10314	2.33675	1.72386	1.16053	0.462503	-0.0461921
174.8	1.02288	2.04042	3.12401	3.83659	3.94199	1.64741	2.47767	0.590873			174.8	1.07997	1.90216	3.15366	4.4668	4.47019	2.42664	4.39191	1.3599		174.8	1.18165	2.31622	3.79882	4.69557	4.61044	2.50848	2.97138	0.867558		174.8	1.56794	1.86898	1.89365	1.66645	1.37948	1.31114	1.1356	0.689734		174.8	1.91203	2.27591	2.10172	2.33668	1.72434	1.1611	0.462961	-0.0478257
175	1.02339	2.05261	3.12956	3.84363	3.94737	1.65137	2.48052	0.594686			175	1.08398	1.90636	3.15992	4.47349	4.47691	2.42736	4.40085	1.35645		175	1.17827	2.32099	3.80367	4.7012	4.61642	2.51249	2.97765	0.86933		175	1.56396	1.87254	1.89692	1.66423	1.37792	1.30876	1.1311	0.689326		175	1.91159	2.27663	2.10323	2.33636	1.72424	1.16158	0.462665	-0.0482171
175.2	1.02684	2.06052	3.13524	3.85084	3.95308	1.65639	2.48231	0.595301			175.2	1.08331	1.90969	3.16402	4.48099	4.48252	2.43559	4.4072	1.36717		175.2	1.18772	2.3268	3.80907	4.70753	4.61968	2.51764	2.98435	0.869837		175.2	1.57095	1.86734	1.89674	1.66445	1.37811	1.3068	1.13421	0.691347		175.2	1.91077	2.27561	2.10255	2.33597	1.7264	1.16236	0.464216	-0.0486756
175.4	1.03038	2.06218	3.1377	3.85677	3.96281	1.66114	2.48645	0.596094			175.4	1.08801	1.91383	3.17175	4.48929	4.49138	2.43879	4.41298	1.36115		175.4	1.18195	2.33486	3.81398	4.71418	4.62255	2.52296	2.98948	0.871162		175.4	1.57055	1.87001	1.90126	1.66689	1.37353	1.31282	1.13432	0.687428		175.4	1.91252	2.27621	2.10163	2.33604	1.72388	1.16293	0.463065	-0.0491489
175.6	1.03504	2.05993	3.14923	3.8649	3.96873	1.66513	2.49074	0.59763			175.6	1.08911	1.91862	3.17782	4.49766	4.4976	2.44699	4.41933	1.37047		175.6	1.19085	2.34177	3.82119	4.72081	4.62686	2.53079	2.99598	0.873512		175.6	1.56556	1.87265	1.90029	1.66366	1.38081	1.30942	1.13451	0.688364		175.6	1.91178	2.27649	2.09934	2.33619	1.72284	1.16342	0.462237	-0.0477737
175.8	1.03728	2.05715	3.15754	3.8716	3.97736	1.67124	2.49409	0.598111			175.8	1.09543	1.92534	3.18468	4.5072	4.50384	2.45068	4.4236	1.36752		175.8	1.18815	2.34656	3.82659	4.73088	4.63374	2.53934	2.99684	0.876915		175.8	1.56674	1.87111	1.90376	1.66714	1.37818	1.30828	1.1315	0.688345		175.8	1.91384	2.2783	2.10105	2.33649	1.72374	1.1637	0.461558	-0.0479848
176	1.04127	2.05843	3.15998	3.87649	3.98429	1.67416	2.50009	0.597746			176	1.09535	1.93052	3.192	4.51302	4.51161	2.45899	4.43119	1.37176		176	1.19478	2.35049	3.83418	4.73712	4.63725	2.54589	3.00012	0.879945		176	1.5677	1.87124	1.89662	1.66199	1.37572	1.30824	1.13039	0.689622		176	1.91541	2.27768	2.1006	2.33677	1.7253	1.16368	0.460818	-0.0479567
176.2	1.0438	2.0697	3.17236	3.8818	3.98803	1.67824	2.50697	0.600886			176.2	1.0997	1.9341	3.19899	4.51955	4.51867	2.45501	4.43392	1.37629		176.2	1.20083	2.35624	3.84042	4.74531	4.64044	2.55279	3.00468	0.881846		176.2	1.57071	1.87112	1.89653	1.66755	1.37879	1.30776	1.1268	0.691003		176.2	1.91554	2.27835	2.10327	2.33596	1.72305	1.16365	0.461544	-0.0486641
176.4	1.0442	2.08199	3.17567	3.88684	3.99562	1.68169	2.51059	0.603991			176.4	1.10027	1.94043	3.20497	4.52622	4.52278	2.45964	4.44159	1.37404		176.4	1.19695	2.35845	3.84676	4.75096	4.65085	2.56025	3.01168	0.883308		176.4	1.56587	1.87084	1.90143	1.66481	1.37832	1.30893	1.12782	0.689775		176.4	1.91503	2.28037	2.10273	2.33703	1.72545	1.16185	0.461448	-0.0483302
176.6	1.0456	2.08935	3.18356	3.89574	4.00227	1.68468	2.51647	0.606081			176.6	1.10351	1.94528	3.21277	4.53366	4.52973	2.46781	4.44521	1.38641		176.6	1.20841	2.36239	3.85171	4.75798	4.6597	2.56271	3.01653	0.885019		176.6	1.56393	1.86837	1.89969	1.66374	1.37389	1.31058	1.13019	0.69179		176.6	1.91819	2.28139	2.10153	2.33635	1.72773	1.1607	0.458753	-0.0484947
176.8	1.04815	2.09324	3.19146	3.9011	4.00543	1.69092	2.51965	0.605594			176.8	1.10203	1.94706	3.21947	4.5429	4.53688	2.47274	4.45689	1.37881		176.8	1.20033	2.37018	3.85618	4.76651	4.66417	2.56461	3.02512	0.887108		176.8	1.56553	1.87322	1.89965	1.6653	1.38101	1.30806	1.13072	0.692541		176.8	1.91534	2.28341	2.10055	2.33842	1.72692	1.15884	0.459407	-0.0473681
177	1.05184	2.09185	3.19336	3.90412	4.0151	1.69573	2.52156	0.608258			177	1.1045	1.94975	3.22609	4.54933	4.54141	2.47147	4.45698	1.39212		177	1.21114	2.37686	3.86244	4.7752	4.67103	2.56994	3.0329	0.888492		177	1.56811	1.86849	1.8953	1.66224	1.37895	1.30594	1.13157	0.687403		177	1.91598	2.28359	2.10095	2.33939	1.72576	1.16068	0.460581	-0.0494439
177.2	1.05525	2.08708	3.20372	3.9123	4.01912	1.69854	2.52523	0.608789			177.2	1.10688	1.95456	3.2316	4.55622	4.54655	2.48033	4.468	1.38715		177.2	1.20604	2.38317	3.87126	4.77764	4.68113	2.57545	3.03897	0.891406		177.2	1.56988	1.86906	1.89903	1.6656	1.37795	1.30746	1.1329	0.687604		177.2	1.91922	2.28337	2.0979	2.34084	1.72398	1.16102	0.458005	-0.0488519
177.4	1.05453	2.08941	3.20968	3.91968	4.02438	1.70352	2.53335	0.609783			177.4	1.10743	1.95769	3.23671	4.56465	4.55281	2.4903	4.46886	1.39006		177.4	1.2144	2.39203	3.87578	4.78283	4.68367	2.58143	3.04462	0.893447		177.4	1.56664	1.87051	1.89953	1.66928	1.37661	1.30442	1.12813	0.687949		177.4	1.91867	2.2836	2.09901	2.34081	1.725	1.16305	0.458806	-0.0485601
177.6	1.05864	2.09747	3.20964	3.92286	4.03338	1.70847	2.53702	0.610824			177.6	1.10872	1.96217	3.24217	4.57111	4.55854	2.49642	4.47755	1.39216		177.6	1.21778	2.39815	3.88407	4.78848	4.68863	2.58924	3.04824	0.896235		177.6	1.56757	1.87258	1.90525	1.66397	1.37841	1.30892	1.12547	0.691357		177.6	1.91762	2.28384	2.09898	2.34333	1.72517	1.16317	0.461078	-0.0473582
177.8	1.06048	2.1097	3.21891	3.92919	4.03773	1.71125	2.54224	0.613023			177.8	1.11168	1.96708	3.24724	4.5786	4.56269	2.50397	4.47651	1.3896		177.8	1.21712	2.40191	3.89352	4.79624	4.6936	2.59702	3.05213	0.896762		177.8	1.5653	1.87098	1.89513	1.66301	1.37799	1.30743	1.13271	0.689886		177.8	1.91956	2.28153	2.10027	2.34431	1.72575	1.16343	0.4622	-0.0495446
178	1.06114	2.12183	3.22566	3.93333	4.04557	1.71605	2.54741	0.613291			178	1.11366	1.97171	3.25191	4.58479	4.57025	2.51134	4.48959	1.40055		178	1.22592	2.40548	3.90082	4.80242	4.69761	2.6036	3.05606	0.897385		178	1.56523	1.86955	1.89661	1.66755	1.37802	1.30547	1.13002	0.686359		178	1.91957	2.28188	2.09936	2.34407	1.72301	1.16379	0.461212	-0.047874
178.2	1.0619	2.1289	3.23092	3.93874	4.05407	1.71854	2.55298	0.612854			178.2	1.11306	1.97692	3.26001	4.59075	4.57509	2.51974	4.48744	1.39454		178.2	1.21819	2.40874	3.90693	4.80932	4.69926	2.60811	3.05906	0.897639		178.2	1.56434	1.86944	1.89852	1.66757	1.37914	1.30781	1.12857	0.686144		178.2	1.91809	2.28296	2.10075	2.34457	1.72469	1.16216	0.460925	-0.0488622
178.4	1.06752	2.1278	3.23914	3.94451	4.05754	1.72287	2.5563	0.613078			178.4	1.11734	1.98162	3.26686	4.59822	4.58107	2.52025	4.49945	1.40647		178.4	1.23036	2.41134	3.91603	4.81448	4.70512	2.61106	3.06324	0.897643		178.4	1.56661	1.87136	1.89776	1.66523	1.37674	1.30379	1.13325	0.688594		178.4	1.91771	2.28055	2.09977	2.34392	1.72331	1.16177	0.459564	-0.0490652
178.6	1.06533	2.12462	3.24541	3.95065	4.06439	1.72761	2.56104	0.613089			178.6	1.11994	1.9852	3.27366	4.60582	4.58661	2.51972	4.50046	1.40074		178.6	1.22494	2.41537	3.92248	4.82098	4.71043	2.61453	3.06751	0.897751		178.6	1.57032	1.8703	1.89465	1.66385	1.37312	1.3063	1.12623	0.689186		178.6	1.91933	2.28098	2.10197	2.34335	1.72327	1.162	0.459837	-0.0505848
178.8	1.06427	2.12168	3.25463	3.95523	4.07341	1.73116	2.56247	0.615334			178.8	1.1237	1.98854	3.2804	4.61404	4.59524	2.52253	4.5135	1.40639		178.8	1.23278	2.41841	3.92533	4.8282	4.71578	2.62293	3.07314	0.898474		178.8	1.56679	1.86784	1.90014	1.66394	1.37618	1.30848	1.12645	0.68408		178.8	1.91725	2.28338	2.09941	2.34237	1.72314	1.16195	0.459823	-0.0492143
179	1.06529	2.12415	3.25784	3.9657	4.07584	1.73513	2.56397	0.617525			179	1.12509	1.99348	3.28646	4.62159	4.59928	2.52768	4.51199	1.41014		179	1.23405	2.42402	3.93245	4.83248	4.72133	2.62972	3.07981	0.899826		179	1.56844	1.87353	1.90264	1.67054	1.37934	1.30869	1.12695	0.688206		179	1.91586	2.28311	2.10113	2.34213	1.72442	1.16078	0.459064	-0.0493029
179.2	1.06585	2.13344	3.26314	3.97313	4.08519	1.74176	2.56482	0.618797			179.2	1.12866	1.99715	3.29159	4.62771	4.60796	2.53159	4.52517	1.40703		179.2	1.23589	2.43182	3.93739	4.84011	4.72893	2.64054	3.08847	0.901405		179.2	1.56419	1.86927	1.89412	1.66444	1.37377	1.30709	1.1281	0.691397		179.2	1.91533	2.28366	2.10041	2.34191	1.72631	1.16028	0.461167	-0.0477608
179.4	1.06823	2.14585	3.2728	3.97773	4.09238	1.74477	2.56898	0.618187			179.4	1.12929	2.0021	3.29735	4.63375	4.61517	2.53896	4.52677	1.42095		179.4	1.24232	2.43812	3.9449	4.84554	4.73572	2.64839	3.09434	0.903442		179.4	1.56839	1.86841	1.90542	1.66875	1.37768	1.30806	1.12755	0.691764		179.4	1.9162	2.28504	2.10184	2.34123	1.72564	1.15995	0.459504	-0.048737
179.6	1.0727	2.1582	3.2749	3.98386	4.09762	1.74758	2.57081	0.619054			179.6	1.13212	2.00611	3.30318	4.64049	4.62024	2.54444	4.535	1.4128		179.6	1.23703	2.43983	3.95109	4.85005	4.74119	2.65581	3.10179	0.90475		179.6	1.56788	1.86899	1.89849	1.66854	1.37566	1.30452	1.12637	0.692374		179.6	1.91485	2.28501	2.10304	2.3403	1.72722	1.15937	0.458833	-0.047974
179.8	1.07763	2.16477	3.28293	3.98818	4.10711	1.7519	2.57473	0.61842			179.8	1.13242	2.0112	3.3096	4.64883	4.62443	2.54889	4.53678	1.42781		179.8	1.24952	2.44411	3.96228	4.85654	4.74603	2.65897	3.10806	0.906585		179.8	1.56544	1.86649	1.89656	1.66855	1.37532	1.30388	1.12719	0.685689		179.8	1.9174	2.28307	2.10515	2.33888	1.72513	1.16161	0.455516	-0.0485987
180	1.07955	2.16364	3.28956	3.99557	4.11205	1.75551	2.58053	0.617978			180	1.13645	2.01603	3.31665	4.65644	4.63064	2.55551	4.54846	1.41651		180	1.23921	2.44766	3.96878	4.86512	4.75418	2.6644	3.11104	0.90763		180	1.56213	1.86966	1.89762	1.66509	1.37786	1.30658	1.13021	0.690128		180	1.9168	2.28314	2.10233	2.33974	1.72402	1.16219	0.454167	-0.0476676
180.2	1.08205	2.16011	3.2912	3.99892	4.11666	1.75955	2.58697	0.619271			180.2	1.13885	2.0199	3.32262	4.6627	4.63501	2.56147	4.54703	1.42766		180.2	1.25262	2.45012	3.97678	4.86901	4.76082	2.66726	3.11259	0.908361		180.2	1.566	1.87119	1.90238	1.66632	1.378	1.3022	1.12918	0.687597		180.2	1.91717	2.282	2.10315	2.33922	1.72484	1.16303	0.456503	-0.0491033
180.4	1.08166	2.15776	3.3003	4.00562	4.12385	1.76268	2.59192	0.622088			180.4	1.14229	2.02274	3.32906	4.67072	4.63792	2.56493	4.5546	1.42309		180.4	1.24823	2.45275	3.98238	4.8761	4.76747	2.67457	3.11707	0.908894		180.4	1.56583	1.87035	1.89732	1.66145	1.37614	1.30274	1.1279	0.688399		180.4	1.91694	2.28247	2.10228	2.34031	1.72436	1.16299	0.458489	-0.0469301
180.6	1.08301	2.15927	3.30629	4.01011	4.12712	1.7674	2.59483	0.624143			180.6	1.14373	2.02612	3.33453	4.6782	4.64411	2.56993	4.5605	1.42398		180.6	1.25594	2.46043	3.98671	4.88452	4.77151	2.67893	3.1226	0.909728		180.6	1.56761	1.87214	1.90001	1.66206	1.3779	1.30801	1.13033	0.689589		180.6	1.91923	2.28094	2.10228	2.33981	1.72215	1.16384	0.45763	-0.0465426
180.8	1.08862	2.17009	3.31159	4.02065	4.1338	1.77314	2.5995	0.625511			180.8	1.14802	2.02981	3.34103	4.68521	4.64998	2.57604	4.57084	1.4324		180.8	1.26093	2.4655	3.9899	4.89093	4.77752	2.68444	3.12531	0.911409		180.8	1.56603	1.86911	1.89798	1.66503	1.37946	1.30523	1.12891	0.686163		180.8	1.91791	2.28123	2.10063	2.34188	1.72415	1.16304	0.459245	-0.0468231
181	1.09143	2.18344	3.32096	4.02613	4.14057	1.77674	2.60322	0.627474			181	1.14735	2.03351	3.34591	4.69233	4.65564	2.57779	4.57089	1.42767		181	1.26082	2.4686	3.99389	4.89555	4.78166	2.69032	3.13376	0.912412		181	1.56784	1.87491	1.89686	1.66457	1.37348	1.30425	1.12213	0.685195		181	1.92017	2.2807	2.10421	2.34035	1.72607	1.16252	0.462664	-0.0490125
181.2	1.09439	2.19479	3.32559	4.03408	4.1454	1.77909	2.60753	0.629418			181.2	1.15164	2.03842	3.35153	4.69998	4.66119	2.58667	4.58094	1.44246		181.2	1.27023	2.47287	4.00133	4.90293	4.78755	2.69281	3.14249	0.913188		181.2	1.56824	1.87093	1.90024	1.66492	1.37693	1.30874	1.13064	0.688794		181.2	1.92022	2.28197	2.1036	2.34044	1.72477	1.16318	0.461298	-0.0500484
181.4	1.09766	2.20176	3.33296	4.04169	4.15472	1.78537	2.61001	0.630705			181.4	1.1519	2.04275	3.35803	4.70643	4.66703	2.59524	4.58499	1.43553		181.4	1.26443	2.47767	4.00474	4.90769	4.79221	2.69607	3.15024	0.91385		181.4	1.56792	1.87373	1.90174	1.66182	1.37514	1.30446	1.12869	0.691771		181.4	1.91988	2.28215	2.10503	2.34017	1.72642	1.16376	0.460201	-0.0500598
181.6	1.09891	2.20374	3.34065	4.05127	4.16205	1.78862	2.61635	0.63151			181.6	1.15553	2.04949	3.36416	4.71332	4.67269	2.59467	4.59048	1.44918		181.6	1.27349	2.47993	4.01137	4.91248	4.79812	2.70337	3.15983	0.912867		181.6	1.56792	1.87592	1.89743	1.66604	1.37734	1.30479	1.12965	0.688644		181.6	1.91928	2.28324	2.10572	2.33958	1.72619	1.16341	0.463629	-0.0494741
181.8	1.09681	2.19758	3.3441	4.05619	4.16666	1.79314	2.62095	0.634213			181.8	1.1551	2.05469	3.36922	4.72035	4.67878	2.59905	4.59104	1.44505		181.8	1.26829	2.48697	4.0206	4.91844	4.80173	2.7103	3.16768	0.914256		181.8	1.56587	1.87503	1.90311	1.65935	1.37578	1.3081	1.12926	0.689307		181.8	1.9217	2.2842	2.10699	2.33749	1.72535	1.16263	0.462116	-0.0490609
182	1.09677	2.19405	3.35262	4.06207	4.17671	1.79735	2.62533	0.634228			182	1.16075	2.06013	3.37601	4.72737	4.68586	2.60627	4.59992	1.4478		182	1.27523	2.49646	4.02924	4.92512	4.80716	2.71422	3.16935	0.915101		182	1.56962	1.87568	1.90152	1.66254	1.3762	1.30342	1.1283	0.69177		182	1.92009	2.28475	2.10462	2.33786	1.72603	1.16367	0.461343	-0.0477018
182.2	1.09754	2.19331	3.35725	4.06432	4.18067	1.80271	2.631	0.635834			182.2	1.16057	2.06547	3.38218	4.73653	4.69022	2.60685	4.60472	1.45111		182.2	1.27539	2.50031	4.03541	4.92864	4.8105	2.71906	3.17224	0.916676		182.2	1.56858	1.87304	1.8988	1.66393	1.37686	1.30549	1.12143	0.691938		182.2	1.91941	2.28494	2.10618	2.33988	1.7259	1.1643	0.460066	-0.0469782
182.4	1.10214	2.19964	3.36484	4.07133	4.18572	1.80793	2.63514	0.637598			182.4	1.16481	2.06965	3.38707	4.74185	4.69762	2.61148	4.6122	1.44688		182.4	1.27706	2.50604	4.04508	4.93179	4.8129	2.72695	3.17429	0.918568		182.4	1.56456	1.86781	1.89995	1.66351	1.36861	1.30362	1.12601	0.684652		182.4	1.92201	2.28528	2.10522	2.33969	1.72593	1.16409	0.459382	-0.0485532
182.6	1.1039	2.20975	3.37036	4.07479	4.19399	1.81142	2.64035	0.638858			182.6	1.16621	2.07282	3.39317	4.74704	4.70212	2.62261	4.6155	1.4593		182.6	1.2838	2.51256	4.05346	4.93434	4.81813	2.72995	3.17251	0.920449		182.6	1.56664	1.87235	1.90183	1.66814	1.37466	1.3052	1.12619	0.683643		182.6	1.92337	2.28645	2.10684	2.34106	1.72876	1.16512	0.458267	-0.0497025
182.8	1.1071	2.22601	3.37421	4.07869	4.19859	1.81499	2.64341	0.639715			182.8	1.1711	2.077	3.39947	4.75158	4.70872	2.62867	4.62561	1.45075		182.8	1.27818	2.51362	4.06085	4.94229	4.82641	2.73481	3.17522	0.921713		182.8	1.57094	1.86993	1.90054	1.66514	1.37817	1.30478	1.12988	0.688988		182.8	1.92253	2.28528	2.10706	2.34193	1.72889	1.16751	0.45763	-0.0492452
183	1.11233	2.23721	3.38254	4.0845	4.20204	1.81867	2.64825	0.642006			183	1.17115	2.08005	3.40607	4.75992	4.71354	2.63437	4.62915	1.4641		183	1.29174	2.51514	4.06785	4.94933	4.82997	2.73999	3.18105	0.923011		183	1.56734	1.87084	1.903	1.66412	1.37364	1.30044	1.12971	0.690866		183	1.92367	2.28525	2.10883	2.34328	1.72915	1.167	0.458335	-0.0488242
183.2	1.11487	2.24397	3.38747	4.09095	4.21126	1.82245	2.6505	0.642421			183.2	1.17482	2.08385	3.41195	4.76693	4.71991	2.63998	4.63577	1.4587		183.2	1.28211	2.52061	4.07448	4.95741	4.83611	2.75083	3.18681	0.924017		183.2	1.5687	1.87278	1.89693	1.66517	1.3805	1.30472	1.12348	0.685735		183.2	1.9231	2.28505	2.10703	2.34255	1.73133	1.1659	0.458353	-0.047338
183.4	1.1177	2.24476	3.39081	4.09783	4.21299	1.82355	2.65382	0.644313			183.4	1.17562	2.08875	3.4183	4.77347	4.72577	2.64237	4.63824	1.46566		183.4	1.29469	2.52432	4.08301	4.96202	4.8402	2.75337	3.19374	0.924834		183.4	1.57264	1.87243	1.90121	1.66736	1.37906	1.30714	1.12714	0.687551		183.4	1.92182	2.28434	2.10787	2.34306	1.73035	1.16638	0.460866	-0.0470539
183.6	1.11924	2.24152	3.40393	4.10144	4.21995	1.82813	2.65726	0.646301			183.6	1.17963	2.09275	3.42357	4.77862	4.73115	2.64992	4.6454	1.46512		183.6	1.28917	2.53225	4.08776	4.96585	4.84814	2.76214	3.20341	0.926495		183.6	1.56785	1.8717	1.8982	1.66061	1.37626	1.30248	1.13104	0.687407		183.6	1.91997	2.28459	2.10496	2.34255	1.7272	1.16572	0.460517	-0.045104
183.8	1.12316	2.2362	3.40384	4.11194	4.22653	1.83265	2.66023	0.646836			183.8	1.18086	2.09625	3.42851	4.78441	4.73764	2.65357	4.64907	1.46566		183.8	1.29775	2.53944	4.0932	4.97444	4.85396	2.76652	3.21167	0.926625		183.8	1.56813	1.86916	1.90065	1.66644	1.37869	1.30518	1.1274	0.686183		183.8	1.91982	2.28578	2.10531	2.34295	1.72776	1.16395	0.462284	-0.0446123
184	1.12344	2.23394	3.41352	4.11616	4.23045	1.83746	2.66371	0.647099			184	1.18355	2.10154	3.43316	4.79317	4.74346	2.6618	4.65648	1.47529		184	1.30227	2.54531	4.09833	4.98243	4.86017	2.77107	3.2171	0.927261		184	1.56707	1.87165	1.90234	1.66598	1.37329	1.30715	1.1264	0.685885		184	1.92076	2.28761	2.10336	2.34183	1.72719	1.16325	0.460225	-0.0471972
184.2	1.12396	2.23999	3.42128	4.12421	4.23844	1.84068	2.66806	0.646915			184.2	1.18489	2.10504	3.43827	4.79979	4.74969	2.66957	4.6592	1.46785		184.2	1.30175	2.54789	4.10337	4.9902	4.86404	2.77321	3.222	0.929636		184.2	1.57008	1.87428	1.90251	1.66432	1.37707	1.30495	1.12945	0.690519		184.2	1.92246	2.28817	2.10455	2.34092	1.72656	1.16373	0.459301	-0.0478936
184.4	1.12535	2.25018	3.42195	4.12862	4.24499	1.84373	2.67292	0.646612			184.4	1.18838	2.1097	3.44352	4.80683	4.75553	2.67893	4.6657	1.47788		184.4	1.31032	2.55329	4.10779	4.99683	4.87133	2.78139	3.22606	0.931436		184.4	1.56991	1.87226	1.89973	1.66462	1.37562	1.30374	1.12901	0.68923		184.4	1.92319	2.2886	2.10391	2.34031	1.72721	1.16302	0.458469	-0.0478168
184.6	1.12448	2.26334	3.43333	4.13796	4.24668	1.84871	2.67813	0.646383			184.6	1.18922	2.11482	3.45113	4.81269	4.7621	2.68447	4.67083	1.47425		184.6	1.30488	2.55317	4.11471	5.00406	4.87316	2.78942	3.23	0.934755		184.6	1.57258	1.87184	1.90569	1.66641	1.37206	1.30639	1.12712	0.6909		184.6	1.92306	2.28817	2.10524	2.34172	1.72731	1.16309	0.457622	-0.0489384
184.8	1.12372	2.27749	3.43828	4.13839	4.25781	1.85184	2.68814	0.646969			184.8	1.19121	2.11995	3.45818	4.82231	4.76634	2.68761	4.67739	1.47843		184.8	1.31516	2.55693	4.12106	5.00406	4.8794	2.79687	3.23147	0.937827		184.8	1.56992	1.86833	1.90078	1.66376	1.37194	1.30521	1.12683	0.68736		184.8	1.92286	2.28901	2.10681	2.34159	1.72899	1.16233	0.458429	-0.0501573
185	1.12853	2.28721	3.44122	4.14549	4.26309	1.85397	2.69462	0.647168			185	1.19444	2.12314	3.4653	4.82974	4.77144	2.68877	4.68054	1.48159		185	1.30563	2.55981	4.12679	5.01116	4.88371	2.80257	3.23479	0.941217		185	1.5717	1.87657	1.89915	1.66421	1.37218	1.30452	1.12905	0.686746		185	1.92254	2.28793	2.10845	2.34131	1.73139	1.1638	0.458862	-0.0485539
185.2	1.13289	2.28941	3.44859	4.14788	4.26541	1.85975	2.69798	0.651181			185.2	1.19615	2.1279	3.47241	4.83592	4.7756	2.69396	4.68634	1.48149		185.2	1.31752	2.57043	4.137	5.01843	4.8898	2.81092	3.2395	0.942135		185.2	1.57082	1.87025	1.90078	1.666	1.37291	1.30378	1.12875	0.691275		185.2	1.92233	2.28795	2.10727	2.34277	1.72829	1.16316	0.459374	-0.048988
185.4	1.13364	2.28799	3.45219	4.15206	4.2759	1.86659	2.70794	0.650772			185.4	1.19915	2.1313	3.47854	4.84017	4.78066	2.69629	4.69232	1.49153		185.4	1.31461	2.57613	4.14425	5.02876	4.89499	2.81591	3.24669	0.945417		185.4	1.57105	1.87429	1.89557	1.66223	1.37865	1.30647	1.12878	0.68405		185.4	1.92166	2.28874	2.10789	2.34186	1.72792	1.16336	0.460287	-0.048298
185.6	1.14094	2.2833	3.45712	4.15642	4.28313	1.87052	2.71125	0.652381			185.6	1.20079	2.13484	3.48525	4.84606	4.78517	2.70127	4.6987	1.48494		185.6	1.31996	2.58611	4.15138	5.03443	4.90286	2.81977	3.25329	0.946214		185.6	1.56871	1.87622	1.9067	1.66908	1.38175	1.30251	1.12553	0.687812		185.6	1.92151	2.2889	2.10751	2.34091	1.73008	1.1626	0.46203	-0.0503715
185.8	1.14341	2.28021	3.46562	4.16593	4.28491	1.87669	2.71589	0.654597			185.8	1.20375	2.13557	3.49257	4.85671	4.79298	2.70807	4.70226	1.49491		185.8	1.32671	2.5864	4.15604	5.03557	4.90633	2.82421	3.26394	0.948527		185.8	1.57292	1.87317	1.90463	1.66027	1.37615	1.30271	1.12787	0.680421		185.8	1.92406	2.28751	2.10683	2.34	1.72888	1.16297	0.460037	-0.0497398
186	1.13999	2.28175	3.47209	4.17186	4.29627	1.88267	2.71851	0.656793			186	1.20395	2.14036	3.49874	4.86136	4.79698	2.71544	4.70913	1.49302		186	1.32427	2.59486	4.16438	5.0374	4.91026	2.83178	3.27282	0.9507		186	1.5693	1.87485	1.89989	1.65997	1.37501	1.3062	1.12478	0.686571		186	1.92482	2.2877	2.10628	2.34131	1.72634	1.16193	0.460553	-0.0497645
186.2	1.14266	2.28892	3.48019	4.1775	4.29945	1.8882	2.7205	0.656504			186.2	1.20809	2.14566	3.50516	4.86757	4.80191	2.71718	4.71482	1.49659		186.2	1.33622	2.59032	4.16773	5.04306	4.91528	2.83595	3.28014	0.953568		186.2	1.56925	1.87191	1.9021	1.66507	1.37309	1.30554	1.12407	0.684883		186.2	1.92446	2.28631	2.10956	2.34051	1.7277	1.16349	0.461069	-0.0495046
186.4	1.14485	2.29976	3.48681	4.18355	4.30111	1.89084	2.71844	0.659491			186.4	1.20713	2.1515	3.51152	4.87199	4.80778	2.7223	4.71854	1.5011		186.4	1.32731	2.59333	4.17151	5.04925	4.92066	2.84001	3.28413	0.954608		186.4	1.56986	1.87332	1.89811	1.66332	1.3767	1.30519	1.12427	0.686283		186.4	1.92507	2.28697	2.11003	2.3414	1.72746	1.16342	0.458949	-0.0491069
186.6	1.1448	2.31298	3.49251	4.18696	4.30978	1.89294	2.72098	0.66045			186.6	1.21194	2.15724	3.51703	4.88031	4.81425	2.72442	4.723	1.5008		186.6	1.34386	2.59398	4.17359	5.05575	4.92247	2.84512	3.28906	0.955615		186.6	1.57264	1.87333	1.89993	1.66316	1.37274	1.30495	1.12844	0.684629		186.6	1.92547	2.28634	2.10759	2.34223	1.72737	1.16496	0.458361	-0.0477898
186.8	1.14654	2.32434	3.49649	4.19127	4.31711	1.89742	2.72485	0.661498			186.8	1.21159	2.16481	3.52217	4.88635	4.81834	2.72848	4.72977	1.51218		186.8	1.33307	2.60384	4.18073	5.06175	4.92602	2.85262	3.28915	0.956975		186.8	1.57349	1.8748	1.89468	1.66727	1.37602	1.30763	1.12355	0.685043		186.8	1.92534	2.28662	2.1085	2.34322	1.72833	1.16488	0.460336	-0.0468005
187	1.15036	2.33104	3.49921	4.19302	4.31782	1.89984	2.73049	0.662009			187	1.21664	2.16907	3.52891	4.89242	4.82431	2.73418	4.73333	1.50425		187	1.34467	2.6065	4.18769	5.06411	4.9331	2.85866	3.28995	0.958512		187	1.57257	1.87673	1.89785	1.66551	1.37214	1.30648	1.12349	0.686916		187	1.92376	2.28654	2.10744	2.34286	1.72955	1.1651	0.461401	-0.0479732
187.2	1.15124	2.33076	3.50521	4.20451	4.32949	1.90183	2.73758	0.662241			187.2	1.21753	2.17241	3.53536	4.89668	4.82922	2.73864	4.73741	1.51312		187.2	1.33918	2.61569	4.19539	5.06499	4.93779	2.86417	3.29226	0.960092		187.2	1.57318	1.87482	1.9002	1.66381	1.37609	1.30154	1.12834	0.689701		187.2	1.92509	2.28693	2.10921	2.34396	1.73023	1.16502	0.460197	-0.0473887
187.4	1.1525	2.32695	3.5088	4.20984	4.33348	1.9064	2.74566	0.663747			187.4	1.2225	2.17613	3.54035	4.90461	4.83436	2.743	4.74376	1.50968		187.4	1.34768	2.622	4.20215	5.07098	4.94547	2.87126	3.29754	0.960963		187.4	1.5672	1.87388	1.89734	1.66231	1.37454	1.30562	1.12269	0.690792		187.4	1.92576	2.28627	2.10972	2.34529	1.73057	1.16599	0.461195	-0.0495194
187.6	1.15585	2.32227	3.51604	4.21782	4.33642	1.91164	2.75223	0.664755			187.6	1.22191	2.17878	3.54601	4.91359	4.83815	2.74884	4.74796	1.51349		187.6	1.34658	2.62662	4.20927	5.07885	4.95153	2.87525	3.3018	0.962345		187.6	1.56966	1.87294	1.90084	1.66281	1.3731	1.30158	1.12356	0.684134		187.6	1.92513	2.2871	2.11188	2.34486	1.73091	1.16518	0.461216	-0.0490623
187.8	1.15932	2.31996	3.52219	4.22429	4.34488	1.91559	2.75284	0.664604			187.8	1.22806	2.18287	3.55093	4.9217	4.84125	2.75479	4.7539	1.51716		187.8	1.3453	2.6304	4.21371	5.08719	4.95619	2.88032	3.31034	0.962815		187.8	1.5712	1.87328	1.89667	1.66296	1.37453	1.30411	1.12891	0.686161		187.8	1.92359	2.2864	2.11171	2.34449	1.72879	1.16509	0.458947	-0.0488755
188	1.16129	2.32066	3.52828	4.23272	4.35083	1.92125	2.75275	0.665369			188	1.22639	2.18597	3.5566	4.92814	4.84778	2.75929	4.75931	1.51612		188	1.35823	2.63531	4.22121	5.0921	4.96274	2.88691	3.31793	0.963419		188	1.57263	1.87816	1.9	1.66049	1.37399	1.30775	1.12898	0.687509		188	1.92583	2.28655	2.11379	2.34358	1.72719	1.16355	0.458665	-0.0478695
188.2	1.16476	2.32872	3.53426	4.23455	4.35489	1.92519	2.75694	0.667377			188.2	1.23015	2.19019	3.56183	4.9332	4.85416	2.76447	4.76463	1.52681		188.2	1.34934	2.64126	4.22516	5.09611	4.96686	2.89358	3.32561	0.964078		188.2	1.56849	1.87674	1.90089	1.67106	1.37113	1.30574	1.12762	0.687489		188.2	1.92642	2.28576	2.1113	2.34257	1.72563	1.16349	0.459252	-0.0487714
188.4	1.16826	2.3409	3.54144	4.24176	4.36651	1.92826	2.75502	0.666997			188.4	1.2295	2.19381	3.56668	4.94104	4.86108	2.76932	4.76836	1.5221		188.4	1.36318	2.64519	4.23143	5.09829	4.96857	2.8982	3.33257	0.964925		188.4	1.56821	1.87217	1.89974	1.66242	1.37513	1.30463	1.12395	0.686567		188.4	1.9272	2.28581	2.11147	2.34076	1.72551	1.16199	0.459387	-0.0474388
188.6	1.16949	2.35393	3.54828	4.24385	4.37283	1.93452	2.75688	0.669279			188.6	1.23445	2.199	3.57351	4.94735	4.86922	2.77231	4.77369	1.52897		188.6	1.35473	2.65297	4.24013	5.10195	4.97204	2.90427	3.33942	0.965265		188.6	1.57066	1.87204	1.89778	1.66468	1.37149	1.30277	1.12139	0.683713		188.6	1.92777	2.28587	2.11341	2.34203	1.72696	1.16256	0.459875	-0.0483025
188.8	1.17137	2.36731	3.55576	4.24944	4.37552	1.93805	2.76467	0.671044			188.8	1.23425	2.20325	3.57948	4.95115	4.87722	2.77733	4.77696	1.52886		188.8	1.37162	2.65807	4.24815	5.11158	4.97775	2.90828	3.34363	0.9675		188.8	1.56652	1.87137	1.89867	1.66804	1.37489	1.30664	1.12265	0.680449		188.8	1.92793	2.28718	2.113	2.34382	1.72756	1.16205	0.462564	-0.0485282
189	1.17278	2.37768	3.56003	4.25325	4.38545	1.94173	2.77106	0.672963			189	1.23948	2.20848	3.58414	4.95496	4.88197	2.78185	4.78203	1.53039		189	1.36057	2.66276	4.24983	5.121	4.97901	2.91287	3.34808	0.968115		189	1.56837	1.87206	1.90496	1.66771	1.37341	1.3028	1.12767	0.687177		189	1.92872	2.28725	2.11386	2.34501	1.72922	1.16286	0.463464	-0.0468569
189.2	1.17454	2.38281	3.56635	4.26185	4.38908	1.94594	2.77354	0.673002			189.2	1.2381	2.21201	3.58981	4.96194	4.88754	2.78757	4.78605	1.5367		189.2	1.37254	2.66984	4.25567	5.12636	4.98077	2.91603	3.34976	0.969332		189.2	1.57418	1.87751	1.89764	1.66052	1.37507	1.30747	1.12587	0.687798		189.2	1.92875	2.2875	2.11405	2.34549	1.73039	1.16265	0.464251	-0.0454887
189.4	1.17213	2.38325	3.57314	4.26383	4.39159	1.94969	2.78349	0.674263			189.4	1.24268	2.21576	3.59878	4.97066	4.89217	2.79525	4.79243	1.53327		189.4	1.36542	2.675	4.26218	5.12865	4.98657	2.92184	3.35193	0.969209		189.4	1.57293	1.87556	1.90055	1.6619	1.37418	1.30183	1.12528	0.686749		189.4	1.92955	2.28766	2.11271	2.34719	1.73135	1.16288	0.465505	-0.0452941
189.6	1.17287	2.38031	3.57998	4.27295	4.39935	1.95242	2.78649	0.674472			189.6	1.24347	2.21772	3.60385	4.97539	4.89473	2.80133	4.79586	1.54114		189.6	1.37074	2.67863	4.26701	5.13322	4.99429	2.92824	3.35611	0.970901		189.6	1.57172	1.87625	1.90257	1.66396	1.37098	1.30283	1.12714	0.686668		189.6	1.93103	2.28831	2.11215	2.34565	1.72849	1.16381	0.465178	-0.0438745
189.8	1.17191	2.37604	3.58585	4.27847	4.40578	1.95733	2.79	0.675726			189.8	1.24539	2.22248	3.60913	4.98083	4.89738	2.80577	4.80251	1.53749		189.8	1.37357	2.68576	4.26955	5.13984	4.99578	2.93453	3.35916	0.970403		189.8	1.56874	1.86903	1.89641	1.66508	1.37299	1.30341	1.12265	0.682042		189.8	1.93273	2.28894	2.1133	2.34459	1.73026	1.16465	0.465126	-0.0444736
190	1.17507	2.37231	3.58944	4.28723	4.40705	1.96052	2.79403	0.676476			190	1.24664	2.22557	3.6154	4.98549	4.9006	2.81304	4.80743	1.54099		190	1.37451	2.68924	4.27884	5.14546	5.00236	2.94048	3.36309	0.970976		190	1.56322	1.87576	1.8974	1.65875	1.3687	1.30458	1.12459	0.688489		190	1.93083	2.28866	2.11345	2.34478	1.73014	1.16578	0.464741	-0.0454229
190.2	1.17862	2.37217	3.59847	4.29255	4.416	1.96548	2.79799	0.67642			190.2	1.2511	2.23093	3.62035	4.99327	4.904	2.81518	4.81385	1.54455		190.2	1.38646	2.68993	4.28696	5.1509	5.00846	2.94745	3.36648	0.970488		190.2	1.56865	1.8768	1.903	1.66148	1.37274	1.30424	1.12569	0.683991		190.2	1.93037	2.29002	2.11292	2.3429	1.73004	1.16655	0.462583	-0.0472214
190.4	1.184	2.3769	3.60256	4.30011	4.42009	1.97091	2.80048	0.677766			190.4	1.25194	2.23537	3.62562	4.99789	4.90801	2.81436	4.81687	1.54581		190.4	1.38254	2.69565	4.29521	5.1552	5.01199	2.95566	3.37098	0.973368		190.4	1.56969	1.87783	1.90204	1.66364	1.37203	1.30059	1.12375	0.686249		190.4	1.92841	2.28922	2.11348	2.34264	1.73102	1.16715	0.460426	-0.0471874
190.6	1.1898	2.3851	3.60368	4.3084	4.42123	1.9742	2.80696	0.679223			190.6	1.25466	2.23936	3.63083	5.00436	4.91362	2.82261	4.82211	1.55561		190.6	1.39985	2.69921	4.29947	5.15833	5.01393	2.95862	3.37436	0.975342		190.6	1.57051	1.87433	1.90061	1.6663	1.37237	1.30465	1.12024	0.688599		190.6	1.92899	2.28929	2.11371	2.34373	1.7313	1.16558	0.459993	-0.0493503
190.8	1.19337	2.39881	3.61462	4.31288	4.43108	1.97857	2.8078	0.678661			190.8	1.2587	2.24209	3.63718	5.00961	4.92127	2.83206	4.82653	1.55196		190.8	1.38751	2.7013	4.30751	5.16307	5.02375	2.96502	3.38662	0.977538		190.8	1.57086	1.87442	1.90001	1.66366	1.37241	1.30301	1.12396	0.684893		190.8	1.92887	2.28951	2.11121	2.34438	1.72982	1.16668	0.459528	-0.0494264
191	1.19719	2.41184	3.61746	4.31793	4.4367	1.98365	2.81537	0.680228			191	1.26016	2.24545	3.64295	5.01962	4.92924	2.83576	4.83051	1.55829		191	1.4021	2.70649	4.31117	5.16899	5.02556	2.97079	3.39392	0.978735		191	1.57064	1.87362	1.89801	1.66261	1.36918	1.30003	1.12054	0.686902		191	1.92954	2.29015	2.10893	2.34384	1.72979	1.16656	0.459297	-0.0505691
191.2	1.19811	2.42243	3.62372	4.31943	4.43871	1.98643	2.82156	0.68395			191.2	1.26277	2.24827	3.65195	5.02628	4.9371	2.8415	4.83491	1.55807		191.2	1.38876	2.71203	4.31498	5.17582	5.03333	2.97819	3.40393	0.982642		191.2	1.57092	1.86723	1.89975	1.65983	1.36858	1.30235	1.12387	0.68555		191.2	1.92928	2.29172	2.10941	2.34517	1.7317	1.16597	0.460032	-0.0495812
191.4	1.20486	2.42961	3.63042	4.32453	4.44996	1.98976	2.82585	0.684598			191.4	1.26513	2.25204	3.657	5.03221	4.94369	2.85026	4.84153	1.55822		191.4	1.40644	2.71413	4.31938	5.18251	5.03851	2.98303	3.41071	0.98353		191.4	1.56977	1.87694	1.90343	1.66247	1.37153	1.30339	1.12552	0.685696		191.4	1.92901	2.29365	2.11147	2.34548	1.73023	1.16609	0.462803	-0.0516046
191.6	1.20812	2.43511	3.63393	4.326	4.45779	1.99333	2.82563	0.686338			191.6	1.26897	2.25667	3.6646	5.03479	4.94879	2.85377	4.84644	1.56231		191.6	1.39391	2.71983	4.32789	5.18455	5.04469	2.9907	3.41709	0.98492		191.6	1.57376	1.87407	1.90334	1.66351	1.37373	1.30172	1.1281	0.685664		191.6	1.92804	2.2928	2.11163	2.34528	1.73193	1.16741	0.460957	-0.0496422
191.8	1.21079	2.43329	3.64165	4.33273	4.46092	1.99605	2.83198	0.689069			191.8	1.26865	2.26395	3.67089	5.04381	4.95187	2.85679	4.85182	1.55949		191.8	1.40796	2.72763	4.33248	5.1882	5.04329	2.99614	3.41819	0.988652		191.8	1.56826	1.87349	1.90215	1.664	1.36944	1.30235	1.12589	0.686294		191.8	1.92732	2.2916	2.11225	2.34471	1.73075	1.16702	0.461524	-0.0495448
192	1.21051	2.43131	3.64691	4.33839	4.4709	2.00077	2.82982	0.689539			192	1.27322	2.26895	3.67706	5.04986	4.95693	2.86021	4.85698	1.56979		192	1.40268	2.73289	4.33978	5.19316	5.0499	3.00211	3.42212	0.992824		192	1.57251	1.878	1.9002	1.66482	1.37447	1.30214	1.12533	0.686799		192	1.92651	2.29214	2.11443	2.3455	1.73099	1.16701	0.459238	-0.0484321
192.2	1.21366	2.42653	3.65249	4.3488	4.4751	2.0047	2.83239	0.690833			192.2	1.27369	2.27294	3.6818	5.05548	4.96097	2.86813	4.86186	1.5649		192.2	1.41336	2.7377	4.34616	5.19964	5.05684	3.00612	3.42378	0.994502		192.2	1.57575	1.87465	1.90393	1.66346	1.37534	1.30113	1.12356	0.685931		192.2	1.92797	2.28979	2.11496	2.34448	1.73139	1.16702	0.457811	-0.0495832
192.4	1.20999	2.42434	3.65937	4.35614	4.47438	2.01088	2.83514	0.691479			192.4	1.27823	2.27792	3.68809	5.05779	4.96419	2.87469	4.86334	1.57279		192.4	1.41116	2.74397	4.35073	5.20506	5.05958	3.01077	3.4266	0.997382		192.4	1.56686	1.87264	1.90113	1.66306	1.37313	1.30161	1.12541	0.687147		192.4	1.92896	2.28902	2.11484	2.34544	1.73091	1.16672	0.456893	-0.0470197
192.6	1.21081	2.42402	3.66542	4.36326	4.48222	2.01682	2.84044	0.692726			192.6	1.27756	2.28272	3.69283	5.06353	4.96919	2.87819	4.86916	1.57405		192.6	1.41633	2.74929	4.35502	5.2109	5.06246	3.01648	3.42945	1.00027		192.6	1.57243	1.87634	1.90093	1.66562	1.37012	1.30355	1.12577	0.685052		192.6	1.92943	2.28883	2.11404	2.34568	1.73118	1.16561	0.458443	-0.0495344
192.8	1.21177	2.43008	3.67199	4.36504	4.48622	2.02212	2.84256	0.693899			192.8	1.28205	2.28417	3.69923	5.07015	4.97463	2.88249	4.87113	1.57458		192.8	1.42173	2.75456	4.36128	5.21352	5.07067	3.02101	3.43839	1.0013		192.8	1.57645	1.878	1.9033	1.66426	1.37368	1.30119	1.12657	0.687607		192.8	1.9289	2.29059	2.11652	2.34544	1.7344	1.16367	0.457033	-0.0491219
193	1.21594	2.4378	3.67765	4.37213	4.48824	2.02748	2.84919	0.698164			193	1.281	2.28927	3.70692	5.07683	4.97832	2.88649	4.87712	1.58346		193	1.41789	2.75789	4.3666	5.21668	5.07493	3.02535	3.44088	1.00166		193	1.57427	1.87546	1.89794	1.66354	1.36962	1.30287	1.12806	0.68353		193	1.93021	2.29081	2.11591	2.3453	1.73245	1.16196	0.457697	-0.0491641
193.2	1.21657	2.45228	3.67986	4.37565	4.4987	2.03112	2.85445	0.698107			193.2	1.28634	2.29303	3.71321	5.08074	4.98412	2.89074	4.87988	1.57935		193.2	1.42691	2.76256	4.37142	5.22086	5.07568	3.02838	3.44588	1.00148		193.2	1.56839	1.87626	1.89887	1.6638	1.36947	1.30214	1.11622	0.685201		193.2	1.92824	2.29067	2.11474	2.3481	1.72966	1.16134	0.460216	-0.0479263
193.4	1.21738	2.4646	3.68932	4.38069	4.50359	2.03221	2.85445	0.699514			193.4	1.28509	2.29737	3.71868	5.08743	4.99029	2.89227	4.88839	1.58941		193.4	1.41988	2.77028	4.37919	5.22617	5.081	3.03514	3.45232	1.0022		193.4	1.57168	1.87444	1.89784	1.66219	1.37097	1.30262	1.12181	0.680519		193.4	1.9289	2.29093	2.11364	2.3465	1.73232	1.16224	0.457928	-0.049294
193.6	1.21611	2.47594	3.69035	4.3829	4.50546	2.035	2.86074	0.700453			193.6	1.28987	2.30178	3.72321	5.09689	4.99386	2.89985	4.8893	1.58423		193.6	1.43208	2.77649	4.38495	5.2309	5.08621	3.04145	3.46032	1.00259		193.6	1.56841	1.87506	1.90087	1.66339	1.37304	1.30302	1.12114	0.689825		193.6	1.92979	2.29247	2.11403	2.34656	1.73066	1.16303	0.458067	-0.0466815
193.8	1.22054	2.48288	3.6961	4.39177	4.51574	2.0404	2.86272	0.701178			193.8	1.28936	2.30616	3.72811	5.10344	4.99767	2.90121	4.89981	1.58993		193.8	1.4226	2.78087	4.39228	5.23514	5.08861	3.04856	3.46733	1.00268		193.8	1.57111	1.87255	1.9042	1.66214	1.37039	1.30684	1.12133	0.684548		193.8	1.93015	2.29201	2.11001	2.34656	1.72964	1.16505	0.457295	-0.04775
194	1.22111	2.48851	3.70539	4.39725	4.52051	2.04165	2.86617	0.70119			194	1.29431	2.31059	3.73203	5.10835	5.00218	2.90921	4.90204	1.59557		194	1.44268	2.78874	4.39813	5.23901	5.09521	3.05663	3.47762	1.0034		194	1.57368	1.87674	1.90267	1.65957	1.37338	1.29877	1.12303	0.683508		194	1.92977	2.29052	2.11034	2.34608	1.73059	1.16739	0.459435	-0.047502
194.2	1.2219	2.48739	3.70524	4.4014	4.52298	2.04715	2.86951	0.702353			194.2	1.29302	2.3164	3.73778	5.11149	5.00444	2.91168	4.91092	1.59317		194.2	1.42981	2.79774	4.40405	5.24587	5.09625	3.06492	3.48506	1.00411		194.2	1.57314	1.88024	1.89778	1.6642	1.37191	1.30104	1.12251	0.684945		194.2	1.93064	2.29126	2.11118	2.34512	1.73272	1.16733	0.46011	-0.0472205
194.4	1.22706	2.48432	3.71492	4.40596	4.53239	2.05113	2.87628	0.703835			194.4	1.29747	2.3214	3.74411	5.11979	5.00861	2.91511	4.91097	1.60204		194.4	1.44791	2.80199	4.40934	5.2494	5.10113	3.06957	3.49096	1.00513		194.4	1.57236	1.87261	1.90277	1.65936	1.36875	1.30332	1.12533	0.683266		194.4	1.93019	2.29209	2.11167	2.34678	1.73087	1.16685	0.460831	-0.0469884
194.6	1.22913	2.47952	3.72213	4.41453	4.53815	2.05477	2.87922	0.70671			194.6	1.29885	2.3243	3.75177	5.12586	5.01478	2.91832	4.9212	1.59723		194.6	1.43551	2.80814	4.4173	5.25408	5.10673	3.07532	3.4966	1.00632		194.6	1.57311	1.87652	1.90257	1.66198	1.37123	1.30043	1.12023	0.684118		194.6	1.9289	2.29231	2.11379	2.34581	1.73142	1.16621	0.461597	-0.0484805
194.8	1.22866	2.47824	3.72254	4.41983	4.53914	2.05906	2.88568	0.709684			194.8	1.30295	2.32805	3.75692	5.132	5.02117	2.92862	4.91856	1.60845		194.8	1.45341	2.81176	4.42059	5.25845	5.1135	3.08006	3.49999	1.00638		194.8	1.57267	1.87536	1.90446	1.66463	1.371	1.29828	1.1219	0.684893		194.8	1.92918	2.29287	2.11435	2.34552	1.73043	1.16608	0.461607	-0.0479964
195	1.2294	2.47774	3.73227	4.42122	4.54634	2.06332	2.88839	0.710492			195	1.30493	2.33161	3.76288	5.13398	5.02612	2.92843	4.92806	1.60352		195	1.43972	2.81515	4.42365	5.2633	5.11626	3.08476	3.50178	1.00794		195	1.57003	1.87864	1.89829	1.65369	1.37307	1.30056	1.12441	0.685193		195	1.92983	2.29639	2.11766	2.34552	1.73127	1.1641	0.459751	-0.048061
195.2	1.23204	2.48242	3.73697	4.42766	4.5506	2.06641	2.89328	0.712032			195.2	1.3084	2.33457	3.7681	5.1428	5.03107	2.93749	4.92567	1.60647		195.2	1.45627	2.81509	4.42952	5.26797	5.12427	3.09083	3.50379	1.00936		195.2	1.56991	1.87621	1.89941	1.6606	1.37244	1.29783	1.12337	0.681651		195.2	1.9297	2.29699	2.11586	2.3455	1.73202	1.16396	0.459894	-0.0482376
195.4	1.23323	2.49168	3.74259	4.43413	4.5517	2.07323	2.89809	0.71286			195.4	1.31148	2.33898	3.77348	5.14957	5.03528	2.94445	4.93556	1.61087		195.4	1.44828	2.81876	4.43534	5.27544	5.12714	3.0976	3.50769	1.01047		195.4	1.57353	1.87067	1.90568	1.66244	1.37278	1.30457	1.12489	0.6858		195.4	1.92978	2.29655	2.11623	2.34345	1.73222	1.16316	0.461782	-0.0474416
195.6	1.23738	2.50515	3.74771	4.44046	4.56055	2.07784	2.90486	0.711845			195.6	1.31263	2.34414	3.77918	5.1554	5.04107	2.95004	4.93408	1.60809		195.6	1.45945	2.81646	4.4377	5.27898	5.12993	3.10379	3.51042	1.01225		195.6	1.57069	1.87463	1.90291	1.66147	1.36759	1.30413	1.12134	0.683855		195.6	1.93138	2.29534	2.11321	2.34352	1.73243	1.16306	0.460779	-0.0468502
195.8	1.23945	2.51904	3.75591	4.44581	4.56734	2.08181	2.90929	0.711744			195.8	1.31603	2.34872	3.78511	5.15871	5.04849	2.95299	4.94477	1.6191		195.8	1.45658	2.81908	4.44408	5.28352	5.13349	3.10845	3.51664	1.01437		195.8	1.56979	1.87299	1.90277	1.66538	1.37288	1.30146	1.12093	0.683156		195.8	1.93149	2.29347	2.11459	2.3444	1.73232	1.16299	0.463764	-0.0465277
196	1.24067	2.5302	3.76105	4.4518	4.56918	2.08719	2.91502	0.712799			196	1.31609	2.35272	3.79072	5.16429	5.05341	2.96259	4.94323	1.61257		196	1.46233	2.82228	4.45129	5.28832	5.13761	3.1139	3.52274	1.01568		196	1.56707	1.87278	1.90035	1.66217	1.37112	1.29719	1.12392	0.68436		196	1.93078	2.29173	2.11193	2.34512	1.73254	1.16283	0.466513	-0.0458459
196.2	1.24064	2.53803	3.76591	4.45701	4.57622	2.09089	2.91732	0.712592			196.2	1.31904	2.35721	3.79637	5.17276	5.05961	2.96544	4.95387	1.62506		196.2	1.46232	2.82856	4.45833	5.2927	5.14237	3.1203	3.53145	1.01868		196.2	1.56975	1.87446	1.89892	1.66035	1.36976	1.29788	1.12166	0.684101		196.2	1.93287	2.2927	2.11419	2.34465	1.73097	1.16371	0.464645	-0.045153
196.4	1.24275	2.541	3.7712	4.46179	4.58487	2.09311	2.91893	0.713636			196.4	1.31931	2.35978	3.80148	5.17754	5.06694	2.9711	4.95445	1.62125		196.4	1.46463	2.83064	4.4643	5.29784	5.14768	3.12593	3.5377	1.01969		196.4	1.57213	1.87325	1.89997	1.66218	1.36984	1.29643	1.12789	0.686044		196.4	1.93257	2.2932	2.11365	2.34596	1.73278	1.16508	0.462857	-0.0464938
196.6	1.24409	2.53902	3.77734	4.46563	4.58491	2.09848	2.92248	0.71193			196.6	1.32333	2.3634	3.8059	5.18036	5.0722	2.9723	4.9634	1.62646		196.6	1.47207	2.838	4.47235	5.30354	5.15174	3.13064	3.54386	1.02255		196.6	1.56905	1.87357	1.90371	1.65848	1.36847	1.30031	1.11971	0.687099		196.6	1.9316	2.29415	2.11798	2.34688	1.73228	1.16617	0.46181	-0.0454777
196.8	1.24601	2.53427	3.78047	4.47139	4.59259	2.10224	2.92651	0.713057			196.8	1.32229	2.36808	3.8121	5.18505	5.07452	2.97291	4.96257	1.6281		196.8	1.46478	2.84646	4.48009	5.30893	5.15609	3.1369	3.55054	1.02612		196.8	1.57465	1.87742	1.90379	1.66301	1.3695	1.30116	1.12309	0.683202		196.8	1.93214	2.29544	2.11755	2.34668	1.73364	1.16613	0.460856	-0.0466909
197	1.25192	2.53031	3.78471	4.47783	4.60136	2.1069	2.9293	0.713545			197	1.32675	2.37292	3.81902	5.19562	5.07979	2.97501	4.97256	1.62474		197	1.48023	2.85068	4.48592	5.31308	5.16008	3.14174	3.55777	1.02791		197	1.57151	1.87574	1.89897	1.66141	1.36658	1.30184	1.1253	0.684756		197	1.93333	2.29497	2.11783	2.34686	1.73379	1.16583	0.458587	-0.0491133
197.2	1.25701	2.52913	3.79144	4.4827	4.60336	2.1108	2.93807	0.715245			197.2	1.32682	2.37762	3.8258	5.19957	5.08243	2.9822	4.97333	1.63458		197.2	1.47131	2.85243	4.49251	5.31857	5.16319	3.14848	3.56229	1.03021		197.2	1.57313	1.87564	1.90622	1.66042	1.37086	1.29691	1.1209	0.684623		197.2	1.93189	2.29512	2.11607	2.34805	1.73529	1.16551	0.45992	-0.0504682
197.4	1.25808	2.53434	3.79731	4.48725	4.60727	2.11302	2.9446	0.717291			197.4	1.33159	2.38229	3.8309	5.20347	5.08591	2.9856	4.97845	1.62753		197.4	1.4863	2.85905	4.49521	5.32288	5.16956	3.15323	3.56614	1.03364		197.4	1.56747	1.87626	1.90349	1.66232	1.37116	1.30288	1.12222	0.687908		197.4	1.93366	2.29518	2.11705	2.34785	1.73384	1.1644	0.46084	-0.0486164
197.6	1.25707	2.54502	3.807	4.49344	4.61594	2.11593	2.94706	0.720455			197.6	1.33139	2.38768	3.83668	5.20788	5.08845	2.99294	4.98145	1.63751		197.6	1.47591	2.86274	4.50222	5.32728	5.17373	3.15821	3.57108	1.03399		197.6	1.57463	1.87493	1.9005	1.66329	1.36984	1.30347	1.11827	0.682968		197.6	1.9334	2.29649	2.11382	2.34693	1.73489	1.16337	0.463505	-0.0500183
197.8	1.25969	2.56017	3.80928	4.4992	4.61766	2.12071	2.95243	0.723057			197.8	1.33624	2.39106	3.84398	5.21707	5.09312	3.00048	4.9858	1.63649		197.8	1.49676	2.86394	4.50454	5.3307	5.17755	3.1631	3.57418	1.03486		197.8	1.57091	1.87725	1.90128	1.66182	1.36995	1.29627	1.12136	0.68361		197.8	1.93421	2.29727	2.11483	2.34812	1.7328	1.16348	0.462701	-0.0488321
198	1.2587	2.5735	3.82114	4.50482	4.62091	2.1222	2.9583	0.724296			198	1.3381	2.39512	3.84903	5.2216	5.09793	3.00698	4.98781	1.64216		198	1.48098	2.87032	4.51171	5.33392	5.1823	3.16772	3.57806	1.03749		198	1.56885	1.87811	1.89992	1.65999	1.3685	1.29873	1.12253	0.682657		198	1.93393	2.2979	2.11569	2.34828	1.7323	1.16459	0.463458	-0.0469909
198.2	1.25987	2.58284	3.82498	4.51044	4.63004	2.12854	2.96069	0.726662			198.2	1.34122	2.39843	3.85314	5.22608	5.10429	3.01369	4.9917	1.64971		198.2	1.50154	2.87584	4.51648	5.33635	5.18485	3.1721	3.58291	1.03887		198.2	1.57073	1.87222	1.9031	1.65923	1.36641	1.30202	1.12019	0.680172		198.2	1.93463	2.29793	2.11783	2.34884	1.73321	1.16592	0.462315	-0.0460617
198.4	1.263	2.58717	3.82653	4.51726	4.6322	2.13431	2.96456	0.727819			198.4	1.34294	2.40166	3.8603	5.22854	5.10787	3.02061	4.99813	1.64599		198.4	1.48734	2.87932	4.52338	5.34145	5.18695	3.17869	3.58851	1.04078		198.4	1.57502	1.88084	1.90311	1.65927	1.37432	1.29765	1.12139	0.684802		198.4	1.93357	2.29759	2.11689	2.34982	1.73414	1.16745	0.463827	-0.0472614
198.6	1.26921	2.58597	3.83872	4.52154	4.63374	2.1378	2.96178	0.72644			198.6	1.34634	2.40511	3.86722	5.23779	5.1142	3.02183	4.99865	1.65569		198.6	1.50701	2.88422	4.52785	5.3468	5.1905	3.18493	3.59395	1.04271		198.6	1.57498	1.87308	1.89936	1.66429	1.37392	1.30045	1.12286	0.683347		198.6	1.93413	2.29687	2.11785	2.35089	1.73256	1.16805	0.46103	-0.0467097
198.8	1.27449	2.58035	3.84146	4.52321	4.64315	2.14261	2.96195	0.725536			198.8	1.34936	2.41006	3.87207	5.24381	5.11708	3.02655	5.0059	1.64861		198.8	1.49411	2.89022	4.53666	5.35073	5.19527	3.19131	3.59906	1.04535		198.8	1.57695	1.87805	1.9013	1.66146	1.36657	1.3041	1.12295	0.683552		198.8	1.93384	2.29792	2.11804	2.35009	1.73527	1.1674	0.459576	-0.048023
199	1.27805	2.57639	3.84476	4.52567	4.64796	2.14825	2.96794	0.724597			199	1.34957	2.41373	3.87853	5.24721	5.12144	3.03373	5.00704	1.6557		199	1.51189	2.89311	4.54222	5.35358	5.1973	3.19656	3.60368	1.04414		199	1.57307	1.87487	1.905	1.65854	1.37127	1.29966	1.11707	0.685553		199	1.93453	2.29712	2.11712	2.34946	1.73478	1.1674	0.45908	-0.0478338
199.2	1.27708	2.57676	3.85332	4.53111	4.64998	2.15309	2.96373	0.725428			199.2	1.35464	2.41857	3.88422	5.24802	5.12686	3.03468	5.01575	1.65232		199.2	1.49812	2.89892	4.54645	5.35648	5.20536	3.19894	3.61063	1.04493		199.2	1.57507	1.87477	1.90566	1.65992	1.36802	1.29727	1.12142	0.68524		199.2	1.93606	2.29603	2.11656	2.34812	1.73189	1.16601	0.460707	-0.0464318
199.4	1.281	2.5806	3.85369	4.53383	4.65948	2.15834	2.96662	0.726706			199.4	1.35416	2.42411	3.89014	5.25578	5.13173	3.04009	5.01431	1.65702		199.4	1.51207	2.90349	4.55176	5.35977	5.20961	3.20389	3.61687	1.04447		199.4	1.56823	1.87622	1.90398	1.65963	1.36925	1.30328	1.12092	0.683164		199.4	1.93508	2.29496	2.11924	2.34835	1.73197	1.16434	0.457104	-0.0461536
199.6	1.28375	2.59133	3.86138	4.53933	4.66692	2.16225	2.9787	0.729877			199.6	1.35854	2.42827	3.89586	5.25977	5.13662	3.04676	5.02304	1.6643		199.6	1.50152	2.90879	4.55579	5.36323	5.21535	3.20945	3.62156	1.04446		199.6	1.57311	1.87955	1.9033	1.66322	1.3686	1.29902	1.12149	0.682594		199.6	1.93575	2.295	2.11888	2.34986	1.73333	1.16394	0.457442	-0.0466
199.8	1.2831	2.60681	3.86729	4.54917	4.66756	2.16761	2.98307	0.731488			199.8	1.35953	2.43235	3.90049	5.26412	5.14224	3.05132	5.02327	1.6622		199.8	1.51392	2.91172	4.55899	5.36805	5.21778	3.2143	3.62816	1.0433		199.8	1.57395	1.87811	1.90267	1.6647	1.37256	1.30087	1.12497	0.679958		199.8	1.93497	2.29529	2.11957	2.3504	1.73246	1.16452	0.460869	-0.045065
200	1.28582	2.618	3.86827	4.5551	4.67468	2.17249	2.9844	0.735173			200	1.36406	2.43516	3.90592	5.26561	5.14662	3.05457	5.03442	1.67484		200	1.50733	2.91778	4.56308	5.37262	5.22078	3.22029	3.63492	1.04511		200	1.57446	1.87853	1.90189	1.65795	1.36854	1.29374	1.12123	0.679792		200	1.93521	2.29652	2.12017	2.34975	1.73269	1.16392	0.460032	-0.0462607
200.2	1.29137	2.62729	3.87997	4.55729	4.68268	2.17452	2.99277	0.735947			200.2	1.3637	2.44097	3.91284	5.27625	5.15248	3.06332	5.03227	1.66742		200.2	1.51981	2.9199	4.56718	5.37924	5.21963	3.2285	3.6388	1.04494		200.2	1.57134	1.87237	1.89854	1.65864	1.37065	1.29981	1.11701	0.685666		200.2	1.93484	2.29801	2.1186	2.35034	1.7359	1.16419	0.457156	-0.0485691
200.4	1.29298	2.63102	3.88368	4.56173	4.68322	2.17876	2.99595	0.736491			200.4	1.36832	2.4449	3.91738	5.28277	5.15864	3.06574	5.04232	1.67375		200.4	1.51586	2.92669	4.56967	5.38321	5.22399	3.23661	3.64357	1.04611		200.4	1.57244	1.87816	1.90215	1.65916	1.36544	1.2981	1.11511	0.689218		200.4	1.93557	2.29969	2.1175	2.34897	1.73621	1.16451	0.458747	-0.0481617
200.6	1.29424	2.62732	3.88812	4.56742	4.68741	2.18331	2.99748	0.737453			200.6	1.36923	2.44944	3.92273	5.28812	5.16289	3.07085	5.04242	1.67124		200.6	1.52654	2.93579	4.57494	5.38788	5.22639	3.2419	3.6486	1.04865		200.6	1.57254	1.87334	1.89828	1.66039	1.3646	1.29953	1.12057	0.682863		200.6	1.93629	2.30076	2.1176	2.34823	1.73361	1.16545	0.458659	-0.0472214
200.8	1.29383	2.62083	3.89616	4.56859	4.69591	2.18674	3.00301	0.738476			200.8	1.37142	2.45322	3.92956	5.29115	5.16783	3.07013	5.04839	1.6735		200.8	1.52699	2.94498	4.57933	5.39585	5.23117	3.2474	3.65181	1.05174		200.8	1.57044	1.87851	1.90312	1.65697	1.37057	1.30091	1.11923	0.681857		200.8	1.93727	2.29964	2.11698	2.34975	1.73427	1.16439	0.457252	-0.0486006
201	1.29803	2.61778	3.90049	4.5741	4.69843	2.19087	3.00697	0.736785			201	1.37525	2.45932	3.9352	5.30137	5.17272	3.07497	5.04669	1.67965		201	1.5318	2.94975	4.58525	5.39915	5.23695	3.25273	3.65585	1.05366		201	1.57166	1.8769	1.90213	1.66159	1.36378	1.30353	1.12138	0.680892		201	1.93656	2.2999	2.11736	2.35076	1.73563	1.1649	0.459404	-0.0480239
201.2	1.3001	2.61693	3.90693	4.58139	4.69872	2.19514	3.01146	0.737813			201.2	1.37689	2.46007	3.93959	5.30647	5.17637	3.07596	5.05473	1.6769		201.2	1.53053	2.95727	4.59098	5.40055	5.24126	3.25545	3.65834	1.05619		201.2	1.57414	1.87592	1.9006	1.66086	1.36485	1.30375	1.12005	0.682803		201.2	1.93536	2.30033	2.11883	2.35124	1.73471	1.16535	0.461317	-0.0480491
201.4	1.30135	2.61939	3.9112	4.58991	4.70732	2.19822	3.01471	0.737442			201.4	1.37944	2.46428	3.94414	5.31172	5.17898	3.0829	5.05415	1.68798		201.4	1.53717	2.96257	4.59924	5.40514	5.24402	3.25941	3.66332	1.05745		201.4	1.57137	1.87529	1.90562	1.66015	1.36989	1.29814	1.11633	0.683853		201.4	1.9357	2.30003	2.12042	2.35174	1.7341	1.16551	0.459512	-0.0485796
201.6	1.30085	2.63025	3.91564	4.59545	4.71093	2.20312	3.0175	0.740296			201.6	1.3795	2.46768	3.94858	5.31289	5.18223	3.09035	5.06024	1.68376		201.6	1.53439	2.96366	4.60381	5.41128	5.24748	3.2652	3.66659	1.05846		201.6	1.57443	1.8805	1.90101	1.66077	1.37106	1.30136	1.12078	0.682042		201.6	1.93551	2.2985	2.12088	2.35147	1.73578	1.16597	0.46002	-0.0487112
201.8	1.30732	2.64461	3.92189	4.59973	4.71323	2.20729	3.02364	0.743896			201.8	1.38443	2.47165	3.95378	5.32171	5.1867	3.10068	5.06639	1.68993		201.8	1.53683	2.96278	4.61084	5.41316	5.25029	3.27097	3.67261	1.06155		201.8	1.57311	1.87559	1.89837	1.65873	1.37101	1.29864	1.12255	0.683777		201.8	1.93489	2.29968	2.12047	2.34926	1.7356	1.1673	0.460465	-0.0471651
202	1.30682	2.65696	3.92511	4.6042	4.72054	2.20949	3.02473	0.748873			202	1.38291	2.4745	3.95994	5.32673	5.19019	3.10421	5.07214	1.6923		202	1.54065	2.96659	4.61402	5.41825	5.25482	3.27711	3.67632	1.06428		202	1.57174	1.87815	1.90242	1.6586	1.36989	1.29773	1.11815	0.679226		202	1.93354	2.29851	2.12077	2.34917	1.73454	1.16734	0.458449	-0.048879
202.2	1.30915	2.66687	3.93209	4.6082	4.72804	2.2149	3.03222	0.749539			202.2	1.38708	2.48069	3.9656	5.33053	5.19155	3.10827	5.07651	1.69243		202.2	1.54251	2.96868	4.6185	5.42178	5.25876	3.2854	3.68473	1.06535		202.2	1.57424	1.88031	1.90481	1.6615	1.37079	1.30159	1.12014	0.6838		202.2	1.93364	2.29839	2.12047	2.34879	1.73259	1.16693	0.457737	-0.0486108
202.4	1.31053	2.67581	3.93869	4.61004	4.72686	2.2195	3.03485	0.750807			202.4	1.38703	2.48253	3.97353	5.3311	5.19512	3.11182	5.08004	1.70194		202.4	1.54659	2.97325	4.62227	5.42459	5.26012	3.29161	3.69208	1.06891		202.4	1.57742	1.87496	1.89736	1.66083	1.37051	1.29747	1.11795	0.679543		202.4	1.9333	2.29912	2.11912	2.34923	1.73089	1.16788	0.457696	-0.0486767
202.6	1.31445	2.67681	3.94066	4.6154	4.73448	2.22145	3.04026	0.751835			202.6	1.39279	2.4867	3.97985	5.34094	5.19931	3.11641	5.08828	1.69491		202.6	1.54876	2.97869	4.62814	5.42696	5.26366	3.29662	3.6985	1.07133		202.6	1.57226	1.87684	1.901	1.6583	1.36728	1.29658	1.11635	0.683501		202.6	1.93385	2.29926	2.12087	2.34884	1.73195	1.16663	0.458316	-0.0496796
202.8	1.31496	2.67448	3.95055	4.62056	4.74212	2.22554	3.0437	0.753839			202.8	1.39211	2.49026	3.98513	5.34648	5.20352	3.12064	5.08737	1.70725		202.8	1.55013	2.98449	4.63639	5.43294	5.26709	3.30135	3.70256	1.07151		202.8	1.56947	1.87954	1.90443	1.65729	1.36821	1.30071	1.11973	0.677278		202.8	1.93431	2.30024	2.12169	2.34917	1.73194	1.16563	0.459406	-0.0514196
203	1.3157	2.67099	3.95225	4.62402	4.74256	2.23068	3.05204	0.75362			203	1.39681	2.4952	3.98915	5.34844	5.21153	3.12555	5.0963	1.6987		203	1.55269	2.98701	4.645	5.43525	5.26848	3.30787	3.70805	1.0733		203	1.57413	1.88104	1.90456	1.66225	1.37068	1.29827	1.11941	0.68413		203	1.9369	2.30108	2.12235	2.34897	1.73196	1.16596	0.458861	-0.0485964
203.2	1.31858	2.66927	3.95584	4.62794	4.74775	2.23346	3.05571	0.755585			203.2	1.39766	2.50068	3.99384	5.35051	5.21658	3.12981	5.09367	1.70881		203.2	1.55512	2.99263	4.65372	5.43913	5.27243	3.31168	3.71108	1.07466		203.2	1.57761	1.88102	1.90332	1.66	1.36631	1.298	1.12136	0.683687		203.2	1.93866	2.30207	2.12266	2.34987	1.73444	1.16614	0.461686	-0.0497007
203.4	1.32115	2.66863	3.96294	4.63156	4.75843	2.23845	3.0624	0.757876			203.4	1.40139	2.50735	3.99825	5.35964	5.22047	3.1364	5.10189	1.70547		203.4	1.55952	2.99749	4.66043	5.44226	5.27817	3.31612	3.71264	1.07528		203.4	1.57338	1.87646	1.9003	1.6598	1.36731	1.30072	1.12004	0.681148		203.4	1.93974	2.30248	2.12164	2.34973	1.73521	1.16564	0.46239	-0.049527
203.6	1.32203	2.67589	3.96699	4.63592	4.7601	2.24369	3.06096	0.758539			203.6	1.40267	2.51213	4.00518	5.36351	5.22634	3.13956	5.09925	1.70778		203.6	1.56036	2.99768	4.66654	5.44674	5.28014	3.31953	3.71648	1.07563		203.6	1.56893	1.87707	1.9056	1.65902	1.36685	1.29665	1.1132	0.682056		203.6	1.9398	2.30245	2.12098	2.35059	1.73518	1.16628	0.462339	-0.0488546
203.8	1.32293	2.68957	3.97493	4.64061	4.76473	2.24858	3.06132	0.757431			203.8	1.40529	2.51738	4.00942	5.36673	5.22957	3.1443	5.10641	1.71584		203.8	1.56761	3.00191	4.66642	5.44875	5.28536	3.3254	3.71919	1.07642		203.8	1.57309	1.87883	1.90241	1.65703	1.36874	1.29698	1.11591	0.679589		203.8	1.94176	2.30087	2.12034	2.35042	1.73543	1.16686	0.460988	-0.0478016
204	1.32481	2.70239	3.98058	4.64859	4.77459	2.25329	3.06816	0.758409			204	1.4073	2.52048	4.01534	5.37085	5.22948	3.15044	5.10465	1.70982		204	1.56806	3.00782	4.66792	5.45322	5.28982	3.32934	3.72333	1.07716		204	1.57177	1.8764	1.90196	1.65598	1.3721	1.29998	1.11812	0.681315		204	1.94088	2.29913	2.11854	2.3514	1.73476	1.16801	0.461594	-0.049242
204.2	1.32631	2.71242	3.98188	4.65577	4.77842	2.25711	3.06851	0.759593			204.2	1.4083	2.52172	4.02058	5.38058	5.23576	3.15611	5.1141	1.72205		204.2	1.57626	3.01056	4.67245	5.45837	5.29277	3.33699	3.72693	1.07744		204.2	1.57542	1.87784	1.90566	1.65667	1.36801	1.29694	1.12231	0.684293		204.2	1.9394	2.2979	2.11945	2.35099	1.73226	1.16772	0.460892	-0.0471868
204.4	1.32704	2.72001	3.99043	4.66213	4.7795	2.25973	3.06869	0.762045			204.4	1.41232	2.52545	4.02575	5.38516	5.24147	3.15843	5.1142	1.71433		204.4	1.57189	3.01467	4.67496	5.46428	5.29839	3.3425	3.73483	1.07749		204.4	1.56792	1.87721	1.90429	1.65759	1.36377	1.29999	1.11525	0.679053		204.4	1.94081	2.2979	2.11978	2.35105	1.73272	1.16837	0.461276	-0.0492386
204.6	1.32964	2.71927	3.9917	4.66642	4.78646	2.26502	3.07852	0.762191			204.6	1.41333	2.53035	4.02891	5.38529	5.2448	3.16569	5.12117	1.72931		204.6	1.58214	3.0257	4.67992	5.46468	5.30325	3.35094	3.74087	1.0778		204.6	1.57526	1.88094	1.90344	1.66059	1.37112	1.30079	1.11759	0.680945		204.6	1.9412	2.29872	2.12037	2.35102	1.73471	1.16721	0.462069	-0.0486866
204.8	1.33177	2.7131	3.99811	4.67321	4.79153	2.26853	3.0808	0.761891			204.8	1.41747	2.5327	4.03433	5.39008	5.25013	3.16945	5.12458	1.72046		204.8	1.57755	3.03498	4.68851	5.46788	5.30322	3.35586	3.74984	1.07877		204.8	1.57435	1.87828	1.90313	1.65457	1.36466	1.30042	1.12181	0.685312		204.8	1.93873	2.29984	2.12057	2.35156	1.73493	1.16667	0.461075	-0.0475425
205	1.33531	2.70926	4.00407	4.67772	4.79061	2.2729	3.08113	0.762719			205	1.41998	2.53911	4.03916	5.39841	5.25556	3.17392	5.13101	1.72657		205	1.58644	3.04322	4.69582	5.47399	5.30677	3.35907	3.75638	1.07958		205	1.57005	1.88176	1.90188	1.66099	1.36633	1.2946	1.1171	0.685798		205	1.9389	2.30141	2.12239	2.35104	1.73499	1.16387	0.460387	-0.0484775
205.2	1.33862	2.70906	4.00713	4.68316	4.79686	2.27829	3.08656	0.76442			205.2	1.42319	2.54399	4.04625	5.40054	5.25767	3.17818	5.13302	1.73107		205.2	1.57935	3.0465	4.70126	5.47881	5.31101	3.3655	3.76263	1.08184		205.2	1.57469	1.87657	1.90102	1.65624	1.36639	1.2954	1.11649	0.679496		205.2	1.93808	2.30266	2.11882	2.35152	1.73657	1.1649	0.458587	-0.0503466
205.4	1.34331	2.71264	4.01335	4.68862	4.80335	2.28198	3.09283	0.763955			205.4	1.42407	2.54888	4.05257	5.40153	5.26063	3.18576	5.13433	1.72857		205.4	1.59108	3.04907	4.70933	5.48214	5.31366	3.36916	3.76376	1.08358		205.4	1.57492	1.88165	1.90412	1.66135	1.37076	1.29293	1.11811	0.679888		205.4	1.93715	2.30201	2.11976	2.35035	1.73552	1.16517	0.460692	-0.048737
205.6	1.34578	2.72342	4.01989	4.69219	4.80469	2.28623	3.09769	0.767133			205.6	1.42532	2.55039	4.05657	5.40906	5.2636	3.19027	5.13818	1.73825		205.6	1.58351	3.05237	4.71477	5.48604	5.3191	3.37322	3.76763	1.0857		205.6	1.57432	1.87856	1.9031	1.65697	1.37162	1.29792	1.11602	0.68705		205.6	1.93797	2.30179	2.11951	2.35	1.73553	1.16619	0.45962	-0.0496616
205.8	1.34841	2.73779	4.02392	4.69345	4.80858	2.29144	3.10258	0.767915			205.8	1.4293	2.55678	4.06121	5.41589	5.26723	3.19734	5.13893	1.73084		205.8	1.59738	3.05088	4.71685	5.49109	5.32487	3.37722	3.76712	1.08792		205.8	1.57634	1.87656	1.90404	1.66124	1.36801	1.30146	1.11529	0.682129		205.8	1.93948	2.30129	2.12115	2.35012	1.73529	1.16757	0.458455	-0.0503779
206	1.34848	2.74944	4.03019	4.69866	4.81699	2.29463	3.10441	0.767775			206	1.42938	2.55823	4.06775	5.41904	5.27209	3.20092	5.14553	1.74829		206	1.59086	3.05462	4.71892	5.49705	5.32923	3.38362	3.76946	1.08948		206	1.57302	1.88023	1.90246	1.65361	1.36452	1.29764	1.1155	0.680841		206	1.93819	2.30174	2.11743	2.35062	1.73513	1.16931	0.459216	-0.0480497
206.2	1.34825	2.75631	4.0348	4.70345	4.81807	2.29854	3.10655	0.768701			206.2	1.43373	2.56194	4.07243	5.41944	5.27683	3.20616	5.14493	1.7376		206.2	1.6056	3.06368	4.72238	5.50131	5.33209	3.38716	3.77113	1.09145		206.2	1.57154	1.87989	1.90268	1.66084	1.36303	1.29759	1.11796	0.679746		206.2	1.94109	2.3018	2.12097	2.35127	1.7338	1.16885	0.457544	-0.0467772
[truncated: 8,119 more rows]
