# Supplementary material for: Early steps of protein disaggregation by Hsp70 chaperone and class B J-domain proteins are shaped by Hsp110
Source: eLife. 2024 Oct 15;13:RP94795. doi: 10.7554/eLife.94795 (PMC11479587; doi:10.7554/eLife.94795)
Supplement: Figure 3—source data 5. [file elife-94795-fig3-data5.xlsx]

## Sheet: Fig. 3D - right panel
	Ssa1, Sis1			Ssa1, Ydj1
0	5.10504	5.25015	5.20509	1.67266	2.18991	1.82699
0.025	6.60654	6.30036	6.44392	2.00248	2.58965	2.20544
0.05	7.28031	7.32785	7.68153	1.95111	2.39199	2.34893
0.1	7.29165	8.10352	7.77167	1.52909	2.50792	1.72401
0.2	6.93656	7.37238	7.17519	1.1404	1.82035	0.875889
0.3	5.62571	5.96634	6.22787	1.01928	1.04989	0.722247
0.5	5.3465	6.52171	6.19861	0.817413	0.290923	0.57319
1	4.45175	5.28242	4.95674	0.426346	-0.0729618	0.358963
	model fitting:
	Ssa1, Sis1					Ssa1, Sis1					Ssa1, Ydj1
0	5.10504	5.25015	5.20509		0.1	7.29165	8.10352	7.77167		0.025	2.00248	2.58965	2.20544
0.025	6.60654	6.30036	6.44392		0.2	6.93656	7.37238	7.17519		0.05	1.95111	2.39199	2.34893
0.05	7.28031	7.32785	7.68153		0.3	5.62571	5.96634	6.22787		0.1	1.52909	2.50792	1.72401
0.1	7.29165	8.10352	7.77167		0.5	5.3465	6.52171	6.19861		0.2	1.1404	1.82035	0.875889
					1	4.45175	5.28242	4.95674		0.3	1.01928	1.04989	0.722247
										0.5	0.817413	0.290923	0.57319
										1	0.426346	-0.0729618	0.358963
Sigmoidal dose-response (variable slope)					Sigmoidal dose-response (variable slope)	Ambiguous				Sigmoidal dose-response (variable slope)
Best-fit values					Best-fit values					Best-fit values
Bottom	4.639				Bottom	4.781				Bottom	0.2414
Top	7.73				Top	~ 2178				Top	5.142
LogEC50	0.02039				LogEC50	~ -2,132				LogEC50	-0.02992
HillSlope	32.71				HillSlope	~ -1,286				HillSlope	-2.344
EC50	1.048				EC50	~ 0,007380				EC50	0.9334
Std. Error					Std. Error					Std. Error
Bottom	0.7601				Bottom	1.013				Bottom	0.2174
Top	0.1544				Top	~ 4,347e+006				Top	8.623
LogEC50	0.008337				LogEC50	~ 681,7				LogEC50	0.5867
HillSlope	14.74				HillSlope	~ 3,029				HillSlope	1.83
95% Confidence Intervals					95% Confidence Intervals					95% Confidence Intervals
Bottom	2,886 to 6,392				Bottom	2,551 to 7,010				Bottom	-0,2174 to 0,7002
Top	7,374 to 8,086				Top	(Very wide)				Top	-13,05 to 23,34
LogEC50	0,001162 to 0,03961				LogEC50	(Very wide)				LogEC50	-1,268 to 1,208
HillSlope	-1,284 to 66,70				HillSlope	(Very wide)				HillSlope	-6,204 to 1,517
EC50	1,003 to 1,095				EC50	(Very wide)				EC50	0,05397 to 16,14
Goodness of Fit					Goodness of Fit					Goodness of Fit
Degrees of Freedom	8				Degrees of Freedom	11				Degrees of Freedom	17
R square	0.9603				R square	0.8277				R square	0.874
Absolute Sum of Squares	0.4873				Absolute Sum of Squares	2.84				Absolute Sum of Squares	1.714
Sy.x	0.2468				Sy.x	0.5081				Sy.x	0.3175
Number of points					Number of points					Number of points
Analyzed	12				Analyzed	15				Analyzed	21
