# Supplementary material for: Early steps of protein disaggregation by Hsp70 chaperone and class B J-domain proteins are shaped by Hsp110
Source: eLife. 2024 Oct 15;13:RP94795. doi: 10.7554/eLife.94795 (PMC11479587; doi:10.7554/eLife.94795)
Supplement: Figure 3—source data 6. [file elife-94795-fig3-data6.xlsx]

## Sheet: Fig. 3E - left and middle panel
	Mean (N=3)													SD (N=3)
Time (h)	Ssa1 Sis1 Sse1_0µM	Ssa1 Sis1 Sse1_0.1µM	Ssa1 Sis1 Sse1_0.25µM	Ssa1 Sis1 Sse1_0.5µM	Ssa1 Sis1 Sse1_1µM	Ssa1 Sis1 Sse1_2µM	Ssa1 Sis1 Sse1-2_0µM	Ssa1 Sis1 Sse1-2_0.1µM	Ssa1 Sis1 Sse1-2_0.25µM	Ssa1 Sis1 Sse1-2_0.5µM	Ssa1 Sis1 Sse1-2_1µM	Ssa1 Sis1 Sse1-2_2µM		Ssa1 Sis1 Sse1_0µM	Ssa1 Sis1 Sse1_0.1µM	Ssa1 Sis1 Sse1_0.25µM	Ssa1 Sis1 Sse1_0.5µM	Ssa1 Sis1 Sse1_1µM	Ssa1 Sis1 Sse1_2µM	Ssa1 Sis1 Sse1-2_0µM	Ssa1 Sis1 Sse1-2_0.1µM	Ssa1 Sis1 Sse1-2_0.25µM	Ssa1 Sis1 Sse1-2_0.5µM	Ssa1 Sis1 Sse1-2_1µM	Ssa1 Sis1 Sse1-2_2µM
0	0.213183	0.213183	0.213183	0.213183	0.213183	0.213183	0.213183	0.213183	0.213183	0.213183	0.213183	0.213183		0.0412671	0.0412671	0.0412671	0.0412671	0.0412671	0.0412671	0.0412671	0.0412671	0.0412671	0.0412671	0.0412671	0.0412671
0.0333333	0.209233	0.219317	0.248467	0.26	0.250067	0.2254	0.202067	0.209633	0.2011	0.190567	0.215317	0.219217		0.0392258	0.0537935	0.0448862	0.028302	0.0438194	0.0520451	0.0528087	0.0444128	0.0533557	0.0412661	0.0585145	0.0347064
0.0666667	0.21945	0.263533	0.299183	0.329417	0.33855	0.286117	0.2147	0.2205	0.227367	0.229667	0.2278	0.255917		0.0421437	0.018704	0.0389297	0.0357863	0.0524028	0.0365122	0.0197888	0.0465444	0.0471191	0.0479794	0.053348	0.0302001
0.1	0.2382	0.34655	0.419083	0.47035	0.442967	0.370083	0.228233	0.2324	0.253733	0.243017	0.295617	0.343283		0.0238923	0.0370865	0.0606798	0.0396217	0.0433204	0.0456799	0.0296552	0.0331911	0.0415028	0.0221811	0.059893	0.0321867
0.133333	0.2788	0.4619	0.586383	0.6268	0.578083	0.4585	0.269167	0.278433	0.305767	0.3186	0.3715	0.482983		0.0458063	0.0322513	0.0742021	0.0507719	0.0439473	0.055542	0.0305182	0.0476949	0.0421257	0.0319456	0.0815673	0.0170782
0.166667	0.35255	0.634767	0.760117	0.770183	0.6929	0.535633	0.312333	0.3241	0.357583	0.38335	0.4589	0.608317		0.0429118	0.0407878	0.107408	0.0503921	0.0613044	0.0521358	0.0285957	0.0718666	0.036059	0.0562013	0.081083	0.0321932
0.2	0.397117	0.8015	0.9438	0.9329	0.844	0.627967	0.34315	0.3834	0.432233	0.47565	0.57745	0.767167		0.0603479	0.0381786	0.0912285	0.0816066	0.0519315	0.0621519	0.0360949	0.0632688	0.0544551	0.0362914	0.0803012	0.0328255
0.233333	0.45325	0.977567	1.09808	1.0692	0.9467	0.690233	0.37815	0.437667	0.5204	0.5661	0.6924	0.92805		0.043703	0.0306101	0.102625	0.0581903	0.0385127	0.0570994	0.0481915	0.0629001	0.0631843	0.0392819	0.0917022	0.0547001
0.266667	0.52565	1.14853	1.2738	1.21507	1.06215	0.774467	0.4471	0.49235	0.6011	0.675083	0.8307	1.06222		0.0612751	0.0371935	0.130714	0.106063	0.0536447	0.102006	0.0648776	0.0959634	0.0936969	0.0615773	0.124708	0.0722733
0.3	0.616817	1.33515	1.44243	1.34372	1.17968	0.832433	0.5228	0.612617	0.72235	0.7836	0.980267	1.24603		0.0581206	0.0319653	0.108934	0.0743442	0.0640356	0.0773977	0.0422565	0.101281	0.0867073	0.0526776	0.100088	0.0817041
0.333333	0.691983	1.49537	1.58597	1.47595	1.24075	0.891017	0.592133	0.695517	0.813217	0.897417	1.0914	1.40205		0.0655269	0.0265348	0.123102	0.0898564	0.068497	0.0694555	0.0518348	0.114658	0.0966254	0.0576313	0.0993644	0.0678055
0.366667	0.772283	1.6238	1.6965	1.5728	1.32975	0.932433	0.647133	0.772233	0.9006	1.00743	1.2264	1.52853		0.0673583	0.0460967	0.138439	0.0907813	0.0946866	0.092054	0.0715012	0.144999	0.0851148	0.0734359	0.141471	0.0780554
0.4	0.840083	1.73892	1.80787	1.65543	1.41617	0.97175	0.7159	0.84945	1.01038	1.09385	1.34142	1.66758		0.0541119	0.0567129	0.158733	0.0775655	0.115829	0.12406	0.0627894	0.136586	0.104515	0.0697538	0.126626	0.119342
0.433333	0.920133	1.9084	1.94195	1.75172	1.51805	1.0491	0.786217	0.93335	1.10653	1.21485	1.46145	1.78175		0.0593734	0.0530475	0.14511	0.0852179	0.0781192	0.0883036	0.0604443	0.158813	0.103152	0.0759362	0.146044	0.135291
0.466667	0.997383	1.9849	2.04853	1.8578	1.57658	1.06138	0.841233	1.01368	1.19113	1.31118	1.55808	1.8906		0.037816	0.0209712	0.140707	0.0844676	0.0787722	0.0732604	0.0505404	0.133231	0.0978344	0.0569009	0.112987	0.0957476
0.5	1.0534	2.1105	2.12387	1.92015	1.64758	1.12467	0.918633	1.09533	1.27268	1.38885	1.65687	2.00667		0.0528771	0.0672368	0.139531	0.0885816	0.100781	0.0751478	0.0836893	0.140758	0.135605	0.0897447	0.136468	0.126691
0.533333	1.11598	2.2159	2.2269	2.00533	1.71757	1.15157	0.971233	1.1585	1.35523	1.47515	1.74918	2.12005		0.0615407	0.0663933	0.158157	0.080026	0.123282	0.0988501	0.0935017	0.191803	0.148334	0.0892225	0.14169	0.119969
0.566667	1.17523	2.30953	2.29143	2.08207	1.76888	1.1979	1.03712	1.22957	1.4194	1.56067	1.80955	2.19318		0.046872	0.0338391	0.177979	0.0802542	0.113351	0.0578163	0.0937744	0.179803	0.127091	0.0684228	0.118219	0.173525
0.6	1.253	2.35435	2.36987	2.11852	1.78937	1.20723	1.08833	1.30023	1.49287	1.64753	1.90453	2.24812		0.0528938	0.0595009	0.123	0.0610167	0.110113	0.0865924	0.0742742	0.166809	0.134222	0.0695264	0.142639	0.145704
0.633333	1.28825	2.45287	2.4461	2.18877	1.84645	1.26043	1.12707	1.34128	1.5541	1.6923	1.99273	2.34093		0.0569879	0.0610666	0.158681	0.103089	0.102858	0.0772451	0.0711857	0.193033	0.120924	0.0828213	0.154719	0.148928
0.666667	1.33192	2.53023	2.50313	2.2386	1.90162	1.2805	1.20102	1.415	1.61193	1.76933	2.0441	2.41153		0.062834	0.0773644	0.169165	0.0933381	0.092563	0.0755021	0.0576346	0.188486	0.144918	0.0862915	0.156251	0.154893
0.7	1.39667	2.5852	2.56558	2.29017	1.93613	1.30745	1.23552	1.47135	1.70287	1.82145	2.14075	2.50787		0.058988	0.0778512	0.160614	0.0999497	0.0959056	0.0868415	0.0918631	0.19257	0.141555	0.068425	0.173684	0.161253
0.733333	1.4361	2.64902	2.62435	2.32803	1.96497	1.31337	1.28033	1.4964	1.73587	1.89815	2.16592	2.54787		0.0512228	0.0631297	0.154952	0.119056	0.111989	0.106505	0.0736294	0.201468	0.125012	0.0495132	0.138537	0.162899
0.766667	1.47713	2.7036	2.6797	2.37932	2.00547	1.3342	1.3133	1.57303	1.79483	1.95815	2.22433	2.6113		0.0444528	0.02321	0.143732	0.103699	0.1267	0.0763962	0.0839661	0.19355	0.134283	0.0650186	0.138486	0.178996
0.8	1.52213	2.78318	2.73042	2.41827	2.03882	1.36745	1.35278	1.60103	1.83932	2.00167	2.28985	2.65502		0.0890512	0.0587995	0.140084	0.0927117	0.10359	0.0830063	0.0917956	0.223993	0.146724	0.0936497	0.169128	0.167274
0.833333	1.57482	2.81993	2.7759	2.47313	2.09168	1.37662	1.41063	1.64433	1.91713	2.0593	2.34742	2.71567		0.0487584	0.0731111	0.141311	0.0975508	0.127628	0.0816414	0.0656372	0.187927	0.149385	0.0842133	0.140159	0.166252
0.866667	1.60713	2.88362	2.81435	2.49482	2.08917	1.4053	1.45022	1.7162	1.91685	2.0985	2.3973	2.75128		0.0554083	0.0424515	0.160638	0.0972001	0.127784	0.0947915	0.0953223	0.215529	0.157483	0.0830422	0.146836	0.184836
0.9	1.64322	2.90785	2.85273	2.53487	2.13238	1.4154	1.4635	1.73123	1.97737	2.13462	2.42623	2.80582		0.0667056	0.0551788	0.148749	0.105616	0.134747	0.0966444	0.0858098	0.200335	0.170102	0.0743541	0.157599	0.191288
0.933333	1.66042	2.96638	2.88058	2.5584	2.12917	1.43255	1.49713	1.77282	2.01337	2.17898	2.47748	2.844		0.0787255	0.0710358	0.200881	0.0895554	0.114814	0.106463	0.0997072	0.246937	0.178232	0.0955578	0.186275	0.164485
0.966667	1.72748	3.02403	2.94315	2.61995	2.20277	1.46157	1.55652	1.8172	2.07567	2.22982	2.54518	2.9051		0.0350215	0.0478999	0.152476	0.104476	0.137357	0.135261	0.0686171	0.236611	0.12703	0.0629375	0.16784	0.175487
1	1.75133	3.04272	2.98167	2.62932	2.18665	1.4684	1.57062	1.85927	2.10805	2.2667	2.54832	2.93045		0.0738478	0.0806228	0.17529	0.123425	0.116571	0.0997662	0.0914122	0.250866	0.177444	0.102164	0.138826	0.177739
1.03333	1.76792	3.07922	3.03547	2.6487	2.24083	1.47268	1.59825	1.90093	2.16615	2.30423	2.63032	2.9531		0.0964069	0.0848358	0.179335	0.1054	0.135704	0.121045	0.113306	0.2696	0.165942	0.129646	0.188034	0.216567
1.06667	1.80207	3.1227	3.07022	2.6794	2.2553	1.49058	1.63855	1.91965	2.18492	2.32328	2.6251	3.0273		0.0706272	0.0722238	0.15111	0.112803	0.101666	0.101476	0.0928767	0.241388	0.160262	0.101115	0.185416	0.202157
1.1	1.84798	3.17492	3.09477	2.73017	2.28395	1.5216	1.6676	1.97217	2.20653	2.37153	2.67953	3.01292		0.0696494	0.0802435	0.135749	0.0803575	0.126559	0.0930258	0.0789838	0.225412	0.160385	0.0996639	0.176037	0.187849
1.13333	1.86742	3.21105	3.12287	2.734	2.28855	1.52717	1.68875	1.99048	2.26285	2.41912	2.7123	3.0582		0.0713539	0.0870717	0.155132	0.127825	0.115682	0.133133	0.0854187	0.23942	0.160919	0.095842	0.156643	0.195776
1.16667	1.90567	3.2507	3.15902	2.79082	2.35522	1.53922	1.71785	2.02837	2.28602	2.44945	2.73913	3.10853		0.0567895	0.102968	0.164317	0.103621	0.149266	0.0964037	0.0572878	0.240343	0.178722	0.0970281	0.171505	0.212834
1.2	1.91343	3.27298	3.18405	2.8192	2.33375	1.55102	1.73732	2.05317	2.32112	2.47302	2.76823	3.10505		0.0267286	0.0976136	0.142129	0.120456	0.101353	0.112145	0.0967112	0.225597	0.15138	0.0531302	0.177182	0.18447
1.23333	1.95217	3.28988	3.19903	2.83045	2.3711	1.56463	1.76222	2.06745	2.34847	2.49937	2.81572	3.16113		0.0547078	0.0500871	0.154501	0.104202	0.135213	0.118285	0.0897802	0.257026	0.153171	0.0817582	0.183534	0.218067
1.26667	1.97687	3.32627	3.22887	2.84813	2.39213	1.56842	1.7772	2.09268	2.37902	2.54892	2.8233	3.18892		0.062775	0.0765996	0.15706	0.131995	0.130863	0.127326	0.101451	0.266787	0.18566	0.0935132	0.192775	0.19943
1.3	1.99248	3.3669	3.28183	2.87838	2.4036	1.61123	1.80198	2.11615	2.39178	2.57995	2.89258	3.21852		0.0695297	0.0738458	0.171738	0.108839	0.132231	0.127408	0.0940715	0.262664	0.155781	0.0694052	0.176341	0.201633
1.33333	2.02728	3.38375	3.3104	2.90998	2.42547	1.6141	1.83587	2.16915	2.45357	2.58628	2.90533	3.21138		0.0709812	0.0747868	0.163196	0.112057	0.105855	0.112442	0.0891545	0.285768	0.195106	0.085005	0.168824	0.209346
1.36667	2.03145	3.429	3.30938	2.91415	2.44665	1.6258	1.84115	2.19813	2.47517	2.62113	2.90748	3.26785		0.0644268	0.0583402	0.161129	0.095171	0.123601	0.0858184	0.0782587	0.256127	0.170755	0.121158	0.163208	0.226258
1.4	2.05862	3.43072	3.31943	2.92585	2.46535	1.61125	1.8661	2.18608	2.45845	2.63397	2.91127	3.27755		0.0444812	0.104467	0.184796	0.119303	0.119454	0.127835	0.0916198	0.266164	0.190654	0.0813458	0.186398	0.198934
1.43333	2.06877	3.49612	3.36253	2.94383	2.48565	1.6619	1.9156	2.2227	2.5231	2.66433	2.96123	3.31712		0.0443233	0.07275	0.152662	0.0907802	0.120695	0.107043	0.0899823	0.228521	0.192921	0.101002	0.183174	0.202325
1.46667	2.09975	3.49067	3.36942	2.96142	2.50297	1.6423	1.93665	2.26607	2.53073	2.69008	2.99448	3.29958		0.0778276	0.0689224	0.169114	0.110229	0.133864	0.115454	0.109645	0.244631	0.189111	0.0929982	0.172631	0.222262
1.5	2.10893	3.5229	3.415	3.00047	2.50745	1.64608	1.94583	2.2573	2.56567	2.71617	3.00308	3.36517		0.0733662	0.0900385	0.197788	0.125878	0.13365	0.131335	0.104443	0.265924	0.19454	0.122906	0.193674	0.20726
1.53333	2.14252	3.54532	3.41028	3.0365	2.52672	1.68385	1.97128	2.30927	2.5752	2.75423	3.04488	3.39158		0.0829954	0.0808785	0.196309	0.116226	0.137914	0.135627	0.0916692	0.30031	0.178551	0.127583	0.18313	0.247416
1.56667	2.12747	3.553	3.45238	3.04855	2.54235	1.69727	1.98473	2.30388	2.62428	2.76328	3.057	3.37612		0.0640978	0.0884693	0.16556	0.109191	0.109211	0.113915	0.11332	0.278555	0.206994	0.0937175	0.210742	0.220534
1.6	2.15793	3.60872	3.47178	3.0559	2.55722	1.67827	1.9971	2.33595	2.6165	2.79228	3.07855	3.39033		0.0542125	0.0876129	0.154585	0.104812	0.142551	0.122525	0.0813668	0.261568	0.179636	0.0895641	0.174377	0.184507
1.63333	2.20012	3.62808	3.48277	3.09692	2.56287	1.71313	2.02872	2.3485	2.66823	2.81547	3.10285	3.4312		0.0664261	0.0503666	0.210019	0.124796	0.142115	0.125051	0.104385	0.284548	0.176256	0.11554	0.201881	0.228655
1.66667	2.20055	3.62818	3.48872	3.09605	2.57478	1.72947	2.03735	2.3677	2.66368	2.83123	3.12133	3.44473		0.0728562	0.0783397	0.217798	0.0994369	0.107174	0.112463	0.109542	0.290582	0.214101	0.115952	0.238823	0.247096
1.7	2.24917	3.65228	3.51965	3.1235	2.62355	1.73432	2.05682	2.39652	2.69188	2.8259	3.14558	3.47412		0.0899278	0.0700243	0.181234	0.12066	0.111636	0.116773	0.107133	0.296374	0.21453	0.0905396	0.180001	0.244072
1.73333	2.25793	3.67815	3.54843	3.12912	2.63295	1.75657	2.06273	2.41502	2.70493	2.8611	3.17243	3.48252		0.0632353	0.1001	0.163941	0.107167	0.130228	0.129266	0.0935744	0.277325	0.202944	0.104082	0.207405	0.228286
1.76667	2.25382	3.69107	3.56923	3.12243	2.63222	1.74165	2.07785	2.40908	2.72263	2.88093	3.1633	3.51075		0.0604139	0.104871	0.173304	0.123131	0.137244	0.12934	0.0851896	0.274661	0.187389	0.0677665	0.17255	0.229413
1.8	2.27223	3.72348	3.57438	3.17192	2.63592	1.75837	2.08302	2.43738	2.75135	2.89045	3.19397	3.51297		0.0370124	0.0700959	0.147816	0.0938514	0.146323	0.133073	0.0736085	0.275981	0.163067	0.102859	0.165355	0.228812
1.83333	2.31052	3.73212	3.61307	3.18538	2.66297	1.7921	2.14668	2.46942	2.77127	2.93387	3.25017	3.55192		0.0728484	0.106318	0.181756	0.128543	0.123886	0.131794	0.110651	0.287745	0.20314	0.100556	0.194504	0.220398
1.86667	2.30693	3.75662	3.63222	3.1985	2.71775	1.78055	2.14353	2.5052	2.78492	2.97668	3.24863	3.54593		0.0444567	0.0677693	0.186146	0.121652	0.154365	0.151661	0.0837682	0.280372	0.209282	0.114623	0.18624	0.207786
1.9	2.33048	3.77743	3.613	3.19872	2.68558	1.79083	2.14462	2.50395	2.80447	2.96258	3.26917	3.5681		0.0543684	0.0801167	0.180765	0.130171	0.109828	0.157205	0.109931	0.303587	0.188162	0.115288	0.218967	0.218407
1.93333	2.32215	3.80112	3.62718	3.23057	2.70712	1.8001	2.17275	2.50658	2.81248	2.97058	3.28177	3.59645		0.0608758	0.09632	0.170831	0.111718	0.126258	0.126945	0.0845367	0.29555	0.198781	0.0842048	0.18396	0.220779
1.96667	2.369	3.80722	3.68237	3.22295	2.7453	1.81415	2.1785	2.5216	2.85783	3.01155	3.281	3.56448		0.0780602	0.118046	0.154283	0.13452	0.13939	0.148193	0.0888426	0.316616	0.203444	0.111312	0.211306	0.208849
2	2.36027	3.82082	3.67797	3.25623	2.72225	1.80923	2.1764	2.557	2.85877	3.01088	3.30112	3.6073		0.0534666	0.0796525	0.160208	0.102867	0.128726	0.137552	0.105241	0.297147	0.184181	0.0917179	0.228071	0.244461
2.03333	2.39085	3.83043	3.69163	3.28052	2.72868	1.8196	2.20518	2.57073	2.87577	3.01832	3.305	3.6082		0.0678402	0.099689	0.195724	0.115452	0.112755	0.127344	0.110811	0.294811	0.181645	0.0954484	0.222762	0.250527
2.06667	2.39865	3.85825	3.68015	3.28575	2.75112	1.82675	2.2259	2.58375	2.88437	3.05673	3.32938	3.62197		0.058585	0.110593	0.122083	0.120671	0.151681	0.157801	0.101037	0.293251	0.176977	0.0623912	0.18953	0.195058
2.1	2.41658	3.87403	3.7203	3.2832	2.7684	1.8433	2.2486	2.59598	2.9201	3.04007	3.34453	3.61418		0.0577635	0.0831065	0.162024	0.120171	0.159641	0.115159	0.108265	0.321599	0.206402	0.108704	0.203843	0.22799
2.13333	2.39482	3.87112	3.70462	3.28833	2.75433	1.85393	2.21623	2.5881	2.88737	3.04902	3.3684	3.65227		0.0688735	0.0985827	0.215965	0.135274	0.158393	0.147522	0.108887	0.315009	0.219524	0.108289	0.229484	0.242872
2.16667	2.42827	3.86078	3.73812	3.32662	2.77582	1.84962	2.23103	2.62227	2.91447	3.10348	3.3676	3.66568		0.0505502	0.0816488	0.158236	0.119743	0.141937	0.16026	0.106536	0.301939	0.208999	0.106358	0.188786	0.253883
2.2	2.40868	3.89617	3.74728	3.302	2.7783	1.85358	2.25657	2.60547	2.93617	3.09707	3.35892	3.65642		0.0596153	0.0902198	0.181928	0.116792	0.146154	0.12612	0.106675	0.309461	0.194383	0.0931233	0.208997	0.247127
2.23333	2.43595	3.9029	3.76105	3.3156	2.80535	1.87268	2.28403	2.62757	2.95808	3.08583	3.41042	3.68867		0.0585385	0.11173	0.166856	0.0938447	0.149869	0.127314	0.135621	0.323327	0.229393	0.11494	0.221002	0.246332
2.26667	2.45075	3.93943	3.78245	3.34973	2.8185	1.89033	2.27662	2.63557	2.96992	3.13468	3.405	3.69168		0.0454567	0.113186	0.167187	0.114716	0.132197	0.144653	0.106399	0.310831	0.194371	0.0919531	0.222947	0.233268
