# Supplementary material for: Early steps of protein disaggregation by Hsp70 chaperone and class B J-domain proteins are shaped by Hsp110
Source: eLife. 2024 Oct 15;13:RP94795. doi: 10.7554/eLife.94795 (PMC11479587; doi:10.7554/eLife.94795)
Supplement: Figure 3—source data 7. [file elife-94795-fig3-data7.xlsx]

## Sheet: Fig. 3E - right panel
Sse1 (µM)	Ssa1, Sis1, Sse1 WT			Ssa1, Sis1, Sse1-2
	Mean	SD	N	Mean	SD	N
0	2.36027	0.053467	3	2.1764	0.105241	3
0.1	3.82082	0.079653	3	2.557	0.297147	3
0.25	3.67797	0.160208	3	2.85877	0.184181	3
0.5	3.25623	0.102867	3	3.01088	0.091718	3
1	2.72225	0.128726	3	3.30112	0.228071	3
2	1.80923	0.137552	3	3.6073	0.244461	3
	Model fitting:
	Sse1 (µM)	Ssa1, Sis1, Sse1 WT					Sse1 (µM)	Ssa1, Sis1, Sse1 WT					Sse1 (µM)	Ssa1, Sis1, Sse1-2
		Mean	SD	N				Mean	SD	N				Mean	SD	N
	0.1	3.82082	0.079653	3			0	2.36027	0.053467	3			0	2.1764	0.105241	3
	0.25	3.67797	0.160208	3			0.1	3.82082	0.079653	3			0.1	2.557	0.297147	3
	0.5	3.25623	0.102867	3									0.25	2.85877	0.184181	3
	1	2.72225	0.128726	3									0.5	3.01088	0.091718	3
	2	1.80923	0.137552	3									1	3.30112	0.228071	3
													2	3.6073	0.244461	3
GraphPrism Model	Agonist vs. response -- Variable slope (3 parameters) [2]
Equation	Y=Bottom + (X^Hillslope)*(Top-Bottom)/(X^HillSlope + EC50^HillSlope)
		HillSlope	1
		Best-fit values
		Bottom	3.996					2.212						2.36
		Top	-3.364					3.861						~ 4,176
		logEC50	0.6752					-0.3468						~ -1,614
		EC50	4.734					0.4499						~ 0,02431
		Span	-7.36					1.648						~ 1,816
		Std. Error
		Bottom	0.07748					0.1026						0.04522
		Top	2.786					0.2102						~ 0,03434
		logEC50	0.2358					0.1809						~ 0,02807
		Span	2.731					0.2022						~ 0,06181
		95% Confidence Intervals
		Bottom	3,827 to 4,165					1,994 to 2,431						2,216 to 2,504
		Top	-9,435 to 2,707					3,413 to 4,309						(Very wide)
		logEC50	0,1613 to 1,189					-0,7324 to 0,03874						(Very wide)
		EC50	1,450 to 15,46					0,1852 to 1,093						(Very wide)
		Span	-13,31 to -1,408					1,218 to 2,079						(Very wide)
		Goodness of Fit
		Degrees of Freedom	12					15						3
		R square	0.9793					0.8752						0.9943
		Absolute Sum of Squares	0.1699					0.5554						0.01841
		Sy.x	0.119					0.1924						0.07833
