# Supplementary material for: Early steps of protein disaggregation by Hsp70 chaperone and class B J-domain proteins are shaped by Hsp110
Source: eLife. 2024 Oct 15;13:RP94795. doi: 10.7554/eLife.94795 (PMC11479587; doi:10.7554/eLife.94795)
Supplement: Figure 4—figure supplement 1—source data 1. [file elife-94795-fig4-figsupp1-data1.xlsx]

## Sheet: Figure 4—figure supplement 1A
Time (min)	1uM Ssa1			1uM Ssa1 1uM 1-2			1uM Ssa1 2uM Sse1-2			1uM Ssa1 4uM Sse1-2
0	0	0	0	0	0	0	0	0	0	0	0	0
0.00333333	-0.0005455	-0.003	-0.001	-0.00079536	0.0022	-0.0009	-0.00147057	-0.001	0.0033	-0.0031271	0.0011	-0.0002
0.00666667	0.00098419	-0.004	-0.0021	-0.00183677	0.0006	-0.0003	0.002738	-0.0006	0.0024	-0.00170708	0.0032	-0.0013
0.01	0.00307846	-0.0038	-0.0031	-0.00371837	0.0001	-0.0006	0.00048637	-0.0005	0.0034	-0.00330544	0.0032	-0.0024
0.0133333	7.63e-06	-0.0058	-0.0034	0.00078869	0	-0.0013	0.00187588	-0.0022	0.0024	-0.00844098	0.0003	-0.003
0.0166667	-0.00375461	-0.0067	-0.0027	-0.00508117	-0.0005	-0.0012	-0.00477505	-0.0023	0.0008	-0.00545121	0.0009	-0.0039
0.02	-0.00433635	-0.0026	-0.0026	3.72e-05	-0.0013	-0.0013	-0.00352383	-0.0019	-0.001	-0.00096226	-0.0018	-0.0051
0.0233333	-0.00615406	-0.0056	-0.0024	-0.0019207	-0.0017	-0.0012	-0.00585079	-0.0015	-0.0004	-0.00476361	-0.004	-0.0034
0.0266667	0.00345135	-0.0066	-0.0012	-0.00368309	-0.002	-0.0026	0.00048923	-0.0004	0.0004	-0.0108328	-0.0044	-0.0041
0.03	-0.004179	-0.0028	-0.0006	-0.0037775	-0.001	-0.0022	-0.00221348	-0.0007	0.0009	-0.00418568	-0.0041	-0.0031
0.0333333	-0.0024414	-0.0003	-0.0015	-0.00669384	0.0012	-0.0028	-0.00196934	-0.0014	0.0025	-0.0044632	-0.0069	-0.0028
0.0366667	-4.196e-05	-0.005	-0.0009	-0.00387573	0.0005	-0.0031	-0.00280857	-0.0005	0.004	-0.00346756	-0.0065	-0.0015
0.04	0.00072766	-0.0034	-0.0018	-0.00292492	0.0003	-0.0044	-0.00744343	-0.0023	0.001	-0.00981999	-0.0038	-0.0031
0.0433333	-0.00422382	-0.0029	-0.002	-0.00672054	0.0021	-0.004	-0.00376415	-0.0034	0.0016	-0.00423623	-0.0045	-0.0019
0.0466667	-0.00334358	-0.0061	-0.0014	-0.00595951	0.0001	-0.0043	0.00016212	-0.0033	0.0005	-0.00973797	-0.0058	-0.0016
0.05	-0.00691891	-0.0088	-0.0006	-0.00330829	-0.0019	-0.0039	-0.00740242	-0.0041	-0.0012	-0.00902653	-0.0045	-0.0025
0.0533333	-0.00493049	-0.0071	-0.0023	-0.0113277	-0.0024	-0.0045	-0.0070343	-0.0046	-0.0026	-0.0105553	-0.0027	-0.0027
0.0566667	-0.00633716	-0.0064	-0.0021	-0.00248527	-0.0024	-0.0046	-0.00769043	-0.0041	-0.0007	-0.0144119	-0.0039	-0.0031
0.06	-0.00452137	-0.0045	-0.0018	-0.00667476	-0.005	-0.0035	-0.00914764	-0.0034	-0.0017	-0.011158	-0.0039	-0.005
0.0633333	-0.00817871	-0.0037	-0.0023	-0.0107775	-0.0036	-0.0032	-0.00235844	-0.0046	-0.0021	-0.0077982	-0.0016	-0.0053
0.0666667	-0.00736618	-0.0026	-0.0027	-0.00900841	-0.0027	-0.0029	-0.00924397	-0.0032	-0.0015	-0.0113373	-0.0013	-0.0057
0.07	-0.00740909	-0.0045	-0.0014	-0.00802612	-0.0028	-0.0024	-0.0113926	-0.0048	0.0006	-0.0144672	-0.0017	-0.0068
0.0733333	-0.01367	-0.0067	-0.001	-0.0114517	-0.0026	-0.0034	-0.00823307	-0.0038	-0.0021	-0.0137129	-0.0048	-0.008
0.0766667	-0.0115089	-0.009	-0.0042	-0.00917434	-0.0022	-0.0039	-0.0119448	-0.0057	-0.0041	-0.0106478	-0.0057	-0.0076
0.08	-0.0108795	-0.0103	-0.0051	-0.0122547	-0.0043	-0.0048	-0.0079813	-0.0031	-0.0038	-0.0152626	-0.0053	-0.0099
0.0833333	-0.0117454	-0.0122	-0.0052	-0.00895977	-0.0055	-0.005	-0.00919628	-0.0055	-0.0055	-0.0142565	-0.0052	-0.0095
0.0866667	-0.00768184	-0.0111	-0.007	-0.00937175	-0.0051	-0.0041	-0.00787067	-0.0047	-0.0065	-0.0091734	-0.0055	-0.0081
0.09	-0.0113878	-0.0098	-0.0063	-0.0116787	-0.0057	-0.0025	-0.010581	-0.0054	-0.0054	-0.0141306	-0.0016	-0.0068
0.0933333	-0.00966072	-0.0084	-0.0055	-0.0144367	-0.0055	-0.0012	-0.0119181	-0.0045	-0.0049	-0.0155535	-0.0005	-0.0075
0.0966667	-0.0134878	-0.0066	-0.0071	-0.00997925	-0.005	0.0001	-0.0120411	-0.0058	-0.0066	-0.0109806	-0.0015	-0.0065
0.1	-0.00989914	-0.007	-0.0068	-0.0127745	-0.0054	-0.0007	-0.0114994	-0.0053	-0.0049	-0.0157976	-0.0001	-0.0069
0.103333	-0.0129604	-0.0064	-0.0057	-0.0157471	-0.0059	-0.0016	-0.0133143	-0.005	-0.0046	-0.011487	0.0013	-0.0076
0.106667	-0.0156927	-0.0049	-0.0072	-0.0113506	-0.0047	-0.0024	-0.0127411	-0.0051	-0.0023	-0.0139637	-0.0017	-0.0082
0.11	-0.018239	-0.0083	-0.007	-0.0132856	-0.0052	-0.004	-0.0101929	-0.005	-0.0034	-0.0172319	-0.0021	-0.0069
0.113333	-0.0142889	-0.0112	-0.0057	-0.0133295	-0.0071	-0.004	-0.0131569	-0.0062	-0.0005	-0.0171003	-0.0025	-0.0065
0.116667	-0.0158472	-0.0127	-0.0066	-0.0171413	-0.0052	-0.0036	-0.0160923	-0.0069	-0.0008	-0.0195456	-0.0053	-0.0062
0.12	-0.00859737	-0.0159	-0.0082	-0.0156746	-0.005	-0.0036	-0.0204697	-0.0072	-0.0015	-0.017374	-0.0068	-0.0067
0.123333	-0.0140905	-0.0166	-0.0084	-0.0172787	-0.0062	-0.0038	-0.0167427	-0.0091	-0.0041	-0.0134401	-0.0035	-0.0062
0.126667	-0.0150051	-0.0152	-0.009	-0.0180569	-0.0079	-0.0033	-0.0116663	-0.0086	-0.0025	-0.0174179	-0.0045	-0.0067
0.13	-0.0162268	-0.0152	-0.0089	-0.0153494	-0.0063	-0.0049	-0.0166521	-0.0091	-0.005	-0.0185928	-0.0036	-0.0084
0.133333	-0.0167351	-0.0136	-0.0086	-0.0176334	-0.0066	-0.0052	-0.0161123	-0.0071	-0.0047	-0.017354	-0.0036	-0.0095
0.136667	-0.0172758	-0.0121	-0.0073	-0.019083	-0.009	-0.0057	-0.0193481	-0.0086	-0.0037	-0.0193949	-0.0051	-0.0094
0.14	-0.0196485	-0.0136	-0.0066	-0.0219507	-0.0083	-0.0039	-0.017354	-0.0089	-0.003	-0.018857	-0.0081	-0.0092
0.143333	-0.0183973	-0.0133	-0.005	-0.0224733	-0.0073	-0.0066	-0.0204172	-0.01	-0.0053	-0.0172873	-0.0056	-0.0092
0.146667	-0.0170546	-0.0107	-0.0068	-0.0210428	-0.0073	-0.0087	-0.0170708	-0.0092	-0.0078	-0.0172653	-0.0057	-0.0075
0.15	-0.0206251	-0.0092	-0.008	-0.0167437	-0.0084	-0.0081	-0.0251923	-0.0119	-0.0071	-0.0206423	-0.0064	-0.0086
0.153333	-0.0210972	-0.0088	-0.008	-0.01861	-0.0075	-0.0092	-0.0188589	-0.0105	-0.0081	-0.0228777	-0.0056	-0.0093
0.156667	-0.0180588	-0.0093	-0.0102	-0.0178185	-0.01	-0.0108	-0.0173445	-0.0077	-0.0078	-0.0234528	-0.0079	-0.011
0.16	-0.0227966	-0.0101	-0.01	-0.0191545	-0.0091	-0.0092	-0.016902	-0.0086	-0.0059	-0.0247507	-0.0107	-0.013
0.163333	-0.0184631	-0.012	-0.0087	-0.0282803	-0.0088	-0.0073	-0.0171623	-0.0106	-0.0035	-0.0254498	-0.0106	-0.0137
0.166667	-0.02038	-0.0133	-0.0077	-0.0201292	-0.0091	-0.0087	-0.0220518	-0.0103	-0.0052	-0.0241499	-0.0073	-0.0116
0.17	-0.0220213	-0.0137	-0.0098	-0.0209599	-0.0079	-0.0076	-0.0225048	-0.0117	-0.0056	-0.020709	-0.0086	-0.013
0.173333	-0.017108	-0.012	-0.0074	-0.0203571	-0.005	-0.0084	-0.0210943	-0.0119	-0.0086	-0.0216103	-0.0075	-0.0141
0.176667	-0.017436	-0.0106	-0.0094	-0.0221586	-0.0059	-0.008	-0.0175896	-0.0113	-0.0086	-0.0239992	-0.0089	-0.0142
0.18	-0.0250549	-0.0093	-0.0087	-0.026556	-0.006	-0.0082	-0.0209684	-0.0096	-0.0079	-0.019887	-0.0102	-0.0152
0.183333	-0.0230379	-0.0116	-0.0101	-0.0211687	-0.0047	-0.0078	-0.0172682	-0.009	-0.008	-0.0237913	-0.0112	-0.0143
0.186667	-0.0233183	-0.0113	-0.0101	-0.0169277	-0.0077	-0.0087	-0.0237474	-0.0095	-0.0078	-0.0227985	-0.0094	-0.0134
0.19	-0.0279035	-0.0117	-0.0119	-0.0175009	-0.0095	-0.0083	-0.0193605	-0.011	-0.0049	-0.0263224	-0.0075	-0.0117
0.193333	-0.0215807	-0.0119	-0.011	-0.0226631	-0.0083	-0.009	-0.0259123	-0.0115	-0.0055	-0.0250235	-0.0064	-0.012
0.196667	-0.0228329	-0.0151	-0.0131	-0.0232849	-0.008	-0.0091	-0.0260878	-0.0121	-0.0061	-0.0250359	-0.0064	-0.0126
0.2	-0.021863	-0.0144	-0.0129	-0.0264788	-0.0098	-0.0092	-0.0246887	-0.0118	-0.0071	-0.0227423	-0.0084	-0.0156
0.203333	-0.0276089	-0.0151	-0.0126	-0.0294132	-0.0094	-0.0099	-0.0284596	-0.0118	-0.0064	-0.0262442	-0.0101	-0.0156
0.206667	-0.0254211	-0.0168	-0.0131	-0.0260811	-0.009	-0.013	-0.0267849	-0.0105	-0.008	-0.0232735	-0.0116	-0.0164
0.21	-0.0264769	-0.0168	-0.0141	-0.0254831	-0.0098	-0.014	-0.0247555	-0.01	-0.0076	-0.0291319	-0.011	-0.0151
0.213333	-0.0288448	-0.0154	-0.0141	-0.0268803	-0.0108	-0.0144	-0.0339374	-0.0093	-0.0073	-0.0297241	-0.0106	-0.0151
0.216667	-0.0266266	-0.0132	-0.0142	-0.0291395	-0.0116	-0.0146	-0.0243216	-0.0103	-0.0059	-0.0285988	-0.0094	-0.0143
0.22	-0.025671	-0.0131	-0.0148	-0.0248079	-0.0103	-0.0142	-0.0272884	-0.0106	-0.0079	-0.0263643	-0.0114	-0.0153
0.223333	-0.0287924	-0.0103	-0.0139	-0.0307312	-0.0112	-0.0126	-0.0262699	-0.0113	-0.0049	-0.0316057	-0.0117	-0.0162
0.226667	-0.0288239	-0.0115	-0.0144	-0.025404	-0.0126	-0.0121	-0.029666	-0.0127	-0.005	-0.0282688	-0.0107	-0.0158
0.23	-0.0300341	-0.0112	-0.0148	-0.0317698	-0.0144	-0.012	-0.0329647	-0.0147	-0.0055	-0.032424	-0.0121	-0.0143
0.233333	-0.0297661	-0.014	-0.0155	-0.027915	-0.0143	-0.0115	-0.0291166	-0.0138	-0.0067	-0.031889	-0.0121	-0.015
0.236667	-0.0268269	-0.0159	-0.0157	-0.0256166	-0.0147	-0.0116	-0.0311365	-0.0117	-0.006	-0.0325069	-0.0101	-0.014
0.24	-0.0292864	-0.0178	-0.0176	-0.0273991	-0.0145	-0.0115	-0.0328503	-0.0122	-0.0084	-0.0327053	-0.0098	-0.015
0.243333	-0.0320683	-0.0178	-0.0165	-0.0287123	-0.0154	-0.0126	-0.0342979	-0.0112	-0.0104	-0.0371513	-0.0119	-0.0151
0.246667	-0.0284901	-0.0168	-0.0154	-0.033432	-0.0163	-0.013	-0.0323362	-0.0111	-0.0105	-0.0344725	-0.0102	-0.0164
0.25	-0.025012	-0.0165	-0.0145	-0.0321741	-0.0154	-0.0146	-0.0325394	-0.0116	-0.0119	-0.0304718	-0.0102	-0.0155
0.253333	-0.0289497	-0.016	-0.015	-0.033783	-0.0142	-0.0151	-0.0303984	-0.0124	-0.0113	-0.0361195	-0.0124	-0.0154
0.256667	-0.0342264	-0.0149	-0.0138	-0.0330706	-0.0165	-0.0143	-0.0321569	-0.0135	-0.0114	-0.0353165	-0.0129	-0.0121
0.26	-0.0321388	-0.017	-0.0147	-0.0402422	-0.0154	-0.0136	-0.0343819	-0.014	-0.0106	-0.0320024	-0.0142	-0.0129
0.263333	-0.031992	-0.018	-0.0151	-0.032279	-0.0144	-0.013	-0.0315657	-0.0133	-0.0128	-0.0328245	-0.0163	-0.0128
0.266667	-0.0322008	-0.0183	-0.0152	-0.0341844	-0.0171	-0.0117	-0.0319901	-0.0131	-0.0092	-0.0368338	-0.0163	-0.0133
0.27	-0.0277109	-0.019	-0.0147	-0.0373325	-0.0191	-0.0102	-0.0303783	-0.0145	-0.0089	-0.035634	-0.0154	-0.0136
0.273333	-0.0340652	-0.0214	-0.0148	-0.036603	-0.018	-0.0101	-0.0332251	-0.0135	-0.0102	-0.0360069	-0.0159	-0.0172
0.276667	-0.0358467	-0.0215	-0.0167	-0.0368643	-0.0192	-0.0099	-0.036912	-0.0144	-0.0107	-0.0339727	-0.015	-0.0183
0.28	-0.035532	-0.0228	-0.0173	-0.0316963	-0.0173	-0.0115	-0.035923	-0.0147	-0.0089	-0.0349445	-0.0149	-0.0189
0.283333	-0.0307865	-0.0228	-0.0162	-0.0386906	-0.0163	-0.0119	-0.0337467	-0.0146	-0.0117	-0.0392685	-0.017	-0.0181
0.286667	-0.0336523	-0.0215	-0.0161	-0.0316725	-0.0161	-0.013	-0.039279	-0.0145	-0.013	-0.0401239	-0.0172	-0.0194
0.29	-0.034975	-0.0209	-0.018	-0.0378513	-0.0167	-0.013	-0.0381556	-0.0157	-0.0127	-0.0338545	-0.0187	-0.0182
0.293333	-0.0335236	-0.019	-0.0178	-0.0377016	-0.0162	-0.013	-0.0383225	-0.015	-0.012	-0.0344915	-0.0203	-0.018
0.296667	-0.0366144	-0.0178	-0.0181	-0.040926	-0.0174	-0.0119	-0.0368176	-0.0154	-0.012	-0.0371904	-0.0225	-0.0184
0.3	-0.0377426	-0.0168	-0.0211	-0.0433292	-0.0168	-0.0129	-0.0420809	-0.0155	-0.0111	-0.0384254	-0.0212	-0.0192
0.303333	-0.0351715	-0.017	-0.0212	-0.0411253	-0.0182	-0.0131	-0.0334864	-0.0151	-0.0128	-0.0379133	-0.0196	-0.0202
0.306667	-0.0398254	-0.0168	-0.0195	-0.0393925	-0.0203	-0.0143	-0.0363483	-0.0141	-0.0129	-0.0388556	-0.0168	-0.0203
0.31	-0.0326595	-0.0164	-0.0183	-0.0410023	-0.0197	-0.0156	-0.0366612	-0.0143	-0.0136	-0.0448542	-0.0161	-0.0213
0.313333	-0.0343161	-0.0183	-0.0194	-0.0378304	-0.0216	-0.0167	-0.0361967	-0.0133	-0.0159	-0.0396595	-0.0145	-0.0217
0.316667	-0.0438862	-0.0195	-0.0179	-0.0392189	-0.024	-0.0168	-0.0386362	-0.0144	-0.016	-0.0376778	-0.0139	-0.022
0.32	-0.035923	-0.0205	-0.0178	-0.0371609	-0.0219	-0.0165	-0.0409775	-0.0149	-0.0156	-0.0424042	-0.0136	-0.0209
0.323333	-0.0349493	-0.0216	-0.0182	-0.0401001	-0.0202	-0.016	-0.038125	-0.0159	-0.0144	-0.0428267	-0.0144	-0.0216
0.326667	-0.0397148	-0.0207	-0.019	-0.0372839	-0.0197	-0.0154	-0.0437479	-0.017	-0.0133	-0.0415306	-0.0138	-0.0205
0.33	-0.0451288	-0.0204	-0.0179	-0.0406237	-0.02	-0.0144	-0.045352	-0.0179	-0.0112	-0.0413723	-0.0135	-0.0195
0.333333	-0.0392485	-0.0204	-0.0199	-0.0453796	-0.0167	-0.0145	-0.041194	-0.0181	-0.013	-0.043643	-0.0162	-0.0184
0.336667	-0.0378675	-0.0215	-0.02	-0.0392284	-0.0189	-0.0159	-0.0429373	-0.0197	-0.0126	-0.0427284	-0.0202	-0.0193
0.34	-0.040699	-0.0228	-0.0216	-0.0372677	-0.0204	-0.0172	-0.0413217	-0.0176	-0.0136	-0.0493317	-0.0202	-0.0188
0.343333	-0.0387592	-0.0252	-0.0228	-0.0488291	-0.0219	-0.0169	-0.0407343	-0.0167	-0.0136	-0.0403347	-0.0222	-0.0192
0.346667	-0.0419722	-0.0256	-0.024	-0.0414934	-0.0207	-0.0179	-0.0398226	-0.0171	-0.0143	-0.0424395	-0.0212	-0.021
0.35	-0.0427933	-0.0268	-0.0239	-0.0375957	-0.0234	-0.018	-0.0478392	-0.0168	-0.0141	-0.0468493	-0.0182	-0.0235
0.353333	-0.0373869	-0.0264	-0.0242	-0.0408554	-0.0234	-0.0181	-0.0416174	-0.0147	-0.0142	-0.0455933	-0.0145	-0.0221
0.356667	-0.0356378	-0.0252	-0.0228	-0.041832	-0.0197	-0.0181	-0.0485058	-0.0164	-0.0138	-0.0469828	-0.0168	-0.0231
0.36	-0.0449209	-0.0237	-0.0214	-0.0451221	-0.021	-0.0176	-0.0461264	-0.0163	-0.0145	-0.0442066	-0.0133	-0.0236
0.363333	-0.0407095	-0.0249	-0.0211	-0.0456772	-0.0226	-0.0176	-0.0481014	-0.0162	-0.0134	-0.0477953	-0.0131	-0.0216
0.366667	-0.0428009	-0.0247	-0.021	-0.0479412	-0.0227	-0.0173	-0.0474949	-0.0157	-0.0111	-0.0495663	-0.0179	-0.0213
0.37	-0.0411186	-0.0235	-0.0223	-0.0418596	-0.0244	-0.0163	-0.0448885	-0.0175	-0.0108	-0.0494108	-0.0189	-0.0211
0.373333	-0.0390425	-0.0248	-0.0235	-0.0485888	-0.0257	-0.0152	-0.047121	-0.0178	-0.0114	-0.048913	-0.0169	-0.0194
0.376667	-0.0470581	-0.025	-0.0253	-0.0496883	-0.0289	-0.0164	-0.0488539	-0.0203	-0.0138	-0.0480347	-0.0173	-0.0186
0.38	-0.0472946	-0.0233	-0.0258	-0.0438175	-0.03	-0.0157	-0.0484638	-0.0201	-0.0148	-0.0499487	-0.0175	-0.0192
0.383333	-0.0450172	-0.0226	-0.0258	-0.0477114	-0.0298	-0.0157	-0.0483923	-0.0214	-0.0161	-0.0425234	-0.0146	-0.0183
0.386667	-0.0443897	-0.0232	-0.0259	-0.0467815	-0.0312	-0.0165	-0.0503845	-0.021	-0.0177	-0.0504475	-0.0151	-0.0202
0.39	-0.0410175	-0.0214	-0.0268	-0.0495901	-0.0329	-0.0174	-0.046876	-0.0197	-0.0198	-0.0468626	-0.0141	-0.0211
0.393333	-0.0454426	-0.0219	-0.0246	-0.0522261	-0.0328	-0.0167	-0.046113	-0.0175	-0.0178	-0.0493898	-0.0153	-0.0205
0.396667	-0.0405474	-0.0216	-0.0245	-0.0519276	-0.0315	-0.0172	-0.0472212	-0.0189	-0.0179	-0.0475359	-0.0177	-0.0211
0.4	-0.0535183	-0.0202	-0.0242	-0.0474615	-0.0319	-0.0172	-0.054862	-0.0175	-0.0171	-0.0566282	-0.0191	-0.0232
0.403333	-0.0510073	-0.021	-0.0234	-0.0506649	-0.0323	-0.0172	-0.0503788	-0.0172	-0.017	-0.0521584	-0.02	-0.0218
0.406667	-0.0470829	-0.0229	-0.0226	-0.0527239	-0.0323	-0.0172	-0.0546274	-0.0189	-0.0134	-0.0539122	-0.0224	-0.0238
0.41	-0.0490685	-0.0245	-0.0258	-0.0508442	-0.0307	-0.0175	-0.0500879	-0.0187	-0.0133	-0.0546846	-0.0239	-0.025
0.413333	-0.0469398	-0.0261	-0.0249	-0.0498323	-0.0323	-0.0182	-0.0513496	-0.0178	-0.0133	-0.050808	-0.0235	-0.0256
0.416667	-0.0527296	-0.0269	-0.0265	-0.0515776	-0.0345	-0.0175	-0.0504045	-0.0187	-0.0143	-0.0554352	-0.0205	-0.0253
0.42	-0.0499525	-0.0268	-0.0283	-0.054842	-0.0345	-0.0182	-0.0504293	-0.0202	-0.0158	-0.0506182	-0.0191	-0.0272
0.423333	-0.0487738	-0.0249	-0.0285	-0.0482178	-0.0338	-0.0197	-0.0548315	-0.0194	-0.0172	-0.0558949	-0.0182	-0.0259
0.426667	-0.047739	-0.023	-0.0248	-0.0572271	-0.0338	-0.0205	-0.0530376	-0.0215	-0.0178	-0.0561132	-0.0171	-0.0264
0.43	-0.0497389	-0.0237	-0.0256	-0.059701	-0.0336	-0.0201	-0.0557136	-0.0204	-0.0175	-0.0529175	-0.0167	-0.0268
0.433333	-0.0483866	-0.0239	-0.0256	-0.0546379	-0.0329	-0.0213	-0.0592241	-0.0204	-0.0184	-0.0547838	-0.0182	-0.0256
0.436667	-0.0485449	-0.0221	-0.0253	-0.0528469	-0.031	-0.0198	-0.0523195	-0.0202	-0.0164	-0.0532894	-0.0211	-0.0242
0.44	-0.0494309	-0.0245	-0.0254	-0.0540972	-0.0331	-0.0189	-0.0561228	-0.0211	-0.0155	-0.0611458	-0.0225	-0.0254
0.443333	-0.0542383	-0.0262	-0.0283	-0.0521727	-0.0354	-0.0199	-0.0544672	-0.0199	-0.0156	-0.0589209	-0.0243	-0.0257
0.446667	-0.0520973	-0.023	-0.0289	-0.0593691	-0.0352	-0.0194	-0.0577412	-0.0207	-0.0167	-0.0579147	-0.0251	-0.0262
0.45	-0.0537367	-0.023	-0.0277	-0.0580988	-0.035	-0.019	-0.0587616	-0.0222	-0.0172	-0.059269	-0.0269	-0.0269
0.453333	-0.0561104	-0.025	-0.0292	-0.057292	-0.0362	-0.0195	-0.0574722	-0.0215	-0.0167	-0.0609932	-0.0234	-0.0282
0.456667	-0.0535994	-0.0237	-0.0288	-0.0565844	-0.0377	-0.0187	-0.0567007	-0.022	-0.0205	-0.0582323	-0.0223	-0.0273
0.46	-0.0523415	-0.0236	-0.0302	-0.0558729	-0.0339	-0.0185	-0.0586414	-0.0222	-0.0205	-0.0578032	-0.0208	-0.0285
0.463333	-0.0577192	-0.0264	-0.0311	-0.0565586	-0.0359	-0.0189	-0.0605974	-0.0222	-0.0228	-0.0615015	-0.0187	-0.0266
0.466667	-0.0582733	-0.0282	-0.0311	-0.0584192	-0.0353	-0.0192	-0.0592279	-0.0209	-0.0223	-0.0541792	-0.0174	-0.0269
0.47	-0.0514183	-0.029	-0.0282	-0.0607996	-0.0361	-0.0185	-0.0569563	-0.0202	-0.0225	-0.0569172	-0.0186	-0.027
0.473333	-0.0549316	-0.0302	-0.0291	-0.0580578	-0.0337	-0.0213	-0.0608597	-0.0202	-0.0209	-0.0591202	-0.0196	-0.0277
0.476667	-0.0605812	-0.0296	-0.0284	-0.058032	-0.0371	-0.02	-0.062027	-0.0215	-0.0206	-0.0578976	-0.0191	-0.0271
0.48	-0.0553188	-0.0291	-0.0283	-0.0642233	-0.0346	-0.0205	-0.0583181	-0.0241	-0.0207	-0.0601587	-0.0215	-0.0291
0.483333	-0.0547838	-0.0274	-0.0277	-0.0573292	-0.0349	-0.0215	-0.0614147	-0.0255	-0.0201	-0.0590181	-0.0225	-0.0292
0.486667	-0.0579891	-0.0276	-0.0286	-0.0615559	-0.0348	-0.0236	-0.0643425	-0.0273	-0.0191	-0.0613937	-0.0229	-0.0291
0.49	-0.0564594	-0.0276	-0.0276	-0.0617781	-0.0375	-0.0212	-0.0612011	-0.0272	-0.0192	-0.0645037	-0.0244	-0.0281
0.493333	-0.0620108	-0.0297	-0.0268	-0.061058	-0.035	-0.0212	-0.0618858	-0.0259	-0.02	-0.0647831	-0.0263	-0.0279
0.496667	-0.0612316	-0.0306	-0.0259	-0.0603714	-0.0358	-0.0198	-0.0619507	-0.0259	-0.0179	-0.0629416	-0.0252	-0.0272
0.5	0.00974465	0.0451	0.0425	0.00811005	-0.1511	0.0133	-0.0763989	0.0228	-0.0424	-0.111712	0.1233	-0.0371
0.503333	0.0523806	0.08	0.0564	0.046092	-0.1248	0.0252	-0.0394354	0.0383	-0.0299	-0.0971041	0.1377	-0.0274
0.506667	0.0864868	0.1113	0.0952	0.0747624	-0.0795	0.0867	-0.0146732	0.0612	0.0004	-0.0868216	0.1655	-0.0081
0.51	0.12063	0.1477	0.1248	0.108719	-0.0392	0.104	0.0138693	0.0942	0.0343	-0.0694475	0.1907	0.0124
0.513333	0.149829	0.1725	0.1509	0.135682	-0.0022	0.1434	0.0355549	0.1262	0.0617	-0.0618868	0.2147	0.0385
0.516667	0.180579	0.206	0.1773	0.15687	0.0338	0.1718	0.0545349	0.1503	0.0808	-0.0533953	0.2386	0.0569
0.52	0.199556	0.2424	0.2086	0.182308	0.069	0.2032	0.0733614	0.1784	0.1091	-0.0371752	0.2665	0.0793
0.523333	0.234733	0.2696	0.2318	0.207446	0.1009	0.2292	0.0956278	0.2061	0.1297	-0.0262966	0.2905	0.0991
0.526667	0.260302	0.293	0.2553	0.224642	0.1326	0.2543	0.112679	0.229	0.1472	-0.0207701	0.3112	0.1181
0.53	0.286032	0.3153	0.2764	0.247617	0.1591	0.2776	0.120512	0.2503	0.1658	-0.0118704	0.3314	0.1366
0.533333	0.309237	0.3383	0.297	0.268129	0.1855	0.2982	0.138863	0.2739	0.1916	-0.00506688	0.3524	0.1558
0.536667	0.33974	0.3558	0.3186	0.293071	0.2147	0.3198	0.152133	0.2949	0.2086	0.00636482	0.3732	0.1749
0.54	0.367293	0.3771	0.3386	0.317221	0.2409	0.3402	0.167211	0.3177	0.2356	0.015564	0.3925	0.1938
0.543333	0.394991	0.4029	0.3572	0.340894	0.2675	0.3634	0.179288	0.3396	0.2617	0.0223045	0.4118	0.2107
0.546667	0.422104	0.4291	0.3772	0.363047	0.2954	0.3842	0.195216	0.3601	0.2808	0.0286016	0.4302	0.2257
0.55	0.45178	0.4491	0.3978	0.388131	0.3197	0.4105	0.205449	0.3812	0.2968	0.0424509	0.449	0.2393
0.553333	0.485262	0.4704	0.4185	0.410913	0.3417	0.4341	0.219776	0.4032	0.3189	0.0424538	0.4684	0.2554
0.556667	0.51751	0.4947	0.4384	0.433876	0.3684	0.4551	0.240697	0.4235	0.3358	0.0511627	0.4846	0.2693
0.56	0.53985	0.5133	0.4603	0.46089	0.3927	0.4765	0.253098	0.4432	0.3487	0.0607643	0.5011	0.283
0.563333	0.57303	0.5344	0.4821	0.484534	0.4177	0.498	0.263725	0.4672	0.3693	0.0611534	0.5188	0.2976
0.566667	0.602291	0.5642	0.5033	0.513364	0.4434	0.5165	0.279359	0.4861	0.3873	0.0697041	0.5345	0.3117
0.57	0.63565	0.5923	0.5252	0.538891	0.4708	0.5374	0.290407	0.5056	0.402	0.0815477	0.5496	0.3256
0.573333	0.665391	0.6187	0.5473	0.557271	0.496	0.5568	0.307111	0.5278	0.4211	0.0909119	0.5648	0.339
0.576667	0.695405	0.6417	0.5681	0.586129	0.5219	0.58	0.315743	0.55	0.4413	0.0891876	0.5809	0.3538
0.58	0.732191	0.6634	0.5901	0.61225	0.5495	0.6047	0.331285	0.5682	0.4577	0.0982504	0.5985	0.3671
0.583333	0.758976	0.6894	0.6127	0.644737	0.5737	0.629	0.343835	0.5903	0.4792	0.105872	0.6116	0.3808
0.586667	0.789417	0.7205	0.6397	0.669799	0.5976	0.6458	0.360223	0.6109	0.4973	0.112063	0.6289	0.3961
0.59	0.820224	0.7465	0.6627	0.689013	0.6251	0.6716	0.376712	0.6297	0.5097	0.121159	0.6451	0.4081
0.593333	0.849519	0.7812	0.6858	0.716161	0.6497	0.6915	0.383482	0.6519	0.5231	0.126525	0.6602	0.421
0.596667	0.878628	0.8111	0.7096	0.744914	0.6783	0.7152	0.398504	0.6751	0.5406	0.135401	0.6718	0.4317
0.6	0.910229	0.8379	0.7341	0.770073	0.7092	0.7378	0.414659	0.6933	0.5552	0.142784	0.6863	0.4434
0.603333	0.935585	0.8638	0.7586	0.794987	0.7355	0.767	0.433001	0.7156	0.5729	0.150523	0.7035	0.4565
0.606667	0.968967	0.8902	0.7843	0.825317	0.7608	0.789	0.447024	0.7357	0.5913	0.153591	0.7169	0.4684
0.61	0.998921	0.916	0.81	0.85082	0.7907	0.8124	0.46267	0.7553	0.6132	0.16392	0.7328	0.4795
0.613333	1.02489	0.9479	0.8348	0.870263	0.8196	0.8345	0.475606	0.7754	0.6303	0.165564	0.7474	0.4916
0.616667	1.05697	0.9782	0.8604	0.899398	0.8441	0.8588	0.493084	0.7988	0.6511	0.176623	0.7631	0.5032
0.62	1.08218	1.0063	0.8878	0.925021	0.874	0.8803	0.497705	0.8197	0.6693	0.180573	0.7742	0.5151
0.623333	1.10528	1.0364	0.914	0.945213	0.9001	0.9079	0.518763	0.84	0.6848	0.189174	0.79	0.5262
0.626667	1.13974	1.0668	0.9391	0.978121	0.9255	0.93	0.532751	0.8629	0.6969	0.201815	0.8048	0.538
0.63	1.16758	1.094	0.9643	0.996402	0.9547	0.9564	0.548524	0.8867	0.7165	0.205263	0.8202	0.5495
0.633333	1.19646	1.1313	0.9893	1.02402	0.9842	0.9808	0.563452	0.9062	0.7303	0.214728	0.833	0.5616
0.636667	1.21927	1.1598	1.0177	1.0483	1.0087	1.0059	0.579708	0.9272	0.7461	0.217702	0.849	0.5724
0.64	1.24748	1.1957	1.0433	1.07812	1.0408	1.027	0.59586	0.9484	0.7688	0.22668	0.8628	0.5848
0.643333	1.26838	1.2309	1.071	1.10639	1.0689	1.0517	0.613167	0.9685	0.7866	0.235483	0.8753	0.5955
0.646667	1.29702	1.2592	1.0994	1.1264	1.0964	1.0735	0.62375	0.9895	0.8053	0.241656	0.8876	0.6066
0.65	1.32575	1.2902	1.1264	1.14737	1.1267	1.0968	0.642116	1.0145	0.8235	0.249459	0.9023	0.6145
0.653333	1.34599	1.3257	1.1539	1.17183	1.1575	1.1183	0.65775	1.0332	0.8423	0.250771	0.9192	0.6265
0.656667	1.37411	1.3537	1.1809	1.19669	1.1821	1.1439	0.672184	1.0567	0.8558	0.261506	0.9312	0.635
0.66	1.39856	1.3776	1.2069	1.22017	1.2106	1.1677	0.680002	1.0772	0.8734	0.268505	0.943	0.6458
0.663333	1.42498	1.4082	1.2323	1.23821	1.2361	1.1916	0.702871	1.0983	0.8898	0.276419	0.9564	0.6562
0.666667	1.45059	1.434	1.2601	1.26497	1.2612	1.2164	0.719829	1.1207	0.9084	0.285951	0.9681	0.6682
0.67	1.46902	1.4671	1.2903	1.2843	1.2893	1.2442	0.729403	1.144	0.9284	0.28971	0.9817	0.6799
0.673333	1.49896	1.4932	1.3169	1.31015	1.3187	1.2679	0.742126	1.1639	0.9451	0.297187	0.9929	0.6902
0.676667	1.51847	1.5241	1.3443	1.33282	1.3451	1.2915	0.758031	1.1853	0.9673	0.302695	1.0056	0.6988
0.68	1.54704	1.5579	1.3698	1.348	1.3725	1.3147	0.775856	1.2076	0.987	0.310395	1.0171	0.709
0.683333	1.57152	1.5866	1.3944	1.37176	1.4001	1.3402	0.787635	1.227	1.0045	0.319561	1.0272	0.7187
0.686667	1.58802	1.6158	1.4222	1.39247	1.4262	1.3618	0.810357	1.2512	1.0207	0.329658	1.0388	0.7297
0.69	1.61233	1.6442	1.447	1.4141	1.4519	1.387	0.819325	1.2728	1.0408	0.339299	1.051	0.7402
0.693333	1.63104	1.6724	1.4724	1.44347	1.4776	1.4104	0.836835	1.2922	1.0564	0.338612	1.06	0.7504
0.696667	1.65643	1.6975	1.4995	1.45773	1.5026	1.438	0.850572	1.3134	1.0738	0.346908	1.072	0.7608
0.7	1.67485	1.7255	1.526	1.47609	1.5262	1.4605	0.867084	1.3366	1.0896	0.354436	1.0847	0.7702
0.703333	1.69537	1.755	1.5536	1.49972	1.5526	1.4836	0.881367	1.3569	1.1075	0.364083	1.0992	0.779
0.706667	1.72172	1.7801	1.5796	1.52562	1.5767	1.5081	0.900579	1.3802	1.1263	0.371093	1.1098	0.7895
0.71	1.74098	1.8035	1.6043	1.54074	1.6026	1.5312	0.910612	1.4009	1.143	0.378134	1.1246	0.8
0.713333	1.75895	1.8295	1.6295	1.56235	1.6303	1.5529	0.923523	1.4219	1.1592	0.383772	1.1366	0.809
0.716667	1.78047	1.8581	1.6525	1.58001	1.6556	1.5796	0.942961	1.4403	1.175	0.390718	1.1482	0.8202
0.72	1.79996	1.8882	1.6799	1.59944	1.6778	1.6059	0.960505	1.4608	1.1902	0.399791	1.1587	0.8313
0.723333	1.82068	1.9166	1.7033	1.61693	1.7045	1.6276	0.973231	1.4803	1.2115	0.40662	1.1726	0.8401
0.726667	1.83831	1.9421	1.7279	1.6336	1.7309	1.6511	0.987555	1.5027	1.2313	0.422652	1.1834	0.8485
0.73	1.86239	1.9654	1.7509	1.65777	1.7534	1.6729	1.00039	1.5213	1.2475	0.428932	1.1943	0.8587
0.733333	1.87876	1.984	1.7746	1.67235	1.7788	1.6935	1.01654	1.5432	1.268	0.432614	1.2091	0.8671
0.736667	1.89795	2.0053	1.7999	1.69189	1.8047	1.7142	1.03683	1.5613	1.2863	0.441597	1.2219	0.8783
0.74	1.91426	2.029	1.8242	1.71028	1.827	1.7372	1.05029	1.5814	1.3018	0.448457	1.2347	0.8889
0.743333	1.93308	2.054	1.8469	1.72715	1.8506	1.7612	1.0597	1.6009	1.3186	0.456115	1.2476	0.8983
0.746667	1.95647	2.0823	1.8696	1.74548	1.8748	1.7864	1.07385	1.6227	1.3359	0.462462	1.2621	0.9064
0.75	1.97172	2.11	1.8942	1.76516	1.8956	1.8073	1.08932	1.6432	1.3554	0.471185	1.2731	0.9178
0.753333	1.9837	2.1383	1.9177	1.78194	1.9182	1.8315	1.10114	1.6627	1.3732	0.477762	1.2864	0.9266
0.756667	2.00084	2.1615	1.9414	1.79583	1.9411	1.8551	1.11856	1.681	1.3902	0.488272	1.2958	0.9368
0.76	2.02288	2.1817	1.9635	1.81205	1.9631	1.8749	1.13272	1.7021	1.4058	0.492918	1.3088	0.9476
0.763333	2.03136	2.2	1.9858	1.83098	1.9857	1.8966	1.14801	1.7225	1.4256	0.502719	1.319	0.9585
0.766667	2.05812	2.2196	2.0092	1.84849	2.0102	1.9189	1.16302	1.7415	1.4398	0.509794	1.3316	0.9673
0.77	2.07662	2.2438	2.0329	1.85804	2.0336	1.9368	1.17577	1.7605	1.4572	0.515691	1.3448	0.9775
0.773333	2.08653	2.2632	2.0539	1.88074	2.0545	1.9564	1.19658	1.78	1.4711	0.527332	1.3608	0.9855
0.776667	2.11095	2.288	2.0761	1.89205	2.0762	1.9786	1.20367	1.7967	1.4886	0.535698	1.373	0.9937
0.78	2.11901	2.3136	2.1003	1.90801	2.0965	2	1.22385	1.8167	1.5046	0.542075	1.3864	1.0027
0.783333	2.13204	2.3371	2.1215	1.93038	2.1173	2.0192	1.23324	1.8346	1.5224	0.551965	1.3993	1.012
0.786667	2.15118	2.3556	2.1454	1.94084	2.138	2.0418	1.24577	1.8532	1.5364	0.551345	1.412	1.0226
0.79	2.16973	2.3774	2.1666	1.95918	2.1574	2.0598	1.26108	1.8701	1.5582	0.564052	1.4214	1.0319
0.793333	2.17873	2.3982	2.1883	1.96901	2.1768	2.0805	1.27634	1.8884	1.5724	0.569602	1.4316	1.0429
0.796667	2.19726	2.417	2.2065	1.98425	2.1973	2.0978	1.28965	1.905	1.5903	0.584615	1.4397	1.0526
0.8	2.21226	2.4367	2.2257	1.99655	2.2169	2.1209	1.30153	1.9251	1.6109	0.589621	1.4462	1.0607
0.803333	2.22511	2.4649	2.2472	2.01519	2.236	2.1413	1.31088	1.9427	1.6268	0.595687	1.4592	1.0701
0.806667	2.23937	2.4889	2.2676	2.02988	2.2569	2.1634	1.32872	1.9606	1.6395	0.603995	1.4685	1.0793
0.81	2.25704	2.5086	2.287	2.0453	2.2757	2.181	1.34346	1.9795	1.6585	0.610698	1.4792	1.0871
0.813333	2.26622	2.5311	2.3067	2.05527	2.2928	2.2003	1.35206	1.9966	1.6729	0.623556	1.4921	1.0951
0.816667	2.27865	2.552	2.326	2.06618	2.3148	2.2164	1.36563	2.013	1.6837	0.627145	1.5074	1.1044
0.82	2.29711	2.5726	2.3483	2.08532	2.3337	2.2358	1.3799	2.0307	1.7006	0.634385	1.5168	1.1146
0.823333	2.31293	2.5878	2.3672	2.09732	2.3507	2.255	1.39433	2.0478	1.7138	0.646409	1.5295	1.1248
0.826667	2.3269	2.6005	2.386	2.11286	2.3705	2.2747	1.40729	2.0622	1.728	0.65796	1.5421	1.1346
0.83	2.33603	2.6157	2.4058	2.12623	2.3885	2.2939	1.41742	2.0794	1.7431	0.659031	1.5555	1.1453
0.833333	2.34752	2.6358	2.4241	2.13589	2.4052	2.3106	1.43155	2.0964	1.7587	0.666343	1.5661	1.1543
0.836667	2.36094	2.652	2.4438	2.14933	2.4237	2.3286	1.44663	2.1137	1.7726	0.67239	1.5796	1.1654
0.84	2.36863	2.6702	2.4623	2.16034	2.4425	2.3449	1.45819	2.1304	1.7887	0.679609	1.5924	1.1747
0.843333	2.38506	2.6946	2.4802	2.17339	2.4588	2.3605	1.46426	2.1486	1.8124	0.693172	1.6038	1.1838
0.846667	2.39526	2.7137	2.4977	2.18196	2.4761	2.3787	1.47635	2.1662	1.8269	0.698878	1.6138	1.1919
0.85	2.41065	2.732	2.5176	2.19544	2.492	2.3996	1.49535	2.1811	1.8435	0.706242	1.6246	1.2023
0.853333	2.41964	2.7488	2.5355	2.20434	2.5083	2.4163	1.50695	2.1977	1.8626	0.715421	1.6355	1.2108
0.856667	2.42472	2.7628	2.5544	2.21803	2.5223	2.4351	1.51331	2.2131	1.8767	0.721352	1.6447	1.2197
0.86	2.43935	2.7823	2.5724	2.23334	2.5389	2.4537	1.5342	2.2273	1.8879	0.731363	1.6553	1.2282
0.863333	2.4475	2.8022	2.5896	2.24287	2.5545	2.4679	1.54048	2.2413	1.9035	0.736017	1.6671	1.2364
0.866667	2.46024	2.8144	2.6058	2.25272	2.5705	2.4849	1.54871	2.2563	1.9158	0.741243	1.6789	1.2439
0.87	2.47509	2.8305	2.6241	2.268	2.588	2.4995	1.56817	2.2723	1.9313	0.754239	1.6918	1.2552
0.873333	2.48399	2.8476	2.6389	2.28089	2.6048	2.5166	1.5773	2.288	1.947	0.765255	1.7016	1.2635
0.876667	2.4973	2.8619	2.6549	2.28858	2.62	2.536	1.58765	2.3044	1.9589	0.770473	1.7102	1.2734
0.88	2.51071	2.87	2.6721	2.29975	2.6377	2.5545	1.59581	2.3182	1.9698	0.774825	1.7191	1.2853
0.883333	2.51057	2.8887	2.6882	2.30336	2.6533	2.5688	1.60804	2.3341	1.9844	0.78661	1.7325	1.2946
0.886667	2.52529	2.9073	2.705	2.31667	2.6685	2.5865	1.62749	2.3466	1.9969	0.792516	1.7479	1.304
0.89	2.52865	2.9233	2.7212	2.33164	2.6831	2.6	1.6356	2.3629	2.0095	0.801247	1.7625	1.3139
0.893333	2.54314	2.9364	2.7372	2.34506	2.6986	2.6163	1.64792	2.3769	2.024	0.812188	1.7764	1.3223
0.896667	2.55066	2.9524	2.7518	2.35068	2.7113	2.6275	1.65668	2.3906	2.0394	0.816215	1.7888	1.328
0.9	2.56436	2.9634	2.7668	2.36194	2.7239	2.6452	1.66788	2.404	2.0507	0.826525	1.7957	1.3399
0.903333	2.57389	2.9785	2.7844	2.37001	2.7348	2.6604	1.67879	2.4199	2.0631	0.834951	1.8071	1.3499
0.906667	2.57674	2.9931	2.8007	2.3779	2.7486	2.6755	1.6872	2.432	2.0822	0.839817	1.8169	1.3593
0.91	2.59118	3.0053	2.8156	2.39121	2.7617	2.6906	1.70188	2.4478	2.0975	0.847669	1.8279	1.3692
0.913333	2.5958	3.0224	2.8324	2.39868	2.7756	2.7074	1.70936	2.4629	2.1107	0.859894	1.8361	1.3805
0.916667	2.60788	3.0362	2.8471	2.40517	2.7877	2.7198	1.72183	2.4773	2.1265	0.865208	1.8479	1.3876
0.92	2.61228	3.0504	2.8622	2.41266	2.8032	2.7341	1.72597	2.4897	2.1422	0.86964	1.8572	1.3977
0.923333	2.62759	3.0643	2.8745	2.42335	2.8173	2.7489	1.73652	2.505	2.1513	0.882407	1.8671	1.4059
0.926667	2.635	3.0791	2.8899	2.43362	2.8315	2.7639	1.74976	2.5177	2.1628	0.886583	1.8758	1.4127
0.93	2.64014	3.0901	2.9016	2.44335	2.8435	2.7795	1.75897	2.5302	2.1759	0.895116	1.8877	1.4205
0.933333	2.64979	3.1029	2.9165	2.44526	2.857	2.7923	1.77321	2.5416	2.1892	0.902746	1.8983	1.4278
0.936667	2.65952	3.1146	2.9292	2.4559	2.8691	2.8056	1.7797	2.5561	2.1992	0.912215	1.9095	1.4369
0.94	2.66578	3.1276	2.9445	2.46484	2.8808	2.8169	1.79322	2.5679	2.211	0.913073	1.92	1.4463
0.943333	2.67377	3.1379	2.9567	2.47087	2.8934	2.8303	1.80088	2.5826	2.2208	0.928091	1.9303	1.4564
0.946667	2.68657	3.1493	2.9703	2.48215	2.9086	2.8423	1.814	2.5957	2.2339	0.934996	1.9409	1.4664
0.95	2.68689	3.1615	2.9821	2.49013	2.9209	2.8568	1.82023	2.6102	2.2442	0.94724	1.9501	1.4754
0.953333	2.69348	3.1765	2.997	2.49595	2.934	2.8676	1.83003	2.6225	2.2598	0.946352	1.9594	1.4844
0.956667	2.69897	3.1884	3.0075	2.50609	2.9438	2.8808	1.84505	2.6352	2.2749	0.962003	1.969	1.4928
0.96	2.70735	3.2002	3.0203	2.51597	2.9547	2.8916	1.85198	2.6459	2.2873	0.966195	1.9788	1.5013
0.963333	2.72176	3.2159	3.0328	2.51827	2.9631	2.9064	1.86411	2.6587	2.2969	0.972752	1.99	1.5096
0.966667	2.72368	3.2288	3.0449	2.52959	2.9749	2.9189	1.86752	2.6709	2.3146	0.97747	1.999	1.519
0.97	2.72574	3.2409	3.0586	2.54096	2.9847	2.9318	1.87501	2.6846	2.3244	0.9874	2.0088	1.5289
0.973333	2.73171	3.25	3.0714	2.54375	2.9977	2.9428	1.87957	2.6953	2.3342	0.997845	2.0201	1.5379
0.976667	2.74132	3.2618	3.0833	2.55025	3.0056	2.9506	1.89663	2.7074	2.3464	1.00144	2.0315	1.5468
0.98	2.74767	3.268	3.0942	2.55974	3.0154	2.9625	1.90435	2.7176	2.3604	1.01079	2.0379	1.5568
0.983333	2.75741	3.2772	3.1047	2.56632	3.0225	2.9731	1.9131	2.7285	2.369	1.01662	2.0488	1.5655
0.986667	2.75909	3.2837	3.117	2.56781	3.0298	2.9885	1.92085	2.7389	2.3792	1.02476	2.0591	1.5744
0.99	2.76391	3.2979	3.1275	2.57832	3.0369	2.9989	1.93477	2.7532	2.3907	1.02918	2.0685	1.5821
0.993333	2.77259	3.3058	3.1379	2.59168	3.0484	3.0134	1.93889	2.7643	2.4021	1.03762	2.0765	1.5904
0.996667	2.78238	3.3192	3.149	2.5907	3.0596	3.0217	1.94825	2.7766	2.4132	1.05003	2.0894	1.5967
1	2.78479	3.33	3.1621	2.60159	3.0735	3.0343	1.95676	2.7874	2.4221	1.05849	2.098	1.6073
1.00333	2.7917	3.3466	3.1709	2.60546	3.0843	3.0411	1.96786	2.799	2.4352	1.06912	2.1091	1.6166
1.00667	2.79205	3.352	3.1815	2.61202	3.099	3.0496	1.97394	2.8093	2.4458	1.07055	2.1177	1.625
1.01	2.8014	3.3651	3.1917	2.61137	3.1105	3.0615	1.98107	2.8207	2.4603	1.07946	2.1259	1.6345
1.01333	2.80329	3.3699	3.2018	2.62516	3.1203	3.0782	1.99525	2.8315	2.4683	1.08685	2.1305	1.6435
1.01667	2.81283	3.3758	3.2106	2.62988	3.1306	3.0835	1.99971	2.8418	2.4798	1.09145	2.1402	1.6499
1.02	2.81365	3.3858	3.2234	2.63507	3.1439	3.0981	2.00542	2.8521	2.4882	1.10174	2.1511	1.6582
1.02333	2.82241	3.3986	3.2342	2.64582	3.1532	3.1125	2.01777	2.8627	2.5021	1.11145	2.1623	1.6672
1.02667	2.83006	3.4079	3.2425	2.65023	3.165	3.1243	2.02218	2.8737	2.5118	1.11156	2.173	1.6753
1.03	2.83639	3.4209	3.2531	2.65237	3.1783	3.1299	2.0246	2.8831	2.5229	1.12418	2.1831	1.6827
1.03333	2.83809	3.4298	3.263	2.65754	3.1888	3.1449	2.03511	2.8949	2.5351	1.12498	2.1945	1.6904
1.03667	2.83978	3.4359	3.2731	2.66659	3.1954	3.1501	2.04714	2.9054	2.5486	1.1387	2.2043	1.7013
1.04	2.8497	3.4374	3.2825	2.67006	3.2068	3.1615	2.05604	2.9149	2.5552	1.14808	2.2109	1.7093
1.04333	2.85199	3.4414	3.2932	2.67562	3.2154	3.1683	2.06335	2.9263	2.5667	1.15676	2.2198	1.7172
1.04667	2.85984	3.447	3.3012	2.68278	3.2226	3.1811	2.06531	2.9365	2.577	1.16109	2.2335	1.7276
1.05	2.86283	3.4541	3.31	2.68939	3.232	3.1912	2.07514	2.9435	2.5842	1.16572	2.2426	1.7368
1.05333	2.86491	3.4664	3.3189	2.69613	3.2411	3.204	2.0815	2.9528	2.5933	1.17312	2.2505	1.7444
1.05667	2.87316	3.4781	3.327	2.7002	3.248	3.2138	2.08525	2.9647	2.6022	1.18481	2.2584	1.7522
1.06	2.87457	3.4906	3.336	2.7025	3.2574	3.2209	2.09506	2.9737	2.6114	1.1855	2.2672	1.7612
1.06333	2.88217	3.4974	3.3449	2.71194	3.2646	3.228	2.10771	2.9842	2.6205	1.19395	2.275	1.7677
1.06667	2.8854	3.5082	3.3526	2.71308	3.2695	3.2384	2.10727	2.9928	2.631	1.20447	2.2814	1.7757
1.07	2.88845	3.5151	3.3615	2.71941	3.2773	3.2463	2.12446	3.0021	2.6417	1.20859	2.2905	1.7853
1.07333	2.89659	3.5234	3.3692	2.71644	3.2848	3.2556	2.1266	3.0109	2.654	1.21756	2.3015	1.7937
1.07667	2.89905	3.5289	3.3768	2.73056	3.2907	3.2644	2.13524	3.0202	2.6638	1.22163	2.3129	1.8032
1.08	2.90471	3.5402	3.3837	2.72892	3.2983	3.2714	2.14067	3.029	2.6762	1.2302	2.3217	1.8109
1.08333	2.9095	3.5467	3.3911	2.7371	3.3072	3.2773	2.14665	3.0397	2.6873	1.24184	2.3308	1.819
1.08667	2.91332	3.5514	3.4012	2.7435	3.3161	3.2845	2.15061	3.0473	2.6967	1.24384	2.342	1.8274
1.09	2.91258	3.5583	3.4095	2.74891	3.3243	3.2942	2.16324	3.0565	2.7043	1.24924	2.3488	1.8374
1.09333	2.92106	3.5668	3.4169	2.74758	3.3333	3.3052	2.16881	3.0638	2.7086	1.26192	2.3548	1.8433
1.09667	2.92582	3.5708	3.4252	2.75737	3.3399	3.315	2.17409	3.0725	2.7143	1.26478	2.3584	1.8543
1.1	2.92485	3.5778	3.4327	2.763	3.3499	3.3231	2.1764	3.0806	2.7266	1.27329	2.3676	1.862
1.10333	2.92697	3.593	3.4389	2.7659	3.3569	3.3338	2.18243	3.0894	2.7335	1.27911	2.3779	1.8693
1.10667	2.93451	3.6011	3.4464	2.76841	3.3654	3.3364	2.19014	3.0967	2.7439	1.29029	2.3872	1.8756
1.11	2.93571	3.6055	3.4543	2.76957	3.3721	3.3418	2.19822	3.1073	2.7566	1.28947	2.3961	1.8818
1.11333	2.93651	3.607	3.4604	2.77702	3.3815	3.3548	2.20249	3.1164	2.7664	1.29965	2.4085	1.8861
1.11667	2.94609	3.6114	3.468	2.78303	3.3878	3.3625	2.20905	3.1255	2.771	1.30531	2.4171	1.8938
1.12	2.94592	3.6066	3.4758	2.78659	3.3957	3.3658	2.21629	3.131	2.7793	1.31262	2.423	1.903
1.12333	2.94539	3.6075	3.4813	2.78927	3.4012	3.3755	2.22356	3.137	2.7848	1.32376	2.4316	1.9103
1.12667	2.95143	3.6108	3.4864	2.78608	3.406	3.3823	2.23292	3.1424	2.7934	1.32549	2.4397	1.9197
1.13	2.96001	3.6221	3.4936	2.79882	3.4095	3.3866	2.23546	3.149	2.8045	1.33369	2.4461	1.9291
1.13333	2.9577	3.6276	3.4985	2.79967	3.413	3.3929	2.2404	3.1543	2.8137	1.33771	2.4532	1.9376
1.13667	2.96687	3.6347	3.5033	2.80721	3.4203	3.4017	2.24507	3.164	2.8223	1.35023	2.4611	1.9446
1.14	2.9668	3.6418	3.5091	2.80735	3.4296	3.4106	2.2533	3.1736	2.8309	1.35305	2.4677	1.9551
1.14333	2.96699	3.6511	3.5156	2.81221	3.4421	3.4192	2.25616	3.1814	2.8382	1.35975	2.4776	1.9613
1.14667	2.97482	3.6535	3.5198	2.82056	3.461	3.4246	2.26187	3.1883	2.8447	1.3742	2.4867	1.9685
1.15	2.96916	3.6591	3.5255	2.82198	3.4791	3.4345	2.26475	3.1983	2.8493	1.37644	2.4938	1.975
1.15333	2.98003	3.6683	3.5321	2.82538	3.4962	3.4462	2.27302	3.2041	2.859	1.37948	2.5029	1.9834
1.15667	2.98285	3.6734	3.538	2.8267	3.5129	3.4501	2.28521	3.2105	2.8671	1.39058	2.5127	1.9893
1.16	2.98451	3.6769	3.5427	2.83192	3.5249	3.4582	2.29204	3.2181	2.8742	1.39449	2.5167	2.0002
1.16333	2.99156	3.6851	3.5481	2.83525	3.5307	3.4631	2.29089	3.2248	2.878	1.4026	2.5266	2.0065
1.16667	2.98907	3.6928	3.5546	2.83857	3.5383	3.4734	2.29785	3.2306	2.8864	1.41099	2.5345	2.0144
1.17	2.99341	3.6987	3.5609	2.84154	3.5433	3.4771	2.30368	3.238	2.8903	1.41681	2.5439	2.0203
1.17333	2.99799	3.7031	3.5665	2.84459	3.5469	3.4861	2.31425	3.2427	2.8978	1.42337	2.5494	2.0286
1.17667	3.00621	3.7015	3.5725	2.84788	3.5538	3.4912	2.31084	3.249	2.9042	1.42402	2.5584	2.0329
1.18	3.00089	3.7062	3.5792	2.85384	3.5594	3.4969	2.31894	3.2557	2.9115	1.4281	2.5631	2.0412
1.18333	3.00586	3.7109	3.5844	2.85382	3.5646	3.4993	2.32141	3.2618	2.9184	1.43854	2.5699	2.0478
1.18667	3.00866	3.7169	3.5895	2.85539	3.5696	3.5033	2.3262	3.2678	2.9278	1.44302	2.5789	2.0561
1.19	3.0117	3.7188	3.5958	2.85828	3.5752	3.5056	2.331	3.2755	2.9361	1.45302	2.5873	2.0621
1.19333	3.01391	3.7299	3.6005	2.86523	3.5801	3.5117	2.33987	3.2793	2.9423	1.45825	2.5952	2.0694
1.19667	3.01841	3.7331	3.6058	2.86643	3.5843	3.5175	2.34492	3.2842	2.947	1.46405	2.6003	2.076
1.2	3.01759	3.7374	3.6107	2.87002	3.5895	3.5205	2.35183	3.2887	2.9527	1.47459	2.6071	2.083
1.20333	3.01697	3.7392	3.6162	2.87754	3.5931	3.5269	2.3523	3.2959	2.9556	1.47588	2.613	2.0906
1.20667	3.02574	3.7487	3.6201	2.88214	3.5982	3.5368	2.35695	3.3014	2.961	1.48283	2.6191	2.0998
1.21	3.02383	3.7496	3.6251	2.8837	3.602	3.5391	2.36499	3.31	2.969	1.49449	2.624	2.1045
1.21333	3.02721	3.7507	3.6295	2.88159	3.6061	3.5425	2.36367	3.3169	2.9771	1.49701	2.6313	2.1105
1.21667	3.0348	3.755	3.634	2.88845	3.6102	3.5523	2.36962	3.3235	2.9839	1.50452	2.6383	2.1168
1.22	3.03266	3.754	3.6381	2.88848	3.6164	3.5555	2.382	3.3262	2.9922	1.51058	2.644	2.1227
1.22333	3.03668	3.7564	3.6418	2.88972	3.6216	3.5548	2.37836	3.3334	3.0008	1.5206	2.6524	2.1287
1.22667	3.03906	3.7617	3.6451	2.89296	3.6254	3.563	2.3826	3.3369	3.0087	1.52443	2.6592	2.14
1.23	3.03856	3.7713	3.6493	2.89985	3.6293	3.5719	2.38528	3.3431	3.0147	1.52777	2.6675	2.1452
1.23333	3.04653	3.7726	3.6529	2.90199	3.6329	3.5719	2.39274	3.347	3.0209	1.53057	2.6715	2.1524
1.23667	3.04332	3.783	3.6573	2.90082	3.6357	3.5802	2.39729	3.3533	3.0272	1.54148	2.6775	2.1608
1.24	3.04884	3.7822	3.6613	2.90777	3.6402	3.5855	2.40803	3.3573	3.0282	1.55408	2.6834	2.1697
1.24333	3.04824	3.7855	3.6679	2.90734	3.642	3.5881	2.40961	3.3613	3.0354	1.5546	2.6916	2.1743
1.24667	3.0496	3.7855	3.6707	2.91337	3.649	3.5896	2.40882	3.3645	3.041	1.55442	2.6953	2.1828
1.25	3.0566	3.7868	3.6736	2.91543	3.6538	3.5928	2.41358	3.3713	3.0477	1.56198	2.7039	2.1903
1.25333	3.0575	3.7918	3.6786	2.91371	3.6578	3.5968	2.42323	3.3751	3.0498	1.57259	2.7114	2.1965
1.25667	3.05143	3.7996	3.6831	2.91829	3.661	3.6015	2.42813	3.3787	3.0555	1.57873	2.7176	2.199
1.26	3.06793	3.8018	3.6849	2.92477	3.6693	3.6071	2.43076	3.383	3.0569	1.58033	2.724	2.2055
1.26333	3.05804	3.8033	3.6891	2.9254	3.6742	3.6139	2.43266	3.3883	3.0624	1.58826	2.7334	2.212
1.26667	3.06526	3.8117	3.693	2.93188	3.6791	3.6199	2.43905	3.3936	3.0668	1.59659	2.7386	2.2172
1.27	3.06029	3.8135	3.696	2.93558	3.6815	3.6232	2.44625	3.3991	3.0721	1.60273	2.747	2.2215
1.27333	3.06601	3.8183	3.6999	2.93225	3.6856	3.6275	2.44678	3.4031	3.0809	1.59891	2.7545	2.2314
1.27667	3.06849	3.8242	3.702	2.93298	3.688	3.6312	2.4483	3.409	3.0863	1.6101	2.7628	2.2357
1.28	3.07344	3.832	3.7053	2.93935	3.6914	3.6354	2.44894	3.4128	3.0928	1.62182	2.7697	2.2428
1.28333	3.06588	3.8308	3.7092	2.9387	3.6949	3.6397	2.45212	3.4175	3.1004	1.6304	2.7763	2.2498
1.28667	3.07354	3.8345	3.7124	2.93974	3.7015	3.6423	2.46326	3.4217	3.1049	1.62749	2.7789	2.2577
1.29	3.0723	3.8346	3.7141	2.94198	3.7049	3.6465	2.46113	3.4264	3.1051	1.63887	2.7834	2.2628
1.29333	3.07604	3.8361	3.718	2.94819	3.7078	3.6479	2.46931	3.4294	3.1088	1.6439	2.7849	2.2697
1.29667	3.08049	3.8348	3.7214	2.95026	3.7092	3.6534	2.47242	3.4332	3.1136	1.64098	2.7906	2.2751
1.3	3.08347	3.8403	3.723	2.95087	3.7113	3.6571	2.47278	3.4374	3.1164	1.64857	2.7961	2.2807
1.30333	3.08591	3.8371	3.7242	2.95038	3.7133	3.6624	2.47782	3.4423	3.1219	1.66495	2.8022	2.2862
1.30667	3.08234	3.8396	3.728	2.95594	3.716	3.666	2.48155	3.4452	3.1315	1.66478	2.8102	2.2946
1.31	3.08509	3.8444	3.7302	2.95847	3.7195	3.6727	2.48192	3.4517	3.1357	1.6679	2.8188	2.3014
1.31333	3.08498	3.8462	3.7312	2.95914	3.7221	3.6726	2.49069	3.4545	3.1419	1.67828	2.822	2.3065
1.31667	3.08785	3.8461	3.7353	2.95915	3.7262	3.6758	2.49225	3.4568	3.1445	1.68355	2.826	2.3133
1.32	3.09476	3.8553	3.7403	2.96469	3.7302	3.6782	2.49202	3.4602	3.148	1.68648	2.8342	2.3186
1.32333	3.0948	3.8596	3.7434	2.96579	3.7328	3.6827	2.50214	3.4653	3.1491	1.69111	2.8382	2.3253
1.32667	3.09185	3.86	3.747	2.96951	3.7335	3.6868	2.50138	3.4669	3.1567	1.69948	2.8398	2.3317
1.33	3.09733	3.87	3.7522	2.96996	3.7377	3.6904	2.50365	3.4712	3.1607	1.69973	2.845	2.3386
1.33333	3.09653	3.8703	3.7547	2.97178	3.7421	3.6925	2.50696	3.4748	3.1666	1.70894	2.8524	2.3432
1.33667	3.09929	3.8703	3.7572	2.97355	3.7449	3.6963	2.51253	3.4782	3.1721	1.70877	2.8577	2.3485
1.34	3.09944	3.8719	3.7611	2.98323	3.7497	3.6968	2.51429	3.4821	3.1775	1.7152	2.8646	2.3529
1.34333	3.10107	3.8743	3.7636	2.97948	3.7558	3.6981	2.52274	3.4869	3.1796	1.72642	2.8748	2.3577
1.34667	3.10715	3.8701	3.7663	2.98405	3.759	3.7037	2.52652	3.4907	3.1813	1.73233	2.8813	2.3612
1.35	3.10417	3.8739	3.7696	2.98598	3.7611	3.7092	2.52543	3.4941	3.1866	1.72889	2.8873	2.3673
1.35333	3.1064	3.8746	3.7714	2.98495	3.7653	3.7139	2.53155	3.4961	3.1911	1.73989	2.8928	2.3742
1.35667	3.11057	3.8755	3.7733	2.98278	3.7667	3.7171	2.52732	3.5015	3.1916	1.74207	2.8996	2.3803
1.36	3.11042	3.8761	3.7754	2.99076	3.7681	3.722	2.53843	3.5013	3.1951	1.7541	2.9038	2.384
1.36333	3.10798	3.8777	3.7774	2.9929	3.7708	3.7236	2.534	3.5044	3.1983	1.75389	2.9114	2.3919
1.36667	3.11934	3.8786	3.7794	2.99723	3.7724	3.7265	2.54259	3.5076	3.1992	1.76333	2.9156	2.3969
1.37	3.1095	3.8849	3.7817	2.99455	3.7731	3.7281	2.54095	3.5122	3.203	1.76632	2.921	2.3998
1.37333	3.11719	3.8834	3.7838	2.99674	3.7775	3.7311	2.54812	3.5127	3.2117	1.76834	2.9228	2.4056
1.37667	3.11621	3.888	3.7863	2.99831	3.7819	3.7315	2.55753	3.5179	3.2145	1.77326	2.9255	2.4129
1.38	3.11429	3.8883	3.7873	3.00361	3.785	3.7334	2.55829	3.5197	3.2189	1.78393	2.9257	2.4187
1.38333	3.11912	3.8916	3.7898	3.00189	3.7901	3.7343	2.55579	3.5223	3.2229	1.78224	2.9307	2.4232
1.38667	3.12141	3.8908	3.7924	3.00201	3.7949	3.7339	2.56388	3.524	3.2248	1.78973	2.9333	2.4303
1.39	3.11827	3.8981	3.7935	3.00467	3.7962	3.7385	2.561	3.5297	3.2276	1.78986	2.938	2.4365
1.39333	3.11805	3.8995	3.7967	3.0107	3.7993	3.7431	2.56977	3.5328	3.2332	1.79886	2.9454	2.4422
1.39667	3.12287	3.9022	3.7989	3.01076	3.8008	3.7471	2.56841	3.5371	3.234	1.80219	2.9535	2.4453
1.4	3.12453	3.9049	3.7995	3.00764	3.8026	3.7498	2.56806	3.5404	3.2373	1.80767	2.9593	2.4514
1.40333	3.13111	3.9082	3.8029	3.01608	3.806	3.7535	2.57294	3.5433	3.2445	1.81743	2.9662	2.4562
1.40667	3.12926	3.9096	3.8062	3.01319	3.8099	3.756	2.57366	3.5441	3.2488	1.82091	2.975	2.4608
1.41	3.13302	3.9108	3.8073	3.0154	3.8119	3.7577	2.58515	3.5471	3.2537	1.831	2.9785	2.4652
1.41333	3.12932	3.913	3.8094	3.01666	3.8159	3.7609	2.58347	3.5483	3.2561	1.82986	2.9833	2.4712
1.41667	3.13301	3.9158	3.8119	3.02208	3.8169	3.7632	2.58368	3.5513	3.2602	1.83571	2.9877	2.4751
1.42	3.12945	3.9156	3.8126	3.02051	3.8187	3.7673	2.59207	3.5539	3.2635	1.83818	2.9892	2.4792
1.42333	3.13109	3.9153	3.8134	3.02079	3.8187	3.7683	2.5944	3.5571	3.262	1.84048	2.9909	2.4832
1.42667	3.13328	3.9163	3.8145	3.02555	3.8203	3.7709	2.59216	3.5589	3.2647	1.84706	2.991	2.4877
1.43	3.13513	3.9184	3.8159	3.02348	3.8205	3.7732	2.59185	3.5628	3.27	1.85332	2.9908	2.4913
1.43333	3.14021	3.9181	3.817	3.03101	3.8231	3.7765	2.59744	3.5659	3.2711	1.859	2.992	2.496
1.43667	3.1384	3.9232	3.8187	3.02792	3.8223	3.7776	2.6095	3.5672	3.2719	1.86046	2.9985	2.5
1.44	3.13504	3.9268	3.8208	3.02881	3.8246	3.7786	2.60853	3.5671	3.2752	1.86836	3.0032	2.5053
1.44333	3.13982	3.9273	3.8234	3.03102	3.826	3.7805	2.6061	3.5695	3.2773	1.87401	3.0112	2.5094
1.44667	3.14919	3.9281	3.825	3.03333	3.8305	3.7823	2.61091	3.5731	3.2819	1.87553	3.0195	2.5148
1.45	3.14407	3.932	3.8265	3.0387	3.8335	3.7848	2.60959	3.574	3.2827	1.88354	3.0262	2.5188
1.45333	3.14463	3.9319	3.8287	3.0386	3.8358	3.7876	2.61603	3.5784	3.2836	1.88596	3.0268	2.5242
1.45667	3.14588	3.9342	3.8291	3.03814	3.8384	3.7961	2.62588	3.583	3.2847	1.89163	3.0291	2.5298
1.46	3.14197	3.9335	3.8294	3.04102	3.8407	3.7966	2.62187	3.5852	3.2863	1.89901	3.0325	2.5334
1.46333	3.14676	3.9358	3.8306	3.0438	3.8398	3.796	2.62079	3.5869	3.2888	1.90475	3.0352	2.5366
1.46667	3.14459	3.9347	3.8348	3.04061	3.8407	3.8025	2.61935	3.5892	3.2952	1.90292	3.0376	2.5416
1.47	3.14895	3.9356	3.8362	3.04378	3.8439	3.801	2.62547	3.5909	3.2978	1.90886	3.0442	2.5456
1.47333	3.15197	3.9382	3.8398	3.04556	3.8453	3.8003	2.62621	3.5928	3.3038	1.91461	3.0518	2.5498
1.47667	3.14926	3.9418	3.8421	3.04651	3.8472	3.8058	2.63281	3.5968	3.3046	1.9148	3.054	2.5546
1.48	3.14978	3.9432	3.8429	3.04496	3.8493	3.8113	2.63661	3.597	3.3052	1.92012	3.0556	2.5591
1.48333	3.15393	3.9456	3.8415	3.04913	3.8516	3.8096	2.63328	3.5979	3.305	1.92629	3.058	2.5636
1.48667	3.15373	3.9477	3.8422	3.04938	3.853	3.8154	2.63517	3.5988	3.3092	1.93334	3.0615	2.5689
1.49	3.15157	3.9428	3.8418	3.05534	3.8561	3.8161	2.64148	3.5992	3.3143	1.93753	3.0626	2.575
1.49333	3.15122	3.9452	3.8432	3.04853	3.8587	3.8163	2.64061	3.6006	3.3193	1.94236	3.0646	2.5783
1.49667	3.1558	3.9437	3.8451	3.05299	3.8611	3.8155	2.64374	3.6041	3.3228	1.94655	3.0685	2.5832
1.5	3.16389	3.9425	3.8476	3.05315	3.8596	3.8182	2.64901	3.6065	3.3244	1.95139	3.074	2.5874
1.50333	3.1607	3.9459	3.849	3.05746	3.8624	3.8194	2.65007	3.6086	3.3258	1.95464	3.0772	2.5902
1.50667	3.15594	3.95	3.852	3.05915	3.8626	3.8225	2.65249	3.6107	3.3237	1.95553	3.0834	2.5935
1.51	3.15814	3.9516	3.8524	3.06267	3.8628	3.8259	2.65631	3.6104	3.3229	1.95733	3.0884	2.5992
1.51333	3.16414	3.9595	3.854	3.05889	3.8651	3.83	2.65524	3.6109	3.3236	1.96371	3.0913	2.6032
1.51667	3.16228	3.9655	3.8543	3.06349	3.8688	3.8289	2.66229	3.6124	3.3273	1.97137	3.0949	2.608
1.52	3.16642	3.9612	3.8549	3.06176	3.8682	3.832	2.66155	3.6131	3.3279	1.96987	3.0968	2.6135
1.52333	3.16447	3.962	3.8552	3.06427	3.8691	3.8315	2.66342	3.6144	3.3306	1.97684	3.1014	2.6178
1.52667	3.15854	3.9632	3.8579	3.06485	3.8722	3.8325	2.66385	3.6168	3.3346	1.98203	3.1046	2.622
1.53	3.16089	3.9617	3.8585	3.06881	3.873	3.8336	2.66788	3.6177	3.3368	1.9841	3.1106	2.6272
1.53333	3.16522	3.9612	3.8597	3.06791	3.8733	3.8372	2.67116	3.6189	3.3416	1.98862	3.1142	2.6312
1.53667	3.17002	3.9672	3.8603	3.06711	3.8769	3.8375	2.67235	3.6198	3.3456	1.99042	3.1189	2.6355
1.54	3.16676	3.9714	3.8624	3.06774	3.8789	3.8416	2.67006	3.6217	3.3476	1.99638	3.1191	2.639
1.54333	3.16518	3.973	3.864	3.0694	3.8788	3.8379	2.67415	3.6219	3.3479	1.99958	3.1234	2.6423
1.54667	3.16865	3.9743	3.8653	3.0686	3.8815	3.8404	2.67669	3.6256	3.3466	2.00825	3.124	2.6456
1.55	3.16888	3.9742	3.8656	3.07476	3.8839	3.8427	2.68	3.6282	3.3458	2.01156	3.1257	2.6468
1.55333	3.16962	3.9721	3.867	3.07292	3.8847	3.8461	2.68345	3.6303	3.3443	2.01636	3.1276	2.6487
1.55667	3.16872	3.973	3.8669	3.07748	3.8873	3.8456	2.68587	3.633	3.3456	2.01221	3.1318	2.6539
1.56	3.17591	3.973	3.8662	3.07551	3.8892	3.8506	2.68564	3.6349	3.3502	2.01696	3.1339	2.6564
1.56333	3.17228	3.9695	3.8673	3.08402	3.8896	3.8494	2.68793	3.6356	3.354	2.02008	3.1378	2.6573
1.56667	3.17326	3.9706	3.8698	3.08093	3.8931	3.8506	2.69085	3.6339	3.3574	2.03456	3.1411	2.6619
1.57	3.17256	3.9735	3.8714	3.07785	3.8941	3.8511	2.689	3.6357	3.3589	2.03424	3.1422	2.6663
1.57333	3.17103	3.972	3.8728	3.08052	3.8933	3.8546	2.69329	3.6354	3.3581	2.03391	3.146	2.6693
1.57667	3.17656	3.971	3.8724	3.08385	3.895	3.856	2.69751	3.6375	3.3573	2.03927	3.1497	2.6732
1.58	3.1731	3.973	3.873	3.08456	3.8956	3.8604	2.6994	3.6385	3.3587	2.04672	3.1527	2.6781
1.58333	3.17266	3.9716	3.8734	3.08431	3.8946	3.8603	2.69578	3.6419	3.3569	2.05072	3.1534	2.6847
1.58667	3.17718	3.9678	3.8751	3.0794	3.8985	3.8613	2.69947	3.643	3.3604	2.05236	3.1573	2.6879
1.59	3.17283	3.9677	3.8749	3.08423	3.9015	3.8595	2.69723	3.644	3.3652	2.05824	3.1597	2.6935
1.59333	3.17608	3.9702	3.8758	3.0813	3.9011	3.8631	2.70789	3.645	3.3652	2.06386	3.1606	2.6984
1.59667	3.17986	3.9718	3.877	3.08945	3.9031	3.8636	2.70525	3.6472	3.3682	2.06696	3.1638	2.7021
1.6	3.17929	3.976	3.8766	3.08338	3.9059	3.8662	2.71068	3.649	3.3712	2.06694	3.167	2.7022
1.60333	3.17785	3.9819	3.8755	3.09183	3.905	3.8654	2.7039	3.6502	3.374	2.06752	3.1713	2.7057
1.60667	3.18252	3.9818	3.8759	3.0872	3.9052	3.87	2.70859	3.6523	3.3769	2.07171	3.1705	2.7065
1.61	3.17714	3.9802	3.8776	3.09124	3.9066	3.8677	2.70921	3.6533	3.3811	2.0782	3.174	2.7084
1.61333	3.18425	3.9795	3.8783	3.09946	3.9058	3.8701	2.71688	3.6538	3.38	2.07905	3.1754	2.7123
1.61667	3.18367	3.9811	3.8799	3.09155	3.9048	3.8699	2.71257	3.6516	3.382	2.08761	3.1776	2.7157
1.62	3.18274	3.9811	3.8812	3.095	3.906	3.8723	2.7193	3.6521	3.383	2.09514	3.1781	2.7173
1.62333	3.18115	3.9855	3.8821	3.093	3.9078	3.8703	2.71754	3.6516	3.3805	2.09121	3.185	2.7207
1.62667	3.18363	3.9885	3.8814	3.0974	3.9092	3.8735	2.72304	3.6543	3.3828	2.09838	3.1861	2.7255
1.63	3.18501	3.9944	3.8817	3.09566	3.9113	3.8706	2.7252	3.6561	3.3849	2.09598	3.1859	2.7284
1.63333	3.18663	3.9943	3.8821	3.09746	3.9115	3.8732	2.72591	3.6587	3.3854	2.10505	3.1892	2.7335
1.63667	3.18309	3.9959	3.8839	3.09591	3.9113	3.8753	2.72934	3.6591	3.3862	2.10241	3.1912	2.7376
1.64	3.18638	3.9918	3.8837	3.09965	3.9128	3.8785	2.73218	3.6617	3.3871	2.10429	3.1932	2.7409
1.64333	3.18414	3.9963	3.8852	3.10273	3.915	3.8791	2.72661	3.6584	3.3864	2.10501	3.1932	2.7423
1.64667	3.18464	3.9979	3.8854	3.10368	3.9145	3.8807	2.73007	3.6583	3.391	2.11554	3.197	2.7458
1.65	3.18944	3.9928	3.8855	3.10719	3.9173	3.8781	2.73524	3.6602	3.3916	2.11436	3.2005	2.7477
1.65333	3.18945	3.992	3.8836	3.10568	3.9186	3.8783	2.72961	3.6632	3.3915	2.12102	3.2034	2.7494
1.65667	3.18835	3.9994	3.8845	3.10134	3.9174	3.8783	2.73345	3.6631	3.3933	2.12482	3.2054	2.7531
1.66	3.19719	3.995	3.8853	3.09756	3.9179	3.8803	2.7362	3.6654	3.3906	2.12845	3.2103	2.7567
1.66333	3.1856	3.9933	3.886	3.11247	3.9201	3.8836	2.74088	3.6651	3.3885	2.13179	3.2143	2.7585
1.66667	3.19187	3.9994	3.8862	3.1077	3.9199	3.8871	2.73996	3.6654	3.3923	2.13597	3.2142	2.7599
1.67	3.19708	3.9975	3.8877	3.10181	3.9215	3.8887	2.74061	3.6645	3.3933	2.13825	3.2155	2.7643
1.67333	3.19231	3.9963	3.8879	3.10368	3.9222	3.8905	2.74334	3.6663	3.3942	2.1418	3.2141	2.767
1.67667	3.19271	4.0021	3.8882	3.10977	3.9219	3.8884	2.73805	3.6681	3.4004	2.14203	3.2161	2.7686
1.68	3.19094	4.0027	3.8882	3.10939	3.9257	3.8875	2.74774	3.6695	3.399	2.1471	3.2171	2.7716
1.68333	3.19042	4.0001	3.8885	3.10646	3.9277	3.886	2.74411	3.6711	3.3972	2.15136	3.2194	2.7744
1.68667	3.19684	4.0028	3.8893	3.10782	3.9273	3.886	2.75044	3.6719	3.3983	2.15357	3.2221	2.7746
1.69	3.19324	4.0016	3.8912	3.10952	3.9295	3.886	2.75672	3.6726	3.3984	2.15936	3.2267	2.7774
1.69333	3.18769	4.0013	3.8924	3.1065	3.93	3.89	2.74908	3.6724	3.3985	2.16194	3.2277	2.781
1.69667	3.19927	4.0026	3.8933	3.11523	3.9266	3.8927	2.75255	3.6731	3.4036	2.16273	3.227	2.7829
1.7	3.20004	4.006	3.8927	3.11055	3.9252	3.8956	2.75277	3.6734	3.4057	2.16523	3.2301	2.7869
1.70333	3.20096	4.0085	3.8922	3.11068	3.9247	3.8947	2.75505	3.6747	3.407	2.17693	3.2315	2.7911
1.70667	3.19663	4.0036	3.8931	3.11418	3.9238	3.8956	2.75872	3.6751	3.4107	2.16854	3.2327	2.7945
1.71	3.19889	3.9956	3.8919	3.11356	3.9247	3.894	2.75725	3.6768	3.4103	2.17673	3.2327	2.7962
1.71333	3.19714	3.9924	3.8923	3.12143	3.9274	3.8949	2.76108	3.6746	3.4085	2.17101	3.2379	2.7983
1.71667	3.19374	3.9922	3.8934	3.12173	3.9287	3.8951	2.76097	3.6748	3.4058	2.17927	3.2392	2.8007
1.72	3.20253	3.991	3.8949	3.12312	3.9295	3.8977	2.76046	3.6764	3.4046	2.18325	3.2411	2.8028
1.72333	3.19756	3.9976	3.894	3.11779	3.9322	3.8983	2.76165	3.6772	3.4053	2.18052	3.2427	2.8058
1.72667	3.19971	4.0021	3.8955	3.11909	3.9311	3.9006	2.76021	3.6774	3.4062	2.18961	3.2453	2.8074
1.73	3.1949	4.0025	3.8962	3.12018	3.9297	3.9005	2.76584	3.6802	3.4074	2.19028	3.2452	2.8094
1.73333	3.20493	4.0015	3.8968	3.12452	3.9317	3.901	2.76902	3.6807	3.4096	2.19552	3.2487	2.81
1.73667	3.20124	4.002	3.8961	3.12475	3.9334	3.9019	2.76771	3.6789	3.4077	2.20081	3.2507	2.8118
1.74	3.20523	4.004	3.8977	3.12053	3.9334	3.9027	2.77164	3.6801	3.4049	2.19758	3.2534	2.8138
1.74333	3.19553	4.0056	3.8975	3.12072	3.9358	3.902	2.76881	3.6792	3.4048	2.19953	3.2568	2.8178
1.74667	3.20167	4.0057	3.8974	3.12069	3.9364	3.9026	2.77317	3.6801	3.4063	2.21098	3.2606	2.8186
1.75	3.20374	4.0103	3.8973	3.12442	3.9361	3.9029	2.77127	3.6796	3.407	2.20675	3.2598	2.822
1.75333	3.20363	4.0097	3.8973	3.12299	3.9369	3.9004	2.77286	3.6804	3.4103	2.2136	3.2614	2.8251
1.75667	3.20617	4.003	3.8954	3.12468	3.9378	3.9031	2.77736	3.679	3.4128	2.21399	3.2635	2.826
1.76	3.20489	4.0012	3.8954	3.12319	3.9393	3.9019	2.77758	3.6816	3.4123	2.21388	3.2639	2.8272
1.76333	3.20533	3.9999	3.8951	3.12915	3.9412	3.9032	2.77397	3.6815	3.4113	2.21301	3.2609	2.8312
1.76667	3.20241	3.9956	3.8968	3.12811	3.9423	3.9008	2.78049	3.682	3.4109	2.21964	3.2608	2.8322
1.77	3.20303	3.9939	3.896	3.13155	3.9397	3.9046	2.78454	3.6833	3.4138	2.22246	3.2622	2.8337
1.77333	3.20175	3.9929	3.8965	3.12714	3.9394	3.9013	2.78441	3.6852	3.4167	2.22845	3.2604	2.8356
1.77667	3.21139	3.995	3.8976	3.12365	3.9387	3.9059	2.78157	3.6847	3.4194	2.23039	3.2607	2.8366
1.78	3.20397	4.0037	3.8989	3.1291	3.9391	3.9037	2.78737	3.6856	3.4206	2.23582	3.2646	2.8381
1.78333	3.20626	4.008	3.8979	3.12987	3.9384	3.9071	2.78504	3.6852	3.4225	2.23699	3.2667	2.8402
1.78667	3.20612	4.008	3.8994	3.13016	3.9407	3.9041	2.79065	3.6847	3.4212	2.24299	3.2663	2.8416
1.79	3.20568	4.0126	3.9015	3.12716	3.9419	3.9079	2.78845	3.6845	3.4188	2.23961	3.2684	2.8441
1.79333	3.20817	4.0098	3.9007	3.13084	3.9412	3.9068	2.78342	3.6846	3.4197	2.23738	3.2715	2.8463
1.79667	3.21284	4.0027	3.8989	3.13556	3.9407	3.9092	2.79178	3.6845	3.4188	2.24553	3.2716	2.8491
1.8	3.20974	3.9979	3.8992	3.13051	3.943	3.9081	2.78743	3.6852	3.4196	2.2515	3.2721	2.8514
1.80333	3.2078	4.0023	3.9002	3.13857	3.9444	3.9097	2.7957	3.6869	3.4206	2.25029	3.2728	2.8529
1.80667	3.21252	4.009	3.8989	3.13669	3.945	3.9073	2.79769	3.6864	3.4199	2.24952	3.278	2.8553
1.81	3.21061	4.0122	3.8988	3.12878	3.9479	3.9092	2.80046	3.6874	3.4213	2.2577	3.2779	2.8573
1.81333	3.21293	4.0145	3.8997	3.13215	3.9492	3.9113	2.79875	3.6867	3.4261	2.25396	3.2796	2.8574
1.81667	3.21691	4.019	3.8992	3.13484	3.9483	3.9118	2.79644	3.6881	3.4284	2.25726	3.2792	2.8589
1.82	3.21156	4.0127	3.8984	3.13445	3.9497	3.9123	2.7979	3.6881	3.4287	2.26582	3.2807	2.8612
1.82333	3.21129	4.0057	3.9	3.13764	3.9471	3.9139	2.79805	3.6881	3.4281	2.26504	3.279	2.8623
1.82667	3.21299	4.0032	3.9006	3.14123	3.9483	3.9103	2.80109	3.6886	3.4269	2.26735	3.2811	2.8639
1.83	3.21365	3.9982	3.9022	3.13643	3.9492	3.9099	2.80288	3.6899	3.4212	2.26729	3.2791	2.865
1.83333	3.21912	3.9974	3.9036	3.13913	3.9505	3.9126	2.79907	3.6892	3.4215	2.27404	3.282	2.8649
1.83667	3.216	4.0016	3.904	3.13562	3.9514	3.9134	2.79975	3.6883	3.4202	2.27196	3.2831	2.8667
1.84	3.211	4.0092	3.9039	3.13857	3.9559	3.9123	2.80506	3.6892	3.4245	2.27909	3.2844	2.8682
1.84333	3.21502	4.0143	3.9041	3.14248	3.9553	3.9158	2.80891	3.6873	3.4229	2.28219	3.2823	2.8684
1.84667	3.20735	4.0206	3.9034	3.13905	3.9532	3.913	2.80815	3.6877	3.4264	2.28535	3.2853	2.8708
1.85	3.21638	4.0214	3.9034	3.13652	3.9543	3.9135	2.79887	3.6877	3.4256	2.27984	3.2855	2.8736
1.85333	3.21374	4.0238	3.9035	3.13921	3.9534	3.9147	2.80716	3.6882	3.4261	2.28433	3.2882	2.8729
1.85667	3.21645	4.0187	3.9022	3.14255	3.9498	3.9168	2.80831	3.6863	3.4246	2.28453	3.2897	2.8752
1.86	3.21403	4.0173	3.9023	3.13814	3.949	3.9154	2.81751	3.6876	3.425	2.28688	3.2908	2.8774
1.86333	3.21567	4.0157	3.9025	3.14489	3.9504	3.9182	2.8181	3.6875	3.4266	2.29473	3.2942	2.8793
1.86667	3.21893	4.01	3.9026	3.14374	3.948	3.9162	2.81419	3.6898	3.428	2.29164	3.2957	2.8805
1.87	3.21641	4.0084	3.9035	3.14632	3.9501	3.9168	2.81568	3.6905	3.4298	2.29664	3.2944	2.8833
1.87333	3.22034	4.012	3.9036	3.13798	3.9528	3.9182	2.81711	3.6934	3.4274	2.30053	3.2924	2.8843
1.87667	3.21946	4.015	3.9029	3.14516	3.9548	3.9192	2.82024	3.6926	3.4288	2.30017	3.2939	2.8861
1.88	3.224	4.016	3.9025	3.14507	3.956	3.9159	2.81262	3.6916	3.425	2.2995	3.2935	2.8875
1.88333	3.22587	4.0236	3.9035	3.1476	3.9553	3.9201	2.81442	3.6893	3.4227	2.30076	3.2961	2.8877
1.88667	3.22027	4.0255	3.9026	3.14986	3.954	3.9201	2.8152	3.689	3.4201	2.30904	3.298	2.8903
1.89	3.21944	4.0223	3.9023	3.14668	3.954	3.9182	2.8226	3.6888	3.4214	2.30875	3.3024	2.8913
1.89333	3.21716	4.0157	3.9035	3.14365	3.9529	3.9169	2.82239	3.6902	3.4218	2.31262	3.3043	2.8927
1.89667	3.21584	4.0125	3.9035	3.14796	3.9529	3.9217	2.82094	3.6916	3.4229	2.31469	3.305	2.8932
1.9	3.22023	4.009	3.903	3.14813	3.956	3.92	2.82233	3.6911	3.4204	2.32104	3.3023	2.8958
1.90333	3.21679	4.0077	3.9038	3.14643	3.9599	3.9183	2.8206	3.6914	3.4227	2.31584	3.3032	2.8971
1.90667	3.21757	4.0094	3.9044	3.14611	3.9615	3.9193	2.82443	3.6904	3.4262	2.31693	3.3023	2.9
1.91	3.22356	4.0107	3.9032	3.14973	3.9629	3.9192	2.82364	3.691	3.4277	2.32408	3.3026	2.9011
1.91333	3.22181	4.0145	3.904	3.14825	3.9659	3.9183	2.8257	3.6898	3.4252	2.32042	3.3007	2.9037
1.91667	3.21929	4.014	3.9029	3.14834	3.9666	3.9176	2.8221	3.6907	3.4307	2.32607	3.3028	2.9033
1.92	3.22388	4.0125	3.902	3.1498	3.9658	3.9205	2.82862	3.6903	3.4307	2.32451	3.3035	2.9033
1.92333	3.21864	4.012	3.9011	3.15253	3.9656	3.9196	2.82626	3.6908	3.4294	2.33398	3.3064	2.9047
1.92667	3.21884	4.0186	3.9008	3.14722	3.968	3.9212	2.82896	3.6883	3.427	2.33289	3.3086	2.9072
1.93	3.22492	4.0173	3.9001	3.148	3.9675	3.9212	2.83054	3.6883	3.4333	2.33951	3.3115	2.9081
1.93333	3.22042	4.0178	3.9004	3.15354	3.9678	3.9222	2.82517	3.6874	3.4306	2.33209	3.3121	2.9096
1.93667	3.22997	4.0188	3.9004	3.15305	3.9657	3.9209	2.82614	3.6884	3.4281	2.33859	3.3126	2.9117
1.94	3.22421	4.0172	3.9014	3.15195	3.9634	3.9189	2.8314	3.6888	3.4273	2.34068	3.3125	2.9126
1.94333	3.21988	4.012	3.9015	3.1476	3.9608	3.919	2.83116	3.6904	3.427	2.3417	3.3131	2.9118
1.94667	3.22365	4.0109	3.9004	3.1501	3.9608	3.9185	2.83004	3.6905	3.4228	2.34361	3.3118	2.9127
1.95	3.22302	4.0087	3.8998	3.15855	3.9613	3.9191	2.83177	3.6912	3.4203	2.3445	3.3103	2.9143
1.95333	3.22381	4.0078	3.9001	3.14927	3.9633	3.9179	2.83814	3.6898	3.4243	2.3457	3.3106	2.916
1.95667	3.22565	4.0034	3.9009	3.1563	3.9655	3.9223	2.83413	3.6896	3.4267	2.34313	3.3092	2.9166
1.96	3.22336	4.0028	3.9021	3.15723	3.9644	3.9231	2.83433	3.6895	3.4279	2.34988	3.3069	2.9195
1.96333	3.21908	4.0022	3.9031	3.15441	3.9661	3.9223	2.83644	3.6911	3.4286	2.35471	3.308	2.9206
1.96667	3.22479	3.9995	3.9038	3.15404	3.9662	3.9197	2.84296	3.6888	3.4316	2.35706	3.311	2.9222
1.97	3.22817	3.9984	3.9028	3.16232	3.9663	3.9179	2.8354	3.6904	3.4312	2.35466	3.3113	2.9229
1.97333	3.22844	4.0043	3.9016	3.15752	3.9678	3.919	2.84084	3.6893	3.4299	2.35793	3.313	2.9252
1.97667	3.22664	3.9994	3.9012	3.15472	3.9701	3.918	2.83741	3.6892	3.4288	2.35817	3.3147	2.9251
1.98	3.22424	3.9983	3.9006	3.15837	3.9689	3.9186	2.83967	3.687	3.4276	2.35949	3.3161	2.9264
1.98333	3.22863	4.0052	3.8997	3.15181	3.9693	3.9189	2.84051	3.6905	3.4292	2.35944	3.3142	2.9277
1.98667	3.22518	4.0068	3.8997	3.15396	3.9704	3.9252	2.84229	3.6895	3.427	2.36112	3.3156	2.928
1.99	3.22824	4.0059	3.9	3.15294	3.9687	3.9221	2.84229	3.6899	3.4244	2.36143	3.3167	2.9281
1.99333	3.22807	4.0122	3.8994	3.1568	3.9687	3.922	2.84417	3.6884	3.4257	2.36569	3.3158	2.9295
1.99667	3.22492	4.016	3.899	3.15535	3.969	3.921	2.84294	3.6898	3.428	2.3672	3.3164	2.9302
2	3.22563	4.0189	3.8988	3.1585	3.9679	3.9223	2.84558	3.6881	3.4271	2.37214	3.3183	2.9312
2.00333	3.22643	4.0205	3.8983	3.15604	3.964	3.9216	2.84463	3.6898	3.426	2.37358	3.3181	2.933
2.00667	3.22512	4.0156	3.8972	3.1593	3.9659	3.9239	2.84946	3.6885	3.4259	2.3712	3.3195	2.934
2.01	3.22701	4.0088	3.8966	3.15254	3.9665	3.9239	2.8472	3.6892	3.4248	2.37487	3.3183	2.9356
2.01333	3.22485	4.0052	3.8965	3.15657	3.9655	3.9238	2.85187	3.6892	3.4248	2.37155	3.3158	2.9365
2.01667	3.22936	3.9999	3.8958	3.15639	3.9672	3.9237	2.85162	3.6891	3.4229	2.379	3.3162	2.9374
2.02	3.2249	3.9992	3.8968	3.16216	3.9704	3.9243	2.84965	3.688	3.4257	2.3792	3.3152	2.9367
2.02333	3.22872	4.005	3.8968	3.15806	3.9697	3.9226	2.84529	3.6873	3.4292	2.37823	3.3156	2.938
2.02667	3.22713	4.0124	3.8982	3.15563	3.9702	3.924	2.85125	3.6889	3.4285	2.38863	3.3189	2.9386
2.03	3.22629	4.0147	3.8987	3.15976	3.9692	3.9253	2.84779	3.6871	3.4292	2.38079	3.3188	2.9387
2.03333	3.22491	4.0153	3.8994	3.15526	3.9669	3.9285	2.85048	3.6874	3.4288	2.38679	3.318	2.9382
2.03667	3.23045	4.0175	3.898	3.15947	3.9663	3.9261	2.85301	3.6877	3.43	2.38339	3.3187	2.9409
2.04	3.22577	4.0177	3.8981	3.16267	3.9683	3.9271	2.85345	3.6893	3.427	2.38661	3.3152	2.9415
2.04333	3.22994	4.0183	3.8968	3.16458	3.9686	3.9276	2.84843	3.6881	3.4293	2.39496	3.3154	2.9412
2.04667	3.23137	4.0198	3.8962	3.16739	3.9713	3.929	2.84911	3.6903	3.4286	2.38968	3.3183	2.9429
2.05	3.22575	4.0182	3.8954	3.16446	3.9721	3.926	2.85173	3.6909	3.4274	2.38643	3.3212	2.9456
2.05333	3.23155	4.0162	3.895	3.15882	3.9703	3.9264	2.85721	3.6892	3.427	2.39362	3.3195	2.9464
2.05667	3.22759	4.0167	3.8943	3.15966	3.9659	3.927	2.85518	3.6884	3.4252	2.39574	3.3198	2.9469
2.06	3.22998	4.0185	3.8939	3.16066	3.9656	3.9264	2.8583	3.6876	3.4205	2.40033	3.3223	2.9485
2.06333	3.22598	4.0152	3.8928	3.16349	3.9634	3.9266	2.85736	3.6841	3.4228	2.39824	3.3199	2.9486
2.06667	3.22919	4.0145	3.8924	3.15903	3.9666	3.9279	2.85803	3.6828	3.4252	2.39855	3.3205	2.9491
2.07	3.22905	4.0139	3.8925	3.16436	3.967	3.9265	2.8512	3.6833	3.4232	2.40205	3.3208	2.9486
2.07333	3.23361	4.0101	3.8923	3.16042	3.9711	3.9272	2.85705	3.6832	3.4264	2.40388	3.3237	2.9498
2.07667	3.2292	4.0043	3.8927	3.16615	3.9703	3.9282	2.85848	3.6847	3.4289	2.4029	3.3218	2.9497
2.08	3.23806	4.0045	3.8924	3.16647	3.9728	3.9273	2.86502	3.6865	3.4259	2.41281	3.3255	2.9519
2.08333	3.23337	4.0053	3.8939	3.16896	3.9681	3.9257	2.86339	3.6861	3.424	2.41157	3.325	2.9511
2.08667	3.23698	4.0043	3.8932	3.16608	3.972	3.9264	2.85653	3.6851	3.424	2.41295	3.3268	2.9527
2.09	3.23771	4.0048	3.8938	3.1605	3.9685	3.9244	2.86579	3.6854	3.4204	2.41339	3.3258	2.9526
2.09333	3.2322	4.0079	3.8924	3.16333	3.969	3.9247	2.86241	3.6841	3.4205	2.40832	3.3268	2.9545
2.09667	3.2346	4.0127	3.8933	3.16479	3.9661	3.9255	2.85824	3.684	3.4196	2.41413	3.3269	2.9544
2.1	3.23086	4.0124	3.8924	3.16413	3.9686	3.9272	2.86139	3.6842	3.4206	2.41739	3.3258	2.9559
2.10333	3.22573	4.0138	3.8925	3.16542	3.9649	3.9264	2.86461	3.6845	3.4171	2.41547	3.325	2.9565
2.10667	3.22949	4.012	3.8928	3.16758	3.9684	3.9243	2.86966	3.6845	3.4165	2.41365	3.3244	2.9585
2.11	3.22937	4.0094	3.8925	3.16083	3.9697	3.9228	2.8597	3.682	3.4204	2.41754	3.3269	2.959
2.11333	3.23473	4.0027	3.8922	3.17141	3.9699	3.9225	2.86221	3.6829	3.421	2.41656	3.3279	2.9606
2.11667	3.23183	4.0037	3.8926	3.17026	3.9707	3.9229	2.86782	3.6829	3.4189	2.42014	3.33	2.9602
2.12	3.23238	4.0038	3.8927	3.16483	3.9712	3.9249	2.86747	3.6839	3.4242	2.41927	3.3315	2.9607
2.12333	3.23286	4.0042	3.8902	3.16895	3.9695	3.9265	2.86266	3.6829	3.4228	2.4213	3.3315	2.9601
2.12667	3.23197	4.0066	3.8912	3.16631	3.9702	3.9274	2.87016	3.6843	3.4213	2.42539	3.3274	2.9601
2.13	3.22828	4.0094	3.8903	3.17202	3.9714	3.9264	2.86547	3.683	3.418	2.42625	3.3258	2.9588
2.13333	3.23422	4.0097	3.8894	3.16867	3.9696	3.9263	2.8644	3.6827	3.4203	2.429	3.3248	2.9608
2.13667	3.23493	4.0097	3.8887	3.16944	3.9693	3.9252	2.86404	3.682	3.418	2.42763	3.3255	2.9608
2.14	3.23554	4.0131	3.8902	3.16486	3.9678	3.9244	2.86968	3.6823	3.4209	2.42253	3.3272	2.9626
2.14333	3.23589	4.0061	3.8891	3.16653	3.9669	3.9229	2.86767	3.6812	3.4168	2.42654	3.3268	2.9641
2.14667	3.23797	4.0015	3.8896	3.16623	3.9663	3.9247	2.86844	3.6819	3.4184	2.42929	3.3273	2.9659
2.15	3.23082	4.0027	3.89	3.17283	3.9686	3.9238	2.86846	3.6825	3.4172	2.43234	3.3268	2.9656
2.15333	3.2357	3.9975	3.8907	3.16759	3.9676	3.9229	2.87768	3.6825	3.417	2.43057	3.3263	2.9667
2.15667	3.23443	3.9955	3.8892	3.16582	3.9698	3.9245	2.87278	3.6833	3.4111	2.43302	3.3246	2.9671
2.16	3.23882	4.0013	3.8893	3.16811	3.9665	3.9228	2.87427	3.6827	3.4135	2.43205	3.3283	2.9664
2.16333	3.22802	4.0041	3.8879	3.16625	3.9657	3.9197	2.87405	3.6813	3.4145	2.43513	3.3268	2.9663
2.16667	3.23583	4.003	3.8864	3.16373	3.9642	3.9215	2.87346	3.68	3.4139	2.44278	3.3255	2.9661
2.17	3.23671	4.0085	3.885	3.16724	3.9644	3.9224	2.87195	3.6799	3.4133	2.43957	3.3254	2.9658
2.17333	3.23919	4.0091	3.8857	3.16711	3.9635	3.9223	2.88046	3.6799	3.4194	2.43644	3.3258	2.965
2.17667	3.23397	4.0094	3.8865	3.16926	3.9651	3.925	2.87653	3.6804	3.4173	2.44226	3.3225	2.9645
2.18	3.22822	4.0101	3.8866	3.16937	3.9654	3.9255	2.87535	3.6797	3.4151	2.44173	3.3258	2.965
2.18333	3.23199	4.0088	3.886	3.16965	3.966	3.9214	2.87708	3.6808	3.4147	2.43978	3.3258	2.9663
2.18667	3.23196	4.0068	3.8862	3.16766	3.9653	3.9228	2.87492	3.6796	3.4165	2.44189	3.3233	2.9666
2.19	3.23213	4.0043	3.8862	3.16948	3.9632	3.9217	2.87417	3.6788	3.4149	2.44698	3.3244	2.9665
2.19333	3.2342	4.0017	3.8851	3.1661	3.9626	3.9224	2.87768	3.6783	3.4153	2.44315	3.3235	2.967
2.19667	3.23465	4.0028	3.8847	3.17169	3.9638	3.9235	2.88	3.6791	3.4147	2.44398	3.3217	2.9676
2.2	3.23672	4.002	3.8852	3.17257	3.9633	3.9243	2.88109	3.6777	3.4145	2.44781	3.3224	2.9685
2.20333	3.23296	4.0036	3.8842	3.1727	3.9611	3.9204	2.87609	3.6772	3.4115	2.45014	3.3255	2.9673
2.20667	3.23518	4.0003	3.8834	3.16829	3.9649	3.9221	2.87959	3.6769	3.4105	2.45093	3.326	2.9686
2.21	3.2359	3.9973	3.884	3.17001	3.9674	3.9203	2.87649	3.6765	3.4085	2.4485	3.3244	2.9705
2.21333	3.2351	3.995	3.8836	3.17102	3.9635	3.9188	2.88153	3.6756	3.4088	2.44744	3.3253	2.9696
2.21667	3.23682	3.9923	3.8827	3.16843	3.9636	3.9196	2.88177	3.6735	3.4095	2.45093	3.3248	2.9692
2.22	3.23888	3.9909	3.8843	3.17052	3.9644	3.9201	2.87999	3.6729	3.4083	2.45451	3.3225	2.9706
2.22333	3.23462	3.9941	3.8843	3.1694	3.9614	3.919	2.886	3.6711	3.4069	2.45049	3.3205	2.9698
2.22667	3.23515	3.9979	3.883	3.16715	3.9598	3.9174	2.88638	3.6724	3.4098	2.46243	3.322	2.9695
2.23	3.23691	4.0005	3.884	3.16639	3.9617	3.9184	2.88191	3.6718	3.4125	2.45793	3.3195	2.9697
2.23333	3.24054	4.0012	3.8841	3.17088	3.958	3.9153	2.8798	3.6731	3.4098	2.4587	3.3195	2.9695
2.23667	3.23635	4.0019	3.8829	3.17494	3.9606	3.9151	2.88243	3.6716	3.4111	2.45743	3.3198	2.969
2.24	3.23655	3.999	3.8823	3.17613	3.9602	3.9163	2.88224	3.6722	3.4113	2.45819	3.3207	2.9693
2.24333	3.24229	3.9982	3.8813	3.17373	3.9582	3.9183	2.87809	3.6713	3.4101	2.46176	3.3201	2.9691
2.24667	3.23967	3.9957	3.8798	3.17107	3.9584	3.9167	2.88343	3.6713	3.4068	2.46037	3.3196	2.9697
2.25	3.23803	3.994	3.8805	3.16445	3.9593	3.9206	2.88026	3.6709	3.409	2.4617	3.3195	2.9698
2.25333	3.23919	3.9925	3.8801	3.17016	3.9607	3.9203	2.88616	3.6727	3.4066	2.46428	3.3226	2.9716
2.25667	3.23536	3.9961	3.879	3.17524	3.961	3.9171	2.88944	3.6728	3.4112	2.46408	3.3221	2.9725
2.26	3.23736	3.9963	3.88	3.17144	3.9613	3.9184	2.87935	3.6718	3.4103	2.46405	3.3219	2.9722
2.26333	3.239	3.9998	3.8793	3.17396	3.9595	3.9195	2.89267	3.672	3.4103	2.46562	3.3214	2.9729
2.26667	3.24289	4.001	3.8781	3.17364	3.9602	3.9185	2.88929	3.6714	3.4085	2.46679	3.3209	2.9734
2.27	3.24255	3.9985	3.8788	3.17059	3.9564	3.9193	2.8872	3.6724	3.4129	2.46753	3.3162	2.9733
2.27333	3.23863	3.9992	3.8788	3.17692	3.9583	3.9193	2.88435	3.6723	3.4088	2.46658	3.3146	2.9732
2.27667	3.23754	3.9928	3.878	3.17058	3.9574	3.9156	2.88941	3.6728	3.406	2.46512	3.3125	2.9729
2.28	3.23913	3.987	3.8784	3.17796	3.9586	3.9178	2.88496	3.6708	3.4058	2.47076	3.3138	2.9718
2.28333	3.24264	3.9836	3.8776	3.17298	3.9563	3.9159	2.88535	3.6714	3.4047	2.46871	3.3138	2.9706
2.28667	3.24115	3.986	3.8767	3.17298	3.9565	3.9174	2.8867	3.6681	3.4004	2.47739	3.3148	2.9695
2.29	3.24145	3.9907	3.877	3.17501	3.9526	3.9184	2.88822	3.6693	3.4005	2.46808	3.3162	2.9695
2.29333	3.23975	3.9915	3.8768	3.17086	3.9549	3.918	2.88925	3.6685	3.4005	2.47488	3.3193	2.9695
2.29667	3.23854	3.992	3.8759	3.17789	3.9519	3.914	2.88769	3.6696	3.4005	2.47844	3.316	2.9701
2.3	3.2399	4.0004	3.8766	3.17196	3.9558	3.9154	2.88903	3.6683	3.4015	2.47598	3.3177	2.9705
2.30333	3.24301	3.9961	3.8763	3.17493	3.9556	3.9138	2.88621	3.6688	3.4015	2.47826	3.3188	2.9698
2.30667	3.23587	3.9891	3.8766	3.17048	3.9575	3.9146	2.88664	3.6667	3.4009	2.47415	3.3192	2.967
2.31	3.24031	3.9975	3.8768	3.17124	3.9536	3.9162	2.89862	3.6669	3.4012	2.47882	3.3177	2.9675
2.31333	3.24007	3.9991	3.878	3.1774	3.957	3.9161	2.88748	3.6657	3.399	2.47526	3.3211	2.9675
2.31667	3.23581	3.9968	3.8772	3.17042	3.9549	3.9139	2.88812	3.6639	3.3981	2.4783	3.3177	2.9674
2.32	3.23558	3.9998	3.8755	3.17865	3.9556	3.9135	2.88738	3.6642	3.3951	2.47358	3.3161	2.9671
2.32333	3.24516	4.002	3.873	3.17667	3.9517	3.9133	2.89009	3.6632	3.3945	2.47814	3.3158	2.9694
2.32667	3.23946	3.9956	3.871	3.17454	3.9541	3.9136	2.89185	3.6627	3.3968	2.48418	3.319	2.9692
2.33	3.23929	3.9979	3.8692	3.17646	3.9523	3.9152	2.8957	3.6616	3.4002	2.47964	3.3204	2.9684
2.33333	3.24234	3.9969	3.8682	3.17104	3.9534	3.9153	2.89014	3.6632	3.3977	2.47145	3.3217	2.9683
2.33667	3.23899	3.9968	3.8691	3.17477	3.9501	3.9153	2.89212	3.6625	3.4012	2.4721	3.3228	2.9698
2.34	3.23991	3.9891	3.8711	3.17799	3.9534	3.912	2.89464	3.662	3.4009	2.48327	3.3199	2.9695
2.34333	3.24031	3.9896	3.8731	3.17381	3.952	3.9136	2.89349	3.6612	3.398	2.48245	3.3157	2.9687
2.34667	3.23712	3.9846	3.8733	3.17221	3.9526	3.9129	2.8936	3.6612	3.3937	2.47891	3.3141	2.9677
2.35	3.24031	3.9838	3.8733	3.17592	3.9486	3.9147	2.89423	3.6608	3.3939	2.48356	3.3141	2.9682
2.35333	3.23708	3.9834	3.8727	3.17801	3.9498	3.9149	2.89454	3.6609	3.3935	2.48027	3.3136	2.9685
2.35667	3.24322	3.9887	3.8718	3.17851	3.9477	3.9163	2.89271	3.6612	3.3909	2.48663	3.3144	2.9681
2.36	3.2427	3.9899	3.8699	3.17745	3.9493	3.9161	2.89217	3.6629	3.3912	2.48315	3.3164	2.9686
2.36333	3.23956	3.9895	3.8693	3.17738	3.9471	3.9164	2.89227	3.6617	3.3935	2.49008	3.3144	2.97
2.36667	3.23706	3.9886	3.8702	3.17212	3.9485	3.914	2.88802	3.6603	3.395	2.48354	3.3134	2.9691
2.37	3.23868	3.9832	3.8699	3.17496	3.947	3.9129	2.89848	3.66	3.3943	2.48914	3.3147	2.9678
2.37333	3.23925	3.9802	3.8685	3.18107	3.9467	3.9126	2.89532	3.6593	3.3972	2.48894	3.3155	2.9687
2.37667	3.2401	3.9791	3.8687	3.1747	3.944	3.9097	2.90445	3.6582	3.3957	2.48269	3.3129	2.9699
2.38	3.24157	3.9813	3.8692	3.17994	3.9435	3.9097	2.89552	3.6597	3.394	2.48851	3.3104	2.9711
2.38333	3.24447	3.9805	3.8674	3.17397	3.9441	3.9107	2.90193	3.6589	3.3916	2.49506	3.3116	2.972
2.38667	3.23735	3.9835	3.8674	3.16832	3.9435	3.9114	2.8974	3.659	3.3893	2.49546	3.3073	2.9721
2.39	3.2363	3.9823	3.868	3.17539	3.9443	3.912	2.90373	3.6591	3.3866	2.49379	3.3048	2.9699
2.39333	3.23584	3.9844	3.8673	3.17789	3.9433	3.9128	2.89501	3.6574	3.3855	2.49155	3.3081	2.9678
2.39667	3.24583	3.9823	3.8668	3.17839	3.9443	3.9122	2.89513	3.6574	3.3877	2.48811	3.3106	2.9652
2.4	3.23916	3.98	3.866	3.17072	3.945	3.9114	2.90212	3.6581	3.386	2.49251	3.3082	2.9645
2.40333	3.24149	3.9847	3.8645	3.17542	3.9471	3.9132	2.90066	3.6573	3.3862	2.49198	3.308	2.9646
2.40667	3.23518	3.9809	3.8632	3.17344	3.9479	3.9108	2.89868	3.6554	3.3859	2.49565	3.3072	2.9647
2.41	3.24164	3.9813	3.8627	3.17072	3.9494	3.9112	2.89997	3.6559	3.3856	2.49261	3.3033	2.965
2.41333	3.24663	3.985	3.8617	3.17317	3.9487	3.911	2.89814	3.654	3.3826	2.49584	3.3053	2.9644
2.41667	3.2406	3.9883	3.8608	3.17885	3.9508	3.9105	2.89762	3.6541	3.3839	2.4979	3.3039	2.9629
2.42	3.24028	3.9863	3.8619	3.1773	3.9506	3.9069	2.89917	3.6526	3.3853	2.49397	3.3067	2.9616
2.42333	3.24381	3.9915	3.8606	3.17293	3.9476	3.9098	2.90022	3.6535	3.3867	2.50027	3.307	2.9611
2.42667	3.23852	3.9897	3.8601	3.1828	3.9497	3.9084	2.89889	3.6511	3.3864	2.49768	3.3062	2.9613
2.43	3.23523	3.9844	3.8583	3.1753	3.9496	3.9078	2.9037	3.6527	3.387	2.50286	3.3026	2.9623
2.43333	3.24482	3.9801	3.8594	3.17779	3.9477	3.9085	2.9009	3.651	3.3872	2.49747	3.3057	2.9633
2.43667	3.247	3.9777	3.8582	3.17373	3.9465	3.9091	2.89865	3.6515	3.3862	2.49698	3.3027	2.9645
2.44	3.24076	3.9779	3.8589	3.17343	3.949	3.9085	2.89982	3.65	3.3827	2.50433	3.3035	2.9651
2.44333	3.24338	3.974	3.859	3.17817	3.9457	3.9091	2.89754	3.6504	3.3798	2.50193	3.308	2.9631
2.44667	3.23933	3.975	3.8602	3.17506	3.9454	3.9083	2.89825	3.6483	3.3805	2.50267	3.3092	2.9642
2.45	3.23844	3.9782	3.8606	3.17533	3.9419	3.9045	2.90307	3.6493	3.3804	2.50373	3.3086	2.9638
2.45333	3.23958	3.9763	3.8604	3.17673	3.9434	3.9045	2.9058	3.6469	3.3791	2.50093	3.3125	2.9629
2.45667	3.23775	3.9774	3.8615	3.17088	3.9418	3.9027	2.90029	3.6486	3.3798	2.49915	3.31	2.9627
2.46	3.23957	3.9821	3.86	3.17411	3.9416	3.901	2.90089	3.6477	3.3819	2.50351	3.3061	2.9646
2.46333	3.2352	3.9815	3.8589	3.17822	3.94	3.9014	2.89697	3.6473	3.3789	2.49883	3.3033	2.9615
2.46667	3.24257	3.984	3.858	3.17628	3.9417	3.9055	2.8999	3.6457	3.3776	2.50273	3.3025	2.961
2.47	3.24127	3.9857	3.8577	3.17378	3.9407	3.9045	2.90244	3.6468	3.3776	2.50068	3.2991	2.9605
2.47333	3.24207	3.9817	3.8559	3.17135	3.9409	3.9058	2.90165	3.6448	3.3801	2.50339	3.3039	2.9601
2.47667	3.24394	3.9762	3.8561	3.17726	3.9396	3.9062	2.90498	3.6454	3.3787	2.50574	3.3069	2.9591
2.48	3.24275	3.9762	3.8556	3.17994	3.9399	3.9051	2.90367	3.6467	3.3795	2.5044	3.3058	2.9618
2.48333	3.24005	3.9698	3.8558	3.17564	3.9383	3.9027	2.90598	3.6477	3.3803	2.51081	3.3056	2.9604
2.48667	3.24077	3.9652	3.8544	3.17287	3.9374	3.9058	2.90521	3.6487	3.3777	2.50465	3.3061	2.96
2.49	3.24011	3.9654	3.855	3.17996	3.9364	3.9025	2.90031	3.6478	3.3696	2.50463	3.3033	2.9601
2.49333	3.23485	3.964	3.855	3.17825	3.9356	3.9046	2.90181	3.6469	3.37	2.50313	3.2979	2.9596
2.49667	3.23913	3.965	3.8554	3.17525	3.9335	3.9023	2.90744	3.6471	3.3709	2.51012	3.3012	2.9578
2.5	3.24004	3.9712	3.8552	3.17393	3.9351	3.9052	2.90186	3.6457	3.3704	2.5045	3.2991	2.9597
2.50333	3.24304	3.9736	3.8566	3.17737	3.934	3.9009	2.90436	3.6436	3.3728	2.50901	3.2967	2.9592
2.50667	3.24477	3.9736	3.8551	3.17219	3.9331	3.9029	2.90905	3.6434	3.3778	2.50541	3.2976	2.9586
2.51	3.24169	3.9767	3.8537	3.1776	3.9331	3.8994	2.90428	3.6439	3.3773	2.50117	3.3013	2.96
2.51333	3.24041	3.9757	3.8526	3.16961	3.9361	3.9019	2.90338	3.6421	3.3762	2.51614	3.2987	2.9596
2.51667	3.24579	3.973	3.8527	3.17444	3.9315	3.8981	2.90482	3.6434	3.3729	2.51097	3.3006	2.9577
2.52	3.23797	3.9743	3.8511	3.17737	3.9331	3.8993	2.9127	3.6424	3.372	2.51489	3.2994	2.9592
2.52333	3.23895	3.9747	3.8499	3.17582	3.9327	3.8986	2.90342	3.641	3.3708	2.50682	3.2979	2.9581
2.52667	3.24001	3.9754	3.8487	3.17496	3.9328	3.8996	2.90965	3.6384	3.3685	2.51284	3.294	2.9572
2.53	3.2425	3.9742	3.8476	3.17503	3.9302	3.8991	2.90196	3.6378	3.3683	2.51817	3.2923	2.9561
2.53333	3.24176	3.9714	3.8458	3.16905	3.9318	3.8984	2.90474	3.6361	3.37	2.51487	3.2914	2.9564
2.53667	3.24071	3.9702	3.8459	3.17192	3.9307	3.8992	2.90912	3.6371	3.3677	2.51166	3.2934	2.9554
2.54	3.24132	3.9726	3.8469	3.17419	3.9275	3.8995	2.91039	3.6382	3.3651	2.5085	3.2928	2.956
2.54333	3.2346	3.9703	3.8482	3.18439	3.927	3.8997	2.90464	3.6392	3.3706	2.51316	3.2955	2.9543
2.54667	3.24056	3.9699	3.8495	3.17402	3.9272	3.8997	2.90645	3.6387	3.3679	2.51272	3.2998	2.9551
2.55	3.24212	3.9704	3.8495	3.17432	3.9295	3.8997	2.90303	3.6384	3.3658	2.5135	3.2992	2.9557
2.55333	3.23779	3.9679	3.8491	3.17503	3.9273	3.8975	2.9089	3.6371	3.366	2.52114	3.2995	2.9564
2.55667	3.23919	3.9667	3.8488	3.17757	3.9287	3.8963	2.90552	3.6359	3.3695	2.51337	3.2998	2.9553
2.56	3.2454	3.9662	3.8474	3.17618	3.9277	3.8962	2.90979	3.636	3.3642	2.51508	3.2951	2.9563
2.56333	3.24212	3.9661	3.8469	3.176	3.9273	3.8977	2.912	3.6346	3.3652	2.51939	3.2938	2.9549
2.56667	3.24411	3.962	3.8452	3.17397	3.9236	3.9004	2.90689	3.633	3.3644	2.51555	3.2905	2.9545
2.57	3.23975	3.9645	3.8442	3.17765	3.9265	3.9032	2.90889	3.6326	3.3659	2.51791	3.2851	2.9528
2.57333	3.2443	3.9627	3.8433	3.17665	3.9283	3.9016	2.91069	3.6327	3.3634	2.51197	3.2844	2.9536
2.57667	3.23805	3.9659	3.8435	3.17978	3.9278	3.9023	2.90805	3.6321	3.3637	2.5152	3.284	2.952
2.58	3.24022	3.9634	3.8419	3.17607	3.9278	3.8996	2.91368	3.6323	3.3641	2.52456	3.2809	2.9532
2.58333	3.23425	3.9661	3.8434	3.1806	3.9268	3.8986	2.90257	3.6302	3.3652	2.51373	3.2794	2.9523
2.58667	3.23625	3.9647	3.8432	3.1748	3.9242	3.8963	2.90547	3.6309	3.3662	2.51488	3.2832	2.9507
2.59	3.2356	3.9626	3.842	3.17564	3.9251	3.8999	2.90209	3.6301	3.3655	2.51686	3.2825	2.9509
2.59333	3.24217	3.9595	3.8414	3.17959	3.9259	3.8957	2.91052	3.6305	3.3636	2.51713	3.2832	2.9509
2.59667	3.24398	3.9612	3.8414	3.17602	3.9239	3.898	2.91028	3.6304	3.359	2.52234	3.2809	2.9514
2.6	3.2388	3.9605	3.84	3.17254	3.9252	3.8969	2.91777	3.6323	3.3591	2.52312	3.2823	2.9524
2.60333	3.2427	3.9587	3.8403	3.17127	3.9254	3.8977	2.90668	3.6305	3.3546	2.51887	3.28	2.9547
2.60667	3.24527	3.96	3.8396	3.17141	3.9226	3.8949	2.90896	3.6309	3.3538	2.51713	3.2795	2.9542
2.61	3.24327	3.9595	3.8386	3.17664	3.9223	3.8971	2.91135	3.6289	3.3545	2.52148	3.2771	2.9541
2.61333	3.23698	3.9593	3.8395	3.17161	3.9239	3.8942	2.90377	3.6289	3.3569	2.51641	3.2804	2.9518
2.61667	3.2401	3.9594	3.8393	3.1732	3.9203	3.8941	2.90325	3.6287	3.3551	2.52032	3.2798	2.9496
2.62	3.23661	3.961	3.8385	3.17076	3.9217	3.8936	2.91099	3.6294	3.3573	2.52539	3.2816	2.9473
2.62333	3.23737	3.9609	3.8396	3.17339	3.9196	3.8943	2.90546	3.6291	3.3559	2.52188	3.2802	2.9468
2.62667	3.24146	3.961	3.8407	3.1721	3.9199	3.8917	2.90843	3.6289	3.3572	2.51769	3.2805	2.9453
2.63	3.23806	3.9616	3.8378	3.17351	3.9228	3.8945	2.91052	3.6277	3.3572	2.51852	3.2783	2.9457
2.63333	3.24228	3.9629	3.8368	3.17822	3.9262	3.8945	2.91115	3.6263	3.3557	2.52022	3.2792	2.9463
2.63667	3.23898	3.9629	3.8365	3.17171	3.9244	3.8943	2.90209	3.6249	3.3566	2.52112	3.2751	2.9474
2.64	3.24364	3.9572	3.8356	3.1729	3.9252	3.8937	2.91046	3.6244	3.3589	2.52243	3.2743	2.9475
2.64333	3.2416	3.9634	3.8348	3.17793	3.9242	3.8963	2.90814	3.6236	3.3549	2.52488	3.2787	2.9486
2.64667	3.23654	3.9633	3.8365	3.17491	3.9217	3.8929	2.91311	3.624	3.3506	2.5218	3.2787	2.947
2.65	3.24428	3.9633	3.8365	3.17557	3.9212	3.8938	2.90598	3.6247	3.3545	2.51749	3.2759	2.9481
2.65333	3.24377	3.9619	3.8359	3.17646	3.9194	3.8923	2.9105	3.623	3.3515	2.51978	3.2795	2.9481
2.65667	3.24445	3.9691	3.8358	3.17613	3.9187	3.8944	2.91055	3.6209	3.349	2.52359	3.281	2.946
2.66	3.24153	3.961	3.8354	3.17506	3.9198	3.8925	2.91173	3.6213	3.3505	2.51746	3.2756	2.9455
2.66333	3.24542	3.958	3.8331	3.17789	3.9176	3.8933	2.90938	3.6197	3.3538	2.52427	3.2749	2.9471
2.66667	3.23993	3.9569	3.8337	3.1734	3.9167	3.8914	2.9082	3.6186	3.3494	2.52321	3.278	2.9452
2.67	3.23732	3.9535	3.8334	3.17282	3.9149	3.8914	2.91004	3.6189	3.3489	2.52525	3.2759	2.9434
2.67333	3.24044	3.9565	3.8328	3.17711	3.9166	3.89	2.91121	3.6205	3.3471	2.52622	3.2747	2.943
2.67667	3.23667	3.9622	3.8322	3.17521	3.9149	3.892	2.91161	3.6218	3.3448	2.52072	3.2805	2.9438
2.68	3.23953	3.9681	3.8328	3.17593	3.9144	3.8927	2.9111	3.6216	3.3473	2.52633	3.2826	2.9427
2.68333	3.24184	3.9703	3.8309	3.17318	3.9123	3.8943	2.90785	3.6228	3.3496	2.52549	3.2814	2.9424
2.68667	3.2444	3.9754	3.8299	3.17221	3.9143	3.894	2.91481	3.6229	3.3463	2.5337	3.2823	2.9431
2.69	3.23711	3.968	3.8294	3.17508	3.9136	3.8929	2.90842	3.6236	3.3468	2.52948	3.2826	2.9436
2.69333	3.23944	3.9641	3.828	3.17488	3.9123	3.8922	2.91444	3.6221	3.3499	2.5267	3.2752	2.9424
2.69667	3.24276	3.9584	3.828	3.17154	3.913	3.893	2.91386	3.622	3.3431	2.52522	3.2732	2.942
2.7	3.23461	3.9539	3.8277	3.17386	3.9133	3.8889	2.91197	3.6191	3.3414	2.52736	3.2724	2.9424
2.70333	3.23566	3.9575	3.8296	3.17289	3.9088	3.8893	2.91269	3.6187	3.3427	2.52768	3.2716	2.9428
2.70667	3.237	3.9606	3.8291	3.17494	3.9059	3.886	2.91093	3.6163	3.3424	2.5287	3.2715	2.9428
2.71	3.23817	3.9582	3.8301	3.16718	3.9049	3.8878	2.91019	3.6142	3.343	2.52856	3.2744	2.9423
2.71333	3.2362	3.9564	3.8308	3.1755	3.9029	3.8852	2.90765	3.6125	3.3437	2.5316	3.2724	2.9416
2.71667	3.24382	3.9547	3.8302	3.1753	3.9076	3.8882	2.9108	3.6132	3.3429	2.52751	3.2737	2.941
2.72	3.24043	3.9497	3.8283	3.16694	3.9089	3.8887	2.91311	3.6134	3.3407	2.5269	3.2747	2.9389
2.72333	3.24354	3.9504	3.8292	3.1714	3.9111	3.8916	2.91265	3.614	3.3405	2.52851	3.2718	2.9396
2.72667	3.244	3.9509	3.8272	3.17857	3.9151	3.8875	2.911	3.6143	3.3381	2.53131	3.2691	2.9388
2.73	3.24277	3.9542	3.8253	3.16895	3.9137	3.8884	2.90681	3.6143	3.3387	2.52809	3.2691	2.9399
2.73333	3.23754	3.9614	3.8274	3.17314	3.9101	3.8883	2.90814	3.6135	3.3387	2.52784	3.2683	2.9395
2.73667	3.23921	3.9569	3.8259	3.17157	3.9124	3.8889	2.91266	3.6119	3.3421	2.52603	3.2671	2.9396
2.74	3.24143	3.9535	3.8246	3.169	3.9132	3.8875	2.91215	3.612	3.3398	2.53117	3.2672	2.9385
2.74333	3.23467	3.9541	3.8253	3.17154	3.9084	3.89	2.91233	3.6118	3.3397	2.52552	3.268	2.9373
2.74667	3.24459	3.9496	3.8254	3.17392	3.9102	3.8872	2.91653	3.6121	3.3402	2.5297	3.2671	2.9361
2.75	3.23644	3.9455	3.8237	3.17345	3.9102	3.8855	2.90784	3.6108	3.3389	2.53443	3.2663	2.9362
2.75333	3.2399	3.9454	3.8244	3.17657	3.9083	3.8861	2.91321	3.6124	3.3367	2.52164	3.2663	2.9359
2.75667	3.23956	3.9438	3.8245	3.17384	3.9074	3.8864	2.91102	3.611	3.3375	2.52953	3.2653	2.9358
2.76	3.23781	3.9456	3.8229	3.16822	3.9084	3.8842	2.91354	3.6113	3.3321	2.53168	3.2655	2.9358
2.76333	3.23802	3.9514	3.8224	3.17355	3.9096	3.8875	2.91277	3.6105	3.3292	2.52503	3.2691	2.9345
2.76667	3.24101	3.9539	3.8222	3.17376	3.9078	3.8864	2.91685	3.6115	3.3301	2.52473	3.2672	2.9334
2.77	3.24512	3.9594	3.8211	3.17305	3.908	3.8849	2.91273	3.6089	3.3299	2.52995	3.2675	2.9318
2.77333	3.24032	3.9577	3.8199	3.16841	3.9054	3.8876	2.9109	3.6083	3.3285	2.5306	3.269	2.9301
2.77667	3.23712	3.9518	3.8189	3.17107	3.9051	3.8885	2.91194	3.6052	3.3331	2.53331	3.2647	2.9295
2.78	3.24372	3.9457	3.8188	3.17078	3.9053	3.887	2.91092	3.6059	3.3327	2.52816	3.2638	2.9297
2.78333	3.23443	3.9407	3.8171	3.16949	3.9048	3.8844	2.92042	3.6033	3.3319	2.53233	3.2634	2.9297
2.78667	3.24011	3.9363	3.8174	3.16977	3.9084	3.8841	2.91079	3.6052	3.3329	2.53124	3.257	2.9305
2.79	3.24617	3.9417	3.8171	3.17012	3.9069	3.8806	2.90856	3.6032	3.3339	2.53228	3.2567	2.9316
2.79333	3.23875	3.9469	3.8186	3.17003	3.9109	3.8812	2.91538	3.6039	3.33	2.52749	3.2586	2.9323
2.79667	3.23763	3.9507	3.8174	3.17261	3.9092	3.881	2.91039	3.6025	3.3278	2.53097	3.2536	2.9298
2.8	3.23625	3.9539	3.8179	3.16941	3.9104	3.8846	2.91093	3.6021	3.3281	2.53445	3.2521	2.9289
2.80333	3.23886	3.9559	3.818	3.16982	3.907	3.8818	2.91395	3.6002	3.324	2.53222	3.2545	2.9284
2.80667	3.24006	3.9552	3.8176	3.17275	3.9112	3.882	2.91425	3.6006	3.3244	2.52446	3.2536	2.9278
2.81	3.24001	3.9511	3.8157	3.17308	3.9054	3.88	2.91255	3.6003	3.3257	2.5282	3.2546	2.9278
2.81333	3.237	3.9496	3.8163	3.16891	3.9044	3.8802	2.91565	3.6014	3.3301	2.53493	3.2558	2.9305
2.81667	3.23093	3.9464	3.8159	3.17303	3.901	3.8789	2.90532	3.6016	3.3282	2.52979	3.2546	2.9306
2.82	3.2427	3.949	3.8152	3.17031	3.8993	3.8811	2.91391	3.6008	3.3308	2.53459	3.2549	2.9313
2.82333	3.23965	3.9483	3.8155	3.1736	3.8973	3.8781	2.91234	3.6001	3.33	2.5302	3.2534	2.9296
2.82667	3.24019	3.947	3.8146	3.1693	3.8953	3.8777	2.91503	3.6009	3.3307	2.52842	3.2515	2.9278
2.83	3.23766	3.9484	3.8138	3.17324	3.8958	3.8775	2.9118	3.5975	3.3261	2.53911	3.2499	2.9262
2.83333	3.23743	3.9468	3.814	3.17204	3.8987	3.8773	2.91258	3.5977	3.3237	2.53578	3.252	2.9254
2.83667	3.23753	3.9428	3.8134	3.16605	3.8985	3.8762	2.91541	3.5981	3.3198	2.53148	3.2496	2.9247
2.84	3.24075	3.9424	3.8136	3.17385	3.8976	3.8797	2.90918	3.5981	3.3197	2.53284	3.2512	2.9238
2.84333	3.23551	3.9426	3.8146	3.1671	3.8982	3.8782	2.91498	3.5954	3.3177	2.53207	3.2512	2.924
2.84667	3.23708	3.9403	3.8148	3.17227	3.8958	3.8787	2.91545	3.5966	3.3213	2.52791	3.2534	2.9229
2.85	3.23796	3.9403	3.8132	3.16471	3.8938	3.8816	2.91333	3.5964	3.3236	2.5257	3.2502	2.9233
2.85333	3.23665	3.9412	3.8114	3.17213	3.893	3.8825	2.90869	3.5962	3.3252	2.53035	3.2496	2.9226
2.85667	3.23873	3.9396	3.8104	3.16519	3.8932	3.8803	2.9124	3.5964	3.3241	2.53158	3.2455	2.9237
2.86	3.23449	3.9434	3.8102	3.17072	3.8939	3.8841	2.91325	3.5963	3.3252	2.53816	3.2445	2.9236
2.86333	3.23676	3.9383	3.8096	3.16932	3.8942	3.8806	2.9132	3.5949	3.3227	2.53041	3.2441	2.9249
2.86667	3.24179	3.9379	3.8091	3.17113	3.8931	3.8789	2.91107	3.5938	3.3206	2.53499	3.2469	2.9253
2.87	3.24126	3.9364	3.8109	3.16587	3.8996	3.88	2.91477	3.5923	3.3208	2.53612	3.2454	2.926
2.87333	3.2394	3.9353	3.8097	3.16979	3.8964	3.8808	2.91249	3.5912	3.3195	2.53374	3.244	2.9249
2.87667	3.23851	3.9304	3.81	3.17222	3.8976	3.8757	2.91373	3.5912	3.3188	2.53583	3.2446	2.9242
2.88	3.2416	3.9356	3.8097	3.1717	3.9002	3.8787	2.91457	3.5927	3.3164	2.53468	3.2464	2.9232
2.88333	3.23477	3.9376	3.8112	3.16676	3.8997	3.8758	2.90959	3.5932	3.3154	2.5349	3.2396	2.9211
2.88667	3.24063	3.9344	3.8104	3.16525	3.894	3.8742	2.92757	3.5932	3.3164	2.53242	3.2442	2.9177
2.89	3.23846	3.9357	3.8105	3.17263	3.896	3.8757	2.91305	3.5923	3.3166	2.53333	3.2451	2.9179
2.89333	3.24026	3.9435	3.8095	3.1659	3.8948	3.8782	2.91305	3.5915	3.3142	2.53234	3.2442	2.9169
2.89667	3.23759	3.9464	3.8092	3.1667	3.893	3.8758	2.91291	3.589	3.3167	2.52955	3.2421	2.9141
2.9	3.23357	3.9474	3.8081	3.16697	3.8934	3.8777	2.91236	3.5864	3.3188	2.53359	3.2465	2.9126
2.90333	3.23768	3.9514	3.8071	3.17009	3.894	3.8755	2.91255	3.5867	3.3154	2.53589	3.243	2.9137
2.90667	3.23664	3.9485	3.8059	3.16511	3.8923	3.8744	2.91498	3.587	3.3161	2.53699	3.2447	2.9125
2.91	3.23574	3.9444	3.8046	3.16628	3.889	3.8751	2.91402	3.5887	3.3148	2.53332	3.2462	2.9126
2.91333	3.23971	3.939	3.8042	3.16953	3.8867	3.8721	2.90864	3.5888	3.314	2.53534	3.2461	2.9139
2.91667	3.2368	3.9348	3.8024	3.16732	3.8842	3.8739	2.91185	3.5886	3.3128	2.53842	3.2461	2.9146
2.92	3.23602	3.9393	3.8036	3.16678	3.883	3.8716	2.91192	3.5875	3.3121	2.53739	3.2476	2.9139
2.92333	3.23944	3.9412	3.8044	3.1671	3.8841	3.8709	2.9116	3.5871	3.3096	2.53477	3.247	2.9137
2.92667	3.23595	3.9391	3.8046	3.167	3.8853	3.871	2.91508	3.5865	3.3087	2.53271	3.2477	2.9141
2.93	3.23691	3.9417	3.8032	3.17077	3.8856	3.8726	2.91651	3.5873	3.3088	2.53555	3.2454	2.9135
2.93333	3.24314	3.9411	3.8029	3.16525	3.887	3.8677	2.90699	3.5879	3.3063	2.52861	3.2453	2.9132
2.93667	3.23802	3.9361	3.8014	3.168	3.8853	3.8702	2.91022	3.5889	3.3065	2.53522	3.2417	2.9124
2.94	3.23035	3.9389	3.801	3.166	3.8837	3.8672	2.91283	3.5876	3.3049	2.53455	3.2424	2.9126
2.94333	3.23412	3.9393	3.8012	3.16785	3.8802	3.8654	2.9097	3.5856	3.3077	2.53769	3.2406	2.9131
2.94667	3.22972	3.9369	3.8009	3.16458	3.8797	3.8681	2.91545	3.5857	3.3061	2.54086	3.2404	2.9132
2.95	3.23534	3.9369	3.8002	3.16569	3.8783	3.8696	2.91628	3.5846	3.3034	2.53926	3.2396	2.9126
2.95333	3.23897	3.9329	3.7997	3.16727	3.8796	3.8704	2.91392	3.5847	3.3034	2.53325	3.2422	2.913
2.95667	3.23103	3.9276	3.7993	3.16665	3.8816	3.869	2.91512	3.5842	3.3025	2.53158	3.2374	2.9125
2.96	3.23485	3.9255	3.7986	3.1655	3.8815	3.8682	2.91295	3.5849	3.3022	2.53382	3.2344	2.9112
2.96333	3.23839	3.9215	3.7981	3.16969	3.8794	3.8673	2.91363	3.582	3.3039	2.53154	3.2334	2.9097
2.96667	3.23753	3.9237	3.7987	3.16525	3.8788	3.8658	2.91218	3.5827	3.3053	2.53135	3.2303	2.9095
2.97	3.23681	3.9238	3.7974	3.16608	3.8767	3.8656	2.91409	3.5799	3.3036	2.53692	3.2267	2.9095
2.97333	3.23507	3.9274	3.7959	3.16523	3.8733	3.868	2.91593	3.5794	3.3054	2.53617	3.2279	2.9085
2.97667	3.23411	3.9311	3.7953	3.16377	3.8747	3.8675	2.91253	3.5782	3.3047	2.53362	3.2264	2.9073
2.98	3.23804	3.9381	3.7946	3.16521	3.8764	3.8646	2.9165	3.5796	3.3028	2.53067	3.2236	2.907
2.98333	3.23716	3.9357	3.7957	3.16362	3.8732	3.8669	2.91727	3.5782	3.303	2.53149	3.2257	2.9062
2.98667	3.23433	3.9376	3.7963	3.16483	3.8739	3.8655	2.9051	3.5789	3.3041	2.54025	3.2266	2.9057
2.99	3.23446	3.9296	3.796	3.16084	3.8718	3.8669	2.91542	3.5787	3.3042	2.53171	3.2263	2.9043
2.99333	3.23969	3.9267	3.7954	3.16632	3.8728	3.8668	2.91419	3.5799	3.3046	2.5339	3.2261	2.9045
2.99667	3.23712	3.9226	3.7957	3.17034	3.8708	3.8679	2.91403	3.5789	3.3006	2.53626	3.2279	2.9048
3	3.23453	3.9244	3.7937	3.16282	3.8748	3.866	2.91757	3.5792	3.3003	2.53648	3.226	2.9056
3.00333	3.23216	3.9251	3.7919	3.16378	3.875	3.8671	2.91503	3.5787	3.2995	2.53562	3.226	2.9046
3.00667	3.22885	3.9224	3.7924	3.16512	3.8791	3.8646	2.91792	3.5778	3.2991	2.53645	3.2245	2.9049
3.01	3.23316	3.9257	3.7929	3.16321	3.8757	3.8628	2.91117	3.575	3.2947	2.5298	3.2273	2.9043
3.01333	3.23599	3.9309	3.7933	3.16277	3.8797	3.8633	2.90784	3.5743	3.2947	2.53701	3.2262	2.9038
3.01667	3.23526	3.9313	3.7931	3.16546	3.8738	3.8634	2.91838	3.5723	3.2923	2.53684	3.2286	2.9021
3.02	3.23765	3.9279	3.7927	3.16147	3.8704	3.8634	2.91193	3.5719	3.2931	2.53785	3.2256	2.9032
3.02333	3.23249	3.9374	3.7922	3.16389	3.8685	3.8642	2.91836	3.5715	3.2912	2.53627	3.225	2.9038
3.02667	3.23046	3.9372	3.7905	3.16257	3.8697	3.8673	2.9135	3.5725	3.2937	2.53689	3.2203	2.9023
3.03	3.23986	3.9318	3.79	3.16218	3.8671	3.8665	2.9146	3.5713	3.296	2.53466	3.2204	2.903
3.03333	3.2381	3.9336	3.7898	3.17341	3.8692	3.8666	2.90957	3.5711	3.2971	2.53964	3.2185	2.9031
3.03667	3.23417	3.9353	3.7897	3.16457	3.8697	3.8639	2.91344	3.5716	3.2964	2.53857	3.2201	2.9019
3.04	3.23254	3.9326	3.7896	3.16742	3.8689	3.8641	2.9186	3.5727	3.2954	2.5378	3.2217	2.9022
3.04333	3.23671	3.9301	3.7905	3.16193	3.869	3.8617	2.91318	3.5718	3.2934	2.53485	3.2254	2.9016
3.04667	3.23786	3.9289	3.7881	3.1572	3.8673	3.8635	2.91052	3.5721	3.2892	2.53248	3.2261	2.898
3.05	3.23133	3.9278	3.7881	3.16285	3.8678	3.8624	2.90771	3.5714	3.2914	2.53229	3.2242	2.8977
3.05333	3.23251	3.9284	3.7878	3.16113	3.867	3.8645	2.91357	3.5709	3.2897	2.531	3.2245	2.8956
3.05667	3.23116	3.9247	3.7873	3.16583	3.864	3.8624	2.91758	3.5689	3.2886	2.5378	3.2238	2.8935
3.06	3.23768	3.9212	3.7861	3.16172	3.8636	3.8648	2.90802	3.569	3.2883	2.53619	3.2227	2.894
3.06333	3.23216	3.921	3.7867	3.16118	3.8646	3.8614	2.9073	3.5683	3.2905	2.53507	3.2207	2.8961
3.06667	3.23211	3.9215	3.7868	3.16224	3.8619	3.865	2.91021	3.5681	3.2876	2.53155	3.2221	2.8953
3.07	3.23828	3.919	3.7873	3.1591	3.8604	3.8648	2.91587	3.5654	3.2862	2.53241	3.2187	2.896
3.07333	3.23119	3.9218	3.7862	3.15646	3.8623	3.8668	2.91615	3.5662	3.2898	2.53063	3.2196	2.8956
3.07667	3.23133	3.9212	3.7867	3.15931	3.8596	3.8627	2.91256	3.5659	3.2895	2.53539	3.2171	2.8936
3.08	3.23484	3.9202	3.7858	3.15759	3.8567	3.8652	2.91494	3.5664	3.2903	2.53379	3.2147	2.8933
3.08333	3.23527	3.9149	3.7855	3.16298	3.8564	3.8623	2.91003	3.5663	3.2891	2.53564	3.2129	2.8919
3.08667	3.23447	3.9172	3.7858	3.16267	3.8587	3.8624	2.90727	3.5663	3.2916	2.53727	3.2163	2.8901
3.09	3.23658	3.916	3.7855	3.15867	3.8589	3.863	2.91231	3.5657	3.2879	2.53787	3.2152	2.8889
3.09333	3.22753	3.9165	3.785	3.16237	3.8601	3.8679	2.90941	3.5647	3.2841	2.53789	3.2149	2.8897
3.09667	3.23229	3.9188	3.7859	3.15914	3.8594	3.8643	2.90871	3.5638	3.283	2.52835	3.2145	2.888
3.1	3.23214	3.9205	3.7843	3.16029	3.8603	3.8648	2.90949	3.5641	3.2867	2.53108	3.2127	2.8887
3.10333	3.23195	3.9194	3.7842	3.16056	3.8573	3.8635	2.90847	3.5649	3.2852	2.53113	3.2103	2.8888
3.10667	3.23411	3.9207	3.7847	3.16014	3.8584	3.8629	2.91298	3.5644	3.2865	2.53518	3.2071	2.8902
3.11	3.22908	3.923	3.7843	3.15992	3.858	3.8627	2.90797	3.5651	3.2881	2.53172	3.2076	2.8887
3.11333	3.23481	3.9208	3.7841	3.15656	3.8611	3.8644	2.91292	3.5651	3.2858	2.53349	3.2054	2.8875
3.11667	3.22794	3.9198	3.7845	3.15393	3.8628	3.8637	2.9162	3.5646	3.2828	2.53382	3.2064	2.886
3.12	3.2323	3.9183	3.7838	3.15392	3.8641	3.8636	2.90909	3.5633	3.2788	2.52969	3.2029	2.8853
3.12333	3.23655	3.9201	3.7829	3.15977	3.8627	3.863	2.91011	3.5634	3.276	2.53545	3.2042	2.8835
3.12667	3.23242	3.921	3.7827	3.16183	3.8623	3.8604	2.91722	3.5619	3.2773	2.53388	3.2017	2.8835
3.13	3.2306	3.9253	3.7806	3.15862	3.8611	3.8618	2.90819	3.5614	3.2772	2.5384	3.204	2.883
3.13333	3.23318	3.9262	3.779	3.1606	3.86	3.8605	2.91427	3.5609	3.276	2.53897	3.2047	2.8834
3.13667	3.22855	3.9259	3.7792	3.15989	3.8596	3.8614	2.91223	3.5613	3.2761	2.53495	3.2034	2.8825
3.14	3.23653	3.9239	3.779	3.15473	3.8589	3.8592	2.91387	3.5603	3.2745	2.53637	3.2022	2.8812
3.14333	3.23778	3.9228	3.7794	3.16329	3.8601	3.8561	2.91545	3.5604	3.2753	2.52751	3.2022	2.8819
3.14667	3.2286	3.9194	3.7802	3.15549	3.86	3.8547	2.91076	3.5597	3.2772	2.53892	3.2027	2.8821
3.15	3.2373	3.9199	3.7798	3.16024	3.8591	3.8596	2.91182	3.5602	3.2779	2.52599	3.1987	2.8825
3.15333	3.23231	3.9224	3.7792	3.15644	3.8584	3.8527	2.90901	3.5578	3.2794	2.53442	3.2018	2.8832
3.15667	3.23385	3.9224	3.7782	3.15867	3.8588	3.857	2.90928	3.5569	3.2787	2.53856	3.2002	2.8826
3.16	3.23452	3.9236	3.7764	3.16188	3.8587	3.8616	2.91395	3.555	3.2794	2.53042	3.1996	2.8811
3.16333	3.23351	3.9221	3.7739	3.15598	3.8571	3.8602	2.90805	3.5549	3.275	2.53132	3.1965	2.8796
3.16667	3.229	3.9227	3.7753	3.1586	3.8558	3.8578	2.91094	3.5534	3.2753	2.53683	3.1979	2.8786
3.17	3.22898	3.9217	3.7736	3.155	3.8587	3.8622	2.90956	3.554	3.2749	2.53326	3.1964	2.8772
3.17333	3.23279	3.9192	3.7741	3.15615	3.8593	3.8615	2.91052	3.5537	3.2753	2.53293	3.1981	2.8778
3.17667	3.22798	3.9144	3.7732	3.15697	3.8595	3.8598	2.90998	3.5521	3.2694	2.53192	3.198	2.8769
3.18	3.23065	3.9126	3.7755	3.15928	3.8596	3.8624	2.90887	3.5527	3.2692	2.5315	3.197	2.8758
3.18333	3.22861	3.9109	3.7761	3.1587	3.861	3.8591	2.91235	3.5535	3.2654	2.53324	3.1947	2.8738
3.18667	3.23772	3.9095	3.777	3.15718	3.8607	3.8606	2.90967	3.5538	3.2626	2.53501	3.1944	2.8739
3.19	3.23246	3.9107	3.7755	3.1577	3.8626	3.8564	2.91044	3.5543	3.2628	2.52785	3.194	2.8726
3.19333	3.22606	3.914	3.777	3.15648	3.8616	3.8573	2.91086	3.5542	3.2638	2.5378	3.1936	2.8744
3.19667	3.23045	3.9123	3.776	3.16097	3.8604	3.8545	2.90738	3.5527	3.2676	2.53322	3.1953	2.8744
3.2	3.22256	3.9084	3.7735	3.15549	3.8595	3.8582	2.90279	3.55	3.2689	2.53434	3.1967	2.8749
3.20333	3.23304	3.9064	3.7726	3.15921	3.8578	3.8571	2.90458	3.5491	3.2693	2.52903	3.1953	2.8747
3.20667	3.22976	3.9075	3.7732	3.15512	3.8543	3.8581	2.90553	3.5483	3.2716	2.53482	3.195	2.8749
3.21	3.2261	3.9043	3.7729	3.16327	3.8549	3.8585	2.9094	3.55	3.2722	2.52954	3.1946	2.8732
3.21333	3.2331	3.9085	3.7721	3.15961	3.8565	3.8587	2.90761	3.5477	3.2694	2.53892	3.1954	2.8744
3.21667	3.22889	3.9096	3.7725	3.15413	3.8571	3.8567	2.90753	3.5479	3.2703	2.53286	3.1939	2.8739
3.22	3.22986	3.9114	3.7725	3.15588	3.8567	3.8569	2.9111	3.5478	3.2699	2.5333	3.1952	2.8731
3.22333	3.22788	3.9073	3.7724	3.16085	3.8574	3.8559	2.90392	3.5469	3.2698	2.53094	3.1918	2.8736
3.22667	3.23	3.9068	3.7712	3.15457	3.8563	3.8549	2.90996	3.5459	3.2679	2.52917	3.1926	2.872
3.23	3.23371	3.9067	3.77	3.15658	3.8556	3.8532	2.90401	3.5474	3.267	2.53516	3.1889	2.8698
3.23333	3.22772	3.9078	3.7699	3.15794	3.8555	3.849	2.90657	3.5485	3.2643	2.53149	3.1903	2.8699
3.23667	3.22672	3.9044	3.7689	3.15956	3.854	3.849	2.90496	3.5491	3.2664	2.5286	3.1868	2.8695
3.24	3.22605	3.906	3.7682	3.15846	3.8531	3.8507	2.89952	3.5484	3.2652	2.52662	3.1874	2.8683
3.24333	3.22856	3.9061	3.7686	3.15362	3.8513	3.8475	2.90164	3.548	3.2638	2.53202	3.1829	2.869
3.24667	3.22563	3.9059	3.7701	3.15192	3.8514	3.8465	2.90444	3.5466	3.2622	2.53452	3.1869	2.8697
3.25	3.22812	3.9087	3.7692	3.15897	3.8492	3.8509	2.90985	3.5456	3.261	2.53038	3.1836	2.8681
3.25333	3.22896	3.9095	3.7692	3.15277	3.8501	3.8499	2.9031	3.5435	3.2629	2.53381	3.1844	2.8687
3.25667	3.2317	3.904	3.767	3.15025	3.8506	3.848	2.90811	3.545	3.2589	2.53455	3.1823	2.8692
3.26	3.22955	3.9013	3.7665	3.15427	3.8514	3.8504	2.91046	3.5449	3.2609	2.53193	3.1858	2.8686
3.26333	3.22341	3.905	3.764	3.15628	3.8496	3.8518	2.90903	3.5446	3.26	2.52674	3.1809	2.868
3.26667	3.22717	3.9005	3.7631	3.15378	3.8509	3.8508	2.91202	3.5436	3.259	2.53	3.1836	2.8676
3.27	3.2214	3.9015	3.7633	3.15129	3.8488	3.8499	2.9068	3.5431	3.2535	2.52777	3.1815	2.8672
3.27333	3.23385	3.9045	3.7637	3.15158	3.8458	3.85	2.91199	3.5413	3.2549	2.5256	3.1855	2.8667
3.27667	3.22418	3.9061	3.7628	3.15156	3.8445	3.8507	2.90896	3.5416	3.2527	2.52279	3.1841	2.8666
3.28	3.22819	3.903	3.7624	3.15293	3.8461	3.8512	2.90985	3.54	3.2536	2.5306	3.1863	2.865
3.28333	3.22414	3.9038	3.7631	3.15345	3.8463	3.8502	2.90838	3.5397	3.2537	2.5259	3.1821	2.8638
3.28667	3.22462	3.9037	3.7622	3.15549	3.845	3.8502	2.90674	3.5395	3.257	2.53189	3.1847	2.8621
3.29	3.22206	3.9076	3.7622	3.15002	3.8457	3.8496	2.90627	3.5398	3.2572	2.5298	3.1824	2.8611
3.29333	3.22204	3.912	3.7613	3.15292	3.8464	3.8444	2.90571	3.538	3.2569	2.53247	3.1817	2.8601
3.29667	3.22387	3.9123	3.762	3.1511	3.8441	3.8446	2.91284	3.5381	3.2527	2.5346	3.1806	2.8592
3.3	3.22463	3.9129	3.7599	3.15269	3.8456	3.8407	2.90736	3.5373	3.2543	2.52646	3.1815	2.8599
3.30333	3.22618	3.9089	3.7595	3.15384	3.8451	3.8431	2.9047	3.5384	3.2514	2.53227	3.1804	2.8595
3.30667	3.22614	3.903	3.76	3.15136	3.8427	3.8415	2.90458	3.5364	3.2524	2.52505	3.1767	2.8588
3.31	3.2252	3.8998	3.7594	3.14776	3.8463	3.8446	2.90623	3.5367	3.254	2.52814	3.1769	2.8578
3.31333	3.22926	3.901	3.7583	3.14531	3.8442	3.8432	2.90551	3.5389	3.2579	2.53207	3.1754	2.858
3.31667	3.22323	3.899	3.7587	3.1506	3.8411	3.8468	2.90297	3.5383	3.2543	2.53009	3.1748	2.8577
3.32	3.22121	3.9067	3.7588	3.15317	3.8436	3.8451	2.91002	3.5364	3.2545	2.52419	3.1767	2.8572
3.32333	3.22625	3.9112	3.7587	3.14975	3.8452	3.8453	2.9083	3.5374	3.253	2.52788	3.1792	2.857
3.32667	3.22199	3.9089	3.7586	3.15531	3.8417	3.8451	2.90701	3.5364	3.2535	2.52201	3.1809	2.8579
3.33	3.22588	3.9053	3.7592	3.14886	3.8445	3.8442	2.90851	3.5357	3.2533	2.53276	3.1778	2.857
3.33333	3.22135	3.903	3.7586	3.1506	3.8441	3.8432	2.90605	3.536	3.252	2.52367	3.1794	2.857
3.33667	3.22624	3.8978	3.758	3.14755	3.8453	3.8432	2.90323	3.5356	3.2527	2.52362	3.1771	2.8558
3.34	3.22401	3.8978	3.7558	3.15031	3.8437	3.8442	2.90051	3.5341	3.252	2.52772	3.1775	2.8559
3.34333	3.22689	3.8946	3.7556	3.14791	3.8409	3.8443	2.90201	3.5331	3.2486	2.53332	3.1738	2.8534
3.34667	3.23284	3.8941	3.7546	3.14748	3.8412	3.8447	2.90164	3.5332	3.247	2.51824	3.1776	2.8539
3.35	3.22598	3.9004	3.7545	3.14863	3.8407	3.8452	2.90123	3.5299	3.2472	2.53013	3.1768	2.8521
3.35333	3.22466	3.9007	3.754	3.14671	3.8383	3.8443	2.90334	3.5316	3.2453	2.53112	3.1753	2.8523
3.35667	3.22618	3.9	3.7549	3.14905	3.838	3.8448	2.90133	3.5299	3.2419	2.52773	3.1721	2.8495
3.36	3.22784	3.9043	3.753	3.14705	3.8404	3.8459	2.90719	3.531	3.2419	2.52796	3.1731	2.8516
3.36333	3.22203	3.9074	3.7537	3.14667	3.8361	3.845	2.90193	3.5288	3.2434	2.52739	3.1709	2.85
3.36667	3.22031	3.9047	3.7532	3.14862	3.8364	3.8462	2.90536	3.5315	3.247	2.52532	3.172	2.8497
3.37	3.22325	3.9068	3.7526	3.14414	3.8349	3.845	2.90261	3.5276	3.247	2.53062	3.1737	2.8495
3.37333	3.22413	3.9059	3.7529	3.15039	3.8353	3.8439	2.90129	3.528	3.2482	2.52541	3.1734	2.851
3.37667	3.22116	3.9036	3.7545	3.14981	3.8314	3.8391	2.91374	3.5268	3.2508	2.52897	3.1721	2.8489
3.38	3.22269	3.8967	3.7538	3.14561	3.834	3.8409	2.90136	3.5262	3.2484	2.52567	3.1718	2.8499
3.38333	3.22345	3.8963	3.7527	3.15033	3.8329	3.8385	2.90517	3.5273	3.2465	2.52657	3.1683	2.8501
3.38667	3.2267	3.8887	3.7532	3.14729	3.8344	3.8408	2.90449	3.5275	3.2466	2.52586	3.1672	2.8501
3.39	3.21971	3.8851	3.7522	3.1494	3.8337	3.8416	2.90565	3.5273	3.2456	2.53218	3.168	2.8506
3.39333	3.22091	3.884	3.7526	3.1516	3.8336	3.8448	2.90441	3.5254	3.2402	2.52451	3.1648	2.8488
3.39667	3.22305	3.8832	3.7515	3.1492	3.8302	3.8434	2.90243	3.5244	3.2375	2.52567	3.1665	2.8467
3.4	3.22231	3.8792	3.7521	3.14149	3.8305	3.8416	2.90402	3.5233	3.2366	2.5289	3.1676	2.8453
3.40333	3.21797	3.8823	3.7524	3.14554	3.8284	3.8393	2.90506	3.5238	3.236	2.52704	3.1646	2.8442
3.40667	3.21737	3.8839	3.7515	3.15138	3.8293	3.8394	2.90195	3.5227	3.2361	2.52002	3.1652	2.8426
3.41	3.21991	3.8892	3.749	3.15042	3.83	3.8391	2.90274	3.5228	3.2375	2.52735	3.1649	2.8433
3.41333	3.22439	3.8926	3.7492	3.14558	3.8314	3.8394	2.9074	3.5221	3.2388	2.52307	3.1626	2.844
3.41667	3.22358	3.8968	3.7475	3.14936	3.8289	3.8417	2.90228	3.5204	3.2388	2.52359	3.1612	2.8438
3.42	3.22498	3.8959	3.7459	3.14254	3.8283	3.8412	2.90079	3.5203	3.238	2.52613	3.1607	2.8441
3.42333	3.22104	3.895	3.7465	3.14795	3.8259	3.8395	2.89979	3.5217	3.2392	2.52596	3.1574	2.8433
3.42667	3.22204	3.8903	3.7474	3.14543	3.8255	3.8424	2.90181	3.5227	3.2402	2.5228	3.1605	2.8428
3.43	3.22057	3.8857	3.7459	3.14978	3.8246	3.8362	2.90734	3.5226	3.2378	2.52567	3.1557	2.8408
3.43333	3.22239	3.8829	3.7452	3.14445	3.8253	3.8415	2.90455	3.5236	3.2341	2.52892	3.1551	2.8423
3.43667	3.21914	3.8785	3.7452	3.14752	3.823	3.8393	2.89949	3.5213	3.2341	2.52156	3.156	2.8412
3.44	3.22456	3.8758	3.7449	3.14354	3.8212	3.8392	2.89866	3.5198	3.2311	2.52354	3.1609	2.8393
3.44333	3.2181	3.8718	3.7447	3.14712	3.8202	3.8382	2.89874	3.5193	3.2307	2.52507	3.159	2.8398
3.44667	3.22087	3.8735	3.7454	3.13932	3.8209	3.8447	2.90075	3.5203	3.2323	2.51488	3.161	2.8408
3.45	3.22206	3.8769	3.7463	3.13982	3.8206	3.8366	2.90363	3.5185	3.234	2.52495	3.1596	2.8375
3.45333	3.22546	3.8879	3.7452	3.14671	3.8232	3.8412	2.90213	3.5198	3.2343	2.52015	3.16	2.8368
3.45667	3.21845	3.8954	3.7444	3.1493	3.8234	3.8421	2.90017	3.5202	3.2322	2.52366	3.1553	2.8369
3.46	3.22298	3.9001	3.7443	3.14603	3.8235	3.8404	2.90321	3.5173	3.2322	2.51901	3.1554	2.8349
3.46333	3.22171	3.8976	3.7432	3.1442	3.8215	3.8384	2.90236	3.5165	3.2323	2.52279	3.1543	2.8321
3.46667	3.2175	3.8949	3.7426	3.13792	3.8214	3.841	2.90521	3.5164	3.2303	2.52327	3.1553	2.8331
3.47	3.22393	3.8887	3.742	3.14018	3.821	3.8378	2.90357	3.5146	3.2302	2.52706	3.1543	2.8313
3.47333	3.22205	3.8844	3.7423	3.1415	3.8215	3.8378	2.89759	3.5132	3.2327	2.52075	3.1564	2.8307
3.47667	3.22284	3.8857	3.7413	3.14264	3.8223	3.834	2.90242	3.5148	3.2303	2.52	3.1551	2.8321
3.48	3.21866	3.8844	3.7413	3.14527	3.8198	3.8371	2.90165	3.5139	3.226	2.51919	3.1568	2.8333
3.48333	3.21839	3.8854	3.7415	3.13859	3.8185	3.8339	2.90087	3.5148	3.2274	2.52007	3.1544	2.8334
3.48667	3.21814	3.8857	3.7423	3.1411	3.8178	3.8361	2.89484	3.5146	3.2254	2.52277	3.1538	2.8322
3.49	3.22187	3.8844	3.7426	3.14219	3.8172	3.8333	2.90244	3.5143	3.2245	2.51858	3.1507	2.8347
3.49333	3.21948	3.8806	3.7424	3.14062	3.8156	3.8362	2.89937	3.5132	3.2242	2.52121	3.1517	2.8332
3.49667	3.21953	3.8845	3.7415	3.14204	3.818	3.8339	2.90102	3.5117	3.2254	2.52529	3.15	2.8327
3.5	3.21672	3.8799	3.7406	3.14078	3.819	3.8353	2.89937	3.5098	3.2255	2.52533	3.1535	2.8322
3.50333	3.22197	3.878	3.74	3.13793	3.8189	3.8328	2.90184	3.5098	3.2233	2.52511	3.1523	2.8335
3.50667	3.21728	3.8755	3.7368	3.13679	3.8181	3.8349	2.89873	3.5084	3.2212	2.52264	3.1541	2.8292
3.51	3.21333	3.8726	3.737	3.14145	3.8187	3.8347	2.89868	3.5097	3.2225	2.52319	3.1522	2.8276
3.51333	3.21811	3.8707	3.7355	3.14165	3.819	3.834	2.89814	3.51	3.2232	2.52298	3.1508	2.8279
3.51667	3.21855	3.8705	3.7359	3.1413	3.8197	3.8339	2.9012	3.5092	3.2244	2.51913	3.1463	2.8275
3.52	3.21748	3.8671	3.7353	3.14056	3.8184	3.8346	2.9017	3.5099	3.226	2.51971	3.1482	2.827
3.52333	3.21373	3.8708	3.7366	3.13922	3.8179	3.8317	2.897	3.5108	3.2228	2.51747	3.1485	2.8287
3.52667	3.21821	3.8758	3.7343	3.14357	3.8188	3.8299	2.89866	3.5088	3.2193	2.51976	3.1485	2.8292
3.53	3.21006	3.8756	3.7358	3.13886	3.8161	3.831	2.8989	3.509	3.2195	2.52122	3.1454	2.8285
3.53333	3.21913	3.8767	3.7346	3.14081	3.8125	3.8328	2.89759	3.5103	3.2183	2.51873	3.1481	2.8285
3.53667	3.21667	3.8877	3.7342	3.13959	3.8137	3.8322	2.89684	3.5071	3.2193	2.51686	3.1456	2.8296
3.54	3.21647	3.8894	3.733	3.14264	3.815	3.8319	2.89023	3.5061	3.2208	2.52273	3.1444	2.8281
3.54333	3.21908	3.888	3.7327	3.13816	3.8129	3.8345	2.89931	3.5058	3.2234	2.51782	3.1439	2.8279
3.54667	3.21778	3.8881	3.7323	3.13423	3.8144	3.8317	2.89999	3.5047	3.223	2.52251	3.1471	2.8268
3.55	3.21696	3.8892	3.7334	3.1399	3.8158	3.8318	2.89875	3.5042	3.2205	2.52313	3.1426	2.8258
3.55333	3.22041	3.8814	3.7329	3.13721	3.8151	3.8322	2.89364	3.5046	3.2185	2.52531	3.1449	2.8241
3.55667	3.21982	3.8767	3.7338	3.13833	3.8152	3.8328	2.89872	3.5053	3.2181	2.51977	3.1438	2.8237
3.56	3.217	3.8756	3.7347	3.13898	3.8173	3.8299	2.89715	3.5045	3.2173	2.51343	3.1447	2.8235
3.56333	3.21548	3.875	3.7336	3.13766	3.817	3.833	2.89555	3.5052	3.2164	2.52366	3.1435	2.8237
3.56667	3.21766	3.8741	3.7324	3.13532	3.8179	3.8325	2.8967	3.5047	3.2149	2.52102	3.1463	2.8219
3.57	3.217	3.8745	3.7312	3.13786	3.8167	3.8339	2.89907	3.5049	3.2119	2.51577	3.1449	2.8215
3.57333	3.2165	3.8756	3.7298	3.13246	3.8168	3.8352	2.90088	3.5041	3.2127	2.52243	3.1455	2.8214
3.57667	3.21633	3.8795	3.7288	3.13971	3.8159	3.8329	2.89895	3.5044	3.2136	2.51658	3.1433	2.8203
3.58	3.21223	3.8818	3.7289	3.13217	3.8168	3.8336	2.8937	3.5043	3.2135	2.52011	3.1437	2.8211
3.58333	3.21296	3.8815	3.7278	3.13276	3.8163	3.8334	2.8932	3.5029	3.2146	2.51377	3.1425	2.8214
3.58667	3.21824	3.8848	3.7278	3.13362	3.8175	3.8323	2.89418	3.5025	3.2155	2.51888	3.1427	2.8208
3.59	3.21718	3.8843	3.7282	3.13693	3.8179	3.8319	2.89169	3.5024	3.2121	2.51649	3.1407	2.8209
3.59333	3.21683	3.8858	3.7291	3.13835	3.8159	3.834	2.89215	3.5022	3.2084	2.5165	3.14	2.8197
3.59667	3.21094	3.8876	3.7286	3.1386	3.817	3.8305	2.89691	3.5009	3.2062	2.51816	3.1392	2.8179
3.6	3.2169	3.8891	3.7291	3.13661	3.818	3.8308	2.89216	3.5014	3.2075	2.51668	3.1409	2.8167
3.60333	3.21845	3.8889	3.7294	3.14068	3.8165	3.8304	2.89401	3.4999	3.2053	2.51276	3.137	2.8159
3.60667	3.21579	3.8859	3.7284	3.13871	3.8142	3.8301	2.89355	3.4995	3.2079	2.51291	3.1364	2.8163
3.61	3.21368	3.8829	3.7274	3.13601	3.8141	3.8298	2.89388	3.5008	3.2103	2.51342	3.1365	2.8167
3.61333	3.21257	3.8831	3.7279	3.13767	3.8117	3.8279	2.89514	3.5002	3.2107	2.51258	3.1372	2.8168
3.61667	3.217	3.8805	3.7266	3.1335	3.8118	3.8275	2.89425	3.4986	3.2104	2.51687	3.1365	2.8169
3.62	3.21556	3.8795	3.7256	3.13952	3.8121	3.8281	2.89297	3.4986	3.2128	2.5204	3.1385	2.817
3.62333	3.21401	3.8853	3.7254	3.13263	3.8111	3.8283	2.89088	3.4984	3.2106	2.50998	3.139	2.8166
3.62667	3.21212	3.887	3.7248	3.13861	3.8115	3.8257	2.89281	3.4966	3.2071	2.51348	3.1388	2.8155
3.63	3.21477	3.8837	3.725	3.14045	3.8107	3.8286	2.88944	3.498	3.2044	2.50959	3.139	2.8141
3.63333	3.21275	3.886	3.7254	3.13	3.808	3.8256	2.89188	3.4971	3.2035	2.51539	3.1377	2.8131
3.63667	3.21053	3.8822	3.727	3.13641	3.8074	3.8254	2.89678	3.497	3.2036	2.51389	3.1365	2.8139
3.64	3.21237	3.8742	3.7258	3.13273	3.8083	3.822	2.89311	3.4979	3.2033	2.51071	3.1338	2.8114
3.64333	3.21641	3.8661	3.725	3.13613	3.8087	3.8261	2.88697	3.4969	3.206	2.5173	3.1312	2.8118
3.64667	3.21092	3.8658	3.7235	3.13017	3.8064	3.8244	2.89325	3.4955	3.2088	2.51575	3.1294	2.8119
3.65	3.20772	3.8629	3.7229	3.1313	3.8046	3.8234	2.8951	3.4951	3.2077	2.50705	3.1257	2.812
3.65333	3.2114	3.8652	3.7199	3.13238	3.8018	3.8193	2.88629	3.4953	3.2058	2.51454	3.1229	2.81
3.65667	3.20249	3.867	3.7201	3.12744	3.7985	3.8259	2.88832	3.4926	3.2091	2.5108	3.1232	2.8096
3.66	3.21346	3.8715	3.7201	3.13155	3.7959	3.8239	2.88921	3.4936	3.2055	2.51382	3.1256	2.8084
3.66333	3.2128	3.8723	3.7212	3.12655	3.7966	3.8243	2.89066	3.4916	3.2055	2.51543	3.122	2.8073
3.66667	3.21016	3.8708	3.7207	3.13245	3.7948	3.8267	2.88712	3.4916	3.2033	2.5056	3.1226	2.8065
3.67	3.21299	3.8659	3.7209	3.13221	3.7956	3.8283	2.89508	3.4935	3.201	2.515	3.1246	2.806
3.67333	3.21456	3.8655	3.7212	3.13112	3.795	3.8237	2.88513	3.4931	3.1982	2.51396	3.124	2.8076
3.67667	3.214	3.8595	3.7206	3.13196	3.7936	3.8242	2.88872	3.4926	3.2013	2.51364	3.1231	2.8056
3.68	3.21014	3.8546	3.718	3.13337	3.7928	3.8228	2.88795	3.4925	3.1989	2.51055	3.1256	2.8045
3.68333	3.20985	3.8559	3.7171	3.12669	3.7923	3.8203	2.89231	3.4947	3.1972	2.51226	3.1291	2.8047
3.68667	3.20827	3.8575	3.7169	3.13577	3.7901	3.8216	2.886	3.4906	3.1971	2.5091	3.1305	2.8029
3.69	3.20907	3.8582	3.7161	3.13109	3.7918	3.8222	2.88953	3.4917	3.1977	2.51062	3.13	2.8014
3.69333	3.21034	3.8648	3.7173	3.13113	3.7915	3.8229	2.89068	3.4908	3.1947	2.51146	3.1281	2.8016
3.69667	3.20971	3.866	3.7182	3.1304	3.7901	3.8243	2.88841	3.492	3.1937	2.50603	3.1274	2.8018
3.7	3.21366	3.8672	3.7192	3.12944	3.7903	3.8266	2.89179	3.4888	3.1967	2.50623	3.1252	2.8011
3.70333	3.2065	3.8714	3.7197	3.13312	3.7908	3.827	2.88618	3.49	3.2003	2.50728	3.1218	2.8012
3.70667	3.2099	3.8749	3.7196	3.12949	3.7873	3.8263	2.89118	3.4876	3.2005	2.50697	3.1223	2.8005
3.71	3.21086	3.8751	3.7184	3.13044	3.7871	3.8241	2.88942	3.4884	3.2023	2.50455	3.1186	2.8012
3.71333	3.21321	3.878	3.7182	3.12856	3.7861	3.8243	2.89653	3.4861	3.2029	2.50525	3.1188	2.8004
3.71667	3.212	3.8762	3.7172	3.13208	3.7843	3.8238	2.88724	3.4879	3.2019	2.50625	3.114	2.8002
3.72	3.20475	3.8763	3.7165	3.13108	3.7823	3.8232	2.8878	3.4867	3.2008	2.50982	3.1136	2.8002
3.72333	3.20701	3.8731	3.7152	3.13276	3.7825	3.8228	2.88912	3.4889	3.1978	2.51093	3.1102	2.7985
3.72667	3.20709	3.8725	3.7153	3.12665	3.7795	3.8223	2.8892	3.4855	3.1939	2.51493	3.113	2.798
3.73	3.20815	3.8739	3.7144	3.13192	3.78	3.8225	2.88814	3.4866	3.1944	2.50879	3.1147	2.7982
3.73333	3.20865	3.8719	3.7151	3.12936	3.7791	3.8213	2.89201	3.4844	3.1974	2.50693	3.1216	2.7968
3.73667	3.20398	3.864	3.7151	3.12405	3.7788	3.8218	2.88319	3.4866	3.1954	2.50777	3.1196	2.7972
3.74	3.21018	3.8605	3.7169	3.13047	3.777	3.8218	2.88991	3.4856	3.1961	2.50537	3.1214	2.7981
3.74333	3.2056	3.8602	3.7168	3.12359	3.7765	3.8226	2.88586	3.4858	3.1979	2.50694	3.1216	2.7972
3.74667	3.2096	3.8555	3.7168	3.13046	3.7755	3.8196	2.88699	3.4847	3.1962	2.50716	3.1151	2.7969
3.75	3.20793	3.8579	3.7155	3.12275	3.7769	3.82	2.88613	3.4844	3.1911	2.50928	3.109	2.7982
3.75333	3.20862	3.8633	3.7152	3.12454	3.7766	3.8168	2.88693	3.4818	3.1886	2.50797	3.1117	2.7966
3.75667	3.20632	3.8695	3.7136	3.12466	3.7763	3.8162	2.88475	3.4792	3.188	2.50759	3.1091	2.7958
3.76	3.20781	3.8688	3.7125	3.12593	3.7782	3.8161	2.89074	3.4812	3.1891	2.51015	3.1079	2.7961
3.76333	3.21027	3.8705	3.7121	3.12584	3.7771	3.8157	2.88475	3.4814	3.1883	2.50673	3.1093	2.7962
3.76667	3.20249	3.8748	3.7126	3.12785	3.7755	3.8147	2.88426	3.481	3.1881	2.51099	3.109	2.7932
3.77	3.2015	3.8736	3.7119	3.12716	3.7738	3.8173	2.88711	3.4801	3.1909	2.50266	3.1066	2.794
3.77333	3.20467	3.8725	3.7108	3.12341	3.7739	3.8174	2.88868	3.4827	3.1933	2.5075	3.1096	2.7934
3.77667	3.20578	3.8729	3.7116	3.1226	3.7716	3.8151	2.89407	3.4814	3.1912	2.51044	3.1111	2.7934
3.78	3.20409	3.8692	3.7102	3.12331	3.7728	3.8166	2.88006	3.4815	3.1915	2.50967	3.112	2.7927
3.78333	3.20715	3.8634	3.7091	3.12518	3.7737	3.8171	2.89213	3.4806	3.1913	2.50335	3.1114	2.7937
3.78667	3.20576	3.8695	3.7084	3.12837	3.7737	3.8152	2.88348	3.4812	3.1918	2.50175	3.1142	2.793
3.79	3.1989	3.8697	3.7095	3.13119	3.7733	3.8151	2.8848	3.4814	3.192	2.50895	3.1151	2.7929
3.79333	3.2068	3.869	3.7079	3.12783	3.7742	3.8168	2.88381	3.4808	3.1895	2.5062	3.1156	2.7916
3.79667	3.20033	3.8742	3.709	3.12476	3.7711	3.8173	2.88391	3.4792	3.1884	2.50002	3.116	2.7907
3.8	3.20396	3.8758	3.7077	3.12244	3.7706	3.8138	2.88582	3.4799	3.1892	2.50326	3.1161	2.7894
3.80333	3.20699	3.8669	3.7089	3.11872	3.7708	3.8142	2.88691	3.4777	3.1866	2.50625	3.1157	2.7896
3.80667	3.20668	3.8626	3.7092	3.12155	3.7722	3.8129	2.8931	3.4765	3.1828	2.50044	3.1147	2.7895
3.81	3.20211	3.8575	3.7094	3.12299	3.773	3.8114	2.88657	3.4758	3.1828	2.50158	3.1127	2.7897
3.81333	3.20148	3.8534	3.7091	3.12047	3.773	3.8105	2.88202	3.4761	3.1844	2.50204	3.1128	2.7896
3.81667	3.20233	3.8493	3.7088	3.12922	3.7699	3.8132	2.88412	3.4753	3.185	2.50708	3.1124	2.7888
3.82	3.20735	3.8494	3.7084	3.12098	3.7705	3.812	2.88241	3.4766	3.1859	2.50237	3.1104	2.7874
3.82333	3.20312	3.8504	3.7074	3.12293	3.7675	3.8114	2.88774	3.4759	3.1873	2.50187	3.1099	2.7855
3.82667	3.20861	3.8549	3.7063	3.12006	3.7663	3.8116	2.88034	3.4762	3.1885	2.50082	3.1096	2.7847
3.83	3.20251	3.8596	3.7043	3.12317	3.7669	3.8122	2.88616	3.4746	3.1881	2.4958	3.1082	2.7848
3.83333	3.19969	3.8643	3.7036	3.12321	3.7688	3.8112	2.87921	3.4758	3.1845	2.50519	3.1066	2.7854
3.83667	3.20119	3.8681	3.7017	3.11922	3.7669	3.8116	2.88171	3.4745	3.1833	2.49982	3.1066	2.7857
3.84	3.20266	3.8671	3.7008	3.12686	3.7686	3.8089	2.88624	3.4732	3.1836	2.49688	3.1052	2.7852
3.84333	3.1976	3.8618	3.7019	3.12545	3.7667	3.8092	2.88121	3.471	3.185	2.50288	3.1024	2.7835
3.84667	3.19887	3.8577	3.7033	3.1198	3.7685	3.8092	2.88193	3.4722	3.1831	2.49674	3.1026	2.7807
3.85	3.20411	3.8501	3.7045	3.12085	3.7676	3.8084	2.88021	3.4704	3.1812	2.50587	3.102	2.779
3.85333	3.20425	3.8436	3.7054	3.11859	3.7693	3.8086	2.88237	3.4701	3.1823	2.50405	3.1011	2.7774
3.85667	3.20765	3.8464	3.7047	3.11751	3.7687	3.8124	2.87951	3.4695	3.1809	2.49897	3.0984	2.7778
3.86	3.20523	3.8539	3.7022	3.11469	3.7685	3.8102	2.87892	3.4712	3.1776	2.50073	3.1016	2.779
3.86333	3.20454	3.8549	3.7009	3.11778	3.7678	3.8092	2.88301	3.4707	3.179	2.50111	3.1008	2.7797
3.86667	3.19982	3.8609	3.6998	3.11988	3.7683	3.8082	2.87924	3.4713	3.1816	2.50168	3.1015	2.781
3.87	3.19922	3.8674	3.6976	3.12196	3.7659	3.8086	2.8716	3.4721	3.1808	2.50022	3.1005	2.7822
3.87333	3.19784	3.869	3.6974	3.12009	3.7646	3.8069	2.88184	3.4718	3.1817	2.50159	3.0983	2.7817
3.87667	3.20392	3.8671	3.6985	3.11646	3.7659	3.8077	2.88211	3.4696	3.1814	2.49818	3.0977	2.7795
3.88	3.20329	3.8635	3.6988	3.11879	3.7659	3.8073	2.87524	3.469	3.1761	2.49465	3.0968	2.7786
3.88333	3.20353	3.8659	3.6992	3.11854	3.7659	3.8097	2.88403	3.4686	3.1734	2.50276	3.0951	2.7767
3.88667	3.20554	3.864	3.6995	3.11833	3.7675	3.8089	2.87955	3.4677	3.1697	2.49586	3.0936	2.7751
3.89	3.19775	3.8592	3.6997	3.12226	3.7674	3.8092	2.88094	3.4679	3.1692	2.4991	3.0952	2.776
3.89333	3.20011	3.8565	3.6999	3.12102	3.7665	3.8069	2.88289	3.4675	3.1694	2.49753	3.0925	2.7765
3.89667	3.20062	3.861	3.7004	3.12349	3.7639	3.8083	2.88402	3.4673	3.1714	2.50075	3.0916	2.7772
3.9	3.20248	3.855	3.6986	3.11483	3.7647	3.8063	2.88027	3.4661	3.1717	2.49777	3.0913	2.7776
3.90333	3.20046	3.8525	3.6987	3.11831	3.7624	3.8071	2.87775	3.4664	3.1724	2.50709	3.0922	2.7769
3.90667	3.20166	3.8549	3.6976	3.12085	3.7627	3.8072	2.87718	3.4646	3.1717	2.49633	3.0925	2.7757
3.91	3.1997	3.8562	3.698	3.11935	3.762	3.8087	2.87818	3.4665	3.1709	2.49818	3.0927	2.7765
3.91333	3.19788	3.8552	3.6965	3.11222	3.762	3.8062	2.88421	3.4664	3.1736	2.49487	3.0922	2.7755
3.91667	3.20058	3.8575	3.6984	3.11164	3.7613	3.8085	2.87949	3.4666	3.1748	2.49527	3.0945	2.7745
3.92	3.20166	3.8574	3.6978	3.11686	3.7627	3.805	2.88054	3.4662	3.1749	2.4937	3.0923	2.7743
3.92333	3.19585	3.8606	3.6989	3.12217	3.7645	3.8057	2.87895	3.4673	3.1736	2.49905	3.0908	2.7734
3.92667	3.19492	3.8594	3.6971	3.11314	3.7658	3.8066	2.88197	3.4668	3.1776	2.49865	3.091	2.7716
3.93	3.19692	3.8544	3.697	3.11454	3.7658	3.8089	2.88346	3.4663	3.1761	2.49502	3.0905	2.7709
3.93333	3.20117	3.8515	3.6955	3.11568	3.7628	3.8054	2.88154	3.4666	3.1727	2.49681	3.0919	2.77
3.93667	3.19473	3.8542	3.6968	3.11916	3.764	3.8083	2.87981	3.4661	3.1717	2.49646	3.0924	2.769
3.94	3.19503	3.8507	3.696	3.11246	3.7628	3.8081	2.87995	3.4639	3.1722	2.49482	3.0929	2.7682
3.94333	3.19905	3.8525	3.6964	3.12271	3.7634	3.808	2.87457	3.463	3.1683	2.49976	3.0899	2.7666
3.94667	3.19786	3.8541	3.6961	3.11797	3.7638	3.8059	2.87935	3.4639	3.1684	2.49222	3.0907	2.766
3.95	3.20309	3.8606	3.6954	3.11347	3.7654	3.807	2.87525	3.4631	3.1708	2.49909	3.0871	2.7663
3.95333	3.19957	3.8591	3.6944	3.11162	3.7635	3.804	2.87914	3.4625	3.1706	2.49238	3.0888	2.7669
3.95667	3.20531	3.859	3.6947	3.1112	3.7628	3.8043	2.87712	3.4653	3.1713	2.50156	3.0888	2.7668
3.96	3.19114	3.8531	3.6955	3.11485	3.7601	3.804	2.87885	3.4632	3.1718	2.49494	3.0892	2.768
3.96333	3.19771	3.8502	3.6947	3.11772	3.7601	3.8047	2.87561	3.4617	3.1702	2.49392	3.0901	2.7679
3.96667	3.1993	3.8442	3.6941	3.11613	3.7625	3.8019	2.8803	3.4617	3.1692	2.49936	3.0898	2.7689
3.97	3.19493	3.844	3.6933	3.10989	3.764	3.8043	2.87548	3.4621	3.1705	2.49555	3.089	2.768
3.97333	3.19555	3.8409	3.694	3.11482	3.7618	3.8036	2.8784	3.4609	3.168	2.49539	3.0901	2.7674
3.97667	3.19741	3.8457	3.6921	3.1111	3.7613	3.8055	2.87835	3.4591	3.1656	2.4972	3.0914	2.7673
3.98	3.19848	3.8493	3.6926	3.11732	3.7629	3.8057	2.87997	3.4592	3.1635	2.49223	3.0894	2.7656
3.98333	3.1921	3.8499	3.6936	3.11449	3.7607	3.8095	2.87576	3.4584	3.1613	2.49161	3.0877	2.7634
3.98667	3.19554	3.8491	3.6933	3.1114	3.7612	3.8056	2.8822	3.4566	3.1619	2.49333	3.0851	2.7628
3.99	3.19791	3.8545	3.6909	3.11067	3.7635	3.8035	2.88039	3.4555	3.1607	2.48519	3.0831	2.7635
3.99333	3.19445	3.8525	3.6913	3.11391	3.7663	3.8023	2.87988	3.4564	3.1598	2.49592	3.0828	2.7611
3.99667	3.19327	3.8477	3.6902	3.11017	3.7636	3.8024	2.8726	3.4556	3.1628	2.4934	3.0817	2.7604
4	3.20014	3.8449	3.6885	3.11297	3.7639	3.7982	2.87599	3.4555	3.1628	2.49108	3.08	2.7588
4.00333	3.19897	3.8398	3.6897	3.11138	3.7628	3.8008	2.87541	3.4555	3.1596	2.48941	3.0803	2.7585
4.00667	3.19284	3.8386	3.6909	3.11242	3.7639	3.8031	2.87386	3.4557	3.159	2.49249	3.078	2.7576
4.01	3.20091	3.8399	3.6912	3.10724	3.7617	3.8023	2.87204	3.4567	3.1589	2.49404	3.0777	2.7591
4.01333	3.19166	3.8458	3.6915	3.11436	3.7631	3.8017	2.87453	3.4557	3.1559	2.49114	3.0773	2.7607
4.01667	3.19815	3.8549	3.6907	3.1118	3.761	3.8042	2.87439	3.4531	3.1555	2.48895	3.0753	2.7617
4.02	3.19917	3.8583	3.6892	3.11521	3.7597	3.8033	2.87445	3.4526	3.1578	2.49318	3.0741	2.7614
4.02333	3.19398	3.8567	3.6877	3.10822	3.7579	3.8012	2.87003	3.4542	3.1564	2.49361	3.0752	2.7614
4.02667	3.19304	3.852	3.6863	3.10818	3.759	3.8016	2.86994	3.4545	3.1591	2.49099	3.0748	2.7611
4.03	3.19681	3.8467	3.6852	3.10962	3.7577	3.8011	2.87494	3.4551	3.1612	2.4904	3.074	2.7606
4.03333	3.19085	3.8419	3.685	3.11228	3.7587	3.8013	2.87094	3.4555	3.164	2.49491	3.0765	2.7607
4.03667	3.19141	3.8401	3.6852	3.10717	3.7611	3.8011	2.87587	3.4561	3.1586	2.48797	3.075	2.7606
4.04	3.19179	3.8355	3.6857	3.11279	3.7614	3.801	2.87319	3.4535	3.1588	2.486	3.074	2.7605
4.04333	3.19274	3.841	3.6844	3.10762	3.7606	3.7989	2.8701	3.4529	3.1583	2.48547	3.0705	2.76
4.04667	3.19526	3.8422	3.6844	3.10852	3.7601	3.7995	2.87253	3.4519	3.1587	2.4941	3.0719	2.7576
4.05	3.19064	3.8413	3.6865	3.10923	3.7611	3.798	2.87227	3.4518	3.1584	2.48906	3.0704	2.7575
4.05333	3.19371	3.8419	3.686	3.10776	3.7567	3.7981	2.87401	3.4516	3.1587	2.49229	3.0717	2.7569
4.05667	3.19465	3.8434	3.6862	3.10758	3.7556	3.7978	2.87388	3.4521	3.1584	2.48804	3.0716	2.7536
4.06	3.19382	3.8444	3.6878	3.10882	3.756	3.798	2.86533	3.4515	3.1576	2.48527	3.0731	2.7526
4.06333	3.19275	3.8447	3.6882	3.10654	3.7563	3.7951	2.87074	3.4501	3.1531	2.49027	3.071	2.7546
4.06667	3.19539	3.8472	3.687	3.10814	3.759	3.7972	2.86814	3.4508	3.1528	2.48812	3.071	2.7528
4.07	3.18946	3.8513	3.6874	3.10391	3.7586	3.7969	2.87004	3.4492	3.1556	2.48742	3.0708	2.7527
4.07333	3.1938	3.8548	3.6859	3.10458	3.7584	3.7968	2.86787	3.4497	3.1547	2.48607	3.0734	2.7524
4.07667	3.19153	3.8511	3.684	3.10438	3.7628	3.7977	2.86707	3.4488	3.1543	2.49128	3.0746	2.7524
4.08	3.19374	3.8491	3.6829	3.10514	3.7629	3.801	2.87016	3.4497	3.154	2.48753	3.0756	2.7514
4.08333	3.18988	3.8424	3.6819	3.10361	3.7585	3.7997	2.87009	3.4473	3.1518	2.48498	3.0757	2.752
4.08667	3.19336	3.8396	3.6814	3.10526	3.7604	3.7976	2.86951	3.4482	3.1515	2.48863	3.076	2.7515
4.09	3.18892	3.8384	3.6812	3.10367	3.7615	3.7961	2.86745	3.4445	3.1544	2.48479	3.074	2.7522
4.09333	3.18732	3.8356	3.6813	3.10451	3.7551	3.7924	2.87054	3.4452	3.1526	2.48849	3.0719	2.7523
4.09667	3.19166	3.8389	3.6814	3.09973	3.7561	3.7916	2.86239	3.4459	3.1519	2.48277	3.0714	2.7518
4.1	3.19439	3.8422	3.6807	3.10165	3.7573	3.7919	2.87634	3.4465	3.1516	2.48355	3.0733	2.7502
4.10333	3.19285	3.8434	3.6789	3.09958	3.7559	3.7949	2.87275	3.4444	3.1491	2.48367	3.0711	2.7497
4.10667	3.18828	3.8365	3.6789	3.10127	3.7532	3.7965	2.86805	3.446	3.1491	2.4829	3.0701	2.7484
4.11	3.19212	3.835	3.6788	3.10448	3.7566	3.8001	2.86682	3.4443	3.1476	2.48214	3.0715	2.7478
4.11333	3.18926	3.8319	3.6779	3.105	3.7545	3.8007	2.86843	3.443	3.1518	2.48304	3.0711	2.7469
4.11667	3.19276	3.828	3.6775	3.10255	3.7542	3.8001	2.86678	3.442	3.1513	2.48178	3.0694	2.7466
4.12	3.19672	3.8277	3.6781	3.10456	3.754	3.7987	2.8671	3.4431	3.1512	2.4861	3.0711	2.7456
4.12333	3.19413	3.8312	3.6785	3.10589	3.7558	3.801	2.86822	3.4413	3.1497	2.48631	3.0705	2.7463
4.12667	3.19061	3.8335	3.6783	3.10429	3.7518	3.7988	2.87174	3.4411	3.1483	2.4819	3.0685	2.7461
4.13	3.18664	3.8371	3.679	3.10475	3.751	3.7984	2.86896	3.4404	3.1449	2.48313	3.0641	2.7455
4.13333	3.18529	3.8395	3.6796	3.10352	3.7488	3.7979	2.86212	3.4405	3.1485	2.48577	3.0661	2.7453
4.13667	3.18809	3.836	3.6794	3.10992	3.7495	3.798	2.8686	3.437	3.1486	2.48805	3.064	2.7456
4.14	3.18881	3.8327	3.6784	3.10026	3.7487	3.7938	2.86595	3.4388	3.1443	2.48016	3.0643	2.7461
4.14333	3.18841	3.8294	3.6785	3.10129	3.7508	3.7967	2.87172	3.4388	3.146	2.48308	3.0641	2.7451
4.14667	3.1834	3.8238	3.6774	3.10428	3.7502	3.7952	2.86747	3.4385	3.1455	2.48055	3.0664	2.7452
4.15	3.19233	3.8226	3.6767	3.10076	3.751	3.7945	2.86889	3.4383	3.1412	2.48319	3.0629	2.7447
4.15333	3.19069	3.8251	3.676	3.09906	3.749	3.7928	2.86793	3.4399	3.1427	2.48132	3.0614	2.7422
4.15667	3.18897	3.8294	3.6749	3.104	3.7513	3.7968	2.86715	3.4397	3.1428	2.48188	3.061	2.7418
4.16	3.19124	3.8308	3.6741	3.10365	3.7495	3.7945	2.8652	3.4389	3.141	2.48218	3.0612	2.7415
4.16333	3.18766	3.8327	3.6754	3.09844	3.7509	3.796	2.86279	3.4388	3.1441	2.48427	3.0589	2.7412
4.16667	3.18896	3.8341	3.6757	3.09752	3.7482	3.7955	2.86605	3.4371	3.1436	2.48327	3.0587	2.7398
4.17	3.18487	3.8358	3.6773	3.10048	3.7504	3.7956	2.87119	3.4383	3.143	2.48076	3.0594	2.7421
4.17333	3.19022	3.8357	3.6764	3.09888	3.7473	3.791	2.87077	3.4376	3.1468	2.48059	3.0578	2.7415
4.17667	3.18803	3.8343	3.6763	3.10201	3.748	3.7937	2.86744	3.4388	3.1492	2.48128	3.0573	2.7418
4.18	3.18803	3.8323	3.6749	3.10096	3.7468	3.7928	2.86694	3.4393	3.1416	2.48025	3.0559	2.7409
4.18333	3.19575	3.8319	3.6733	3.10124	3.7473	3.7947	2.86545	3.4399	3.1406	2.48438	3.0567	2.7417
4.18667	3.19008	3.8306	3.671	3.0982	3.7458	3.7952	2.86621	3.4382	3.1406	2.47762	3.0566	2.7398
4.19	3.18769	3.832	3.6713	3.09702	3.7463	3.7954	2.86617	3.4372	3.1371	2.47956	3.0543	2.7397
4.19333	3.18883	3.8353	3.6702	3.10115	3.7448	3.7917	2.86483	3.4355	3.1361	2.48201	3.055	2.7381
4.19667	3.18641	3.8381	3.669	3.09652	3.7457	3.7899	2.86141	3.434	3.1395	2.48266	3.0557	2.739
4.2	3.18854	3.838	3.6692	3.10017	3.7455	3.7915	2.86585	3.4351	3.1393	2.48158	3.0564	2.7375
4.20333	3.19027	3.8367	3.6688	3.09896	3.7467	3.7918	2.86573	3.4358	3.1363	2.48853	3.057	2.7385
4.20667	3.18768	3.8277	3.669	3.09218	3.7468	3.7941	2.86259	3.4368	3.1367	2.47218	3.0618	2.7377
4.21	3.18741	3.8278	3.6692	3.10204	3.7469	3.7953	2.86161	3.4372	3.1318	2.48166	3.061	2.7372
4.21333	3.18734	3.8275	3.6693	3.09724	3.7459	3.7968	2.86264	3.4379	3.1328	2.48359	3.0621	2.7356
4.21667	3.18803	3.8293	3.6696	3.09423	3.7483	3.7942	2.8671	3.4359	3.1317	2.4838	3.0591	2.7362
4.22	3.18348	3.831	3.6694	3.09895	3.7462	3.7928	2.86312	3.4351	3.1321	2.47946	3.0585	2.7352
4.22333	3.18941	3.8387	3.6696	3.09499	3.7455	3.7898	2.86	3.4348	3.1307	2.4816	3.0553	2.7353
4.22667	3.18936	3.8388	3.6694	3.09428	3.7441	3.7893	2.86275	3.435	3.1358	2.47846	3.0536	2.736
4.23	3.18476	3.8391	3.6683	3.0987	3.7435	3.7894	2.86093	3.4352	3.1341	2.47375	3.0544	2.7361
4.23333	3.18436	3.8354	3.667	3.09294	3.7426	3.7884	2.85929	3.4365	3.1354	2.4726	3.0546	2.7359
4.23667	3.18508	3.8288	3.667	3.09583	3.742	3.7886	2.86637	3.4379	3.1351	2.47765	3.0526	2.735
4.24	3.18896	3.8244	3.6662	3.09225	3.7402	3.7906	2.86543	3.4362	3.1368	2.47902	3.0506	2.7334
4.24333	3.18081	3.822	3.6651	3.09261	3.7425	3.7862	2.86341	3.434	3.1373	2.47332	3.0498	2.7327
4.24667	3.18267	3.8189	3.6661	3.09307	3.7432	3.7875	2.86089	3.4312	3.1374	2.47373	3.0505	2.7329
4.25	3.18097	3.8193	3.6664	3.09705	3.7415	3.788	2.85968	3.4303	3.1348	2.47883	3.0511	2.7337
4.25333	3.17806	3.8226	3.6658	3.09335	3.7439	3.7876	2.86144	3.4289	3.1328	2.47845	3.0509	2.7333
4.25667	3.18158	3.8235	3.6644	3.09295	3.7449	3.7875	2.86687	3.4293	3.1319	2.4782	3.0507	2.7334
4.26	3.18461	3.8227	3.6649	3.08885	3.7422	3.7904	2.85837	3.4298	3.1298	2.47547	3.0529	2.7323
4.26333	3.18189	3.824	3.6651	3.08791	3.7398	3.7865	2.85987	3.4298	3.1276	2.47791	3.0504	2.7318
4.26667	3.18528	3.8234	3.6643	3.09586	3.7389	3.7877	2.86147	3.4299	3.1309	2.47525	3.0501	2.7304
4.27	3.18327	3.8255	3.6655	3.09388	3.7364	3.7887	2.85838	3.4291	3.1321	2.47889	3.0499	2.7312
4.27333	3.18657	3.8274	3.6679	3.09205	3.735	3.7901	2.85711	3.4298	3.1337	2.47372	3.0514	2.7304
4.27667	3.17668	3.83	3.6672	3.09519	3.7352	3.7911	2.8606	3.4292	3.1329	2.47811	3.0476	2.7305
4.28	3.18355	3.8259	3.6665	3.08996	3.7347	3.7907	2.85849	3.4289	3.1335	2.47694	3.0473	2.7276
4.28333	3.17644	3.8295	3.6666	3.08758	3.7342	3.7904	2.85662	3.429	3.1322	2.47648	3.0431	2.7273
4.28667	3.18554	3.8333	3.6651	3.09428	3.7335	3.7894	2.85756	3.4293	3.1323	2.47324	3.0442	2.7266
4.29	3.18332	3.8343	3.6644	3.0932	3.7346	3.7861	2.85899	3.4269	3.1313	2.46879	3.043	2.7257
4.29333	3.17834	3.8329	3.6647	3.09181	3.7338	3.7848	2.86063	3.4255	3.1299	2.47117	3.0435	2.7252
4.29667	3.17953	3.8378	3.6638	3.09161	3.7317	3.784	2.86092	3.4264	3.1261	2.47558	3.0435	2.7276
4.3	3.18387	3.8356	3.6641	3.0918	3.7313	3.7851	2.85714	3.4248	3.1244	2.47365	3.0448	2.7266
4.30333	3.18514	3.8275	3.6632	3.09138	3.7327	3.7852	2.85866	3.4247	3.1234	2.47258	3.0425	2.7272
4.30667	3.18094	3.8232	3.6615	3.09532	3.7297	3.7878	2.86213	3.4238	3.1219	2.46703	3.0436	2.7277
4.31	3.18092	3.8209	3.6607	3.08695	3.7307	3.7879	2.86211	3.4263	3.1225	2.47257	3.0439	2.7264
4.31333	3.17893	3.8175	3.6601	3.09298	3.7323	3.7895	2.86307	3.4245	3.1292	2.47441	3.0439	2.7246
4.31667	3.18176	3.8129	3.658	3.09017	3.7308	3.7857	2.85581	3.4237	3.127	2.46993	3.0438	2.723
4.32	3.18024	3.8179	3.6583	3.08822	3.729	3.785	2.85486	3.424	3.1264	2.47774	3.045	2.7207
4.32333	3.18119	3.8216	3.659	3.08883	3.7298	3.7843	2.85786	3.4244	3.123	2.46578	3.0449	2.7204
4.32667	3.1784	3.826	3.6591	3.08737	3.7275	3.7859	2.85575	3.4232	3.1246	2.4697	3.0456	2.7188
4.33	3.18313	3.8261	3.6599	3.08665	3.7272	3.7867	2.85574	3.4243	3.1239	2.47099	3.0448	2.7185
4.33333	3.18359	3.8288	3.6604	3.09232	3.7277	3.787	2.85293	3.4256	3.1277	2.46671	3.0448	2.7191
4.33667	3.18363	3.8271	3.6596	3.0859	3.7257	3.7869	2.85517	3.4244	3.126	2.46267	3.0438	2.7198
4.34	3.18068	3.8254	3.659	3.08684	3.723	3.7869	2.85569	3.4247	3.1287	2.47151	3.041	2.7195
4.34333	3.18057	3.8234	3.6575	3.08882	3.7247	3.7835	2.85767	3.425	3.1286	2.47146	3.0389	2.7223
4.34667	3.17796	3.8263	3.6559	3.0834	3.7233	3.7822	2.8561	3.4241	3.1244	2.47369	3.0376	2.7221
4.35	3.18172	3.8277	3.6567	3.08655	3.7234	3.783	2.85237	3.4217	3.1209	2.47226	3.0369	2.7223
4.35333	3.17709	3.8273	3.6568	3.08783	3.7226	3.7824	2.85914	3.4208	3.1226	2.47092	3.038	2.722
4.35667	3.18204	3.8277	3.6557	3.08474	3.7247	3.7794	2.85615	3.4213	3.1199	2.46918	3.0354	2.7216
4.36	3.17935	3.8283	3.6555	3.09079	3.7226	3.7819	2.84933	3.4203	3.1149	2.46894	3.0365	2.719
4.36333	3.18085	3.8267	3.6569	3.0843	3.7217	3.7796	2.84818	3.4198	3.1132	2.46576	3.0356	2.7179
4.36667	3.17696	3.8239	3.6554	3.08872	3.7197	3.7805	2.85097	3.4192	3.1149	2.46923	3.0362	2.7171
4.37	3.17924	3.822	3.6551	3.08473	3.7212	3.7795	2.8554	3.4207	3.1141	2.46814	3.0324	2.7161
4.37333	3.17501	3.8176	3.6544	3.08678	3.721	3.7837	2.85161	3.4188	3.1146	2.46927	3.0341	2.7151
4.37667	3.17894	3.817	3.6556	3.0909	3.7213	3.7822	2.8565	3.418	3.115	2.467	3.0296	2.7179
4.38	3.1731	3.8203	3.6544	3.08835	3.7215	3.7845	2.85613	3.4175	3.1145	2.46781	3.0316	2.718
4.38333	3.17691	3.8211	3.6543	3.08426	3.7229	3.7803	2.85376	3.4196	3.1119	2.46693	3.0291	2.7174
4.38667	3.1743	3.8201	3.6523	3.08812	3.7218	3.7823	2.84978	3.4174	3.1123	2.46779	3.0291	2.7168
4.39	3.17412	3.8261	3.653	3.0842	3.7194	3.7766	2.8552	3.4178	3.1156	2.47237	3.0286	2.7193
4.39333	3.17929	3.826	3.6522	3.08404	3.7203	3.7777	2.86203	3.4174	3.1196	2.46669	3.032	2.7175
4.39667	3.1777	3.8213	3.6524	3.08745	3.7196	3.7762	2.85697	3.4194	3.1227	2.46941	3.0297	2.7189
4.4	3.17135	3.8235	3.6524	3.08687	3.7196	3.7791	2.8539	3.4156	3.1221	2.46968	3.0279	2.7182
4.40333	3.17765	3.8285	3.6526	3.0803	3.7202	3.7763	2.85467	3.4158	3.1207	2.465	3.0307	2.7177
4.40667	3.17626	3.8261	3.6525	3.08829	3.7205	3.7801	2.8573	3.4147	3.1176	2.46391	3.0318	2.7142
4.41	3.17606	3.8248	3.6519	3.08096	3.7189	3.7775	2.84904	3.4146	3.1118	2.45888	3.0309	2.7134
4.41333	3.17285	3.8291	3.6506	3.08789	3.7214	3.7812	2.84958	3.4131	3.1098	2.46592	3.032	2.7119
4.41667	3.17642	3.8295	3.649	3.08364	3.7187	3.7806	2.85472	3.4152	3.1105	2.46166	3.034	2.7114
4.42	3.17631	3.8283	3.6496	3.08381	3.7157	3.7807	2.85245	3.4152	3.1094	2.46528	3.0311	2.7112
4.42333	3.17684	3.8302	3.6501	3.08153	3.7149	3.7803	2.85467	3.4144	3.1086	2.45993	3.0303	2.7116
4.42667	3.17276	3.8296	3.6494	3.0828	3.716	3.78	2.84922	3.4126	3.1107	2.4679	3.0306	2.7103
4.43	3.16944	3.8228	3.6491	3.08272	3.7135	3.7747	2.85097	3.4125	3.1121	2.46643	3.0303	2.7097
4.43333	3.17225	3.8227	3.6492	3.08252	3.7153	3.7733	2.84746	3.413	3.1135	2.46534	3.0317	2.7111
4.43667	3.17615	3.8188	3.6492	3.08305	3.717	3.7748	2.85622	3.4127	3.1147	2.45745	3.0318	2.7124
4.44	3.17664	3.8149	3.648	3.08198	3.7195	3.7753	2.8484	3.4137	3.1113	2.46654	3.0339	2.7117
4.44333	3.17334	3.8127	3.6482	3.0836	3.7188	3.7773	2.85443	3.4161	3.1084	2.46136	3.0319	2.7127
4.44667	3.1668	3.8179	3.6482	3.08147	3.7194	3.7785	2.84788	3.4153	3.1087	2.4602	3.0317	2.7132
4.45	3.17587	3.8164	3.6492	3.0784	3.7184	3.7792	2.85002	3.4137	3.1103	2.46136	3.0287	2.7121
4.45333	3.16896	3.8146	3.6479	3.07887	3.7198	3.7775	2.85453	3.4131	3.111	2.45581	3.0284	2.7106
4.45667	3.17749	3.8125	3.6475	3.08044	3.7159	3.7738	2.85427	3.4129	3.1139	2.47133	3.0244	2.7111
4.46	3.16707	3.8114	3.6482	3.08434	3.7169	3.7735	2.84936	3.4113	3.1172	2.46379	3.0235	2.7104
4.46333	3.17577	3.8087	3.6479	3.08082	3.7143	3.7729	2.84964	3.4124	3.1149	2.46488	3.0201	2.7098
4.46667	3.16673	3.8048	3.6465	3.08246	3.7147	3.7737	2.85028	3.4114	3.1122	2.46932	3.0199	2.7082
4.47	3.17943	3.8063	3.6479	3.08117	3.712	3.7735	2.85019	3.4121	3.1102	2.46449	3.0183	2.7074
4.47333	3.1658	3.8036	3.648	3.08517	3.7158	3.7761	2.84984	3.4124	3.1124	2.457	3.0184	2.7053
4.47667	3.17137	3.8022	3.6465	3.07875	3.7137	3.7736	2.8526	3.4125	3.1122	2.46469	3.0175	2.7049
4.48	3.1721	3.8027	3.6455	3.08072	3.7163	3.7768	2.84859	3.4103	3.1128	2.46278	3.0191	2.7048
4.48333	3.17449	3.8056	3.6444	3.08212	3.7167	3.7751	2.85377	3.4095	3.1106	2.45993	3.0189	2.7049
4.48667	3.17045	3.8038	3.6433	3.07412	3.7167	3.7762	2.84689	3.4096	3.1117	2.46021	3.0213	2.7048
4.49	3.17169	3.8083	3.6419	3.08321	3.7177	3.7753	2.84376	3.4096	3.1108	2.46484	3.0223	2.7044
4.49333	3.16643	3.8107	3.6421	3.08522	3.7166	3.7769	2.84771	3.4085	3.1081	2.45306	3.0242	2.704
4.49667	3.16891	3.8089	3.6436	3.07507	3.7173	3.7724	2.84571	3.4066	3.1078	2.454	3.0251	2.7036
4.5	3.17167	3.8076	3.6454	3.07808	3.7172	3.7732	2.85242	3.4077	3.109	2.45578	3.0273	2.703
4.50333	3.16798	3.8136	3.6448	3.07766	3.7172	3.7743	2.84621	3.4059	3.1071	2.45869	3.0215	2.7035
4.50667	3.17238	3.8158	3.6437	3.08017	3.7117	3.7728	2.84461	3.4036	3.1035	2.45515	3.0184	2.705
4.51	3.16168	3.8183	3.6438	3.07837	3.7132	3.7743	2.85272	3.4052	3.1024	2.46123	3.0182	2.7047
4.51333	3.16477	3.8203	3.6417	3.07502	3.712	3.7779	2.85099	3.4069	3.1007	2.46112	3.0161	2.7035
4.51667	3.17212	3.8197	3.6404	3.07858	3.7124	3.7772	2.84504	3.4065	3.0988	2.45362	3.0113	2.7045
4.52	3.17069	3.8151	3.6404	3.07893	3.7136	3.7746	2.84704	3.4069	3.0975	2.45841	3.0159	2.7039
4.52333	3.1722	3.8109	3.6417	3.07794	3.7178	3.7759	2.84868	3.4059	3.0994	2.46066	3.0169	2.7023
4.52667	3.16792	3.8127	3.6403	3.0786	3.7167	3.7721	2.84348	3.4048	3.1026	2.46001	3.0146	2.7023
4.53	3.172	3.8122	3.6414	3.07475	3.7168	3.7722	2.84778	3.4062	3.104	2.45957	3.0148	2.7023
4.53333	3.16886	3.811	3.6418	3.07292	3.7138	3.7705	2.8483	3.4049	3.1058	2.45733	3.0171	2.7008
4.53667	3.17212	3.8088	3.6432	3.0752	3.714	3.7685	2.84687	3.4036	3.1042	2.45766	3.0166	2.6992
4.54	3.16674	3.8076	3.6419	3.07584	3.714	3.7682	2.8458	3.4043	3.1044	2.46188	3.0189	2.6995
4.54333	3.16566	3.8036	3.6418	3.07608	3.7132	3.7718	2.84698	3.4041	3.1026	2.46002	3.019	2.7003
4.54667	3.16442	3.8002	3.6414	3.08074	3.7133	3.7697	2.84571	3.4022	3.0998	2.45109	3.0199	2.6998
4.55	3.16393	3.7985	3.6414	3.07835	3.7141	3.7706	2.84973	3.4022	3.099	2.45745	3.0191	2.6988
4.55333	3.16374	3.7978	3.6384	3.07503	3.7137	3.7719	2.84189	3.4009	3.1013	2.45395	3.0156	2.6997
4.55667	3.16577	3.8006	3.6386	3.07278	3.7106	3.769	2.84241	3.4022	3.1024	2.45636	3.0112	2.6983
4.56	3.17156	3.8031	3.6381	3.07508	3.712	3.7673	2.84089	3.4013	3.102	2.45184	3.0101	2.6961
4.56333	3.16199	3.8031	3.6368	3.07191	3.7106	3.7676	2.8405	3.4013	3.1052	2.45179	3.0063	2.6949
4.56667	3.167	3.8081	3.6365	3.07061	3.7106	3.7676	2.84506	3.3999	3.1036	2.45885	3.0035	2.6969
4.57	3.1669	3.8122	3.6378	3.07594	3.7084	3.7695	2.84939	3.401	3.1015	2.45038	3.0037	2.697
4.57333	3.1719	3.8068	3.6381	3.07485	3.7095	3.7711	2.84099	3.3997	3.0975	2.4585	3.0034	2.696
4.57667	3.16743	3.8038	3.6376	3.07093	3.7087	3.7711	2.84047	3.3978	3.0952	2.45753	3.004	2.695
4.58	3.16255	3.8023	3.6366	3.07015	3.7099	3.768	2.84825	3.3974	3.0926	2.44952	3.0048	2.6944
4.58333	3.16434	3.8018	3.6368	3.06894	3.7096	3.7676	2.83797	3.3983	3.0925	2.45502	3.0044	2.6931
4.58667	3.16419	3.7964	3.6362	3.07716	3.7134	3.7675	2.83629	3.3983	3.095	2.45405	3.0036	2.6924
4.59	3.16777	3.7976	3.6351	3.07461	3.7124	3.7696	2.83955	3.3981	3.0956	2.45246	3.0058	2.6935
4.59333	3.16762	3.7952	3.6356	3.07466	3.7139	3.7647	2.84231	3.3981	3.0943	2.45218	3.0059	2.6931
4.59667	3.16829	3.798	3.6367	3.06866	3.7132	3.7687	2.83904	3.3976	3.0939	2.45319	3.0093	2.6951
4.6	3.16391	3.7947	3.6348	3.07402	3.7141	3.7684	2.8443	3.3985	3.0981	2.45153	3.0136	2.6939
4.60333	3.16538	3.7944	3.6348	3.06909	3.7109	3.7687	2.83781	3.3986	3.0947	2.45267	3.0138	2.6937
4.60667	3.16435	3.7946	3.6346	3.06592	3.7117	3.7657	2.84223	3.3991	3.096	2.45342	3.0119	2.6927
4.61	3.16508	3.7959	3.6344	3.07129	3.7096	3.7695	2.8432	3.4001	3.0976	2.445	3.0106	2.6917
4.61333	3.16666	3.7967	3.6338	3.06815	3.7092	3.7679	2.83872	3.3995	3.0987	2.45693	3.0076	2.6899
4.61667	3.16228	3.7961	3.6327	3.06569	3.7085	3.7696	2.84451	3.3986	3.0937	2.45129	3.0029	2.6897
4.62	3.16381	3.7994	3.6328	3.07022	3.7097	3.7671	2.83952	3.3966	3.0936	2.44832	3.0037	2.6867
4.62333	3.16277	3.8013	3.6333	3.0719	3.7084	3.7682	2.83791	3.3956	3.0929	2.44878	3.0053	2.6874
4.62667	3.16326	3.7996	3.6322	3.06633	3.7091	3.7654	2.8413	3.3926	3.0916	2.4434	3.0069	2.688
4.63	3.16305	3.7961	3.6319	3.07131	3.7078	3.7654	2.84607	3.3926	3.0898	2.44971	3.0077	2.6879
4.63333	3.15877	3.7964	3.6326	3.06772	3.7094	3.7618	2.83925	3.3902	3.0905	2.44645	3.0103	2.6875
4.63667	3.16694	3.7914	3.6317	3.06792	3.707	3.7646	2.84141	3.3915	3.0906	2.45304	3.0079	2.6885
4.64	3.16262	3.7886	3.6303	3.07108	3.7078	3.7629	2.83476	3.3917	3.0909	2.44677	3.0047	2.6882
4.64333	3.1659	3.7874	3.6297	3.07233	3.7066	3.7651	2.83537	3.3923	3.0905	2.44549	3.0042	2.6879
4.64667	3.16447	3.7922	3.6291	3.06763	3.7071	3.7612	2.83731	3.3912	3.0903	2.45254	3.0018	2.687
4.65	3.16469	3.7981	3.6286	3.06869	3.7039	3.7621	2.84063	3.3937	3.0896	2.44913	2.9989	2.6871
4.65333	3.16417	3.7989	3.6279	3.06914	3.7056	3.76	2.83745	3.3929	3.0901	2.44997	3.0045	2.6855
4.65667	3.16001	3.8021	3.6285	3.06775	3.7058	3.7649	2.83683	3.3911	3.0846	2.44684	3.0051	2.6837
4.66	3.16179	3.8055	3.6298	3.06833	3.7056	3.7655	2.83824	3.3926	3.084	2.44647	3.0031	2.6831
4.66333	3.15883	3.8015	3.63	3.06739	3.7048	3.7689	2.83395	3.3932	3.0836	2.44982	3.0001	2.6826
4.66667	3.16162	3.7958	3.6299	3.06966	3.7069	3.7695	2.83593	3.3922	3.0842	2.44951	3.0019	2.6814
4.67	3.16359	3.7976	3.6291	3.06017	3.7097	3.7672	2.8363	3.3913	3.0836	2.45372	2.9997	2.6822
4.67333	3.16373	3.795	3.6286	3.06718	3.7047	3.7636	2.84005	3.3911	3.0865	2.44347	3.0003	2.6812
4.67667	3.16945	3.794	3.629	3.06302	3.7094	3.7634	2.8337	3.3912	3.0909	2.44976	3.0009	2.682
4.68	3.1565	3.7931	3.6277	3.07165	3.7099	3.7646	2.83748	3.3901	3.0913	2.44766	3.0031	2.6818
4.68333	3.15758	3.7951	3.6274	3.06788	3.7087	3.7623	2.8378	3.3901	3.0919	2.44669	3.0026	2.6821
4.68667	3.15672	3.7937	3.6288	3.06603	3.7056	3.7664	2.83391	3.3897	3.0936	2.44836	2.9995	2.6816
4.69	3.16058	3.7931	3.629	3.06787	3.7088	3.7655	2.82974	3.3909	3.0932	2.44653	2.9972	2.6824
4.69333	3.15889	3.8	3.6281	3.06595	3.7034	3.7662	2.83588	3.3906	3.0898	2.44559	2.9956	2.6811
4.69667	3.16078	3.7997	3.6286	3.06513	3.7034	3.7651	2.83136	3.3921	3.0873	2.4425	2.9982	2.682
4.7	3.15792	3.7963	3.6284	3.06198	3.7042	3.7656	2.83132	3.3909	3.086	2.44278	2.9978	2.6815
4.70333	3.15505	3.7975	3.6268	3.06052	3.7055	3.7647	2.83083	3.3923	3.0873	2.44151	2.9943	2.6806
4.70667	3.16088	3.7953	3.6258	3.05646	3.7049	3.7663	2.83456	3.3919	3.0876	2.44537	2.9958	2.6808
4.71	3.15639	3.7856	3.6245	3.06591	3.7039	3.763	2.8364	3.3906	3.0869	2.44556	2.9939	2.6799
4.71333	3.1588	3.7849	3.624	3.0612	3.7005	3.7627	2.8335	3.3889	3.0913	2.44268	2.9905	2.6784
4.71667	3.1598	3.7886	3.6233	3.06457	3.6976	3.7643	2.83524	3.389	3.0875	2.44337	2.9905	2.6787
4.72	3.16152	3.7846	3.6224	3.06756	3.6963	3.7642	2.83169	3.3893	3.0832	2.44375	2.9957	2.6786
4.72333	3.16201	3.7846	3.6224	3.06684	3.6989	3.763	2.83755	3.3887	3.0821	2.43984	2.9943	2.6773
4.72667	3.15407	3.7856	3.622	3.0653	3.6997	3.7648	2.83767	3.3883	3.0811	2.4384	2.9969	2.677
4.73	3.15454	3.7851	3.6222	3.05962	3.7019	3.7616	2.83566	3.3887	3.077	2.44224	2.9973	2.6761
4.73333	3.15958	3.7814	3.6237	3.0612	3.7035	3.759	2.83126	3.3873	3.0772	2.43703	2.9964	2.6754
4.73667	3.15766	3.7845	3.6245	3.06193	3.702	3.7607	2.83041	3.3861	3.0749	2.44174	2.9941	2.676
4.74	3.15561	3.7866	3.6256	3.06092	3.7005	3.7607	2.83239	3.3857	3.0746	2.44568	2.9978	2.6766
4.74333	3.15672	3.7885	3.6263	3.05924	3.7011	3.7594	2.82785	3.386	3.0758	2.43937	2.9964	2.6775
4.74667	3.15274	3.7917	3.6253	3.06082	3.7014	3.7586	2.83046	3.3848	3.0771	2.43576	2.9968	2.6783
4.75	3.15347	3.7894	3.6242	3.06412	3.7013	3.7586	2.83234	3.386	3.0803	2.44598	2.9958	2.6769
4.75333	3.15792	3.7944	3.6228	3.05996	3.703	3.7546	2.83	3.3847	3.0826	2.43584	2.9941	2.6751
4.75667	3.1519	3.7993	3.6214	3.06093	3.7009	3.7524	2.83256	3.3842	3.0835	2.44173	2.9908	2.674
4.76	3.15865	3.7975	3.6207	3.05967	3.7022	3.7546	2.8318	3.3839	3.0837	2.4382	2.99	2.6731
4.76333	3.15286	3.794	3.6223	3.05963	3.7011	3.756	2.83071	3.3841	3.0831	2.44338	2.9887	2.6725
4.76667	3.15091	3.7941	3.6215	3.0632	3.6996	3.7556	2.82653	3.3831	3.0816	2.43975	2.9898	2.6732
4.77	3.15522	3.791	3.6217	3.05729	3.6965	3.7568	2.82747	3.3845	3.0812	2.44071	2.9886	2.673
4.77333	3.15214	3.7868	3.6212	3.05993	3.6966	3.7566	2.83157	3.3857	3.0776	2.43419	2.9886	2.6731
4.77667	3.1595	3.7869	3.6216	3.05561	3.6918	3.753	2.83039	3.3846	3.0736	2.44187	2.9857	2.674
4.78	3.15086	3.7908	3.6191	3.06267	3.6916	3.7552	2.83117	3.3849	3.0759	2.44193	2.9849	2.6735
4.78333	3.15868	3.7937	3.6197	3.05684	3.6896	3.7551	2.82803	3.3844	3.0769	2.44145	2.9817	2.6718
4.78667	3.15693	3.7885	3.6204	3.05984	3.692	3.7539	2.82409	3.3816	3.0759	2.43796	2.9823	2.672
4.79	3.15377	3.7862	3.6209	3.05838	3.6925	3.7523	2.83016	3.3814	3.079	2.43148	2.982	2.6711
4.79333	3.15698	3.7853	3.6195	3.0595	3.6948	3.7515	2.82974	3.3813	3.0838	2.4385	2.9846	2.6695
4.79667	3.14845	3.7838	3.62	3.05865	3.692	3.749	2.83094	3.3803	3.0789	2.43572	2.9839	2.6688
4.8	3.15666	3.7879	3.619	3.05986	3.6918	3.7483	2.82721	3.3796	3.0788	2.43759	2.9861	2.6698
4.80333	3.14971	3.7917	3.6169	3.05683	3.6904	3.75	2.83324	3.3806	3.0792	2.44101	2.9875	2.6699
4.80667	3.14933	3.7931	3.6153	3.05598	3.6906	3.7504	2.82939	3.3777	3.0774	2.43824	2.9877	2.6697
4.81	3.14959	3.7966	3.6158	3.05531	3.6909	3.751	2.82702	3.3775	3.0782	2.43378	2.9858	2.6695
4.81333	3.15264	3.7959	3.6171	3.05492	3.6937	3.7497	2.82967	3.3775	3.0794	2.43689	2.9847	2.6704
4.81667	3.15088	3.7914	3.6164	3.05592	3.696	3.7518	2.82868	3.3781	3.0799	2.43358	2.9855	2.6706
4.82	3.1479	3.7905	3.6169	3.06257	3.6942	3.75	2.82634	3.3777	3.0814	2.43325	2.9816	2.67
4.82333	3.15093	3.7908	3.6179	3.06054	3.6926	3.7525	2.82947	3.3779	3.0832	2.43468	2.9802	2.6701
4.82667	3.153	3.7857	3.6181	3.06166	3.6926	3.7516	2.8213	3.3771	3.0812	2.43801	2.9792	2.6701
4.83	3.14347	3.7847	3.6163	3.05168	3.6909	3.7539	2.82257	3.3767	3.0804	2.43462	2.9784	2.6688
4.83333	3.15484	3.7835	3.617	3.05765	3.6908	3.7506	2.8246	3.377	3.0758	2.4383	2.9756	2.6674
4.83667	3.15324	3.7818	3.618	3.05067	3.6912	3.7483	2.82776	3.3775	3.0745	2.43847	2.9774	2.6666
4.84	3.15069	3.7795	3.6187	3.05468	3.69	3.7441	2.8328	3.3783	3.072	2.43923	2.9758	2.665
4.84333	3.15316	3.7828	3.6172	3.05731	3.6897	3.7452	2.83007	3.3793	3.0707	2.43133	2.9777	2.6644
4.84667	3.15225	3.7827	3.6178	3.05707	3.6903	3.7443	2.83029	3.3768	3.0724	2.43316	2.9796	2.6647
4.85	3.15176	3.7839	3.6161	3.05342	3.6871	3.7467	2.82262	3.3753	3.0742	2.43549	2.9767	2.665
4.85333	3.14381	3.785	3.6158	3.05291	3.6873	3.7497	2.82595	3.3732	3.0722	2.43382	2.9765	2.6651
4.85667	3.14758	3.7863	3.613	3.05112	3.6878	3.7519	2.8285	3.3726	3.0701	2.43204	2.9756	2.6658
4.86	3.14692	3.7872	3.6123	3.05185	3.6879	3.751	2.82477	3.372	3.0692	2.43176	2.9736	2.6669
4.86333	3.15326	3.7875	3.6113	3.05833	3.6877	3.7495	2.82195	3.3745	3.0656	2.43337	2.9743	2.6653
4.86667	3.14958	3.7877	3.6125	3.05176	3.6885	3.7495	2.82936	3.3747	3.0642	2.43789	2.9758	2.6641
4.87	3.15149	3.789	3.6109	3.05576	3.6893	3.748	2.83395	3.3745	3.0629	2.43596	2.978	2.6632
4.87333	3.1479	3.7894	3.6123	3.05471	3.6888	3.7494	2.82208	3.3735	3.0653	2.43857	2.9824	2.6621
4.87667	3.14729	3.7868	3.613	3.05054	3.6873	3.7507	2.82731	3.3731	3.0667	2.43638	2.9823	2.6609
4.88	3.14754	3.784	3.6124	3.05543	3.6861	3.7524	2.82258	3.3728	3.0691	2.43488	2.982	2.6599
4.88333	3.14923	3.7849	3.6117	3.05072	3.6868	3.7486	2.82677	3.3718	3.0672	2.42957	2.9804	2.6608
4.88667	3.14697	3.7816	3.6127	3.04948	3.6855	3.749	2.81805	3.3727	3.0677	2.43235	2.9776	2.6608
4.89	3.14331	3.784	3.6117	3.05177	3.6881	3.7465	2.82853	3.3726	3.0654	2.43241	2.9712	2.6619
4.89333	3.14895	3.7828	3.6119	3.05622	3.6868	3.7473	2.82285	3.3726	3.0616	2.42926	2.9733	2.6613
4.89667	3.15099	3.7854	3.6122	3.05569	3.6885	3.7462	2.83004	3.3709	3.0612	2.42793	2.971	2.6617
4.9	3.14875	3.7823	3.6119	3.05158	3.6871	3.7488	2.82592	3.3719	3.061	2.43094	2.9733	2.6606
4.90333	3.15262	3.7814	3.6121	3.05164	3.6868	3.7478	2.82672	3.3722	3.0599	2.4276	2.9723	2.6593
4.90667	3.14607	3.7755	3.6129	3.05224	3.6848	3.7453	2.82187	3.3724	3.0578	2.43356	2.9734	2.6592
4.91	3.14584	3.7744	3.6113	3.05135	3.6856	3.7433	2.82638	3.3711	3.0597	2.43368	2.9723	2.6586
4.91333	3.14344	3.7717	3.6119	3.05194	3.6849	3.7451	2.82119	3.3717	3.0598	2.42936	2.9703	2.6581
4.91667	3.14925	3.774	3.6115	3.04465	3.6861	3.746	2.82206	3.372	3.0631	2.43166	2.9697	2.6593
4.92	3.1462	3.7779	3.6088	3.04874	3.6856	3.7455	2.82077	3.3698	3.0628	2.42285	2.9704	2.6602
4.92333	3.14355	3.7815	3.6076	3.04672	3.685	3.7498	2.82629	3.369	3.0663	2.43134	2.9715	2.6598
4.92667	3.14355	3.7827	3.6092	3.04652	3.686	3.7503	2.8226	3.368	3.0678	2.42822	2.968	2.6589
4.93	3.14798	3.7816	3.6083	3.04482	3.6838	3.7476	2.82227	3.3687	3.0661	2.4273	2.9691	2.6595
4.93333	3.14603	3.7808	3.6077	3.04603	3.6837	3.7454	2.82166	3.3668	3.0649	2.42705	2.9671	2.6573
4.93667	3.14769	3.779	3.6076	3.04527	3.6853	3.7473	2.82036	3.3671	3.0655	2.43291	2.9697	2.6568
4.94	3.14166	3.78	3.6081	3.04735	3.6862	3.7448	2.81735	3.3677	3.0642	2.42484	2.9699	2.6552
4.94333	3.14414	3.7809	3.6079	3.05135	3.6831	3.7456	2.81711	3.3688	3.0597	2.42981	2.9724	2.6553
4.94667	3.14839	3.7839	3.6089	3.04793	3.6847	3.7476	2.81807	3.3682	3.0584	2.43025	2.9745	2.6543
4.95	3.14635	3.78	3.6089	3.04953	3.6856	3.7495	2.82118	3.3692	3.0547	2.42692	2.9753	2.654
4.95333	3.14526	3.7813	3.6108	3.04696	3.684	3.7462	2.82106	3.3682	3.0523	2.4266	2.9726	2.6548
4.95667	3.14504	3.7793	3.6094	3.04424	3.6827	3.7471	2.81871	3.3673	3.0517	2.428	2.9696	2.6556
4.96	3.14193	3.7809	3.6081	3.04797	3.684	3.7457	2.81859	3.3661	3.0548	2.42996	2.9663	2.655
4.96333	3.14268	3.7789	3.6067	3.04101	3.6821	3.7452	2.8181	3.3645	3.0563	2.42774	2.9654	2.6546
4.96667	3.14557	3.7799	3.606	3.04443	3.6803	3.7444	2.81353	3.3645	3.0583	2.41807	2.9669	2.6543
4.97	3.14377	3.7816	3.6049	3.04575	3.6809	3.7464	2.82265	3.3649	3.059	2.4221	2.9686	2.6532
4.97333	3.14437	3.7812	3.6051	3.04851	3.6815	3.745	2.82172	3.3661	3.0599	2.42562	2.971	2.6521
4.97667	3.14372	3.7796	3.6054	3.04326	3.6817	3.7427	2.81673	3.3654	3.0566	2.42267	2.9732	2.6521
4.98	3.14169	3.7816	3.6044	3.04226	3.683	3.7421	2.82114	3.3659	3.0536	2.42641	2.9703	2.6519
4.98333	3.14305	3.7846	3.6044	3.04222	3.6831	3.7407	2.81687	3.3648	3.0528	2.42897	2.9682	2.6534
4.98667	3.13852	3.7836	3.6026	3.0437	3.6822	3.7419	2.82092	3.3638	3.0522	2.42425	2.9653	2.6525
4.99	3.1458	3.7836	3.6033	3.04502	3.6823	3.7417	2.81912	3.3628	3.0493	2.42904	2.9653	2.6525
4.99333	3.14244	3.7836	3.6025	3.04469	3.6825	3.7437	2.82003	3.3646	3.0499	2.4267	2.9657	2.6528
4.99667	3.14281	3.7826	3.6036	3.03979	3.6814	3.743	2.81792	3.3628	3.049	2.42522	2.9669	2.6527
5	3.14043	3.7822	3.6033	3.04305	3.6804	3.7416	2.82133	3.3615	3.0489	2.42056	2.9678	2.6513
5.00333	3.14081	3.7805	3.6035	3.03852	3.6838	3.7395	2.81318	3.3625	3.0497	2.4196	2.9646	2.6509
5.00667	3.14208	3.7806	3.6032	3.04206	3.6807	3.7409	2.82145	3.3614	3.0499	2.42543	2.9625	2.6503
5.01	3.13975	3.7802	3.6029	3.04352	3.6809	3.7409	2.8184	3.3598	3.0511	2.42508	2.9609	2.6496
5.01333	3.13818	3.7811	3.6027	3.04556	3.6833	3.7418	2.82174	3.361	3.0538	2.4284	2.9615	2.6491
5.01667	3.14195	3.7807	3.6029	3.04081	3.6812	3.7423	2.81172	3.3632	3.0536	2.42022	2.9608	2.6499
5.02	3.13553	3.7798	3.6023	3.03939	3.6789	3.7422	2.82037	3.3636	3.0536	2.41904	2.9606	2.651
5.02333	3.1379	3.775	3.6012	3.04201	3.6803	3.7424	2.81125	3.3617	3.0526	2.41864	2.9602	2.6513
5.02667	3.13714	3.772	3.601	3.04002	3.6773	3.7404	2.8161	3.3614	3.0509	2.42562	2.9591	2.6521
5.03	3.14076	3.7691	3.6004	3.03472	3.6746	3.7412	2.8198	3.3606	3.0501	2.42307	2.9568	2.6517
5.03333	3.1371	3.7658	3.601	3.04238	3.6762	3.7419	2.81987	3.3587	3.0483	2.42215	2.9535	2.6509
5.03667	3.13942	3.7649	3.6013	3.04208	3.6721	3.7421	2.81532	3.3588	3.0483	2.41829	2.9568	2.6482
5.04	3.1368	3.769	3.6017	3.04254	3.6716	3.7406	2.81213	3.3576	3.0488	2.42404	2.9593	2.6485
5.04333	3.13621	3.7684	3.602	3.04147	3.6721	3.7415	2.81427	3.3579	3.0512	2.42107	2.9621	2.6467
5.04667	3.14181	3.7682	3.6012	3.04367	3.6709	3.738	2.82026	3.358	3.0486	2.42429	2.9652	2.6474
5.05	3.13485	3.768	3.6009	3.03899	3.6694	3.7383	2.81711	3.3583	3.0499	2.41242	2.9672	2.6467
5.05333	3.13198	3.7685	3.6013	3.0372	3.6696	3.7372	2.81049	3.3541	3.0497	2.42002	2.9646	2.6468
5.05667	3.13427	3.7692	3.6004	3.03523	3.6695	3.739	2.81275	3.3568	3.052	2.42235	2.9611	2.645
5.06	3.14169	3.7686	3.6003	3.04098	3.6687	3.7398	2.81244	3.3565	3.0485	2.42204	2.9568	2.6453
5.06333	3.1383	3.7701	3.6	3.03825	3.67	3.7421	2.80843	3.3561	3.0481	2.4245	2.9522	2.6461
5.06667	3.13684	3.7709	3.5992	3.04056	3.6709	3.7418	2.81115	3.3559	3.048	2.41703	2.9522	2.6465
5.07	3.1334	3.7704	3.5988	3.03796	3.6721	3.7406	2.81416	3.3581	3.047	2.41982	2.9546	2.646
5.07333	3.13458	3.7653	3.599	3.03925	3.6692	3.7394	2.81142	3.3584	3.0419	2.4218	2.9573	2.6453
5.07667	3.13705	3.7784	3.5986	3.03827	3.6708	3.7392	2.81173	3.357	3.0411	2.42017	2.9591	2.6447
5.08	3.14175	3.7726	3.5981	3.03681	3.6699	3.7398	2.80751	3.3554	3.0415	2.41967	2.9623	2.6427
5.08333	3.13696	3.7797	3.5976	3.04324	3.6697	3.7399	2.81394	3.3546	3.0392	2.41985	2.9612	2.6419
5.08667	3.13393	3.7762	3.5962	3.0339	3.6669	3.7412	2.80906	3.3544	3.0373	2.41584	2.9562	2.6412
5.09	3.13438	3.7801	3.5959	3.039	3.6666	3.7408	2.81701	3.3532	3.0374	2.41902	2.9523	2.6426
5.09333	3.13832	3.769	3.5949	3.03855	3.6631	3.7411	2.81475	3.3537	3.036	2.41521	2.9513	2.642
5.09667	3.13058	3.7758	3.596	3.03755	3.6618	3.7385	2.81484	3.3534	3.0379	2.41628	2.9507	2.6418
5.1	3.13264	3.7685	3.5963	3.03921	3.6597	3.7406	2.80268	3.353	3.041	2.42053	2.9528	2.6411
5.10333	3.13017	3.7749	3.597	3.04202	3.6622	3.7389	2.81508	3.3528	3.0421	2.42113	2.9571	2.64
5.10667	3.13505	3.7776	3.596	3.03823	3.662	3.7421	2.81261	3.3524	3.0448	2.41368	2.9595	2.6392
5.11	3.13473	3.7787	3.5966	3.03389	3.6622	3.7375	2.81578	3.351	3.0461	2.41471	2.9622	2.6395
5.11333	3.1254	3.7826	3.5953	3.03385	3.6619	3.7396	2.80797	3.3503	3.0434	2.4201	2.9617	2.6395
5.11667	3.13555	3.7865	3.5956	3.03568	3.6649	3.7361	2.80885	3.3505	3.0437	2.41664	2.9586	2.6389
5.12	3.1334	3.7822	3.5949	3.03589	3.6631	3.7398	2.81357	3.3527	3.0458	2.41769	2.9529	2.6404
5.12333	3.12874	3.7803	3.5961	3.03766	3.6642	3.7368	2.8064	3.3513	3.0432	2.40986	2.9526	2.6404
5.12667	3.13853	3.7821	3.5949	3.03556	3.6629	3.7402	2.80478	3.3521	3.0426	2.4195	2.9503	2.6394
5.13	3.13147	3.7746	3.5957	3.03773	3.6631	3.7394	2.80656	3.352	3.0412	2.41694	2.9463	2.6396
5.13333	3.12905	3.7734	3.5952	3.03575	3.6607	3.7418	2.80895	3.3513	3.0386	2.41448	2.9495	2.6408
5.13667	3.13647	3.7768	3.5949	3.02907	3.6608	3.7389	2.80907	3.3505	3.0391	2.41552	2.952	2.6403
5.14	3.12929	3.775	3.593	3.0295	3.6619	3.7402	2.81464	3.3513	3.0411	2.41769	2.9509	2.639
5.14333	3.13271	3.7716	3.5932	3.0334	3.6646	3.7398	2.8077	3.351	3.0438	2.41133	2.9515	2.6393
5.14667	3.12827	3.774	3.5918	3.0304	3.6638	3.7381	2.81072	3.352	3.0447	2.4204	2.9522	2.6378
5.15	3.13206	3.772	3.5899	3.03012	3.6625	3.736	2.81347	3.3525	3.0462	2.41621	2.9472	2.6363
5.15333	3.12639	3.7713	3.5904	3.03532	3.6631	3.7347	2.80808	3.351	3.0442	2.416	2.9463	2.6359
5.15667	3.12787	3.7773	3.5904	3.03156	3.6626	3.7322	2.81101	3.3503	3.0427	2.41603	2.9455	2.636
5.16	3.13501	3.7783	3.5887	3.02885	3.6623	3.736	2.81439	3.3494	3.0417	2.40816	2.9432	2.6356
5.16333	3.12855	3.7772	3.5899	3.03255	3.6627	3.7373	2.81115	3.3484	3.0414	2.41717	2.9443	2.6356
5.16667	3.12573	3.7747	3.5902	3.03111	3.6647	3.74	2.80887	3.3465	3.041	2.41473	2.9471	2.6341
5.17	3.1279	3.7708	3.5894	3.03148	3.6619	3.7422	2.81383	3.3452	3.0402	2.4146	2.9486	2.6334
5.17333	3.1253	3.7628	3.5888	3.02962	3.6625	3.7443	2.81032	3.3463	3.043	2.41475	2.9463	2.632
5.17667	3.12919	3.7627	3.5891	3.03029	3.6619	3.7408	2.80426	3.3456	3.0417	2.40888	2.9454	2.6315
5.18	3.1313	3.76	3.5883	3.02793	3.6627	3.7413	2.80865	3.3454	3.0416	2.40974	2.9438	2.6322
5.18333	3.12502	3.7614	3.5887	3.0331	3.6618	3.7399	2.80519	3.3452	3.0395	2.40604	2.9426	2.6345
5.18667	3.1316	3.7636	3.5891	3.02808	3.6636	3.7411	2.80743	3.3452	3.039	2.40743	2.9426	2.635
5.19	3.13232	3.7645	3.5891	3.03032	3.6626	3.7393	2.81137	3.3442	3.0361	2.41567	2.9412	2.6357
5.19333	3.12513	3.7623	3.5907	3.03116	3.6626	3.7388	2.80799	3.3437	3.0364	2.40639	2.942	2.6357
5.19667	3.13083	3.7637	3.59	3.02804	3.661	3.7373	2.80195	3.3438	3.0372	2.40982	2.9444	2.6345
5.2	3.1263	3.7676	3.5885	3.03138	3.6637	3.7378	2.81056	3.3456	3.0396	2.4155	2.9454	2.6328
5.20333	3.12462	3.7684	3.5867	3.02358	3.6644	3.736	2.80419	3.3458	3.0386	2.40809	2.9458	2.6324
5.20667	3.12627	3.771	3.5859	3.02785	3.6647	3.7335	2.80307	3.3454	3.0363	2.40192	2.9478	2.6329
5.21	3.12756	3.7735	3.5839	3.02845	3.6646	3.7332	2.80187	3.3476	3.0349	2.41808	2.9474	2.6331
5.21333	3.12523	3.7725	3.5836	3.03253	3.6667	3.7343	2.80759	3.346	3.0375	2.40948	2.9467	2.6328
5.21667	3.12395	3.7711	3.5833	3.02917	3.6628	3.7342	2.80734	3.3439	3.0352	2.40787	2.9453	2.6319
5.22	3.12591	3.7711	3.5852	3.03133	3.6628	3.7345	2.80618	3.3433	3.0344	2.40489	2.9411	2.631
5.22333	3.12528	3.7702	3.5848	3.02966	3.6619	3.7375	2.80718	3.3432	3.0374	2.4031	2.9402	2.6308
5.22667	3.12379	3.7681	3.5846	3.03209	3.6625	3.7383	2.80721	3.3408	3.0385	2.40617	2.9411	2.6294
5.23	3.12532	3.7714	3.5843	3.03105	3.6612	3.7343	2.80627	3.3399	3.0351	2.40982	2.9379	2.6287
5.23333	3.13069	3.7692	3.5845	3.02464	3.6641	3.735	2.80703	3.341	3.0352	2.40848	2.9355	2.6303
5.23667	3.12465	3.7676	3.5842	3.02932	3.6629	3.7351	2.80573	3.3412	3.0365	2.411	2.9372	2.631
5.24	3.12223	3.7688	3.5846	3.02548	3.6635	3.7341	2.80111	3.3388	3.0358	2.41597	2.9388	2.6289
5.24333	3.12335	3.7686	3.5854	3.02814	3.6613	3.7319	2.80135	3.3371	3.0355	2.40359	2.9379	2.63
5.24667	3.12034	3.7625	3.5848	3.0301	3.6624	3.7372	2.80388	3.3387	3.0374	2.40523	2.9389	2.6307
5.25	3.12266	3.76	3.5835	3.02314	3.6605	3.735	2.80162	3.3373	3.0371	2.40732	2.9406	2.6284
5.25333	3.12496	3.7607	3.5824	3.02894	3.6621	3.7368	2.80717	3.3366	3.0342	2.4081	2.9398	2.6288
5.25667	3.11867	3.7597	3.5823	3.03035	3.6628	3.7352	2.80312	3.3374	3.0333	2.40676	2.9383	2.6286
5.26	3.13379	3.7593	3.5819	3.027	3.6624	3.7376	2.79714	3.3404	3.0316	2.40536	2.9397	2.6293
5.26333	3.11613	3.763	3.5808	3.02584	3.6606	3.7338	2.80184	3.3407	3.0307	2.40192	2.9402	2.6272
5.26667	3.12648	3.7649	3.583	3.02871	3.6601	3.7355	2.80281	3.3412	3.0301	2.40844	2.9409	2.6286
5.27	3.12338	3.7624	3.5837	3.02893	3.6593	3.7335	2.80479	3.3397	3.0295	2.39923	2.9416	2.6257
5.27333	3.12291	3.7597	3.5831	3.02644	3.6587	3.7362	2.80442	3.3383	3.0313	2.40585	2.9427	2.627
5.27667	3.12073	3.7605	3.5827	3.02115	3.6603	3.7328	2.80239	3.3374	3.0311	2.40241	2.9388	2.6238
5.28	3.1144	3.7658	3.5838	3.02877	3.6604	3.7346	2.80292	3.3364	3.0304	2.40108	2.9393	2.6263
5.28333	3.12614	3.7662	3.5818	3.02695	3.661	3.731	2.80188	3.3353	3.0313	2.4039	2.9385	2.6237
5.28667	3.12764	3.7674	3.5785	3.02627	3.6595	3.7326	2.80854	3.3368	3.0339	2.40961	2.9361	2.6246
5.29	3.12446	3.7674	3.5786	3.022	3.6591	3.7319	2.80219	3.3386	3.0287	2.40761	2.9352	2.6233
5.29333	3.11789	3.7656	3.5778	3.02317	3.6587	3.7348	2.7964	3.338	3.027	2.39898	2.9374	2.6241
5.29667	3.12375	3.7622	3.5776	3.02492	3.6589	3.7325	2.8038	3.3378	3.0243	2.3999	2.935	2.6208
5.3	3.12202	3.7606	3.5776	3.02276	3.6587	3.736	2.7978	3.3381	3.0245	2.39701	2.9335	2.6219
5.30333	3.12385	3.7602	3.5804	3.02723	3.6593	3.7322	2.8052	3.3354	3.0226	2.39908	2.9315	2.6216
5.30667	3.12029	3.7602	3.5794	3.02536	3.6601	3.734	2.80093	3.3363	3.0241	2.40096	2.9321	2.6203
5.31	3.12104	3.7582	3.5801	3.0224	3.6593	3.7318	2.80507	3.334	3.025	2.40705	2.9263	2.6199
5.31333	3.12119	3.7563	3.5796	3.0185	3.6585	3.7341	2.80003	3.3348	3.0255	2.40132	2.9255	2.6218
5.31667	3.11882	3.7541	3.5776	3.0205	3.6593	3.7289	2.80512	3.3346	3.0228	2.40319	2.9256	2.6209
5.32	3.12104	3.7541	3.5764	3.02521	3.6606	3.7322	2.79382	3.337	3.0249	2.39847	2.9299	2.6198
5.32333	3.12173	3.7566	3.576	3.02591	3.6578	3.7304	2.7978	3.3352	3.028	2.39914	2.9268	2.6202
5.32667	3.12654	3.7601	3.5751	3.02812	3.6595	3.7309	2.7959	3.3361	3.0283	2.39918	2.9342	2.6197
5.33	3.12002	3.7594	3.5754	3.01788	3.6589	3.7292	2.79706	3.3358	3.0282	2.4055	2.9387	2.6192
5.33333	3.1166	3.7585	3.5766	3.02103	3.6588	3.7329	2.79842	3.3348	3.028	2.40162	2.939	2.6188
5.33667	3.12191	3.7568	3.5758	3.02373	3.6562	3.7291	2.80572	3.3342	3.0244	2.39799	2.9387	2.6181
5.34	3.11607	3.7525	3.5774	3.02528	3.6577	3.7298	2.79714	3.3324	3.0199	2.39881	2.94	2.6181
5.34333	3.1269	3.7501	3.5758	3.02719	3.657	3.7289	2.79312	3.3332	3.0203	2.39818	2.937	2.6187
5.34667	3.11881	3.7515	3.5745	3.02379	3.6584	3.7309	2.79868	3.3333	3.0183	2.40176	2.9336	2.6182
5.35	3.11369	3.7519	3.576	3.02092	3.6579	3.7291	2.80181	3.3328	3.0173	2.40202	2.9303	2.6193
5.35333	3.11353	3.7534	3.5748	3.01544	3.6589	3.7307	2.79633	3.3311	3.0173	2.39842	2.9286	2.6204
5.35667	3.12152	3.7568	3.5739	3.02296	3.6566	3.727	2.80269	3.332	3.0159	2.39991	2.929	2.62
5.36	3.11898	3.7604	3.5752	3.01882	3.6571	3.7286	2.80027	3.3311	3.0154	2.39878	2.9284	2.6191
5.36333	3.1143	3.7631	3.5756	3.01648	3.6554	3.7256	2.79784	3.3309	3.017	2.39602	2.9263	2.6186
5.36667	3.11496	3.768	3.5748	3.01729	3.6545	3.7279	2.79925	3.3315	3.0203	2.39964	2.9263	2.6175
5.37	3.12424	3.7689	3.5742	3.01499	3.6549	3.7255	2.79249	3.3325	3.0194	2.3962	2.9248	2.6174
5.37333	3.11893	3.7682	3.5746	3.01525	3.6565	3.7273	2.79912	3.3332	3.0208	2.39768	2.9239	2.6161
5.37667	3.12065	3.7659	3.5749	3.0188	3.6532	3.7248	2.79886	3.3328	3.0193	2.39478	2.9239	2.6158
5.38	3.11671	3.7615	3.575	3.01743	3.6526	3.7278	2.79883	3.3306	3.0186	2.40283	2.9275	2.6151
5.38333	3.11309	3.7575	3.5736	3.01757	3.6521	3.726	2.79527	3.3303	3.017	2.39555	2.9295	2.6148
5.38667	3.11276	3.7556	3.5745	3.01986	3.652	3.7283	2.80273	3.329	3.0191	2.39788	2.9309	2.6135
5.39	3.11879	3.7561	3.5719	3.02597	3.6522	3.7255	2.80293	3.3271	3.0202	2.39872	2.9303	2.6153
5.39333	3.11529	3.7563	3.5702	3.02148	3.6533	3.7257	2.79558	3.3279	3.0224	2.39597	2.9296	2.6162
5.39667	3.11132	3.755	3.5691	3.01548	3.6541	3.7246	2.79802	3.3267	3.0207	2.39384	2.9262	2.6157
5.4	3.11721	3.7594	3.5696	3.01842	3.6535	3.724	2.79476	3.3269	3.0156	2.39777	2.9261	2.6143
5.40333	3.11645	3.7581	3.5702	3.01825	3.652	3.7213	2.79428	3.327	3.0174	2.39365	2.9258	2.614
5.40667	3.11315	3.7538	3.5713	3.01862	3.6497	3.7225	2.7971	3.3283	3.0144	2.39796	2.9255	2.6125
5.41	3.11032	3.7539	3.5715	3.0199	3.6492	3.7244	2.79306	3.3267	3.0147	2.39411	2.9245	2.6119
5.41333	3.11507	3.7563	3.5717	3.01441	3.6484	3.7247	2.79296	3.3288	3.0143	2.3941	2.9247	2.6121
5.41667	3.11234	3.7535	3.5699	3.01474	3.6491	3.7249	2.79724	3.3289	3.0175	2.39548	2.9253	2.6131
5.42	3.11683	3.7608	3.5681	3.01091	3.6492	3.7258	2.79307	3.329	3.0177	2.3989	2.9246	2.6137
5.42333	3.1139	3.7651	3.5677	3.016	3.6502	3.7273	2.79572	3.3275	3.0177	2.39668	2.9245	2.6147
5.42667	3.11498	3.7627	3.5676	3.0165	3.6516	3.724	2.79762	3.3266	3.0166	2.39459	2.9238	2.6126
5.43	3.11327	3.7571	3.5673	3.01713	3.6529	3.7236	2.79389	3.325	3.0178	2.39361	2.9221	2.611
5.43333	3.11466	3.7552	3.5673	3.00963	3.6524	3.7215	2.79398	3.3229	3.0147	2.39181	2.9221	2.6119
5.43667	3.10994	3.7512	3.5677	3.01415	3.6536	3.7229	2.79435	3.3238	3.0103	2.39009	2.9199	2.6122
5.44	3.1205	3.7422	3.5662	3.01214	3.6544	3.7214	2.79078	3.324	3.0106	2.39202	2.9199	2.6108
5.44333	3.1134	3.752	3.5656	3.01371	3.6518	3.7231	2.7925	3.325	3.012	2.39575	2.9208	2.6108
5.44667	3.11964	3.7535	3.5648	3.01975	3.6508	3.7214	2.79251	3.3252	3.0103	2.39052	2.9253	2.6123
5.45	3.11126	3.7567	3.5645	3.01892	3.6489	3.7237	2.79359	3.3251	3.0113	2.39425	2.9244	2.6102
5.45333	3.1135	3.7541	3.5646	3.00913	3.647	3.7216	2.79575	3.3247	3.0142	2.39359	2.9247	2.6106
5.45667	3.11042	3.7665	3.5648	3.00998	3.6443	3.7233	2.79942	3.3242	3.0152	2.3921	2.9253	2.6128
5.46	3.10779	3.7612	3.5657	3.01117	3.6466	3.7233	2.7958	3.3238	3.0107	2.38785	2.9251	2.612
5.46333	3.11116	3.7661	3.5646	3.01478	3.6456	3.7229	2.79432	3.3247	3.0104	2.38654	2.9199	2.611
5.46667	3.10718	3.7642	3.5659	3.01774	3.6465	3.7239	2.79096	3.3259	3.0101	2.3918	2.9185	2.6117
5.47	3.1097	3.7616	3.5653	3.01468	3.6444	3.7241	2.79459	3.3253	3.0079	2.38948	2.9182	2.6099
5.47333	3.11221	3.7522	3.566	3.01315	3.6448	3.722	2.78715	3.3252	3.0055	2.3874	2.918	2.6082
5.47667	3.11256	3.7477	3.5656	3.01446	3.6427	3.7186	2.79419	3.3255	3.0064	2.39327	2.9153	2.6093
5.48	3.11308	3.7439	3.565	3.01275	3.6423	3.7221	2.79211	3.3237	3.005	2.38737	2.9196	2.6096
5.48333	3.10559	3.7443	3.5645	3.01054	3.6409	3.7197	2.79226	3.3219	3.0073	2.39029	2.9197	2.6088
5.48667	3.1168	3.746	3.5646	3.01491	3.6422	3.7205	2.79005	3.3218	3.0085	2.38741	2.9207	2.6093
5.49	3.11081	3.7474	3.5644	3.01181	3.6416	3.7215	2.78912	3.3204	3.0109	2.38856	2.9197	2.6087
5.49333	3.1099	3.75	3.5639	3.01157	3.6411	3.7248	2.79139	3.3198	3.0121	2.38577	2.9218	2.6079
5.49667	3.109	3.7512	3.5643	3.01088	3.641	3.7229	2.79732	3.3203	3.0124	2.3892	2.9178	2.6076
5.5	3.03497	2.6405	2.814	3.08498	3.7049	3.4494	3.05619	3.2587	2.8774	3.06888	3.0231	2.708
5.50333	3.01497	2.6033	2.7561	3.0638	3.6743	3.4251	3.05376	3.2234	2.8581	3.08313	3.0085	2.7057
5.50667	2.99128	2.5756	2.7323	3.03944	3.6234	3.3973	3.03416	3.202	2.8271	3.10254	3.0006	2.6909
5.51	2.96396	2.549	2.7135	3.02374	3.6093	3.3709	3.02167	3.1708	2.8306	3.10103	2.9834	2.678
5.51333	2.94148	2.5268	2.6852	2.99895	3.5744	3.3485	3.00334	3.1574	2.7995	3.09246	2.9727	2.6691
5.51667	2.91462	2.4995	2.6569	2.97807	3.547	3.3259	2.99708	3.131	2.7831	3.09563	2.9606	2.6575
5.52	2.9017	2.4794	2.6408	2.96107	3.5193	3.3014	2.97236	3.1118	2.7649	3.09943	2.9482	2.646
5.52333	2.87686	2.4614	2.6188	2.93355	3.5042	3.2834	2.95714	3.0934	2.7496	3.0849	2.9376	2.6359
5.52667	2.86191	2.4455	2.5977	2.91996	3.4852	3.2635	2.9527	3.0782	2.7298	3.08206	2.9283	2.6278
5.53	2.83733	2.4305	2.5781	2.90593	3.4684	3.247	2.93388	3.0598	2.7168	3.07356	2.9187	2.6197
5.53333	2.82502	2.4173	2.5594	2.88865	3.4531	3.2289	2.91592	3.0455	2.7032	3.06774	2.9115	2.6134
5.53667	2.80563	2.4027	2.5391	2.86344	3.4349	3.2119	2.9065	3.0319	2.6931	3.06992	2.9037	2.6067
5.54	2.78696	2.3907	2.5282	2.8541	3.4144	3.1944	2.89301	3.0186	2.6815	3.06785	2.8973	2.6022
5.54333	2.77588	2.3769	2.5132	2.84551	3.397	3.1792	2.88075	3.0065	2.6731	3.05779	2.8906	2.5957
5.54667	2.7548	2.3639	2.5007	2.82188	3.3822	3.163	2.87562	2.9983	2.6642	3.04741	2.8836	2.5889
5.55	2.74361	2.3503	2.4848	2.82016	3.365	3.1489	2.85981	2.9893	2.6524	3.0546	2.8768	2.5845
5.55333	2.7246	2.337	2.4753	2.79903	3.3511	3.1371	2.84977	2.9778	2.6392	3.05454	2.8703	2.5766
5.55667	2.70383	2.3239	2.4615	2.7874	3.3356	3.1204	2.84188	2.9674	2.6301	3.04937	2.863	2.5704
5.56	2.69312	2.3136	2.4497	2.77611	3.3237	3.1069	2.8311	2.9586	2.6184	3.04997	2.8567	2.5654
5.56333	2.67891	2.3033	2.4391	2.76508	3.3099	3.0943	2.81831	2.9477	2.6096	3.04402	2.8487	2.5615
5.56667	2.66423	2.2924	2.4293	2.75165	3.2997	3.0823	2.81742	2.9366	2.6021	3.03451	2.8409	2.5557
5.57	2.64837	2.282	2.4146	2.73923	3.2903	3.069	2.80568	2.9287	2.5924	3.03827	2.8336	2.5508
5.57333	2.62694	2.2721	2.4029	2.72182	3.2827	3.0589	2.79271	2.9185	2.5858	3.03611	2.8284	2.5464
5.57667	2.62355	2.2623	2.3955	2.70984	3.2708	3.0475	2.78467	2.9065	2.5772	3.03063	2.8216	2.5419
5.58	2.60029	2.2501	2.3845	2.70192	3.2633	3.0351	2.78369	2.895	2.5691	3.03733	2.8188	2.5365
5.58333	2.58282	2.2395	2.3735	2.68993	3.2516	3.0236	2.76411	2.8877	2.563	3.03415	2.8134	2.531
5.58667	2.57135	2.2285	2.3646	2.67004	3.2398	3.0117	2.76536	2.876	2.5539	3.02824	2.8049	2.527
5.59	2.5603	2.2165	2.3547	2.66424	3.2264	3.0014	2.75275	2.8669	2.5453	3.02	2.7969	2.5219
5.59333	2.54083	2.2059	2.3395	2.65141	3.2158	2.9924	2.73578	2.8576	2.5356	3.02162	2.7926	2.5164
5.59667	2.53021	2.198	2.3273	2.64293	3.2004	2.9819	2.73661	2.8484	2.525	3.01939	2.7854	2.5131
5.6	2.51208	2.1916	2.3167	2.62806	3.1877	2.9713	2.72386	2.8383	2.518	3.00958	2.7798	2.5107
5.60333	2.50048	2.1807	2.304	2.61212	3.1753	2.9611	2.71702	2.831	2.5098	3.01694	2.7746	2.5043
5.60667	2.48553	2.1741	2.2973	2.59947	3.1648	2.9529	2.70578	2.8216	2.5026	3.00805	2.7691	2.5003
5.61	2.47015	2.1637	2.2909	2.58945	3.1555	2.9418	2.69512	2.814	2.495	3.00638	2.7637	2.4976
5.61333	2.45272	2.1541	2.2832	2.56748	3.146	2.9309	2.68428	2.8072	2.4877	3.00716	2.7582	2.4927
5.61667	2.43803	2.1433	2.272	2.56697	3.1367	2.9238	2.67773	2.7989	2.4787	2.99318	2.7549	2.4882
5.62	2.42819	2.1344	2.2644	2.54986	3.1294	2.9122	2.6725	2.79	2.4749	2.98824	2.7474	2.4848
5.62333	2.41058	2.1241	2.2528	2.53675	3.1184	2.9003	2.65942	2.7824	2.469	2.98891	2.7433	2.4809
5.62667	2.39905	2.1171	2.2471	2.53045	3.1076	2.8905	2.65009	2.775	2.4614	2.99277	2.7359	2.4757
5.63	2.3828	2.1089	2.2376	2.51444	3.0997	2.8814	2.64749	2.7651	2.456	2.98035	2.731	2.4716
5.63333	2.3736	2.1	2.2299	2.50466	3.0895	2.8694	2.63599	2.7555	2.449	2.98058	2.7238	2.4657
5.63667	2.35819	2.0899	2.2205	2.49221	3.0782	2.8617	2.62509	2.7459	2.4368	2.97535	2.722	2.4614
5.64	2.34478	2.0803	2.2141	2.4756	3.07	2.852	2.61607	2.7391	2.4279	2.97527	2.7144	2.4566
5.64333	2.32763	2.0701	2.2039	2.46328	3.0588	2.8427	2.60338	2.7305	2.4196	2.96736	2.7093	2.4532
5.64667	2.3124	2.0613	2.1972	2.45706	3.0498	2.8331	2.59585	2.7209	2.4126	2.9698	2.7031	2.448
5.65	2.30651	2.0544	2.191	2.44324	3.0424	2.8246	2.59734	2.7125	2.4036	2.96282	2.697	2.4451
5.65333	2.28933	2.0438	2.1816	2.43344	3.0313	2.8145	2.58233	2.7049	2.3973	2.96305	2.6905	2.4405
5.65667	2.27387	2.0346	2.1703	2.42411	3.0206	2.8059	2.56885	2.6971	2.3894	2.96131	2.6852	2.4343
5.66	2.25792	2.0259	2.1575	2.40488	3.0099	2.7955	2.56297	2.6875	2.3861	2.95019	2.6795	2.4295
5.66333	2.24407	2.0159	2.1499	2.39776	3.0006	2.7867	2.5571	2.6807	2.376	2.94616	2.6751	2.426
5.66667	2.22858	2.0051	2.1419	2.38446	2.9895	2.7754	2.543	2.6742	2.3691	2.9467	2.6703	2.4213
5.67	2.21675	1.9984	2.1337	2.37405	2.98	2.7665	2.53733	2.6666	2.3626	2.93748	2.6644	2.4173
5.67333	2.20807	1.9926	2.1269	2.36564	2.9704	2.7579	2.53553	2.6582	2.3564	2.93833	2.661	2.4146
5.67667	2.19007	1.9865	2.1212	2.35372	2.9624	2.7497	2.51686	2.6514	2.3463	2.93136	2.6564	2.4104
5.68	2.17745	1.9799	2.1145	2.34283	2.9505	2.7404	2.51178	2.6426	2.3425	2.92427	2.6512	2.4058
5.68333	2.16441	1.9711	2.1072	2.32934	2.9371	2.7328	2.50947	2.6355	2.337	2.92149	2.6466	2.4008
5.68667	2.15072	1.9645	2.1002	2.3118	2.9272	2.7241	2.48987	2.6286	2.3283	2.9196	2.6413	2.3954
5.69	2.14316	1.9558	2.0911	2.30952	2.9145	2.7135	2.48319	2.6217	2.3223	2.91339	2.6369	2.3901
5.69333	2.12167	1.9453	2.0853	2.28918	2.9019	2.7051	2.48227	2.6137	2.3156	2.91046	2.6318	2.3851
5.69667	2.11297	1.9394	2.0776	2.28569	2.8917	2.6971	2.46672	2.6082	2.3094	2.91292	2.6274	2.3795
5.7	2.09535	1.9311	2.0691	2.2774	2.8828	2.6884	2.45837	2.6003	2.3042	2.90191	2.621	2.3747
5.70333	2.08964	1.9192	2.0589	2.25751	2.8717	2.6808	2.45322	2.5927	2.3005	2.8961	2.6148	2.3703
5.70667	2.07655	1.9129	2.053	2.25498	2.8629	2.6738	2.44093	2.5855	2.2923	2.88803	2.6081	2.3672
5.71	2.06265	1.9053	2.0449	2.24245	2.8547	2.6664	2.43016	2.5777	2.2854	2.88643	2.6044	2.3638
5.71333	2.04878	1.8967	2.0368	2.23059	2.8458	2.6576	2.43192	2.5699	2.2779	2.88791	2.599	2.361
5.71667	2.03685	1.8914	2.0291	2.21833	2.8375	2.65	2.41748	2.5613	2.2697	2.88899	2.5942	2.3573
5.72	2.02325	1.8849	2.0216	2.21035	2.829	2.6395	2.41074	2.5523	2.2641	2.87258	2.5883	2.351
5.72333	2.01095	1.876	2.0133	2.19646	2.8191	2.629	2.40398	2.546	2.2581	2.86571	2.5841	2.3461
5.72667	2.00356	1.8709	2.0071	2.18248	2.8102	2.6216	2.39587	2.5401	2.2528	2.87286	2.5771	2.3414
5.73	1.98792	1.8626	1.999	2.17787	2.8012	2.6149	2.37892	2.5332	2.2448	2.86439	2.5727	2.3376
5.73333	1.97502	1.8551	1.9907	2.16318	2.7922	2.6054	2.37826	2.5262	2.2379	2.85921	2.5681	2.3346
5.73667	1.96279	1.8469	1.9837	2.1567	2.7814	2.6004	2.3699	2.5201	2.231	2.85337	2.5626	2.3314
5.74	1.95045	1.8392	1.9767	2.13903	2.7737	2.5929	2.36411	2.5122	2.2231	2.85141	2.5582	2.3273
5.74333	1.93539	1.8327	1.97	2.12956	2.7636	2.584	2.35515	2.5048	2.217	2.84842	2.5544	2.3235
5.74667	1.93017	1.8246	1.9633	2.12258	2.7534	2.5749	2.35165	2.4963	2.2144	2.83936	2.5486	2.3176
5.75	1.91807	1.8183	1.959	2.10899	2.7449	2.5688	2.33484	2.4903	2.2098	2.84687	2.5427	2.313
5.75333	1.90488	1.8113	1.9508	2.10426	2.7373	2.56	2.3294	2.4821	2.2027	2.83503	2.5387	2.309
5.75667	1.90019	1.8042	1.9455	2.08858	2.728	2.5541	2.32464	2.4737	2.1996	2.83121	2.5312	2.3044
5.76	1.8826	1.797	1.9359	2.08015	2.7209	2.5474	2.31046	2.4686	2.1915	2.83268	2.5259	2.2988
5.76333	1.87481	1.7909	1.9287	2.07172	2.7127	2.5415	2.30692	2.4615	2.1837	2.82404	2.5204	2.294
5.76667	1.86495	1.7831	1.9201	2.05863	2.7018	2.5335	2.296	2.4522	2.1788	2.82076	2.5176	2.2888
5.77	1.8558	1.775	1.912	2.05067	2.6937	2.5269	2.28701	2.4443	2.1739	2.81871	2.5134	2.284
5.77333	1.83523	1.7678	1.9026	2.04087	2.6864	2.5174	2.28249	2.4379	2.1658	2.81017	2.5107	2.2787
5.77667	1.82827	1.7598	1.8984	2.03221	2.6756	2.5098	2.27482	2.4298	2.1613	2.80145	2.5077	2.2752
5.78	1.81319	1.7529	1.8935	2.02324	2.6651	2.5024	2.26735	2.4236	2.1533	2.79794	2.5039	2.2738
5.78333	1.80574	1.745	1.8891	2.01134	2.6571	2.496	2.25488	2.4189	2.1456	2.80295	2.4977	2.2703
5.78667	1.79317	1.739	1.8821	1.99318	2.6486	2.4878	2.24766	2.4142	2.1394	2.7963	2.4929	2.2652
5.79	1.78643	1.7335	1.8769	1.98641	2.6395	2.4814	2.24229	2.4085	2.1332	2.79084	2.4881	2.2646
5.79333	1.77152	1.7288	1.8702	1.98567	2.6311	2.4734	2.22886	2.402	2.1291	2.78848	2.4828	2.2597
5.79667	1.76785	1.7239	1.863	1.97404	2.6248	2.4652	2.22753	2.3948	2.1254	2.78585	2.4783	2.2532
5.8	1.75501	1.7193	1.8551	1.96481	2.6163	2.4574	2.21789	2.3872	2.1184	2.7805	2.475	2.2488
5.80333	1.74486	1.7143	1.848	1.95264	2.6061	2.4482	2.20665	2.3799	2.114	2.77653	2.4685	2.2456
5.80667	1.73436	1.7088	1.8411	1.94569	2.5992	2.4422	2.20717	2.3735	2.1096	2.77487	2.4649	2.2395
5.81	1.72718	1.7008	1.8316	1.92921	2.593	2.4358	2.19576	2.3668	2.104	2.76247	2.4594	2.2355
5.81333	1.70702	1.6931	1.8248	1.92478	2.5857	2.4279	2.18401	2.3606	2.0967	2.76838	2.4551	2.2327
5.81667	1.70107	1.6863	1.8205	1.9142	2.5785	2.4207	2.18318	2.3553	2.0947	2.76543	2.4502	2.229
5.82	1.69012	1.6778	1.8139	1.90455	2.5709	2.4143	2.16836	2.3496	2.091	2.75872	2.4452	2.2242
5.82333	1.68586	1.6704	1.8072	1.88898	2.5631	2.4062	2.1569	2.3427	2.0831	2.756	2.4373	2.2209
5.82667	1.67061	1.6653	1.803	1.88531	2.5539	2.3984	2.16421	2.3372	2.077	2.75156	2.4331	2.2178
5.83	1.66472	1.6601	1.7961	1.87559	2.5449	2.3917	2.15123	2.3314	2.0734	2.74553	2.4285	2.2129
5.83333	1.6498	1.6539	1.7887	1.87352	2.5355	2.3849	2.14232	2.3228	2.0639	2.74356	2.423	2.2092
5.83667	1.64434	1.6478	1.7836	1.86565	2.5267	2.3783	2.13353	2.3167	2.0562	2.73771	2.4172	2.2039
5.84	1.63095	1.6433	1.7787	1.85235	2.5189	2.3707	2.13241	2.3104	2.0541	2.73504	2.416	2.1998
5.84333	1.62647	1.6376	1.7715	1.84212	2.511	2.3649	2.11722	2.304	2.0511	2.73318	2.412	2.1966
5.84667	1.6111	1.6321	1.7668	1.83616	2.5028	2.358	2.11168	2.2971	2.0458	2.73227	2.4077	2.1941
5.85	1.59799	1.6248	1.7596	1.82736	2.4956	2.3511	2.10634	2.2926	2.0424	2.71557	2.4045	2.1883
5.85333	1.59264	1.6161	1.7523	1.81883	2.4894	2.3433	2.0974	2.2853	2.0365	2.72326	2.402	2.1838
5.85667	1.58426	1.6088	1.7479	1.80874	2.4809	2.3374	2.085	2.2793	2.0292	2.71741	2.3977	2.1787
5.86	1.56966	1.6018	1.7454	1.79253	2.4739	2.3299	2.08578	2.2706	2.0259	2.71251	2.3927	2.1736
5.86333	1.56576	1.5948	1.7382	1.7877	2.4663	2.3225	2.08201	2.2648	2.0207	2.70965	2.3891	2.1694
5.86667	1.55846	1.5894	1.7335	1.78213	2.458	2.3156	2.06893	2.2597	2.0172	2.7055	2.3839	2.1665
5.87	1.54681	1.5837	1.7274	1.77438	2.4495	2.3094	2.06578	2.2547	2.0131	2.68971	2.3776	2.1647
5.87333	1.54145	1.5774	1.7194	1.76477	2.441	2.3033	2.05517	2.2485	2.0062	2.6978	2.3721	2.1614
5.87667	1.52685	1.5723	1.7137	1.76288	2.4332	2.2978	2.04751	2.2444	1.9993	2.69452	2.3695	2.1597
5.88	1.51676	1.5668	1.7097	1.75294	2.4268	2.2942	2.0415	2.2382	1.9962	2.68467	2.3644	2.1544
5.88333	1.51355	1.5633	1.7042	1.74245	2.4201	2.2891	2.03612	2.2325	1.9874	2.68383	2.3608	2.1511
5.88667	1.49893	1.5565	1.6989	1.72966	2.414	2.28	2.02686	2.2253	1.9793	2.67964	2.3569	2.1471
5.89	1.49047	1.5526	1.6943	1.71884	2.4055	2.2744	2.01946	2.2183	1.9746	2.6762	2.353	2.1465
5.89333	1.48536	1.5454	1.6877	1.71418	2.3975	2.2668	2.01614	2.2115	1.9679	2.67627	2.3473	2.1395
5.89667	1.47546	1.5397	1.6815	1.70712	2.3907	2.259	2.0057	2.2061	1.96	2.66892	2.3445	2.1373
5.9	1.46664	1.5324	1.6747	1.70466	2.3826	2.2546	1.99872	2.2002	1.9542	2.66931	2.3411	2.1329
5.90333	1.4602	1.5272	1.668	1.69395	2.3759	2.252	1.99761	2.1963	1.9506	2.66358	2.3346	2.1277
5.90667	1.44449	1.5211	1.6624	1.68896	2.3697	2.2446	1.98718	2.1919	1.9465	2.66528	2.3298	2.1218
5.91	1.44087	1.5165	1.6547	1.67686	2.3636	2.2388	1.98481	2.1853	1.9403	2.66002	2.3261	2.1209
5.91333	1.43018	1.5121	1.6479	1.66401	2.3558	2.2336	1.98239	2.1808	1.9336	2.65266	2.3198	2.117
5.91667	1.42099	1.5077	1.6419	1.66044	2.3506	2.2252	1.96867	2.1746	1.9311	2.64695	2.3137	2.114
5.92	1.41612	1.501	1.6357	1.65549	2.3425	2.2194	1.95746	2.1677	1.9259	2.64572	2.3108	2.1088
5.92333	1.40672	1.495	1.6275	1.64154	2.336	2.2148	1.95751	2.1623	1.9204	2.64012	2.3066	2.1042
5.92667	1.39608	1.4918	1.6263	1.63568	2.328	2.2078	1.94789	2.1558	1.9157	2.64629	2.3028	2.0997
5.93	1.38779	1.4866	1.6225	1.62834	2.3219	2.1996	1.94266	2.1478	1.913	2.63696	2.3	2.0963
5.93333	1.38095	1.4816	1.6192	1.62157	2.3135	2.1947	1.937	2.1419	1.9064	2.62793	2.2971	2.0934
5.93667	1.37259	1.4759	1.6119	1.60863	2.3087	2.1882	1.93575	2.1365	1.9012	2.63288	2.294	2.0923
5.94	1.36136	1.4726	1.6078	1.6105	2.3021	2.18	1.92629	2.1307	1.8961	2.63086	2.2906	2.0891
5.94333	1.35871	1.4659	1.6001	1.59898	2.2959	2.1731	1.92145	2.1261	1.891	2.61864	2.286	2.0856
5.94667	1.35469	1.4604	1.5928	1.5982	2.2905	2.1687	1.9085	2.1214	1.8852	2.61366	2.2798	2.0821
5.95	1.33863	1.4537	1.5873	1.58538	2.2804	2.1621	1.90071	2.1162	1.8812	2.62016	2.2758	2.0774
5.95333	1.33136	1.4495	1.5817	1.57154	2.2704	2.1569	1.90062	2.1115	1.8756	2.6109	2.2708	2.0724
5.95667	1.32995	1.4429	1.5778	1.56657	2.2617	2.1493	1.89801	2.1067	1.8738	2.60427	2.2654	2.0692
5.96	1.31918	1.4381	1.5696	1.56281	2.2537	2.1441	1.88536	2.1009	1.8697	2.60272	2.2615	2.068
5.96333	1.31255	1.431	1.5676	1.55409	2.245	2.1376	1.88286	2.0965	1.8665	2.59889	2.2581	2.0637
5.96667	1.30229	1.4265	1.5619	1.54804	2.2402	2.1317	1.87862	2.0916	1.8636	2.59314	2.2534	2.0623
5.97	1.29523	1.4217	1.5557	1.54446	2.2345	2.1243	1.86423	2.0866	1.8599	2.59667	2.2485	2.0589
5.97333	1.28929	1.4186	1.5508	1.53369	2.2281	2.1221	1.85881	2.0822	1.8527	2.5928	2.2456	2.0572
5.97667	1.28526	1.4123	1.5493	1.52372	2.2207	2.116	1.86825	2.0778	1.8492	2.5829	2.2413	2.0517
5.98	1.26838	1.409	1.5402	1.52079	2.2129	2.1106	1.84681	2.0724	1.8447	2.58358	2.2381	2.0481
5.98333	1.26416	1.4029	1.5327	1.51414	2.2058	2.104	1.84206	2.0651	1.8401	2.57733	2.2358	2.0427
5.98667	1.25651	1.3947	1.5297	1.50803	2.2011	2.0994	1.84316	2.0592	1.8339	2.56962	2.2316	2.0402
5.99	1.25029	1.3885	1.5222	1.50037	2.195	2.0915	1.83167	2.0534	1.8301	2.57412	2.2282	2.0357
5.99333	1.24535	1.3836	1.5166	1.49264	2.1902	2.088	1.82461	2.0488	1.8262	2.56999	2.2245	2.0326
5.99667	1.23714	1.3794	1.5135	1.48286	2.1843	2.0828	1.82936	2.0427	1.8199	2.56182	2.2198	2.0306
6	1.22829	1.3753	1.5078	1.47821	2.1782	2.0768	1.8163	2.0368	1.8118	2.5701	2.2148	2.0291
6.00333	1.22314	1.3718	1.5016	1.47338	2.1678	2.0702	1.81006	2.0317	1.8074	2.56431	2.2102	2.0239
6.00667	1.21763	1.3651	1.5	1.46487	2.1617	2.0665	1.80499	2.0259	1.8026	2.55655	2.2057	2.0212
6.01	1.20977	1.3598	1.4933	1.45752	2.1549	2.0609	1.80196	2.0195	1.7946	2.55465	2.202	2.016
6.01333	1.20196	1.3542	1.4888	1.45345	2.1484	2.0546	1.79243	2.0148	1.7918	2.55174	2.1978	2.0133
6.01667	1.19166	1.3491	1.4888	1.44654	2.1423	2.0519	1.79182	2.0115	1.7903	2.54915	2.1934	2.0094
6.02	1.18731	1.3439	1.4856	1.43719	2.1369	2.0464	1.78792	2.0036	1.7861	2.54632	2.1905	2.0053
6.02333	1.18293	1.3416	1.4778	1.4348	2.1314	2.0416	1.77699	1.9985	1.7817	2.54395	2.1876	2.0023
6.02667	1.17336	1.3377	1.4732	1.42524	2.1252	2.0364	1.77261	1.9933	1.7784	2.5374	2.1825	2.0003
6.03	1.1628	1.3329	1.4702	1.41599	2.1175	2.0304	1.76421	1.9881	1.7729	2.52913	2.1799	1.9958
6.03333	1.15547	1.328	1.465	1.41141	2.1118	2.024	1.75727	1.9821	1.7682	2.53423	2.1764	1.994
6.03667	1.15118	1.3223	1.4578	1.40644	2.1059	2.0194	1.75637	1.978	1.7643	2.5301	2.1736	1.9935
6.04	1.14406	1.3157	1.4557	1.40321	2.0973	2.0135	1.75194	1.974	1.7595	2.52137	2.1677	1.9896
6.04333	1.14	1.3093	1.4529	1.38981	2.0904	2.0048	1.74199	1.9702	1.7581	2.5244	2.1654	1.9872
6.04667	1.13384	1.3044	1.4475	1.38379	2.086	2.0014	1.73912	1.9652	1.7542	2.51626	2.1598	1.9851
6.05	1.12593	1.2992	1.4401	1.38437	2.0798	1.9972	1.73452	1.9609	1.7501	2.51311	2.1568	1.9798
6.05333	1.11283	1.2938	1.4381	1.37649	2.0725	1.9929	1.72729	1.9578	1.745	2.5148	2.1508	1.9736
6.05667	1.11542	1.29	1.4325	1.36823	2.0669	1.9868	1.72457	1.952	1.7411	2.5093	2.1499	1.9708
6.06	1.10239	1.2872	1.4274	1.35914	2.0609	1.984	1.72429	1.9457	1.7348	2.50477	2.1473	1.9671
6.06333	1.0961	1.2826	1.4212	1.35424	2.0552	1.9783	1.71304	1.9422	1.7322	2.51324	2.1448	1.9643
6.06667	1.09461	1.2801	1.4197	1.34652	2.0471	1.9735	1.70644	1.9378	1.7277	2.50349	2.1386	1.961
6.07	1.08461	1.2779	1.4135	1.34481	2.0421	1.9656	1.70497	1.9325	1.725	2.49323	2.1342	1.9578
6.07333	1.07793	1.2738	1.41	1.33636	2.0375	1.9612	1.70184	1.9289	1.7226	2.49806	2.1301	1.9542
6.07667	1.07026	1.2722	1.4058	1.33226	2.0286	1.9559	1.69009	1.9246	1.7162	2.48807	2.1244	1.952
6.08	1.06485	1.2686	1.4008	1.32273	2.0225	1.9504	1.68929	1.9198	1.7104	2.4867	2.12	1.9482
6.08333	1.06549	1.2632	1.3937	1.31867	2.0186	1.946	1.68367	1.9138	1.7057	2.48796	2.1185	1.9438
6.08667	1.05379	1.2557	1.3867	1.31899	2.0124	1.9415	1.67455	1.9101	1.7	2.48716	2.1164	1.9408
6.09	1.04401	1.2501	1.3812	1.30385	2.005	1.9359	1.67883	1.9053	1.6937	2.47669	2.1101	1.938
6.09333	1.04478	1.2435	1.3762	1.30067	2.0015	1.9314	1.67399	1.8997	1.6921	2.47549	2.1073	1.9338
6.09667	1.03396	1.2379	1.372	1.29431	1.9944	1.9274	1.65666	1.8945	1.6871	2.47654	2.1076	1.9301
6.1	1.02694	1.2335	1.3701	1.29119	1.9882	1.9191	1.65686	1.8898	1.6852	2.46401	2.1055	1.9298
6.10333	1.02285	1.2311	1.3674	1.28123	1.9801	1.9148	1.65657	1.885	1.6825	2.46616	2.0992	1.925
6.10667	1.01664	1.2307	1.3645	1.28038	1.976	1.9101	1.64014	1.8802	1.6786	2.46894	2.0973	1.9222
6.11	1.01657	1.2261	1.3608	1.27605	1.9705	1.9063	1.63964	1.8765	1.6759	2.46214	2.0955	1.9189
6.11333	1.00308	1.2218	1.3589	1.2671	1.9652	1.9025	1.64143	1.871	1.6746	2.46002	2.0914	1.9149
6.11667	1.0021	1.218	1.3534	1.25866	1.9573	1.8969	1.6341	1.8675	1.671	2.45696	2.0887	1.9092
6.12	0.992826	1.2093	1.3473	1.25621	1.9564	1.8931	1.62331	1.8622	1.6647	2.45445	2.0859	1.9087
6.12333	0.984785	1.201	1.3428	1.25163	1.9497	1.8864	1.62296	1.8568	1.6615	2.44776	2.0838	1.9049
6.12667	0.981972	1.1955	1.3398	1.24053	1.9438	1.8816	1.61544	1.8529	1.6581	2.45344	2.0784	1.9015
6.13	0.977846	1.1896	1.3338	1.23952	1.9399	1.8743	1.61199	1.8494	1.651	2.44247	2.0731	1.9001
6.13333	0.975199	1.1837	1.3304	1.23562	1.935	1.8711	1.61066	1.8438	1.644	2.43467	2.0678	1.8981
6.13667	0.970327	1.1822	1.3275	1.23077	1.9263	1.8663	1.60786	1.8406	1.6423	2.4402	2.0653	1.8925
6.14	0.958598	1.1786	1.3227	1.2244	1.9207	1.8638	1.59732	1.8368	1.6383	2.43752	2.0616	1.891
6.14333	0.958087	1.176	1.3198	1.22201	1.9136	1.8602	1.6009	1.8308	1.6353	2.42713	2.059	1.8878
6.14667	0.948567	1.1734	1.3162	1.20488	1.9063	1.8586	1.59096	1.8277	1.634	2.43362	2.0565	1.8845
6.15	0.939638	1.1709	1.3124	1.20227	1.9009	1.8525	1.58663	1.8222	1.6329	2.42818	2.0523	1.8825
6.15333	0.935991	1.1659	1.3058	1.20035	1.896	1.8479	1.58428	1.8165	1.629	2.42586	2.0501	1.8802
6.15667	0.930802	1.1623	1.3007	1.19099	1.8897	1.8432	1.57888	1.812	1.6249	2.42275	2.047	1.8753
6.16	0.926587	1.1575	1.2961	1.18985	1.884	1.837	1.57038	1.8091	1.6183	2.41755	2.0421	1.8744
6.16333	0.92595	1.1518	1.2926	1.18419	1.88	1.8327	1.5673	1.8024	1.612	2.41227	2.0394	1.872
6.16667	0.915718	1.1485	1.2894	1.17807	1.8751	1.8294	1.56535	1.8001	1.608	2.40601	2.0359	1.8678
6.17	0.915127	1.1455	1.2874	1.17451	1.8693	1.8251	1.55469	1.7971	1.6039	2.40898	2.0308	1.8657
6.17333	0.906335	1.1413	1.2842	1.16851	1.8641	1.8207	1.55697	1.794	1.6	2.40573	2.0247	1.862
6.17667	0.897449	1.1372	1.2782	1.16689	1.8603	1.8156	1.55467	1.7901	1.5958	2.40684	2.022	1.8593
6.18	0.896049	1.137	1.2726	1.15462	1.8546	1.8116	1.54382	1.7876	1.5933	2.4042	2.0178	1.8555
6.18333	0.892072	1.1328	1.2677	1.15576	1.8493	1.8088	1.53633	1.7836	1.5875	2.40115	2.0165	1.8533
6.18667	0.884153	1.129	1.2623	1.15099	1.8441	1.8053	1.53839	1.7785	1.586	2.39627	2.0113	1.849
6.19	0.877343	1.1249	1.2593	1.14378	1.8407	1.7991	1.53174	1.773	1.582	2.39515	2.0096	1.8469
6.19333	0.873511	1.122	1.2563	1.13876	1.8356	1.7962	1.52743	1.7692	1.5812	2.3916	2.0083	1.8429
6.19667	0.869125	1.1176	1.2552	1.13183	1.8305	1.7907	1.52222	1.7624	1.578	2.38568	2.0046	1.8402
6.2	0.859154	1.1153	1.2521	1.13154	1.8255	1.7866	1.51678	1.7575	1.5782	2.38355	2.0012	1.8369
6.20333	0.85762	1.11	1.2497	1.12151	1.8204	1.7806	1.51504	1.7538	1.573	2.38548	1.9985	1.8338
6.20667	0.848172	1.1048	1.2453	1.12007	1.8127	1.7775	1.51028	1.7503	1.5701	2.37448	1.9987	1.8314
6.21	0.845893	1.0979	1.2418	1.11733	1.8066	1.7732	1.50561	1.7459	1.5664	2.37895	1.995	1.8282
6.21333	0.848292	1.0921	1.2368	1.11072	1.8018	1.7675	1.49997	1.7453	1.5645	2.37012	1.9926	1.8263
6.21667	0.836642	1.0854	1.2322	1.1055	1.7945	1.7635	1.49455	1.7413	1.5592	2.36988	1.9889	1.823
6.22	0.827434	1.082	1.229	1.09803	1.7917	1.759	1.49562	1.7366	1.5556	2.36768	1.9885	1.8206
6.22333	0.828769	1.08	1.2268	1.09385	1.7898	1.756	1.48623	1.7334	1.5501	2.36749	1.9829	1.8166
6.22667	0.826949	1.0787	1.2232	1.09151	1.7833	1.7503	1.48633	1.7294	1.5434	2.35765	1.9797	1.8145
6.23	0.812809	1.0761	1.2201	1.08628	1.7785	1.7475	1.48198	1.7247	1.5412	2.36359	1.9756	1.8102
6.23333	0.808334	1.0737	1.2139	1.08549	1.7758	1.742	1.47546	1.7215	1.5353	2.3594	1.9729	1.8071
6.23667	0.812272	1.0679	1.2101	1.07719	1.7681	1.7368	1.47351	1.716	1.5329	2.34489	1.9692	1.8046
6.24	0.804296	1.0646	1.2051	1.07656	1.7593	1.7328	1.47372	1.7109	1.5299	2.35406	1.9654	1.8009
6.24333	0.802945	1.0601	1.1992	1.06749	1.7557	1.7292	1.45667	1.707	1.5276	2.35283	1.9609	1.7983
6.24667	0.793908	1.0582	1.1944	1.06287	1.7475	1.7249	1.4593	1.704	1.5214	2.34947	1.9587	1.7958
6.25	0.788772	1.053	1.1923	1.0555	1.7421	1.7213	1.45882	1.6997	1.5206	2.34582	1.9565	1.7942
6.25333	0.78201	1.0519	1.1883	1.0548	1.7373	1.7173	1.44467	1.6978	1.5169	2.34427	1.9544	1.7916
6.25667	0.781959	1.045	1.183	1.049	1.7353	1.7123	1.44587	1.6948	1.5166	2.34441	1.95	1.7893
6.26	0.774895	1.0418	1.1825	1.04226	1.7289	1.7096	1.4483	1.6916	1.5154	2.33449	1.9481	1.7848
6.26333	0.769448	1.0342	1.1798	1.04003	1.7251	1.7054	1.43983	1.6868	1.511	2.33861	1.9458	1.7826
6.26667	0.767735	1.0337	1.1756	1.03628	1.722	1.7013	1.43615	1.6835	1.5072	2.32964	1.9419	1.7815
6.27	0.757811	1.0306	1.1682	1.03046	1.7177	1.6987	1.43409	1.6785	1.5039	2.33337	1.9344	1.7787
6.27333	0.755143	1.029	1.1671	1.02491	1.7113	1.6941	1.4279	1.6761	1.4966	2.33258	1.9329	1.7759
6.27667	0.756524	1.0254	1.1608	1.02032	1.7075	1.6909	1.4231	1.6709	1.4928	2.32366	1.9295	1.773
6.28	0.745048	1.0235	1.1578	1.01565	1.7022	1.6874	1.42498	1.6664	1.4898	2.31953	1.9256	1.7711
6.28333	0.74638	1.0165	1.1554	1.01033	1.695	1.6834	1.41913	1.6627	1.4866	2.32129	1.9231	1.7667
6.28667	0.733121	1.0119	1.154	1.00718	1.6883	1.6795	1.41137	1.6583	1.4838	2.31513	1.9233	1.7642
6.29	0.73198	1.009	1.1511	1.00373	1.683	1.6754	1.41384	1.6536	1.4839	2.31299	1.9193	1.7622
6.29333	0.729099	1.0068	1.1512	0.997883	1.6774	1.6713	1.41367	1.6508	1.4783	2.31009	1.9161	1.7605
6.29667	0.728162	1.0053	1.1471	0.992358	1.6739	1.6667	1.40197	1.6461	1.4774	2.31048	1.9142	1.7582
6.3	0.722019	1.0027	1.144	0.992636	1.6705	1.6637	1.40651	1.6425	1.4757	2.30523	1.9118	1.7549
6.30333	0.716101	0.9969	1.1404	0.985582	1.667	1.6596	1.39846	1.6396	1.4707	2.30813	1.9073	1.752
6.30667	0.704174	0.9913	1.1382	0.982453	1.6634	1.6568	1.39133	1.636	1.4685	2.31337	1.9064	1.7494
6.31	0.708222	0.985	1.1326	0.973449	1.6591	1.6533	1.39105	1.6315	1.4673	2.29814	1.9044	1.7453
6.31333	0.703933	0.9792	1.1281	0.975043	1.6528	1.6514	1.3826	1.6303	1.4649	2.29145	1.9012	1.7435
6.31667	0.69551	0.9754	1.1259	0.970499	1.6472	1.6476	1.37413	1.6271	1.4599	2.29693	1.8955	1.7416
6.32	0.696692	0.9733	1.1225	0.966881	1.6415	1.6447	1.37557	1.624	1.4559	2.28593	1.8943	1.7382
6.32333	0.689716	0.9717	1.1175	0.960785	1.6362	1.6398	1.36963	1.6182	1.4492	2.29194	1.8916	1.7366
6.32667	0.684331	0.9685	1.1141	0.952556	1.6337	1.6337	1.36697	1.6156	1.4434	2.29235	1.8886	1.7368
6.33	0.683347	0.9637	1.1113	0.952652	1.6294	1.6289	1.36459	1.6108	1.4346	2.28783	1.8853	1.7321
6.33333	0.682604	0.9618	1.1056	0.944883	1.6243	1.6247	1.36408	1.6076	1.4304	2.28563	1.8846	1.7288
6.33667	0.670484	0.9601	1.103	0.938128	1.6195	1.6198	1.35625	1.6033	1.4288	2.28444	1.8797	1.7274
6.34	0.670306	0.9567	1.0986	0.940728	1.6161	1.6173	1.35614	1.5995	1.4266	2.27517	1.8761	1.7212
6.34333	0.663964	0.955	1.0958	0.93306	1.6111	1.6142	1.35013	1.5939	1.4248	2.27669	1.8741	1.7171
6.34667	0.66321	0.9533	1.0925	0.930061	1.6061	1.6118	1.35412	1.5912	1.4282	2.27883	1.8714	1.7149
6.35	0.65335	0.9481	1.0906	0.932278	1.6032	1.6092	1.34621	1.5855	1.4273	2.27163	1.8667	1.713
6.35333	0.649518	0.9443	1.085	0.924913	1.5994	1.6061	1.3432	1.5838	1.4231	2.27042	1.8662	1.7098
6.35667	0.647963	0.9401	1.0812	0.915773	1.5915	1.6022	1.33743	1.5812	1.4222	2.26839	1.8628	1.7083
6.36	0.644228	0.9373	1.0767	0.915092	1.5865	1.5999	1.33463	1.58	1.42	2.27125	1.8595	1.7092
6.36333	0.638881	0.9342	1.0743	0.9109	1.5842	1.594	1.33478	1.5765	1.4142	2.26138	1.8559	1.7077
6.36667	0.633001	0.9332	1.0705	0.90759	1.5776	1.5901	1.32989	1.574	1.4095	2.26019	1.8561	1.7063
6.37	0.634198	0.9304	1.0693	0.90292	1.5723	1.5867	1.31921	1.5706	1.4066	2.26094	1.8527	1.7043
6.37333	0.629812	0.9275	1.066	0.897041	1.5689	1.5828	1.32708	1.5693	1.4	2.25382	1.8488	1.7022
6.37667	0.623284	0.9234	1.0651	0.901911	1.5634	1.5785	1.32183	1.5641	1.3969	2.25637	1.8457	1.6959
6.38	0.617952	0.9214	1.0616	0.889224	1.5575	1.5766	1.31038	1.5606	1.3943	2.25581	1.844	1.6927
6.38333	0.615547	0.9182	1.0601	0.889776	1.5553	1.5728	1.31485	1.5579	1.3904	2.25386	1.841	1.6905
6.38667	0.613574	0.9133	1.0548	0.888379	1.5519	1.5696	1.30905	1.554	1.3862	2.24664	1.8376	1.6868
6.39	0.609683	0.9094	1.0513	0.883155	1.5484	1.5674	1.30204	1.5486	1.3864	2.24668	1.8345	1.6832
6.39333	0.604542	0.9073	1.0501	0.878142	1.5433	1.5639	1.29986	1.5456	1.3811	2.2388	1.8327	1.6821
6.39667	0.600201	0.9037	1.0472	0.870008	1.5387	1.5598	1.29569	1.5411	1.3789	2.23823	1.8295	1.6795
6.4	0.596962	0.9004	1.0429	0.866916	1.5325	1.5568	1.28868	1.5378	1.3773	2.24261	1.8269	1.6753
6.40333	0.595593	0.8975	1.0393	0.86673	1.5287	1.5514	1.29052	1.5338	1.3756	2.23128	1.8261	1.6724
6.40667	0.587248	0.8938	1.038	0.859908	1.5217	1.5477	1.28849	1.5315	1.3712	2.23172	1.8243	1.6704
6.41	0.584719	0.8934	1.0331	0.864956	1.5202	1.5434	1.28562	1.5291	1.37	2.23269	1.8211	1.6668
6.41333	0.583711	0.8885	1.0277	0.852749	1.5149	1.5404	1.27692	1.5261	1.3673	2.23282	1.8184	1.6655
6.41667	0.581269	0.8868	1.0232	0.851756	1.5103	1.538	1.2798	1.5231	1.364	2.22129	1.8152	1.6647
6.42	0.577065	0.8828	1.0217	0.846915	1.5049	1.5375	1.27758	1.5201	1.3637	2.22941	1.8116	1.6641
6.42333	0.571097	0.8807	1.0158	0.844459	1.5048	1.5333	1.26352	1.5167	1.3617	2.22443	1.8073	1.6615
6.42667	0.57259	0.8743	1.0169	0.837738	1.4978	1.5301	1.26847	1.5146	1.3611	2.2177	1.8047	1.6604
6.43	0.560532	0.873	1.0124	0.836252	1.4932	1.5268	1.26726	1.5103	1.3534	2.2219	1.8021	1.6556
6.43333	0.56058	0.8677	1.0135	0.8347	1.491	1.5217	1.25344	1.5066	1.3506	2.22281	1.7993	1.6527
6.43667	0.561901	0.8659	1.0087	0.831476	1.4884	1.5176	1.24868	1.502	1.3462	2.21516	1.7948	1.6495
6.44	0.554214	0.8609	1.0083	0.822021	1.4824	1.5141	1.25314	1.4998	1.343	2.21049	1.7933	1.6485
6.44333	0.553496	0.8577	1.0014	0.82369	1.4787	1.51	1.24752	1.4953	1.337	2.21219	1.7907	1.6471
6.44667	0.548477	0.8542	1.004	0.819739	1.4752	1.5064	1.24991	1.4945	1.3394	2.20167	1.7875	1.6455
6.45	0.54123	0.8503	1.0007	0.814319	1.468	1.5044	1.24376	1.4907	1.3385	2.20437	1.7835	1.643
6.45333	0.540383	0.848	1.0009	0.811645	1.4623	1.501	1.23459	1.4885	1.3352	2.20329	1.7834	1.6423
6.45667	0.538604	0.846	0.999	0.810417	1.4574	1.497	1.2402	1.4836	1.335	2.19726	1.7808	1.6407
6.46	0.52937	0.8436	0.9958	0.804599	1.4541	1.493	1.23617	1.4809	1.3334	2.20224	1.7785	1.638
6.46333	0.527762	0.8422	0.9917	0.799839	1.4515	1.49	1.23009	1.4759	1.3295	2.19725	1.7766	1.6358
6.46667	0.524495	0.8424	0.9861	0.797391	1.4495	1.4836	1.22921	1.4719	1.3265	2.19222	1.7767	1.6332
6.47	0.521093	0.839	0.9821	0.791976	1.4459	1.4797	1.22379	1.4697	1.324	2.19361	1.7741	1.6297
6.47333	0.516481	0.8363	0.9778	0.789896	1.4421	1.4783	1.2209	1.4689	1.3206	2.19088	1.7699	1.6257
6.47667	0.518445	0.8337	0.9731	0.784961	1.4373	1.4782	1.21807	1.4662	1.3169	2.18445	1.7678	1.6234
6.48	0.509909	0.8296	0.9707	0.782557	1.4324	1.4735	1.21803	1.4637	1.3139	2.18365	1.767	1.6203
6.48333	0.510971	0.826	0.9699	0.779292	1.4298	1.47	1.21165	1.4622	1.3116	2.18709	1.7615	1.6188
6.48667	0.508781	0.8245	0.9675	0.779035	1.4243	1.4691	1.20947	1.459	1.3086	2.18211	1.7589	1.6172
6.49	0.500531	0.8225	0.9611	0.771426	1.4208	1.4643	1.20597	1.4547	1.3059	2.18313	1.7573	1.6141
6.49333	0.49945	0.819	0.9585	0.768758	1.4163	1.4602	1.20148	1.4517	1.3045	2.18092	1.7542	1.6106
6.49667	0.502318	0.8158	0.9538	0.765604	1.4136	1.4583	1.20383	1.4487	1.2998	2.1735	1.7501	1.6104
6.5	0.49346	0.8104	0.9477	0.766549	1.4095	1.4584	1.20282	1.4466	1.2941	2.17385	1.7509	1.6066
6.50333	0.486982	0.8068	0.9427	0.760396	1.4062	1.4536	1.1967	1.4439	1.2924	2.17708	1.7489	1.604
6.50667	0.48361	0.8035	0.9455	0.758133	1.4047	1.4512	1.18883	1.4417	1.2879	2.17468	1.7451	1.6025
6.51	0.47986	0.8012	0.9453	0.755068	1.4	1.4483	1.19753	1.4369	1.2858	2.16585	1.743	1.6018
6.51333	0.475696	0.7987	0.9408	0.750306	1.3949	1.4464	1.1887	1.435	1.2846	2.16685	1.742	1.6
6.51667	0.477197	0.7981	0.9426	0.744172	1.3903	1.443	1.18444	1.4313	1.2824	2.16823	1.7385	1.5988
6.52	0.471874	0.794	0.941	0.74285	1.3889	1.4401	1.1831	1.4262	1.2805	2.16244	1.7346	1.5966
6.52333	0.467731	0.7906	0.9353	0.742509	1.3807	1.4368	1.17752	1.422	1.2758	2.1554	1.7341	1.5915
6.52667	0.467385	0.7875	0.9297	0.742356	1.3793	1.4322	1.16769	1.4206	1.2742	2.15995	1.7314	1.5882
6.53	0.467693	0.785	0.9294	0.734223	1.3765	1.4284	1.179	1.4178	1.274	2.14655	1.7282	1.5846
6.53333	0.460098	0.7816	0.9252	0.726844	1.3711	1.425	1.16848	1.4141	1.2742	2.14979	1.7251	1.583
6.53667	0.451761	0.7798	0.9214	0.73201	1.3644	1.4226	1.16676	1.4138	1.2717	2.15931	1.7244	1.5811
6.54	0.451573	0.7752	0.9186	0.728436	1.3621	1.4205	1.16328	1.4101	1.2703	2.14998	1.722	1.58
6.54333	0.449152	0.7713	0.919	0.721102	1.3566	1.4182	1.16154	1.4084	1.2668	2.14877	1.7183	1.5781
6.54667	0.44546	0.771	0.9156	0.720363	1.3538	1.4147	1.15927	1.4039	1.2605	2.14222	1.7165	1.5763
6.55	0.444463	0.7713	0.9127	0.716149	1.3499	1.4108	1.15758	1.4005	1.2575	2.14285	1.7159	1.5736
6.55333	0.435211	0.7701	0.9129	0.715531	1.3465	1.4077	1.15631	1.3965	1.2551	2.14391	1.7135	1.5712
6.55667	0.436284	0.7698	0.9103	0.712497	1.3422	1.405	1.14705	1.394	1.2536	2.1403	1.7094	1.5701
6.56	0.433656	0.7704	0.9076	0.705064	1.3408	1.4035	1.1477	1.3891	1.2511	2.14208	1.709	1.5667
6.56333	0.4324	0.7675	0.9067	0.705089	1.3352	1.4013	1.15099	1.3876	1.251	2.13296	1.7072	1.5638
6.56667	0.430776	0.761	0.9029	0.699001	1.3312	1.3983	1.14092	1.3851	1.2458	2.13805	1.7038	1.5621
6.57	0.421944	0.7581	0.9	0.700938	1.3262	1.3945	1.13145	1.3832	1.2443	2.13556	1.7007	1.5585
6.57333	0.424648	0.7534	0.8986	0.695086	1.3235	1.3905	1.13276	1.3813	1.2429	2.13471	1.7	1.5563
6.57667	0.411099	0.7483	0.8959	0.691285	1.318	1.3874	1.13565	1.3813	1.2396	2.13259	1.6972	1.5557
6.58	0.414859	0.7449	0.8939	0.690934	1.3137	1.3832	1.13212	1.3773	1.2357	2.13151	1.6937	1.5538
6.58333	0.408743	0.7457	0.8922	0.690659	1.3118	1.3807	1.13129	1.3755	1.2328	2.12876	1.6902	1.5504
6.58667	0.414618	0.7426	0.8892	0.682504	1.3101	1.3801	1.12936	1.3733	1.2297	2.12544	1.689	1.5493
6.59	0.405193	0.7394	0.8828	0.677485	1.3053	1.3788	1.12007	1.3705	1.227	2.12387	1.6853	1.5481
6.59333	0.401452	0.7391	0.8825	0.678982	1.3019	1.3769	1.12135	1.3658	1.2248	2.11452	1.683	1.5459
6.59667	0.403294	0.7361	0.8795	0.672272	1.2988	1.3742	1.12109	1.3639	1.2228	2.11654	1.6813	1.5453
6.6	0.398352	0.7319	0.8781	0.677052	1.2937	1.3731	1.11122	1.3615	1.2243	2.12133	1.6803	1.5442
6.60333	0.39164	0.7292	0.8759	0.664218	1.2915	1.3696	1.11495	1.3578	1.2206	2.11067	1.6767	1.5435
6.60667	0.392827	0.7274	0.878	0.665842	1.2883	1.3663	1.11547	1.3547	1.2184	2.11019	1.6746	1.5416
6.61	0.39438	0.7218	0.8742	0.666348	1.2871	1.3629	1.10174	1.3522	1.2155	2.11436	1.673	1.5384
6.61333	0.389597	0.7194	0.8695	0.662616	1.2832	1.3603	1.1105	1.3492	1.2111	2.11465	1.6701	1.5347
6.61667	0.388864	0.7189	0.8677	0.658336	1.2822	1.3568	1.10271	1.3466	1.2049	2.10452	1.667	1.5322
6.62	0.380457	0.7187	0.8662	0.660798	1.2766	1.3533	1.09495	1.3432	1.2028	2.10586	1.6661	1.5299
6.62333	0.379801	0.7168	0.8649	0.65365	1.2734	1.3485	1.09741	1.3407	1.1995	2.09972	1.665	1.5273
6.62667	0.377185	0.7169	0.8593	0.648411	1.2685	1.3462	1.09814	1.3392	1.1986	2.10423	1.6614	1.5273
6.63	0.375616	0.7147	0.8586	0.64789	1.2659	1.3436	1.09105	1.3365	1.1976	2.10107	1.6609	1.5266
6.63333	0.370078	0.7091	0.8538	0.641872	1.2594	1.3415	1.09142	1.3335	1.1999	2.0974	1.6598	1.5253
6.63667	0.372314	0.7045	0.8492	0.636538	1.2561	1.3398	1.09298	1.3319	1.1966	2.09046	1.6572	1.5222
6.64	0.367741	0.7021	0.8455	0.638623	1.2521	1.3381	1.08902	1.3303	1.1959	2.10099	1.6533	1.5192
6.64333	0.361111	0.6979	0.8448	0.63721	1.2487	1.3364	1.08095	1.3268	1.1933	2.09742	1.6531	1.5171
6.64667	0.361376	0.6963	0.8414	0.636077	1.2457	1.3334	1.08199	1.324	1.1921	2.09072	1.6504	1.5162
6.65	0.3578	0.6958	0.8375	0.630541	1.2438	1.3302	1.08082	1.3204	1.19	2.08718	1.6485	1.5141
6.65333	0.355167	0.6933	0.8378	0.626574	1.2393	1.3268	1.0726	1.3186	1.1876	2.09703	1.6463	1.5129
6.65667	0.354066	0.6915	0.8337	0.625672	1.2365	1.3252	1.07483	1.3161	1.1859	2.08738	1.6446	1.5108
6.66	0.345033	0.6889	0.8309	0.625954	1.2323	1.321	1.06826	1.3137	1.1803	2.08077	1.6418	1.5084
[truncated: 5,802 more rows]
