# Supplementary material for: Early steps of protein disaggregation by Hsp70 chaperone and class B J-domain proteins are shaped by Hsp110
Source: eLife. 2024 Oct 15;13:RP94795. doi: 10.7554/eLife.94795 (PMC11479587; doi:10.7554/eLife.94795)
Supplement: Figure 4—figure supplement 1—source data 2. [file elife-94795-fig4-figsupp1-data2.xlsx]

## Sheet: Figure 4—figure supplement 1B
µM	Sse1 WT			Sse1-2
0	3.13197	3.15334	3.18792	3.14043	3.7822	3.6033
0.1	3.03984	3.0381	3.00612
0.25	2.68448	2.56906	2.58639
0.5	2.1184	2.11698	1.96395
0.75	1.47716	1.59813	1.50965
1	1.26389	1.33724	1.3432	3.04305	3.6804	3.7416
2				2.82133	3.3615	3.0489
4				2.42056	2.9678	2.6513
