# Supplementary material for: Early steps of protein disaggregation by Hsp70 chaperone and class B J-domain proteins are shaped by Hsp110
Source: eLife. 2024 Oct 15;13:RP94795. doi: 10.7554/eLife.94795 (PMC11479587; doi:10.7554/eLife.94795)
Supplement: Figure 4—figure supplement 1—source data 3. [file elife-94795-fig4-figsupp1-data3.xlsx]

## Sheet: Figure 4—figure supplement 1C
Time (min)	1uM Hsc70			1uM Hsc70, 0,1uM Hsp105			1uM Hsc70, 0,5uM Hsp105			1uM Hsc70, 1uM Hsp105
0	0	0	0	0	0	0	0	0	0	0	0	0
0.003333	3e-05	0.00107	-0.0017	-0.0008	0.00171	0.00056	0.00164	-0.00021	0.00164	-0.0001	0.0017	-0.00018
0.006667	0.00038	0.00108	-0.0005	-0.0015	0.00125	0.00043	0.00127	-0.00191	-0.00249	-0.0014	0.0031	-0.00134
0.01	-0.00236	0.00196	-0.0007	-0.0002	0.00057	0.00056	0.00162	-0.00028	-0.00171	0.0013	0.0048	-0.00133
0.013333	-0.00205	0.00298	0	-0.0002	-0.00052	-0.00042	-0.00137	-0.00054	-0.0023	-0.001	0.0036	-0.0019
0.016667	-0.00442	0.00115	-0.0002	-0.0012	0.00362	-0.00116	0.00096	0.00089	-0.00209	0.0029	0.0033	-0.00118
0.02	-0.00456	0.00034	0.0019	-0.0008	0.0035	-0.00097	0.00228	-0.00039	-0.00302	0.0036	0.0043	-0.0009
0.023333	-0.00498	0.00069	0.0035	-0.002	0.00394	-0.00131	0.00452	-0.00058	7e-05	0.004	0.0029	0.00053
0.026667	-0.00456	-0.00147	0.0058	-0.0011	0.00503	-0.00134	0.00488	-0.00214	-0.0002	0.0039	0.0021	0.00059
0.03	-0.00364	-0.0009	0.0052	0.0004	0.00366	-0.00035	0.00839	-0.00367	0.00207	0.0022	0.0017	-0.00184
0.033333	-0.00435	-0.0003	0.0061	-0.0001	-0.00068	0.00057	0.0058	-0.00439	0.0017	-0.0017	0.0013	-0.00152
0.036667	-0.00283	-0.00135	0.0045	-0.0023	-0.00234	0.00012	0.00313	-0.00495	0.00152	-0.0051	-0.0015	-0.00096
0.04	-0.00259	0.00029	0.0031	-0.0028	-0.00277	-0.00109	0.00153	-0.00496	-0.00133	-0.0058	-0.0014	-0.00239
0.043333	-0.00172	0.00012	0.0011	-0.0036	-0.00344	-0.00173	-0.00101	-0.00399	-0.00414	-0.0058	-0.0008	-0.0021
0.046667	-0.00255	-0.00095	-0.0001	-0.0056	0.00059	-0.00229	-0.00589	-0.0017	-0.00637	-0.0039	-0.0018	-0.00109
0.05	-0.00303	-0.00128	-0.0005	-0.0074	0.00168	-0.00333	-0.00427	-0.00109	-0.00523	-0.0025	0.0001	-0.00242
0.053333	-0.00418	0.00036	-0.0009	-0.0066	0.0025	-0.00353	-0.0021	-0.0018	-0.00338	-0.0007	0.0004	-0.00289
0.056667	-0.00443	-0.00102	-0.0014	-0.0055	0.00026	-0.00313	-0.00063	-0.00061	-0.00242	-0.0004	-0.0003	-0.00204
0.06	-0.00446	0.00029	-0.0023	-0.0077	0.00223	-0.00282	0.00061	-0.00147	0.00084	-0.0019	-0.0001	-0.00327
0.063333	-0.00248	-0.00162	-0.0021	-0.0106	-0.00222	-0.00313	0.00436	-0.00216	0.00025	-0.0026	0.0007	-0.00235
0.066667	-0.0021	-2e-05	-0.0034	-0.01	-0.00203	-0.00358	0.00132	-0.00321	-0.00414	-0.0023	0.0001	-0.00185
0.07	-0.00201	-0.00079	-0.0033	-0.0097	-0.00129	-0.00461	-0.00065	-0.00338	-0.00741	-0.0019	0.0004	-0.00253
0.073333	-0.00395	-0.00224	-0.0033	-0.0108	0.00218	-0.00441	-0.00408	-0.00333	-0.00764	-0.0023	0.0004	-0.00389
0.076667	-0.00418	-0.00201	-0.0022	-0.0099	0.00318	-0.00454	-0.00387	-0.00368	-0.00889	-0.0036	0.0002	-0.00433
0.08	-0.00663	-0.00178	-0.0021	-0.0089	0.00089	-0.00521	-0.00725	-0.00409	-0.00899	-0.0046	-0.0014	-0.00522
0.083333	-0.00729	-0.00421	-0.0032	-0.0089	-0.00216	-0.00534	-0.00623	-0.00488	-0.00794	-0.005	-0.0009	-0.00564
0.086667	-0.0072	-0.00457	-0.0021	-0.0123	-0.00181	-0.00472	-0.00692	-0.00376	-0.00616	-0.0071	-0.0012	-0.00647
0.09	-0.00721	-0.00475	-0.0035	-0.013	-0.00363	-0.00414	-0.00216	-0.00556	-0.00555	-0.0077	0.0001	-0.00607
0.093333	-0.00722	-0.00395	-0.0031	-0.0116	-0.00822	-0.00435	-0.00085	-0.00641	-0.00712	-0.0055	-0.0029	-0.00559
0.096667	-0.00675	-0.00319	-0.0054	-0.0078	-0.00794	-0.00401	0.00258	-0.00699	-0.00795	-0.0033	-0.0023	-0.00583
0.1	-0.00606	-0.00194	-0.0046	-0.0073	-0.00779	-0.00455	0.00118	-0.00718	-0.00848	-0.0052	-0.0021	-0.00605
0.103333	-0.00858	-0.00305	-0.0075	-0.0056	-0.01198	-0.00528	0.00396	-0.00779	-0.01075	-0.005	-0.0032	-0.00608
0.106667	-0.00501	-0.00247	-0.0064	-0.0062	-0.01246	-0.00549	0.00165	-0.00771	-0.01063	-0.0058	-0.0038	-0.00688
0.11	-0.00465	-0.00661	-0.008	-0.0068	-0.01281	-0.00568	0.00078	-0.00579	-0.00898	-0.0069	-0.0003	-0.0069
0.113333	-0.0056	-0.00747	-0.0075	-0.0095	-0.01242	-0.00604	-0.00072	-0.0059	-0.00614	-0.0078	0.0002	-0.00571
0.116667	-0.00246	-0.00749	-0.0085	-0.0103	-0.01379	-0.00559	-0.00106	-0.00484	-0.00273	-0.0063	-0.0009	-0.00566
0.12	-0.00233	-0.00782	-0.0081	-0.0111	-0.01093	-0.00557	-0.00559	-0.00505	-0.00068	-0.006	-0.0007	-0.00537
0.123333	-0.00569	-0.00712	-0.0079	-0.0114	-0.00917	-0.006	-0.00379	-0.0056	-0.0005	-0.0043	-0.0004	-0.00562
0.126667	-0.00571	-0.00555	-0.0077	-0.0147	-0.00515	-0.00703	-0.00353	-0.0053	5e-05	-0.007	-0.0006	-0.00734
0.13	-0.00541	-0.00424	-0.0088	-0.0137	-0.00609	-0.00749	-0.00357	-0.0062	-0.00291	-0.0075	-0.0009	-0.00955
0.133333	-0.00814	-0.00542	-0.0083	-0.012	-0.00475	-0.00757	-0.00382	-0.00553	-0.00587	-0.0057	-0.0001	-0.00924
0.136667	-0.00672	-0.00547	-0.0072	-0.0092	-0.00633	-0.00837	-0.0026	-0.00418	-0.00626	-0.0078	-0.0004	-0.00865
0.14	-0.00626	-0.00493	-0.0092	-0.0085	-0.00708	-0.00708	-0.00855	-0.00483	-0.00798	-0.0109	0	-0.00888
0.143333	-0.007	-0.00375	-0.0089	-0.0054	-0.01003	-0.00611	-0.00793	-0.00701	-0.01055	-0.0097	-0.0027	-0.00671
0.146667	-0.00711	-0.00397	-0.0077	-0.006	-0.00902	-0.00618	-0.00685	-0.00569	-0.01111	-0.01	-0.0029	-0.00672
0.15	-0.0078	-0.00342	-0.0081	-0.0103	-0.00917	-0.00679	-0.0054	-0.00629	-0.01026	-0.0142	-0.0044	-0.00648
0.153333	-0.00938	-0.00138	-0.0102	-0.0118	-0.00871	-0.00726	-0.00477	-0.00781	-0.0093	-0.0125	-0.0026	-0.00671
0.156667	-0.00965	-0.00249	-0.0096	-0.0124	-0.00628	-0.00931	-0.0015	-0.00616	-0.00938	-0.0121	-0.0041	-0.00725
0.16	-0.01083	-0.00258	-0.0099	-0.0154	-0.00254	-0.00949	-0.00368	-0.00607	-0.00663	-0.0117	-0.0026	-0.00871
0.163333	-0.01086	-0.00419	-0.0093	-0.0166	0.00123	-0.00848	-0.00361	-0.00631	-0.00799	-0.0127	-0.002	-0.00769
0.166667	-0.00988	-0.00527	-0.0088	-0.0149	0.00212	-0.00802	-0.00416	-0.00511	-0.00835	-0.0125	-0.0017	-0.00771
0.17	-0.00967	-0.00565	-0.0087	-0.0136	0.00409	-0.00656	-0.00297	-0.00564	-0.01287	-0.0124	-0.0033	-0.00819
0.173333	-0.00931	-0.00533	-0.0105	-0.0132	0.00413	-0.00589	-0.00537	-0.00584	-0.01465	-0.011	-0.0022	-0.00705
0.176667	-0.00762	-0.00654	-0.0123	-0.0134	0.00115	-0.00645	-0.00499	-0.00471	-0.01693	-0.0112	-0.0013	-0.00572
0.18	-0.00857	-0.00592	-0.0137	-0.0154	-0.00125	-0.00631	-0.00669	-0.00492	-0.01289	-0.0111	-0.0014	-0.00649
0.183333	-0.01038	-0.0056	-0.0144	-0.017	8e-05	-0.00721	-0.00524	-0.0059	-0.01225	-0.0096	-0.0025	-0.00781
0.186667	-0.01074	-0.00644	-0.0152	-0.0184	-0.00054	-0.00876	-0.00659	-0.0044	-0.00914	-0.0105	-0.0027	-0.00793
0.19	-0.01142	-0.00691	-0.0135	-0.016	-0.00384	-0.01081	-0.00509	-0.00525	-0.00865	-0.0098	-0.0035	-0.00945
0.193333	-0.01233	-0.00738	-0.0121	-0.0161	-0.00407	-0.01063	-0.00475	-0.00702	-0.00874	-0.0097	-0.0062	-0.01101
0.196667	-0.01233	-0.00865	-0.0129	-0.0139	-0.00536	-0.01239	-0.00377	-0.00654	-0.0095	-0.0076	-0.007	-0.00889
0.2	-0.01178	-0.00949	-0.0136	-0.0124	-0.00646	-0.01166	-0.00548	-0.0074	-0.01075	-0.0089	-0.0071	-0.00799
0.203333	-0.00837	-0.01024	-0.0135	-0.0129	-0.00695	-0.01115	-0.00462	-0.00798	-0.01217	-0.0106	-0.0073	-0.00758
0.206667	-0.00924	-0.01125	-0.0147	-0.0196	-0.00446	-0.00945	-0.00704	-0.00754	-0.01075	-0.0131	-0.0098	-0.00552
0.21	-0.00962	-0.01022	-0.0149	-0.0191	-0.00389	-0.00958	-0.00813	-0.00834	-0.01195	-0.0132	-0.0095	-0.00539
0.213333	-0.00876	-0.00962	-0.0139	-0.0182	-0.00136	-0.00865	-0.00977	-0.00925	-0.0158	-0.0151	-0.0092	-0.00573
0.216667	-0.00943	-0.01115	-0.013	-0.0186	-0.00189	-0.00962	-0.0082	-0.00993	-0.01435	-0.0147	-0.0085	-0.00634
0.22	-0.01221	-0.01255	-0.0132	-0.021	-0.00219	-0.01004	-0.01051	-0.00891	-0.01507	-0.0147	-0.0077	-0.00735
0.223333	-0.01126	-0.0113	-0.0127	-0.0185	-0.0039	-0.01135	-0.0081	-0.00834	-0.01636	-0.0128	-0.0054	-0.009
0.226667	-0.0124	-0.01192	-0.0124	-0.0172	-0.00527	-0.01098	-0.00824	-0.00642	-0.01527	-0.0139	-0.0031	-0.0102
0.23	-0.01366	-0.01188	-0.0124	-0.0193	-0.00856	-0.01139	-0.00556	-0.00659	-0.01305	-0.014	-0.0042	-0.01138
0.233333	-0.0137	-0.00986	-0.0139	-0.02	-0.00768	-0.01112	-0.00734	-0.00591	-0.01603	-0.0149	-0.0026	-0.01256
0.236667	-0.01377	-0.00812	-0.0125	-0.0181	-0.00733	-0.01188	-0.00494	-0.00823	-0.01477	-0.0134	-0.0032	-0.01212
0.24	-0.01476	-0.00758	-0.014	-0.0179	-0.00589	-0.0104	-0.00559	-0.00857	-0.01315	-0.0153	-0.0042	-0.01202
0.243333	-0.01553	-0.00753	-0.0156	-0.0196	-0.00479	-0.00986	-0.00405	-0.01053	-0.01319	-0.0145	-0.0065	-0.01181
0.246667	-0.01535	-0.00733	-0.0145	-0.0195	-0.00418	-0.01124	-0.00641	-0.00959	-0.01101	-0.0165	-0.0051	-0.01275
0.25	-0.01441	-0.00702	-0.0138	-0.0197	-0.00537	-0.01164	-0.00625	-0.0089	-0.00841	-0.0151	-0.0051	-0.01283
0.253333	-0.01587	-0.00629	-0.014	-0.0213	-0.00522	-0.0107	-0.00911	-0.00912	-0.00954	-0.0147	-0.0064	-0.01374
0.256667	-0.01647	-0.00808	-0.0129	-0.0194	-0.00792	-0.01148	-0.01001	-0.01133	-0.01011	-0.0149	-0.0056	-0.01413
0.26	-0.01496	-0.00792	-0.0119	-0.019	-0.00747	-0.01255	-0.01128	-0.00965	-0.01244	-0.0171	-0.0051	-0.01495
0.263333	-0.01554	-0.00834	-0.0135	-0.0187	-0.00726	-0.01185	-0.0118	-0.01092	-0.01697	-0.0163	-0.0063	-0.01548
0.266667	-0.01471	-0.00825	-0.0142	-0.02	-0.0108	-0.01132	-0.0157	-0.01208	-0.01602	-0.0184	-0.0081	-0.01396
0.27	-0.01111	-0.00906	-0.016	-0.0181	-0.01	-0.01054	-0.01618	-0.00931	-0.01284	-0.0197	-0.0094	-0.01483
0.273333	-0.01107	-0.00881	-0.0158	-0.0194	-0.00713	-0.01177	-0.0175	-0.00912	-0.01347	-0.0179	-0.009	-0.01429
0.276667	-0.01186	-0.00816	-0.0196	-0.0192	-0.00887	-0.01218	-0.0179	-0.01118	-0.00879	-0.0171	-0.0112	-0.01306
0.28	-0.01127	-0.00831	-0.0195	-0.0204	-0.00932	-0.0117	-0.01708	-0.00998	-0.00538	-0.0167	-0.0107	-0.01289
0.283333	-0.01246	-0.00915	-0.0187	-0.0194	-0.0052	-0.01295	-0.01435	-0.00995	-0.00673	-0.0161	-0.0093	-0.01368
0.286667	-0.01424	-0.00907	-0.0185	-0.0208	-0.00699	-0.01443	-0.0142	-0.01017	-0.01108	-0.0164	-0.0064	-0.01378
0.29	-0.01536	-0.00965	-0.0195	-0.0214	-0.01202	-0.01329	-0.01336	-0.00925	-0.01129	-0.018	-0.0074	-0.01386
0.293333	-0.01241	-0.01164	-0.018	-0.0222	-0.0104	-0.01319	-0.01339	-0.00832	-0.01581	-0.0189	-0.0054	-0.01354
0.296667	-0.01188	-0.01242	-0.0187	-0.0234	-0.00911	-0.01347	-0.01502	-0.00859	-0.01909	-0.0194	-0.0055	-0.01387
0.3	-0.01355	-0.01231	-0.0198	-0.0237	-0.01118	-0.01131	-0.01663	-0.00684	-0.02109	-0.0199	-0.0066	-0.01449
0.303333	-0.01339	-0.01205	-0.021	-0.0229	-0.00889	-0.01063	-0.01332	-0.00835	-0.01873	-0.0197	-0.0079	-0.01359
0.306667	-0.01279	-0.0124	-0.0196	-0.0245	-0.00506	-0.01234	-0.01313	-0.00943	-0.02017	-0.0221	-0.0085	-0.01474
0.31	-0.01712	-0.01152	-0.0186	-0.0255	-0.0061	-0.01221	-0.01474	-0.00849	-0.02035	-0.0196	-0.0073	-0.01605
0.313333	-0.01724	-0.01091	-0.0171	-0.0228	-0.0059	-0.01218	-0.01527	-0.00852	-0.01809	-0.0196	-0.0081	-0.01603
0.316667	-0.01701	-0.0112	-0.0173	-0.0219	-0.00404	-0.01389	-0.01188	-0.00985	-0.01708	-0.0182	-0.0083	-0.01582
0.32	-0.01749	-0.0122	-0.0166	-0.0235	-0.00621	-0.01435	-0.0147	-0.01002	-0.01653	-0.0174	-0.0069	-0.0175
0.323333	-0.01872	-0.01241	-0.0185	-0.0233	-0.00608	-0.01336	-0.01352	-0.01019	-0.0145	-0.016	-0.0066	-0.01635
0.326667	-0.01545	-0.01093	-0.0207	-0.0228	-0.00501	-0.01375	-0.01469	-0.01125	-0.01417	-0.0194	-0.0086	-0.01656
0.33	-0.0145	-0.00944	-0.0222	-0.0237	-0.00603	-0.01415	-0.0131	-0.0127	-0.01691	-0.0201	-0.0073	-0.01614
0.333333	-0.01432	-0.00867	-0.0215	-0.0244	-0.00656	-0.01377	-0.01675	-0.0131	-0.01486	-0.0201	-0.0078	-0.01676
0.336667	-0.01591	-0.00846	-0.0221	-0.0249	-0.01091	-0.01486	-0.01487	-0.01369	-0.01731	-0.0212	-0.0088	-0.0155
0.34	-0.01286	-0.00694	-0.0229	-0.0234	-0.0139	-0.01359	-0.01624	-0.01398	-0.01633	-0.0201	-0.0084	-0.01732
0.343333	-0.01463	-0.00858	-0.0204	-0.0235	-0.01138	-0.01307	-0.01546	-0.01304	-0.01509	-0.0167	-0.0076	-0.01655
0.346667	-0.01501	-0.00915	-0.0214	-0.0244	-0.0118	-0.01258	-0.01853	-0.013	-0.01454	-0.0159	-0.011	-0.01767
0.35	-0.01544	-0.00981	-0.0205	-0.0251	-0.01393	-0.01424	-0.01635	-0.0154	-0.01774	-0.0169	-0.0101	-0.0173
0.353333	-0.01597	-0.0107	-0.0186	-0.0232	-0.01104	-0.0134	-0.01844	-0.01474	-0.01991	-0.0172	-0.0099	-0.01711
0.356667	-0.0173	-0.00999	-0.0181	-0.0256	-0.011	-0.01466	-0.01667	-0.01507	-0.02115	-0.0193	-0.0104	-0.01608
0.36	-0.01896	-0.01071	-0.0202	-0.025	-0.0142	-0.01645	-0.01645	-0.01592	-0.01981	-0.0208	-0.011	-0.01623
0.363333	-0.01968	-0.01306	-0.0199	-0.0249	-0.01527	-0.01727	-0.01282	-0.01566	-0.02014	-0.0211	-0.0098	-0.01451
0.366667	-0.01998	-0.01373	-0.022	-0.0233	-0.01694	-0.01635	-0.01653	-0.01322	-0.02038	-0.021	-0.0115	-0.01563
0.37	-0.01975	-0.01296	-0.0235	-0.0257	-0.01762	-0.01603	-0.01703	-0.01345	-0.01793	-0.0191	-0.0109	-0.01615
0.373333	-0.01993	-0.01641	-0.0221	-0.024	-0.01897	-0.01532	-0.02033	-0.01355	-0.01945	-0.0185	-0.0122	-0.0163
0.376667	-0.01908	-0.01484	-0.021	-0.0263	-0.02006	-0.01537	-0.01924	-0.01456	-0.02287	-0.0194	-0.0107	-0.01638
0.38	-0.02085	-0.01382	-0.0225	-0.0261	-0.01745	-0.01684	-0.02193	-0.01613	-0.02275	-0.0202	-0.0096	-0.01766
0.383333	-0.02186	-0.01426	-0.024	-0.0264	-0.01109	-0.01698	-0.02035	-0.01655	-0.02281	-0.0203	-0.0086	-0.01607
0.386667	-0.02134	-0.01505	-0.0235	-0.0263	-0.01004	-0.01647	-0.02196	-0.01623	-0.02242	-0.0223	-0.0097	-0.01673
0.39	-0.0206	-0.01267	-0.0265	-0.0277	-0.00759	-0.0164	-0.02046	-0.01502	-0.02141	-0.0217	-0.008	-0.01685
0.393333	-0.01993	-0.01385	-0.0277	-0.0272	-0.00515	-0.01649	-0.022	-0.01566	-0.02118	-0.0209	-0.0077	-0.01686
0.396667	-0.01918	-0.01393	-0.026	-0.025	-0.00589	-0.01558	-0.02066	-0.01336	-0.02015	-0.02	-0.0084	-0.01652
0.4	-0.01749	-0.01325	-0.0246	-0.0279	-0.01056	-0.01587	-0.02092	-0.01524	-0.0196	-0.0217	-0.009	-0.01767
0.403333	-0.01794	-0.01208	-0.0265	-0.0279	-0.00905	-0.01632	-0.02076	-0.01564	-0.01828	-0.0213	-0.0092	-0.01754
0.406667	-0.01907	-0.01343	-0.0238	-0.0279	-0.00883	-0.01808	-0.02093	-0.01808	-0.01792	-0.0224	-0.0114	-0.0174
0.41	-0.02042	-0.01404	-0.0229	-0.0274	-0.01085	-0.01706	-0.01916	-0.01765	-0.01491	-0.0237	-0.0132	-0.0182
0.413333	-0.01968	-0.01256	-0.0236	-0.0305	-0.0137	-0.01684	-0.01981	-0.0195	-0.01685	-0.0245	-0.0134	-0.01789
0.416667	-0.02164	-0.01317	-0.0244	-0.03	-0.01157	-0.01655	-0.01833	-0.01849	-0.01618	-0.0233	-0.0149	-0.01807
0.42	-0.0206	-0.01378	-0.026	-0.0321	-0.01101	-0.01803	-0.01485	-0.01893	-0.01871	-0.0233	-0.014	-0.01874
0.423333	-0.02193	-0.01386	-0.0266	-0.0316	-0.01058	-0.01823	-0.01612	-0.01794	-0.0195	-0.0228	-0.0139	-0.01923
0.426667	-0.01977	-0.01292	-0.0256	-0.031	-0.01221	-0.01933	-0.01693	-0.01734	-0.02149	-0.0223	-0.0118	-0.01932
0.43	-0.02224	-0.01394	-0.0261	-0.0291	-0.00904	-0.0193	-0.0178	-0.01729	-0.01745	-0.0238	-0.0123	-0.02084
0.433333	-0.02016	-0.01412	-0.0256	-0.0294	-0.01044	-0.01918	-0.02086	-0.0164	-0.01699	-0.0253	-0.0112	-0.02119
0.436667	-0.0226	-0.01435	-0.0263	-0.0268	-0.01276	-0.0178	-0.02139	-0.01798	-0.01516	-0.026	-0.0111	-0.02111
0.44	-0.02295	-0.01274	-0.0265	-0.0269	-0.01205	-0.0172	-0.02435	-0.01707	-0.01668	-0.0263	-0.0125	-0.02192
0.443333	-0.02371	-0.01312	-0.0293	-0.0282	-0.01083	-0.01642	-0.02442	-0.01752	-0.01859	-0.0276	-0.0141	-0.02146
0.446667	-0.02156	-0.01537	-0.0295	-0.0306	-0.01179	-0.01659	-0.02355	-0.01595	-0.02045	-0.0261	-0.0141	-0.02147
0.45	-0.02338	-0.01327	-0.0298	-0.0295	-0.01226	-0.01725	-0.02213	-0.01634	-0.02101	-0.0266	-0.015	-0.02286
0.453333	-0.02133	-0.01418	-0.0248	-0.0316	-0.01154	-0.01845	-0.02515	-0.01622	-0.02139	-0.0263	-0.0154	-0.02276
0.456667	-0.01837	-0.01571	-0.0268	-0.0302	-0.01439	-0.01869	-0.02214	-0.01798	-0.01837	-0.0266	-0.015	-0.022
0.46	-0.02035	-0.017	-0.0256	-0.0318	-0.01404	-0.01821	-0.02426	-0.01621	-0.01668	-0.0243	-0.0166	-0.02268
0.463333	-0.01859	-0.01449	-0.0259	-0.0316	-0.01664	-0.01843	-0.02458	-0.01876	-0.01771	-0.0247	-0.0184	-0.02283
0.466667	-0.01687	-0.01453	-0.0258	-0.033	-0.01394	-0.01754	-0.02598	-0.01919	-0.0206	-0.024	-0.0193	-0.02064
0.47	-0.01821	-0.01552	-0.0275	-0.0317	-0.01533	-0.0175	-0.02551	-0.01856	-0.02118	-0.0235	-0.0189	-0.01958
0.473333	-0.01942	-0.01439	-0.0266	-0.0327	-0.0176	-0.01739	-0.02685	-0.01678	-0.02451	-0.0231	-0.0198	-0.01912
0.476667	-0.01836	-0.01219	-0.0275	-0.0294	-0.01574	-0.01818	-0.02681	-0.01948	-0.02599	-0.0253	-0.0187	-0.01822
0.48	-0.02184	-0.01249	-0.0266	-0.0293	-0.01307	-0.01736	-0.02675	-0.01713	-0.02495	-0.0251	-0.0161	-0.0172
0.483333	-0.02214	-0.01408	-0.0289	-0.0284	-0.01476	-0.01804	-0.02502	-0.01721	-0.02255	-0.0246	-0.0141	-0.01848
0.486667	-0.02363	-0.01402	-0.0293	-0.0294	-0.01627	-0.01856	-0.02631	-0.01775	-0.02185	-0.0245	-0.0151	-0.02008
0.49	-0.02469	-0.0151	-0.0317	-0.0296	-0.0138	-0.02064	-0.02657	-0.01915	-0.02072	-0.023	-0.013	-0.02205
0.493333	-0.02367	-0.01596	-0.03	-0.0316	-0.01637	-0.02148	-0.0255	-0.01779	-0.01874	-0.0221	-0.014	-0.02374
0.496667	-0.02375	-0.01656	-0.0308	-0.0324	-0.01441	-0.02299	-0.02543	-0.01806	-0.02036	-0.025	-0.0144	-0.0248
0.5	-0.00881	0.01198	-0.006	0.0303	0.02609	0.0066	0.02015	0.00047	-0.18821	0.055	0.0436	0.07967
0.503333	0.02641	0.05175	0.0188	0.0463	0.04863	0.02582	0.04362	0.01303	-0.14402	0.0736	0.0678	0.0912
0.506667	0.0577	0.08336	0.0583	0.0733	0.07203	0.0643	0.0768	0.02494	-0.09157	0.1096	0.0905	0.11635
0.51	0.10352	0.12918	0.0997	0.107	0.09868	0.10002	0.11932	0.06502	-0.04026	0.1361	0.1181	0.14973
0.513333	0.14396	0.16168	0.1444	0.1414	0.1281	0.14102	0.15785	0.09459	0.00451	0.1705	0.1691	0.17581
0.516667	0.18292	0.20188	0.1844	0.1739	0.15859	0.178	0.19525	0.117	0.05686	0.203	0.1928	0.20247
0.52	0.22957	0.24078	0.2312	0.2125	0.18789	0.22287	0.23425	0.15054	0.10304	0.2345	0.2256	0.23498
0.523333	0.27278	0.27868	0.2751	0.2509	0.2199	0.26465	0.27315	0.18199	0.14859	0.2659	0.257	0.26574
0.526667	0.31469	0.31688	0.3186	0.292	0.24918	0.30609	0.31335	0.20897	0.19086	0.2965	0.288	0.29625
0.53	0.35415	0.35538	0.361	0.3338	0.28121	0.34752	0.35185	0.23943	0.23288	0.3262	0.3166	0.32774
0.533333	0.40224	0.39158	0.4024	0.3747	0.31032	0.39031	0.39225	0.26607	0.27467	0.3577	0.345	0.36041
0.536667	0.44049	0.43238	0.4468	0.4212	0.33656	0.4339	0.43535	0.29165	0.31312	0.3878	0.3745	0.39694
0.54	0.48165	0.47168	0.4875	0.465	0.36647	0.47594	0.47635	0.32754	0.34685	0.4167	0.4116	0.43048
0.543333	0.52205	0.50678	0.5288	0.5064	0.39848	0.52	0.51255	0.35767	0.38493	0.4478	0.4446	0.46073
0.546667	0.56315	0.54278	0.5677	0.5485	0.42648	0.56331	0.55295	0.3834	0.42063	0.4769	0.4737	0.49195
0.55	0.59945	0.58008	0.6095	0.589	0.46148	0.6075	0.59455	0.41395	0.45883	0.5063	0.5066	0.52053
0.553333	0.64325	0.61938	0.6496	0.6311	0.49258	0.65187	0.63345	0.44629	0.49833	0.5357	0.5395	0.54903
0.556667	0.67965	0.65418	0.6895	0.6694	0.51978	0.69382	0.67315	0.47171	0.53913	0.5631	0.5678	0.57637
0.56	0.72485	0.69088	0.7274	0.711	0.54718	0.73607	0.71325	0.49782	0.57693	0.593	0.596	0.60637
0.563333	0.76045	0.73098	0.7676	0.7493	0.57728	0.7772	0.75175	0.52804	0.61703	0.6219	0.6245	0.63616
0.566667	0.80925	0.76688	0.8061	0.7897	0.60478	0.81767	0.79305	0.5542	0.65403	0.6542	0.6523	0.66683
0.57	0.84685	0.80638	0.8481	0.8377	0.63698	0.86201	0.83145	0.57872	0.69483	0.6853	0.6793	0.69998
0.573333	0.88935	0.84348	0.8856	0.8811	0.66638	0.90431	0.86775	0.60646	0.73593	0.7155	0.7067	0.73071
0.576667	0.92455	0.87988	0.9232	0.921	0.69698	0.94391	0.90835	0.63402	0.77653	0.7437	0.7359	0.76158
0.58	0.97235	0.91308	0.9598	0.9631	0.72348	0.98613	0.94755	0.66178	0.81563	0.7736	0.7669	0.7921
0.583333	1.00785	0.95018	0.9976	1.0032	0.75398	1.02904	0.98985	0.6906	0.85753	0.8042	0.7992	0.82108
0.586667	1.05045	0.98848	1.0367	1.0453	0.78108	1.07404	1.02785	0.71474	0.90193	0.8318	0.8269	0.85578
0.59	1.08895	1.02488	1.0741	1.0827	0.80858	1.11464	1.06555	0.74074	0.93513	0.86	0.8521	0.88368
0.593333	1.12655	1.06088	1.1105	1.1213	0.83548	1.15544	1.10075	0.77164	0.96643	0.888	0.8772	0.91048
0.596667	1.16035	1.09668	1.1474	1.1615	0.86548	1.19604	1.13945	0.79974	1.00073	0.9143	0.9054	0.93918
0.6	1.19805	1.12918	1.183	1.2002	0.89708	1.23524	1.17795	0.82524	1.03193	0.9442	0.9297	0.96948
0.603333	1.23965	1.16748	1.2205	1.2389	0.92518	1.27804	1.21695	0.85534	1.06973	0.9725	0.9561	0.99348
0.606667	1.27915	1.20088	1.2552	1.2771	0.95598	1.31894	1.25335	0.88184	1.10583	1.0012	0.9813	1.02218
0.61	1.31375	1.23648	1.2924	1.314	0.98358	1.35874	1.29235	0.90764	1.14243	1.0292	1.0087	1.05218
0.613333	1.35185	1.27038	1.3265	1.3494	1.00838	1.39714	1.32545	0.93344	1.17963	1.0575	1.0377	1.08028
0.616667	1.39025	1.30638	1.3605	1.3858	1.03858	1.43584	1.36625	0.96014	1.21583	1.0879	1.0626	1.10738
0.62	1.43065	1.34608	1.3993	1.4271	1.07158	1.47704	1.39885	0.98444	1.25173	1.1143	1.0905	1.13968
0.623333	1.46705	1.38068	1.4351	1.4652	1.09628	1.51344	1.43675	1.00944	1.28543	1.1414	1.118	1.16788
0.626667	1.50945	1.41358	1.4668	1.5014	1.12658	1.55204	1.47085	1.03274	1.32233	1.1677	1.1443	1.19558
0.63	1.54565	1.44778	1.5019	1.5341	1.15888	1.58854	1.50745	1.05764	1.35433	1.1941	1.1691	1.22178
0.633333	1.58095	1.48218	1.5366	1.5724	1.18498	1.62734	1.54545	1.08364	1.38803	1.218	1.1968	1.24738
0.636667	1.61935	1.51458	1.5713	1.6115	1.21598	1.66704	1.58315	1.10934	1.42483	1.2471	1.2222	1.27958
0.64	1.65195	1.54628	1.6032	1.6472	1.24828	1.70574	1.61655	1.13534	1.46003	1.2722	1.2481	1.30608
0.643333	1.68395	1.57968	1.6359	1.6862	1.27648	1.74344	1.65025	1.16134	1.49093	1.2976	1.2724	1.33048
0.646667	1.71855	1.61108	1.6677	1.7261	1.30418	1.78164	1.68415	1.18374	1.52383	1.3251	1.2964	1.35588
0.65	1.75375	1.64318	1.6992	1.7594	1.33448	1.81774	1.71565	1.21044	1.55653	1.3504	1.322	1.38268
0.653333	1.78505	1.67878	1.7335	1.796	1.36488	1.85564	1.75075	1.23854	1.58693	1.3783	1.3492	1.41028
0.656667	1.82675	1.71348	1.7639	1.8293	1.38888	1.89114	1.78375	1.26514	1.61483	1.4013	1.3738	1.43648
0.66	1.85405	1.74508	1.7966	1.8606	1.41548	1.92484	1.81795	1.29144	1.64503	1.4258	1.3987	1.46428
0.663333	1.88795	1.77788	1.8284	1.8942	1.44108	1.96084	1.84895	1.31934	1.67733	1.4493	1.4235	1.48828
0.666667	1.92365	1.80988	1.8605	1.9273	1.46868	1.99464	1.88495	1.34264	1.70763	1.4772	1.4455	1.51338
0.67	1.96485	1.84628	1.8937	1.963	1.49538	2.03394	1.91825	1.36484	1.74243	1.5006	1.4692	1.53918
0.673333	1.99075	1.87508	1.9254	1.9965	1.52348	2.06854	1.95195	1.39124	1.77733	1.525	1.4916	1.56408
0.676667	2.02885	1.90318	1.9548	2.0295	1.55118	2.10394	1.98335	1.41494	1.81503	1.5487	1.5158	1.58788
0.68	2.06295	1.93528	1.9843	2.0606	1.57878	2.13704	2.01795	1.43904	1.84643	1.5708	1.5397	1.61318
0.683333	2.09005	1.96448	2.0132	2.0943	1.60658	2.17174	2.05045	1.46024	1.88003	1.5943	1.5605	1.63818
0.686667	2.12935	1.99648	2.0449	2.1305	1.63758	2.20654	2.07945	1.48684	1.91453	1.619	1.5829	1.66318
0.69	2.16175	2.02948	2.0751	2.1631	1.66578	2.23884	2.11005	1.51024	1.94273	1.6433	1.6083	1.68708
0.693333	2.19205	2.06138	2.1042	2.1968	1.69018	2.27214	2.13945	1.53034	1.96803	1.6675	1.6295	1.70838
0.696667	2.22135	2.09158	2.1325	2.2256	1.72048	2.30264	2.16685	1.55474	1.99573	1.6921	1.6552	1.73188
0.7	2.25485	2.12248	2.1604	2.2548	1.74458	2.33594	2.20035	1.57734	2.02333	1.7147	1.6776	1.75428
0.703333	2.28395	2.15178	2.1907	2.2905	1.76868	2.37034	2.23085	1.59854	2.05343	1.7379	1.6982	1.77858
0.706667	2.31695	2.17938	2.2161	2.3199	1.79948	2.40294	2.25855	1.62324	2.08183	1.76	1.7218	1.79958
0.71	2.35035	2.21008	2.2434	2.3485	1.82668	2.43414	2.28765	1.64894	2.10953	1.7825	1.7439	1.82418
0.713333	2.38395	2.23788	2.2707	2.3832	1.84838	2.46664	2.31565	1.66934	2.13613	1.803	1.7635	1.84748
0.716667	2.41485	2.26658	2.2975	2.4182	1.87868	2.49684	2.34815	1.69314	2.16623	1.828	1.7903	1.86878
0.72	2.44815	2.29718	2.3254	2.446	1.90548	2.53184	2.37715	1.71514	2.19393	1.8498	1.8105	1.89238
0.723333	2.47995	2.32398	2.3543	2.4792	1.92648	2.56124	2.40435	1.73884	2.22263	1.872	1.832	1.91568
0.726667	2.50955	2.34948	2.38	2.5085	1.95328	2.59164	2.43285	1.75974	2.24853	1.8931	1.8546	1.93808
0.73	2.53935	2.37468	2.4071	2.5388	1.97988	2.62284	2.46155	1.78164	2.27493	1.9161	1.875	1.95798
0.733333	2.56645	2.40068	2.4355	2.5651	2.00298	2.65164	2.48945	1.80224	2.30023	1.9363	1.8928	1.97868
0.736667	2.59625	2.43018	2.4632	2.5985	2.03088	2.68214	2.51515	1.82614	2.32703	1.9595	1.9121	2.00038
0.74	2.62265	2.45898	2.4874	2.6251	2.05738	2.71254	2.54305	1.84734	2.35193	1.9797	1.9324	2.01968
0.743333	2.65135	2.48808	2.5139	2.6532	2.08188	2.74164	2.57025	1.86854	2.37933	1.9991	1.9553	2.03918
0.746667	2.67955	2.51758	2.5384	2.6801	2.10158	2.76904	2.59875	1.89014	2.40393	2.0184	1.9747	2.05998
0.75	2.70755	2.54318	2.5612	2.709	2.12988	2.79734	2.62405	1.91634	2.42733	2.0408	1.995	2.08138
0.753333	2.73955	2.57138	2.5888	2.7367	2.15548	2.82884	2.65375	1.93764	2.45243	2.0614	2.0151	2.10418
0.756667	2.76655	2.59678	2.6133	2.7657	2.17868	2.85584	2.67945	1.95784	2.47513	2.082	2.0343	2.12668
0.76	2.79375	2.61998	2.637	2.7942	2.20428	2.88354	2.70325	1.98044	2.49573	2.101	2.0519	2.14648
0.763333	2.82165	2.64578	2.661	2.8224	2.23308	2.90964	2.72635	2.00174	2.52243	2.1206	2.0693	2.16748
0.766667	2.84935	2.67208	2.6853	2.8479	2.25668	2.93904	2.75415	2.01764	2.54763	2.1395	2.0897	2.18658
0.77	2.88335	2.70058	2.7113	2.8787	2.28288	2.96694	2.78195	2.03754	2.57173	2.1616	2.1076	2.20898
0.773333	2.90605	2.72478	2.7355	2.9037	2.30578	2.99444	2.80755	2.05874	2.59333	2.1812	2.1263	2.22788
0.776667	2.93625	2.75158	2.759	2.9276	2.32578	3.02064	2.83365	2.07734	2.61773	2.2004	2.1458	2.24668
0.78	2.96355	2.77528	2.7828	2.9517	2.35138	3.04874	2.85765	2.09814	2.64003	2.2193	2.1704	2.26468
0.783333	2.98975	2.80028	2.8046	2.9807	2.37238	3.07354	2.88085	2.11884	2.66083	2.2368	2.1879	2.28448
0.786667	3.01225	2.82618	2.8274	3.0055	2.39488	3.10084	2.90615	2.14034	2.68803	2.2561	2.2061	2.30288
0.79	3.04385	2.85278	2.8502	3.0327	2.41578	3.12604	2.93065	2.16104	2.71103	2.2758	2.2276	2.32188
0.793333	3.06975	2.87488	2.8724	3.06	2.43948	3.15134	2.95485	2.18114	2.73193	2.2941	2.2446	2.34078
0.796667	3.09295	2.89928	2.8932	3.0852	2.45848	3.17634	2.97935	2.19954	2.75153	2.3131	2.2595	2.36108
0.8	3.12115	2.92198	2.9156	3.1089	2.48138	3.20184	3.00195	2.22004	2.77423	2.331	2.2821	2.38008
0.803333	3.14655	2.94458	2.9398	3.136	2.51278	3.23034	3.02325	2.23894	2.80003	2.3493	2.3022	2.40098
0.806667	3.17195	2.96468	2.9609	3.1586	2.53308	3.25414	3.04705	2.25624	2.82493	2.3658	2.3182	2.41868
0.81	3.19395	2.99088	2.9843	3.183	2.55738	3.27814	3.06795	2.27424	2.84653	2.3857	2.336	2.43578
0.813333	3.21705	3.01248	3.0063	3.2062	2.58308	3.30104	3.09045	2.29324	2.86783	2.4033	2.3552	2.45238
0.816667	3.24035	3.03478	3.0283	3.2294	2.60388	3.32314	3.11215	2.31094	2.88893	2.4218	2.368	2.46948
0.82	3.26595	3.06128	3.0503	3.254	2.62308	3.34694	3.13715	2.32914	2.91373	2.4409	2.3845	2.48858
0.823333	3.28705	3.08588	3.0708	3.2788	2.64888	3.37134	3.15545	2.35144	2.93333	2.4566	2.4022	2.50488
0.826667	3.30955	3.10458	3.0891	3.3018	2.67198	3.39524	3.17755	2.36974	2.95403	2.4724	2.4175	2.52428
0.83	3.33525	3.12598	3.1087	3.3256	2.69158	3.42044	3.19915	2.39054	2.97403	2.4905	2.435	2.54048
0.833333	3.35785	3.14678	3.1287	3.3495	2.71498	3.44464	3.22055	2.40784	2.99403	2.5061	2.4523	2.55758
0.836667	3.38055	3.16908	3.1498	3.3765	2.73748	3.47064	3.24265	2.42624	3.01593	2.5243	2.4701	2.57488
0.84	3.40415	3.19088	3.1693	3.3984	2.75878	3.49364	3.26515	2.44444	3.03893	2.5421	2.4862	2.58998
0.843333	3.42715	3.21368	3.1894	3.4217	2.77778	3.51594	3.28465	2.46214	3.05893	2.5599	2.5006	2.60148
0.846667	3.44905	3.23628	3.2089	3.445	2.79758	3.53694	3.30495	2.47954	3.08093	2.5751	2.5175	2.61588
0.85	3.47145	3.25878	3.2271	3.4636	2.81608	3.55934	3.32515	2.49934	3.10583	2.5913	2.5367	2.63138
0.853333	3.49585	3.28068	3.2482	3.4873	2.83858	3.58354	3.34975	2.51684	3.12043	2.609	2.5537	2.64728
0.856667	3.51775	3.29958	3.2682	3.5078	2.86098	3.60494	3.36905	2.53294	3.13783	2.6242	2.5709	2.66368
0.86	3.54035	3.31798	3.2866	3.5259	2.88018	3.62604	3.38975	2.55094	3.15823	2.6379	2.5873	2.68048
0.863333	3.56095	3.33768	3.3051	3.5483	2.89988	3.64774	3.41065	2.56944	3.17873	2.6536	2.6036	2.69918
0.866667	3.58405	3.35698	3.3252	3.5693	2.92078	3.66894	3.42995	2.58564	3.19103	2.6697	2.6182	2.71468
0.87	3.60965	3.37858	3.3456	3.5881	2.94268	3.68944	3.44895	2.60434	3.21403	2.6867	2.6328	2.73238
0.873333	3.63025	3.39648	3.3632	3.6109	2.96258	3.71084	3.46835	2.62074	3.23093	2.7029	2.6481	2.74928
0.876667	3.65225	3.41638	3.3817	3.6352	2.98418	3.73124	3.48655	2.63664	3.24823	2.7197	2.6647	2.76858
0.88	3.67325	3.43738	3.4004	3.6533	3.01088	3.75204	3.50415	2.65154	3.26293	2.7346	2.6779	2.78188
0.883333	3.69075	3.45768	3.4197	3.6749	3.02698	3.77224	3.52405	2.66954	3.28223	2.7503	2.6923	2.79598
0.886667	3.71185	3.47808	3.4382	3.697	3.04698	3.79394	3.54295	2.68484	3.30123	2.7657	2.7087	2.81518
0.89	3.73055	3.50018	3.4578	3.7144	3.06808	3.81384	3.56225	2.70314	3.31753	2.7813	2.7248	2.83048
0.893333	3.74985	3.51998	3.474	3.7326	3.08438	3.83384	3.58075	2.71964	3.33643	2.7947	2.7404	2.84438
0.896667	3.76875	3.53578	3.4909	3.75	3.09798	3.85394	3.59855	2.73644	3.35513	2.8085	2.757	2.86128
0.9	3.79145	3.55348	3.5064	3.7692	3.12008	3.87194	3.61785	2.74974	3.36953	2.8242	2.7708	2.87568
0.903333	3.81175	3.57478	3.5247	3.7911	3.14078	3.89294	3.63915	2.76754	3.38133	2.8411	2.7845	2.88748
0.906667	3.83525	3.59258	3.5411	3.8104	3.15628	3.91084	3.65555	2.78314	3.39443	2.8553	2.7986	2.90118
0.91	3.85495	3.61128	3.5591	3.8287	3.17558	3.93034	3.67265	2.79824	3.40953	2.8691	2.812	2.91548
0.913333	3.87355	3.63058	3.5771	3.848	3.19338	3.94804	3.69275	2.81654	3.42243	2.8836	2.8246	2.92638
0.916667	3.89155	3.64828	3.5939	3.8651	3.21188	3.96734	3.70625	2.83284	3.44043	2.8968	2.8408	2.94378
0.92	3.91365	3.66438	3.6124	3.8819	3.23248	3.98794	3.72285	2.84784	3.46213	2.9119	2.8549	2.95908
0.923333	3.92865	3.68218	3.6285	3.8999	3.25088	4.00754	3.73785	2.86364	3.48383	2.9251	2.8663	2.97458
0.926667	3.94425	3.69818	3.6445	3.9178	3.26838	4.02504	3.75495	2.87884	3.49943	2.9398	2.8807	2.98688
0.93	3.96365	3.71378	3.6593	3.9348	3.28608	4.04254	3.76745	2.89134	3.51853	2.9537	2.8991	3.00218
0.933333	3.98105	3.73028	3.6746	3.954	3.30418	4.06094	3.78545	2.90854	3.53603	2.9664	2.9124	3.01258
0.936667	3.99755	3.75098	3.6917	3.9743	3.32238	4.07884	3.80495	2.92304	3.55503	2.9805	2.9274	3.02668
0.94	4.01795	3.76728	3.7071	3.9907	3.33998	4.09644	3.82385	2.93644	3.56983	2.9951	2.9399	3.03778
0.943333	4.03875	3.78488	3.7228	4.0066	3.36068	4.11404	3.83825	2.95364	3.58553	3.0084	2.954	3.05208
0.946667	4.05695	3.80348	3.7396	4.0251	3.37848	4.13394	3.85675	2.96894	3.60023	3.022	2.9613	3.06618
0.95	4.07415	3.82118	3.7558	4.0408	3.39578	4.15154	3.87215	2.98204	3.61483	3.0352	2.972	3.08128
0.953333	4.09515	3.83858	3.7729	4.0602	3.41408	4.17134	3.88825	2.99964	3.63013	3.046	2.9861	3.09518
0.956667	4.11415	3.85588	3.7888	4.0746	3.42958	4.18884	3.90415	3.01384	3.64613	3.0578	3.0007	3.10838
0.96	4.13095	3.87128	3.8034	4.0918	3.44468	4.20654	3.92015	3.02574	3.66333	3.0724	3.0142	3.11788
0.963333	4.14825	3.88528	3.8178	4.1072	3.46348	4.22414	3.93515	3.03944	3.67843	3.0832	3.0329	3.12768
0.966667	4.16505	3.89998	3.8321	4.1224	3.47908	4.24014	3.95115	3.05554	3.69233	3.0965	3.0468	3.13828
0.97	4.18365	3.91628	3.8478	4.1365	3.49678	4.25744	3.96895	3.06624	3.70853	3.1134	3.0561	3.15098
0.973333	4.19865	3.93028	3.8623	4.1557	3.51328	4.27324	3.98395	3.08174	3.72073	3.1263	3.0716	3.16588
0.976667	4.21315	3.94708	3.8772	4.1699	3.53048	4.29024	4.00135	3.09534	3.73393	3.1371	3.0822	3.18098
0.98	4.22885	3.96308	3.8922	4.1845	3.54518	4.30414	4.01705	3.10904	3.74733	3.1506	3.0912	3.19378
0.983333	4.24465	3.97768	3.9082	4.2004	3.56158	4.32134	4.02935	3.12114	3.76123	3.1615	3.1018	3.20738
0.986667	4.26205	3.99358	3.923	4.2177	3.57928	4.33814	4.04495	3.13654	3.77393	3.1743	3.1172	3.22268
0.99	4.27715	4.00938	3.9381	4.2318	3.59688	4.35284	4.06045	3.15124	3.78843	3.1869	3.1286	3.23288
0.993333	4.29255	4.02288	3.9521	4.2463	3.61178	4.36674	4.07715	3.16404	3.80353	3.1994	3.139	3.24398
0.996667	4.30665	4.03788	3.9655	4.2627	3.62618	4.38214	4.09105	3.17664	3.81633	3.2118	3.1526	3.25748
1	4.32185	4.05248	3.9793	4.2764	3.64178	4.39644	4.10905	3.19144	3.82863	3.227	3.1674	3.26828
1.00333	4.34085	4.06978	3.994	4.2945	3.65848	4.41394	4.12285	3.20644	3.84253	3.2383	3.1787	3.28068
1.00667	4.35385	4.08358	4.0073	4.3047	3.67098	4.42984	4.13735	3.21914	3.85393	3.2503	3.1902	3.29218
1.01	4.36915	4.09808	4.0223	4.3206	3.68618	4.44604	4.14815	3.23284	3.86573	3.263	3.2041	3.30648
1.01333	4.38565	4.11338	4.0366	4.3346	3.70378	4.46024	4.16105	3.24654	3.88043	3.2749	3.2145	3.31848
1.01667	4.39965	4.12878	4.0497	4.3495	3.71848	4.47464	4.17325	3.25704	3.89513	3.284	3.2257	3.33108
1.02	4.41575	4.14078	4.0653	4.3647	3.73278	4.49124	4.18845	3.26764	3.90783	3.2983	3.2367	3.34318
1.02333	4.43185	4.15358	4.0781	4.3824	3.75088	4.50684	4.20105	3.28354	3.92143	3.309	3.2483	3.35438
1.02667	4.44275	4.16868	4.0922	4.3955	3.76538	4.52064	4.21495	3.29824	3.93363	3.3187	3.2604	3.36378
1.03	4.45675	4.17978	4.1045	4.4079	3.77878	4.53474	4.22705	3.31184	3.94533	3.3314	3.2736	3.37368
1.03333	4.47255	4.19268	4.1171	4.4211	3.79218	4.55044	4.23955	3.32514	3.95913	3.3434	3.2831	3.38458
1.03667	4.48435	4.20848	4.131	4.434	3.80908	4.56434	4.25205	3.33954	3.97463	3.3544	3.2928	3.39598
1.04	4.49975	4.22108	4.1446	4.4466	3.82058	4.57914	4.26365	3.35014	3.99273	3.3637	3.304	3.40518
1.04333	4.51975	4.23358	4.157	4.4604	3.83448	4.59334	4.27405	3.36304	4.00343	3.3748	3.3154	3.41698
1.04667	4.53475	4.24798	4.1689	4.4728	3.84718	4.60874	4.28875	3.37664	4.02033	3.384	3.3221	3.42948
1.05	4.55155	4.26138	4.182	4.4867	3.86368	4.62294	4.30235	3.38944	4.02853	3.3957	3.3336	3.44018
1.05333	4.56905	4.27728	4.1965	4.5004	3.87828	4.63854	4.31605	3.40054	4.04563	3.4071	3.3469	3.45298
1.05667	4.58515	4.29268	4.2081	4.5128	3.89308	4.65114	4.32805	3.41414	4.05373	3.4191	3.3578	3.46608
1.06	4.59905	4.30328	4.2204	4.525	3.90778	4.66594	4.34395	3.42324	4.06663	3.4294	3.3647	3.47498
1.06333	4.61445	4.31618	4.2341	4.5392	3.92278	4.67804	4.35705	3.43484	4.07313	3.4412	3.377	3.48138
1.06667	4.62505	4.32858	4.2465	4.5509	3.93638	4.69174	4.36925	3.44914	4.08613	3.449	3.3868	3.48808
1.07	4.64335	4.34128	4.2594	4.5659	3.95088	4.70644	4.38005	3.46094	4.09783	3.4615	3.394	3.49798
1.07333	4.65405	4.35578	4.2733	4.5794	3.96388	4.72094	4.39325	3.47144	4.10983	3.4721	3.4042	3.50688
1.07667	4.66645	4.36998	4.2846	4.5903	3.97568	4.73204	4.40585	3.48654	4.12333	3.484	3.4205	3.51608
1.08	4.67825	4.38348	4.2969	4.6026	3.98898	4.74584	4.41725	3.49754	4.13523	3.4939	3.4332	3.53078
1.08333	4.69225	4.39588	4.3079	4.6157	4.00128	4.75894	4.42955	3.50754	4.14713	3.5057	3.4451	3.54398
1.08667	4.70125	4.41068	4.3215	4.6287	4.01408	4.77284	4.44355	3.51944	4.16013	3.5165	3.4581	3.55398
1.09	4.71515	4.42258	4.3337	4.6408	4.02638	4.78414	4.45425	3.53044	4.17183	3.5256	3.4675	3.56448
1.09333	4.72855	4.43338	4.3472	4.6548	4.03988	4.79794	4.46535	3.54104	4.18293	3.5361	3.4732	3.57448
1.09667	4.74365	4.44718	4.3585	4.666	4.05068	4.81014	4.47615	3.55234	4.19443	3.5456	3.482	3.58268
1.1	4.75535	4.46098	4.3707	4.6779	4.06288	4.82134	4.48535	3.56134	4.20553	3.5549	3.4935	3.59118
1.10333	4.76895	4.47198	4.3832	4.6899	4.07788	4.83494	4.49725	3.57404	4.21863	3.5646	3.5012	3.60448
1.10667	4.78265	4.48158	4.3924	4.7025	4.09268	4.84584	4.50935	3.58434	4.22923	3.5761	3.5106	3.61258
1.11	4.79535	4.49428	4.4032	4.7131	4.10658	4.85834	4.52005	3.59604	4.24073	3.5841	3.5241	3.62418
1.11333	4.80755	4.50638	4.414	4.7245	4.12118	4.87204	4.53065	3.60604	4.25263	3.5943	3.5356	3.63458
1.11667	4.82205	4.51848	4.4254	4.7347	4.13348	4.88284	4.54345	3.61754	4.26423	3.6042	3.5425	3.64368
1.12	4.83405	4.53028	4.4355	4.749	4.14598	4.89434	4.55715	3.62724	4.27283	3.6155	3.5552	3.65048
1.12333	4.84655	4.54418	4.4483	4.7616	4.15798	4.90674	4.56885	3.64014	4.28273	3.6254	3.5653	3.66018
1.12667	4.85535	4.55658	4.4593	4.7718	4.16658	4.91814	4.57875	3.65024	4.29183	3.6353	3.5748	3.66928
1.13	4.86115	4.56628	4.4712	4.7839	4.17768	4.92874	4.59035	3.66154	4.30203	3.6449	3.5848	3.67748
1.13333	4.87375	4.57608	4.4824	4.7943	4.19208	4.94024	4.60095	3.67534	4.31323	3.6553	3.5971	3.68938
1.13667	4.89035	4.59038	4.4946	4.8047	4.20548	4.95214	4.61185	3.68464	4.32453	3.6634	3.6081	3.70128
1.14	4.90225	4.60108	4.5042	4.8148	4.21668	4.96574	4.62165	3.69374	4.33433	3.6736	3.6174	3.71138
1.14333	4.91955	4.61408	4.5143	4.8289	4.22918	4.97564	4.63235	3.70564	4.34453	3.6827	3.626	3.71878
1.14667	4.93745	4.62408	4.5245	4.8364	4.24078	4.98664	4.64295	3.71674	4.35543	3.6923	3.6318	3.72748
1.15	4.94805	4.63638	4.5365	4.8508	4.24828	4.99814	4.65565	3.72624	4.36523	3.7007	3.6364	3.73498
1.15333	4.95705	4.64608	4.5487	4.8601	4.26338	5.00904	4.66495	3.73684	4.37593	3.7108	3.6455	3.74348
1.15667	4.96555	4.65778	4.5597	4.8715	4.27448	5.01884	4.67695	3.74784	4.38743	3.7175	3.6534	3.75218
1.16	4.97185	4.66768	4.5709	4.8818	4.28608	5.03074	4.68815	3.75794	4.39743	3.728	3.6606	3.76188
1.16333	4.98395	4.67968	4.5831	4.8939	4.30068	5.04134	4.69955	3.76874	4.40673	3.7372	3.6712	3.77228
1.16667	4.99425	4.69058	4.5918	4.9033	4.31728	5.05194	4.70785	3.77844	4.41403	3.7453	3.6803	3.78168
1.17	5.00885	4.70338	4.602	4.9143	4.32358	5.06444	4.71835	3.78854	4.42543	3.7559	3.689	3.79028
1.17333	5.02215	4.71498	4.6124	4.9268	4.33788	5.07444	4.72615	3.79784	4.43273	3.7644	3.696	3.80008
1.17667	5.03725	4.72608	4.6229	4.9346	4.35198	5.08364	4.73645	3.80764	4.44333	3.7724	3.7042	3.80798
1.18	5.04505	4.73608	4.631	4.9457	4.36058	5.09354	4.74585	3.81724	4.45163	3.7809	3.712	3.81318
1.18333	5.05615	4.74618	4.6409	4.9543	4.36778	5.10544	4.75495	3.82414	4.46263	3.7886	3.7217	3.81988
1.18667	5.06635	4.75448	4.6521	4.9665	4.38318	5.11684	4.76785	3.83354	4.46893	3.7991	3.7296	3.83098
1.19	5.07605	4.76628	4.6626	4.9749	4.39258	5.12714	4.77685	3.84454	4.48073	3.8081	3.7385	3.83888
1.19333	5.08615	4.77648	4.6714	4.9864	4.40028	5.13954	4.78575	3.85344	4.48963	3.8161	3.7478	3.85088
1.19667	5.10035	4.78608	4.6819	4.9961	4.40978	5.14974	4.79185	3.86274	4.50093	3.8227	3.7575	3.86168
1.2	5.10805	4.79528	4.6929	5.008	4.42378	5.15754	4.80275	3.87224	4.50943	3.8359	3.7644	3.86928
1.20333	5.12215	4.80678	4.7027	5.0173	4.43198	5.16944	4.81255	3.88274	4.52083	3.8406	3.7739	3.87968
1.20667	5.13255	4.81588	4.7123	5.0284	4.44118	5.17954	4.82355	3.89034	4.52683	3.8491	3.785	3.88868
1.21	5.14425	4.82638	4.723	5.0404	4.45748	5.18864	4.83065	3.89994	4.53623	3.8579	3.7954	3.89488
1.21333	5.14775	4.83848	4.733	5.0519	4.46648	5.19904	4.84115	3.91044	4.54403	3.8671	3.8032	3.90328
1.21667	5.15705	4.84908	4.7421	5.0601	4.47518	5.21144	4.84975	3.92194	4.55263	3.8713	3.8156	3.91328
1.22	5.16775	4.85948	4.7523	5.069	4.49128	5.22094	4.86095	3.92994	4.56043	3.8818	3.8219	3.91758
1.22333	5.17905	4.86978	4.7614	5.0797	4.50288	5.23214	4.86915	3.93884	4.56983	3.8879	3.8256	3.92258
1.22667	5.18505	4.87628	4.7708	5.0875	4.50748	5.24144	4.87895	3.94994	4.57593	3.8964	3.8347	3.92908
1.23	5.19785	4.88558	4.7802	5.0972	4.52208	5.25134	4.88825	3.95854	4.58283	3.9055	3.8434	3.93308
1.23333	5.21475	4.89528	4.7902	5.1075	4.52778	5.25894	4.89615	3.96684	4.59183	3.9132	3.8488	3.93808
1.23667	5.21685	4.90438	4.8004	5.1184	4.53478	5.26754	4.90405	3.97654	4.60083	3.9222	3.8553	3.94798
1.24	5.22665	4.91498	4.8098	5.1253	4.54288	5.27514	4.91295	3.98754	4.60983	3.9318	3.8636	3.95908
1.24333	5.24155	4.92738	4.8193	5.1371	4.55868	5.28354	4.92105	3.99484	4.61813	3.937	3.8703	3.96548
1.24667	5.24785	4.93538	4.8299	5.1446	4.56378	5.29184	4.92775	4.00494	4.62863	3.946	3.8748	3.97858
1.25	5.24795	4.94598	4.8384	5.1549	4.57738	5.30174	4.93795	4.01454	4.63833	3.9554	3.8816	3.98688
1.25333	5.26335	4.95378	4.8498	5.1636	4.58928	5.31144	4.94735	4.02244	4.65073	3.962	3.8914	3.99048
1.25667	5.27105	4.96248	4.8593	5.173	4.59888	5.32184	4.95685	4.03004	4.65713	3.9705	3.898	3.99788
1.26	5.27575	4.97068	4.8682	5.1777	4.60318	5.33124	4.96425	4.03774	4.66553	3.9781	3.9061	4.00518
1.26333	5.28725	4.97978	4.8758	5.1871	4.61548	5.33984	4.97265	4.04734	4.67313	3.9833	3.9181	4.00918
1.26667	5.30095	4.98798	4.8855	5.1948	4.62528	5.34774	4.97885	4.05394	4.67913	3.9906	3.9252	4.01718
1.27	5.31075	4.99728	4.8943	5.2015	4.63588	5.35654	4.98925	4.06174	4.68173	4.0012	3.9326	4.02538
1.27333	5.31695	5.00888	4.9032	5.2137	4.64728	5.36514	4.99765	4.07124	4.69063	4.0075	3.9433	4.03168
1.27667	5.33315	5.01798	4.9122	5.2244	4.65628	5.37354	5.00665	4.08104	4.69763	4.0151	3.9486	4.04328
1.28	5.34345	5.02738	4.9213	5.2337	4.66558	5.38284	5.01755	4.08824	4.70293	4.0223	3.9566	4.05178
1.28333	5.35155	5.03598	4.9305	5.2404	4.67328	5.39174	5.02575	4.09884	4.71203	4.0292	3.9639	4.05868
1.28667	5.36195	5.04538	4.94	5.2503	4.68138	5.40234	5.03385	4.10794	4.72063	4.0366	3.971	4.06608
1.29	5.37575	5.05558	4.9496	5.2562	4.68738	5.41114	5.04205	4.11324	4.72923	4.0438	3.9777	4.07428
1.29333	5.37685	5.06498	4.9584	5.2657	4.69508	5.41964	5.05225	4.12114	4.73623	4.0536	3.9839	4.07528
1.29667	5.38855	5.07458	4.9671	5.2722	4.70418	5.42804	5.05975	4.12774	4.74503	4.0598	3.9893	4.07878
1.3	5.39905	5.08198	4.9737	5.2812	4.71278	5.43594	5.06795	4.13684	4.74983	4.0676	3.9962	4.08658
1.30333	5.40725	5.08898	4.9833	5.289	4.72788	5.44354	5.07155	4.14424	4.76223	4.0733	4.0043	4.09328
1.30667	5.40805	5.09708	4.9908	5.3007	4.73518	5.45004	5.07875	4.15414	4.77383	4.0801	4.0096	4.09878
1.31	5.41825	5.10408	4.9989	5.3075	4.74128	5.45694	5.08655	4.16104	4.78243	4.0832	4.0148	4.10648
1.31333	5.42275	5.11038	5.0067	5.3158	4.74878	5.46464	5.09315	4.16904	4.79483	4.0892	4.0234	4.11448
1.31667	5.43005	5.12128	5.0164	5.3258	4.75848	5.47414	5.10015	4.17564	4.80233	4.0951	4.0302	4.12028
1.32	5.43625	5.13098	5.0237	5.3344	4.76408	5.48294	5.11025	4.18584	4.81043	4.1052	4.0364	4.12678
1.32333	5.44735	5.13928	5.0322	5.3422	4.77638	5.49244	5.11665	4.19474	4.81673	4.111	4.0466	4.13608
1.32667	5.45835	5.14828	5.0402	5.3466	4.78758	5.50064	5.12215	4.20344	4.82553	4.1192	4.0552	4.14088
1.33	5.47135	5.15738	5.0486	5.3568	4.79898	5.50864	5.12855	4.21084	4.82763	4.1266	4.0606	4.14598
1.33333	5.47335	5.16328	5.0577	5.3623	4.80788	5.51514	5.13795	4.21754	4.83603	4.1351	4.0684	4.15098
1.33667	5.48865	5.17178	5.0663	5.3689	4.81148	5.52214	5.14535	4.22504	4.84313	4.1406	4.0748	4.15708
1.34	5.50175	5.18088	5.0748	5.378	4.82268	5.52774	5.15425	4.23354	4.84923	4.1488	4.0796	4.16188
1.34333	5.51035	5.18868	5.0839	5.3857	4.83738	5.53634	5.16015	4.23994	4.85703	4.1552	4.088	4.17158
1.34667	5.51365	5.19828	5.0929	5.3928	4.84008	5.54394	5.16895	4.24864	4.86393	4.1619	4.0977	4.18138
1.35	5.53095	5.20648	5.0998	5.4028	4.84698	5.55174	5.17555	4.25724	4.87003	4.1652	4.1051	4.18928
1.35333	5.53805	5.21518	5.1096	5.4096	4.86038	5.55894	5.18425	4.26314	4.87233	4.172	4.112	4.19708
1.35667	5.54415	5.22378	5.1169	5.4155	4.86378	5.56844	5.19015	4.26834	4.88013	4.1781	4.1183	4.20658
1.36	5.54985	5.23098	5.1231	5.4212	4.86768	5.57574	5.20025	4.27594	4.88363	4.187	4.1252	4.21358
1.36333	5.55725	5.23558	5.1311	5.4284	4.87818	5.58244	5.20615	4.28114	4.89253	4.1931	4.1283	4.22028
1.36667	5.56235	5.24388	5.1384	5.4314	4.88558	5.59034	5.21305	4.28924	4.90133	4.2004	4.1317	4.22568
1.37	5.56755	5.25068	5.1453	5.4384	4.89288	5.59774	5.21785	4.29634	4.91063	4.2064	4.1364	4.23108
1.37333	5.57185	5.26038	5.1556	5.4454	4.90308	5.60554	5.22445	4.30404	4.91503	4.2135	4.1428	4.23738
1.37667	5.57415	5.27118	5.1643	5.4557	4.91158	5.61354	5.22885	4.31134	4.92423	4.2172	4.1498	4.24268
1.38	5.58735	5.28008	5.1707	5.459	4.91938	5.62054	5.23715	4.32104	4.93103	4.2243	4.1584	4.24638
1.38333	5.59975	5.28708	5.1773	5.4692	4.92758	5.62794	5.24325	4.32474	4.93703	4.2307	4.1647	4.25278
1.38667	5.60775	5.29428	5.1847	5.4763	4.93468	5.63754	5.25495	4.33384	4.94253	4.2382	4.1749	4.25848
1.39	5.61115	5.29928	5.1922	5.4844	4.94268	5.64534	5.26075	4.33934	4.95383	4.2432	4.1792	4.25858
1.39333	5.62055	5.30528	5.1992	5.4917	4.94798	5.65114	5.26665	4.34694	4.95983	4.2486	4.1869	4.26698
1.39667	5.62275	5.31258	5.2076	5.4985	4.95318	5.65894	5.27195	4.35214	4.96523	4.2536	4.1916	4.27408
1.4	5.62585	5.31968	5.2155	5.5024	4.96138	5.66534	5.27855	4.36204	4.97023	4.2582	4.1999	4.27798
1.40333	5.63765	5.32828	5.224	5.51	4.97358	5.67074	5.28475	4.36764	4.97883	4.266	4.2053	4.28588
1.40667	5.64965	5.33748	5.232	5.5163	4.97688	5.67874	5.29155	4.37334	4.98363	4.2704	4.2154	4.29868
1.41	5.65645	5.34278	5.2403	5.5233	4.98278	5.68484	5.29975	4.38004	4.98953	4.2784	4.2209	4.30218
1.41333	5.66515	5.35158	5.2462	5.5322	4.99378	5.69054	5.30435	4.38674	4.99623	4.2844	4.2268	4.30798
1.41667	5.67145	5.35898	5.2554	5.5394	4.99948	5.69734	5.30975	4.39344	5.00423	4.2897	4.233	4.31808
1.42	5.67775	5.36428	5.2622	5.5438	5.00428	5.70254	5.31755	4.40024	5.01083	4.2985	4.2393	4.32348
1.42333	5.69055	5.37338	5.2696	5.5525	5.01368	5.70974	5.32305	4.40924	5.01683	4.3034	4.2463	4.32618
1.42667	5.70185	5.38048	5.2754	5.5576	5.02338	5.71704	5.33165	4.41544	5.02253	4.3087	4.252	4.32998
1.43	5.70905	5.38698	5.2837	5.563	5.02818	5.72494	5.33795	4.42364	5.02763	4.3153	4.2558	4.33548
1.43333	5.71655	5.39268	5.2892	5.5681	5.03548	5.73124	5.34405	4.42934	5.03373	4.323	4.261	4.33878
1.43667	5.72235	5.40048	5.2974	5.5737	5.04138	5.73864	5.34755	4.43664	5.03753	4.3272	4.2628	4.34258
1.44	5.72625	5.40628	5.3054	5.5801	5.05268	5.74424	5.35555	4.44394	5.04523	4.3355	4.2652	4.35038
1.44333	5.72575	5.41298	5.3146	5.5861	5.05988	5.74974	5.35925	4.45024	5.05163	4.3414	4.2701	4.35978
1.44667	5.73065	5.41878	5.321	5.5907	5.07148	5.75464	5.36725	4.45604	5.05513	4.3452	4.276	4.36418
1.45	5.74205	5.42938	5.3291	5.5961	5.08008	5.76004	5.37195	4.46304	5.06013	4.3515	4.2847	4.36998
1.45333	5.75045	5.43508	5.3364	5.6058	5.08458	5.76684	5.37805	4.46934	5.06833	4.3551	4.2907	4.37708
1.45667	5.75555	5.44238	5.3412	5.6124	5.09568	5.77504	5.38435	4.47674	5.07373	4.3623	4.2964	4.38338
1.46	5.76995	5.44998	5.3469	5.6192	5.10298	5.78074	5.39015	4.48394	5.07673	4.3677	4.3038	4.38448
1.46333	5.77775	5.45738	5.3542	5.624	5.10508	5.78724	5.39715	4.48904	5.08283	4.3743	4.3115	4.38678
1.46667	5.78065	5.46188	5.3593	5.6319	5.10918	5.79424	5.40415	4.49394	5.08633	4.3787	4.3163	4.38968
1.47	5.78595	5.46938	5.3663	5.6336	5.11888	5.79884	5.40995	4.49854	5.09283	4.3851	4.3236	4.39288
1.47333	5.79795	5.47438	5.3739	5.6384	5.11978	5.80514	5.41755	4.50284	5.09553	4.3881	4.3295	4.39688
1.47667	5.80305	5.48068	5.3805	5.648	5.12608	5.81224	5.42155	4.50874	5.10183	4.3948	4.3329	4.40328
1.48	5.81095	5.48658	5.3864	5.6552	5.13348	5.81844	5.42645	4.51614	5.10853	4.4005	4.3365	4.41078
1.48333	5.81615	5.49088	5.395	5.6641	5.13978	5.82354	5.43095	4.52194	5.11573	4.4063	4.342	4.41518
1.48667	5.82615	5.49778	5.4016	5.6723	5.14618	5.82974	5.44025	4.52794	5.11993	4.4131	4.3453	4.42058
1.49	5.83005	5.50608	5.4086	5.6818	5.15458	5.83474	5.44255	4.53604	5.12673	4.4194	4.3546	4.42778
1.49333	5.83135	5.51298	5.4149	5.6836	5.16198	5.83934	5.45015	4.54094	5.13173	4.4223	4.3587	4.43398
1.49667	5.83605	5.51798	5.4222	5.6919	5.16688	5.84564	5.45355	4.54724	5.13923	4.4268	4.3638	4.43998
1.5	5.84505	5.52568	5.4277	5.6947	5.17608	5.85144	5.46105	4.55554	5.14553	4.4312	4.3702	4.44828
1.50333	5.85135	5.53178	5.4338	5.7005	5.17968	5.85714	5.46475	4.56054	5.15013	4.4349	4.374	4.45088
1.50667	5.85345	5.53858	5.4426	5.7023	5.18478	5.86284	5.47165	4.56524	5.15463	4.44	4.3763	4.45298
1.51	5.86735	5.54448	5.4496	5.7096	5.18758	5.87004	5.47625	4.57184	5.16303	4.4466	4.3852	4.45578
1.51333	5.87415	5.55078	5.4548	5.7157	5.19628	5.87424	5.48345	4.57714	5.16873	4.4516	4.3941	4.46228
1.51667	5.87525	5.55638	5.4618	5.722	5.20088	5.88034	5.48735	4.58094	5.17383	4.4551	4.3973	4.46578
1.52	5.87665	5.56168	5.4675	5.7283	5.20968	5.88664	5.49265	4.58924	5.17823	4.4595	4.4052	4.47228
1.52333	5.88785	5.56788	5.4731	5.7366	5.21608	5.89374	5.49805	4.59304	5.18033	4.4663	4.413	4.48188
1.52667	5.88665	5.57208	5.4793	5.7422	5.22168	5.89894	5.50435	4.59794	5.17893	4.471	4.4169	4.48898
1.53	5.89255	5.57978	5.4863	5.7468	5.22278	5.90504	5.50705	4.60564	5.17983	4.4764	4.4221	4.49478
1.53333	5.90065	5.58648	5.4926	5.7512	5.22818	5.91064	5.51265	4.61064	5.18173	4.482	4.4275	4.50098
1.53667	5.90825	5.59238	5.4997	5.7545	5.23768	5.91694	5.51925	4.61574	5.18973	4.4884	4.4311	4.50888
1.54	5.91295	5.60018	5.507	5.7624	5.24178	5.92314	5.52465	4.62194	5.19993	4.4919	4.4363	4.51148
1.54333	5.91885	5.60798	5.5121	5.7633	5.24638	5.92804	5.52725	4.62974	5.21303	4.4961	4.4407	4.51428
1.54667	5.92185	5.61328	5.5183	5.7681	5.25718	5.93364	5.53435	4.63334	5.22033	4.5016	4.4465	4.51648
1.55	5.92805	5.61868	5.5236	5.7749	5.26118	5.93724	5.53895	4.63964	5.22893	4.5065	4.4534	4.52048
1.55333	5.93285	5.62448	5.5297	5.7804	5.26328	5.94184	5.54235	4.64314	5.23063	4.5106	4.4618	4.52308
1.55667	5.94175	5.62968	5.5343	5.7858	5.27078	5.94644	5.54575	4.64724	5.23833	4.5184	4.4627	4.52868
1.56	5.95195	5.63418	5.5415	5.7923	5.27858	5.95084	5.55195	4.65224	5.24093	4.5227	4.4665	4.53518
1.56333	5.95765	5.63998	5.5474	5.7983	5.28478	5.95454	5.55745	4.65924	5.24703	4.5285	4.471	4.53648
1.56667	5.96225	5.64458	5.5528	5.8009	5.29408	5.96084	5.56295	4.66474	5.25153	4.536	4.4733	4.53928
1.57	5.96705	5.65038	5.5601	5.8064	5.29878	5.96674	5.56855	4.66964	5.25873	4.5404	4.4786	4.54138
1.57333	5.97595	5.65588	5.567	5.8098	5.30378	5.97194	5.57585	4.67734	5.26363	4.5442	4.4893	4.54728
1.57667	5.98115	5.66178	5.5718	5.8166	5.31058	5.97694	5.57965	4.68194	5.26693	4.5481	4.4956	4.55078
1.58	5.99155	5.66628	5.5772	5.8219	5.31238	5.98244	5.58105	4.68464	5.27203	4.5521	4.5	4.55648
1.58333	5.99745	5.67198	5.5828	5.8262	5.31568	5.98584	5.58615	4.69044	5.27553	4.557	4.5049	4.56428
1.58667	6.00615	5.67638	5.587	5.8324	5.32488	5.98944	5.59055	4.69824	5.28003	4.5611	4.5115	4.57178
1.59	6.00845	5.68308	5.5941	5.8403	5.33368	5.99544	5.59255	4.70264	5.28673	4.5657	4.5121	4.57338
1.59333	6.01225	5.68858	5.5997	5.845	5.33638	6.00064	5.59925	4.70744	5.29253	4.5712	4.5153	4.57878
1.59667	6.01625	5.69538	5.6065	5.8495	5.34408	6.00624	5.60495	4.71154	5.29553	4.5742	4.521	4.58388
1.6	6.02115	5.70178	5.6137	5.8573	5.35098	6.01234	5.60995	4.71734	5.29863	4.5761	4.5271	4.58508
1.60333	6.02495	5.70658	5.6197	5.8629	5.35228	6.01654	5.61355	4.72014	5.30153	4.5823	4.5301	4.58898
1.60667	6.02475	5.70898	5.6249	5.8675	5.35728	6.02074	5.62285	4.72374	5.30413	4.5863	4.5367	4.59858
1.61	6.04005	5.71508	5.631	5.8711	5.36448	6.02524	5.62635	4.73004	5.30763	4.5908	4.5414	4.60258
1.61333	6.03635	5.71918	5.6363	5.8774	5.36808	6.03034	5.63285	4.73884	5.30953	4.5945	4.5466	4.60938
1.61667	6.04615	5.72458	5.6406	5.8788	5.37278	6.03444	5.63485	4.74524	5.31423	4.5987	4.5513	4.61518
1.62	6.05055	5.73138	5.6458	5.8816	5.37808	6.03994	5.64155	4.75024	5.31733	4.6027	4.5568	4.61938
1.62333	6.06305	5.73838	5.6524	5.8854	5.38428	6.04574	5.64505	4.75524	5.32083	4.609	4.5605	4.62238
1.62667	6.05705	5.74128	5.6592	5.8907	5.39268	6.05074	5.64935	4.76104	5.32303	4.6132	4.5664	4.62608
1.63	6.06755	5.74608	5.6641	5.8947	5.40008	6.05634	5.65225	4.76214	5.32943	4.6199	4.5718	4.62648
1.63333	6.06965	5.75028	5.6694	5.8999	5.40428	6.06164	5.65915	4.76464	5.33293	4.6255	4.5728	4.63008
1.63667	6.07375	5.75688	5.6737	5.9045	5.40878	6.06484	5.66255	4.77054	5.33883	4.63	4.5787	4.63558
1.64	6.07415	5.76148	5.6792	5.9113	5.41308	6.07014	5.66675	4.77544	5.34393	4.6345	4.5838	4.64098
1.64333	6.08025	5.76718	5.6842	5.9186	5.41398	6.07624	5.67165	4.78004	5.34993	4.6411	4.5893	4.64388
1.64667	6.08845	5.77148	5.6893	5.9233	5.41828	6.07744	5.67525	4.78544	5.35233	4.6432	4.5928	4.65078
1.65	6.09355	5.77648	5.6958	5.9302	5.42678	6.08204	5.67885	4.79094	5.35783	4.646	4.5995	4.65218
1.65333	6.10195	5.77998	5.7025	5.9342	5.43148	6.08804	5.68275	4.79614	5.36123	4.6529	4.6024	4.65408
1.65667	6.11505	5.78668	5.7087	5.9391	5.43768	6.09214	5.68665	4.80204	5.36833	4.6549	4.6048	4.65578
1.66	6.12105	5.79198	5.712	5.9408	5.44268	6.09404	5.69045	4.80684	5.37133	4.6572	4.6096	4.66318
1.66333	6.12685	5.79728	5.7182	5.9449	5.45028	6.10054	5.69345	4.81244	5.37503	4.6631	4.613	4.66618
1.66667	6.12835	5.80168	5.7224	5.9462	5.44878	6.10404	5.69815	4.81754	5.37823	4.6668	4.6161	4.67358
1.67	6.13325	5.80478	5.7263	5.9531	5.45608	6.10904	5.70445	4.82124	5.38203	4.668	4.6211	4.68008
1.67333	6.13225	5.81068	5.7307	5.9579	5.46318	6.11414	5.70725	4.82584	5.38453	4.674	4.6253	4.68388
1.67667	6.13785	5.81488	5.7369	5.9653	5.46798	6.11934	5.71165	4.83034	5.39223	4.6797	4.6302	4.68368
1.68	6.14035	5.81878	5.7417	5.9685	5.46938	6.12514	5.71845	4.83804	5.39613	4.6828	4.6329	4.68778
1.68333	6.14925	5.82478	5.7471	5.9762	5.47758	6.12924	5.72215	4.84234	5.39973	4.6895	4.6396	4.68928
1.68667	6.15145	5.82848	5.7526	5.9771	5.48078	6.13284	5.72565	4.84714	5.40433	4.6925	4.6431	4.69098
1.69	6.16305	5.83378	5.7588	5.9815	5.48228	6.13714	5.72975	4.84994	5.40963	4.6966	4.6509	4.69518
1.69333	6.16785	5.83898	5.7646	5.9853	5.48818	6.14114	5.73465	4.85294	5.41013	4.6987	4.6535	4.69998
1.69667	6.17065	5.84408	5.7703	5.9897	5.49288	6.14494	5.74055	4.85474	5.41413	4.7049	4.6571	4.70138
1.7	6.17275	5.84808	5.7761	5.9911	5.49608	6.14874	5.74285	4.85884	5.41693	4.7088	4.6617	4.70748
1.70333	6.18215	5.85378	5.7821	5.9976	5.49808	6.15364	5.74635	4.86364	5.42013	4.7138	4.6661	4.71248
1.70667	6.18325	5.85618	5.7868	6.0032	5.50778	6.15904	5.75135	4.86784	5.42073	4.7185	4.6687	4.71408
1.71	6.18765	5.86158	5.7902	6.0063	5.51188	6.16434	5.75665	4.87374	5.42453	4.7232	4.6708	4.71988
1.71333	6.19585	5.86778	5.7925	6.0103	5.51498	6.16714	5.75965	4.87884	5.43143	4.7256	4.6759	4.72778
1.71667	6.20155	5.87258	5.7966	6.0186	5.52018	6.17334	5.76675	4.88304	5.43973	4.7298	4.6808	4.73188
1.72	6.19835	5.87858	5.7986	6.0226	5.52628	6.17664	5.76905	4.88684	5.44533	4.7338	4.6816	4.73538
1.72333	6.20795	5.88428	5.8038	6.0247	5.52738	6.18024	5.77575	4.89224	5.45123	4.7383	4.6895	4.74338
1.72667	6.20865	5.88738	5.8098	6.029	5.53298	6.18344	5.77645	4.89634	5.45523	4.7425	4.6966	4.74658
1.73	6.21285	5.88968	5.8167	6.0337	5.53788	6.18724	5.77925	4.90254	5.45943	4.7457	4.7038	4.74868
1.73333	6.21745	5.89498	5.8216	6.0359	5.54348	6.18874	5.78115	4.90594	5.46283	4.7491	4.704	4.75288
1.73667	6.21965	5.90028	5.8287	6.039	5.54638	6.19184	5.78685	4.91094	5.46823	4.7528	4.7072	4.75818
1.74	6.21645	5.90588	5.8341	6.0431	5.54858	6.19504	5.78875	4.91474	5.47343	4.7566	4.7083	4.76078
1.74333	6.22195	5.91018	5.8401	6.0474	5.55338	6.20004	5.79145	4.91784	5.47943	4.7589	4.7114	4.76398
1.74667	6.22105	5.91658	5.845	6.0511	5.55818	6.20424	5.79435	4.92234	5.48233	4.7635	4.7136	4.76698
1.75	6.22275	5.92048	5.8505	6.0542	5.56118	6.21014	5.79875	4.92634	5.48623	4.7656	4.7177	4.77028
1.75333	6.23195	5.92258	5.8552	6.0601	5.56558	6.21224	5.80245	4.93034	5.48773	4.7695	4.7231	4.77258
1.75667	6.24005	5.92728	5.8611	6.0628	5.57198	6.21784	5.80505	4.93404	5.49153	4.7742	4.7268	4.77468
1.76	6.24675	5.93218	5.8647	6.0661	5.57168	6.21974	5.81075	4.93924	5.49473	4.7782	4.7289	4.77718
1.76333	6.24985	5.93598	5.8676	6.0715	5.57668	6.22304	5.81425	4.94134	5.49813	4.7805	4.7334	4.78128
1.76667	6.25255	5.93838	5.8707	6.0753	5.58078	6.22514	5.81775	4.94644	5.49843	4.7855	4.7412	4.78548
1.77	6.25985	5.94258	5.8757	6.0784	5.58678	6.23114	5.81855	4.94964	5.49993	4.7881	4.7462	4.78838
1.77333	6.26065	5.94778	5.8807	6.0816	5.59188	6.23494	5.82315	4.95444	5.50483	4.7908	4.7494	4.79488
1.77667	6.26545	5.95258	5.8863	6.0817	5.59628	6.24004	5.82685	4.95734	5.50973	4.7944	4.7549	4.79898
1.78	6.27265	5.95538	5.8907	6.0848	5.59938	6.24424	5.83105	4.96264	5.51153	4.7992	4.7589	4.80018
1.78333	6.28285	5.95878	5.8969	6.0901	5.60188	6.24894	5.83345	4.96394	5.51543	4.8027	4.7621	4.80108
1.78667	6.28285	5.96428	5.9015	6.0943	5.60718	6.25394	5.83875	4.96844	5.51993	4.8061	4.7661	4.80548
1.79	6.29025	5.96858	5.9062	6.0993	5.61298	6.25794	5.84455	4.97414	5.52343	4.8097	4.77	4.80898
1.79333	6.29055	5.97248	5.9088	6.1029	5.62038	6.26074	5.84825	4.97844	5.52793	4.8141	4.775	4.81058
1.79667	6.29565	5.97688	5.9142	6.107	5.62588	6.26524	5.85315	4.98024	5.53683	4.8173	4.778	4.81288
1.8	6.29545	5.98388	5.9185	6.1097	5.62938	6.26914	5.85675	4.98474	5.54293	4.8192	4.779	4.81528
1.80333	6.30055	5.98578	5.9221	6.1127	5.63428	6.27124	5.86065	4.99024	5.54953	4.8241	4.7837	4.81668
1.80667	6.30195	5.98908	5.9274	6.1156	5.63258	6.27274	5.86325	4.99274	5.55003	4.8278	4.7866	4.81978
1.81	6.30635	5.99218	5.9312	6.1221	5.64118	6.27574	5.86595	4.99834	5.55243	4.8297	4.7869	4.82488
1.81333	6.30975	5.99648	5.9351	6.1232	5.64288	6.27644	5.86565	5.00274	5.55303	4.8335	4.7892	4.83198
1.81667	6.31185	5.99698	5.9386	6.1284	5.65038	6.28124	5.86945	5.00854	5.55453	4.8386	4.7958	4.83738
1.82	6.31575	6.00058	5.9424	6.1338	5.65158	6.28404	5.87275	5.01184	5.55633	4.8402	4.7989	4.84238
1.82333	6.31855	6.00648	5.9461	6.138	5.65778	6.28954	5.87465	5.01634	5.56283	4.8454	4.8028	4.84298
1.82667	6.32445	6.00898	5.9524	6.1403	5.65518	6.29504	5.87805	5.01874	5.56463	4.8484	4.8096	4.84598
1.83	6.33035	6.01448	5.9579	6.1457	5.66058	6.30164	5.88325	5.02254	5.56843	4.8522	4.8162	4.85058
1.83333	6.33815	6.02028	5.9626	6.1474	5.66378	6.30124	5.88655	5.02694	5.57333	4.8554	4.8173	4.85088
1.83667	6.34235	6.02408	5.966	6.1488	5.66888	6.30504	5.89035	5.02824	5.57543	4.8602	4.8191	4.85328
1.84	6.34975	6.02548	5.9707	6.1527	5.67398	6.30964	5.89475	5.03274	5.57873	4.8628	4.8243	4.85928
1.84333	6.35635	6.03008	5.9749	6.1573	5.67918	6.31224	5.89585	5.03554	5.58203	4.8655	4.8254	4.86228
1.84667	6.35645	6.03288	5.9775	6.1603	5.68128	6.31404	5.89905	5.03694	5.58473	4.8683	4.8276	4.86458
1.85	6.35995	6.03708	5.9798	6.1644	5.68378	6.31934	5.90255	5.04034	5.58783	4.8679	4.8332	4.86938
1.85333	6.36285	6.04278	5.9857	6.1684	5.68468	6.32284	5.90625	5.04694	5.59263	4.8722	4.8381	4.87228
1.85667	6.36095	6.04718	5.9907	6.1726	5.68868	6.32594	5.90915	5.04904	5.59423	4.8758	4.8415	4.87568
1.86	6.36095	6.05118	5.994	6.1751	5.69148	6.32844	5.91475	5.05394	5.59813	4.8808	4.8482	4.87908
1.86333	6.37105	6.05348	5.9989	6.1773	5.69558	6.33044	5.92055	5.05904	5.60163	4.8835	4.8515	4.88128
1.86667	6.37285	6.05518	6.0039	6.1802	5.69988	6.33294	5.92465	5.06264	5.60313	4.8892	4.8536	4.88318
1.87	6.38175	6.05798	6.0085	6.1828	5.70388	6.33554	5.92435	5.06474	5.60583	4.89	4.8563	4.88498
1.87333	6.38645	6.06158	6.0119	6.1859	5.70748	6.33984	5.92925	5.06724	5.61083	4.8923	4.8584	4.88788
1.87667	6.39045	6.06758	6.0159	6.1905	5.70828	6.34344	5.93125	5.07094	5.61323	4.8947	4.8608	4.88968
1.88	6.39375	6.07118	6.0202	6.1905	5.71218	6.34854	5.92935	5.07434	5.61663	4.899	4.8637	4.89038
1.88333	6.40225	6.07778	6.0241	6.1956	5.71578	6.35284	5.92945	5.07764	5.62173	4.9025	4.8673	4.89218
1.88667	6.39925	6.08178	6.0271	6.1983	5.71838	6.35594	5.93345	5.08084	5.62213	4.9066	4.8728	4.89778
1.89	6.41225	6.08638	6.0305	6.2041	5.72378	6.35934	5.93625	5.08534	5.62643	4.9104	4.8786	4.89918
1.89333	6.41525	6.08878	6.0338	6.2069	5.72988	6.36104	5.93895	5.08914	5.62983	4.9134	4.8804	4.90268
1.89667	6.41575	6.09318	6.0386	6.2122	5.73228	6.36354	5.94485	5.09504	5.63303	4.9141	4.885	4.90668
1.9	6.41765	6.09378	6.0435	6.2146	5.73398	6.36594	5.95015	5.09854	5.63553	4.915	4.8894	4.91468
1.90333	6.42215	6.09728	6.0463	6.2196	5.73938	6.37074	5.95485	5.09944	5.64093	4.918	4.8922	4.91618
1.90667	6.42305	6.10178	6.0516	6.2197	5.74098	6.37324	5.95535	5.10174	5.63933	4.9205	4.8933	4.91878
1.91	6.42415	6.10478	6.0564	6.2228	5.74488	6.37794	5.96025	5.10444	5.64023	4.9251	4.8944	4.92128
1.91333	6.42575	6.10648	6.0584	6.2267	5.74708	6.38214	5.96415	5.10764	5.63903	4.9291	4.8985	4.92718
1.91667	6.42645	6.11228	6.0618	6.2293	5.74968	6.38714	5.96495	5.11074	5.64233	4.9329	4.8987	4.92688
1.92	6.42935	6.11548	6.0672	6.2311	5.75258	6.38814	5.96615	5.11474	5.64503	4.9369	4.9011	4.92928
1.92333	6.42935	6.11898	6.0714	6.2345	5.75588	6.39284	5.97125	5.11964	5.64883	4.9397	4.9051	4.93388
1.92667	6.43335	6.12078	6.0749	6.2368	5.75918	6.39624	5.97435	5.12044	5.65483	4.9405	4.9117	4.93818
1.93	6.43875	6.12588	6.0784	6.2387	5.76208	6.39764	5.97365	5.12354	5.66053	4.9437	4.9138	4.94008
1.93333	6.43775	6.12808	6.0839	6.2399	5.76668	6.39834	5.97805	5.12674	5.66183	4.9488	4.9182	4.94428
1.93667	6.44685	6.13068	6.0862	6.2439	5.76738	6.40184	5.98315	5.13304	5.66423	4.951	4.9224	4.94828
1.94	6.45275	6.13328	6.0888	6.2465	5.77218	6.40364	5.98515	5.13634	5.66963	4.9547	4.9245	4.95128
1.94333	6.45885	6.13788	6.0938	6.2507	5.77368	6.40704	5.98715	5.14154	5.67183	4.9562	4.9248	4.95508
1.94667	6.46095	6.14008	6.099	6.2529	5.77938	6.40884	5.99345	5.14414	5.67393	4.9599	4.9302	4.95488
1.95	6.46895	6.14308	6.1017	6.2586	5.78248	6.41174	5.99695	5.14654	5.67623	4.9621	4.9329	4.95598
1.95333	6.46985	6.14448	6.1075	6.2606	5.78638	6.41534	5.99865	5.14784	5.67763	4.9627	4.9365	4.95828
1.95667	6.47325	6.14778	6.1125	6.2646	5.78708	6.41834	6.00395	5.14844	5.68193	4.9663	4.9368	4.96208
1.96	6.47525	6.14848	6.115	6.2687	5.79098	6.41964	6.00375	5.15124	5.68423	4.9704	4.9394	4.96058
1.96333	6.47905	6.15128	6.1172	6.2748	5.79458	6.42444	6.00575	5.15554	5.68813	4.9714	4.9399	4.96418
1.96667	6.48455	6.15418	6.1204	6.2773	5.79618	6.42974	6.00505	5.15924	5.69203	4.9713	4.944	4.96768
1.97	6.48635	6.15998	6.1229	6.2797	5.80088	6.43274	6.00695	5.16434	5.69733	4.975	4.9478	4.96928
1.97333	6.48995	6.16038	6.127	6.2829	5.80458	6.43484	6.00845	5.16864	5.69663	4.9782	4.9541	4.96978
1.97667	6.49335	6.16428	6.1308	6.2863	5.80968	6.44064	6.01285	5.17214	5.70123	4.9811	4.9606	4.97658
1.98	6.49535	6.16828	6.1365	6.2903	5.81068	6.44214	6.01545	5.17304	5.70493	4.9842	4.9635	4.98088
1.98333	6.49815	6.17238	6.1384	6.2909	5.81698	6.44404	6.02095	5.17714	5.70993	4.9882	4.9634	4.98528
1.98667	6.50025	6.17528	6.1435	6.2911	5.81768	6.44634	6.02505	5.18034	5.71253	4.9883	4.9679	4.99068
1.99	6.50285	6.18088	6.147	6.2946	5.82038	6.45064	6.03055	5.18484	5.71723	4.9909	4.9703	4.99618
1.99333	6.50605	6.18598	6.1502	6.2957	5.81978	6.45064	6.03165	5.18764	5.71763	4.9952	4.9742	4.99748
1.99667	6.51155	6.18888	6.1513	6.2946	5.82288	6.45534	6.03255	5.19024	5.71953	4.9993	4.9775	4.99808
2	6.50595	6.19168	6.1558	6.2981	5.82678	6.45784	6.03445	5.19214	5.71943	5.002	4.9833	4.99988
2.00333	6.51005	6.19308	6.158	6.3057	5.82878	6.46134	6.03655	5.19354	5.72123	5.0073	4.9839	5.00088
2.00667	6.51205	6.19788	6.1633	6.306	5.83298	6.46424	6.03805	5.19564	5.72683	5.0077	4.9876	5.00378
2.01	6.51495	6.20068	6.1659	6.3113	5.83678	6.46764	6.04495	5.20114	5.73043	5.0099	4.9896	5.00768
2.01333	6.51755	6.20338	6.1706	6.3159	5.84018	6.46944	6.05075	5.20514	5.73323	5.0108	4.9901	5.01248
2.01667	6.52775	6.20658	6.174	6.318	5.84178	6.47194	6.05465	5.20884	5.73933	5.0152	4.9937	5.01528
2.02	6.53095	6.21148	6.1775	6.3161	5.84778	6.47494	6.05685	5.21154	5.74263	5.02	4.9944	5.01768
2.02333	6.53535	6.21418	6.1805	6.3242	5.85088	6.47694	6.05625	5.21434	5.74203	5.0255	4.9987	5.01998
2.02667	6.53965	6.21558	6.1849	6.3235	5.85358	6.47954	6.05485	5.21584	5.74473	5.0277	5.0038	5.02078
2.03	6.54075	6.21808	6.1886	6.3288	5.85458	6.48134	6.05375	5.22034	5.74733	5.0308	5.0101	5.02078
2.03333	6.54425	6.22148	6.1918	6.3343	5.85358	6.48554	6.05595	5.22174	5.74583	5.033	5.0133	5.02228
2.03667	6.54595	6.22408	6.1946	6.3405	5.85688	6.48664	6.05855	5.22444	5.74883	5.0338	5.0172	5.02308
2.04	6.55015	6.22798	6.1962	6.3407	5.86008	6.48904	6.06255	5.22704	5.75323	5.036	5.0173	5.02548
2.04333	6.55115	6.23008	6.1989	6.3458	5.86318	6.49004	6.06645	5.22964	5.75553	5.0378	5.0183	5.02668
2.04667	6.55485	6.23348	6.2029	6.3468	5.86598	6.49354	6.06875	5.22974	5.75703	5.0387	5.0215	5.03098
2.05	6.55245	6.23558	6.2063	6.3461	5.87088	6.49584	6.07025	5.23234	5.75923	5.0409	5.022	5.03408
2.05333	6.55355	6.23898	6.2108	6.3483	5.87228	6.50044	6.07365	5.23524	5.75883	5.0443	5.0226	5.03848
2.05667	6.55325	6.24168	6.2162	6.3454	5.87648	6.50354	6.07845	5.23654	5.76113	5.0461	5.0265	5.04218
2.06	6.55925	6.24688	6.2204	6.3429	5.87918	6.50884	6.08095	5.23814	5.76233	5.0471	5.0279	5.04588
2.06333	6.56245	6.24998	6.2229	6.3459	5.88268	6.51084	6.08615	5.24344	5.76373	5.0493	5.0294	5.04578
2.06667	6.57235	6.25138	6.2271	6.3512	5.88608	6.51304	6.09015	5.24464	5.76983	5.0526	5.0322	5.04638
2.07	6.57685	6.25238	6.2296	6.3534	5.88868	6.51554	6.09155	5.24914	5.77263	5.0532	5.0386	5.04788
2.07333	6.58265	6.25278	6.2315	6.3554	5.89138	6.51944	6.09335	5.25284	5.77283	5.0567	5.0415	5.05008
2.07667	6.58455	6.25628	6.2341	6.363	5.89368	6.52164	6.09635	5.25534	5.77343	5.0613	5.0428	5.05188
2.08	6.58355	6.25918	6.2363	6.3618	5.89648	6.52414	6.09755	5.25814	5.77673	5.0666	5.0473	5.05558
2.08333	6.58685	6.26278	6.2391	6.3604	5.89678	6.52654	6.10055	5.26554	5.77333	5.0666	5.0508	5.06028
2.08667	6.59225	6.26548	6.2419	6.3647	5.89738	6.52704	6.10285	5.26824	5.77663	5.0702	5.0541	5.06108
2.09	6.59545	6.26968	6.2452	6.3697	5.89858	6.52944	6.10605	5.27344	5.78293	5.0747	5.0562	5.06618
2.09333	6.59705	6.27098	6.2495	6.3723	5.90218	6.53194	6.10585	5.27854	5.78783	5.0773	5.0633	5.07168
2.09667	6.60465	6.27368	6.2532	6.3769	5.90528	6.53404	6.10855	5.27994	5.79073	5.0791	5.0645	5.07348
2.1	6.60545	6.27588	6.256	6.3809	5.90738	6.53594	6.10815	5.28054	5.79663	5.0824	5.0671	5.07288
2.10333	6.60405	6.27928	6.2584	6.3795	5.91308	6.53984	6.10985	5.28044	5.80093	5.083	5.0706	5.07658
2.10667	6.60725	6.28028	6.2624	6.3867	5.91588	6.54244	6.11175	5.27874	5.80113	5.083	5.075	5.07478
2.11	6.60525	6.28318	6.2649	6.3877	5.91688	6.54534	6.11535	5.28134	5.80293	5.0851	5.0739	5.07278
2.11333	6.60645	6.28538	6.2685	6.3926	5.92018	6.54954	6.11595	5.28164	5.80453	5.0873	5.0746	5.07738
2.11667	6.60935	6.28938	6.2713	6.3956	5.92548	6.55204	6.12015	5.28564	5.80593	5.089	5.0752	5.08198
2.12	6.61395	6.28948	6.2755	6.3999	5.92588	6.55504	6.12235	5.28944	5.80763	5.0924	5.0787	5.08458
2.12333	6.61695	6.29198	6.2785	6.401	5.93008	6.55664	6.12165	5.29574	5.81153	5.0945	5.0808	5.08818
2.12667	6.62195	6.29478	6.282	6.404	5.93218	6.55794	6.12365	5.29864	5.81383	5.0949	5.0855	5.09128
2.13	6.62425	6.29708	6.284	6.4055	5.93298	6.55934	6.12525	5.30484	5.81633	5.0956	5.0912	5.09398
2.13333	6.62425	6.29788	6.2869	6.4103	5.93418	6.56334	6.12625	5.30714	5.81803	5.0987	5.0971	5.09558
2.13667	6.63105	6.30228	6.2902	6.4139	5.93738	6.56434	6.13095	5.31154	5.81993	5.1023	5.0954	5.09928
2.14	6.62685	6.30538	6.2938	6.4132	5.93908	6.56674	6.13575	5.31324	5.82103	5.1062	5.0947	5.09918
2.14333	6.63535	6.30938	6.2979	6.4167	5.94048	6.56994	6.13615	5.31584	5.82373	5.1115	5.0983	5.10498
2.14667	6.63855	6.31088	6.3033	6.413	5.94648	6.57154	6.14225	5.31694	5.82533	5.1156	5.0994	5.10568
2.15	6.63495	6.31498	6.3073	6.4131	5.94608	6.57224	6.14415	5.31814	5.82563	5.1146	5.101	5.10938
2.15333	6.63205	6.31718	6.3113	6.4151	5.94738	6.57484	6.14515	5.31674	5.82493	5.115	5.1038	5.11068
2.15667	6.64515	6.32038	6.315	6.4199	5.94778	6.57764	6.14925	5.31974	5.82583	5.1173	5.1083	5.11528
2.16	6.64055	6.32078	6.3135	6.4197	5.95268	6.58094	6.15555	5.31674	5.82503	5.1198	5.1097	5.11608
2.16333	6.64555	6.32408	6.3146	6.4259	5.95058	6.58444	6.15635	5.32064	5.82733	5.1205	5.11	5.11808
2.16667	6.65585	6.32678	6.3174	6.4281	5.95358	6.58734	6.15735	5.32304	5.83243	5.1259	5.1133	5.11778
2.17	6.65915	6.33018	6.3176	6.4269	5.96078	6.58984	6.15625	5.32594	5.83593	5.1271	5.1177	5.11888
2.17333	6.65825	6.33258	6.3183	6.4313	5.96568	6.59204	6.15455	5.32884	5.83833	5.1305	5.1203	5.12098
2.17667	6.66705	6.33618	6.3239	6.4347	5.96618	6.59294	6.15455	5.33694	5.84253	5.1321	5.123	5.12448
2.18	6.66785	6.33868	6.3278	6.4375	5.96908	6.59364	6.15485	5.34024	5.84303	5.134	5.1268	5.12618
2.18333	6.66915	6.34118	6.329	6.4395	5.97448	6.59524	6.15775	5.34384	5.84483	5.1353	5.1286	5.12808
2.18667	6.67565	6.34358	6.3335	6.4474	5.97468	6.59794	6.16195	5.34874	5.84793	5.1375	5.1302	5.13078
2.19	6.67645	6.34518	6.3375	6.447	5.97658	6.59894	6.16805	5.35024	5.85263	5.1396	5.1328	5.13078
2.19333	6.67745	6.34928	6.3403	6.446	5.98108	6.60184	6.16885	5.35094	5.85463	5.1414	5.1318	5.13458
2.19667	6.68035	6.35338	6.3437	6.4505	5.98528	6.60624	6.17325	5.35044	5.85853	5.145	5.135	5.13678
2.2	6.68835	6.35478	6.3494	6.4531	5.98818	6.60764	6.17625	5.35114	5.86113	5.1486	5.1384	5.13918
2.20333	6.68585	6.35728	6.3511	6.4527	5.98858	6.60834	6.17995	5.35344	5.86433	5.1511	5.1403	5.13898
2.20667	6.69155	6.36158	6.3544	6.4547	5.98848	6.61064	6.18095	5.35554	5.86323	5.1518	5.1427	5.14238
2.21	6.68945	6.36288	6.3571	6.4644	5.98748	6.61334	6.18425	5.35834	5.86353	5.1526	5.1476	5.14148
2.21333	6.68995	6.36398	6.3576	6.4655	5.98828	6.61474	6.18655	5.36324	5.86523	5.1543	5.1507	5.14468
2.21667	6.68865	6.36508	6.3593	6.4691	5.98838	6.61674	6.18765	5.36744	5.86593	5.1549	5.1529	5.14738
2.22	6.69125	6.36478	6.3632	6.4729	5.99148	6.62074	6.18885	5.36874	5.86673	5.1566	5.1544	5.15238
2.22333	6.69085	6.36458	6.3656	6.4727	5.99638	6.62254	6.19245	5.37114	5.86893	5.1586	5.1572	5.15128
2.22667	6.69515	6.36818	6.3679	6.4688	6.00278	6.62664	6.19385	5.37354	5.87433	5.1603	5.1576	5.15268
2.23	6.69445	6.36958	6.3715	6.4675	6.00358	6.62834	6.19415	5.37534	5.87713	5.1613	5.1611	5.15308
2.23333	6.69725	6.37288	6.3735	6.4658	6.00928	6.63144	6.19635	5.37654	5.87833	5.164	5.1618	5.15378
2.23667	6.70195	6.37738	6.3759	6.4659	6.01008	6.63194	6.19625	5.37824	5.88073	5.1668	5.1673	5.15558
2.24	6.70145	6.38148	6.3802	6.4684	6.00928	6.63354	6.19685	5.38244	5.88413	5.1699	5.1692	5.16068
2.24333	6.71135	6.38128	6.3846	6.4747	6.00798	6.63314	6.20035	5.38394	5.88373	5.1722	5.1717	5.16268
2.24667	6.71855	6.38268	6.3859	6.4809	6.01188	6.63534	6.20375	5.38694	5.88363	5.1745	5.1716	5.16548
2.25	6.72175	6.38458	6.3876	6.4875	6.00838	6.63684	6.20495	5.38954	5.88603	5.1753	5.1742	5.16878
2.25333	6.72125	6.38578	6.3885	6.4883	6.01038	6.63964	6.20825	5.39414	5.88293	5.1759	5.1752	5.17208
2.25667	6.72825	6.38798	6.3909	6.4911	6.01488	6.64214	6.20935	5.39584	5.88203	5.1782	5.1762	5.17398
2.26	6.72005	6.39078	6.392	6.49	6.01868	6.64414	6.20935	5.39854	5.88443	5.1802	5.1776	5.17548
2.26333	6.72265	6.39498	6.3959	6.4882	6.02048	6.64614	6.21025	5.40084	5.88603	5.1821	5.1817	5.17518
2.26667	6.72065	6.39858	6.4002	6.4863	6.02328	6.64824	6.21205	5.40304	5.88803	5.185	5.1825	5.17508
2.27	6.72365	6.40128	6.4037	6.4903	6.02568	6.65124	6.21465	5.40444	5.89643	5.1889	5.1856	5.17538
2.27333	6.72805	6.40278	6.4064	6.4946	6.02608	6.65364	6.21635	5.40464	5.90053	5.1894	5.1901	5.17918
2.27667	6.73125	6.40538	6.4097	6.4994	6.02798	6.65794	6.21955	5.40604	5.90353	5.1916	5.1947	5.18448
2.28	6.73255	6.40648	6.4127	6.5043	6.02578	6.65904	6.22055	5.40604	5.90693	5.1929	5.1963	5.18878
2.28333	6.73615	6.40698	6.4145	6.5061	6.03078	6.66264	6.22325	5.40734	5.91123	5.1942	5.1998	5.19438
2.28667	6.73775	6.40848	6.4168	6.506	6.03358	6.66364	6.22335	5.40724	5.91093	5.1941	5.2007	5.19668
2.29	6.73525	6.41098	6.4181	6.5072	6.03288	6.66654	6.22595	5.41054	5.91353	5.1981	5.2017	5.19608
2.29333	6.73635	6.41348	6.4206	6.508	6.03748	6.66734	6.22845	5.41164	5.91553	5.2	5.2042	5.19458
2.29667	6.73995	6.41508	6.4235	6.5079	6.04398	6.67004	6.22855	5.41204	5.91733	5.2024	5.2047	5.19688
2.3	6.74305	6.41878	6.426	6.5075	6.04608	6.67114	6.23255	5.41484	5.91753	5.2024	5.2036	5.19748
2.30333	6.74695	6.42098	6.428	6.5071	6.04458	6.67314	6.23405	5.41924	5.91933	5.2067	5.209	5.20098
2.30667	6.75005	6.42108	6.4304	6.5065	6.04928	6.67384	6.23535	5.42114	5.91713	5.2065	5.2103	5.20308
2.31	6.75535	6.42328	6.433	6.5117	6.04768	6.67484	6.23725	5.42474	5.92173	5.2076	5.2101	5.20798
2.31333	6.75435	6.42518	6.4338	6.5145	6.05098	6.67694	6.24145	5.42994	5.92413	5.2081	5.2115	5.20828
2.31667	6.75455	6.42658	6.4356	6.5209	6.05018	6.67864	6.24145	5.43144	5.92663	5.2121	5.2191	5.20668
2.32	6.75525	6.42918	6.4396	6.528	6.05528	6.68044	6.24595	5.43364	5.92823	5.2129	5.2184	5.20618
2.32333	6.75985	6.43278	6.4437	6.5316	6.05668	6.68334	6.24755	5.43554	5.93373	5.2156	5.2207	5.20688
2.32667	6.76355	6.43638	6.4453	6.5301	6.06098	6.68674	6.24875	5.43794	5.93263	5.2181	5.2221	5.20548
2.33	6.76635	6.43958	6.45	6.5349	6.05918	6.68994	6.25185	5.43994	5.93493	5.221	5.2248	5.20588
2.33333	6.76895	6.44208	6.4529	6.5318	6.06048	6.69244	6.25315	5.44124	5.93633	5.2229	5.225	5.21118
2.33667	6.76915	6.44278	6.454	6.5283	6.06088	6.69504	6.25395	5.44214	5.93803	5.2248	5.2292	5.21298
2.34	6.77055	6.44368	6.4559	6.534	6.06448	6.69764	6.25695	5.44154	5.93843	5.2265	5.2301	5.21588
2.34333	6.77395	6.44458	6.4596	6.5377	6.06648	6.69924	6.25665	5.44414	5.94153	5.2279	5.2358	5.22318
2.34667	6.77865	6.44498	6.4611	6.5378	6.07088	6.70104	6.25805	5.44754	5.94233	5.2299	5.2385	5.22648
2.35	6.77975	6.44538	6.4631	6.5422	6.07438	6.70054	6.25925	5.44984	5.94603	5.2302	5.2415	5.22888
2.35333	6.78705	6.44828	6.4645	6.5472	6.07568	6.70164	6.26135	5.45274	5.94973	5.2325	5.2419	5.23018
2.35667	6.79455	6.44858	6.4657	6.5468	6.07828	6.70284	6.26345	5.45854	5.95193	5.2352	5.2454	5.23298
2.36	6.79115	6.45218	6.4679	6.5478	6.07918	6.70404	6.26635	5.45874	5.95073	5.2373	5.2466	5.23228
2.36333	6.79135	6.45398	6.4692	6.5459	6.07748	6.70364	6.26745	5.45854	5.95293	5.2383	5.2495	5.23248
2.36667	6.79615	6.45588	6.4699	6.5497	6.08188	6.70754	6.27165	5.46014	5.95303	5.2419	5.2506	5.23198
2.37	6.79765	6.45908	6.4756	6.5511	6.08808	6.70974	6.27465	5.46284	5.95183	5.2408	5.2513	5.23688
2.37333	6.79545	6.46378	6.479	6.5487	6.08808	6.71034	6.27435	5.46334	5.95333	5.2428	5.2554	5.23768
2.37667	6.79755	6.46358	6.482	6.5504	6.08588	6.71234	6.27825	5.46634	5.95703	5.2434	5.2572	5.23728
2.38	6.79305	6.46578	6.4848	6.5586	6.09128	6.71544	6.28075	5.46914	5.95803	5.246	5.2582	5.24178
2.38333	6.79295	6.46858	6.4899	6.5577	6.08798	6.71844	6.28005	5.47284	5.95983	5.2465	5.2608	5.24588
2.38667	6.79615	6.46918	6.4902	6.5564	6.08758	6.71874	6.28055	5.47514	5.96273	5.2494	5.2639	5.24618
2.39	6.79535	6.47088	6.4923	6.5611	6.09068	6.72004	6.28275	5.47754	5.96313	5.248	5.2634	5.24768
2.39333	6.80105	6.47228	6.4954	6.5669	6.09698	6.72274	6.28585	5.48044	5.96553	5.2519	5.2649	5.24978
2.39667	6.80685	6.47498	6.4959	6.5665	6.09848	6.72444	6.28855	5.48224	5.96703	5.2544	5.2695	5.25008
2.4	6.80945	6.47648	6.4974	6.5714	6.09958	6.72384	6.29055	5.48444	5.96433	5.2578	5.2703	5.25228
2.40333	6.81025	6.47868	6.5006	6.5805	6.10208	6.72474	6.29125	5.48774	5.96373	5.2599	5.2739	5.25388
2.40667	6.81755	6.48098	6.503	6.5827	6.10038	6.72764	6.29405	5.48864	5.96473	5.2638	5.277	5.25538
2.41	6.81785	6.48308	6.5044	6.5836	6.10258	6.72934	6.29525	5.49094	5.97053	5.2641	5.2821	5.25858
2.41333	6.81885	6.48548	6.5087	6.5873	6.10288	6.73004	6.29535	5.49424	5.97373	5.2638	5.2785	5.26248
2.41667	6.81885	6.48688	6.5105	6.5848	6.11058	6.73294	6.29725	5.49264	5.98093	5.2655	5.2829	5.26288
2.42	6.81825	6.48738	6.5127	6.589	6.10858	6.73694	6.30035	5.49234	5.98503	5.2662	5.2805	5.26468
2.42333	6.81195	6.49048	6.5152	6.5854	6.10948	6.73884	6.30175	5.49384	5.98863	5.2683	5.2813	5.26738
2.42667	6.81455	6.49468	6.5188	6.5839	6.10898	6.73884	6.30215	5.49474	5.98473	5.2722	5.2817	5.26948
2.43	6.81925	6.49668	6.5218	6.5835	6.11138	6.74014	6.30285	5.49474	5.98513	5.2745	5.2899	5.27018
2.43333	6.82215	6.49888	6.5236	6.5903	6.10908	6.74174	6.30505	5.49764	5.98263	5.2747	5.2888	5.27118
2.43667	6.82825	6.50398	6.5241	6.5832	6.11368	6.74264	6.30435	5.50064	5.98483	5.2765	5.2927	5.27308
2.44	6.83475	6.50488	6.5252	6.5924	6.11798	6.74244	6.30345	5.50594	5.99013	5.2787	5.295	5.27258
2.44333	6.83735	6.50598	6.5266	6.5941	6.12008	6.74724	6.30555	5.50764	5.99503	5.2799	5.2964	5.27558
2.44667	6.83955	6.50548	6.5262	6.597	6.12358	6.74944	6.30895	5.51114	5.99783	5.2825	5.2968	5.27718
2.45	6.84115	6.50648	6.5295	6.5942	6.12518	6.75114	6.31005	5.51374	6.00263	5.2846	5.2965	5.27958
2.45333	6.83695	6.50468	6.5327	6.599	6.12758	6.75324	6.31225	5.51104	5.99923	5.2866	5.2976	5.27968
2.45667	6.83735	6.50358	6.5344	6.5993	6.12878	6.75664	6.31705	5.50964	6.00023	5.288	5.2997	5.28218
2.46	6.84355	6.50568	6.5358	6.6038	6.13068	6.75684	6.31785	5.51004	5.99823	5.2884	5.3019	5.28268
2.46333	6.84505	6.50978	6.5392	6.6041	6.13118	6.75884	6.31825	5.50884	5.99773	5.291	5.3021	5.28438
2.46667	6.84745	6.51158	6.5404	6.607	6.13058	6.76074	6.32015	5.51214	5.99893	5.2924	5.3076	5.28518
2.47	6.84985	6.51378	6.5427	6.6106	6.12588	6.76184	6.32235	5.51864	6.00433	5.296	5.3088	5.28918
2.47333	6.85245	6.51838	6.5448	6.6103	6.12618	6.76244	6.32085	5.52254	6.00393	5.2964	5.3121	5.29138
2.47667	6.85195	6.51908	6.5484	6.6136	6.13548	6.76374	6.32195	5.52414	6.00523	5.2994	5.3156	5.29248
2.48	6.85435	6.51998	6.5499	6.6171	6.13308	6.76474	6.32265	5.53004	6.00773	5.2995	5.3177	5.29328
2.48333	6.85345	6.52048	6.5515	6.6229	6.13648	6.76544	6.32305	5.53104	6.00783	5.3023	5.3184	5.29688
2.48667	6.85195	6.52188	6.5534	6.6223	6.14058	6.76724	6.32285	5.53054	6.00883	5.3018	5.3229	5.29758
2.49	6.86075	6.52238	6.5551	6.6242	6.14548	6.76924	6.32285	5.53094	6.01023	5.302	5.3254	5.29988
2.49333	6.85365	6.52678	6.5566	6.6225	6.13788	6.77124	6.32655	5.53354	6.01453	5.3029	5.3253	5.30118
2.49667	6.85645	6.52808	6.5586	6.6242	6.14498	6.77214	6.32615	5.53124	6.01613	5.3049	5.3272	5.30298
2.5	6.86575	6.53058	6.561	6.6242	6.14678	6.77184	6.32725	5.52814	6.01873	5.3065	5.3298	5.30328
2.50333	6.87215	6.53188	6.5624	6.6265	6.14838	6.77224	6.32985	5.52994	6.02103	5.3089	5.3313	5.30408
2.50667	6.87005	6.53388	6.5652	6.629	6.14768	6.77344	6.33415	5.53194	6.01943	5.313	5.3293	5.30438
2.51	6.87575	6.53218	6.567	6.6287	6.14958	6.77484	6.33205	5.53134	6.02213	5.3127	5.3325	5.30738
2.51333	6.87715	6.53408	6.5699	6.6307	6.14878	6.77694	6.33675	5.53364	6.02213	5.3148	5.3345	5.31078
2.51667	6.87485	6.53698	6.5726	6.6301	6.14978	6.78154	6.33825	5.54064	6.02293	5.3139	5.3367	5.31198
2.52	6.87475	6.53948	6.5749	6.6326	6.15198	6.78404	6.33955	5.54414	6.02293	5.3156	5.3339	5.31348
2.52333	6.87255	6.54118	6.5774	6.6337	6.15418	6.78484	6.33915	5.54524	6.02623	5.315	5.3392	5.31498
2.52667	6.87775	6.54468	6.5787	6.6365	6.15768	6.78584	6.34575	5.54924	6.03043	5.315	5.3393	5.31488
2.53	6.87815	6.54688	6.58	6.6387	6.15778	6.78714	6.34425	5.55324	6.03643	5.3152	5.3413	5.31398
2.53333	6.88035	6.54738	6.5831	6.6354	6.15788	6.78724	6.34635	5.55324	6.03943	5.3199	5.3389	5.31638
2.53667	6.88365	6.54948	6.5852	6.6366	6.15938	6.78754	6.34635	5.55494	6.04233	5.3206	5.346	5.31678
2.54	6.88685	6.55228	6.5857	6.6434	6.16538	6.78874	6.35145	5.55704	6.04423	5.324	5.3461	5.31798
2.54333	6.88685	6.55378	6.5884	6.6461	6.16738	6.79114	6.34855	5.55804	6.04273	5.3288	5.3492	5.31768
2.54667	6.88615	6.55518	6.591	6.6402	6.16868	6.79454	6.35135	5.55834	6.03913	5.3313	5.3478	5.32098
2.55	6.88755	6.55748	6.5918	6.6486	6.17318	6.79574	6.35295	5.55834	6.03963	5.3313	5.3515	5.32048
2.55333	6.88675	6.55828	6.5938	6.6508	6.17288	6.79784	6.35465	5.55834	6.04133	5.3356	5.3522	5.32348
2.55667	6.88985	6.55918	6.5978	6.6482	6.17228	6.79854	6.35445	5.55874	6.04373	5.3357	5.356	5.32568
2.56	6.89215	6.55858	6.6013	6.6511	6.17218	6.80024	6.35705	5.55984	6.04423	5.3372	5.3558	5.33108
2.56333	6.89495	6.55898	6.6025	6.6575	6.17298	6.80204	6.35895	5.56314	6.04923	5.3368	5.3588	5.33098
2.56667	6.89285	6.55948	6.6043	6.6564	6.17388	6.80334	6.35845	5.56734	6.04873	5.3379	5.3631	5.33288
2.57	6.89245	6.56038	6.6061	6.6578	6.17598	6.80474	6.36155	5.57004	6.04773	5.3365	5.3653	5.33288
2.57333	6.89115	6.56098	6.606	6.66	6.17348	6.80994	6.35965	5.57384	6.04883	5.3377	5.3642	5.33268
2.57667	6.90025	6.56398	6.6064	6.6631	6.17618	6.81094	6.36125	5.57734	6.05283	5.3394	5.3668	5.33438
2.58	6.89755	6.56618	6.6081	6.6649	6.18048	6.80944	6.35915	5.57674	6.05373	5.3429	5.3703	5.33558
2.58333	6.89775	6.56818	6.6104	6.6656	6.18088	6.81134	6.36285	5.57794	6.05783	5.3433	5.3717	5.33698
2.58667	6.90415	6.57188	6.6108	6.6665	6.18378	6.81284	6.36365	5.57914	6.06253	5.346	5.3728	5.33648
2.59	6.90725	6.57328	6.615	6.6654	6.18648	6.81284	6.36795	5.58094	6.06293	5.3489	5.3757	5.33758
2.59333	6.90285	6.57458	6.6174	6.6685	6.18798	6.81614	6.36575	5.58244	6.05853	5.3513	5.3751	5.33868
2.59667	6.90795	6.57588	6.6193	6.6638	6.18698	6.81904	6.36945	5.58514	6.05933	5.3518	5.3784	5.34248
2.6	6.91485	6.57698	6.62	6.673	6.19078	6.82124	6.37015	5.58584	6.06023	5.3555	5.3791	5.34548
2.60333	6.92005	6.57778	6.6238	6.6712	6.19048	6.82284	6.37215	5.58634	6.06113	5.3549	5.3788	5.34918
2.60667	6.91965	6.58008	6.6245	6.6788	6.19238	6.82344	6.37275	5.58444	6.06393	5.354	5.3776	5.35168
2.61	6.91895	6.58208	6.6282	6.6761	6.19398	6.82254	6.37635	5.58334	6.06893	5.3547	5.3799	5.34988
2.61333	6.92595	6.58518	6.6319	6.6853	6.19478	6.82284	6.37725	5.58424	6.06953	5.3549	5.3815	5.34928
2.61667	6.93085	6.58648	6.6349	6.6837	6.19368	6.82304	6.37725	5.58554	6.07043	5.3551	5.383	5.34788
2.62	6.92615	6.58768	6.6357	6.686	6.19418	6.82534	6.37635	5.58824	6.07033	5.3582	5.3871	5.34828
2.62333	6.92995	6.59008	6.6376	6.6838	6.19398	6.82644	6.37725	5.59314	6.07073	5.3613	5.3905	5.35008
2.62667	6.93515	6.59128	6.6386	6.6858	6.19508	6.82934	6.37935	5.59504	6.07103	5.3635	5.3939	5.35428
2.63	6.92975	6.59018	6.638	6.6858	6.19538	6.83114	6.38295	5.59824	6.07163	5.3646	5.3943	5.35218
2.63333	6.92845	6.59218	6.64	6.6853	6.19578	6.83144	6.38395	5.60244	6.07303	5.365	5.3937	5.35438
2.63667	6.93315	6.59438	6.6416	6.6896	6.19818	6.83204	6.38505	5.60314	6.07623	5.366	5.3964	5.35788
2.64	6.93525	6.59488	6.6442	6.6904	6.19888	6.83274	6.38715	5.60374	6.07893	5.3648	5.3979	5.35968
2.64333	6.93355	6.59848	6.6459	6.6904	6.19688	6.83414	6.39035	5.60684	6.08363	5.3669	5.4005	5.35938
2.64667	6.93675	6.60118	6.6476	6.6872	6.19708	6.83484	6.39065	5.60734	6.08683	5.37	5.4007	5.36238
2.65	6.94005	6.60158	6.6476	6.6903	6.19538	6.83724	6.39285	5.60764	6.08993	5.3717	5.4041	5.36518
2.65333	6.94485	6.60158	6.6497	6.6932	6.20308	6.83964	6.39435	5.60974	6.08743	5.3707	5.4047	5.36568
2.65667	6.94955	6.60398	6.6516	6.6949	6.20618	6.84104	6.39395	5.61184	6.08783	5.3745	5.4078	5.36708
2.66	6.95325	6.60248	6.6526	6.6959	6.20658	6.84174	6.39625	5.61204	6.08383	5.3747	5.4034	5.36968
2.66333	6.95995	6.60188	6.6558	6.6956	6.21128	6.84354	6.39835	5.61394	6.08183	5.3746	5.4049	5.37298
2.66667	6.95805	6.60268	6.6579	6.6947	6.21568	6.84434	6.39905	5.61304	6.07923	5.3749	5.4083	5.37158
2.67	6.95635	6.60498	6.6603	6.6928	6.21128	6.84454	6.40265	5.61374	6.08173	5.3783	5.4106	5.37398
2.67333	6.95335	6.60428	6.6602	6.6916	6.21058	6.84574	6.40595	5.61534	6.08323	5.3787	5.4131	5.37248
2.67667	6.95495	6.60648	6.6636	6.6963	6.21348	6.84764	6.40455	5.61754	6.08613	5.3807	5.4175	5.37488
2.68	6.95595	6.60978	6.6651	6.6994	6.21298	6.84954	6.40455	5.61904	6.09143	5.3807	5.4223	5.37598
2.68333	6.95295	6.61418	6.6679	6.7008	6.21478	6.85054	6.40715	5.62054	6.09573	5.3835	5.4242	5.37918
2.68667	6.95065	6.61548	6.6694	6.7003	6.21918	6.85154	6.40595	5.61994	6.09883	5.3856	5.4236	5.37798
2.69	6.95085	6.61748	6.6708	6.7002	6.22118	6.85354	6.40765	5.62004	6.10043	5.3873	5.4253	5.38068
2.69333	6.95785	6.61908	6.6707	6.7049	6.22178	6.85474	6.40925	5.62144	6.10373	5.3884	5.4279	5.38288
2.69667	6.95045	6.61928	6.6709	6.7116	6.22498	6.85404	6.41175	5.62184	6.10163	5.3882	5.4294	5.38308
2.7	6.95105	6.61638	6.6718	6.7132	6.22568	6.85544	6.41215	5.62494	6.10273	5.3902	5.4297	5.38278
2.70333	6.95855	6.61508	6.6726	6.7193	6.22628	6.85524	6.41405	5.62774	6.10403	5.3921	5.4304	5.38438
2.70667	6.95975	6.61558	6.6747	6.7206	6.22778	6.85694	6.41415	5.63084	6.10583	5.394	5.4309	5.38398
2.71	6.95365	6.61728	6.6775	6.7164	6.23048	6.85814	6.41565	5.63344	6.10383	5.3931	5.4355	5.38398
2.71333	6.95905	6.61998	6.6797	6.7138	6.22948	6.86094	6.41525	5.63554	6.10463	5.3983	5.4344	5.38448
2.71667	6.96665	6.62438	6.6814	6.7139	6.22948	6.86224	6.41785	5.63954	6.10343	5.3989	5.4341	5.38658
2.72	6.96475	6.62648	6.6832	6.7113	6.22718	6.86414	6.41825	5.64234	6.10193	5.3984	5.4367	5.38678
2.72333	6.96925	6.62858	6.6849	6.7164	6.22898	6.86444	6.42085	5.64374	6.09863	5.3995	5.437	5.39018
2.72667	6.97575	6.62898	6.6872	6.7218	6.23138	6.86694	6.42045	5.64504	6.10223	5.403	5.4339	5.39208
2.73	6.97525	6.63128	6.6896	6.7203	6.23148	6.86684	6.42005	5.64594	6.10053	5.4018	5.4353	5.39558
2.73333	6.97585	6.63208	6.6916	6.7215	6.23248	6.86854	6.42135	5.64594	6.10003	5.4033	5.4387	5.39848
2.73667	6.97895	6.63338	6.6934	6.7246	6.23148	6.86904	6.42305	5.64744	6.10033	5.4056	5.441	5.40238
2.74	6.97645	6.63368	6.6946	6.724	6.23218	6.87154	6.42255	5.64964	6.10423	5.406	5.4422	5.40528
2.74333	6.97535	6.63928	6.6963	6.7224	6.23908	6.87104	6.42465	5.65024	6.10313	5.4072	5.4457	5.40478
2.74667	6.98505	6.63878	6.6962	6.7251	6.24038	6.87324	6.42735	5.65124	6.10543	5.4082	5.4441	5.40468
2.75	6.98475	6.64128	6.6972	6.7277	6.24378	6.87264	6.42695	5.65154	6.10893	5.4075	5.4478	5.40378
2.75333	6.98835	6.64348	6.6986	6.7273	6.24768	6.87434	6.42945	5.65224	6.11283	5.409	5.4482	5.40288
2.75667	6.99045	6.64658	6.6986	6.7283	6.24908	6.87484	6.42785	5.65114	6.11393	5.4117	5.4492	5.40258
2.76	6.99335	6.64598	6.6989	6.729	6.24488	6.87634	6.43175	5.65244	6.11643	5.4123	5.4475	5.40498
2.76333	6.99025	6.64808	6.7021	6.7261	6.24548	6.87754	6.43365	5.65294	6.11923	5.415	5.4534	5.40598
2.76667	6.99625	6.64658	6.7033	6.7293	6.24198	6.87884	6.43465	5.65264	6.12163	5.4151	5.4539	5.40698
2.77	7.00025	6.64628	6.7057	6.7304	6.24218	6.88084	6.43315	5.65364	6.12293	5.4164	5.4552	5.41088
2.77333	7.00215	6.64588	6.7098	6.7405	6.24628	6.88174	6.43725	5.65384	6.12323	5.4168	5.4555	5.41138
2.77667	7.00155	6.64588	6.7105	6.7413	6.24978	6.88204	6.43545	5.65344	6.12433	5.4179	5.4578	5.41198
2.78	6.99735	6.64628	6.7101	6.7507	6.25248	6.88354	6.43775	5.65434	6.12563	5.4188	5.4613	5.41238
2.78333	6.99125	6.64828	6.7113	6.7504	6.25738	6.88604	6.43885	5.65774	6.12833	5.4208	5.458	5.41568
2.78667	6.98675	6.65208	6.7119	6.7541	6.25738	6.88704	6.44275	5.65934	6.12983	5.4194	5.4602	5.41448
2.79	6.98895	6.65208	6.7121	6.7462	6.25548	6.88894	6.44475	5.66324	6.13273	5.4203	5.4634	5.41668
2.79333	6.99505	6.65318	6.7168	6.7482	6.25678	6.89164	6.44645	5.66674	6.13353	5.4222	5.4675	5.41628
2.79667	6.99895	6.65638	6.7199	6.7484	6.25888	6.89314	6.44545	5.67144	6.13643	5.4225	5.4664	5.41918
2.8	7.00635	6.65658	6.724	6.7489	6.26258	6.89534	6.44595	5.67244	6.13483	5.4236	5.4674	5.41888
2.80333	7.00405	6.65588	6.7254	6.7481	6.26598	6.89704	6.44655	5.67394	6.13563	5.4271	5.4694	5.42178
2.80667	7.00295	6.65858	6.728	6.7507	6.26708	6.89714	6.44755	5.67414	6.13783	5.4283	5.4698	5.42208
2.81	7.00015	6.66058	6.7278	6.7538	6.26628	6.89844	6.44795	5.67534	6.13903	5.4287	5.4718	5.42228
2.81333	7.00425	6.66118	6.7295	6.756	6.26658	6.89694	6.45005	5.67454	6.13773	5.4307	5.474	5.42538
2.81667	7.00615	6.66408	6.728	6.7593	6.26388	6.89624	6.45425	5.67534	6.13493	5.4327	5.4781	5.42618
2.82	7.01025	6.66498	6.7313	6.7599	6.26568	6.89794	6.45505	5.67634	6.13293	5.4331	5.4785	5.42658
2.82333	7.01245	6.66578	6.7322	6.7631	6.26838	6.89944	6.45545	5.67804	6.13143	5.434	5.4816	5.42788
2.82667	7.01395	6.66648	6.7343	6.7646	6.26898	6.90094	6.45875	5.68004	6.13463	5.4361	5.4815	5.43158
2.83	7.01455	6.66668	6.7359	6.7664	6.26988	6.90334	6.45975	5.68184	6.13793	5.4354	5.4809	5.43268
2.83333	7.01285	6.66778	6.7383	6.7661	6.27468	6.90514	6.45855	5.68484	6.13953	5.4395	5.4829	5.43658
2.83667	7.01015	6.66988	6.7373	6.7709	6.27288	6.90544	6.45905	5.68844	6.14253	5.4384	5.4835	5.43568
2.84	7.00975	6.67028	6.7385	6.7693	6.26918	6.90514	6.45845	5.68934	6.14223	5.4414	5.4838	5.43618
2.84333	7.01855	6.67278	6.7391	6.7663	6.27558	6.90504	6.45905	5.68774	6.14673	5.441	5.4859	5.43718
2.84667	7.01545	6.67428	6.7403	6.7651	6.27258	6.90744	6.46125	5.68824	6.14873	5.4451	5.4854	5.43528
2.85	7.01155	6.67458	6.7412	6.7659	6.27008	6.90844	6.46045	5.68734	6.15423	5.4427	5.487	5.43308
2.85333	7.01855	6.67528	6.7431	6.7668	6.27238	6.90864	6.46175	5.68484	6.15753	5.4456	5.4874	5.43608
2.85667	7.02195	6.67718	6.7453	6.7692	6.27528	6.91104	6.46345	5.68344	6.16213	5.4449	5.4906	5.43888
2.86	7.01725	6.67758	6.7474	6.7719	6.27248	6.91344	6.46375	5.68704	6.15993	5.4469	5.4915	5.43988
2.86333	7.02665	6.67728	6.7487	6.7721	6.27758	6.91334	6.46135	5.68964	6.16023	5.4467	5.4956	5.44138
2.86667	7.03085	6.67838	6.7511	6.7738	6.27828	6.91434	6.46505	5.69234	6.16053	5.4474	5.4961	5.44138
2.87	7.03245	6.68008	6.7528	6.7709	6.27878	6.91474	6.46545	5.69774	6.15923	5.4478	5.4966	5.44068
2.87333	7.03435	6.68068	6.7524	6.7715	6.27948	6.91454	6.46535	5.70254	6.15583	5.4495	5.4986	5.43988
2.87667	7.03305	6.68108	6.7531	6.7744	6.28158	6.91504	6.46795	5.70444	6.15473	5.4519	5.5003	5.44158
2.88	7.03165	6.68328	6.7549	6.7731	6.28208	6.91484	6.46945	5.70404	6.15673	5.4535	5.5012	5.44468
2.88333	7.03675	6.68358	6.7574	6.7747	6.28348	6.91574	6.46895	5.70224	6.15463	5.4564	5.5046	5.44548
2.88667	7.03695	6.68478	6.7581	6.7752	6.28548	6.91884	6.47235	5.70134	6.15533	5.4571	5.5073	5.44698
2.89	7.03655	6.68708	6.7623	6.7741	6.28608	6.92014	6.47465	5.70314	6.15733	5.4587	5.5073	5.44918
2.89333	7.03885	6.68918	6.7642	6.7755	6.28668	6.92124	6.47435	5.70444	6.15973	5.4596	5.5074	5.45008
2.89667	7.03655	6.69058	6.7645	6.7811	6.28868	6.92314	6.47925	5.70904	6.15763	5.4595	5.509	5.45138
2.9	7.03785	6.69258	6.7641	6.7743	6.28918	6.92514	6.47895	5.71344	6.16023	5.4593	5.5091	5.45268
2.90333	7.03985	6.69388	6.765	6.786	6.28828	6.92474	6.47915	5.71324	6.16333	5.4587	5.5077	5.45218
2.90667	7.04585	6.69398	6.765	6.7919	6.28978	6.92644	6.48055	5.71274	6.16573	5.4601	5.5067	5.45298
2.91	7.04425	6.69468	6.7676	6.7932	6.29078	6.92764	6.48425	5.70944	6.16683	5.4592	5.5082	5.45518
2.91333	7.04675	6.69568	6.7694	6.791	6.29088	6.92794	6.48135	5.70804	6.16833	5.4606	5.5105	5.45288
2.91667	7.04445	6.69998	6.7717	6.7994	6.29368	6.92724	6.48605	5.71024	6.17293	5.4627	5.5091	5.45538
2.92	7.04155	6.70068	6.7748	6.7951	6.29668	6.92734	6.48575	5.71404	6.17163	5.4676	5.515	5.45808
2.92333	7.03885	6.70338	6.7759	6.7951	6.29748	6.92774	6.48675	5.71604	6.17203	5.4659	5.5199	5.45888
2.92667	7.04645	6.70338	6.7765	6.7915	6.29888	6.92634	6.48615	5.71894	6.17413	5.4683	5.5216	5.45938
2.93	7.04765	6.70298	6.7792	6.7978	6.29988	6.92944	6.48885	5.71844	6.17653	5.4687	5.5221	5.46178
2.93333	7.04515	6.70128	6.7795	6.8015	6.30068	6.93074	6.48675	5.71554	6.17533	5.4705	5.5243	5.46238
2.93667	7.05455	6.70268	6.7798	6.803	6.30158	6.93324	6.48765	5.71504	6.17823	5.4698	5.524	5.46458
2.94	7.05485	6.70018	6.7806	6.8049	6.30438	6.93354	6.48905	5.71864	6.18103	5.4716	5.524	5.46648
2.94333	7.05425	6.70218	6.7834	6.8062	6.30378	6.93654	6.48945	5.72384	6.18313	5.4732	5.5257	5.46648
2.94667	7.05455	6.70308	6.7832	6.8031	6.30428	6.93744	6.49035	5.72764	6.18223	5.4748	5.5233	5.46808
2.95	7.06515	6.70418	6.7857	6.8006	6.30648	6.93894	6.49235	5.72744	6.18233	5.4745	5.5239	5.46838
2.95333	7.06055	6.70498	6.7884	6.7965	6.30468	6.94004	6.49545	5.72654	6.18263	5.4762	5.5278	5.46938
2.95667	7.06235	6.70878	6.7896	6.7946	6.30588	6.94054	6.49795	5.72134	6.18443	5.4769	5.5291	5.46698
2.96	7.05415	6.70818	6.7901	6.8025	6.30478	6.94304	6.49835	5.72064	6.18143	5.4786	5.5309	5.46978
2.96333	7.05915	6.70978	6.7927	6.8065	6.30498	6.94414	6.49745	5.71904	6.18213	5.4815	5.5323	5.46918
2.96667	7.05855	6.71148	6.794	6.8093	6.30318	6.94614	6.49805	5.72104	6.18413	5.4827	5.5374	5.46968
2.97	7.05775	6.71358	6.7923	6.8148	6.30658	6.94704	6.49735	5.72134	6.18523	5.4815	5.5366	5.46808
2.97333	7.06295	6.71368	6.7962	6.8146	6.30528	6.94764	6.49755	5.72624	6.18703	5.481	5.5382	5.47188
2.97667	7.06785	6.71408	6.7979	6.8161	6.30908	6.94724	6.49905	5.72824	6.19183	5.4793	5.5351	5.47128
2.98	7.06705	6.71858	6.7973	6.8184	6.31348	6.94714	6.50095	5.73194	6.19403	5.4787	5.5411	5.47318
2.98333	7.06505	6.71758	6.7991	6.8129	6.31348	6.94654	6.50135	5.73484	6.19573	5.4798	5.5397	5.47348
2.98667	7.06745	6.71598	6.8025	6.8067	6.31358	6.94684	6.50155	5.73894	6.19713	5.4823	5.5373	5.47578
2.99	7.06305	6.71628	6.8031	6.8136	6.31488	6.94854	6.50075	5.73984	6.19513	5.4859	5.5356	5.47878
2.99333	7.06705	6.72038	6.803	6.8102	6.31458	6.94874	6.49915	5.73984	6.19353	5.4897	5.5396	5.48048
2.99667	7.06905	6.71828	6.8059	6.8055	6.31428	6.95054	6.50225	5.74014	6.19633	5.4917	5.5398	5.47998
3	7.07245	6.72188	6.8062	6.8108	6.31988	6.95184	6.50435	5.74134	6.19773	5.4931	5.542	5.48228
3.00333	7.07305	6.72238	6.8071	6.8153	6.31838	6.95244	6.50605	5.74124	6.19883	5.4941	5.5465	5.48528
3.00667	7.07795	6.72508	6.8091	6.8123	6.31848	6.95474	6.50655	5.73814	6.20203	5.4944	5.551	5.48558
3.01	7.07615	6.72528	6.8126	6.8188	6.32448	6.95654	6.51045	5.73744	6.20403	5.4924	5.5516	5.48718
3.01333	7.07865	6.72588	6.8132	6.82	6.32088	6.95594	6.51135	5.73854	6.20503	5.4941	5.5524	5.49018
3.01667	7.07775	6.72608	6.813	6.8224	6.31788	6.95564	6.51095	5.73884	6.20503	5.4953	5.5533	5.49218
3.02	7.08255	6.72698	6.8143	6.8243	6.32238	6.95754	6.51075	5.74174	6.20403	5.4953	5.554	5.49088
3.02333	7.07845	6.72678	6.8143	6.8271	6.32218	6.95754	6.51255	5.74774	6.20233	5.4962	5.5531	5.48978
3.02667	7.08145	6.72808	6.8146	6.8242	6.31918	6.95664	6.51345	5.75074	6.20283	5.5002	5.5567	5.48848
3.03	7.07755	6.72998	6.8152	6.825	6.32448	6.95954	6.51225	5.75134	6.20593	5.4975	5.5569	5.48908
3.03333	7.07785	6.72948	6.8169	6.8177	6.32368	6.96284	6.51135	5.75444	6.20863	5.4988	5.5573	5.48998
3.03667	7.07375	6.73138	6.8181	6.8202	6.32088	6.96144	6.51525	5.75094	6.21303	5.4979	5.5598	5.48988
3.04	7.08075	6.73228	6.8186	6.8199	6.32698	6.96234	6.51595	5.75014	6.21343	5.4993	5.5604	5.49218
3.04333	7.08245	6.73228	6.8183	6.8158	6.32138	6.96474	6.51615	5.75224	6.21473	5.4996	5.5626	5.49288
3.04667	7.08845	6.73248	6.8193	6.8153	6.32228	6.96474	6.51805	5.75254	6.21243	5.5028	5.5654	5.49508
3.05	7.08845	6.73498	6.8222	6.8257	6.32658	6.96394	6.51955	5.75434	6.21043	5.5022	5.5664	5.49558
3.05333	7.09415	6.73658	6.8241	6.822	6.32748	6.96804	6.51935	5.76024	6.20903	5.5072	5.5663	5.49728
3.05667	7.09255	6.73658	6.8269	6.8197	6.32508	6.97004	6.52125	5.76134	6.21063	5.5082	5.5686	5.49888
3.06	7.09145	6.73638	6.829	6.8256	6.33028	6.97074	6.52075	5.76174	6.21223	5.5069	5.5675	5.50488
3.06333	7.08915	6.73758	6.8305	6.8222	6.32738	6.97274	6.52295	5.76234	6.21573	5.5062	5.5683	5.50588
3.06667	7.09065	6.73838	6.8314	6.8191	6.32958	6.97264	6.52415	5.76044	6.21853	5.5068	5.5697	5.50818
3.07	7.08585	6.73598	6.8312	6.8284	6.33248	6.97134	6.52485	5.76024	6.22233	5.5056	5.5694	5.51128
3.07333	7.08545	6.73768	6.8305	6.8278	6.33308	6.97114	6.52415	5.76364	6.22313	5.5056	5.5724	5.51148
3.07667	7.09035	6.73888	6.8315	6.8276	6.33528	6.97174	6.52605	5.76274	6.22103	5.5099	5.5713	5.51118
3.08	7.09465	6.73978	6.8335	6.8351	6.33848	6.97184	6.52565	5.76234	6.21853	5.5127	5.5704	5.51388
3.08333	7.09775	6.74048	6.8346	6.8359	6.33498	6.97434	6.52935	5.76224	6.21883	5.5137	5.571	5.51468
3.08667	7.10185	6.74378	6.8357	6.8288	6.33458	6.97514	6.52845	5.76144	6.21723	5.5149	5.5746	5.51458
3.09	7.09815	6.74418	6.8375	6.8315	6.33668	6.97694	6.52895	5.76294	6.21953	5.5148	5.5739	5.51238
3.09333	7.09955	6.74658	6.8391	6.8308	6.33788	6.97834	6.52885	5.76684	6.22273	5.5122	5.5759	5.51008
3.09667	7.10265	6.74758	6.8399	6.8328	6.33568	6.98014	6.52915	5.77234	6.22533	5.5127	5.5788	5.50648
3.1	7.10375	6.74688	6.8397	6.8345	6.33728	6.98054	6.52915	5.77324	6.22383	5.5141	5.5808	5.50398
3.10333	7.10655	6.74928	6.8427	6.8357	6.33958	6.98164	6.53245	5.77284	6.22343	5.5162	5.5782	5.50188
3.10667	7.11085	6.75138	6.8438	6.8358	6.33928	6.98134	6.53445	5.77154	6.22413	5.5182	5.5809	5.50538
3.11	7.10685	6.75048	6.845	6.8349	6.33898	6.98104	6.53625	5.77034	6.22593	5.5215	5.5846	5.50778
3.11333	7.10555	6.75248	6.8468	6.8356	6.34108	6.98184	6.53745	5.77094	6.22743	5.5198	5.5874	5.51008
3.11667	7.10765	6.75368	6.8495	6.8371	6.34178	6.98324	6.53875	5.77574	6.23373	5.5207	5.5885	5.51508
3.12	7.10735	6.75188	6.8493	6.8396	6.34098	6.98414	6.53715	5.77714	6.23653	5.5193	5.5928	5.52028
3.12333	7.11355	6.75358	6.8511	6.8398	6.34188	6.98444	6.53865	5.77844	6.23763	5.5199	5.5919	5.51948
3.12667	7.11415	6.75528	6.8528	6.8471	6.34148	6.98754	6.54115	5.77754	6.23893	5.521	5.5924	5.51898
3.13	7.11355	6.75388	6.8548	6.8461	6.34348	6.98754	6.54145	5.77724	6.24033	5.5243	5.5895	5.52368
3.13333	7.11235	6.75478	6.855	6.8483	6.34438	6.98844	6.54115	5.77654	6.23763	5.5254	5.5945	5.52238
3.13667	7.10605	6.75778	6.8567	6.85	6.34738	6.99054	6.54235	5.78084	6.23813	5.5267	5.5927	5.52248
3.14	7.10145	6.75708	6.8583	6.8521	6.34988	6.99044	6.54165	5.78324	6.23933	5.5283	5.5935	5.52498
3.14333	7.10895	6.75778	6.858	6.852	6.35198	6.99064	6.54045	5.78804	6.23573	5.528	5.5925	5.52758
3.14667	7.11305	6.76018	6.8581	6.8554	6.35388	6.99074	6.54075	5.78784	6.23563	5.5288	5.594	5.52428
3.15	7.11245	6.76188	6.8601	6.8544	6.35478	6.99044	6.54005	5.78914	6.23613	5.5279	5.5927	5.52748
3.15333	7.11655	6.76108	6.86	6.849	6.35418	6.98894	6.53825	5.78844	6.23353	5.5287	5.5932	5.52678
3.15667	7.12215	6.76168	6.8612	6.8448	6.35108	6.99094	6.53975	5.78834	6.23203	5.5285	5.5948	5.52738
3.16	7.11705	6.76328	6.8632	6.8371	6.35198	6.99074	6.54245	5.78644	6.23473	5.5294	5.5979	5.52638
3.16333	7.11875	6.76458	6.8628	6.8448	6.35218	6.99184	6.54165	5.78694	6.23333	5.5306	5.6009	5.52598
3.16667	7.12075	6.76588	6.8626	6.8485	6.35808	6.99194	6.54355	5.78464	6.23533	5.5328	5.6016	5.52568
3.17	7.12815	6.76668	6.8638	6.8558	6.35568	6.99514	6.54735	5.78324	6.23613	5.5339	5.603	5.52718
3.17333	7.13065	6.76718	6.8625	6.8641	6.35248	6.99624	6.54805	5.78224	6.24053	5.5363	5.6061	5.52888
3.17667	7.13255	6.76648	6.8643	6.8704	6.35288	6.99794	6.54775	5.78314	6.24153	5.5378	5.6038	5.53078
3.18	7.12765	6.76478	6.867	6.8622	6.35588	6.99944	6.55025	5.78404	6.24133	5.5368	5.6045	5.53458
3.18333	7.13265	6.76478	6.8695	6.8586	6.34938	7.00254	6.54925	5.78624	6.23943	5.5373	5.6017	5.53438
3.18667	7.13075	6.76648	6.8709	6.8569	6.35378	7.00154	6.55125	5.78784	6.24213	5.5377	5.6044	5.53498
3.19	7.13295	6.76898	6.8724	6.8546	6.35798	7.00164	6.55035	5.78934	6.23943	5.5385	5.6056	5.53178
3.19333	7.13635	6.77078	6.8728	6.855	6.35938	7.00184	6.55275	5.79134	6.23863	5.539	5.6093	5.53338
3.19667	7.13255	6.77228	6.8745	6.8599	6.35718	7.00194	6.55535	5.79414	6.24453	5.5418	5.6087	5.53538
3.2	7.13065	6.77408	6.8735	6.859	6.35978	7.00144	6.55965	5.79764	6.24613	5.5439	5.6119	5.53848
3.20333	7.13415	6.77408	6.8752	6.8621	6.35798	7.00164	6.56095	5.80054	6.24883	5.5454	5.6138	5.54018
3.20667	7.13675	6.77268	6.8768	6.8612	6.36048	7.00454	6.56395	5.80254	6.25003	5.5468	5.6143	5.54328
3.21	7.13585	6.77318	6.8779	6.8631	6.35838	7.00564	6.56175	5.80394	6.25143	5.5477	5.6165	5.53998
3.21333	7.13835	6.77608	6.8783	6.8607	6.35918	7.00594	6.55895	5.80484	6.24953	5.5464	5.6193	5.53898
3.21667	7.13775	6.77328	6.8808	6.8632	6.35968	7.00684	6.55795	5.80714	6.25193	5.5448	5.6216	5.53468
3.22	7.13675	6.77468	6.8802	6.8607	6.36588	7.00974	6.55575	5.80884	6.24883	5.5458	5.6208	5.53298
3.22333	7.12985	6.77728	6.8815	6.8639	6.36578	7.00834	6.55555	5.80934	6.24853	5.5429	5.6164	5.53478
3.22667	7.13025	6.77858	6.8823	6.8639	6.36888	7.00954	6.55635	5.80564	6.25123	5.5443	5.6185	5.54008
3.23	7.13505	6.77868	6.883	6.8653	6.36838	7.01054	6.56025	5.80524	6.25463	5.5484	5.6206	5.54178
3.23333	7.13535	6.78028	6.8836	6.8681	6.37058	7.01034	6.55915	5.80204	6.25543	5.5498	5.6209	5.54498
3.23667	7.13645	6.78078	6.886	6.8692	6.36638	7.00984	6.56155	5.79924	6.25953	5.5515	5.6234	5.54908
3.24	7.13935	6.78178	6.8869	6.8698	6.36818	7.01114	6.56375	5.79894	6.26243	5.5524	5.6275	5.54938
3.24333	7.13795	6.78188	6.8867	6.8655	6.36718	7.00984	6.56685	5.80264	6.26153	5.5548	5.628	5.54928
3.24667	7.14105	6.78198	6.8881	6.8654	6.36828	7.01164	6.56455	5.80194	6.25603	5.5548	5.6255	5.54718
3.25	7.14945	6.78528	6.889	6.868	6.36718	7.01354	6.56665	5.80264	6.25403	5.5571	5.6267	5.54848
3.25333	7.14745	6.78478	6.8909	6.8595	6.36738	7.01474	6.56625	5.80524	6.25063	5.5567	5.6282	5.54758
3.25667	7.15155	6.78398	6.8913	6.863	6.36818	7.01584	6.56405	5.80774	6.24963	5.559	5.629	5.54688
3.26	7.15255	6.78578	6.894	6.8663	6.37028	7.01664	6.56445	5.80904	6.25123	5.558	5.6282	5.54398
3.26333	7.15365	6.78718	6.8953	6.8686	6.37368	7.01784	6.56505	5.81144	6.25403	5.5567	5.6291	5.54518
3.26667	7.14965	6.78678	6.8972	6.8671	6.37368	7.01944	6.56605	5.81344	6.25553	5.5556	5.6305	5.54618
3.27	7.15445	6.78868	6.8989	6.8777	6.37768	7.02044	6.56905	5.81514	6.26123	5.5547	5.6313	5.54638
3.27333	7.15075	6.79078	6.901	6.877	6.37678	7.02264	6.57335	5.81514	6.26443	5.5549	5.6322	5.54748
3.27667	7.15585	6.79128	6.9012	6.8748	6.37728	7.02424	6.57525	5.81704	6.26693	5.5556	5.6341	5.54928
3.28	7.15255	6.79238	6.9007	6.8733	6.37398	7.02444	6.57655	5.81954	6.26693	5.5592	5.634	5.55148
3.28333	7.15085	6.79478	6.9004	6.8795	6.37758	7.02574	6.57955	5.82084	6.26853	5.5619	5.6352	5.55128
3.28667	7.15365	6.79498	6.8989	6.8819	6.37468	7.02564	6.57765	5.82264	6.26653	5.5664	5.6337	5.55218
3.29	7.14915	6.79508	6.8981	6.883	6.37638	7.02534	6.57695	5.82464	6.26823	5.568	5.6345	5.55338
3.29333	7.14475	6.79308	6.8993	6.8866	6.37838	7.02454	6.57565	5.82604	6.26813	5.5679	5.6333	5.55548
3.29667	7.15865	6.79568	6.9017	6.8874	6.38068	7.02654	6.57965	5.82664	6.27463	5.5653	5.6383	5.55608
3.3	7.15585	6.79708	6.9028	6.8823	6.37798	7.02604	6.57775	5.82664	6.27433	5.5646	5.6383	5.55638
3.30333	7.14765	6.79868	6.9038	6.885	6.38048	7.02624	6.58085	5.82714	6.27503	5.5641	5.6389	5.55588
3.30667	7.15265	6.79988	6.9069	6.8826	6.38168	7.02494	6.57885	5.82664	6.27363	5.5652	5.6411	5.55578
3.31	7.15895	6.80308	6.9088	6.8871	6.38058	7.02714	6.57975	5.82524	6.27403	5.5669	5.6451	5.55548
3.31333	7.14965	6.80168	6.909	6.8867	6.38118	7.02704	6.57975	5.82364	6.27053	5.5695	5.6459	5.55468
3.31667	7.15765	6.80168	6.9104	6.8903	6.38268	7.02614	6.58015	5.82584	6.27413	5.5712	5.6451	5.55538
3.32	7.16515	6.80128	6.9124	6.8882	6.38028	7.02654	6.58005	5.82454	6.27733	5.571	5.6493	5.55588
3.32333	7.17085	6.80118	6.9124	6.8882	6.38048	7.02824	6.58485	5.82544	6.27673	5.5693	5.6491	5.55648
3.32667	7.16925	6.80218	6.9118	6.8879	6.38198	7.02894	6.58655	5.82764	6.27743	5.5695	5.6463	5.55798
3.33	7.17395	6.80238	6.9141	6.8891	6.38158	7.02884	6.58295	5.83084	6.27803	5.5708	5.6484	5.55848
3.33333	7.17705	6.80268	6.9144	6.886	6.37988	7.03164	6.58565	5.83214	6.27523	5.5715	5.6492	5.55888
3.33667	7.17795	6.80518	6.9151	6.8862	6.38458	7.03324	6.58375	5.83464	6.27473	5.5736	5.651	5.56158
3.34	7.17055	6.80528	6.915	6.8881	6.38488	7.03394	6.58205	5.83614	6.27863	5.5756	5.6522	5.56278
3.34333	7.16935	6.80608	6.9162	6.8882	6.38408	7.03514	6.58225	5.83634	6.27903	5.577	5.6558	5.56318
3.34667	7.17145	6.80828	6.9181	6.8944	6.38668	7.03544	6.58845	5.83854	6.28003	5.575	5.6535	5.56338
3.35	7.16425	6.80858	6.9181	6.8934	6.39018	7.03454	6.58965	5.83734	6.28463	5.5754	5.6583	5.56348
3.35333	7.16275	6.80758	6.9191	6.8934	6.38998	7.03444	6.59215	5.83594	6.28683	5.5747	5.6582	5.56358
3.35667	7.16855	6.80868	6.9202	6.8932	6.39048	7.03564	6.59115	5.83494	6.28493	5.5778	5.658	5.56588
3.36	7.17145	6.80828	6.9207	6.8928	6.39088	7.03594	6.58985	5.83424	6.28643	5.5774	5.6601	5.56738
3.36333	7.16565	6.80798	6.9199	6.8882	6.39288	7.03784	6.58935	5.83344	6.28773	5.5794	5.6606	5.56838
3.36667	7.16595	6.80838	6.9223	6.8932	6.39308	7.03814	6.58605	5.83584	6.28633	5.5813	5.6593	5.57198
3.37	7.16635	6.80888	6.9231	6.8992	6.39248	7.03904	6.58615	5.83984	6.28523	5.5831	5.6558	5.57348
3.37333	7.16355	6.80818	6.9244	6.9006	6.39278	7.03994	6.58825	5.84194	6.28513	5.5827	5.6557	5.57288
3.37667	7.16745	6.80968	6.9256	6.9031	6.39408	7.03964	6.59125	5.84494	6.28293	5.5841	5.657	5.57298
3.38	7.16875	6.80998	6.9265	6.9039	6.39258	7.04054	6.59015	5.84384	6.28573	5.5854	5.6584	5.57428
3.38333	7.17445	6.81098	6.9274	6.9077	6.39278	7.04294	6.59255	5.84294	6.28683	5.5833	5.6609	5.57408
3.38667	7.17385	6.81308	6.9283	6.9043	6.39318	7.04494	6.59285	5.84094	6.28463	5.5846	5.6655	5.57378
3.39	7.17815	6.81398	6.9307	6.9055	6.39408	7.04444	6.59475	5.83924	6.28773	5.5843	5.6699	5.57368
3.39333	7.17805	6.81398	6.9319	6.9053	6.39268	7.04584	6.59495	5.83764	6.28863	5.5856	5.6681	5.57428
3.39667	7.18445	6.81448	6.9323	6.9113	6.39528	7.04624	6.59885	5.84064	6.29143	5.5871	5.6684	5.57838
3.4	7.18965	6.81548	6.9337	6.9074	6.39638	7.04664	6.59945	5.84084	6.29393	5.5886	5.6681	5.58028
3.40333	7.19425	6.81578	6.9342	6.91	6.39668	7.04664	6.60195	5.84254	6.30003	5.5879	5.6693	5.58068
3.40667	7.19225	6.81628	6.9331	6.9117	6.39718	7.04734	6.60155	5.84514	6.29833	5.5913	5.6681	5.58278
3.41	7.18945	6.81868	6.9344	6.9096	6.39808	7.04674	6.60015	5.84844	6.30113	5.5918	5.6676	5.58178
3.41333	7.18195	6.81988	6.9374	6.9035	6.39768	7.04694	6.59895	5.85074	6.29883	5.5907	5.6711	5.58008
3.41667	7.17845	6.81918	6.9392	6.9082	6.39708	7.04804	6.59955	5.85294	6.29983	5.5901	5.6717	5.57928
3.42	7.18055	6.81768	6.9398	6.9107	6.40048	7.04984	6.59855	5.85214	6.29653	5.5919	5.6702	5.57968
3.42333	7.18635	6.82088	6.941	6.9141	6.40148	7.05044	6.59895	5.85254	6.29983	5.5908	5.6743	5.57728
3.42667	7.18965	6.81948	6.9411	6.9151	6.40158	7.05334	6.60095	5.85274	6.29783	5.5914	5.6733	5.58038
3.43	7.19965	6.81948	6.9411	6.9218	6.40388	7.05274	6.60245	5.85074	6.29753	5.5916	5.674	5.57988
3.43333	7.20145	6.81858	6.9393	6.918	6.40388	7.05214	6.60355	5.85234	6.29503	5.5933	5.6705	5.58028
3.43667	7.20005	6.82078	6.9394	6.9141	6.40208	7.05044	6.60365	5.85634	6.29753	5.5927	5.6738	5.58168
3.44	7.19455	6.82018	6.9419	6.9128	6.40178	7.05224	6.60535	5.85874	6.29813	5.5915	5.6732	5.58418
3.44333	7.19545	6.82148	6.9424	6.915	6.40588	7.05254	6.60575	5.85924	6.30063	5.5929	5.6786	5.58388
3.44667	7.19225	6.82308	6.9433	6.9172	6.40478	7.05364	6.60405	5.86014	6.30173	5.5951	5.6773	5.58428
3.45	7.18625	6.82488	6.9448	6.9207	6.40778	7.05404	6.60555	5.85744	6.30473	5.5965	5.6824	5.58398
3.45333	7.18215	6.82368	6.9467	6.9232	6.40918	7.05534	6.60665	5.85654	6.30413	5.5963	5.684	5.58388
3.45667	7.18595	6.82398	6.9458	6.9233	6.40998	7.05684	6.60735	5.85594	6.30073	5.5971	5.6851	5.58328
3.46	7.18295	6.82338	6.9473	6.9247	6.40898	7.05614	6.60885	5.85734	6.30073	5.5962	5.6827	5.58278
3.46333	7.18375	6.82538	6.9472	6.9236	6.40878	7.05744	6.61085	5.85824	6.30393	5.5981	5.687	5.58478
3.46667	7.18805	6.82638	6.9486	6.9191	6.40938	7.05824	6.61225	5.85994	6.30073	5.5979	5.6883	5.58478
3.47	7.19005	6.82928	6.9497	6.9223	6.40998	7.05884	6.61395	5.86024	6.30063	5.5989	5.6883	5.58588
3.47333	7.19065	6.82978	6.9513	6.9272	6.41108	7.05794	6.61595	5.86164	6.30383	5.5986	5.6887	5.58678
3.47667	7.19365	6.83128	6.9517	6.9274	6.40998	7.05894	6.61775	5.86214	6.30363	5.5996	5.6911	5.59038
3.48	7.19105	6.82978	6.9531	6.9276	6.41078	7.05974	6.61825	5.86184	6.30053	5.5996	5.6901	5.59088
3.48333	7.19215	6.82928	6.9532	6.9296	6.41108	7.06204	6.61885	5.86544	6.30013	5.6012	5.6862	5.59188
3.48667	7.19875	6.82778	6.9541	6.9248	6.41098	7.06284	6.61555	5.86764	6.30203	5.6011	5.6846	5.59508
3.49	7.20035	6.82728	6.9544	6.9193	6.41228	7.06324	6.61465	5.87094	6.30323	5.6043	5.6858	5.59718
3.49333	7.20045	6.82738	6.9563	6.9226	6.41198	7.06334	6.61345	5.87244	6.30553	5.6041	5.6853	5.59618
3.49667	7.20395	6.82908	6.9587	6.9243	6.41228	7.06414	6.61465	5.87574	6.30893	5.605	5.6877	5.59588
3.5	7.20595	6.82998	6.9618	6.9264	6.40878	7.06234	6.61345	5.87504	6.31543	5.6055	5.6913	5.59848
3.50333	7.19975	6.83208	6.9615	6.9307	6.40958	7.06324	6.61705	5.87634	6.31633	5.607	5.6941	5.59718
3.50667	7.19795	6.83278	6.963	6.9332	6.40908	7.06494	6.61565	5.87204	6.31803	5.608	5.6946	5.59778
3.51	7.19715	6.83528	6.9631	6.9367	6.41178	7.06574	6.61605	5.87184	6.31883	5.6084	5.6937	5.59678
3.51333	7.19915	6.83438	6.9622	6.9343	6.41358	7.06484	6.61575	5.87064	6.31743	5.6086	5.6945	5.59998
3.51667	7.20195	6.83628	6.9597	6.9291	6.41978	7.06884	6.61795	5.86954	6.31503	5.6094	5.6949	5.60148
3.52	7.20455	6.83868	6.9612	6.9226	6.42068	7.06874	6.61695	5.86924	6.31623	5.6091	5.696	5.60368
3.52333	7.20345	6.84088	6.9606	6.9231	6.41798	7.06854	6.61895	5.87434	6.31533	5.609	5.6945	5.60438
3.52667	7.20345	6.84048	6.9611	6.9213	6.41838	7.06914	6.61985	5.87384	6.31723	5.6092	5.6988	5.60498
3.53	7.19865	6.84318	6.9627	6.9216	6.41938	7.07154	6.62115	5.87504	6.31953	5.6105	5.6991	5.60468
3.53333	7.19615	6.84408	6.9663	6.9281	6.41908	7.06994	6.61995	5.87724	6.31973	5.6101	5.6994	5.60158
3.53667	7.19855	6.84148	6.968	6.9351	6.41858	7.07064	6.62375	5.87714	6.31973	5.6125	5.7015	5.59908
3.54	7.20425	6.84278	6.9689	6.9352	6.42088	7.06964	6.62435	5.87444	6.32123	5.6136	5.7046	5.60148
3.54333	7.20875	6.84338	6.9696	6.935	6.41988	7.07084	6.62475	5.87444	6.31993	5.6149	5.7057	5.60508
3.54667	7.21575	6.84428	6.9694	6.9383	6.41618	7.07104	6.62795	5.87564	6.31853	5.6137	5.7029	5.60628
3.55	7.21855	6.84318	6.9689	6.9407	6.41448	7.07154	6.62845	5.87644	6.32023	5.6134	5.7054	5.60878
3.55333	7.22025	6.84408	6.9682	6.9422	6.41748	7.07324	6.62775	5.87454	6.32063	5.6135	5.7037	5.60998
3.55667	7.22115	6.84198	6.9702	6.9438	6.41968	7.07504	6.62955	5.87774	6.32053	5.6143	5.705	5.60908
3.56	7.21885	6.84138	6.9705	6.9447	6.42248	7.07484	6.62885	5.87634	6.31933	5.6143	5.7063	5.60798
3.56333	7.21585	6.83918	6.9732	6.946	6.42218	7.07414	6.62625	5.87744	6.32163	5.6141	5.7068	5.60798
3.56667	7.21405	6.84258	6.9736	6.9457	6.42368	7.07534	6.62955	5.87684	6.31793	5.6174	5.7095	5.61028
3.57	7.21495	6.84428	6.9752	6.9397	6.42128	7.07534	6.62995	5.87964	6.31643	5.6183	5.714	5.61178
3.57333	7.21635	6.84668	6.9756	6.9341	6.42168	7.07564	6.62945	5.87984	6.31553	5.618	5.711	5.61178
3.57667	7.22065	6.84878	6.9767	6.941	6.42008	7.07794	6.63335	5.88404	6.32043	5.6198	5.7104	5.61238
3.58	7.22395	6.84988	6.9766	6.9413	6.42378	7.07934	6.63595	5.88384	6.32183	5.6224	5.7138	5.61238
3.58333	7.22635	6.84818	6.9777	6.9367	6.42228	7.07984	6.63465	5.88634	6.32493	5.6216	5.7132	5.61158
3.58667	7.22785	6.84718	6.978	6.9441	6.42278	7.07884	6.63375	5.88634	6.32793	5.6222	5.7103	5.61078
3.59	7.22575	6.84638	6.9789	6.9494	6.42308	7.07994	6.63645	5.88744	6.33023	5.6225	5.7152	5.61078
3.59333	7.22435	6.84628	6.9793	6.9416	6.42378	7.07854	6.63565	5.89044	6.32863	5.6231	5.7159	5.61368
3.59667	7.22525	6.84758	6.9794	6.9404	6.42668	7.07984	6.63565	5.89034	6.32743	5.6251	5.7167	5.61418
3.6	7.22685	6.84528	6.9788	6.9465	6.42888	7.07984	6.63445	5.88894	6.32963	5.6273	5.7178	5.61368
3.60333	7.22465	6.84688	6.979	6.9467	6.43048	7.08234	6.63695	5.89264	6.32963	5.6264	5.7186	5.61638
3.60667	7.22795	6.84778	6.9797	6.9499	6.43088	7.08204	6.63525	5.89214	6.33133	5.6271	5.7181	5.61888
3.61	7.22945	6.84738	6.9816	6.9539	6.43228	7.08214	6.63675	5.89264	6.33343	5.6281	5.7184	5.61818
3.61333	7.22615	6.84928	6.9825	6.9548	6.43258	7.08314	6.63655	5.89414	6.33283	5.6274	5.7195	5.61828
3.61667	7.22445	6.85118	6.9832	6.9485	6.43218	7.08234	6.63675	5.89824	6.32993	5.625	5.7172	5.61938
3.62	7.22245	6.85158	6.9852	6.9485	6.43498	7.08144	6.63745	5.89684	6.32843	5.6277	5.7201	5.61818
3.62333	7.22395	6.85228	6.9856	6.9515	6.43228	7.08404	6.64015	5.89894	6.32623	5.6279	5.7213	5.61738
3.62667	7.22525	6.85248	6.9843	6.946	6.43408	7.08554	6.63935	5.89834	6.32553	5.6277	5.7229	5.61718
3.63	7.22965	6.85068	6.9837	6.9452	6.43108	7.08474	6.64015	5.89804	6.32873	5.626	5.7232	5.61868
3.63333	7.23175	6.85288	6.9847	6.95	6.43468	7.08494	6.64255	5.89604	6.33093	5.6297	5.7254	5.62088
3.63667	7.23325	6.85368	6.9858	6.9487	6.43278	7.08634	6.64325	5.89674	6.33533	5.6307	5.7258	5.62278
3.64	7.23025	6.85548	6.9864	6.9447	6.43168	7.08564	6.64215	5.89484	6.33733	5.6319	5.7248	5.62198
3.64333	7.23245	6.85558	6.9888	6.9468	6.42808	7.08664	6.64175	5.89504	6.33893	5.6324	5.7267	5.62268
3.64667	7.23185	6.85568	6.9909	6.9486	6.42978	7.08804	6.64265	5.89484	6.33723	5.6346	5.726	5.62288
3.65	7.22935	6.85498	6.9929	6.9496	6.42798	7.09014	6.64415	5.89714	6.33693	5.6335	5.7255	5.62218
3.65333	7.23385	6.85528	6.9934	6.9525	6.42898	7.09004	6.64345	5.89874	6.33733	5.6339	5.7238	5.62208
3.65667	7.23515	6.85348	6.9941	6.9539	6.43398	7.08964	6.64645	5.89884	6.33933	5.6363	5.729	5.62408
3.66	7.23315	6.85448	6.9951	6.9528	6.43528	7.08974	6.64675	5.89934	6.33893	5.6387	5.7281	5.62468
3.66333	7.23405	6.85668	6.9954	6.9571	6.43598	7.08964	6.64705	5.90004	6.33693	5.6391	5.731	5.62718
3.66667	7.23395	6.85828	6.9961	6.9637	6.43438	7.09054	6.64695	5.89944	6.33713	5.6397	5.7303	5.62718
3.67	7.22865	6.85848	6.996	6.9647	6.43478	7.09164	6.64755	5.89854	6.33683	5.6372	5.7344	5.62618
3.67333	7.22635	6.86038	6.9976	6.9674	6.43478	7.09164	6.64445	5.90084	6.33563	5.637	5.731	5.62708
3.67667	7.22235	6.86168	6.9992	6.9677	6.43528	7.09364	6.64615	5.89984	6.33613	5.6366	5.7319	5.62908
3.68	7.22275	6.86158	7.0007	6.9659	6.43668	7.09554	6.64475	5.90064	6.34533	5.6378	5.7302	5.62788
3.68333	7.22435	6.86248	7.0014	6.9607	6.43498	7.09584	6.64325	5.90104	6.35053	5.6391	5.7357	5.62818
3.68667	7.22625	6.86178	7.0015	6.9561	6.43078	7.09604	6.64625	5.90154	6.35213	5.641	5.7348	5.62958
3.69	7.22895	6.86098	7.0015	6.9522	6.43108	7.09704	6.64775	5.90224	6.35343	5.6402	5.7363	5.62898
3.69333	7.23315	6.85968	7.0006	6.956	6.43548	7.09534	6.64935	5.90294	6.35383	5.6403	5.7376	5.62858
3.69667	7.23655	6.85938	7.0015	6.956	6.43738	7.09294	6.65005	5.90634	6.34723	5.6403	5.7389	5.63088
3.7	7.24125	6.85948	7.0006	6.9563	6.44088	7.09424	6.65345	5.90714	6.34713	5.6396	5.7382	5.63298
3.70333	7.24295	6.86128	7.0019	6.9609	6.44548	7.09524	6.65055	5.90924	6.34763	5.6397	5.7378	5.63338
3.70667	7.24675	6.86268	7.0016	6.9622	6.44518	7.09654	6.65025	5.90824	6.34843	5.6413	5.7398	5.63548
3.71	7.24845	6.86298	7.0029	6.962	6.44228	7.09784	6.64955	5.91154	6.34543	5.6429	5.7406	5.63618
3.71333	7.24505	6.86548	7.0037	6.9565	6.44108	7.10214	6.65325	5.90944	6.35193	5.6418	5.7426	5.63578
3.71667	7.24365	6.86378	7.006	6.9552	6.44068	7.10074	6.65065	5.90824	6.34753	5.6417	5.7457	5.63358
3.72	7.24675	6.86328	7.0055	6.9529	6.43868	7.10064	6.65025	5.90954	6.34753	5.6439	5.7482	5.63408
3.72333	7.24215	6.86638	7.0061	6.9523	6.43898	7.10104	6.64925	5.91314	6.34573	5.6435	5.7483	5.63288
3.72667	7.23895	6.86708	7.0049	6.9521	6.43858	7.10034	6.65135	5.91414	6.34913	5.6418	5.7463	5.63148
3.73	7.24055	6.86708	7.0059	6.9525	6.43828	7.09874	6.64965	5.91464	6.34693	5.6428	5.7476	5.63158
3.73333	7.23945	6.87188	7.0047	6.9489	6.43948	7.10084	6.65075	5.91664	6.35203	5.6432	5.747	5.63538
3.73667	7.23985	6.87328	7.0049	6.9525	6.44088	7.10144	6.65315	5.91654	6.35073	5.644	5.7466	5.63808
3.74	7.24225	6.87188	7.0057	6.9552	6.43738	7.10144	6.65635	5.91434	6.34973	5.6454	5.7426	5.63818
3.74333	7.24575	6.87158	7.0084	6.9605	6.43528	7.10284	6.65235	5.91224	6.35083	5.647	5.7437	5.63998
3.74667	7.25205	6.87188	7.0092	6.9635	6.43308	7.10394	6.65265	5.91364	6.34873	5.647	5.7443	5.64038
3.75	7.25255	6.87088	7.0104	6.9694	6.43288	7.10444	6.65585	5.91464	6.34983	5.6489	5.7453	5.63908
3.75333	7.25385	6.87268	7.0108	6.9618	6.43508	7.10544	6.65575	5.91404	6.35053	5.6486	5.7466	5.63858
3.75667	7.25765	6.87358	7.0123	6.958	6.44068	7.10614	6.65325	5.91614	6.35483	5.6494	5.7485	5.63988
3.76	7.26055	6.87638	7.0116	6.9556	6.44368	7.10664	6.65535	5.91854	6.35513	5.6497	5.7523	5.64108
3.76333	7.25725	6.87688	7.0108	6.9546	6.44648	7.10744	6.65755	5.91834	6.36083	5.6512	5.7521	5.64048
3.76667	7.26075	6.87408	7.0117	6.9486	6.44948	7.10744	6.65355	5.91954	6.36093	5.6501	5.752	5.64398
3.77	7.26055	6.87498	7.0135	6.9584	6.44838	7.10784	6.65465	5.91834	6.36353	5.6503	5.752	5.64498
3.77333	7.25715	6.87218	7.012	6.9601	6.44488	7.10864	6.65845	5.91804	6.36483	5.6483	5.7554	5.64598
3.77667	7.25485	6.87178	7.0129	6.9594	6.44518	7.10874	6.66145	5.91854	6.36893	5.6496	5.7527	5.64598
3.78	7.25595	6.87078	7.0141	6.9643	6.44708	7.10744	6.66105	5.92014	6.36733	5.6504	5.7537	5.65058
3.78333	7.25115	6.87228	7.0166	6.975	6.44098	7.10654	6.66565	5.92074	6.36973	5.6522	5.7518	5.64848
3.78667	7.25435	6.87038	7.0168	6.9723	6.44248	7.10654	6.66715	5.92154	6.37013	5.6517	5.7527	5.64798
3.79	7.26065	6.87418	7.0184	6.9761	6.44558	7.10774	6.66785	5.92254	6.37303	5.6531	5.7533	5.64928
3.79333	7.26405	6.87438	7.0188	6.9766	6.44388	7.10804	6.66725	5.92154	6.37103	5.653	5.7558	5.65008
3.79667	7.26305	6.87748	7.0191	6.9727	6.44358	7.10944	6.66885	5.92274	6.37143	5.6541	5.7558	5.64688
3.8	7.26835	6.88038	7.0188	6.9744	6.45098	7.11234	6.66935	5.92264	6.36613	5.654	5.7558	5.64948
3.80333	7.26675	6.88238	7.0192	6.9764	6.45248	7.11254	6.67055	5.92464	6.36293	5.6549	5.7576	5.64908
3.80667	7.26285	6.88148	7.021	6.9727	6.44858	7.11234	6.66875	5.92494	6.35803	5.6572	5.7591	5.64878
3.81	7.26125	6.88188	7.0215	6.9771	6.45298	7.11494	6.66955	5.92634	6.35853	5.6569	5.759	5.64798
3.81333	7.26085	6.88048	7.022	6.9765	6.45188	7.11564	6.67065	5.92664	6.35973	5.657	5.7598	5.64928
3.81667	7.26125	6.88098	7.0221	6.9714	6.44798	7.11504	6.67015	5.92944	6.36573	5.6591	5.7627	5.64698
3.82	7.25875	6.87918	7.0232	6.9719	6.44788	7.11604	6.66765	5.92924	6.37073	5.6585	5.7645	5.64998
3.82333	7.26265	6.87868	7.0227	6.974	6.45098	7.11734	6.66895	5.93014	6.37333	5.657	5.7641	5.65128
3.82667	7.26385	6.88058	7.0233	6.9702	6.44848	7.11564	6.66825	5.93034	6.37443	5.6593	5.7675	5.65308
3.83	7.26235	6.87968	7.0233	6.9758	6.44908	7.11464	6.66655	5.92804	6.37503	5.6601	5.7674	5.65358
3.83333	7.26245	6.87808	7.0237	6.9794	6.45338	7.11454	6.66635	5.92774	6.37513	5.6604	5.7676	5.65728
3.83667	7.26305	6.87908	7.0239	6.9792	6.44688	7.11524	6.66865	5.92834	6.37453	5.6612	5.7669	5.65678
3.84	7.25845	6.88168	7.0243	6.978	6.45158	7.11464	6.66955	5.92724	6.37413	5.6601	5.768	5.65788
3.84333	7.25715	6.88178	7.0264	6.9801	6.45678	7.11494	6.67285	5.92924	6.37423	5.6599	5.7639	5.65868
3.84667	7.26125	6.88378	7.0285	6.9809	6.45418	7.11654	6.67235	5.93114	6.37373	5.6599	5.7669	5.65948
3.85	7.26515	6.88448	7.0276	6.9828	6.45128	7.11744	6.67395	5.93104	6.37153	5.6595	5.7672	5.66148
3.85333	7.26495	6.88448	7.0285	6.9825	6.45588	7.11824	6.67465	5.93274	6.37193	5.6612	5.7688	5.66178
3.85667	7.26675	6.88528	7.0295	6.9825	6.45418	7.11854	6.67625	5.93484	6.37343	5.6632	5.7665	5.66238
3.86	7.26355	6.88398	7.0289	6.9832	6.45048	7.11994	6.67315	5.93264	6.37503	5.6625	5.7711	5.66298
3.86333	7.25965	6.88288	7.0278	6.9835	6.45428	7.12114	6.67445	5.93304	6.38053	5.6649	5.7707	5.66468
3.86667	7.25385	6.88338	7.0303	6.976	6.45448	7.12164	6.67545	5.93454	6.38163	5.6683	5.7722	5.66388
3.87	7.25635	6.88558	7.0314	6.9791	6.45518	7.12144	6.67485	5.93624	6.38233	5.6686	5.7728	5.66598
3.87333	7.25565	6.88548	7.033	6.9857	6.45328	7.12404	6.67275	5.93824	6.38423	5.6685	5.7739	5.66488
3.87667	7.26075	6.88588	7.0339	6.9864	6.45478	7.12424	6.67445	5.94094	6.38513	5.6699	5.7739	5.66568
3.88	7.26315	6.88858	7.0339	6.9865	6.45368	7.12414	6.67345	5.94354	6.37973	5.6701	5.7702	5.66468
3.88333	7.26575	6.89108	7.035	6.9867	6.45498	7.12604	6.67185	5.94194	6.37843	5.6686	5.773	5.66558
3.88667	7.26765	6.89118	7.0363	6.9804	6.45598	7.12764	6.67145	5.94264	6.37723	5.6693	5.7711	5.66478
3.89	7.26805	6.89078	7.037	6.9787	6.45958	7.12664	6.67345	5.94164	6.37453	5.6709	5.7759	5.66528
3.89333	7.26345	6.89378	7.037	6.9745	6.45828	7.12624	6.67385	5.94264	6.37393	5.6714	5.7741	5.66448
3.89667	7.26325	6.89298	7.0392	6.9675	6.45938	7.12694	6.67705	5.93994	6.37573	5.6696	5.7801	5.66668
3.9	7.26895	6.89248	7.0383	6.9744	6.45908	7.12574	6.68065	5.93924	6.37763	5.6697	5.7763	5.66658
3.90333	7.26885	6.89258	7.0379	6.9805	6.45848	7.12544	6.68365	5.93804	6.38203	5.6689	5.7788	5.66698
3.90667	7.27425	6.89158	7.0366	6.9768	6.45768	7.12504	6.68405	5.93724	6.38383	5.6703	5.7785	5.66768
3.91	7.27895	6.89048	7.0385	6.9815	6.46008	7.12614	6.68435	5.93794	6.38583	5.6716	5.7807	5.66868
3.91333	7.28095	6.89098	7.0385	6.9869	6.46008	7.12594	6.68155	5.94264	6.38703	5.6738	5.7797	5.66888
3.91667	7.27545	6.89068	7.0385	6.9875	6.45938	7.12754	6.68245	5.94494	6.38383	5.6741	5.7813	5.66728
3.92	7.27385	6.89038	7.0384	6.9876	6.45998	7.12644	6.68135	5.94504	6.38023	5.6747	5.781	5.66778
3.92333	7.27235	6.89208	7.0391	6.9927	6.46068	7.12884	6.68255	5.94854	6.37973	5.6736	5.7813	5.66838
3.92667	7.26975	6.89328	7.0377	6.9863	6.45938	7.12874	6.68015	5.94804	6.37533	5.6712	5.7836	5.66998
3.93	7.26825	6.89338	7.0386	6.9881	6.46048	7.12914	6.68505	5.94844	6.37463	5.671	5.7853	5.67078
3.93333	7.27255	6.89268	7.0402	6.985	6.46498	7.12964	6.68315	5.94894	6.37753	5.6716	5.7857	5.67298
3.93667	7.27505	6.89428	7.0396	6.9857	6.46448	7.13144	6.68495	5.95024	6.37983	5.6729	5.7886	5.67338
3.94	7.27375	6.89368	7.0401	6.9886	6.46368	7.13094	6.68125	5.94904	6.38283	5.6742	5.7879	5.67478
3.94333	7.27615	6.89308	7.0409	6.9929	6.46668	7.13214	6.68595	5.94864	6.38663	5.6761	5.7867	5.67518
3.94667	7.27925	6.89268	7.0416	6.995	6.46518	7.13254	6.68465	5.94774	6.38763	5.6797	5.7849	5.67408
3.95	7.27595	6.89488	7.04	7.0005	6.46258	7.13184	6.68415	5.94754	6.38793	5.6811	5.7863	5.67398
3.95333	7.28015	6.89508	7.0429	6.9974	6.46448	7.13244	6.68285	5.94824	6.38423	5.6826	5.7833	5.67318
3.95667	7.28045	6.89708	7.0443	6.9941	6.46518	7.13404	6.68695	5.94924	6.38373	5.6832	5.7853	5.67308
3.96	7.28515	6.89768	7.046	6.9983	6.45928	7.13364	6.68705	5.94934	6.38353	5.6819	5.7858	5.67248
3.96333	7.28535	6.89878	7.046	6.993	6.45988	7.13464	6.68725	5.94954	6.38493	5.6805	5.7875	5.67368
3.96667	7.28635	6.89828	7.048	6.9872	6.45988	7.13564	6.68605	5.94794	6.38633	5.6798	5.7879	5.67478
3.97	7.28205	6.89678	7.0476	6.9871	6.45678	7.13684	6.68525	5.94744	6.38793	5.68	5.7918	5.67828
3.97333	7.28255	6.89418	7.0495	6.9846	6.45828	7.13504	6.68485	5.94834	6.38703	5.6807	5.7916	5.68028
3.97667	7.27825	6.89448	7.049	6.9814	6.46398	7.13634	6.68455	5.94884	6.38943	5.685	5.7912	5.67928
3.98	7.28085	6.89598	7.0496	6.982	6.46508	7.13624	6.68495	5.95094	6.38873	5.6842	5.7928	5.67928
3.98333	7.28335	6.89508	7.0499	6.9785	6.46748	7.13724	6.68715	5.95404	6.39073	5.6844	5.7929	5.68058
3.98667	7.28525	6.89718	7.0512	6.9813	6.47208	7.13644	6.68755	5.95534	6.39313	5.684	5.7925	5.67958
3.99	7.28615	6.89908	7.0495	6.9878	6.47098	7.13784	6.68955	5.95594	6.39513	5.6821	5.7884	5.67928
3.99333	7.29095	6.89688	7.0492	6.9894	6.47088	7.13834	6.69035	5.95834	6.39313	5.6822	5.7888	5.68068
3.99667	7.28755	6.89638	7.0491	6.9896	6.46948	7.13954	6.69185	5.95804	6.39343	5.6822	5.7871	5.68218
4	7.28985	6.89718	7.0515	6.9943	6.46908	7.13854	6.69145	5.95824	6.39313	5.6824	5.7869	5.68038
4.00333	7.29155	6.89808	7.051	6.9933	6.46968	7.13914	6.69435	5.95734	6.39333	5.6816	5.7884	5.68418
4.00667	7.29185	6.89668	7.0526	6.9919	6.47018	7.13854	6.69235	5.95664	6.39053	5.6844	5.7942	5.68208
4.01	7.28445	6.90008	7.0521	6.9888	6.47058	7.13824	6.69375	5.95394	6.38903	5.6813	5.7977	5.68598
4.01333	7.28325	6.90048	7.0538	6.99	6.47438	7.13874	6.69275	5.95144	6.38853	5.6835	5.799	5.68478
4.01667	7.28805	6.90058	7.0532	6.9912	6.47578	7.14034	6.69265	5.94994	6.39133	5.6832	5.8014	5.68648
4.02	7.28205	6.90108	7.0539	6.9873	6.47508	7.14154	6.69385	5.95034	6.39293	5.687	5.8006	5.68408
4.02333	7.28285	6.90438	7.0532	6.986	6.47598	7.14274	6.69655	5.95254	6.39563	5.6868	5.7994	5.68758
4.02667	7.28575	6.90428	7.0559	6.9876	6.47578	7.14254	6.69385	5.95654	6.39823	5.6883	5.8001	5.68378
4.03	7.28725	6.90448	7.0552	6.9891	6.47518	7.14184	6.69335	5.95964	6.39833	5.6893	5.8003	5.68548
4.03333	7.28125	6.90658	7.0553	6.9947	6.47408	7.14384	6.69365	5.96264	6.39923	5.6906	5.7983	5.68758
4.03667	7.28035	6.90538	7.0551	7.0034	6.47228	7.14454	6.69445	5.96514	6.39883	5.6894	5.8008	5.68828
4.04	7.28165	6.90548	7.057	7.0039	6.47288	7.14504	6.69215	5.96444	6.39573	5.6904	5.8019	5.68738
4.04333	7.28175	6.90558	7.0563	7.0089	6.47288	7.14524	6.69605	5.96474	6.39593	5.6916	5.8005	5.68938
4.04667	7.28455	6.90638	7.0576	7.0114	6.47188	7.14654	6.69715	5.96454	6.39913	5.691	5.8019	5.69088
4.05	7.28305	6.90808	7.0593	7.0139	6.47308	7.14584	6.69795	5.96534	6.39823	5.6909	5.8031	5.69238
4.05333	7.29135	6.90978	7.0591	7.0093	6.47468	7.14494	6.69615	5.96444	6.39803	5.6888	5.8024	5.69298
4.05667	7.29025	6.91068	7.0574	7.011	6.47448	7.14494	6.69765	5.96554	6.39983	5.6882	5.8022	5.69458
4.06	7.29255	6.91068	7.0585	7.0109	6.47348	7.14584	6.69505	5.96354	6.39773	5.6892	5.8057	5.69708
4.06333	7.29185	6.90968	7.058	7.0111	6.47518	7.14474	6.69735	5.96234	6.39533	5.6887	5.8065	5.69798
4.06667	7.29415	6.90738	7.0572	7.0036	6.47448	7.14494	6.70055	5.96174	6.39373	5.6899	5.8097	5.69418
4.07	7.29165	6.90718	7.0594	6.9977	6.47438	7.14614	6.70135	5.96224	6.39653	5.6908	5.809	5.69328
4.07333	7.29805	6.90538	7.0606	6.9941	6.47278	7.14594	6.70075	5.96314	6.40023	5.6926	5.8113	5.69348
4.07667	7.29865	6.90688	7.0596	6.9973	6.47468	7.14774	6.70155	5.96454	6.40483	5.6929	5.8093	5.69178
4.08	7.29445	6.90708	7.0605	6.9982	6.47358	7.14994	6.69985	5.96534	6.40763	5.6928	5.8071	5.69368
4.08333	7.29785	6.90998	7.0621	6.9987	6.47798	7.14854	6.70245	5.96584	6.40733	5.6935	5.8069	5.69498
4.08667	7.30205	6.90978	7.0628	7.006	6.47488	7.14884	6.69915	5.96784	6.40233	5.6958	5.8086	5.69668
4.09	7.29855	6.91178	7.062	7.007	6.48218	7.14994	6.70235	5.96624	6.40073	5.6945	5.8099	5.69708
4.09333	7.29935	6.90878	7.0647	7.0017	6.47588	7.15034	6.70435	5.96654	6.40003	5.6948	5.8116	5.69798
4.09667	7.30445	6.91058	7.0658	6.9978	6.48298	7.15064	6.70385	5.96804	6.40043	5.6966	5.8153	5.69428
4.1	7.29925	6.90948	7.0643	6.996	6.47708	7.15314	6.70095	5.96884	6.40473	5.697	5.815	5.69708
4.10333	7.29535	6.91038	7.0653	7.0016	6.48318	7.15314	6.70335	5.96654	6.41113	5.6981	5.8155	5.69568
4.10667	7.29155	6.90848	7.0673	7.007	6.47688	7.15194	6.70285	5.96684	6.41223	5.6975	5.8142	5.69508
4.11	7.29275	6.91108	7.0662	7.007	6.48628	7.15104	6.70375	5.96704	6.41293	5.6987	5.8101	5.69378
4.11333	7.29505	6.91048	7.0664	7.0047	6.47788	7.15094	6.70615	5.96774	6.40953	5.6979	5.8114	5.69438
4.11667	7.29735	6.91108	7.0681	7.008	6.47988	7.15074	6.70585	5.96694	6.40623	5.6979	5.8116	5.69288
4.12	7.30355	6.91038	7.0678	7.0024	6.47868	7.15104	6.70535	5.96934	6.40253	5.6961	5.8134	5.69338
4.12333	7.30795	6.91158	7.0683	7.0029	6.47838	7.15204	6.70465	5.96934	6.40223	5.6981	5.8146	5.69358
4.12667	7.30875	6.91188	7.068	7.0081	6.47558	7.15254	6.70365	5.97054	6.40433	5.6971	5.818	5.69558
4.13	7.30585	6.91328	7.0661	7.0107	6.47878	7.15164	6.70435	5.97204	6.40793	5.6986	5.8156	5.69768
4.13333	7.30895	6.91438	7.0671	7.0061	6.48018	7.15164	6.70435	5.97134	6.40933	5.701	5.8177	5.69868
4.13667	7.29845	6.91408	7.067	7.0123	6.47958	7.15194	6.70715	5.97414	6.41103	5.7034	5.8153	5.69828
4.14	7.29595	6.91368	7.0679	7.01	6.48098	7.15244	6.70515	5.97564	6.41093	5.7041	5.8159	5.69968
4.14333	7.30065	6.91428	7.0698	7.0062	6.48038	7.15314	6.70475	5.97514	6.41033	5.7047	5.8167	5.70178
4.14667	7.30285	6.91408	7.0727	7.011	6.48058	7.15474	6.70455	5.97544	6.41043	5.7057	5.8182	5.70248
4.15	7.29805	6.91418	7.0724	7.021	6.48178	7.15534	6.70685	5.97664	6.41253	5.7053	5.8184	5.70398
4.15333	7.30825	6.91708	7.0723	7.0184	6.48408	7.15514	6.70725	5.97334	6.41543	5.7049	5.819	5.70858
4.15667	7.31045	6.91758	7.0719	7.0187	6.48418	7.15564	6.70845	5.97294	6.41523	5.7046	5.8171	5.70918
4.16	7.30885	6.91768	7.0719	7.0175	6.48628	7.15654	6.70965	5.97424	6.41713	5.7056	5.8182	5.70758
4.16333	7.30775	6.91708	7.0713	7.0204	6.48548	7.15644	6.70955	5.97354	6.41973	5.7031	5.8152	5.70728
4.16667	7.31205	6.91748	7.0714	7.0136	6.48248	7.15674	6.71035	5.97494	6.41873	5.7022	5.8183	5.70848
4.17	7.30945	6.91658	7.0723	7.0153	6.48258	7.15894	6.71185	5.97654	6.42043	5.7029	5.8187	5.70718
4.17333	7.31115	6.91648	7.0746	7.0151	6.48338	7.15904	6.71255	5.97884	6.42223	5.7047	5.822	5.70498
4.17667	7.31125	6.91658	7.0742	7.0124	6.48268	7.15874	6.71075	5.97994	6.42093	5.7032	5.8211	5.70638
4.18	7.31145	6.91548	7.0756	7.0081	6.48248	7.15954	6.71095	5.98024	6.42053	5.7052	5.8248	5.70638
4.18333	7.31335	6.91478	7.0759	7.013	6.48218	7.15994	6.71195	5.98184	6.41793	5.706	5.8232	5.70578
4.18667	7.31295	6.91448	7.074	7.014	6.48278	7.15784	6.71145	5.98284	6.41563	5.7066	5.8258	5.70458
4.19	7.31195	6.91648	7.0728	7.0157	6.48218	7.15864	6.71415	5.98324	6.41713	5.7058	5.8267	5.70808
4.19333	7.31205	6.91708	7.0749	7.0182	6.48468	7.15874	6.71595	5.98404	6.41523	5.7058	5.8254	5.70638
4.19667	7.31385	6.91948	7.0756	7.0216	6.48658	7.15884	6.71585	5.98524	6.41493	5.7071	5.825	5.70708
4.2	7.31295	6.91998	7.0765	7.0195	6.49558	7.15934	6.71535	5.98524	6.41743	5.708	5.8247	5.70638
4.20333	7.31675	6.92188	7.078	7.0171	6.49338	7.16164	6.71685	5.98554	6.41903	5.7077	5.8245	5.70758
4.20667	7.31855	6.91988	7.0783	7.0136	6.49208	7.16184	6.71515	5.98564	6.41723	5.7081	5.8226	5.70878
4.21	7.31405	6.92118	7.079	7.0204	6.49478	7.16184	6.71655	5.98644	6.41683	5.7111	5.8277	5.71068
4.21333	7.31515	6.91988	7.0792	7.0157	6.49368	7.16234	6.71745	5.98584	6.41793	5.7095	5.8289	5.71048
4.21667	7.31205	6.91798	7.0792	7.0199	6.48578	7.16184	6.71575	5.98574	6.41703	5.711	5.8292	5.71198
4.22	7.30835	6.91548	7.0807	7.0203	6.48548	7.16254	6.71385	5.98664	6.41603	5.712	5.8302	5.71208
4.22333	7.31005	6.91758	7.0829	7.0233	6.48558	7.16344	6.71695	5.98684	6.41713	5.7129	5.8318	5.71048
4.22667	7.31545	6.91708	7.0827	7.0196	6.48148	7.16324	6.71625	5.98524	6.42093	5.7126	5.8306	5.70918
4.23	7.31605	6.91858	7.0824	7.0239	6.48108	7.16344	6.71845	5.98444	6.42243	5.7126	5.8294	5.71088
4.23333	7.31965	6.91998	7.0826	7.0245	6.48518	7.16434	6.71865	5.98524	6.42373	5.7106	5.8315	5.71118
4.23667	7.31945	6.92208	7.0828	7.0203	6.48668	7.16324	6.72065	5.98334	6.42683	5.7099	5.8298	5.71258
4.24	7.31745	6.92338	7.0811	7.015	6.49038	7.16314	6.71775	5.98284	6.42733	5.7093	5.8316	5.71398
4.24333	7.31695	6.92208	7.0812	7.0165	6.49088	7.16394	6.71905	5.98354	6.42923	5.7087	5.8314	5.71518
4.24667	7.31715	6.92258	7.0824	7.0144	6.49108	7.16394	6.71865	5.98414	6.42713	5.7112	5.8339	5.71628
4.25	7.31655	6.92468	7.0851	7.0152	6.48938	7.16374	6.71755	5.98394	6.42803	5.7113	5.8334	5.71558
4.25333	7.31645	6.92288	7.0848	7.0172	6.48918	7.16344	6.71685	5.98404	6.42563	5.7127	5.835	5.71798
4.25667	7.31635	6.92268	7.0857	7.0256	6.49058	7.16384	6.71765	5.98294	6.42843	5.7146	5.8342	5.71788
4.26	7.31045	6.92448	7.0865	7.024	6.49008	7.16484	6.71885	5.98284	6.42733	5.7161	5.8327	5.71948
4.26333	7.30755	6.92558	7.086	7.0252	6.49168	7.16664	6.71745	5.98804	6.43213	5.7139	5.8344	5.71998
4.26667	7.30885	6.92548	7.0859	7.0252	6.49408	7.16764	6.71835	5.98834	6.43473	5.7138	5.8345	5.72338
4.27	7.30815	6.92568	7.0876	7.0305	6.49068	7.16964	6.71835	5.99254	6.43633	5.7135	5.8357	5.72068
4.27333	7.31195	6.92368	7.089	7.0271	6.49138	7.16864	6.71995	5.99624	6.43563	5.7137	5.8336	5.72098
4.27667	7.31835	6.92308	7.0888	7.0259	6.49708	7.16974	6.71815	5.99934	6.43613	5.713	5.8386	5.71878
4.28	7.32185	6.92078	7.0908	7.0223	6.49888	7.16914	6.71725	5.99704	6.43213	5.717	5.8388	5.71758
4.28333	7.32065	6.92258	7.09	7.0241	6.49578	7.16914	6.71815	5.99734	6.42863	5.7178	5.8371	5.71798
4.28667	7.32405	6.92368	7.0904	7.0184	6.50208	7.16824	6.72045	5.99654	6.42643	5.719	5.8356	5.71968
4.29	7.32085	6.92408	7.0913	7.0201	6.49888	7.17124	6.71975	5.99634	6.42453	5.719	5.8386	5.72178
4.29333	7.31885	6.92338	7.0929	7.0217	6.49148	7.17014	6.71925	5.99504	6.42363	5.7202	5.839	5.72538
4.29667	7.32055	6.92368	7.092	7.0252	6.49138	7.17034	6.72215	5.99594	6.42293	5.7178	5.8381	5.72658
4.3	7.31925	6.92198	7.0933	7.0263	6.49068	7.17154	6.72425	5.99604	6.42753	5.7212	5.8392	5.72678
4.30333	7.31915	6.92158	7.0936	7.0329	6.48978	7.17204	6.72485	5.99374	6.42983	5.7209	5.842	5.72698
4.30667	7.31825	6.92298	7.092	7.0311	6.48938	7.17074	6.72405	5.99074	6.43093	5.7212	5.8433	5.72798
4.31	7.31945	6.92298	7.0913	7.0341	6.49318	7.17184	6.72665	5.99144	6.43253	5.722	5.8416	5.72898
4.31333	7.31845	6.92268	7.0925	7.0355	6.49168	7.17244	6.72605	5.99114	6.43613	5.7229	5.8437	5.73018
4.31667	7.32065	6.92218	7.0918	7.0322	6.49308	7.17234	6.72675	5.98894	6.43653	5.7227	5.845	5.72848
4.32	7.31795	6.92368	7.0912	7.0301	6.49438	7.17214	6.72665	5.99194	6.43753	5.7239	5.8452	5.72888
4.32333	7.32125	6.92508	7.0912	7.0292	6.49308	7.17214	6.72945	5.99504	6.44003	5.7235	5.8446	5.72628
4.32667	7.32185	6.92418	7.0906	7.0282	6.49208	7.17144	6.72665	5.99554	6.43843	5.7242	5.8463	5.72608
4.33	7.32065	6.92678	7.0898	7.0275	6.49218	7.17154	6.72705	5.99474	6.43683	5.7247	5.846	5.72458
4.33333	7.31865	6.92768	7.092	7.0208	6.49428	7.17294	6.72505	5.99584	6.43683	5.7243	5.8441	5.72478
4.33667	7.32275	6.92758	7.0928	7.0114	6.49738	7.17454	6.72255	5.99604	6.43213	5.725	5.8473	5.72488
4.34	7.32045	6.92608	7.0937	7.0105	6.50068	7.17504	6.72145	5.99544	6.43273	5.7261	5.8482	5.72598
4.34333	7.32115	6.92848	7.0951	7.014	6.49758	7.17604	6.72355	5.99774	6.43503	5.7245	5.8468	5.72438
4.34667	7.32105	6.92658	7.0957	7.0103	6.49748	7.17574	6.72725	6.00104	6.43533	5.7254	5.8441	5.72568
4.35	7.32515	6.92608	7.0953	7.0159	6.49778	7.17524	6.72745	6.00124	6.43203	5.7262	5.8486	5.72728
4.35333	7.32725	6.92608	7.0968	7.0282	6.49148	7.17454	6.72835	6.00264	6.43583	5.725	5.8465	5.72758
4.35667	7.32815	6.92598	7.0972	7.0322	6.49178	7.17524	6.72825	6.00374	6.43503	5.7248	5.8457	5.72898
4.36	7.33055	6.92678	7.0974	7.0258	6.49648	7.17544	6.72875	6.00124	6.43223	5.7273	5.846	5.73088
4.36333	7.33155	6.92798	7.0983	7.0302	6.49708	7.17624	6.72735	6.00144	6.43313	5.7275	5.8478	5.73068
4.36667	7.32995	6.93028	7.0979	7.0324	6.49948	7.17604	6.73015	6.00444	6.43553	5.7283	5.8474	5.73068
4.37	7.33015	6.92838	7.0962	7.0308	6.50068	7.17814	6.73215	6.00204	6.43443	5.7265	5.8442	5.73208
4.37333	7.32965	6.92908	7.0967	7.0294	6.49618	7.17954	6.73165	6.00374	6.43293	5.7247	5.8466	5.73288
4.37667	7.33105	6.92978	7.0966	7.0348	6.49448	7.18024	6.73245	6.00404	6.43523	5.724	5.847	5.73168
4.38	7.32975	6.92998	7.095	7.0343	6.49338	7.17934	6.73165	6.00114	6.43143	5.7236	5.8496	5.73218
4.38333	7.33055	6.92908	7.0968	7.0339	6.49238	7.17934	6.73275	6.00064	6.43583	5.7235	5.8506	5.73248
4.38667	7.32585	6.92938	7.0969	7.0341	6.49058	7.17804	6.73255	6.00034	6.43963	5.7266	5.8546	5.73188
4.39	7.32345	6.93008	7.0979	7.0359	6.49498	7.17714	6.73655	5.99914	6.44043	5.7284	5.8547	5.73048
4.39333	7.31805	6.92918	7.098	7.0353	6.49418	7.17654	6.73705	5.99744	6.44273	5.7273	5.8563	5.73078
4.39667	7.32635	6.92908	7.1	7.0326	6.49418	7.17834	6.73755	5.99874	6.44703	5.7288	5.8567	5.72848
4.4	7.33225	6.93008	7.0988	7.0323	6.49008	7.18044	6.73565	6.00054	6.44573	5.7283	5.8565	5.72998
4.40333	7.33315	6.93328	7.1009	7.0292	6.49218	7.18024	6.73595	6.00374	6.44733	5.7279	5.8516	5.72908
4.40667	7.33635	6.93308	7.0998	7.0279	6.49258	7.17974	6.73075	6.00464	6.44963	5.7302	5.8504	5.72898
4.41	7.34145	6.93438	7.1006	7.0287	6.49568	7.17984	6.73155	6.00974	6.44733	5.7316	5.8537	5.73028
4.41333	7.33245	6.93628	7.1007	7.0365	6.49758	7.17954	6.73165	6.01304	6.44723	5.7327	5.852	5.73458
4.41667	7.32725	6.93658	7.1006	7.0338	6.50038	7.17874	6.73225	6.01304	6.44783	5.7322	5.8521	5.73388
4.42	7.32765	6.93598	7.1011	7.0288	6.49988	7.17884	6.73305	6.01454	6.44723	5.7332	5.8556	5.73458
4.42333	7.32905	6.93658	7.1035	7.0346	6.49978	7.18084	6.73675	6.01404	6.44733	5.7309	5.8595	5.73448
4.42667	7.33445	6.93498	7.1033	7.0314	6.49858	7.18194	6.73325	6.01004	6.44953	5.7322	5.8578	5.73388
4.43	7.33125	6.93448	7.1038	7.0261	6.49738	7.18184	6.73475	6.00844	6.44873	5.7299	5.8607	5.73248
4.43333	7.33005	6.93338	7.1063	7.0319	6.49868	7.18244	6.73375	6.00744	6.44983	5.7309	5.858	5.73348
4.43667	7.33815	6.93438	7.1047	7.0397	6.50318	7.18394	6.73525	6.00384	6.44833	5.7307	5.8612	5.73348
4.44	7.33525	6.93548	7.1035	7.0349	6.50458	7.18254	6.73415	6.00514	6.45163	5.7315	5.859	5.73388
4.44333	7.33055	6.93698	7.1027	7.038	6.50188	7.18314	6.73735	6.00614	6.45103	5.7308	5.8581	5.73438
4.44667	7.33465	6.93678	7.1028	7.0386	6.50198	7.18414	6.73655	6.00474	6.45073	5.7328	5.8572	5.73448
4.45	7.33535	6.93818	7.1003	7.038	6.50148	7.18254	6.73515	6.00764	6.45243	5.7317	5.8601	5.73388
4.45333	7.32965	6.93698	7.1013	7.0387	6.49878	7.18384	6.73145	6.00874	6.45453	5.7331	5.8612	5.73628
4.45667	7.33235	6.93698	7.1025	7.0396	6.49748	7.18604	6.73365	6.00904	6.44883	5.7347	5.8623	5.73548
4.46	7.33215	6.93718	7.105	7.0435	6.49858	7.18674	6.73405	6.01264	6.44803	5.7345	5.8643	5.73688
4.46333	7.33275	6.93628	7.1048	7.0456	6.49988	7.18654	6.73375	6.01614	6.44853	5.7332	5.8629	5.73718
4.46667	7.33495	6.93468	7.1061	7.0433	6.49738	7.18744	6.73535	6.01584	6.44873	5.7345	5.8635	5.73738
4.47	7.33225	6.93778	7.1061	7.0406	6.49618	7.18684	6.73715	6.01984	6.44783	5.7354	5.8646	5.73778
4.47333	7.33405	6.93598	7.1068	7.0417	6.49838	7.18744	6.73755	6.02114	6.45093	5.7352	5.8661	5.74028
4.47667	7.33025	6.93678	7.1058	7.0412	6.50088	7.18644	6.73675	6.01904	6.45433	5.7353	5.8651	5.74078
4.48	7.33515	6.93778	7.1073	7.0342	6.49968	7.18824	6.73625	6.01654	6.45343	5.7367	5.865	5.74208
4.48333	7.33555	6.93958	7.1073	7.0409	6.50458	7.19034	6.73575	6.01534	6.45063	5.739	5.8672	5.74188
4.48667	7.33955	6.93688	7.1091	7.037	6.50348	7.18834	6.73505	6.01244	6.45123	5.7368	5.8623	5.74048
4.49	7.33875	6.93828	7.107	7.0331	6.50308	7.18694	6.73635	6.01074	6.45223	5.7375	5.8623	5.73988
4.49333	7.34095	6.93678	7.107	7.0328	6.50218	7.18794	6.73545	6.01184	6.44933	5.7403	5.8601	5.73918
4.49667	7.34075	6.93658	7.1071	7.0351	6.50188	7.18714	6.73815	6.01064	6.45353	5.7404	5.8633	5.74018
4.5	7.34045	6.93578	7.1078	7.03	6.50218	7.18704	6.74005	6.00964	6.45723	5.7379	5.8629	5.74288
4.50333	7.33855	6.93758	7.1067	7.0357	6.50308	7.18904	6.74405	6.01214	6.45863	5.738	5.8662	5.74328
4.50667	7.33675	6.93728	7.1079	7.0386	6.49728	7.18944	6.74265	6.01264	6.45743	5.7377	5.8642	5.74718
4.51	7.33785	6.93758	7.1092	7.0315	6.49838	7.18904	6.74485	6.01164	6.46043	5.7372	5.8674	5.74958
4.51333	7.33575	6.93738	7.1097	7.0367	6.50178	7.18994	6.74345	6.01614	6.46033	5.738	5.8703	5.75008
4.51667	7.34055	6.93718	7.109	7.0365	6.49848	7.18934	6.74525	6.01614	6.45533	5.7416	5.8703	5.74848
4.52	7.34095	6.93678	7.1103	7.0356	6.49748	7.18884	6.74375	6.01654	6.45253	5.743	5.8708	5.74798
4.52333	7.34405	6.93668	7.1094	7.0347	6.50488	7.18894	6.74425	6.01544	6.45043	5.7447	5.8701	5.74538
4.52667	7.34115	6.93778	7.1096	7.038	6.50718	7.19044	6.74545	6.01784	6.44893	5.7432	5.872	5.74548
4.53	7.34195	6.93788	7.1101	7.0371	6.50498	7.18874	6.74685	6.01524	6.44773	5.7435	5.8695	5.74498
4.53333	7.33885	6.93818	7.1118	7.0362	6.50838	7.18934	6.74555	6.01694	6.44723	5.7401	5.8712	5.74698
4.53667	7.34135	6.94028	7.1128	7.0369	6.51478	7.19174	6.74445	6.01544	6.44653	5.7414	5.8713	5.74928
4.54	7.33365	6.94148	7.115	7.0394	6.51128	7.19314	6.74545	6.01564	6.45173	5.7382	5.8753	5.74988
4.54333	7.34135	6.94138	7.1148	7.0386	6.50378	7.19184	6.74515	6.01334	6.45153	5.7399	5.8764	5.75008
4.54667	7.33595	6.94328	7.1148	7.0403	6.50538	7.19294	6.74405	6.01574	6.45243	5.7393	5.8767	5.75318
4.55	7.34215	6.94498	7.1144	7.0418	6.50398	7.19254	6.74305	6.01474	6.45393	5.7396	5.8774	5.75128
4.55333	7.34195	6.94278	7.1126	7.0425	6.50498	7.19164	6.74365	6.01404	6.45993	5.7395	5.8797	5.75048
4.55667	7.34995	6.94428	7.113	7.0404	6.50518	7.19184	6.74375	6.01574	6.45993	5.7418	5.8786	5.74978
4.56	7.34475	6.94358	7.1133	7.0408	6.50858	7.19224	6.74145	6.01774	6.46163	5.7409	5.8754	5.74848
4.56333	7.34995	6.94288	7.1139	7.0385	6.50878	7.19484	6.74345	6.01534	6.46193	5.7413	5.875	5.74468
4.56667	7.34415	6.94128	7.1155	7.0373	6.50548	7.19534	6.74525	6.01844	6.46233	5.7442	5.8741	5.74518
4.57	7.34335	6.94188	7.1168	7.0371	6.50108	7.19514	6.74585	6.02114	6.46143	5.743	5.8721	5.74418
4.57333	7.34445	6.93918	7.1167	7.0388	6.50208	7.19534	6.74525	6.02114	6.46143	5.7428	5.8727	5.74698
4.57667	7.34365	6.94028	7.1171	7.0386	6.50228	7.19544	6.74925	6.02184	6.46033	5.7455	5.8743	5.74768
4.58	7.34495	6.94098	7.1167	7.044	6.49998	7.19474	6.74975	6.02514	6.46193	5.7462	5.8755	5.74818
4.58333	7.34195	6.94248	7.1171	7.0438	6.50248	7.19374	6.74945	6.02574	6.46553	5.7451	5.8726	5.74778
4.58667	7.34675	6.94108	7.1172	7.046	6.50478	7.19354	6.74985	6.02514	6.46693	5.7453	5.876	5.75048
4.59	7.34465	6.94168	7.1158	7.0452	6.50788	7.19534	6.75145	6.02794	6.46693	5.7454	5.8773	5.74968
4.59333	7.34775	6.94018	7.1171	7.0479	6.51178	7.19744	6.74945	6.02994	6.46673	5.745	5.8791	5.75118
4.59667	7.34875	6.93988	7.1171	7.0445	6.51608	7.19664	6.74885	6.02874	6.46503	5.7449	5.8777	5.75388
4.6	7.35045	6.93948	7.1159	7.0473	6.51628	7.19734	6.74785	6.02804	6.46093	5.7462	5.8827	5.75688
4.60333	7.34655	6.94108	7.1172	7.0477	6.51548	7.19914	6.74835	6.02874	6.45803	5.7473	5.8811	5.75718
4.60667	7.35025	6.94098	7.1189	7.0518	6.50998	7.19684	6.74905	6.02644	6.45803	5.7466	5.8795	5.75748
4.61	7.34815	6.94248	7.1182	7.0485	6.50878	7.19674	6.74965	6.02514	6.46033	5.7452	5.8777	5.75668
4.61333	7.34765	6.94148	7.118	7.0421	6.50898	7.19874	6.74835	6.02604	6.46153	5.7459	5.8804	5.75468
4.61667	7.34825	6.94228	7.1184	7.0476	6.50748	7.19954	6.75225	6.02654	6.46623	5.7453	5.8803	5.75428
4.62	7.35345	6.94028	7.1182	7.0391	6.50858	7.19894	6.75325	6.02664	6.46743	5.7454	5.8804	5.75448
4.62333	7.34515	6.93908	7.1185	7.0385	6.51178	7.19984	6.75285	6.02764	6.46683	5.7472	5.8814	5.75498
4.62667	7.34555	6.93808	7.1187	7.0414	6.50898	7.19934	6.75205	6.02864	6.46853	5.7464	5.88	5.75588
4.63	7.35265	6.93878	7.1202	7.051	6.50748	7.19674	6.75345	6.02964	6.46723	5.747	5.8792	5.75638
4.63333	7.35085	6.93788	7.1198	7.0452	6.51048	7.19744	6.75165	6.03154	6.46543	5.7471	5.8789	5.75738
4.63667	7.34125	6.94128	7.1193	7.0514	6.50488	7.19804	6.75325	6.03334	6.46423	5.7472	5.8791	5.75598
4.64	7.34975	6.94288	7.1191	7.0498	6.50128	7.19634	6.75085	6.03274	6.46313	5.7454	5.8766	5.75668
4.64333	7.35255	6.94438	7.1188	7.0497	6.50398	7.19744	6.75215	6.03274	6.46203	5.7461	5.8802	5.75778
4.64667	7.34515	6.94628	7.1194	7.0441	6.50688	7.19864	6.74985	6.03294	6.46403	5.7456	5.881	5.76038
4.65	7.34855	6.94558	7.1204	7.0466	6.50768	7.19894	6.75175	6.03014	6.46563	5.7457	5.8821	5.75908
4.65333	7.34985	6.94528	7.1217	7.0478	6.51338	7.19804	6.75095	6.02644	6.46823	5.7468	5.8827	5.76238
4.65667	7.34495	6.94588	7.122	7.0478	6.51658	7.19954	6.75215	6.02704	6.47143	5.7475	5.8841	5.76178
4.66	7.33815	6.94728	7.1233	7.0476	6.51618	7.19904	6.75005	6.02624	6.47333	5.7482	5.8871	5.76028
4.66333	7.33795	6.94758	7.1231	7.0491	6.51458	7.19844	6.75345	6.02454	6.47243	5.7502	5.8868	5.75908
4.66667	7.33905	6.94798	7.1247	7.0486	6.51318	7.19984	6.75265	6.02394	6.46993	5.7511	5.887	5.76078
4.67	7.34585	6.94658	7.1246	7.0487	6.51148	7.19934	6.75195	6.02634	6.46853	5.7504	5.8857	5.76358
4.67333	7.35265	6.94518	7.1245	7.0469	6.51178	7.19964	6.75105	6.02804	6.46713	5.7518	5.8877	5.76658
4.67667	7.35445	6.94598	7.1242	7.0476	6.50858	7.19924	6.75385	6.03054	6.46833	5.752	5.886	5.76788
4.68	7.35895	6.94528	7.124	7.0507	6.50828	7.19954	6.75225	6.03244	6.46963	5.7528	5.8879	5.76978
4.68333	7.35975	6.94498	7.1227	7.0478	6.50768	7.19774	6.75495	6.03414	6.47123	5.753	5.887	5.77258
4.68667	7.35655	6.94528	7.1236	7.0476	6.50738	7.20004	6.75585	6.03594	6.47493	5.7531	5.8873	5.76958
4.69	7.35285	6.94598	7.1241	7.0524	6.51018	7.20184	6.75815	6.03484	6.47833	5.7544	5.8894	5.76908
4.69333	7.35385	6.94458	7.1249	7.0556	6.51348	7.20234	6.75685	6.03404	6.47623	5.7541	5.8896	5.77128
4.69667	7.35145	6.94528	7.1255	7.0586	6.51548	7.20324	6.75965	6.03374	6.47773	5.7521	5.8871	5.77088
4.7	7.34805	6.94698	7.1266	7.0594	6.51508	7.20524	6.75665	6.03594	6.47873	5.7522	5.886	5.76788
4.70333	7.34975	6.94648	7.1258	7.0503	6.51388	7.20544	6.75385	6.03454	6.47923	5.7535	5.8885	5.76848
4.70667	7.35235	6.94808	7.1269	7.0483	6.51578	7.20384	6.75315	6.03334	6.47733	5.7545	5.8866	5.76918
4.71	7.35565	6.94738	7.1266	7.0509	6.51888	7.20514	6.75495	6.03344	6.47893	5.7575	5.8851	5.76658
4.71333	7.35785	6.94758	7.1268	7.0463	6.51018	7.20504	6.75555	6.03234	6.47883	5.7582	5.889	5.76398
4.71667	7.36195	6.94668	7.1275	7.0447	6.51198	7.20544	6.75515	6.03034	6.48133	5.7593	5.8894	5.76418
4.72	7.35895	6.94748	7.1273	7.0536	6.51518	7.20534	6.75655	6.03104	6.47853	5.7608	5.8891	5.76308
4.72333	7.36065	6.94628	7.1289	7.052	6.51158	7.20554	6.75755	6.03434	6.47993	5.7585	5.891	5.76228
4.72667	7.36045	6.94698	7.1296	7.0441	6.50938	7.20504	6.75755	6.03504	6.47933	5.7583	5.8918	5.76368
4.73	7.35795	6.94668	7.1294	7.0445	6.51718	7.20534	6.75535	6.03774	6.48053	5.7589	5.8917	5.76538
4.73333	7.35635	6.94618	7.1288	7.0508	6.51698	7.20414	6.75455	6.03954	6.47783	5.7589	5.895	5.76758
4.73667	7.36315	6.94738	7.1301	7.0534	6.51378	7.20424	6.75595	6.04134	6.47773	5.7574	5.8948	5.76888
4.74	7.35995	6.94548	7.1298	7.0495	6.51428	7.20574	6.75855	6.04074	6.47833	5.7589	5.8944	5.76848
4.74333	7.35955	6.94398	7.1297	7.0545	6.51398	7.20704	6.75845	6.04224	6.47673	5.7586	5.8963	5.76828
4.74667	7.36165	6.94418	7.1318	7.056	6.51458	7.20694	6.76095	6.04004	6.47583	5.7596	5.8953	5.76818
4.75	7.36405	6.94598	7.1322	7.0558	6.51458	7.20764	6.76235	6.03974	6.47793	5.7598	5.8943	5.76518
4.75333	7.36075	6.94458	7.1314	7.0543	6.51918	7.20764	6.76185	6.03984	6.47553	5.7605	5.8924	5.76638
4.75667	7.36785	6.94778	7.1306	7.0645	6.51728	7.20734	6.76105	6.03874	6.47343	5.761	5.8919	5.76448
4.76	7.36445	6.94908	7.1324	7.0626	6.51508	7.20614	6.76125	6.03894	6.47393	5.7596	5.8923	5.76508
4.76333	7.36045	6.94948	7.1302	7.0642	6.51368	7.20704	6.75745	6.04234	6.47183	5.7588	5.8915	5.76718
4.76667	7.36245	6.94948	7.1312	7.0612	6.51308	7.20884	6.75745	6.04314	6.47303	5.756	5.8925	5.77058
4.77	7.36345	6.95108	7.1312	7.0656	6.51148	7.20954	6.75815	6.04354	6.47733	5.7571	5.8947	5.77278
4.77333	7.35325	6.95188	7.1314	7.0608	6.51358	7.20964	6.75785	6.04604	6.47773	5.757	5.8961	5.77788
4.77667	7.36025	6.95048	7.1299	7.0658	6.51698	7.21034	6.75885	6.04474	6.47603	5.7578	5.8976	5.77778
4.78	7.36295	6.94978	7.1311	7.0648	6.51738	7.20954	6.76135	6.04364	6.48073	5.7585	5.8967	5.77898
4.78333	7.35635	6.95028	7.1291	7.0673	6.51768	7.20834	6.76355	6.04234	6.47733	5.7607	5.8977	5.77798
4.78667	7.35875	6.94858	7.1289	7.0616	6.51748	7.20804	6.76315	6.04044	6.47863	5.7589	5.8981	5.77718
4.79	7.36155	6.94708	7.1303	7.0602	6.51658	7.20874	6.76335	6.03954	6.48103	5.7598	5.9005	5.77628
4.79333	7.35555	6.94878	7.1304	7.0571	6.51638	7.20984	6.76255	6.03854	6.48493	5.7616	5.8982	5.77728
4.79667	7.35835	6.94918	7.1314	7.0601	6.51408	7.21194	6.76075	6.03994	6.48493	5.7618	5.8996	5.77648
4.8	7.35995	6.94928	7.1313	7.0591	6.51588	7.21234	6.76105	6.04164	6.48733	5.7634	5.9	5.77648
4.80333	7.35835	6.95088	7.1333	7.0587	6.51698	7.21344	6.76245	6.04554	6.48783	5.7648	5.9027	5.77618
4.80667	7.35635	6.94998	7.1326	7.058	6.51798	7.21374	6.76055	6.04614	6.48633	5.7645	5.8973	5.77558
4.81	7.35645	6.94978	7.1331	7.0535	6.51868	7.21154	6.76175	6.04914	6.48643	5.765	5.8995	5.77598
4.81333	7.35415	6.94888	7.1326	7.047	6.52118	7.20974	6.76485	6.05114	6.48563	5.7641	5.8965	5.77718
4.81667	7.35685	6.94848	7.1342	7.0511	6.52108	7.21014	6.76485	6.05154	6.48633	5.7615	5.8949	5.77948
4.82	7.35825	6.94788	7.1325	7.0525	6.51888	7.21024	6.76275	6.05014	6.48593	5.7603	5.8951	5.78118
4.82333	7.35625	6.94928	7.1326	7.0554	6.51718	7.21004	6.76645	6.05114	6.48793	5.7595	5.8998	5.78068
4.82667	7.35315	6.94838	7.1336	7.0624	6.52078	7.21214	6.76605	6.04884	6.48633	5.7586	5.8983	5.78248
4.83	7.35055	6.94958	7.1332	7.0675	6.51278	7.21394	6.76435	6.04534	6.48663	5.7592	5.9022	5.78438
4.83333	7.34845	6.95008	7.1339	7.0611	6.51398	7.21324	6.76025	6.04554	6.48573	5.7603	5.9044	5.78418
4.83667	7.34325	6.94938	7.1336	7.0619	6.51738	7.21444	6.76225	6.04634	6.48203	5.7603	5.9052	5.78268
4.84	7.34995	6.95048	7.1345	7.0605	6.51858	7.21414	6.76045	6.04394	6.47943	5.7615	5.905	5.78548
4.84333	7.35865	6.95308	7.1331	7.0586	6.51318	7.21574	6.75795	6.04524	6.48263	5.7616	5.9054	5.78378
4.84667	7.36105	6.95228	7.1327	7.0542	6.52218	7.21444	6.76205	6.04694	6.48493	5.7614	5.9079	5.78198
4.85	7.36305	6.95268	7.1313	7.0565	6.52018	7.21534	6.76545	6.04614	6.48373	5.7648	5.9073	5.78148
4.85333	7.36305	6.95338	7.1331	7.0602	6.51968	7.21414	6.76355	6.04574	6.48713	5.7644	5.9064	5.78148
4.85667	7.35995	6.95128	7.1324	7.0616	6.51878	7.21244	6.76395	6.04574	6.48793	5.7648	5.907	5.78048
4.86	7.35365	6.94998	7.133	7.058	6.52298	7.21054	6.76685	6.04474	6.48313	5.7678	5.9085	5.78108
4.86333	7.35195	6.94968	7.1341	7.067	6.51938	7.21284	6.76505	6.04484	6.48103	5.7681	5.9095	5.78148
4.86667	7.35295	6.94968	7.1356	7.0614	6.51878	7.21274	6.76625	6.04424	6.48423	5.7659	5.9108	5.78138
4.87	7.35935	6.95148	7.1365	7.0605	6.51768	7.21334	6.76865	6.04384	6.48653	5.7689	5.9118	5.78028
4.87333	7.36335	6.95068	7.1357	7.0659	6.51868	7.21524	6.76725	6.04554	6.48513	5.7688	5.9112	5.77958
4.87667	7.36485	6.95068	7.1345	7.0678	6.51628	7.21564	6.76775	6.04724	6.49113	5.7679	5.9125	5.78028
4.88	7.37015	6.95168	7.1344	7.0599	6.51968	7.21554	6.76795	6.04744	6.49303	5.7694	5.9114	5.77988
4.88333	7.37095	6.95088	7.1356	7.0674	6.51938	7.21594	6.76855	6.04824	6.49193	5.7702	5.9101	5.78068
4.88667	7.36745	6.95028	7.134	7.0637	6.52008	7.21724	6.76795	6.04994	6.48933	5.7699	5.9076	5.78278
4.89	7.37135	6.95418	7.1341	7.0582	6.51978	7.21914	6.76825	6.05144	6.49493	5.771	5.909	5.78488
4.89333	7.37675	6.95418	7.1354	7.0558	6.51858	7.21914	6.76935	6.05234	6.49253	5.769	5.9104	5.78568
4.89667	7.37655	6.95448	7.1341	7.0578	6.51828	7.21634	6.76915	6.05334	6.49073	5.768	5.909	5.78768
4.9	7.37605	6.95618	7.1346	7.058	6.51878	7.21664	6.76905	6.05424	6.49203	5.7684	5.9103	5.78848
4.90333	7.37535	6.95508	7.1352	7.0606	6.52098	7.21574	6.76945	6.05464	6.49243	5.7694	5.9134	5.78878
4.90667	7.37015	6.95598	7.1363	7.06	6.52048	7.21504	6.77165	6.05444	6.49053	5.7683	5.9103	5.78888
4.91	7.37185	6.95708	7.1359	7.0611	6.52168	7.21574	6.77185	6.05584	6.48933	5.7704	5.9099	5.78868
4.91333	7.36925	6.95868	7.138	7.0599	6.52238	7.21704	6.77035	6.05424	6.49063	5.7707	5.9139	5.78768
4.91667	7.36485	6.95808	7.1364	7.0569	6.52228	7.21714	6.77145	6.05604	6.49003	5.7707	5.9144	5.78658
4.92	7.36835	6.95928	7.1374	7.0571	6.52028	7.21824	6.77205	6.05654	6.48833	5.7699	5.9134	5.78728
4.92333	7.36795	6.95618	7.1383	7.0583	6.51948	7.21854	6.76875	6.05764	6.48623	5.7691	5.9149	5.78768
4.92667	7.36395	6.95618	7.1378	7.0622	6.51908	7.21964	6.76615	6.05724	6.48683	5.7686	5.9121	5.78618
4.93	7.36645	6.95228	7.1367	7.0611	6.51498	7.22144	6.76895	6.05924	6.48643	5.7686	5.9089	5.78618
4.93333	7.36805	6.95468	7.1359	7.0604	6.51218	7.22114	6.76865	6.05774	6.48593	5.7701	5.9097	5.78808
4.93667	7.37105	6.95348	7.1353	7.0623	6.51288	7.21984	6.77205	6.05664	6.48973	5.7718	5.9094	5.79098
4.94	7.37195	6.95248	7.1343	7.0641	6.52008	7.21984	6.77445	6.05564	6.49003	5.7732	5.9132	5.79038
4.94333	7.37785	6.95468	7.1358	7.0645	6.51508	7.21884	6.77615	6.05374	6.48903	5.7718	5.9137	5.79348
4.94667	7.37455	6.95768	7.1366	7.0654	6.52188	7.22004	6.77465	6.05274	6.49053	5.7708	5.9146	5.79328
4.95	7.37605	6.95478	7.1367	7.0671	6.52478	7.21964	6.77225	6.05194	6.49183	5.7704	5.9127	5.79508
4.95333	7.37115	6.95658	7.1376	7.0656	6.52458	7.22104	6.76885	6.05144	6.48913	5.7695	5.9138	5.79268
4.95667	7.36675	6.96048	7.1378	7.0653	6.51998	7.22134	6.77075	6.05094	6.49623	5.7704	5.9126	5.79448
4.96	7.36565	6.95768	7.1383	7.0644	6.52618	7.22134	6.76815	6.05104	6.49933	5.7707	5.9156	5.79338
4.96333	7.36755	6.95838	7.1383	7.0663	6.52048	7.22064	6.77015	6.05124	6.49833	5.7722	5.918	5.79478
4.96667	7.36895	6.95828	7.1398	7.0662	6.52218	7.22294	6.77195	6.05284	6.49883	5.7722	5.919	5.79118
4.97	7.36775	6.95858	7.1409	7.0668	6.52058	7.22404	6.77355	6.05354	6.50223	5.7726	5.919	5.79068
4.97333	7.37245	6.95778	7.1412	7.0659	6.51988	7.22434	6.77205	6.05364	6.49893	5.772	5.9187	5.78938
4.97667	7.37055	6.95758	7.1413	7.0663	6.51668	7.22494	6.77615	6.05474	6.49983	5.7738	5.9167	5.78798
4.98	7.37335	6.95728	7.1411	7.0649	6.52168	7.22284	6.77275	6.05594	6.49903	5.7752	5.9173	5.78738
4.98333	7.38035	6.95958	7.1408	7.0639	6.52218	7.22304	6.77285	6.05694	6.49913	5.7755	5.9171	5.78748
4.98667	7.38565	6.95988	7.1409	7.066	6.52338	7.22144	6.77295	6.05864	6.50173	5.7754	5.9173	5.78678
4.99	7.38735	6.95858	7.1419	7.0667	6.52368	7.22194	6.77585	6.06044	6.50173	5.7752	5.9165	5.78488
4.99333	7.38485	6.95938	7.1427	7.0666	6.52388	7.22244	6.77435	6.06154	6.50363	5.7762	5.9175	5.78528
4.99667	7.38595	6.95818	7.143	7.0688	6.52168	7.22464	6.77835	6.06184	6.50483	5.7764	5.9194	5.78718
5	7.37665	6.95598	7.1439	7.0706	6.51978	7.22394	6.77775	6.06154	6.50553	5.7754	5.9186	5.78808
5.00333	7.37805	6.95548	7.1449	7.0697	6.52018	7.22494	6.77565	6.06154	6.50123	5.7731	5.9204	5.78858
5.00667	7.37765	6.95598	7.1436	7.0663	6.51928	7.22474	6.77355	6.06224	6.49913	5.7744	5.9185	5.79148
5.01	7.37945	6.95768	7.143	7.0681	6.52128	7.22384	6.77485	6.06294	6.49733	5.7728	5.9203	5.79468
5.01333	7.37125	6.95858	7.1444	7.0693	6.52148	7.22274	6.77415	6.06414	6.49863	5.7713	5.916	5.79398
5.01667	7.37345	6.95828	7.145	7.0684	6.52128	7.22344	6.77385	6.06384	6.49693	5.7714	5.9192	5.79568
5.02	7.37235	6.95908	7.1431	7.0712	6.51948	7.22474	6.77265	6.06394	6.49613	5.7748	5.9181	5.79748
5.02333	7.37655	6.95828	7.1448	7.0764	6.52148	7.22494	6.77505	6.06314	6.49953	5.7736	5.9236	5.79678
5.02667	7.37595	6.95698	7.1442	7.0745	6.52158	7.22534	6.77285	6.06294	6.49873	5.7744	5.923	5.79728
5.03	7.38525	6.95788	7.1437	7.0744	6.52168	7.22744	6.77125	6.06154	6.49833	5.7766	5.9266	5.79748
5.03333	7.38415	6.95828	7.1422	7.0756	6.52378	7.22774	6.77375	6.06134	6.49963	5.7774	5.9258	5.79868
5.03667	7.38295	6.95898	7.1417	7.0742	6.52478	7.22674	6.77685	6.05974	6.50093	5.7783	5.9264	5.80068
5.04	7.37815	6.95898	7.1412	7.0727	6.52468	7.22784	6.77375	6.05884	6.49793	5.7795	5.9244	5.80068
5.04333	7.38305	6.95798	7.1411	7.0716	6.52498	7.22934	6.77485	6.05734	6.50023	5.7794	5.9246	5.79918
5.04667	7.37805	6.95798	7.1416	7.0714	6.52418	7.22854	6.77385	6.05764	6.50023	5.7792	5.923	5.79838
5.05	7.37875	6.95898	7.1434	7.073	6.52228	7.22824	6.77175	6.05814	6.50113	5.7798	5.921	5.79658
5.05333	7.37455	6.95658	7.1437	7.0731	6.52068	7.22874	6.77035	6.06164	6.50113	5.7784	5.9208	5.79698
5.05667	7.37315	6.95758	7.1444	7.0769	6.51828	7.22764	6.76965	6.06104	6.50383	5.7795	5.9253	5.79708
5.06	7.36875	6.95918	7.1446	7.0793	6.51598	7.22774	6.77045	6.06424	6.50433	5.7805	5.9234	5.79578
5.06333	7.36845	6.95838	7.1449	7.079	6.51628	7.22754	6.77325	6.06444	6.50543	5.7789	5.9228	5.79678
5.06667	7.37065	6.95568	7.1437	7.0764	6.51698	7.22834	6.77305	6.06624	6.50383	5.7788	5.9231	5.79648
5.07	7.37485	6.95528	7.1449	7.0758	6.51978	7.22584	6.77505	6.06624	6.50413	5.7787	5.9256	5.79348
5.07333	7.37325	6.95598	7.1453	7.0736	6.52368	7.22654	6.77585	6.06864	6.50073	5.7768	5.9228	5.79338
5.07667	7.37655	6.95558	7.1464	7.0753	6.52508	7.22584	6.77655	6.06784	6.49993	5.7773	5.9255	5.79398
5.08	7.37625	6.95558	7.145	7.0774	6.52668	7.22724	6.77855	6.06654	6.50013	5.7792	5.929	5.79328
5.08333	7.37025	6.95598	7.1445	7.0811	6.52778	7.22564	6.78195	6.06404	6.50093	5.7783	5.9322	5.79328
5.08667	7.36735	6.95828	7.1456	7.0812	6.52838	7.22834	6.78125	6.06204	6.49933	5.779	5.9323	5.79308
5.09	7.36945	6.95668	7.1452	7.0812	6.52658	7.22744	6.78385	6.06114	6.50203	5.7806	5.9281	5.79318
5.09333	7.36605	6.95538	7.1459	7.08	6.52718	7.22824	6.78415	6.06124	6.50323	5.7804	5.9272	5.79368
5.09667	7.36415	6.95608	7.1464	7.078	6.52528	7.22764	6.78155	6.06184	6.50153	5.779	5.9262	5.79258
5.1	7.36445	6.95688	7.1489	7.0771	6.52368	7.22844	6.77985	6.06454	6.50163	5.7796	5.9262	5.79378
5.10333	7.36815	6.95538	7.1475	7.0759	6.52318	7.22734	6.78025	6.06584	6.50283	5.7793	5.922	5.79348
5.10667	7.37205	6.95758	7.1488	7.0756	6.52458	7.22834	6.78175	6.06764	6.50213	5.7794	5.9279	5.79178
5.11	7.37545	6.95928	7.1488	7.0783	6.52428	7.22634	6.78085	6.06894	6.50033	5.7793	5.9298	5.78988
5.11333	7.38235	6.95828	7.1486	7.0771	6.52398	7.22614	6.78025	6.07214	6.50073	5.7809	5.9293	5.79058
5.11667	7.38915	6.95858	7.1486	7.0778	6.52278	7.22754	6.78065	6.07204	6.50103	5.7812	5.9294	5.79118
5.12	7.38985	6.96018	7.1495	7.0756	6.52528	7.22794	6.78295	6.07334	6.50303	5.7817	5.9318	5.79088
5.12333	7.38715	6.95948	7.1481	7.0777	6.52348	7.22744	6.78335	6.07234	6.50203	5.7818	5.9312	5.79348
5.12667	7.38675	6.95848	7.1475	7.0733	6.52648	7.22864	6.78275	6.07204	6.49873	5.7817	5.9294	5.79518
5.13	7.38435	6.95788	7.1487	7.0765	6.52758	7.22994	6.78745	6.06884	6.49933	5.7807	5.9314	5.79818
5.13333	7.38175	6.95908	7.1483	7.0753	6.53138	7.22884	6.78975	6.06804	6.49873	5.7822	5.9321	5.79708
5.13667	7.37845	6.95688	7.1478	7.0735	6.52688	7.23084	6.78815	6.06484	6.50123	5.782	5.9319	5.79608
5.14	7.37695	6.95698	7.1486	7.071	6.52828	7.23144	6.78555	6.06294	6.50243	5.7821	5.9327	5.79448
5.14333	7.37275	6.95628	7.1486	7.0712	6.52948	7.23314	6.78635	6.06284	6.50623	5.7836	5.9313	5.79448
5.14667	7.37285	6.95778	7.1502	7.0685	6.53088	7.23334	6.78305	6.06384	6.50663	5.7877	5.931	5.79218
5.15	7.37405	6.95648	7.1501	7.068	6.52958	7.23434	6.78085	6.06374	6.50663	5.7854	5.9313	5.79198
5.15333	7.37535	6.95668	7.1502	7.0728	6.53108	7.23354	6.77975	6.06724	6.50833	5.7872	5.9332	5.79478
5.15667	7.37525	6.95568	7.1497	7.0701	6.53228	7.23404	6.78025	6.06854	6.51013	5.7862	5.9317	5.79518
5.16	7.37765	6.95728	7.1512	7.07	6.52718	7.23244	6.78125	6.06924	6.50983	5.7857	5.9336	5.79588
5.16333	7.37805	6.95848	7.1498	7.0674	6.52208	7.23184	6.78275	6.07094	6.50783	5.7842	5.9351	5.79648
5.16667	7.38025	6.95988	7.148	7.0661	6.52288	7.22994	6.78285	6.07184	6.50963	5.7861	5.9354	5.79638
5.17	7.38025	6.96068	7.147	7.068	6.52398	7.23014	6.78525	6.07174	6.50593	5.7857	5.9353	5.79718
5.17333	7.38665	6.96068	7.1467	7.0717	6.52188	7.23164	6.78655	6.07414	6.50323	5.7885	5.9364	5.79718
5.17667	7.38805	6.95988	7.1465	7.0706	6.52398	7.23354	6.78765	6.07074	6.50423	5.7875	5.9365	5.79788
5.18	7.38945	6.95778	7.1476	7.0778	6.52888	7.23554	6.78555	6.06864	6.50463	5.7855	5.9366	5.79578
5.18333	7.38435	6.95838	7.149	7.0797	6.52798	7.23664	6.78625	6.06724	6.50533	5.786	5.9349	5.79708
5.18667	7.38595	6.95908	7.1507	7.0767	6.52758	7.23764	6.78595	6.06624	6.50603	5.7867	5.9353	5.79648
5.19	7.38225	6.96018	7.1507	7.0735	6.52978	7.23874	6.78445	6.06364	6.51043	5.7852	5.9331	5.79688
5.19333	7.38365	6.96238	7.1513	7.0747	6.52808	7.23774	6.78365	6.06724	6.50763	5.7856	5.9374	5.79618
5.19667	7.38365	6.96378	7.1505	7.0699	6.52558	7.23674	6.78505	6.07054	6.50703	5.7854	5.9344	5.79738
5.2	7.38885	6.96298	7.1514	7.0725	6.52478	7.23774	6.78335	6.07244	6.50603	5.7842	5.9377	5.79858
5.20333	7.39035	6.96528	7.1512	7.0737	6.52818	7.23664	6.78425	6.07274	6.50503	5.7841	5.9369	5.79868
5.20667	7.39255	6.96488	7.1513	7.0758	6.52628	7.23464	6.78225	6.07514	6.50313	5.7844	5.9397	5.79838
5.21	7.39175	6.96298	7.1504	7.0752	6.52818	7.23564	6.78315	6.07394	6.50783	5.7851	5.9374	5.79978
5.21333	7.38795	6.96408	7.1512	7.0774	6.52928	7.23574	6.78515	6.07084	6.50893	5.7869	5.9379	5.80068
5.21667	7.38405	6.96258	7.1496	7.0757	6.52768	7.23704	6.78745	6.07114	6.50953	5.7865	5.9364	5.79988
5.22	7.38365	6.95978	7.1496	7.0763	6.52288	7.23884	6.78345	6.07084	6.50873	5.787	5.9376	5.80018
5.22333	7.38465	6.96148	7.1514	7.0769	6.52198	7.23884	6.78705	6.06944	6.50663	5.7874	5.9366	5.80068
5.22667	7.38415	6.96308	7.1521	7.079	6.52318	7.23814	6.78695	6.07054	6.50313	5.7878	5.936	5.79968
5.23	7.38805	6.96008	7.1514	7.0793	6.52548	7.23844	6.78415	6.07134	6.50303	5.7882	5.939	5.80078
5.23333	7.39175	6.96078	7.1527	7.0805	6.52898	7.23554	6.78045	6.07354	6.50063	5.7892	5.9383	5.80078
5.23667	7.39045	6.96218	7.1531	7.0796	6.53058	7.23474	6.78495	6.07494	6.50733	5.7874	5.9407	5.80068
5.24	7.38945	6.96058	7.1524	7.0787	6.53298	7.23614	6.78515	6.07684	6.50953	5.7868	5.9404	5.80118
5.24333	7.38745	6.95708	7.1516	7.0785	6.53168	7.23684	6.77925	6.07814	6.51263	5.7855	5.9426	5.80088
5.24667	7.38635	6.95828	7.1525	7.0745	6.52968	7.23634	6.78095	6.07834	6.51423	5.7836	5.9394	5.80078
5.25	7.38515	6.95698	7.1533	7.0731	6.52898	7.23784	6.78505	6.07694	6.51843	5.7832	5.9411	5.80148
5.25333	7.38615	6.95758	7.1529	7.0722	6.52618	7.23774	6.78555	6.07734	6.51233	5.784	5.9419	5.80118
5.25667	7.38515	6.95728	7.1526	7.0745	6.52458	7.23654	6.78735	6.07714	6.50983	5.7835	5.9436	5.80238
5.26	7.38495	6.95848	7.1534	7.0717	6.52608	7.23524	6.79095	6.07754	6.50733	5.7847	5.9438	5.80458
5.26333	7.38385	6.96078	7.1523	7.0754	6.52628	7.23684	6.79145	6.07624	6.50723	5.7869	5.9459	5.80458
5.26667	7.38365	6.96138	7.153	7.0726	6.52558	7.23804	6.79075	6.07404	6.50573	5.7871	5.9457	5.80288
5.27	7.38345	6.96228	7.1546	7.0728	6.52878	7.23724	6.78875	6.07234	6.50713	5.787	5.9438	5.80428
5.27333	7.37745	6.96248	7.1556	7.0703	6.52818	7.23914	6.78585	6.06864	6.51123	5.7912	5.9426	5.80528
5.27667	7.39065	6.96328	7.1547	7.0697	6.52818	7.24004	6.78795	6.06894	6.51233	5.7912	5.9424	5.80288
5.28	7.38535	6.96108	7.1548	7.0697	6.52698	7.23814	6.78605	6.06904	6.51683	5.7893	5.9395	5.80118
5.28333	7.38455	6.96368	7.1532	7.0699	6.52838	7.23724	6.78885	6.07194	6.51523	5.7907	5.9383	5.80328
5.28667	7.38805	6.95958	7.1535	7.0718	6.52488	7.23884	6.79085	6.07454	6.51553	5.7903	5.9427	5.80078
5.29	7.39535	6.95988	7.1532	7.0733	6.52418	7.23844	6.79115	6.07824	6.51883	5.7873	5.9454	5.79958
5.29333	7.37975	6.96018	7.1542	7.0751	6.52468	7.23904	6.79215	6.07834	6.52223	5.7877	5.945	5.80098
5.29667	7.38605	6.95728	7.1538	7.0694	6.52028	7.24134	6.79345	6.08074	6.51893	5.789	5.948	5.80128
5.3	7.39045	6.95468	7.1551	7.077	6.51938	7.24004	6.79045	6.07874	6.52293	5.7893	5.9506	5.80068
5.30333	7.38375	6.95698	7.1539	7.0734	6.52258	7.23924	6.78615	6.07564	6.52533	5.7933	5.9453	5.80088
5.30667	7.38405	6.95568	7.1551	7.0719	6.52508	7.23764	6.78685	6.07524	6.52223	5.793	5.9444	5.80188
5.31	7.38995	6.95548	7.155	7.0803	6.52558	7.23624	6.78565	6.07304	6.52213	5.7928	5.944	5.80188
5.31333	7.39105	6.95918	7.1553	7.0834	6.53038	7.23474	6.78475	6.07374	6.52423	5.7932	5.946	5.80578
5.31667	7.39025	6.96168	7.1543	7.0807	6.52958	7.23594	6.78395	6.07434	6.52363	5.7933	5.9413	5.80788
5.32	7.39175	6.96198	7.1548	7.0846	6.52818	7.23624	6.78535	6.07874	6.52393	5.7911	5.9459	5.81188
5.32333	7.39275	6.96508	7.1531	7.0876	6.52488	7.23694	6.78485	6.07954	6.52433	5.7914	5.9458	5.81158
5.32667	7.39255	6.96568	7.1534	7.0849	6.52388	7.23944	6.78365	6.08184	6.52603	5.7928	5.9471	5.81168
5.33	7.39255	6.96498	7.1537	7.0882	6.52238	7.24014	6.78725	6.08224	6.52443	5.794	5.9449	5.81048
5.33333	7.38555	6.96268	7.1532	7.088	6.52348	7.24114	6.78655	6.08214	6.52493	5.7951	5.9469	5.80868
5.33667	7.38915	6.96098	7.1531	7.0882	6.52528	7.24244	6.78975	6.07754	6.52163	5.7965	5.946	5.80608
5.34	7.39105	6.96008	7.1533	7.0872	6.52998	7.24234	6.78965	6.07734	6.52113	5.7986	5.9449	5.80728
5.34333	7.39265	6.96158	7.1526	7.0828	6.52818	7.24154	6.79405	6.07814	6.51643	5.7974	5.9452	5.80928
5.34667	7.39475	6.96078	7.1526	7.084	6.53118	7.24144	6.79115	6.07574	6.51813	5.7968	5.9442	5.80888
5.35	7.40025	6.96138	7.1529	7.0787	6.52998	7.24294	6.79285	6.07674	6.51713	5.7948	5.9476	5.81058
5.35333	7.39945	6.96258	7.1535	7.0776	6.52658	7.24154	6.79115	6.08174	6.51643	5.7942	5.9468	5.81278
5.35667	7.39365	6.96068	7.1539	7.0734	6.52918	7.24254	6.79185	6.08214	6.51613	5.7942	5.9484	5.81338
5.36	7.39345	6.95908	7.1545	7.071	6.52838	7.24434	6.79045	6.08104	6.51553	5.7955	5.9471	5.81248
5.36333	7.39255	6.95948	7.1561	7.0708	6.52258	7.24414	6.78905	6.08364	6.51393	5.7963	5.9498	5.81388
5.36667	7.39145	6.96208	7.157	7.0796	6.52358	7.24354	6.79025	6.08334	6.51193	5.7972	5.949	5.81408
5.37	7.38895	6.96088	7.1573	7.0825	6.52708	7.24544	6.79355	6.08104	6.51483	5.7951	5.9516	5.81378
5.37333	7.38835	6.96138	7.1579	7.0874	6.52268	7.24544	6.79065	6.08014	6.51253	5.7933	5.9518	5.81118
5.37667	7.38695	6.95978	7.1588	7.0894	6.52628	7.24404	6.79025	6.07924	6.51283	5.794	5.9528	5.80988
5.38	7.38565	6.95918	7.1579	7.0884	6.53078	7.24464	6.79225	6.07894	6.51513	5.791	5.9523	5.80758
5.38333	7.38365	6.95728	7.1569	7.0877	6.52998	7.24444	6.79325	6.07804	6.51593	5.7901	5.9518	5.80648
5.38667	7.38405	6.95698	7.1565	7.0872	6.53058	7.24264	6.79075	6.07804	6.51933	5.7922	5.9507	5.80608
5.39	7.38855	6.95608	7.1566	7.0897	6.52968	7.24234	6.79345	6.07954	6.52453	5.7934	5.9492	5.80738
5.39333	7.39105	6.95888	7.1555	7.0928	6.52998	7.24174	6.79215	6.08034	6.52833	5.7928	5.9494	5.80888
5.39667	7.39395	6.95978	7.1565	7.0965	6.52938	7.23994	6.79205	6.08124	6.52593	5.7958	5.9485	5.81068
5.4	7.39875	6.95978	7.1589	7.0914	6.52958	7.23964	6.79065	6.08384	6.52643	5.7988	5.9506	5.80888
5.40333	7.40135	6.96098	7.1589	7.0878	6.52778	7.24024	6.79095	6.08404	6.52863	5.7989	5.9515	5.80898
5.40667	7.39575	6.96248	7.1597	7.0815	6.52888	7.23954	6.79155	6.08364	6.52493	5.7994	5.9554	5.81108
5.41	7.39245	6.96168	7.1597	7.0794	6.52518	7.24114	6.79385	6.08244	6.52633	5.7992	5.9546	5.81048
5.41333	7.39385	6.96028	7.1586	7.076	6.52838	7.24194	6.79305	6.08104	6.52803	5.7997	5.9573	5.80888
5.41667	7.39135	6.96008	7.1569	7.0768	6.52718	7.24344	6.79485	6.08084	6.53233	5.7976	5.9527	5.81268
5.42	7.38755	6.96098	7.1578	7.0774	6.52578	7.24484	6.79475	6.08004	6.52773	5.7982	5.9542	5.81218
5.42333	7.39335	6.96158	7.1565	7.0814	6.52418	7.24644	6.79425	6.08144	6.53123	5.797	5.9516	5.81138
5.42667	7.39505	6.96198	7.1566	7.0849	6.52628	7.24574	6.79265	6.08334	6.53023	5.7971	5.9555	5.81358
5.43	7.39005	6.96358	7.1581	7.0872	6.52378	7.24674	6.79735	6.08454	6.53223	5.7972	5.9501	5.81468
5.43333	7.39125	6.96438	7.1581	7.0914	6.52368	7.24634	6.79605	6.08354	6.53123	5.7982	5.9554	5.81228
5.43667	7.39775	6.96408	7.1571	7.0934	6.52528	7.24554	6.79635	6.08504	6.53283	5.7981	5.9518	5.81308
5.44	7.39645	6.96308	7.1569	7.0908	6.52838	7.24574	6.79705	6.08354	6.52933	5.7999	5.9515	5.81388
5.44333	7.39425	6.96338	7.1573	7.0866	6.52768	7.24444	6.79625	6.08474	6.53263	5.799	5.9461	5.81338
5.44667	7.39665	6.96338	7.1565	7.0846	6.52808	7.24474	6.79205	6.08314	6.52863	5.7989	5.9487	5.81228
5.45	7.39745	6.96358	7.1567	7.0838	6.53068	7.24294	6.79185	6.08194	6.52643	5.7993	5.9486	5.81228
5.45333	7.39415	6.96428	7.1579	7.0837	6.53188	7.24354	6.79115	6.08344	6.52593	5.7997	5.9478	5.81348
5.45667	7.39225	6.96518	7.1586	7.0841	6.53088	7.24274	6.78935	6.08354	6.53133	5.8007	5.9497	5.81328
5.46	7.39395	6.96378	7.1581	7.0875	6.52908	7.24444	6.78985	6.08284	6.52823	5.8031	5.9537	5.81318
5.46333	7.39205	6.96508	7.1578	7.0812	6.53168	7.24624	6.79275	6.08514	6.53173	5.8022	5.9571	5.81478
5.46667	7.39135	6.96448	7.1592	7.0785	6.53108	7.24744	6.79155	6.08774	6.53503	5.8014	5.9564	5.81618
5.47	7.39085	6.96298	7.1597	7.0848	6.53118	7.24774	6.79265	6.08914	6.53503	5.802	5.9558	5.81488
5.47333	7.39095	6.96348	7.1587	7.091	6.52778	7.24784	6.79455	6.09114	6.53483	5.7993	5.9551	5.81358
5.47667	7.38775	6.96488	7.16	7.0897	6.53118	7.24814	6.79505	6.09394	6.53523	5.7983	5.9551	5.81178
5.48	7.38605	6.96358	7.1602	7.0962	6.52738	7.24604	6.79535	6.09424	6.53503	5.7982	5.9553	5.81138
5.48333	7.38485	6.96458	7.16	7.097	6.52878	7.24704	6.79805	6.09374	6.53393	5.7998	5.9561	5.81078
5.48667	7.38575	6.96688	7.1606	7.0904	6.52888	7.24644	6.79775	6.09254	6.53033	5.7973	5.9606	5.81118
5.49	7.38605	6.96548	7.1629	7.0883	6.53078	7.24694	6.79935	6.09124	6.52983	5.7992	5.9606	5.81418
5.49333	7.38385	6.96378	7.1636	7.0849	6.53058	7.24744	6.80005	6.08654	6.53083	5.7997	5.9628	5.81768
5.49667	7.37955	6.96528	7.1644	7.0853	6.53158	7.24894	6.79785	6.08724	6.52883	5.8003	5.9619	5.81778
5.5	7.24235	6.93498	7.1419	6.7765	6.51958	6.63104	6.83765	6.20674	6.64593	6.1365	6.0975	5.74668
5.50333	7.20905	6.91438	7.0948	6.7534	6.49148	6.58494	6.78375	6.19074	6.63203	6.102	6.0826	5.71938
5.50667	7.17545	6.88588	7.0685	6.731	6.47318	6.56114	6.75795	6.17864	6.62053	6.0865	6.0494	5.69508
5.51	7.15655	6.86928	7.0458	6.7099	6.47198	6.53484	6.73265	6.14984	6.60083	6.0661	6.0259	5.67968
5.51333	7.12305	6.84848	7.0304	6.6947	6.44228	6.51584	6.70655	6.12694	6.58733	6.0448	6.014	5.66128
5.51667	7.09905	6.82968	7.0045	6.6775	6.42478	6.49044	6.68105	6.11224	6.57253	6.0267	5.9903	5.64308
5.52	7.07955	6.80498	6.9866	6.6598	6.40908	6.47624	6.66255	6.09624	6.55493	6.0076	5.9695	5.62788
5.52333	7.06705	6.78808	6.9707	6.6447	6.39438	6.46074	6.64645	6.08014	6.53753	5.9922	5.9542	5.61358
5.52667	7.04745	6.77008	6.9542	6.6316	6.37648	6.44844	6.63205	6.07034	6.52143	5.9789	5.9394	5.60158
5.53	7.03845	6.75588	6.937	6.6205	6.36918	6.43454	6.61835	6.05934	6.50523	5.9667	5.9222	5.58728
5.53333	7.02785	6.73958	6.922	6.6066	6.35768	6.41984	6.60445	6.05024	6.48963	5.9522	5.9102	5.57408
5.53667	7.00925	6.72468	6.9062	6.5932	6.34608	6.40804	6.59145	6.03664	6.47523	5.9436	5.8928	5.55968
5.54	6.99365	6.71118	6.8913	6.5841	6.33368	6.39624	6.57895	6.02524	6.45773	5.9342	5.8799	5.54798
5.54333	6.98535	6.69718	6.879	6.575	6.32788	6.38384	6.56485	6.01724	6.44813	5.9223	5.8675	5.53748
5.54667	6.96965	6.68228	6.8677	6.563	6.31658	6.37514	6.55285	6.00964	6.43643	5.9127	5.8552	5.53158
5.55	6.95835	6.67078	6.8567	6.5523	6.30648	6.36554	6.54005	5.99734	6.42543	5.903	5.8445	5.52438
5.55333	6.95035	6.66488	6.8445	6.5425	6.29508	6.35554	6.52855	5.98954	6.41193	5.8927	5.837	5.51788
5.55667	6.93995	6.65328	6.8343	6.533	6.28808	6.34674	6.51695	5.98034	6.40353	5.8808	5.8261	5.51288
5.56	6.93045	6.64478	6.8229	6.5235	6.27608	6.33954	6.50725	5.96774	6.38653	5.8713	5.8158	5.50388
5.56333	6.92685	6.63858	6.8128	6.5168	6.26678	6.33034	6.49815	5.95994	6.37533	5.8623	5.8086	5.49528
5.56667	6.91305	6.63008	6.8004	6.5084	6.26028	6.31944	6.48805	5.95254	6.36263	5.8532	5.7983	5.48618
5.57	6.90735	6.61798	6.788	6.5031	6.25438	6.31014	6.47695	5.94614	6.35153	5.8426	5.7879	5.47868
5.57333	6.89715	6.60798	6.7775	6.4952	6.24388	6.30334	6.46825	5.94044	6.34043	5.8345	5.7805	5.47178
5.57667	6.88665	6.59948	6.7691	6.4871	6.24038	6.29404	6.45845	5.93124	6.33543	5.8259	5.7723	5.46568
5.58	6.87355	6.58668	6.758	6.4787	6.22758	6.28634	6.44765	5.92464	6.32573	5.816	5.7644	5.46038
5.58333	6.86775	6.57528	6.7491	6.471	6.21988	6.27894	6.43715	5.91404	6.31733	5.807	5.7555	5.45528
5.58667	6.85565	6.56598	6.7396	6.4614	6.21048	6.27254	6.42765	5.90644	6.30813	5.7996	5.7458	5.44828
5.59	6.84795	6.55858	6.7286	6.4504	6.20168	6.26334	6.41815	5.89814	6.30423	5.7923	5.7379	5.44058
5.59333	6.84175	6.55058	6.7182	6.4395	6.18978	6.25604	6.41095	5.89174	6.29383	5.7836	5.7285	5.43548
5.59667	6.83095	6.54278	6.7083	6.4282	6.18628	6.24874	6.40275	5.88004	6.28583	5.7755	5.719	5.42768
5.6	6.82325	6.53328	6.699	6.4196	6.17828	6.24304	6.39445	5.87404	6.27783	5.7694	5.7111	5.42008
5.60333	6.81345	6.52448	6.6882	6.4149	6.16918	6.23464	6.38705	5.86644	6.26983	5.7613	5.706	5.41188
5.60667	6.80675	6.51438	6.6809	6.4118	6.16348	6.22684	6.37815	5.85964	6.26023	5.7529	5.6965	5.40578
5.61	6.79675	6.50448	6.6728	6.4069	6.15648	6.21954	6.37045	5.85264	6.25313	5.7471	5.6897	5.39838
5.61333	6.78765	6.49588	6.664	6.3989	6.14908	6.21164	6.36235	5.84454	6.24433	5.7397	5.6815	5.39288
5.61667	6.78055	6.48988	6.6545	6.3924	6.14068	6.20254	6.35105	5.83904	6.23643	5.7312	5.6748	5.38738
5.62	6.77475	6.47358	6.6459	6.3805	6.13348	6.19454	6.34225	5.83294	6.22853	5.7211	5.6647	5.38128
5.62333	6.76565	6.46708	6.6365	6.3671	6.12498	6.18874	6.33515	5.82534	6.21973	5.7142	5.6564	5.37558
5.62667	6.75805	6.45608	6.6255	6.3575	6.11668	6.18154	6.32605	5.81894	6.21143	5.7066	5.648	5.37048
5.63	6.75155	6.44608	6.6169	6.3536	6.10828	6.17384	6.31685	5.81494	6.20443	5.6994	5.6378	5.36358
5.63333	6.74125	6.43428	6.6079	6.343	6.10128	6.16764	6.31315	5.80594	6.19483	5.6913	5.6304	5.35668
5.63667	6.72785	6.42838	6.596	6.3351	6.09108	6.15784	6.30525	5.79754	6.18403	5.6836	5.6261	5.35008
5.64	6.71775	6.41888	6.5842	6.3295	6.08638	6.15114	6.29775	5.78944	6.17593	5.6752	5.6179	5.34528
5.64333	6.70985	6.41258	6.5746	6.324	6.07998	6.14394	6.28925	5.78204	6.16813	5.6686	5.6136	5.33908
5.64667	6.70375	6.40378	6.5639	6.3154	6.07308	6.13884	6.28335	5.77174	6.15813	5.6621	5.6087	5.33388
5.65	6.69675	6.39698	6.5541	6.3094	6.06528	6.13094	6.27405	5.76564	6.15243	5.6558	5.6027	5.32878
5.65333	6.68735	6.39048	6.5442	6.3004	6.05878	6.12604	6.26585	5.76014	6.14323	5.6528	5.595	5.32268
5.65667	6.68065	6.38348	6.5369	6.2962	6.05158	6.11834	6.25705	5.75584	6.13553	5.6488	5.5894	5.31578
5.66	6.67205	6.37718	6.5294	6.2903	6.04348	6.11134	6.24775	5.74754	6.12743	5.6431	5.5807	5.30888
5.66333	6.66145	6.37118	6.5219	6.2864	6.03608	6.10364	6.23905	5.74294	6.12083	5.6364	5.5707	5.30138
5.66667	6.65205	6.36148	6.5132	6.2785	6.02988	6.09824	6.23165	5.73654	6.11113	5.6298	5.5623	5.29688
5.67	6.64495	6.34848	6.5056	6.2717	6.01898	6.08734	6.22465	5.72704	6.10403	5.6206	5.5552	5.29148
5.67333	6.63655	6.33588	6.4983	6.259	6.01368	6.07984	6.21595	5.71854	6.09753	5.6131	5.5492	5.28518
5.67667	6.62675	6.32698	6.4887	6.2511	6.00648	6.07284	6.20905	5.71324	6.09153	5.6065	5.543	5.28058
5.68	6.61905	6.31758	6.4797	6.2429	5.99798	6.06674	6.20305	5.70644	6.08453	5.6016	5.5403	5.27658
5.68333	6.61165	6.30868	6.4718	6.2336	5.99098	6.05924	6.19645	5.69944	6.08093	5.5942	5.5345	5.27028
5.68667	6.60095	6.30128	6.4622	6.2213	5.98618	6.05164	6.18755	5.69334	6.07293	5.5884	5.5279	5.26348
5.69	6.59165	6.29368	6.452	6.217	5.97708	6.04494	6.18365	5.68894	6.06583	5.5827	5.5188	5.25868
5.69333	6.58905	6.28118	6.4435	6.2041	5.96998	6.03794	6.17805	5.67994	6.05793	5.5754	5.5135	5.25318
5.69667	6.58395	6.27058	6.4344	6.1945	5.96408	6.03054	6.17085	5.67294	6.05303	5.5693	5.5074	5.24718
5.7	6.57235	6.26018	6.4254	6.1904	5.95358	6.02444	6.16245	5.66494	6.04363	5.5638	5.5023	5.24248
5.70333	6.56025	6.24888	6.4163	6.1921	5.95018	6.01824	6.15395	5.65894	6.03313	5.5565	5.4961	5.23718
5.70667	6.55825	6.23988	6.4089	6.1849	5.94348	6.01324	6.14465	5.65104	6.02593	5.5498	5.4946	5.23338
5.71	6.54595	6.23168	6.4007	6.1833	5.93588	6.00774	6.13915	5.64724	6.01753	5.5431	5.4879	5.22838
5.71333	6.53665	6.22178	6.3924	6.174	5.92608	6.00114	6.13225	5.64074	6.01133	5.5364	5.4792	5.22468
5.71667	6.53245	6.21378	6.3834	6.1653	5.92328	5.99384	6.12625	5.63734	6.00403	5.5325	5.4724	5.21948
5.72	6.52545	6.20508	6.3746	6.1548	5.91308	5.98844	6.11995	5.62934	5.99893	5.5277	5.4641	5.21318
5.72333	6.51275	6.19668	6.366	6.1466	5.90438	5.98064	6.11205	5.62404	5.99183	5.5238	5.4566	5.20758
5.72667	6.50795	6.18608	6.3563	6.1408	5.90018	5.97404	6.10335	5.62094	5.98453	5.5174	5.4499	5.20058
5.73	6.50055	6.17798	6.3484	6.1383	5.89718	5.96674	6.09535	5.61594	5.97343	5.5139	5.4424	5.19508
5.73333	6.49195	6.16758	6.3415	6.1301	5.89078	5.95984	6.08925	5.60884	5.96743	5.5094	5.4381	5.18958
5.73667	6.48605	6.15608	6.3318	6.1209	5.88388	5.95234	6.08145	5.60814	5.96193	5.5009	5.4339	5.18408
5.74	6.47805	6.14738	6.3235	6.1156	5.87908	5.94734	6.07565	5.60204	5.95493	5.4925	5.428	5.17808
5.74333	6.46805	6.14048	6.3169	6.1075	5.87128	5.93954	6.06995	5.59294	5.95003	5.4888	5.419	5.17498
5.74667	6.46065	6.13348	6.3079	6.0983	5.86458	5.93174	6.06435	5.58554	5.94563	5.4817	5.4157	5.17048
5.75	6.45235	6.12738	6.2992	6.0927	5.85778	5.92564	6.05755	5.57834	5.93823	5.4763	5.4074	5.16598
5.75333	6.44475	6.11908	6.2929	6.0844	5.84968	5.91964	6.04835	5.57044	5.92983	5.4691	5.401	5.16148
5.75667	6.43635	6.10968	6.284	6.0769	5.84388	5.91064	6.04265	5.56174	5.91993	5.4648	5.3954	5.15608
5.76	6.42935	6.10258	6.2766	6.0718	5.83418	5.90614	6.03575	5.55564	5.91143	5.4585	5.3908	5.15218
5.76333	6.42395	6.09278	6.2703	6.0669	5.82758	5.89994	6.02865	5.54924	5.90393	5.4528	5.3845	5.14678
5.76667	6.42115	6.08538	6.2639	6.0601	5.81828	5.89304	6.02255	5.54424	5.89803	5.4444	5.3793	5.14238
5.77	6.41555	6.07818	6.2544	6.0534	5.81388	5.88474	6.01545	5.53614	5.89273	5.4412	5.3723	5.13838
5.77333	6.40925	6.07008	6.2473	6.0493	5.80668	5.87904	6.00985	5.53264	5.89033	5.435	5.3671	5.13308
5.77667	6.40185	6.06118	6.2393	6.039	5.80298	5.87104	6.00455	5.52574	5.88603	5.4302	5.3623	5.12778
5.78	6.39315	6.05438	6.2316	6.0312	5.79548	5.86654	5.99965	5.52114	5.88163	5.4234	5.3574	5.12268
5.78333	6.38285	6.04738	6.2239	6.0286	5.79218	5.86064	5.99305	5.51704	5.87583	5.4173	5.3484	5.11688
5.78667	6.37105	6.04008	6.2182	6.0231	5.78298	5.85514	5.98755	5.51294	5.86743	5.4093	5.3434	5.10968
5.79	6.36515	6.03418	6.2122	6.0176	5.77818	5.84884	5.98075	5.50734	5.86103	5.4045	5.3371	5.10668
5.79333	6.35945	6.02858	6.2073	6.0121	5.77078	5.84284	5.97405	5.50094	5.85373	5.4004	5.3305	5.10088
5.79667	6.35375	6.02248	6.2023	6.0056	5.76548	5.83644	5.96785	5.49564	5.84703	5.3956	5.321	5.09568
5.8	6.34505	6.01358	6.1986	5.9997	5.75628	5.83104	5.96135	5.48914	5.83963	5.3891	5.3159	5.09318
5.80333	6.33785	6.00618	6.1938	5.9957	5.74998	5.82164	5.95435	5.48204	5.83433	5.3846	5.3104	5.08758
5.80667	6.33025	5.99958	6.1925	5.9841	5.74178	5.81684	5.94755	5.47644	5.82703	5.3807	5.3025	5.08278
5.81	6.32165	5.98888	6.1886	5.9762	5.73638	5.81074	5.94265	5.47074	5.82003	5.3726	5.2959	5.07788
5.81333	6.31005	5.97968	6.1861	5.9686	5.72858	5.80334	5.93575	5.46564	5.81283	5.3663	5.292	5.07548
5.81667	6.30685	5.97268	6.1835	5.9614	5.72468	5.79654	5.93105	5.45894	5.80503	5.3621	5.2889	5.06718
5.82	6.30035	5.96238	6.18	5.954	5.71658	5.79144	5.92475	5.45284	5.79503	5.3564	5.2824	5.06388
5.82333	6.29045	5.95498	6.1759	5.95	5.71218	5.78404	5.91925	5.44554	5.79003	5.3487	5.2774	5.05748
5.82667	6.28025	5.95008	6.1734	5.9474	5.70608	5.77864	5.91175	5.44094	5.78533	5.3422	5.2736	5.05318
5.83	6.27555	5.94418	6.1682	5.9397	5.70198	5.77404	5.90575	5.43544	5.78053	5.3385	5.2698	5.04708
5.83333	6.26785	5.93778	6.1608	5.9311	5.69548	5.76854	5.89785	5.42924	5.77713	5.3342	5.2645	5.04408
5.83667	6.26295	5.93318	6.1576	5.9208	5.69028	5.76054	5.89305	5.42564	5.76943	5.3284	5.2585	5.03728
5.84	6.26015	5.92538	6.1515	5.9149	5.68368	5.75624	5.88735	5.41994	5.76163	5.3234	5.2527	5.03458
5.84333	6.25665	5.92098	6.1435	5.9105	5.67828	5.74904	5.88015	5.41324	5.75363	5.3195	5.2431	5.02988
5.84667	6.24805	5.91238	6.137	5.9055	5.67288	5.74214	5.87385	5.40594	5.74483	5.3153	5.2367	5.02508
5.85	6.24025	5.90658	6.1317	5.902	5.66738	5.73564	5.86605	5.40164	5.73913	5.3103	5.2293	5.02078
5.85333	6.22925	5.89898	6.1186	5.8933	5.65948	5.73234	5.85795	5.39624	5.73623	5.3037	5.223	5.01858
5.85667	6.22295	5.89268	6.1085	5.8872	5.65248	5.72334	5.85095	5.39174	5.73313	5.2977	5.2159	5.01358
5.86	6.21575	5.88208	6.1026	5.8776	5.64798	5.71754	5.84395	5.38774	5.73093	5.295	5.2125	5.00958
5.86333	6.20635	5.87378	6.0937	5.8702	5.64188	5.71124	5.83765	5.38274	5.72553	5.2891	5.209	5.00588
5.86667	6.19615	5.86538	6.0838	5.8637	5.63418	5.70524	5.83265	5.37744	5.71743	5.282	5.2076	5.00068
5.87	6.19025	5.85798	6.0785	5.8549	5.62818	5.69774	5.82475	5.37084	5.71333	5.2751	5.2024	4.99328
5.87333	6.18375	5.84888	6.074	5.8462	5.62328	5.69414	5.81795	5.36494	5.70483	5.2707	5.2006	4.98868
5.87667	6.17495	5.84338	6.067	5.8454	5.61728	5.68864	5.81155	5.35754	5.69693	5.2664	5.1936	4.98268
5.88	6.17165	5.84088	6.0616	5.8367	5.61078	5.68124	5.80545	5.35304	5.69243	5.2604	5.1872	4.97848
5.88333	6.16675	5.83458	6.0569	5.8268	5.60708	5.67464	5.80045	5.34764	5.68883	5.2584	5.1811	4.97468
5.88667	6.16115	5.82728	6.0476	5.8288	5.60108	5.66904	5.79305	5.34334	5.68203	5.253	5.1743	4.97298
5.89	6.15295	5.82308	6.0416	5.8268	5.59498	5.66224	5.78725	5.33794	5.67863	5.2469	5.1682	4.96918
5.89333	6.14795	5.81538	6.0336	5.817	5.58778	5.65504	5.78165	5.33314	5.67283	5.2403	5.1676	4.96538
5.89667	6.14035	5.80448	6.0258	5.8164	5.58038	5.64984	5.77605	5.32674	5.66973	5.2363	5.162	4.96078
5.9	6.13555	5.79668	6.0201	5.8122	5.57308	5.64444	5.77065	5.32334	5.66323	5.23	5.1556	4.95598
5.90333	6.12665	5.78758	6.0111	5.8025	5.56668	5.63574	5.76795	5.31714	5.65563	5.2268	5.1512	4.95008
5.90667	6.11895	5.78028	6	5.7954	5.55978	5.63014	5.76255	5.31124	5.65053	5.221	5.1436	4.94458
5.91	6.11365	5.77448	5.9923	5.7912	5.55198	5.62564	5.75625	5.30914	5.64363	5.2176	5.1349	4.94018
5.91333	6.11155	5.76928	5.982	5.7856	5.54688	5.62154	5.75045	5.30484	5.63633	5.2125	5.127	4.93518
5.91667	6.10645	5.76458	5.9715	5.7771	5.54248	5.61594	5.74385	5.29754	5.63153	5.209	5.1227	4.93018
5.92	6.10095	5.75658	5.9678	5.7743	5.53688	5.61004	5.73495	5.29324	5.62633	5.1996	5.1199	4.92508
5.92333	6.09375	5.74838	5.9646	5.7661	5.52928	5.60334	5.72995	5.28814	5.61963	5.1964	5.1163	4.92178
5.92667	6.08735	5.74228	5.9584	5.7541	5.52628	5.59854	5.72585	5.28014	5.61483	5.1893	5.1127	4.91938
5.93	6.07595	5.73688	5.9546	5.7489	5.52338	5.59204	5.72035	5.27234	5.60653	5.1836	5.106	4.91488
5.93333	6.06675	5.72988	5.9474	5.7427	5.51818	5.58584	5.71415	5.26874	5.60013	5.1759	5.1004	4.91188
5.93667	6.05355	5.72518	5.9376	5.7326	5.51428	5.58164	5.70675	5.26234	5.59363	5.1725	5.0938	4.90658
5.94	6.04475	5.72168	5.9283	5.7289	5.51138	5.57694	5.69985	5.26044	5.58543	5.1681	5.0881	4.90238
5.94333	6.03575	5.71418	5.9206	5.7244	5.50428	5.56964	5.69295	5.25634	5.57993	5.1633	5.0841	4.89658
5.94667	6.03215	5.70838	5.9162	5.7167	5.49268	5.56424	5.68635	5.25324	5.57503	5.1585	5.0841	4.89338
5.95	6.02435	5.70088	5.9097	5.7123	5.48718	5.55764	5.68055	5.24714	5.56943	5.1537	5.0791	4.88868
5.95333	6.02185	5.69368	5.8998	5.7067	5.47938	5.55434	5.67575	5.24334	5.56613	5.1515	5.0731	4.88578
5.95667	6.01925	5.68358	5.8925	5.7025	5.47388	5.54874	5.67025	5.23814	5.56273	5.1472	5.0679	4.88018
5.96	6.01325	5.67728	5.8833	5.6972	5.46868	5.54414	5.66435	5.23174	5.55713	5.1415	5.0643	4.87588
5.96333	6.00465	5.66968	5.8749	5.6897	5.46518	5.53844	5.66045	5.22884	5.55263	5.1367	5.0562	4.86978
5.96667	6.00045	5.66398	5.8705	5.6808	5.45778	5.53394	5.65425	5.22144	5.54623	5.1336	5.0498	4.86618
5.97	5.99615	5.65558	5.8636	5.6792	5.45398	5.52464	5.65015	5.21614	5.53833	5.1284	5.0455	4.85998
5.97333	5.98925	5.65208	5.8537	5.6738	5.44778	5.51794	5.64715	5.21094	5.53153	5.1223	5.0419	4.85588
5.97667	5.98395	5.64808	5.8468	5.6647	5.44148	5.51264	5.64365	5.20764	5.52673	5.1181	5.0326	4.85258
5.98	5.97755	5.64338	5.8383	5.6657	5.43858	5.50674	5.63685	5.20074	5.52133	5.1122	5.0265	4.84918
5.98333	5.97105	5.63708	5.8303	5.6637	5.43608	5.50094	5.63165	5.19884	5.51773	5.1064	5.0233	4.84498
5.98667	5.96115	5.63088	5.8253	5.653	5.42738	5.49634	5.62495	5.19334	5.51163	5.1011	5.0191	4.84168
5.99	5.95195	5.62488	5.8211	5.6434	5.42168	5.48864	5.61765	5.18604	5.50693	5.0953	5.0137	4.83908
5.99333	5.94695	5.61798	5.816	5.6409	5.41708	5.48224	5.61155	5.17924	5.50023	5.088	5.0092	4.83648
5.99667	5.94085	5.61168	5.8072	5.6307	5.41168	5.47534	5.60655	5.17534	5.49353	5.0852	5.0065	4.83258
6	5.93365	5.60598	5.7984	5.6253	5.40138	5.46974	5.60305	5.16984	5.48643	5.0807	5.0043	4.82748
6.00333	5.92415	5.60228	5.7889	5.6213	5.39558	5.46224	5.59615	5.16414	5.48293	5.0753	4.9994	4.82208
6.00667	5.92295	5.59668	5.7825	5.6128	5.39598	5.45744	5.59095	5.16074	5.47963	5.073	4.9944	4.81698
6.01	5.91515	5.58898	5.7749	5.6116	5.38978	5.45064	5.58345	5.15594	5.47803	5.0729	4.9903	4.80978
6.01333	5.90815	5.58178	5.7686	5.6065	5.37698	5.44734	5.57625	5.14964	5.47403	5.0662	4.9835	4.80608
6.01667	5.90275	5.57528	5.7606	5.6004	5.37668	5.44134	5.56745	5.14294	5.46983	5.0621	4.9732	4.80038
6.02	5.90155	5.56728	5.758	5.5896	5.37138	5.43574	5.56335	5.13924	5.46223	5.055	4.9661	4.79698
6.02333	5.89135	5.55868	5.7471	5.5881	5.35658	5.43104	5.55525	5.13404	5.45553	5.0482	4.9601	4.79258
6.02667	5.88725	5.55268	5.7393	5.5774	5.35028	5.42674	5.54905	5.12854	5.44923	5.0402	4.9564	4.79098
6.03	5.88445	5.54758	5.7341	5.5713	5.34918	5.42104	5.54445	5.12234	5.44363	5.0373	4.9533	4.78798
6.03333	5.87505	5.54318	5.7292	5.5641	5.34298	5.41594	5.54065	5.12064	5.43683	5.0311	4.9522	4.78568
6.03667	5.86875	5.53588	5.7191	5.5595	5.33938	5.40804	5.53225	5.11464	5.43003	5.0313	4.9497	4.78078
6.04	5.86325	5.53128	5.7143	5.5541	5.33618	5.40374	5.52805	5.10954	5.42493	5.029	4.9455	4.77728
6.04333	5.85715	5.52648	5.707	5.5478	5.33228	5.39764	5.52645	5.10664	5.41723	5.0278	4.9409	4.77108
6.04667	5.85005	5.51918	5.6995	5.5415	5.32738	5.39324	5.52165	5.10244	5.40953	5.022	4.9372	4.76468
6.05	5.84525	5.51148	5.6934	5.537	5.32038	5.38834	5.51635	5.09534	5.40413	5.0172	4.9331	4.76018
6.05333	5.83515	5.50568	5.6862	5.5313	5.31228	5.38474	5.50895	5.09014	5.39913	5.0103	4.926	4.75488
6.05667	5.82845	5.49868	5.6801	5.5245	5.30908	5.37884	5.50195	5.08694	5.39013	5.0041	4.9235	4.75038
6.06	5.81685	5.49258	5.6756	5.5205	5.30438	5.37474	5.49405	5.07924	5.38473	4.9995	4.9175	4.74668
6.06333	5.80765	5.48868	5.6681	5.5151	5.30018	5.36784	5.48775	5.07484	5.38173	4.9967	4.9081	4.74288
6.06667	5.80415	5.48478	5.6598	5.5073	5.29618	5.36144	5.48075	5.07054	5.37673	4.992	4.9013	4.73868
6.07	5.79705	5.47688	5.6548	5.5002	5.29278	5.35434	5.47915	5.06944	5.37203	4.9861	4.8993	4.73708
6.07333	5.79005	5.47188	5.6461	5.4963	5.28538	5.34904	5.47475	5.06384	5.37103	4.9835	4.892	4.73268
6.07667	5.78675	5.46628	5.6409	5.4931	5.28248	5.34304	5.46935	5.05894	5.36833	4.977	4.8894	4.73008
6.08	5.78455	5.45988	5.6354	5.486	5.27888	5.33904	5.46395	5.05394	5.36443	4.97	4.8893	4.72798
6.08333	5.77895	5.45268	5.6297	5.4829	5.27338	5.33394	5.46085	5.05014	5.36203	4.9696	4.8842	4.72568
6.08667	5.77605	5.44758	5.6215	5.4766	5.26518	5.32954	5.45185	5.04284	5.35733	4.9628	4.8766	4.71978
6.09	5.77495	5.44218	5.6137	5.4701	5.26198	5.32504	5.44635	5.03834	5.34873	4.9565	4.8731	4.71628
6.09333	5.76885	5.43628	5.6052	5.4625	5.25498	5.32074	5.44145	5.03514	5.34223	4.9518	4.8674	4.71138
6.09667	5.75885	5.42898	5.5996	5.4581	5.24808	5.31404	5.43685	5.03134	5.33663	4.9477	4.8625	4.70648
6.1	5.75055	5.42308	5.5938	5.4523	5.24008	5.30954	5.43115	5.02414	5.32963	4.9396	4.8598	4.70188
6.10333	5.74545	5.41658	5.585	5.448	5.23518	5.30334	5.42925	5.02004	5.32203	4.936	4.8574	4.69788
6.10667	5.73765	5.41018	5.5778	5.4451	5.22758	5.29724	5.42335	5.01614	5.32163	4.932	4.8549	4.69338
6.11	5.72875	5.40338	5.5695	5.4383	5.21998	5.29044	5.41955	5.01384	5.31583	4.9293	4.8491	4.68888
6.11333	5.72765	5.39668	5.5628	5.4336	5.21538	5.28464	5.41605	5.00824	5.30943	4.9274	4.8419	4.68328
6.11667	5.72475	5.39108	5.5559	5.4284	5.21128	5.27914	5.41105	5.00464	5.30313	4.9221	4.8354	4.67928
6.12	5.71585	5.38488	5.5528	5.4241	5.20758	5.27564	5.40205	5.00174	5.30003	4.9166	4.8297	4.67628
6.12333	5.70685	5.37878	5.5449	5.417	5.20488	5.26884	5.39855	4.99614	5.29073	4.9127	4.825	4.67338
6.12667	5.70555	5.37178	5.5418	5.4137	5.20218	5.26354	5.39095	4.98624	5.28673	4.908	4.8212	4.67138
6.13	5.69945	5.36748	5.5364	5.4075	5.19688	5.25944	5.38395	4.98414	5.28423	4.9025	4.8185	4.66908
6.13333	5.69265	5.36138	5.5297	5.4023	5.19348	5.25554	5.37765	4.98014	5.28183	4.8996	4.8157	4.66578
6.13667	5.68285	5.35468	5.523	5.3942	5.18628	5.24984	5.37445	4.97334	5.27763	4.8965	4.8122	4.66048
6.14	5.67915	5.34898	5.5186	5.3897	5.17888	5.24574	5.36865	4.96844	5.27393	4.8943	4.8055	4.65768
6.14333	5.67025	5.34468	5.5087	5.3824	5.17178	5.24194	5.36565	4.96744	5.27003	4.8887	4.8002	4.65338
6.14667	5.66245	5.33838	5.502	5.3769	5.16568	5.23574	5.36245	4.95934	5.26523	4.8855	4.7953	4.64958
6.15	5.65365	5.33358	5.498	5.3697	5.15768	5.22994	5.35905	4.95584	5.26163	4.8827	4.7899	4.64358
6.15333	5.65285	5.32898	5.4911	5.3711	5.15208	5.22354	5.35285	4.95034	5.25723	4.8778	4.7871	4.64088
6.15667	5.64945	5.32258	5.485	5.3579	5.14728	5.21824	5.35045	4.94764	5.24773	4.8725	4.7848	4.63598
6.16	5.64635	5.31588	5.4769	5.3599	5.14228	5.21294	5.34705	4.94134	5.24113	4.8683	4.7825	4.63108
6.16333	5.64335	5.31098	5.4681	5.354	5.13998	5.20814	5.34035	4.93944	5.23743	4.8624	4.7793	4.62678
6.16667	5.63985	5.30218	5.4572	5.3498	5.13878	5.20134	5.33455	4.93484	5.23123	4.8558	4.7749	4.62438
6.17	5.62575	5.29558	5.4513	5.3407	5.13628	5.19654	5.33075	4.93014	5.22603	4.8509	4.7706	4.61868
6.17333	5.61505	5.29048	5.4447	5.3429	5.13218	5.18924	5.32375	4.92534	5.22453	4.846	4.7653	4.61458
6.17667	5.60835	5.28628	5.4426	5.3318	5.12908	5.18494	5.31745	4.92104	5.21963	4.8438	4.7606	4.61168
6.18	5.60005	5.27968	5.4393	5.3289	5.12328	5.18024	5.31325	4.91704	5.21403	4.8398	4.7548	4.60668
6.18333	5.59475	5.27628	5.4335	5.3241	5.11118	5.17624	5.30825	4.91194	5.20743	4.8379	4.7494	4.60348
6.18667	5.59585	5.27008	5.4271	5.3171	5.10218	5.17004	5.29985	4.90644	5.20103	4.8339	4.7448	4.60008
6.19	5.59255	5.26498	5.4222	5.314	5.09418	5.16604	5.29625	4.90154	5.19613	4.8306	4.7421	4.59448
6.19333	5.59125	5.26048	5.4171	5.3089	5.08848	5.15934	5.29145	4.89934	5.19163	4.8237	4.7378	4.58978
6.19667	5.58075	5.25618	5.4088	5.3034	5.08288	5.15424	5.28635	4.89304	5.18503	4.8195	4.7362	4.58728
6.2	5.57455	5.25108	5.4053	5.2988	5.08298	5.14914	5.28145	4.88834	5.18143	4.8147	4.7335	4.58308
6.20333	5.56995	5.24738	5.3998	5.2884	5.08068	5.14614	5.27815	4.88614	5.17623	4.8084	4.7294	4.57898
6.20667	5.55995	5.23978	5.3914	5.2804	5.07558	5.13964	5.27125	4.88274	5.16893	4.8007	4.724	4.57768
6.21	5.54945	5.23438	5.3842	5.2775	5.06598	5.13624	5.26445	4.87584	5.16433	4.7995	4.7217	4.57478
6.21333	5.54765	5.22788	5.3791	5.2717	5.05778	5.13114	5.25995	4.87414	5.16173	4.7948	4.7181	4.57188
6.21667	5.54095	5.22328	5.3737	5.2684	5.05638	5.12574	5.25625	4.86884	5.15723	4.791	4.7131	4.56878
6.22	5.53295	5.21708	5.368	5.2664	5.05258	5.12004	5.25005	4.86524	5.15413	4.7883	4.7097	4.56688
6.22333	5.53405	5.21368	5.3587	5.2625	5.04908	5.11554	5.24455	4.85894	5.15183	4.7867	4.7066	4.56158
6.22667	5.52885	5.20638	5.3536	5.2559	5.04828	5.11124	5.24145	4.85604	5.14893	4.7819	4.7017	4.55688
6.23	5.52325	5.20138	5.3492	5.2491	5.04688	5.10594	5.23615	4.85024	5.14323	4.7759	4.6961	4.55278
6.23333	5.51705	5.19458	5.3409	5.2437	5.03788	5.10284	5.22985	4.84584	5.13973	4.7715	4.6936	4.54748
6.23667	5.51195	5.18738	5.3356	5.2386	5.03218	5.09884	5.22415	4.84184	5.13373	4.7672	4.6889	4.54188
6.24	5.50635	5.18128	5.3332	5.2335	5.02558	5.09374	5.22035	4.83714	5.12653	4.7606	4.6836	4.53778
6.24333	5.50145	5.17658	5.3221	5.2291	5.02208	5.08534	5.21345	4.83404	5.12113	4.7567	4.6778	4.53598
6.24667	5.49805	5.17058	5.3145	5.2256	5.01628	5.08074	5.20775	4.82864	5.11273	4.7559	4.6729	4.53178
6.25	5.49425	5.16638	5.3105	5.221	5.00918	5.07534	5.20285	4.82494	5.10453	4.7536	4.6663	4.53048
6.25333	5.48635	5.16138	5.303	5.2186	5.00338	5.07014	5.19925	4.82094	5.10103	4.7505	4.6638	4.52748
6.25667	5.47965	5.15568	5.2924	5.2114	4.99508	5.06494	5.19405	4.81664	5.09383	4.7479	4.6599	4.52488
6.26	5.47665	5.15218	5.2916	5.2082	4.98768	5.06194	5.19025	4.81114	5.08743	4.74	4.656	4.52108
6.26333	5.46895	5.14908	5.2827	5.2039	4.98488	5.05754	5.18655	4.80964	5.08543	4.7367	4.6517	4.51788
6.26667	5.46305	5.14348	5.2776	5.2016	4.98488	5.05184	5.18175	4.80244	5.08213	4.7312	4.6475	4.51228
6.27	5.45395	5.13858	5.2723	5.1891	4.98228	5.04724	5.17595	4.79714	5.07753	4.7246	4.6412	4.50988
6.27333	5.44855	5.13458	5.2692	5.1905	4.98218	5.04224	5.17385	4.79434	5.07473	4.7188	4.636	4.50528
6.27667	5.44135	5.12698	5.2616	5.1795	4.98068	5.03764	5.16995	4.78914	5.07123	4.7165	4.6331	4.50078
6.28	5.43795	5.11928	5.2567	5.1765	4.97308	5.03494	5.16435	4.78324	5.06623	4.7092	4.6296	4.49728
6.28333	5.43275	5.11218	5.2517	5.1704	4.96468	5.03134	5.15925	4.78144	5.06223	4.7036	4.6293	4.49508
6.28667	5.42995	5.10768	5.2448	5.1711	4.95788	5.02454	5.15375	4.77584	5.05793	4.7	4.624	4.49008
6.29	5.42055	5.10108	5.238	5.1594	4.95048	5.01854	5.14885	4.77204	5.04983	4.6944	4.6225	4.48778
6.29333	5.41265	5.09728	5.2331	5.1562	4.94538	5.01524	5.14525	4.76724	5.04383	4.6918	4.619	4.48508
6.29667	5.40545	5.09378	5.2301	5.1505	4.94308	5.00764	5.14135	4.76524	5.03823	4.6887	4.6144	4.48178
6.3	5.39895	5.08978	5.2224	5.1434	4.94128	5.00094	5.13695	4.76034	5.03243	4.6841	4.6063	4.47778
6.30333	5.39565	5.08448	5.2176	5.135	4.93718	4.99654	5.13295	4.75744	5.02573	4.6796	4.6055	4.47298
6.30667	5.39055	5.07788	5.2111	5.1318	4.93258	4.99214	5.12675	4.75174	5.02223	4.6782	4.5989	4.46758
6.31	5.38745	5.07078	5.2034	5.1289	4.92668	4.98564	5.12155	4.75064	5.01783	4.6735	4.5927	4.46268
6.31333	5.38825	5.06538	5.1969	5.1232	4.92028	4.98244	5.11545	4.74404	5.01383	4.6692	4.5904	4.45798
6.31667	5.37935	5.06078	5.1889	5.116	4.91298	4.97624	5.11125	4.74224	5.00883	4.6664	4.5887	4.45368
6.32	5.36865	5.05378	5.1829	5.1148	4.91018	4.97254	5.10765	4.73904	5.00543	4.6614	4.5839	4.45178
6.32333	5.37275	5.04918	5.177	5.1093	4.90398	4.96664	5.10325	4.73434	5.00533	4.6569	4.5833	4.44878
6.32667	5.36365	5.04668	5.1688	5.1032	4.90298	4.96254	5.09895	4.72904	5.00023	4.6515	4.5807	4.44568
6.33	5.35085	5.04058	5.1632	5.0984	4.90218	4.95704	5.09635	4.72544	4.99783	4.6469	4.5762	4.44338
6.33333	5.35005	5.03608	5.1603	5.0926	4.89798	4.95494	5.09075	4.72194	4.99403	4.6437	4.5717	4.44178
6.33667	5.34655	5.03048	5.1537	5.085	4.89108	4.94964	5.08605	4.71574	4.99043	4.6424	4.5674	4.43878
6.34	5.33605	5.02388	5.1446	5.08	4.88788	4.94654	5.07755	4.71274	4.98693	4.6369	4.5602	4.43578
6.34333	5.33425	5.01848	5.1428	5.0765	4.88048	4.94224	5.07035	4.70764	4.98643	4.6345	4.5584	4.43288
6.34667	5.33145	5.01568	5.1351	5.0732	4.87068	4.93854	5.06255	4.70274	4.98003	4.632	4.5541	4.43068
6.35	5.32615	5.00838	5.1288	5.0704	4.86788	4.93244	5.05815	4.69764	4.97693	4.6286	4.5498	4.42738
6.35333	5.31925	5.00508	5.1231	5.0684	4.86498	4.92824	5.05175	4.69504	4.97173	4.6234	4.5459	4.42278
6.35667	5.30975	5.00168	5.1198	5.0645	4.85988	4.92324	5.04935	4.69184	4.96223	4.6204	4.5448	4.41728
6.36	5.30405	4.99718	5.1142	5.059	4.85448	4.91914	5.04655	4.68714	4.95503	4.6155	4.539	4.41188
6.36333	5.30145	4.99128	5.1091	5.0539	4.85328	4.91354	5.04445	4.68574	4.95063	4.6137	4.5355	4.40628
6.36667	5.29325	4.98878	5.1045	5.0512	4.84798	4.91154	5.04225	4.68164	4.94663	4.6101	4.5324	4.40178
6.37	5.29115	4.98438	5.0997	5.0467	4.84038	4.90554	5.03575	4.67854	4.94333	4.6053	4.5279	4.39858
6.37333	5.28605	4.97828	5.0966	5.0427	4.83798	4.89794	5.03105	4.67644	4.93743	4.6021	4.5219	4.39538
6.37667	5.28065	4.97178	5.0913	5.042	4.83428	4.89264	5.02625	4.67404	4.93383	4.5985	4.5186	4.39388
6.38	5.27155	4.96678	5.0881	5.0379	4.82828	4.88884	5.02165	4.66964	4.93103	4.591	4.5151	4.39258
6.38333	5.26785	4.96108	5.0814	5.0334	4.82308	4.88124	5.01545	4.66454	4.92693	4.5873	4.5138	4.38978
6.38667	5.26145	4.95638	5.0773	5.0285	4.82008	4.87854	5.01335	4.66084	4.92173	4.585	4.5109	4.38498
6.39	5.25465	4.95178	5.0678	5.0185	4.81398	4.87514	5.01005	4.65624	4.91853	4.5799	4.5079	4.38138
6.39333	5.24965	4.94768	5.0638	5.0089	4.80738	4.87024	5.00605	4.65224	4.91283	4.5773	4.5044	4.37828
6.39667	5.24745	4.94318	5.0589	5.003	4.80548	4.86374	5.00185	4.64744	4.90843	4.5754	4.5009	4.37298
6.4	5.24245	4.93808	5.0548	4.9988	4.80198	4.86074	4.99805	4.64494	4.90163	4.5701	4.4955	4.36958
6.40333	5.23625	4.93318	5.048	4.9894	4.80008	4.85494	4.99405	4.63914	4.89823	4.5655	4.493	4.36778
6.40667	5.23225	4.92748	5.0443	4.9864	4.79348	4.84964	4.98905	4.63654	4.89143	4.5623	4.4891	4.36398
6.41	5.22355	4.92248	5.0356	4.9841	4.79118	4.84484	4.98425	4.63384	4.88773	4.5584	4.4842	4.35978
6.41333	5.22295	4.91658	5.03	4.9776	4.78498	4.84364	4.97715	4.62894	4.88073	4.5525	4.4791	4.35748
6.41667	5.21375	4.91188	5.0235	4.97	4.78138	4.83904	4.96985	4.62644	4.87773	4.5489	4.475	4.35448
6.42	5.21455	4.90598	5.0185	4.9718	4.77468	4.83614	4.96375	4.62184	4.87153	4.5445	4.4689	4.35118
6.42333	5.21235	4.89878	5.0121	4.9659	4.77198	4.83114	4.95875	4.61754	4.86853	4.5398	4.4656	4.34818
6.42667	5.21025	4.89378	5.0104	4.9579	4.76598	4.82734	4.95555	4.61204	4.86493	4.5367	4.4611	4.34628
6.43	5.19925	4.88868	5.0044	4.9593	4.76058	4.82034	4.95365	4.60944	4.86153	4.5367	4.458	4.34238
6.43333	5.19665	4.88538	4.9989	4.9567	4.75248	4.81564	4.95225	4.60254	4.85683	4.5327	4.4561	4.33818
6.43667	5.18735	4.88028	4.9919	4.9494	4.74728	4.81064	4.94875	4.59864	4.85393	4.5315	4.4536	4.33498
6.44	5.18065	4.87718	4.9886	4.9461	4.73828	4.80664	4.94295	4.59594	4.84863	4.5274	4.451	4.33028
6.44333	5.17895	4.87118	4.9785	4.948	4.73498	4.80144	4.93625	4.59114	4.84243	4.5241	4.4494	4.32598
6.44667	5.17325	4.86728	4.9712	4.9394	4.73298	4.79844	4.93285	4.58634	4.83913	4.519	4.4463	4.32228
6.45	5.17125	4.86138	4.9653	4.9366	4.73198	4.79384	4.92895	4.58414	4.83463	4.5145	4.4408	4.31868
6.45333	5.16455	4.85508	4.9629	4.9296	4.72628	4.79074	4.92625	4.58284	4.82873	4.5088	4.4327	4.31488
6.45667	5.15825	4.85048	4.9554	4.9287	4.72638	4.78454	4.91985	4.57644	4.82593	4.5046	4.4291	4.31308
6.46	5.15285	4.84518	4.9534	4.9218	4.72288	4.78144	4.91705	4.57414	4.82133	4.5005	4.4262	4.30978
6.46333	5.14925	4.84008	4.9498	4.9182	4.71728	4.77674	4.91165	4.57134	4.81633	4.4978	4.419	4.30608
6.46667	5.14455	4.83658	4.9443	4.9113	4.71098	4.77434	4.90545	4.56684	4.81353	4.4958	4.4179	4.30368
6.47	5.14225	4.83548	4.9391	4.9082	4.70948	4.76944	4.90015	4.56174	4.80993	4.4937	4.4202	4.30068
6.47333	5.13665	4.82988	4.9324	4.9018	4.70508	4.76664	4.89625	4.55804	4.80543	4.4864	4.4149	4.29778
6.47667	5.12925	4.82608	4.9272	4.8964	4.70098	4.76244	4.89025	4.55234	4.80323	4.4814	4.4091	4.29588
6.48	5.12635	4.82298	4.9217	4.8876	4.69528	4.75764	4.88745	4.54914	4.80343	4.4764	4.4075	4.29578
6.48333	5.12215	4.81538	4.9179	4.8832	4.69088	4.75174	4.88405	4.54694	4.79813	4.4721	4.4032	4.29358
6.48667	5.11755	4.80788	4.9104	4.8789	4.68708	4.74744	4.87875	4.54344	4.79703	4.4668	4.3971	4.29198
6.49	5.11205	4.80418	4.9045	4.8742	4.67828	4.74144	4.87385	4.53994	4.79213	4.4676	4.392	4.28628
6.49333	5.11065	4.79988	4.9011	4.8713	4.67088	4.73734	4.87105	4.53714	4.78763	4.4651	4.3883	4.28148
6.49667	5.10535	4.79468	4.8974	4.8703	4.67008	4.73284	4.86365	4.53304	4.78073	4.4613	4.3854	4.27688
6.5	5.09985	4.79298	4.8895	4.8666	4.66658	4.72754	4.85895	4.52914	4.77793	4.4579	4.3786	4.27158
6.50333	5.09475	4.78978	4.8855	4.8628	4.65988	4.72264	4.85525	4.52624	4.77423	4.4563	4.3729	4.26668
6.50667	5.09185	4.78468	4.8827	4.8582	4.65678	4.71794	4.85145	4.52084	4.76953	4.4521	4.3706	4.26508
6.51	5.08425	4.78178	4.8764	4.8535	4.65718	4.71144	4.84625	4.51674	4.76683	4.4451	4.367	4.26148
6.51333	5.07895	4.77578	4.8693	4.847	4.65098	4.70744	4.84355	4.51204	4.76343	4.4432	4.3637	4.25718
6.51667	5.07425	4.76968	4.8664	4.8436	4.65118	4.70434	4.84015	4.50854	4.75943	4.44	4.3656	4.25578
6.52	5.06995	4.76408	4.8613	4.839	4.64808	4.69804	4.83595	4.50274	4.75403	4.4327	4.3656	4.25268
6.52333	5.06505	4.75738	4.8556	4.8346	4.64318	4.69394	4.83115	4.49914	4.75073	4.4271	4.3656	4.25048
6.52667	5.06045	4.75228	4.8505	4.8296	4.63728	4.69224	4.82825	4.49564	4.74713	4.4268	4.3626	4.24858
6.53	5.05495	4.74948	4.8471	4.8287	4.63508	4.68774	4.82325	4.49374	4.74163	4.4211	4.3597	4.24568
6.53333	5.05045	4.74558	4.8427	4.821	4.62758	4.68254	4.81955	4.48794	4.73863	4.4169	4.3562	4.24198
6.53667	5.04105	4.74158	4.8373	4.8143	4.62378	4.68014	4.81545	4.48714	4.73393	4.4162	4.3502	4.23908
6.54	5.03765	4.73648	4.8296	4.8125	4.62008	4.67544	4.81235	4.48444	4.72933	4.4137	4.3468	4.23388
6.54333	5.03865	4.72968	4.8256	4.8084	4.61638	4.66874	4.80695	4.48254	4.72543	4.4098	4.3451	4.22938
6.54667	5.02715	4.72548	4.8211	4.7979	4.61128	4.66514	4.80245	4.48034	4.72103	4.4047	4.3411	4.22638
6.55	5.02725	4.72138	4.8153	4.7992	4.60808	4.66134	4.79545	4.47924	4.71603	4.4015	4.3381	4.22288
6.55333	5.02635	4.71858	4.8112	4.7963	4.60638	4.65654	4.79135	4.47334	4.71013	4.3976	4.3375	4.21888
6.55667	5.01205	4.71518	4.8066	4.7886	4.60228	4.65244	4.78755	4.47064	4.70573	4.3963	4.332	4.21518
6.56	4.99975	4.71158	4.8012	4.7829	4.59688	4.65064	4.78595	4.46484	4.70013	4.3925	4.3294	4.21328
6.56333	4.99935	4.70598	4.7959	4.7844	4.59408	4.64594	4.78385	4.46074	4.69493	4.3935	4.3249	4.20998
6.56667	4.98925	4.70138	4.792	4.7763	4.58908	4.64214	4.78225	4.45624	4.69043	4.3896	4.3185	4.20588
6.57	4.98205	4.69788	4.7871	4.7713	4.58008	4.63894	4.77885	4.45224	4.68913	4.3865	4.3146	4.20458
6.57333	4.98325	4.69178	4.7807	4.7669	4.57908	4.63424	4.77295	4.44664	4.68663	4.3823	4.3128	4.20288
6.57667	4.98255	4.68688	4.7738	4.7636	4.57578	4.62934	4.76825	4.44474	4.68193	4.3785	4.3092	4.20048
6.58	4.97905	4.68318	4.7683	4.7582	4.56828	4.62594	4.76285	4.44004	4.68243	4.3734	4.3054	4.19848
6.58333	4.97585	4.67728	4.764	4.7523	4.56418	4.62054	4.75865	4.43664	4.68003	4.3694	4.3029	4.19648
6.58667	4.97535	4.67008	4.7596	4.7492	4.56248	4.61694	4.75485	4.43484	4.67763	4.3641	4.3006	4.19298
6.59	4.97185	4.66598	4.755	4.7447	4.55618	4.61254	4.74995	4.43304	4.67173	4.3588	4.2951	4.18838
6.59333	4.96395	4.66338	4.7511	4.7406	4.55008	4.60664	4.74505	4.42884	4.67043	4.3562	4.2922	4.18478
6.59667	4.95885	4.65778	4.7466	4.7363	4.54958	4.60224	4.73895	4.42634	4.66443	4.3519	4.2891	4.18018
6.6	4.94985	4.65508	4.7414	4.7358	4.54478	4.59934	4.73425	4.42304	4.65963	4.3499	4.287	4.17768
6.60333	4.94555	4.65138	4.7377	4.7352	4.54048	4.59504	4.72995	4.41964	4.65123	4.3477	4.2801	4.17398
6.60667	4.93915	4.64588	4.7316	4.729	4.53668	4.58984	4.72635	4.41464	4.64433	4.3439	4.2784	4.17068
6.61	4.93735	4.64068	4.7264	4.723	4.53218	4.58694	4.72135	4.41334	4.63953	4.3398	4.2747	4.16758
6.61333	4.93335	4.63648	4.7202	4.7215	4.52698	4.58444	4.71985	4.40924	4.63623	4.3368	4.2747	4.16458
6.61667	4.93255	4.63088	4.7157	4.7197	4.52568	4.58024	4.71695	4.40564	4.63143	4.334	4.2702	4.15968
6.62	4.92605	4.62628	4.7102	4.712	4.52288	4.57684	4.71385	4.40194	4.62983	4.3312	4.2661	4.15748
6.62333	4.92235	4.62248	4.7069	4.7114	4.51648	4.57264	4.71035	4.39964	4.62863	4.3269	4.2625	4.15548
6.62667	4.91495	4.61678	4.7018	4.7085	4.51348	4.56914	4.70815	4.39544	4.62283	4.3223	4.2611	4.15238
6.63	4.91385	4.61208	4.695	4.7045	4.50988	4.56284	4.70645	4.39104	4.61763	4.3183	4.2561	4.14978
6.63333	4.90955	4.60738	4.6896	4.6996	4.50518	4.56064	4.70295	4.38884	4.61393	4.3121	4.2533	4.14828
6.63667	4.90475	4.60378	4.6839	4.6937	4.50278	4.55444	4.69885	4.38404	4.60883	4.3091	4.2533	4.14568
6.64	4.89765	4.59858	4.6792	4.6902	4.50078	4.55124	4.69465	4.37994	4.60483	4.3062	4.2504	4.14168
6.64333	4.89685	4.59618	4.6746	4.6892	4.49878	4.54644	4.68915	4.37564	4.60043	4.3035	4.2452	4.13908
6.64667	4.88985	4.59308	4.6717	4.6814	4.49618	4.54254	4.68375	4.37324	4.59923	4.3002	4.2433	4.13678
6.65	4.88585	4.59008	4.6674	4.6736	4.49058	4.53664	4.67555	4.36714	4.59523	4.2999	4.237	4.13468
6.65333	4.88155	4.58538	4.6603	4.6727	4.48208	4.53214	4.67045	4.36634	4.59243	4.2965	4.235	4.13108
6.65667	4.87875	4.58368	4.6545	4.6685	4.47878	4.52604	4.66605	4.36404	4.58583	4.2917	4.2326	4.12668
6.66	4.87375	4.58058	4.6499	4.6622	4.47518	4.52254	4.66095	4.36134	4.58553	4.2886	4.2297	4.12378
[truncated: 22,302 more rows]
