# Supplementary material for: Early steps of protein disaggregation by Hsp70 chaperone and class B J-domain proteins are shaped by Hsp110
Source: eLife. 2024 Oct 15;13:RP94795. doi: 10.7554/eLife.94795 (PMC11479587; doi:10.7554/eLife.94795)
Supplement: Figure 4—figure supplement 1—source data 4. [file elife-94795-fig4-figsupp1-data4.xlsx]

## Sheet: Figure 4—figure supplement 1D
Time (min)	0	2	4	6	8	10	12	14	16	18	20	22	24	26	28	30	32	34	36	38	40	42	44	46	48	50	52	54	56	58	60	62	64	66	68	70	72	74	76	78	80	82	84	86	88	90	92	94	96
Ssa1, Sis1 0.05 uM, Sse1 0 uM	0.7	0.712313	0.738546	0.7727	0.838655	0.913211	0.962028	1.05143	1.14925	1.20772	1.31656	1.39823	1.48318	1.54437	1.60463	1.71278	1.77936	1.83944	1.87842	1.96287	2.01132	2.03891	2.10778	2.1449	2.18499	2.23016	2.27273	2.2963	2.30688	2.36702	2.4443	2.44708	2.42747	2.50023	2.52151	2.54793	2.60133	2.58957	2.61073	2.59916	2.64384	2.68832	2.67465	2.70719	2.70948	2.70874	2.73807	2.74227	2.7505
Ssa1, Sis1 0.05 uM, Sse1 0.1 uM	0.7	0.734339	0.792746	0.894835	1.02879	1.13589	1.30059	1.44315	1.57085	1.70499	1.80949	1.96702	2.02549	2.14867	2.22478	2.30168	2.38855	2.4396	2.52739	2.57151	2.68257	2.70026	2.7669	2.82654	2.88619	2.91675	2.98927	3.01915	3.01804	3.11047	3.16195	3.16653	3.19344	3.24226	3.25259	3.31935	3.32474	3.34992	3.38178	3.46302	3.45968	3.46933	3.45881	3.53461	3.55373	3.50188	3.56765	3.62451	3.63459
Ssa1, Sis1 0.05 uM, Sse1 0.5 uM	0.7	0.707177	0.748075	0.821702	0.895268	0.982446	1.07482	1.13706	1.25864	1.34198	1.45311	1.51318	1.58867	1.6209	1.69032	1.74384	1.8106	1.84661	1.88429	1.93237	1.97834	2.03749	2.06137	2.10252	2.09639	2.15065	2.19415	2.20844	2.24952	2.26697	2.30645	2.28708	2.35013	2.38837	2.3836	2.39734	2.45005	2.43768	2.47585	2.49305	2.52015	2.47066	2.52473	2.57788	2.58722	2.59755	2.60133	2.60807	2.65776
Ssa1, Sis1 0.05 uM, Sse1 1 uM	0.7	0.723326	0.758469	0.754942	0.821702	0.855485	0.907024	0.953119	0.992717	1.02539	1.0919	1.12123	1.14919	1.1701	1.22962	1.27182	1.27188	1.25957	1.3142	1.35269	1.37261	1.3684	1.41914	1.40992	1.42081	1.45843	1.4614	1.48404	1.4807	1.50527	1.51417	1.50669	1.54789	1.56466	1.56862	1.52636	1.5724	1.55309	1.58112	1.61676	1.59993	1.60036	1.61243	1.61639	1.65438	1.64652	1.66836	1.64769	1.63817
Ssa1, Sis1 0.05 uM, Sse1 2 uM	0.7	0.726358	0.734772	0.720542	0.756304	0.748693	0.772081	0.787735	0.798067	0.825538	0.826281	0.833953	0.846204	0.863342	0.88209	0.872376	0.896258	0.880666	0.899723	0.937341	0.91383	0.921564	0.937032	0.952871	0.944209	0.9697	0.966916	0.939012	0.992779	0.980899	0.972794	0.980095	0.992717	1.00843	0.99315	1.002	1.02675	1.01128	0.996862	1.02204	0.995192	1.02303	1.03139	0.995872	1.0333	1.04234	1.01085	1.03702	1.04667
Ssa1, Sis1 0.05 uM, Sse1 4 uM	0.7	0.699938	0.729204	0.722831	0.733658	0.748631	0.749621	0.779753	0.783651	0.819351	0.820898	0.829746	0.834819	0.832592	0.881904	0.845832	0.890566	0.902012	0.916923	0.923049	0.898114	0.924905	0.952252	0.941115	0.955099	0.931278	0.961904	0.97496	0.969082	0.959739	0.97861	0.985107	0.993769	0.972423	0.989994	0.994697	0.998595	1.00324	1.03572	1.01666	1.02588	1.03238	1.01122	1.01165	1.02062	1.0174	1.01808	1.01895	1.03677
Ssa1, Sis1 0.05 uM, Sse1 0 uM	0.7	0.700681	0.734586	0.731369	0.767007	0.791076	0.848369	0.901827	0.94192	1.02724	1.09357	1.17437	1.2493	1.31117	1.38523	1.4481	1.51826	1.61366	1.6657	1.71712	1.77763	1.79353	1.85299	1.90935	1.95433	1.99207	2.01033	2.06954	2.10518	2.1324	2.16006	2.17553	2.23393	2.26598	2.26085	2.28603	2.29618	2.35069	2.34642	2.38261	2.38985	2.42796	2.42877	2.42648	2.44597	2.47332	2.54812	2.51465	2.52653
Ssa1, Sis1 0.05 uM, Sse1 0.1 uM	0.7	0.7099	0.733102	0.814835	0.869406	0.953366	1.11491	1.25369	1.39309	1.50669	1.62022	1.7509	1.84531	1.95656	2.03105	2.11706	2.20955	2.26363	2.32346	2.4034	2.47461	2.49188	2.57188	2.61927	2.68504	2.74277	2.74246	2.79592	2.82636	2.85389	2.92758	2.92529	2.95078	3.01531	3.04241	3.05064	3.09037	3.12143	3.14661	3.16591	3.21844	3.18769	3.22716	3.27611	3.28031	3.31372	3.3115	3.31088	3.37937
Ssa1, Sis1 0.05 uM, Sse1 0.5 uM	0.7	0.726419	0.748508	0.791261	0.864951	0.951386	1.03176	1.15711	1.24751	1.33116	1.41332	1.47427	1.57834	1.6141	1.65685	1.75869	1.81357	1.80689	1.88689	1.93088	1.98038	1.99777	2.04671	2.08383	2.11582	2.15981	2.18784	2.22651	2.25268	2.2494	2.29803	2.31399	2.34103	2.36207	2.3815	2.4094	2.41893	2.44516	2.44591	2.48482	2.48588	2.53123	2.53457	2.56606	2.57609	2.5725	2.5905	2.6327	2.62465
Ssa1, Sis1 0.05 uM, Sse1 1 uM	0.7	0.696845	0.708476	0.724873	0.772143	0.82659	0.832839	0.891556	0.940621	0.998657	0.995501	1.03795	1.07519	1.1315	1.1503	1.17604	1.19516	1.23643	1.25963	1.30975	1.29075	1.32231	1.34502	1.34038	1.35659	1.38431	1.43479	1.41054	1.46554	1.45663	1.48608	1.4812	1.46338	1.51306	1.52649	1.52339	1.51906	1.5414	1.56404	1.56633	1.57271	1.58551	1.61342	1.59919	1.62691	1.6115	1.62047	1.5969	1.65617
Ssa1, Sis1 0.05 uM, Sse1 2 uM	0.7	0.698082	0.703217	0.715777	0.721903	0.734525	0.715963	0.728276	0.764099	0.755623	0.772081	0.785693	0.787735	0.786745	0.78792	0.783837	0.804626	0.828075	0.838593	0.851834	0.830426	0.830179	0.841316	0.860311	0.855856	0.851401	0.872128	0.880233	0.868973	0.869653	0.899476	0.891247	0.89168	0.871881	0.889329	0.879986	0.890566	0.892298	0.893907	0.90591	0.899414	0.899909	0.915067	0.912221	0.912221	0.924905	0.910613	0.927999	0.903745
Ssa1, Sis1 0.05 uM, Sse1 4 uM	0.7	0.691524	0.691524	0.690719	0.681871	0.669497	0.67983	0.704764	0.69901	0.708662	0.723944	0.745538	0.746218	0.731679	0.781238	0.760635	0.780867	0.768987	0.782909	0.767688	0.812978	0.806729	0.818856	0.809885	0.828261	0.851092	0.820712	0.813968	0.845585	0.837789	0.831973	0.843729	0.858393	0.833706	0.862105	0.851525	0.866003	0.828632	0.869158	0.856598	0.862476	0.861115	0.882461	0.832097	0.870581	0.861486	0.887101	0.853072	0.869406
Ssa1, Sis1 0.05 uM, Sse1 0 uM	0.7	0.722955	0.707796	0.747827	0.784641	0.842306	0.89366	0.940682	0.997976	1.09431	1.19881	1.25153	1.35405	1.40373	1.50378	1.56361	1.60469	1.69738	1.73636	1.81772	1.88089	1.90255	2.01132	2.04003	2.09051	2.116	2.1431	2.19403	2.21945	2.25317	2.27291	2.33082	2.34809	2.3484	2.38874	2.40532	2.44807	2.51087	2.49707	2.53853	2.51613	2.54348	2.56093	2.57961	2.63053	2.62868	2.60015	2.66388	2.6551
Ssa1, Sis1 0.05 uM, Sse1 0.1 uM	0.7	0.727595	0.779567	0.8527	0.885245	1.00088	1.15365	1.29898	1.4265	1.57066	1.68661	1.82323	1.95736	2.05283	2.14397	2.24829	2.29741	2.40835	2.47474	2.56216	2.6038	2.67248	2.70305	2.78998	2.84331	2.93036	2.92412	2.99422	2.98364	3.05782	3.11709	3.11846	3.16684	3.21114	3.25538	3.31428	3.28143	3.35889	3.34769	3.40641	3.40591	3.50856	3.48666	3.46642	3.49643	3.47533	3.55144	3.60149	3.631
Ssa1, Sis1 0.05 uM, Sse1 0.5 uM	0.7	0.738794	0.768121	0.831045	0.903745	1.00602	1.11015	1.17283	1.28191	1.38115	1.48522	1.59065	1.64949	1.74372	1.74793	1.86654	1.89623	1.98805	1.99851	2.08142	2.13933	2.16983	2.23734	2.24117	2.31065	2.34382	2.37556	2.40872	2.4383	2.45958	2.5092	2.53884	2.55808	2.5467	2.58704	2.62515	2.65726	2.70441	2.7023	2.72532	2.7273	2.7466	2.81881	2.83384	2.84999	2.8365	2.87827	2.91199	2.89429
Ssa1, Sis1 0.05 uM, Sse1 1 uM	0.7	0.719613	0.731369	0.776536	0.822135	0.849545	0.869158	0.933258	0.981889	0.999708	1.10174	1.10755	1.13069	1.20246	1.23408	1.25357	1.2858	1.3384	1.37199	1.37911	1.40559	1.4304	1.43844	1.47433	1.49308	1.49332	1.5164	1.531	1.56701	1.57326	1.58223	1.59721	1.61317	1.64114	1.6472	1.66279	1.67925	1.71105	1.7006	1.70152	1.70901	1.70542	1.7061	1.70808	1.73345	1.74273	1.77719	1.82292	1.77602
Ssa1, Sis1 0.05 uM, Sse1 2 uM	0.7	0.710889	0.71949	0.739103	0.73106	0.723202	0.77734	0.748817	0.80277	0.77536	0.803945	0.799738	0.84707	0.822012	0.822816	0.832282	0.865508	0.879986	0.863775	0.881347	0.885369	0.912345	0.918285	0.913459	0.930102	0.942786	0.929855	0.949159	0.942848	0.922121	0.94458	0.944147	0.957388	0.978981	0.96042	0.982384	0.981147	0.962956	0.963884	0.992717	0.999585	0.986344	0.972546	1.00181	0.997357	0.996986	1.00305	0.990551	0.989685
Ssa1, Sis1 0.05 uM, Sse1 4 uM	0.7	0.701052	0.687997	0.684532	0.658546	0.685089	0.702722	0.720789	0.708662	0.725863	0.721037	0.74529	0.74232	0.75983	0.78724	0.764347	0.791447	0.802027	0.801841	0.793674	0.825415	0.833272	0.85072	0.813535	0.846142	0.863033	0.852391	0.839212	0.857898	0.860063	0.860744	0.899228	0.890442	0.883698	0.848802	0.898671	0.892175	0.88871	0.894897	0.90721	0.901579	0.897743	0.890195	0.898486	0.913026	0.885307	0.901084	0.886792	0.907952
Ssa1, Sis1 0.25 uM, Sse1 0 uM	0.7	0.70761	0.716396	0.752158	0.765275	0.777216	0.799862	0.804254	0.859444	0.916985	0.961286	0.974341	1.03974	1.0622	1.11058	1.15024	1.15903	1.24138	1.25951	1.26972	1.32918	1.35244	1.41171	1.41889	1.44141	1.45898	1.50192	1.54134	1.56268	1.57159	1.59603	1.62356	1.66514	1.66991	1.67677	1.7022	1.74644	1.75702	1.76791	1.77558	1.79297	1.80906	1.83306	1.82898	1.87767	1.8395	1.919	1.87978	1.90681
Ssa1, Sis1 0.25 uM, Sse1 0.1 uM	0.7	0.719799	0.776598	0.795221	0.830798	0.886668	1.01567	1.14907	1.24924	1.35504	1.47872	1.58199	1.68859	1.80708	1.8778	1.98545	2.04021	2.13327	2.20114	2.25905	2.30762	2.41745	2.42945	2.45816	2.51236	2.61228	2.62484	2.64136	2.67879	2.75601	2.81411	2.81912	2.88322	2.90104	2.88755	2.98283	2.97497	2.99607	2.99434	3.09136	3.03846	3.05541	3.10255	3.11654	3.14741	3.16901	3.19982	3.21962	3.23502
Ssa1, Sis1 0.25 uM, Sse1 0.5 uM	0.7	0.728956	0.772328	0.812483	0.889824	0.980775	1.08973	1.19689	1.31563	1.41079	1.53651	1.61534	1.72126	1.80603	1.91257	1.9427	2.03588	2.11242	2.15226	2.20733	2.28832	2.31684	2.38806	2.43038	2.46447	2.50759	2.51762	2.64049	2.62255	2.67545	2.67384	2.71511	2.76708	2.80359	2.78608	2.83001	2.85222	2.90042	2.93179	2.929	2.96062	2.95363	2.9712	3.00634	3.03202	3.0697	3.02856	3.06655	3.12495
Ssa1, Sis1 0.25 uM, Sse1 1 uM	0.7	0.726296	0.769482	0.8256	0.884441	0.94557	1.0247	1.11999	1.21224	1.24992	1.34564	1.41382	1.45311	1.53762	1.56949	1.62703	1.69719	1.72083	1.73178	1.80578	1.81364	1.89481	1.90849	1.9276	1.94561	1.9474	2.02802	2.05525	2.05487	2.07294	2.11341	2.12529	2.14991	2.14595	2.21358	2.23214	2.2296	2.20776	2.25757	2.30038	2.30094	2.30849	2.30787	2.35848	2.35526	2.37407	2.38453	2.4245	2.41874
Ssa1, Sis1 0.25 uM, Sse1 2 uM	0.7	0.705259	0.674942	0.701856	0.741207	0.773257	0.778949	0.831045	0.837356	0.816753	0.896691	0.905353	0.927256	0.918037	0.977001	0.966236	0.960976	1.01351	1.01054	1.04599	1.04457	1.0596	1.063	1.09066	1.05515	1.07606	1.11139	1.09518	1.08107	1.12308	1.09914	1.12005	1.13744	1.1331	1.15705	1.16819	1.16286	1.15563	1.16992	1.18972	1.1873	1.16961	1.16491	1.18718	1.21051	1.19727	1.2196	1.19374	1.19696
Ssa1, Sis1 0.25 uM, Sse1 4 uM	0.7	0.718747	0.71949	0.697587	0.691214	0.725429	0.736195	0.727162	0.764533	0.766884	0.767255	0.776288	0.811988	0.812298	0.843543	0.850906	0.855794	0.861053	0.865817	0.874789	0.858826	0.874046	0.871942	0.891185	0.887287	0.871881	0.917604	0.900589	0.892298	0.916429	0.922492	0.922183	0.907395	0.921007	0.913521	0.918965	0.961719	0.930721	0.940435	0.954356	0.943962	0.952129	0.960605	0.961162	0.942848	0.984921	0.976321	0.951696	0.97366
Ssa1, Sis1 0.25 uM, Sse1 0 uM	0.7	0.689729	0.716458	0.735638	0.769977	0.802708	0.837356	0.908014	0.959182	0.963884	1.04469	1.08577	1.12518	1.18502	1.22257	1.27553	1.30963	1.36618	1.41054	1.40813	1.4906	1.53045	1.55247	1.61323	1.66217	1.67046	1.70103	1.74793	1.74069	1.81246	1.83498	1.83838	1.86282	1.91374	1.92562	1.98867	1.96275	1.97859	2.02586	2.02839	2.05853	2.06644	2.09534	2.11452	2.1087	2.1345	2.15925	2.18146	2.2051
Ssa1, Sis1 0.25 uM, Sse1 0.1 uM	0.7	0.712127	0.771277	0.833396	0.923915	1.00917	1.12296	1.25376	1.42588	1.56639	1.6782	1.77614	1.89494	2.01293	2.0873	2.18815	2.26264	2.37036	2.437	2.52529	2.57472	2.58648	2.68387	2.78131	2.80613	2.81534	2.8451	2.91106	2.93612	2.99861	3.03654	3.06778	3.12526	3.11295	3.16319	3.22085	3.27048	3.25278	3.27623	3.30611	3.34713	3.34082	3.41099	3.37974	3.46667	3.45386	3.45789	3.49897	3.47614
Ssa1, Sis1 0.25 uM, Sse1 0.5 uM	0.7	0.730936	0.787425	0.859135	0.977558	1.08608	1.21032	1.31662	1.44927	1.57524	1.69478	1.73283	1.84909	1.92197	2.0227	2.07801	2.1303	2.23028	2.26054	2.36114	2.39808	2.46948	2.48563	2.53475	2.58314	2.60894	2.63901	2.72922	2.76585	2.79592	2.78868	2.85049	2.80885	2.86317	2.90809	2.96842	2.95883	2.98252	3.04452	3.00486	3.05151	3.03561	3.08969	3.15292	3.12013	3.19951	3.15279	3.1906	3.20025
Ssa1, Sis1 0.25 uM, Sse1 1 uM	0.7	0.728956	0.752839	0.809514	0.865137	0.952005	1.00961	1.06511	1.13601	1.20574	1.24008	1.28983	1.37867	1.40528	1.44185	1.50254	1.50731	1.57246	1.62016	1.59368	1.6446	1.65363	1.6816	1.73159	1.7405	1.78913	1.75721	1.81475	1.85305	1.85843	1.8721	1.86264	1.91282	1.88931	1.96757	1.94035	1.96999	1.95272	2.00074	1.97753	1.99474	2.04225	2.04411	2.02066	2.08006	2.07554	2.05655	2.08266	2.09806
Ssa1, Sis1 0.25 uM, Sse1 2 uM	0.7	0.695669	0.723759	0.749931	0.777711	0.778639	0.794664	0.854371	0.840573	0.894155	0.894402	0.906838	0.92806	0.945942	0.961657	0.949159	0.966731	0.967844	0.977744	0.982879	1.01264	0.99581	1.00986	1.01895	1.03764	1.04797	1.03213	1.03832	1.07754	1.09623	1.05898	1.09165	1.06839	1.08781	1.08831	1.07674	1.10174	1.09839	1.09963	1.088	1.09914	1.09808	1.10712	1.09648	1.10161	1.09233	1.08256	1.12723	1.10947
Ssa1, Sis1 0.25 uM, Sse1 4 uM	0.7	0.691276	0.741702	0.737866	0.714354	0.733411	0.747332	0.757541	0.792684	0.796644	0.809947	0.846761	0.849421	0.87782	0.88871	0.88939	0.894959	0.897743	0.911726	0.91383	0.913459	0.944766	0.949839	0.935733	0.961533	0.945447	0.968958	0.973846	0.96605	0.985045	0.956522	0.977867	0.967782	1.01468	1.01549	0.972175	0.999523	1.00262	0.987643	1.00354	1.02198	0.986468	1.02161	1.01264	1.01091	0.988386	1.01629	1.01598	1.01833
Ssa1, Sis1 0.25 uM, Sse1 0 uM	0.7	0.735515	0.736752	0.737866	0.779691	0.807162	0.834943	0.841192	0.903683	0.916243	0.942105	0.999585	1.04104	1.11133	1.11925	1.19411	1.20277	1.19139	1.25079	1.2941	1.32924	1.37063	1.39284	1.44543	1.4854	1.49555	1.51325	1.55464	1.5685	1.58279	1.62957	1.6063	1.66155	1.66916	1.6949	1.72454	1.69998	1.74991	1.75814	1.79823	1.81617	1.82211	1.81079	1.83195	1.84569	1.84804	1.88974	1.88244	1.89098
Ssa1, Sis1 0.25 uM, Sse1 0.1 uM	0.7	0.711075	0.741145	0.787982	0.845956	0.970257	1.08918	1.19956	1.37867	1.4653	1.59702	1.73159	1.81988	1.8937	2.00402	2.07634	2.15269	2.18963	2.2799	2.31783	2.3836	2.45686	2.49454	2.52349	2.56971	2.62756	2.71938	2.71041	2.75898	2.79047	2.85414	2.83261	2.89968	2.89732	2.94231	2.96891	2.95753	3.03128	3.06846	3.08814	3.10719	3.08195	3.15614	3.15378	3.18614	3.15279	3.17198	3.21498	3.21114
Ssa1, Sis1 0.25 uM, Sse1 0.5 uM	0.7	0.720665	0.767936	0.802831	0.87881	0.990489	1.11844	1.20092	1.2923	1.41691	1.50087	1.61243	1.69756	1.77961	1.81605	1.92402	1.97605	2.03322	2.0675	2.14112	2.14447	2.21828	2.2593	2.29061	2.32823	2.38595	2.40532	2.47845	2.4899	2.49806	2.51966	2.53494	2.57305	2.61884	2.63449	2.62564	2.66679	2.68275	2.6752	2.72408	2.74221	2.77748	2.7729	2.82135	2.8305	2.84616	2.82988	2.86107	2.91013
Ssa1, Sis1 0.25 uM, Sse1 1 uM	0.7	0.71058	0.744672	0.802213	0.837727	0.925214	1.00039	1.09709	1.14764	1.21886	1.25555	1.34335	1.3822	1.42966	1.47804	1.49963	1.53973	1.58892	1.61837	1.65877	1.6597	1.68692	1.75987	1.73896	1.75325	1.78418	1.81766	1.82582	1.85299	1.90397	1.91077	1.89809	1.92284	1.92049	1.94951	1.96256	2.00377	1.99696	1.99381	2.08111	2.04912	2.06725	2.11056	2.0748	2.06867	2.08173	2.10505	2.09899	2.08989
Ssa1, Sis1 0.25 uM, Sse1 2 uM	0.7	0.704826	0.748075	0.769049	0.778639	0.788106	0.80939	0.850659	0.853319	0.903559	0.91482	0.93431	0.948416	0.961843	0.968958	0.969886	0.987396	1.03139	0.995934	1.02687	1.03163	1.04017	1.07618	1.05669	1.04865	1.06771	1.0708	1.07946	1.08528	1.07414	1.08738	1.09233	1.11887	1.1125	1.13669	1.12246	1.11764	1.11163	1.143	1.13508	1.13515	1.14635	1.1409	1.15594	1.14863	1.13607	1.17375	1.16936	1.14622
Ssa1, Sis1 0.25 uM, Sse1 4 uM	0.7	0.724687	0.715901	0.717572	0.721717	0.719613	0.738237	0.773009	0.723016	0.762243	0.765832	0.749745	0.77468	0.802522	0.805306	0.827951	0.826095	0.846451	0.820156	0.864394	0.847627	0.858516	0.857031	0.877697	0.891618	0.879243	0.877449	0.87881	0.884193	0.879491	0.886111	0.890257	0.891185	0.897124	0.909994	0.899909	0.90195	0.910984	0.927071	0.927256	0.905848	0.930845	0.906282	0.917852	0.921997	0.930226	0.90789	0.940621	0.917047
Ssa1, Sis1 2 uM, Sse1 0 uM	0.7	0.702413	0.727781	0.756675	0.741516	0.778392	0.79386	0.820279	0.862105	0.87516	0.919089	0.929174	0.989066	0.975145	1.01963	1.04846	1.07123	1.12983	1.12197	1.16732	1.17703	1.20141	1.20556	1.23977	1.25054	1.26242	1.27541	1.31575	1.31971	1.31755	1.3848	1.39427	1.36983	1.39154	1.42675	1.44513	1.48404	1.46189	1.47117	1.52086	1.50984	1.49456	1.49722	1.54517	1.56584	1.54672	1.5633	1.59461	1.58811
Ssa1, Sis1 2 uM, Sse1 0.1 uM	0.7	0.738732	0.768307	0.803945	0.853195	0.934681	1.01177	1.10248	1.22839	1.3267	1.3947	1.51436	1.57673	1.65586	1.76754	1.81691	1.9117	1.98218	2.03693	2.0881	2.1509	2.19341	2.24569	2.29785	2.39245	2.40303	2.44021	2.46985	2.49182	2.54428	2.57342	2.59502	2.65837	2.68003	2.6994	2.70657	2.7505	2.79777	2.79258	2.78032	2.84325	2.8805	2.87022	2.91533	2.91706	2.94998	2.98809	3.01247	3.02719
Ssa1, Sis1 2 uM, Sse1 0.5 uM	0.7	0.710023	0.749003	0.814958	0.920698	0.969144	1.07563	1.19287	1.27492	1.35603	1.41982	1.56114	1.64318	1.69806	1.78406	1.87891	1.9148	1.95817	2.06564	2.09429	2.12955	2.17274	2.22156	2.31152	2.32847	2.35743	2.40439	2.43267	2.42072	2.46558	2.49479	2.55814	2.54107	2.61704	2.58716	2.64173	2.63932	2.72049	2.72266	2.72346	2.75935	2.78323	2.82988	2.83818	2.85408	2.84869	2.88798	2.90042	2.91917
Ssa1, Sis1 2 uM, Sse1 1 uM	0.7	0.712869	0.765089	0.831664	0.910056	0.988015	1.07921	1.16918	1.22808	1.32615	1.39371	1.42001	1.50174	1.55996	1.63056	1.66366	1.70882	1.74595	1.78821	1.83789	1.90341	1.90923	1.95043	2.01367	2.04318	2.06069	2.08092	2.09002	2.11996	2.16024	2.15839	2.19174	2.23399	2.2158	2.25491	2.25627	2.26567	2.28219	2.33936	2.36003	2.38199	2.38614	2.40315	2.40346	2.44207	2.44578	2.44931	2.49386	2.49002
Ssa1, Sis1 2 uM, Sse1 2 uM	0.7	0.704269	0.739413	0.785383	0.817557	0.857341	0.930783	0.97663	1.00286	1.03856	1.10699	1.16169	1.18737	1.24163	1.24831	1.29273	1.31191	1.34359	1.36185	1.36809	1.38857	1.40268	1.44259	1.4411	1.46115	1.48522	1.50483	1.52327	1.52748	1.57617	1.54264	1.56008	1.55062	1.54505	1.60643	1.62858	1.61305	1.64701	1.66304	1.66799	1.67554	1.66378	1.68061	1.66749	1.69701	1.71575	1.72392	1.73506	1.72912
Ssa1, Sis1 2 uM, Sse1 4 uM	0.7	0.698391	0.709405	0.728523	0.748384	0.756984	0.783589	0.784765	0.828632	0.816567	0.822692	0.869158	0.870829	0.88079	0.875098	0.900899	0.896568	0.927442	0.931278	0.917171	0.967597	0.977187	0.960605	0.98325	0.980404	0.9968	0.98919	0.989809	0.995934	0.990799	1.00651	0.981889	1.00942	1.01301	1.02953	1.002	1.02272	1.04122	1.03894	1.05725	1.02625	1.01004	1.051	1.03652	1.04871	1.06492	1.03776	1.06245	1.0497
Ssa1, Sis1 2 uM, Sse1 0 uM	0.7	0.703898	0.733163	0.752282	0.8084	0.808585	0.84874	0.893226	0.938641	0.978053	1.02186	1.04079	1.08676	1.12716	1.16478	1.16076	1.25054	1.24268	1.29014	1.32478	1.34434	1.40738	1.40757	1.41852	1.4781	1.45849	1.5237	1.54381	1.53756	1.59294	1.60018	1.61008	1.6365	1.6644	1.64528	1.66514	1.72225	1.73283	1.73549	1.72237	1.73345	1.77317	1.78128	1.80702	1.83387	1.81456	1.82787	1.81821	1.86301
Ssa1, Sis1 2 uM, Sse1 0.1 uM	0.7	0.718376	0.778021	0.87219	0.96871	1.07086	1.17338	1.29861	1.41902	1.54196	1.62103	1.7582	1.82719	1.94109	2.00457	2.08136	2.15542	2.23548	2.29457	2.36281	2.38348	2.44702	2.48099	2.56817	2.58933	2.65491	2.71097	2.73002	2.80829	2.82772	2.83985	2.91279	2.929	2.96013	3.01191	3.0718	3.07391	3.07892	3.0929	3.10336	3.16721	3.18317	3.17111	3.25031	3.2456	3.27103	3.29102	3.30964	3.34942
Ssa1, Sis1 2 uM, Sse1 0.5 uM	0.7	0.724254	0.796768	0.884998	0.972608	1.09629	1.19244	1.32744	1.4171	1.52544	1.60531	1.69763	1.79613	1.8588	1.9083	1.99857	2.09509	2.11322	2.14366	2.18802	2.24816	2.32835	2.34629	2.36157	2.42407	2.47424	2.53197	2.52832	2.5626	2.60158	2.62614	2.64062	2.72538	2.69123	2.70707	2.76436	2.77228	2.80662	2.81602	2.87047	2.85012	2.93754	2.86503	2.93494	2.99069	2.99385	2.97658	2.9931	3.03753
Ssa1, Sis1 2 uM, Sse1 1 uM	0.7	0.713612	0.772081	0.855113	0.961843	1.0416	1.10563	1.18966	1.26854	1.30536	1.37874	1.46356	1.51356	1.56497	1.57382	1.66675	1.68995	1.71526	1.75764	1.80021	1.83548	1.83374	1.90125	1.91344	1.92934	1.95879	1.95681	2.00259	1.97908	2.03384	2.05382	2.05203	2.09571	2.10004	2.14088	2.14675	2.16767	2.17726	2.15047	2.16952	2.2163	2.20522	2.2413	2.23993	2.25194	2.28355	2.29085	2.2929	2.28869
Ssa1, Sis1 2 uM, Sse1 2 uM	0.7	0.728585	0.768183	0.804811	0.878315	0.87615	0.950211	0.983745	1.06789	1.10105	1.11467	1.15402	1.18996	1.20679	1.25505	1.24051	1.27151	1.31674	1.31451	1.3499	1.34638	1.371	1.34143	1.39847	1.38134	1.41171	1.41536	1.4283	1.43646	1.42545	1.45719	1.49141	1.50458	1.49778	1.52011	1.50929	1.52117	1.52327	1.53583	1.51981	1.5581	1.57301	1.57376	1.57914	1.54592	1.55891	1.53985	1.57704	1.58397
Ssa1, Sis1 2 uM, Sse1 4 uM	0.7	0.693565	0.699258	0.723573	0.739784	0.755437	0.772762	0.792189	0.809761	0.813288	0.808152	0.831664	0.834943	0.864394	0.882646	0.886916	0.88871	0.891742	0.889081	0.906715	0.913026	0.922368	0.929422	0.900837	0.938084	0.929855	0.904549	0.946003	0.916305	0.9439	0.950334	0.93004	0.957326	0.969577	0.954913	0.96772	0.962894	0.966483	0.97001	0.988262	1.0088	0.969762	0.998285	0.980095	0.957635	0.970876	0.96772	0.981023	0.981518
Ssa1, Sis1 2 uM, Sse1 0 uM	0.7	0.716272	0.684346	0.739846	0.743434	0.773813	0.814896	0.820836	0.840511	0.850225	0.906962	0.908261	0.932948	0.95516	0.972175	1.00893	1.04395	1.08664	1.07049	1.08299	1.12079	1.1443	1.17895	1.21527	1.20915	1.22127	1.23662	1.26997	1.29552	1.29224	1.3267	1.34495	1.34706	1.3616	1.35287	1.4012	1.39891	1.43677	1.42471	1.42013	1.43089	1.45422	1.45719	1.47946	1.49345	1.49654	1.50823	1.56052	1.54715
Ssa1, Sis1 2 uM, Sse1 0.1 uM	0.7	0.737371	0.765089	0.764656	0.812483	0.896258	0.959182	1.05428	1.13317	1.26477	1.31841	1.44426	1.56083	1.61806	1.70288	1.81766	1.90044	1.94016	2.02808	2.06453	2.135	2.24352	2.23511	2.30905	2.35755	2.36826	2.40792	2.44052	2.51359	2.53395	2.58475	2.60597	2.60547	2.69234	2.6916	2.67898	2.71387	2.74729	2.79047	2.81386	2.8263	2.8396	2.89751	2.93612	2.92696	2.93556	2.95623	2.97089	3.01822
Ssa1, Sis1 2 uM, Sse1 0.5 uM	0.7	0.706868	0.73471	0.7998	0.846451	0.894959	0.985045	1.08522	1.15959	1.27931	1.33883	1.43727	1.54629	1.60494	1.68822	1.77398	1.83603	1.8713	1.90397	1.93701	1.98855	2.08278	2.11817	2.14273	2.22044	2.20652	2.25348	2.26493	2.30496	2.33546	2.37599	2.37098	2.40519	2.45927	2.46762	2.49479	2.50289	2.54713	2.517	2.58834	2.58326	2.61061	2.62138	2.64155	2.60114	2.64507	2.67836	2.66599	2.7093
Ssa1, Sis1 2 uM, Sse1 1 uM	0.7	0.749312	0.766451	0.804688	0.883203	0.939878	0.976135	1.07395	1.16942	1.21082	1.26576	1.32441	1.38109	1.44154	1.4648	1.53298	1.52958	1.6037	1.6438	1.67176	1.73128	1.73691	1.7694	1.78864	1.81221	1.86047	1.79433	1.86177	1.89141	1.90378	1.90453	1.9367	1.95347	1.95891	1.97883	2.00637	2.02895	2.04399	2.07399	2.10709	2.1186	2.12516	2.12584	2.14168	2.13376	2.14292	2.16173	2.19031	2.17218
Ssa1, Sis1 2 uM, Sse1 2 uM	0.7	0.722274	0.744177	0.771339	0.840511	0.870334	0.90523	0.980899	0.990428	1.01474	1.08701	1.11504	1.11943	1.14746	1.18916	1.2162	1.27021	1.23829	1.28624	1.3194	1.3126	1.33932	1.3413	1.35801	1.4072	1.40361	1.41171	1.42935	1.46041	1.42663	1.44117	1.4794	1.49877	1.49407	1.49407	1.5255	1.51585	1.57883	1.5388	1.54418	1.5448	1.59065	1.56683	1.58607	1.61144	1.59523	1.59715	1.60234	1.61868
Ssa1, Sis1 2 uM, Sse1 4 uM	0.7	0.672096	0.663557	0.687254	0.712746	0.70464	0.727719	0.760511	0.756365	0.791261	0.781424	0.792994	0.7998	0.808957	0.823868	0.822507	0.834757	0.860929	0.87881	0.852886	0.872499	0.868106	0.868973	0.892732	0.893783	0.905848	0.903559	0.911541	0.904054	0.929422	0.921502	0.909437	0.950891	0.93004	0.927194	0.929607	0.936784	0.94557	0.951634	0.970628	0.940187	0.958935	0.96803	0.939507	0.931092	0.963204	0.942539	0.948416	0.951634
[truncated: 51 more columns]
