# Supplementary material for: Early steps of protein disaggregation by Hsp70 chaperone and class B J-domain proteins are shaped by Hsp110
Source: eLife. 2024 Oct 15;13:RP94795. doi: 10.7554/eLife.94795 (PMC11479587; doi:10.7554/eLife.94795)
Supplement: Figure 4—figure supplement 1—source data 5. [file elife-94795-fig4-figsupp1-data5.xlsx]

## Sheet: Figure 4—figure supplement 1E
Sis1 (µM)	0 Sse1			0.1 Sse1			0.5 Sse1			1 Sse1			2 Sse1
0.05	1.01611	0.964999	1.01889	1.02764	0.951366	1.021	0.967004	0.957117	1.07588	0.975991	0.978267	1.04574	1.05007	0.935034	1.01489
0.1	0.859486	0.93481	0.850476	0.998396	1.05546	0.906507	1.12384	1.09069	1.01231	1.26433	1.21435	1.03573	0.975085	1.05434	0.946599
0.25	0.749373	0.843543	0.746299	0.896635	0.963518	0.906835	1.10833	1.12878	1.03035	1.39535	1.21598	1.23523	1.22817	1.13176	1.2006
1	0.665103	0.742249	0.640722	0.898088	0.898775	0.861147	1.06298	1.04987	1.0292	1.43645	1.38204	1.32589	1.69296	1.40755	1.52137
2	0.616321	0.709305	0.600569	0.85971	0.952334	0.859726	1.06091	1.09493	0.994591	1.47934	1.36335	1.3093	1.84745	1.64506	1.71652
model fitting
Agonist vs. response -- Variable slope (3 parameters) [2]			Ambiguous
Best-fit values
Bottom	1.234	1.068	~ -33719	0.1446	0.9114
Top	0.6303	0.8732	1.071	1.401	2.107
logEC50	-1.115	-0.9742	~ -7,121	-1.633	-0.04694
EC50	0.07682	0.1061	~ 7,569e-008	0.02329	0.8976
Span	-0.6032	-0.1949	~ 33720	1.257	1.196
Std. Error
Bottom	0.1634	0.1138	~ 1,298e+011	1.476	0.05721
Top	0.0269	0.0287	0.02095	0.03865	0.2212
logEC50	0.2684	0.6771	~ 1,672e+006	0.7368	0.2293
Span	0.15	0.1005	~ 1,298e+011	1.454	0.1891
95% Confidence Intervals
Bottom	0,8775 to 1,590	0,8203 to 1,316	(Very wide)	-3,072 to 3,362	0,7868 to 1,036
Top	0,5717 to 0,6889	0,8107 to 0,9358	1,025 to 1,116	1,317 to 1,485	1,625 to 2,589
logEC50	-1,699 to -0,5298	-2,450 to 0,5013	(Very wide)	-3,238 to -0,02741	-0,5466 to 0,4528
EC50	0,01998 to 0,2953	0,003550 to 3,172	(Very wide)	0,0005777 to 0,9388	0,2840 to 2,836
Span	-0,9301 to -0,2764	-0,4139 to 0,02397	(Very wide)	-1,912 to 4,425	0,7836 to 1,608
Goodness of Fit
Degrees of Freedom	12	12	12	12	12
R square	0.908	0.5674	0.1282	0.81	0.9381
Absolute Sum of Squares	0.02594	0.02525	0.03524	0.0735	0.08772
Sy.x	0.0465	0.04587	0.05419	0.07826	0.0855
Number of points
Analyzed	15	15	15	15	15
