# Supplementary material for: Early steps of protein disaggregation by Hsp70 chaperone and class B J-domain proteins are shaped by Hsp110
Source: eLife. 2024 Oct 15;13:RP94795. doi: 10.7554/eLife.94795 (PMC11479587; doi:10.7554/eLife.94795)
Supplement: Figure 4—source data 1. [file elife-94795-fig4-data1.xlsx]

## Sheet: Fig. 4A
	1uM Ssa1 1uM Sse1			1uM Ssa1 0,75uM Sse1			1uM Ssa1 0,5uM Sse1			1uM Ssa1 0,25uM Sse1			1uM Ssa1 0,1uM Sse1			1uM Ssa1
0	0	0	0	0	0	0	0	0	0	0	0	0	0	0	0	0	0	0
0.003333	-0.00242	0.003229	0.002307	-0.00135	0.002438	-0.00381	-0.00425	7.34e-05	-0.00327	-0.00168	-0.0026	-0.00134	-0.00426	8.87e-05	-0.0071	-0.00549	-0.00139	-0.00256
0.006667	-0.00051	0.004025	0.007425	0.000307	-0.00204	0.000761	0.000941	0.005665	-0.00362	-0.00602	-0.00727	-0.00423	0.00062	-0.00274	-0.00457	-0.00424	5.34e-05	0.002609
0.01	-0.0027	0.00165	0.001209	-0.00672	-0.00035	0.002059	-0.00049	0.004885	-7.9e-05	-0.00413	-0.00118	-0.00372	-0.00122	0.002009	-0.00226	-0.00541	-0.00062	0.005469
0.013333	-0.00846	-0.00311	0.004448	-0.0017	7.73e-05	-2.1e-05	-0.00498	-0.00069	0.004437	-0.0075	-0.00352	-0.00128	-0.00231	-0.00335	-0.0009	-0.00157	-0.00159	0.00035
0.016667	-0.00547	0.002448	0.001836	-0.00737	4.67e-05	-0.00361	0.001865	-0.00164	-0.00208	-0.00969	-0.00124	-0.0062	0.001238	-0.00698	-0.00621	-0.00111	-0.00095	0.000788
0.02	-0.00898	-0.00215	0.007209	-0.00664	-0.00307	-0.00276	-0.00295	2.96e-05	-0.00097	-0.0107	-0.00688	-0.00246	-0.00515	0.00086	-0.00449	-0.00526	0.000523	0.002122
0.023333	-0.00563	-0.00592	0.000991	-0.00458	0.000962	-0.0011	0.001481	0.000436	5.82e-05	-0.00934	-0.00677	-0.0042	-0.00347	0.002311	-0.00248	-0.00346	0.000236	-0.00372
0.026667	-0.00903	-0.00317	0.000759	-0.00666	-0.00547	-0.00592	-0.00243	0.001145	0.003212	-0.00747	-0.00812	-0.00701	-0.00779	-0.00012	-0.00836	-0.00827	-0.00363	-0.00347
0.03	-0.00656	-0.0006	0.000297	-0.0068	-0.00053	-0.00347	-0.00436	-0.00178	-0.00165	-0.00676	-0.01069	-0.00836	-0.00199	-0.00362	-0.00751	-0.00859	-0.00582	-0.00067
0.033333	-0.00352	0.002894	8.77e-05	-0.0048	-0.00357	-0.00023	-0.00517	-0.00229	0.00245	-0.00877	-0.00231	-0.00441	-0.00438	-0.0013	-0.00727	-0.00237	-0.00289	0.001594
0.036667	-0.00692	0.003032	-0.0008	-0.0068	-0.00398	-0.01174	-0.00757	-0.00192	-0.00121	-0.00523	-0.00807	-0.00887	-0.0026	-0.00771	-0.00599	-0.00389	-0.00196	-0.00363
0.04	-0.00524	-0.00564	-0.0027	-0.00527	-0.00399	-0.00504	-0.00356	0.001585	-0.00497	-0.01025	-0.00583	-0.00333	-0.00505	-0.00124	-0.00631	-0.00503	-0.00644	0.002803
0.043333	-0.00849	-0.00312	0.000492	-0.00632	-0.00119	-0.00509	-0.00471	0.000666	0.000137	-0.01032	-0.00943	-0.01075	-0.00699	-0.00913	-0.0077	-0.01039	-0.00168	-0.00424
0.046667	-0.00436	-0.00022	0.0036	-0.0083	-0.00503	-0.00454	-0.00155	-0.00161	-0.00173	-0.00932	-0.00864	-0.0057	-0.00673	-0.0029	-0.00856	-0.01244	-0.00354	-0.0025
0.05	-0.0078	0.000847	0.003624	-0.00768	-0.00621	-0.0086	-0.00307	-0.00302	-0.00577	-0.00886	-0.00743	-0.01182	-0.00099	-0.0041	-0.00699	-0.01271	-0.00064	-0.00214
0.053333	-0.01261	-0.0017	0.001836	-0.01129	-0.00469	-0.00467	-0.00768	-0.00208	-0.00325	-0.00904	-0.00853	-0.00614	-0.00553	-0.00188	-0.00987	-0.00851	-0.00307	-0.00142
0.056667	-0.01041	-0.00239	0.000396	-0.01059	-0.00211	-0.00252	-0.0049	-0.00414	-0.00317	-0.00853	-0.00665	-0.00162	-0.00584	-0.00586	-0.00702	-0.01126	-0.00496	-0.00723
0.06	-0.01004	-0.00442	-0.00051	-0.00816	-0.00053	-0.00438	-0.00165	-0.00073	-0.00371	-0.00715	-0.00825	-0.00808	-0.00845	-0.00645	-0.00561	-0.01261	-0.00459	-0.00768
0.063333	-0.00685	-0.0076	0.003621	-0.00817	-0.00449	-0.0036	-0.00198	-0.00356	-0.00535	-0.01376	-0.00497	-0.00806	-0.01253	-0.00745	-0.0049	-0.01185	-0.00566	-0.00161
0.066667	-0.00994	-0.00133	-0.00363	-0.00825	-0.00484	-0.00784	-0.01038	0.000427	-0.00276	-0.01681	-0.00584	-0.0068	-0.01241	-0.01019	-0.00747	-0.01284	-0.00423	-0.00487
0.07	-0.01034	-0.00661	-0.00082	-0.01364	-0.00531	-0.00813	-0.00392	-0.0031	-0.00628	-0.01258	-0.00807	-0.01034	-0.00616	-0.00742	-0.00943	-0.00933	-0.0039	-0.00184
0.073333	-0.00756	-0.00283	-0.00113	-0.00916	-0.00709	-0.00692	-0.00486	-0.004	-0.0067	-0.0116	-0.00569	-0.008	-0.00496	-0.00805	-0.01125	-0.01481	-0.00286	-0.00506
0.076667	-0.01337	-0.00525	-0.00441	-0.01443	-0.00617	-0.0131	-0.00918	-0.00224	-0.00714	-0.01041	-0.00887	-0.01116	-0.0144	-0.00681	-0.00865	-0.01245	-0.00483	-0.00178
0.08	-0.01682	-0.00509	-0.0077	-0.01108	-0.00347	-0.01192	-0.00815	-0.00368	-0.00299	-0.01399	-0.00909	-0.00778	-0.0133	-0.00854	-0.00831	-0.01452	-0.00491	-0.0093
0.083333	-0.01116	-0.00463	-0.00206	-0.01481	-0.01338	-0.00874	-0.00438	-0.00735	-0.00722	-0.01625	-0.01048	-0.00709	-0.01224	-0.00808	-0.01332	-0.01219	-0.00564	-0.00483
0.086667	-0.01357	-0.00438	-0.00449	-0.0107	-0.00832	-0.00314	-0.01309	-0.00463	-0.00455	-0.01506	-0.01082	-0.00591	-0.01174	-0.01179	-0.00947	-0.01283	-0.00341	-0.00858
0.09	-0.0145	-0.00803	-0.00352	-0.0101	-0.00729	-0.00612	-0.01027	-0.00478	-0.00622	-0.01436	-0.01016	-0.00824	-0.00934	-0.0114	-0.00996	-0.01075	-0.00404	-0.00912
0.093333	-0.01296	-0.00245	-0.00683	-0.01206	-0.00424	-0.01262	-0.01047	-0.00687	-0.00655	-0.01271	-0.00404	-0.01203	-0.01067	-0.01208	-0.01576	-0.01402	-0.00598	-0.00737
0.096667	-0.01259	-0.00545	-0.00413	-0.01687	-0.00848	-0.00615	-0.01244	-0.00333	-0.00578	-0.01439	-0.01182	-0.01212	-0.01169	-0.00753	-0.01297	-0.01791	-0.00701	-0.00694
0.1	-0.01253	-0.00718	-0.00396	-0.01383	-0.01312	-0.00561	-0.00843	-0.00403	-0.00862	-0.01454	-0.01094	-0.01058	-0.00798	-0.01822	-0.00977	-0.01462	-0.01187	-0.00796
0.103333	-0.01242	-0.00675	-0.00196	-0.01454	-0.009	-0.00737	-0.01461	-0.00574	-0.00932	-0.01262	-0.00892	-0.00804	-0.01038	-0.01455	-0.01137	-0.01501	-0.00916	-0.00853
0.106667	-0.01506	-0.00631	-0.00858	-0.01527	-0.01091	-0.00546	-0.01188	-0.0068	-0.00685	-0.01554	-0.00795	-0.00772	-0.01244	-0.0139	-0.01011	-0.01624	-0.01398	-0.00484
0.11	-0.0147	-0.00864	-0.00624	-0.01532	-0.00639	-0.01676	-0.01492	-0.00786	-0.00541	-0.01337	-0.01076	-0.00877	-0.01111	-0.00979	-0.01533	-0.01025	-0.00831	-0.01009
0.113333	-0.0156	-0.00599	-0.00787	-0.01397	-0.00745	-0.01145	-0.01	-0.00974	-0.01371	-0.01797	-0.01307	-0.01141	-0.01493	-0.01126	-0.00898	-0.01727	-0.00807	-0.01607
0.116667	-0.01414	-0.00886	-0.0073	-0.01521	-0.00899	-0.00665	-0.0099	-0.00667	-0.01298	-0.01787	-0.01804	-0.00663	-0.01484	-0.01192	-0.0161	-0.01638	-0.009	-0.01138
0.12	-0.01226	-0.00875	-0.00628	-0.01417	-0.00416	-0.01182	-0.01241	-0.00835	-0.01197	-0.01963	-0.01028	-0.0141	-0.00805	-0.01329	-0.0131	-0.01748	-0.0064	-0.01198
0.123333	-0.02009	-0.01108	-0.00866	-0.01379	-0.01143	-0.01164	-0.0142	-0.00702	-0.00959	-0.01381	-0.01224	-0.0147	-0.00911	-0.00706	-0.02	-0.01943	-0.00846	-0.01008
0.126667	-0.01455	-0.00836	-0.006	-0.01682	-0.00868	-0.01301	-0.01432	-0.00949	-0.00785	-0.0163	-0.01285	-0.01267	-0.017	-0.0127	-0.01647	-0.01168	-0.01317	-0.00892
0.13	-0.01838	-0.00555	-0.00582	-0.01509	-0.00928	-0.01175	-0.01296	-0.00909	-0.00675	-0.01472	-0.01266	-0.01027	-0.01704	-0.01911	-0.01212	-0.01378	-0.00687	-0.00849
0.133333	-0.01479	-0.00887	-0.00627	-0.01577	-0.01105	-0.01164	-0.01416	-0.00799	-0.01115	-0.01581	-0.01483	-0.01511	-0.01419	-0.01441	-0.01589	-0.01506	-0.01226	-0.00986
0.136667	-0.01198	-0.01303	-0.00923	-0.01549	-0.00691	-0.01156	-0.01208	-0.01155	-0.01284	-0.01936	-0.01275	-0.00773	-0.01575	-0.0093	-0.01362	-0.01942	-0.01027	-0.00748
0.14	-0.01886	-0.00633	-0.01046	-0.02163	-0.00771	-0.01841	-0.01164	-0.00872	-0.00859	-0.02215	-0.01452	-0.01718	-0.01459	-0.01022	-0.015	-0.01676	-0.014	-0.01155
0.143333	-0.01649	-0.00809	-0.01196	-0.01805	-0.01003	-0.01285	-0.01655	-0.00941	-0.01267	-0.02055	-0.01635	-0.01202	-0.01393	-0.01257	-0.01363	-0.0223	-0.00889	-0.00588
0.146667	-0.01754	-0.00835	-0.01108	-0.01965	-0.01235	-0.00928	-0.01491	-0.00946	-0.00845	-0.01859	-0.01697	-0.01357	-0.01951	-0.00795	-0.01385	-0.01787	-0.01043	-0.00996
0.15	-0.01708	-0.0151	-0.00885	-0.01997	-0.01215	-0.01236	-0.01799	-0.01281	-0.00991	-0.01901	-0.01764	-0.01077	-0.0199	-0.01129	-0.02263	-0.01846	-0.01424	-0.01277
0.153333	-0.01809	-0.00921	-0.01204	-0.01837	-0.01648	-0.01746	-0.01646	-0.00959	-0.0072	-0.02193	-0.01583	-0.0182	-0.02064	-0.01664	-0.01258	-0.02069	-0.01026	-0.01338
0.156667	-0.01745	-0.00966	-0.0119	-0.02361	-0.01703	-0.01263	-0.01017	-0.00976	-0.01076	-0.02001	-0.01577	-0.01959	-0.01685	-0.01245	-0.01923	-0.01846	-0.01308	-0.01347
0.16	-0.01536	-0.01302	-0.01036	-0.0178	-0.01146	-0.00938	-0.01616	-0.01266	-0.01116	-0.01979	-0.01324	-0.01085	-0.01924	-0.01778	-0.01776	-0.01856	-0.01698	-0.01635
0.163333	-0.02132	-0.0107	-0.00875	-0.01807	-0.01117	-0.01506	-0.02006	-0.0134	-0.01083	-0.01441	-0.02171	-0.01323	-0.02064	-0.01453	-0.018	-0.02067	-0.01525	-0.01092
0.166667	-0.01268	-0.01172	-0.01001	-0.02322	-0.01704	-0.01071	-0.01584	-0.01403	-0.01065	-0.02035	-0.02028	-0.0178	-0.01634	-0.01761	-0.01432	-0.02585	-0.01331	-0.01122
0.17	-0.02285	-0.01554	-0.00951	-0.02195	-0.01337	-0.01408	-0.01806	-0.0148	-0.01135	-0.01834	-0.01273	-0.01603	-0.01984	-0.01713	-0.02317	-0.01837	-0.01297	-0.01098
0.173333	-0.01951	-0.01353	-0.01429	-0.01849	-0.01114	-0.01068	-0.01896	-0.01442	-0.01449	-0.02234	-0.01859	-0.01388	-0.02165	-0.01297	-0.02033	-0.02181	-0.01387	-0.01781
0.176667	-0.02364	-0.01539	-0.00807	-0.02309	-0.01421	-0.01414	-0.01629	-0.01449	-0.01493	-0.0234	-0.02061	-0.02163	-0.0173	-0.01736	-0.01889	-0.02706	-0.0148	-0.01319
0.18	-0.01796	-0.01228	-0.00975	-0.02139	-0.01256	-0.01358	-0.01836	-0.01437	-0.01187	-0.02775	-0.0176	-0.01716	-0.01545	-0.01774	-0.01639	-0.02147	-0.01596	-0.0174
0.183333	-0.0241	-0.01894	-0.00851	-0.02261	-0.01441	-0.01699	-0.01934	-0.01291	-0.01058	-0.02271	-0.01524	-0.01846	-0.02089	-0.02104	-0.02275	-0.0212	-0.01537	-0.01633
0.186667	-0.02214	-0.01034	-0.00856	-0.02234	-0.01933	-0.02099	-0.0196	-0.01549	-0.01688	-0.02289	-0.02352	-0.0182	-0.01598	-0.0182	-0.01764	-0.02174	-0.01282	-0.01235
0.19	-0.01754	-0.00833	-0.01262	-0.02105	-0.01574	-0.01826	-0.01581	-0.01376	-0.01319	-0.02271	-0.02081	-0.01819	-0.02395	-0.01957	-0.02251	-0.02419	-0.01793	-0.01575
0.193333	-0.01924	-0.01395	-0.01358	-0.01782	-0.01601	-0.01724	-0.02061	-0.01632	-0.0145	-0.02074	-0.01799	-0.01755	-0.02045	-0.01406	-0.02046	-0.02151	-0.01526	-0.01815
0.196667	-0.01876	-0.01525	-0.01561	-0.02053	-0.01708	-0.01835	-0.02289	-0.00935	-0.01581	-0.02627	-0.02141	-0.0199	-0.02315	-0.01887	-0.02356	-0.02179	-0.01686	-0.01057
0.2	-0.02015	-0.02032	-0.01268	-0.02166	-0.01692	-0.01687	-0.01788	-0.01217	-0.01366	-0.02203	-0.01705	-0.02261	-0.02085	-0.02344	-0.02336	-0.02451	-0.01815	-0.01361
0.203333	-0.02215	-0.01718	-0.00992	-0.02617	-0.01082	-0.01889	-0.02036	-0.01449	-0.01725	-0.02387	-0.01346	-0.01675	-0.02178	-0.01769	-0.02109	-0.02268	-0.02037	-0.01446
0.206667	-0.01925	-0.01588	-0.01796	-0.02624	-0.01486	-0.01751	-0.02162	-0.00961	-0.01421	-0.02589	-0.02058	-0.02381	-0.02828	-0.01804	-0.02524	-0.02595	-0.01938	-0.02091
0.21	-0.02293	-0.00956	-0.01304	-0.02851	-0.01476	-0.01788	-0.0172	-0.01488	-0.02014	-0.02515	-0.01846	-0.02404	-0.02013	-0.02426	-0.02416	-0.02215	-0.02112	-0.02007
0.213333	-0.01736	-0.0139	-0.0089	-0.01991	-0.01726	-0.02024	-0.02077	-0.01185	-0.01895	-0.0224	-0.0213	-0.0201	-0.0245	-0.02065	-0.01799	-0.02685	-0.0198	-0.01885
0.216667	-0.02055	-0.01132	-0.01497	-0.02461	-0.01804	-0.01901	-0.02429	-0.01857	-0.01984	-0.02316	-0.02284	-0.01965	-0.02155	-0.01884	-0.02646	-0.02607	-0.01893	-0.01652
0.22	-0.02363	-0.01856	-0.01497	-0.02339	-0.0156	-0.01877	-0.02234	-0.01762	-0.01945	-0.02509	-0.01724	-0.02115	-0.02592	-0.02016	-0.02288	-0.02705	-0.02047	-0.02051
0.223333	-0.02447	-0.01754	-0.01648	-0.02607	-0.01778	-0.01611	-0.02065	-0.01798	-0.01462	-0.02299	-0.02249	-0.02434	-0.02773	-0.02225	-0.02382	-0.02487	-0.02621	-0.0205
0.226667	-0.02155	-0.01655	-0.01596	-0.02357	-0.01487	-0.02037	-0.01741	-0.01727	-0.01392	-0.0256	-0.01762	-0.01943	-0.02385	-0.02103	-0.01979	-0.0272	-0.01745	-0.01729
0.23	-0.02348	-0.02039	-0.01786	-0.02334	-0.01557	-0.02313	-0.01982	-0.01909	-0.02321	-0.02409	-0.02044	-0.02108	-0.02735	-0.02078	-0.02109	-0.0287	-0.02159	-0.01852
0.233333	-0.02945	-0.01822	-0.01347	-0.02395	-0.01504	-0.01877	-0.02434	-0.0167	-0.01564	-0.03147	-0.02014	-0.0195	-0.02397	-0.02609	-0.02378	-0.02532	-0.02141	-0.02174
0.236667	-0.02665	-0.01246	-0.01375	-0.02487	-0.01806	-0.02281	-0.02199	-0.01801	-0.0203	-0.02207	-0.02077	-0.02215	-0.02717	-0.0202	-0.02305	-0.02919	-0.01985	-0.01932
0.24	-0.02789	-0.01639	-0.01524	-0.02994	-0.01544	-0.01992	-0.02658	-0.01898	-0.01845	-0.02618	-0.02138	-0.02137	-0.02731	-0.01811	-0.02542	-0.03087	-0.02282	-0.02449
0.243333	-0.02547	-0.01786	-0.01654	-0.02403	-0.01423	-0.01841	-0.0252	-0.01885	-0.01853	-0.03444	-0.02416	-0.02056	-0.02356	-0.02196	-0.02194	-0.02937	-0.01791	-0.021
0.246667	-0.02399	-0.02056	-0.01799	-0.02347	-0.01849	-0.02414	-0.02836	-0.02514	-0.015	-0.02683	-0.01887	-0.02537	-0.0249	-0.02617	-0.02302	-0.02454	-0.02231	-0.02297
0.25	-0.02643	-0.01765	-0.01588	-0.03002	-0.02347	-0.02363	-0.02605	-0.0192	-0.02229	-0.02682	-0.01735	-0.02328	-0.02523	-0.02273	-0.01864	-0.02634	-0.02589	-0.02337
0.253333	-0.02564	-0.01347	-0.01912	-0.02654	-0.01822	-0.02031	-0.02538	-0.01413	-0.01451	-0.02981	-0.02137	-0.02214	-0.03345	-0.03054	-0.02513	-0.02503	-0.02163	-0.0185
0.256667	-0.02566	-0.01877	-0.01304	-0.02617	-0.01605	-0.02582	-0.02529	-0.01776	-0.02339	-0.02713	-0.02334	-0.02341	-0.03134	-0.02462	-0.02601	-0.02633	-0.01985	-0.02225
0.26	-0.02644	-0.01414	-0.01488	-0.02822	-0.0168	-0.02377	-0.02607	-0.01836	-0.01862	-0.0303	-0.02024	-0.02162	-0.02734	-0.02335	-0.02455	-0.027	-0.02459	-0.02123
0.263333	-0.02903	-0.02354	-0.01159	-0.0281	-0.01949	-0.02662	-0.02692	-0.02243	-0.02057	-0.02344	-0.02678	-0.02055	-0.02892	-0.02336	-0.02293	-0.03598	-0.02613	-0.02203
0.266667	-0.03068	-0.0174	-0.01699	-0.02605	-0.01922	-0.02246	-0.02936	-0.02024	-0.0248	-0.03483	-0.02648	-0.02357	-0.02834	-0.0297	-0.02615	-0.02943	-0.02445	-0.02354
0.27	-0.03148	-0.02086	-0.01835	-0.02932	-0.02412	-0.02266	-0.02534	-0.02472	-0.01937	-0.03414	-0.02707	-0.02201	-0.02637	-0.02356	-0.02417	-0.02826	-0.02443	-0.01916
0.273333	-0.02415	-0.01888	-0.0223	-0.03205	-0.02078	-0.02487	-0.02283	-0.01918	-0.02149	-0.03408	-0.02104	-0.02189	-0.02734	-0.025	-0.02909	-0.02871	-0.02488	-0.02105
0.276667	-0.03079	-0.0213	-0.01587	-0.03024	-0.0213	-0.02537	-0.02806	-0.02091	-0.01844	-0.03146	-0.02628	-0.02086	-0.02914	-0.02526	-0.03186	-0.02693	-0.02614	-0.02672
0.28	-0.02885	-0.02124	-0.01921	-0.03406	-0.02019	-0.0253	-0.02617	-0.02459	-0.02056	-0.02966	-0.02475	-0.02735	-0.02456	-0.02733	-0.02911	-0.02687	-0.0241	-0.02478
0.283333	-0.02842	-0.01831	-0.02009	-0.02809	-0.01744	-0.0202	-0.02943	-0.02366	-0.02894	-0.03519	-0.02689	-0.02769	-0.03209	-0.02826	-0.02819	-0.03053	-0.0283	-0.02618
0.286667	-0.03098	-0.02043	-0.01765	-0.02319	-0.01946	-0.0219	-0.03232	-0.02222	-0.02286	-0.02875	-0.02254	-0.02507	-0.0312	-0.02767	-0.0318	-0.03123	-0.0292	-0.02035
0.29	-0.02675	-0.01783	-0.01899	-0.03527	-0.0228	-0.02259	-0.02747	-0.02209	-0.02606	-0.03709	-0.02652	-0.02799	-0.02911	-0.02212	-0.03204	-0.03419	-0.02081	-0.02378
0.293333	-0.02817	-0.01886	-0.0148	-0.03495	-0.02477	-0.02179	-0.0224	-0.02219	-0.02247	-0.03069	-0.02545	-0.02968	-0.03298	-0.03059	-0.03181	-0.03443	-0.02136	-0.02425
0.296667	-0.02818	-0.01709	-0.01679	-0.02975	-0.01965	-0.02785	-0.03209	-0.02701	-0.02551	-0.03263	-0.02482	-0.0251	-0.02729	-0.03241	-0.02955	-0.03042	-0.0289	-0.02696
0.3	-0.02857	-0.02462	-0.02289	-0.03299	-0.02084	-0.02713	-0.03256	-0.02425	-0.02618	-0.03057	-0.02864	-0.02446	-0.03267	-0.02621	-0.03015	-0.03317	-0.02257	-0.02559
0.303333	-0.03323	-0.01995	-0.01989	-0.02693	-0.02283	-0.02093	-0.02689	-0.02705	-0.02456	-0.04104	-0.02907	-0.02776	-0.03455	-0.02672	-0.03234	-0.03092	-0.0295	-0.02654
0.306667	-0.02989	-0.02276	-0.02433	-0.03197	-0.02292	-0.02661	-0.03208	-0.02372	-0.021	-0.0366	-0.02681	-0.02297	-0.03001	-0.03633	-0.02735	-0.03441	-0.03002	-0.02561
0.31	-0.03243	-0.02088	-0.02238	-0.03166	-0.02808	-0.02019	-0.03017	-0.01932	-0.02354	-0.03068	-0.02515	-0.02906	-0.0316	-0.03011	-0.02748	-0.03586	-0.02381	-0.02388
0.313333	-0.03416	-0.0248	-0.02076	-0.03384	-0.02298	-0.02213	-0.03156	-0.02386	-0.02439	-0.03474	-0.02807	-0.02784	-0.0296	-0.02714	-0.03254	-0.03751	-0.02967	-0.02526
0.316667	-0.03487	-0.02009	-0.023	-0.03143	-0.02377	-0.02241	-0.02952	-0.02362	-0.02519	-0.03449	-0.02491	-0.02659	-0.03688	-0.02899	-0.03873	-0.03504	-0.02653	-0.02828
0.32	-0.02771	-0.0257	-0.02145	-0.0354	-0.02286	-0.02485	-0.03257	-0.02616	-0.02574	-0.03472	-0.0303	-0.0287	-0.02716	-0.03103	-0.03389	-0.03261	-0.02574	-0.02195
0.323333	-0.02971	-0.02731	-0.01996	-0.03887	-0.0246	-0.02417	-0.02986	-0.02559	-0.02749	-0.03012	-0.0296	-0.02808	-0.03373	-0.03131	-0.02746	-0.03455	-0.02641	-0.02589
0.326667	-0.03598	-0.02119	-0.02477	-0.035	-0.03005	-0.02082	-0.03629	-0.02322	-0.02577	-0.03416	-0.02975	-0.03031	-0.03449	-0.03125	-0.03419	-0.03616	-0.02997	-0.02714
0.33	-0.03289	-0.02351	-0.0237	-0.03514	-0.0229	-0.02273	-0.03162	-0.02313	-0.02059	-0.03916	-0.03121	-0.02832	-0.03647	-0.03042	-0.03131	-0.03274	-0.02823	-0.02359
0.333333	-0.03136	-0.02575	-0.02216	-0.03213	-0.02099	-0.02564	-0.02829	-0.02642	-0.0289	-0.03406	-0.02895	-0.03075	-0.03178	-0.03051	-0.03419	-0.02915	-0.02638	-0.02821
0.336667	-0.03782	-0.0261	-0.02007	-0.03282	-0.02629	-0.02752	-0.03049	-0.02262	-0.02371	-0.02991	-0.02828	-0.02548	-0.03634	-0.03043	-0.03752	-0.03722	-0.02988	-0.02865
0.34	-0.03535	-0.02373	-0.02198	-0.03627	-0.0204	-0.02863	-0.0316	-0.02456	-0.02272	-0.03949	-0.03051	-0.02885	-0.03605	-0.02709	-0.03419	-0.03721	-0.02825	-0.02577
0.343333	-0.03367	-0.02281	-0.02396	-0.03988	-0.02834	-0.02971	-0.03245	-0.02672	-0.02956	-0.03442	-0.03057	-0.03129	-0.03464	-0.03122	-0.03141	-0.03698	-0.03037	-0.02387
0.346667	-0.03757	-0.02326	-0.02434	-0.03568	-0.02777	-0.03084	-0.03733	-0.02522	-0.02709	-0.03447	-0.03018	-0.02711	-0.03852	-0.02999	-0.03658	-0.03735	-0.02581	-0.02731
0.35	-0.04126	-0.02365	-0.02608	-0.03561	-0.02775	-0.03141	-0.03375	-0.02778	-0.0253	-0.04271	-0.02861	-0.02914	-0.03208	-0.03332	-0.03213	-0.03471	-0.03373	-0.02923
0.353333	-0.03638	-0.02833	-0.02583	-0.03887	-0.02742	-0.02523	-0.0403	-0.02997	-0.0317	-0.03733	-0.03481	-0.0326	-0.03421	-0.03429	-0.03356	-0.03789	-0.03201	-0.02741
0.356667	-0.03511	-0.02225	-0.02621	-0.03943	-0.02681	-0.03496	-0.03681	-0.0286	-0.02949	-0.03654	-0.02883	-0.03054	-0.03799	-0.02989	-0.04034	-0.03769	-0.02952	-0.03165
0.36	-0.0348	-0.02576	-0.02709	-0.03355	-0.02525	-0.02685	-0.03778	-0.02385	-0.02612	-0.0411	-0.03506	-0.02871	-0.03636	-0.02927	-0.03502	-0.04022	-0.03531	-0.02967
0.363333	-0.03846	-0.02828	-0.02621	-0.03663	-0.0273	-0.02726	-0.03517	-0.02997	-0.02637	-0.03504	-0.02976	-0.02925	-0.03583	-0.03203	-0.03907	-0.03893	-0.03176	-0.03031
0.366667	-0.0405	-0.02497	-0.02746	-0.03413	-0.02571	-0.02693	-0.03579	-0.02861	-0.03189	-0.04367	-0.02579	-0.03321	-0.04009	-0.03431	-0.03132	-0.03877	-0.03166	-0.03022
0.37	-0.04251	-0.0294	-0.02778	-0.03893	-0.02791	-0.02821	-0.03741	-0.02858	-0.03255	-0.0408	-0.03239	-0.03167	-0.03784	-0.03426	-0.03708	-0.03811	-0.03381	-0.02818
0.373333	-0.041	-0.03046	-0.02777	-0.04336	-0.02242	-0.02874	-0.03741	-0.03048	-0.03148	-0.04058	-0.03132	-0.03448	-0.03944	-0.0349	-0.0361	-0.03759	-0.03241	-0.03468
0.376667	-0.0383	-0.02337	-0.0272	-0.0369	-0.02518	-0.02972	-0.03586	-0.03346	-0.02703	-0.03431	-0.03636	-0.03061	-0.03341	-0.03438	-0.03263	-0.04076	-0.02824	-0.03625
0.38	-0.032	-0.02717	-0.02974	-0.03994	-0.02403	-0.03606	-0.03724	-0.03006	-0.02843	-0.04284	-0.03499	-0.03483	-0.04021	-0.03473	-0.03933	-0.04201	-0.03128	-0.03451
0.383333	-0.037	-0.0272	-0.02818	-0.03706	-0.03063	-0.02781	-0.03457	-0.0306	-0.02891	-0.04087	-0.03764	-0.03293	-0.04123	-0.03817	-0.03904	-0.04383	-0.03315	-0.03387
0.386667	-0.03694	-0.03179	-0.02635	-0.04152	-0.02999	-0.03349	-0.04103	-0.02998	-0.03276	-0.04069	-0.03401	-0.03337	-0.04319	-0.03423	-0.03637	-0.04417	-0.03342	-0.03085
0.39	-0.04315	-0.02593	-0.03157	-0.04189	-0.02783	-0.03681	-0.04074	-0.03391	-0.0296	-0.04403	-0.02676	-0.03265	-0.04253	-0.03856	-0.03175	-0.04119	-0.03502	-0.03406
0.393333	-0.03672	-0.032	-0.02822	-0.03993	-0.03051	-0.03652	-0.03771	-0.03625	-0.0333	-0.04118	-0.03617	-0.03312	-0.03848	-0.03722	-0.0394	-0.03965	-0.03461	-0.03576
0.396667	-0.03913	-0.02994	-0.02782	-0.03982	-0.03028	-0.02765	-0.04045	-0.02923	-0.02977	-0.03763	-0.03239	-0.03454	-0.0415	-0.03503	-0.04248	-0.04403	-0.03223	-0.03393
0.4	-0.0387	-0.02662	-0.02741	-0.03706	-0.02653	-0.03195	-0.03287	-0.03032	-0.02673	-0.04323	-0.03767	-0.04006	-0.04145	-0.03588	-0.03565	-0.04239	-0.03575	-0.03261
0.403333	-0.04141	-0.02891	-0.02833	-0.03652	-0.03338	-0.03152	-0.04034	-0.0288	-0.02689	-0.04419	-0.03529	-0.0351	-0.0437	-0.04198	-0.0393	-0.03986	-0.03718	-0.0344
0.406667	-0.03983	-0.03127	-0.02942	-0.03804	-0.03247	-0.03492	-0.03607	-0.02969	-0.03252	-0.042	-0.03482	-0.03563	-0.0381	-0.03546	-0.0389	-0.03846	-0.03639	-0.0322
0.41	-0.04464	-0.02622	-0.03115	-0.04649	-0.02888	-0.03546	-0.04213	-0.03466	-0.03091	-0.04097	-0.03509	-0.03817	-0.03951	-0.03755	-0.03919	-0.04314	-0.03464	-0.03324
0.413333	-0.03936	-0.02926	-0.02905	-0.04106	-0.02759	-0.03591	-0.04167	-0.03023	-0.02994	-0.04166	-0.03462	-0.03122	-0.05093	-0.03553	-0.03891	-0.04447	-0.03443	-0.03716
0.416667	-0.03871	-0.02871	-0.02325	-0.04321	-0.03304	-0.03061	-0.04079	-0.035	-0.03203	-0.04	-0.0405	-0.03862	-0.0409	-0.04124	-0.04138	-0.04811	-0.03631	-0.03384
0.42	-0.04334	-0.03163	-0.02982	-0.04201	-0.03435	-0.03382	-0.03758	-0.03143	-0.03134	-0.04189	-0.03762	-0.03652	-0.04625	-0.03862	-0.0427	-0.04513	-0.03717	-0.03484
0.423333	-0.04726	-0.02935	-0.02897	-0.04218	-0.03199	-0.03848	-0.04232	-0.0339	-0.03018	-0.0416	-0.03787	-0.03366	-0.04191	-0.04324	-0.04123	-0.04292	-0.03904	-0.03254
0.426667	-0.04425	-0.03255	-0.03348	-0.04681	-0.02616	-0.03742	-0.04112	-0.03408	-0.03528	-0.04413	-0.03703	-0.03689	-0.04607	-0.03866	-0.03813	-0.04318	-0.04069	-0.03325
0.43	-0.04549	-0.02978	-0.03238	-0.03504	-0.03448	-0.03634	-0.04097	-0.03804	-0.03233	-0.04375	-0.03737	-0.0432	-0.047	-0.03883	-0.04114	-0.04092	-0.04052	-0.03586
0.433333	-0.04383	-0.02784	-0.03323	-0.04561	-0.03328	-0.02948	-0.04171	-0.03254	-0.03182	-0.04924	-0.03339	-0.03811	-0.04576	-0.03653	-0.04282	-0.04661	-0.03609	-0.03542
0.436667	-0.04325	-0.02884	-0.02442	-0.04198	-0.03215	-0.03924	-0.04051	-0.03661	-0.03267	-0.043	-0.03578	-0.03528	-0.04493	-0.04205	-0.04322	-0.04572	-0.03513	-0.03689
0.44	-0.04336	-0.03354	-0.03004	-0.04231	-0.03512	-0.03602	-0.03811	-0.03411	-0.03401	-0.0409	-0.03285	-0.03888	-0.04875	-0.04266	-0.04144	-0.04601	-0.03235	-0.03796
0.443333	-0.0452	-0.03693	-0.03381	-0.04518	-0.02848	-0.03845	-0.04546	-0.03757	-0.03191	-0.0445	-0.03907	-0.04136	-0.04509	-0.04216	-0.03788	-0.04689	-0.03997	-0.04296
0.446667	-0.04094	-0.03615	-0.03637	-0.04748	-0.03117	-0.03498	-0.04217	-0.03379	-0.03159	-0.04643	-0.03627	-0.03855	-0.04818	-0.04192	-0.04568	-0.04386	-0.03534	-0.04313
0.45	-0.05019	-0.03201	-0.0351	-0.04213	-0.0328	-0.0368	-0.04041	-0.03712	-0.03609	-0.04307	-0.03636	-0.04001	-0.04629	-0.03804	-0.0419	-0.04763	-0.04172	-0.03632
0.453333	-0.04423	-0.032	-0.03632	-0.04762	-0.03308	-0.03608	-0.04453	-0.03449	-0.03492	-0.04398	-0.03537	-0.03514	-0.04534	-0.0394	-0.04608	-0.04631	-0.04009	-0.03998
0.456667	-0.04862	-0.03462	-0.0351	-0.04232	-0.03224	-0.04119	-0.04467	-0.03614	-0.03382	-0.04781	-0.04094	-0.04004	-0.04551	-0.0416	-0.04306	-0.05107	-0.03971	-0.03935
0.46	-0.04706	-0.03139	-0.03616	-0.04398	-0.03616	-0.03318	-0.04208	-0.03554	-0.03812	-0.04679	-0.03853	-0.03925	-0.05177	-0.04434	-0.04403	-0.05183	-0.0414	-0.04045
0.463333	-0.04769	-0.03248	-0.03563	-0.04846	-0.02912	-0.04011	-0.04152	-0.03695	-0.03425	-0.04506	-0.03809	-0.03924	-0.04431	-0.04575	-0.04335	-0.04876	-0.04216	-0.04005
0.466667	-0.04414	-0.03094	-0.03959	-0.04656	-0.03519	-0.03705	-0.04305	-0.03513	-0.03247	-0.04766	-0.0375	-0.04064	-0.04447	-0.04326	-0.04579	-0.04746	-0.04519	-0.03915
0.47	-0.04665	-0.03793	-0.03599	-0.04675	-0.03396	-0.03894	-0.04477	-0.03687	-0.03772	-0.04975	-0.03401	-0.03545	-0.04673	-0.04381	-0.04551	-0.049	-0.03952	-0.03834
0.473333	-0.0453	-0.03542	-0.03428	-0.0453	-0.03492	-0.03849	-0.04395	-0.03846	-0.03715	-0.04893	-0.04171	-0.0427	-0.04818	-0.048	-0.04513	-0.04922	-0.04059	-0.03687
0.476667	-0.04907	-0.02934	-0.03773	-0.0446	-0.0285	-0.03881	-0.04202	-0.03498	-0.03913	-0.05169	-0.03773	-0.03737	-0.0476	-0.04451	-0.04117	-0.04895	-0.04697	-0.04135
0.48	-0.04873	-0.03419	-0.03558	-0.04837	-0.03125	-0.03661	-0.04381	-0.0385	-0.03672	-0.04607	-0.04299	-0.03998	-0.04505	-0.04262	-0.04589	-0.05251	-0.04073	-0.03878
0.483333	-0.0488	-0.03601	-0.03845	-0.0481	-0.02952	-0.0364	-0.04412	-0.03843	-0.03366	-0.05068	-0.04014	-0.04172	-0.04451	-0.04646	-0.04833	-0.04727	-0.04668	-0.0333
0.486667	-0.04285	-0.03539	-0.03587	-0.04885	-0.03546	-0.043	-0.04349	-0.04424	-0.03416	-0.0553	-0.03861	-0.04236	-0.04996	-0.04637	-0.04531	-0.05193	-0.04075	-0.03867
0.49	-0.05001	-0.02946	-0.03452	-0.04901	-0.03611	-0.03553	-0.04324	-0.03891	-0.0358	-0.04825	-0.03642	-0.04199	-0.04531	-0.04593	-0.04935	-0.05238	-0.04508	-0.04132
0.493333	-0.04987	-0.03265	-0.03705	-0.04806	-0.03493	-0.04239	-0.04271	-0.03837	-0.03686	-0.05169	-0.03853	-0.04178	-0.04902	-0.04708	-0.04621	-0.04968	-0.04716	-0.03893
0.496667	-0.04889	-0.03747	-0.03719	-0.04802	-0.03184	-0.03895	-0.04274	-0.04022	-0.03512	-0.04994	-0.03954	-0.04187	-0.05103	-0.04884	-0.04962	-0.05022	-0.04627	-0.03875
0.5	-0.00413	0.033677	0.02841	-0.02199	0.019806	0.005126	-0.01296	0.030063	0.025459	-0.01267	0.037674	0.029232	-0.00316	0.001634	-0.00712	-0.00433	0.007897	-0.01273
0.503333	0.034301	0.059391	0.05801	0.016813	0.052126	0.036343	0.028199	0.056294	0.054303	0.022264	0.066606	0.055553	0.037171	0.032749	0.020957	0.033051	0.035111	0.024056
0.506667	0.062851	0.081728	0.075983	0.052019	0.07786	0.057915	0.061815	0.083513	0.079228	0.0519	0.08867	0.080524	0.072798	0.063849	0.048558	0.064098	0.065097	0.055907
0.51	0.086107	0.09961	0.093348	0.081042	0.098172	0.082591	0.090953	0.107805	0.099765	0.085077	0.105839	0.101371	0.100451	0.089627	0.074686	0.085935	0.087055	0.077312
0.513333	0.106463	0.115995	0.10755	0.0967	0.106462	0.101165	0.119313	0.126932	0.11576	0.106638	0.130204	0.11963	0.121448	0.112803	0.102779	0.109537	0.110763	0.093392
0.516667	0.127428	0.12889	0.124784	0.121415	0.129468	0.113142	0.141853	0.136086	0.137056	0.132234	0.142504	0.137023	0.150342	0.12714	0.123262	0.131942	0.127622	0.118264
0.52	0.149043	0.144811	0.141138	0.139056	0.142009	0.128099	0.159872	0.154979	0.147188	0.15965	0.160153	0.155066	0.168953	0.150496	0.143033	0.153518	0.146702	0.139857
0.523333	0.162292	0.158743	0.153283	0.15459	0.155198	0.143122	0.179631	0.176128	0.16745	0.174321	0.17581	0.16864	0.189613	0.171474	0.163684	0.172957	0.163655	0.157165
0.526667	0.17145	0.161585	0.161494	0.16992	0.165887	0.159031	0.203822	0.189341	0.179132	0.195161	0.192268	0.182749	0.215694	0.186494	0.176957	0.193947	0.18454	0.175447
0.53	0.186728	0.179873	0.168148	0.184722	0.177712	0.167692	0.221448	0.196689	0.196436	0.210433	0.203581	0.203652	0.232003	0.211553	0.201955	0.209886	0.202836	0.19814
0.533333	0.196609	0.188732	0.183035	0.197174	0.188259	0.178223	0.235307	0.214211	0.202535	0.229859	0.220957	0.217197	0.251892	0.226925	0.22143	0.237781	0.22224	0.216485
0.536667	0.209021	0.19658	0.191966	0.205976	0.196301	0.189939	0.253799	0.227391	0.215497	0.244861	0.233551	0.231052	0.282504	0.245499	0.242948	0.254084	0.240042	0.235995
0.54	0.216937	0.204978	0.202818	0.217608	0.208758	0.198722	0.265828	0.245651	0.230008	0.265592	0.244858	0.248123	0.303282	0.260834	0.258953	0.273707	0.263032	0.25107
0.543333	0.229846	0.212911	0.207891	0.232749	0.21596	0.205844	0.283326	0.256591	0.238651	0.28492	0.256813	0.259324	0.322086	0.283831	0.271269	0.291647	0.279327	0.275769
0.546667	0.245928	0.223932	0.220244	0.24988	0.225922	0.218066	0.299654	0.265096	0.251119	0.301077	0.279523	0.275917	0.346135	0.30697	0.293421	0.315203	0.300178	0.295115
0.55	0.255452	0.228547	0.224645	0.253646	0.223326	0.229007	0.321199	0.280192	0.264351	0.318341	0.292815	0.288594	0.362804	0.329247	0.312384	0.345786	0.315869	0.311224
0.553333	0.260963	0.241515	0.238124	0.266037	0.238	0.237537	0.335738	0.298547	0.271812	0.347007	0.309291	0.303911	0.393056	0.344778	0.334205	0.360791	0.335764	0.335389
0.556667	0.273459	0.245889	0.239871	0.277156	0.248244	0.248676	0.349515	0.30387	0.282648	0.36304	0.319813	0.316098	0.41842	0.363687	0.359203	0.39189	0.35633	0.353688
0.56	0.286575	0.250047	0.252821	0.291582	0.257646	0.258044	0.365352	0.317018	0.296932	0.379647	0.334427	0.333776	0.444549	0.385448	0.37674	0.416627	0.379557	0.375852
0.563333	0.287625	0.264079	0.261296	0.299245	0.267055	0.265432	0.381508	0.328241	0.310471	0.40214	0.350043	0.350095	0.464886	0.404211	0.396349	0.434961	0.403865	0.39806
0.566667	0.294458	0.268253	0.263485	0.312586	0.274211	0.267976	0.392176	0.339769	0.320411	0.411553	0.367302	0.362687	0.493262	0.43014	0.418837	0.458978	0.422931	0.42596
0.57	0.306588	0.274032	0.273486	0.320082	0.277654	0.279237	0.412987	0.350563	0.327325	0.438972	0.382677	0.378881	0.518699	0.448227	0.441485	0.48583	0.447422	0.445646
0.573333	0.314953	0.284092	0.278332	0.331873	0.288809	0.284981	0.428782	0.365566	0.341964	0.453925	0.392347	0.394453	0.546675	0.476618	0.460238	0.509467	0.470284	0.468399
0.576667	0.322121	0.292051	0.287846	0.339006	0.297678	0.297758	0.447985	0.374511	0.354761	0.481399	0.408562	0.413287	0.568834	0.493306	0.483244	0.538863	0.490262	0.494404
0.58	0.330679	0.290854	0.294848	0.351693	0.306595	0.304984	0.456506	0.389331	0.361342	0.501836	0.424599	0.427855	0.60002	0.519733	0.501382	0.566687	0.519511	0.516432
0.583333	0.338128	0.301023	0.296474	0.357557	0.30915	0.312011	0.469709	0.40278	0.36912	0.5172	0.44305	0.443381	0.622976	0.540314	0.527626	0.587945	0.541734	0.54355
0.586667	0.348093	0.30369	0.307697	0.366719	0.317465	0.319766	0.486534	0.413317	0.38235	0.540471	0.460229	0.458215	0.649455	0.565056	0.552038	0.612745	0.57022	0.564748
0.59	0.354177	0.315598	0.310534	0.38066	0.328701	0.326954	0.504503	0.423232	0.395349	0.560655	0.477701	0.475037	0.674781	0.59073	0.575465	0.64103	0.586823	0.586916
0.593333	0.368977	0.32073	0.322648	0.395991	0.338314	0.334942	0.517056	0.43802	0.404901	0.581629	0.486131	0.490294	0.69945	0.611063	0.600274	0.660745	0.617548	0.615776
0.596667	0.370273	0.332349	0.322207	0.401436	0.340974	0.341249	0.533723	0.449645	0.413252	0.601213	0.505408	0.510236	0.729378	0.633029	0.623479	0.695914	0.639704	0.64065
0.6	0.382118	0.331391	0.337267	0.412509	0.353493	0.353574	0.549255	0.461879	0.426791	0.626982	0.518752	0.527284	0.751086	0.658754	0.643971	0.72175	0.664878	0.6669
0.603333	0.38451	0.334103	0.339884	0.413964	0.355872	0.360339	0.561155	0.474073	0.435977	0.641095	0.531569	0.543753	0.77976	0.686244	0.672504	0.746799	0.687786	0.69131
0.606667	0.391594	0.343438	0.342122	0.42267	0.364954	0.363399	0.575686	0.488473	0.447709	0.665263	0.55211	0.554915	0.805137	0.709433	0.692496	0.768606	0.716126	0.712717
0.61	0.400417	0.346706	0.345662	0.439322	0.374053	0.373211	0.596504	0.489871	0.453868	0.682789	0.567024	0.570666	0.830111	0.733865	0.715719	0.798076	0.732589	0.744688
0.613333	0.401126	0.357606	0.353601	0.452349	0.382092	0.379335	0.604143	0.508039	0.468034	0.707185	0.58444	0.586843	0.863293	0.757764	0.742957	0.820052	0.760805	0.763914
0.616667	0.414968	0.36378	0.357928	0.451688	0.385324	0.388801	0.628341	0.515566	0.476743	0.724045	0.598101	0.603911	0.880337	0.780058	0.762087	0.846292	0.786895	0.790298
0.62	0.420502	0.363063	0.368002	0.465022	0.392713	0.387946	0.633128	0.530005	0.482287	0.744301	0.613999	0.620567	0.911992	0.804755	0.792423	0.868784	0.806399	0.815361
0.623333	0.425945	0.370968	0.370523	0.475584	0.400558	0.402898	0.654721	0.535162	0.501837	0.765911	0.628098	0.641384	0.933191	0.831914	0.809003	0.90058	0.834308	0.843923
0.626667	0.432052	0.379792	0.37991	0.483546	0.400117	0.405698	0.662489	0.555302	0.510671	0.783551	0.649024	0.658282	0.961367	0.852603	0.834135	0.925184	0.857305	0.867095
0.63	0.436391	0.383569	0.381397	0.494126	0.409948	0.410113	0.680586	0.562135	0.523901	0.806808	0.665508	0.668669	0.980643	0.871993	0.854217	0.950491	0.880806	0.895275
0.633333	0.448967	0.390806	0.386503	0.499498	0.417149	0.418455	0.693693	0.568838	0.526948	0.825994	0.678716	0.684309	1.01674	0.897317	0.876286	0.976752	0.909243	0.916324
0.636667	0.450164	0.387107	0.391235	0.507335	0.419561	0.430679	0.704727	0.58646	0.541576	0.846929	0.69542	0.699903	1.03609	0.919882	0.899781	1.00476	0.930482	0.943432
0.64	0.45516	0.397783	0.396379	0.517258	0.429505	0.433396	0.719721	0.599319	0.549164	0.868668	0.712052	0.718782	1.05927	0.947575	0.922382	1.02116	0.960649	0.963958
0.643333	0.460801	0.402438	0.400832	0.520776	0.434072	0.441207	0.728234	0.601037	0.562231	0.887177	0.725985	0.738874	1.08454	0.96956	0.942725	1.05487	0.985239	0.990971
0.646667	0.46687	0.408865	0.407022	0.531804	0.438994	0.445301	0.749402	0.624157	0.571748	0.901608	0.746443	0.749709	1.11017	0.993709	0.967621	1.0693	1.00617	1.01542
0.65	0.47823	0.413453	0.408909	0.535555	0.447485	0.450301	0.762145	0.628067	0.577905	0.926709	0.760173	0.7631	1.12742	1.0156	0.986683	1.10143	1.03043	1.03815
0.653333	0.481961	0.413204	0.41812	0.549609	0.454713	0.46388	0.774082	0.640843	0.590251	0.938507	0.77403	0.780389	1.16073	1.03666	1.0152	1.12827	1.0503	1.06238
0.656667	0.487477	0.421132	0.422708	0.561599	0.462741	0.467956	0.787245	0.654605	0.596399	0.96152	0.784398	0.801725	1.18083	1.06234	1.03236	1.14864	1.07653	1.08496
0.66	0.494963	0.424404	0.434235	0.558169	0.463338	0.470326	0.800498	0.666738	0.606795	0.972772	0.808072	0.812354	1.19977	1.0781	1.05504	1.17542	1.10054	1.11547
0.663333	0.499902	0.427263	0.433295	0.571997	0.473192	0.481141	0.81661	0.670744	0.61348	0.997883	0.822223	0.830313	1.22745	1.10799	1.07911	1.19939	1.11546	1.13381
0.666667	0.503894	0.438865	0.436631	0.576887	0.474072	0.484365	0.824591	0.686736	0.627689	1.01529	0.839868	0.842244	1.24889	1.1236	1.09518	1.21559	1.14791	1.16264
0.67	0.513577	0.443029	0.445013	0.585831	0.483168	0.492146	0.838291	0.691763	0.640248	1.03516	0.845503	0.861695	1.27028	1.14916	1.11895	1.24135	1.16956	1.18191
0.673333	0.516327	0.442178	0.447083	0.595194	0.487295	0.495827	0.850558	0.700212	0.645428	1.05021	0.859994	0.872869	1.30018	1.1681	1.13958	1.26509	1.19056	1.20304
0.676667	0.516341	0.450859	0.451622	0.604899	0.49059	0.506344	0.860413	0.718853	0.654949	1.07348	0.883789	0.891752	1.32002	1.19479	1.15762	1.28323	1.21509	1.22469
0.68	0.531427	0.454353	0.457326	0.610456	0.500856	0.507195	0.871015	0.722015	0.666611	1.08487	0.893501	0.901622	1.33692	1.21739	1.18471	1.30722	1.23627	1.25548
0.683333	0.53061	0.458413	0.464944	0.61583	0.506877	0.518927	0.885878	0.730348	0.676015	1.1053	0.908223	0.919503	1.3614	1.23422	1.20114	1.33264	1.25879	1.27366
0.686667	0.531119	0.459141	0.460739	0.626203	0.511768	0.522178	0.893919	0.746693	0.685181	1.12152	0.924091	0.935154	1.38567	1.25709	1.22956	1.35692	1.27907	1.29711
0.69	0.538301	0.466628	0.469101	0.634787	0.518693	0.529522	0.914072	0.755646	0.695288	1.13949	0.938263	0.946	1.40386	1.27914	1.24544	1.38082	1.30568	1.31899
0.693333	0.548222	0.476196	0.476277	0.643742	0.518847	0.528853	0.920127	0.768485	0.703727	1.15215	0.951345	0.960333	1.42707	1.30133	1.26641	1.39505	1.32413	1.34074
0.696667	0.558	0.474683	0.480352	0.64537	0.529007	0.545582	0.933611	0.772918	0.713625	1.17211	0.970765	0.975141	1.44789	1.31858	1.28557	1.42068	1.35162	1.36733
0.7	0.564412	0.477377	0.482364	0.653976	0.527575	0.545937	0.942672	0.786204	0.722661	1.18802	0.981757	0.992229	1.46676	1.33803	1.30097	1.43976	1.36759	1.38727
0.703333	0.560156	0.485091	0.48753	0.660685	0.534417	0.547382	0.951892	0.79813	0.728226	1.20575	0.993177	1.00614	1.485	1.36482	1.31977	1.46484	1.38911	1.4046
0.706667	0.570157	0.489277	0.4961	0.665582	0.541825	0.55478	0.97047	0.80503	0.733964	1.22397	1.00651	1.01709	1.50899	1.38061	1.3358	1.4812	1.40797	1.42697
0.71	0.569519	0.49692	0.497024	0.674299	0.546843	0.560861	0.981095	0.812979	0.746794	1.23507	1.03014	1.0338	1.53192	1.39909	1.35895	1.50143	1.42982	1.44891
0.713333	0.580767	0.495079	0.500009	0.684308	0.553827	0.573397	0.988947	0.823555	0.753805	1.25223	1.03971	1.05108	1.54681	1.42205	1.38032	1.52945	1.45495	1.46924
0.716667	0.580167	0.499667	0.504534	0.687234	0.558325	0.571647	0.999193	0.834761	0.770058	1.26716	1.04724	1.06169	1.56887	1.44223	1.40037	1.54762	1.47076	1.49496
0.72	0.583357	0.506332	0.512345	0.696316	0.56753	0.580521	1.01263	0.839253	0.770667	1.28321	1.06232	1.07619	1.58736	1.45969	1.41621	1.5632	1.49619	1.50949
0.723333	0.588827	0.512855	0.511335	0.701642	0.572453	0.583241	1.02198	0.854996	0.780595	1.2952	1.07821	1.08728	1.60465	1.47288	1.43593	1.58552	1.50848	1.52922
0.726667	0.590781	0.514585	0.518469	0.709502	0.574468	0.589303	1.02993	0.862039	0.786171	1.31406	1.08995	1.10001	1.6255	1.49418	1.45815	1.60883	1.5363	1.55636
0.73	0.606817	0.518636	0.520844	0.712197	0.581134	0.597245	1.04247	0.874604	0.801239	1.32891	1.10216	1.11996	1.64065	1.51297	1.47094	1.62672	1.55122	1.57462
0.733333	0.604697	0.520663	0.523193	0.717531	0.585204	0.60069	1.05438	0.8861	0.800861	1.34228	1.12149	1.1241	1.65651	1.53303	1.49249	1.64892	1.57374	1.59523
0.736667	0.608459	0.523528	0.527169	0.726959	0.586083	0.603533	1.06385	0.885844	0.812401	1.35638	1.13204	1.13835	1.67661	1.5541	1.5078	1.66816	1.58877	1.61109
0.74	0.612424	0.526221	0.527145	0.731316	0.595208	0.6106	1.0744	0.899697	0.826342	1.37383	1.14335	1.15594	1.70185	1.57057	1.52771	1.68331	1.61175	1.63179
0.743333	0.616427	0.534847	0.533913	0.735438	0.597363	0.611607	1.08023	0.905744	0.827567	1.38414	1.15718	1.16598	1.7089	1.58912	1.54191	1.70166	1.62473	1.65165
0.746667	0.624816	0.532053	0.541397	0.744174	0.601727	0.614838	1.09424	0.917657	0.841178	1.39536	1.16647	1.18428	1.72991	1.60838	1.55798	1.72393	1.64812	1.67502
0.75	0.624546	0.53955	0.542306	0.751371	0.609809	0.626108	1.10488	0.924582	0.846712	1.41179	1.17915	1.19636	1.75607	1.62203	1.57975	1.73706	1.67084	1.69126
0.753333	0.629348	0.540946	0.547372	0.753067	0.614337	0.631331	1.11457	0.937894	0.854708	1.42526	1.19305	1.20781	1.76619	1.64225	1.59755	1.76195	1.68745	1.70717
0.756667	0.637584	0.548051	0.551448	0.766301	0.620096	0.632627	1.12266	0.941634	0.859928	1.43854	1.2105	1.21575	1.77885	1.66452	1.60672	1.77699	1.70843	1.7269
0.76	0.639003	0.554032	0.554863	0.774031	0.621787	0.63734	1.13695	0.950875	0.875622	1.45582	1.21593	1.2375	1.79831	1.67454	1.62541	1.7971	1.72518	1.74438
0.763333	0.643886	0.551278	0.555881	0.773541	0.627865	0.644037	1.13971	0.957975	0.879601	1.46634	1.23622	1.24115	1.81432	1.69395	1.64399	1.80942	1.74577	1.76469
0.766667	0.647768	0.557434	0.563883	0.785193	0.631749	0.645842	1.15523	0.968291	0.887423	1.48578	1.24176	1.25445	1.83365	1.70741	1.6541	1.83131	1.75973	1.78014
0.77	0.654947	0.560826	0.564991	0.789382	0.641281	0.649981	1.16242	0.97468	0.892632	1.49836	1.25526	1.27037	1.84672	1.72477	1.67382	1.84731	1.7784	1.80094
0.773333	0.656291	0.567849	0.568438	0.794189	0.641017	0.65745	1.16652	0.988057	0.90244	1.50667	1.27079	1.2754	1.86215	1.74564	1.68389	1.8593	1.79763	1.82061
0.776667	0.659478	0.567638	0.571534	0.798303	0.645725	0.66503	1.17772	0.994496	0.90875	1.51984	1.27627	1.28945	1.87906	1.76033	1.70373	1.8815	1.81031	1.83839
0.78	0.669633	0.575666	0.57795	0.801124	0.649102	0.670291	1.18284	1.00515	0.917781	1.53391	1.29147	1.30935	1.89646	1.7799	1.71867	1.8951	1.8288	1.85644
0.783333	0.665346	0.578058	0.584007	0.807976	0.657046	0.675406	1.18876	1.01575	0.921976	1.54135	1.30193	1.31503	1.90995	1.79354	1.73566	1.918	1.84784	1.87799
0.786667	0.665846	0.579929	0.584845	0.812922	0.658339	0.679498	1.20621	1.02037	0.930976	1.55501	1.31434	1.33195	1.92542	1.80916	1.74661	1.93094	1.86404	1.89112
0.79	0.675262	0.582986	0.585563	0.819586	0.665097	0.683839	1.21385	1.03035	0.938318	1.56782	1.32727	1.34109	1.94086	1.81962	1.76391	1.94476	1.87946	1.90482
0.793333	0.679058	0.588311	0.594936	0.824335	0.67103	0.688714	1.21934	1.03552	0.94445	1.58141	1.33877	1.3538	1.95176	1.83526	1.77825	1.96636	1.89875	1.92437
0.796667	0.682737	0.591586	0.595981	0.828921	0.6752	0.689017	1.23107	1.04677	0.952377	1.58742	1.34237	1.36239	1.9705	1.84887	1.7977	1.98144	1.9097	1.93355
0.8	0.689657	0.590885	0.600359	0.833277	0.678897	0.695174	1.23253	1.04678	0.95972	1.60343	1.35715	1.37697	1.98447	1.86323	1.80691	1.99953	1.92745	1.95396
0.803333	0.690854	0.597416	0.603254	0.840673	0.685299	0.698148	1.24212	1.05499	0.968061	1.61347	1.36964	1.37719	1.999	1.88205	1.82478	2.01002	1.94557	1.97083
0.806667	0.694962	0.603245	0.606094	0.843497	0.685838	0.706405	1.25844	1.06572	0.973861	1.62712	1.37979	1.3994	2.00667	1.89872	1.83975	2.02588	1.96301	1.9875
0.81	0.695818	0.595912	0.607603	0.851336	0.695768	0.711025	1.26476	1.06802	0.984014	1.63402	1.38819	1.40816	2.02509	1.91309	1.85335	2.04165	1.9719	1.99931
0.813333	0.705351	0.607207	0.610543	0.851843	0.696319	0.714192	1.26956	1.08277	0.983727	1.64493	1.40109	1.41557	2.03744	1.92071	1.86347	2.05034	1.98918	2.01993
0.816667	0.709434	0.607899	0.61799	0.860895	0.703366	0.716491	1.27778	1.08794	0.995179	1.66055	1.41264	1.42465	2.05478	1.93654	1.87879	2.07114	2.00741	2.02834
0.82	0.710845	0.614672	0.618606	0.87194	0.706347	0.72401	1.28477	1.09378	1.00221	1.67222	1.4187	1.43328	2.0678	1.95016	1.89039	2.08258	2.01743	2.0503
0.823333	0.715672	0.617586	0.622669	0.871758	0.710914	0.728418	1.29626	1.10552	1.01085	1.68199	1.43286	1.44632	2.08306	1.96327	1.9073	2.09771	2.03514	2.06497
0.826667	0.713889	0.620748	0.624708	0.875018	0.715605	0.728068	1.29987	1.11025	1.01397	1.68592	1.44264	1.4552	2.0932	1.98392	1.91648	2.1153	2.05084	2.07863
0.83	0.717372	0.621746	0.629463	0.879484	0.720292	0.735602	1.30709	1.11832	1.02204	1.70001	1.45308	1.46822	2.11142	1.99481	1.92843	2.12737	2.06064	2.09641
0.833333	0.729656	0.62523	0.634911	0.883354	0.724767	0.740849	1.31557	1.12633	1.02744	1.71137	1.46079	1.47785	2.11751	2.00813	1.94343	2.13938	2.08011	2.10396
0.836667	0.731234	0.630463	0.639197	0.895381	0.723416	0.740866	1.32584	1.13888	1.03772	1.72108	1.47205	1.48673	2.1318	2.0204	1.95842	2.15706	2.0956	2.12075
0.84	0.730095	0.629834	0.634937	0.892709	0.735879	0.743016	1.33027	1.13681	1.04109	1.72719	1.48158	1.49695	2.1436	2.0318	1.96794	2.16629	2.11051	2.1393
0.843333	0.732815	0.634668	0.638416	0.900867	0.731678	0.754687	1.34046	1.15008	1.04983	1.74093	1.48732	1.50789	2.15765	2.04835	1.98249	2.18494	2.11972	2.15132
0.846667	0.734932	0.637713	0.642837	0.900214	0.738554	0.75231	1.34403	1.1535	1.05385	1.74822	1.49847	1.51162	2.16667	2.05938	1.98872	2.19442	2.13761	2.16113
0.85	0.741392	0.63419	0.648182	0.908664	0.739899	0.758757	1.35002	1.16064	1.06653	1.75617	1.50902	1.52499	2.17699	2.07241	2.01045	2.20935	2.14836	2.17106
0.853333	0.749763	0.640716	0.649472	0.914075	0.748396	0.761731	1.35971	1.16769	1.07005	1.7687	1.52106	1.53871	2.19214	2.08661	2.01662	2.21632	2.16372	2.18739
0.856667	0.74684	0.645492	0.656013	0.923453	0.75347	0.762275	1.36732	1.18158	1.07244	1.77655	1.52668	1.54577	2.20177	2.09932	2.02844	2.23499	2.17209	2.20695
0.86	0.748951	0.653824	0.650911	0.920371	0.752207	0.771708	1.37324	1.18279	1.08106	1.78878	1.53986	1.55398	2.21628	2.11012	2.0494	2.24984	2.18287	2.22023
0.863333	0.755681	0.650463	0.658557	0.926025	0.755776	0.7733	1.37578	1.18544	1.08891	1.79596	1.54595	1.56316	2.22543	2.12096	2.05094	2.26128	2.20312	2.23215
0.866667	0.754827	0.652289	0.663378	0.928877	0.759624	0.778272	1.38813	1.19815	1.09447	1.80524	1.54881	1.57416	2.23532	2.13472	2.06211	2.27177	2.21055	2.24247
0.87	0.762152	0.656748	0.662177	0.939641	0.767259	0.781078	1.39248	1.20038	1.10003	1.81382	1.57038	1.58261	2.24623	2.14395	2.0798	2.28529	2.22911	2.25581
0.873333	0.765049	0.660324	0.665493	0.942672	0.766377	0.790065	1.39899	1.20911	1.10531	1.82066	1.57175	1.58685	2.25681	2.15516	2.08616	2.29492	2.24077	2.26761
0.876667	0.772963	0.666043	0.672001	0.942979	0.768838	0.788011	1.40921	1.21886	1.10938	1.82898	1.57692	1.6019	2.26952	2.1656	2.09531	2.30707	2.24778	2.27774
0.88	0.771821	0.668944	0.674386	0.950184	0.776312	0.79431	1.40925	1.21997	1.11655	1.83723	1.59122	1.60606	2.27787	2.18036	2.11295	2.31744	2.26259	2.29429
0.883333	0.769753	0.672411	0.675201	0.954731	0.780043	0.795069	1.42151	1.22833	1.12532	1.84854	1.59689	1.62386	2.28928	2.19651	2.11893	2.33509	2.27589	2.30929
0.886667	0.776138	0.674	0.681618	0.957354	0.784554	0.800414	1.4243	1.23692	1.13098	1.86024	1.60482	1.62363	2.30448	2.20499	2.13414	2.34169	2.28162	2.32148
0.89	0.774949	0.676684	0.681047	0.964454	0.78817	0.801488	1.4328	1.24317	1.13795	1.86609	1.61807	1.63024	2.31147	2.2122	2.14576	2.34986	2.2976	2.32858
0.893333	0.784971	0.678327	0.682012	0.962465	0.792083	0.805431	1.43396	1.25009	1.14005	1.87746	1.62663	1.64274	2.32001	2.22664	2.15515	2.36872	2.30927	2.34276
0.896667	0.783982	0.682126	0.687901	0.968372	0.790616	0.813236	1.4426	1.25462	1.14584	1.87737	1.63298	1.65677	2.33477	2.23353	2.15999	2.37759	2.31996	2.34781
0.9	0.782712	0.686284	0.689764	0.971203	0.801877	0.816644	1.45001	1.26321	1.1503	1.89192	1.639	1.65722	2.33978	2.24384	2.17509	2.38552	2.32934	2.36316
0.903333	0.787869	0.685592	0.687098	0.976307	0.803017	0.818037	1.45747	1.2669	1.15667	1.89241	1.65348	1.66598	2.35113	2.25519	2.18402	2.40047	2.34417	2.37709
0.906667	0.793865	0.68863	0.696782	0.979628	0.805182	0.825418	1.46218	1.26948	1.16129	1.90699	1.65952	1.67047	2.35936	2.26819	2.19116	2.40682	2.35646	2.38518
0.91	0.800662	0.691291	0.697881	0.984575	0.809168	0.829729	1.4698	1.27334	1.16747	1.91015	1.66117	1.68325	2.37048	2.27425	2.20547	2.4223	2.36994	2.39529
0.913333	0.799434	0.694057	0.700054	0.986181	0.815189	0.828318	1.47253	1.28675	1.17373	1.92156	1.66889	1.68781	2.37597	2.28643	2.2139	2.42747	2.38273	2.40923
0.916667	0.798635	0.694746	0.703863	0.994139	0.816608	0.830928	1.47572	1.28496	1.18136	1.92772	1.68208	1.69633	2.38779	2.29836	2.21829	2.43595	2.3858	2.41745
0.92	0.804936	0.705898	0.708657	0.996019	0.825285	0.834739	1.48127	1.29417	1.18478	1.93304	1.68578	1.70619	2.39749	2.30775	2.23423	2.4434	2.40272	2.43279
0.923333	0.806454	0.704122	0.709449	0.997754	0.82145	0.842511	1.48843	1.30158	1.19406	1.94205	1.6907	1.71562	2.40867	2.31735	2.24685	2.45814	2.40872	2.44107
0.926667	0.806319	0.709416	0.712698	1.00462	0.82759	0.845082	1.49714	1.30759	1.19863	1.9513	1.69755	1.72378	2.41656	2.32751	2.25001	2.46948	2.42191	2.45092
0.93	0.813537	0.711167	0.718736	1.00922	0.833163	0.8467	1.50329	1.3115	1.20193	1.95388	1.70692	1.72934	2.43036	2.33477	2.26271	2.48087	2.4237	2.46219
0.933333	0.814429	0.714113	0.712468	1.01091	0.835725	0.851243	1.50855	1.31741	1.20474	1.96425	1.71961	1.7365	2.4336	2.34543	2.27103	2.48529	2.43881	2.46895
0.936667	0.813944	0.711666	0.7163	1.01335	0.834487	0.852311	1.51372	1.32486	1.21006	1.97297	1.71667	1.74448	2.4408	2.35379	2.27952	2.49779	2.44869	2.47921
0.94	0.821577	0.712847	0.719685	1.01912	0.843215	0.858331	1.51918	1.32949	1.21361	1.9765	1.73515	1.7503	2.44813	2.36092	2.28892	2.51155	2.46032	2.49006
0.943333	0.818822	0.717711	0.730704	1.01703	0.845533	0.858188	1.52331	1.33624	1.21985	1.98795	1.74172	1.7576	2.45559	2.37533	2.29703	2.51598	2.46429	2.50179
0.946667	0.821846	0.716589	0.724794	1.02444	0.847521	0.865883	1.52697	1.33556	1.2272	1.99532	1.74692	1.76803	2.4629	2.37672	2.30433	2.52274	2.4767	2.51846
0.95	0.831377	0.717625	0.72928	1.02786	0.856268	0.865095	1.5365	1.34696	1.2343	2.00211	1.75443	1.76905	2.47642	2.38723	2.31281	2.53705	2.48685	2.52333
0.953333	0.82739	0.729264	0.732293	1.03672	0.854686	0.869666	1.53678	1.34678	1.23916	2.00454	1.76272	1.77997	2.48557	2.40056	2.32158	2.54585	2.49951	2.53031
0.956667	0.828606	0.730565	0.734049	1.03811	0.854461	0.872398	1.54216	1.35527	1.2391	2.01739	1.76442	1.78653	2.48831	2.40439	2.32968	2.55189	2.5093	2.53378
0.96	0.83508	0.733753	0.740838	1.03936	0.861039	0.87772	1.54983	1.36577	1.24209	2.01482	1.7706	1.79549	2.49839	2.41281	2.33534	2.56354	2.51799	2.54525
0.963333	0.835999	0.729035	0.743456	1.04625	0.862321	0.885927	1.55482	1.36454	1.24976	2.02424	1.77862	1.80167	2.50732	2.42454	2.34856	2.57332	2.52134	2.55686
0.966667	0.838141	0.728889	0.741723	1.04447	0.863719	0.886353	1.55566	1.37061	1.25359	2.03222	1.78951	1.80511	2.51398	2.43077	2.35765	2.57804	2.53098	2.57117
0.97	0.840144	0.734654	0.744934	1.04468	0.87235	0.885194	1.56122	1.37513	1.25676	2.04102	1.79142	1.81271	2.52066	2.43695	2.35758	2.58377	2.5397	2.57281
0.973333	0.847934	0.740105	0.747811	1.05219	0.875259	0.891428	1.57371	1.38307	1.26309	2.0449	1.80102	1.81615	2.52627	2.45486	2.37011	2.59629	2.55313	2.58777
0.976667	0.848203	0.742723	0.749125	1.05914	0.876147	0.887737	1.57295	1.38676	1.26683	2.05203	1.80459	1.82927	2.53523	2.46096	2.37878	2.59914	2.56471	2.59141
0.98	0.847897	0.742362	0.750443	1.0612	0.875833	0.897561	1.58098	1.39169	1.27722	2.05488	1.81444	1.82983	2.54447	2.46529	2.38468	2.60738	2.56727	2.60072
0.983333	0.853539	0.744717	0.751158	1.0607	0.88292	0.89841	1.57904	1.40457	1.28223	2.05987	1.82039	1.83797	2.55082	2.4732	2.39126	2.61791	2.57331	2.60879
0.986667	0.854088	0.746405	0.755022	1.06539	0.881509	0.899232	1.58966	1.40578	1.28397	2.07189	1.82093	1.84708	2.55453	2.48207	2.40355	2.62794	2.58738	2.61819
0.99	0.858079	0.750064	0.755528	1.07269	0.890349	0.907545	1.59818	1.41223	1.28967	2.07152	1.83209	1.85391	2.56569	2.49035	2.40762	2.63549	2.59294	2.62395
0.993333	0.854012	0.752721	0.760756	1.07504	0.897544	0.905748	1.60065	1.41155	1.2877	2.08168	1.83734	1.86007	2.56933	2.49944	2.42123	2.64452	2.60005	2.63742
0.996667	0.862648	0.754773	0.761598	1.07871	0.893578	0.913625	1.60753	1.41932	1.29432	2.0901	1.83677	1.86442	2.58049	2.50291	2.42202	2.65047	2.61164	2.64042
1	0.864633	0.760075	0.76296	1.08363	0.903396	0.91292	1.60927	1.4223	1.30143	2.09375	1.84919	1.87237	2.58649	2.51064	2.43321	2.65452	2.61856	2.64698
1.00333	0.864126	0.761719	0.766301	1.0815	0.901701	0.914874	1.61514	1.4271	1.3043	2.09861	1.85312	1.8791	2.58826	2.51795	2.43347	2.66185	2.62173	2.65378
1.00667	0.864739	0.760155	0.772715	1.08608	0.904453	0.924039	1.61721	1.43728	1.30705	2.1013	1.86733	1.88067	2.59867	2.52711	2.44573	2.67537	2.63395	2.66602
1.01	0.872719	0.764928	0.769907	1.08768	0.9064	0.925805	1.61973	1.43833	1.31716	2.10866	1.86862	1.89204	2.60896	2.53364	2.44883	2.68084	2.63902	2.66898
1.01333	0.871979	0.766263	0.773114	1.08955	0.912438	0.922825	1.62435	1.44263	1.32367	2.11373	1.87176	1.89451	2.6148	2.54165	2.45778	2.68535	2.64584	2.67405
1.01667	0.878304	0.774013	0.77532	1.09518	0.909973	0.926018	1.6293	1.44662	1.32184	2.11529	1.88003	1.89596	2.61949	2.54603	2.46675	2.69022	2.65531	2.68758
1.02	0.877802	0.772616	0.77841	1.0934	0.912868	0.931148	1.63628	1.44891	1.32775	2.12588	1.88427	1.90227	2.62253	2.54859	2.4762	2.6984	2.66175	2.69766
1.02333	0.874213	0.771994	0.783629	1.09866	0.915213	0.938435	1.63988	1.45281	1.33397	2.12919	1.88907	1.91064	2.6328	2.55876	2.47666	2.70334	2.66822	2.70389
1.02667	0.873259	0.775173	0.782367	1.1003	0.920222	0.934093	1.63697	1.46226	1.33495	2.13488	1.89293	1.9189	2.6418	2.5678	2.48611	2.70749	2.67855	2.71623
1.03	0.883145	0.778038	0.783484	1.10874	0.921436	0.940124	1.64575	1.466	1.33777	2.14357	1.89712	1.92679	2.6422	2.57942	2.49489	2.7171	2.67998	2.71579
1.03333	0.884146	0.780612	0.785797	1.11025	0.930069	0.942513	1.64922	1.46669	1.34347	2.14592	1.90337	1.92546	2.65004	2.57831	2.49949	2.72307	2.69172	2.72242
1.03667	0.88484	0.781203	0.788537	1.11152	0.931997	0.945307	1.66153	1.47707	1.34578	2.14983	1.9119	1.93267	2.66102	2.5883	2.50781	2.73207	2.69646	2.73031
1.04	0.890148	0.786994	0.792195	1.11415	0.932104	0.94552	1.66066	1.47641	1.35191	2.15242	1.9209	1.93478	2.66448	2.59337	2.51355	2.73903	2.70369	2.73997
1.04333	0.888269	0.788366	0.792749	1.11721	0.942122	0.949996	1.66629	1.4833	1.35752	2.16338	1.91688	1.94279	2.66881	2.60426	2.51878	2.74662	2.70766	2.74319
1.04667	0.896168	0.79236	0.793944	1.11673	0.934946	0.958936	1.66509	1.48535	1.36053	2.16691	1.93314	1.94721	2.67983	2.61197	2.52749	2.75135	2.71757	2.75336
1.05	0.893472	0.788623	0.799886	1.12031	0.941904	0.953539	1.66574	1.49215	1.36492	2.17082	1.93788	1.95876	2.68232	2.60914	2.5356	2.75725	2.72024	2.75863
1.05333	0.896988	0.788297	0.797457	1.12161	0.94545	0.95584	1.67582	1.49254	1.36667	2.17487	1.9382	1.95855	2.68727	2.6219	2.5446	2.76467	2.7338	2.76168
1.05667	0.897869	0.799384	0.801085	1.13025	0.946248	0.96172	1.67774	1.50139	1.37094	2.1809	1.94186	1.96933	2.68978	2.62779	2.54548	2.76678	2.73713	2.76877
1.06	0.899039	0.791718	0.803897	1.1324	0.94702	0.963943	1.68157	1.50189	1.37589	2.18835	1.95021	1.97265	2.69841	2.63232	2.55219	2.7749	2.74059	2.77939
1.06333	0.904938	0.797192	0.803967	1.13299	0.950622	0.962641	1.68534	1.50756	1.38255	2.19312	1.95933	1.9789	2.7005	2.64149	2.55316	2.77804	2.74274	2.78214
1.06667	0.902055	0.802123	0.803932	1.13912	0.954366	0.970239	1.69108	1.50905	1.38586	2.19346	1.96241	1.98038	2.71076	2.64633	2.5618	2.78317	2.75577	2.78515
1.07	0.907381	0.798954	0.806647	1.14168	0.956275	0.970627	1.69323	1.51402	1.38834	2.1984	1.96752	1.98575	2.71201	2.65077	2.56737	2.78838	2.76236	2.79664
1.07333	0.909814	0.801925	0.807183	1.1445	0.963794	0.972303	1.69524	1.52148	1.3889	2.20328	1.97064	1.99103	2.72818	2.65585	2.57215	2.79763	2.76658	2.80254
1.07667	0.912404	0.80815	0.812959	1.13977	0.96214	0.974045	1.70233	1.52139	1.39789	2.20817	1.97667	1.99863	2.72533	2.66418	2.5811	2.80274	2.77346	2.80566
1.08	0.911457	0.811672	0.81381	1.14888	0.966884	0.97529	1.70758	1.53348	1.40156	2.21632	1.97864	1.99993	2.73327	2.6708	2.5877	2.80783	2.78203	2.81268
1.08333	0.914044	0.807901	0.819125	1.15115	0.971571	0.982298	1.71128	1.53225	1.40486	2.22662	1.9888	2.01136	2.73333	2.67711	2.59235	2.81563	2.78161	2.82301
1.08667	0.917559	0.815805	0.819734	1.14533	0.968991	0.981269	1.71451	1.53646	1.40473	2.22489	1.99208	2.01002	2.73468	2.67644	2.59524	2.82031	2.79208	2.82417
1.09	0.920927	0.812826	0.821754	1.15641	0.96831	0.986218	1.71755	1.5461	1.41009	2.22594	1.99449	2.01773	2.74571	2.68178	2.60154	2.8255	2.79775	2.83073
1.09333	0.923157	0.817647	0.820936	1.15344	0.975512	0.985895	1.71779	1.53933	1.41435	2.22855	1.99839	2.01989	2.75059	2.69007	2.60887	2.82868	2.80075	2.83286
1.09667	0.922305	0.820456	0.82784	1.16011	0.976036	0.995884	1.72395	1.55005	1.4191	2.23234	2.00701	2.02805	2.75869	2.69458	2.61088	2.8353	2.81319	2.83613
1.1	0.925344	0.822445	0.828932	1.15855	0.977891	0.994441	1.72507	1.55732	1.41805	2.24292	2.00764	2.0285	2.76433	2.70265	2.62033	2.84057	2.81191	2.84582
1.10333	0.923782	0.825511	0.826929	1.16381	0.984884	0.994627	1.72898	1.55441	1.42351	2.24345	2.01208	2.03034	2.76411	2.70577	2.62396	2.84326	2.81788	2.85405
1.10667	0.928226	0.826141	0.830529	1.16866	0.986588	1.00219	1.73276	1.56003	1.42867	2.24481	2.015	2.04014	2.76547	2.71463	2.62704	2.84643	2.82757	2.8591
1.11	0.92622	0.825833	0.831654	1.17281	0.992554	0.993656	1.73666	1.56392	1.4284	2.25199	2.0238	2.04497	2.77131	2.71936	2.63476	2.85361	2.83221	2.8618
1.11333	0.931429	0.823194	0.837474	1.16725	0.986114	0.996177	1.7409	1.56602	1.4352	2.25221	2.02085	2.04937	2.7783	2.72209	2.63674	2.85897	2.83848	2.86917
1.11667	0.93509	0.826398	0.836484	1.17207	0.996551	1.00503	1.74297	1.56746	1.44024	2.25813	2.03217	2.05051	2.78294	2.7299	2.64419	2.86707	2.83956	2.86904
1.12	0.930444	0.827017	0.838676	1.1705	0.993469	1.00808	1.75181	1.5768	1.43719	2.26647	2.03435	2.05541	2.78965	2.7335	2.64871	2.87004	2.84736	2.87771
1.12333	0.936758	0.834094	0.838768	1.1812	1.00072	1.00701	1.74529	1.57776	1.4443	2.26538	2.0382	2.06165	2.78773	2.7375	2.65027	2.8776	2.84828	2.88681
1.12667	0.938574	0.833776	0.844437	1.18263	1.0009	1.01528	1.75372	1.58008	1.44789	2.26904	2.04017	2.06334	2.80489	2.74203	2.65891	2.87797	2.85481	2.8935
1.13	0.941133	0.832572	0.844045	1.18156	1.0043	1.01657	1.76191	1.57912	1.45088	2.27285	2.04827	2.06618	2.79881	2.75344	2.66255	2.88071	2.86564	2.89918
1.13333	0.939805	0.837506	0.84351	1.18168	1.00525	1.01752	1.76322	1.58859	1.4562	2.27959	2.05091	2.07582	2.81407	2.75259	2.66732	2.89122	2.85972	2.90191
1.13667	0.943483	0.840095	0.847402	1.18739	1.01026	1.01737	1.76178	1.58978	1.45935	2.28392	2.05608	2.08187	2.8081	2.75732	2.67547	2.89115	2.86931	2.90443
1.14	0.943445	0.844072	0.848872	1.1931	1.00544	1.02037	1.76704	1.59829	1.45996	2.27996	2.06032	2.08228	2.81587	2.76619	2.67333	2.89808	2.87565	2.90979
1.14333	0.945186	0.83985	0.853453	1.1961	1.01489	1.02257	1.76652	1.60043	1.46271	2.28745	2.0652	2.09019	2.82569	2.77013	2.6843	2.9013	2.87768	2.92006
1.14667	0.947626	0.842413	0.851684	1.19654	1.01446	1.0248	1.77168	1.60262	1.46421	2.29233	2.06238	2.09187	2.82666	2.77097	2.685	2.90506	2.8843	2.9207
1.15	0.952896	0.849588	0.853832	1.19506	1.01838	1.02567	1.77546	1.60264	1.47117	2.29974	2.07241	2.09676	2.82564	2.77252	2.6889	2.914	2.88568	2.91988
1.15333	0.950552	0.84507	0.85771	1.199	1.01944	1.02912	1.7713	1.60868	1.47368	2.3046	2.07986	2.09763	2.83399	2.77976	2.69531	2.91291	2.89292	2.92755
1.15667	0.951883	0.850018	0.861116	1.20199	1.02365	1.03239	1.78067	1.61518	1.47762	2.30337	2.07994	2.10142	2.83421	2.78915	2.6984	2.91916	2.89034	2.93167
1.16	0.953783	0.849173	0.856057	1.20214	1.02261	1.03551	1.78192	1.61902	1.48412	2.30295	2.08024	2.10774	2.83942	2.79392	2.7074	2.92309	2.90565	2.93609
1.16333	0.954052	0.855975	0.861469	1.2055	1.02622	1.03816	1.7885	1.61695	1.48445	2.30907	2.09015	2.11074	2.84321	2.79624	2.71159	2.92734	2.90581	2.94014
1.16667	0.960652	0.853079	0.863952	1.20674	1.02985	1.03815	1.79391	1.625	1.49142	2.31263	2.09595	2.11563	2.85043	2.79746	2.7133	2.93469	2.90886	2.94275
1.17	0.955877	0.858553	0.863035	1.20531	1.03123	1.0394	1.78675	1.62709	1.4892	2.32088	2.09813	2.12042	2.8532	2.80177	2.7141	2.93485	2.91867	2.94751
1.17333	0.964205	0.858423	0.871064	1.21108	1.03357	1.04499	1.79662	1.62927	1.49362	2.31914	2.09851	2.12493	2.84774	2.81211	2.72228	2.9374	2.91751	2.95971
1.17667	0.96376	0.857039	0.871172	1.21482	1.03607	1.04745	1.79751	1.6376	1.4944	2.32475	2.10059	2.12654	2.85704	2.81689	2.72432	2.94806	2.9263	2.95376
1.18	0.96441	0.865189	0.870488	1.21711	1.03561	1.04897	1.80322	1.63805	1.50168	2.32959	2.10545	2.12499	2.86258	2.81954	2.73179	2.94807	2.93044	2.96756
1.18333	0.967979	0.862575	0.869171	1.21684	1.03913	1.04683	1.81181	1.64218	1.50025	2.3295	2.11465	2.13524	2.86401	2.82426	2.73922	2.95266	2.93352	2.96211
1.18667	0.966979	0.863484	0.867503	1.21592	1.0448	1.05294	1.81019	1.6378	1.50602	2.33681	2.10734	2.13804	2.87243	2.82031	2.74256	2.95192	2.93543	2.97439
1.19	0.967854	0.868403	0.873598	1.22068	1.04278	1.05242	1.81235	1.64397	1.50885	2.3373	2.11826	2.14411	2.8717	2.82832	2.74109	2.95894	2.94293	2.97704
1.19333	0.970647	0.865899	0.876818	1.2223	1.04745	1.05296	1.81324	1.64916	1.50963	2.34396	2.12257	2.14317	2.88122	2.83123	2.74293	2.95511	2.94416	2.97856
1.19667	0.970699	0.872635	0.879183	1.22549	1.04941	1.05801	1.81343	1.64769	1.5154	2.34477	2.12431	2.14739	2.88538	2.83478	2.75065	2.96459	2.94943	2.98573
1.2	0.973848	0.869185	0.876729	1.22613	1.05384	1.05964	1.82281	1.64842	1.52167	2.34539	2.1304	2.15433	2.88252	2.84124	2.74969	2.96885	2.94674	2.98685
1.20333	0.973038	0.873622	0.877182	1.22671	1.05209	1.06286	1.82101	1.65831	1.51687	2.35225	2.13556	2.16389	2.88947	2.84682	2.75948	2.97326	2.95246	2.99045
1.20667	0.971907	0.87324	0.880068	1.2309	1.05771	1.06162	1.8274	1.65947	1.51531	2.35468	2.13857	2.16032	2.89203	2.84931	2.76286	2.97647	2.95684	2.99102
1.21	0.980427	0.871985	0.889603	1.23445	1.05805	1.06406	1.82903	1.66378	1.52294	2.35623	2.14024	2.16257	2.89146	2.85087	2.76131	2.98486	2.96858	3.00098
1.21333	0.981189	0.874873	0.884504	1.23395	1.05943	1.06939	1.82782	1.66225	1.52902	2.36318	2.13819	2.16124	2.89631	2.85904	2.7758	2.98689	2.96335	3.00345
1.21667	0.979782	0.874877	0.887923	1.23624	1.06004	1.07004	1.83102	1.66917	1.53111	2.36733	2.14766	2.17102	2.90309	2.86069	2.7727	2.98678	2.96925	3.00368
1.22	0.988493	0.878562	0.887753	1.24033	1.06047	1.07332	1.82972	1.66941	1.53298	2.36783	2.14982	2.17711	2.90581	2.86192	2.77933	2.98839	2.97772	3.0106
1.22333	0.97521	0.88428	0.889746	1.24052	1.06589	1.0707	1.8367	1.67745	1.5384	2.37143	2.1533	2.1795	2.911	2.87216	2.78213	2.99865	2.97876	3.01252
1.22667	0.986355	0.884368	0.892691	1.24028	1.06197	1.0768	1.8384	1.67875	1.53599	2.36735	2.1541	2.18236	2.90942	2.87145	2.78133	2.99371	2.98336	3.01753
1.23	0.990301	0.886004	0.89154	1.24126	1.06886	1.07592	1.84196	1.68576	1.53978	2.37558	2.16142	2.18122	2.90926	2.87196	2.78356	3.00056	2.98736	3.02157
1.23333	0.988578	0.888	0.889784	1.24429	1.07024	1.0783	1.84786	1.68564	1.54526	2.37786	2.16432	2.1864	2.91366	2.87742	2.79034	3.00471	2.99246	3.0256
1.23667	0.986038	0.888612	0.897639	1.24649	1.07072	1.08614	1.84341	1.68773	1.54729	2.3851	2.1641	2.19165	2.9236	2.87993	2.80317	3.01001	2.99534	3.0231
1.24	0.994602	0.889951	0.898059	1.24669	1.07048	1.08447	1.85153	1.68991	1.55248	2.38474	2.16916	2.18943	2.92462	2.88658	2.80079	3.01527	2.99625	3.02576
1.24333	0.990112	0.889993	0.89713	1.2513	1.07689	1.08667	1.85752	1.6906	1.55026	2.38618	2.17365	2.19747	2.92423	2.89081	2.80663	3.0126	3.00162	3.03378
1.24667	0.99691	0.895083	0.902985	1.25329	1.08067	1.08434	1.8554	1.69661	1.55191	2.39484	2.17008	2.20368	2.92431	2.89241	2.80399	3.01563	3.0028	3.03457
1.25	0.997848	0.892541	0.903224	1.25512	1.07879	1.08751	1.85247	1.69864	1.55397	2.39615	2.18019	2.20494	2.9328	2.89318	2.80679	3.02821	3.00974	3.03968
1.25333	0.998964	0.898195	0.90129	1.25896	1.08749	1.09156	1.85605	1.7011	1.55929	2.39411	2.1791	2.20743	2.93632	2.8931	2.81337	3.02142	3.00603	3.04485
1.25667	0.994815	0.896416	0.907515	1.25714	1.08496	1.091	1.85968	1.70249	1.56329	2.39648	2.18533	2.20801	2.93798	2.89958	2.81498	3.02672	3.01219	3.05149
1.26	0.997245	0.896248	0.906974	1.25819	1.09133	1.09141	1.8616	1.70446	1.56188	2.40166	2.18255	2.21089	2.9414	2.90547	2.81861	3.03221	3.01444	3.0526
1.26333	1.00064	0.897327	0.907613	1.26431	1.08609	1.09613	1.8688	1.71062	1.56954	2.40027	2.18816	2.21596	2.9443	2.90506	2.82757	3.02919	3.0218	3.05933
1.26667	1.00029	0.900238	0.910423	1.26456	1.09209	1.09953	1.8715	1.71417	1.56742	2.40215	2.19062	2.21561	2.94689	2.91456	2.82616	3.03939	3.02146	3.05615
1.27	0.999746	0.904667	0.913622	1.26855	1.09775	1.10095	1.86742	1.71363	1.5706	2.4128	2.19567	2.22045	2.94942	2.91109	2.82342	3.04195	3.0253	3.06481
1.27333	1.00368	0.905736	0.912385	1.26833	1.09092	1.09842	1.86969	1.71659	1.57691	2.41334	2.20254	2.22394	2.94823	2.91297	2.83043	3.04178	3.0268	3.06424
1.27667	1.00453	0.902277	0.910402	1.26819	1.09959	1.09883	1.86954	1.71701	1.57755	2.4121	2.20211	2.22875	2.95763	2.91878	2.83605	3.04577	3.03589	3.06664
1.28	1.00561	0.912321	0.920323	1.26786	1.09523	1.1014	1.87212	1.71919	1.57915	2.41491	2.20361	2.22607	2.96301	2.91569	2.83663	3.04752	3.03625	3.0762
1.28333	1.00508	0.908203	0.918424	1.27039	1.10065	1.1096	1.88142	1.72506	1.58384	2.42402	2.20659	2.23199	2.96239	2.92916	2.83715	3.04764	3.03518	3.07313
1.28667	1.01016	0.911989	0.915194	1.27499	1.10209	1.10654	1.88161	1.72796	1.58485	2.42034	2.21268	2.23466	2.96239	2.92972	2.84438	3.05648	3.04406	3.07351
1.29	1.00779	0.909141	0.922824	1.27355	1.10284	1.10949	1.88314	1.72935	1.59048	2.42063	2.21667	2.23513	2.97062	2.93551	2.84864	3.05174	3.03728	3.07564
1.29333	1.01057	0.910166	0.917195	1.27802	1.10634	1.11147	1.88719	1.72846	1.58932	2.42798	2.21078	2.23888	2.96807	2.94118	2.85158	3.05278	3.04343	3.07788
1.29667	1.0162	0.91528	0.924169	1.28174	1.10679	1.11458	1.88603	1.73615	1.59294	2.42792	2.2203	2.23985	2.96768	2.93839	2.85633	3.06277	3.05088	3.0817
1.3	1.01186	0.917289	0.927966	1.27919	1.11275	1.11757	1.89347	1.73435	1.59217	2.42464	2.22217	2.24439	2.9718	2.93928	2.85309	3.05958	3.05002	3.08516
1.30333	1.02027	0.912794	0.925586	1.28528	1.1095	1.11581	1.89512	1.73749	1.59769	2.43435	2.2267	2.24605	2.97258	2.94511	2.86019	3.06572	3.05247	3.08582
1.30667	1.01543	0.920092	0.930616	1.28406	1.1124	1.11816	1.89597	1.73866	1.5998	2.43232	2.22603	2.25452	2.97713	2.9478	2.86031	3.0615	3.0565	3.09774
1.31	1.01542	0.919827	0.929886	1.28887	1.11847	1.1222	1.89627	1.74706	1.60121	2.44101	2.23393	2.2535	2.9786	2.95046	2.86451	3.06636	3.06431	3.09545
1.31333	1.01838	0.922264	0.929512	1.2852	1.11635	1.12504	1.8972	1.7461	1.60128	2.4499	2.23793	2.25773	2.98004	2.95457	2.87096	3.07239	3.06193	3.09919
1.31667	1.01847	0.921631	0.932806	1.29038	1.11616	1.12606	1.90268	1.74613	1.60861	2.4435	2.23583	2.26337	2.98438	2.95439	2.86329	3.07329	3.06624	3.09982
1.32	1.02555	0.92219	0.936638	1.29078	1.12218	1.12489	1.90338	1.74853	1.60947	2.44846	2.23688	2.26449	2.9863	2.95919	2.87267	3.08069	3.0684	3.10382
1.32333	1.02276	0.922512	0.935185	1.28549	1.12247	1.12892	1.90727	1.75187	1.60829	2.44782	2.24001	2.26705	2.99027	2.96297	2.87507	3.0802	3.07023	3.10709
1.32667	1.02633	0.928798	0.933796	1.2951	1.12316	1.12617	1.90581	1.7561	1.61552	2.4478	2.23381	2.26759	2.99433	2.96307	2.88072	3.08149	3.07948	3.10964
1.33	1.02147	0.930742	0.942408	1.29585	1.13224	1.12986	1.90766	1.75623	1.61464	2.44964	2.25149	2.27285	2.99027	2.97005	2.88355	3.08245	3.07348	3.11129
1.33333	1.02501	0.933489	0.937114	1.29248	1.12578	1.13387	1.90796	1.76121	1.62034	2.45512	2.25061	2.27209	2.99584	2.97008	2.88141	3.08813	3.07987	3.11391
1.33667	1.02797	0.932866	0.937198	1.29752	1.12633	1.12955	1.91471	1.75668	1.61938	2.45711	2.25044	2.2809	2.99687	2.97153	2.8868	3.08994	3.0774	3.11695
1.34	1.02576	0.932531	0.940007	1.30208	1.13368	1.13373	1.9152	1.76444	1.61497	2.46164	2.25117	2.27955	2.99478	2.97114	2.884	3.09461	3.08287	3.12054
1.34333	1.02543	0.93209	0.946501	1.30094	1.13577	1.13547	1.91367	1.76491	1.62132	2.46216	2.2611	2.27946	3.00628	2.97772	2.88848	3.09704	3.08721	3.12186
1.34667	1.03233	0.936666	0.945977	1.30458	1.13423	1.13745	1.92499	1.76425	1.62528	2.4608	2.26097	2.28376	3.00735	2.9795	2.89344	3.09779	3.09108	3.1252
1.35	1.03048	0.934006	0.949368	1.30446	1.13564	1.14165	1.91902	1.7754	1.62361	2.46461	2.26148	2.28662	3.0046	2.97835	2.89319	3.09857	3.09058	3.12896
1.35333	1.02779	0.937971	0.946146	1.30419	1.14159	1.13948	1.9269	1.77084	1.63102	2.47312	2.26294	2.28725	3.00658	2.98408	2.90062	3.10493	3.09579	3.12926
1.35667	1.04213	0.940557	0.950379	1.30237	1.13847	1.1415	1.92261	1.77509	1.635	2.474	2.26749	2.29409	3.01159	2.98461	2.90175	3.09937	3.09603	3.12668
1.36	1.03364	0.939882	0.947084	1.30991	1.14549	1.14377	1.92652	1.77504	1.63053	2.47224	2.27048	2.29174	3.01141	2.98576	2.90609	3.10325	3.09965	3.13214
1.36333	1.03791	0.942246	0.946305	1.30988	1.14053	1.14509	1.92506	1.78291	1.63309	2.4755	2.27365	2.29693	3.01331	2.9883	2.9064	3.1076	3.10423	3.13899
1.36667	1.03751	0.941179	0.953415	1.31117	1.14437	1.14472	1.92447	1.77714	1.63722	2.47612	2.27436	2.29202	3.01511	2.99506	2.91032	3.1112	3.1066	3.1393
1.37	1.03734	0.944846	0.949579	1.31217	1.14912	1.14718	1.93233	1.78281	1.63964	2.47968	2.27422	2.29731	3.01691	2.99676	2.91205	3.11105	3.10433	3.14101
1.37333	1.03383	0.944856	0.954584	1.31146	1.14704	1.15313	1.92856	1.78625	1.64143	2.48048	2.27787	2.30284	3.0142	2.99808	2.91577	3.11416	3.10666	3.14162
1.37667	1.04337	0.947974	0.953086	1.30884	1.14735	1.15103	1.93641	1.78494	1.64401	2.47906	2.27706	2.29917	3.02889	2.99661	2.91559	3.11457	3.1134	3.14672
1.38	1.03901	0.95153	0.956433	1.31373	1.15002	1.15043	1.93369	1.79073	1.64281	2.48364	2.28527	2.31082	3.02409	3.00382	2.91628	3.11493	3.11098	3.14873
1.38333	1.04335	0.948534	0.955225	1.31848	1.15432	1.15621	1.94095	1.79392	1.64605	2.47916	2.28645	2.30482	3.02717	3.00083	2.91852	3.12082	3.11276	3.14886
1.38667	1.04768	0.951007	0.957898	1.31838	1.15609	1.15651	1.94131	1.79389	1.64954	2.48789	2.28462	2.31145	3.0292	3.00501	2.91783	3.12547	3.11593	3.15254
1.39	1.0443	0.951335	0.961967	1.31911	1.15036	1.15691	1.94327	1.79642	1.6509	2.49346	2.29324	2.3123	3.03099	3.00334	2.92444	3.11966	3.12301	3.15245
1.39333	1.04705	0.951529	0.960764	1.32338	1.15678	1.1582	1.94586	1.79829	1.65181	2.49125	2.29972	2.31434	3.02745	3.01306	2.92759	3.12504	3.11794	3.16212
1.39667	1.04904	0.951597	0.963267	1.32369	1.16147	1.15741	1.94877	1.80245	1.65105	2.49828	2.29549	2.3201	3.03418	3.01362	2.92645	3.13602	3.1227	3.1563
1.4	1.04817	0.953373	0.962592	1.32343	1.15752	1.16441	1.9519	1.80309	1.6563	2.4966	2.29822	2.3214	3.03684	3.01114	2.93007	3.12891	3.12368	3.16345
1.40333	1.04512	0.956349	0.963854	1.32531	1.15977	1.16317	1.94285	1.80557	1.65943	2.49367	2.29546	2.32119	3.03696	3.01721	2.9275	3.13165	3.13366	3.16226
1.40667	1.04921	0.955501	0.967221	1.32492	1.16346	1.16055	1.95049	1.80352	1.66442	2.50155	2.29807	2.32338	3.04117	3.01626	2.93133	3.13868	3.12631	3.16184
1.41	1.0517	0.959401	0.968058	1.32537	1.16901	1.16365	1.94863	1.80969	1.66101	2.5018	2.30635	2.32252	3.03682	3.01882	2.93803	3.14096	3.13271	3.1673
1.41333	1.05223	0.959644	0.968431	1.33032	1.16449	1.16624	1.95392	1.80728	1.66024	2.49962	2.30344	2.32881	3.04422	3.02514	2.93943	3.13568	3.13265	3.16555
1.41667	1.05264	0.960247	0.973478	1.33122	1.17422	1.16647	1.95579	1.81212	1.66437	2.50366	2.30761	2.3324	3.04994	3.02498	2.9376	3.14384	3.13007	3.16958
1.42	1.05233	0.959209	0.964546	1.33627	1.16834	1.16986	1.96152	1.81661	1.67077	2.51219	2.3111	2.33572	3.0477	3.02087	2.9438	3.14388	3.13899	3.16856
1.42333	1.0533	0.96344	0.971259	1.33426	1.16902	1.17005	1.95819	1.81369	1.66559	2.51086	2.30653	2.3314	3.04674	3.02907	2.94357	3.14208	3.14058	3.17582
1.42667	1.05409	0.962485	0.969699	1.33756	1.17431	1.17513	1.95751	1.81601	1.66761	2.50977	2.31479	2.33966	3.05151	3.03063	2.94431	3.14621	3.13782	3.17933
1.43	1.05905	0.962523	0.979497	1.3373	1.18044	1.17149	1.96147	1.81965	1.67698	2.5144	2.32105	2.33623	3.05223	3.03393	2.94859	3.1505	3.141	3.18112
1.43333	1.05962	0.965207	0.978951	1.33548	1.17458	1.1745	1.96259	1.81929	1.66958	2.51484	2.31657	2.34017	3.05166	3.03725	2.95211	3.14526	3.14371	3.1789
1.43667	1.05871	0.965414	0.975367	1.34004	1.17694	1.17939	1.96384	1.82135	1.67238	2.51955	2.32454	2.35011	3.05017	3.03237	2.95348	3.15426	3.15041	3.18181
1.44	1.0617	0.966825	0.973766	1.33987	1.17716	1.17878	1.96631	1.82638	1.67571	2.51498	2.32282	2.34512	3.05773	3.03375	2.95035	3.1566	3.14676	3.18287
1.44333	1.06492	0.972234	0.980623	1.34042	1.17928	1.177	1.96415	1.82136	1.67767	2.52056	2.32772	2.34714	3.05992	3.0402	2.95486	3.15497	3.14937	3.18574
1.44667	1.05988	0.970536	0.980238	1.33973	1.18341	1.18294	1.96973	1.82727	1.68129	2.51673	2.3296	2.35158	3.05812	3.03802	2.95688	3.15637	3.15427	3.18305
1.45	1.06517	0.973835	0.979911	1.3404	1.18068	1.17561	1.9702	1.82825	1.68012	2.52062	2.32742	2.35357	3.05954	3.04266	2.95903	3.1545	3.15279	3.18965
1.45333	1.06595	0.972986	0.981675	1.34452	1.1867	1.18375	1.98037	1.83397	1.68173	2.52375	2.33082	2.3562	3.06034	3.04475	2.95834	3.16189	3.15797	3.18794
1.45667	1.06405	0.97416	0.983819	1.34431	1.18455	1.1903	1.97564	1.83596	1.68622	2.52179	2.32904	2.35423	3.05962	3.04507	2.9629	3.16119	3.15347	3.18991
1.46	1.06481	0.973272	0.985614	1.34686	1.18315	1.18571	1.97735	1.83393	1.68793	2.52477	2.33804	2.35763	3.06834	3.04642	2.96557	3.15698	3.15863	3.19197
1.46333	1.06498	0.974949	0.983702	1.35173	1.18792	1.18941	1.97907	1.84133	1.69183	2.52362	2.33579	2.35535	3.06862	3.05173	2.96639	3.16279	3.16272	3.19634
1.46667	1.06876	0.979871	0.987869	1.34676	1.19273	1.19039	1.97988	1.84093	1.68885	2.52934	2.33726	2.35869	3.06706	3.05107	2.97184	3.16852	3.16568	3.19904
1.47	1.0696	0.976554	0.987791	1.3499	1.18957	1.19074	1.97802	1.83584	1.69857	2.5313	2.33892	2.36074	3.06952	3.04728	2.97045	3.17039	3.16486	3.195
1.47333	1.07154	0.975167	0.991822	1.34702	1.19458	1.19186	1.98445	1.84721	1.69089	2.52594	2.33685	2.36638	3.06784	3.04892	2.96802	3.16576	3.16482	3.19729
1.47667	1.07119	0.985141	0.991641	1.35294	1.19357	1.19571	1.9828	1.84423	1.69555	2.53603	2.34678	2.36387	3.07028	3.06265	2.97245	3.16983	3.16901	3.20548
1.48	1.07136	0.987284	0.991512	1.3524	1.1976	1.19154	1.98279	1.846	1.6998	2.54445	2.3447	2.36634	3.07414	3.06114	2.97722	3.17707	3.16898	3.20534
1.48333	1.07391	0.979346	0.993123	1.35727	1.19732	1.19562	1.98906	1.85171	1.69843	2.54605	2.35093	2.37268	3.07126	3.06094	2.97582	3.17074	3.17412	3.20017
1.48667	1.07026	0.982922	0.990819	1.35547	1.19818	1.1937	1.99289	1.85117	1.69966	2.53953	2.35001	2.37111	3.07743	3.06441	2.97775	3.17592	3.17276	3.20639
1.49	1.07421	0.983244	0.995908	1.35755	1.19727	1.1986	1.983	1.85014	1.70036	2.54159	2.35064	2.37174	3.08131	3.06194	2.98032	3.17373	3.17132	3.21155
1.49333	1.07328	0.98633	0.990445	1.35985	1.20087	1.20316	1.99233	1.84979	1.70531	2.54888	2.35651	2.37436	3.07562	3.06218	2.97979	3.17973	3.17429	3.21325
1.49667	1.07842	0.986993	0.996674	1.35542	1.20439	1.20436	1.98981	1.85361	1.70857	2.54707	2.35155	2.38372	3.08403	3.06325	2.98308	3.17361	3.17616	3.20866
1.5	1.07941	0.987596	0.999056	1.3537	1.20419	1.20446	1.99412	1.85998	1.70505	2.54307	2.35532	2.37959	3.07987	3.06886	2.9882	3.17825	3.17784	3.21275
1.50333	1.07844	0.990683	0.996916	1.35799	1.20568	1.2036	1.99358	1.85969	1.70909	2.55077	2.34931	2.38115	3.08259	3.06591	2.9826	3.17951	3.17902	3.21638
1.50667	1.07876	0.993502	1.00048	1.36478	1.2074	1.2011	1.99595	1.85888	1.71044	2.5515	2.36006	2.38615	3.08539	3.0667	2.98332	3.18206	3.18627	3.21307
1.51	1.074	0.993	1.0086	1.36191	1.21233	1.20522	1.99507	1.85881	1.71179	2.5496	2.36404	2.37998	3.08143	3.07544	2.99149	3.18682	3.18477	3.21978
1.51333	1.08426	0.993954	1.00164	1.36702	1.20557	1.20738	1.99606	1.86395	1.71397	2.55641	2.36122	2.38761	3.08363	3.07021	2.994	3.18367	3.18264	3.21204
1.51667	1.0815	0.994594	1.00112	1.36296	1.21144	1.20422	1.99622	1.86681	1.71392	2.5534	2.36509	2.38571	3.08615	3.06935	2.99223	3.18528	3.18694	3.22174
1.52	1.07882	0.99377	1.00428	1.36332	1.21082	1.20978	1.9992	1.87063	1.71632	2.55674	2.36594	2.39295	3.08964	3.07468	2.99137	3.18812	3.19004	3.2183
1.52333	1.07893	0.996614	1.0017	1.37578	1.20914	1.21178	1.99685	1.86753	1.71528	2.55622	2.36483	2.39346	3.08618	3.07463	2.99426	3.18967	3.1832	3.21713
1.52667	1.08372	0.995945	1.00474	1.3705	1.21494	1.21059	2.00525	1.86877	1.71992	2.55837	2.37287	2.39255	3.09706	3.07759	2.99674	3.18705	3.19134	3.2201
1.53	1.08487	0.999856	1.00569	1.37018	1.21634	1.20974	2.00622	1.87043	1.71863	2.56195	2.36984	2.38869	3.0863	3.08001	2.99747	3.18859	3.19434	3.2245
1.53333	1.08498	0.996239	1.01078	1.36587	1.22183	1.2111	2.00358	1.87483	1.7172	2.56356	2.37496	2.39665	3.09381	3.07398	2.99939	3.19344	3.19316	3.22438
1.53667	1.08824	0.99814	1.00676	1.37388	1.21567	1.21692	2.00676	1.8669	1.72583	2.56595	2.37324	2.39854	3.09481	3.07712	2.99931	3.19723	3.1945	3.22806
1.54	1.08604	1.0008	1.0102	1.37371	1.21944	1.21284	2.00758	1.87678	1.72691	2.56359	2.37653	2.3985	3.09507	3.08024	3.00043	3.1939	3.19546	3.23225
1.54333	1.0863	1.00103	1.00863	1.37153	1.21896	1.22534	2.01275	1.88112	1.72702	2.5681	2.3767	2.40068	3.09929	3.08838	2.99949	3.19528	3.19479	3.2311
1.54667	1.09025	0.998782	1.01807	1.37077	1.22189	1.21515	2.01131	1.87427	1.72745	2.56292	2.38392	2.3978	3.09826	3.08853	3.00173	3.19921	3.19681	3.23383
1.55	1.08802	1.00565	1.00761	1.37765	1.22498	1.22153	2.01221	1.87744	1.72476	2.56875	2.38134	2.40098	3.09781	3.08995	3.00605	3.19865	3.20342	3.23251
1.55333	1.09208	1.00152	1.01892	1.3829	1.22586	1.22257	2.01171	1.88263	1.73114	2.57119	2.38423	2.4084	3.09725	3.0837	3.00889	3.20062	3.1992	3.23249
1.55667	1.09555	1.00849	1.01089	1.37963	1.22988	1.22483	2.01494	1.88507	1.72825	2.57296	2.38293	2.40834	3.10153	3.08913	3.00979	3.197	3.20365	3.23955
1.56	1.08596	1.00824	1.01446	1.37811	1.22798	1.22404	2.01472	1.88618	1.73185	2.56938	2.38739	2.41127	3.10329	3.08887	3.0086	3.20196	3.2031	3.23323
1.56333	1.09499	1.00654	1.01482	1.37669	1.22494	1.22095	2.01707	1.88087	1.73569	2.56894	2.38494	2.40644	3.10195	3.09191	3.00993	3.19908	3.209	3.23087
1.56667	1.08941	1.00579	1.01377	1.37993	1.23526	1.22754	2.01729	1.88993	1.73922	2.57266	2.38494	2.41255	3.1052	3.09499	3.00741	3.20159	3.20187	3.23562
1.57	1.09663	1.00926	1.01827	1.38363	1.23194	1.22777	2.01819	1.88947	1.73599	2.5772	2.38785	2.4136	3.10131	3.09299	3.01197	3.20114	3.20987	3.23645
1.57333	1.0958	1.01197	1.01721	1.38409	1.23539	1.22852	2.01962	1.88902	1.73683	2.57353	2.39068	2.41031	3.10754	3.09247	3.01354	3.20545	3.20616	3.24122
1.57667	1.09182	1.01545	1.01665	1.38246	1.23249	1.22539	2.0225	1.89299	1.74056	2.57847	2.38909	2.41554	3.10753	3.09563	3.01325	3.21394	3.21105	3.24535
1.58	1.09252	1.01043	1.01877	1.38248	1.23739	1.22614	2.02034	1.89027	1.74457	2.58555	2.396	2.42169	3.10922	3.10143	3.01413	3.20714	3.20982	3.24722
1.58333	1.10126	1.01596	1.02513	1.38643	1.23808	1.23174	2.02702	1.89487	1.73784	2.57596	2.39243	2.4208	3.10663	3.10449	3.01095	3.21171	3.21183	3.24969
1.58667	1.10323	1.01124	1.02735	1.38595	1.2419	1.2316	2.02568	1.89745	1.74345	2.5798	2.39757	2.41999	3.11248	3.09724	3.01868	3.20912	3.21312	3.24352
1.59	1.09891	1.01672	1.02753	1.38457	1.23932	1.2361	2.02257	1.89394	1.74734	2.58141	2.39617	2.42186	3.11396	3.09965	3.02088	3.21072	3.21255	3.24893
1.59333	1.09957	1.01711	1.02685	1.38766	1.24199	1.23147	2.02355	1.90012	1.74895	2.58751	2.39531	2.42343	3.11079	3.09639	3.01953	3.21423	3.21127	3.24727
1.59667	1.09952	1.01678	1.02429	1.38689	1.23917	1.23622	2.02723	1.90333	1.74824	2.58697	2.40552	2.42378	3.1155	3.09856	3.02028	3.21522	3.21403	3.24859
1.6	1.09318	1.01693	1.02848	1.38876	1.23961	1.23209	2.03158	1.89822	1.75385	2.58486	2.40313	2.4293	3.1141	3.10552	3.02053	3.2153	3.21714	3.24814
1.60333	1.10201	1.02362	1.02495	1.3946	1.24326	1.23771	2.02877	1.9029	1.75103	2.58851	2.39818	2.42506	3.11322	3.10017	3.02496	3.2143	3.21509	3.25077
1.60667	1.10637	1.02457	1.03053	1.39525	1.2447	1.24017	2.03194	1.89932	1.7499	2.58594	2.40826	2.42755	3.11335	3.10441	3.02661	3.21763	3.22236	3.25291
1.61	1.11045	1.02517	1.02978	1.39141	1.24736	1.24221	2.02971	1.90622	1.7528	2.59044	2.40808	2.43154	3.11758	3.1009	3.02994	3.21052	3.21986	3.2549
1.61333	1.10113	1.01793	1.03337	1.39285	1.24673	1.2356	2.03017	1.90797	1.75426	2.59211	2.40437	2.42588	3.11637	3.10724	3.02939	3.21375	3.21395	3.25614
1.61667	1.10584	1.02054	1.0337	1.39091	1.24664	1.24391	2.03214	1.90967	1.75388	2.59095	2.41348	2.43242	3.11849	3.10559	3.03054	3.21723	3.22611	3.25331
1.62	1.1041	1.02435	1.0312	1.39092	1.2497	1.23987	2.03361	1.91117	1.75717	2.59407	2.41166	2.43304	3.11566	3.10453	3.02664	3.21896	3.22556	3.25522
1.62333	1.10547	1.02237	1.03762	1.39415	1.25281	1.24508	2.03477	1.90763	1.75725	2.59794	2.41371	2.43084	3.12336	3.10979	3.03435	3.22329	3.22523	3.25688
1.62667	1.10452	1.02886	1.03271	1.39679	1.25116	1.24097	2.03532	1.90816	1.76022	2.59339	2.41533	2.44213	3.124	3.11491	3.03557	3.22627	3.23	3.25615
1.63	1.10803	1.02856	1.03552	1.39836	1.25362	1.24276	2.0399	1.90911	1.7583	2.59667	2.41784	2.434	3.11558	3.10897	3.03319	3.22346	3.22264	3.25975
1.63333	1.10742	1.02654	1.03575	1.39231	1.25553	1.2427	2.03701	1.91039	1.7591	2.59634	2.40871	2.43932	3.12432	3.10953	3.0306	3.22091	3.2267	3.26016
1.63667	1.1097	1.02773	1.03449	1.39805	1.25583	1.24899	2.03652	1.91107	1.76487	2.60347	2.41023	2.43986	3.12031	3.11023	3.03666	3.22632	3.2306	3.26514
1.64	1.1099	1.02782	1.03831	1.39857	1.25927	1.25022	2.03874	1.91642	1.76755	2.60553	2.42061	2.44114	3.11922	3.11113	3.03973	3.22566	3.23312	3.25974
1.64333	1.11082	1.02717	1.03894	1.39744	1.26243	1.24888	2.04279	1.91387	1.76941	2.60436	2.42151	2.44393	3.12197	3.1169	3.03905	3.22237	3.23138	3.26754
1.64667	1.11538	1.03568	1.04263	1.40505	1.25615	1.24917	2.04457	1.91918	1.76511	2.60203	2.42393	2.44572	3.12299	3.1183	3.03825	3.23409	3.23255	3.26396
1.65	1.11268	1.03012	1.03774	1.4104	1.25971	1.24865	2.04052	1.9209	1.76683	2.60007	2.4212	2.44319	3.12965	3.11345	3.03976	3.22794	3.23462	3.26679
1.65333	1.11258	1.03046	1.04291	1.40126	1.2635	1.2557	2.04406	1.91789	1.76471	2.60278	2.42145	2.45096	3.12978	3.11831	3.03849	3.23043	3.23054	3.26721
1.65667	1.11191	1.03166	1.03678	1.40555	1.25596	1.25344	2.04361	1.92075	1.77098	2.60434	2.42018	2.44485	3.12454	3.12002	3.04314	3.23243	3.23156	3.26867
1.66	1.11362	1.04129	1.04525	1.4048	1.25854	1.25298	2.04523	1.9184	1.76957	2.60617	2.42592	2.44831	3.12866	3.11801	3.04005	3.23315	3.23384	3.26533
1.66333	1.11644	1.0354	1.04649	1.40678	1.26616	1.25777	2.0463	1.92468	1.77453	2.60924	2.42805	2.44854	3.1267	3.12596	3.04336	3.23335	3.23427	3.26777
1.66667	1.11052	1.03832	1.04716	1.4069	1.26514	1.25451	2.0455	1.92452	1.76836	2.61115	2.42828	2.44656	3.12584	3.1251	3.04387	3.23033	3.23535	3.2731
1.67	1.11525	1.03905	1.05072	1.41091	1.26979	1.26354	2.04382	1.92538	1.77403	2.60836	2.42565	2.45215	3.13032	3.12237	3.04264	3.22969	3.23793	3.2676
1.67333	1.11443	1.04067	1.04794	1.40877	1.268	1.25879	2.05309	1.92455	1.77696	2.61158	2.43509	2.45593	3.12993	3.12609	3.04572	3.23327	3.23455	3.27113
1.67667	1.11191	1.03623	1.04431	1.40753	1.26736	1.2586	2.05291	1.93202	1.7794	2.61212	2.43107	2.45333	3.13483	3.11859	3.04811	3.23358	3.23894	3.27355
1.68	1.11886	1.04574	1.05054	1.40822	1.26828	1.26145	2.04968	1.92806	1.78079	2.61593	2.43484	2.45351	3.12814	3.12554	3.04965	3.23995	3.23799	3.26919
1.68333	1.11536	1.04435	1.04928	1.4121	1.27437	1.26055	2.05614	1.93031	1.77743	2.61192	2.43641	2.45964	3.12978	3.12406	3.04895	3.23513	3.23948	3.27047
1.68667	1.11689	1.04199	1.04735	1.4099	1.2741	1.25909	2.05376	1.93762	1.77733	2.61187	2.43517	2.45563	3.13312	3.12513	3.05103	3.24055	3.24112	3.27804
1.69	1.11591	1.04417	1.04973	1.41169	1.26958	1.26197	2.05286	1.93468	1.78256	2.6196	2.43405	2.46452	3.13567	3.12589	3.04294	3.23986	3.24252	3.27713
1.69333	1.12135	1.04065	1.05747	1.41248	1.27472	1.26521	2.05331	1.931	1.781	2.62034	2.44049	2.46285	3.13575	3.13027	3.05228	3.24267	3.24561	3.27545
1.69667	1.12286	1.04301	1.0565	1.4131	1.27114	1.2679	2.06063	1.93837	1.78353	2.61802	2.43839	2.45685	3.13336	3.13265	3.05071	3.24443	3.24155	3.27242
1.7	1.12343	1.0453	1.05459	1.4074	1.27609	1.26938	2.05924	1.93723	1.78463	2.61766	2.43846	2.465	3.1327	3.13305	3.05657	3.23635	3.24504	3.27946
1.70333	1.12277	1.04466	1.05404	1.41558	1.27946	1.26808	2.05646	1.93995	1.78154	2.61436	2.43971	2.46712	3.1368	3.12793	3.04961	3.24232	3.24739	3.2777
1.70667	1.12229	1.05236	1.05751	1.41855	1.28003	1.2681	2.05923	1.9417	1.78379	2.61616	2.44323	2.4641	3.13123	3.13224	3.05034	3.23898	3.24559	3.28182
1.71	1.12587	1.04544	1.05837	1.41988	1.2817	1.26944	2.05922	1.94155	1.78869	2.61965	2.44644	2.46468	3.1419	3.12822	3.05439	3.24375	3.2526	3.27868
1.71333	1.12829	1.04568	1.05464	1.41393	1.28039	1.27041	2.0623	1.94101	1.78625	2.61809	2.44618	2.47309	3.1365	3.1264	3.0532	3.24383	3.25031	3.28074
1.71667	1.12488	1.04578	1.05163	1.41549	1.28697	1.27227	2.05672	1.93682	1.78669	2.62283	2.44603	2.46849	3.13842	3.13217	3.05519	3.24829	3.24537	3.27883
1.72	1.1228	1.05194	1.06143	1.41694	1.27966	1.27494	2.06365	1.94242	1.79152	2.62388	2.44833	2.47139	3.14331	3.13278	3.05643	3.24486	3.25135	3.28335
1.72333	1.13114	1.05168	1.06034	1.42108	1.28294	1.27169	2.06259	1.94625	1.79151	2.62168	2.44926	2.47586	3.13924	3.13272	3.05622	3.24167	3.24922	3.28376
1.72667	1.12473	1.05292	1.06214	1.41886	1.28367	1.27255	2.06243	1.9477	1.78991	2.63142	2.45375	2.47161	3.14123	3.13623	3.0566	3.24336	3.2487	3.28333
1.73	1.13313	1.05211	1.05868	1.42035	1.28546	1.27499	2.06162	1.95039	1.79188	2.62406	2.45199	2.47277	3.14459	3.13531	3.05997	3.24929	3.24461	3.2798
1.73333	1.12762	1.05646	1.06118	1.41932	1.28585	1.27839	2.06799	1.94181	1.79478	2.62382	2.45211	2.47426	3.14329	3.13447	3.05793	3.24935	3.25581	3.28837
1.73667	1.12977	1.05726	1.06168	1.42291	1.28974	1.28023	2.05898	1.94455	1.7974	2.62911	2.45471	2.47243	3.13578	3.13807	3.05874	3.25036	3.25012	3.28466
1.74	1.12886	1.05412	1.06549	1.4223	1.28859	1.27613	2.06491	1.94643	1.79747	2.62921	2.44997	2.47562	3.13757	3.13699	3.06173	3.2497	3.25152	3.28732
1.74333	1.13221	1.05079	1.06326	1.42579	1.29268	1.27766	2.06992	1.94768	1.80018	2.62625	2.45667	2.4791	3.14582	3.13605	3.062	3.25243	3.2541	3.2844
1.74667	1.12912	1.05933	1.0608	1.42043	1.28993	1.27955	2.06819	1.94682	1.79786	2.63489	2.45423	2.47632	3.14503	3.13744	3.05922	3.25217	3.25449	3.28952
1.75	1.13153	1.06103	1.06474	1.4204	1.29207	1.27842	2.07095	1.95376	1.79982	2.63302	2.45506	2.47491	3.1446	3.14074	3.06576	3.2508	3.25744	3.28723
1.75333	1.13163	1.05906	1.06746	1.42402	1.29142	1.28017	2.07009	1.95416	1.79739	2.63655	2.45853	2.47594	3.1445	3.14666	3.06397	3.25055	3.25304	3.28826
1.75667	1.13397	1.06043	1.06569	1.42477	1.296	1.28332	2.07172	1.95065	1.79661	2.63625	2.45581	2.48268	3.143	3.14453	3.05905	3.25101	3.25486	3.2858
1.76	1.13404	1.05985	1.06521	1.42881	1.29059	1.27879	2.07491	1.95596	1.80379	2.62892	2.45446	2.48381	3.14239	3.14345	3.07044	3.2509	3.25867	3.28778
1.76333	1.13284	1.06051	1.06568	1.42741	1.29714	1.28612	2.06643	1.95553	1.80474	2.63052	2.45571	2.48015	3.14137	3.14412	3.06617	3.25332	3.25869	3.29218
1.76667	1.13554	1.05259	1.06655	1.42995	1.29339	1.28193	2.07379	1.95839	1.80415	2.6309	2.46267	2.48205	3.15063	3.14041	3.06246	3.25161	3.25308	3.28984
1.77	1.13225	1.06201	1.06952	1.42693	1.29676	1.28532	2.07055	1.9583	1.80002	2.63565	2.46585	2.48214	3.14321	3.14215	3.06649	3.25095	3.25956	3.29324
1.77333	1.13401	1.06212	1.07007	1.42359	1.29863	1.28401	2.07542	1.96081	1.80619	2.63796	2.4619	2.48632	3.14922	3.14167	3.06407	3.25259	3.25856	3.29243
1.77667	1.13448	1.06329	1.07071	1.42644	1.29914	1.28558	2.08113	1.95904	1.80542	2.63912	2.46537	2.48633	3.14718	3.13841	3.07368	3.25699	3.26127	3.29283
1.78	1.13617	1.0611	1.07143	1.42977	1.30133	1.28381	2.07798	1.95697	1.80934	2.6406	2.47288	2.48367	3.14357	3.14404	3.07011	3.2581	3.26361	3.29203
1.78333	1.13399	1.06554	1.0753	1.43172	1.29872	1.28624	2.07805	1.95797	1.80541	2.63636	2.46445	2.48823	3.1452	3.14912	3.07307	3.25587	3.25601	3.29293
1.78667	1.13727	1.0679	1.07532	1.43014	1.29794	1.29103	2.07651	1.96053	1.80936	2.64139	2.46536	2.48867	3.14965	3.14699	3.07069	3.25569	3.26446	3.29069
1.79	1.1417	1.06607	1.0777	1.43413	1.30336	1.29009	2.07639	1.96424	1.81114	2.6408	2.47266	2.49129	3.15137	3.14646	3.07022	3.25743	3.26451	3.29397
1.79333	1.13695	1.06714	1.07568	1.42845	1.3001	1.29569	2.07774	1.96216	1.81112	2.64615	2.4687	2.49004	3.1485	3.14656	3.07609	3.25539	3.26299	3.2948
1.79667	1.1393	1.06526	1.07564	1.43729	1.30393	1.29458	2.08091	1.96389	1.80974	2.64149	2.47172	2.49734	3.15445	3.14915	3.0724	3.257	3.26369	3.29198
1.8	1.13796	1.06731	1.07416	1.43728	1.30302	1.29461	2.07875	1.96567	1.81185	2.64357	2.47121	2.4964	3.14996	3.1484	3.0701	3.25768	3.26334	3.29078
1.80333	1.14073	1.06827	1.08061	1.42981	1.3092	1.29225	2.08422	1.96694	1.81852	2.64289	2.47169	2.49362	3.15186	3.14514	3.07208	3.25953	3.26428	3.29888
1.80667	1.14206	1.06975	1.07389	1.43481	1.30854	1.29423	2.08168	1.96709	1.81266	2.64896	2.47439	2.49458	3.15127	3.14536	3.07612	3.25838	3.2669	3.29923
1.81	1.14147	1.07277	1.07797	1.43057	1.30885	1.29501	2.07961	1.97215	1.81579	2.64512	2.47107	2.4936	3.1541	3.15266	3.07002	3.25939	3.26233	3.29544
1.81333	1.14559	1.07176	1.08003	1.43944	1.30739	1.29211	2.08066	1.96909	1.81724	2.6514	2.47209	2.4969	3.15731	3.15284	3.07832	3.259	3.26661	3.29669
1.81667	1.14225	1.07281	1.07976	1.43578	1.30859	1.29752	2.08656	1.96916	1.81791	2.6454	2.47476	2.49899	3.15832	3.14399	3.07662	3.2584	3.26634	3.29746
1.82	1.14373	1.07201	1.08546	1.43609	1.30929	1.2947	2.08619	1.97543	1.81981	2.64949	2.47579	2.49278	3.15134	3.14841	3.07661	3.26242	3.26466	3.29806
1.82333	1.14063	1.07335	1.07955	1.43631	1.31424	1.29774	2.08635	1.97236	1.81694	2.64678	2.47792	2.50021	3.14948	3.15413	3.079	3.26074	3.26584	3.30083
1.82667	1.14589	1.07619	1.0767	1.44103	1.30843	1.2976	2.08143	1.97155	1.82453	2.64382	2.47441	2.49871	3.15346	3.1525	3.07837	3.26457	3.26515	3.2975
1.83	1.14272	1.07248	1.08117	1.43893	1.31549	1.29875	2.08706	1.97359	1.82567	2.65342	2.48315	2.50014	3.15332	3.15063	3.07368	3.2606	3.26588	3.29749
1.83333	1.14086	1.08095	1.08501	1.43998	1.31726	1.29754	2.08692	1.97607	1.82191	2.65102	2.48187	2.50189	3.14951	3.15475	3.07712	3.2642	3.27424	3.3025
1.83667	1.14427	1.07657	1.08657	1.43834	1.31615	1.30262	2.08903	1.97438	1.82117	2.65372	2.48036	2.50557	3.15811	3.15601	3.07895	3.26741	3.26778	3.29752
1.84	1.14414	1.0761	1.0867	1.44052	1.31533	1.29659	2.09262	1.97488	1.81567	2.64673	2.47709	2.50529	3.15664	3.15013	3.07658	3.26097	3.27216	3.29596
1.84333	1.14495	1.07714	1.08904	1.44043	1.32043	1.3052	2.08707	1.9768	1.8234	2.6505	2.47522	2.50273	3.15388	3.15117	3.07708	3.26336	3.27608	3.30157
1.84667	1.14424	1.07787	1.09014	1.43776	1.32586	1.30007	2.08699	1.98259	1.82701	2.64792	2.48317	2.50413	3.14924	3.15818	3.07715	3.26846	3.26915	3.3048
1.85	1.14706	1.08229	1.08557	1.43996	1.32169	1.29836	2.09201	1.97982	1.82962	2.65686	2.48878	2.50293	3.15473	3.15057	3.07591	3.26457	3.27338	3.30405
1.85333	1.14588	1.08028	1.09035	1.4363	1.31963	1.30215	2.08921	1.97687	1.82576	2.65309	2.48628	2.50871	3.15759	3.15443	3.07682	3.26463	3.27462	3.30252
1.85667	1.15165	1.08279	1.08437	1.43986	1.31545	1.30487	2.09095	1.98252	1.82387	2.65249	2.48177	2.50794	3.15795	3.15422	3.08324	3.26064	3.27687	3.30554
1.86	1.15041	1.08555	1.09139	1.44447	1.32227	1.30703	2.0928	1.98025	1.82488	2.65527	2.48617	2.50217	3.15819	3.15578	3.08615	3.26592	3.26935	3.30046
1.86333	1.15183	1.08254	1.09244	1.44164	1.32158	1.30197	2.09616	1.98582	1.82687	2.65665	2.48578	2.50807	3.15894	3.15265	3.08394	3.27124	3.27442	3.30769
1.86667	1.14813	1.08631	1.09103	1.44402	1.32614	1.30556	2.09692	1.98378	1.83013	2.65572	2.48702	2.51513	3.1552	3.15573	3.08462	3.27133	3.27029	3.30454
1.87	1.1531	1.08373	1.08744	1.44634	1.32635	1.30294	2.09476	1.98453	1.83421	2.65871	2.49002	2.50624	3.15846	3.15781	3.08135	3.2636	3.27351	3.30924
1.87333	1.15118	1.08791	1.08865	1.44821	1.32701	1.30827	2.09959	1.98568	1.83368	2.65971	2.48964	2.51406	3.16079	3.15531	3.08368	3.26895	3.27766	3.30813
1.87667	1.15536	1.08445	1.09351	1.44591	1.32443	1.31033	2.09231	1.98634	1.83262	2.66351	2.4971	2.51705	3.15562	3.15764	3.08296	3.26683	3.27349	3.30651
1.88	1.15355	1.08463	1.09356	1.44683	1.32623	1.30847	2.09569	1.98623	1.83243	2.66379	2.48897	2.51639	3.16378	3.14895	3.08303	3.27347	3.27595	3.30643
1.88333	1.15005	1.08623	1.09659	1.44662	1.32456	1.30488	2.10046	1.98823	1.83289	2.65735	2.48908	2.51345	3.1558	3.15428	3.08288	3.26765	3.27479	3.30712
1.88667	1.15522	1.08718	1.09449	1.44093	1.32838	1.31297	2.09398	1.99142	1.83689	2.66193	2.49218	2.51045	3.15719	3.15676	3.08779	3.26931	3.277	3.30563
1.89	1.15646	1.08646	1.09333	1.45026	1.33172	1.30873	2.09795	1.98531	1.83175	2.65855	2.49572	2.5164	3.15824	3.16095	3.08402	3.27213	3.27377	3.30767
1.89333	1.15806	1.08334	1.09734	1.4434	1.32827	1.30671	2.09574	1.99222	1.83647	2.66632	2.49119	2.51644	3.16038	3.15643	3.085	3.27222	3.27513	3.30945
1.89667	1.14981	1.09241	1.09698	1.45119	1.33077	1.31631	2.09952	1.98942	1.83213	2.66602	2.49664	2.51892	3.15665	3.15839	3.08482	3.27174	3.27661	3.3088
1.9	1.15369	1.08663	1.09413	1.44723	1.33115	1.31528	2.09668	1.98878	1.83584	2.66345	2.49255	2.51729	3.16116	3.15997	3.08392	3.27114	3.27759	3.31009
1.90333	1.16104	1.09076	1.09423	1.44897	1.33559	1.31262	2.10152	1.99242	1.83685	2.66576	2.49473	2.52003	3.16148	3.15696	3.08615	3.26829	3.27815	3.30538
1.90667	1.15712	1.09095	1.10329	1.44989	1.33003	1.31444	2.09686	1.98918	1.83318	2.66169	2.49822	2.52178	3.1614	3.163	3.08725	3.26686	3.28159	3.30821
1.91	1.14947	1.09207	1.10524	1.4514	1.33744	1.31696	2.09617	1.989	1.83769	2.66134	2.49829	2.5172	3.16317	3.15987	3.09086	3.26836	3.27757	3.30681
1.91333	1.16123	1.08776	1.09858	1.44743	1.33107	1.31688	2.10183	1.99419	1.84032	2.6615	2.49817	2.52387	3.16512	3.15958	3.08593	3.27729	3.27908	3.31079
1.91667	1.15769	1.09541	1.09841	1.44976	1.33694	1.32015	2.10363	1.99265	1.8438	2.66599	2.49762	2.51633	3.1556	3.16069	3.08458	3.27264	3.27907	3.30883
1.92	1.1603	1.09475	1.10018	1.45547	1.33856	1.32022	2.10141	1.99504	1.84173	2.6672	2.49242	2.52153	3.16528	3.15904	3.08807	3.26957	3.27834	3.31061
1.92333	1.156	1.09648	1.10236	1.4543	1.34183	1.31503	2.10078	1.99395	1.84469	2.6681	2.49658	2.5176	3.16264	3.16279	3.08799	3.27301	3.28103	3.30936
1.92667	1.1587	1.09549	1.10864	1.45491	1.33799	1.31933	2.10117	1.99479	1.84214	2.66835	2.50445	2.52501	3.16217	3.16273	3.08983	3.27416	3.27777	3.31073
1.93	1.15901	1.09612	1.10224	1.45501	1.33418	1.31848	2.09913	1.99925	1.83885	2.67281	2.50039	2.52349	3.16394	3.16452	3.09067	3.27853	3.28277	3.31641
1.93333	1.15565	1.09468	1.10003	1.45707	1.33802	1.32158	2.10211	1.99797	1.84246	2.67595	2.50386	2.52216	3.16379	3.16092	3.09368	3.26934	3.2833	3.31015
1.93667	1.16172	1.10135	1.10227	1.45232	1.3378	1.32368	2.10507	2.00356	1.84526	2.66774	2.50205	2.52792	3.15973	3.1654	3.093	3.27474	3.28213	3.31638
1.94	1.15973	1.09855	1.10566	1.45572	1.33826	1.32295	2.10379	2.00199	1.84481	2.66886	2.50069	2.52592	3.16519	3.16157	3.09315	3.27264	3.28489	3.30717
1.94333	1.15982	1.09887	1.10498	1.45568	1.33973	1.32266	2.10619	2.00153	1.84601	2.66825	2.50252	2.52347	3.16303	3.15714	3.08582	3.27221	3.2816	3.31258
1.94667	1.16207	1.09779	1.11324	1.45248	1.34219	1.32426	2.10731	2.00183	1.8505	2.67663	2.50403	2.5266	3.16516	3.16339	3.0896	3.27526	3.28197	3.31066
1.95	1.16138	1.09688	1.10943	1.45711	1.34449	1.32687	2.10319	2.00318	1.84825	2.67093	2.50287	2.52714	3.16769	3.16269	3.08939	3.27329	3.2814	3.31116
1.95333	1.16399	1.10319	1.10554	1.45718	1.34578	1.32459	2.10544	1.99946	1.84812	2.67439	2.49694	2.5281	3.1602	3.16317	3.09411	3.27685	3.27664	3.31223
1.95667	1.16269	1.09905	1.1046	1.45947	1.34616	1.32408	2.10897	2.00747	1.84748	2.66871	2.50695	2.52844	3.16339	3.15992	3.09155	3.27669	3.28834	3.31412
1.96	1.16207	1.09726	1.10875	1.4549	1.35206	1.33356	2.11023	2.0087	1.85226	2.67019	2.50413	2.52508	3.1633	3.16662	3.08981	3.27811	3.28373	3.31291
1.96333	1.16802	1.10283	1.11364	1.45872	1.34647	1.32429	2.10805	2.00432	1.84713	2.6786	2.50749	2.52782	3.16187	3.16101	3.09685	3.27873	3.28048	3.31898
1.96667	1.16049	1.1051	1.10928	1.46154	1.35159	1.32107	2.11274	2.00495	1.85062	2.67542	2.50394	2.53346	3.1642	3.16224	3.09215	3.27642	3.27912	3.31268
1.97	1.16522	1.09788	1.10986	1.45917	1.34966	1.32926	2.10656	2.0079	1.84977	2.67805	2.51054	2.52818	3.16732	3.16681	3.09251	3.27414	3.28089	3.31544
1.97333	1.16217	1.10479	1.1094	1.46186	1.34641	1.32723	2.113	2.00547	1.84989	2.67589	2.50567	2.52672	3.16459	3.16306	3.09858	3.27733	3.28711	3.31714
1.97667	1.16687	1.10638	1.11761	1.45941	1.34665	1.32783	2.11602	2.00832	1.85028	2.67747	2.50689	2.53045	3.16601	3.16677	3.09798	3.27664	3.2841	3.31833
1.98	1.1634	1.10541	1.11155	1.46253	1.34467	1.33037	2.11	2.00298	1.85291	2.67969	2.51234	2.53504	3.16673	3.16616	3.0918	3.27891	3.27826	3.31078
1.98333	1.16764	1.10734	1.11594	1.46195	1.35195	1.32979	2.11256	2.01081	1.84726	2.68322	2.51108	2.53304	3.16535	3.16513	3.09585	3.28107	3.28355	3.31496
1.98667	1.16641	1.10722	1.11606	1.45917	1.3546	1.33111	2.10732	2.0053	1.85392	2.67998	2.51251	2.53584	3.16828	3.16036	3.09758	3.27613	3.28534	3.31757
1.99	1.16555	1.10753	1.11862	1.46147	1.35241	1.33194	2.11512	2.00978	1.85282	2.6794	2.51498	2.529	3.16583	3.16742	3.09818	3.2793	3.28791	3.31478
1.99333	1.16392	1.10674	1.11401	1.4627	1.35399	1.33087	2.11073	2.0101	1.85563	2.67806	2.51495	2.52826	3.16988	3.17267	3.10002	3.28296	3.28737	3.31929
1.99667	1.17033	1.10414	1.11687	1.46326	1.35695	1.3331	2.11431	2.01555	1.85258	2.68197	2.51418	2.54381	3.1708	3.16551	3.09615	3.2802	3.28489	3.31819
2	1.16392	1.11197	1.11636	1.46849	1.35882	1.33637	2.11444	2.01309	1.85905	2.67834	2.51285	2.53882	3.16951	3.16564	3.09835	3.27984	3.28501	3.31809
2.00333	1.16653	1.11129	1.1149	1.46062	1.35787	1.33484	2.11396	2.01495	1.85528	2.67438	2.51163	2.54406	3.16829	3.17293	3.1002	3.27769	3.28593	3.31728
2.00667	1.16644	1.11331	1.11611	1.46223	1.3534	1.33542	2.11129	2.00855	1.85882	2.68216	2.51522	2.53381	3.16789	3.17007	3.09778	3.28054	3.2867	3.31124
2.01	1.17228	1.10971	1.12129	1.46755	1.36158	1.33319	2.11643	2.01464	1.85964	2.6789	2.51703	2.53801	3.16187	3.17359	3.09839	3.27813	3.28757	3.31389
2.01333	1.16897	1.11113	1.11677	1.46396	1.36008	1.33156	2.1197	2.02007	1.85996	2.68168	2.51656	2.53736	3.16296	3.16629	3.09976	3.27798	3.28121	3.31776
2.01667	1.17263	1.11193	1.12191	1.45953	1.3657	1.33465	2.11551	2.01246	1.8575	2.68144	2.51768	2.53903	3.17005	3.16902	3.09644	3.28727	3.28832	3.31675
2.02	1.17183	1.11334	1.11719	1.46998	1.35777	1.33644	2.12067	2.01608	1.86138	2.68347	2.51376	2.53981	3.16798	3.17022	3.10057	3.27979	3.28854	3.31253
2.02333	1.17146	1.11601	1.12149	1.46412	1.3625	1.33992	2.11813	2.01658	1.85801	2.68278	2.52219	2.54212	3.16965	3.17046	3.10177	3.28492	3.28874	3.31878
2.02667	1.1747	1.11088	1.1269	1.46899	1.3605	1.34291	2.11285	2.01669	1.86359	2.68404	2.51924	2.53915	3.17329	3.17159	3.09579	3.2806	3.28539	3.31888
2.03	1.17092	1.1094	1.12414	1.46143	1.36266	1.33655	2.11831	2.01515	1.86003	2.68356	2.52278	2.53622	3.16958	3.17069	3.09925	3.28179	3.28928	3.31785
2.03333	1.17555	1.11401	1.12404	1.46554	1.36209	1.34008	2.11372	2.02136	1.8643	2.68247	2.51964	2.54064	3.16797	3.16591	3.09862	3.2812	3.2908	3.316
2.03667	1.17163	1.11452	1.11615	1.46906	1.36631	1.34012	2.11769	2.01487	1.85883	2.68393	2.51909	2.54752	3.16881	3.17332	3.10552	3.28051	3.28692	3.32091
2.04	1.16809	1.11326	1.12468	1.46696	1.36428	1.34082	2.12648	2.01879	1.86327	2.68651	2.51848	2.54278	3.17047	3.16976	3.10149	3.2802	3.2866	3.31638
2.04333	1.17105	1.11316	1.12498	1.46703	1.36439	1.3387	2.12092	2.02157	1.86407	2.68709	2.52143	2.54549	3.16997	3.17772	3.09921	3.28006	3.29156	3.315
2.04667	1.17402	1.11398	1.12236	1.46584	1.36896	1.34017	2.12128	2.02027	1.86316	2.68767	2.52275	2.54765	3.17218	3.16622	3.09914	3.28002	3.28798	3.32217
2.05	1.17002	1.11227	1.12722	1.46771	1.36547	1.342	2.12211	2.0219	1.86459	2.68318	2.51993	2.54427	3.16968	3.1723	3.10031	3.28634	3.28626	3.31758
2.05333	1.1729	1.11771	1.12361	1.46738	1.3662	1.33798	2.12293	2.0261	1.86514	2.68795	2.52113	2.54275	3.1692	3.16564	3.10127	3.28343	3.28869	3.31959
2.05667	1.174	1.12209	1.1259	1.46812	1.37312	1.33712	2.1219	2.02034	1.86456	2.68791	2.52386	2.54896	3.16718	3.16674	3.1064	3.28555	3.28754	3.31838
2.06	1.17556	1.11199	1.1259	1.46934	1.37062	1.34924	2.12573	2.02345	1.86664	2.69432	2.52524	2.54608	3.1692	3.17114	3.10466	3.28264	3.29198	3.3186
2.06333	1.17658	1.11966	1.12752	1.4701	1.36779	1.33975	2.12194	2.02635	1.86994	2.69243	2.53148	2.54464	3.16985	3.16615	3.10374	3.2849	3.29003	3.32041
2.06667	1.1783	1.1154	1.12427	1.46885	1.36591	1.34894	2.12377	2.02473	1.87009	2.68973	2.52671	2.5451	3.17243	3.17451	3.10071	3.28276	3.29168	3.32248
2.07	1.17267	1.12064	1.12662	1.47257	1.37121	1.33815	2.12244	2.02665	1.87353	2.68503	2.5182	2.54615	3.16355	3.17207	3.10275	3.28825	3.28954	3.32721
2.07333	1.17691	1.11846	1.1316	1.47228	1.37553	1.34592	2.12202	2.02792	1.8739	2.68548	2.52205	2.5446	3.1747	3.17343	3.1015	3.28795	3.29051	3.32637
2.07667	1.17497	1.12463	1.13322	1.47565	1.37145	1.3444	2.12383	2.02889	1.87354	2.68611	2.52868	2.54225	3.16741	3.16982	3.09996	3.28519	3.28899	3.32568
2.08	1.17485	1.11806	1.1302	1.47397	1.37221	1.34911	2.12425	2.02541	1.86573	2.68979	2.52359	2.54622	3.17194	3.17287	3.10337	3.28553	3.29502	3.32088
2.08333	1.1783	1.12073	1.13013	1.47267	1.36589	1.34623	2.12699	2.02252	1.86768	2.69127	2.52519	2.5509	3.16679	3.17065	3.10025	3.28273	3.2896	3.32175
2.08667	1.17719	1.12408	1.13208	1.4705	1.37593	1.34561	2.12627	2.03086	1.86647	2.6959	2.5284	2.55331	3.17172	3.1712	3.10537	3.28261	3.29885	3.32538
2.09	1.17609	1.12385	1.13018	1.47371	1.37388	1.34643	2.1295	2.02892	1.8684	2.69399	2.52955	2.55339	3.1698	3.17098	3.10383	3.28214	3.29026	3.3226
2.09333	1.18145	1.12417	1.1327	1.47715	1.37806	1.34635	2.12684	2.03094	1.86726	2.69368	2.53024	2.55469	3.17181	3.17293	3.10097	3.282	3.29411	3.32192
2.09667	1.17734	1.1248	1.13856	1.47125	1.37438	1.35033	2.12136	2.03053	1.87367	2.69271	2.5291	2.54719	3.16985	3.17108	3.10611	3.2832	3.29206	3.32188
2.1	1.18191	1.12625	1.13423	1.47252	1.37465	1.34991	2.12487	2.02858	1.87161	2.69605	2.53321	2.55096	3.16993	3.17231	3.10003	3.28542	3.28945	3.32213
2.10333	1.17756	1.13076	1.13887	1.47218	1.37545	1.3498	2.12425	2.03176	1.8745	2.69201	2.53068	2.55039	3.17064	3.17305	3.10453	3.28337	3.2923	3.32015
2.10667	1.1789	1.12641	1.13762	1.47531	1.37234	1.35268	2.12431	2.03292	1.87381	2.69351	2.53592	2.55108	3.16594	3.17057	3.10592	3.28479	3.28758	3.324
2.11	1.1841	1.13	1.13615	1.4758	1.37769	1.35168	2.12221	2.02888	1.87379	2.68798	2.53491	2.55287	3.16874	3.17328	3.10915	3.28413	3.29293	3.32334
2.11333	1.18385	1.13215	1.13831	1.47839	1.37972	1.35587	2.12872	2.0313	1.87552	2.69019	2.53408	2.55605	3.1698	3.1729	3.10601	3.28999	3.29297	3.32151
2.11667	1.18073	1.12911	1.13682	1.47524	1.37901	1.35467	2.13076	2.03011	1.87702	2.69808	2.53329	2.55042	3.17092	3.17654	3.10331	3.28489	3.29604	3.32306
2.12	1.1835	1.13037	1.13615	1.4803	1.38048	1.35731	2.12796	2.03226	1.87617	2.6922	2.52884	2.55066	3.16817	3.16937	3.10283	3.28581	3.29201	3.32112
2.12333	1.18198	1.13048	1.13981	1.48097	1.38313	1.35446	2.133	2.03097	1.87766	2.69615	2.53851	2.55757	3.17056	3.17272	3.1032	3.28447	3.29375	3.32353
2.12667	1.18851	1.12863	1.13255	1.47235	1.38213	1.35183	2.12418	2.03466	1.87433	2.69728	2.52818	2.55309	3.16805	3.17085	3.10937	3.28394	3.2925	3.32747
2.13	1.18251	1.13189	1.13868	1.47531	1.38408	1.35501	2.12582	2.03153	1.87866	2.69831	2.53391	2.54781	3.17131	3.17476	3.10847	3.28574	3.29584	3.3251
2.13333	1.18293	1.13416	1.13334	1.47641	1.37398	1.35219	2.1301	2.03602	1.8755	2.69707	2.53935	2.5538	3.16595	3.17469	3.10461	3.28369	3.29074	3.32142
2.13667	1.18748	1.13002	1.14443	1.47566	1.383	1.3589	2.1309	2.03576	1.8771	2.69341	2.53405	2.55757	3.16836	3.17429	3.105	3.28258	3.29457	3.32688
2.14	1.18167	1.13101	1.14151	1.47687	1.38527	1.35309	2.12806	2.03774	1.87961	2.69978	2.53564	2.55714	3.16977	3.1766	3.10358	3.2858	3.28842	3.32213
2.14333	1.18453	1.13239	1.14544	1.47585	1.38132	1.35681	2.12751	2.03805	1.87522	2.69783	2.53449	2.55809	3.16882	3.17337	3.10305	3.28815	3.29172	3.32092
2.14667	1.18485	1.13335	1.14113	1.47821	1.38426	1.35741	2.13245	2.03868	1.87703	2.69464	2.54064	2.55858	3.17281	3.17952	3.10402	3.28541	3.29483	3.32819
2.15	1.18545	1.1357	1.14361	1.47982	1.38591	1.35516	2.13308	2.03617	1.88223	2.69962	2.53363	2.56128	3.17626	3.17484	3.10163	3.28498	3.29303	3.32665
2.15333	1.18516	1.13824	1.14204	1.48027	1.38197	1.35611	2.13702	2.03685	1.88337	2.70089	2.53045	2.56031	3.17031	3.17127	3.10552	3.2878	3.29892	3.32596
2.15667	1.18958	1.13589	1.14599	1.47593	1.38839	1.36089	2.13464	2.03509	1.88084	2.69789	2.53902	2.56247	3.16645	3.17265	3.10919	3.289	3.29578	3.31916
2.16	1.185	1.13398	1.14175	1.47595	1.39119	1.35973	2.13041	2.03714	1.87871	2.70117	2.53895	2.55586	3.16746	3.17286	3.10224	3.28781	3.29516	3.32304
2.16333	1.18347	1.13335	1.14643	1.47727	1.38945	1.35937	2.13633	2.03674	1.88527	2.69993	2.5386	2.56685	3.17358	3.16945	3.10784	3.29167	3.29119	3.32469
2.16667	1.19043	1.13993	1.14101	1.48093	1.38834	1.35653	2.13357	2.03891	1.88324	2.6975	2.54	2.55943	3.1735	3.17374	3.10553	3.28909	3.29132	3.31856
2.17	1.19127	1.13397	1.13999	1.47952	1.38892	1.36614	2.13504	2.0406	1.88301	2.70179	2.53971	2.56113	3.17481	3.17182	3.10784	3.29044	3.28833	3.32601
2.17333	1.19137	1.13293	1.14579	1.47923	1.38628	1.35592	2.13287	2.04128	1.88721	2.70607	2.53769	2.55945	3.17358	3.17341	3.10384	3.28622	3.29416	3.32751
2.17667	1.19039	1.1382	1.14817	1.4808	1.39	1.36216	2.13173	2.03825	1.8869	2.70179	2.53695	2.56292	3.17186	3.17363	3.10665	3.288	3.29229	3.32058
2.18	1.18751	1.13952	1.14514	1.48	1.39086	1.36275	2.13226	2.0431	1.88054	2.70049	2.53987	2.5616	3.16849	3.17527	3.10636	3.28606	3.28872	3.32113
2.18333	1.18656	1.1383	1.1464	1.48235	1.39147	1.36283	2.13337	2.03553	1.88503	2.70248	2.54429	2.56151	3.17193	3.17728	3.10487	3.29224	3.29465	3.3273
2.18667	1.18808	1.13906	1.15023	1.48609	1.39288	1.36684	2.13377	2.04234	1.8877	2.69766	2.53666	2.56603	3.16886	3.17122	3.10588	3.28729	3.29459	3.32226
2.19	1.19075	1.1403	1.14781	1.47964	1.39022	1.3639	2.13545	2.03824	1.88533	2.70297	2.54342	2.56609	3.17128	3.17515	3.11244	3.29016	3.29396	3.31849
2.19333	1.19556	1.14215	1.14632	1.48166	1.39412	1.36186	2.1331	2.03851	1.8838	2.69851	2.54206	2.56428	3.17372	3.17468	3.10726	3.29142	3.29859	3.32676
2.19667	1.192	1.13952	1.15219	1.48609	1.39352	1.36326	2.13774	2.04509	1.88679	2.70253	2.54161	2.56322	3.17118	3.17528	3.10799	3.28873	3.29543	3.32698
2.2	1.19331	1.14046	1.15091	1.4774	1.3922	1.36825	2.13642	2.04264	1.88119	2.69954	2.54659	2.55764	3.16661	3.17017	3.10465	3.28836	3.28997	3.323
2.20333	1.18966	1.13889	1.14798	1.48105	1.39354	1.36628	2.1395	2.04262	1.88897	2.70142	2.54463	2.56144	3.17661	3.17558	3.11029	3.28553	3.29224	3.32409
2.20667	1.1865	1.13913	1.14605	1.4818	1.39218	1.3667	2.13566	2.04555	1.88799	2.70251	2.5461	2.56517	3.16235	3.17382	3.10833	3.284	3.29566	3.32928
2.21	1.18889	1.14317	1.14661	1.48204	1.40358	1.36907	2.13715	2.04586	1.88597	2.70309	2.54416	2.5719	3.16964	3.17352	3.104	3.28342	3.29509	3.32704
2.21333	1.19117	1.14351	1.1534	1.47993	1.39809	1.36868	2.13797	2.04326	1.88845	2.70637	2.5479	2.56952	3.17001	3.17478	3.10735	3.28643	3.29535	3.3245
2.21667	1.18942	1.14155	1.1501	1.48198	1.39411	1.35893	2.14171	2.04307	1.88715	2.70286	2.53795	2.56644	3.17169	3.17716	3.11068	3.28051	3.29405	3.32092
2.22	1.19126	1.13982	1.156	1.47916	1.39752	1.36929	2.13969	2.04404	1.88878	2.70583	2.54617	2.56201	3.16948	3.17044	3.10636	3.28802	3.29738	3.32225
2.22333	1.18909	1.14055	1.15415	1.48415	1.4005	1.36384	2.13574	2.04817	1.88965	2.70656	2.54312	2.56566	3.17449	3.17596	3.10982	3.28563	3.29397	3.32747
2.22667	1.19508	1.14231	1.15183	1.48522	1.39716	1.36811	2.13648	2.04787	1.88807	2.70756	2.54786	2.56346	3.17148	3.1733	3.10504	3.28672	3.29618	3.32451
2.23	1.19211	1.14253	1.15595	1.48138	1.39901	1.37327	2.14441	2.04742	1.88668	2.70322	2.54474	2.56019	3.17706	3.17494	3.10683	3.28871	3.29625	3.32377
2.23333	1.19182	1.15006	1.15306	1.48499	1.39638	1.37299	2.14261	2.04847	1.89275	2.70459	2.54321	2.56172	3.16764	3.17868	3.11336	3.29252	3.2904	3.32463
2.23667	1.19455	1.14821	1.15689	1.48815	1.40296	1.37091	2.13799	2.05196	1.89081	2.70627	2.5489	2.56926	3.17166	3.17437	3.10577	3.28607	3.29109	3.32377
2.24	1.20016	1.14991	1.1523	1.48479	1.40196	1.37206	2.14162	2.04643	1.88928	2.71108	2.54415	2.57302	3.16885	3.17257	3.10618	3.28801	3.30049	3.3241
2.24333	1.18959	1.15058	1.15469	1.48823	1.40558	1.37202	2.14263	2.05093	1.88764	2.70419	2.55077	2.56766	3.17144	3.17387	3.10745	3.28845	3.29799	3.32711
2.24667	1.19692	1.151	1.1514	1.48679	1.40481	1.37083	2.14035	2.0493	1.8901	2.7043	2.5418	2.5679	3.17632	3.17495	3.1139	3.29013	3.29588	3.32817
2.25	1.19613	1.14931	1.15159	1.48549	1.40336	1.37311	2.13899	2.05201	1.89545	2.70609	2.54311	2.56955	3.17038	3.16989	3.10924	3.28177	3.29832	3.32367
2.25333	1.19301	1.14364	1.15272	1.48532	1.40136	1.37199	2.14169	2.05183	1.89375	2.70817	2.54959	2.57167	3.17385	3.17586	3.11058	3.28728	3.29782	3.32306
2.25667	1.19625	1.15049	1.15945	1.48428	1.40264	1.37374	2.14518	2.04864	1.89529	2.70745	2.54748	2.56575	3.17422	3.17806	3.10608	3.2867	3.29488	3.32469
2.26	1.19386	1.15202	1.15566	1.48759	1.40286	1.37256	2.13801	2.0526	1.89803	2.70691	2.54768	2.56901	3.17314	3.17291	3.10896	3.28584	3.2968	3.32063
2.26333	1.19682	1.15498	1.15791	1.48674	1.41099	1.37557	2.14273	2.05062	1.89092	2.70889	2.54412	2.57039	3.17445	3.1795	3.11039	3.2856	3.29588	3.32963
2.26667	1.20032	1.1513	1.15748	1.48573	1.40951	1.37845	2.13774	2.04731	1.89523	2.71073	2.55397	2.57195	3.16792	3.17704	3.11025	3.28877	3.29334	3.32204
2.27	1.19482	1.1541	1.1576	1.49122	1.40481	1.3789	2.1484	2.05094	1.89212	2.70871	2.54903	2.57071	3.17444	3.17463	3.10929	3.28725	3.2904	3.32409
2.27333	1.19438	1.15471	1.15987	1.48772	1.40861	1.37357	2.13839	2.05275	1.89034	2.70537	2.55014	2.5745	3.17045	3.17624	3.11525	3.28615	3.29457	3.32627
2.27667	1.19702	1.15666	1.16249	1.48764	1.40745	1.37523	2.14286	2.05277	1.89596	2.69941	2.55084	2.56709	3.16921	3.17428	3.11175	3.28455	3.29207	3.32444
2.28	1.20064	1.15765	1.16127	1.48368	1.41029	1.37387	2.1412	2.05044	1.89672	2.70993	2.5466	2.57346	3.17254	3.1711	3.10677	3.28806	3.29393	3.3343
2.28333	1.19439	1.15575	1.15994	1.49612	1.41139	1.37856	2.14558	2.05755	1.89809	2.71252	2.54865	2.57164	3.16842	3.17569	3.10639	3.28846	3.29535	3.326
2.28667	1.19114	1.15375	1.16479	1.48784	1.41246	1.37675	2.14348	2.05453	1.89835	2.71113	2.55309	2.57338	3.17045	3.17202	3.11399	3.28414	3.29547	3.32366
2.29	1.20257	1.15418	1.16209	1.49204	1.40863	1.37654	2.14193	2.05217	1.90143	2.71447	2.548	2.57855	3.17008	3.16977	3.11247	3.2841	3.29487	3.32652
2.29333	1.19484	1.15869	1.1616	1.48713	1.41049	1.38008	2.14263	2.054	1.8989	2.713	2.54693	2.57103	3.17128	3.17445	3.10892	3.28659	3.29694	3.32377
2.29667	1.20171	1.15514	1.16177	1.48864	1.41134	1.38065	2.14972	2.05302	1.89808	2.71563	2.5508	2.56875	3.17306	3.17508	3.1113	3.29182	3.29429	3.3267
2.3	1.19881	1.15575	1.16266	1.4906	1.41175	1.37515	2.14105	2.05421	1.89806	2.71004	2.55132	2.57818	3.1692	3.17314	3.11771	3.28773	3.29602	3.32401
2.30333	1.20116	1.15333	1.16436	1.49321	1.40796	1.38017	2.13954	2.05343	1.90482	2.70677	2.55861	2.57307	3.17133	3.17811	3.11204	3.29459	3.29667	3.32625
2.30667	1.19435	1.1596	1.16491	1.48683	1.41939	1.38416	2.13969	2.0595	1.90054	2.71458	2.55119	2.57245	3.17106	3.17248	3.10953	3.29039	3.29633	3.32372
2.31	1.19746	1.15446	1.17063	1.48928	1.41452	1.37672	2.14088	2.0538	1.89819	2.70542	2.55604	2.57846	3.17797	3.1768	3.11157	3.28791	3.29285	3.32461
2.31333	1.1974	1.15771	1.16418	1.48795	1.41348	1.38517	2.14525	2.05935	1.90057	2.71162	2.55336	2.57911	3.1698	3.17521	3.11045	3.28629	3.29036	3.32487
2.31667	1.19827	1.15248	1.16831	1.48748	1.41164	1.38048	2.14588	2.06198	1.90344	2.71245	2.54952	2.57112	3.16983	3.17159	3.11077	3.28537	3.30011	3.32629
2.32	1.204	1.15647	1.16503	1.48893	1.41596	1.38447	2.14255	2.0541	1.89736	2.70985	2.55218	2.57423	3.17754	3.17478	3.11376	3.29267	3.29235	3.32723
2.32333	1.19785	1.16088	1.16721	1.49169	1.41027	1.38344	2.14066	2.05543	1.89781	2.71115	2.5516	2.57829	3.17139	3.17252	3.11212	3.2859	3.29003	3.32388
2.32667	1.20379	1.15971	1.17073	1.48934	1.41622	1.38159	2.14688	2.06096	1.90264	2.71423	2.54718	2.57893	3.16954	3.17654	3.11462	3.29045	3.29226	3.3243
2.33	1.2023	1.15908	1.16783	1.49185	1.41403	1.38179	2.14597	2.05878	1.90589	2.71264	2.5537	2.584	3.17213	3.17917	3.11113	3.29171	3.29586	3.32391
2.33333	1.20074	1.16263	1.16081	1.49403	1.41544	1.38545	2.14954	2.06136	1.89826	2.71293	2.55315	2.58003	3.17025	3.17849	3.11095	3.28814	3.29867	3.3298
2.33667	1.19876	1.16375	1.16901	1.49332	1.41685	1.3781	2.14436	2.05824	1.90502	2.71158	2.55705	2.57679	3.17246	3.17351	3.11119	3.29149	3.29415	3.32499
2.34	1.19754	1.15921	1.17346	1.49347	1.41527	1.38975	2.14883	2.05675	1.91034	2.70939	2.55705	2.5747	3.17218	3.17402	3.11107	3.28909	3.29586	3.32661
2.34333	1.20501	1.16071	1.16789	1.49135	1.42003	1.37881	2.14836	2.0608	1.90536	2.71258	2.55384	2.5776	3.17468	3.175	3.11148	3.29076	3.29598	3.32415
2.34667	1.20167	1.15858	1.16945	1.49099	1.4165	1.3889	2.14912	2.06213	1.90331	2.70889	2.56218	2.58006	3.17776	3.18134	3.10946	3.28865	3.29799	3.32291
2.35	1.20508	1.16294	1.16893	1.48939	1.41684	1.38394	2.14779	2.06085	1.90417	2.7127	2.55976	2.58201	3.17333	3.17349	3.10961	3.2891	3.2903	3.32937
2.35333	1.20313	1.15808	1.16809	1.49218	1.42012	1.38581	2.15053	2.06323	1.90555	2.71371	2.56053	2.57962	3.16714	3.17525	3.10731	3.29125	3.28951	3.32743
2.35667	1.20191	1.16313	1.17589	1.49414	1.42076	1.38924	2.14601	2.06189	1.90203	2.71592	2.55533	2.57699	3.17292	3.17285	3.10975	3.28875	3.2901	3.32151
2.36	1.20144	1.1634	1.16902	1.49439	1.42132	1.38343	2.15352	2.06404	1.90552	2.71673	2.55375	2.57601	3.17481	3.17148	3.10874	3.28725	3.28966	3.32616
2.36333	1.20321	1.1663	1.16556	1.49497	1.41972	1.38583	2.1487	2.05945	1.90618	2.7085	2.5543	2.57399	3.17735	3.17432	3.10863	3.28274	3.29749	3.32391
2.36667	1.20212	1.16536	1.17102	1.48948	1.41867	1.38385	2.15295	2.05965	1.90611	2.71768	2.55615	2.58235	3.1696	3.17756	3.10627	3.28519	3.29783	3.32114
2.37	1.20549	1.16082	1.17305	1.49201	1.42302	1.38533	2.14631	2.06668	1.90575	2.71559	2.55566	2.5807	3.17222	3.17194	3.11192	3.29176	3.2987	3.32575
2.37333	1.20848	1.16216	1.17511	1.49065	1.41837	1.38698	2.15095	2.0646	1.90389	2.71531	2.55052	2.58183	3.17027	3.17269	3.11117	3.28882	3.29857	3.32211
2.37667	1.2069	1.16562	1.17179	1.49865	1.42196	1.38305	2.1477	2.06334	1.90631	2.71781	2.55895	2.58345	3.1714	3.17381	3.10928	3.28999	3.29471	3.32702
2.38	1.20751	1.16459	1.17181	1.49502	1.42352	1.38495	2.15066	2.0627	1.90705	2.71063	2.55695	2.58195	3.17614	3.17191	3.1095	3.28782	3.28957	3.32842
2.38333	1.20507	1.16921	1.17684	1.49541	1.42525	1.38576	2.15108	2.06077	1.90769	2.71725	2.55698	2.58384	3.16841	3.17312	3.11255	3.29202	3.29306	3.32678
2.38667	1.20501	1.16842	1.17155	1.49049	1.42743	1.39156	2.14393	2.06502	1.90573	2.71948	2.56489	2.57999	3.17171	3.17585	3.11079	3.29205	3.29563	3.32503
2.39	1.20636	1.16753	1.17489	1.48877	1.42487	1.39003	2.15233	2.06909	1.90725	2.71123	2.55882	2.58126	3.16804	3.175	3.11014	3.29027	3.29311	3.32834
2.39333	1.20623	1.16714	1.17307	1.49183	1.42322	1.38946	2.14847	2.06507	1.90909	2.71612	2.55776	2.58019	3.16635	3.18052	3.1136	3.28864	3.29555	3.31973
2.39667	1.20664	1.17121	1.17302	1.49534	1.42613	1.39326	2.14898	2.06963	1.90981	2.71817	2.55974	2.58193	3.17056	3.17698	3.11105	3.28867	3.29314	3.32746
2.4	1.20143	1.16656	1.17249	1.5011	1.42857	1.39023	2.15121	2.0662	1.90944	2.71489	2.56201	2.58271	3.17164	3.173	3.11374	3.29159	3.29641	3.32431
2.40333	1.20186	1.16703	1.17687	1.49451	1.4239	1.39304	2.14866	2.06495	1.90785	2.71337	2.55563	2.58459	3.1723	3.17021	3.11245	3.28476	3.29234	3.3272
2.40667	1.20664	1.1687	1.17925	1.49441	1.43094	1.39387	2.14821	2.06615	1.91221	2.71671	2.55987	2.58019	3.17086	3.17485	3.11177	3.28536	3.29987	3.32704
2.41	1.20938	1.17387	1.17433	1.49296	1.42561	1.39249	2.15431	2.06375	1.91149	2.71805	2.5575	2.58583	3.16979	3.16995	3.11192	3.28374	3.28817	3.32311
2.41333	1.20729	1.16885	1.17739	1.49431	1.42437	1.3937	2.14937	2.06974	1.91016	2.71299	2.55968	2.58784	3.17036	3.17313	3.11262	3.28717	3.28924	3.33117
2.41667	1.21034	1.17294	1.17619	1.50098	1.42193	1.38995	2.14577	2.06451	1.91246	2.71406	2.55601	2.58236	3.17261	3.17104	3.10883	3.29074	3.29805	3.32342
2.42	1.2107	1.17284	1.17694	1.49294	1.42662	1.39548	2.15183	2.0692	1.90555	2.71987	2.5639	2.58127	3.16994	3.17643	3.11074	3.28874	3.29404	3.32196
2.42333	1.20681	1.17158	1.17992	1.4954	1.42925	1.39624	2.15433	2.06578	1.90964	2.72252	2.55949	2.58219	3.16858	3.1758	3.11086	3.28695	3.29551	3.32983
2.42667	1.21062	1.17061	1.17642	1.49801	1.42884	1.39485	2.15208	2.07029	1.9179	2.72274	2.56424	2.58824	3.16875	3.17937	3.11181	3.28841	3.29593	3.32647
2.43	1.21026	1.17315	1.17814	1.49817	1.43393	1.39444	2.15324	2.07031	1.91258	2.71793	2.56222	2.58376	3.16824	3.16704	3.10915	3.28706	3.29338	3.32545
2.43333	1.20636	1.17113	1.17983	1.49682	1.42616	1.39377	2.14578	2.06986	1.91036	2.71882	2.55806	2.58476	3.175	3.17618	3.11284	3.28632	3.29368	3.32195
2.43667	1.21073	1.17489	1.18673	1.49924	1.43068	1.39888	2.15603	2.06871	1.91313	2.71781	2.56192	2.58178	3.16998	3.17469	3.11069	3.2888	3.29117	3.32293
2.44	1.20714	1.17278	1.17971	1.49192	1.42918	1.39841	2.15019	2.06852	1.9087	2.71831	2.56202	2.58239	3.16957	3.17112	3.1113	3.2855	3.29317	3.32402
2.44333	1.20795	1.17298	1.17982	1.49616	1.43184	1.39292	2.15356	2.06758	1.91165	2.71944	2.56499	2.5851	3.17061	3.17379	3.11041	3.2873	3.29376	3.32105
2.44667	1.21533	1.17528	1.18224	1.49451	1.42847	1.39653	2.15034	2.07141	1.91817	2.71986	2.56086	2.58156	3.16799	3.17557	3.11565	3.28363	3.29228	3.32379
2.45	1.20562	1.1751	1.17849	1.50044	1.43168	1.39568	2.1517	2.07328	1.90707	2.7194	2.56283	2.58476	3.1681	3.17183	3.1096	3.28563	3.29591	3.32278
2.45333	1.21208	1.17336	1.18388	1.49971	1.43389	1.39611	2.15256	2.07515	1.91152	2.72185	2.56491	2.58641	3.17038	3.17579	3.11407	3.2885	3.29249	3.3236
2.45667	1.21079	1.17863	1.18194	1.49707	1.43504	1.4002	2.15043	2.06972	1.91499	2.72028	2.55951	2.5915	3.17108	3.17345	3.11099	3.2915	3.29482	3.32639
2.46	1.20759	1.17786	1.18431	1.49341	1.43462	1.40388	2.15415	2.0691	1.91575	2.71855	2.56962	2.58416	3.16907	3.17278	3.1139	3.28391	3.29115	3.32471
2.46333	1.21334	1.17572	1.1823	1.49473	1.43835	1.39976	2.15605	2.07356	1.91102	2.71965	2.56437	2.58195	3.17509	3.16878	3.11079	3.28968	3.29397	3.32152
2.46667	1.20916	1.17094	1.18204	1.49272	1.43333	1.39775	2.15368	2.06786	1.91759	2.71814	2.56749	2.58462	3.17604	3.17279	3.11326	3.28852	3.28997	3.32607
2.47	1.21068	1.17826	1.18227	1.49964	1.43376	1.40124	2.15747	2.07233	1.91814	2.71876	2.5664	2.58918	3.16855	3.16959	3.1104	3.28537	3.29152	3.32408
2.47333	1.21269	1.17805	1.18887	1.49741	1.43181	1.39709	2.15681	2.07305	1.91793	2.71976	2.56503	2.59046	3.16998	3.17089	3.10902	3.29035	3.29986	3.32589
2.47667	1.21146	1.17477	1.18261	1.49875	1.43846	1.40233	2.1512	2.06782	1.91493	2.72178	2.56388	2.59071	3.17278	3.17456	3.11213	3.28937	3.29944	3.32764
2.48	1.20941	1.17898	1.18453	1.50015	1.43941	1.405	2.15594	2.06888	1.91287	2.72133	2.56854	2.59008	3.1722	3.17245	3.11252	3.28591	3.29274	3.3216
2.48333	1.21027	1.18323	1.18353	1.4964	1.44163	1.39789	2.1564	2.0737	1.91493	2.71879	2.56705	2.58491	3.16829	3.17237	3.10908	3.2914	3.29112	3.3214
2.48667	1.21269	1.18081	1.18851	1.50186	1.44157	1.401	2.15363	2.07775	1.91453	2.72558	2.56792	2.58515	3.1697	3.17399	3.11371	3.2868	3.29101	3.32755
2.49	1.21527	1.17859	1.18821	1.49824	1.43822	1.40144	2.15606	2.06884	1.91598	2.71785	2.56868	2.59541	3.16626	3.17007	3.11244	3.289	3.29234	3.3222
2.49333	1.20951	1.18192	1.18637	1.49786	1.43815	1.40056	2.1538	2.07058	1.92015	2.71651	2.56979	2.58827	3.16905	3.17046	3.11237	3.28467	3.29484	3.32092
2.49667	1.21162	1.18084	1.19157	1.50113	1.44111	1.39817	2.15279	2.07345	1.91605	2.71532	2.57063	2.58967	3.16992	3.171	3.11614	3.2847	3.29623	3.32931
2.5	1.21186	1.18243	1.18948	1.50284	1.43545	1.40505	2.14906	2.07583	1.91468	2.72359	2.56936	2.58507	3.16865	3.16561	3.10826	3.28673	3.2908	3.31995
2.50333	1.21545	1.18284	1.18588	1.50196	1.43996	1.40625	2.15364	2.0763	1.91632	2.72161	2.57563	2.59492	3.16552	3.17316	3.10992	3.28571	3.29102	3.32397
2.50667	1.20813	1.18256	1.19247	1.49663	1.44325	1.40462	2.15701	2.07552	1.91429	2.71861	2.56726	2.58768	3.16891	3.16888	3.10958	3.28422	3.29216	3.32387
2.51	1.21275	1.18592	1.19373	1.49778	1.44138	1.39951	2.15958	2.07743	1.91935	2.72165	2.56651	2.58483	3.16662	3.16956	3.10731	3.28636	3.29202	3.32166
2.51333	1.20988	1.18216	1.19032	1.49957	1.44176	1.40713	2.15558	2.0717	1.91649	2.72411	2.56618	2.58883	3.16808	3.17031	3.11315	3.28254	3.29267	3.32584
2.51667	1.2154	1.18609	1.18986	1.49548	1.43928	1.40017	2.15503	2.07351	1.91523	2.71962	2.57125	2.58477	3.16759	3.16544	3.11162	3.27928	3.28748	3.32412
2.52	1.21502	1.18373	1.19123	1.49827	1.43904	1.40267	2.15627	2.07406	1.91667	2.71909	2.56903	2.59132	3.1723	3.16983	3.11138	3.28735	3.28863	3.32629
2.52333	1.21661	1.18414	1.1846	1.49979	1.44423	1.40858	2.15441	2.07749	1.91961	2.71791	2.57394	2.59014	3.17194	3.17168	3.10724	3.28904	3.29715	3.32182
2.52667	1.21384	1.18401	1.19074	1.4974	1.44375	1.40267	2.15993	2.07851	1.91952	2.71835	2.56834	2.59195	3.16608	3.17127	3.11037	3.28586	3.2915	3.32198
2.53	1.21365	1.18419	1.19089	1.50319	1.44204	1.40587	2.16005	2.07302	1.92172	2.71923	2.56844	2.58873	3.16495	3.17022	3.10627	3.2878	3.29247	3.32033
2.53333	1.21758	1.18118	1.19576	1.4996	1.44743	1.40592	2.1579	2.07511	1.91825	2.72202	2.56831	2.59272	3.16684	3.17206	3.10857	3.28563	3.29085	3.31906
2.53667	1.21005	1.18681	1.19081	1.50103	1.44318	1.40429	2.15183	2.08461	1.91831	2.72466	2.57088	2.59129	3.16872	3.16831	3.11023	3.28932	3.29277	3.32191
2.54	1.21152	1.1844	1.19382	1.49814	1.44471	1.40158	2.1605	2.07758	1.92057	2.72092	2.56831	2.59011	3.16725	3.17375	3.11294	3.28421	3.28836	3.32149
2.54333	1.21721	1.18727	1.19123	1.50028	1.44518	1.40737	2.15718	2.07619	1.92363	2.71547	2.56706	2.59474	3.16233	3.17468	3.11087	3.28674	3.28823	3.32436
2.54667	1.21325	1.18267	1.19695	1.49736	1.44836	1.40462	2.15758	2.08196	1.92536	2.72371	2.57031	2.59484	3.1658	3.16736	3.10924	3.2811	3.28991	3.32129
2.55	1.21562	1.18893	1.19157	1.50224	1.44737	1.40715	2.15686	2.07828	1.92173	2.71861	2.57084	2.59327	3.16843	3.16929	3.10554	3.28326	3.29494	3.32084
2.55333	1.21856	1.1891	1.19409	1.49903	1.45025	1.40859	2.15807	2.08123	1.92264	2.72741	2.56735	2.59236	3.16415	3.17501	3.10192	3.28426	3.29114	3.3238
2.55667	1.2186	1.18738	1.19967	1.49635	1.45209	1.40614	2.1544	2.08142	1.92265	2.72043	2.56979	2.59262	3.1672	3.16969	3.11017	3.28211	3.28525	3.32147
2.56	1.21603	1.18667	1.19239	1.50301	1.44783	1.40993	2.15812	2.08503	1.91808	2.71611	2.56506	2.59088	3.1705	3.16894	3.10967	3.28383	3.29197	3.32099
2.56333	1.21905	1.1893	1.19883	1.50253	1.44834	1.40589	2.15627	2.07774	1.92369	2.72583	2.56949	2.59511	3.16323	3.1714	3.10745	3.28614	3.2928	3.31918
2.56667	1.21464	1.18902	1.19429	1.50102	1.45006	1.4087	2.15298	2.0781	1.92104	2.72555	2.56881	2.59272	3.16473	3.17335	3.10784	3.27859	3.29022	3.3228
2.57	1.22353	1.19252	1.19304	1.49875	1.45702	1.41189	2.15934	2.07999	1.9224	2.72018	2.57054	2.59512	3.16631	3.17064	3.1097	3.28445	3.2873	3.32067
2.57333	1.21333	1.18976	1.19607	1.50092	1.44704	1.4081	2.15728	2.07761	1.92596	2.72464	2.56932	2.59689	3.16792	3.16838	3.10757	3.28423	3.28704	3.3206
2.57667	1.21645	1.19368	1.19373	1.50095	1.44359	1.40892	2.15545	2.08086	1.92101	2.72142	2.57294	2.59345	3.16318	3.16465	3.10826	3.28189	3.28576	3.31964
2.58	1.21631	1.18944	1.19845	1.49737	1.45899	1.41168	2.16007	2.08405	1.92401	2.72122	2.56652	2.58991	3.16816	3.17419	3.10712	3.28239	3.29122	3.32215
2.58333	1.21729	1.19199	1.20017	1.50067	1.44782	1.41161	2.15498	2.07779	1.928	2.72248	2.56631	2.59208	3.16951	3.16612	3.10759	3.27676	3.28783	3.32272
2.58667	1.21448	1.18916	1.19663	1.50029	1.45226	1.40876	2.15997	2.08313	1.92351	2.72162	2.57237	2.59721	3.16974	3.16988	3.10862	3.28414	3.28545	3.31933
2.59	1.21877	1.19413	1.19733	1.50224	1.45427	1.41094	2.16075	2.08267	1.92751	2.7256	2.56809	2.58951	3.16438	3.1692	3.10781	3.28101	3.29253	3.31947
2.59333	1.21463	1.19033	1.20295	1.50377	1.45702	1.4079	2.15764	2.08356	1.929	2.72179	2.57065	2.59511	3.16201	3.16819	3.10743	3.28368	3.29035	3.31883
2.59667	1.21643	1.19889	1.20446	1.49958	1.45277	1.41291	2.15729	2.07789	1.92332	2.72419	2.57146	2.59706	3.17005	3.17175	3.10665	3.28164	3.28744	3.31799
2.6	1.21891	1.19484	1.19721	1.50414	1.45368	1.41217	2.15759	2.0829	1.92202	2.72391	2.57147	2.59841	3.1653	3.16961	3.10843	3.27931	3.28621	3.31711
2.60333	1.22138	1.19591	1.19671	1.50273	1.45493	1.41392	2.15994	2.07919	1.92626	2.72768	2.57254	2.59928	3.16401	3.16886	3.10543	3.28496	3.28642	3.31356
2.60667	1.22389	1.1913	1.19928	1.50281	1.45775	1.41205	2.15229	2.08045	1.9296	2.72612	2.57518	2.59857	3.16372	3.17105	3.10681	3.27977	3.28801	3.32133
2.61	1.21995	1.19459	1.19793	1.50224	1.4587	1.41519	2.15858	2.08178	1.92835	2.7239	2.57103	2.59322	3.16077	3.17042	3.10492	3.28037	3.2913	3.32093
2.61333	1.22005	1.20082	1.19658	1.50126	1.45292	1.41439	2.161	2.08513	1.92545	2.7255	2.57604	2.5946	3.16277	3.16731	3.11142	3.28071	3.29322	3.32269
2.61667	1.21958	1.19742	1.20181	1.50229	1.45328	1.40922	2.16508	2.08336	1.92563	2.72652	2.57112	2.59229	3.16884	3.16456	3.10563	3.28278	3.28835	3.31387
2.62	1.22226	1.19549	1.20587	1.50554	1.45761	1.41293	2.15542	2.08413	1.92784	2.72502	2.57152	2.59432	3.16225	3.17469	3.11054	3.28419	3.28595	3.31479
2.62333	1.22217	1.19273	1.2029	1.50311	1.45672	1.41484	2.15673	2.08158	1.92684	2.72427	2.57339	2.59378	3.16645	3.16557	3.11112	3.27972	3.28882	3.32019
2.62667	1.22607	1.19605	1.20292	1.49672	1.45491	1.41605	2.15904	2.08437	1.93052	2.72665	2.5726	2.59315	3.16422	3.16731	3.10762	3.28408	3.28768	3.32251
2.63	1.21986	1.19873	1.20678	1.50167	1.45369	1.41036	2.1584	2.08836	1.93045	2.72803	2.577	2.59875	3.16363	3.168	3.10895	3.28151	3.28655	3.31828
2.63333	1.21999	1.19706	1.20083	1.50097	1.46022	1.41346	2.15733	2.08396	1.92405	2.7242	2.57506	2.59461	3.16318	3.16781	3.10909	3.2835	3.29004	3.3184
2.63667	1.21827	1.19892	1.19787	1.50428	1.45953	1.41413	2.16227	2.08532	1.92982	2.72674	2.57336	2.598	3.16826	3.16447	3.10447	3.28165	3.29181	3.31864
2.64	1.22487	1.19764	1.20482	1.50442	1.46081	1.41807	2.16263	2.09142	1.928	2.72402	2.5741	2.59287	3.16002	3.16973	3.10896	3.2819	3.28702	3.31551
2.64333	1.22009	1.19623	1.2028	1.50346	1.46016	1.41566	2.1615	2.08541	1.92764	2.72394	2.57602	2.6006	3.16647	3.16831	3.10757	3.27908	3.28292	3.31753
2.64667	1.22278	1.19524	1.20457	1.50558	1.45967	1.41977	2.16156	2.08352	1.92708	2.73098	2.56976	2.59462	3.16412	3.16415	3.10858	3.28215	3.28739	3.31846
2.65	1.2171	1.19696	1.20785	1.50436	1.45917	1.41614	2.16021	2.08678	1.92549	2.72828	2.57224	2.5955	3.16007	3.16729	3.10918	3.28388	3.2813	3.31957
2.65333	1.21921	1.20105	1.20213	1.51155	1.4578	1.41896	2.16104	2.08717	1.92756	2.72989	2.57418	2.59768	3.15595	3.16591	3.10885	3.27989	3.28749	3.32336
2.65667	1.21863	1.2027	1.20523	1.49579	1.45561	1.41165	2.1593	2.08647	1.925	2.72621	2.57502	2.60241	3.16428	3.16838	3.10519	3.28034	3.28499	3.32191
2.66	1.22006	1.19817	1.2067	1.50321	1.46607	1.4165	2.15812	2.08768	1.92362	2.72535	2.57167	2.5997	3.16014	3.16705	3.11209	3.28005	3.28638	3.31559
2.66333	1.2215	1.19741	1.20597	1.50773	1.45917	1.41567	2.15694	2.08639	1.92273	2.7242	2.57644	2.59584	3.15727	3.16747	3.10633	3.2798	3.28801	3.31489
2.66667	1.22507	1.19707	1.20772	1.50495	1.46007	1.41859	2.1654	2.08946	1.9277	2.72611	2.56986	2.59492	3.16718	3.16978	3.10738	3.28089	3.2893	3.31832
2.67	1.22237	1.20066	1.20724	1.50155	1.45652	1.41711	2.15484	2.08322	1.92616	2.72156	2.57406	2.59886	3.15756	3.17152	3.11108	3.28	3.28672	3.3133
2.67333	1.22064	1.2071	1.20927	1.50383	1.4619	1.41462	2.16184	2.09061	1.9273	2.72446	2.57614	2.59861	3.16259	3.16336	3.10647	3.27807	3.29326	3.31895
2.67667	1.2227	1.19891	1.2099	1.50497	1.46643	1.41655	2.16135	2.08804	1.93098	2.72901	2.57615	2.59885	3.16132	3.16714	3.10959	3.27561	3.28453	3.31647
2.68	1.22237	1.20359	1.20532	1.50643	1.46204	1.42298	2.15803	2.08922	1.93134	2.72549	2.58122	2.60019	3.16414	3.17016	3.10396	3.27683	3.2886	3.31479
2.68333	1.22379	1.19972	1.21068	1.50672	1.46244	1.41709	2.1607	2.0848	1.92767	2.72925	2.57049	2.59749	3.16146	3.16533	3.10805	3.27969	3.28776	3.31577
2.68667	1.225	1.20422	1.21066	1.50148	1.46124	1.41546	2.16421	2.08815	1.9245	2.72814	2.58031	2.59495	3.1615	3.16757	3.10904	3.28104	3.28541	3.31727
2.69	1.22429	1.2033	1.20733	1.50124	1.46278	1.42245	2.1645	2.08477	1.93402	2.72348	2.5775	2.59705	3.16345	3.16278	3.10901	3.27934	3.2845	3.31625
2.69333	1.22209	1.20538	1.21114	1.50593	1.46318	1.41843	2.15737	2.08724	1.92717	2.72319	2.57577	2.60182	3.15685	3.16743	3.10892	3.27325	3.28749	3.32253
2.69667	1.22574	1.20796	1.20902	1.50288	1.46616	1.41843	2.16309	2.08657	1.93387	2.72767	2.57461	2.5961	3.16412	3.16734	3.10644	3.27946	3.28636	3.31952
2.7	1.22174	1.20348	1.21149	1.50885	1.46205	1.42334	2.16549	2.08685	1.93084	2.73032	2.57845	2.60003	3.15891	3.17122	3.10978	3.27762	3.28336	3.31762
2.70333	1.22296	1.20107	1.21162	1.50389	1.46577	1.41964	2.15571	2.08623	1.93	2.72754	2.57838	2.5971	3.16685	3.17392	3.10595	3.27552	3.2827	3.31617
2.70667	1.22251	1.201	1.21339	1.50105	1.46509	1.42036	2.16401	2.08997	1.93397	2.72236	2.578	2.59937	3.15897	3.16109	3.10431	3.28207	3.28248	3.32213
2.71	1.22341	1.20312	1.2123	1.50425	1.46796	1.42332	2.16388	2.09029	1.93281	2.72984	2.57765	2.60122	3.15841	3.165	3.10742	3.27935	3.28983	3.31828
2.71333	1.22422	1.20788	1.20713	1.50155	1.46458	1.42457	2.1613	2.0863	1.93325	2.72761	2.57825	2.59544	3.15782	3.16497	3.10602	3.27533	3.28541	3.31702
2.71667	1.2232	1.20457	1.21504	1.50156	1.46564	1.41566	2.16503	2.08851	1.93013	2.72743	2.57281	2.58985	3.16597	3.16408	3.11031	3.27736	3.28382	3.31433
2.72	1.2222	1.20412	1.20784	1.50571	1.47154	1.4237	2.16611	2.08888	1.93631	2.72845	2.577	2.59275	3.16383	3.16254	3.10809	3.27841	3.28368	3.32093
2.72333	1.2285	1.20441	1.21323	1.50613	1.46577	1.41938	2.15877	2.08835	1.93299	2.72376	2.58339	2.6037	3.16335	3.16766	3.109	3.27897	3.28778	3.31439
2.72667	1.22573	1.20839	1.21033	1.50704	1.46688	1.42254	2.16231	2.08864	1.93115	2.72513	2.57748	2.59809	3.1656	3.16515	3.10262	3.27595	3.28771	3.31705
2.73	1.22773	1.20072	1.21455	1.50835	1.46647	1.42905	2.16055	2.08757	1.93356	2.73209	2.58159	2.5963	3.16338	3.16232	3.10068	3.27696	3.2869	3.31667
2.73333	1.22443	1.2068	1.2141	1.50762	1.46754	1.42398	2.16174	2.08963	1.9347	2.72667	2.57191	2.59535	3.1618	3.16752	3.10594	3.27561	3.28309	3.31911
2.73667	1.22692	1.20876	1.21355	1.50551	1.47074	1.42311	2.15833	2.08788	1.93322	2.72137	2.57279	2.59626	3.1616	3.16281	3.10604	3.27472	3.28536	3.3117
2.74	1.22511	1.20931	1.21422	1.5071	1.46783	1.4225	2.16053	2.09126	1.93477	2.72605	2.58143	2.6016	3.16177	3.16207	3.10909	3.28025	3.28123	3.31385
2.74333	1.22446	1.20544	1.21635	1.5088	1.46924	1.42158	2.15909	2.09345	1.93474	2.72317	2.58314	2.59827	3.16534	3.16399	3.10865	3.27576	3.28419	3.31383
2.74667	1.22482	1.2087	1.21342	1.51409	1.46998	1.42263	2.16489	2.09541	1.93253	2.72697	2.58154	2.60287	3.16497	3.16527	3.10925	3.27115	3.28442	3.31661
2.75	1.22538	1.20251	1.21921	1.50084	1.47432	1.42679	2.15916	2.09271	1.93515	2.73221	2.57941	2.60309	3.15828	3.16687	3.10683	3.27388	3.28487	3.3192
2.75333	1.22502	1.20314	1.21558	1.50684	1.4748	1.42328	2.15772	2.09301	1.94063	2.7262	2.57637	2.59876	3.15237	3.16492	3.10391	3.27348	3.28455	3.31364
2.75667	1.2276	1.21051	1.21634	1.50232	1.47055	1.42132	2.15965	2.08777	1.93314	2.72531	2.57574	2.59819	3.15614	3.16223	3.10588	3.2794	3.28613	3.31258
2.76	1.22727	1.20996	1.21479	1.50402	1.46815	1.42158	2.15951	2.09293	1.92949	2.72425	2.57447	2.59977	3.15533	3.16196	3.10454	3.27399	3.28409	3.31519
2.76333	1.22691	1.20582	1.21011	1.5079	1.47508	1.43045	2.16122	2.0881	1.93548	2.72886	2.58324	2.60231	3.15935	3.16486	3.10753	3.27555	3.27988	3.31327
2.76667	1.23139	1.20849	1.21745	1.50492	1.47234	1.42648	2.15945	2.09373	1.93547	2.72345	2.5793	2.60067	3.15332	3.16624	3.10741	3.27407	3.28782	3.31923
2.77	1.22754	1.20542	1.21535	1.50885	1.4706	1.42288	2.16009	2.09151	1.93981	2.7303	2.57973	2.59795	3.15607	3.16156	3.10468	3.27365	3.28498	3.31121
2.77333	1.2238	1.21294	1.21808	1.50576	1.47392	1.42659	2.16404	2.0911	1.9345	2.7233	2.57769	2.6019	3.15886	3.16437	3.10251	3.27583	3.28629	3.31106
2.77667	1.22468	1.20905	1.21699	1.50301	1.47648	1.42815	2.16222	2.09127	1.93616	2.73097	2.57954	2.5947	3.15468	3.16089	3.10597	3.27222	3.28566	3.31789
2.78	1.22907	1.20988	1.21511	1.51049	1.47898	1.42677	2.16209	2.09277	1.93995	2.73047	2.58336	2.60111	3.15861	3.1638	3.10504	3.27351	3.28134	3.31621
2.78333	1.23053	1.20578	1.216	1.50968	1.47457	1.42619	2.1615	2.09072	1.9364	2.72692	2.58281	2.5968	3.15686	3.16032	3.10482	3.27472	3.28383	3.31712
2.78667	1.22612	1.20732	1.22012	1.50691	1.47625	1.42943	2.16122	2.09723	1.936	2.72953	2.58038	2.59909	3.15557	3.1653	3.10567	3.27256	3.28495	3.31236
2.79	1.22724	1.21297	1.22372	1.51071	1.47364	1.42565	2.16588	2.09502	1.93368	2.72725	2.57982	2.59665	3.16142	3.16542	3.10458	3.2738	3.28719	3.31136
2.79333	1.22719	1.21656	1.21844	1.50599	1.47424	1.42942	2.15963	2.09359	1.93734	2.72531	2.57968	2.5968	3.15961	3.16507	3.10609	3.27467	3.28049	3.31063
2.79667	1.22417	1.20841	1.21348	1.50483	1.47781	1.43007	2.16059	2.0948	1.93887	2.72811	2.58123	2.59917	3.16038	3.16659	3.10679	3.2717	3.28272	3.31197
2.8	1.22804	1.21493	1.22091	1.50782	1.47324	1.4288	2.16097	2.09106	1.93237	2.7327	2.58645	2.60041	3.15583	3.1601	3.10343	3.27649	3.28167	3.31702
2.80333	1.22768	1.21399	1.21359	1.50736	1.477	1.42577	2.16596	2.09377	1.93665	2.72528	2.58034	2.60155	3.15528	3.15941	3.10444	3.27386	3.28051	3.31269
2.80667	1.23409	1.21371	1.2197	1.50552	1.47189	1.43167	2.16289	2.09846	1.93898	2.7306	2.58419	2.59844	3.15454	3.16184	3.10582	3.27344	3.28156	3.31133
2.81	1.22499	1.21413	1.2223	1.50578	1.4782	1.42993	2.16687	2.0981	1.93766	2.73096	2.58391	2.60137	3.16253	3.16314	3.10821	3.27841	3.2814	3.31153
2.81333	1.23091	1.21232	1.22077	1.50866	1.47857	1.43423	2.16644	2.09555	1.94028	2.72228	2.5779	2.59799	3.15632	3.15818	3.10308	3.27707	3.28542	3.31904
2.81667	1.22474	1.21674	1.22039	1.50627	1.47537	1.42895	2.15982	2.09737	1.9349	2.732	2.57674	2.60107	3.15402	3.15979	3.10655	3.26718	3.27793	3.31521
2.82	1.22983	1.21604	1.22011	1.50514	1.48085	1.42591	2.15824	2.09368	1.93115	2.73002	2.58163	2.60004	3.15605	3.16164	3.10792	3.27221	3.28374	3.31569
2.82333	1.22876	1.21479	1.21598	1.51229	1.47379	1.43243	2.16542	2.09467	1.93653	2.73159	2.58319	2.60443	3.15406	3.16232	3.10558	3.27429	3.28222	3.30804
2.82667	1.23268	1.21791	1.21802	1.50374	1.4809	1.42931	2.16023	2.09808	1.93812	2.72966	2.57798	2.6019	3.15524	3.15963	3.10494	3.27107	3.28226	3.31238
2.83	1.23489	1.21615	1.21693	1.50558	1.48028	1.4323	2.15934	2.09847	1.9364	2.72187	2.58068	2.60506	3.15647	3.15831	3.10482	3.27379	3.27967	3.309
2.83333	1.23221	1.21298	1.22694	1.50743	1.4735	1.42936	2.1635	2.09107	1.93637	2.72508	2.58107	2.60195	3.15592	3.16092	3.10574	3.26842	3.28129	3.31241
2.83667	1.23253	1.21553	1.21736	1.50939	1.48103	1.42818	2.1615	2.09695	1.93901	2.73333	2.57856	2.60362	3.15392	3.15716	3.10086	3.27222	3.28297	3.31097
2.84	1.23254	1.2181	1.22523	1.5044	1.48247	1.43273	2.16205	2.0976	1.93365	2.7269	2.58336	2.60572	3.15137	3.16448	3.10166	3.27497	3.28506	3.31034
2.84333	1.23194	1.21469	1.2204	1.50991	1.48064	1.43212	2.16715	2.09612	1.93687	2.73048	2.58111	2.60374	3.1576	3.15934	3.10728	3.27343	3.28031	3.31484
2.84667	1.22531	1.21676	1.22346	1.51054	1.47723	1.43067	2.16158	2.10045	1.93838	2.73105	2.57686	2.60008	3.15566	3.15974	3.09794	3.26787	3.27929	3.3068
2.85	1.23305	1.22187	1.22141	1.50129	1.47705	1.42928	2.16653	2.09698	1.94039	2.72456	2.58103	2.60307	3.15381	3.16288	3.10499	3.26806	3.27556	3.31334
2.85333	1.23239	1.22155	1.22944	1.50893	1.48507	1.43004	2.16117	2.09793	1.94089	2.72614	2.57914	2.60137	3.15996	3.15639	3.10185	3.26796	3.27734	3.30908
2.85667	1.23062	1.21833	1.22355	1.50836	1.48581	1.43045	2.16238	2.09653	1.94179	2.7281	2.58392	2.60021	3.15727	3.15655	3.10309	3.26999	3.27757	3.31491
2.86	1.23321	1.21851	1.2228	1.51094	1.48595	1.43615	2.16323	2.0976	1.93626	2.72194	2.58231	2.60261	3.15457	3.16043	3.10347	3.27123	3.28011	3.31096
2.86333	1.23013	1.21863	1.22512	1.51004	1.4805	1.43691	2.16137	2.09748	1.93863	2.72839	2.57735	2.60358	3.15196	3.15484	3.10202	3.26745	3.27822	3.31071
2.86667	1.23211	1.22142	1.23189	1.50433	1.48067	1.43866	2.16253	2.09705	1.94152	2.72176	2.58348	2.60727	3.15206	3.16027	3.10285	3.26988	3.2771	3.30965
2.87	1.22897	1.21922	1.22771	1.50593	1.48636	1.43687	2.16105	2.09875	1.94179	2.72785	2.5839	2.60431	3.1595	3.15688	3.10412	3.27101	3.27704	3.31418
2.87333	1.23386	1.22462	1.22772	1.51125	1.48404	1.43487	2.1614	2.10054	1.93943	2.72823	2.5782	2.60089	3.15141	3.16239	3.09998	3.2681	3.27656	3.30727
2.87667	1.22959	1.21869	1.22547	1.50802	1.4864	1.43882	2.1633	2.10022	1.94232	2.73158	2.57689	2.60156	3.15393	3.15785	3.0995	3.26714	3.28238	3.31252
2.88	1.2302	1.21931	1.22932	1.51021	1.48464	1.43215	2.16797	2.09584	1.94057	2.73074	2.58429	2.60492	3.15803	3.16208	3.09898	3.26725	3.27805	3.31686
2.88333	1.23343	1.22174	1.22612	1.5074	1.48626	1.43344	2.16582	2.09777	1.94186	2.72786	2.57625	2.60154	3.15521	3.15334	3.10602	3.26552	3.27964	3.30992
2.88667	1.23151	1.22118	1.22531	1.51156	1.48076	1.43515	2.16688	2.09981	1.94142	2.72574	2.58058	2.6006	3.16036	3.15654	3.10344	3.27146	3.27876	3.30993
2.89	1.23405	1.21781	1.22906	1.50534	1.48482	1.43486	2.16145	2.0981	1.94539	2.72971	2.58204	2.60526	3.15776	3.15649	3.10469	3.26847	3.27962	3.31177
2.89333	1.2327	1.22294	1.22932	1.50818	1.48622	1.43977	2.16387	2.10136	1.942	2.73095	2.58306	2.5996	3.15186	3.15622	3.10686	3.26975	3.28366	3.31151
2.89667	1.23347	1.22492	1.23063	1.50865	1.48928	1.43413	2.16486	2.10113	1.94281	2.72752	2.58468	2.60245	3.15462	3.15698	3.10625	3.27567	3.27577	3.3116
2.9	1.22368	1.22092	1.23052	1.50764	1.48159	1.43535	2.16206	2.09947	1.93685	2.73004	2.57754	2.60574	3.15285	3.15702	3.1043	3.2629	3.27491	3.30896
2.90333	1.2312	1.22231	1.23113	1.50324	1.48634	1.43445	2.16673	2.09535	1.94285	2.72477	2.58495	2.6024	3.15476	3.15355	3.10221	3.27054	3.27616	3.30354
2.90667	1.23517	1.22052	1.23176	1.50347	1.48929	1.43093	2.15902	2.09944	1.93837	2.72879	2.58702	2.60323	3.15385	3.15641	3.10334	3.26963	3.2753	3.30913
2.91	1.23064	1.22147	1.2291	1.50659	1.48634	1.43349	2.16725	2.10025	1.94461	2.7258	2.58044	2.60423	3.14827	3.15545	3.10171	3.2661	3.27388	3.31105
2.91333	1.23009	1.22693	1.23494	1.50602	1.48424	1.43559	2.15841	2.09794	1.9396	2.72612	2.57727	2.60632	3.15422	3.15436	3.10609	3.27043	3.27564	3.30661
2.91667	1.23403	1.22006	1.22866	1.50571	1.48819	1.44063	2.16333	2.0966	1.94345	2.72843	2.58236	2.60591	3.15444	3.15661	3.10094	3.26908	3.2731	3.31037
2.92	1.23219	1.22736	1.23321	1.50622	1.49039	1.4348	2.16331	2.09916	1.94394	2.72568	2.58014	2.60617	3.14756	3.16014	3.10053	3.27156	3.2789	3.30767
2.92333	1.23515	1.22484	1.23254	1.51326	1.49165	1.43557	2.16057	2.09934	1.94107	2.72821	2.57864	2.60415	3.15531	3.15864	3.10014	3.26822	3.2778	3.30646
2.92667	1.23328	1.23228	1.23002	1.51013	1.48612	1.43493	2.16403	2.10024	1.94275	2.72871	2.58585	2.60328	3.14753	3.15523	3.10506	3.26819	3.2791	3.31251
2.93	1.23339	1.22596	1.22755	1.50988	1.489	1.43111	2.16175	2.09737	1.9451	2.72775	2.58136	2.60484	3.14689	3.15594	3.09846	3.26609	3.27313	3.30625
2.93333	1.2393	1.22801	1.23851	1.5064	1.4905	1.44152	2.16644	2.10221	1.93867	2.73119	2.57776	2.60906	3.14873	3.15192	3.10319	3.26324	3.2765	3.30562
2.93667	1.23813	1.22221	1.23115	1.50794	1.49006	1.44132	2.16083	2.09717	1.93606	2.7272	2.58243	2.60168	3.14338	3.15423	3.09855	3.26951	3.27709	3.3065
2.94	1.2336	1.22024	1.22718	1.51009	1.48729	1.43967	2.16373	2.09738	1.94522	2.7294	2.58597	2.60343	3.15115	3.15118	3.10334	3.26931	3.2755	3.30536
2.94333	1.23254	1.22638	1.234	1.50656	1.48996	1.43839	2.16336	2.10385	1.94453	2.73243	2.58524	2.60567	3.14643	3.15836	3.10127	3.26737	3.27451	3.31023
2.94667	1.23285	1.232	1.23054	1.50444	1.4935	1.43982	2.16542	2.09578	1.94043	2.7269	2.57858	2.60497	3.15071	3.15369	3.09345	3.26715	3.27527	3.30806
2.95	1.23696	1.22817	1.22812	1.50592	1.48927	1.43568	2.15773	2.10027	1.94459	2.73477	2.58478	2.60991	3.15011	3.15279	3.10347	3.26464	3.27715	3.30347
2.95333	1.23401	1.23097	1.23317	1.50396	1.4879	1.4372	2.16289	2.10125	1.94342	2.72949	2.58105	2.60755	3.15316	3.15553	3.10191	3.27178	3.27463	3.30689
2.95667	1.23516	1.23187	1.23351	1.50629	1.49073	1.43864	2.1578	2.10159	1.94099	2.72928	2.58069	2.60567	3.15236	3.15399	3.10074	3.25965	3.27997	3.30349
2.96	1.22928	1.22914	1.23507	1.51119	1.49655	1.43647	2.16085	2.09928	1.94636	2.73489	2.58693	2.60319	3.14817	3.15373	3.09895	3.26421	3.27393	3.30368
2.96333	1.23501	1.22638	1.23419	1.50829	1.49585	1.44074	2.16181	2.10217	1.94546	2.7307	2.58489	2.6115	3.15142	3.15719	3.10206	3.26411	3.27138	3.30442
2.96667	1.23311	1.23306	1.23328	1.50649	1.48905	1.438	2.16155	2.10108	1.94087	2.72687	2.58059	2.60515	3.14994	3.15693	3.1031	3.26796	3.27585	3.30278
2.97	1.23535	1.22828	1.23654	1.50943	1.49442	1.43661	2.16485	2.10113	1.94477	2.73367	2.58546	2.60397	3.14679	3.15106	3.09926	3.26132	3.27341	3.30609
2.97333	1.23882	1.23094	1.23445	1.51017	1.49195	1.43634	2.16224	2.10391	1.9452	2.73041	2.58738	2.60566	3.14986	3.15834	3.10028	3.26677	3.27374	3.30472
2.97667	1.23387	1.22888	1.23518	1.50638	1.4928	1.44039	2.16288	2.10724	1.94477	2.72987	2.58404	2.60672	3.14913	3.15056	3.09695	3.26358	3.2764	3.30478
2.98	1.2392	1.2328	1.23626	1.50945	1.49764	1.43559	2.16644	2.10667	1.94423	2.73043	2.5804	2.59823	3.14881	3.15068	3.09805	3.26055	3.27124	3.30787
2.98333	1.23588	1.22944	1.23672	1.51006	1.49437	1.44302	2.16394	2.1019	1.94254	2.73188	2.58215	2.60994	3.14425	3.15381	3.09169	3.26336	3.26842	3.306
2.98667	1.23584	1.23578	1.23646	1.50511	1.49364	1.43972	2.16071	2.102	1.94288	2.72994	2.58095	2.60719	3.14813	3.15553	3.09843	3.25935	3.27355	3.30779
2.99	1.23895	1.23394	1.23728	1.50588	1.48991	1.44039	2.16461	2.09762	1.94858	2.73052	2.585	2.60485	3.15097	3.15523	3.1021	3.26199	3.27346	3.30585
2.99333	1.23754	1.22991	1.23603	1.50504	1.492	1.4385	2.16504	2.10389	1.95029	2.72988	2.58292	2.60238	3.14591	3.15188	3.09856	3.26004	3.27237	3.30043
2.99667	1.23602	1.22889	1.23592	1.50928	1.49232	1.44123	2.16347	2.10485	1.9438	2.73189	2.58032	2.60849	3.15034	3.14898	3.10057	3.2634	3.27112	3.30586
3	1.23445	1.23459	1.24049	1.50665	1.49543	1.44868	2.16704	2.10403	1.945	2.72925	2.58334	2.60167	3.15129	3.14762	3.09936	3.26426	3.27219	3.30472
3.00333	1.23764	1.23165	1.24015	1.50742	1.49471	1.44482	2.16175	2.10252	1.94601	2.7329	2.58325	2.60431	3.14415	3.15228	3.09936	3.26376	3.27397	3.3056
3.00667	1.23453	1.23161	1.24067	1.5072	1.49575	1.44729	2.1613	2.10516	1.94666	2.72939	2.58133	2.6081	3.15003	3.15229	3.09699	3.26527	3.27305	3.30383
3.01	1.23628	1.22939	1.23492	1.50874	1.49341	1.43917	2.16717	2.10273	1.94729	2.73468	2.58285	2.61074	3.14481	3.1509	3.1025	3.2592	3.26903	3.30303
3.01333	1.23647	1.22689	1.2328	1.5115	1.4973	1.44081	2.16779	2.10625	1.94299	2.73001	2.58772	2.60658	3.14988	3.14866	3.09735	3.26127	3.27168	3.29988
3.01667	1.23648	1.23475	1.23795	1.50778	1.49571	1.44244	2.16403	2.10135	1.94994	2.73427	2.58328	2.60733	3.14427	3.1515	3.09548	3.26538	3.26805	3.30533
3.02	1.23459	1.22708	1.24382	1.50896	1.49386	1.44078	2.16652	2.10433	1.94355	2.73005	2.58577	2.6029	3.14669	3.15195	3.09336	3.26235	3.27087	3.303
3.02333	1.24066	1.23386	1.23879	1.51068	1.49729	1.44478	2.16554	2.10667	1.94165	2.72993	2.57893	2.6082	3.14489	3.14989	3.09999	3.26142	3.26843	3.30518
3.02667	1.23383	1.23338	1.23946	1.5065	1.49719	1.44057	2.16154	2.10625	1.94587	2.72543	2.58204	2.602	3.14209	3.14846	3.09839	3.26056	3.27482	3.29994
3.03	1.24369	1.23501	1.23982	1.50729	1.50031	1.4411	2.1653	2.10371	1.94944	2.73095	2.58402	2.60238	3.14498	3.15293	3.09526	3.26603	3.26936	3.29667
3.03333	1.2384	1.2334	1.23042	1.50733	1.49952	1.44369	2.16391	2.10391	1.94548	2.72941	2.58555	2.605	3.14841	3.14712	3.10056	3.26286	3.27027	3.30264
3.03667	1.23494	1.23283	1.23568	1.51134	1.49735	1.44536	2.16606	2.102	1.94715	2.73226	2.57795	2.60591	3.14235	3.14705	3.09802	3.25939	3.27182	3.29874
3.04	1.23824	1.23339	1.24002	1.50853	1.49676	1.44253	2.16225	2.10187	1.94443	2.72954	2.5876	2.60189	3.14344	3.14988	3.09523	3.25358	3.2685	3.3056
3.04333	1.24081	1.23247	1.23876	1.51019	1.50271	1.44307	2.16956	2.1038	1.94227	2.73002	2.57983	2.61093	3.1443	3.15118	3.09382	3.2605	3.2643	3.30488
3.04667	1.23938	1.23968	1.24398	1.50766	1.49671	1.44683	2.16507	2.1032	1.94885	2.72874	2.58471	2.60783	3.14718	3.14557	3.09789	3.25815	3.26913	3.29657
3.05	1.23872	1.23682	1.24452	1.50688	1.501	1.44156	2.16481	2.1043	1.95005	2.73088	2.58722	2.60964	3.14614	3.14893	3.09688	3.25177	3.26753	3.30306
3.05333	1.23764	1.23877	1.23718	1.50802	1.49774	1.44762	2.16413	2.1023	1.94689	2.73162	2.58698	2.60232	3.14759	3.14621	3.09811	3.26467	3.26895	3.30594
3.05667	1.2388	1.23684	1.2408	1.50436	1.49645	1.44178	2.15484	2.10561	1.94771	2.73004	2.58729	2.60912	3.1437	3.14596	3.09824	3.25795	3.26856	3.29666
3.06	1.2406	1.23623	1.24049	1.50838	1.49484	1.4455	2.16377	2.10366	1.94318	2.73375	2.58282	2.60838	3.14209	3.14984	3.09815	3.25926	3.26848	3.30373
3.06333	1.24456	1.23725	1.24366	1.50663	1.49966	1.44235	2.16572	2.10203	1.94968	2.73297	2.58431	2.60172	3.14744	3.15108	3.09701	3.26147	3.27492	3.29691
3.06667	1.23958	1.23464	1.24242	1.50915	1.50498	1.44597	2.16383	2.10174	1.94623	2.72546	2.58568	2.61083	3.14947	3.1474	3.10129	3.25521	3.26412	3.30236
3.07	1.23376	1.23908	1.24325	1.50866	1.49612	1.4441	2.16309	2.10554	1.94679	2.72354	2.58548	2.60147	3.1457	3.14968	3.09516	3.26125	3.27029	3.29896
3.07333	1.23721	1.23517	1.24436	1.5097	1.50182	1.44751	2.16393	2.10148	1.94384	2.73121	2.58472	2.60593	3.14697	3.14713	3.09434	3.26227	3.26214	3.29945
3.07667	1.23943	1.23527	1.24222	1.50947	1.49965	1.44546	2.15825	2.1077	1.94853	2.73509	2.58743	2.60107	3.13994	3.14588	3.09439	3.26176	3.26454	3.29746
3.08	1.24008	1.23712	1.24396	1.50937	1.50078	1.43985	2.16192	2.104	1.94666	2.72193	2.5838	2.60795	3.14126	3.14888	3.09708	3.25773	3.27059	3.29511
3.08333	1.23954	1.23807	1.24177	1.5148	1.50245	1.44501	2.16482	2.11316	1.94511	2.73098	2.58164	2.60486	3.14653	3.14836	3.09431	3.2589	3.2719	3.30344
3.08667	1.24233	1.23614	1.24538	1.51235	1.50118	1.44782	2.16402	2.10114	1.94853	2.73503	2.59014	2.60801	3.14676	3.14742	3.09686	3.25569	3.263	3.3006
3.09	1.23703	1.23854	1.24529	1.50646	1.50447	1.45194	2.16422	2.10579	1.94776	2.73223	2.58522	2.6066	3.1421	3.14759	3.09476	3.25775	3.2684	3.30454
3.09333	1.23489	1.243	1.2429	1.50509	1.50092	1.44645	2.16669	2.10362	1.94441	2.72682	2.58321	2.60234	3.14283	3.14848	3.09225	3.25814	3.26577	3.29895
3.09667	1.23863	1.24507	1.24395	1.51366	1.49925	1.44589	2.16845	2.10726	1.94912	2.72878	2.58545	2.61144	3.14342	3.14813	3.09913	3.26007	3.26165	3.29968
3.1	1.239	1.23576	1.2429	1.50741	1.50361	1.44888	2.16353	2.10258	1.95037	2.72549	2.5815	2.60765	3.14352	3.14661	3.09609	3.26037	3.26225	3.2988
3.10333	1.23612	1.23641	1.24876	1.50882	1.50818	1.44501	2.16393	2.10919	1.95124	2.72617	2.58708	2.60763	3.14576	3.14525	3.0933	3.26092	3.26474	3.30038
3.10667	1.24276	1.23872	1.24707	1.50989	1.50789	1.44578	2.16642	2.10618	1.94857	2.72749	2.58547	2.60804	3.14061	3.14614	3.09592	3.252	3.26616	3.29657
3.11	1.2411	1.23695	1.24425	1.51245	1.50494	1.45015	2.16255	2.10082	1.95138	2.73433	2.584	2.60551	3.14158	3.14479	3.09383	3.25381	3.26084	3.2939
3.11333	1.24023	1.24408	1.24531	1.50825	1.51025	1.45017	2.15926	2.10843	1.95228	2.72861	2.58665	2.6077	3.14868	3.14887	3.09527	3.25341	3.25989	3.30413
3.11667	1.23876	1.23767	1.24302	1.50231	1.50779	1.44877	2.16407	2.1051	1.95265	2.72902	2.58221	2.60724	3.14263	3.1435	3.09185	3.25664	3.26416	3.29824
3.12	1.23748	1.24144	1.24852	1.51296	1.50272	1.45471	2.16649	2.1078	1.95289	2.73404	2.58752	2.60485	3.1484	3.1459	3.09724	3.25814	3.2657	3.29773
3.12333	1.23968	1.2435	1.24617	1.50596	1.50594	1.44772	2.16384	2.10521	1.94172	2.7282	2.58223	2.60679	3.14177	3.14179	3.0925	3.25595	3.26411	3.29968
3.12667	1.24254	1.24067	1.24487	1.50735	1.50232	1.44725	2.16436	2.10237	1.94713	2.72931	2.58901	2.60636	3.14432	3.14298	3.10167	3.25285	3.26755	3.30391
3.13	1.24134	1.24183	1.24868	1.50741	1.51003	1.45341	2.16506	2.10542	1.95162	2.73593	2.58367	2.60212	3.14506	3.14212	3.09789	3.25746	3.26696	3.30138
3.13333	1.24827	1.24107	1.24765	1.51061	1.5066	1.44658	2.16175	2.11123	1.94966	2.72741	2.58558	2.60425	3.14031	3.14469	3.09088	3.25547	3.26711	3.29917
3.13667	1.23972	1.24646	1.24809	1.50773	1.50759	1.44978	2.1614	2.10504	1.95093	2.72211	2.58175	2.6069	3.1409	3.15064	3.09293	3.25658	3.26261	3.29478
3.14	1.2407	1.23878	1.24915	1.51209	1.5043	1.44792	2.15952	2.10487	1.95077	2.7275	2.58659	2.60538	3.14013	3.1446	3.09042	3.25131	3.26268	3.29655
3.14333	1.24672	1.23956	1.25016	1.5103	1.50544	1.4531	2.16488	2.10727	1.94774	2.72901	2.58556	2.61045	3.14098	3.14267	3.09199	3.252	3.2611	3.30123
3.14667	1.24283	1.24761	1.246	1.50689	1.50967	1.44777	2.1629	2.10614	1.94568	2.7328	2.58636	2.60144	3.14454	3.14314	3.09446	3.25752	3.2655	3.29737
3.15	1.24324	1.23991	1.24815	1.50905	1.50896	1.45202	2.16083	2.10663	1.95172	2.73075	2.58795	2.61255	3.14043	3.1432	3.09462	3.25166	3.26749	3.29939
3.15333	1.24015	1.24051	1.25161	1.50819	1.50942	1.45159	2.16168	2.10864	1.94891	2.72561	2.58509	2.60249	3.14035	3.14534	3.09697	3.25392	3.27121	3.30043
3.15667	1.23762	1.24304	1.24694	1.51061	1.50675	1.45252	2.15822	2.10942	1.94911	2.73095	2.58869	2.60463	3.13682	3.14466	3.09015	3.25491	3.27187	3.29749
3.16	1.24563	1.2431	1.25057	1.50748	1.51005	1.45194	2.16606	2.10614	1.95095	2.725	2.58395	2.61288	3.13601	3.14225	3.09354	3.2505	3.2609	3.29589
3.16333	1.24545	1.24465	1.25013	1.5065	1.50687	1.45403	2.16975	2.1123	1.94741	2.72483	2.58751	2.61126	3.13831	3.14526	3.08808	3.25654	3.26334	3.2935
3.16667	1.24269	1.23962	1.25355	1.50658	1.51076	1.45173	2.16193	2.10661	1.95	2.72928	2.58629	2.60945	3.13985	3.14748	3.09111	3.25553	3.26394	3.29258
3.17	1.246	1.24465	1.24714	1.50183	1.50477	1.45497	2.16171	2.10921	1.95217	2.72874	2.57964	2.60464	3.13672	3.14795	3.08805	3.25694	3.2621	3.29214
3.17333	1.23768	1.24615	1.24937	1.50905	1.51278	1.45635	2.16573	2.10733	1.94983	2.72998	2.58794	2.60632	3.13805	3.1428	3.09433	3.2512	3.26332	3.29526
3.17667	1.24307	1.25142	1.2549	1.50538	1.50526	1.44543	2.16484	2.11013	1.94949	2.7291	2.58681	2.60582	3.14034	3.14004	3.09391	3.2575	3.26659	3.29644
3.18	1.24767	1.24669	1.25118	1.50969	1.50518	1.44971	2.1666	2.10776	1.95205	2.72958	2.58904	2.60645	3.14475	3.14089	3.09878	3.25396	3.25926	3.293
3.18333	1.2383	1.25022	1.25101	1.50973	1.5032	1.45311	2.16413	2.10686	1.95068	2.72586	2.58582	2.60776	3.13897	3.13861	3.09031	3.25194	3.26623	3.29302
3.18667	1.24278	1.24832	1.25454	1.50873	1.51263	1.45061	2.16046	2.11275	1.95	2.72747	2.58921	2.60044	3.13335	3.14573	3.09446	3.25233	3.26371	3.29367
3.19	1.24464	1.24659	1.25069	1.51032	1.50762	1.45423	2.16349	2.10529	1.94985	2.72406	2.58937	2.60903	3.13928	3.14332	3.09957	3.2498	3.25907	3.29175
3.19333	1.24137	1.24778	1.25035	1.50635	1.51651	1.44834	2.16334	2.10748	1.94859	2.72617	2.58895	2.61251	3.13469	3.14087	3.09205	3.25393	3.26488	3.29179
3.19667	1.24329	1.24891	1.25015	1.50918	1.5085	1.45004	2.16385	2.10723	1.9568	2.72734	2.58564	2.60418	3.13994	3.14552	3.0977	3.2553	3.26435	3.29093
3.2	1.24327	1.25001	1.25367	1.50383	1.5119	1.45385	2.16304	2.11009	1.94857	2.73794	2.58618	2.60436	3.13819	3.13732	3.09134	3.25116	3.25811	3.29237
3.20333	1.24338	1.24371	1.25111	1.50913	1.51128	1.45486	2.16242	2.1078	1.95451	2.72765	2.58775	2.6122	3.13814	3.14326	3.08826	3.25374	3.26213	3.29325
3.20667	1.24202	1.2495	1.25155	1.50874	1.51137	1.45094	2.16005	2.10639	1.94982	2.72531	2.58748	2.60663	3.13533	3.14268	3.09478	3.25099	3.26388	3.29706
3.21	1.24536	1.24359	1.26006	1.50586	1.51005	1.45313	2.16455	2.11068	1.9545	2.72718	2.58631	2.60594	3.137	3.14221	3.08684	3.24953	3.25787	3.29873
3.21333	1.2442	1.24402	1.25249	1.5095	1.5119	1.45226	2.16695	2.11166	1.94934	2.72981	2.58653	2.61275	3.13889	3.14288	3.08975	3.24563	3.26243	3.29378
3.21667	1.24284	1.24628	1.25534	1.50739	1.50807	1.45407	2.1633	2.1122	1.95082	2.72498	2.58824	2.60377	3.13871	3.14202	3.08813	3.24797	3.25842	3.29054
3.22	1.24305	1.25007	1.2553	1.50202	1.50853	1.45497	2.15767	2.10417	1.95528	2.72635	2.583	2.60881	3.13242	3.14048	3.0918	3.25492	3.26341	3.29703
3.22333	1.24498	1.24686	1.25242	1.51053	1.51404	1.45158	2.16335	2.109	1.95097	2.72222	2.58513	2.60697	3.13384	3.13867	3.08876	3.24936	3.26093	3.28912
3.22667	1.24266	1.25029	1.25005	1.50952	1.51029	1.45645	2.16249	2.1124	1.95002	2.72827	2.58666	2.60404	3.13485	3.14084	3.08838	3.25338	3.26485	3.29021
3.23	1.24081	1.24905	1.25093	1.50921	1.5142	1.45461	2.16114	2.11089	1.95802	2.7333	2.59009	2.60582	3.14193	3.13578	3.09156	3.25195	3.26417	3.29067
3.23333	1.24483	1.24998	1.25221	1.50388	1.51577	1.45664	2.16347	2.10867	1.95119	2.72556	2.58692	2.61456	3.13254	3.13652	3.09338	3.25025	3.25925	3.29573
3.23667	1.24552	1.24897	1.25627	1.50953	1.51251	1.45965	2.16186	2.10683	1.95531	2.72935	2.59074	2.60696	3.12986	3.13646	3.09018	3.24974	3.26327	3.29148
3.24	1.24233	1.249	1.2578	1.50533	1.50996	1.45233	2.1663	2.1083	1.94856	2.72571	2.58724	2.60682	3.13342	3.14162	3.08888	3.24643	3.2601	3.2905
3.24333	1.24249	1.25069	1.25536	1.50696	1.51431	1.45726	2.16804	2.11074	1.95132	2.73015	2.58304	2.60588	3.13839	3.13815	3.09041	3.25331	3.26506	3.28602
3.24667	1.24385	1.24629	1.25351	1.50865	1.50962	1.45358	2.16583	2.10873	1.95412	2.7237	2.59047	2.60097	3.13407	3.1352	3.0954	3.25192	3.25754	3.28571
3.25	1.24744	1.25068	1.25746	1.50765	1.51598	1.45574	2.16571	2.11285	1.95377	2.72399	2.58238	2.60711	3.13654	3.13693	3.08843	3.24573	3.26122	3.29332
3.25333	1.24435	1.24999	1.25892	1.51087	1.51246	1.4534	2.16224	2.10955	1.95436	2.72771	2.58509	2.60778	3.13071	3.13555	3.09102	3.25585	3.25781	3.28958
3.25667	1.2435	1.24618	1.25788	1.50395	1.51584	1.45619	2.16615	2.11199	1.95389	2.725	2.58383	2.61008	3.13749	3.14284	3.08776	3.25414	3.26331	3.2896
3.26	1.24396	1.25053	1.25754	1.51235	1.51617	1.45699	2.15771	2.11175	1.95382	2.72231	2.59017	2.60924	3.13457	3.13525	3.09043	3.24846	3.26018	3.29194
3.26333	1.24845	1.24919	1.25323	1.50981	1.51861	1.45511	2.16574	2.10847	1.95095	2.72456	2.5874	2.60657	3.13098	3.13678	3.09195	3.24582	3.25345	3.28917
3.26667	1.2469	1.24989	1.25647	1.50693	1.52115	1.45214	2.16156	2.10644	1.95341	2.72857	2.58475	2.60627	3.13659	3.1423	3.09135	3.24885	3.26086	3.29349
3.27	1.24797	1.25227	1.25975	1.51357	1.51431	1.45459	2.16395	2.11262	1.95692	2.72571	2.58961	2.61041	3.13414	3.13302	3.08957	3.24684	3.25487	3.29656
3.27333	1.24493	1.25297	1.25671	1.50396	1.51741	1.45188	2.16261	2.11148	1.95214	2.7249	2.59193	2.60903	3.13609	3.13936	3.08528	3.24642	3.25448	3.29093
3.27667	1.24272	1.25313	1.26224	1.50734	1.51557	1.45547	2.15962	2.11009	1.94876	2.7265	2.58613	2.61129	3.13212	3.13751	3.08496	3.24755	3.25692	3.29083
3.28	1.24135	1.25494	1.25935	1.50807	1.51554	1.45459	2.16223	2.11271	1.9535	2.72959	2.58865	2.60964	3.13386	3.13751	3.09019	3.24669	3.25597	3.28987
3.28333	1.24228	1.25052	1.26192	1.50754	1.5185	1.45477	2.16079	2.11298	1.95055	2.72859	2.58598	2.61122	3.13226	3.13551	3.08666	3.24235	3.26017	3.28404
3.28667	1.24684	1.255	1.26156	1.50642	1.51986	1.46231	2.15925	2.11185	1.95319	2.72244	2.58827	2.6053	3.1334	3.13424	3.08399	3.24916	3.25486	3.28984
3.29	1.24189	1.25092	1.25706	1.509	1.5176	1.46137	2.15701	2.11522	1.95141	2.72755	2.58934	2.60895	3.13157	3.13348	3.08725	3.24375	3.25528	3.29143
3.29333	1.24574	1.25274	1.25437	1.50231	1.52	1.45549	2.15798	2.11295	1.95139	2.73125	2.58704	2.60708	3.13201	3.13233	3.08674	3.24674	3.25731	3.2843
3.29667	1.2476	1.25421	1.25774	1.51177	1.52155	1.46087	2.15668	2.10932	1.95809	2.73424	2.5804	2.61367	3.13416	3.13944	3.08751	3.24585	3.25644	3.28894
3.3	1.24446	1.2576	1.25916	1.50393	1.52049	1.45836	2.16536	2.10838	1.95569	2.72403	2.58586	2.60353	3.12705	3.1372	3.08787	3.24176	3.25568	3.28929
3.30333	1.24823	1.25348	1.26116	1.50847	1.51929	1.45797	2.16002	2.11324	1.9521	2.72632	2.58433	2.61157	3.13268	3.13393	3.0868	3.24896	3.25202	3.28867
3.30667	1.24945	1.25631	1.26341	1.51016	1.51604	1.46176	2.16604	2.10634	1.95526	2.72375	2.59013	2.60917	3.13427	3.13442	3.08671	3.2502	3.25714	3.28914
3.31	1.24393	1.2529	1.25784	1.50658	1.51647	1.45908	2.15759	2.11309	1.95688	2.72389	2.58728	2.60694	3.13705	3.13608	3.08945	3.24279	3.25337	3.28769
3.31333	1.24483	1.25334	1.2587	1.50711	1.51703	1.45538	2.16401	2.11242	1.95659	2.7278	2.5861	2.60685	3.13258	3.13909	3.09029	3.24933	3.25374	3.2903
3.31667	1.24592	1.25457	1.26224	1.5133	1.5201	1.45792	2.15768	2.10929	1.95618	2.73039	2.5895	2.61023	3.13515	3.1404	3.09009	3.24568	3.2542	3.29323
3.32	1.24922	1.25602	1.26187	1.50715	1.51716	1.45662	2.16042	2.10986	1.952	2.73035	2.59068	2.60915	3.12972	3.13836	3.0876	3.24717	3.25453	3.28622
3.32333	1.24585	1.25384	1.26767	1.50902	1.52201	1.45964	2.16125	2.10819	1.95089	2.72737	2.58984	2.61029	3.13057	3.13913	3.09176	3.24329	3.25155	3.2876
3.32667	1.24635	1.25435	1.26199	1.50816	1.52176	1.46114	2.16537	2.11299	1.95678	2.72557	2.58751	2.61132	3.13016	3.13578	3.08968	3.25385	3.25355	3.28978
3.33	1.24992	1.25753	1.2625	1.50841	1.51823	1.45848	2.16284	2.11516	1.95413	2.72928	2.58788	2.60641	3.12936	3.13536	3.09073	3.24344	3.24979	3.28151
3.33333	1.2502	1.25499	1.2584	1.50628	1.52113	1.45837	2.15882	2.11654	1.95214	2.72706	2.58438	2.61002	3.13018	3.13599	3.08904	3.24882	3.25208	3.28737
3.33667	1.2492	1.25526	1.26449	1.50474	1.51917	1.46314	2.1589	2.11316	1.95498	2.73121	2.59002	2.61277	3.13343	3.13535	3.08191	3.2417	3.25263	3.29021
3.34	1.24871	1.25249	1.25921	1.50636	1.52193	1.45869	2.15854	2.11686	1.9538	2.72749	2.58848	2.60655	3.13226	3.13344	3.08967	3.24635	3.2513	3.28605
3.34333	1.24955	1.25175	1.26783	1.50873	1.52143	1.45757	2.16004	2.11198	1.95502	2.72936	2.58504	2.61096	3.13337	3.13853	3.08879	3.24969	3.2534	3.28887
3.34667	1.24647	1.25515	1.26131	1.51035	1.5201	1.45874	2.15556	2.10999	1.95414	2.72615	2.5898	2.61281	3.13615	3.13776	3.08047	3.2417	3.24954	3.28708
3.35	1.24309	1.2598	1.2636	1.50998	1.52408	1.45866	2.16359	2.10648	1.95428	2.72448	2.58382	2.60765	3.12925	3.13331	3.08029	3.2413	3.25639	3.28369
3.35333	1.24743	1.25514	1.26412	1.50471	1.52452	1.46237	2.15969	2.11084	1.96017	2.72921	2.5853	2.60991	3.1295	3.13408	3.08525	3.24284	3.25456	3.28154
3.35667	1.24553	1.25537	1.26194	1.50361	1.51761	1.46044	2.16132	2.10961	1.95209	2.72208	2.58656	2.60775	3.12839	3.13477	3.08563	3.24113	3.25203	3.28844
3.36	1.24939	1.26096	1.26377	1.51205	1.52096	1.45583	2.15859	2.10899	1.95651	2.72626	2.58517	2.60633	3.1272	3.1335	3.08373	3.2407	3.25077	3.2863
3.36333	1.24703	1.25817	1.26454	1.5085	1.51747	1.45739	2.16228	2.11361	1.95422	2.72822	2.58725	2.6056	3.1347	3.13342	3.085	3.24724	3.25155	3.28389
3.36667	1.25003	1.25771	1.26232	1.50961	1.52575	1.46145	2.158	2.11144	1.95222	2.72967	2.58614	2.60909	3.12915	3.13317	3.08496	3.24011	3.24968	3.28925
3.37	1.24525	1.2592	1.26282	1.50805	1.52272	1.46011	2.15911	2.10949	1.95609	2.72391	2.58613	2.61392	3.12963	3.1294	3.08456	3.2412	3.25474	3.28057
3.37333	1.24925	1.2562	1.26464	1.50117	1.52486	1.45815	2.16248	2.11629	1.95007	2.72505	2.58914	2.61087	3.12551	3.13343	3.08443	3.24269	3.25544	3.28565
3.37667	1.24495	1.26023	1.26728	1.50436	1.52488	1.4599	2.16288	2.11348	1.9557	2.725	2.58491	2.61101	3.12671	3.13463	3.08585	3.24361	3.25159	3.28471
3.38	1.24346	1.25991	1.26377	1.50717	1.52157	1.45697	2.15701	2.11608	1.95666	2.73097	2.58492	2.60481	3.12799	3.13186	3.08616	3.24504	3.25057	3.28576
3.38333	1.24779	1.26117	1.26551	1.50803	1.52391	1.46032	2.16255	2.11231	1.95442	2.7236	2.58739	2.60778	3.13248	3.13337	3.08222	3.24031	3.2505	3.27912
3.38667	1.24622	1.26075	1.26702	1.5048	1.52561	1.46248	2.16036	2.11373	1.95483	2.72508	2.57993	2.60913	3.12761	3.13098	3.08616	3.24002	3.25588	3.2837
3.39	1.24967	1.26135	1.26675	1.5075	1.52405	1.46313	2.16354	2.11369	1.95554	2.72741	2.58681	2.61269	3.13095	3.13448	3.08569	3.24052	3.24992	3.28205
3.39333	1.25118	1.25671	1.26699	1.50856	1.52612	1.46206	2.16326	2.11067	1.95658	2.72385	2.58484	2.60857	3.13091	3.12971	3.08526	3.23793	3.24962	3.2785
3.39667	1.24847	1.26268	1.26575	1.50804	1.52818	1.45982	2.16032	2.11418	1.95573	2.7244	2.5855	2.60719	3.12931	3.13325	3.08245	3.24402	3.25124	3.28287
3.4	1.2462	1.26372	1.26367	1.50335	1.5269	1.46064	2.15681	2.11383	1.95257	2.72922	2.5885	2.60773	3.12618	3.1287	3.08471	3.2396	3.25029	3.27717
3.40333	1.25259	1.25974	1.26592	1.50655	1.52361	1.46119	2.1638	2.11289	1.94998	2.72324	2.58758	2.61336	3.12605	3.13096	3.08668	3.23625	3.25115	3.28577
3.40667	1.24729	1.26155	1.27244	1.50454	1.52951	1.46247	2.15911	2.11567	1.95843	2.72284	2.58375	2.61202	3.129	3.13001	3.08599	3.23987	3.24878	3.28371
3.41	1.24987	1.25738	1.27048	1.51136	1.52734	1.46635	2.15819	2.11574	1.95501	2.72125	2.58815	2.6102	3.13013	3.12978	3.08592	3.24127	3.25065	3.27988
3.41333	1.24903	1.26011	1.26685	1.50427	1.52357	1.46309	2.1607	2.11513	1.95482	2.72132	2.58671	2.61064	3.11967	3.13273	3.08398	3.24124	3.24577	3.28205
3.41667	1.2479	1.26276	1.26658	1.50377	1.52941	1.46374	2.16096	2.11526	1.95647	2.72513	2.58293	2.60819	3.1313	3.13029	3.0842	3.23769	3.24517	3.27889
3.42	1.25248	1.26136	1.26992	1.50738	1.5292	1.46485	2.15898	2.11384	1.95609	2.72536	2.58208	2.60756	3.12634	3.13221	3.08278	3.24041	3.24843	3.28365
3.42333	1.24627	1.25893	1.26622	1.50341	1.52817	1.46387	2.15991	2.11273	1.9563	2.72248	2.58763	2.61114	3.12257	3.12842	3.0868	3.24388	3.24948	3.28388
3.42667	1.25125	1.26116	1.27184	1.50612	1.52649	1.4657	2.159	2.11355	1.95481	2.7271	2.59071	2.60921	3.13029	3.12651	3.08387	3.23231	3.24966	3.2781
3.43	1.24985	1.26069	1.26942	1.50884	1.52806	1.46707	2.16306	2.11644	1.95436	2.72635	2.5858	2.60642	3.12378	3.13028	3.08352	3.24124	3.25054	3.27634
3.43333	1.24781	1.26444	1.26754	1.51194	1.5293	1.46396	2.15906	2.11271	1.95561	2.72863	2.58879	2.61282	3.12805	3.12982	3.07994	3.23651	3.24803	3.28144
3.43667	1.25066	1.26431	1.26922	1.50857	1.5248	1.45931	2.16229	2.12289	1.9537	2.72522	2.58546	2.60895	3.12041	3.12973	3.08096	3.23862	3.2506	3.2862
3.44	1.24812	1.26103	1.26652	1.50811	1.52479	1.46413	2.15973	2.11554	1.95357	2.7234	2.58223	2.61006	3.12295	3.13063	3.08526	3.23864	3.24548	3.28297
3.44333	1.2518	1.26113	1.268	1.51206	1.52831	1.46375	2.1573	2.11122	1.9585	2.72752	2.58182	2.60759	3.1254	3.1259	3.08393	3.24111	3.24624	3.28217
3.44667	1.25189	1.26371	1.26649	1.50435	1.52619	1.46665	2.15911	2.1187	1.95579	2.72852	2.58832	2.60718	3.12649	3.12562	3.0801	3.241	3.24866	3.27912
3.45	1.24888	1.26689	1.26987	1.51135	1.52754	1.46632	2.15916	2.11725	1.95714	2.72616	2.58068	2.61169	3.1238	3.13018	3.08431	3.23697	3.25224	3.28133
3.45333	1.25105	1.26067	1.26566	1.50501	1.53507	1.46979	2.1599	2.10935	1.9544	2.71269	2.58793	2.60651	3.12711	3.1298	3.08149	3.23609	3.24731	3.27854
3.45667	1.24303	1.26369	1.26883	1.50411	1.52934	1.46653	2.15883	2.11684	1.95747	2.7227	2.58891	2.60759	3.12444	3.12587	3.07944	3.23659	3.24682	3.27948
3.46	1.25108	1.26169	1.26461	1.50898	1.53223	1.46201	2.15584	2.11464	1.95621	2.72167	2.59016	2.61268	3.12513	3.12723	3.08417	3.23831	3.24798	3.28246
3.46333	1.2555	1.26442	1.26883	1.50517	1.52894	1.46387	2.16244	2.11034	1.95867	2.72188	2.5839	2.61232	3.12006	3.12761	3.07795	3.23525	3.24705	3.27765
3.46667	1.24514	1.2567	1.26587	1.50641	1.53347	1.469	2.16163	2.11503	1.95856	2.72051	2.58849	2.60915	3.123	3.13229	3.08244	3.23882	3.24741	3.28186
3.47	1.25591	1.26245	1.27327	1.50509	1.5272	1.46879	2.15317	2.11814	1.95853	2.72738	2.58679	2.61237	3.12896	3.12965	3.07848	3.23864	3.24569	3.27819
3.47333	1.25137	1.26595	1.26888	1.50733	1.53506	1.46586	2.15519	2.10797	1.95977	2.72334	2.58499	2.60451	3.12445	3.13006	3.08127	3.24033	3.24504	3.28124
3.47667	1.2518	1.26769	1.26632	1.50217	1.53096	1.46811	2.16065	2.11147	1.95598	2.72261	2.5837	2.61197	3.12122	3.12524	3.07834	3.23189	3.24631	3.27803
3.48	1.25446	1.26111	1.27039	1.50917	1.52768	1.46494	2.16799	2.11781	1.95791	2.72442	2.58869	2.60499	3.12118	3.12744	3.08696	3.23278	3.24796	3.28207
3.48333	1.25334	1.26531	1.27503	1.50708	1.53379	1.46652	2.16229	2.1129	1.95715	2.72374	2.58813	2.60693	3.12234	3.12684	3.07563	3.23783	3.24615	3.28581
3.48667	1.25517	1.26693	1.27067	1.50957	1.52965	1.4664	2.15616	2.11382	1.95804	2.72304	2.58457	2.60471	3.12192	3.12276	3.07922	3.2273	3.24226	3.27361
3.49	1.25036	1.2643	1.27134	1.50458	1.52978	1.46711	2.15869	2.11492	1.95526	2.72253	2.58505	2.60882	3.12202	3.12582	3.08092	3.23152	3.24266	3.28018
3.49333	1.25183	1.26316	1.27148	1.50723	1.53115	1.4651	2.1611	2.10969	1.95777	2.72915	2.58975	2.60704	3.12213	3.1245	3.08379	3.23642	3.24256	3.27899
3.49667	1.25091	1.27287	1.26543	1.50259	1.53328	1.46681	2.15709	2.11084	1.95583	2.72758	2.58381	2.60911	3.11592	3.12413	3.08035	3.23718	3.24558	3.27589
3.5	1.25164	1.26832	1.27344	1.50505	1.53008	1.4656	2.15762	2.11613	1.95408	2.72297	2.5837	2.61159	3.12274	3.12662	3.07899	3.23397	3.24667	3.2765
3.50333	1.25352	1.26361	1.27183	1.50771	1.53687	1.46291	2.15419	2.12096	1.95797	2.72097	2.58751	2.60561	3.124	3.12144	3.08167	3.2322	3.24334	3.27771
3.50667	1.24888	1.26563	1.27387	1.5111	1.53462	1.4636	2.15885	2.11817	1.95573	2.72464	2.58831	2.6116	3.12071	3.12466	3.08127	3.23116	3.24161	3.2721
3.51	1.25086	1.26661	1.27443	1.50764	1.53167	1.46521	2.15561	2.11614	1.95902	2.72362	2.58497	2.6139	3.11856	3.12546	3.07837	3.22798	3.24188	3.27386
3.51333	1.25152	1.26652	1.274	1.50135	1.53332	1.4698	2.15959	2.11924	1.95545	2.7325	2.58627	2.60405	3.12373	3.11881	3.08171	3.23538	3.24157	3.27651
3.51667	1.2513	1.26672	1.26966	1.50824	1.53241	1.46654	2.15952	2.1153	1.9571	2.72119	2.5819	2.61244	3.12214	3.12502	3.07928	3.23707	3.24372	3.28212
3.52	1.25316	1.27011	1.27161	1.50678	1.53756	1.46694	2.1552	2.1173	1.96053	2.72393	2.58803	2.60716	3.12196	3.12448	3.0775	3.2328	3.24183	3.27335
3.52333	1.24987	1.27057	1.27331	1.50595	1.53497	1.47004	2.15683	2.11447	1.9551	2.72549	2.58697	2.60927	3.12225	3.12527	3.08025	3.23336	3.24601	3.27607
3.52667	1.25262	1.27038	1.27445	1.50973	1.53487	1.46974	2.15591	2.11136	1.9633	2.72042	2.58794	2.61013	3.1228	3.12585	3.07799	3.23378	3.24588	3.27471
3.53	1.24991	1.27223	1.27733	1.50457	1.53407	1.46569	2.16115	2.11605	1.95663	2.72679	2.58594	2.60841	3.12093	3.12948	3.07735	3.23073	3.23948	3.27576
3.53333	1.25227	1.26854	1.27741	1.50705	1.52867	1.46245	2.15613	2.11406	1.95998	2.72324	2.58934	2.6106	3.11574	3.12297	3.08215	3.22608	3.25068	3.27588
3.53667	1.25307	1.26629	1.27762	1.5062	1.52479	1.46756	2.15683	2.11388	1.96271	2.72365	2.58446	2.60837	3.11644	3.12379	3.0812	3.23315	3.24361	3.27649
3.54	1.2524	1.27099	1.2786	1.50483	1.53448	1.47152	2.15561	2.11729	1.9602	2.72249	2.5851	2.607	3.11902	3.1302	3.08018	3.22727	3.24478	3.27214
3.54333	1.25189	1.27018	1.27615	1.50418	1.53768	1.47388	2.15784	2.11722	1.95524	2.72444	2.59	2.60914	3.12353	3.12653	3.0774	3.22837	3.24314	3.27085
3.54667	1.25702	1.26795	1.27597	1.50606	1.53423	1.47127	2.15643	2.11752	1.96004	2.72264	2.58303	2.61097	3.11777	3.11904	3.07925	3.23353	3.24636	3.27545
3.55	1.25329	1.26883	1.27236	1.50333	1.53814	1.46665	2.15685	2.11479	1.95689	2.72388	2.58879	2.6064	3.11816	3.12356	3.0711	3.23414	3.23592	3.27579
3.55333	1.25323	1.27113	1.27343	1.5063	1.53357	1.47254	2.15543	2.11959	1.95483	2.72222	2.58707	2.60054	3.12059	3.12373	3.07831	3.22854	3.24051	3.27278
3.55667	1.253	1.26852	1.27688	1.50338	1.53421	1.46959	2.15243	2.11584	1.95939	2.71829	2.58643	2.60726	3.11782	3.12187	3.07452	3.23195	3.23839	3.27328
3.56	1.25126	1.27068	1.2748	1.50324	1.53615	1.46803	2.15855	2.11764	1.95834	2.72128	2.58747	2.60723	3.11668	3.12601	3.0773	3.23152	3.24229	3.27086
3.56333	1.25174	1.26869	1.27562	1.50794	1.53422	1.46973	2.16131	2.11806	1.95371	2.72038	2.58598	2.6136	3.11976	3.1257	3.07601	3.23104	3.2404	3.27176
3.56667	1.25562	1.27115	1.28129	1.50831	1.53207	1.46939	2.15919	2.11439	1.95716	2.71989	2.58914	2.60911	3.11994	3.12087	3.07695	3.23033	3.23594	3.27242
3.57	1.25109	1.27069	1.27585	1.50499	1.53391	1.47233	2.15344	2.11207	1.95704	2.71965	2.58696	2.60358	3.1182	3.11895	3.07853	3.22719	3.24059	3.27391
3.57333	1.25214	1.27202	1.2774	1.50498	1.53804	1.46789	2.16145	2.1164	1.962	2.72061	2.58532	2.61488	3.11859	3.12711	3.07645	3.22903	3.24291	3.27421
3.57667	1.25253	1.27132	1.27715	1.50337	1.53247	1.4737	2.16023	2.11632	1.96035	2.729	2.59028	2.60798	3.12087	3.11867	3.07987	3.22965	3.23785	3.26888
3.58	1.25943	1.27621	1.27577	1.50359	1.53637	1.47641	2.1551	2.11651	1.95638	2.72258	2.58699	2.60868	3.11896	3.12111	3.08015	3.23058	3.23861	3.27099
3.58333	1.25023	1.2722	1.27411	1.50729	1.53543	1.46917	2.15765	2.11391	1.95784	2.72048	2.58757	2.60912	3.11907	3.12299	3.07707	3.22521	3.24042	3.27209
3.58667	1.25592	1.27378	1.27329	1.50067	1.53518	1.47061	2.15983	2.11601	1.95978	2.7216	2.59036	2.61106	3.11711	3.12223	3.07641	3.22471	3.2395	3.2763
3.59	1.25423	1.27336	1.28062	1.50709	1.53756	1.47056	2.15797	2.11504	1.95567	2.72517	2.581	2.6068	3.11511	3.12034	3.07498	3.23054	3.24448	3.26945
3.59333	1.25613	1.27025	1.28339	1.50213	1.53664	1.47078	2.15541	2.11425	1.96311	2.72212	2.58579	2.61158	3.11894	3.12225	3.07833	3.23049	3.23674	3.27313
3.59667	1.2543	1.27371	1.27829	1.50509	1.53239	1.46938	2.1592	2.11549	1.95597	2.72183	2.58498	2.61173	3.11585	3.12076	3.07655	3.2301	3.23562	3.26842
3.6	1.25341	1.27455	1.28016	1.50592	1.5419	1.47301	2.16289	2.11251	1.95947	2.7229	2.58655	2.60736	3.11558	3.12069	3.0752	3.22762	3.23835	3.27516
3.60333	1.25501	1.27425	1.27772	1.50798	1.53795	1.47205	2.15588	2.11781	1.95275	2.72277	2.58872	2.60973	3.11915	3.1149	3.06687	3.22963	3.23879	3.26698
3.60667	1.25127	1.27425	1.27867	1.51056	1.53989	1.47041	2.15609	2.115	1.95802	2.72604	2.58412	2.61438	3.11604	3.11956	3.07673	3.22333	3.23698	3.26659
3.61	1.25394	1.27582	1.28025	1.50162	1.54182	1.4702	2.15424	2.11802	1.95979	2.72269	2.5844	2.61063	3.11552	3.11185	3.07287	3.22184	3.23366	3.26785
3.61333	1.25518	1.27566	1.2761	1.499	1.53636	1.47232	2.1579	2.11594	1.95898	2.72358	2.58612	2.61148	3.1193	3.11875	3.0781	3.22532	3.23696	3.26923
3.61667	1.25443	1.27104	1.28437	1.50724	1.53935	1.47387	2.15799	2.11697	1.95734	2.72317	2.58683	2.60939	3.11536	3.11862	3.07254	3.2263	3.24084	3.27377
3.62	1.25065	1.2733	1.27842	1.50353	1.54001	1.47333	2.15769	2.11896	1.96252	2.72348	2.58587	2.6093	3.11843	3.11991	3.07393	3.22421	3.23519	3.27016
3.62333	1.25483	1.2764	1.28033	1.50087	1.54008	1.47195	2.15381	2.11688	1.9635	2.72211	2.5905	2.60423	3.11591	3.11981	3.07496	3.22043	3.23327	3.26903
3.62667	1.25616	1.2734	1.28211	1.50608	1.54323	1.47132	2.15476	2.11716	1.95913	2.72024	2.58224	2.60658	3.1164	3.11866	3.07495	3.22467	3.23677	3.26972
3.63	1.25563	1.2787	1.28369	1.50648	1.54139	1.47212	2.15257	2.11803	1.9611	2.72257	2.58932	2.61242	3.1087	3.12038	3.07392	3.22535	3.2402	3.26385
3.63333	1.24913	1.27628	1.2752	1.50398	1.54086	1.47289	2.15838	2.11889	1.95889	2.72147	2.58704	2.60069	3.11376	3.11966	3.07453	3.23066	3.23681	3.2715
3.63667	1.25491	1.27547	1.28288	1.50497	1.5378	1.47263	2.15884	2.11724	1.95941	2.72298	2.5896	2.60557	3.11743	3.11806	3.0696	3.22147	3.23918	3.26787
3.64	1.25478	1.27558	1.27618	1.50565	1.54081	1.4728	2.15545	2.12126	1.95955	2.72394	2.58654	2.60428	3.11279	3.11944	3.07657	3.22388	3.23249	3.26999
3.64333	1.25527	1.27622	1.27363	1.50277	1.5435	1.46932	2.15652	2.11801	1.95985	2.72256	2.58734	2.60649	3.11273	3.11617	3.07026	3.22302	3.23899	3.26979
3.64667	1.25405	1.27631	1.27599	1.50738	1.54253	1.47076	2.15637	2.11768	1.96346	2.7185	2.58763	2.60653	3.11662	3.12075	3.07492	3.21597	3.23291	3.26883
3.65	1.25492	1.27958	1.28077	1.51052	1.53628	1.46894	2.15675	2.11872	1.95944	2.72218	2.58601	2.61128	3.10886	3.11928	3.07203	3.22994	3.23631	3.27047
3.65333	1.25279	1.27827	1.28179	1.50111	1.54184	1.47246	2.15569	2.11374	1.9623	2.7189	2.58346	2.60935	3.1153	3.11516	3.07176	3.22276	3.23396	3.2643
3.65667	1.25626	1.27414	1.28317	1.50483	1.53854	1.47002	2.15518	2.11995	1.95827	2.71543	2.58645	2.60936	3.11151	3.11456	3.07331	3.22441	3.23328	3.26749
3.66	1.25751	1.27523	1.28545	1.50143	1.54431	1.47516	2.1553	2.12087	1.96249	2.72521	2.58942	2.6094	3.11271	3.11713	3.06764	3.2209	3.23579	3.2664
3.66333	1.25072	1.27774	1.28178	1.5037	1.54019	1.47092	2.15676	2.11905	1.95607	2.71946	2.58071	2.60682	3.11752	3.11445	3.07475	3.22383	3.23429	3.26514
3.66667	1.25455	1.27477	1.2811	1.50384	1.53488	1.46866	2.15879	2.11736	1.96073	2.72107	2.58539	2.60901	3.10937	3.11558	3.0761	3.2269	3.23654	3.2695
3.67	1.26082	1.28563	1.2808	1.50124	1.54176	1.47586	2.15753	2.1173	1.95904	2.72922	2.5882	2.60449	3.1126	3.11936	3.0715	3.22182	3.22806	3.2671
3.67333	1.25192	1.27948	1.28364	1.50244	1.54527	1.47376	2.15665	2.11794	1.96066	2.72089	2.58417	2.60443	3.11193	3.11393	3.06935	3.22103	3.23226	3.26571
3.67667	1.25206	1.27392	1.28493	1.49994	1.54156	1.47167	2.15668	2.11873	1.96296	2.72179	2.58291	2.60599	3.11326	3.11398	3.07342	3.2179	3.23416	3.26811
3.68	1.2563	1.27492	1.28157	1.50166	1.54532	1.47076	2.15598	2.11309	1.95863	2.72403	2.58338	2.61452	3.11188	3.11727	3.0718	3.22278	3.23488	3.26864
3.68333	1.24881	1.27662	1.2858	1.50592	1.54565	1.47351	2.15555	2.1144	1.95709	2.72366	2.58544	2.61203	3.11437	3.11699	3.0705	3.22428	3.23517	3.26433
3.68667	1.25771	1.27658	1.27582	1.50181	1.54381	1.47223	2.15495	2.11939	1.95694	2.72059	2.58535	2.60467	3.11444	3.11595	3.06849	3.2171	3.23332	3.26551
3.69	1.25367	1.28024	1.28589	1.50224	1.54501	1.47646	2.15312	2.11695	1.95586	2.7235	2.59058	2.60731	3.11256	3.11741	3.07553	3.22131	3.23132	3.26668
3.69333	1.25855	1.28147	1.2848	1.50509	1.54889	1.4762	2.15469	2.1153	1.95961	2.72448	2.58168	2.61187	3.11223	3.11618	3.06983	3.2194	3.23041	3.26515
3.69667	1.2576	1.27315	1.28555	1.50173	1.54248	1.47363	2.14816	2.11626	1.96182	2.72044	2.58261	2.60834	3.11083	3.11893	3.07822	3.22393	3.23154	3.26426
3.7	1.25572	1.28084	1.28569	1.50261	1.54638	1.47204	2.15432	2.11698	1.96232	2.7198	2.58617	2.60427	3.10801	3.1142	3.07241	3.22017	3.22589	3.2681
3.70333	1.25904	1.28166	1.27745	1.50295	1.54452	1.47193	2.15421	2.11865	1.9607	2.71958	2.58266	2.61088	3.10689	3.11853	3.07428	3.21932	3.23296	3.26833
3.70667	1.25517	1.27925	1.28509	1.50635	1.5464	1.47394	2.15664	2.11546	1.95878	2.7248	2.58573	2.61193	3.10903	3.11128	3.07014	3.21624	3.23097	3.26567
3.71	1.25185	1.27857	1.28741	1.50423	1.54656	1.47546	2.15846	2.11272	1.95794	2.72241	2.58917	2.60522	3.10924	3.10728	3.07345	3.21678	3.23005	3.26705
3.71333	1.25795	1.28142	1.28572	1.50673	1.54336	1.47468	2.1515	2.11619	1.96267	2.71983	2.5848	2.61276	3.11258	3.11311	3.07488	3.21738	3.23001	3.2673
3.71667	1.25408	1.28276	1.28503	1.50516	1.54699	1.47508	2.15517	2.11292	1.95809	2.72269	2.58577	2.60892	3.10769	3.11623	3.07114	3.22076	3.23721	3.25792
3.72	1.25567	1.27998	1.28767	1.50031	1.54396	1.476	2.15617	2.12078	1.95721	2.71847	2.5826	2.60176	3.11279	3.1168	3.07	3.22494	3.23176	3.26217
3.72333	1.2548	1.28269	1.28063	1.50271	1.54387	1.47076	2.15075	2.11759	1.96101	2.71609	2.58138	2.60934	3.11202	3.11173	3.06933	3.22482	3.22833	3.2663
3.72667	1.2577	1.28053	1.28635	1.509	1.55003	1.46751	2.15527	2.1189	1.95833	2.72295	2.58505	2.60263	3.11243	3.1156	3.069	3.21866	3.2332	3.2577
3.73	1.25748	1.27917	1.28131	1.50175	1.54812	1.47594	2.15458	2.11539	1.95714	2.7145	2.58694	2.60526	3.11021	3.11112	3.06288	3.21552	3.22795	3.26342
3.73333	1.25418	1.28048	1.28596	1.50658	1.54928	1.47691	2.15291	2.12058	1.96076	2.72024	2.58404	2.606	3.10922	3.10926	3.07237	3.21678	3.23092	3.26657
3.73667	1.25429	1.28287	1.28225	1.50052	1.53916	1.47456	2.15116	2.11808	1.96223	2.71856	2.58656	2.61	3.10318	3.11342	3.06944	3.22464	3.22599	3.26347
3.74	1.25345	1.2797	1.28758	1.5004	1.54731	1.47497	2.14773	2.12075	1.95977	2.71983	2.58376	2.60996	3.10798	3.10967	3.07233	3.21567	3.2325	3.26004
3.74333	1.25813	1.28435	1.28629	1.5024	1.54621	1.47664	2.15012	2.11883	1.96187	2.71919	2.58534	2.60761	3.11475	3.11447	3.06168	3.21992	3.23048	3.26067
3.74667	1.25956	1.27958	1.28663	1.4986	1.55104	1.47272	2.15332	2.11926	1.96332	2.72079	2.58571	2.61227	3.11155	3.10985	3.0699	3.21703	3.22383	3.26534
3.75	1.25643	1.28537	1.28635	1.50379	1.54305	1.47264	2.15782	2.1196	1.9635	2.71904	2.5897	2.60699	3.11035	3.11265	3.06688	3.21506	3.2287	3.26156
3.75333	1.25773	1.28004	1.29421	1.50136	1.55013	1.47344	2.15541	2.1197	1.95996	2.7243	2.58684	2.60476	3.11352	3.11171	3.06977	3.22221	3.22771	3.26307
3.75667	1.25395	1.28337	1.2834	1.49955	1.54837	1.4779	2.15285	2.12094	1.96195	2.71818	2.58513	2.6009	3.10939	3.11121	3.07096	3.21693	3.23158	3.25714
3.76	1.25453	1.28437	1.28373	1.50807	1.54507	1.48299	2.15686	2.11729	1.96084	2.71894	2.59031	2.60933	3.11057	3.10853	3.06905	3.2163	3.2287	3.26385
3.76333	1.25947	1.28779	1.28817	1.50293	1.55114	1.48343	2.15486	2.12012	1.95793	2.71558	2.58254	2.60824	3.11373	3.10475	3.0654	3.21975	3.22848	3.26111
3.76667	1.25784	1.28209	1.29119	1.50511	1.54723	1.47563	2.15159	2.11803	1.96084	2.72756	2.58241	2.60823	3.10778	3.11091	3.07054	3.22042	3.22657	3.26497
3.77	1.25798	1.28637	1.28211	1.50649	1.54612	1.47505	2.14936	2.11478	1.95846	2.71814	2.58834	2.60939	3.10594	3.1108	3.06639	3.21479	3.23117	3.25701
3.77333	1.25678	1.27852	1.28967	1.50072	1.54724	1.47931	2.14862	2.12117	1.96139	2.71496	2.58734	2.60419	3.10511	3.11138	3.07007	3.21981	3.22944	3.25903
3.77667	1.26192	1.28146	1.29138	1.49955	1.55149	1.47831	2.1552	2.12173	1.96294	2.72282	2.58836	2.60807	3.10535	3.11588	3.06584	3.21045	3.22505	3.26458
3.78	1.25662	1.28141	1.2871	1.49885	1.54805	1.47687	2.15462	2.12031	1.96412	2.72066	2.58453	2.60453	3.10192	3.10733	3.06761	3.21622	3.22999	3.25495
3.78333	1.25894	1.28801	1.28742	1.50618	1.54647	1.4797	2.15239	2.11745	1.95766	2.71941	2.58592	2.61183	3.1079	3.11105	3.06744	3.21742	3.2279	3.25983
3.78667	1.25998	1.28951	1.28511	1.50402	1.54827	1.47375	2.1517	2.11907	1.95779	2.71643	2.58047	2.60549	3.10035	3.1123	3.06727	3.21348	3.22835	3.26615
3.79	1.25532	1.28089	1.2847	1.50111	1.54827	1.48084	2.15138	2.11883	1.96602	2.7193	2.58424	2.60573	3.10651	3.10752	3.0657	3.20881	3.22716	3.26121
3.79333	1.25898	1.2849	1.29051	1.50114	1.54576	1.47792	2.14893	2.1194	1.9606	2.72284	2.58506	2.60261	3.10509	3.11377	3.06862	3.21631	3.22519	3.25879
3.79667	1.25617	1.28154	1.28824	1.5028	1.54932	1.47955	2.14925	2.12018	1.96121	2.71354	2.58578	2.60676	3.10095	3.10799	3.06317	3.2133	3.22999	3.26032
3.8	1.25823	1.28774	1.28512	1.50449	1.55283	1.47747	2.16018	2.11741	1.96058	2.72036	2.58426	2.60916	3.10784	3.10584	3.0698	3.21488	3.22598	3.25924
3.80333	1.25749	1.2815	1.29012	1.50435	1.55175	1.47576	2.15697	2.11699	1.95822	2.71621	2.58363	2.61141	3.10648	3.11182	3.06999	3.21025	3.22206	3.25568
3.80667	1.26249	1.29013	1.2894	1.50007	1.54932	1.47526	2.14894	2.11955	1.9582	2.71705	2.58273	2.60695	3.10423	3.1096	3.06709	3.21596	3.22487	3.26131
3.81	1.25506	1.28388	1.28642	1.50192	1.5501	1.47932	2.15339	2.12168	1.96081	2.72108	2.58164	2.6023	3.10233	3.10652	3.0664	3.21197	3.22175	3.25874
3.81333	1.25114	1.28956	1.2875	1.5009	1.55147	1.47771	2.15372	2.11868	1.96278	2.71877	2.58437	2.60552	3.10054	3.11484	3.06572	3.21404	3.22338	3.25714
3.81667	1.25347	1.28854	1.28599	1.50257	1.5527	1.47544	2.15617	2.11964	1.95819	2.71654	2.58412	2.60754	3.10551	3.10665	3.06362	3.21144	3.2288	3.25501
3.82	1.25843	1.28508	1.29128	1.5001	1.55201	1.47809	2.15315	2.12177	1.961	2.71548	2.5808	2.60475	3.10164	3.107	3.06317	3.21571	3.22083	3.25803
3.82333	1.26099	1.28079	1.29258	1.49834	1.55231	1.47962	2.14731	2.11936	1.95816	2.7187	2.58759	2.60247	3.10724	3.10314	3.06391	3.21101	3.22247	3.25734
3.82667	1.26022	1.28478	1.29209	1.50091	1.54859	1.47879	2.15146	2.11992	1.9616	2.71956	2.5883	2.60343	3.1057	3.11059	3.06819	3.20643	3.22271	3.25981
3.83	1.25478	1.2842	1.29061	1.50316	1.54827	1.48272	2.15328	2.12	1.96186	2.71294	2.59049	2.6056	3.10197	3.10683	3.06696	3.21037	3.22311	3.25521
3.83333	1.2649	1.29116	1.29311	1.5026	1.55062	1.48078	2.1592	2.11972	1.96178	2.71345	2.58499	2.60926	3.09798	3.1048	3.06448	3.20992	3.22275	3.25862
3.83667	1.25825	1.28268	1.29638	1.50183	1.54772	1.47985	2.15395	2.11994	1.96269	2.71506	2.58044	2.60733	3.10202	3.10882	3.06867	3.2128	3.22149	3.25804
3.84	1.26069	1.28591	1.29086	1.50187	1.55224	1.47757	2.15231	2.11752	1.9644	2.71817	2.5848	2.60507	3.10075	3.1012	3.06556	3.21115	3.21808	3.25266
3.84333	1.25641	1.28539	1.29208	1.4991	1.55178	1.47933	2.15086	2.12102	1.96194	2.7175	2.58411	2.60548	3.11122	3.1046	3.05904	3.20976	3.22054	3.2496
3.84667	1.25886	1.28874	1.29074	1.50132	1.55027	1.48286	2.15197	2.12066	1.96238	2.71721	2.58302	2.607	3.1066	3.10782	3.06375	3.21347	3.22427	3.25784
3.85	1.259	1.28542	1.2916	1.50069	1.5523	1.47717	2.1514	2.11971	1.95919	2.71372	2.58508	2.60208	3.09704	3.10725	3.06331	3.21072	3.22387	3.25934
3.85333	1.25674	1.29235	1.2917	1.49639	1.55215	1.48177	2.14867	2.12054	1.96331	2.71364	2.58161	2.6105	3.10595	3.11019	3.06582	3.20655	3.21972	3.25459
3.85667	1.26115	1.28841	1.29191	1.49852	1.55754	1.48281	2.14758	2.12131	1.95788	2.71736	2.59001	2.61168	3.1068	3.10515	3.06708	3.21221	3.22621	3.25547
3.86	1.26168	1.28839	1.29008	1.49932	1.55207	1.47627	2.15459	2.1198	1.96008	2.71214	2.58507	2.61007	3.09875	3.10898	3.06978	3.21177	3.22485	3.25679
3.86333	1.25941	1.28793	1.29084	1.50061	1.54861	1.47619	2.15146	2.11257	1.95947	2.71467	2.58308	2.6095	3.10689	3.10726	3.06194	3.21356	3.21662	3.25351
3.86667	1.26167	1.28617	1.2902	1.50275	1.55366	1.48134	2.14257	2.12412	1.96208	2.71567	2.5844	2.60368	3.10005	3.10283	3.06265	3.20576	3.22189	3.25883
3.87	1.26016	1.29113	1.29105	1.50443	1.55755	1.47986	2.15184	2.11883	1.9609	2.71857	2.57655	2.60517	3.09784	3.10406	3.062	3.21124	3.22642	3.25237
3.87333	1.25642	1.28666	1.28692	1.49958	1.55251	1.4834	2.15066	2.11739	1.96095	2.71208	2.58798	2.60676	3.09959	3.10155	3.06566	3.20779	3.22017	3.25303
3.87667	1.2617	1.2901	1.29683	1.49677	1.5568	1.48101	2.15104	2.1171	1.96145	2.71581	2.58063	2.60726	3.09782	3.09995	3.05865	3.20445	3.21878	3.25318
3.88	1.25769	1.28758	1.29304	1.50351	1.54801	1.48209	2.15023	2.11685	1.96269	2.71616	2.58491	2.60789	3.10595	3.10293	3.06668	3.20976	3.22067	3.25577
3.88333	1.26256	1.2887	1.29109	1.50373	1.55512	1.48004	2.15542	2.11923	1.9665	2.71734	2.58296	2.61116	3.10058	3.10576	3.06144	3.2049	3.22144	3.2551
3.88667	1.25604	1.28828	1.29329	1.49965	1.5529	1.48256	2.15017	2.11977	1.96004	2.71843	2.5827	2.61218	3.09891	3.1044	3.06139	3.20691	3.2201	3.25064
3.89	1.26107	1.29101	1.29632	1.50754	1.55515	1.47778	2.14866	2.11921	1.96449	2.71509	2.58093	2.60465	3.10196	3.10322	3.05867	3.21176	3.21771	3.25626
3.89333	1.25842	1.29082	1.29741	1.50081	1.55553	1.47805	2.14469	2.12299	1.96267	2.71624	2.583	2.60514	3.10516	3.09913	3.05683	3.20687	3.21495	3.25633
3.89667	1.25765	1.29075	1.29569	1.49929	1.55306	1.47928	2.14626	2.12432	1.9593	2.71632	2.57943	2.60782	3.10047	3.10191	3.06099	3.20717	3.2209	3.24912
3.9	1.25941	1.29035	1.29101	1.50141	1.55568	1.48115	2.15029	2.12053	1.95755	2.71555	2.58489	2.60725	3.10553	3.10667	3.05953	3.20965	3.21515	3.25418
3.90333	1.25899	1.28799	1.29166	1.50381	1.55758	1.48212	2.15155	2.12116	1.9629	2.72257	2.58536	2.61165	3.10146	3.10484	3.06278	3.20332	3.22248	3.25513
3.90667	1.2596	1.29148	1.29938	1.49735	1.55864	1.48426	2.15118	2.11959	1.96433	2.71326	2.58043	2.60376	3.10143	3.10221	3.05618	3.20671	3.21966	3.24657
3.91	1.25771	1.29159	1.29938	1.49877	1.55234	1.47904	2.15028	2.1192	1.9643	2.71932	2.58107	2.60318	3.09705	3.09927	3.05895	3.20621	3.21839	3.25425
3.91333	1.26212	1.29154	1.29623	1.49987	1.55669	1.47995	2.14677	2.11816	1.95843	2.71753	2.58316	2.61018	3.10094	3.10232	3.06168	3.20643	3.21755	3.25622
3.91667	1.26011	1.28847	1.29834	1.50139	1.55954	1.4818	2.14995	2.12069	1.9634	2.71073	2.57992	2.60885	3.09978	3.1071	3.0618	3.20628	3.21348	3.24908
3.92	1.25812	1.29118	1.28969	1.5006	1.54851	1.48003	2.14771	2.11963	1.96238	2.71088	2.5861	2.60165	3.09923	3.10616	3.06083	3.20244	3.21963	3.25324
3.92333	1.25661	1.28959	1.29442	1.49794	1.55791	1.4783	2.15137	2.12102	1.96404	2.71221	2.5865	2.60546	3.09784	3.10183	3.06545	3.20835	3.21401	3.25141
3.92667	1.25561	1.29462	1.2957	1.50038	1.56244	1.48196	2.15604	2.12197	1.9563	2.71608	2.57959	2.6099	3.09846	3.10158	3.06029	3.20485	3.2121	3.25326
3.93	1.25806	1.29193	1.29239	1.49659	1.55948	1.47862	2.14877	2.11568	1.96216	2.71668	2.58092	2.59998	3.09468	3.10099	3.06059	3.20163	3.21376	3.24834
3.93333	1.26278	1.28922	1.29519	1.50031	1.54751	1.48147	2.15105	2.11964	1.96079	2.71726	2.58618	2.60903	3.10177	3.10288	3.05995	3.20495	3.21777	3.25233
3.93667	1.25497	1.29018	1.29788	1.49655	1.55662	1.48138	2.15001	2.11941	1.95851	2.71603	2.58557	2.60646	3.10415	3.10124	3.06167	3.20556	3.21566	3.25185
3.94	1.26158	1.29228	1.29287	1.50157	1.55292	1.48193	2.14674	2.11922	1.96567	2.71225	2.58596	2.60901	3.09706	3.106	3.05555	3.20318	3.21794	3.25026
3.94333	1.26272	1.29544	1.29811	1.50415	1.55765	1.48312	2.14937	2.11856	1.95688	2.7155	2.58219	2.60182	3.09885	3.10586	3.05967	3.20992	3.21517	3.25243
3.94667	1.25953	1.29647	1.29734	1.504	1.56169	1.48559	2.14995	2.12142	1.96295	2.71496	2.58657	2.60625	3.09074	3.0988	3.06124	3.20821	3.21896	3.24841
3.95	1.26191	1.29147	1.30337	1.49802	1.55538	1.48057	2.15026	2.12047	1.95843	2.71591	2.58113	2.60041	3.09707	3.09845	3.0573	3.20534	3.2178	3.25125
3.95333	1.26497	1.29365	1.30027	1.49582	1.55556	1.48187	2.14715	2.11557	1.96398	2.71067	2.58077	2.60778	3.09793	3.10254	3.05674	3.20755	3.22239	3.24565
3.95667	1.25937	1.29111	1.29774	1.49697	1.55812	1.48287	2.14833	2.11156	1.95917	2.71389	2.59038	2.60745	3.09783	3.1001	3.06119	3.20733	3.21687	3.24532
3.96	1.25771	1.29516	1.29904	1.50096	1.55786	1.48251	2.14404	2.12031	1.95771	2.71685	2.58254	2.60827	3.09989	3.10211	3.05722	3.19806	3.21353	3.24954
3.96333	1.25816	1.29534	1.30306	1.49801	1.55672	1.48437	2.15512	2.11865	1.96021	2.71734	2.58102	2.60119	3.09616	3.10223	3.05958	3.20138	3.21318	3.25333
3.96667	1.26129	1.29525	1.29696	1.50196	1.56042	1.48096	2.15173	2.12028	1.9627	2.71351	2.57418	2.60895	3.09823	3.09802	3.05814	3.20664	3.21137	3.24951
3.97	1.26081	1.29007	1.29898	1.4963	1.55787	1.47948	2.14675	2.11683	1.96331	2.71953	2.58526	2.6053	3.09369	3.09403	3.05913	3.20141	3.21851	3.24761
3.97333	1.25922	1.2931	1.30375	1.49801	1.55852	1.48263	2.14915	2.12591	1.96442	2.70898	2.58366	2.60535	3.09307	3.10014	3.05969	3.20509	3.21721	3.24875
3.97667	1.26118	1.29524	1.29798	1.50108	1.56004	1.48801	2.14693	2.11737	1.95837	2.71385	2.57624	2.60551	3.09396	3.10101	3.05783	3.20413	3.21444	3.24687
3.98	1.26229	1.29915	1.29537	1.49973	1.55946	1.4855	2.1506	2.11527	1.95822	2.71736	2.58452	2.60284	3.09438	3.10041	3.05781	3.20757	3.21322	3.25027
3.98333	1.26047	1.29672	1.30135	1.4977	1.55898	1.48285	2.14964	2.12171	1.96137	2.71471	2.58156	2.60107	3.09307	3.09746	3.05791	3.20398	3.21529	3.25091
3.98667	1.25867	1.29608	1.29851	1.49611	1.55859	1.48502	2.14791	2.12395	1.9638	2.71679	2.58553	2.60792	3.09695	3.10021	3.05675	3.20261	3.2183	3.24564
3.99	1.26275	1.29405	1.30093	1.4984	1.5635	1.48361	2.1453	2.11911	1.96456	2.71553	2.58342	2.60767	3.08969	3.09769	3.05615	3.20189	3.21598	3.24953
3.99333	1.26561	1.29539	1.30253	1.49866	1.55934	1.48083	2.14348	2.12313	1.96143	2.71181	2.58177	2.60402	3.09511	3.09784	3.05915	3.20073	3.21154	3.25097
3.99667	1.26216	1.29684	1.30034	1.49952	1.55818	1.48138	2.1452	2.11964	1.96044	2.71358	2.58642	2.6055	3.09269	3.09699	3.06343	3.20457	3.21595	3.24458
4	1.26378	1.29714	1.29776	1.50224	1.55919	1.47986	2.14913	2.11794	1.95964	2.71297	2.58361	2.60997	3.09097	3.09231	3.0559	3.20097	3.21286	3.24446
4.00333	1.26182	1.29846	1.3015	1.49433	1.56061	1.48446	2.1443	2.11691	1.95824	2.70792	2.58562	2.60578	3.09391	3.09915	3.05963	3.20499	3.20715	3.24749
4.00667	1.26142	1.29386	1.29328	1.49696	1.55909	1.48714	2.14379	2.11874	1.96344	2.71977	2.58687	2.60154	3.09022	3.09958	3.0594	3.19942	3.2122	3.24799
4.01	1.26675	1.29299	1.29647	1.50173	1.55836	1.48015	2.15247	2.12276	1.96162	2.71565	2.58236	2.60611	3.09217	3.09477	3.05398	3.20335	3.20494	3.24188
4.01333	1.25704	1.29947	1.29979	1.49614	1.56234	1.48166	2.14877	2.1185	1.95908	2.71307	2.57938	2.6078	3.08537	3.09543	3.05455	3.20299	3.2147	3.24938
4.01667	1.26196	1.2946	1.30019	1.49519	1.55845	1.48453	2.14815	2.11842	1.96018	2.71459	2.58186	2.60578	3.09054	3.09612	3.05675	3.19713	3.21714	3.24979
4.02	1.26335	1.29417	1.29306	1.50033	1.55621	1.48543	2.14914	2.11936	1.96367	2.71742	2.57837	2.61199	3.08808	3.09775	3.05683	3.19732	3.2075	3.24633
4.02333	1.26233	1.29696	1.30184	1.49761	1.56548	1.48877	2.14236	2.11858	1.96136	2.71673	2.57826	2.60277	3.09352	3.0999	3.05103	3.19397	3.21356	3.24896
4.02667	1.26136	1.29487	1.30037	1.49807	1.55706	1.48527	2.14623	2.12466	1.96485	2.71654	2.58165	2.60537	3.09231	3.09781	3.05444	3.20065	3.2121	3.24545
4.03	1.25709	1.30013	1.30321	1.49544	1.56283	1.48576	2.14138	2.11644	1.96077	2.70948	2.57958	2.6034	3.09315	3.09705	3.05386	3.19674	3.2116	3.24473
4.03333	1.26126	1.29738	1.30081	1.49567	1.56085	1.48403	2.14237	2.1184	1.95971	2.71376	2.58529	2.60063	3.08985	3.09125	3.06149	3.19585	3.21283	3.24765
4.03667	1.25962	1.29686	1.30656	1.49968	1.5629	1.4858	2.14712	2.11877	1.95658	2.71318	2.58056	2.60223	3.09179	3.09378	3.05821	3.20324	3.2075	3.24395
4.04	1.26191	1.29919	1.30736	1.5007	1.56096	1.48453	2.14526	2.11678	1.96022	2.72025	2.58289	2.60816	3.0926	3.09611	3.05781	3.20062	3.21018	3.24636
4.04333	1.26373	1.29831	1.3051	1.49633	1.56137	1.47918	2.14831	2.12326	1.95889	2.71575	2.5842	2.60587	3.0873	3.09226	3.05475	3.19579	3.21015	3.24396
4.04667	1.26142	1.2985	1.29738	1.49549	1.5591	1.48658	2.14822	2.12266	1.95802	2.70967	2.58013	2.60281	3.09121	3.09041	3.05245	3.19581	3.21578	3.25195
4.05	1.25636	1.29389	1.30726	1.49778	1.56195	1.48342	2.14989	2.11666	1.96311	2.71304	2.5818	2.60739	3.09054	3.09168	3.05731	3.19786	3.21175	3.24457
4.05333	1.26409	1.2928	1.30169	1.50031	1.56294	1.48573	2.1486	2.1217	1.96342	2.7093	2.57769	2.60032	3.0932	3.09431	3.05236	3.20064	3.20917	3.24213
4.05667	1.26506	1.29777	1.30613	1.49876	1.56192	1.4812	2.14591	2.1229	1.96203	2.71387	2.57707	2.59929	3.08986	3.09419	3.05612	3.19621	3.20483	3.24361
4.06	1.26637	1.29664	1.30856	1.49868	1.56286	1.48006	2.14508	2.1199	1.96059	2.71422	2.5823	2.60352	3.09162	3.09168	3.05014	3.19459	3.20956	3.23912
4.06333	1.26561	1.29572	1.30317	1.49684	1.56352	1.4848	2.14804	2.11691	1.96331	2.71572	2.57417	2.60542	3.08908	3.09472	3.05343	3.19728	3.20853	3.24393
4.06667	1.26212	1.30148	1.30683	1.49644	1.56465	1.48528	2.14541	2.11981	1.9634	2.71457	2.58178	2.60305	3.08835	3.09581	3.05455	3.19906	3.20887	3.24729
4.07	1.26301	1.29966	1.30358	1.49582	1.56458	1.48296	2.14423	2.12142	1.96533	2.71306	2.58511	2.60953	3.09283	3.09773	3.05369	3.19885	3.21244	3.242
4.07333	1.26664	1.29588	1.30474	1.50025	1.55961	1.48397	2.14367	2.11886	1.96215	2.7117	2.58682	2.60851	3.08861	3.08903	3.05129	3.19499	3.20825	3.2416
4.07667	1.25827	1.29959	1.301	1.49616	1.56461	1.49044	2.14605	2.11999	1.96085	2.71345	2.58061	2.59911	3.09165	3.09384	3.05447	3.19749	3.2106	3.23664
4.08	1.2612	1.29661	1.30045	1.49404	1.55967	1.48795	2.14713	2.11621	1.96015	2.71628	2.5757	2.6036	3.08875	3.09389	3.05175	3.19777	3.20955	3.24524
4.08333	1.26205	1.2976	1.3058	1.49386	1.56317	1.48568	2.1481	2.11771	1.96059	2.70638	2.579	2.60466	3.08903	3.09074	3.0588	3.19349	3.20886	3.24608
4.08667	1.2633	1.29901	1.30723	1.49624	1.56364	1.48428	2.1486	2.11747	1.96549	2.7096	2.58101	2.60138	3.08833	3.08478	3.05002	3.19494	3.20904	3.24414
4.09	1.26577	1.29861	1.30276	1.4951	1.56576	1.48684	2.14391	2.1245	1.96018	2.71135	2.58516	2.60787	3.08193	3.09182	3.04961	3.19715	3.20383	3.2422
4.09333	1.26015	1.30068	1.30296	1.49315	1.56734	1.48249	2.14879	2.11816	1.96538	2.71174	2.5808	2.60216	3.09086	3.09625	3.05383	3.19501	3.21068	3.23777
4.09667	1.2657	1.30111	1.30466	1.49717	1.56236	1.48572	2.14731	2.11963	1.96434	2.71093	2.57972	2.60198	3.08512	3.09316	3.04843	3.19628	3.20657	3.23715
4.1	1.2658	1.30306	1.30115	1.4951	1.56438	1.48781	2.14432	2.11928	1.96151	2.71554	2.58305	2.60571	3.09204	3.09584	3.04717	3.19711	3.20952	3.24386
4.10333	1.26318	1.29985	1.30461	1.49816	1.56764	1.48954	2.14119	2.1196	1.96738	2.71152	2.58303	2.60668	3.0864	3.09408	3.05248	3.19314	3.20888	3.23934
4.10667	1.26216	1.30128	1.30095	1.50047	1.56312	1.49094	2.14725	2.11579	1.96548	2.71397	2.58565	2.60863	3.08857	3.09491	3.053	3.19929	3.20702	3.23786
4.11	1.25926	1.29868	1.30922	1.49571	1.56698	1.48199	2.14475	2.1202	1.96012	2.7064	2.57771	2.60249	3.09084	3.08958	3.05065	3.19244	3.20693	3.23503
4.11333	1.25777	1.2995	1.30436	1.49593	1.56217	1.48454	2.14683	2.11687	1.96115	2.7107	2.58207	2.60314	3.08801	3.09164	3.05098	3.19566	3.20227	3.23893
4.11667	1.26162	1.30411	1.3086	1.49461	1.56092	1.48595	2.14382	2.11816	1.96259	2.70789	2.58052	2.60659	3.08503	3.09031	3.04853	3.19628	3.20597	3.23819
4.12	1.26374	1.30275	1.3012	1.49462	1.5614	1.48682	2.14939	2.1214	1.95809	2.71008	2.57724	2.60348	3.08306	3.08964	3.05058	3.19204	3.20589	3.24165
4.12333	1.26414	1.29966	1.30247	1.50014	1.56432	1.49527	2.14714	2.12152	1.96343	2.71008	2.57397	2.59793	3.08646	3.09336	3.05013	3.18908	3.20115	3.23337
4.12667	1.26696	1.30267	1.30365	1.49521	1.56432	1.48552	2.14396	2.11768	1.95666	2.71114	2.57672	2.60377	3.08838	3.09126	3.05301	3.1884	3.20213	3.24021
4.13	1.26579	1.30125	1.30258	1.49134	1.56101	1.48539	2.14404	2.11956	1.96318	2.71069	2.57503	2.59954	3.08605	3.08875	3.04846	3.18951	3.19882	3.23954
4.13333	1.26103	1.30177	1.30883	1.49569	1.56444	1.48388	2.14321	2.12572	1.96074	2.71414	2.57753	2.60205	3.08144	3.08944	3.05216	3.19217	3.2035	3.2383
4.13667	1.26581	1.30307	1.30837	1.49222	1.56628	1.48552	2.1436	2.11939	1.96073	2.71097	2.57624	2.61175	3.09084	3.09296	3.05225	3.1924	3.20324	3.23417
4.14	1.2665	1.30176	1.31205	1.49426	1.56496	1.48557	2.14365	2.12103	1.95968	2.70847	2.57851	2.60255	3.08521	3.09293	3.05218	3.1835	3.20393	3.23861
4.14333	1.26585	1.29757	1.3057	1.49819	1.56874	1.48731	2.13899	2.12485	1.96573	2.70576	2.58126	2.60338	3.08172	3.09433	3.04776	3.19636	3.20779	3.23809
4.14667	1.26566	1.30118	1.30553	1.49526	1.56618	1.48889	2.14298	2.12192	1.95931	2.71186	2.58396	2.60435	3.0867	3.08453	3.04757	3.19011	3.1999	3.23928
4.15	1.26215	1.30271	1.30759	1.49682	1.5715	1.48233	2.14539	2.12083	1.96496	2.70789	2.58033	2.60326	3.08845	3.08313	3.0508	3.19525	3.2055	3.23593
4.15333	1.26126	1.30413	1.30717	1.494	1.56692	1.4868	2.14621	2.12105	1.95901	2.71178	2.58034	2.60208	3.08574	3.08606	3.0543	3.18915	3.20051	3.2413
4.15667	1.2639	1.30211	1.30525	1.49406	1.5667	1.48378	2.14278	2.11712	1.9644	2.7115	2.57369	2.60486	3.08163	3.09094	3.05145	3.18454	3.19736	3.23691
4.16	1.26529	1.30259	1.30919	1.49758	1.56665	1.48803	2.14532	2.11788	1.96659	2.71179	2.57108	2.60009	3.08471	3.08686	3.04899	3.18803	3.20387	3.23551
4.16333	1.26577	1.30173	1.3019	1.49829	1.56864	1.49104	2.14965	2.11695	1.9568	2.70626	2.57853	2.59907	3.08351	3.08926	3.05018	3.19323	3.20686	3.23416
4.16667	1.26599	1.30295	1.30378	1.49752	1.56819	1.49246	2.14563	2.11839	1.96197	2.71241	2.58209	2.60553	3.08329	3.08513	3.0483	3.19128	3.19657	3.2322
4.17	1.25923	1.30242	1.30702	1.49939	1.57202	1.49052	2.14646	2.11881	1.96297	2.70604	2.57505	2.60028	3.0873	3.09068	3.05074	3.19	3.20057	3.23911
4.17333	1.26613	1.30185	1.30704	1.49316	1.56724	1.48804	2.13671	2.12378	1.96413	2.7091	2.57681	2.60683	3.08232	3.08375	3.0489	3.1881	3.20216	3.23245
4.17667	1.2617	1.30359	1.30264	1.49223	1.57113	1.48338	2.14396	2.12218	1.96295	2.70748	2.57798	2.6051	3.08651	3.08756	3.05127	3.18536	3.20053	3.23312
4.18	1.26601	1.30493	1.3088	1.49788	1.56592	1.48646	2.14669	2.12002	1.96061	2.71307	2.57812	2.60116	3.08173	3.0831	3.0499	3.18839	3.1999	3.23933
4.18333	1.26427	1.30357	1.30647	1.49393	1.57014	1.48797	2.14033	2.11949	1.9595	2.70975	2.58056	2.60071	3.08627	3.08846	3.05094	3.18915	3.20458	3.23844
4.18667	1.26598	1.3034	1.3045	1.49459	1.57257	1.48427	2.14272	2.12014	1.96085	2.711	2.58129	2.60071	3.0846	3.08328	3.04604	3.17975	3.20217	3.23264
4.19	1.26019	1.2983	1.30913	1.49676	1.56996	1.48842	2.14101	2.12288	1.95987	2.70673	2.57984	2.5968	3.08208	3.08333	3.04763	3.18835	3.20085	3.23121
4.19333	1.26527	1.30628	1.31064	1.49488	1.56997	1.49219	2.1443	2.1198	1.96416	2.70594	2.58374	2.60236	3.08371	3.08455	3.04512	3.18476	3.20494	3.23677
4.19667	1.26269	1.30688	1.31133	1.49611	1.56485	1.49127	2.14128	2.12233	1.96187	2.71063	2.58336	2.60118	3.08336	3.0843	3.05174	3.18644	3.20352	3.23093
4.2	1.26399	1.30484	1.30679	1.49526	1.56912	1.49015	2.13647	2.12092	1.96406	2.71378	2.57336	2.60366	3.085	3.084	3.04377	3.18344	3.20106	3.23256
4.20333	1.26371	1.30568	1.31045	1.49183	1.56282	1.49357	2.14411	2.12291	1.96551	2.70726	2.58322	2.60014	3.07979	3.08428	3.05141	3.18423	3.202	3.23666
4.20667	1.26671	1.30492	1.31036	1.49478	1.56668	1.48942	2.14471	2.12294	1.96179	2.70497	2.578	2.59886	3.0844	3.08567	3.04702	3.18429	3.20027	3.23246
4.21	1.26169	1.30267	1.31708	1.49663	1.5787	1.48821	2.13859	2.12236	1.96423	2.71023	2.57699	2.59568	3.08284	3.08713	3.04389	3.18567	3.20307	3.24004
4.21333	1.26466	1.30854	1.3086	1.49422	1.57153	1.48772	2.14121	2.12518	1.9621	2.71196	2.58179	2.59959	3.0843	3.08076	3.04299	3.18291	3.19651	3.23278
4.21667	1.26737	1.31048	1.30717	1.49488	1.56769	1.48832	2.1372	2.11922	1.96222	2.70995	2.58194	2.60165	3.08111	3.08882	3.04515	3.18554	3.20032	3.23847
4.22	1.2653	1.30413	1.30578	1.49713	1.57007	1.48516	2.14322	2.12068	1.96106	2.7083	2.57766	2.59799	3.08856	3.08848	3.03989	3.18794	3.20051	3.22959
4.22333	1.26372	1.30506	1.31191	1.48815	1.56805	1.49337	2.14049	2.12081	1.96298	2.70363	2.57813	2.59764	3.08235	3.084	3.04775	3.18638	3.19847	3.23773
4.22667	1.26699	1.30475	1.30582	1.4891	1.57543	1.48678	2.13958	2.12477	1.96339	2.70564	2.58129	2.60153	3.08244	3.08137	3.04787	3.1946	3.20039	3.23425
4.23	1.26551	1.30588	1.31118	1.49559	1.57258	1.49337	2.13878	2.11852	1.96794	2.70799	2.57899	2.60124	3.07583	3.08294	3.04625	3.18262	3.2004	3.2305
4.23333	1.26743	1.30402	1.30779	1.49632	1.57227	1.49199	2.1434	2.11819	1.96155	2.71073	2.57703	2.60186	3.07621	3.08674	3.05156	3.18813	3.19828	3.23325
4.23667	1.27007	1.3051	1.31097	1.49164	1.57078	1.49038	2.13958	2.11985	1.95992	2.71127	2.58259	2.59964	3.07944	3.07944	3.04649	3.18771	3.19646	3.2362
4.24	1.26267	1.30866	1.30527	1.49392	1.57325	1.49157	2.14116	2.12134	1.96076	2.70557	2.58252	2.60341	3.08186	3.08476	3.04693	3.18644	3.19811	3.2297
4.24333	1.26358	1.30693	1.30677	1.48929	1.56484	1.49082	2.14018	2.11949	1.96522	2.70151	2.57883	2.60082	3.07707	3.08552	3.03877	3.18432	3.19471	3.23293
4.24667	1.26177	1.30872	1.31267	1.49187	1.5684	1.48995	2.14306	2.12062	1.96106	2.7101	2.57472	2.59885	3.07983	3.08231	3.0476	3.18251	3.19666	3.2291
4.25	1.26036	1.30482	1.31172	1.49498	1.57583	1.48818	2.13663	2.12141	1.96457	2.71087	2.57447	2.60199	3.07788	3.08718	3.04282	3.18211	3.19839	3.23188
4.25333	1.25859	1.30509	1.30955	1.48783	1.57342	1.49074	2.13942	2.11948	1.96069	2.70584	2.58075	2.60139	3.08046	3.08665	3.04309	3.18	3.19809	3.235
4.25667	1.26517	1.30505	1.31272	1.49255	1.5662	1.49246	2.14371	2.11868	1.9604	2.70664	2.57663	2.60911	3.07341	3.07902	3.04847	3.18462	3.19448	3.23537
4.26	1.26279	1.31263	1.31463	1.49728	1.5728	1.48732	2.13941	2.11638	1.96063	2.71402	2.58113	2.59569	3.08153	3.08255	3.04464	3.18014	3.19951	3.23368
4.26333	1.26788	1.30808	1.30684	1.49204	1.5713	1.49091	2.14719	2.11725	1.96539	2.70499	2.57997	2.59936	3.07826	3.07917	3.04665	3.18039	3.19477	3.22909
4.26667	1.26434	1.30994	1.30935	1.49329	1.57225	1.48839	2.1388	2.11722	1.96226	2.70499	2.57653	2.60676	3.07801	3.07974	3.04543	3.18489	3.19859	3.23322
4.27	1.26784	1.30885	1.31392	1.48985	1.57136	1.49192	2.13918	2.1186	1.9604	2.70872	2.57551	2.59782	3.07913	3.07915	3.0459	3.18041	3.19816	3.23211
4.27333	1.26027	1.31066	1.31296	1.49891	1.57686	1.4913	2.139	2.1172	1.96313	2.7089	2.57733	2.60093	3.07676	3.07861	3.03895	3.1791	3.19828	3.2287
4.27667	1.26516	1.3114	1.31595	1.49245	1.56863	1.49331	2.14481	2.12173	1.96259	2.7091	2.57853	2.59748	3.07822	3.0805	3.04303	3.18285	3.19324	3.23193
4.28	1.26625	1.31645	1.31702	1.49904	1.57494	1.4902	2.13687	2.11949	1.96778	2.70879	2.58168	2.60084	3.06928	3.07606	3.04508	3.1829	3.1958	3.22984
4.28333	1.2635	1.30699	1.31092	1.49321	1.57466	1.48552	2.13932	2.11415	1.96652	2.70283	2.58203	2.60526	3.07781	3.07602	3.04265	3.18366	3.19071	3.22564
4.28667	1.2655	1.30937	1.31017	1.49329	1.56823	1.49654	2.14461	2.11789	1.96171	2.70153	2.58116	2.59523	3.07427	3.08489	3.03977	3.18386	3.20048	3.23125
4.29	1.26085	1.31157	1.3214	1.49385	1.57056	1.49218	2.13695	2.11934	1.96457	2.70595	2.57649	2.59965	3.07774	3.08075	3.0435	3.18509	3.1929	3.22801
4.29333	1.26401	1.30717	1.3141	1.49065	1.5739	1.48744	2.13871	2.11663	1.95848	2.70402	2.57897	2.60227	3.07823	3.07667	3.04109	3.18495	3.19632	3.23063
4.29667	1.26742	1.31103	1.31492	1.49375	1.57074	1.4862	2.14067	2.12389	1.96136	2.70632	2.58149	2.60061	3.07468	3.08327	3.04422	3.17883	3.19398	3.23087
4.3	1.26663	1.31163	1.30946	1.49731	1.57169	1.49283	2.13923	2.11731	1.96477	2.70505	2.57735	2.60086	3.07759	3.07468	3.04258	3.1817	3.1932	3.2337
4.30333	1.26453	1.30769	1.31835	1.48621	1.57036	1.48958	2.13942	2.11944	1.96488	2.7063	2.57359	2.599	3.07853	3.07762	3.04142	3.18266	3.19577	3.22932
4.30667	1.26753	1.31011	1.31663	1.49248	1.57486	1.48929	2.13692	2.11841	1.95843	2.70618	2.57673	2.60207	3.07664	3.07936	3.04584	3.17557	3.19416	3.23016
4.31	1.26554	1.30737	1.31366	1.4962	1.57298	1.4899	2.14065	2.1198	1.96144	2.70609	2.57892	2.60225	3.08102	3.08154	3.03913	3.17785	3.18967	3.22725
4.31333	1.27085	1.31404	1.31115	1.49458	1.57315	1.49293	2.13912	2.11834	1.96394	2.70215	2.57567	2.59764	3.07257	3.07851	3.04245	3.1827	3.19285	3.22682
4.31667	1.26872	1.30674	1.31071	1.48839	1.57701	1.48941	2.13781	2.1225	1.96313	2.7035	2.57584	2.6037	3.07672	3.08085	3.04405	3.18076	3.19707	3.22711
4.32	1.26256	1.30606	1.31665	1.49298	1.57441	1.48933	2.13753	2.11963	1.96527	2.70722	2.58442	2.59397	3.0762	3.07927	3.039	3.18382	3.19007	3.22541
4.32333	1.26778	1.31266	1.31038	1.48922	1.57731	1.49103	2.13497	2.12129	1.95676	2.70241	2.57283	2.60283	3.07987	3.07831	3.03683	3.1784	3.19284	3.22318
4.32667	1.26603	1.31351	1.31689	1.49481	1.5701	1.49568	2.13693	2.12082	1.96225	2.70559	2.57392	2.60371	3.06705	3.08201	3.04233	3.17848	3.19637	3.22573
4.33	1.26331	1.31448	1.3175	1.48886	1.57609	1.49264	2.13773	2.11885	1.96253	2.69897	2.56952	2.60329	3.07468	3.07419	3.04429	3.18135	3.19439	3.22717
4.33333	1.26574	1.3119	1.3146	1.49319	1.5769	1.49771	2.1415	2.11867	1.95985	2.70721	2.57929	2.59386	3.07442	3.0746	3.03948	3.17881	3.18931	3.22533
4.33667	1.26415	1.31337	1.31548	1.48938	1.57428	1.48702	2.13624	2.11924	1.96293	2.70512	2.57602	2.598	3.07706	3.07705	3.03546	3.17674	3.18943	3.22767
4.34	1.26657	1.30855	1.31377	1.49069	1.57607	1.49799	2.13706	2.12136	1.95872	2.7041	2.58241	2.59849	3.07698	3.07486	3.03491	3.17905	3.18768	3.22108
4.34333	1.26551	1.31001	1.31099	1.49695	1.57303	1.49233	2.13491	2.11988	1.96407	2.70703	2.57294	2.59835	3.07683	3.07393	3.03889	3.17501	3.19096	3.22987
4.34667	1.26144	1.31126	1.31556	1.49148	1.578	1.4904	2.14205	2.12118	1.96131	2.69949	2.57286	2.59878	3.07356	3.07801	3.04027	3.1763	3.19222	3.22127
4.35	1.27009	1.31001	1.31784	1.49068	1.57455	1.49274	2.14	2.12284	1.96407	2.70627	2.57978	2.59621	3.07223	3.07199	3.03953	3.17642	3.1913	3.22668
4.35333	1.26912	1.31152	1.31764	1.49574	1.57735	1.49446	2.13722	2.11766	1.96189	2.70799	2.57314	2.60159	3.07334	3.07799	3.03945	3.1753	3.18838	3.22126
4.35667	1.26615	1.31353	1.31996	1.49244	1.57768	1.49185	2.1401	2.11984	1.9589	2.69873	2.57964	2.59703	3.07335	3.07549	3.03997	3.18381	3.19206	3.22292
4.36	1.26827	1.31151	1.311	1.48982	1.57333	1.49319	2.13651	2.12242	1.96503	2.70506	2.57808	2.59632	3.07269	3.07851	3.03981	3.17957	3.19131	3.22705
4.36333	1.26347	1.31245	1.31756	1.49221	1.57779	1.48769	2.13876	2.11941	1.96045	2.7095	2.57964	2.59907	3.06902	3.07763	3.03799	3.17944	3.18838	3.22856
4.36667	1.26057	1.30884	1.31493	1.49474	1.57646	1.49192	2.13753	2.12222	1.96352	2.70528	2.57177	2.60767	3.07339	3.07059	3.04602	3.17491	3.19062	3.2199
4.37	1.26559	1.31529	1.31782	1.48805	1.5757	1.49197	2.14323	2.12278	1.96066	2.70461	2.57905	2.59582	3.07132	3.07516	3.0398	3.1758	3.18891	3.22064
4.37333	1.26172	1.31598	1.31422	1.4902	1.57995	1.49593	2.1364	2.12266	1.96514	2.70226	2.57259	2.60647	3.07118	3.076	3.04186	3.17794	3.18766	3.22433
4.37667	1.26368	1.3175	1.31476	1.49184	1.57634	1.49345	2.13599	2.12406	1.96402	2.70543	2.57508	2.59985	3.07031	3.07415	3.03767	3.17853	3.19032	3.22015
4.38	1.2704	1.31441	1.32055	1.49195	1.5787	1.49263	2.13944	2.11911	1.96259	2.70063	2.57199	2.59677	3.07109	3.07334	3.03229	3.17254	3.18893	3.22257
4.38333	1.26505	1.31457	1.32364	1.48882	1.57402	1.49362	2.13889	2.1226	1.96275	2.69692	2.57202	2.59776	3.06888	3.07362	3.04052	3.17725	3.18952	3.2248
4.38667	1.26354	1.31017	1.31448	1.49545	1.57681	1.49283	2.13463	2.12177	1.96491	2.70544	2.57943	2.60519	3.07587	3.07401	3.03663	3.17435	3.18673	3.22572
4.39	1.26094	1.31378	1.31714	1.49509	1.57508	1.4932	2.13646	2.12013	1.96485	2.70087	2.58229	2.60707	3.07884	3.07515	3.03633	3.1821	3.18547	3.2202
4.39333	1.26042	1.31339	1.31692	1.49005	1.57548	1.49782	2.13742	2.1228	1.96209	2.70235	2.57344	2.60245	3.07317	3.07712	3.03643	3.17409	3.18726	3.2219
4.39667	1.26676	1.31717	1.31743	1.49487	1.57448	1.4933	2.13978	2.1248	1.965	2.70383	2.57976	2.60339	3.0668	3.07473	3.03754	3.17135	3.18633	3.22384
4.4	1.26899	1.31749	1.31917	1.48923	1.57603	1.49191	2.13412	2.11653	1.96229	2.70245	2.57267	2.5967	3.07265	3.07506	3.03392	3.17668	3.18686	3.21888
4.40333	1.26464	1.31588	1.3162	1.49072	1.57251	1.49501	2.13621	2.11716	1.95877	2.69999	2.57465	2.59388	3.06892	3.07316	3.03866	3.17238	3.18957	3.22221
4.40667	1.26347	1.31346	1.31502	1.49286	1.5828	1.49721	2.13638	2.11954	1.96378	2.70213	2.57874	2.59948	3.07509	3.07175	3.03436	3.178	3.19225	3.22444
4.41	1.26857	1.31738	1.32064	1.49047	1.57637	1.49317	2.13473	2.12045	1.96095	2.70162	2.58398	2.60573	3.06748	3.07459	3.03452	3.17726	3.18483	3.2182
4.41333	1.2684	1.31159	1.3162	1.49082	1.57473	1.49226	2.13598	2.12358	1.96209	2.6995	2.57035	2.59761	3.0701	3.07397	3.0396	3.17538	3.19055	3.21672
4.41667	1.26364	1.31544	1.32225	1.48728	1.57794	1.4931	2.13517	2.12565	1.96507	2.70169	2.57675	2.60184	3.06779	3.07144	3.03465	3.17504	3.18355	3.21882
4.42	1.26664	1.31435	1.32073	1.48808	1.58158	1.49598	2.13071	2.12044	1.96101	2.70227	2.57444	2.60152	3.0735	3.07022	3.03284	3.17159	3.1835	3.21978
4.42333	1.26165	1.31848	1.3179	1.48869	1.58224	1.49455	2.14016	2.11696	1.96717	2.69929	2.5772	2.59385	3.07171	3.07528	3.03351	3.17466	3.18924	3.21852
4.42667	1.26728	1.31356	1.31839	1.48546	1.57532	1.49399	2.13629	2.11958	1.96208	2.70362	2.57601	2.59784	3.06772	3.07001	3.03775	3.16929	3.18388	3.22355
4.43	1.26758	1.31288	1.31978	1.48853	1.57943	1.49382	2.13449	2.11902	1.96346	2.70218	2.57126	2.59734	3.06636	3.07156	3.03879	3.17374	3.18103	3.2243
4.43333	1.26967	1.31711	1.31636	1.48894	1.57904	1.49769	2.13317	2.12432	1.95997	2.70176	2.57262	2.59867	3.07524	3.07276	3.03783	3.1757	3.18334	3.22063
4.43667	1.26288	1.31533	1.31852	1.48724	1.5831	1.49364	2.13625	2.11708	1.9597	2.7009	2.57715	2.5974	3.06675	3.07024	3.03679	3.17229	3.18228	3.21599
4.44	1.26643	1.3156	1.31819	1.49088	1.57981	1.49726	2.13181	2.11463	1.96028	2.70035	2.57535	2.59837	3.07069	3.072	3.03632	3.17069	3.18105	3.22269
4.44333	1.27096	1.31862	1.32054	1.48514	1.57922	1.49546	2.13099	2.11699	1.9609	2.70357	2.57392	2.59923	3.0676	3.06761	3.03336	3.16545	3.18936	3.22338
4.44667	1.26929	1.31779	1.32171	1.49027	1.58105	1.49373	2.13094	2.11674	1.9633	2.70017	2.57408	2.59755	3.06814	3.06856	3.03598	3.17049	3.18354	3.22287
4.45	1.26744	1.31466	1.31869	1.49129	1.57985	1.49788	2.13273	2.12064	1.96629	2.69334	2.57331	2.59931	3.06608	3.0681	3.03769	3.17065	3.18569	3.22266
4.45333	1.26915	1.31606	1.32358	1.48333	1.57905	1.49428	2.13817	2.12006	1.96233	2.69821	2.57629	2.59315	3.06752	3.06815	3.0372	3.16891	3.18537	3.2209
4.45667	1.27142	1.3173	1.31972	1.49205	1.57904	1.49764	2.13097	2.12142	1.96205	2.69912	2.57267	2.59549	3.07077	3.06844	3.0372	3.17067	3.1877	3.21922
4.46	1.26368	1.31743	1.32218	1.48678	1.58179	1.49797	2.13223	2.12501	1.96132	2.69885	2.5757	2.59968	3.06834	3.06847	3.03097	3.17146	3.18413	3.21685
4.46333	1.26377	1.31874	1.32019	1.48807	1.57974	1.4942	2.13547	2.11934	1.96215	2.69561	2.57702	2.60022	3.06792	3.07228	3.03516	3.17201	3.18255	3.21402
4.46667	1.27162	1.31903	1.32107	1.48998	1.58131	1.50032	2.1322	2.12222	1.96191	2.69866	2.57133	2.59881	3.06685	3.06922	3.03596	3.16752	3.17829	3.2218
4.47	1.2697	1.31825	1.32598	1.48715	1.58151	1.49657	2.13488	2.12537	1.96057	2.70055	2.57242	2.59751	3.06637	3.07197	3.03139	3.17079	3.1799	3.21875
4.47333	1.26801	1.32191	1.31982	1.48777	1.58094	1.49231	2.12982	2.12319	1.96105	2.70239	2.57433	2.60403	3.06957	3.06754	3.03338	3.16557	3.18307	3.21743
4.47667	1.26872	1.32174	1.31991	1.48584	1.57909	1.49533	2.13157	2.11998	1.96135	2.69982	2.57523	2.60024	3.07525	3.07203	3.03651	3.16689	3.18453	3.21979
4.48	1.26819	1.32059	1.31752	1.48636	1.57946	1.49373	2.1338	2.11586	1.95998	2.69733	2.5799	2.59793	3.06695	3.06828	3.03393	3.16973	3.17705	3.21607
4.48333	1.26817	1.31513	1.32272	1.48728	1.58107	1.49126	2.13335	2.11918	1.96041	2.70012	2.57524	2.60041	3.06479	3.0672	3.03413	3.16499	3.18599	3.22064
4.48667	1.26652	1.31649	1.32376	1.4902	1.58058	1.49731	2.13192	2.12132	1.96133	2.69821	2.57349	2.59671	3.06609	3.06869	3.03526	3.17013	3.1812	3.21318
4.49	1.26809	1.31985	1.32144	1.48966	1.57804	1.49341	2.13638	2.11885	1.95697	2.7	2.57528	2.59955	3.06717	3.07322	3.03178	3.16674	3.18373	3.22192
4.49333	1.26853	1.32165	1.32175	1.48693	1.58333	1.49494	2.13222	2.12261	1.96205	2.69697	2.57287	2.59841	3.06542	3.06963	3.03135	3.1689	3.18123	3.21578
4.49667	1.27302	1.32137	1.32229	1.485	1.5829	1.49468	2.1374	2.12302	1.96161	2.70197	2.57719	2.59973	3.06789	3.06652	3.02909	3.16929	3.18475	3.21795
4.5	1.26696	1.31552	1.3228	1.48922	1.58432	1.50037	2.13425	2.12084	1.96449	2.6987	2.57067	2.5991	3.06046	3.06839	3.03352	3.16627	3.18273	3.21624
4.50333	1.27053	1.31776	1.32147	1.4878	1.57937	1.49562	2.13553	2.1241	1.96035	2.70149	2.57455	2.59772	3.06222	3.0679	3.03538	3.16689	3.17795	3.2187
4.50667	1.26844	1.32102	1.32635	1.48779	1.58141	1.49562	2.12963	2.11779	1.96108	2.70004	2.57654	2.60276	3.06307	3.06132	3.03435	3.1627	3.18425	3.21624
4.51	1.27161	1.32181	1.3255	1.49438	1.58078	1.49416	2.13191	2.11848	1.96099	2.69717	2.57564	2.60519	3.06449	3.06777	3.03347	3.1668	3.18166	3.21767
4.51333	1.26909	1.31691	1.32038	1.49013	1.58038	1.49374	2.12998	2.12607	1.96286	2.69609	2.57787	2.60374	3.06438	3.06772	3.03054	3.16261	3.18611	3.21461
4.51667	1.26759	1.32089	1.32381	1.48941	1.58149	1.49791	2.13042	2.12272	1.96468	2.69802	2.57484	2.5885	3.06638	3.06707	3.03768	3.16815	3.17804	3.214
4.52	1.27212	1.31653	1.32516	1.4937	1.58191	1.49462	2.13229	2.11793	1.96373	2.69459	2.57013	2.59015	3.06902	3.06937	3.03008	3.16677	3.17338	3.21663
4.52333	1.26982	1.32249	1.32635	1.48783	1.58412	1.49664	2.13066	2.12121	1.96153	2.70464	2.56937	2.59983	3.05949	3.07038	3.03083	3.16066	3.17488	3.2215
4.52667	1.26453	1.3147	1.32029	1.48829	1.58352	1.4979	2.1326	2.11822	1.96106	2.69747	2.57345	2.60004	3.06425	3.06668	3.03465	3.16306	3.17781	3.21536
4.53	1.26877	1.31779	1.32498	1.48755	1.58311	1.49872	2.13086	2.11877	1.96353	2.69632	2.56897	2.59258	3.06165	3.06225	3.02887	3.16884	3.17683	3.21633
4.53333	1.26562	1.32012	1.32882	1.49246	1.58305	1.49406	2.13434	2.123	1.96068	2.69817	2.57208	2.5993	3.06628	3.06593	3.03134	3.16742	3.18058	3.2166
4.53667	1.26341	1.32159	1.32998	1.49078	1.5792	1.49021	2.13556	2.12365	1.96276	2.69626	2.57281	2.59591	3.06702	3.07137	3.03709	3.16906	3.17957	3.21493
4.54	1.2696	1.32339	1.32299	1.48924	1.58033	1.49854	2.12992	2.12154	1.96017	2.69684	2.57501	2.59493	3.06612	3.06539	3.03213	3.16735	3.17948	3.21481
4.54333	1.27017	1.32013	1.31963	1.49009	1.58553	1.4982	2.1312	2.11803	1.96205	2.69586	2.57404	2.59133	3.06711	3.06769	3.03056	3.16087	3.17862	3.21355
4.54667	1.26627	1.31411	1.32752	1.48892	1.59097	1.49485	2.13225	2.11684	1.96473	2.69976	2.57461	2.59812	3.06167	3.06786	3.03266	3.16574	3.17649	3.20935
4.55	1.26913	1.32162	1.32373	1.48742	1.57892	1.49751	2.12836	2.1218	1.95833	2.70017	2.57382	2.60163	3.06369	3.06398	3.02813	3.1653	3.17962	3.216
4.55333	1.27017	1.31979	1.32932	1.48974	1.58298	1.49713	2.13273	2.12286	1.96276	2.69934	2.57858	2.59374	3.06517	3.06503	3.03032	3.16143	3.17105	3.21057
4.55667	1.27127	1.3244	1.32772	1.4901	1.58632	1.49478	2.133	2.1203	1.96377	2.69591	2.57489	2.59102	3.06106	3.06237	3.02723	3.15854	3.17944	3.21436
4.56	1.27539	1.32128	1.32764	1.48657	1.58096	1.49375	2.12817	2.11722	1.96426	2.69899	2.57414	2.59806	3.06302	3.06302	3.02535	3.16439	3.17241	3.21398
4.56333	1.26755	1.32043	1.32627	1.49013	1.58699	1.49661	2.13649	2.11952	1.96083	2.70004	2.57548	2.59862	3.06279	3.06511	3.03077	3.1611	3.18033	3.21365
4.56667	1.26396	1.32443	1.32482	1.49099	1.58169	1.50045	2.13144	2.11841	1.96739	2.70032	2.57088	2.59771	3.05784	3.06595	3.02876	3.16404	3.17083	3.21433
4.57	1.27473	1.31981	1.33321	1.48754	1.58456	1.49858	2.12987	2.11642	1.9573	2.69591	2.57283	2.59493	3.05782	3.06409	3.03043	3.16455	3.17652	3.21259
4.57333	1.27164	1.32245	1.32575	1.48628	1.58429	1.49884	2.12936	2.11762	1.96024	2.69719	2.56898	2.60032	3.0631	3.06532	3.02577	3.16143	3.1779	3.21344
4.57667	1.27083	1.32696	1.32563	1.48624	1.58455	1.50232	2.13371	2.121	1.96509	2.69761	2.57188	2.59807	3.05769	3.06379	3.02771	3.16701	3.18029	3.20928
4.58	1.27137	1.32078	1.32843	1.48908	1.58211	1.4953	2.13082	2.12194	1.96359	2.70057	2.56281	2.598	3.06279	3.06663	3.03205	3.16066	3.17787	3.21246
4.58333	1.26933	1.32426	1.33012	1.48399	1.58316	1.49774	2.13387	2.11702	1.96329	2.69827	2.57394	2.59763	3.05822	3.06429	3.02995	3.164	3.18033	3.21256
4.58667	1.26956	1.32227	1.32943	1.48737	1.58247	1.49588	2.12775	2.11918	1.96249	2.69741	2.57215	2.59739	3.05367	3.05974	3.02473	3.1633	3.17283	3.21102
4.59	1.27334	1.3211	1.32796	1.4876	1.58479	1.50528	2.13502	2.11907	1.96029	2.69426	2.56978	2.59477	3.06556	3.06279	3.02777	3.16336	3.17376	3.20993
4.59333	1.26649	1.3226	1.32947	1.4844	1.58708	1.49962	2.12536	2.12207	1.9629	2.69416	2.57645	2.59026	3.06627	3.06952	3.02778	3.16629	3.17751	3.21117
4.59667	1.26532	1.3246	1.32809	1.48157	1.5864	1.49677	2.12389	2.1213	1.95802	2.69926	2.569	2.59333	3.05429	3.06688	3.02871	3.15634	3.17352	3.20956
4.6	1.26646	1.31757	1.32453	1.48717	1.58781	1.49486	2.13507	2.12278	1.96498	2.69527	2.5745	2.59757	3.05647	3.05869	3.02345	3.16121	3.17787	3.20584
4.60333	1.2705	1.32011	1.32606	1.48642	1.58399	1.49957	2.13101	2.12104	1.96602	2.69605	2.5758	2.59947	3.05604	3.06156	3.0296	3.15923	3.17255	3.21072
4.60667	1.26812	1.32423	1.32894	1.48604	1.58693	1.49625	2.12928	2.11364	1.96703	2.69786	2.57337	2.59384	3.05607	3.06177	3.02814	3.15901	3.17334	3.20575
4.61	1.26971	1.31914	1.32606	1.48308	1.58227	1.50375	2.12872	2.12132	1.96366	2.69349	2.5729	2.58956	3.05905	3.06154	3.03003	3.15311	3.17598	3.20844
4.61333	1.27022	1.32299	1.33454	1.48587	1.58711	1.49621	2.13086	2.12175	1.96058	2.70003	2.57745	2.59562	3.05574	3.06543	3.02721	3.15884	3.17802	3.20705
4.61667	1.2691	1.32417	1.328	1.48951	1.5839	1.49923	2.12944	2.12185	1.96015	2.69931	2.57098	2.59759	3.06154	3.05952	3.02966	3.16007	3.17329	3.20973
4.62	1.26881	1.3271	1.32669	1.48403	1.58195	1.49992	2.13049	2.1202	1.96179	2.69179	2.56838	2.5959	3.05972	3.05804	3.02712	3.16099	3.17315	3.20644
4.62333	1.2713	1.32219	1.33005	1.48395	1.58426	1.50022	2.12974	2.11841	1.96052	2.69125	2.57497	2.59325	3.05666	3.0638	3.033	3.15712	3.17202	3.21055
4.62667	1.27306	1.32444	1.33159	1.48985	1.58516	1.50246	2.12782	2.12139	1.9681	2.69216	2.57088	2.59564	3.05448	3.0602	3.02424	3.15989	3.17322	3.21067
4.63	1.26676	1.31759	1.32679	1.48838	1.58649	1.49936	2.13233	2.12036	1.96291	2.69829	2.5736	2.59677	3.05631	3.064	3.0261	3.1552	3.17294	3.20748
4.63333	1.26754	1.32575	1.32701	1.48593	1.58524	1.5032	2.12702	2.12139	1.9632	2.69851	2.57253	2.58552	3.05839	3.0545	3.02668	3.15555	3.17147	3.20901
4.63667	1.26913	1.33003	1.32771	1.49072	1.58828	1.50078	2.1357	2.12417	1.95791	2.69478	2.57563	2.59724	3.05159	3.06218	3.02834	3.15688	3.17578	3.20626
4.64	1.27092	1.32462	1.32975	1.48414	1.58617	1.49605	2.13093	2.11708	1.9626	2.69351	2.57451	2.59215	3.06306	3.06187	3.02518	3.15386	3.17093	3.20687
4.64333	1.26918	1.32384	1.32994	1.48533	1.58961	1.49981	2.12764	2.11685	1.95841	2.69713	2.57573	2.596	3.05463	3.06454	3.02471	3.15745	3.16716	3.21079
4.64667	1.2688	1.32625	1.3323	1.48301	1.58323	1.50009	2.1311	2.12092	1.96682	2.69116	2.57521	2.59708	3.05564	3.0629	3.02459	3.15496	3.17347	3.20997
4.65	1.27343	1.32207	1.3301	1.48607	1.58316	1.49792	2.13143	2.11756	1.95857	2.69198	2.56514	2.59509	3.05519	3.06032	3.02406	3.15502	3.17086	3.20051
4.65333	1.27397	1.32333	1.33119	1.4838	1.59025	1.49814	2.12934	2.12522	1.96662	2.6947	2.56269	2.59824	3.05693	3.05384	3.02422	3.1537	3.16827	3.20889
4.65667	1.26347	1.32364	1.32955	1.48806	1.58886	1.49796	2.12671	2.12175	1.96424	2.69233	2.57314	2.59535	3.05295	3.06274	3.02318	3.16075	3.17314	3.21049
4.66	1.27087	1.32617	1.32645	1.48347	1.58619	1.50006	2.13372	2.11663	1.9651	2.69603	2.57173	2.59542	3.05739	3.05696	3.02423	3.15525	3.17378	3.20415
4.66333	1.27158	1.32272	1.32992	1.48998	1.58532	1.50099	2.12911	2.1172	1.96187	2.69402	2.56895	2.59357	3.05654	3.05711	3.02438	3.15514	3.17072	3.20756
4.66667	1.27032	1.32845	1.32943	1.4866	1.59152	1.50492	2.12443	2.11581	1.96098	2.69652	2.57232	2.58923	3.05806	3.06013	3.02237	3.15979	3.172	3.20507
4.67	1.26997	1.32373	1.32723	1.48686	1.58472	1.49961	2.1317	2.11781	1.96219	2.69493	2.57002	2.59074	3.05597	3.05786	3.02439	3.16175	3.16882	3.20382
4.67333	1.27265	1.32782	1.3274	1.48478	1.59246	1.4972	2.12508	2.11571	1.96619	2.6992	2.56983	2.59682	3.05497	3.05654	3.02232	3.15412	3.16348	3.20424
4.67667	1.27075	1.32453	1.33139	1.48388	1.59048	1.50134	2.12645	2.12488	1.96332	2.69414	2.574	2.59017	3.05405	3.05783	3.02551	3.15795	3.17024	3.20486
4.68	1.26794	1.32941	1.33097	1.4847	1.59006	1.50043	2.13	2.11976	1.95977	2.69463	2.57147	2.59194	3.05481	3.05325	3.02607	3.15389	3.16519	3.20586
4.68333	1.27405	1.32674	1.32949	1.48417	1.5864	1.5037	2.12839	2.11828	1.96377	2.69507	2.5696	2.59553	3.05531	3.05647	3.02328	3.1534	3.16559	3.20392
4.68667	1.27127	1.32549	1.33031	1.48307	1.58563	1.49809	2.12929	2.1212	1.95618	2.69323	2.56975	2.59717	3.05096	3.05317	3.0246	3.15472	3.17346	3.20495
4.69	1.26981	1.32663	1.33054	1.49052	1.58181	1.50194	2.13	2.11549	1.96637	2.69289	2.57385	2.59362	3.05192	3.05508	3.02355	3.15366	3.17212	3.20453
4.69333	1.27012	1.32484	1.33346	1.48805	1.59076	1.50293	2.12812	2.11864	1.95925	2.69506	2.56956	2.59668	3.05808	3.05671	3.02114	3.15446	3.16627	3.20211
4.69667	1.26982	1.32615	1.33197	1.48388	1.58765	1.50233	2.12717	2.11633	1.96036	2.69297	2.56904	2.5873	3.05395	3.05607	3.02385	3.1498	3.16771	3.20395
4.7	1.27014	1.32533	1.32909	1.4806	1.59073	1.49851	2.12512	2.1162	1.96021	2.69132	2.57054	2.59665	3.05247	3.05971	3.02286	3.15263	3.16792	3.20679
4.70333	1.2729	1.32656	1.33133	1.4849	1.58313	1.50526	2.12768	2.11982	1.96335	2.69254	2.56595	2.59501	3.05402	3.0551	3.02542	3.15039	3.16935	3.20553
4.70667	1.27047	1.3298	1.33066	1.48349	1.58706	1.49972	2.12859	2.12148	1.96181	2.69966	2.5745	2.59627	3.0493	3.05788	3.02328	3.15722	3.1658	3.19904
4.71	1.26793	1.33237	1.33165	1.4874	1.59254	1.50398	2.12533	2.12139	1.96089	2.69504	2.57246	2.59593	3.05407	3.05545	3.02437	3.15596	3.16676	3.2064
4.71333	1.2694	1.32288	1.33448	1.48115	1.58702	1.49495	2.12713	2.11934	1.95783	2.69659	2.56943	2.59304	3.04786	3.05671	3.02801	3.14803	3.16558	3.20806
4.71667	1.27324	1.3302	1.33395	1.48373	1.59684	1.50275	2.12531	2.11868	1.96327	2.69136	2.56447	2.58498	3.05505	3.05193	3.0252	3.14987	3.16731	3.20335
4.72	1.26398	1.33523	1.33444	1.48666	1.59142	1.49968	2.13084	2.12522	1.96275	2.68811	2.57438	2.58927	3.05282	3.05871	3.02489	3.15301	3.16186	3.20478
4.72333	1.26656	1.32643	1.3315	1.48427	1.58845	1.50206	2.12645	2.12	1.96149	2.69047	2.56479	2.59133	3.0502	3.05406	3.02747	3.1518	3.1681	3.20705
4.72667	1.26918	1.33037	1.33244	1.48426	1.58503	1.49708	2.1254	2.12001	1.96563	2.69221	2.57083	2.59415	3.05534	3.05646	3.02514	3.15396	3.169	3.20722
4.73	1.2721	1.33181	1.33109	1.48936	1.59089	1.49913	2.12386	2.12224	1.96059	2.69323	2.56733	2.59502	3.04922	3.04752	3.02178	3.14928	3.16665	3.20137
4.73333	1.27088	1.32816	1.33196	1.49048	1.58754	1.5033	2.12143	2.11953	1.96238	2.69624	2.5713	2.59474	3.05078	3.05491	3.02232	3.1511	3.16747	3.20438
4.73667	1.26941	1.32565	1.33464	1.48312	1.58934	1.50262	2.12531	2.1216	1.96073	2.68876	2.56637	2.5952	3.05127	3.05135	3.02613	3.15	3.16544	3.20483
4.74	1.27159	1.32735	1.33141	1.48466	1.58993	1.49995	2.12325	2.12026	1.96231	2.69145	2.57069	2.59278	3.054	3.0505	3.024	3.15116	3.16431	3.19798
4.74333	1.27093	1.32768	1.33748	1.4867	1.59339	1.50164	2.12245	2.11974	1.96166	2.694	2.57024	2.58869	3.04886	3.05555	3.02048	3.15003	3.16574	3.20221
4.74667	1.27482	1.32818	1.33364	1.48827	1.59756	1.50123	2.12197	2.11812	1.96295	2.6898	2.56703	2.59131	3.04931	3.05869	3.02372	3.14948	3.16432	3.19775
4.75	1.27374	1.32912	1.33733	1.48125	1.58621	1.50341	2.12557	2.12093	1.96582	2.69248	2.56769	2.59291	3.04944	3.05071	3.02674	3.15159	3.16686	3.19883
4.75333	1.27132	1.32906	1.33521	1.48517	1.5893	1.49866	2.12621	2.11628	1.96017	2.69298	2.57082	2.59733	3.05226	3.04983	3.02106	3.148	3.16375	3.20143
4.75667	1.26977	1.32953	1.33589	1.48792	1.59187	1.49823	2.12765	2.11646	1.96601	2.68889	2.56661	2.59671	3.04535	3.05044	3.02528	3.15133	3.16118	3.20253
4.76	1.27412	1.33231	1.3329	1.48199	1.59006	1.49744	2.12065	2.12398	1.96339	2.69242	2.56785	2.59156	3.04923	3.0499	3.02454	3.14713	3.16829	3.20066
4.76333	1.276	1.33224	1.33845	1.48761	1.59498	1.49944	2.12656	2.12007	1.96543	2.68449	2.56611	2.59358	3.04407	3.05142	3.021	3.14887	3.16477	3.19798
4.76667	1.27008	1.3293	1.33395	1.47904	1.59236	1.49928	2.12329	2.11916	1.96451	2.69275	2.56482	2.5943	3.05428	3.05644	3.02093	3.15291	3.16556	3.19899
4.77	1.26757	1.32674	1.33185	1.4835	1.59307	1.50653	2.12573	2.12123	1.96351	2.69448	2.57396	2.59299	3.04926	3.05118	3.02309	3.14578	3.16596	3.20091
4.77333	1.27103	1.32974	1.33385	1.48498	1.59135	1.50398	2.12525	2.1243	1.96369	2.69048	2.56935	2.58964	3.04601	3.05652	3.02485	3.14678	3.16447	3.19719
4.77667	1.26865	1.33262	1.3313	1.48316	1.59174	1.50023	2.12528	2.11876	1.96306	2.68971	2.56512	2.59452	3.04802	3.0498	3.01899	3.15421	3.15515	3.19632
4.78	1.26735	1.33068	1.33754	1.48296	1.58932	1.50413	2.12199	2.11713	1.96175	2.69218	2.56715	2.59206	3.04968	3.05407	3.0199	3.14545	3.1668	3.19418
4.78333	1.26887	1.33199	1.33105	1.48443	1.59038	1.5011	2.12709	2.11841	1.96242	2.69346	2.56986	2.5943	3.05041	3.0507	3.01744	3.14848	3.16283	3.19782
4.78667	1.26837	1.3316	1.33038	1.48214	1.59516	1.50479	2.12732	2.11836	1.96627	2.69437	2.56355	2.60036	3.04506	3.05227	3.02013	3.14819	3.16599	3.19733
4.79	1.26993	1.33085	1.34081	1.48656	1.59547	1.50534	2.1265	2.11859	1.96427	2.68735	2.56475	2.59199	3.04788	3.05143	3.02089	3.14404	3.16388	3.19821
4.79333	1.27132	1.32916	1.33718	1.48211	1.59059	1.50024	2.12446	2.11924	1.96297	2.69236	2.56464	2.59327	3.047	3.05565	3.01715	3.13938	3.16148	3.20097
4.79667	1.26758	1.33129	1.33866	1.48803	1.59271	1.50278	2.12283	2.12093	1.96537	2.69091	2.56899	2.59156	3.04778	3.04663	3.01894	3.14754	3.16292	3.19932
4.8	1.27601	1.3302	1.33383	1.48327	1.59015	1.50421	2.12498	2.12074	1.95989	2.68873	2.56827	2.58841	3.04568	3.04775	3.01686	3.14661	3.16539	3.19897
4.80333	1.27636	1.32754	1.33349	1.48082	1.59173	1.50165	2.12213	2.12166	1.96015	2.69311	2.57198	2.59242	3.04348	3.04904	3.01914	3.14125	3.16046	3.19643
4.80667	1.2706	1.33322	1.33895	1.48389	1.58992	1.49698	2.11999	2.11834	1.96657	2.68772	2.56499	2.59121	3.04693	3.05058	3.01908	3.14386	3.16249	3.19796
4.81	1.27155	1.33475	1.33637	1.48251	1.59204	1.50591	2.12068	2.11964	1.96441	2.68788	2.56757	2.58875	3.05178	3.0544	3.01812	3.1459	3.1591	3.19714
4.81333	1.2743	1.33271	1.33855	1.48216	1.59273	1.503	2.12363	2.11926	1.95599	2.69448	2.57101	2.59408	3.04128	3.04554	3.01815	3.14544	3.16412	3.1969
4.81667	1.27149	1.33281	1.34047	1.48262	1.5895	1.50459	2.12784	2.11551	1.96019	2.68878	2.56276	2.59366	3.04809	3.05053	3.02159	3.14748	3.16131	3.19448
4.82	1.27122	1.33326	1.34036	1.48074	1.59291	1.50625	2.118	2.11655	1.96028	2.68359	2.57177	2.5868	3.04663	3.05301	3.02168	3.14253	3.15873	3.19946
4.82333	1.26913	1.33238	1.33675	1.47747	1.60033	1.50307	2.12107	2.1247	1.96328	2.69043	2.56788	2.59226	3.04546	3.04856	3.01738	3.14348	3.16033	3.20344
4.82667	1.26957	1.3325	1.33535	1.48752	1.59131	1.50107	2.11822	2.11854	1.96018	2.69151	2.56912	2.58943	3.04741	3.04936	3.02301	3.14272	3.15704	3.19557
4.83	1.26776	1.33262	1.33761	1.48779	1.59193	1.50228	2.12409	2.11814	1.96601	2.68745	2.57011	2.59529	3.04342	3.0432	3.01376	3.14146	3.15731	3.19532
4.83333	1.27345	1.33066	1.33727	1.48112	1.59347	1.50101	2.11894	2.11689	1.96489	2.69414	2.56618	2.58942	3.03767	3.05225	3.01676	3.14972	3.15758	3.19391
4.83667	1.26692	1.33299	1.33356	1.48316	1.59613	1.50265	2.1288	2.11884	1.96131	2.69227	2.57363	2.59421	3.04649	3.04735	3.02109	3.14268	3.15961	3.20099
4.84	1.26624	1.33311	1.33805	1.48801	1.59522	1.50363	2.11831	2.11689	1.96071	2.6895	2.56624	2.58917	3.04661	3.04886	3.02229	3.13662	3.16509	3.19537
4.84333	1.27354	1.33	1.33776	1.48191	1.59467	1.50758	2.1232	2.12071	1.96172	2.68801	2.56752	2.58844	3.04274	3.04794	3.02108	3.14232	3.16573	3.19618
4.84667	1.27093	1.32727	1.33585	1.48622	1.59364	1.50554	2.12566	2.12214	1.96277	2.68787	2.57094	2.59145	3.0414	3.04584	3.01743	3.13806	3.15746	3.19051
4.85	1.27215	1.33915	1.33689	1.47985	1.59686	1.50056	2.12303	2.11989	1.96072	2.69037	2.56698	2.59162	3.04667	3.04758	3.01811	3.14249	3.15658	3.1925
4.85333	1.27134	1.33411	1.33729	1.48438	1.59463	1.49911	2.12104	2.12302	1.96249	2.69051	2.56501	2.59371	3.04424	3.049	3.016	3.14092	3.15779	3.20202
4.85667	1.27219	1.33773	1.33822	1.48475	1.59228	1.50383	2.12158	2.12108	1.96269	2.68763	2.56648	2.58948	3.04613	3.05201	3.01814	3.14128	3.16264	3.19005
4.86	1.27425	1.33428	1.33688	1.48287	1.59351	1.50448	2.12129	2.11616	1.96408	2.68923	2.56536	2.58938	3.03926	3.0475	3.01239	3.14112	3.16009	3.19342
4.86333	1.2709	1.33277	1.34208	1.48245	1.59449	1.50077	2.12027	2.11916	1.95993	2.68452	2.5692	2.59063	3.03905	3.0465	3.01705	3.14312	3.15723	3.19853
4.86667	1.27367	1.33673	1.33556	1.48368	1.5993	1.503	2.124	2.11563	1.96332	2.68521	2.56869	2.59086	3.04551	3.05	3.01903	3.13716	3.15654	3.19192
4.87	1.27447	1.33516	1.3321	1.48446	1.59462	1.50559	2.12798	2.12167	1.96558	2.6883	2.56519	2.59423	3.03993	3.04326	3.01665	3.1437	3.15936	3.19302
4.87333	1.2738	1.33487	1.34018	1.48131	1.59628	1.50351	2.12312	2.12158	1.95625	2.68845	2.56689	2.58859	3.04583	3.04611	3.01788	3.13795	3.1563	3.19461
4.87667	1.27065	1.33619	1.34411	1.48264	1.60208	1.49975	2.12516	2.11933	1.95968	2.6857	2.56659	2.5857	3.04796	3.03985	3.01581	3.14528	3.15644	3.19553
4.88	1.26854	1.33682	1.33903	1.47706	1.59939	1.50717	2.12527	2.11879	1.96477	2.68973	2.5682	2.59442	3.03898	3.04608	3.01524	3.13296	3.15907	3.20012
4.88333	1.27426	1.33792	1.33646	1.48107	1.59446	1.50126	2.12588	2.11986	1.9608	2.68824	2.56359	2.59333	3.04398	3.04678	3.01374	3.14198	3.15521	3.19402
4.88667	1.27473	1.33699	1.34019	1.48498	1.60054	1.50697	2.11693	2.11758	1.96408	2.68956	2.56694	2.58837	3.04096	3.04401	3.01465	3.13929	3.15422	3.19771
4.89	1.27376	1.33698	1.33599	1.49	1.59532	1.50982	2.12107	2.12043	1.96444	2.69005	2.57081	2.58689	3.0454	3.04999	3.01249	3.13992	3.15783	3.19304
4.89333	1.27057	1.33601	1.34281	1.48056	1.59317	1.50329	2.12141	2.11778	1.96195	2.68509	2.56437	2.59344	3.03834	3.04559	3.01209	3.13948	3.15849	3.19463
4.89667	1.27477	1.33708	1.33994	1.47721	1.59134	1.5033	2.11669	2.1174	1.96356	2.68592	2.56607	2.59438	3.03872	3.04355	3.01837	3.14102	3.15654	3.19195
4.9	1.27155	1.3379	1.34286	1.48071	1.59656	1.50239	2.12262	2.11839	1.96429	2.69325	2.56174	2.59043	3.04	3.04405	3.01478	3.137	3.15386	3.19406
4.90333	1.27184	1.33318	1.34492	1.48103	1.59663	1.50193	2.11597	2.11605	1.96128	2.68533	2.5646	2.58992	3.04559	3.04587	3.01639	3.1366	3.15544	3.19439
4.90667	1.27008	1.33607	1.33861	1.48345	1.599	1.50715	2.12032	2.11438	1.96106	2.69402	2.56712	2.6001	3.04191	3.04245	3.0118	3.13561	3.15534	3.18942
4.91	1.27502	1.33426	1.34331	1.48228	1.59347	1.50395	2.11804	2.11971	1.95898	2.68861	2.5674	2.58542	3.03879	3.04465	3.0132	3.13806	3.15727	3.18956
4.91333	1.27471	1.33566	1.34231	1.4826	1.59477	1.5052	2.12	2.11655	1.96273	2.69376	2.56465	2.59142	3.03843	3.04203	3.01151	3.13758	3.15651	3.19212
4.91667	1.27404	1.33428	1.34297	1.47946	1.5976	1.50444	2.12083	2.12117	1.96446	2.69034	2.56753	2.58695	3.03743	3.04618	3.01463	3.1381	3.15459	3.19001
4.92	1.27222	1.3374	1.33922	1.47853	1.59747	1.50331	2.12082	2.1197	1.96415	2.68587	2.56432	2.59343	3.03591	3.04161	3.01401	3.13633	3.15393	3.18702
4.92333	1.27144	1.33677	1.3409	1.47982	1.59885	1.50297	2.12096	2.11781	1.9618	2.68304	2.56647	2.59038	3.03853	3.04162	3.01638	3.13538	3.15394	3.18953
4.92667	1.27265	1.33481	1.34134	1.47791	1.59904	1.50216	2.11991	2.11977	1.96073	2.68044	2.5631	2.58852	3.04558	3.04652	3.01623	3.1414	3.15594	3.19325
4.93	1.27417	1.34127	1.33596	1.48161	1.59109	1.50126	2.12232	2.12	1.96788	2.68903	2.56441	2.59279	3.04199	3.03861	3.01478	3.13609	3.14954	3.19139
4.93333	1.27616	1.33486	1.34393	1.47904	1.59346	1.50804	2.12299	2.12123	1.96351	2.6847	2.56865	2.58861	3.0387	3.04263	3.01352	3.13199	3.15609	3.19157
4.93667	1.27594	1.33309	1.33871	1.47858	1.59943	1.49959	2.12058	2.11507	1.96539	2.68587	2.56374	2.58604	3.03335	3.0454	3.01348	3.13609	3.1508	3.19486
4.94	1.27392	1.33412	1.3451	1.47519	1.59483	1.49734	2.12012	2.11975	1.95864	2.68828	2.56463	2.58855	3.04052	3.04288	3.01228	3.13284	3.15557	3.1876
4.94333	1.27667	1.33692	1.34032	1.47852	1.59966	1.50256	2.12218	2.11595	1.96242	2.69	2.56369	2.58773	3.03832	3.0435	3.01289	3.13691	3.15018	3.18818
4.94667	1.27517	1.34121	1.34347	1.4763	1.5977	1.50783	2.12435	2.11467	1.95973	2.68131	2.56739	2.58807	3.04068	3.04493	3.00939	3.13455	3.15422	3.19436
4.95	1.26964	1.33345	1.3393	1.48158	1.59723	1.50691	2.11292	2.11832	1.9594	2.68492	2.56108	2.58363	3.03746	3.04054	3.01579	3.13454	3.14519	3.19272
4.95333	1.27698	1.33659	1.34223	1.48205	1.60042	1.50492	2.11916	2.11308	1.9577	2.68617	2.56416	2.59235	3.03843	3.04162	3.01125	3.13511	3.15208	3.1902
4.95667	1.27392	1.33658	1.34255	1.48116	1.60022	1.50748	2.12115	2.12516	1.96139	2.6889	2.56671	2.58629	3.03762	3.04404	3.01337	3.13447	3.15381	3.19044
4.96	1.27064	1.33701	1.34291	1.48267	1.59789	1.50649	2.11417	2.12339	1.95928	2.68628	2.56485	2.58666	3.0369	3.04021	3.00565	3.13842	3.15239	3.18203
4.96333	1.27469	1.33738	1.34703	1.47643	1.59711	1.50611	2.12061	2.11665	1.95924	2.68631	2.57023	2.59297	3.03483	3.04404	3.01118	3.13438	3.14722	3.18752
4.96667	1.27462	1.33873	1.3436	1.47901	1.59756	1.50237	2.11821	2.12	1.96496	2.68072	2.56263	2.58788	3.03947	3.04248	3.01496	3.13252	3.14368	3.18417
4.97	1.27582	1.33987	1.34289	1.48161	1.59572	1.50504	2.12196	2.11269	1.95603	2.68894	2.56962	2.59104	3.0318	3.04022	3.01222	3.13694	3.1532	3.19221
4.97333	1.27521	1.33962	1.34435	1.48074	1.60266	1.50595	2.11549	2.11983	1.95948	2.68865	2.5598	2.59159	3.03782	3.0406	3.0132	3.13259	3.14306	3.18435
4.97667	1.27496	1.3401	1.33997	1.48017	1.59935	1.50254	2.11588	2.1136	1.95583	2.68363	2.56782	2.58613	3.03663	3.03793	3.01043	3.13253	3.15223	3.18945
4.98	1.27126	1.33509	1.34409	1.48009	1.59338	1.50538	2.11794	2.11797	1.95922	2.68711	2.5662	2.58838	3.0414	3.04121	3.0096	3.13722	3.15505	3.19194
4.98333	1.27476	1.34035	1.34634	1.48049	1.59767	1.50416	2.1184	2.11779	1.95962	2.67861	2.5618	2.58755	3.03715	3.03658	3.00807	3.13591	3.15087	3.18822
4.98667	1.27602	1.335	1.34235	1.47883	1.59949	1.50959	2.11371	2.11742	1.96194	2.68953	2.56608	2.58804	3.04055	3.03893	3.01469	3.1346	3.15489	3.19119
4.99	1.27577	1.33328	1.34719	1.47642	1.60091	1.50727	2.11287	2.11552	1.96032	2.68274	2.56326	2.58603	3.04174	3.03933	3.01352	3.13855	3.1594	3.18905
4.99333	1.27214	1.33677	1.34136	1.47941	1.60482	1.50505	2.1186	2.1192	1.95929	2.68304	2.56957	2.59207	3.03449	3.04675	3.00418	3.13076	3.1511	3.18975
4.99667	1.27169	1.33915	1.3458	1.48103	1.59799	1.50747	2.12164	2.11709	1.95964	2.68492	2.56817	2.59421	3.03471	3.04078	3.01388	3.12971	3.14776	3.18
5	1.26389	1.33724	1.3432	1.47716	1.59813	1.50965	2.1184	2.11698	1.96395	2.68448	2.56906	2.58639	3.03984	3.0381	3.00612	3.13197	3.15334	3.18792
5.00333	1.27737	1.33918	1.3419	1.47955	1.60071	1.5074	2.12242	2.12202	1.96143	2.68357	2.56565	2.58963	3.03865	3.03909	3.01157	3.13216	3.15045	3.18461
5.00667	1.27445	1.33862	1.34323	1.48011	1.59901	1.50821	2.11697	2.11745	1.96517	2.68604	2.56625	2.59155	3.03712	3.04343	3.00751	3.12976	3.14473	3.18054
5.01	1.27477	1.34009	1.34032	1.48006	1.59895	1.5055	2.11879	2.11354	1.96537	2.68498	2.56834	2.58621	3.03318	3.03919	3.00886	3.12983	3.14384	3.18504
5.01333	1.2764	1.33325	1.3477	1.47771	1.5957	1.5072	2.12336	2.11992	1.96586	2.68938	2.5619	2.58906	3.03252	3.03812	3.01086	3.12844	3.14983	3.17801
5.01667	1.27237	1.34401	1.34584	1.47689	1.6008	1.50415	2.11772	2.12225	1.95766	2.68211	2.56629	2.5897	3.03682	3.04169	3.00917	3.12951	3.14608	3.18226
5.02	1.27175	1.3431	1.34055	1.48124	1.60031	1.5009	2.12079	2.11556	1.95729	2.68755	2.55716	2.5901	3.03507	3.0406	3.00896	3.13182	3.15187	3.17923
5.02333	1.27304	1.34041	1.34407	1.48193	1.59578	1.50617	2.12048	2.11682	1.96378	2.68481	2.56411	2.58864	3.037	3.03674	3.00897	3.13075	3.14976	3.18366
5.02667	1.27364	1.33627	1.34719	1.48064	1.60253	1.50836	2.11896	2.11613	1.96102	2.68143	2.57025	2.58862	3.03909	3.04229	3.00589	3.12663	3.14764	3.18674
5.03	1.27401	1.33334	1.34553	1.47845	1.59798	1.50482	2.11631	2.12015	1.96348	2.68135	2.56159	2.595	3.03789	3.04087	3.00919	3.12956	3.14906	3.18644
5.03333	1.27392	1.33737	1.34351	1.47623	1.5999	1.50485	2.11057	2.12112	1.9588	2.68279	2.56463	2.58331	3.0335	3.04175	3.01202	3.12753	3.14958	3.18366
5.03667	1.27587	1.33918	1.34549	1.48169	1.59977	1.50712	2.11716	2.11743	1.96056	2.68239	2.56739	2.58798	3.03378	3.03672	3.00458	3.13158	3.14406	3.18217
5.04	1.27369	1.33892	1.34226	1.47286	1.60273	1.50742	2.11699	2.11873	1.95543	2.67722	2.56363	2.59181	3.02849	3.03442	3.00828	3.12915	3.14616	3.18228
5.04333	1.2721	1.34042	1.34303	1.47584	1.59948	1.50761	2.11321	2.11859	1.95857	2.68457	2.56457	2.58392	3.03363	3.03806	3.01186	3.12918	3.14552	3.18536
5.04667	1.27132	1.33966	1.34472	1.47721	1.60001	1.51214	2.11632	2.12185	1.96585	2.68642	2.56271	2.58151	3.0324	3.03944	3.0073	3.12766	3.14024	3.18473
5.05	1.27256	1.33938	1.34666	1.47779	1.60286	1.50845	2.11915	2.11658	1.95747	2.68549	2.56137	2.58662	3.03611	3.03994	3.01077	3.12869	3.14757	3.18171
5.05333	1.27449	1.33743	1.34596	1.48345	1.60035	1.50663	2.11438	2.11825	1.95945	2.68312	2.56356	2.58579	3.03212	3.03189	3.00701	3.12919	3.14222	3.18395
5.05667	1.27543	1.34426	1.3452	1.47817	1.60611	1.51129	2.11002	2.11937	1.96078	2.67686	2.56833	2.58641	3.03676	3.043	3.01134	3.12843	3.14543	3.18383
5.06	1.27101	1.34254	1.34234	1.47619	1.60016	1.5071	2.1166	2.11611	1.96627	2.68501	2.56073	2.58848	3.03011	3.03536	3.00808	3.12853	3.14753	3.18057
5.06333	1.27471	1.34256	1.34598	1.47495	1.60214	1.50641	2.11834	2.11947	1.9668	2.68156	2.56604	2.58193	3.03272	3.03947	3.00416	3.12762	3.15167	3.18196
5.06667	1.27262	1.34048	1.3462	1.47472	1.59878	1.50635	2.11856	2.1223	1.95567	2.68181	2.56137	2.58941	3.03059	3.03443	3.00487	3.13072	3.14017	3.1798
5.07	1.27615	1.34049	1.34641	1.4738	1.60132	1.50771	2.11847	2.11752	1.96663	2.68646	2.55818	2.59099	3.03046	3.0387	3.00651	3.12661	3.14785	3.1744
5.07333	1.27353	1.33848	1.34735	1.47604	1.60652	1.51225	2.11619	2.11461	1.96173	2.68407	2.56421	2.58703	3.03411	3.03353	3.00275	3.1266	3.14286	3.19126
5.07667	1.27167	1.34392	1.34597	1.48082	1.60262	1.51031	2.11888	2.11815	1.96189	2.6884	2.56325	2.58965	3.0313	3.02971	3.00874	3.12956	3.14139	3.17882
5.08	1.27637	1.34428	1.34648	1.4787	1.60013	1.50347	2.11736	2.11514	1.96381	2.67941	2.56173	2.58386	3.03276	3.03413	3.00353	3.1209	3.14108	3.18041
5.08333	1.27404	1.34443	1.34987	1.4789	1.59421	1.51031	2.11153	2.11722	1.95809	2.68126	2.56178	2.58287	3.03101	3.02915	3.00794	3.12651	3.14534	3.18357
5.08667	1.27351	1.34238	1.34933	1.48464	1.60293	1.50626	2.12056	2.11724	1.96006	2.68302	2.5647	2.58709	3.03075	3.03754	3.00979	3.13148	3.14359	3.18029
5.09	1.27478	1.34095	1.34444	1.48179	1.60371	1.50572	2.11441	2.11707	1.95679	2.67723	2.56243	2.58548	3.0294	3.03204	3.00534	3.12982	3.14516	3.18181
5.09333	1.27826	1.34524	1.34638	1.4746	1.60278	1.51023	2.10968	2.11958	1.96006	2.68394	2.56367	2.58585	3.02488	3.03426	3.00191	3.12541	3.1421	3.17973
5.09667	1.27351	1.34145	1.35052	1.4745	1.6086	1.50875	2.11512	2.12086	1.96057	2.67777	2.56524	2.58588	3.02634	3.03618	3.00545	3.12073	3.14878	3.18159
5.1	1.27921	1.34367	1.34928	1.473	1.60318	1.50535	2.11606	2.11398	1.9601	2.68705	2.55847	2.58626	3.03161	3.03527	3.00075	3.12488	3.13868	3.17916
5.10333	1.27764	1.34448	1.34733	1.47488	1.60427	1.50961	2.11414	2.11807	1.96124	2.67599	2.56237	2.58769	3.02812	3.03095	3.00226	3.12641	3.14397	3.17985
5.10667	1.275	1.34335	1.35013	1.47109	1.60393	1.50933	2.11624	2.12132	1.96356	2.67784	2.56361	2.59166	3.02791	3.03065	3.00137	3.12995	3.14387	3.17692
5.11	1.2752	1.344	1.34592	1.47793	1.60037	1.50486	2.11171	2.12113	1.96401	2.68131	2.56504	2.58473	3.03219	3.03398	3.00416	3.12232	3.14114	3.17839
5.11333	1.27356	1.34413	1.34486	1.47406	1.60452	1.51037	2.11796	2.11496	1.9657	2.68106	2.56168	2.58515	3.03169	3.02983	3.00169	3.12439	3.14126	3.17977
5.11667	1.28182	1.34453	1.35112	1.4782	1.60166	1.50373	2.11496	2.12009	1.96245	2.68272	2.56463	2.58718	3.02849	3.03313	3.00188	3.12298	3.14077	3.17763
5.12	1.28022	1.34208	1.35177	1.47945	1.59939	1.505	2.11773	2.11892	1.96383	2.68617	2.56042	2.58934	3.03102	3.02914	3.00588	3.12278	3.14235	3.17498
5.12333	1.27624	1.3479	1.35104	1.47924	1.60255	1.5067	2.11603	2.11724	1.95851	2.68582	2.56388	2.58329	3.02832	3.02956	3.00253	3.12522	3.14038	3.17991
5.12667	1.27581	1.34384	1.35132	1.47493	1.60319	1.5104	2.1151	2.11044	1.96381	2.68371	2.55969	2.58496	3.02497	3.0345	3.00321	3.12464	3.14339	3.17681
5.13	1.27533	1.33993	1.35075	1.47241	1.60648	1.50967	2.11399	2.11151	1.96463	2.67977	2.56064	2.58484	3.0258	3.03224	3.00278	3.12118	3.14018	3.17745
5.13333	1.26907	1.34606	1.34776	1.47714	1.59784	1.50941	2.11297	2.11865	1.96394	2.68088	2.55743	2.58868	3.03174	3.02959	3.00178	3.12022	3.13819	3.17317
5.13667	1.27942	1.34005	1.34661	1.47496	1.60294	1.50408	2.11665	2.11848	1.96358	2.679	2.5597	2.58463	3.02804	3.03364	3.00509	3.12223	3.14246	3.17609
5.14	1.27214	1.34706	1.35239	1.48098	1.60843	1.51124	2.11459	2.11526	1.96095	2.67705	2.56563	2.58197	3.03343	3.03111	3.00341	3.12225	3.1415	3.17663
5.14333	1.27196	1.34652	1.3489	1.47907	1.6051	1.51237	2.11546	2.1156	1.95882	2.68016	2.55845	2.59275	3.02592	3.03126	3.00365	3.12075	3.14161	3.17882
5.14667	1.27533	1.34196	1.35281	1.4712	1.60703	1.50994	2.11323	2.12068	1.96095	2.67664	2.56627	2.58589	3.03567	3.02761	3.00028	3.11436	3.13906	3.17613
5.15	1.27424	1.34731	1.3511	1.47505	1.6074	1.51121	2.1111	2.117	1.95975	2.68238	2.56392	2.58384	3.02651	3.02756	3.00485	3.12315	3.14193	3.17675
5.15333	1.28015	1.34217	1.35137	1.4805	1.60337	1.5061	2.11912	2.11715	1.95844	2.67618	2.55821	2.58424	3.02971	3.02732	2.99938	3.12116	3.13231	3.17894
5.15667	1.2756	1.33916	1.34961	1.47547	1.60363	1.51345	2.11616	2.11311	1.95877	2.67948	2.56257	2.58285	3.02687	3.03049	3.00329	3.11434	3.1375	3.17398
5.16	1.27514	1.34887	1.34577	1.47928	1.60509	1.50438	2.11514	2.1134	1.96236	2.68052	2.56992	2.58302	3.02911	3.02988	3.0024	3.11735	3.14399	3.17781
5.16333	1.27768	1.34672	1.34947	1.47537	1.60906	1.51287	2.11696	2.11398	1.96073	2.68203	2.56187	2.58497	3.02832	3.03042	3.00377	3.11869	3.14054	3.17981
5.16667	1.27606	1.34341	1.34773	1.47196	1.60825	1.51066	2.1141	2.11623	1.9598	2.68213	2.56685	2.58508	3.02591	3.03227	3.00399	3.12029	3.13916	3.17467
5.17	1.27433	1.3461	1.35272	1.47658	1.6086	1.51527	2.11133	2.11834	1.96286	2.67964	2.56316	2.58611	3.02654	3.02933	2.99739	3.11541	3.1384	3.16914
5.17333	1.27537	1.34493	1.34723	1.48247	1.60877	1.50558	2.11383	2.11843	1.96379	2.68145	2.5532	2.58628	3.0243	3.0262	2.99642	3.11659	3.13979	3.17539
5.17667	1.27205	1.34791	1.34953	1.47092	1.60744	1.51075	2.10755	2.11942	1.95955	2.67452	2.56046	2.58753	3.02376	3.02778	3.00234	3.11507	3.13556	3.17455
5.18	1.27822	1.34605	1.35063	1.47669	1.60783	1.5076	2.11381	2.11855	1.96265	2.67796	2.55853	2.57788	3.02708	3.02782	3.00426	3.12258	3.14029	3.18029
5.18333	1.27592	1.34559	1.35119	1.47502	1.60769	1.50922	2.11572	2.12046	1.96006	2.68057	2.5627	2.58285	3.02212	3.02811	2.99801	3.11561	3.14003	3.17378
5.18667	1.27459	1.34436	1.35047	1.47613	1.60356	1.50737	2.1148	2.11939	1.95608	2.67499	2.55595	2.58318	3.02483	3.02386	2.99915	3.12065	3.14257	3.17185
5.19	1.27795	1.34462	1.34798	1.47821	1.60509	1.5113	2.10849	2.11288	1.96475	2.67359	2.56167	2.58529	3.02906	3.02608	3.00171	3.11968	3.14121	3.17419
5.19333	1.27845	1.3471	1.3499	1.47992	1.60735	1.51192	2.11274	2.11835	1.96385	2.67772	2.56154	2.58216	3.02662	3.0265	2.99452	3.11793	3.13803	3.17648
5.19667	1.27602	1.3481	1.35093	1.47109	1.60251	1.50885	2.11362	2.1162	1.96027	2.68001	2.55963	2.58698	3.02519	3.0324	3.00287	3.12327	3.13439	3.17376
5.2	1.27318	1.34219	1.35031	1.47701	1.60355	1.51342	2.10867	2.11913	1.96257	2.68104	2.55807	2.58036	3.02539	3.03181	3.00151	3.11576	3.13598	3.17649
5.20333	1.27666	1.34445	1.34462	1.47498	1.60627	1.51033	2.10743	2.1185	1.96213	2.67867	2.55723	2.58502	3.02451	3.02551	3.00132	3.11865	3.13184	3.17282
5.20667	1.27477	1.3493	1.34599	1.47166	1.61486	1.51219	2.11208	2.11903	1.95641	2.67665	2.56371	2.57767	3.02133	3.02971	3.00206	3.11432	3.13452	3.17409
5.21	1.27852	1.34773	1.35239	1.47523	1.60564	1.50621	2.11303	2.11917	1.9657	2.68173	2.56114	2.57983	3.02966	3.02987	3.00469	3.11228	3.12981	3.16787
5.21333	1.28196	1.34631	1.3539	1.47944	1.60407	1.51475	2.11512	2.1155	1.96335	2.67937	2.55604	2.58897	3.02363	3.02358	3.00119	3.12121	3.13857	3.17458
5.21667	1.27506	1.34685	1.34909	1.47558	1.60828	1.50605	2.11567	2.11537	1.96115	2.67484	2.56318	2.58351	3.01609	3.02937	3.00226	3.11137	3.13233	3.17044
5.22	1.27651	1.35099	1.35442	1.47297	1.60816	1.51404	2.11017	2.11386	1.96446	2.67946	2.56333	2.58213	3.02321	3.02821	3.00038	3.11945	3.13418	3.17516
5.22333	1.27423	1.34499	1.35264	1.48	1.6086	1.51112	2.1108	2.11876	1.9584	2.676	2.56724	2.58476	3.03018	3.03077	3.00288	3.11553	3.1385	3.17333
5.22667	1.27627	1.349	1.35039	1.47543	1.60863	1.51448	2.11815	2.11795	1.96177	2.68023	2.5594	2.58436	3.02333	3.02696	3.00038	3.11926	3.13496	3.17464
5.23	1.27296	1.34866	1.35564	1.47185	1.61153	1.51023	2.1077	2.11304	1.9653	2.67906	2.55858	2.58217	3.01964	3.02706	2.9982	3.11603	3.13619	3.17213
5.23333	1.27502	1.34602	1.35297	1.47565	1.6097	1.51175	2.11387	2.12174	1.96157	2.67607	2.55787	2.58574	3.02029	3.02882	3.00193	3.11668	3.12945	3.1755
5.23667	1.27839	1.34715	1.35469	1.47422	1.61036	1.51241	2.1114	2.11527	1.96091	2.68004	2.56069	2.59045	3.02085	3.02438	2.99702	3.11648	3.13225	3.1721
5.24	1.27726	1.35073	1.35375	1.47303	1.60822	1.51369	2.11112	2.11839	1.95894	2.68006	2.55816	2.58031	3.0221	3.02543	2.99854	3.11765	3.13562	3.17111
5.24333	1.27556	1.34731	1.35178	1.47808	1.61032	1.50893	2.10914	2.11856	1.96481	2.67592	2.55773	2.58363	3.02127	3.02012	2.99865	3.11604	3.13346	3.17031
5.24667	1.2735	1.34462	1.35757	1.47763	1.6105	1.51157	2.11578	2.11326	1.96165	2.67593	2.55894	2.58544	3.02389	3.02387	2.99766	3.11596	3.13088	3.17317
5.25	1.26935	1.35094	1.35022	1.47409	1.61015	1.51124	2.10893	2.11492	1.95876	2.67725	2.55622	2.58256	3.0178	3.02302	3.00051	3.11222	3.13281	3.16748
5.25333	1.28049	1.34927	1.35303	1.4699	1.60845	1.50913	2.1033	2.11706	1.96042	2.67017	2.55823	2.58035	3.02865	3.02453	2.99887	3.11934	3.12873	3.16944
5.25667	1.2743	1.34854	1.35577	1.47208	1.60977	1.51365	2.10663	2.11606	1.96478	2.67801	2.55835	2.58324	3.01927	3.02796	3.00123	3.11275	3.13325	3.16844
5.26	1.28316	1.34954	1.35044	1.47629	1.60795	1.50628	2.11293	2.11216	1.95837	2.67394	2.56293	2.58925	3.01764	3.02531	2.99758	3.11692	3.12869	3.17174
5.26333	1.27624	1.34918	1.35488	1.47249	1.60902	1.50764	2.1147	2.11732	1.96253	2.67626	2.55797	2.58639	3.02338	3.02347	2.99974	3.1184	3.13661	3.17055
5.26667	1.28242	1.35087	1.34865	1.47382	1.60312	1.50845	2.11078	2.11802	1.96423	2.67762	2.56309	2.58967	3.01981	3.02509	2.99496	3.11322	3.13015	3.16891
5.27	1.27393	1.34969	1.35562	1.47256	1.61101	1.51152	2.11264	2.11689	1.96285	2.67688	2.55812	2.58624	3.02224	3.02564	2.99791	3.11097	3.13175	3.17105
5.27333	1.2797	1.34837	1.35338	1.4713	1.60953	1.51088	2.11099	2.11786	1.96495	2.68053	2.55624	2.58316	3.01805	3.02512	2.9984	3.1124	3.12681	3.17399
5.27667	1.27641	1.35066	1.35344	1.47478	1.61059	1.51432	2.11254	2.11307	1.9622	2.67833	2.56226	2.5852	3.01941	3.02673	2.9987	3.11594	3.13261	3.16731
5.28	1.27428	1.34907	1.355	1.47843	1.60879	1.5148	2.10698	2.11791	1.96095	2.67451	2.55595	2.58715	3.02172	3.02429	2.99683	3.11579	3.13106	3.16273
5.28333	1.27316	1.35172	1.35373	1.47878	1.61122	1.51388	2.10877	2.11744	1.95711	2.67403	2.56166	2.58884	3.02546	3.02614	3.00048	3.11056	3.13102	3.169
5.28667	1.27485	1.34984	1.35847	1.47263	1.6141	1.51086	2.10558	2.11263	1.96007	2.68273	2.55632	2.586	3.01748	3.02345	2.99203	3.1135	3.13236	3.16874
5.29	1.27643	1.34911	1.35196	1.47493	1.61126	1.51471	2.10941	2.11519	1.96042	2.67413	2.55668	2.5888	3.01869	3.023	2.99382	3.11255	3.12859	3.16523
5.29333	1.27723	1.34238	1.34997	1.47455	1.61045	1.51156	2.10798	2.11318	1.95586	2.67731	2.55805	2.57945	3.01939	3.02252	3.00148	3.11092	3.13025	3.16618
5.29667	1.27557	1.34984	1.35469	1.47523	1.60756	1.50855	2.11019	2.11621	1.96366	2.67062	2.55907	2.58293	3.02281	3.02692	2.99821	3.11153	3.13074	3.17131
5.3	1.27644	1.35323	1.35303	1.47626	1.61441	1.51732	2.11176	2.11876	1.9664	2.67916	2.55945	2.5834	3.01904	3.01761	2.99998	3.1099	3.12945	3.16828
5.30333	1.27441	1.34888	1.35461	1.4745	1.61523	1.51055	2.1086	2.11228	1.96378	2.67463	2.56094	2.57649	3.01859	3.02063	2.9963	3.11113	3.1275	3.17077
5.30667	1.27325	1.35291	1.35302	1.47436	1.60926	1.50999	2.11042	2.11729	1.96554	2.67539	2.55952	2.58159	3.01698	3.0217	2.99834	3.11696	3.12782	3.16846
5.31	1.28039	1.34866	1.35363	1.47208	1.61139	1.51474	2.11094	2.11216	1.95963	2.67749	2.5496	2.58264	3.01834	3.02604	2.99377	3.10988	3.12857	3.16898
5.31333	1.27394	1.35337	1.35033	1.4738	1.61014	1.5126	2.10742	2.1153	1.96139	2.67787	2.56065	2.58166	3.02218	3.0266	2.99377	3.11265	3.13527	3.1667
5.31667	1.27914	1.35539	1.35388	1.4768	1.61006	1.50933	2.10715	2.11622	1.96303	2.6753	2.55857	2.58259	3.01847	3.0235	2.99166	3.11398	3.12802	3.16541
5.32	1.27892	1.3472	1.35797	1.47463	1.61171	1.5142	2.11238	2.1199	1.96027	2.67634	2.55761	2.58377	3.01574	3.01861	2.99563	3.11019	3.12428	3.1648
5.32333	1.27579	1.34811	1.3571	1.47159	1.60876	1.51514	2.10968	2.11702	1.95953	2.67894	2.55261	2.58596	3.02239	3.02252	2.99829	3.10981	3.13529	3.16934
5.32667	1.27815	1.35118	1.35741	1.47479	1.60702	1.51539	2.11189	2.11813	1.96383	2.67513	2.55712	2.57858	3.02257	3.02135	2.99086	3.11173	3.12447	3.1654
5.33	1.28089	1.35126	1.357	1.4811	1.60844	1.51255	2.10954	2.11489	1.95895	2.66931	2.55507	2.58207	3.01846	3.021	2.9933	3.11079	3.12623	3.16623
5.33333	1.27521	1.3501	1.35775	1.48128	1.61116	1.50793	2.10587	2.11374	1.96063	2.66921	2.55634	2.58781	3.01632	3.02013	2.99414	3.11121	3.12557	3.1638
5.33667	1.27578	1.35089	1.35715	1.47686	1.60482	1.51868	2.10562	2.12461	1.96029	2.66942	2.55689	2.58625	3.01654	3.02283	2.99575	3.10691	3.13337	3.1657
5.34	1.27917	1.35353	1.35117	1.47049	1.61391	1.51579	2.10653	2.11655	1.96334	2.67394	2.56154	2.58152	3.01467	3.01897	2.99486	3.11069	3.12645	3.16953
5.34333	1.27392	1.35637	1.36057	1.46839	1.60794	1.50867	2.10503	2.11594	1.96267	2.67238	2.55231	2.58394	3.01397	3.02305	2.99853	3.1094	3.1262	3.16239
5.34667	1.2742	1.35143	1.35993	1.47387	1.61356	1.51558	2.10839	2.11839	1.96325	2.67246	2.56193	2.58289	3.01835	3.01825	2.99566	3.10675	3.12684	3.16759
5.35	1.2819	1.34921	1.35482	1.47236	1.61181	1.51313	2.10203	2.11633	1.96087	2.67499	2.55473	2.57973	3.01477	3.02216	2.99373	3.10678	3.12348	3.16637
5.35333	1.27818	1.34775	1.35753	1.47433	1.61225	1.51342	2.11143	2.11424	1.9645	2.67571	2.55609	2.58009	3.01496	3.02054	2.99673	3.11164	3.12828	3.17015
5.35667	1.27808	1.35319	1.35498	1.47387	1.61047	1.51349	2.10485	2.11801	1.95888	2.67288	2.56158	2.58313	3.01833	3.01746	2.99502	3.11044	3.13115	3.1679
5.36	1.27493	1.35518	1.35702	1.47305	1.60861	1.51035	2.10739	2.11349	1.95977	2.6757	2.55437	2.58127	3.01861	3.0197	2.99229	3.10897	3.12845	3.1734
5.36333	1.27466	1.3523	1.35545	1.47602	1.61089	1.50919	2.11103	2.11023	1.96337	2.67517	2.55783	2.58683	3.0176	3.02358	2.98856	3.11174	3.12801	3.16136
5.36667	1.2827	1.3502	1.35903	1.47653	1.60707	1.51384	2.10671	2.11271	1.96368	2.66795	2.55389	2.58164	3.01304	3.01404	2.99247	3.10546	3.12988	3.1651
5.37	1.27634	1.35039	1.35846	1.47373	1.611	1.51412	2.11036	2.11722	1.96077	2.66987	2.55783	2.58062	3.01877	3.015	2.99344	3.10641	3.12867	3.16558
5.37333	1.28103	1.35323	1.35703	1.46907	1.61511	1.51519	2.10399	2.11446	1.96016	2.67222	2.55457	2.58249	3.01399	3.02203	2.99226	3.10425	3.12479	3.16428
5.37667	1.27985	1.35546	1.35482	1.47317	1.60984	1.51487	2.10631	2.11806	1.96408	2.67082	2.55703	2.57689	3.01689	3.0154	2.99257	3.10926	3.13157	3.16031
5.38	1.28006	1.352	1.35614	1.47106	1.61075	1.51114	2.10732	2.11585	1.96026	2.67343	2.55277	2.57798	3.01783	3.01926	2.99159	3.10716	3.12729	3.16466
5.38333	1.27855	1.3575	1.35409	1.47247	1.61417	1.51567	2.10561	2.11295	1.96069	2.67294	2.56033	2.58162	3.01564	3.01195	2.99015	3.10542	3.12567	3.16569
5.38667	1.27115	1.35526	1.35667	1.47367	1.60972	1.51283	2.10385	2.11748	1.96516	2.67235	2.55074	2.57984	3.01639	3.01649	2.99447	3.10171	3.12501	3.17072
5.39	1.28079	1.35344	1.36198	1.47002	1.60889	1.51398	2.10864	2.11201	1.95867	2.6714	2.55531	2.58058	3.01344	3.01075	2.991	3.10705	3.12518	3.16501
5.39333	1.27884	1.35159	1.3622	1.47224	1.60977	1.51535	2.10697	2.11396	1.96145	2.6724	2.55608	2.58027	3.01561	3.01714	2.99259	3.10764	3.12514	3.16893
5.39667	1.27669	1.35248	1.35733	1.47492	1.61201	1.51474	2.10757	2.11299	1.9626	2.67416	2.55496	2.58148	3.0128	3.01795	2.98903	3.10393	3.12386	3.16646
5.4	1.27659	1.35184	1.35654	1.46725	1.61011	1.51999	2.10585	2.11211	1.96091	2.6705	2.55491	2.57771	3.01032	3.01461	2.98868	3.10405	3.1293	3.15935
5.40333	1.27557	1.35251	1.35654	1.47362	1.61349	1.51237	2.10642	2.11277	1.96417	2.67137	2.55676	2.58003	3.01283	3.01725	2.98955	3.1081	3.12428	3.16505
5.40667	1.273	1.35537	1.35745	1.47313	1.61628	1.51321	2.10537	2.1197	1.9609	2.67061	2.55764	2.58402	3.01352	3.00777	2.99066	3.10593	3.12878	3.1553
5.41	1.27623	1.35831	1.35789	1.47483	1.61331	1.52038	2.10405	2.11478	1.95884	2.6681	2.55375	2.57812	3.01535	3.01571	2.99615	3.10401	3.12278	3.16287
5.41333	1.27747	1.35276	1.35675	1.47005	1.61665	1.51382	2.10663	2.1172	1.9606	2.67215	2.55351	2.58364	3.01394	3.01575	2.99344	3.10161	3.12291	3.16011
5.41667	1.27422	1.35737	1.35946	1.47683	1.61088	1.50935	2.10501	2.11714	1.96088	2.6711	2.55526	2.58516	3.013	3.01815	2.99189	3.10522	3.11844	3.16023
5.42	1.2775	1.35665	1.35662	1.46947	1.6117	1.51134	2.10238	2.11223	1.95981	2.67081	2.55459	2.5806	3.00894	3.01073	2.99383	3.10435	3.12375	3.16584
5.42333	1.27967	1.35631	1.35914	1.47334	1.6135	1.5122	2.10903	2.11688	1.96127	2.67216	2.55613	2.57953	3.01146	3.01252	2.99349	3.10323	3.12444	3.15908
5.42667	1.27882	1.35488	1.35749	1.47882	1.61583	1.50984	2.10344	2.11459	1.96068	2.67022	2.55644	2.57567	3.01313	3.01455	2.98809	3.10351	3.12521	3.1556
5.43	1.27741	1.35545	1.36577	1.47402	1.61569	1.51404	2.10609	2.11335	1.96201	2.66924	2.55502	2.58115	3.01089	3.01359	2.99057	3.10491	3.12812	3.16124
5.43333	1.27828	1.35854	1.35655	1.47346	1.61367	1.51459	2.10251	2.11647	1.95695	2.67136	2.5535	2.58291	3.01002	3.01767	2.99533	3.10133	3.11822	3.16278
5.43667	1.28008	1.35325	1.35996	1.47167	1.61251	1.51849	2.10189	2.11515	1.96293	2.67093	2.55664	2.58041	3.00837	3.01548	2.98582	3.09751	3.11947	3.1604
5.44	1.28065	1.35332	1.35438	1.46837	1.61288	1.51292	2.10618	2.11898	1.96055	2.67226	2.55238	2.58152	3.01832	3.01047	2.98817	3.10169	3.12149	3.15923
5.44333	1.27475	1.35163	1.3584	1.47458	1.61184	1.5169	2.10342	2.1166	1.96031	2.6664	2.5534	2.5793	3.01217	3.01485	2.99022	3.10114	3.12331	3.15841
5.44667	1.27499	1.35775	1.36055	1.47301	1.61562	1.51258	2.10587	2.11563	1.96221	2.66702	2.55307	2.58412	3.01114	3.01877	2.98862	3.10068	3.12192	3.15998
5.45	1.27673	1.35497	1.36315	1.47128	1.61123	1.51383	2.10458	2.11931	1.95769	2.66796	2.5577	2.58016	3.01018	3.01706	2.98869	3.09839	3.1177	3.15584
5.45333	1.28094	1.35662	1.35901	1.4726	1.61012	1.51535	2.09918	2.11454	1.96333	2.67142	2.55768	2.57925	3.01328	3.01324	2.98931	3.10017	3.12503	3.16538
5.45667	1.27601	1.35256	1.35989	1.46949	1.60902	1.51485	2.10311	2.11913	1.96078	2.66907	2.56015	2.58268	3.00933	3.01388	2.9904	3.09967	3.11987	3.15508
5.46	1.27902	1.35764	1.36346	1.47108	1.61968	1.51732	2.10449	2.11977	1.95893	2.67126	2.56027	2.57502	3.01478	3.01331	2.98894	3.09985	3.11533	3.15765
5.46333	1.27615	1.35225	1.35964	1.47293	1.61459	1.51084	2.10306	2.11744	1.95564	2.67244	2.55893	2.57926	3.00849	3.01237	2.99466	3.10055	3.12257	3.16058
5.46667	1.28219	1.35114	1.35589	1.46807	1.61485	1.51852	2.10258	2.11692	1.9654	2.66874	2.55565	2.58138	3.008	3.01191	2.98935	3.09985	3.11439	3.15684
5.47	1.27758	1.35978	1.36123	1.47026	1.61438	1.51059	2.10548	2.11386	1.96545	2.67097	2.55901	2.57766	3.00866	3.01548	2.98761	3.09878	3.1254	3.15432
5.47333	1.27674	1.35536	1.36363	1.473	1.61229	1.51466	2.1036	2.1201	1.962	2.66594	2.55701	2.57772	3.01099	3.01185	2.98828	3.09589	3.12496	3.1603
5.47667	1.27585	1.35858	1.36184	1.47264	1.61425	1.51411	2.09877	2.11825	1.96486	2.67278	2.55628	2.57476	3.00732	3.01141	2.98931	3.09742	3.12353	3.15093
5.48	1.2783	1.35762	1.35684	1.4724	1.61047	1.51422	2.09938	2.11097	1.95681	2.66475	2.55567	2.57703	3.01162	3.00903	2.98571	3.09805	3.11936	3.15533
5.48333	1.28007	1.35339	1.36233	1.47121	1.6163	1.51143	2.10729	2.11396	1.96228	2.66944	2.55635	2.57453	3.00678	3.01319	2.99078	3.09814	3.11919	3.15624
5.48667	1.27932	1.35593	1.35828	1.46837	1.61463	1.51736	2.10262	2.11634	1.96436	2.66688	2.5539	2.57861	3.00915	3.01448	2.98769	3.09356	3.11711	3.15491
5.49	1.28046	1.35666	1.35861	1.47168	1.61509	1.51774	2.10721	2.11903	1.95681	2.67177	2.55331	2.57491	3.01226	3.0106	2.98639	3.09955	3.11853	3.15534
5.49333	1.27886	1.35043	1.36149	1.471	1.61433	1.51537	2.10277	2.11215	1.96077	2.66952	2.55537	2.57893	3.01254	3.01211	2.98394	3.10308	3.11658	3.15619
5.49667	1.28266	1.35653	1.35918	1.46921	1.61718	1.51671	2.10129	2.11238	1.9628	2.67241	2.55726	2.5754	3.0097	3.01277	2.98449	3.10004	3.12113	3.15543
5.5	1.26571	1.34346	1.34033	1.46229	1.56852	1.50497	2.09907	2.14802	1.98904	2.63054	2.56625	2.57801	2.90429	2.96192	2.94123	2.88551	3.00256	3.03174
5.50333	1.2362	1.32343	1.31413	1.43614	1.54075	1.4709	2.07265	2.12082	1.96007	2.60026	2.53151	2.55612	2.88001	2.93024	2.90674	2.85991	2.97382	3.0007
5.50667	1.21427	1.29313	1.28706	1.41359	1.51535	1.44606	2.0307	2.08401	1.926	2.56588	2.49926	2.52067	2.84682	2.89628	2.8848	2.83237	2.93957	2.97027
5.51	1.19451	1.27383	1.26242	1.38495	1.49466	1.42422	2.0046	2.05372	1.89768	2.53294	2.46928	2.49148	2.81653	2.8724	2.85057	2.80417	2.90978	2.9459
5.51333	1.18287	1.25736	1.24512	1.3571	1.46547	1.40196	1.97558	2.02934	1.8705	2.50092	2.43779	2.46089	2.78505	2.8432	2.82445	2.78179	2.89162	2.91529
5.51667	1.17059	1.23443	1.23401	1.34073	1.45206	1.38761	1.95231	1.99701	1.84539	2.47439	2.40966	2.42987	2.76118	2.81165	2.79863	2.76283	2.85832	2.89393
5.52	1.15231	1.21976	1.22251	1.31864	1.43346	1.36747	1.92697	1.96782	1.82225	2.44159	2.37391	2.39655	2.72935	2.78565	2.77054	2.73256	2.83593	2.86296
5.52333	1.14191	1.20899	1.20818	1.312	1.41983	1.34897	1.90755	1.94616	1.80423	2.41893	2.35095	2.37218	2.70519	2.75724	2.73855	2.70836	2.81317	2.84292
5.52667	1.13471	1.1912	1.19714	1.2928	1.40222	1.33306	1.8871	1.92426	1.78229	2.38746	2.32961	2.34646	2.67909	2.73476	2.71623	2.68425	2.79015	2.82034
5.53	1.12177	1.1868	1.18453	1.27658	1.3861	1.32616	1.86498	1.90452	1.76215	2.36571	2.30165	2.32686	2.65819	2.71306	2.69403	2.66435	2.76532	2.79929
5.53333	1.11121	1.17834	1.17817	1.26778	1.38126	1.31286	1.84712	1.88632	1.7467	2.34436	2.27868	2.30123	2.62651	2.68484	2.66971	2.64438	2.74391	2.77368
5.53667	1.10918	1.17185	1.17441	1.25888	1.37242	1.307	1.82661	1.87	1.73081	2.32195	2.2578	2.27956	2.60637	2.66341	2.65015	2.62343	2.72864	2.74947
5.54	1.09945	1.16215	1.16338	1.24019	1.35404	1.29347	1.81281	1.84996	1.71627	2.29433	2.23687	2.25123	2.58608	2.63368	2.6319	2.60774	2.70532	2.73455
5.54333	1.09211	1.15475	1.15651	1.23612	1.35064	1.28186	1.79786	1.83223	1.7031	2.27761	2.21592	2.23704	2.5643	2.62016	2.60665	2.57871	2.68639	2.70823
5.54667	1.09071	1.14497	1.15191	1.22625	1.33933	1.27515	1.78219	1.81767	1.68663	2.25506	2.1957	2.22073	2.54138	2.59681	2.59238	2.56715	2.66331	2.69344
5.55	1.08386	1.13805	1.14496	1.21779	1.32924	1.27392	1.76313	1.80106	1.67292	2.23675	2.17607	2.20122	2.5224	2.58005	2.5707	2.54426	2.64731	2.67707
5.55333	1.07709	1.13624	1.13989	1.21007	1.32685	1.26099	1.75614	1.7907	1.66273	2.21436	2.15538	2.1826	2.50129	2.55729	2.54929	2.52079	2.6277	2.65719
5.55667	1.07357	1.13213	1.13157	1.202	1.31872	1.25321	1.74322	1.77838	1.65409	2.20083	2.14549	2.16972	2.48585	2.54144	2.52882	2.50598	2.60381	2.63058
5.56	1.06675	1.12813	1.13018	1.19552	1.3112	1.24744	1.73001	1.76451	1.64525	2.18446	2.12112	2.15446	2.4639	2.51897	2.51212	2.48813	2.5943	2.61486
5.56333	1.06993	1.12647	1.12703	1.18903	1.30546	1.2337	1.71788	1.75476	1.6336	2.16981	2.10677	2.13417	2.44721	2.5012	2.49199	2.47424	2.57232	2.59893
5.56667	1.06028	1.11896	1.11858	1.18134	1.2987	1.23578	1.70705	1.74292	1.62141	2.14323	2.09532	2.11459	2.42745	2.48138	2.4743	2.45664	2.54896	2.58148
5.57	1.06124	1.1105	1.11625	1.17341	1.29166	1.2305	1.69457	1.73286	1.61255	2.1358	2.07186	2.09707	2.40832	2.46925	2.46443	2.43807	2.54064	2.56453
5.57333	1.0552	1.11173	1.1118	1.17014	1.28635	1.22337	1.68408	1.72322	1.60261	2.10911	2.06603	2.09001	2.39476	2.44325	2.44752	2.42051	2.5171	2.54991
5.57667	1.05288	1.10775	1.1098	1.15818	1.27883	1.22366	1.67759	1.70798	1.5938	2.09734	2.04855	2.07047	2.37692	2.43074	2.42796	2.40386	2.50562	2.52936
5.58	1.05069	1.10488	1.10626	1.1538	1.27195	1.2168	1.66293	1.69935	1.58378	2.08033	2.0332	2.05535	2.35986	2.4152	2.41263	2.3893	2.4891	2.51522
5.58333	1.03832	1.09722	1.10549	1.14572	1.27294	1.21056	1.6557	1.69032	1.57441	2.06321	2.02289	2.04622	2.34664	2.398	2.39276	2.37129	2.47589	2.50135
5.58667	1.04041	1.09624	1.09863	1.14518	1.26236	1.20506	1.64884	1.68269	1.56746	2.05503	2.00728	2.03473	2.32396	2.3832	2.3769	2.35445	2.44938	2.48013
5.59	1.03497	1.08747	1.09413	1.13763	1.25945	1.19958	1.63846	1.67263	1.56376	2.04281	1.98807	2.01967	2.31243	2.36585	2.36966	2.33875	2.43861	2.46641
5.59333	1.03604	1.08798	1.09171	1.13363	1.25663	1.19463	1.63088	1.66242	1.55137	2.02522	1.98264	2.00577	2.29624	2.34712	2.34875	2.31829	2.42187	2.45102
5.59667	1.0302	1.08524	1.08824	1.12959	1.24645	1.19056	1.6237	1.65241	1.54653	2.0117	1.96871	1.99679	2.27954	2.33631	2.33452	2.30768	2.40813	2.43188
5.6	1.02588	1.08595	1.08473	1.12174	1.24481	1.1845	1.61675	1.64553	1.53977	1.99783	1.95384	1.97917	2.26711	2.31798	2.31994	2.29433	2.39336	2.41785
5.60333	1.01989	1.07972	1.07678	1.11777	1.24065	1.17847	1.60295	1.63529	1.52754	1.98	1.94933	1.96949	2.24544	2.29898	2.31184	2.27855	2.3755	2.39893
5.60667	1.02071	1.07964	1.07642	1.1152	1.24057	1.16854	1.59516	1.63022	1.52345	1.97134	1.93032	1.95727	2.22927	2.28867	2.29345	2.25812	2.36414	2.38845
5.61	1.01653	1.07436	1.07434	1.10759	1.23367	1.17249	1.58516	1.62128	1.51322	1.95067	1.91863	1.94921	2.21897	2.27271	2.27604	2.24564	2.34536	2.37089
5.61333	1.01618	1.06434	1.07211	1.09681	1.22779	1.16698	1.58687	1.61193	1.50926	1.93938	1.90919	1.93532	2.20172	2.25984	2.26567	2.22836	2.33037	2.35843
5.61667	1.00922	1.06845	1.06759	1.09794	1.22297	1.16022	1.57412	1.60557	1.5029	1.93653	1.90192	1.92595	2.18677	2.24456	2.25418	2.21484	2.31644	2.34094
5.62	1.00912	1.0627	1.06386	1.09315	1.21866	1.15906	1.5631	1.59985	1.49793	1.92361	1.88425	1.91175	2.17279	2.2325	2.23537	2.20004	2.30386	2.32609
5.62333	1.01186	1.06167	1.05993	1.08869	1.2193	1.15231	1.55356	1.59393	1.4919	1.90277	1.88017	1.90219	2.162	2.21643	2.22182	2.18915	2.28715	2.3109
5.62667	1.00188	1.05743	1.06123	1.08661	1.20866	1.15509	1.55635	1.58358	1.48862	1.89088	1.8647	1.88955	2.14782	2.20428	2.20751	2.17005	2.27289	2.29629
5.63	1.00039	1.05132	1.05768	1.07811	1.21113	1.14316	1.53832	1.57367	1.48117	1.88384	1.85119	1.88224	2.13262	2.19133	2.19372	2.1598	2.25217	2.27883
5.63333	0.998622	1.049	1.05982	1.07848	1.20423	1.143	1.5331	1.56676	1.47407	1.86546	1.84341	1.87518	2.11935	2.17321	2.18635	2.14371	2.24191	2.26758
5.63667	0.996379	1.04952	1.05191	1.07058	1.20027	1.13534	1.52438	1.56087	1.46826	1.85452	1.83442	1.86207	2.10142	2.16564	2.17317	2.12653	2.22976	2.25259
5.64	0.995097	1.04682	1.0517	1.0613	1.19304	1.13413	1.51978	1.55269	1.46009	1.84312	1.8197	1.84947	2.0851	2.14687	2.16047	2.11286	2.21504	2.24429
5.64333	0.990626	1.04674	1.04573	1.06427	1.18945	1.12914	1.51589	1.54646	1.45368	1.83286	1.81096	1.84165	2.07039	2.13348	2.14547	2.10243	2.20048	2.22877
5.64667	0.983615	1.04371	1.03945	1.05972	1.18452	1.13123	1.50569	1.54157	1.44712	1.82437	1.80278	1.83485	2.06022	2.12363	2.13394	2.08757	2.18778	2.21281
5.65	0.984509	1.04055	1.03963	1.05389	1.18406	1.12266	1.49728	1.53262	1.44271	1.81368	1.79296	1.82468	2.04905	2.1111	2.12058	2.07047	2.17327	2.19552
5.65333	0.981305	1.03809	1.0401	1.04882	1.17745	1.11938	1.49143	1.52937	1.43524	1.7941	1.78392	1.81	2.03428	2.09458	2.11058	2.06072	2.16394	2.18777
5.65667	0.979845	1.03132	1.03791	1.0468	1.1786	1.11511	1.48785	1.52231	1.43492	1.7908	1.77413	1.80579	2.02408	2.08267	2.0958	2.04622	2.14681	2.17656
5.66	0.971269	1.03037	1.03944	1.03995	1.1748	1.1081	1.48266	1.51336	1.42677	1.77735	1.76326	1.79304	2.01352	2.07213	2.08223	2.03336	2.13436	2.16155
5.66333	0.971048	1.03004	1.03033	1.03372	1.16792	1.10696	1.47365	1.50768	1.41766	1.76285	1.75367	1.78105	1.99614	2.05979	2.06973	2.02435	2.12265	2.14192
5.66667	0.971242	1.02686	1.02527	1.03543	1.16892	1.10275	1.46431	1.49986	1.41441	1.75431	1.74775	1.76929	1.98638	2.04668	2.0602	2.00126	2.11048	2.13081
5.67	0.963653	1.02085	1.02551	1.02931	1.16197	1.09981	1.46106	1.496	1.41078	1.74353	1.74068	1.76239	1.97219	2.03297	2.04887	1.99016	2.10042	2.11888
5.67333	0.971284	1.02071	1.02398	1.02928	1.15848	1.10043	1.44714	1.48405	1.40477	1.72681	1.73029	1.75225	1.96454	2.01845	2.03842	1.97969	2.0816	2.10527
5.67667	0.966657	1.01532	1.02137	1.02439	1.15413	1.09285	1.44706	1.48397	1.39699	1.72004	1.7198	1.747	1.94948	2.00843	2.02439	1.96769	2.07035	2.09281
5.68	0.963438	1.01527	1.0164	1.02422	1.15147	1.09351	1.43677	1.47503	1.3953	1.7125	1.70977	1.74253	1.93637	1.99944	2.01959	1.95371	2.05737	2.08103
5.68333	0.956247	1.01365	1.01685	1.0189	1.14776	1.08633	1.43651	1.471	1.39005	1.70117	1.7004	1.73099	1.92442	1.9888	2.00292	1.94256	2.04314	2.06992
5.68667	0.956136	1.01435	1.01143	1.01052	1.14665	1.08344	1.42426	1.46906	1.38409	1.69572	1.69549	1.71854	1.9137	1.97655	1.99695	1.93026	2.03075	2.0536
5.69	0.945884	1.00546	1.00877	1.00735	1.14152	1.07923	1.42104	1.46239	1.38035	1.6837	1.68199	1.70711	1.90097	1.9643	1.98721	1.9159	2.02314	2.04473
5.69333	0.955751	1.00622	1.00858	1.00367	1.1431	1.07628	1.41429	1.45408	1.37624	1.67012	1.67147	1.70528	1.88896	1.9504	1.97301	1.90843	2.00877	2.02531
5.69667	0.949572	1.00365	1.00471	1.00112	1.13618	1.07429	1.40641	1.4497	1.36745	1.66308	1.66041	1.69436	1.88094	1.93639	1.96664	1.89402	1.99403	2.02023
5.7	0.944094	1.00358	1.00379	0.995098	1.13618	1.07071	1.40307	1.44007	1.36455	1.65045	1.65275	1.68352	1.86375	1.93251	1.94823	1.88524	1.98396	2.00505
5.70333	0.94851	0.998718	1.00263	0.989424	1.12519	1.06673	1.39712	1.44261	1.3599	1.63656	1.64877	1.67696	1.85143	1.9216	1.93989	1.86836	1.97325	1.99306
5.70667	0.942138	0.995241	0.99509	0.989055	1.12414	1.06208	1.38966	1.43189	1.34966	1.63023	1.6399	1.67254	1.83839	1.90339	1.92727	1.85632	1.95921	1.98373
5.71	0.940599	0.998956	0.997242	0.987144	1.12342	1.0621	1.37883	1.42607	1.34571	1.61641	1.63575	1.66282	1.83015	1.89116	1.92101	1.8512	1.94883	1.97295
5.71333	0.937155	0.995215	0.989027	0.977865	1.1231	1.05893	1.38109	1.4178	1.34299	1.61446	1.6271	1.65057	1.82065	1.88401	1.90905	1.83571	1.93884	1.95911
5.71667	0.935732	0.991838	0.996751	0.974334	1.11389	1.05973	1.36644	1.41512	1.33847	1.60392	1.61199	1.64366	1.80895	1.87608	1.89852	1.82371	1.92635	1.94294
5.72	0.933223	0.987785	0.98915	0.971478	1.11308	1.05136	1.36298	1.40895	1.33496	1.59519	1.60999	1.63756	1.79608	1.86511	1.88859	1.81146	1.90918	1.93506
5.72333	0.932497	0.986204	0.982573	0.969799	1.10835	1.05234	1.36444	1.39867	1.3319	1.58262	1.59639	1.62914	1.79027	1.85412	1.87801	1.79428	1.89637	1.92481
5.72667	0.931231	0.986054	0.98636	0.96895	1.10746	1.04869	1.35188	1.39635	1.32395	1.57353	1.59126	1.62172	1.77656	1.84828	1.87081	1.78969	1.89147	1.91222
5.73	0.932391	0.979884	0.981163	0.96638	1.10214	1.03843	1.34995	1.39158	1.31855	1.56501	1.57599	1.60919	1.76719	1.83514	1.86441	1.77865	1.87594	1.89866
5.73333	0.924807	0.980275	0.987048	0.960635	1.10079	1.03882	1.34284	1.38864	1.31539	1.5586	1.57671	1.60362	1.75797	1.82161	1.8456	1.76713	1.86208	1.88571
5.73667	0.920481	0.978956	0.97662	0.956725	1.09816	1.03881	1.34312	1.3813	1.30836	1.54737	1.56735	1.60199	1.74243	1.8127	1.83479	1.7544	1.85958	1.87384
5.74	0.919884	0.975222	0.97945	0.960248	1.09407	1.03449	1.33674	1.37437	1.30052	1.53705	1.56009	1.58888	1.73356	1.80086	1.82516	1.73887	1.85023	1.8716
5.74333	0.913678	0.977797	0.972271	0.950417	1.09601	1.03016	1.32559	1.37454	1.30199	1.52914	1.55079	1.5858	1.72461	1.79087	1.82311	1.73323	1.83543	1.85152
5.74667	0.916625	0.968432	0.970734	0.947433	1.0919	1.02885	1.32245	1.36731	1.29978	1.51937	1.54148	1.57842	1.71708	1.77659	1.80757	1.72247	1.82376	1.84565
5.75	0.914519	0.973114	0.970255	0.945538	1.07983	1.02655	1.3159	1.36228	1.29176	1.5137	1.53589	1.56588	1.70316	1.76932	1.80083	1.70913	1.81787	1.83164
5.75333	0.911969	0.966002	0.964676	0.940714	1.08303	1.02353	1.31465	1.35963	1.28724	1.50146	1.52528	1.55887	1.69214	1.75839	1.79025	1.70033	1.80081	1.82742
5.75667	0.910828	0.963099	0.962816	0.938202	1.07666	1.01994	1.31006	1.34828	1.282	1.49693	1.52291	1.55475	1.68019	1.75011	1.77559	1.69039	1.79499	1.81576
5.76	0.908547	0.964129	0.967038	0.934812	1.07431	1.01921	1.30005	1.34853	1.27716	1.48802	1.51118	1.54586	1.6725	1.74036	1.7686	1.68248	1.78	1.79957
5.76333	0.906128	0.965599	0.958782	0.933228	1.06842	1.01209	1.2956	1.34629	1.27231	1.47849	1.50363	1.54188	1.66402	1.72851	1.7613	1.66924	1.77625	1.79078
5.76667	0.907411	0.959496	0.96026	0.929933	1.07039	1.00923	1.29617	1.33372	1.26605	1.46733	1.5007	1.52694	1.65932	1.71507	1.74909	1.66604	1.75966	1.77983
5.77	0.901238	0.95653	0.961241	0.919218	1.06861	1.01161	1.28752	1.32849	1.26342	1.46407	1.49158	1.52212	1.64301	1.70643	1.74367	1.6493	1.74526	1.7674
5.77333	0.903144	0.956117	0.955362	0.922444	1.0671	1.01264	1.2832	1.32599	1.25992	1.45715	1.48756	1.51891	1.63153	1.69949	1.73463	1.6352	1.74073	1.75984
5.77667	0.90063	0.951823	0.949431	0.920378	1.06234	1.00016	1.27393	1.31928	1.25354	1.44258	1.47847	1.50358	1.61754	1.68871	1.72244	1.63138	1.73201	1.74908
5.78	0.895085	0.951909	0.951809	0.911982	1.06097	1.00122	1.27645	1.31795	1.25158	1.43699	1.46866	1.50297	1.61162	1.68158	1.71946	1.61653	1.71883	1.74178
5.78333	0.899603	0.9498	0.948609	0.917286	1.0565	0.997348	1.26998	1.31707	1.24333	1.42482	1.46365	1.49598	1.6061	1.67464	1.70634	1.60538	1.70583	1.73134
5.78667	0.894731	0.949342	0.947495	0.912107	1.05335	0.994236	1.26615	1.31079	1.24902	1.41799	1.45419	1.49309	1.59139	1.65771	1.69971	1.59499	1.70076	1.71968
5.79	0.886403	0.94409	0.948358	0.90418	1.05022	0.993131	1.25548	1.30249	1.23961	1.41113	1.4491	1.48174	1.58616	1.6538	1.69136	1.58726	1.68982	1.70681
5.79333	0.886501	0.946913	0.94397	0.904242	1.04549	0.988274	1.2508	1.29725	1.23537	1.4076	1.44293	1.47702	1.57465	1.64431	1.67678	1.57682	1.67895	1.6991
5.79667	0.887286	0.947658	0.937557	0.898633	1.04695	0.986403	1.24864	1.29481	1.22961	1.39708	1.43575	1.46705	1.56233	1.6365	1.67238	1.57127	1.66629	1.69023
5.8	0.882837	0.940792	0.939903	0.89384	1.04314	0.986819	1.24017	1.28232	1.23206	1.38524	1.42245	1.46063	1.55225	1.62385	1.66507	1.56209	1.66404	1.67868
5.80333	0.881856	0.937293	0.932872	0.895548	1.0416	0.97977	1.23207	1.28732	1.22237	1.38413	1.42128	1.45494	1.54299	1.61367	1.65537	1.55335	1.64922	1.66774
5.80667	0.881171	0.939334	0.93227	0.894704	1.04127	0.976392	1.23051	1.28131	1.2186	1.36888	1.41692	1.448	1.54155	1.60339	1.65096	1.54132	1.64397	1.65778
5.81	0.87967	0.934896	0.928391	0.892297	1.03592	0.979356	1.22966	1.27382	1.21421	1.36944	1.40604	1.4378	1.52931	1.59825	1.63534	1.53123	1.62953	1.6486
5.81333	0.880867	0.936407	0.930342	0.886411	1.02844	0.971067	1.22	1.27615	1.20832	1.36163	1.40023	1.43663	1.52352	1.59042	1.629	1.51413	1.62451	1.6423
5.81667	0.874352	0.932667	0.927061	0.879447	1.02648	0.967167	1.21971	1.26409	1.20905	1.35074	1.39299	1.4255	1.50827	1.58045	1.61842	1.50687	1.60979	1.63168
5.82	0.876322	0.9287	0.921336	0.880708	1.02569	0.969268	1.21347	1.25899	1.20401	1.34343	1.38406	1.42154	1.49886	1.57073	1.61435	1.50095	1.6044	1.6198
5.82333	0.871515	0.929677	0.927356	0.875318	1.01901	0.96417	1.21158	1.26035	1.19713	1.33511	1.37811	1.41758	1.49252	1.56254	1.60675	1.4875	1.58925	1.61484
5.82667	0.870916	0.930605	0.926086	0.878115	1.01578	0.964194	1.20278	1.25293	1.19455	1.32532	1.377	1.40934	1.48365	1.55393	1.59412	1.48368	1.58431	1.59963
5.83	0.868553	0.922957	0.920565	0.869884	1.01712	0.967382	1.2002	1.25104	1.2006	1.32163	1.36371	1.39838	1.46931	1.54553	1.58986	1.47807	1.575	1.5958
5.83333	0.86685	0.923557	0.924359	0.868953	1.01632	0.96166	1.19083	1.24078	1.19175	1.30907	1.36198	1.39783	1.46911	1.53892	1.57977	1.46305	1.56869	1.58982
5.83667	0.866857	0.920117	0.919589	0.865488	1.00821	0.954204	1.19004	1.24362	1.18829	1.30671	1.3537	1.39264	1.46166	1.5284	1.57054	1.45612	1.55384	1.57756
5.84	0.861105	0.920359	0.91398	0.866501	1.01126	0.954051	1.18772	1.23339	1.18264	1.29801	1.34619	1.38042	1.4521	1.5163	1.56807	1.44656	1.54955	1.56944
5.84333	0.865643	0.918364	0.914909	0.859099	1.00556	0.948819	1.18011	1.22874	1.17827	1.29249	1.33759	1.37642	1.44121	1.50966	1.55353	1.43721	1.53581	1.55815
5.84667	0.86699	0.919307	0.911486	0.860201	1.0138	0.943505	1.17944	1.23207	1.17549	1.28286	1.33632	1.37686	1.43018	1.50204	1.54444	1.42782	1.53103	1.54611
5.85	0.864666	0.917553	0.909041	0.851435	1.00577	0.940441	1.17066	1.22126	1.17331	1.27544	1.33063	1.3638	1.42735	1.5006	1.54273	1.42135	1.51778	1.53969
5.85333	0.851639	0.910771	0.911996	0.853067	1.0028	0.941629	1.1715	1.21371	1.16491	1.26791	1.32279	1.35378	1.4217	1.48904	1.53393	1.40886	1.50456	1.53115
5.85667	0.855371	0.908119	0.90529	0.848083	1.00358	0.94259	1.1632	1.21355	1.15756	1.26039	1.31695	1.35817	1.40776	1.48071	1.52466	1.40193	1.50153	1.52074
5.86	0.857593	0.906321	0.905169	0.848809	1.00017	0.937684	1.15331	1.2026	1.15771	1.25809	1.30862	1.34861	1.39611	1.46709	1.51875	1.39957	1.49537	1.51701
5.86333	0.847219	0.909765	0.907779	0.841936	0.999822	0.933969	1.1518	1.20772	1.15657	1.24302	1.30268	1.34274	1.39392	1.46085	1.50572	1.38684	1.48721	1.50757
5.86667	0.850759	0.906877	0.905615	0.841398	0.991098	0.935939	1.15421	1.19851	1.15087	1.24295	1.29228	1.33995	1.38268	1.45528	1.49838	1.37164	1.47825	1.49845
5.87	0.852879	0.90717	0.90193	0.833493	0.988398	0.932651	1.14931	1.20101	1.1474	1.23321	1.28934	1.33062	1.37554	1.4423	1.49082	1.36627	1.46806	1.48757
5.87333	0.850477	0.903518	0.898935	0.835194	0.990158	0.926535	1.13977	1.19629	1.14465	1.22988	1.28675	1.32905	1.36969	1.44226	1.48644	1.35773	1.46358	1.48088
5.87667	0.845004	0.903204	0.895867	0.834572	0.982537	0.92406	1.13687	1.19049	1.14265	1.22205	1.28184	1.31785	1.36183	1.4261	1.48085	1.35354	1.45037	1.46778
5.88	0.843388	0.898112	0.902857	0.829302	0.981697	0.924224	1.13395	1.18787	1.13533	1.21444	1.27272	1.31943	1.35308	1.42188	1.47302	1.3427	1.44001	1.46722
5.88333	0.844645	0.898347	0.895518	0.831965	0.98631	0.924635	1.12738	1.18408	1.1334	1.20946	1.26667	1.30667	1.34526	1.41744	1.46799	1.33379	1.43444	1.45416
5.88667	0.844234	0.896989	0.896503	0.828356	0.97257	0.919052	1.12674	1.17521	1.12877	1.19856	1.26359	1.29609	1.34175	1.40927	1.45664	1.32362	1.43111	1.44721
5.89	0.848278	0.897869	0.892924	0.823095	0.975469	0.91748	1.12054	1.17102	1.13172	1.19823	1.26283	1.29419	1.32675	1.40216	1.44743	1.31611	1.41783	1.4345
5.89333	0.847054	0.89177	0.886054	0.821433	0.974307	0.916628	1.11529	1.17065	1.12155	1.19048	1.25672	1.29201	1.31957	1.39098	1.43539	1.30645	1.40773	1.43078
5.89667	0.832976	0.889429	0.887951	0.821633	0.974862	0.913264	1.1096	1.16232	1.11505	1.18586	1.25005	1.28618	1.31294	1.38264	1.43657	1.30242	1.40119	1.421
5.9	0.833306	0.891194	0.885368	0.812653	0.971846	0.911613	1.11124	1.1579	1.1169	1.17165	1.24315	1.28172	1.30511	1.37554	1.42898	1.2927	1.39369	1.41117
5.90333	0.835043	0.889174	0.883612	0.820255	0.969123	0.906679	1.10799	1.15477	1.11521	1.16915	1.23626	1.27743	1.29573	1.36894	1.42021	1.2842	1.38722	1.40356
5.90667	0.832765	0.889413	0.880152	0.809311	0.962898	0.909114	1.1026	1.15187	1.10737	1.16512	1.22457	1.27083	1.29278	1.35732	1.41397	1.27641	1.37961	1.39982
5.91	0.836128	0.883242	0.884557	0.812775	0.962891	0.906702	1.09611	1.14879	1.11198	1.15485	1.22281	1.26239	1.2863	1.35437	1.40604	1.27325	1.37556	1.38804
5.91333	0.831375	0.882519	0.8793	0.808195	0.963579	0.90269	1.0945	1.14691	1.09933	1.1476	1.22354	1.26289	1.27229	1.34069	1.39877	1.26114	1.36524	1.38251
5.91667	0.83017	0.883676	0.879094	0.807676	0.964706	0.902959	1.08742	1.13852	1.10477	1.14856	1.21477	1.25337	1.27039	1.34116	1.39239	1.25604	1.36168	1.37818
5.92	0.824385	0.884171	0.878637	0.805953	0.954968	0.899706	1.0868	1.14048	1.09502	1.13655	1.20877	1.25178	1.25941	1.33029	1.38463	1.2462	1.3469	1.36477
5.92333	0.823575	0.880966	0.875996	0.804242	0.955042	0.898536	1.08364	1.1332	1.09351	1.12983	1.20414	1.2397	1.25379	1.3252	1.3812	1.23799	1.34323	1.35757
5.92667	0.82305	0.875681	0.877604	0.802189	0.950715	0.891798	1.07842	1.13123	1.09278	1.12404	1.19635	1.23481	1.24445	1.31599	1.37184	1.23147	1.33194	1.35228
5.93	0.825138	0.877786	0.873817	0.798381	0.946138	0.890291	1.07554	1.12866	1.08103	1.12298	1.1955	1.22991	1.23696	1.31027	1.3655	1.22886	1.32894	1.33975
5.93333	0.823698	0.875767	0.869766	0.792492	0.941748	0.891552	1.06743	1.12739	1.08723	1.11461	1.18497	1.2274	1.23372	1.3071	1.36257	1.21899	1.31962	1.33575
5.93667	0.816465	0.874069	0.869248	0.790787	0.948329	0.892932	1.06981	1.12075	1.08123	1.1073	1.18211	1.21877	1.22052	1.29274	1.35256	1.21256	1.31291	1.32886
5.94	0.820592	0.870044	0.86677	0.790722	0.943506	0.889718	1.06801	1.11342	1.07759	1.10321	1.17613	1.21609	1.21707	1.29066	1.34182	1.20061	1.30091	1.32181
5.94333	0.809619	0.86966	0.867614	0.789424	0.944568	0.885499	1.06123	1.1126	1.07411	1.09769	1.17181	1.21196	1.20551	1.27754	1.33988	1.19559	1.29427	1.30878
5.94667	0.818703	0.872643	0.864974	0.781488	0.938132	0.878837	1.05875	1.11088	1.06637	1.08591	1.16586	1.21005	1.20219	1.27767	1.33202	1.18764	1.28734	1.30591
5.95	0.815634	0.867768	0.867672	0.78625	0.937535	0.881456	1.05401	1.10511	1.06861	1.08319	1.16429	1.20856	1.19415	1.26524	1.33035	1.18236	1.27784	1.29874
5.95333	0.814273	0.866892	0.862146	0.777983	0.935909	0.881196	1.05001	1.10145	1.06531	1.0826	1.15946	1.19513	1.18347	1.25777	1.31894	1.17746	1.27118	1.29449
5.95667	0.81954	0.869074	0.865834	0.777566	0.941687	0.878213	1.04696	1.10583	1.05953	1.07154	1.14562	1.19767	1.18299	1.25131	1.31454	1.16535	1.2668	1.28855
5.96	0.811157	0.865652	0.860779	0.776461	0.935061	0.87424	1.04099	1.0927	1.06207	1.0717	1.14518	1.18661	1.1739	1.24403	1.3093	1.15974	1.25923	1.27123
5.96333	0.807508	0.865583	0.858967	0.775491	0.932335	0.870234	1.03959	1.09526	1.05985	1.06393	1.13927	1.18448	1.1637	1.24559	1.29847	1.14971	1.2566	1.2666
5.96667	0.807628	0.864791	0.856232	0.771256	0.925576	0.867861	1.03577	1.08614	1.04917	1.05771	1.13556	1.1734	1.16239	1.23029	1.29321	1.14926	1.24153	1.2638
5.97	0.808767	0.858193	0.858981	0.771859	0.928517	0.867385	1.03057	1.08918	1.05085	1.05495	1.12856	1.16741	1.15265	1.22677	1.2895	1.13742	1.23658	1.2548
5.97333	0.800011	0.860542	0.853441	0.769069	0.924946	0.870234	1.02738	1.08193	1.0463	1.04416	1.11997	1.16191	1.14844	1.22296	1.28108	1.12819	1.23246	1.24267
5.97667	0.805241	0.860451	0.851042	0.765949	0.919824	0.867397	1.02842	1.08193	1.03632	1.03711	1.12165	1.16721	1.13826	1.21443	1.2759	1.11963	1.21919	1.23963
5.98	0.800464	0.853973	0.854562	0.766748	0.915914	0.863041	1.02684	1.07635	1.04233	1.02985	1.11138	1.15883	1.13687	1.20822	1.27318	1.11398	1.2181	1.23361
5.98333	0.798671	0.858044	0.847377	0.761988	0.917026	0.860079	1.0191	1.07227	1.03789	1.02552	1.10978	1.15566	1.12152	1.19872	1.26546	1.10976	1.21039	1.22597
5.98667	0.801282	0.851802	0.845437	0.763177	0.917048	0.862216	1.01702	1.07433	1.03169	1.02283	1.10512	1.14794	1.11405	1.19441	1.25569	1.10499	1.20074	1.21918
5.99	0.800701	0.855048	0.851636	0.759408	0.914211	0.861547	1.01493	1.06536	1.0308	1.01668	1.10476	1.13979	1.11464	1.18957	1.25168	1.09477	1.1972	1.21273
5.99333	0.800049	0.856286	0.85082	0.758606	0.915075	0.852138	1.00634	1.0642	1.02943	1.00928	1.09511	1.13879	1.10711	1.18218	1.24483	1.09261	1.19199	1.20651
5.99667	0.796146	0.848405	0.846126	0.754222	0.913563	0.852656	1.0038	1.0602	1.03153	1.00553	1.09597	1.13665	1.10374	1.17534	1.239	1.08513	1.18315	1.19649
6	0.793603	0.848887	0.845816	0.754379	0.91002	0.854466	1.00154	1.05262	1.02693	0.998808	1.09078	1.13087	1.09616	1.17202	1.23374	1.08222	1.17962	1.19897
6.00333	0.790988	0.847502	0.841337	0.74853	0.907381	0.854957	0.995667	1.04991	1.01648	0.998488	1.08119	1.12306	1.09079	1.16049	1.23274	1.0697	1.17466	1.18309
6.00667	0.793123	0.850013	0.836792	0.746447	0.909785	0.84928	0.999851	1.04663	1.01987	0.985966	1.08003	1.12157	1.07825	1.15383	1.22299	1.0647	1.16333	1.18011
6.01	0.790803	0.845836	0.837375	0.746909	0.903945	0.845273	0.989501	1.04641	1.01718	0.983747	1.07649	1.1155	1.07943	1.15211	1.2209	1.0586	1.15654	1.1717
6.01333	0.789457	0.84574	0.839683	0.746302	0.903339	0.841827	0.9835	1.04375	1.01266	0.981024	1.06791	1.11045	1.07131	1.14373	1.21036	1.0513	1.14945	1.1633
6.01667	0.793503	0.842991	0.83334	0.742623	0.90568	0.84261	0.98496	1.04324	1.01456	0.975757	1.06568	1.11069	1.06467	1.13717	1.20132	1.04066	1.14556	1.15836
6.02	0.787945	0.83982	0.839261	0.744248	0.899215	0.844232	0.989612	1.03482	1.00558	0.968375	1.05853	1.10181	1.05741	1.13055	1.19915	1.04006	1.13256	1.15119
6.02333	0.788138	0.843508	0.833021	0.736412	0.898815	0.83499	0.972802	1.03483	1.00021	0.967593	1.05445	1.09738	1.0526	1.12692	1.19533	1.03056	1.12738	1.14527
6.02667	0.783577	0.838976	0.833532	0.734087	0.895356	0.836539	0.976116	1.0286	1.00021	0.962981	1.05315	1.09388	1.04984	1.12056	1.18415	1.02627	1.12345	1.14064
6.03	0.786057	0.834999	0.833159	0.729814	0.894332	0.834163	0.974003	1.02706	0.994572	0.952575	1.0433	1.09407	1.0399	1.11722	1.17905	1.01982	1.11573	1.13205
6.03333	0.784513	0.831332	0.826086	0.732415	0.890266	0.833205	0.966078	1.02668	0.991984	0.94814	1.03893	1.08684	1.03156	1.10748	1.17551	1.01664	1.1109	1.1281
6.03667	0.781054	0.831535	0.828403	0.734734	0.889378	0.833634	0.966218	1.01782	0.997071	0.943031	1.03578	1.08049	1.0289	1.1041	1.17145	1.00646	1.10469	1.11443
6.04	0.777452	0.834272	0.828233	0.725213	0.88319	0.830854	0.967455	1.01522	0.991354	0.937372	1.03111	1.07311	1.02478	1.09753	1.16444	0.999548	1.09899	1.1204
6.04333	0.780645	0.839968	0.827254	0.733018	0.889701	0.827097	0.963114	1.01557	0.984197	0.93203	1.025	1.06905	1.01858	1.08457	1.15849	0.99656	1.09247	1.1101
6.04667	0.777713	0.825675	0.826867	0.720241	0.887943	0.825331	0.957732	1.01484	0.986547	0.928275	1.02175	1.06821	1.00742	1.08847	1.15057	0.984232	1.08606	1.10597
6.05	0.782598	0.827684	0.824522	0.726456	0.882587	0.825996	0.955274	1.00584	0.983743	0.925018	1.01764	1.06046	1.00023	1.07818	1.14633	0.981304	1.07966	1.09534
6.05333	0.771371	0.83004	0.818879	0.726975	0.88199	0.823909	0.952016	1.0059	0.979739	0.919674	1.01319	1.05955	0.998055	1.0752	1.14336	0.974599	1.07554	1.09309
6.05667	0.77848	0.828568	0.819377	0.720827	0.87429	0.822241	0.945026	1.00555	0.977048	0.912827	1.00914	1.05747	0.993212	1.06711	1.13587	0.969402	1.06613	1.08299
6.06	0.774603	0.827549	0.817691	0.716269	0.879571	0.817233	0.941096	1.00182	0.977288	0.906031	1.00144	1.04415	0.984388	1.05836	1.13095	0.962446	1.06441	1.0714
6.06333	0.777321	0.823629	0.816741	0.717355	0.87375	0.81815	0.940695	0.993642	0.97332	0.903359	0.998893	1.05122	0.986761	1.05887	1.1276	0.958832	1.05432	1.07316
6.06667	0.769825	0.82515	0.819454	0.718114	0.874774	0.814882	0.937237	0.995989	0.966211	0.900187	0.992048	1.04404	0.975143	1.0499	1.11809	0.948146	1.04924	1.06445
6.07	0.775323	0.821604	0.815019	0.712076	0.870354	0.814943	0.937678	0.988654	0.968431	0.896696	0.990833	1.03428	0.971298	1.04503	1.11639	0.943487	1.04457	1.05986
6.07333	0.772774	0.823774	0.815391	0.708754	0.869227	0.812531	0.934319	0.984851	0.958817	0.890897	0.991571	1.03598	0.969306	1.03896	1.11075	0.936246	1.03735	1.05432
6.07667	0.765031	0.821699	0.812873	0.706572	0.867023	0.812169	0.934938	0.98421	0.958914	0.88732	0.987695	1.03693	0.960285	1.03248	1.10467	0.936825	1.03373	1.04701
6.08	0.769876	0.817348	0.809296	0.708982	0.86883	0.80973	0.923887	0.983425	0.959686	0.878531	0.98151	1.03043	0.952508	1.0281	1.09774	0.930499	1.02907	1.04538
6.08333	0.768017	0.81904	0.818367	0.702939	0.86718	0.805048	0.923681	0.983277	0.955196	0.878372	0.975406	1.02077	0.949964	1.02414	1.09583	0.924253	1.0233	1.03382
6.08667	0.767402	0.817566	0.815738	0.704195	0.864279	0.807053	0.927088	0.982684	0.9553	0.872746	0.973534	1.02171	0.941636	1.01558	1.09159	0.915174	1.01763	1.03071
6.09	0.764206	0.813016	0.815243	0.708118	0.863359	0.806437	0.914538	0.972772	0.951712	0.866268	0.966309	1.01727	0.935304	1.00691	1.081	0.910175	1.00764	1.0188
6.09333	0.76521	0.81431	0.806036	0.700787	0.862658	0.807047	0.914722	0.971029	0.952498	0.863141	0.963164	1.01132	0.933353	1.00778	1.07751	0.905033	1.00654	1.02087
6.09667	0.760351	0.814211	0.807717	0.698583	0.861609	0.802845	0.912264	0.971719	0.942492	0.85958	0.960741	1.00756	0.92462	0.999775	1.07716	0.900512	0.999296	1.01644
6.1	0.762527	0.812752	0.809633	0.695623	0.858825	0.800881	0.910706	0.969653	0.942758	0.858304	0.950294	1.00358	0.921178	0.990298	1.06631	0.894694	0.988865	1.005
6.10333	0.761938	0.815606	0.809427	0.695088	0.857924	0.798846	0.904622	0.9623	0.941897	0.847392	0.951859	0.998777	0.917709	0.993002	1.06545	0.892776	0.987018	1.00424
6.10667	0.758252	0.810147	0.802355	0.694312	0.855069	0.794188	0.903319	0.961139	0.935549	0.849145	0.949924	0.994157	0.906875	0.98278	1.05955	0.886299	0.976403	0.996428
6.11	0.757468	0.809843	0.80182	0.694164	0.853461	0.79687	0.900589	0.957609	0.939933	0.839488	0.940337	0.993935	0.90261	0.981518	1.05272	0.881858	0.97467	0.9884
6.11333	0.756302	0.809174	0.804899	0.687019	0.855911	0.792416	0.900762	0.955299	0.933154	0.835643	0.942492	0.985773	0.89601	0.973495	1.04753	0.875239	0.968883	0.984294
6.11667	0.75345	0.808244	0.803842	0.692014	0.84977	0.79093	0.894991	0.951711	0.928487	0.832177	0.934662	0.985341	0.893621	0.970634	1.04016	0.865257	0.963735	0.975832
6.12	0.7534	0.809953	0.800773	0.68425	0.848231	0.787198	0.894213	0.950659	0.93082	0.82406	0.931184	0.982919	0.890847	0.961213	1.04021	0.861802	0.962743	0.979012
6.12333	0.756806	0.807492	0.798149	0.68807	0.847485	0.790289	0.8891	0.944193	0.924325	0.824161	0.926076	0.977192	0.881151	0.959528	1.03028	0.859688	0.954051	0.968729
6.12667	0.754502	0.807129	0.798438	0.67911	0.849524	0.792849	0.886456	0.950292	0.924439	0.818274	0.926243	0.971148	0.874259	0.955745	1.03209	0.847263	0.946606	0.964617
6.13	0.745911	0.802394	0.796028	0.687031	0.845257	0.782877	0.885724	0.941162	0.922589	0.816064	0.91973	0.974143	0.873145	0.9488	1.02529	0.850471	0.946957	0.959414
6.13333	0.749107	0.804181	0.792084	0.680196	0.841544	0.78389	0.87989	0.939983	0.916267	0.805937	0.922016	0.967987	0.865593	0.939996	1.0181	0.841511	0.939451	0.953638
6.13667	0.750849	0.80683	0.793922	0.677808	0.843337	0.784657	0.880765	0.934525	0.915326	0.80218	0.916384	0.961507	0.86384	0.937963	1.01174	0.833571	0.933599	0.948193
6.14	0.75256	0.803653	0.792387	0.678535	0.84454	0.78646	0.878079	0.933702	0.913356	0.799796	0.908985	0.954063	0.854521	0.934916	1.00948	0.826072	0.92264	0.942359
6.14333	0.751536	0.799239	0.792072	0.67687	0.839662	0.784922	0.871605	0.926004	0.911325	0.794099	0.90746	0.958502	0.854259	0.925459	1.00036	0.827018	0.916135	0.936312
6.14667	0.743861	0.798875	0.791056	0.679906	0.84144	0.779645	0.872327	0.923403	0.910049	0.791638	0.898187	0.951983	0.852427	0.925029	1.00012	0.82151	0.91502	0.931509
6.15	0.745904	0.79798	0.793476	0.672896	0.837498	0.780848	0.866897	0.928739	0.907462	0.789935	0.897483	0.946862	0.841471	0.91805	0.993513	0.816907	0.910701	0.929008
6.15333	0.744874	0.800657	0.791715	0.673583	0.835273	0.778392	0.865402	0.924728	0.905385	0.782994	0.89535	0.945714	0.831607	0.914317	0.992599	0.802947	0.904752	0.922445
6.15667	0.745995	0.794318	0.786104	0.671714	0.833821	0.774389	0.865561	0.919244	0.901786	0.776859	0.888428	0.943378	0.835273	0.911909	0.988842	0.804679	0.899925	0.916963
6.16	0.737723	0.798924	0.787681	0.670903	0.830676	0.77451	0.863212	0.917514	0.89513	0.774017	0.88474	0.937424	0.830462	0.904925	0.979066	0.799147	0.895837	0.910078
6.16333	0.736626	0.792279	0.786538	0.663325	0.828637	0.769261	0.860728	0.919034	0.895704	0.773088	0.88378	0.93714	0.823942	0.896486	0.979157	0.788617	0.89007	0.901885
6.16667	0.738959	0.792898	0.784116	0.6664	0.826781	0.76894	0.859715	0.913437	0.895699	0.770939	0.880112	0.925369	0.816703	0.8927	0.973571	0.790052	0.88523	0.901387
6.17	0.738668	0.789943	0.782639	0.661937	0.826981	0.771623	0.853567	0.911699	0.895822	0.765323	0.879238	0.927674	0.813443	0.893844	0.96542	0.77834	0.877791	0.894045
6.17333	0.739594	0.793203	0.782131	0.660016	0.820081	0.765138	0.84823	0.910789	0.889993	0.757999	0.871419	0.923024	0.809368	0.884003	0.964413	0.777526	0.875285	0.89013
6.17667	0.740213	0.788284	0.783704	0.66199	0.824591	0.766485	0.848014	0.907662	0.896008	0.760124	0.866672	0.922499	0.803426	0.883136	0.96323	0.775888	0.868711	0.884374
6.18	0.731767	0.790043	0.784862	0.655499	0.81843	0.767489	0.848373	0.902554	0.881547	0.75536	0.86529	0.920745	0.800627	0.875358	0.959129	0.770823	0.866363	0.8795
6.18333	0.734212	0.791092	0.778043	0.654944	0.825372	0.768497	0.842225	0.902017	0.881895	0.749101	0.863419	0.913027	0.79409	0.86794	0.95475	0.762259	0.863182	0.877665
6.18667	0.740415	0.786839	0.783765	0.658451	0.821676	0.764338	0.839241	0.900707	0.885643	0.74374	0.858269	0.910951	0.78817	0.867551	0.944008	0.761514	0.851843	0.87325
6.19	0.735009	0.78914	0.780095	0.658451	0.81723	0.762597	0.838066	0.898571	0.883564	0.742117	0.857111	0.908386	0.786132	0.865885	0.944189	0.752029	0.849907	0.866822
6.19333	0.733396	0.782889	0.777924	0.652232	0.820727	0.759184	0.837572	0.894855	0.882395	0.733919	0.853032	0.901066	0.780229	0.85637	0.938802	0.753452	0.845725	0.856372
6.19667	0.729303	0.783039	0.775775	0.655944	0.817222	0.761483	0.836568	0.890696	0.881088	0.734647	0.843625	0.901477	0.777413	0.852323	0.933118	0.748064	0.841159	0.852918
6.2	0.727706	0.785018	0.771791	0.655139	0.818378	0.76158	0.832778	0.892406	0.877319	0.726796	0.844112	0.896008	0.773561	0.849579	0.926819	0.743996	0.835977	0.853129
6.20333	0.731058	0.779737	0.772791	0.648118	0.816434	0.762671	0.828084	0.892358	0.872664	0.72692	0.838669	0.893967	0.765475	0.843468	0.925639	0.739918	0.829934	0.845859
6.20667	0.729969	0.780558	0.773971	0.649636	0.810432	0.755397	0.825468	0.880777	0.872352	0.721547	0.836577	0.888382	0.76413	0.836646	0.917629	0.731136	0.82189	0.839769
6.21	0.731818	0.781919	0.771599	0.644537	0.813908	0.755346	0.823043	0.882476	0.867715	0.717788	0.835323	0.883275	0.763365	0.834553	0.916792	0.730932	0.819786	0.841182
6.21333	0.7296	0.780079	0.772506	0.646591	0.807753	0.749874	0.824533	0.879651	0.863458	0.721538	0.828956	0.881117	0.75246	0.830869	0.913004	0.718886	0.816926	0.836324
6.21667	0.724664	0.776226	0.770118	0.645186	0.807174	0.75318	0.821699	0.875667	0.866235	0.71107	0.828021	0.877798	0.74533	0.827159	0.904395	0.713923	0.814421	0.827287
6.22	0.73463	0.773946	0.771011	0.641746	0.80951	0.747892	0.820342	0.875052	0.865439	0.705517	0.82255	0.877796	0.74213	0.821377	0.90563	0.711218	0.805429	0.823486
6.22333	0.7252	0.776416	0.775154	0.635287	0.805424	0.750071	0.814797	0.87549	0.855719	0.704262	0.818683	0.874266	0.735662	0.816416	0.899815	0.707207	0.80347	0.820362
6.22667	0.72383	0.774358	0.764612	0.63576	0.805008	0.744133	0.809539	0.873562	0.862204	0.695747	0.817249	0.86835	0.733912	0.813226	0.894286	0.702226	0.797495	0.812822
6.23	0.7225	0.774443	0.769902	0.63766	0.804094	0.748097	0.806325	0.863861	0.855839	0.699616	0.819192	0.864422	0.728487	0.806077	0.889005	0.702176	0.79213	0.808266
6.23333	0.723757	0.77307	0.767384	0.633643	0.801028	0.748402	0.804721	0.867464	0.854956	0.69438	0.809702	0.865318	0.72867	0.802141	0.886729	0.692043	0.790828	0.805857
6.23667	0.722882	0.777349	0.764205	0.635398	0.80051	0.743332	0.808321	0.861994	0.855317	0.689828	0.809734	0.858833	0.716615	0.797469	0.878673	0.687735	0.77968	0.7954
6.24	0.726139	0.775891	0.76248	0.632998	0.799154	0.740605	0.807967	0.860894	0.849141	0.686739	0.805796	0.854881	0.720502	0.792821	0.880698	0.686625	0.776231	0.797572
6.24333	0.727703	0.771957	0.762965	0.634703	0.797847	0.738754	0.801641	0.860022	0.841871	0.683388	0.802265	0.852977	0.710668	0.790863	0.872622	0.681112	0.77621	0.79165
6.24667	0.71776	0.768845	0.760695	0.626401	0.795166	0.743181	0.797827	0.858422	0.843812	0.677181	0.801708	0.85112	0.710988	0.784719	0.869639	0.676337	0.769481	0.788556
6.25	0.723235	0.769135	0.764153	0.628095	0.795574	0.739736	0.79755	0.854342	0.841769	0.677731	0.793475	0.851192	0.705776	0.782102	0.863301	0.674028	0.766062	0.784185
6.25333	0.721008	0.769241	0.759617	0.628705	0.79941	0.739289	0.799789	0.847853	0.845469	0.667349	0.789203	0.849702	0.700868	0.782286	0.861295	0.666791	0.762342	0.778354
6.25667	0.716844	0.769092	0.759951	0.629189	0.795369	0.734249	0.78968	0.851302	0.84036	0.664201	0.792533	0.841877	0.698813	0.77255	0.859493	0.660698	0.755885	0.775254
6.26	0.714139	0.769679	0.758153	0.623877	0.788554	0.736564	0.792577	0.848611	0.837984	0.660724	0.789493	0.83963	0.693528	0.770492	0.851082	0.657972	0.751825	0.767181
6.26333	0.711399	0.769117	0.76216	0.625869	0.793496	0.732782	0.787888	0.845655	0.834455	0.661688	0.784112	0.836675	0.687716	0.767023	0.850424	0.65414	0.748682	0.763049
6.26667	0.714116	0.764376	0.755422	0.628382	0.791884	0.733858	0.785517	0.841326	0.833528	0.657673	0.777148	0.831681	0.684961	0.762095	0.845791	0.65114	0.742317	0.759402
6.27	0.71587	0.763405	0.75785	0.621945	0.791444	0.730878	0.783351	0.840453	0.829	0.654326	0.775115	0.825295	0.67954	0.756781	0.844944	0.646272	0.739719	0.758691
6.27333	0.715504	0.764525	0.757924	0.624486	0.787046	0.732494	0.7819	0.837194	0.829452	0.652349	0.769951	0.825525	0.678715	0.753883	0.834172	0.642317	0.734429	0.753154
6.27667	0.710194	0.765759	0.751956	0.62017	0.789046	0.72692	0.778641	0.837224	0.827239	0.645281	0.767456	0.82451	0.675509	0.746841	0.83425	0.63675	0.728447	0.748344
6.28	0.712068	0.767942	0.75834	0.621887	0.783374	0.725854	0.778665	0.834455	0.826957	0.644139	0.768245	0.824565	0.666712	0.744617	0.825231	0.635979	0.728086	0.740191
6.28333	0.712786	0.762393	0.751568	0.61843	0.780669	0.724306	0.778203	0.831155	0.819769	0.645741	0.768407	0.817688	0.666372	0.737053	0.825653	0.631836	0.721316	0.739931
6.28667	0.709184	0.76063	0.759089	0.617236	0.781103	0.728621	0.769966	0.829021	0.823577	0.633557	0.758092	0.814995	0.662599	0.739387	0.826481	0.62954	0.718851	0.731443
6.29	0.709677	0.761025	0.751556	0.614513	0.777178	0.722146	0.771271	0.829782	0.820477	0.631407	0.757958	0.817888	0.65543	0.732286	0.820835	0.620756	0.712189	0.730777
6.29333	0.710501	0.757164	0.754992	0.615957	0.781203	0.726153	0.767935	0.82163	0.821465	0.636405	0.75983	0.805568	0.650475	0.725295	0.814278	0.616894	0.707918	0.721122
6.29667	0.707064	0.759772	0.753664	0.614055	0.778846	0.7251	0.763865	0.827616	0.818095	0.62553	0.752905	0.805748	0.650454	0.727622	0.813949	0.614532	0.705166	0.722865
6.3	0.708179	0.756613	0.748773	0.612807	0.777329	0.720798	0.765113	0.824144	0.816843	0.621619	0.748902	0.808984	0.649869	0.719013	0.80682	0.61041	0.709894	0.717052
6.30333	0.703447	0.755878	0.749999	0.608478	0.780026	0.726689	0.768707	0.824383	0.812709	0.623547	0.741664	0.804147	0.639295	0.716584	0.80224	0.605266	0.697194	0.713747
6.30667	0.701767	0.758831	0.751027	0.607358	0.778608	0.722862	0.759879	0.821215	0.812757	0.614706	0.741817	0.796586	0.639321	0.712166	0.804315	0.593966	0.692455	0.705611
6.31	0.705143	0.754004	0.750271	0.6099	0.775569	0.713675	0.758301	0.817736	0.807499	0.614144	0.730715	0.798207	0.633204	0.708864	0.797711	0.598144	0.691796	0.703186
6.31333	0.701446	0.756081	0.745789	0.605186	0.772931	0.719198	0.754822	0.809584	0.807883	0.614707	0.738397	0.790151	0.629901	0.704704	0.789664	0.59022	0.682736	0.699986
6.31667	0.702571	0.7578	0.745062	0.608028	0.771554	0.716716	0.755703	0.813676	0.805943	0.608283	0.738031	0.793692	0.624063	0.702486	0.791555	0.590815	0.681499	0.700564
6.32	0.699162	0.753171	0.746496	0.605069	0.772741	0.718915	0.748278	0.80834	0.804773	0.599225	0.731587	0.784791	0.619522	0.697458	0.783498	0.584578	0.676345	0.689912
6.32333	0.70005	0.751549	0.740932	0.606105	0.767067	0.711802	0.748605	0.807567	0.805167	0.606052	0.729292	0.782299	0.618869	0.694807	0.778724	0.579756	0.669816	0.690484
6.32667	0.702516	0.751222	0.741463	0.600798	0.77035	0.708738	0.748343	0.808618	0.798571	0.598017	0.723704	0.778952	0.617462	0.685659	0.777972	0.579203	0.667622	0.68609
6.33	0.701276	0.756689	0.744494	0.604528	0.765574	0.71003	0.749396	0.802608	0.802869	0.595265	0.723874	0.77631	0.611755	0.683284	0.771753	0.574193	0.6689	0.684597
6.33333	0.693932	0.748743	0.743595	0.597602	0.768147	0.714769	0.745255	0.801855	0.797835	0.597032	0.717575	0.781071	0.60505	0.682237	0.766572	0.569437	0.658557	0.67831
6.33667	0.697197	0.748716	0.744246	0.602089	0.764153	0.70949	0.743272	0.800897	0.797644	0.591804	0.717494	0.773633	0.606329	0.681113	0.76685	0.571246	0.654222	0.673919
6.34	0.699477	0.751581	0.743774	0.599163	0.765983	0.70658	0.739306	0.800338	0.796056	0.584872	0.713042	0.770947	0.598235	0.670102	0.761658	0.557842	0.652747	0.667857
6.34333	0.696239	0.749801	0.739972	0.599712	0.764317	0.707994	0.740603	0.795881	0.789589	0.579623	0.711145	0.770683	0.595073	0.671172	0.760228	0.556631	0.649494	0.667961
6.34667	0.694743	0.746653	0.741258	0.598548	0.758825	0.703218	0.733802	0.79538	0.788723	0.579554	0.704802	0.765024	0.594471	0.66807	0.754654	0.551345	0.644678	0.660311
6.35	0.695786	0.743988	0.738842	0.599529	0.761158	0.709978	0.734693	0.793131	0.788751	0.573551	0.709104	0.758577	0.58887	0.666475	0.751629	0.546212	0.647535	0.655136
6.35333	0.693767	0.751041	0.734853	0.594483	0.7604	0.705105	0.733402	0.79191	0.787724	0.567162	0.705339	0.759778	0.585306	0.660383	0.750999	0.547222	0.638316	0.657968
6.35667	0.692047	0.747486	0.73829	0.593702	0.757294	0.705696	0.731196	0.784991	0.790242	0.564398	0.702982	0.754296	0.580245	0.65947	0.745842	0.540117	0.632714	0.64722
6.36	0.690857	0.742734	0.738392	0.591872	0.75469	0.703685	0.73248	0.782847	0.790864	0.56713	0.695034	0.756802	0.578714	0.653581	0.745464	0.53604	0.630418	0.646995
6.36333	0.695734	0.744203	0.733432	0.593751	0.758666	0.701636	0.726621	0.782582	0.781691	0.563772	0.692818	0.759568	0.573598	0.648283	0.739581	0.534323	0.629272	0.646848
6.36667	0.695031	0.74578	0.736774	0.587959	0.760327	0.692029	0.725019	0.785715	0.783679	0.560506	0.688144	0.749999	0.569157	0.640359	0.735565	0.530673	0.618338	0.640308
6.37	0.690746	0.748859	0.731877	0.586233	0.753044	0.701368	0.727669	0.780448	0.782273	0.563296	0.685274	0.746643	0.566794	0.643877	0.732409	0.530655	0.617916	0.632847
6.37333	0.690135	0.743725	0.729713	0.586616	0.755452	0.696273	0.716866	0.778983	0.77789	0.552889	0.686618	0.746204	0.563897	0.640715	0.729918	0.526806	0.618334	0.630682
6.37667	0.692173	0.742713	0.730189	0.589416	0.749806	0.698581	0.718487	0.777791	0.770183	0.55159	0.686807	0.742887	0.561465	0.634775	0.725567	0.519943	0.610683	0.630733
6.38	0.69334	0.738666	0.735016	0.584176	0.754213	0.696024	0.718511	0.774688	0.774666	0.547544	0.680979	0.736503	0.556153	0.631002	0.723772	0.520514	0.608651	0.626184
6.38333	0.687566	0.741543	0.727824	0.583225	0.751911	0.698525	0.71255	0.775147	0.768711	0.548153	0.675722	0.733932	0.551512	0.629816	0.714875	0.514532	0.605285	0.6199
6.38667	0.689708	0.735281	0.729684	0.580693	0.750689	0.694626	0.715712	0.772007	0.773071	0.54357	0.676687	0.735023	0.550242	0.625283	0.716025	0.510582	0.599958	0.614894
6.39	0.687046	0.739312	0.72653	0.583064	0.748641	0.692603	0.712903	0.765955	0.766957	0.543558	0.670908	0.72838	0.545724	0.622844	0.707316	0.509083	0.597558	0.614751
6.39333	0.686316	0.741993	0.72929	0.582362	0.748898	0.694879	0.709757	0.76501	0.7652	0.535372	0.674448	0.728143	0.542616	0.609671	0.707342	0.506233	0.593365	0.605732
6.39667	0.684518	0.738605	0.730206	0.577819	0.747149	0.695986	0.707432	0.766062	0.764571	0.53548	0.669971	0.725421	0.538204	0.61318	0.702559	0.499787	0.587513	0.607014
6.4	0.68513	0.732132	0.727833	0.581121	0.744586	0.69046	0.70657	0.761442	0.761104	0.534234	0.663193	0.723084	0.533102	0.607827	0.700665	0.497221	0.58473	0.603701
6.40333	0.682471	0.740855	0.728925	0.581488	0.745288	0.687712	0.704557	0.764424	0.762825	0.535084	0.663996	0.719739	0.53289	0.604493	0.703949	0.492734	0.58169	0.599473
6.40667	0.687569	0.73046	0.725068	0.574842	0.746507	0.689446	0.702586	0.758996	0.761484	0.52704	0.661455	0.71715	0.528305	0.604773	0.697148	0.493944	0.579945	0.592722
6.41	0.681591	0.734281	0.726488	0.576127	0.743172	0.684975	0.701551	0.76047	0.757329	0.526643	0.658294	0.716228	0.5241	0.602152	0.688684	0.483761	0.577361	0.593342
6.41333	0.682459	0.732461	0.726691	0.574718	0.741298	0.684459	0.699973	0.755684	0.760515	0.526052	0.661142	0.70999	0.519645	0.594286	0.689508	0.478017	0.572483	0.590458
6.41667	0.68098	0.735673	0.717792	0.576929	0.742884	0.688817	0.698126	0.753471	0.754766	0.519525	0.659248	0.709964	0.526236	0.595228	0.68998	0.476644	0.568161	0.581365
6.42	0.684353	0.733159	0.721896	0.5738	0.74364	0.683778	0.698617	0.746923	0.74925	0.514208	0.652816	0.703539	0.515095	0.590063	0.685438	0.478933	0.563425	0.581471
6.42333	0.682213	0.733115	0.729932	0.569604	0.737022	0.69093	0.694942	0.747823	0.750846	0.510465	0.648225	0.707171	0.511853	0.586388	0.682076	0.469033	0.55946	0.581549
6.42667	0.682504	0.733741	0.724403	0.571898	0.739524	0.687531	0.689714	0.746552	0.753678	0.510909	0.649654	0.702281	0.508	0.582154	0.674769	0.464235	0.558414	0.572924
6.43	0.678695	0.729395	0.716455	0.568918	0.734225	0.683094	0.690757	0.750183	0.747534	0.509335	0.645127	0.702931	0.510766	0.580083	0.671232	0.466737	0.553775	0.570769
6.43333	0.677011	0.729664	0.719489	0.568482	0.733347	0.679898	0.691486	0.74373	0.748494	0.506351	0.640359	0.700413	0.505478	0.569495	0.670928	0.462168	0.548555	0.56216
6.43667	0.678446	0.725908	0.722768	0.571272	0.735271	0.68264	0.682442	0.746718	0.746718	0.504347	0.640306	0.699659	0.499498	0.573297	0.667007	0.460862	0.548469	0.562311
6.44	0.684151	0.727724	0.716663	0.564041	0.73538	0.68216	0.681911	0.741629	0.746739	0.498865	0.630815	0.695808	0.492604	0.56972	0.659616	0.459712	0.545696	0.556697
6.44333	0.67327	0.728872	0.719146	0.566974	0.734071	0.682248	0.683609	0.742214	0.744546	0.494596	0.632613	0.68922	0.498618	0.568274	0.662383	0.452728	0.541803	0.552778
6.44667	0.675845	0.725834	0.717368	0.564794	0.730439	0.6817	0.683784	0.736066	0.743255	0.49883	0.63275	0.692566	0.491096	0.563626	0.657781	0.450613	0.539801	0.552877
6.45	0.675264	0.732082	0.715852	0.568589	0.735004	0.68242	0.678927	0.736623	0.741074	0.488753	0.631394	0.691138	0.487555	0.563002	0.653593	0.44597	0.535168	0.546084
6.45333	0.674055	0.724505	0.72045	0.564105	0.733635	0.679006	0.677851	0.736612	0.737567	0.48969	0.631534	0.68355	0.484988	0.564222	0.652767	0.436183	0.530207	0.543543
6.45667	0.673559	0.726424	0.71957	0.564178	0.733609	0.670263	0.678288	0.73226	0.737907	0.485463	0.625068	0.680287	0.476778	0.552671	0.64929	0.444324	0.525605	0.543839
6.46	0.671732	0.726115	0.713384	0.556014	0.728878	0.675579	0.675234	0.731202	0.736159	0.477773	0.621678	0.679302	0.475865	0.552548	0.645786	0.435385	0.525879	0.539359
6.46333	0.675632	0.726336	0.720912	0.558277	0.730921	0.672433	0.669856	0.733119	0.735084	0.484533	0.62012	0.675418	0.469934	0.549067	0.640844	0.435931	0.519383	0.537269
6.46667	0.677117	0.723959	0.714211	0.557698	0.728201	0.667751	0.673651	0.729302	0.734284	0.47559	0.617455	0.679816	0.469161	0.540987	0.64593	0.427198	0.518249	0.535409
6.47	0.673778	0.725675	0.713621	0.551965	0.731186	0.67271	0.674094	0.726388	0.730964	0.477822	0.615982	0.673734	0.469917	0.541135	0.635658	0.432242	0.511268	0.529078
6.47333	0.674054	0.723318	0.714219	0.559882	0.727781	0.672178	0.668173	0.726573	0.724984	0.476182	0.611077	0.671173	0.467808	0.538892	0.635052	0.421321	0.510234	0.523702
6.47667	0.673695	0.725192	0.711549	0.553469	0.722726	0.664468	0.663235	0.724062	0.732336	0.46964	0.607175	0.664042	0.460465	0.538243	0.630684	0.413623	0.509239	0.522224
6.48	0.6696	0.722538	0.712289	0.558078	0.723694	0.673759	0.666177	0.720593	0.726447	0.474191	0.60507	0.666979	0.457986	0.534132	0.630518	0.416326	0.504763	0.523422
6.48333	0.673858	0.722432	0.712398	0.555795	0.727691	0.665957	0.665869	0.72018	0.726581	0.46364	0.607205	0.665888	0.457745	0.52731	0.625563	0.415295	0.49752	0.517715
6.48667	0.671187	0.719214	0.711104	0.555019	0.721841	0.667115	0.662167	0.71524	0.720146	0.466958	0.603983	0.658487	0.45107	0.521534	0.622128	0.411999	0.503583	0.517219
6.49	0.67019	0.72411	0.70701	0.553675	0.717364	0.666966	0.663149	0.717008	0.722857	0.456052	0.600941	0.659328	0.452535	0.522089	0.622714	0.403067	0.492549	0.508976
6.49333	0.671118	0.719234	0.705725	0.552138	0.720781	0.664085	0.661839	0.712095	0.72661	0.460497	0.595642	0.661519	0.447495	0.518717	0.616155	0.406956	0.496564	0.50597
6.49667	0.667397	0.719928	0.713803	0.550245	0.717844	0.663119	0.658275	0.713961	0.718883	0.45787	0.595997	0.658683	0.448238	0.516746	0.612172	0.399498	0.488649	0.50751
6.5	0.66858	0.718636	0.708983	0.550743	0.717961	0.661228	0.654463	0.715287	0.72312	0.453906	0.597878	0.653911	0.443955	0.515579	0.613942	0.400702	0.487019	0.501966
6.50333	0.66493	0.718625	0.707712	0.54795	0.715732	0.664731	0.660184	0.708142	0.715031	0.449888	0.591331	0.649287	0.43792	0.511305	0.608302	0.396649	0.481886	0.499662
6.50667	0.666455	0.71827	0.707039	0.548608	0.717024	0.66618	0.6564	0.709244	0.715367	0.44886	0.591673	0.64834	0.434739	0.506462	0.602154	0.393523	0.482879	0.495208
6.51	0.666557	0.716148	0.706193	0.549126	0.71495	0.664004	0.651452	0.704811	0.712773	0.442697	0.590069	0.648537	0.43052	0.509295	0.601605	0.392642	0.477109	0.491092
6.51333	0.662553	0.714808	0.708436	0.545019	0.71666	0.6606	0.650418	0.707104	0.712501	0.444016	0.587932	0.645086	0.431218	0.501063	0.604064	0.383615	0.471432	0.49009
6.51667	0.665477	0.716375	0.703474	0.543835	0.716144	0.662075	0.648391	0.701483	0.70876	0.437744	0.577621	0.642324	0.42293	0.492924	0.595927	0.386627	0.46787	0.479385
6.52	0.66378	0.713872	0.703677	0.542782	0.71119	0.65593	0.648644	0.70692	0.709086	0.44112	0.578594	0.637053	0.424017	0.495008	0.596251	0.381898	0.46841	0.483692
6.52333	0.668291	0.714712	0.700444	0.538383	0.713677	0.655326	0.645489	0.696864	0.706856	0.438608	0.57509	0.638977	0.422884	0.492166	0.594808	0.382569	0.462533	0.481961
6.52667	0.6615	0.717295	0.704117	0.545244	0.717506	0.662437	0.641595	0.698028	0.702413	0.437007	0.574392	0.63992	0.417246	0.49303	0.586246	0.37446	0.460938	0.476776
6.53	0.66299	0.71661	0.704524	0.545048	0.711596	0.655424	0.641029	0.702188	0.70884	0.431421	0.576205	0.634848	0.416475	0.485913	0.587048	0.367093	0.458123	0.475374
6.53333	0.660015	0.713999	0.701699	0.537189	0.711431	0.657096	0.637287	0.694038	0.700629	0.431919	0.565061	0.632065	0.412868	0.484064	0.583695	0.365273	0.455213	0.472152
6.53667	0.661347	0.711026	0.700273	0.54056	0.712964	0.657524	0.636539	0.692058	0.703355	0.425452	0.567354	0.629251	0.410779	0.486259	0.577583	0.363191	0.455751	0.464821
6.54	0.661076	0.713097	0.698304	0.544304	0.707749	0.652038	0.637103	0.69159	0.704763	0.420353	0.566463	0.624976	0.411105	0.473804	0.574733	0.361029	0.450415	0.465549
6.54333	0.659773	0.706799	0.702585	0.541342	0.704462	0.655843	0.637111	0.691527	0.70176	0.426337	0.564287	0.626453	0.403036	0.475921	0.573947	0.357812	0.442327	0.457363
6.54667	0.66167	0.711069	0.705601	0.536657	0.702089	0.64821	0.634392	0.689925	0.695713	0.421347	0.561045	0.623958	0.401461	0.470801	0.56936	0.358416	0.442254	0.458114
6.55	0.659683	0.710072	0.700686	0.537114	0.700721	0.652858	0.630968	0.687243	0.697433	0.416242	0.565713	0.62016	0.393347	0.47006	0.571143	0.352377	0.439292	0.463143
6.55333	0.657147	0.710755	0.699223	0.536494	0.701688	0.647737	0.63164	0.690035	0.699056	0.418591	0.56224	0.614676	0.394172	0.463536	0.572993	0.352999	0.434065	0.45762
6.55667	0.66289	0.710494	0.704454	0.53506	0.706766	0.650947	0.630073	0.686231	0.694228	0.414457	0.559051	0.614892	0.395547	0.464097	0.564507	0.351367	0.431185	0.45121
6.56	0.660895	0.711905	0.698889	0.536362	0.703966	0.649338	0.628916	0.678703	0.695189	0.410644	0.554276	0.620825	0.387461	0.464007	0.560341	0.347402	0.430177	0.446482
6.56333	0.656743	0.709812	0.696351	0.535604	0.699369	0.653491	0.629074	0.677645	0.696024	0.41065	0.553124	0.617119	0.385529	0.456028	0.561344	0.337377	0.425291	0.438922
6.56667	0.653505	0.706584	0.69765	0.530867	0.699848	0.649517	0.625929	0.681876	0.686543	0.401255	0.550159	0.608827	0.385469	0.456521	0.555761	0.33542	0.426789	0.442545
6.57	0.65605	0.707509	0.695015	0.53196	0.699685	0.648595	0.620372	0.679511	0.693175	0.405693	0.554256	0.61059	0.38135	0.454367	0.551426	0.341771	0.421663	0.436249
6.57333	0.660664	0.707422	0.696286	0.536015	0.700793	0.645049	0.629109	0.679896	0.692021	0.404666	0.546656	0.603154	0.37799	0.450568	0.551098	0.334842	0.421289	0.437957
6.57667	0.654914	0.706135	0.698948	0.525639	0.691787	0.644809	0.627271	0.679782	0.68489	0.39756	0.543954	0.604621	0.376333	0.446606	0.539911	0.333118	0.418139	0.432199
6.58	0.655019	0.708715	0.692126	0.526528	0.696312	0.646034	0.620771	0.672586	0.68428	0.397508	0.538132	0.600453	0.371264	0.446618	0.547047	0.324297	0.416751	0.430171
6.58333	0.65716	0.703322	0.695957	0.529698	0.696036	0.646788	0.619069	0.674313	0.684852	0.393517	0.539481	0.607977	0.368059	0.444027	0.543278	0.326842	0.412267	0.424837
6.58667	0.653675	0.704927	0.693346	0.528408	0.697578	0.645899	0.619902	0.666276	0.679367	0.398382	0.537586	0.600045	0.367245	0.434978	0.540826	0.323271	0.410884	0.428591
6.59	0.652726	0.705972	0.692663	0.527137	0.698004	0.643867	0.615512	0.673661	0.680555	0.390734	0.536015	0.59568	0.365278	0.436121	0.536827	0.320453	0.40742	0.422366
6.59333	0.65099	0.703835	0.690025	0.526113	0.699678	0.643772	0.613987	0.667692	0.682824	0.387493	0.536	0.590381	0.364611	0.433859	0.53139	0.320107	0.404449	0.424235
6.59667	0.649221	0.701087	0.691019	0.526658	0.693156	0.636081	0.611804	0.663824	0.685275	0.385922	0.526147	0.592463	0.358568	0.432806	0.533128	0.314864	0.399467	0.411878
6.6	0.653567	0.701223	0.692904	0.525346	0.690273	0.645151	0.612586	0.666455	0.681261	0.389853	0.530291	0.591962	0.35845	0.428858	0.530763	0.31252	0.397924	0.415352
6.60333	0.656094	0.700691	0.694373	0.523475	0.694029	0.639023	0.613392	0.666241	0.678384	0.38597	0.525678	0.58925	0.352746	0.429216	0.527592	0.30687	0.39202	0.411233
6.60667	0.651001	0.705558	0.694994	0.523697	0.692551	0.63896	0.60898	0.661793	0.678145	0.380535	0.524086	0.587012	0.351249	0.428102	0.527837	0.307244	0.393269	0.408054
6.61	0.655738	0.696289	0.693691	0.522624	0.691644	0.635971	0.608208	0.666601	0.673709	0.380181	0.529045	0.585725	0.347955	0.419915	0.52401	0.304519	0.385688	0.407351
6.61333	0.646763	0.696148	0.689238	0.517377	0.691135	0.638663	0.60456	0.663132	0.670821	0.37575	0.524797	0.581541	0.345057	0.418579	0.524057	0.300654	0.389293	0.400447
6.61667	0.651236	0.701504	0.693019	0.52603	0.691791	0.637712	0.603333	0.657146	0.672053	0.37599	0.525723	0.579724	0.346023	0.418972	0.514012	0.298604	0.381107	0.398001
6.62	0.644358	0.697791	0.689521	0.523987	0.687215	0.633075	0.605417	0.658844	0.670026	0.368716	0.51825	0.580708	0.341221	0.411834	0.512751	0.298719	0.382775	0.400723
6.62333	0.653882	0.70043	0.685768	0.519468	0.690784	0.635608	0.599365	0.652267	0.664637	0.363952	0.517805	0.581383	0.338741	0.412357	0.510625	0.295509	0.378071	0.389844
6.62667	0.653288	0.70126	0.68479	0.519621	0.691059	0.633261	0.598851	0.656486	0.670137	0.368138	0.51638	0.571805	0.338301	0.408317	0.515432	0.295806	0.377307	0.390924
6.63	0.649728	0.696744	0.686685	0.521688	0.687628	0.631269	0.600571	0.65323	0.669951	0.369617	0.509958	0.576089	0.329753	0.403692	0.508207	0.2882	0.369445	0.390213
6.63333	0.648403	0.697395	0.689114	0.516643	0.684311	0.632256	0.592856	0.654391	0.664473	0.3613	0.509511	0.572304	0.332828	0.405757	0.503392	0.284937	0.370867	0.387302
6.63667	0.654182	0.696485	0.686332	0.518359	0.686651	0.638695	0.599196	0.646968	0.667688	0.360294	0.507116	0.570677	0.330529	0.404863	0.506071	0.283089	0.364972	0.385089
6.64	0.64527	0.697339	0.682371	0.518003	0.68889	0.632347	0.592503	0.64643	0.664987	0.359238	0.505866	0.567739	0.328156	0.400213	0.502794	0.275793	0.360867	0.378446
6.64333	0.644038	0.700121	0.689831	0.515977	0.688058	0.636336	0.592044	0.651335	0.665109	0.361856	0.506058	0.565342	0.322905	0.395652	0.496409	0.275165	0.367261	0.378026
6.64667	0.649588	0.692896	0.68619	0.515368	0.683493	0.633307	0.595763	0.644053	0.66167	0.356217	0.503662	0.565587	0.319636	0.391666	0.49483	0.278529	0.356711	0.379318
6.65	0.648928	0.696352	0.687337	0.515423	0.683846	0.636269	0.59322	0.642274	0.662683	0.351253	0.49885	0.562354	0.323001	0.388003	0.492856	0.270518	0.355528	0.378272
6.65333	0.649927	0.694696	0.681389	0.515282	0.684176	0.632145	0.587442	0.645482	0.662364	0.355147	0.500895	0.557676	0.31325	0.388992	0.494465	0.266878	0.355885	0.370879
6.65667	0.64309	0.696524	0.682518	0.513253	0.685733	0.627024	0.585697	0.640913	0.656172	0.348339	0.496657	0.561101	0.316217	0.385406	0.485269	0.27004	0.355322	0.368553
6.66	0.646193	0.694554	0.686951	0.514282	0.678903	0.627686	0.590126	0.638496	0.657279	0.34339	0.495834	0.556768	0.310322	0.384591	0.482694	0.268456	0.349713	0.36308
[truncated: 1,584 more rows]
