# Supplementary material for: Early steps of protein disaggregation by Hsp70 chaperone and class B J-domain proteins are shaped by Hsp110
Source: eLife. 2024 Oct 15;13:RP94795. doi: 10.7554/eLife.94795 (PMC11479587; doi:10.7554/eLife.94795)
Supplement: Figure 4—source data 2. [file elife-94795-fig4-data2.xlsx]

## Sheet: Fig. 4B
Ssa1, Sis1 0.1 uM, Sse1 0 uM	0.7	0.685336	0.710704	0.703527	0.765275	0.751725	0.825786	0.859382	0.896939	0.957759	1.00212	1.04314	1.12265	1.1487	1.22418	1.29626	1.33085	1.37973	1.44036	1.44915	1.54412	1.568	1.6386	1.65283	1.72893	1.72695	1.79804	1.82261	1.83863	1.89073	1.91269	1.95495	1.98453	1.99232	2.01577	2.04021	2.04547	2.09788	2.15344	2.11452	2.14997	2.17076	2.18827	2.22224	2.22051	2.24699	2.25973	2.25447	2.28659
Ssa1, Sis1 0.1 uM, Sse1 0.1 uM	0.7	0.71454	0.763604	0.79782	0.867055	0.964565	1.08113	1.23742	1.36568	1.50861	1.66341	1.76791	1.86338	2.01695	2.10907	2.23907	2.338	2.39752	2.46205	2.54775	2.59991	2.69086	2.74283	2.80037	2.87765	2.87487	2.96019	2.99508	3.02701	3.11629	3.11338	3.16375	3.17909	3.26497	3.29096	3.27932	3.36192	3.34825	3.35951	3.4637	3.4384	3.4426	3.44471	3.49198	3.49507	3.54024	3.53442	3.59165	3.62729
Ssa1, Sis1 0.1 uM, Sse1 0.5 uM	0.7	0.688244	0.74164	0.817743	0.919893	0.984859	1.14548	1.25159	1.36729	1.4536	1.57889	1.64578	1.75374	1.85831	1.92581	2.02326	2.06731	2.13172	2.19712	2.26567	2.31078	2.37333	2.39833	2.44028	2.53927	2.53655	2.58097	2.59347	2.63072	2.69575	2.71666	2.76944	2.75168	2.8005	2.81058	2.85773	2.90432	2.89219	2.9376	2.95765	2.9824	2.99125	3.00269	2.99465	3.02917	3.07378	3.08511	3.07347	3.10534
Ssa1, Sis1 0.1 uM, Sse1 1 uM	0.7	0.743001	0.716025	0.795592	0.856908	0.879305	0.964874	1.03528	1.10966	1.17914	1.25301	1.31191	1.36599	1.38443	1.44451	1.49685	1.54134	1.57815	1.62264	1.61899	1.67343	1.72361	1.73555	1.74514	1.76018	1.8119	1.81172	1.85348	1.8408	1.86567	1.94944	1.91863	1.95792	1.95433	1.97654	1.99721	2.00587	2.0417	2.03235	2.03712	2.09453	2.05593	2.05562	2.09435	2.09057	2.11798	2.14354	2.10703	2.17119
Ssa1, Sis1 0.1 uM, Sse1 2 uM	0.7	0.688616	0.684656	0.689296	0.713426	0.732483	0.740712	0.712808	0.764038	0.763852	0.764842	0.758655	0.784579	0.802398	0.838346	0.826467	0.829808	0.833891	0.840202	0.86755	0.877325	0.885616	0.892608	0.871633	0.899104	0.896011	0.897124	0.879243	0.916181	0.915005	0.904858	0.910179	0.932515	0.921255	0.918223	0.94786	0.932392	0.909189	0.954109	0.954232	0.959677	0.951077	0.933134	0.940002	0.939012	0.949344	0.962709	0.96605	0.971185
Ssa1, Sis1 0.1 uM, Sse1 4 uM	0.7	0.718995	0.725986	0.729451	0.700928	0.712746	0.724378	0.714045	0.723944	0.745909	0.766822	0.765584	0.787301	0.798872	0.808771	0.814092	0.811679	0.853505	0.820589	0.848617	0.849545	0.852824	0.884131	0.903559	0.884379	0.921007	0.889824	0.896568	0.898362	0.921255	0.89267	0.925029	0.951386	0.931092	0.914016	0.956089	0.957883	0.931402	0.951077	0.944766	0.960976	0.952129	0.941487	0.972052	0.947303	0.950273	0.940126	0.968525	0.984426
Ssa1, Sis1 0.1 uM, Sse1 0 uM	0.7	0.70792	0.749312	0.758964	0.793551	0.834881	0.859692	0.906529	0.976259	1.05205	1.1216	1.18211	1.25332	1.32243	1.37366	1.44271	1.50298	1.55891	1.59114	1.65165	1.69515	1.74236	1.76903	1.82057	1.86839	1.91263	1.97147	1.97005	2.02846	2.06422	2.09435	2.12442	2.13054	2.15771	2.19403	2.21358	2.28844	2.2963	2.32161	2.33707	2.31876	2.33924	2.38799	2.38168	2.40371	2.4214	2.43613	2.46069	2.4524
Ssa1, Sis1 0.1 uM, Sse1 0.1 uM	0.7	0.743867	0.801903	0.849112	0.945013	1.09363	1.24243	1.38115	1.57759	1.68012	1.84259	1.9888	2.07133	2.20126	2.31721	2.41064	2.49788	2.55276	2.66549	2.73677	2.82729	2.87295	2.88823	2.96322	3.03889	3.08975	3.13572	3.17414	3.20792	3.27734	3.32888	3.33748	3.36879	3.40826	3.47323	3.51295	3.47162	3.54216	3.58058	3.64325	3.64381	3.67165	3.68335	3.69399	3.7777	3.77467	3.77628	3.8092	3.79119
Ssa1, Sis1 0.1 uM, Sse1 0.5 uM	0.7	0.752282	0.78297	0.859073	0.9697	1.05713	1.17413	1.29781	1.42155	1.50669	1.59987	1.69428	1.7874	1.88219	1.94944	1.9737	2.10747	2.11755	2.17769	2.23752	2.28832	2.32519	2.39096	2.43792	2.46459	2.47338	2.54069	2.57794	2.59953	2.6249	2.63907	2.6843	2.73225	2.74883	2.74066	2.83818	2.812	2.85643	2.87115	2.88749	2.9329	2.94589	2.92752	2.96749	2.99613	2.98339	2.99923	3.04081	3.04755
Ssa1, Sis1 0.1 uM, Sse1 1 uM	0.7	0.733597	0.780124	0.830364	0.863466	0.943281	1.02223	1.06535	1.14956	1.1899	1.25629	1.30845	1.35157	1.36896	1.46554	1.50712	1.53162	1.5925	1.60995	1.63427	1.67863	1.67114	1.73413	1.71124	1.74162	1.7517	1.80522	1.83851	1.84043	1.82069	1.8924	1.86635	1.9023	1.89599	1.95829	1.93268	1.93404	1.98972	1.94771	1.9823	1.98583	2.00816	2.00507	2.00866	2.05382	2.08266	2.03798	2.06719	2.08544
Ssa1, Sis1 0.1 uM, Sse1 2 uM	0.7	0.676612	0.717262	0.705197	0.742135	0.759645	0.75717	0.7813	0.800233	0.806729	0.82659	0.843358	0.867426	0.877635	0.891803	0.917913	0.889514	0.887287	0.926514	0.939321	0.964874	0.944085	0.956398	0.98127	0.968215	1.01443	0.988076	0.991232	1.00039	1.02935	0.998285	1.00361	1.00998	1.0114	1.03819	1.02873	1.00101	1.0317	1.05143	1.00577	1.03355	1.04605	1.05904	1.0463	1.01963	1.05867	1.06319	1.03083	1.05948
Ssa1, Sis1 0.1 uM, Sse1 4 uM	0.7	0.708786	0.707177	0.709095	0.743867	0.737618	0.754386	0.771524	0.781981	0.800913	0.825167	0.806729	0.838346	0.847936	0.865013	0.89168	0.861734	0.865693	0.883636	0.925895	0.922183	0.926204	0.939074	0.921316	0.922121	0.930968	0.953057	0.959739	0.965988	0.976383	0.952314	0.962461	0.995439	0.970752	0.961348	0.996862	0.971433	0.989623	0.998904	0.992717	0.971309	0.989561	1.01103	1.00342	1.00757	1.00255	1.00064	0.976878	0.992222
Ssa1, Sis1 0.1 uM, Sse1 0 uM	0.7	0.714849	0.728461	0.735267	0.733906	0.766884	0.772514	0.830798	0.866374	0.897186	0.935485	1.02761	1.05193	1.10693	1.14956	1.22294	1.23594	1.30672	1.36977	1.40627	1.4601	1.48311	1.51931	1.56831	1.6003	1.64745	1.6756	1.71606	1.72578	1.75863	1.79062	1.82273	1.84686	1.88151	1.88974	1.90688	1.97562	1.96825	1.99956	2.00618	2.01286	2.0688	2.09249	2.09101	2.13475	2.11842	2.15028	2.16198	2.17187
Ssa1, Sis1 0.1 uM, Sse1 0.1 uM	0.7	0.729204	0.708105	0.755499	0.818299	0.904116	0.993336	1.1284	1.24002	1.35553	1.5091	1.63922	1.68568	1.81289	1.91127	1.9948	2.07839	2.12999	2.2382	2.2838	2.34877	2.39146	2.43471	2.54515	2.5582	2.57243	2.61154	2.66741	2.75694	2.72928	2.75409	2.81163	2.86942	2.86942	2.92919	2.92467	2.95499	2.99811	2.95759	2.98525	3.07174	3.06815	3.10169	3.12755	3.12402	3.15929	3.14048	3.17785	3.20396
Ssa1, Sis1 0.1 uM, Sse1 0.5 uM	0.7	0.723326	0.742692	0.779939	0.844409	0.942539	1.05465	1.17518	1.21174	1.34607	1.45849	1.51912	1.62381	1.69317	1.73927	1.82978	1.86474	1.91071	1.95749	2.03916	2.07814	2.1113	2.18184	2.20337	2.24754	2.27737	2.31498	2.36368	2.3656	2.40216	2.43001	2.49435	2.5311	2.4972	2.56334	2.55969	2.60529	2.59124	2.62224	2.65658	2.68653	2.69531	2.73844	2.72105	2.71808	2.76832	2.79647	2.79499	2.77735
Ssa1, Sis1 0.1 uM, Sse1 1 uM	0.7	0.710889	0.743125	0.72809	0.772328	0.848864	0.882956	0.93796	1.00027	1.00515	1.05725	1.1044	1.14282	1.20475	1.19331	1.25097	1.27819	1.31253	1.35201	1.33722	1.39043	1.39043	1.39352	1.42081	1.44061	1.47946	1.47198	1.51294	1.50564	1.51541	1.5581	1.55155	1.59653	1.59517	1.61719	1.56534	1.60513	1.63037	1.62004	1.66063	1.66694	1.68513	1.66211	1.68247	1.71507	1.69181	1.73469	1.75981	1.72541
Ssa1, Sis1 0.1 uM, Sse1 2 uM	0.7	0.685089	0.70464	0.722583	0.702908	0.719985	0.752591	0.738794	0.743001	0.763543	0.767193	0.777031	0.776536	0.799243	0.792189	0.814401	0.818361	0.834572	0.840821	0.858021	0.863404	0.852453	0.87881	0.8798	0.902817	0.880976	0.885864	0.879553	0.900342	0.911974	0.903868	0.901703	0.890813	0.910736	0.907457	0.93035	0.940126	0.915872	0.9168	0.924658	0.95151	0.913644	0.929607	0.93796	0.961843	0.951386	0.933443	0.932886	0.947303
Ssa1, Sis1 0.1 uM, Sse1 4 uM	0.7	0.685646	0.67853	0.683047	0.692637	0.683666	0.692328	0.702042	0.693689	0.739784	0.738608	0.728647	0.762738	0.76311	0.746652	0.786435	0.783775	0.787116	0.773442	0.814463	0.795345	0.788415	0.797201	0.824734	0.803574	0.840945	0.814401	0.797943	0.828075	0.835252	0.854742	0.854742	0.83618	0.854866	0.85301	0.851834	0.855175	0.856351	0.850906	0.847565	0.850535	0.847503	0.847317	0.888339	0.85567	0.872932	0.880357	0.854123	0.894711
Ssa1, Sis1 1 uM, Sse1 0 uM	0.7	0.712436	0.722088	0.767626	0.769482	0.793427	0.837789	0.85171	0.87782	0.918347	0.957326	0.979291	1.02031	1.07538	1.10062	1.13075	1.14635	1.17796	1.20846	1.2532	1.24515	1.30362	1.29793	1.34211	1.38882	1.39402	1.42898	1.445	1.42236	1.46641	1.48287	1.49202	1.5083	1.5242	1.56429	1.58892	1.59387	1.5922	1.61818	1.64349	1.6386	1.67653	1.62276	1.66595	1.66459	1.69509	1.70066	1.73611	1.74892
Ssa1, Sis1 1 uM, Sse1 0.1 uM	0.7	0.738423	0.765028	0.824363	0.890875	0.973041	1.08392	1.18174	1.27696	1.42545	1.50161	1.63513	1.74038	1.84191	1.91641	1.97877	2.04306	2.14508	2.20485	2.27594	2.31369	2.35712	2.40618	2.50666	2.51192	2.5707	2.5824	2.66772	2.69389	2.75805	2.75527	2.80464	2.78794	2.83991	2.85562	2.88842	2.94738	2.96557	2.98673	3.00133	3.01835	3.04062	3.06116	3.0525	3.10027	3.14729	3.11443	3.12582	3.17853
Ssa1, Sis1 1 uM, Sse1 0.5 uM	0.7	0.717695	0.763295	0.835005	0.936475	1.05502	1.1685	1.29614	1.38313	1.4932	1.6102	1.67492	1.7582	1.8528	1.88999	1.98279	1.99826	2.10685	2.14812	2.20009	2.24303	2.28609	2.34846	2.35112	2.43081	2.43495	2.50747	2.53568	2.54775	2.55059	2.61302	2.68009	2.64192	2.72235	2.71047	2.71035	2.75347	2.81213	2.794	2.82586	2.80458	2.8675	2.8938	2.9071	2.89101	2.97479	2.95914	2.97726	3.01457
Ssa1, Sis1 1 uM, Sse1 1 uM	0.7	0.744362	0.814525	0.888895	1.00701	1.11634	1.16478	1.23736	1.36692	1.43925	1.50947	1.58069	1.62369	1.66112	1.73809	1.78053	1.82564	1.86097	1.88634	1.94369	1.9857	1.95774	1.99845	2.03532	2.10505	2.13395	2.14218	2.17596	2.16488	2.18951	2.22645	2.23969	2.24637	2.26109	2.30966	2.31004	2.34122	2.37661	2.35075	2.38174	2.43836	2.38843	2.41299	2.41002	2.47678	2.43465	2.52752	2.47907	2.46812
Ssa1, Sis1 1 uM, Sse1 2 uM	0.7	0.742692	0.762553	0.812174	0.852267	0.87516	0.922368	1.01091	1.02074	1.10681	1.12964	1.14276	1.18297	1.19516	1.24639	1.23711	1.29001	1.28741	1.32973	1.3298	1.35949	1.3757	1.40485	1.39247	1.41549	1.45255	1.4278	1.44147	1.45756	1.47235	1.48113	1.49499	1.4846	1.50353	1.56373	1.56281	1.54196	1.56114	1.61546	1.56881	1.62709	1.57598	1.60209	1.63074	1.62777	1.63229	1.61521	1.6339	1.60723
Ssa1, Sis1 1 uM, Sse1 4 uM	0.7	0.675251	0.657556	0.64085	0.669745	0.67587	0.677664	0.70693	0.687254	0.72215	0.733658	0.719923	0.745167	0.761006	0.769544	0.764161	0.778949	0.771957	0.7998	0.798067	0.792932	0.816876	0.815701	0.829127	0.833458	0.851215	0.85567	0.84212	0.826467	0.835871	0.826714	0.840573	0.865508	0.868911	0.861672	0.882956	0.863961	0.840945	0.871942	0.882337	0.880419	0.886854	0.868601	0.88939	0.893969	0.8983	0.912778	0.89038	0.878996
Ssa1, Sis1 1 uM, Sse1 0 uM	0.7	0.702784	0.76181	0.746033	0.829436	0.828385	0.865941	0.911602	0.956893	0.985602	1.06944	1.08336	1.15055	1.1602	1.22034	1.24348	1.28816	1.28766	1.36395	1.40336	1.43504	1.44754	1.50112	1.46165	1.52649	1.55588	1.54864	1.59603	1.6227	1.64541	1.67486	1.65048	1.71458	1.69589	1.76049	1.75999	1.75801	1.80009	1.79885	1.82057	1.87675	1.86443	1.86678	1.88794	1.90756	1.92711	1.90886	1.92587	1.97939
Ssa1, Sis1 1 uM, Sse1 0.1 uM	0.7	0.712931	0.75785	0.83154	0.898609	1.02266	1.14641	1.26149	1.3697	1.47018	1.60494	1.71019	1.79198	1.92841	1.96572	2.03526	2.08587	2.18332	2.24563	2.28832	2.3716	2.43749	2.46997	2.52764	2.56439	2.57943	2.60851	2.68721	2.68269	2.72984	2.79858	2.77958	2.82648	2.88056	2.91384	2.94218	2.92461	3.00084	3.03579	3.00758	3.07935	3.09228	3.09185	3.09829	3.14945	3.17433	3.17946	3.15261	3.16412
Ssa1, Sis1 1 uM, Sse1 0.5 uM	0.7	0.758222	0.817186	0.919522	1.01549	1.1237	1.24206	1.30796	1.45787	1.55705	1.64361	1.69837	1.7723	1.858	1.93404	1.97896	2.01484	2.08179	2.13989	2.17819	2.23845	2.26697	2.31919	2.39783	2.3883	2.44467	2.47777	2.48068	2.5209	2.53915	2.60436	2.62076	2.63363	2.63882	2.68467	2.72848	2.73293	2.73726	2.788	2.76919	2.84517	2.81961	2.85989	2.87814	2.88606	2.87647	2.93049	2.94144	2.92201
Ssa1, Sis1 1 uM, Sse1 1 uM	0.7	0.716396	0.805059	0.888153	0.991479	1.05774	1.16132	1.25889	1.31625	1.41648	1.47817	1.50922	1.57821	1.63087	1.65345	1.70239	1.74236	1.80776	1.79835	1.84451	1.8442	1.92612	1.93391	1.96937	2.00426	2.02443	2.01602	2.04974	2.10462	2.13395	2.10926	2.12392	2.16235	2.17095	2.19755	2.19149	2.2296	2.22063	2.27056	2.25027	2.24408	2.3213	2.27551	2.29271	2.34369	2.32587	2.36195	2.37166	2.40631
Ssa1, Sis1 1 uM, Sse1 2 uM	0.7	0.713117	0.741578	0.810689	0.86458	0.862538	0.912407	0.930473	0.970133	0.997543	1.02087	1.05409	1.03535	1.07915	1.11473	1.10966	1.13873	1.13168	1.14851	1.13261	1.18669	1.16806	1.18087	1.19461	1.19597	1.21193	1.23309	1.22461	1.22115	1.24763	1.24973	1.26823	1.27956	1.27467	1.29756	1.29144	1.28116	1.30678	1.31724	1.31928	1.31513	1.32052	1.29601	1.32689	1.34396	1.31977	1.32565	1.35541	1.35807
Ssa1, Sis1 1 uM, Sse1 4 uM	0.7	0.681871	0.689296	0.714478	0.748446	0.753272	0.780867	0.7714	0.832654	0.810318	0.838284	0.834201	0.859382	0.88209	0.899166	0.903992	0.91451	0.922306	0.95151	0.935176	0.939136	0.931525	0.931463	0.968463	0.989314	0.949963	0.956583	0.985478	1.00169	0.981023	1.02248	0.987025	0.993459	0.987272	1.02316	0.988386	1.0231	1.02879	1.03405	0.990056	1.03485	1.00268	1.01493	1.01586	1.04642	1.0119	1.0463	1.05527	1.01858
Ssa1, Sis1 1 uM, Sse1 0 uM	0.7	0.737433	0.759583	0.771462	0.764842	0.788601	0.837789	0.85567	0.878377	0.900218	0.929174	0.9697	0.972299	1.03999	1.06467	1.05292	1.09326	1.13577	1.16045	1.18365	1.23544	1.26675	1.26396	1.27987	1.28859	1.34421	1.34675	1.37434	1.38461	1.40002	1.43789	1.41357	1.43312	1.44315	1.47272	1.52049	1.49444	1.50378	1.54851	1.58706	1.55742	1.58137	1.57419	1.59783	1.63161	1.62282	1.65085	1.63093	1.6378
Ssa1, Sis1 1 uM, Sse1 0.1 uM	0.7	0.670487	0.736133	0.748446	0.811988	0.90987	1.00775	1.12562	1.23105	1.33555	1.42273	1.52389	1.65896	1.74415	1.83077	1.92135	1.9789	2.04788	2.06873	2.2072	2.23635	2.26895	2.31455	2.35997	2.40383	2.46738	2.51106	2.55585	2.62311	2.59904	2.67681	2.67434	2.73305	2.75391	2.76554	2.84238	2.83861	2.86348	2.8701	2.84962	2.93024	2.92176	2.99273	2.98531	2.96613	3.00214	3.02658	3.06673	3.02447
Ssa1, Sis1 1 uM, Sse1 0.5 uM	0.7	0.724254	0.749993	0.801841	0.892732	0.971371	1.05465	1.18842	1.28636	1.40033	1.47396	1.54381	1.64472	1.74873	1.80095	1.87928	1.94023	1.9982	2.05995	2.14824	2.1629	2.24841	2.27477	2.28021	2.36937	2.38515	2.39474	2.44269	2.49677	2.5243	2.54348	2.54094	2.57342	2.61203	2.62843	2.67842	2.65763	2.68486	2.70546	2.75477	2.79783	2.80879	2.80087	2.85556	2.83731	2.8443	2.88204	2.84733	2.89033
Ssa1, Sis1 1 uM, Sse1 1 uM	0.7	0.697525	0.741949	0.794169	0.861672	0.917233	1.01456	1.08423	1.13793	1.21447	1.30208	1.38523	1.39897	1.48943	1.5195	1.61311	1.63272	1.62406	1.69633	1.72355	1.75461	1.81196	1.82323	1.85534	1.85218	1.91739	1.91758	1.98521	1.95037	1.97537	2.04003	2.01627	2.01033	2.06416	2.09225	2.08092	2.09565	2.07542	2.15282	2.19798	2.14997	2.20157	2.21067	2.20324	2.20949	2.23987	2.24841	2.30768	2.29154
Ssa1, Sis1 1 uM, Sse1 2 uM	0.7	0.684779	0.73273	0.749869	0.817371	0.834696	0.881409	0.914696	0.95516	0.971618	0.995625	1.05341	1.06826	1.11522	1.09604	1.11269	1.16126	1.17289	1.15544	1.20259	1.19986	1.22517	1.24782	1.26768	1.27368	1.2743	1.28215	1.28785	1.28475	1.33635	1.32633	1.3306	1.3478	1.36302	1.35399	1.39284	1.35052	1.35306	1.377	1.3926	1.37725	1.39433	1.39699	1.40497	1.42298	1.43219	1.42873	1.45342	1.44284
Ssa1, Sis1 1 uM, Sse1 4 uM	0.7	0.716149	0.696473	0.697216	0.718623	0.708724	0.725368	0.713736	0.710828	0.756427	0.788291	0.790457	0.777464	0.787673	0.793303	0.799985	0.803883	0.836923	0.859382	0.813659	0.84144	0.817	0.851958	0.861857	0.869158	0.886235	0.861795	0.883203	0.836923	0.869096	0.882956	0.902384	0.879058	0.883141	0.890319	0.893845	0.896815	0.890937	0.902693	0.868663	0.887967	0.89564	0.882894	0.882584	0.897991	0.89168	0.906467	0.902445	0.908756
[truncated: 51 more columns]
