# Supplementary material for: Early steps of protein disaggregation by Hsp70 chaperone and class B J-domain proteins are shaped by Hsp110
Source: eLife. 2024 Oct 15;13:RP94795. doi: 10.7554/eLife.94795 (PMC11479587; doi:10.7554/eLife.94795)
Supplement: Figure 4—source data 3. [file elife-94795-fig4-data3.xlsx]

## Sheet: Fig. 4C
		0,05 Sis						0,1 Sis						0,25 Sis						1 Sis						2 Sis
Sse1						Sse1						Sse1						Sse1						Sse1
0	2.96551	2.81633	2.97361			0	2.5084	2.72823	2.4821			0	2.18703	2.46187	2.17806			0	1.94109	2.16624	1.86994			0	1.79872	2.07009	1.75275
0.1	4.07067	3.76855	4.04437			0.1	3.95484	4.18086	3.59085			0.1	3.55175	3.81668	3.59215			0.1	3.5575	3.56022	3.41117			0.1	3.40548	3.77238	3.40554
0.5	3.00158	2.97089	3.33953			0.5	3.48839	3.3855	3.14222			0.5	3.44025	3.50373	3.19821			0.5	3.29949	3.25878	3.19462			0.5	3.29306	3.39867	3.08721
1	1.85701	1.86134	1.98972			1	2.40563	2.31053	1.97067			1	2.65491	2.31362	2.35025			1	2.73312	2.6296	2.52275			1	2.81473	2.59403	2.4912
2	1.0674	0.950458	1.03163			2	0.99117	1.07173	0.962214			2	1.24843	1.15043	1.22041			2	1.72089	1.43077	1.54647			2	1.87792	1.6722	1.74483
4	1.06919	0.887596	0.937713			4	1.00825	1.04877	0.886792			4	0.977187	1.02669	0.899104			4	0.90028	1.05286	0.932515			4	1.07581	0.955655	0.964998
Agonist vs. response -- Variable slope (3 parameters) [2]						Agonist vs. response -- Variable slope (3 parameters) [2]						Agonist vs. response -- Variable slope (3 parameters) [2]						Agonist vs. response -- Variable slope (3 parameters) [2]	Ambiguous		Ambiguous			Agonist vs. response -- Variable slope (3 parameters) [2]	Ambiguous	Ambiguous	Ambiguous
Best-fit values						Best-fit values						Best-fit values						Best-fit values						Best-fit values
Bottom	3.616	3.413	3.659			Bottom	3.431	3.597	3.196			Bottom	3.124	3.341	3.063			Bottom	3.028	3.061	2.877			Bottom	2.945	3.118	2.819
Top	-0.2934	-0.7155	-0.9618			Top	-2.007	-1.294	-1.304			Top	-7.839	-2.131	-3.962			Top	~ -2375	-9.412	~ -846,1			Top	~ -3337	~ -216,3	~ -2078
logEC50	0.1997	0.3001	0.3474			logEC50	0.6157	0.4745	0.4942			logEC50	1.179	0.6695	0.9129			logEC50	~ 3,653	1.29	~ 3,231			logEC50	~ 3,873	~ 2,591	~ 3,659
EC50	1.584	1.996	2.225			EC50	4.128	2.982	3.12			EC50	15.09	4.672	8.183			EC50	~ 4498	19.51	~ 1703			EC50	~ 7457	~ 389,8	~ 4558
Span	-3.91	-4.129	-4.62			Span	-5.438	-4.89	-4.499			Span	-10.96	-5.472	-7.025			Span	~ -2378	-12.47	~ -848,9			Span	~ -3340	~ -219,4	~ -2081
Std. Error						Std. Error						Std. Error						Std. Error						Std. Error
Bottom	0.5141	0.4599	0.5268			Bottom	0.6313	0.6045	0.515			Bottom	0.5681	0.5899	0.5337			Bottom	0.543	0.5127	0.5268			Bottom	0.5579	0.5583	0.5289
Top	1.992	2.283	2.964			Top	7.981	4.889	4.419			Top	61.24	8.944	19.71			Top	~ 4,291e+006	88.52	~ 597291			Top	~ 1,212e+007	~ 33379	~ 4,293e+006
logEC50	0.573	0.5676	0.6307			logEC50	1.143	0.8778	0.8478			logEC50	3.033	1.218	1.756			logEC50	~ 784,5	3.686	~ 306,3			logEC50	~ 1576	~ 66,74	~ 896,7
Span	1.874	2.152	2.8			Span	7.715	4.666	4.225			Span	60.94	8.685	19.44			Span	~ 4,291e+006	88.25	~ 597291			Span	~ 1,212e+007	~ 33378	~ 4,293e+006
95% Confidence Intervals						95% Confidence Intervals						95% Confidence Intervals						95% Confidence Intervals						95% Confidence Intervals
Bottom	1,980 to 5,252	1,950 to 4,876	1,982 to 5,335			Bottom	1,422 to 5,440	1,673 to 5,520	1,557 to 4,834			Bottom	1,317 to 4,932	1,464 to 5,218	1,365 to 4,761			Bottom	1,300 to 4,756	1,429 to 4,692	1,201 to 4,553			Bottom	1,169 to 4,720	1,342 to 4,895	1,136 to 4,502
Top	-6,632 to 6,046	-7,981 to 6,550	-10,39 to 8,468			Top	-27,40 to 23,39	-16,85 to 14,26	-15,37 to 12,76			Top	-202,7 to 187,0	-30,59 to 26,33	-66,68 to 58,75			Top	(Very wide)	-291,1 to 272,3	(Very wide)			Top	(Very wide)	(Very wide)	(Very wide)
logEC50	-1,623 to 2,023	-1,506 to 2,106	-1,660 to 2,354			logEC50	-3,020 to 4,251	-2,319 to 3,268	-2,203 to 3,192			logEC50	-8,472 to 10,83	-3,207 to 4,546	-4,673 to 6,499			logEC50	(Very wide)	-10,44 to 13,02	(Very wide)			logEC50	(Very wide)	(Very wide)	(Very wide)
EC50	0,02380 to 105,4	0,03119 to 127,7	0,02189 to 226,1			EC50	0,0009552 to 17838	0,004801 to 1852	0,006260 to 1555			EC50	3,374e-009 to 6,750e+010	0,0006212 to 35143	2,123e-005 to 3,155e+006			EC50	(Very wide)	3,639e-011 to 1,046e+013	(Very wide)			EC50	(Very wide)	(Very wide)	(Very wide)
Span	-9,871 to 2,052	-10,98 to 2,719	-13,53 to 4,290			Span	-29,99 to 19,11	-19,74 to 9,958	-17,94 to 8,946			Span	-204,9 to 182,9	-33,11 to 22,16	-68,89 to 54,84			Span	(Very wide)	-293,3 to 268,3	(Very wide)			Span	(Very wide)	(Very wide)	(Very wide)
Goodness of Fit						Goodness of Fit						Goodness of Fit						Goodness of Fit						Goodness of Fit
Degrees of Freedom	3	3	3			Degrees of Freedom	3	3	3			Degrees of Freedom	3	3	3			Degrees of Freedom	3	3	3			Degrees of Freedom	3	3	3
R square	0.8273	0.8465	0.8269			R square	0.708	0.7535	0.7728			R square	0.6594	0.7081	0.6985			R square	0.6277	0.6668	0.6138			R square	0.5343	0.6401	0.57
Absolute Sum of Squares	1.259	1.049	1.401			Absolute Sum of Squares	2.201	1.931	1.41			Absolute Sum of Squares	1.993	1.951	1.689			Absolute Sum of Squares	1.925	1.643	1.811			Absolute Sum of Squares	2.033	2.031	1.827
Sy.x	0.6478	0.5913	0.6834			Sy.x	0.8564	0.8022	0.6856			Sy.x	0.815	0.8063	0.7503			Sy.x	0.801	0.7399	0.777			Sy.x	0.8232	0.8227	0.7803
Number of points						Number of points						Number of points						Number of points						Number of points
Analyzed	6	6	6			Analyzed	6	6	6			Analyzed	6	6	6			Analyzed	6	6	6			Analyzed	6	6	6
